# Supplementary material for: A systems-based framework to computationally describe putative transcription factors and signaling pathways regulating glycan biosynthesis
Source: publisher site journal article supplement (doi:10.3762/bjoc.17.119), 2021-07-22
Supplement: Additional file 2 [file 1860-5397-17-119-S2.cys]

Archive with 322 entries (322 files):
- CytoscapeSession-2021_03_21-12_01/3.0.0.version
- CytoscapeSession-2021_03_21-12_01/networks/105658-Cistrome+Cancer+TF%2DGlycogene+Networks.xgmml
- CytoscapeSession-2021_03_21-12_01/views/113200-130434-LAML.xgmml
- CytoscapeSession-2021_03_21-12_01/views/122667-129845-SKCM.xgmml
- CytoscapeSession-2021_03_21-12_01/views/114920-145915-LGG.xgmml
- CytoscapeSession-2021_03_21-12_01/views/116985-128965-LUAD.xgmml
- CytoscapeSession-2021_03_21-12_01/views/107960-140593-COAD_READ.xgmml
- CytoscapeSession-2021_03_21-12_01/views/128575-155670-ACC.xgmml
- CytoscapeSession-2021_03_21-12_01/views/128148-137935-UVM.xgmml
- CytoscapeSession-2021_03_21-12_01/views/105674-132612-Luminal+Breast.xgmml
- CytoscapeSession-2021_03_21-12_01/views/120744-149102-PRAD.xgmml
- CytoscapeSession-2021_03_21-12_01/views/112204-144582-KIRP.xgmml
- CytoscapeSession-2021_03_21-12_01/views/117543-138583-LUSC.xgmml
- CytoscapeSession-2021_03_21-12_01/views/109659-139114-HNSC.xgmml
- CytoscapeSession-2021_03_21-12_01/views/123839-150618-TGCT.xgmml
- CytoscapeSession-2021_03_21-12_01/views/117847-143713-MESO.xgmml
- CytoscapeSession-2021_03_21-12_01/views/121907-148007-SARC.xgmml
- CytoscapeSession-2021_03_21-12_01/views/108538-157620-GBM.xgmml
- CytoscapeSession-2021_03_21-12_01/views/124859-155975-THCA.xgmml
- CytoscapeSession-2021_03_21-12_01/views/123032-154045-STES.xgmml
- CytoscapeSession-2021_03_21-12_01/views/111080-136447-KIRC.xgmml
- CytoscapeSession-2021_03_21-12_01/views/107263-159055-CESC.xgmml
- CytoscapeSession-2021_03_21-12_01/views/118318-141405-PAAD.xgmml
- CytoscapeSession-2021_03_21-12_01/views/159940-160556-BLCA.xgmml
- CytoscapeSession-2021_03_21-12_01/views/110777-155206-KICH.xgmml
- CytoscapeSession-2021_03_21-12_01/views/116589-135857-LIHC.xgmml
- CytoscapeSession-2021_03_21-12_01/views/118033-144061-OV.xgmml
- CytoscapeSession-2021_03_21-12_01/views/127699-133755-UCEC.xgmml
- CytoscapeSession-2021_03_21-12_01/views/126090-151992-THYM.xgmml
- CytoscapeSession-2021_03_21-12_01/views/120164-135031-PCPG.xgmml
- CytoscapeSession-2021_03_21-12_01/views/106825-134412-Basal+Breast.xgmml
- CytoscapeSession-2021_03_21-12_01/tables/112204-KIRP/LOCAL_ATTRS-org.cytoscape.model.CyEdge-KIRP+default+edge.cytable
- CytoscapeSession-2021_03_21-12_01/tables/116985-LUAD/LOCAL_ATTRS-org.cytoscape.model.CyNetwork-LUAD+default+network.cytable
- CytoscapeSession-2021_03_21-12_01/tables/122667-SKCM/LOCAL_ATTRS-org.cytoscape.model.CyNetwork-SKCM+default+network.cytable
- CytoscapeSession-2021_03_21-12_01/tables/105658-Cistrome+Cancer+TF%2DGlycogene+Networks/SHARED_ATTRS-org.cytoscape.model.CyNode-105658+shared+node.cytable
- CytoscapeSession-2021_03_21-12_01/tables/122667-SKCM/LOCAL_ATTRS-org.cytoscape.model.CyEdge-SKCM+default+edge.cytable
- CytoscapeSession-2021_03_21-12_01/tables/128575-ACC/HIDDEN-org.cytoscape.model.CyNetwork-128575+hidden+network.cytable
- CytoscapeSession-2021_03_21-12_01/tables/108538-GBM/HIDDEN-org.cytoscape.model.CyNetwork-108538+hidden+network.cytable
- CytoscapeSession-2021_03_21-12_01/tables/120164-PCPG/HIDDEN-org.cytoscape.model.CyNetwork-120164+hidden+network.cytable
- CytoscapeSession-2021_03_21-12_01/tables/110777-KICH/HIDDEN-org.cytoscape.model.CyNetwork-110777+hidden+network.cytable
- CytoscapeSession-2021_03_21-12_01/tables/124859-THCA/LOCAL_ATTRS-org.cytoscape.model.CyNetwork-THCA+default+network.cytable
- CytoscapeSession-2021_03_21-12_01/tables/127699-UCEC/LOCAL_ATTRS-org.cytoscape.model.CyNetwork-UCEC+default+network.cytable
- CytoscapeSession-2021_03_21-12_01/tables/123839-TGCT/LOCAL_ATTRS-org.cytoscape.model.CyNode-TGCT+default+node.cytable
- CytoscapeSession-2021_03_21-12_01/tables/117543-LUSC/HIDDEN-org.cytoscape.model.CyNetwork-117543+hidden+network.cytable
- CytoscapeSession-2021_03_21-12_01/tables/105674-Luminal+Breast/LOCAL_ATTRS-org.cytoscape.model.CyNode-Luminal+Breast+default+node.cytable
- CytoscapeSession-2021_03_21-12_01/tables/114920-LGG/HIDDEN-org.cytoscape.model.CyNode-114920+hidden+node.cytable
- CytoscapeSession-2021_03_21-12_01/tables/117543-LUSC/HIDDEN-org.cytoscape.model.CyNode-117543+hidden+node.cytable
- CytoscapeSession-2021_03_21-12_01/tables/108538-GBM/HIDDEN-org.cytoscape.model.CyEdge-108538+hidden+edge.cytable
- CytoscapeSession-2021_03_21-12_01/tables/123032-STES/HIDDEN-org.cytoscape.model.CyEdge-123032+hidden+edge.cytable
- CytoscapeSession-2021_03_21-12_01/tables/120164-PCPG/LOCAL_ATTRS-org.cytoscape.model.CyNode-PCPG+default+node.cytable
- CytoscapeSession-2021_03_21-12_01/tables/124859-THCA/org.baderlab.autoannotate.annotationSet-org.cytoscape.model.CyNetwork-org.baderlab.autoannotate.annotationSet.cytable
- CytoscapeSession-2021_03_21-12_01/tables/127699-UCEC/org.baderlab.autoannotate.annotationSet-org.cytoscape.model.CyNetwork-org.baderlab.autoannotate.annotationSet.cytable
- CytoscapeSession-2021_03_21-12_01/tables/118318-PAAD/LOCAL_ATTRS-org.cytoscape.model.CyEdge-PAAD+default+edge.cytable
- CytoscapeSession-2021_03_21-12_01/tables/126090-THYM/HIDDEN-org.cytoscape.model.CyEdge-126090+hidden+edge.cytable
- CytoscapeSession-2021_03_21-12_01/tables/106825-Basal+Breast/HIDDEN-org.cytoscape.model.CyNode-106825+hidden+node.cytable
- CytoscapeSession-2021_03_21-12_01/tables/128575-ACC/LOCAL_ATTRS-org.cytoscape.model.CyNetwork-ACC+default+network.cytable
- CytoscapeSession-2021_03_21-12_01/tables/117847-MESO/LOCAL_ATTRS-org.cytoscape.model.CyNode-MESO+default+node.cytable
- CytoscapeSession-2021_03_21-12_01/tables/118318-PAAD/HIDDEN-org.cytoscape.model.CyNetwork-118318+hidden+network.cytable
- CytoscapeSession-2021_03_21-12_01/tables/116985-LUAD/HIDDEN-org.cytoscape.model.CyEdge-116985+hidden+edge.cytable
- CytoscapeSession-2021_03_21-12_01/tables/127699-UCEC/HIDDEN-org.cytoscape.model.CyNode-127699+hidden+node.cytable
- CytoscapeSession-2021_03_21-12_01/tables/106825-Basal+Breast/LOCAL_ATTRS-org.cytoscape.model.CyEdge-Basal+Breast+default+edge.cytable
- CytoscapeSession-2021_03_21-12_01/tables/111080-KIRC/HIDDEN-org.cytoscape.model.CyEdge-111080+hidden+edge.cytable
- CytoscapeSession-2021_03_21-12_01/tables/159940-BLCA/LOCAL_ATTRS-org.cytoscape.model.CyNode-BLCA+default++node.cytable
- CytoscapeSession-2021_03_21-12_01/tables/118318-PAAD/org.baderlab.autoannotate.annotationSet-org.cytoscape.model.CyNetwork-org.baderlab.autoannotate.annotationSet.cytable
- CytoscapeSession-2021_03_21-12_01/tables/117847-MESO/HIDDEN-org.cytoscape.model.CyNode-117847+hidden+node.cytable
- CytoscapeSession-2021_03_21-12_01/tables/117847-MESO/LOCAL_ATTRS-org.cytoscape.model.CyNetwork-MESO+default+network.cytable
- CytoscapeSession-2021_03_21-12_01/tables/121907-SARC/HIDDEN-org.cytoscape.model.CyNode-121907+hidden+node.cytable
- CytoscapeSession-2021_03_21-12_01/tables/121907-SARC/HIDDEN-org.cytoscape.model.CyEdge-121907+hidden+edge.cytable
- CytoscapeSession-2021_03_21-12_01/tables/120164-PCPG/org.baderlab.autoannotate.cluster-org.cytoscape.model.CyNetwork-org.baderlab.autoannotate.cluster.cytable
- CytoscapeSession-2021_03_21-12_01/tables/120744-PRAD/LOCAL_ATTRS-org.cytoscape.model.CyNetwork-PRAD+default+network.cytable
- CytoscapeSession-2021_03_21-12_01/tables/121907-SARC/org.baderlab.autoannotate.annotationSet-org.cytoscape.model.CyNetwork-org.baderlab.autoannotate.annotationSet.cytable
- CytoscapeSession-2021_03_21-12_01/tables/110777-KICH/org.baderlab.autoannotate.cluster-org.cytoscape.model.CyNetwork-org.baderlab.autoannotate.cluster.cytable
- CytoscapeSession-2021_03_21-12_01/tables/106825-Basal+Breast/HIDDEN-org.cytoscape.model.CyEdge-106825+hidden+edge.cytable
- CytoscapeSession-2021_03_21-12_01/tables/112204-KIRP/HIDDEN-org.cytoscape.model.CyNetwork-112204+hidden+network.cytable
- CytoscapeSession-2021_03_21-12_01/tables/120744-PRAD/org.baderlab.autoannotate.annotationSet-org.cytoscape.model.CyNetwork-org.baderlab.autoannotate.annotationSet.cytable
- CytoscapeSession-2021_03_21-12_01/tables/116589-LIHC/LOCAL_ATTRS-org.cytoscape.model.CyEdge-LIHC+default+edge.cytable
- CytoscapeSession-2021_03_21-12_01/tables/118033-OV/HIDDEN-org.cytoscape.model.CyNetwork-118033+hidden+network.cytable
- CytoscapeSession-2021_03_21-12_01/tables/123839-TGCT/HIDDEN-org.cytoscape.model.CyEdge-123839+hidden+edge.cytable
- CytoscapeSession-2021_03_21-12_01/tables/159940-BLCA/HIDDEN-org.cytoscape.model.CyNetwork-159940+hidden+network.cytable
- CytoscapeSession-2021_03_21-12_01/tables/107960-COAD_READ/HIDDEN-org.cytoscape.model.CyNetwork-107960+hidden+network.cytable
- CytoscapeSession-2021_03_21-12_01/tables/105674-Luminal+Breast/org.baderlab.autoannotate.annotationSet-org.cytoscape.model.CyNetwork-org.baderlab.autoannotate.annotationSet.cytable
- CytoscapeSession-2021_03_21-12_01/tables/112204-KIRP/org.baderlab.autoannotate.cluster-org.cytoscape.model.CyNetwork-org.baderlab.autoannotate.cluster.cytable
- CytoscapeSession-2021_03_21-12_01/tables/105674-Luminal+Breast/LOCAL_ATTRS-org.cytoscape.model.CyEdge-Luminal+Breast+default+edge.cytable
- CytoscapeSession-2021_03_21-12_01/tables/126090-THYM/LOCAL_ATTRS-org.cytoscape.model.CyNode-THYM+default+node.cytable
- CytoscapeSession-2021_03_21-12_01/tables/127699-UCEC/LOCAL_ATTRS-org.cytoscape.model.CyNode-UCEC+default+node.cytable
- CytoscapeSession-2021_03_21-12_01/tables/124859-THCA/HIDDEN-org.cytoscape.model.CyNode-124859+hidden+node.cytable
- CytoscapeSession-2021_03_21-12_01/tables/118033-OV/HIDDEN-org.cytoscape.model.CyEdge-118033+hidden+edge.cytable
- CytoscapeSession-2021_03_21-12_01/tables/117543-LUSC/org.baderlab.autoannotate.cluster-org.cytoscape.model.CyNetwork-org.baderlab.autoannotate.cluster.cytable
- CytoscapeSession-2021_03_21-12_01/tables/108538-GBM/org.baderlab.autoannotate.annotationSet-org.cytoscape.model.CyNetwork-org.baderlab.autoannotate.annotationSet.cytable
- CytoscapeSession-2021_03_21-12_01/tables/106825-Basal+Breast/HIDDEN-org.cytoscape.model.CyNetwork-106825+hidden+network.cytable
- CytoscapeSession-2021_03_21-12_01/tables/112204-KIRP/LOCAL_ATTRS-org.cytoscape.model.CyNode-KIRP+default+node.cytable
- CytoscapeSession-2021_03_21-12_01/tables/117543-LUSC/LOCAL_ATTRS-org.cytoscape.model.CyEdge-LUSC+default+edge.cytable
- CytoscapeSession-2021_03_21-12_01/tables/109659-HNSC/HIDDEN-org.cytoscape.model.CyEdge-109659+hidden+edge.cytable
- CytoscapeSession-2021_03_21-12_01/tables/121907-SARC/HIDDEN-org.cytoscape.model.CyNetwork-121907+hidden+network.cytable
- CytoscapeSession-2021_03_21-12_01/tables/116589-LIHC/org.baderlab.autoannotate.cluster-org.cytoscape.model.CyNetwork-org.baderlab.autoannotate.cluster.cytable
- CytoscapeSession-2021_03_21-12_01/tables/122667-SKCM/HIDDEN-org.cytoscape.model.CyNetwork-122667+hidden+network.cytable
- CytoscapeSession-2021_03_21-12_01/tables/109659-HNSC/LOCAL_ATTRS-org.cytoscape.model.CyNode-HNSC+default+node.cytable
- CytoscapeSession-2021_03_21-12_01/tables/123839-TGCT/LOCAL_ATTRS-org.cytoscape.model.CyEdge-TGCT+default+edge.cytable
- CytoscapeSession-2021_03_21-12_01/tables/105674-Luminal+Breast/HIDDEN-org.cytoscape.model.CyEdge-105674+hidden+edge.cytable
- CytoscapeSession-2021_03_21-12_01/tables/123839-TGCT/org.baderlab.autoannotate.cluster-org.cytoscape.model.CyNetwork-org.baderlab.autoannotate.cluster.cytable
- CytoscapeSession-2021_03_21-12_01/tables/105674-Luminal+Breast/org.baderlab.autoannotate.cluster-org.cytoscape.model.CyNetwork-org.baderlab.autoannotate.cluster.cytable
- CytoscapeSession-2021_03_21-12_01/tables/105674-Luminal+Breast/HIDDEN-org.cytoscape.model.CyNode-105674+hidden+node.cytable
- CytoscapeSession-2021_03_21-12_01/tables/121907-SARC/LOCAL_ATTRS-org.cytoscape.model.CyNetwork-SARC+default+network.cytable
- CytoscapeSession-2021_03_21-12_01/tables/117543-LUSC/org.baderlab.autoannotate.annotationSet-org.cytoscape.model.CyNetwork-org.baderlab.autoannotate.annotationSet.cytable
- CytoscapeSession-2021_03_21-12_01/tables/120744-PRAD/LOCAL_ATTRS-org.cytoscape.model.CyNode-PRAD+default+node.cytable
- CytoscapeSession-2021_03_21-12_01/tables/118318-PAAD/HIDDEN-org.cytoscape.model.CyEdge-118318+hidden+edge.cytable
- CytoscapeSession-2021_03_21-12_01/tables/113200-LAML/HIDDEN-org.cytoscape.model.CyNode-113200+hidden+node.cytable
- CytoscapeSession-2021_03_21-12_01/tables/128575-ACC/HIDDEN-org.cytoscape.model.CyEdge-128575+hidden+edge.cytable
- CytoscapeSession-2021_03_21-12_01/tables/105658-Cistrome+Cancer+TF%2DGlycogene+Networks/LOCAL_ATTRS-org.cytoscape.model.CyNetwork-105658+default+network.cytable
- CytoscapeSession-2021_03_21-12_01/tables/128575-ACC/org.baderlab.autoannotate.annotationSet-org.cytoscape.model.CyNetwork-org.baderlab.autoannotate.annotationSet.cytable
- CytoscapeSession-2021_03_21-12_01/tables/159940-BLCA/HIDDEN-org.cytoscape.model.CyNode-159940+hidden+node.cytable
- CytoscapeSession-2021_03_21-12_01/tables/116985-LUAD/LOCAL_ATTRS-org.cytoscape.model.CyEdge-LUAD+default+edge.cytable
- CytoscapeSession-2021_03_21-12_01/tables/128575-ACC/org.baderlab.autoannotate.cluster-org.cytoscape.model.CyNetwork-org.baderlab.autoannotate.cluster.cytable
- CytoscapeSession-2021_03_21-12_01/tables/123839-TGCT/HIDDEN-org.cytoscape.model.CyNode-123839+hidden+node.cytable
- CytoscapeSession-2021_03_21-12_01/tables/110777-KICH/LOCAL_ATTRS-org.cytoscape.model.CyNode-KICH+default+node.cytable
- CytoscapeSession-2021_03_21-12_01/tables/159940-BLCA/org.baderlab.autoannotate.annotationSet-org.cytoscape.model.CyNetwork-org.baderlab.autoannotate.annotationSet.cytable
- CytoscapeSession-2021_03_21-12_01/tables/127699-UCEC/org.baderlab.autoannotate.cluster-org.cytoscape.model.CyNetwork-org.baderlab.autoannotate.cluster.cytable
- CytoscapeSession-2021_03_21-12_01/tables/107960-COAD_READ/LOCAL_ATTRS-org.cytoscape.model.CyNetwork-COAD_READ+default+network.cytable
- CytoscapeSession-2021_03_21-12_01/tables/110777-KICH/LOCAL_ATTRS-org.cytoscape.model.CyNetwork-KICH+default+network.cytable
- CytoscapeSession-2021_03_21-12_01/tables/128148-UVM/LOCAL_ATTRS-org.cytoscape.model.CyNetwork-UVM+default+network.cytable
- CytoscapeSession-2021_03_21-12_01/tables/123032-STES/org.baderlab.autoannotate.annotationSet-org.cytoscape.model.CyNetwork-org.baderlab.autoannotate.annotationSet.cytable
- CytoscapeSession-2021_03_21-12_01/tables/121907-SARC/LOCAL_ATTRS-org.cytoscape.model.CyEdge-SARC+default+edge.cytable
- CytoscapeSession-2021_03_21-12_01/tables/107263-CESC/org.baderlab.autoannotate.annotationSet-org.cytoscape.model.CyNetwork-org.baderlab.autoannotate.annotationSet.cytable
- CytoscapeSession-2021_03_21-12_01/tables/123839-TGCT/LOCAL_ATTRS-org.cytoscape.model.CyNetwork-TGCT+default+network.cytable
- CytoscapeSession-2021_03_21-12_01/tables/118033-OV/LOCAL_ATTRS-org.cytoscape.model.CyNetwork-OV+default+network.cytable
- CytoscapeSession-2021_03_21-12_01/tables/122667-SKCM/HIDDEN-org.cytoscape.model.CyEdge-122667+hidden+edge.cytable
- CytoscapeSession-2021_03_21-12_01/tables/109659-HNSC/LOCAL_ATTRS-org.cytoscape.model.CyNetwork-HNSC+default+network.cytable
- CytoscapeSession-2021_03_21-12_01/tables/111080-KIRC/LOCAL_ATTRS-org.cytoscape.model.CyNode-KIRC+default+node.cytable
- CytoscapeSession-2021_03_21-12_01/tables/122667-SKCM/LOCAL_ATTRS-org.cytoscape.model.CyNode-SKCM+default+node.cytable
- CytoscapeSession-2021_03_21-12_01/tables/107960-COAD_READ/HIDDEN-org.cytoscape.model.CyEdge-107960+hidden+edge.cytable
- CytoscapeSession-2021_03_21-12_01/tables/116589-LIHC/HIDDEN-org.cytoscape.model.CyNetwork-116589+hidden+network.cytable
- CytoscapeSession-2021_03_21-12_01/tables/110777-KICH/HIDDEN-org.cytoscape.model.CyNode-110777+hidden+node.cytable
- CytoscapeSession-2021_03_21-12_01/tables/107960-COAD_READ/HIDDEN-org.cytoscape.model.CyNode-107960+hidden+node.cytable
- CytoscapeSession-2021_03_21-12_01/tables/117847-MESO/org.baderlab.autoannotate.annotationSet-org.cytoscape.model.CyNetwork-org.baderlab.autoannotate.annotationSet.cytable
- CytoscapeSession-2021_03_21-12_01/tables/105658-Cistrome+Cancer+TF%2DGlycogene+Networks/SHARED_ATTRS-org.cytoscape.model.CyNetwork-105658+shared+network.cytable
- CytoscapeSession-2021_03_21-12_01/tables/118033-OV/org.baderlab.autoannotate.cluster-org.cytoscape.model.CyNetwork-org.baderlab.autoannotate.cluster.cytable
- CytoscapeSession-2021_03_21-12_01/tables/128148-UVM/org.baderlab.autoannotate.cluster-org.cytoscape.model.CyNetwork-org.baderlab.autoannotate.cluster.cytable
- CytoscapeSession-2021_03_21-12_01/tables/114920-LGG/LOCAL_ATTRS-org.cytoscape.model.CyNetwork-LGG+default+network.cytable
- CytoscapeSession-2021_03_21-12_01/tables/120164-PCPG/LOCAL_ATTRS-org.cytoscape.model.CyNetwork-PCPG+default+network.cytable
- CytoscapeSession-2021_03_21-12_01/tables/114920-LGG/org.baderlab.autoannotate.cluster-org.cytoscape.model.CyNetwork-org.baderlab.autoannotate.cluster.cytable
- CytoscapeSession-2021_03_21-12_01/tables/105674-Luminal+Breast/LOCAL_ATTRS-org.cytoscape.model.CyNetwork-Luminal+Breast+default+network.cytable
- CytoscapeSession-2021_03_21-12_01/tables/113200-LAML/LOCAL_ATTRS-org.cytoscape.model.CyNode-LAML+default+node.cytable
- CytoscapeSession-2021_03_21-12_01/tables/159940-BLCA/LOCAL_ATTRS-org.cytoscape.model.CyNetwork-BLCA+default++network.cytable
- CytoscapeSession-2021_03_21-12_01/tables/126090-THYM/org.baderlab.autoannotate.cluster-org.cytoscape.model.CyNetwork-org.baderlab.autoannotate.cluster.cytable
- CytoscapeSession-2021_03_21-12_01/tables/117543-LUSC/LOCAL_ATTRS-org.cytoscape.model.CyNetwork-LUSC+default+network.cytable
- CytoscapeSession-2021_03_21-12_01/tables/116985-LUAD/HIDDEN-org.cytoscape.model.CyNode-116985+hidden+node.cytable
- CytoscapeSession-2021_03_21-12_01/tables/106825-Basal+Breast/org.baderlab.autoannotate.cluster-org.cytoscape.model.CyNetwork-org.baderlab.autoannotate.cluster.cytable
- CytoscapeSession-2021_03_21-12_01/tables/113200-LAML/LOCAL_ATTRS-org.cytoscape.model.CyEdge-LAML+default+edge.cytable
- CytoscapeSession-2021_03_21-12_01/tables/128148-UVM/LOCAL_ATTRS-org.cytoscape.model.CyEdge-UVM+default+edge.cytable
- CytoscapeSession-2021_03_21-12_01/tables/116985-LUAD/LOCAL_ATTRS-org.cytoscape.model.CyNode-LUAD+default+node.cytable
- CytoscapeSession-2021_03_21-12_01/tables/123032-STES/LOCAL_ATTRS-org.cytoscape.model.CyEdge-STES+default+edge.cytable
- CytoscapeSession-2021_03_21-12_01/tables/116589-LIHC/HIDDEN-org.cytoscape.model.CyNode-116589+hidden+node.cytable
- CytoscapeSession-2021_03_21-12_01/tables/107960-COAD_READ/org.baderlab.autoannotate.annotationSet-org.cytoscape.model.CyNetwork-org.baderlab.autoannotate.annotationSet.cytable
- CytoscapeSession-2021_03_21-12_01/tables/108538-GBM/org.baderlab.autoannotate.cluster-org.cytoscape.model.CyNetwork-org.baderlab.autoannotate.cluster.cytable
- CytoscapeSession-2021_03_21-12_01/tables/114920-LGG/HIDDEN-org.cytoscape.model.CyNetwork-114920+hidden+network.cytable
- CytoscapeSession-2021_03_21-12_01/tables/105674-Luminal+Breast/HIDDEN-org.cytoscape.model.CyNetwork-105674+hidden+network.cytable
- CytoscapeSession-2021_03_21-12_01/tables/120164-PCPG/HIDDEN-org.cytoscape.model.CyEdge-120164+hidden+edge.cytable
- CytoscapeSession-2021_03_21-12_01/tables/105658-Cistrome+Cancer+TF%2DGlycogene+Networks/HIDDEN-org.cytoscape.model.CyNetwork-105658+hidden+network.cytable
- CytoscapeSession-2021_03_21-12_01/tables/128575-ACC/HIDDEN-org.cytoscape.model.CyNode-128575+hidden+node.cytable
- CytoscapeSession-2021_03_21-12_01/tables/126090-THYM/org.baderlab.autoannotate.annotationSet-org.cytoscape.model.CyNetwork-org.baderlab.autoannotate.annotationSet.cytable
- CytoscapeSession-2021_03_21-12_01/tables/128148-UVM/HIDDEN-org.cytoscape.model.CyEdge-128148+hidden+edge.cytable
- CytoscapeSession-2021_03_21-12_01/tables/116589-LIHC/HIDDEN-org.cytoscape.model.CyEdge-116589+hidden+edge.cytable
- CytoscapeSession-2021_03_21-12_01/tables/116985-LUAD/org.baderlab.autoannotate.annotationSet-org.cytoscape.model.CyNetwork-org.baderlab.autoannotate.annotationSet.cytable
- CytoscapeSession-2021_03_21-12_01/tables/107263-CESC/LOCAL_ATTRS-org.cytoscape.model.CyNode-CESC+default+node.cytable
- CytoscapeSession-2021_03_21-12_01/tables/124859-THCA/LOCAL_ATTRS-org.cytoscape.model.CyEdge-THCA+default+edge.cytable
- CytoscapeSession-2021_03_21-12_01/tables/122667-SKCM/org.baderlab.autoannotate.annotationSet-org.cytoscape.model.CyNetwork-org.baderlab.autoannotate.annotationSet.cytable
- CytoscapeSession-2021_03_21-12_01/tables/120744-PRAD/org.baderlab.autoannotate.cluster-org.cytoscape.model.CyNetwork-org.baderlab.autoannotate.cluster.cytable
- CytoscapeSession-2021_03_21-12_01/tables/124859-THCA/HIDDEN-org.cytoscape.model.CyNetwork-124859+hidden+network.cytable
- CytoscapeSession-2021_03_21-12_01/tables/123032-STES/LOCAL_ATTRS-org.cytoscape.model.CyNode-STES+default+node.cytable
- CytoscapeSession-2021_03_21-12_01/tables/114920-LGG/LOCAL_ATTRS-org.cytoscape.model.CyNode-LGG+default+node.cytable
- CytoscapeSession-2021_03_21-12_01/tables/106825-Basal+Breast/org.baderlab.autoannotate.annotationSet-org.cytoscape.model.CyNetwork-org.baderlab.autoannotate.annotationSet.cytable
- CytoscapeSession-2021_03_21-12_01/tables/113200-LAML/HIDDEN-org.cytoscape.model.CyEdge-113200+hidden+edge.cytable
- CytoscapeSession-2021_03_21-12_01/tables/105658-Cistrome+Cancer+TF%2DGlycogene+Networks/SHARED_ATTRS-org.cytoscape.model.CyEdge-105658+shared+edge.cytable
- CytoscapeSession-2021_03_21-12_01/tables/114920-LGG/org.baderlab.autoannotate.annotationSet-org.cytoscape.model.CyNetwork-org.baderlab.autoannotate.annotationSet.cytable
- CytoscapeSession-2021_03_21-12_01/tables/108538-GBM/HIDDEN-org.cytoscape.model.CyNode-108538+hidden+node.cytable
- CytoscapeSession-2021_03_21-12_01/tables/116589-LIHC/LOCAL_ATTRS-org.cytoscape.model.CyNetwork-LIHC+default+network.cytable
- CytoscapeSession-2021_03_21-12_01/tables/124859-THCA/LOCAL_ATTRS-org.cytoscape.model.CyNode-THCA+default+node.cytable
- CytoscapeSession-2021_03_21-12_01/tables/112204-KIRP/org.baderlab.autoannotate.annotationSet-org.cytoscape.model.CyNetwork-org.baderlab.autoannotate.annotationSet.cytable
- CytoscapeSession-2021_03_21-12_01/tables/109659-HNSC/HIDDEN-org.cytoscape.model.CyNetwork-109659+hidden+network.cytable
- CytoscapeSession-2021_03_21-12_01/tables/116985-LUAD/org.baderlab.autoannotate.cluster-org.cytoscape.model.CyNetwork-org.baderlab.autoannotate.cluster.cytable
- CytoscapeSession-2021_03_21-12_01/tables/127699-UCEC/HIDDEN-org.cytoscape.model.CyNetwork-127699+hidden+network.cytable
- CytoscapeSession-2021_03_21-12_01/tables/105658-Cistrome+Cancer+TF%2DGlycogene+Networks/HIDDEN-org.cytoscape.model.CyNode-105658+hidden+node.cytable
- CytoscapeSession-2021_03_21-12_01/tables/107263-CESC/org.baderlab.autoannotate.cluster-org.cytoscape.model.CyNetwork-org.baderlab.autoannotate.cluster.cytable
- CytoscapeSession-2021_03_21-12_01/tables/128148-UVM/HIDDEN-org.cytoscape.model.CyNode-128148+hidden+node.cytable
- CytoscapeSession-2021_03_21-12_01/tables/116589-LIHC/LOCAL_ATTRS-org.cytoscape.model.CyNode-LIHC+default+node.cytable
- CytoscapeSession-2021_03_21-12_01/tables/112204-KIRP/LOCAL_ATTRS-org.cytoscape.model.CyNetwork-KIRP+default+network.cytable
- CytoscapeSession-2021_03_21-12_01/tables/109659-HNSC/org.baderlab.autoannotate.cluster-org.cytoscape.model.CyNetwork-org.baderlab.autoannotate.cluster.cytable
- CytoscapeSession-2021_03_21-12_01/tables/118318-PAAD/org.baderlab.autoannotate.cluster-org.cytoscape.model.CyNetwork-org.baderlab.autoannotate.cluster.cytable
- CytoscapeSession-2021_03_21-12_01/tables/159940-BLCA/org.baderlab.autoannotate.cluster-org.cytoscape.model.CyNetwork-org.baderlab.autoannotate.cluster.cytable
- CytoscapeSession-2021_03_21-12_01/tables/107960-COAD_READ/LOCAL_ATTRS-org.cytoscape.model.CyNode-COAD_READ+default+node.cytable
- CytoscapeSession-2021_03_21-12_01/tables/107263-CESC/LOCAL_ATTRS-org.cytoscape.model.CyNetwork-CESC+default+network.cytable
- CytoscapeSession-2021_03_21-12_01/tables/105658-Cistrome+Cancer+TF%2DGlycogene+Networks/LOCAL_ATTRS-org.cytoscape.model.CyNode-105658+default+node.cytable
- CytoscapeSession-2021_03_21-12_01/tables/120744-PRAD/HIDDEN-org.cytoscape.model.CyNetwork-120744+hidden+network.cytable
- CytoscapeSession-2021_03_21-12_01/tables/110777-KICH/org.baderlab.autoannotate.annotationSet-org.cytoscape.model.CyNetwork-org.baderlab.autoannotate.annotationSet.cytable
- CytoscapeSession-2021_03_21-12_01/tables/123032-STES/org.baderlab.autoannotate.cluster-org.cytoscape.model.CyNetwork-org.baderlab.autoannotate.cluster.cytable
- CytoscapeSession-2021_03_21-12_01/tables/128575-ACC/LOCAL_ATTRS-org.cytoscape.model.CyNode-ACC+default+node.cytable
- CytoscapeSession-2021_03_21-12_01/tables/118033-OV/LOCAL_ATTRS-org.cytoscape.model.CyNode-OV+default+node.cytable
- CytoscapeSession-2021_03_21-12_01/tables/120164-PCPG/HIDDEN-org.cytoscape.model.CyNode-120164+hidden+node.cytable
- CytoscapeSession-2021_03_21-12_01/tables/120744-PRAD/LOCAL_ATTRS-org.cytoscape.model.CyEdge-PRAD+default+edge.cytable
- CytoscapeSession-2021_03_21-12_01/tables/110777-KICH/LOCAL_ATTRS-org.cytoscape.model.CyEdge-KICH+default+edge.cytable
- CytoscapeSession-2021_03_21-12_01/tables/107960-COAD_READ/org.baderlab.autoannotate.cluster-org.cytoscape.model.CyNetwork-org.baderlab.autoannotate.cluster.cytable
- CytoscapeSession-2021_03_21-12_01/tables/114920-LGG/HIDDEN-org.cytoscape.model.CyEdge-114920+hidden+edge.cytable
- CytoscapeSession-2021_03_21-12_01/tables/122667-SKCM/org.baderlab.autoannotate.cluster-org.cytoscape.model.CyNetwork-org.baderlab.autoannotate.cluster.cytable
- CytoscapeSession-2021_03_21-12_01/tables/113200-LAML/org.baderlab.autoannotate.cluster-org.cytoscape.model.CyNetwork-org.baderlab.autoannotate.cluster.cytable
- CytoscapeSession-2021_03_21-12_01/tables/121907-SARC/org.baderlab.autoannotate.cluster-org.cytoscape.model.CyNetwork-org.baderlab.autoannotate.cluster.cytable
- CytoscapeSession-2021_03_21-12_01/tables/111080-KIRC/HIDDEN-org.cytoscape.model.CyNetwork-111080+hidden+network.cytable
- CytoscapeSession-2021_03_21-12_01/tables/111080-KIRC/org.baderlab.autoannotate.cluster-org.cytoscape.model.CyNetwork-org.baderlab.autoannotate.cluster.cytable
- CytoscapeSession-2021_03_21-12_01/tables/111080-KIRC/LOCAL_ATTRS-org.cytoscape.model.CyNetwork-KIRC+default+network.cytable
- CytoscapeSession-2021_03_21-12_01/tables/128148-UVM/LOCAL_ATTRS-org.cytoscape.model.CyNode-UVM+default+node.cytable
- CytoscapeSession-2021_03_21-12_01/tables/118318-PAAD/HIDDEN-org.cytoscape.model.CyNode-118318+hidden+node.cytable
- CytoscapeSession-2021_03_21-12_01/tables/123839-TGCT/HIDDEN-org.cytoscape.model.CyNetwork-123839+hidden+network.cytable
- CytoscapeSession-2021_03_21-12_01/tables/127699-UCEC/HIDDEN-org.cytoscape.model.CyEdge-127699+hidden+edge.cytable
- CytoscapeSession-2021_03_21-12_01/tables/108538-GBM/LOCAL_ATTRS-org.cytoscape.model.CyEdge-GBM+default+edge.cytable
- CytoscapeSession-2021_03_21-12_01/tables/117543-LUSC/LOCAL_ATTRS-org.cytoscape.model.CyNode-LUSC+default+node.cytable
- CytoscapeSession-2021_03_21-12_01/tables/126090-THYM/HIDDEN-org.cytoscape.model.CyNetwork-126090+hidden+network.cytable
- CytoscapeSession-2021_03_21-12_01/tables/105658-Cistrome+Cancer+TF%2DGlycogene+Networks/HIDDEN-org.cytoscape.model.CyEdge-105658+hidden+edge.cytable
- CytoscapeSession-2021_03_21-12_01/tables/112204-KIRP/HIDDEN-org.cytoscape.model.CyEdge-112204+hidden+edge.cytable
- CytoscapeSession-2021_03_21-12_01/tables/117847-MESO/HIDDEN-org.cytoscape.model.CyNetwork-117847+hidden+network.cytable
- CytoscapeSession-2021_03_21-12_01/tables/113200-LAML/LOCAL_ATTRS-org.cytoscape.model.CyNetwork-LAML+default+network.cytable
- CytoscapeSession-2021_03_21-12_01/tables/120164-PCPG/org.baderlab.autoannotate.annotationSet-org.cytoscape.model.CyNetwork-org.baderlab.autoannotate.annotationSet.cytable
- CytoscapeSession-2021_03_21-12_01/tables/127699-UCEC/LOCAL_ATTRS-org.cytoscape.model.CyEdge-UCEC+default+edge.cytable
- CytoscapeSession-2021_03_21-12_01/tables/128148-UVM/HIDDEN-org.cytoscape.model.CyNetwork-128148+hidden+network.cytable
- CytoscapeSession-2021_03_21-12_01/tables/118033-OV/org.baderlab.autoannotate.annotationSet-org.cytoscape.model.CyNetwork-org.baderlab.autoannotate.annotationSet.cytable
- CytoscapeSession-2021_03_21-12_01/tables/121907-SARC/LOCAL_ATTRS-org.cytoscape.model.CyNode-SARC+default+node.cytable
- CytoscapeSession-2021_03_21-12_01/tables/106825-Basal+Breast/LOCAL_ATTRS-org.cytoscape.model.CyNetwork-Basal+Breast+default+network.cytable
- CytoscapeSession-2021_03_21-12_01/tables/113200-LAML/HIDDEN-org.cytoscape.model.CyNetwork-113200+hidden+network.cytable
- CytoscapeSession-2021_03_21-12_01/tables/107263-CESC/HIDDEN-org.cytoscape.model.CyNode-107263+hidden+node.cytable
- CytoscapeSession-2021_03_21-12_01/tables/107263-CESC/HIDDEN-org.cytoscape.model.CyEdge-107263+hidden+edge.cytable
- CytoscapeSession-2021_03_21-12_01/tables/117543-LUSC/HIDDEN-org.cytoscape.model.CyEdge-117543+hidden+edge.cytable
- CytoscapeSession-2021_03_21-12_01/tables/116589-LIHC/org.baderlab.autoannotate.annotationSet-org.cytoscape.model.CyNetwork-org.baderlab.autoannotate.annotationSet.cytable
- CytoscapeSession-2021_03_21-12_01/tables/109659-HNSC/HIDDEN-org.cytoscape.model.CyNode-109659+hidden+node.cytable
- CytoscapeSession-2021_03_21-12_01/tables/122667-SKCM/HIDDEN-org.cytoscape.model.CyNode-122667+hidden+node.cytable
- CytoscapeSession-2021_03_21-12_01/tables/113200-LAML/org.baderlab.autoannotate.annotationSet-org.cytoscape.model.CyNetwork-org.baderlab.autoannotate.annotationSet.cytable
- CytoscapeSession-2021_03_21-12_01/tables/126090-THYM/HIDDEN-org.cytoscape.model.CyNode-126090+hidden+node.cytable
- CytoscapeSession-2021_03_21-12_01/tables/124859-THCA/org.baderlab.autoannotate.cluster-org.cytoscape.model.CyNetwork-org.baderlab.autoannotate.cluster.cytable
- CytoscapeSession-2021_03_21-12_01/tables/123032-STES/HIDDEN-org.cytoscape.model.CyNode-123032+hidden+node.cytable
- CytoscapeSession-2021_03_21-12_01/tables/109659-HNSC/org.baderlab.autoannotate.annotationSet-org.cytoscape.model.CyNetwork-org.baderlab.autoannotate.annotationSet.cytable
- CytoscapeSession-2021_03_21-12_01/tables/120164-PCPG/LOCAL_ATTRS-org.cytoscape.model.CyEdge-PCPG+default+edge.cytable
- CytoscapeSession-2021_03_21-12_01/tables/111080-KIRC/org.baderlab.autoannotate.annotationSet-org.cytoscape.model.CyNetwork-org.baderlab.autoannotate.annotationSet.cytable
- CytoscapeSession-2021_03_21-12_01/tables/159940-BLCA/HIDDEN-org.cytoscape.model.CyEdge-159940+hidden+edge.cytable
- CytoscapeSession-2021_03_21-12_01/tables/118318-PAAD/LOCAL_ATTRS-org.cytoscape.model.CyNetwork-PAAD+default+network.cytable
- CytoscapeSession-2021_03_21-12_01/tables/117847-MESO/LOCAL_ATTRS-org.cytoscape.model.CyEdge-MESO+default+edge.cytable
- CytoscapeSession-2021_03_21-12_01/tables/108538-GBM/LOCAL_ATTRS-org.cytoscape.model.CyNetwork-GBM+default+network.cytable
- CytoscapeSession-2021_03_21-12_01/tables/126090-THYM/LOCAL_ATTRS-org.cytoscape.model.CyEdge-THYM+default+edge.cytable
- CytoscapeSession-2021_03_21-12_01/tables/118033-OV/LOCAL_ATTRS-org.cytoscape.model.CyEdge-OV+default+edge.cytable
- CytoscapeSession-2021_03_21-12_01/tables/106825-Basal+Breast/LOCAL_ATTRS-org.cytoscape.model.CyNode-Basal+Breast+default+node.cytable
- CytoscapeSession-2021_03_21-12_01/tables/123032-STES/HIDDEN-org.cytoscape.model.CyNetwork-123032+hidden+network.cytable
- CytoscapeSession-2021_03_21-12_01/tables/159940-BLCA/LOCAL_ATTRS-org.cytoscape.model.CyEdge-BLCA+default++edge.cytable
- CytoscapeSession-2021_03_21-12_01/tables/123032-STES/LOCAL_ATTRS-org.cytoscape.model.CyNetwork-STES+default+network.cytable
- CytoscapeSession-2021_03_21-12_01/tables/120744-PRAD/HIDDEN-org.cytoscape.model.CyEdge-120744+hidden+edge.cytable
- CytoscapeSession-2021_03_21-12_01/tables/107263-CESC/LOCAL_ATTRS-org.cytoscape.model.CyEdge-CESC+default+edge.cytable
- CytoscapeSession-2021_03_21-12_01/tables/116985-LUAD/HIDDEN-org.cytoscape.model.CyNetwork-116985+hidden+network.cytable
- CytoscapeSession-2021_03_21-12_01/tables/111080-KIRC/HIDDEN-org.cytoscape.model.CyNode-111080+hidden+node.cytable
- CytoscapeSession-2021_03_21-12_01/tables/110777-KICH/HIDDEN-org.cytoscape.model.CyEdge-110777+hidden+edge.cytable
- CytoscapeSession-2021_03_21-12_01/tables/128148-UVM/org.baderlab.autoannotate.annotationSet-org.cytoscape.model.CyNetwork-org.baderlab.autoannotate.annotationSet.cytable
- CytoscapeSession-2021_03_21-12_01/tables/117847-MESO/HIDDEN-org.cytoscape.model.CyEdge-117847+hidden+edge.cytable
- CytoscapeSession-2021_03_21-12_01/tables/123839-TGCT/org.baderlab.autoannotate.annotationSet-org.cytoscape.model.CyNetwork-org.baderlab.autoannotate.annotationSet.cytable
- CytoscapeSession-2021_03_21-12_01/tables/109659-HNSC/LOCAL_ATTRS-org.cytoscape.model.CyEdge-HNSC+default+edge.cytable
- CytoscapeSession-2021_03_21-12_01/tables/117847-MESO/org.baderlab.autoannotate.cluster-org.cytoscape.model.CyNetwork-org.baderlab.autoannotate.cluster.cytable
- CytoscapeSession-2021_03_21-12_01/tables/105658-Cistrome+Cancer+TF%2DGlycogene+Networks/LOCAL_ATTRS-org.cytoscape.model.CyEdge-105658+default+edge.cytable
- CytoscapeSession-2021_03_21-12_01/tables/118318-PAAD/LOCAL_ATTRS-org.cytoscape.model.CyNode-PAAD+default+node.cytable
- CytoscapeSession-2021_03_21-12_01/tables/107960-COAD_READ/LOCAL_ATTRS-org.cytoscape.model.CyEdge-COAD_READ+default+edge.cytable
- CytoscapeSession-2021_03_21-12_01/tables/124859-THCA/HIDDEN-org.cytoscape.model.CyEdge-124859+hidden+edge.cytable
- CytoscapeSession-2021_03_21-12_01/tables/126090-THYM/LOCAL_ATTRS-org.cytoscape.model.CyNetwork-THYM+default+network.cytable
- CytoscapeSession-2021_03_21-12_01/tables/118033-OV/HIDDEN-org.cytoscape.model.CyNode-118033+hidden+node.cytable
- CytoscapeSession-2021_03_21-12_01/tables/108538-GBM/LOCAL_ATTRS-org.cytoscape.model.CyNode-GBM+default+node.cytable
- CytoscapeSession-2021_03_21-12_01/tables/111080-KIRC/LOCAL_ATTRS-org.cytoscape.model.CyEdge-KIRC+default+edge.cytable
- CytoscapeSession-2021_03_21-12_01/tables/128575-ACC/LOCAL_ATTRS-org.cytoscape.model.CyEdge-ACC+default+edge.cytable
- CytoscapeSession-2021_03_21-12_01/tables/107263-CESC/HIDDEN-org.cytoscape.model.CyNetwork-107263+hidden+network.cytable
- CytoscapeSession-2021_03_21-12_01/tables/112204-KIRP/HIDDEN-org.cytoscape.model.CyNode-112204+hidden+node.cytable
- CytoscapeSession-2021_03_21-12_01/tables/114920-LGG/LOCAL_ATTRS-org.cytoscape.model.CyEdge-LGG+default+edge.cytable
- CytoscapeSession-2021_03_21-12_01/tables/120744-PRAD/HIDDEN-org.cytoscape.model.CyNode-120744+hidden+node.cytable
- CytoscapeSession-2021_03_21-12_01/tables/cytables.xml
- CytoscapeSession-2021_03_21-12_01/session_vizmap.xml
- CytoscapeSession-2021_03_21-12_01/properties/groupSettings.props
- CytoscapeSession-2021_03_21-12_01/properties/session_bookmarks.xml
- CytoscapeSession-2021_03_21-12_01/session_thumbnail.png
- CytoscapeSession-2021_03_21-12_01/apps/org.cytoscape.ding.customgraphicsmgr/2.png
- CytoscapeSession-2021_03_21-12_01/apps/org.cytoscape.ding.customgraphicsmgr/1.png
- CytoscapeSession-2021_03_21-12_01/apps/org.cytoscape.ding.customgraphicsmgr/20.png
- CytoscapeSession-2021_03_21-12_01/apps/org.cytoscape.ding.customgraphicsmgr/image_metadata.props
- CytoscapeSession-2021_03_21-12_01/apps/org.cytoscape.ding.customgraphicsmgr/26.png
- CytoscapeSession-2021_03_21-12_01/apps/org.cytoscape.ding.customgraphicsmgr/31.png
- CytoscapeSession-2021_03_21-12_01/apps/org.cytoscape.ding.customgraphicsmgr/7.png
- CytoscapeSession-2021_03_21-12_01/apps/org.cytoscape.ding.customgraphicsmgr/23.png
- CytoscapeSession-2021_03_21-12_01/apps/org.cytoscape.ding.customgraphicsmgr/25.png
- CytoscapeSession-2021_03_21-12_01/apps/org.cytoscape.ding.customgraphicsmgr/34.png
- CytoscapeSession-2021_03_21-12_01/apps/org.cytoscape.ding.customgraphicsmgr/30.png
- CytoscapeSession-2021_03_21-12_01/apps/org.cytoscape.ding.customgraphicsmgr/8.png
- CytoscapeSession-2021_03_21-12_01/apps/org.cytoscape.ding.customgraphicsmgr/42.png
- CytoscapeSession-2021_03_21-12_01/apps/org.cytoscape.ding.customgraphicsmgr/33.png
- CytoscapeSession-2021_03_21-12_01/apps/org.cytoscape.ding.customgraphicsmgr/29.png
- CytoscapeSession-2021_03_21-12_01/apps/org.cytoscape.ding.customgraphicsmgr/5.png
- CytoscapeSession-2021_03_21-12_01/apps/org.cytoscape.ding.customgraphicsmgr/9.png
- CytoscapeSession-2021_03_21-12_01/apps/org.cytoscape.ding.customgraphicsmgr/24.png
- CytoscapeSession-2021_03_21-12_01/apps/org.cytoscape.ding.customgraphicsmgr/12.png
- CytoscapeSession-2021_03_21-12_01/apps/org.cytoscape.ding.customgraphicsmgr/17.png
- CytoscapeSession-2021_03_21-12_01/apps/org.cytoscape.ding.customgraphicsmgr/22.png
- CytoscapeSession-2021_03_21-12_01/apps/org.cytoscape.ding.customgraphicsmgr/3.png
- CytoscapeSession-2021_03_21-12_01/apps/org.cytoscape.ding.customgraphicsmgr/10.png
[truncated: 22 more entries]
