# Supplementary material for: A systems-based framework to computationally describe putative transcription factors and signaling pathways regulating glycan biosynthesis
Source: publisher site journal article supplement (doi:10.3762/bjoc.17.119), 2021-07-22
Supplement: Additional file 2 [file 1860-5397-17-119-S2.cys › CytoscapeSession-2021_03_21-12_01/networks/105658-Cistrome+Cancer+TF%2DGlycogene+Networks.xgmml]

<?xml version="1.0" encoding="UTF-8" standalone="yes"?>
<graph id="105658" label="Cistrome Cancer TF-Glycogene Networks" cy:view="0" cy:registered="0" cy:documentVersion="3.0" xmlns:dc="http://purl.org/dc/elements/1.1/" xmlns:xlink="http://www.w3.org/1999/xlink" xmlns:rdf="http://www.w3.org/1999/02/22-rdf-syntax-ns#" xmlns:cy="http://www.cytoscape.org" xmlns="http://www.cs.rpi.edu/XGMML">
  <att>
    <graph id="105674" label="Luminal Breast" cy:registered="1">
      <node id="106032" label="C1GALT1C1"/>
      <node id="106031" label="ZBTB33"/>
      <node id="106030" label="B3GALT4"/>
      <node id="106029" label="ZBTB17"/>
      <node id="106028" label="YY1"/>
      <node id="106027" label="GALNT5"/>
      <node id="106026" label="YAP1"/>
      <node id="106025" label="XRN2"/>
      <node id="106024" label="WDR5"/>
      <node id="106023" label="VEZF1"/>
      <node id="106022" label="USF2"/>
      <node id="106021" label="USF1"/>
      <node id="106020" label="UBTF"/>
      <node id="106019" label="TTF2"/>
      <node id="106018" label="TRIM28"/>
      <node id="106017" label="TP63"/>
      <node id="106016" label="TET2"/>
      <node id="106015" label="TERF1"/>
      <node id="106014" label="GALNT1"/>
      <node id="106013" label="TEAD1"/>
      <node id="106012" label="ALG5"/>
      <node id="106011" label="TDRD3"/>
      <node id="106010" label="TCF7L2"/>
      <node id="106009" label="TCF7L1"/>
      <node id="106008" label="TCF7"/>
      <node id="106007" label="TCF12"/>
      <node id="106006" label="TAF1"/>
      <node id="106005" label="COG1"/>
      <node id="106004" label="SUMO2"/>
      <node id="106003" label="STAT5A"/>
      <node id="106002" label="STAT4"/>
      <node id="106001" label="STAT2"/>
      <node id="106000" label="HPSE"/>
      <node id="105999" label="STAT1"/>
      <node id="105998" label="GANAB"/>
      <node id="105997" label="SSRP1"/>
      <node id="105996" label="SRF"/>
      <node id="105995" label="SREBF2"/>
      <node id="105994" label="SRCAP"/>
      <node id="105993" label="SPDEF"/>
      <node id="105992" label="SOX17"/>
      <node id="105991" label="SOX10"/>
      <node id="105990" label="SMC3"/>
      <node id="105989" label="SMC1A"/>
      <node id="105988" label="SMARCC2"/>
      <node id="105987" label="SMAD4"/>
      <node id="105986" label="SIX5"/>
      <node id="105985" label="UGCG"/>
      <node id="105984" label="SIN3A"/>
      <node id="105983" label="RXRA"/>
      <node id="105982" label="RUNX3"/>
      <node id="105981" label="RUNX2"/>
      <node id="105980" label="ST8SIA2"/>
      <node id="105979" label="SULF2"/>
      <node id="105978" label="RUNX1"/>
      <node id="105977" label="RORA"/>
      <node id="105976" label="FPGT"/>
      <node id="105975" label="RNF2"/>
      <node id="105974" label="RFX7"/>
      <node id="105973" label="COG2"/>
      <node id="105972" label="RFX5"/>
      <node id="105971" label="RFX1"/>
      <node id="105970" label="REST"/>
      <node id="105969" label="RCOR1"/>
      <node id="105968" label="RBL2"/>
      <node id="105967" label="RBBP5"/>
      <node id="105966" label="UGGT2"/>
      <node id="105965" label="RB1"/>
      <node id="105964" label="RAC3"/>
      <node id="105963" label="PRKDC"/>
      <node id="105962" label="PRDM1"/>
      <node id="105961" label="PPARG"/>
      <node id="105960" label="POLR3A"/>
      <node id="105959" label="POLR2B"/>
      <node id="105958" label="PIAS1"/>
      <node id="105957" label="PHF6"/>
      <node id="105956" label="PHF20"/>
      <node id="105955" label="PCGF1"/>
      <node id="105954" label="PIGM"/>
      <node id="105953" label="PBX1"/>
      <node id="105952" label="NR5A2"/>
      <node id="105951" label="NR2F1"/>
      <node id="105950" label="SLC35D1"/>
      <node id="105949" label="NR2C2"/>
      <node id="105948" label="NPAT"/>
      <node id="105947" label="NIPBL"/>
      <node id="105946" label="NFYC"/>
      <node id="105945" label="NFIC"/>
      <node id="105944" label="NFATC1"/>
      <node id="105943" label="NFAT5"/>
      <node id="105942" label="MZF1"/>
      <node id="105941" label="HAS3"/>
      <node id="105940" label="SLC35F3"/>
      <node id="105939" label="CHST9"/>
      <node id="105938" label="HS3ST4"/>
      <node id="105937" label="MYH11"/>
      <node id="105936" label="RPN1"/>
      <node id="105935" label="MYBL2"/>
      <node id="105934" label="MYBL1"/>
      <node id="105933" label="MXD3"/>
      <node id="105932" label="MSX1"/>
      <node id="105931" label="MRE11A"/>
      <node id="105930" label="CHST6"/>
      <node id="105929" label="MITF"/>
      <node id="105928" label="MEIS1"/>
      <node id="105927" label="SLC35F1"/>
      <node id="105926" label="MEF2C"/>
      <node id="105925" label="MEF2A"/>
      <node id="105924" label="MED1"/>
      <node id="105923" label="NDST1"/>
      <node id="105922" label="IDS"/>
      <node id="105921" label="MECP2"/>
      <node id="105920" label="ST6GALNAC1"/>
      <node id="105919" label="MECOM"/>
      <node id="105918" label="MGAT4B"/>
      <node id="105917" label="B4GALT2"/>
      <node id="105916" label="MAZ"/>
      <node id="105915" label="MAX"/>
      <node id="105914" label="MAFB"/>
      <node id="105913" label="CHST13"/>
      <node id="105912" label="RENBP"/>
      <node id="105911" label="LYL1"/>
      <node id="105910" label="HS3ST1"/>
      <node id="105909" label="LMO2"/>
      <node id="105908" label="B3GALNT2"/>
      <node id="105907" label="KDM5B"/>
      <node id="105906" label="HS2ST1"/>
      <node id="105905" label="GNS"/>
      <node id="105904" label="KDM5A"/>
      <node id="105903" label="KDM3A"/>
      <node id="105902" label="GNB1"/>
      <node id="105901" label="KDM1A"/>
      <node id="105900" label="KAT5"/>
      <node id="105899" label="JUND"/>
      <node id="105898" label="JUNB"/>
      <node id="105897" label="GBGT1"/>
      <node id="105896" label="FKRP"/>
      <node id="105895" label="JUN"/>
      <node id="105894" label="JMJD6"/>
      <node id="105893" label="MGAT5"/>
      <node id="105892" label="JMJD1C"/>
      <node id="105891" label="JDP2"/>
      <node id="105890" label="IRF8"/>
      <node id="105889" label="IRF5"/>
      <node id="105888" label="IRF4"/>
      <node id="105887" label="IRF1"/>
      <node id="105886" label="INTS3"/>
      <node id="105885" label="INO80"/>
      <node id="105884" label="LIPA"/>
      <node id="105883" label="GM2A"/>
      <node id="105882" label="IKZF1"/>
      <node id="105881" label="GPAA1"/>
      <node id="105880" label="TSTA3"/>
      <node id="105879" label="HSF1"/>
      <node id="105878" label="DPAGT1"/>
      <node id="105877" label="HINFP"/>
      <node id="105876" label="HES4"/>
      <node id="105875" label="HECTD1"/>
      <node id="105874" label="PIGO"/>
      <node id="105873" label="HCFC1"/>
      <node id="105872" label="H2AFX"/>
      <node id="105871" label="GTF2I"/>
      <node id="105870" label="GTF2F1"/>
      <node id="105869" label="CTBS"/>
      <node id="105868" label="GTF2B"/>
      <node id="105867" label="ALG1"/>
      <node id="105866" label="GLYR1"/>
      <node id="105865" label="GLI2"/>
      <node id="105864" label="ALG13"/>
      <node id="105863" label="GATAD1"/>
      <node id="105862" label="GATA6"/>
      <node id="105861" label="GABPA"/>
      <node id="105860" label="NPL"/>
      <node id="105859" label="HK3"/>
      <node id="105858" label="FOXP3"/>
      <node id="105857" label="DSEL"/>
      <node id="105856" label="FOXO1"/>
      <node id="105855" label="GNPNAT1"/>
      <node id="105854" label="RPN2"/>
      <node id="105853" label="FOXM1"/>
      <node id="105852" label="PIGH"/>
      <node id="105851" label="GLCE"/>
      <node id="105850" label="FOXA1"/>
      <node id="105849" label="FOS"/>
      <node id="105848" label="FLI1"/>
      <node id="105847" label="FANCD2"/>
      <node id="105846" label="EZH1"/>
      <node id="105845" label="SLC35B4"/>
      <node id="105844" label="EXTL2"/>
      <node id="105843" label="ARSB"/>
      <node id="105842" label="ETV1"/>
      <node id="105841" label="HS3ST3B1"/>
      <node id="105840" label="ST8SIA1"/>
      <node id="105839" label="ETS1"/>
      <node id="105838" label="CHST2"/>
      <node id="105837" label="SULT1C4"/>
      <node id="105836" label="UST"/>
      <node id="105835" label="CHST7"/>
      <node id="105834" label="ST8SIA4"/>
      <node id="105833" label="CHSY3"/>
      <node id="105832" label="ERG"/>
      <node id="105831" label="ERF"/>
      <node id="105830" label="ERCC6"/>
      <node id="105829" label="EP400"/>
      <node id="105828" label="ELL"/>
      <node id="105827" label="ELK4"/>
      <node id="105826" label="ELK3"/>
      <node id="105825" label="ELF2"/>
      <node id="105824" label="COG6"/>
      <node id="105823" label="COG3"/>
      <node id="105822" label="ELF1"/>
      <node id="105821" label="EHMT2"/>
      <node id="105820" label="UAP1"/>
      <node id="105819" label="EHF"/>
      <node id="105818" label="B3GALT1"/>
      <node id="105817" label="HPSE2"/>
      <node id="105816" label="EGR2"/>
      <node id="105815" label="ST6GALNAC3"/>
      <node id="105814" label="EGR1"/>
      <node id="105813" label="EGLN2"/>
      <node id="105812" label="GALNT12"/>
      <node id="105811" label="ST3GAL6"/>
      <node id="105810" label="FUT4"/>
      <node id="105809" label="TPST1"/>
      <node id="105808" label="B3GALT2"/>
      <node id="105807" label="CHST3"/>
      <node id="105806" label="ST3GAL2"/>
      <node id="105805" label="CSGALNACT1"/>
      <node id="105804" label="EBF1"/>
      <node id="105803" label="E2F7"/>
      <node id="105802" label="FUT1"/>
      <node id="105801" label="E2F6"/>
      <node id="105800" label="KHK"/>
      <node id="105799" label="DPM1"/>
      <node id="105798" label="SLC35B1"/>
      <node id="105797" label="ALG3"/>
      <node id="105796" label="E2F1"/>
      <node id="105795" label="DEK"/>
      <node id="105794" label="CTNNB1"/>
      <node id="105793" label="CTBP1"/>
      <node id="105792" label="POFUT1"/>
      <node id="105791" label="COG7"/>
      <node id="105790" label="CREBBP"/>
      <node id="105789" label="B4GALT3"/>
      <node id="105788" label="CREB3L4"/>
      <node id="105787" label="GMPPA"/>
      <node id="105786" label="CREB3"/>
      <node id="105785" label="CREB1"/>
      <node id="105784" label="B4GALNT4"/>
      <node id="105783" label="POMGNT1"/>
      <node id="105782" label="B4GALT7"/>
      <node id="105781" label="B3GALT6"/>
      <node id="105780" label="CPSF3L"/>
      <node id="105779" label="DSE"/>
      <node id="105778" label="GAL3ST4"/>
      <node id="105777" label="MAN2B1"/>
      <node id="105776" label="LAMP3"/>
      <node id="105775" label="CIITA"/>
      <node id="105774" label="CHD8"/>
      <node id="105773" label="CHD4"/>
      <node id="105772" label="NDST2"/>
      <node id="105771" label="OGT"/>
      <node id="105770" label="CHD2"/>
      <node id="105769" label="CHD1"/>
      <node id="105768" label="A4GALT"/>
      <node id="105767" label="CEBPB"/>
      <node id="105766" label="MFNG"/>
      <node id="105765" label="NAGK"/>
      <node id="105764" label="CEBPA"/>
      <node id="105763" label="CHST12"/>
      <node id="105762" label="MOGS"/>
      <node id="105761" label="POMT1"/>
      <node id="105760" label="MAN1B1"/>
      <node id="105759" label="PIGQ"/>
      <node id="105758" label="DPM2"/>
      <node id="105757" label="CDK9"/>
      <node id="105756" label="CDK8"/>
      <node id="105755" label="CCDC101"/>
      <node id="105754" label="B3GAT3"/>
      <node id="105753" label="GALK1"/>
      <node id="105752" label="CBX8"/>
      <node id="105751" label="HYAL1"/>
      <node id="105750" label="MGAT3"/>
      <node id="105749" label="IDUA"/>
      <node id="105748" label="MAN2A2"/>
      <node id="105747" label="ST3GAL3"/>
      <node id="105746" label="ST6GALNAC6"/>
      <node id="105745" label="CBX7"/>
      <node id="105744" label="RFNG"/>
      <node id="105743" label="CBX4"/>
      <node id="105742" label="CMAS"/>
      <node id="105741" label="CBX3"/>
      <node id="105740" label="GALNS"/>
      <node id="105739" label="CBFB"/>
      <node id="105738" label="CASP8AP2"/>
      <node id="105737" label="HYAL2"/>
      <node id="105736" label="C17orf49"/>
      <node id="105735" label="PMM1"/>
      <node id="105734" label="ALG12"/>
      <node id="105733" label="BRD1"/>
      <node id="105732" label="SLC35E3"/>
      <node id="105731" label="FAM20B"/>
      <node id="105730" label="PIGN"/>
      <node id="105729" label="PIGW"/>
      <node id="105728" label="BRCA1"/>
      <node id="105727" label="ALG10B"/>
      <node id="105726" label="BMI1"/>
      <node id="105725" label="BCAT1"/>
      <node id="105724" label="MGAT1"/>
      <node id="105723" label="BATF3"/>
      <node id="105722" label="DPM3"/>
      <node id="105721" label="BATF"/>
      <node id="105720" label="ST6GAL2"/>
      <node id="105719" label="GFPT2"/>
      <node id="105718" label="CHST11"/>
      <node id="105717" label="CHSY1"/>
      <node id="105716" label="MAN1A1"/>
      <node id="105715" label="CSGALNACT2"/>
      <node id="105714" label="BACH1"/>
      <node id="105713" label="FKTN"/>
      <node id="105712" label="ATRX"/>
      <node id="105711" label="ALG10"/>
      <node id="105710" label="ATF7IP"/>
      <node id="105709" label="HAS2"/>
      <node id="105708" label="HAS1"/>
      <node id="105707" label="B3GNT5"/>
      <node id="105706" label="ATF3"/>
      <node id="105705" label="UGGT1"/>
      <node id="105704" label="ATF2"/>
      <node id="105703" label="GALNT4"/>
      <node id="105702" label="SLC35A5"/>
      <node id="105701" label="ATF1"/>
      <node id="105700" label="RTF1"/>
      <node id="105699" label="ARID2"/>
      <node id="105698" label="ST8SIA6"/>
      <node id="105697" label="GALNT10"/>
      <node id="105696" label="SLC35F5"/>
      <node id="105695" label="SLC35A3"/>
      <node id="105694" label="MAN2A1"/>
      <node id="105693" label="AR"/>
      <node id="105692" label="COG5"/>
      <node id="105691" label="ACER2"/>
      <node id="105690" label="FUT11"/>
      <node id="105689" label="NEU3"/>
      <node id="105688" label="STT3B"/>
      <node id="105687" label="MAN1A2"/>
      <node id="105686" label="AFF4"/>
      <node id="105685" label="FUT7"/>
      <node id="105684" label="ADNP"/>
      <edge id="106824" label="ZBTB33 (interacts with) PIGN" source="106031" target="105730" cy:directed="1"/>
      <edge id="106823" label="ZBTB33 (interacts with) UGGT1" source="106031" target="105705" cy:directed="1"/>
      <edge id="106822" label="ZBTB33 (interacts with) SLC35F5" source="106031" target="105696" cy:directed="1"/>
      <edge id="106821" label="ZBTB33 (interacts with) SLC35A5" source="106031" target="105702" cy:directed="1"/>
      <edge id="106820" label="ZBTB33 (interacts with) SLC35A3" source="106031" target="105695" cy:directed="1"/>
      <edge id="106819" label="ZBTB33 (interacts with) C1GALT1C1" source="106031" target="106032" cy:directed="1"/>
      <edge id="106818" label="ZBTB33 (interacts with) ALG10" source="106031" target="105711" cy:directed="1"/>
      <edge id="106817" label="ZBTB17 (interacts with) HYAL2" source="106029" target="105737" cy:directed="1"/>
      <edge id="106816" label="ZBTB17 (interacts with) B3GALT4" source="106029" target="106030" cy:directed="1"/>
      <edge id="106815" label="ZBTB17 (interacts with) B4GALT2" source="106029" target="105917" cy:directed="1"/>
      <edge id="106814" label="ZBTB17 (interacts with) CHST12" source="106029" target="105763" cy:directed="1"/>
      <edge id="106813" label="ZBTB17 (interacts with) FKRP" source="106029" target="105896" cy:directed="1"/>
      <edge id="106812" label="ZBTB17 (interacts with) GALK1" source="106029" target="105753" cy:directed="1"/>
      <edge id="106811" label="ZBTB17 (interacts with) B4GALT7" source="106029" target="105782" cy:directed="1"/>
      <edge id="106810" label="ZBTB17 (interacts with) POMT1" source="106029" target="105761" cy:directed="1"/>
      <edge id="106809" label="ZBTB17 (interacts with) MOGS" source="106029" target="105762" cy:directed="1"/>
      <edge id="106808" label="ZBTB17 (interacts with) IDUA" source="106029" target="105749" cy:directed="1"/>
      <edge id="106807" label="ZBTB17 (interacts with) DPM3" source="106029" target="105722" cy:directed="1"/>
      <edge id="106806" label="ZBTB17 (interacts with) B3GAT3" source="106029" target="105754" cy:directed="1"/>
      <edge id="106805" label="ZBTB17 (interacts with) PIGQ" source="106029" target="105759" cy:directed="1"/>
      <edge id="106804" label="ZBTB17 (interacts with) B3GALT6" source="106029" target="105781" cy:directed="1"/>
      <edge id="106803" label="ZBTB17 (interacts with) RFNG" source="106029" target="105744" cy:directed="1"/>
      <edge id="106802" label="YY1 (interacts with) GNPNAT1" source="106028" target="105855" cy:directed="1"/>
      <edge id="106801" label="YAP1 (interacts with) GALNT5" source="106026" target="106027" cy:directed="1"/>
      <edge id="106800" label="YAP1 (interacts with) CSGALNACT1" source="106026" target="105805" cy:directed="1"/>
      <edge id="106799" label="YAP1 (interacts with) CHST3" source="106026" target="105807" cy:directed="1"/>
      <edge id="106798" label="YAP1 (interacts with) CHSY1" source="106026" target="105717" cy:directed="1"/>
      <edge id="106797" label="YAP1 (interacts with) DSE" source="106026" target="105779" cy:directed="1"/>
      <edge id="106796" label="YAP1 (interacts with) B3GNT5" source="106026" target="105707" cy:directed="1"/>
      <edge id="106795" label="YAP1 (interacts with) GALNT10" source="106026" target="105697" cy:directed="1"/>
      <edge id="106794" label="XRN2 (interacts with) SLC35A3" source="106025" target="105695" cy:directed="1"/>
      <edge id="106793" label="XRN2 (interacts with) POFUT1" source="106025" target="105792" cy:directed="1"/>
      <edge id="106792" label="XRN2 (interacts with) UGGT1" source="106025" target="105705" cy:directed="1"/>
      <edge id="106791" label="XRN2 (interacts with) NEU3" source="106025" target="105689" cy:directed="1"/>
      <edge id="106790" label="XRN2 (interacts with) MAN1A2" source="106025" target="105687" cy:directed="1"/>
      <edge id="106789" label="XRN2 (interacts with) MAN2A1" source="106025" target="105694" cy:directed="1"/>
      <edge id="106788" label="XRN2 (interacts with) STT3B" source="106025" target="105688" cy:directed="1"/>
      <edge id="106787" label="WDR5 (interacts with) MAN1B1" source="106024" target="105760" cy:directed="1"/>
      <edge id="106786" label="WDR5 (interacts with) POMT1" source="106024" target="105761" cy:directed="1"/>
      <edge id="106785" label="WDR5 (interacts with) DPM2" source="106024" target="105758" cy:directed="1"/>
      <edge id="106784" label="VEZF1 (interacts with) FPGT" source="106023" target="105976" cy:directed="1"/>
      <edge id="106783" label="VEZF1 (interacts with) SLC35E3" source="106023" target="105732" cy:directed="1"/>
      <edge id="106782" label="VEZF1 (interacts with) PIGN" source="106023" target="105730" cy:directed="1"/>
      <edge id="106781" label="VEZF1 (interacts with) GNS" source="106023" target="105905" cy:directed="1"/>
      <edge id="106780" label="VEZF1 (interacts with) FKTN" source="106023" target="105713" cy:directed="1"/>
      <edge id="106779" label="VEZF1 (interacts with) UGCG" source="106023" target="105985" cy:directed="1"/>
      <edge id="106778" label="VEZF1 (interacts with) ALG10" source="106023" target="105711" cy:directed="1"/>
      <edge id="106777" label="VEZF1 (interacts with) ALG10B" source="106023" target="105727" cy:directed="1"/>
      <edge id="106776" label="USF2 (interacts with) B4GALNT4" source="106022" target="105784" cy:directed="1"/>
      <edge id="106775" label="USF2 (interacts with) MOGS" source="106022" target="105762" cy:directed="1"/>
      <edge id="106774" label="USF2 (interacts with) B3GAT3" source="106022" target="105754" cy:directed="1"/>
      <edge id="106773" label="USF2 (interacts with) RFNG" source="106022" target="105744" cy:directed="1"/>
      <edge id="106772" label="USF2 (interacts with) B3GALT6" source="106022" target="105781" cy:directed="1"/>
      <edge id="106771" label="USF2 (interacts with) IDUA" source="106022" target="105749" cy:directed="1"/>
      <edge id="106770" label="USF2 (interacts with) DPM3" source="106022" target="105722" cy:directed="1"/>
      <edge id="106769" label="USF1 (interacts with) IDUA" source="106021" target="105749" cy:directed="1"/>
      <edge id="106768" label="USF1 (interacts with) B4GALT3" source="106021" target="105789" cy:directed="1"/>
      <edge id="106767" label="USF1 (interacts with) DPM3" source="106021" target="105722" cy:directed="1"/>
      <edge id="106766" label="UBTF (interacts with) B4GALNT4" source="106020" target="105784" cy:directed="1"/>
      <edge id="106765" label="TTF2 (interacts with) PIGW" source="106019" target="105729" cy:directed="1"/>
      <edge id="106764" label="TTF2 (interacts with) MAN1A2" source="106019" target="105687" cy:directed="1"/>
      <edge id="106763" label="TRIM28 (interacts with) B4GALNT4" source="106018" target="105784" cy:directed="1"/>
      <edge id="106762" label="TRIM28 (interacts with) B3GAT3" source="106018" target="105754" cy:directed="1"/>
      <edge id="106761" label="TRIM28 (interacts with) GALK1" source="106018" target="105753" cy:directed="1"/>
      <edge id="106760" label="TRIM28 (interacts with) B4GALT7" source="106018" target="105782" cy:directed="1"/>
      <edge id="106759" label="TRIM28 (interacts with) B4GALT2" source="106018" target="105917" cy:directed="1"/>
      <edge id="106758" label="TRIM28 (interacts with) GPAA1" source="106018" target="105881" cy:directed="1"/>
      <edge id="106757" label="TP63 (interacts with) ST8SIA2" source="106017" target="105980" cy:directed="1"/>
      <edge id="106756" label="TP63 (interacts with) CHST3" source="106017" target="105807" cy:directed="1"/>
      <edge id="106755" label="TP63 (interacts with) B3GNT5" source="106017" target="105707" cy:directed="1"/>
      <edge id="106754" label="TP63 (interacts with) HAS3" source="106017" target="105941" cy:directed="1"/>
      <edge id="106753" label="TET2 (interacts with) ALG10" source="106016" target="105711" cy:directed="1"/>
      <edge id="106752" label="TET2 (interacts with) CSGALNACT2" source="106016" target="105715" cy:directed="1"/>
      <edge id="106751" label="TET2 (interacts with) SLC35A3" source="106016" target="105695" cy:directed="1"/>
      <edge id="106750" label="TET2 (interacts with) SLC35D1" source="106016" target="105950" cy:directed="1"/>
      <edge id="106749" label="TET2 (interacts with) ACER2" source="106016" target="105691" cy:directed="1"/>
      <edge id="106748" label="TET2 (interacts with) FUT11" source="106016" target="105690" cy:directed="1"/>
      <edge id="106747" label="TET2 (interacts with) COG5" source="106016" target="105692" cy:directed="1"/>
      <edge id="106746" label="TET2 (interacts with) STT3B" source="106016" target="105688" cy:directed="1"/>
      <edge id="106745" label="TET2 (interacts with) MAN1A2" source="106016" target="105687" cy:directed="1"/>
      <edge id="106744" label="TERF1 (interacts with) PIGW" source="106015" target="105729" cy:directed="1"/>
      <edge id="106743" label="TEAD1 (interacts with) DSEL" source="106013" target="105857" cy:directed="1"/>
      <edge id="106742" label="TEAD1 (interacts with) GALNT1" source="106013" target="106014" cy:directed="1"/>
      <edge id="106741" label="TEAD1 (interacts with) DSE" source="106013" target="105779" cy:directed="1"/>
      <edge id="106740" label="TEAD1 (interacts with) SLC35D1" source="106013" target="105950" cy:directed="1"/>
      <edge id="106739" label="TEAD1 (interacts with) EXTL2" source="106013" target="105844" cy:directed="1"/>
      <edge id="106738" label="TEAD1 (interacts with) FUT11" source="106013" target="105690" cy:directed="1"/>
      <edge id="106737" label="TEAD1 (interacts with) CSGALNACT2" source="106013" target="105715" cy:directed="1"/>
      <edge id="106736" label="TDRD3 (interacts with) ALG5" source="106011" target="106012" cy:directed="1"/>
      <edge id="106735" label="TDRD3 (interacts with) COG6" source="106011" target="105824" cy:directed="1"/>
      <edge id="106734" label="TCF7L2 (interacts with) ST8SIA2" source="106010" target="105980" cy:directed="1"/>
      <edge id="106733" label="TCF7L2 (interacts with) GFPT2" source="106010" target="105719" cy:directed="1"/>
      <edge id="106732" label="TCF7L2 (interacts with) ST8SIA1" source="106010" target="105840" cy:directed="1"/>
      <edge id="106731" label="TCF7L2 (interacts with) CSGALNACT1" source="106010" target="105805" cy:directed="1"/>
      <edge id="106730" label="TCF7L2 (interacts with) CHST3" source="106010" target="105807" cy:directed="1"/>
      <edge id="106729" label="TCF7L1 (interacts with) GBGT1" source="106009" target="105897" cy:directed="1"/>
      <edge id="106728" label="TCF7L1 (interacts with) ST8SIA1" source="106009" target="105840" cy:directed="1"/>
      <edge id="106727" label="TCF7L1 (interacts with) MFNG" source="106009" target="105766" cy:directed="1"/>
      <edge id="106726" label="TCF7L1 (interacts with) CHST3" source="106009" target="105807" cy:directed="1"/>
      <edge id="106725" label="TCF7L1 (interacts with) TPST1" source="106009" target="105809" cy:directed="1"/>
      <edge id="106724" label="TCF7 (interacts with) CHST3" source="106008" target="105807" cy:directed="1"/>
      <edge id="106723" label="TCF7 (interacts with) FUT4" source="106008" target="105810" cy:directed="1"/>
      <edge id="106722" label="TCF7 (interacts with) ST8SIA1" source="106008" target="105840" cy:directed="1"/>
      <edge id="106721" label="TCF7 (interacts with) LAMP3" source="106008" target="105776" cy:directed="1"/>
      <edge id="106720" label="TCF7 (interacts with) MFNG" source="106008" target="105766" cy:directed="1"/>
      <edge id="106719" label="TCF12 (interacts with) CSGALNACT2" source="106007" target="105715" cy:directed="1"/>
      <edge id="106718" label="TCF12 (interacts with) FUT11" source="106007" target="105690" cy:directed="1"/>
      <edge id="106717" label="TAF1 (interacts with) ACER2" source="106006" target="105691" cy:directed="1"/>
      <edge id="106716" label="TAF1 (interacts with) FUT11" source="106006" target="105690" cy:directed="1"/>
      <edge id="106715" label="TAF1 (interacts with) MAN1A2" source="106006" target="105687" cy:directed="1"/>
      <edge id="106714" label="TAF1 (interacts with) NEU3" source="106006" target="105689" cy:directed="1"/>
      <edge id="106713" label="SUMO2 (interacts with) COG1" source="106004" target="106005" cy:directed="1"/>
      <edge id="106712" label="SUMO2 (interacts with) SLC35B1" source="106004" target="105798" cy:directed="1"/>
      <edge id="106711" label="STAT5A (interacts with) CHST2" source="106003" target="105838" cy:directed="1"/>
      <edge id="106710" label="STAT5A (interacts with) MGAT3" source="106003" target="105750" cy:directed="1"/>
      <edge id="106709" label="STAT5A (interacts with) ST6GALNAC6" source="106003" target="105746" cy:directed="1"/>
      <edge id="106708" label="STAT5A (interacts with) GBGT1" source="106003" target="105897" cy:directed="1"/>
      <edge id="106707" label="STAT5A (interacts with) MFNG" source="106003" target="105766" cy:directed="1"/>
      <edge id="106706" label="STAT4 (interacts with) CHST2" source="106002" target="105838" cy:directed="1"/>
      <edge id="106705" label="STAT4 (interacts with) CHST11" source="106002" target="105718" cy:directed="1"/>
      <edge id="106704" label="STAT4 (interacts with) ST8SIA1" source="106002" target="105840" cy:directed="1"/>
      <edge id="106703" label="STAT4 (interacts with) MFNG" source="106002" target="105766" cy:directed="1"/>
      <edge id="106702" label="STAT4 (interacts with) ST8SIA4" source="106002" target="105834" cy:directed="1"/>
      <edge id="106701" label="STAT4 (interacts with) FUT7" source="106002" target="105685" cy:directed="1"/>
      <edge id="106700" label="STAT2 (interacts with) HPSE" source="106001" target="106000" cy:directed="1"/>
      <edge id="106699" label="STAT2 (interacts with) CHST11" source="106001" target="105718" cy:directed="1"/>
      <edge id="106698" label="STAT2 (interacts with) GAL3ST4" source="106001" target="105778" cy:directed="1"/>
      <edge id="106697" label="STAT2 (interacts with) LAMP3" source="106001" target="105776" cy:directed="1"/>
      <edge id="106696" label="STAT1 (interacts with) NPL" source="105999" target="105860" cy:directed="1"/>
      <edge id="106695" label="STAT1 (interacts with) HPSE" source="105999" target="106000" cy:directed="1"/>
      <edge id="106694" label="STAT1 (interacts with) ST8SIA4" source="105999" target="105834" cy:directed="1"/>
      <edge id="106693" label="STAT1 (interacts with) LAMP3" source="105999" target="105776" cy:directed="1"/>
      <edge id="106692" label="SSRP1 (interacts with) GANAB" source="105997" target="105998" cy:directed="1"/>
      <edge id="106691" label="SRF (interacts with) HYAL2" source="105996" target="105737" cy:directed="1"/>
      <edge id="106690" label="SRF (interacts with) MFNG" source="105996" target="105766" cy:directed="1"/>
      <edge id="106689" label="SRF (interacts with) HAS1" source="105996" target="105708" cy:directed="1"/>
      <edge id="106688" label="SRF (interacts with) MGAT3" source="105996" target="105750" cy:directed="1"/>
      <edge id="106687" label="SRF (interacts with) CHST2" source="105996" target="105838" cy:directed="1"/>
      <edge id="106686" label="SREBF2 (interacts with) ALG12" source="105995" target="105734" cy:directed="1"/>
      <edge id="106685" label="SRCAP (interacts with) COG7" source="105994" target="105791" cy:directed="1"/>
      <edge id="106684" label="SPDEF (interacts with) DPM2" source="105993" target="105758" cy:directed="1"/>
      <edge id="106683" label="SOX17 (interacts with) ST3GAL3" source="105992" target="105747" cy:directed="1"/>
      <edge id="106682" label="SOX17 (interacts with) CHST12" source="105992" target="105763" cy:directed="1"/>
      <edge id="106681" label="SOX17 (interacts with) GBGT1" source="105992" target="105897" cy:directed="1"/>
      <edge id="106680" label="SOX17 (interacts with) CHST3" source="105992" target="105807" cy:directed="1"/>
      <edge id="106679" label="SOX17 (interacts with) ST3GAL2" source="105992" target="105806" cy:directed="1"/>
      <edge id="106678" label="SOX17 (interacts with) ST6GALNAC1" source="105992" target="105920" cy:directed="1"/>
      <edge id="106677" label="SOX17 (interacts with) MGAT3" source="105992" target="105750" cy:directed="1"/>
      <edge id="106676" label="SOX17 (interacts with) HYAL1" source="105992" target="105751" cy:directed="1"/>
      <edge id="106675" label="SOX17 (interacts with) CSGALNACT1" source="105992" target="105805" cy:directed="1"/>
      <edge id="106674" label="SOX17 (interacts with) ST6GALNAC3" source="105992" target="105815" cy:directed="1"/>
      <edge id="106673" label="SOX17 (interacts with) HYAL2" source="105992" target="105737" cy:directed="1"/>
      <edge id="106672" label="SOX10 (interacts with) CHST3" source="105991" target="105807" cy:directed="1"/>
      <edge id="106671" label="SMC3 (interacts with) UGGT1" source="105990" target="105705" cy:directed="1"/>
      <edge id="106670" label="SMC3 (interacts with) UGCG" source="105990" target="105985" cy:directed="1"/>
      <edge id="106669" label="SMC3 (interacts with) FAM20B" source="105990" target="105731" cy:directed="1"/>
      <edge id="106668" label="SMC3 (interacts with) SLC35A5" source="105990" target="105702" cy:directed="1"/>
      <edge id="106667" label="SMC3 (interacts with) PIGN" source="105990" target="105730" cy:directed="1"/>
      <edge id="106666" label="SMC3 (interacts with) FKTN" source="105990" target="105713" cy:directed="1"/>
      <edge id="106665" label="SMC3 (interacts with) FUT11" source="105990" target="105690" cy:directed="1"/>
      <edge id="106664" label="SMC3 (interacts with) STT3B" source="105990" target="105688" cy:directed="1"/>
      <edge id="106663" label="SMC1A (interacts with) PIGW" source="105989" target="105729" cy:directed="1"/>
      <edge id="106662" label="SMC1A (interacts with) UGGT1" source="105989" target="105705" cy:directed="1"/>
      <edge id="106661" label="SMC1A (interacts with) MAN1A2" source="105989" target="105687" cy:directed="1"/>
      <edge id="106660" label="SMC1A (interacts with) STT3B" source="105989" target="105688" cy:directed="1"/>
      <edge id="106659" label="SMC1A (interacts with) NEU3" source="105989" target="105689" cy:directed="1"/>
      <edge id="106658" label="SMARCC2 (interacts with) OGT" source="105988" target="105771" cy:directed="1"/>
      <edge id="106657" label="SMAD4 (interacts with) GLCE" source="105987" target="105851" cy:directed="1"/>
      <edge id="106656" label="SMAD4 (interacts with) ALG10B" source="105987" target="105727" cy:directed="1"/>
      <edge id="106655" label="SIX5 (interacts with) HYAL2" source="105986" target="105737" cy:directed="1"/>
      <edge id="106654" label="SIX5 (interacts with) DPM3" source="105986" target="105722" cy:directed="1"/>
      <edge id="106653" label="SIX5 (interacts with) B4GALT7" source="105986" target="105782" cy:directed="1"/>
      <edge id="106652" label="SIX5 (interacts with) MOGS" source="105986" target="105762" cy:directed="1"/>
      <edge id="106651" label="SIX5 (interacts with) RFNG" source="105986" target="105744" cy:directed="1"/>
      <edge id="106650" label="SIX5 (interacts with) B3GALT6" source="105986" target="105781" cy:directed="1"/>
      <edge id="106649" label="SIX5 (interacts with) PIGQ" source="105986" target="105759" cy:directed="1"/>
      <edge id="106648" label="SIN3A (interacts with) ALG10B" source="105984" target="105727" cy:directed="1"/>
      <edge id="106647" label="SIN3A (interacts with) FKTN" source="105984" target="105713" cy:directed="1"/>
      <edge id="106646" label="SIN3A (interacts with) UGCG" source="105984" target="105985" cy:directed="1"/>
      <edge id="106645" label="SIN3A (interacts with) ACER2" source="105984" target="105691" cy:directed="1"/>
      <edge id="106644" label="SIN3A (interacts with) MAN1A2" source="105984" target="105687" cy:directed="1"/>
      <edge id="106643" label="SIN3A (interacts with) PIGN" source="105984" target="105730" cy:directed="1"/>
      <edge id="106642" label="SIN3A (interacts with) RTF1" source="105984" target="105700" cy:directed="1"/>
      <edge id="106641" label="RXRA (interacts with) ST6GALNAC6" source="105983" target="105746" cy:directed="1"/>
      <edge id="106640" label="RXRA (interacts with) POMT1" source="105983" target="105761" cy:directed="1"/>
      <edge id="106639" label="RXRA (interacts with) NDST1" source="105983" target="105923" cy:directed="1"/>
      <edge id="106638" label="RUNX3 (interacts with) FUT4" source="105982" target="105810" cy:directed="1"/>
      <edge id="106637" label="RUNX3 (interacts with) CHST11" source="105982" target="105718" cy:directed="1"/>
      <edge id="106636" label="RUNX2 (interacts with) CHST3" source="105981" target="105807" cy:directed="1"/>
      <edge id="106635" label="RUNX2 (interacts with) TPST1" source="105981" target="105809" cy:directed="1"/>
      <edge id="106634" label="RUNX2 (interacts with) SULF2" source="105981" target="105979" cy:directed="1"/>
      <edge id="106633" label="RUNX1 (interacts with) ST8SIA2" source="105978" target="105980" cy:directed="1"/>
      <edge id="106632" label="RUNX1 (interacts with) SULF2" source="105978" target="105979" cy:directed="1"/>
      <edge id="106631" label="RUNX1 (interacts with) CHSY3" source="105978" target="105833" cy:directed="1"/>
      <edge id="106630" label="RUNX1 (interacts with) CHST3" source="105978" target="105807" cy:directed="1"/>
      <edge id="106629" label="RUNX1 (interacts with) CHSY1" source="105978" target="105717" cy:directed="1"/>
      <edge id="106628" label="RORA (interacts with) DSE" source="105977" target="105779" cy:directed="1"/>
      <edge id="106627" label="RNF2 (interacts with) COG2" source="105975" target="105973" cy:directed="1"/>
      <edge id="106626" label="RNF2 (interacts with) FPGT" source="105975" target="105976" cy:directed="1"/>
      <edge id="106625" label="RFX7 (interacts with) NEU3" source="105974" target="105689" cy:directed="1"/>
      <edge id="106624" label="RFX5 (interacts with) COG2" source="105972" target="105973" cy:directed="1"/>
      <edge id="106623" label="RFX1 (interacts with) HYAL2" source="105971" target="105737" cy:directed="1"/>
      <edge id="106622" label="RFX1 (interacts with) MOGS" source="105971" target="105762" cy:directed="1"/>
      <edge id="106621" label="REST (interacts with) FUT11" source="105970" target="105690" cy:directed="1"/>
      <edge id="106620" label="RCOR1 (interacts with) ACER2" source="105969" target="105691" cy:directed="1"/>
      <edge id="106619" label="RCOR1 (interacts with) NEU3" source="105969" target="105689" cy:directed="1"/>
      <edge id="106618" label="RCOR1 (interacts with) FKTN" source="105969" target="105713" cy:directed="1"/>
      <edge id="106617" label="RBL2 (interacts with) GNS" source="105968" target="105905" cy:directed="1"/>
      <edge id="106616" label="RBL2 (interacts with) MAN1A2" source="105968" target="105687" cy:directed="1"/>
      <edge id="106615" label="RBL2 (interacts with) SLC35A5" source="105968" target="105702" cy:directed="1"/>
      <edge id="106614" label="RBL2 (interacts with) ALG10B" source="105968" target="105727" cy:directed="1"/>
      <edge id="106613" label="RBBP5 (interacts with) B3GALNT2" source="105967" target="105908" cy:directed="1"/>
      <edge id="106612" label="RBBP5 (interacts with) STT3B" source="105967" target="105688" cy:directed="1"/>
      <edge id="106611" label="RBBP5 (interacts with) PIGN" source="105967" target="105730" cy:directed="1"/>
      <edge id="106610" label="RBBP5 (interacts with) SLC35A3" source="105967" target="105695" cy:directed="1"/>
      <edge id="106609" label="RBBP5 (interacts with) UGGT1" source="105967" target="105705" cy:directed="1"/>
      <edge id="106608" label="RBBP5 (interacts with) FUT11" source="105967" target="105690" cy:directed="1"/>
      <edge id="106607" label="RBBP5 (interacts with) COG5" source="105967" target="105692" cy:directed="1"/>
      <edge id="106606" label="RBBP5 (interacts with) FAM20B" source="105967" target="105731" cy:directed="1"/>
      <edge id="106605" label="RBBP5 (interacts with) MAN1A2" source="105967" target="105687" cy:directed="1"/>
      <edge id="106604" label="RB1 (interacts with) UGGT2" source="105965" target="105966" cy:directed="1"/>
      <edge id="106603" label="RB1 (interacts with) SLC35A5" source="105965" target="105702" cy:directed="1"/>
      <edge id="106602" label="RB1 (interacts with) COG3" source="105965" target="105823" cy:directed="1"/>
      <edge id="106601" label="RB1 (interacts with) COG6" source="105965" target="105824" cy:directed="1"/>
      <edge id="106600" label="RAC3 (interacts with) GALK1" source="105964" target="105753" cy:directed="1"/>
      <edge id="106599" label="PRKDC (interacts with) PIGW" source="105963" target="105729" cy:directed="1"/>
      <edge id="106598" label="PRKDC (interacts with) SLC35A3" source="105963" target="105695" cy:directed="1"/>
      <edge id="106597" label="PRKDC (interacts with) POFUT1" source="105963" target="105792" cy:directed="1"/>
      <edge id="106596" label="PRKDC (interacts with) PIGN" source="105963" target="105730" cy:directed="1"/>
      <edge id="106595" label="PRKDC (interacts with) FUT11" source="105963" target="105690" cy:directed="1"/>
      <edge id="106594" label="PRKDC (interacts with) ALG10" source="105963" target="105711" cy:directed="1"/>
      <edge id="106593" label="PRDM1 (interacts with) UST" source="105962" target="105836" cy:directed="1"/>
      <edge id="106592" label="PRDM1 (interacts with) SLC35B4" source="105962" target="105845" cy:directed="1"/>
      <edge id="106591" label="PRDM1 (interacts with) ST6GAL2" source="105962" target="105720" cy:directed="1"/>
      <edge id="106590" label="PRDM1 (interacts with) B3GNT5" source="105962" target="105707" cy:directed="1"/>
      <edge id="106589" label="PRDM1 (interacts with) B3GALT2" source="105962" target="105808" cy:directed="1"/>
      <edge id="106588" label="PRDM1 (interacts with) FUT4" source="105962" target="105810" cy:directed="1"/>
      <edge id="106587" label="PRDM1 (interacts with) HAS2" source="105962" target="105709" cy:directed="1"/>
      <edge id="106586" label="PRDM1 (interacts with) CSGALNACT1" source="105962" target="105805" cy:directed="1"/>
      <edge id="106585" label="PRDM1 (interacts with) DSE" source="105962" target="105779" cy:directed="1"/>
      <edge id="106584" label="PPARG (interacts with) CSGALNACT1" source="105961" target="105805" cy:directed="1"/>
      <edge id="106583" label="PPARG (interacts with) B3GNT5" source="105961" target="105707" cy:directed="1"/>
      <edge id="106582" label="PPARG (interacts with) MGAT3" source="105961" target="105750" cy:directed="1"/>
      <edge id="106581" label="PPARG (interacts with) MFNG" source="105961" target="105766" cy:directed="1"/>
      <edge id="106580" label="PPARG (interacts with) ST6GALNAC1" source="105961" target="105920" cy:directed="1"/>
      <edge id="106579" label="PPARG (interacts with) CHST7" source="105961" target="105835" cy:directed="1"/>
      <edge id="106578" label="POLR3A (interacts with) NEU3" source="105960" target="105689" cy:directed="1"/>
      <edge id="106577" label="POLR3A (interacts with) MGAT5" source="105960" target="105893" cy:directed="1"/>
      <edge id="106576" label="POLR2B (interacts with) MAN2A1" source="105959" target="105694" cy:directed="1"/>
      <edge id="106575" label="POLR2B (interacts with) MAN1A2" source="105959" target="105687" cy:directed="1"/>
      <edge id="106574" label="PIAS1 (interacts with) SLC35F5" source="105958" target="105696" cy:directed="1"/>
      <edge id="106573" label="PIAS1 (interacts with) SLC35A5" source="105958" target="105702" cy:directed="1"/>
      <edge id="106572" label="PIAS1 (interacts with) COG5" source="105958" target="105692" cy:directed="1"/>
      <edge id="106571" label="PIAS1 (interacts with) FKTN" source="105958" target="105713" cy:directed="1"/>
      <edge id="106570" label="PIAS1 (interacts with) SLC35A3" source="105958" target="105695" cy:directed="1"/>
      <edge id="106569" label="PIAS1 (interacts with) ALG10" source="105958" target="105711" cy:directed="1"/>
      <edge id="106568" label="PIAS1 (interacts with) FUT11" source="105958" target="105690" cy:directed="1"/>
      <edge id="106567" label="PIAS1 (interacts with) ACER2" source="105958" target="105691" cy:directed="1"/>
      <edge id="106566" label="PIAS1 (interacts with) MGAT5" source="105958" target="105893" cy:directed="1"/>
      <edge id="106565" label="PHF6 (interacts with) SLC35F5" source="105957" target="105696" cy:directed="1"/>
      <edge id="106564" label="PHF6 (interacts with) FAM20B" source="105957" target="105731" cy:directed="1"/>
      <edge id="106563" label="PHF20 (interacts with) SLC35A3" source="105956" target="105695" cy:directed="1"/>
      <edge id="106562" label="PHF20 (interacts with) POFUT1" source="105956" target="105792" cy:directed="1"/>
      <edge id="106561" label="PCGF1 (interacts with) RFNG" source="105955" target="105744" cy:directed="1"/>
      <edge id="106560" label="PBX1 (interacts with) UGGT1" source="105953" target="105705" cy:directed="1"/>
      <edge id="106559" label="PBX1 (interacts with) STT3B" source="105953" target="105688" cy:directed="1"/>
      <edge id="106558" label="PBX1 (interacts with) PIGM" source="105953" target="105954" cy:directed="1"/>
      <edge id="106557" label="PBX1 (interacts with) FAM20B" source="105953" target="105731" cy:directed="1"/>
      <edge id="106556" label="PBX1 (interacts with) MAN1A2" source="105953" target="105687" cy:directed="1"/>
      <edge id="106555" label="NR5A2 (interacts with) B3GNT5" source="105952" target="105707" cy:directed="1"/>
      <edge id="106554" label="NR5A2 (interacts with) SULT1C4" source="105952" target="105837" cy:directed="1"/>
      <edge id="106553" label="NR5A2 (interacts with) CSGALNACT1" source="105952" target="105805" cy:directed="1"/>
      <edge id="106552" label="NR5A2 (interacts with) ST8SIA4" source="105952" target="105834" cy:directed="1"/>
      <edge id="106551" label="NR5A2 (interacts with) ST6GALNAC3" source="105952" target="105815" cy:directed="1"/>
      <edge id="106550" label="NR2F1 (interacts with) DSE" source="105951" target="105779" cy:directed="1"/>
      <edge id="106549" label="NR2F1 (interacts with) ST3GAL2" source="105951" target="105806" cy:directed="1"/>
      <edge id="106548" label="NR2F1 (interacts with) CHST3" source="105951" target="105807" cy:directed="1"/>
      <edge id="106547" label="NR2C2 (interacts with) UGGT1" source="105949" target="105705" cy:directed="1"/>
      <edge id="106546" label="NR2C2 (interacts with) SLC35B4" source="105949" target="105845" cy:directed="1"/>
      <edge id="106545" label="NR2C2 (interacts with) SLC35D1" source="105949" target="105950" cy:directed="1"/>
      <edge id="106544" label="NR2C2 (interacts with) COG3" source="105949" target="105823" cy:directed="1"/>
      <edge id="106543" label="NR2C2 (interacts with) FAM20B" source="105949" target="105731" cy:directed="1"/>
      <edge id="106542" label="NR2C2 (interacts with) FUT11" source="105949" target="105690" cy:directed="1"/>
      <edge id="106541" label="NR2C2 (interacts with) ALG10B" source="105949" target="105727" cy:directed="1"/>
      <edge id="106540" label="NR2C2 (interacts with) OGT" source="105949" target="105771" cy:directed="1"/>
      <edge id="106539" label="NR2C2 (interacts with) FKTN" source="105949" target="105713" cy:directed="1"/>
      <edge id="106538" label="NR2C2 (interacts with) STT3B" source="105949" target="105688" cy:directed="1"/>
      <edge id="106537" label="NPAT (interacts with) FUT11" source="105948" target="105690" cy:directed="1"/>
      <edge id="106536" label="NIPBL (interacts with) FUT11" source="105947" target="105690" cy:directed="1"/>
      <edge id="106535" label="NIPBL (interacts with) NEU3" source="105947" target="105689" cy:directed="1"/>
      <edge id="106534" label="NFYC (interacts with) ST3GAL3" source="105946" target="105747" cy:directed="1"/>
      <edge id="106533" label="NFIC (interacts with) MGAT5" source="105945" target="105893" cy:directed="1"/>
      <edge id="106532" label="NFATC1 (interacts with) MFNG" source="105944" target="105766" cy:directed="1"/>
      <edge id="106531" label="NFAT5 (interacts with) ACER2" source="105943" target="105691" cy:directed="1"/>
      <edge id="106530" label="MZF1 (interacts with) B4GALNT4" source="105942" target="105784" cy:directed="1"/>
      <edge id="106529" label="MZF1 (interacts with) DPM3" source="105942" target="105722" cy:directed="1"/>
      <edge id="106528" label="MZF1 (interacts with) MOGS" source="105942" target="105762" cy:directed="1"/>
      <edge id="106527" label="MZF1 (interacts with) FKRP" source="105942" target="105896" cy:directed="1"/>
      <edge id="106526" label="MYH11 (interacts with) HAS3" source="105937" target="105941" cy:directed="1"/>
      <edge id="106525" label="MYH11 (interacts with) SULT1C4" source="105937" target="105837" cy:directed="1"/>
      <edge id="106524" label="MYH11 (interacts with) SLC35F3" source="105937" target="105940" cy:directed="1"/>
      <edge id="106523" label="MYH11 (interacts with) B3GALT1" source="105937" target="105818" cy:directed="1"/>
      <edge id="106522" label="MYH11 (interacts with) CHST9" source="105937" target="105939" cy:directed="1"/>
      <edge id="106521" label="MYH11 (interacts with) HS3ST4" source="105937" target="105938" cy:directed="1"/>
      <edge id="106520" label="MYH11 (interacts with) CHST7" source="105937" target="105835" cy:directed="1"/>
      <edge id="106519" label="MYH11 (interacts with) CHST2" source="105937" target="105838" cy:directed="1"/>
      <edge id="106518" label="MYH11 (interacts with) ST6GALNAC3" source="105937" target="105815" cy:directed="1"/>
      <edge id="106517" label="MYH11 (interacts with) HPSE2" source="105937" target="105817" cy:directed="1"/>
      <edge id="106516" label="MYH11 (interacts with) CHST3" source="105937" target="105807" cy:directed="1"/>
      <edge id="106515" label="MYBL2 (interacts with) SLC35B1" source="105935" target="105798" cy:directed="1"/>
      <edge id="106514" label="MYBL2 (interacts with) DPM1" source="105935" target="105799" cy:directed="1"/>
      <edge id="106513" label="MYBL2 (interacts with) ALG3" source="105935" target="105797" cy:directed="1"/>
      <edge id="106512" label="MYBL2 (interacts with) RPN1" source="105935" target="105936" cy:directed="1"/>
      <edge id="106511" label="MYBL2 (interacts with) RPN2" source="105935" target="105854" cy:directed="1"/>
      <edge id="106510" label="MYBL1 (interacts with) PIGW" source="105934" target="105729" cy:directed="1"/>
      <edge id="106509" label="MXD3 (interacts with) MOGS" source="105933" target="105762" cy:directed="1"/>
      <edge id="106508" label="MSX1 (interacts with) A4GALT" source="105932" target="105768" cy:directed="1"/>
      <edge id="106507" label="MSX1 (interacts with) ST3GAL2" source="105932" target="105806" cy:directed="1"/>
      <edge id="106506" label="MRE11A (interacts with) NEU3" source="105931" target="105689" cy:directed="1"/>
      <edge id="106505" label="MITF (interacts with) UST" source="105929" target="105836" cy:directed="1"/>
      <edge id="106504" label="MITF (interacts with) CHST6" source="105929" target="105930" cy:directed="1"/>
      <edge id="106503" label="MITF (interacts with) GFPT2" source="105929" target="105719" cy:directed="1"/>
      <edge id="106502" label="MITF (interacts with) ARSB" source="105929" target="105843" cy:directed="1"/>
      <edge id="106501" label="MITF (interacts with) CSGALNACT1" source="105929" target="105805" cy:directed="1"/>
      <edge id="106500" label="MITF (interacts with) ST3GAL6" source="105929" target="105811" cy:directed="1"/>
      <edge id="106499" label="MITF (interacts with) GAL3ST4" source="105929" target="105778" cy:directed="1"/>
      <edge id="106498" label="MEIS1 (interacts with) CSGALNACT1" source="105928" target="105805" cy:directed="1"/>
      <edge id="106497" label="MEIS1 (interacts with) CHST3" source="105928" target="105807" cy:directed="1"/>
      <edge id="106496" label="MEF2C (interacts with) CHST3" source="105926" target="105807" cy:directed="1"/>
      <edge id="106495" label="MEF2C (interacts with) MGAT3" source="105926" target="105750" cy:directed="1"/>
      <edge id="106494" label="MEF2C (interacts with) UST" source="105926" target="105836" cy:directed="1"/>
      <edge id="106493" label="MEF2C (interacts with) CHST11" source="105926" target="105718" cy:directed="1"/>
      <edge id="106492" label="MEF2C (interacts with) SLC35B4" source="105926" target="105845" cy:directed="1"/>
      <edge id="106491" label="MEF2C (interacts with) B3GALT2" source="105926" target="105808" cy:directed="1"/>
      <edge id="106490" label="MEF2C (interacts with) CSGALNACT1" source="105926" target="105805" cy:directed="1"/>
      <edge id="106489" label="MEF2C (interacts with) MFNG" source="105926" target="105766" cy:directed="1"/>
      <edge id="106488" label="MEF2C (interacts with) DSE" source="105926" target="105779" cy:directed="1"/>
      <edge id="106487" label="MEF2C (interacts with) DSEL" source="105926" target="105857" cy:directed="1"/>
      <edge id="106486" label="MEF2C (interacts with) ST3GAL2" source="105926" target="105806" cy:directed="1"/>
      <edge id="106485" label="MEF2C (interacts with) CHSY3" source="105926" target="105833" cy:directed="1"/>
      <edge id="106484" label="MEF2C (interacts with) SLC35F1" source="105926" target="105927" cy:directed="1"/>
      <edge id="106483" label="MEF2C (interacts with) ARSB" source="105926" target="105843" cy:directed="1"/>
      <edge id="106482" label="MEF2C (interacts with) ST6GALNAC3" source="105926" target="105815" cy:directed="1"/>
      <edge id="106481" label="MEF2A (interacts with) HS2ST1" source="105925" target="105906" cy:directed="1"/>
      <edge id="106480" label="MEF2A (interacts with) DSE" source="105925" target="105779" cy:directed="1"/>
      <edge id="106479" label="MEF2A (interacts with) IDS" source="105925" target="105922" cy:directed="1"/>
      <edge id="106478" label="MEF2A (interacts with) CSGALNACT2" source="105925" target="105715" cy:directed="1"/>
      <edge id="106477" label="MED1 (interacts with) PIGW" source="105924" target="105729" cy:directed="1"/>
      <edge id="106476" label="MED1 (interacts with) FUT11" source="105924" target="105690" cy:directed="1"/>
      <edge id="106475" label="MECP2 (interacts with) NDST1" source="105921" target="105923" cy:directed="1"/>
      <edge id="106474" label="MECP2 (interacts with) IDS" source="105921" target="105922" cy:directed="1"/>
      <edge id="106473" label="MECOM (interacts with) GALNT12" source="105919" target="105812" cy:directed="1"/>
      <edge id="106472" label="MECOM (interacts with) ST3GAL2" source="105919" target="105806" cy:directed="1"/>
      <edge id="106471" label="MECOM (interacts with) ST6GALNAC1" source="105919" target="105920" cy:directed="1"/>
      <edge id="106470" label="MAZ (interacts with) MGAT4B" source="105916" target="105918" cy:directed="1"/>
      <edge id="106469" label="MAZ (interacts with) ALG1" source="105916" target="105867" cy:directed="1"/>
      <edge id="106468" label="MAZ (interacts with) B4GALNT4" source="105916" target="105784" cy:directed="1"/>
      <edge id="106467" label="MAZ (interacts with) RFNG" source="105916" target="105744" cy:directed="1"/>
      <edge id="106466" label="MAZ (interacts with) B3GAT3" source="105916" target="105754" cy:directed="1"/>
      <edge id="106465" label="MAZ (interacts with) B3GALT6" source="105916" target="105781" cy:directed="1"/>
      <edge id="106464" label="MAZ (interacts with) DPM2" source="105916" target="105758" cy:directed="1"/>
      <edge id="106463" label="MAZ (interacts with) B4GALT2" source="105916" target="105917" cy:directed="1"/>
      <edge id="106462" label="MAZ (interacts with) PIGQ" source="105916" target="105759" cy:directed="1"/>
      <edge id="106461" label="MAX (interacts with) PIGH" source="105915" target="105852" cy:directed="1"/>
      <edge id="106460" label="MAFB (interacts with) B3GNT5" source="105914" target="105707" cy:directed="1"/>
      <edge id="106459" label="MAFB (interacts with) DSE" source="105914" target="105779" cy:directed="1"/>
      <edge id="106458" label="LYL1 (interacts with) CHST2" source="105911" target="105838" cy:directed="1"/>
      <edge id="106457" label="LYL1 (interacts with) FKRP" source="105911" target="105896" cy:directed="1"/>
      <edge id="106456" label="LYL1 (interacts with) HYAL1" source="105911" target="105751" cy:directed="1"/>
      <edge id="106455" label="LYL1 (interacts with) CHST13" source="105911" target="105913" cy:directed="1"/>
      <edge id="106454" label="LYL1 (interacts with) HYAL2" source="105911" target="105737" cy:directed="1"/>
      <edge id="106453" label="LYL1 (interacts with) GBGT1" source="105911" target="105897" cy:directed="1"/>
      <edge id="106452" label="LYL1 (interacts with) IDUA" source="105911" target="105749" cy:directed="1"/>
      <edge id="106451" label="LYL1 (interacts with) ST3GAL2" source="105911" target="105806" cy:directed="1"/>
      <edge id="106450" label="LYL1 (interacts with) ST6GALNAC6" source="105911" target="105746" cy:directed="1"/>
      <edge id="106449" label="LYL1 (interacts with) CHST12" source="105911" target="105763" cy:directed="1"/>
      <edge id="106448" label="LYL1 (interacts with) RENBP" source="105911" target="105912" cy:directed="1"/>
      <edge id="106447" label="LYL1 (interacts with) MGAT1" source="105911" target="105724" cy:directed="1"/>
      <edge id="106446" label="LYL1 (interacts with) MAN2B1" source="105911" target="105777" cy:directed="1"/>
      <edge id="106445" label="LYL1 (interacts with) FUT7" source="105911" target="105685" cy:directed="1"/>
      <edge id="106444" label="LYL1 (interacts with) MFNG" source="105911" target="105766" cy:directed="1"/>
      <edge id="106443" label="LMO2 (interacts with) ST6GALNAC6" source="105909" target="105746" cy:directed="1"/>
      <edge id="106442" label="LMO2 (interacts with) CHST2" source="105909" target="105838" cy:directed="1"/>
      <edge id="106441" label="LMO2 (interacts with) HS3ST1" source="105909" target="105910" cy:directed="1"/>
      <edge id="106440" label="LMO2 (interacts with) GBGT1" source="105909" target="105897" cy:directed="1"/>
      <edge id="106439" label="LMO2 (interacts with) ST3GAL2" source="105909" target="105806" cy:directed="1"/>
      <edge id="106438" label="LMO2 (interacts with) MGAT1" source="105909" target="105724" cy:directed="1"/>
      <edge id="106437" label="LMO2 (interacts with) HYAL1" source="105909" target="105751" cy:directed="1"/>
      <edge id="106436" label="LMO2 (interacts with) CSGALNACT1" source="105909" target="105805" cy:directed="1"/>
      <edge id="106435" label="LMO2 (interacts with) HYAL2" source="105909" target="105737" cy:directed="1"/>
      <edge id="106434" label="LMO2 (interacts with) ST6GALNAC3" source="105909" target="105815" cy:directed="1"/>
      <edge id="106433" label="LMO2 (interacts with) ST8SIA4" source="105909" target="105834" cy:directed="1"/>
      <edge id="106432" label="LMO2 (interacts with) MFNG" source="105909" target="105766" cy:directed="1"/>
      <edge id="106431" label="KDM5B (interacts with) FKTN" source="105907" target="105713" cy:directed="1"/>
      <edge id="106430" label="KDM5B (interacts with) B3GALNT2" source="105907" target="105908" cy:directed="1"/>
      <edge id="106429" label="KDM5B (interacts with) FAM20B" source="105907" target="105731" cy:directed="1"/>
      <edge id="106428" label="KDM5B (interacts with) UGGT1" source="105907" target="105705" cy:directed="1"/>
      <edge id="106427" label="KDM5B (interacts with) MAN1A2" source="105907" target="105687" cy:directed="1"/>
      <edge id="106426" label="KDM5A (interacts with) HS2ST1" source="105904" target="105906" cy:directed="1"/>
      <edge id="106425" label="KDM5A (interacts with) SLC35A5" source="105904" target="105702" cy:directed="1"/>
      <edge id="106424" label="KDM5A (interacts with) PIGN" source="105904" target="105730" cy:directed="1"/>
      <edge id="106423" label="KDM5A (interacts with) GNS" source="105904" target="105905" cy:directed="1"/>
      <edge id="106422" label="KDM5A (interacts with) SLC35F5" source="105904" target="105696" cy:directed="1"/>
      <edge id="106421" label="KDM5A (interacts with) COG5" source="105904" target="105692" cy:directed="1"/>
      <edge id="106420" label="KDM5A (interacts with) FUT11" source="105904" target="105690" cy:directed="1"/>
      <edge id="106419" label="KDM5A (interacts with) SLC35A3" source="105904" target="105695" cy:directed="1"/>
      <edge id="106418" label="KDM5A (interacts with) UGGT1" source="105904" target="105705" cy:directed="1"/>
      <edge id="106417" label="KDM5A (interacts with) MAN2A1" source="105904" target="105694" cy:directed="1"/>
      <edge id="106416" label="KDM5A (interacts with) ALG10B" source="105904" target="105727" cy:directed="1"/>
      <edge id="106415" label="KDM5A (interacts with) NEU3" source="105904" target="105689" cy:directed="1"/>
      <edge id="106414" label="KDM5A (interacts with) ALG10" source="105904" target="105711" cy:directed="1"/>
      <edge id="106413" label="KDM3A (interacts with) FKTN" source="105903" target="105713" cy:directed="1"/>
      <edge id="106412" label="KDM1A (interacts with) GNB1" source="105901" target="105902" cy:directed="1"/>
      <edge id="106411" label="KAT5 (interacts with) B3GAT3" source="105900" target="105754" cy:directed="1"/>
      <edge id="106410" label="JUND (interacts with) HYAL2" source="105899" target="105737" cy:directed="1"/>
      <edge id="106409" label="JUND (interacts with) IDUA" source="105899" target="105749" cy:directed="1"/>
      <edge id="106408" label="JUND (interacts with) CHST12" source="105899" target="105763" cy:directed="1"/>
      <edge id="106407" label="JUND (interacts with) B3GAT3" source="105899" target="105754" cy:directed="1"/>
      <edge id="106406" label="JUND (interacts with) RFNG" source="105899" target="105744" cy:directed="1"/>
      <edge id="106405" label="JUND (interacts with) DPM3" source="105899" target="105722" cy:directed="1"/>
      <edge id="106404" label="JUNB (interacts with) HYAL1" source="105898" target="105751" cy:directed="1"/>
      <edge id="106403" label="JUNB (interacts with) GBGT1" source="105898" target="105897" cy:directed="1"/>
      <edge id="106402" label="JUNB (interacts with) CHST2" source="105898" target="105838" cy:directed="1"/>
      <edge id="106401" label="JUNB (interacts with) FKRP" source="105898" target="105896" cy:directed="1"/>
      <edge id="106400" label="JUNB (interacts with) MFNG" source="105898" target="105766" cy:directed="1"/>
      <edge id="106399" label="JUNB (interacts with) HYAL2" source="105898" target="105737" cy:directed="1"/>
      <edge id="106398" label="JUNB (interacts with) ST3GAL2" source="105898" target="105806" cy:directed="1"/>
      <edge id="106397" label="JUNB (interacts with) CHST12" source="105898" target="105763" cy:directed="1"/>
      <edge id="106396" label="JUNB (interacts with) HAS1" source="105898" target="105708" cy:directed="1"/>
      <edge id="106395" label="JUN (interacts with) MFNG" source="105895" target="105766" cy:directed="1"/>
      <edge id="106394" label="JUN (interacts with) GBGT1" source="105895" target="105897" cy:directed="1"/>
      <edge id="106393" label="JUN (interacts with) HAS1" source="105895" target="105708" cy:directed="1"/>
      <edge id="106392" label="JUN (interacts with) HYAL2" source="105895" target="105737" cy:directed="1"/>
      <edge id="106391" label="JUN (interacts with) FKRP" source="105895" target="105896" cy:directed="1"/>
      <edge id="106390" label="JMJD6 (interacts with) SLC35B1" source="105894" target="105798" cy:directed="1"/>
      <edge id="106389" label="JMJD6 (interacts with) GALK1" source="105894" target="105753" cy:directed="1"/>
      <edge id="106388" label="JMJD1C (interacts with) CHSY1" source="105892" target="105717" cy:directed="1"/>
      <edge id="106387" label="JMJD1C (interacts with) MGAT5" source="105892" target="105893" cy:directed="1"/>
      <edge id="106386" label="JMJD1C (interacts with) NDST2" source="105892" target="105772" cy:directed="1"/>
      <edge id="106385" label="JMJD1C (interacts with) CSGALNACT2" source="105892" target="105715" cy:directed="1"/>
      <edge id="106384" label="JMJD1C (interacts with) FUT11" source="105892" target="105690" cy:directed="1"/>
      <edge id="106383" label="JDP2 (interacts with) MGAT1" source="105891" target="105724" cy:directed="1"/>
      <edge id="106382" label="IRF8 (interacts with) DSE" source="105890" target="105779" cy:directed="1"/>
      <edge id="106381" label="IRF8 (interacts with) GM2A" source="105890" target="105883" cy:directed="1"/>
      <edge id="106380" label="IRF8 (interacts with) LIPA" source="105890" target="105884" cy:directed="1"/>
      <edge id="106379" label="IRF8 (interacts with) ST8SIA4" source="105890" target="105834" cy:directed="1"/>
      <edge id="106378" label="IRF8 (interacts with) HK3" source="105890" target="105859" cy:directed="1"/>
      <edge id="106377" label="IRF5 (interacts with) FUT7" source="105889" target="105685" cy:directed="1"/>
      <edge id="106376" label="IRF5 (interacts with) HK3" source="105889" target="105859" cy:directed="1"/>
      <edge id="106375" label="IRF4 (interacts with) FUT4" source="105888" target="105810" cy:directed="1"/>
      <edge id="106374" label="IRF4 (interacts with) CHST2" source="105888" target="105838" cy:directed="1"/>
      <edge id="106373" label="IRF4 (interacts with) CHST11" source="105888" target="105718" cy:directed="1"/>
      <edge id="106372" label="IRF4 (interacts with) LAMP3" source="105888" target="105776" cy:directed="1"/>
      <edge id="106371" label="IRF4 (interacts with) ST8SIA1" source="105888" target="105840" cy:directed="1"/>
      <edge id="106370" label="IRF4 (interacts with) ST8SIA4" source="105888" target="105834" cy:directed="1"/>
      <edge id="106369" label="IRF4 (interacts with) FUT7" source="105888" target="105685" cy:directed="1"/>
      <edge id="106368" label="IRF4 (interacts with) MFNG" source="105888" target="105766" cy:directed="1"/>
      <edge id="106367" label="IRF1 (interacts with) LAMP3" source="105887" target="105776" cy:directed="1"/>
      <edge id="106366" label="INTS3 (interacts with) B4GALT3" source="105886" target="105789" cy:directed="1"/>
      <edge id="106365" label="INO80 (interacts with) RTF1" source="105885" target="105700" cy:directed="1"/>
      <edge id="106364" label="IKZF1 (interacts with) NPL" source="105882" target="105860" cy:directed="1"/>
      <edge id="106363" label="IKZF1 (interacts with) DSE" source="105882" target="105779" cy:directed="1"/>
      <edge id="106362" label="IKZF1 (interacts with) LIPA" source="105882" target="105884" cy:directed="1"/>
      <edge id="106361" label="IKZF1 (interacts with) FUT7" source="105882" target="105685" cy:directed="1"/>
      <edge id="106360" label="IKZF1 (interacts with) GM2A" source="105882" target="105883" cy:directed="1"/>
      <edge id="106359" label="IKZF1 (interacts with) MAN2B1" source="105882" target="105777" cy:directed="1"/>
      <edge id="106358" label="IKZF1 (interacts with) LAMP3" source="105882" target="105776" cy:directed="1"/>
      <edge id="106357" label="IKZF1 (interacts with) ST8SIA4" source="105882" target="105834" cy:directed="1"/>
      <edge id="106356" label="IKZF1 (interacts with) MFNG" source="105882" target="105766" cy:directed="1"/>
      <edge id="106355" label="HSF1 (interacts with) GALK1" source="105879" target="105753" cy:directed="1"/>
      <edge id="106354" label="HSF1 (interacts with) B3GAT3" source="105879" target="105754" cy:directed="1"/>
      <edge id="106353" label="HSF1 (interacts with) RFNG" source="105879" target="105744" cy:directed="1"/>
      <edge id="106352" label="HSF1 (interacts with) GPAA1" source="105879" target="105881" cy:directed="1"/>
      <edge id="106351" label="HSF1 (interacts with) TSTA3" source="105879" target="105880" cy:directed="1"/>
      <edge id="106350" label="HINFP (interacts with) DPAGT1" source="105877" target="105878" cy:directed="1"/>
      <edge id="106349" label="HES4 (interacts with) MOGS" source="105876" target="105762" cy:directed="1"/>
      <edge id="106348" label="HES4 (interacts with) GALK1" source="105876" target="105753" cy:directed="1"/>
      <edge id="106347" label="HECTD1 (interacts with) FUT11" source="105875" target="105690" cy:directed="1"/>
      <edge id="106346" label="HCFC1 (interacts with) NDST2" source="105873" target="105772" cy:directed="1"/>
      <edge id="106345" label="HCFC1 (interacts with) PIGO" source="105873" target="105874" cy:directed="1"/>
      <edge id="106344" label="HCFC1 (interacts with) NEU3" source="105873" target="105689" cy:directed="1"/>
      <edge id="106343" label="H2AFX (interacts with) B3GAT3" source="105872" target="105754" cy:directed="1"/>
      <edge id="106342" label="H2AFX (interacts with) DPM2" source="105872" target="105758" cy:directed="1"/>
      <edge id="106341" label="GTF2I (interacts with) POFUT1" source="105871" target="105792" cy:directed="1"/>
      <edge id="106340" label="GTF2I (interacts with) ALG10B" source="105871" target="105727" cy:directed="1"/>
      <edge id="106339" label="GTF2I (interacts with) SLC35A3" source="105871" target="105695" cy:directed="1"/>
      <edge id="106338" label="GTF2I (interacts with) COG5" source="105871" target="105692" cy:directed="1"/>
      <edge id="106337" label="GTF2F1 (interacts with) GALK1" source="105870" target="105753" cy:directed="1"/>
      <edge id="106336" label="GTF2F1 (interacts with) IDUA" source="105870" target="105749" cy:directed="1"/>
      <edge id="106335" label="GTF2F1 (interacts with) DPM3" source="105870" target="105722" cy:directed="1"/>
      <edge id="106334" label="GTF2F1 (interacts with) MOGS" source="105870" target="105762" cy:directed="1"/>
      <edge id="106333" label="GTF2F1 (interacts with) B3GAT3" source="105870" target="105754" cy:directed="1"/>
      <edge id="106332" label="GTF2F1 (interacts with) RFNG" source="105870" target="105744" cy:directed="1"/>
      <edge id="106331" label="GTF2B (interacts with) CTBS" source="105868" target="105869" cy:directed="1"/>
      <edge id="106330" label="GLYR1 (interacts with) ALG1" source="105866" target="105867" cy:directed="1"/>
      <edge id="106329" label="GLYR1 (interacts with) COG7" source="105866" target="105791" cy:directed="1"/>
      <edge id="106328" label="GLI2 (interacts with) ST3GAL2" source="105865" target="105806" cy:directed="1"/>
      <edge id="106327" label="GATAD1 (interacts with) COG7" source="105863" target="105791" cy:directed="1"/>
      <edge id="106326" label="GATAD1 (interacts with) ALG13" source="105863" target="105864" cy:directed="1"/>
      <edge id="106325" label="GATA6 (interacts with) MFNG" source="105862" target="105766" cy:directed="1"/>
      <edge id="106324" label="GABPA (interacts with) FUT11" source="105861" target="105690" cy:directed="1"/>
      <edge id="106323" label="GABPA (interacts with) SLC35A3" source="105861" target="105695" cy:directed="1"/>
      <edge id="106322" label="GABPA (interacts with) ALG10B" source="105861" target="105727" cy:directed="1"/>
      <edge id="106321" label="GABPA (interacts with) SLC35A5" source="105861" target="105702" cy:directed="1"/>
      <edge id="106320" label="FOXP3 (interacts with) MGAT1" source="105858" target="105724" cy:directed="1"/>
      <edge id="106319" label="FOXP3 (interacts with) NPL" source="105858" target="105860" cy:directed="1"/>
      <edge id="106318" label="FOXP3 (interacts with) GAL3ST4" source="105858" target="105778" cy:directed="1"/>
      <edge id="106317" label="FOXP3 (interacts with) ST8SIA1" source="105858" target="105840" cy:directed="1"/>
      <edge id="106316" label="FOXP3 (interacts with) MFNG" source="105858" target="105766" cy:directed="1"/>
      <edge id="106315" label="FOXP3 (interacts with) CHST11" source="105858" target="105718" cy:directed="1"/>
      <edge id="106314" label="FOXP3 (interacts with) HK3" source="105858" target="105859" cy:directed="1"/>
      <edge id="106313" label="FOXP3 (interacts with) ST8SIA4" source="105858" target="105834" cy:directed="1"/>
      <edge id="106312" label="FOXP3 (interacts with) FUT7" source="105858" target="105685" cy:directed="1"/>
      <edge id="106311" label="FOXO1 (interacts with) FUT4" source="105856" target="105810" cy:directed="1"/>
      <edge id="106310" label="FOXO1 (interacts with) CHST2" source="105856" target="105838" cy:directed="1"/>
      <edge id="106309" label="FOXO1 (interacts with) UST" source="105856" target="105836" cy:directed="1"/>
      <edge id="106308" label="FOXO1 (interacts with) ST3GAL2" source="105856" target="105806" cy:directed="1"/>
      <edge id="106307" label="FOXO1 (interacts with) DSEL" source="105856" target="105857" cy:directed="1"/>
      <edge id="106306" label="FOXO1 (interacts with) GFPT2" source="105856" target="105719" cy:directed="1"/>
      <edge id="106305" label="FOXO1 (interacts with) CHST3" source="105856" target="105807" cy:directed="1"/>
      <edge id="106304" label="FOXO1 (interacts with) ST6GALNAC3" source="105856" target="105815" cy:directed="1"/>
      <edge id="106303" label="FOXO1 (interacts with) CSGALNACT1" source="105856" target="105805" cy:directed="1"/>
      <edge id="106302" label="FOXO1 (interacts with) DSE" source="105856" target="105779" cy:directed="1"/>
      <edge id="106301" label="FOXO1 (interacts with) CSGALNACT2" source="105856" target="105715" cy:directed="1"/>
      <edge id="106300" label="FOXM1 (interacts with) ALG3" source="105853" target="105797" cy:directed="1"/>
      <edge id="106299" label="FOXM1 (interacts with) GNPNAT1" source="105853" target="105855" cy:directed="1"/>
      <edge id="106298" label="FOXM1 (interacts with) RPN2" source="105853" target="105854" cy:directed="1"/>
      <edge id="106297" label="FOXM1 (interacts with) PIGW" source="105853" target="105729" cy:directed="1"/>
      <edge id="106296" label="FOXM1 (interacts with) SLC35B1" source="105853" target="105798" cy:directed="1"/>
      <edge id="106295" label="FOXA1 (interacts with) PIGH" source="105850" target="105852" cy:directed="1"/>
      <edge id="106294" label="FOXA1 (interacts with) GLCE" source="105850" target="105851" cy:directed="1"/>
      <edge id="106293" label="FOS (interacts with) B3GNT5" source="105849" target="105707" cy:directed="1"/>
      <edge id="106292" label="FLI1 (interacts with) B3GNT5" source="105848" target="105707" cy:directed="1"/>
      <edge id="106291" label="FLI1 (interacts with) ST3GAL6" source="105848" target="105811" cy:directed="1"/>
      <edge id="106290" label="FLI1 (interacts with) CHST2" source="105848" target="105838" cy:directed="1"/>
      <edge id="106289" label="FLI1 (interacts with) LAMP3" source="105848" target="105776" cy:directed="1"/>
      <edge id="106288" label="FLI1 (interacts with) HS3ST3B1" source="105848" target="105841" cy:directed="1"/>
      <edge id="106287" label="FLI1 (interacts with) ST6GALNAC3" source="105848" target="105815" cy:directed="1"/>
      <edge id="106286" label="FLI1 (interacts with) CSGALNACT1" source="105848" target="105805" cy:directed="1"/>
      <edge id="106285" label="FLI1 (interacts with) ST8SIA1" source="105848" target="105840" cy:directed="1"/>
      <edge id="106284" label="FLI1 (interacts with) CHST11" source="105848" target="105718" cy:directed="1"/>
      <edge id="106283" label="FLI1 (interacts with) FUT7" source="105848" target="105685" cy:directed="1"/>
      <edge id="106282" label="FLI1 (interacts with) ST3GAL2" source="105848" target="105806" cy:directed="1"/>
      <edge id="106281" label="FLI1 (interacts with) ST8SIA4" source="105848" target="105834" cy:directed="1"/>
      <edge id="106280" label="FLI1 (interacts with) MFNG" source="105848" target="105766" cy:directed="1"/>
      <edge id="106279" label="FANCD2 (interacts with) PIGW" source="105847" target="105729" cy:directed="1"/>
      <edge id="106278" label="EZH1 (interacts with) NDST2" source="105846" target="105772" cy:directed="1"/>
      <edge id="106277" label="EZH1 (interacts with) OGT" source="105846" target="105771" cy:directed="1"/>
      <edge id="106276" label="ETV1 (interacts with) GAL3ST4" source="105842" target="105778" cy:directed="1"/>
      <edge id="106275" label="ETV1 (interacts with) SLC35B4" source="105842" target="105845" cy:directed="1"/>
      <edge id="106274" label="ETV1 (interacts with) TPST1" source="105842" target="105809" cy:directed="1"/>
      <edge id="106273" label="ETV1 (interacts with) CHST3" source="105842" target="105807" cy:directed="1"/>
      <edge id="106272" label="ETV1 (interacts with) ST3GAL6" source="105842" target="105811" cy:directed="1"/>
      <edge id="106271" label="ETV1 (interacts with) CSGALNACT2" source="105842" target="105715" cy:directed="1"/>
      <edge id="106270" label="ETV1 (interacts with) EXTL2" source="105842" target="105844" cy:directed="1"/>
      <edge id="106269" label="ETV1 (interacts with) ARSB" source="105842" target="105843" cy:directed="1"/>
      <edge id="106268" label="ETS1 (interacts with) ST3GAL6" source="105839" target="105811" cy:directed="1"/>
      <edge id="106267" label="ETS1 (interacts with) HYAL1" source="105839" target="105751" cy:directed="1"/>
      <edge id="106266" label="ETS1 (interacts with) GALNT12" source="105839" target="105812" cy:directed="1"/>
      <edge id="106265" label="ETS1 (interacts with) B3GALT2" source="105839" target="105808" cy:directed="1"/>
      <edge id="106264" label="ETS1 (interacts with) B3GNT5" source="105839" target="105707" cy:directed="1"/>
      <edge id="106263" label="ETS1 (interacts with) CHST2" source="105839" target="105838" cy:directed="1"/>
      <edge id="106262" label="ETS1 (interacts with) FUT4" source="105839" target="105810" cy:directed="1"/>
      <edge id="106261" label="ETS1 (interacts with) CHST3" source="105839" target="105807" cy:directed="1"/>
      <edge id="106260" label="ETS1 (interacts with) HS3ST3B1" source="105839" target="105841" cy:directed="1"/>
      <edge id="106259" label="ETS1 (interacts with) ST8SIA1" source="105839" target="105840" cy:directed="1"/>
      <edge id="106258" label="ETS1 (interacts with) CSGALNACT1" source="105839" target="105805" cy:directed="1"/>
      <edge id="106257" label="ETS1 (interacts with) GFPT2" source="105839" target="105719" cy:directed="1"/>
      <edge id="106256" label="ETS1 (interacts with) ST6GALNAC3" source="105839" target="105815" cy:directed="1"/>
      <edge id="106255" label="ETS1 (interacts with) ST8SIA4" source="105839" target="105834" cy:directed="1"/>
      <edge id="106254" label="ETS1 (interacts with) MFNG" source="105839" target="105766" cy:directed="1"/>
      <edge id="106253" label="ETS1 (interacts with) CHST11" source="105839" target="105718" cy:directed="1"/>
      <edge id="106252" label="ERG (interacts with) TPST1" source="105832" target="105809" cy:directed="1"/>
      <edge id="106251" label="ERG (interacts with) HAS2" source="105832" target="105709" cy:directed="1"/>
      <edge id="106250" label="ERG (interacts with) GFPT2" source="105832" target="105719" cy:directed="1"/>
      <edge id="106249" label="ERG (interacts with) GALNT12" source="105832" target="105812" cy:directed="1"/>
      <edge id="106248" label="ERG (interacts with) CHST2" source="105832" target="105838" cy:directed="1"/>
      <edge id="106247" label="ERG (interacts with) FUT4" source="105832" target="105810" cy:directed="1"/>
      <edge id="106246" label="ERG (interacts with) SULT1C4" source="105832" target="105837" cy:directed="1"/>
      <edge id="106245" label="ERG (interacts with) UST" source="105832" target="105836" cy:directed="1"/>
      <edge id="106244" label="ERG (interacts with) ST3GAL6" source="105832" target="105811" cy:directed="1"/>
      <edge id="106243" label="ERG (interacts with) B3GALT2" source="105832" target="105808" cy:directed="1"/>
      <edge id="106242" label="ERG (interacts with) CHST3" source="105832" target="105807" cy:directed="1"/>
      <edge id="106241" label="ERG (interacts with) CHST7" source="105832" target="105835" cy:directed="1"/>
      <edge id="106240" label="ERG (interacts with) CSGALNACT1" source="105832" target="105805" cy:directed="1"/>
      <edge id="106239" label="ERG (interacts with) ST8SIA4" source="105832" target="105834" cy:directed="1"/>
      <edge id="106238" label="ERG (interacts with) ST6GALNAC3" source="105832" target="105815" cy:directed="1"/>
      <edge id="106237" label="ERG (interacts with) CHSY3" source="105832" target="105833" cy:directed="1"/>
      <edge id="106236" label="ERG (interacts with) MFNG" source="105832" target="105766" cy:directed="1"/>
      <edge id="106235" label="ERF (interacts with) HYAL2" source="105831" target="105737" cy:directed="1"/>
      <edge id="106234" label="ERF (interacts with) B4GALT7" source="105831" target="105782" cy:directed="1"/>
      <edge id="106233" label="ERF (interacts with) RFNG" source="105831" target="105744" cy:directed="1"/>
      <edge id="106232" label="ERF (interacts with) CHST12" source="105831" target="105763" cy:directed="1"/>
      <edge id="106231" label="ERF (interacts with) PIGQ" source="105831" target="105759" cy:directed="1"/>
      <edge id="106230" label="ERCC6 (interacts with) FUT11" source="105830" target="105690" cy:directed="1"/>
      <edge id="106229" label="ERCC6 (interacts with) RTF1" source="105830" target="105700" cy:directed="1"/>
      <edge id="106228" label="ERCC6 (interacts with) SLC35A5" source="105830" target="105702" cy:directed="1"/>
      <edge id="106227" label="ERCC6 (interacts with) SLC35A3" source="105830" target="105695" cy:directed="1"/>
      <edge id="106226" label="ERCC6 (interacts with) SLC35F5" source="105830" target="105696" cy:directed="1"/>
      <edge id="106225" label="ERCC6 (interacts with) UGGT1" source="105830" target="105705" cy:directed="1"/>
      <edge id="106224" label="ERCC6 (interacts with) MAN2A1" source="105830" target="105694" cy:directed="1"/>
      <edge id="106223" label="ERCC6 (interacts with) ACER2" source="105830" target="105691" cy:directed="1"/>
      <edge id="106222" label="ERCC6 (interacts with) COG5" source="105830" target="105692" cy:directed="1"/>
      <edge id="106221" label="ERCC6 (interacts with) STT3B" source="105830" target="105688" cy:directed="1"/>
      <edge id="106220" label="ERCC6 (interacts with) MAN1A2" source="105830" target="105687" cy:directed="1"/>
      <edge id="106219" label="EP400 (interacts with) ACER2" source="105829" target="105691" cy:directed="1"/>
      <edge id="106218" label="EP400 (interacts with) OGT" source="105829" target="105771" cy:directed="1"/>
      <edge id="106217" label="EP400 (interacts with) FKTN" source="105829" target="105713" cy:directed="1"/>
      <edge id="106216" label="ELL (interacts with) HYAL2" source="105828" target="105737" cy:directed="1"/>
      <edge id="106215" label="ELK4 (interacts with) SLC35F5" source="105827" target="105696" cy:directed="1"/>
      <edge id="106214" label="ELK4 (interacts with) SLC35A3" source="105827" target="105695" cy:directed="1"/>
      <edge id="106213" label="ELK4 (interacts with) ACER2" source="105827" target="105691" cy:directed="1"/>
      <edge id="106212" label="ELK4 (interacts with) UGGT1" source="105827" target="105705" cy:directed="1"/>
      <edge id="106211" label="ELK4 (interacts with) FUT11" source="105827" target="105690" cy:directed="1"/>
      <edge id="106210" label="ELK4 (interacts with) ALG10" source="105827" target="105711" cy:directed="1"/>
      <edge id="106209" label="ELK3 (interacts with) FUT11" source="105826" target="105690" cy:directed="1"/>
      <edge id="106208" label="ELF2 (interacts with) ALG10B" source="105825" target="105727" cy:directed="1"/>
      <edge id="106207" label="ELF1 (interacts with) UGGT1" source="105822" target="105705" cy:directed="1"/>
      <edge id="106206" label="ELF1 (interacts with) MAN1A2" source="105822" target="105687" cy:directed="1"/>
      <edge id="106205" label="ELF1 (interacts with) SLC35A5" source="105822" target="105702" cy:directed="1"/>
      <edge id="106204" label="ELF1 (interacts with) COG6" source="105822" target="105824" cy:directed="1"/>
      <edge id="106203" label="ELF1 (interacts with) COG3" source="105822" target="105823" cy:directed="1"/>
      <edge id="106202" label="EHMT2 (interacts with) MOGS" source="105821" target="105762" cy:directed="1"/>
      <edge id="106201" label="EHF (interacts with) UAP1" source="105819" target="105820" cy:directed="1"/>
      <edge id="106200" label="EHF (interacts with) MAN2A1" source="105819" target="105694" cy:directed="1"/>
      <edge id="106199" label="EGR2 (interacts with) B3GALT1" source="105816" target="105818" cy:directed="1"/>
      <edge id="106198" label="EGR2 (interacts with) HPSE2" source="105816" target="105817" cy:directed="1"/>
      <edge id="106197" label="EGR2 (interacts with) B3GNT5" source="105816" target="105707" cy:directed="1"/>
      <edge id="106196" label="EGR2 (interacts with) MGAT3" source="105816" target="105750" cy:directed="1"/>
      <edge id="106195" label="EGR2 (interacts with) CSGALNACT1" source="105816" target="105805" cy:directed="1"/>
      <edge id="106194" label="EGR2 (interacts with) TPST1" source="105816" target="105809" cy:directed="1"/>
      <edge id="106193" label="EGR2 (interacts with) GFPT2" source="105816" target="105719" cy:directed="1"/>
      <edge id="106192" label="EGR1 (interacts with) GFPT2" source="105814" target="105719" cy:directed="1"/>
      <edge id="106191" label="EGR1 (interacts with) ST6GALNAC3" source="105814" target="105815" cy:directed="1"/>
      <edge id="106190" label="EGR1 (interacts with) CSGALNACT1" source="105814" target="105805" cy:directed="1"/>
      <edge id="106189" label="EGR1 (interacts with) HAS2" source="105814" target="105709" cy:directed="1"/>
      <edge id="106188" label="EGR1 (interacts with) CHST3" source="105814" target="105807" cy:directed="1"/>
      <edge id="106187" label="EGR1 (interacts with) B3GNT5" source="105814" target="105707" cy:directed="1"/>
      <edge id="106186" label="EGLN2 (interacts with) MOGS" source="105813" target="105762" cy:directed="1"/>
      <edge id="106185" label="EGLN2 (interacts with) B3GAT3" source="105813" target="105754" cy:directed="1"/>
      <edge id="106184" label="EBF1 (interacts with) GALNT12" source="105804" target="105812" cy:directed="1"/>
      <edge id="106183" label="EBF1 (interacts with) ST3GAL6" source="105804" target="105811" cy:directed="1"/>
      <edge id="106182" label="EBF1 (interacts with) FUT4" source="105804" target="105810" cy:directed="1"/>
      <edge id="106181" label="EBF1 (interacts with) TPST1" source="105804" target="105809" cy:directed="1"/>
      <edge id="106180" label="EBF1 (interacts with) HAS1" source="105804" target="105708" cy:directed="1"/>
      <edge id="106179" label="EBF1 (interacts with) B3GALT2" source="105804" target="105808" cy:directed="1"/>
      <edge id="106178" label="EBF1 (interacts with) HYAL1" source="105804" target="105751" cy:directed="1"/>
      <edge id="106177" label="EBF1 (interacts with) CHST3" source="105804" target="105807" cy:directed="1"/>
      <edge id="106176" label="EBF1 (interacts with) HAS2" source="105804" target="105709" cy:directed="1"/>
      <edge id="106175" label="EBF1 (interacts with) ST3GAL2" source="105804" target="105806" cy:directed="1"/>
      <edge id="106174" label="EBF1 (interacts with) CSGALNACT1" source="105804" target="105805" cy:directed="1"/>
      <edge id="106173" label="E2F7 (interacts with) PIGW" source="105803" target="105729" cy:directed="1"/>
      <edge id="106172" label="E2F6 (interacts with) FUT1" source="105801" target="105802" cy:directed="1"/>
      <edge id="106171" label="E2F1 (interacts with) KHK" source="105796" target="105800" cy:directed="1"/>
      <edge id="106170" label="E2F1 (interacts with) DPM1" source="105796" target="105799" cy:directed="1"/>
      <edge id="106169" label="E2F1 (interacts with) SLC35B1" source="105796" target="105798" cy:directed="1"/>
      <edge id="106168" label="E2F1 (interacts with) ALG3" source="105796" target="105797" cy:directed="1"/>
      <edge id="106167" label="E2F1 (interacts with) PIGW" source="105796" target="105729" cy:directed="1"/>
      <edge id="106166" label="DEK (interacts with) ALG10" source="105795" target="105711" cy:directed="1"/>
      <edge id="106165" label="CTNNB1 (interacts with) CHSY1" source="105794" target="105717" cy:directed="1"/>
      <edge id="106164" label="CTNNB1 (interacts with) MAN2A1" source="105794" target="105694" cy:directed="1"/>
      <edge id="106163" label="CTNNB1 (interacts with) STT3B" source="105794" target="105688" cy:directed="1"/>
      <edge id="106162" label="CTBP1 (interacts with) MOGS" source="105793" target="105762" cy:directed="1"/>
      <edge id="106161" label="CTBP1 (interacts with) B4GALT7" source="105793" target="105782" cy:directed="1"/>
      <edge id="106160" label="CTBP1 (interacts with) CHST12" source="105793" target="105763" cy:directed="1"/>
      <edge id="106159" label="CTBP1 (interacts with) DPM3" source="105793" target="105722" cy:directed="1"/>
      <edge id="106158" label="CTBP1 (interacts with) B3GAT3" source="105793" target="105754" cy:directed="1"/>
      <edge id="106157" label="CREBBP (interacts with) POFUT1" source="105790" target="105792" cy:directed="1"/>
      <edge id="106156" label="CREBBP (interacts with) COG7" source="105790" target="105791" cy:directed="1"/>
      <edge id="106155" label="CREBBP (interacts with) ACER2" source="105790" target="105691" cy:directed="1"/>
      <edge id="106154" label="CREBBP (interacts with) NEU3" source="105790" target="105689" cy:directed="1"/>
      <edge id="106153" label="CREBBP (interacts with) MAN1A2" source="105790" target="105687" cy:directed="1"/>
      <edge id="106152" label="CREB3L4 (interacts with) B4GALT3" source="105788" target="105789" cy:directed="1"/>
      <edge id="106151" label="CREB3 (interacts with) GMPPA" source="105786" target="105787" cy:directed="1"/>
      <edge id="106150" label="CREB1 (interacts with) FUT11" source="105785" target="105690" cy:directed="1"/>
      <edge id="106149" label="CPSF3L (interacts with) B4GALNT4" source="105780" target="105784" cy:directed="1"/>
      <edge id="106148" label="CPSF3L (interacts with) PMM1" source="105780" target="105735" cy:directed="1"/>
      <edge id="106147" label="CPSF3L (interacts with) ST3GAL3" source="105780" target="105747" cy:directed="1"/>
      <edge id="106146" label="CPSF3L (interacts with) POMGNT1" source="105780" target="105783" cy:directed="1"/>
      <edge id="106145" label="CPSF3L (interacts with) B4GALT7" source="105780" target="105782" cy:directed="1"/>
      <edge id="106144" label="CPSF3L (interacts with) MOGS" source="105780" target="105762" cy:directed="1"/>
      <edge id="106143" label="CPSF3L (interacts with) B3GAT3" source="105780" target="105754" cy:directed="1"/>
      <edge id="106142" label="CPSF3L (interacts with) PIGQ" source="105780" target="105759" cy:directed="1"/>
      <edge id="106141" label="CPSF3L (interacts with) RFNG" source="105780" target="105744" cy:directed="1"/>
      <edge id="106140" label="CPSF3L (interacts with) B3GALT6" source="105780" target="105781" cy:directed="1"/>
      <edge id="106139" label="CIITA (interacts with) DSE" source="105775" target="105779" cy:directed="1"/>
      <edge id="106138" label="CIITA (interacts with) GAL3ST4" source="105775" target="105778" cy:directed="1"/>
      <edge id="106137" label="CIITA (interacts with) MAN2B1" source="105775" target="105777" cy:directed="1"/>
      <edge id="106136" label="CIITA (interacts with) LAMP3" source="105775" target="105776" cy:directed="1"/>
      <edge id="106135" label="CIITA (interacts with) FUT7" source="105775" target="105685" cy:directed="1"/>
      <edge id="106134" label="CHD8 (interacts with) FKTN" source="105774" target="105713" cy:directed="1"/>
      <edge id="106133" label="CHD8 (interacts with) ACER2" source="105774" target="105691" cy:directed="1"/>
      <edge id="106132" label="CHD8 (interacts with) ALG10" source="105774" target="105711" cy:directed="1"/>
      <edge id="106131" label="CHD8 (interacts with) FUT11" source="105774" target="105690" cy:directed="1"/>
      <edge id="106130" label="CHD8 (interacts with) STT3B" source="105774" target="105688" cy:directed="1"/>
      <edge id="106129" label="CHD8 (interacts with) NEU3" source="105774" target="105689" cy:directed="1"/>
      <edge id="106128" label="CHD4 (interacts with) NEU3" source="105773" target="105689" cy:directed="1"/>
      <edge id="106127" label="CHD2 (interacts with) NDST2" source="105770" target="105772" cy:directed="1"/>
      <edge id="106126" label="CHD2 (interacts with) OGT" source="105770" target="105771" cy:directed="1"/>
      <edge id="106125" label="CHD1 (interacts with) ALG10" source="105769" target="105711" cy:directed="1"/>
      <edge id="106124" label="CHD1 (interacts with) ACER2" source="105769" target="105691" cy:directed="1"/>
      <edge id="106123" label="CHD1 (interacts with) SLC35A3" source="105769" target="105695" cy:directed="1"/>
      <edge id="106122" label="CEBPB (interacts with) A4GALT" source="105767" target="105768" cy:directed="1"/>
      <edge id="106121" label="CEBPB (interacts with) CHST12" source="105767" target="105763" cy:directed="1"/>
      <edge id="106120" label="CEBPA (interacts with) FUT7" source="105764" target="105685" cy:directed="1"/>
      <edge id="106119" label="CEBPA (interacts with) MFNG" source="105764" target="105766" cy:directed="1"/>
      <edge id="106118" label="CEBPA (interacts with) NAGK" source="105764" target="105765" cy:directed="1"/>
      <edge id="106117" label="CEBPA (interacts with) MGAT1" source="105764" target="105724" cy:directed="1"/>
      <edge id="106116" label="CDK9 (interacts with) IDUA" source="105757" target="105749" cy:directed="1"/>
      <edge id="106115" label="CDK9 (interacts with) CHST12" source="105757" target="105763" cy:directed="1"/>
      <edge id="106114" label="CDK9 (interacts with) MOGS" source="105757" target="105762" cy:directed="1"/>
      <edge id="106113" label="CDK9 (interacts with) POMT1" source="105757" target="105761" cy:directed="1"/>
      <edge id="106112" label="CDK9 (interacts with) ST6GALNAC6" source="105757" target="105746" cy:directed="1"/>
      <edge id="106111" label="CDK9 (interacts with) DPM3" source="105757" target="105722" cy:directed="1"/>
      <edge id="106110" label="CDK9 (interacts with) RFNG" source="105757" target="105744" cy:directed="1"/>
      <edge id="106109" label="CDK9 (interacts with) MAN1B1" source="105757" target="105760" cy:directed="1"/>
      <edge id="106108" label="CDK9 (interacts with) PIGQ" source="105757" target="105759" cy:directed="1"/>
      <edge id="106107" label="CDK9 (interacts with) DPM2" source="105757" target="105758" cy:directed="1"/>
      <edge id="106106" label="CDK8 (interacts with) UGGT1" source="105756" target="105705" cy:directed="1"/>
      <edge id="106105" label="CDK8 (interacts with) STT3B" source="105756" target="105688" cy:directed="1"/>
      <edge id="106104" label="CCDC101 (interacts with) B3GAT3" source="105755" target="105754" cy:directed="1"/>
      <edge id="106103" label="CBX8 (interacts with) B3GAT3" source="105752" target="105754" cy:directed="1"/>
      <edge id="106102" label="CBX8 (interacts with) GALK1" source="105752" target="105753" cy:directed="1"/>
      <edge id="106101" label="CBX8 (interacts with) RFNG" source="105752" target="105744" cy:directed="1"/>
      <edge id="106100" label="CBX7 (interacts with) HYAL1" source="105745" target="105751" cy:directed="1"/>
      <edge id="106099" label="CBX7 (interacts with) MGAT3" source="105745" target="105750" cy:directed="1"/>
      <edge id="106098" label="CBX7 (interacts with) IDUA" source="105745" target="105749" cy:directed="1"/>
      <edge id="106097" label="CBX7 (interacts with) MAN2A2" source="105745" target="105748" cy:directed="1"/>
      <edge id="106096" label="CBX7 (interacts with) ST3GAL3" source="105745" target="105747" cy:directed="1"/>
      <edge id="106095" label="CBX7 (interacts with) ST6GALNAC6" source="105745" target="105746" cy:directed="1"/>
      <edge id="106094" label="CBX4 (interacts with) RFNG" source="105743" target="105744" cy:directed="1"/>
      <edge id="106093" label="CBX3 (interacts with) CMAS" source="105741" target="105742" cy:directed="1"/>
      <edge id="106092" label="CBFB (interacts with) GALNS" source="105739" target="105740" cy:directed="1"/>
      <edge id="106091" label="CASP8AP2 (interacts with) SLC35A5" source="105738" target="105702" cy:directed="1"/>
      <edge id="106090" label="CASP8AP2 (interacts with) ALG10" source="105738" target="105711" cy:directed="1"/>
      <edge id="106089" label="CASP8AP2 (interacts with) ALG10B" source="105738" target="105727" cy:directed="1"/>
      <edge id="106088" label="C17orf49 (interacts with) HYAL2" source="105736" target="105737" cy:directed="1"/>
      <edge id="106087" label="BRD1 (interacts with) PMM1" source="105733" target="105735" cy:directed="1"/>
      <edge id="106086" label="BRD1 (interacts with) ALG12" source="105733" target="105734" cy:directed="1"/>
      <edge id="106085" label="BRCA1 (interacts with) SLC35E3" source="105728" target="105732" cy:directed="1"/>
      <edge id="106084" label="BRCA1 (interacts with) FAM20B" source="105728" target="105731" cy:directed="1"/>
      <edge id="106083" label="BRCA1 (interacts with) PIGN" source="105728" target="105730" cy:directed="1"/>
      <edge id="106082" label="BRCA1 (interacts with) ALG10" source="105728" target="105711" cy:directed="1"/>
      <edge id="106081" label="BRCA1 (interacts with) PIGW" source="105728" target="105729" cy:directed="1"/>
      <edge id="106080" label="BMI1 (interacts with) GALNT4" source="105726" target="105703" cy:directed="1"/>
      <edge id="106079" label="BMI1 (interacts with) ALG10B" source="105726" target="105727" cy:directed="1"/>
      <edge id="106078" label="BCAT1 (interacts with) B3GNT5" source="105725" target="105707" cy:directed="1"/>
      <edge id="106077" label="BATF3 (interacts with) HAS1" source="105723" target="105708" cy:directed="1"/>
      <edge id="106076" label="BATF3 (interacts with) B3GNT5" source="105723" target="105707" cy:directed="1"/>
      <edge id="106075" label="BATF3 (interacts with) CHST11" source="105723" target="105718" cy:directed="1"/>
      <edge id="106074" label="BATF3 (interacts with) MGAT1" source="105723" target="105724" cy:directed="1"/>
      <edge id="106073" label="BATF (interacts with) DPM3" source="105721" target="105722" cy:directed="1"/>
      <edge id="106072" label="BACH1 (interacts with) ST6GAL2" source="105714" target="105720" cy:directed="1"/>
      <edge id="106071" label="BACH1 (interacts with) GFPT2" source="105714" target="105719" cy:directed="1"/>
      <edge id="106070" label="BACH1 (interacts with) CHST11" source="105714" target="105718" cy:directed="1"/>
      <edge id="106069" label="BACH1 (interacts with) B3GNT5" source="105714" target="105707" cy:directed="1"/>
      <edge id="106068" label="BACH1 (interacts with) CHSY1" source="105714" target="105717" cy:directed="1"/>
      <edge id="106067" label="BACH1 (interacts with) MAN1A1" source="105714" target="105716" cy:directed="1"/>
      <edge id="106066" label="BACH1 (interacts with) FUT11" source="105714" target="105690" cy:directed="1"/>
      <edge id="106065" label="BACH1 (interacts with) MAN1A2" source="105714" target="105687" cy:directed="1"/>
      <edge id="106064" label="BACH1 (interacts with) CSGALNACT2" source="105714" target="105715" cy:directed="1"/>
      <edge id="106063" label="ATRX (interacts with) FKTN" source="105712" target="105713" cy:directed="1"/>
      <edge id="106062" label="ATF7IP (interacts with) ALG10" source="105710" target="105711" cy:directed="1"/>
      <edge id="106061" label="ATF3 (interacts with) HAS2" source="105706" target="105709" cy:directed="1"/>
      <edge id="106060" label="ATF3 (interacts with) HAS1" source="105706" target="105708" cy:directed="1"/>
      <edge id="106059" label="ATF3 (interacts with) B3GNT5" source="105706" target="105707" cy:directed="1"/>
      <edge id="106058" label="ATF2 (interacts with) UGGT1" source="105704" target="105705" cy:directed="1"/>
      <edge id="106057" label="ATF2 (interacts with) SLC35F5" source="105704" target="105696" cy:directed="1"/>
      <edge id="106056" label="ATF2 (interacts with) FUT11" source="105704" target="105690" cy:directed="1"/>
      <edge id="106055" label="ATF2 (interacts with) MAN2A1" source="105704" target="105694" cy:directed="1"/>
      <edge id="106054" label="ATF2 (interacts with) MAN1A2" source="105704" target="105687" cy:directed="1"/>
      <edge id="106053" label="ATF1 (interacts with) GALNT4" source="105701" target="105703" cy:directed="1"/>
      <edge id="106052" label="ATF1 (interacts with) MAN2A1" source="105701" target="105694" cy:directed="1"/>
      <edge id="106051" label="ATF1 (interacts with) SLC35F5" source="105701" target="105696" cy:directed="1"/>
      <edge id="106050" label="ATF1 (interacts with) SLC35A3" source="105701" target="105695" cy:directed="1"/>
      <edge id="106049" label="ATF1 (interacts with) SLC35A5" source="105701" target="105702" cy:directed="1"/>
      <edge id="106048" label="ARID2 (interacts with) RTF1" source="105699" target="105700" cy:directed="1"/>
      <edge id="106047" label="AR (interacts with) ST8SIA6" source="105693" target="105698" cy:directed="1"/>
      <edge id="106046" label="AR (interacts with) GALNT10" source="105693" target="105697" cy:directed="1"/>
      <edge id="106045" label="AR (interacts with) SLC35F5" source="105693" target="105696" cy:directed="1"/>
      <edge id="106044" label="AR (interacts with) NEU3" source="105693" target="105689" cy:directed="1"/>
      <edge id="106043" label="AR (interacts with) SLC35A3" source="105693" target="105695" cy:directed="1"/>
      <edge id="106042" label="AR (interacts with) FUT11" source="105693" target="105690" cy:directed="1"/>
      <edge id="106041" label="AR (interacts with) ACER2" source="105693" target="105691" cy:directed="1"/>
      <edge id="106040" label="AR (interacts with) MAN2A1" source="105693" target="105694" cy:directed="1"/>
      <edge id="106039" label="AFF4 (interacts with) COG5" source="105686" target="105692" cy:directed="1"/>
      <edge id="106038" label="AFF4 (interacts with) ACER2" source="105686" target="105691" cy:directed="1"/>
      <edge id="106037" label="AFF4 (interacts with) FUT11" source="105686" target="105690" cy:directed="1"/>
      <edge id="106036" label="AFF4 (interacts with) NEU3" source="105686" target="105689" cy:directed="1"/>
      <edge id="106035" label="AFF4 (interacts with) STT3B" source="105686" target="105688" cy:directed="1"/>
      <edge id="106034" label="AFF4 (interacts with) MAN1A2" source="105686" target="105687" cy:directed="1"/>
      <edge id="106033" label="ADNP (interacts with) FUT7" source="105684" target="105685" cy:directed="1"/>
    </graph>
  </att>
  <att>
    <graph id="106825" label="Basal Breast" cy:registered="1">
      <node xlink:href="#106029"/>
      <node id="106894" label="ZBTB10"/>
      <node id="106893" label="STT3A"/>
      <node xlink:href="#106026"/>
      <node xlink:href="#106023"/>
      <node xlink:href="#105789"/>
      <node xlink:href="#106021"/>
      <node id="106892" label="COG4"/>
      <node id="106891" label="COG8"/>
      <node id="106890" label="THAP11"/>
      <node xlink:href="#106016"/>
      <node xlink:href="#106013"/>
      <node xlink:href="#106011"/>
      <node xlink:href="#106007"/>
      <node id="106889" label="TBX21"/>
      <node xlink:href="#105771"/>
      <node xlink:href="#106006"/>
      <node xlink:href="#106002"/>
      <node xlink:href="#106001"/>
      <node xlink:href="#106000"/>
      <node xlink:href="#105999"/>
      <node xlink:href="#105994"/>
      <node xlink:href="#105838"/>
      <node id="106888" label="SPIB"/>
      <node xlink:href="#105993"/>
      <node xlink:href="#105811"/>
      <node xlink:href="#105807"/>
      <node id="106887" label="EXTL1"/>
      <node xlink:href="#105991"/>
      <node xlink:href="#105990"/>
      <node xlink:href="#105989"/>
      <node xlink:href="#106014"/>
      <node id="106886" label="SMAD2"/>
      <node xlink:href="#105986"/>
      <node xlink:href="#105722"/>
      <node xlink:href="#105759"/>
      <node id="106885" label="SIRT6"/>
      <node xlink:href="#105984"/>
      <node xlink:href="#105982"/>
      <node xlink:href="#105981"/>
      <node xlink:href="#105975"/>
      <node xlink:href="#105703"/>
      <node xlink:href="#105974"/>
      <node xlink:href="#105970"/>
      <node xlink:href="#105969"/>
      <node xlink:href="#105905"/>
      <node xlink:href="#105824"/>
      <node xlink:href="#105968"/>
      <node xlink:href="#105967"/>
      <node id="106884" label="RARA"/>
      <node xlink:href="#105964"/>
      <node xlink:href="#105963"/>
      <node xlink:href="#105718"/>
      <node id="106883" label="SULF1"/>
      <node xlink:href="#105962"/>
      <node id="106882" label="GFPT1"/>
      <node id="106881" label="PPARA"/>
      <node id="106880" label="POU2F2"/>
      <node xlink:href="#105960"/>
      <node xlink:href="#105959"/>
      <node xlink:href="#105958"/>
      <node id="106879" label="ALG6"/>
      <node xlink:href="#105957"/>
      <node xlink:href="#105955"/>
      <node xlink:href="#105949"/>
      <node xlink:href="#105948"/>
      <node xlink:href="#105947"/>
      <node xlink:href="#105762"/>
      <node xlink:href="#105747"/>
      <node xlink:href="#105946"/>
      <node xlink:href="#105943"/>
      <node xlink:href="#105937"/>
      <node xlink:href="#105802"/>
      <node xlink:href="#105934"/>
      <node xlink:href="#105933"/>
      <node xlink:href="#105932"/>
      <node xlink:href="#105931"/>
      <node id="106878" label="MEIS3"/>
      <node xlink:href="#105926"/>
      <node id="106877" label="MEF2B"/>
      <node xlink:href="#105717"/>
      <node xlink:href="#105925"/>
      <node xlink:href="#105924"/>
      <node xlink:href="#105916"/>
      <node xlink:href="#105914"/>
      <node id="106876" label="MAF"/>
      <node xlink:href="#106030"/>
      <node xlink:href="#105749"/>
      <node xlink:href="#105777"/>
      <node xlink:href="#105911"/>
      <node id="106875" label="LEF1"/>
      <node xlink:href="#105904"/>
      <node id="106874" label="KDM4A"/>
      <node xlink:href="#105903"/>
      <node xlink:href="#105844"/>
      <node id="106873" label="KDM1B"/>
      <node xlink:href="#106005"/>
      <node xlink:href="#105894"/>
      <node xlink:href="#105892"/>
      <node xlink:href="#105891"/>
      <node xlink:href="#105779"/>
      <node xlink:href="#105884"/>
      <node xlink:href="#105890"/>
      <node xlink:href="#105889"/>
      <node xlink:href="#105888"/>
      <node xlink:href="#105782"/>
      <node id="106872" label="IRF3"/>
      <node id="106871" label="IRF2"/>
      <node xlink:href="#105859"/>
      <node xlink:href="#105887"/>
      <node xlink:href="#105841"/>
      <node xlink:href="#105700"/>
      <node xlink:href="#105885"/>
      <node xlink:href="#105860"/>
      <node xlink:href="#105776"/>
      <node xlink:href="#105882"/>
      <node xlink:href="#105917"/>
      <node xlink:href="#105879"/>
      <node id="106870" label="HOXB4"/>
      <node id="106869" label="GALC"/>
      <node id="106868" label="MGAT2"/>
      <node id="106867" label="HIF1A"/>
      <node xlink:href="#105876"/>
      <node xlink:href="#105875"/>
      <node xlink:href="#105873"/>
      <node xlink:href="#105872"/>
      <node xlink:href="#105871"/>
      <node id="106866" label="GRHL1"/>
      <node id="106865" label="GPS2"/>
      <node xlink:href="#105867"/>
      <node xlink:href="#105791"/>
      <node xlink:href="#105866"/>
      <node id="106864" label="GPI"/>
      <node id="106863" label="GAPDH"/>
      <node xlink:href="#105861"/>
      <node id="106862" label="FUS"/>
      <node xlink:href="#105858"/>
      <node id="106861" label="CHST15"/>
      <node xlink:href="#105856"/>
      <node id="106860" label="MGAT4A"/>
      <node id="106859" label="GALNT7"/>
      <node xlink:href="#105850"/>
      <node id="106858" label="GCNT4"/>
      <node id="106857" label="ST3GAL5"/>
      <node id="106856" label="FUCA1"/>
      <node id="106855" label="ST6GAL1"/>
      <node xlink:href="#105848"/>
      <node xlink:href="#105834"/>
      <node xlink:href="#105839"/>
      <node id="106854" label="XYLT1"/>
      <node xlink:href="#105835"/>
      <node id="106853" label="MAN1C1"/>
      <node xlink:href="#105833"/>
      <node xlink:href="#105766"/>
      <node xlink:href="#105832"/>
      <node xlink:href="#105830"/>
      <node xlink:href="#105805"/>
      <node id="106852" label="ELL2"/>
      <node xlink:href="#105731"/>
      <node xlink:href="#105827"/>
      <node xlink:href="#105826"/>
      <node xlink:href="#105825"/>
      <node xlink:href="#105823"/>
      <node xlink:href="#105822"/>
      <node xlink:href="#105784"/>
      <node xlink:href="#105821"/>
      <node id="106851" label="GALT"/>
      <node xlink:href="#105813"/>
      <node xlink:href="#105716"/>
      <node xlink:href="#105804"/>
      <node xlink:href="#105707"/>
      <node xlink:href="#105795"/>
      <node id="106850" label="DCP1A"/>
      <node xlink:href="#105794"/>
      <node xlink:href="#105874"/>
      <node xlink:href="#105786"/>
      <node xlink:href="#105781"/>
      <node xlink:href="#105780"/>
      <node id="106849" label="CLOCK"/>
      <node xlink:href="#105775"/>
      <node xlink:href="#105774"/>
      <node xlink:href="#105998"/>
      <node xlink:href="#105773"/>
      <node xlink:href="#105893"/>
      <node xlink:href="#105748"/>
      <node xlink:href="#105770"/>
      <node xlink:href="#105769"/>
      <node xlink:href="#105880"/>
      <node xlink:href="#105746"/>
      <node xlink:href="#105758"/>
      <node xlink:href="#105757"/>
      <node xlink:href="#105756"/>
      <node id="106848" label="CDK12"/>
      <node xlink:href="#105755"/>
      <node xlink:href="#105753"/>
      <node xlink:href="#105744"/>
      <node xlink:href="#105752"/>
      <node id="106847" label="CBX6"/>
      <node xlink:href="#105806"/>
      <node id="106846" label="LFNG"/>
      <node id="106845" label="CBFA2T3"/>
      <node xlink:href="#105727"/>
      <node xlink:href="#105738"/>
      <node xlink:href="#105754"/>
      <node xlink:href="#105736"/>
      <node id="106844" label="SLC35E1"/>
      <node id="106843" label="BRD4"/>
      <node id="106842" label="UGT8"/>
      <node id="106841" label="BCL11A"/>
      <node id="106840" label="TPST2"/>
      <node xlink:href="#105724"/>
      <node xlink:href="#105723"/>
      <node xlink:href="#105912"/>
      <node id="106839" label="ST6GALNAC4"/>
      <node xlink:href="#105763"/>
      <node xlink:href="#105765"/>
      <node xlink:href="#105721"/>
      <node id="106838" label="B3GNT2"/>
      <node xlink:href="#105715"/>
      <node xlink:href="#105714"/>
      <node xlink:href="#105712"/>
      <node xlink:href="#105711"/>
      <node xlink:href="#105710"/>
      <node xlink:href="#105713"/>
      <node xlink:href="#105704"/>
      <node xlink:href="#105701"/>
      <node xlink:href="#105883"/>
      <node id="106837" label="ASCL2"/>
      <node xlink:href="#105709"/>
      <node id="106836" label="AHR"/>
      <node id="106835" label="PIGK"/>
      <node xlink:href="#105906"/>
      <node xlink:href="#105696"/>
      <node xlink:href="#105702"/>
      <node xlink:href="#105950"/>
      <node xlink:href="#105695"/>
      <node xlink:href="#105705"/>
      <node xlink:href="#105697"/>
      <node xlink:href="#105985"/>
      <node xlink:href="#105692"/>
      <node xlink:href="#105691"/>
      <node xlink:href="#105694"/>
      <node xlink:href="#105690"/>
      <node xlink:href="#105689"/>
      <node xlink:href="#105688"/>
      <node xlink:href="#105687"/>
      <node xlink:href="#105686"/>
      <node xlink:href="#105685"/>
      <node xlink:href="#105684"/>
      <edge id="107262" label="ZBTB17 (interacts with) NAGK" source="106029" target="105765" cy:directed="1"/>
      <edge id="107261" label="ZBTB17 (interacts with) B3GAT3" source="106029" target="105754" cy:directed="1"/>
      <edge id="107260" label="ZBTB10 (interacts with) SLC35F5" source="106894" target="105696" cy:directed="1"/>
      <edge id="107259" label="YAP1 (interacts with) STT3A" source="106026" target="106893" cy:directed="1"/>
      <edge id="107258" label="VEZF1 (interacts with) SLC35A5" source="106023" target="105702" cy:directed="1"/>
      <edge id="107257" label="USF1 (interacts with) CHST12" source="106021" target="105763" cy:directed="1"/>
      <edge id="107256" label="USF1 (interacts with) GALT" source="106021" target="106851" cy:directed="1"/>
      <edge id="107255" label="USF1 (interacts with) B4GALT3" source="106021" target="105789" cy:directed="1"/>
      <edge id="107254" label="USF1 (interacts with) DPM3" source="106021" target="105722" cy:directed="1"/>
      <edge id="107253" label="THAP11 (interacts with) COG4" source="106890" target="106892" cy:directed="1"/>
      <edge id="107252" label="THAP11 (interacts with) COG8" source="106890" target="106891" cy:directed="1"/>
      <edge id="107251" label="TET2 (interacts with) HS2ST1" source="106016" target="105906" cy:directed="1"/>
      <edge id="107250" label="TET2 (interacts with) UGCG" source="106016" target="105985" cy:directed="1"/>
      <edge id="107249" label="TET2 (interacts with) ACER2" source="106016" target="105691" cy:directed="1"/>
      <edge id="107248" label="TET2 (interacts with) STT3B" source="106016" target="105688" cy:directed="1"/>
      <edge id="107247" label="TET2 (interacts with) MAN1A2" source="106016" target="105687" cy:directed="1"/>
      <edge id="107246" label="TEAD1 (interacts with) GALNT1" source="106013" target="106014" cy:directed="1"/>
      <edge id="107245" label="TEAD1 (interacts with) UGGT1" source="106013" target="105705" cy:directed="1"/>
      <edge id="107244" label="TEAD1 (interacts with) EXTL2" source="106013" target="105844" cy:directed="1"/>
      <edge id="107243" label="TDRD3 (interacts with) COG6" source="106011" target="105824" cy:directed="1"/>
      <edge id="107242" label="TCF12 (interacts with) ACER2" source="106007" target="105691" cy:directed="1"/>
      <edge id="107241" label="TCF12 (interacts with) MAN2A1" source="106007" target="105694" cy:directed="1"/>
      <edge id="107240" label="TCF12 (interacts with) SLC35A5" source="106007" target="105702" cy:directed="1"/>
      <edge id="107239" label="TCF12 (interacts with) UGGT1" source="106007" target="105705" cy:directed="1"/>
      <edge id="107238" label="TCF12 (interacts with) COG5" source="106007" target="105692" cy:directed="1"/>
      <edge id="107237" label="TCF12 (interacts with) STT3B" source="106007" target="105688" cy:directed="1"/>
      <edge id="107236" label="TCF12 (interacts with) FUT11" source="106007" target="105690" cy:directed="1"/>
      <edge id="107235" label="TBX21 (interacts with) TPST2" source="106889" target="106840" cy:directed="1"/>
      <edge id="107234" label="TBX21 (interacts with) LFNG" source="106889" target="106846" cy:directed="1"/>
      <edge id="107233" label="TBX21 (interacts with) GM2A" source="106889" target="105883" cy:directed="1"/>
      <edge id="107232" label="TBX21 (interacts with) FUT7" source="106889" target="105685" cy:directed="1"/>
      <edge id="107231" label="TAF1 (interacts with) UGGT1" source="106006" target="105705" cy:directed="1"/>
      <edge id="107230" label="TAF1 (interacts with) SLC35D1" source="106006" target="105950" cy:directed="1"/>
      <edge id="107229" label="TAF1 (interacts with) FKTN" source="106006" target="105713" cy:directed="1"/>
      <edge id="107228" label="TAF1 (interacts with) ALG10B" source="106006" target="105727" cy:directed="1"/>
      <edge id="107227" label="TAF1 (interacts with) ACER2" source="106006" target="105691" cy:directed="1"/>
      <edge id="107226" label="TAF1 (interacts with) UGCG" source="106006" target="105985" cy:directed="1"/>
      <edge id="107225" label="TAF1 (interacts with) STT3B" source="106006" target="105688" cy:directed="1"/>
      <edge id="107224" label="TAF1 (interacts with) OGT" source="106006" target="105771" cy:directed="1"/>
      <edge id="107223" label="TAF1 (interacts with) MAN1A2" source="106006" target="105687" cy:directed="1"/>
      <edge id="107222" label="TAF1 (interacts with) NEU3" source="106006" target="105689" cy:directed="1"/>
      <edge id="107221" label="STAT4 (interacts with) ST8SIA4" source="106002" target="105834" cy:directed="1"/>
      <edge id="107220" label="STAT4 (interacts with) FUT7" source="106002" target="105685" cy:directed="1"/>
      <edge id="107219" label="STAT2 (interacts with) LAMP3" source="106001" target="105776" cy:directed="1"/>
      <edge id="107218" label="STAT1 (interacts with) HPSE" source="105999" target="106000" cy:directed="1"/>
      <edge id="107217" label="STAT1 (interacts with) LAMP3" source="105999" target="105776" cy:directed="1"/>
      <edge id="107216" label="SRCAP (interacts with) COG7" source="105994" target="105791" cy:directed="1"/>
      <edge id="107215" label="SPIB (interacts with) CHST2" source="106888" target="105838" cy:directed="1"/>
      <edge id="107214" label="SPIB (interacts with) FUT7" source="106888" target="105685" cy:directed="1"/>
      <edge id="107213" label="SPDEF (interacts with) GALNT7" source="105993" target="106859" cy:directed="1"/>
      <edge id="107212" label="SOX10 (interacts with) ST3GAL6" source="105991" target="105811" cy:directed="1"/>
      <edge id="107211" label="SOX10 (interacts with) CHST3" source="105991" target="105807" cy:directed="1"/>
      <edge id="107210" label="SOX10 (interacts with) EXTL1" source="105991" target="106887" cy:directed="1"/>
      <edge id="107209" label="SMC3 (interacts with) NEU3" source="105990" target="105689" cy:directed="1"/>
      <edge id="107208" label="SMC1A (interacts with) NEU3" source="105989" target="105689" cy:directed="1"/>
      <edge id="107207" label="SMAD2 (interacts with) GALNT1" source="106886" target="106014" cy:directed="1"/>
      <edge id="107206" label="SIX5 (interacts with) GALK1" source="105986" target="105753" cy:directed="1"/>
      <edge id="107205" label="SIX5 (interacts with) DPM3" source="105986" target="105722" cy:directed="1"/>
      <edge id="107204" label="SIX5 (interacts with) B4GALT7" source="105986" target="105782" cy:directed="1"/>
      <edge id="107203" label="SIX5 (interacts with) PIGQ" source="105986" target="105759" cy:directed="1"/>
      <edge id="107202" label="SIRT6 (interacts with) NAGK" source="106885" target="105765" cy:directed="1"/>
      <edge id="107201" label="SIRT6 (interacts with) B4GALNT4" source="106885" target="105784" cy:directed="1"/>
      <edge id="107200" label="SIRT6 (interacts with) IDUA" source="106885" target="105749" cy:directed="1"/>
      <edge id="107199" label="SIRT6 (interacts with) B3GALT6" source="106885" target="105781" cy:directed="1"/>
      <edge id="107198" label="SIRT6 (interacts with) GALK1" source="106885" target="105753" cy:directed="1"/>
      <edge id="107197" label="SIRT6 (interacts with) DPM3" source="106885" target="105722" cy:directed="1"/>
      <edge id="107196" label="SIRT6 (interacts with) B4GALT7" source="106885" target="105782" cy:directed="1"/>
      <edge id="107195" label="SIRT6 (interacts with) PIGQ" source="106885" target="105759" cy:directed="1"/>
      <edge id="107194" label="SIRT6 (interacts with) RFNG" source="106885" target="105744" cy:directed="1"/>
      <edge id="107193" label="SIRT6 (interacts with) B3GAT3" source="106885" target="105754" cy:directed="1"/>
      <edge id="107192" label="SIRT6 (interacts with) DPM2" source="106885" target="105758" cy:directed="1"/>
      <edge id="107191" label="SIN3A (interacts with) NEU3" source="105984" target="105689" cy:directed="1"/>
      <edge id="107190" label="RUNX3 (interacts with) FUT7" source="105982" target="105685" cy:directed="1"/>
      <edge id="107189" label="RUNX2 (interacts with) TPST2" source="105981" target="106840" cy:directed="1"/>
      <edge id="107188" label="RUNX2 (interacts with) GALNT10" source="105981" target="105697" cy:directed="1"/>
      <edge id="107187" label="RUNX2 (interacts with) CHST15" source="105981" target="106861" cy:directed="1"/>
      <edge id="107186" label="RNF2 (interacts with) B3GNT5" source="105975" target="105707" cy:directed="1"/>
      <edge id="107185" label="RFX7 (interacts with) GALNT4" source="105974" target="105703" cy:directed="1"/>
      <edge id="107184" label="RFX7 (interacts with) NEU3" source="105974" target="105689" cy:directed="1"/>
      <edge id="107183" label="REST (interacts with) FUT11" source="105970" target="105690" cy:directed="1"/>
      <edge id="107182" label="RCOR1 (interacts with) UGGT1" source="105969" target="105705" cy:directed="1"/>
      <edge id="107181" label="RCOR1 (interacts with) MAN1A2" source="105969" target="105687" cy:directed="1"/>
      <edge id="107180" label="RCOR1 (interacts with) FKTN" source="105969" target="105713" cy:directed="1"/>
      <edge id="107179" label="RCOR1 (interacts with) MAN2A1" source="105969" target="105694" cy:directed="1"/>
      <edge id="107178" label="RBL2 (interacts with) GNS" source="105968" target="105905" cy:directed="1"/>
      <edge id="107177" label="RBL2 (interacts with) MAN1A2" source="105968" target="105687" cy:directed="1"/>
      <edge id="107176" label="RBL2 (interacts with) COG6" source="105968" target="105824" cy:directed="1"/>
      <edge id="107175" label="RBL2 (interacts with) MAN2A1" source="105968" target="105694" cy:directed="1"/>
      <edge id="107174" label="RBBP5 (interacts with) SLC35A5" source="105967" target="105702" cy:directed="1"/>
      <edge id="107173" label="RBBP5 (interacts with) FKTN" source="105967" target="105713" cy:directed="1"/>
      <edge id="107172" label="RBBP5 (interacts with) HS2ST1" source="105967" target="105906" cy:directed="1"/>
      <edge id="107171" label="RBBP5 (interacts with) NEU3" source="105967" target="105689" cy:directed="1"/>
      <edge id="107170" label="RBBP5 (interacts with) SLC35A3" source="105967" target="105695" cy:directed="1"/>
      <edge id="107169" label="RBBP5 (interacts with) UGGT1" source="105967" target="105705" cy:directed="1"/>
      <edge id="107168" label="RBBP5 (interacts with) FAM20B" source="105967" target="105731" cy:directed="1"/>
      <edge id="107167" label="RBBP5 (interacts with) MAN1A2" source="105967" target="105687" cy:directed="1"/>
      <edge id="107166" label="RARA (interacts with) LFNG" source="106884" target="106846" cy:directed="1"/>
      <edge id="107165" label="RAC3 (interacts with) GALK1" source="105964" target="105753" cy:directed="1"/>
      <edge id="107164" label="PRKDC (interacts with) NEU3" source="105963" target="105689" cy:directed="1"/>
      <edge id="107163" label="PRDM1 (interacts with) NPL" source="105962" target="105860" cy:directed="1"/>
      <edge id="107162" label="PRDM1 (interacts with) CHST11" source="105962" target="105718" cy:directed="1"/>
      <edge id="107161" label="PRDM1 (interacts with) SULF1" source="105962" target="106883" cy:directed="1"/>
      <edge id="107160" label="PPARA (interacts with) GFPT1" source="106881" target="106882" cy:directed="1"/>
      <edge id="107159" label="POU2F2 (interacts with) MAN1A1" source="106880" target="105716" cy:directed="1"/>
      <edge id="107158" label="POLR3A (interacts with) FUT11" source="105960" target="105690" cy:directed="1"/>
      <edge id="107157" label="POLR2B (interacts with) NEU3" source="105959" target="105689" cy:directed="1"/>
      <edge id="107156" label="POLR2B (interacts with) FKTN" source="105959" target="105713" cy:directed="1"/>
      <edge id="107155" label="PIAS1 (interacts with) SLC35A5" source="105958" target="105702" cy:directed="1"/>
      <edge id="107154" label="PIAS1 (interacts with) UGCG" source="105958" target="105985" cy:directed="1"/>
      <edge id="107153" label="PIAS1 (interacts with) MGAT5" source="105958" target="105893" cy:directed="1"/>
      <edge id="107152" label="PHF6 (interacts with) ALG6" source="105957" target="106879" cy:directed="1"/>
      <edge id="107151" label="PHF6 (interacts with) FAM20B" source="105957" target="105731" cy:directed="1"/>
      <edge id="107150" label="PCGF1 (interacts with) RFNG" source="105955" target="105744" cy:directed="1"/>
      <edge id="107149" label="NR2C2 (interacts with) ALG10B" source="105949" target="105727" cy:directed="1"/>
      <edge id="107148" label="NR2C2 (interacts with) FKTN" source="105949" target="105713" cy:directed="1"/>
      <edge id="107147" label="NR2C2 (interacts with) STT3B" source="105949" target="105688" cy:directed="1"/>
      <edge id="107146" label="NPAT (interacts with) FUT11" source="105948" target="105690" cy:directed="1"/>
      <edge id="107145" label="NIPBL (interacts with) SLC35A3" source="105947" target="105695" cy:directed="1"/>
      <edge id="107144" label="NIPBL (interacts with) ACER2" source="105947" target="105691" cy:directed="1"/>
      <edge id="107143" label="NIPBL (interacts with) UGCG" source="105947" target="105985" cy:directed="1"/>
      <edge id="107142" label="NIPBL (interacts with) MAN2A1" source="105947" target="105694" cy:directed="1"/>
      <edge id="107141" label="NIPBL (interacts with) COG5" source="105947" target="105692" cy:directed="1"/>
      <edge id="107140" label="NIPBL (interacts with) MGAT5" source="105947" target="105893" cy:directed="1"/>
      <edge id="107139" label="NIPBL (interacts with) UGGT1" source="105947" target="105705" cy:directed="1"/>
      <edge id="107138" label="NIPBL (interacts with) NEU3" source="105947" target="105689" cy:directed="1"/>
      <edge id="107137" label="NFYC (interacts with) MOGS" source="105946" target="105762" cy:directed="1"/>
      <edge id="107136" label="NFYC (interacts with) ST3GAL3" source="105946" target="105747" cy:directed="1"/>
      <edge id="107135" label="NFAT5 (interacts with) COG5" source="105943" target="105692" cy:directed="1"/>
      <edge id="107134" label="MYH11 (interacts with) XYLT1" source="105937" target="106854" cy:directed="1"/>
      <edge id="107133" label="MYBL1 (interacts with) FUT1" source="105934" target="105802" cy:directed="1"/>
      <edge id="107132" label="MXD3 (interacts with) NAGK" source="105933" target="105765" cy:directed="1"/>
      <edge id="107131" label="MXD3 (interacts with) B3GAT3" source="105933" target="105754" cy:directed="1"/>
      <edge id="107130" label="MSX1 (interacts with) ST3GAL2" source="105932" target="105806" cy:directed="1"/>
      <edge id="107129" label="MRE11A (interacts with) NEU3" source="105931" target="105689" cy:directed="1"/>
      <edge id="107128" label="MEIS3 (interacts with) ST3GAL2" source="106878" target="105806" cy:directed="1"/>
      <edge id="107127" label="MEF2C (interacts with) XYLT1" source="105926" target="106854" cy:directed="1"/>
      <edge id="107126" label="MEF2C (interacts with) GALNT10" source="105926" target="105697" cy:directed="1"/>
      <edge id="107125" label="MEF2C (interacts with) MAN1A1" source="105926" target="105716" cy:directed="1"/>
      <edge id="107124" label="MEF2B (interacts with) ST6GALNAC4" source="106877" target="106839" cy:directed="1"/>
      <edge id="107123" label="MEF2B (interacts with) CHST12" source="106877" target="105763" cy:directed="1"/>
      <edge id="107122" label="MEF2A (interacts with) XYLT1" source="105925" target="106854" cy:directed="1"/>
      <edge id="107121" label="MEF2A (interacts with) CHSY1" source="105925" target="105717" cy:directed="1"/>
      <edge id="107120" label="MED1 (interacts with) FUT11" source="105924" target="105690" cy:directed="1"/>
      <edge id="107119" label="MAZ (interacts with) B4GALNT4" source="105916" target="105784" cy:directed="1"/>
      <edge id="107118" label="MAZ (interacts with) B3GAT3" source="105916" target="105754" cy:directed="1"/>
      <edge id="107117" label="MAZ (interacts with) B4GALT2" source="105916" target="105917" cy:directed="1"/>
      <edge id="107116" label="MAFB (interacts with) GALNT10" source="105914" target="105697" cy:directed="1"/>
      <edge id="107115" label="MAFB (interacts with) DSE" source="105914" target="105779" cy:directed="1"/>
      <edge id="107114" label="MAF (interacts with) TPST2" source="106876" target="106840" cy:directed="1"/>
      <edge id="107113" label="MAF (interacts with) ST8SIA4" source="106876" target="105834" cy:directed="1"/>
      <edge id="107112" label="LYL1 (interacts with) B3GALT4" source="105911" target="106030" cy:directed="1"/>
      <edge id="107111" label="LYL1 (interacts with) ST6GALNAC4" source="105911" target="106839" cy:directed="1"/>
      <edge id="107110" label="LYL1 (interacts with) NAGK" source="105911" target="105765" cy:directed="1"/>
      <edge id="107109" label="LYL1 (interacts with) IDUA" source="105911" target="105749" cy:directed="1"/>
      <edge id="107108" label="LYL1 (interacts with) ST3GAL2" source="105911" target="105806" cy:directed="1"/>
      <edge id="107107" label="LYL1 (interacts with) ST6GALNAC6" source="105911" target="105746" cy:directed="1"/>
      <edge id="107106" label="LYL1 (interacts with) CHST12" source="105911" target="105763" cy:directed="1"/>
      <edge id="107105" label="LYL1 (interacts with) RENBP" source="105911" target="105912" cy:directed="1"/>
      <edge id="107104" label="LYL1 (interacts with) MGAT1" source="105911" target="105724" cy:directed="1"/>
      <edge id="107103" label="LYL1 (interacts with) MAN2B1" source="105911" target="105777" cy:directed="1"/>
      <edge id="107102" label="LYL1 (interacts with) FUT7" source="105911" target="105685" cy:directed="1"/>
      <edge id="107101" label="LYL1 (interacts with) MFNG" source="105911" target="105766" cy:directed="1"/>
      <edge id="107100" label="LEF1 (interacts with) GCNT4" source="106875" target="106858" cy:directed="1"/>
      <edge id="107099" label="LEF1 (interacts with) MFNG" source="106875" target="105766" cy:directed="1"/>
      <edge id="107098" label="LEF1 (interacts with) ST8SIA4" source="106875" target="105834" cy:directed="1"/>
      <edge id="107097" label="KDM5A (interacts with) NEU3" source="105904" target="105689" cy:directed="1"/>
      <edge id="107096" label="KDM4A (interacts with) GANAB" source="106874" target="105998" cy:directed="1"/>
      <edge id="107095" label="KDM3A (interacts with) SLC35A3" source="105903" target="105695" cy:directed="1"/>
      <edge id="107094" label="KDM1B (interacts with) EXTL2" source="106873" target="105844" cy:directed="1"/>
      <edge id="107093" label="JMJD6 (interacts with) COG1" source="105894" target="106005" cy:directed="1"/>
      <edge id="107092" label="JMJD6 (interacts with) GALK1" source="105894" target="105753" cy:directed="1"/>
      <edge id="107091" label="JMJD6 (interacts with) RFNG" source="105894" target="105744" cy:directed="1"/>
      <edge id="107090" label="JMJD1C (interacts with) SLC35A3" source="105892" target="105695" cy:directed="1"/>
      <edge id="107089" label="JMJD1C (interacts with) COG5" source="105892" target="105692" cy:directed="1"/>
      <edge id="107088" label="JMJD1C (interacts with) SLC35A5" source="105892" target="105702" cy:directed="1"/>
      <edge id="107087" label="JMJD1C (interacts with) CSGALNACT2" source="105892" target="105715" cy:directed="1"/>
      <edge id="107086" label="JMJD1C (interacts with) FUT11" source="105892" target="105690" cy:directed="1"/>
      <edge id="107085" label="JDP2 (interacts with) MGAT1" source="105891" target="105724" cy:directed="1"/>
      <edge id="107084" label="IRF8 (interacts with) TPST2" source="105890" target="106840" cy:directed="1"/>
      <edge id="107083" label="IRF8 (interacts with) DSE" source="105890" target="105779" cy:directed="1"/>
      <edge id="107082" label="IRF8 (interacts with) ST6GAL1" source="105890" target="106855" cy:directed="1"/>
      <edge id="107081" label="IRF8 (interacts with) GM2A" source="105890" target="105883" cy:directed="1"/>
      <edge id="107080" label="IRF8 (interacts with) FUCA1" source="105890" target="106856" cy:directed="1"/>
      <edge id="107079" label="IRF8 (interacts with) LIPA" source="105890" target="105884" cy:directed="1"/>
      <edge id="107078" label="IRF8 (interacts with) ST8SIA4" source="105890" target="105834" cy:directed="1"/>
      <edge id="107077" label="IRF8 (interacts with) HK3" source="105890" target="105859" cy:directed="1"/>
      <edge id="107076" label="IRF5 (interacts with) MGAT1" source="105889" target="105724" cy:directed="1"/>
      <edge id="107075" label="IRF5 (interacts with) FUT7" source="105889" target="105685" cy:directed="1"/>
      <edge id="107074" label="IRF5 (interacts with) HK3" source="105889" target="105859" cy:directed="1"/>
      <edge id="107073" label="IRF4 (interacts with) ST3GAL5" source="105888" target="106857" cy:directed="1"/>
      <edge id="107072" label="IRF3 (interacts with) MGAT1" source="106872" target="105724" cy:directed="1"/>
      <edge id="107071" label="IRF3 (interacts with) B4GALT7" source="106872" target="105782" cy:directed="1"/>
      <edge id="107070" label="IRF3 (interacts with) GALT" source="106872" target="106851" cy:directed="1"/>
      <edge id="107069" label="IRF3 (interacts with) GALK1" source="106872" target="105753" cy:directed="1"/>
      <edge id="107068" label="IRF3 (interacts with) B3GAT3" source="106872" target="105754" cy:directed="1"/>
      <edge id="107067" label="IRF2 (interacts with) ST8SIA4" source="106871" target="105834" cy:directed="1"/>
      <edge id="107066" label="IRF2 (interacts with) LAMP3" source="106871" target="105776" cy:directed="1"/>
      <edge id="107065" label="IRF1 (interacts with) HK3" source="105887" target="105859" cy:directed="1"/>
      <edge id="107064" label="INO80 (interacts with) HS3ST3B1" source="105885" target="105841" cy:directed="1"/>
      <edge id="107063" label="INO80 (interacts with) MAN2A1" source="105885" target="105694" cy:directed="1"/>
      <edge id="107062" label="INO80 (interacts with) RTF1" source="105885" target="105700" cy:directed="1"/>
      <edge id="107061" label="IKZF1 (interacts with) UGCG" source="105882" target="105985" cy:directed="1"/>
      <edge id="107060" label="IKZF1 (interacts with) NPL" source="105882" target="105860" cy:directed="1"/>
      <edge id="107059" label="IKZF1 (interacts with) FUCA1" source="105882" target="106856" cy:directed="1"/>
      <edge id="107058" label="IKZF1 (interacts with) ST6GAL1" source="105882" target="106855" cy:directed="1"/>
      <edge id="107057" label="IKZF1 (interacts with) ST3GAL5" source="105882" target="106857" cy:directed="1"/>
      <edge id="107056" label="IKZF1 (interacts with) LAMP3" source="105882" target="105776" cy:directed="1"/>
      <edge id="107055" label="IKZF1 (interacts with) ST8SIA4" source="105882" target="105834" cy:directed="1"/>
      <edge id="107054" label="IKZF1 (interacts with) MFNG" source="105882" target="105766" cy:directed="1"/>
      <edge id="107053" label="HSF1 (interacts with) B4GALT2" source="105879" target="105917" cy:directed="1"/>
      <edge id="107052" label="HSF1 (interacts with) RFNG" source="105879" target="105744" cy:directed="1"/>
      <edge id="107051" label="HSF1 (interacts with) TSTA3" source="105879" target="105880" cy:directed="1"/>
      <edge id="107050" label="HOXB4 (interacts with) MGAT1" source="106870" target="105724" cy:directed="1"/>
      <edge id="107049" label="HOXB4 (interacts with) LFNG" source="106870" target="106846" cy:directed="1"/>
      <edge id="107048" label="HOXB4 (interacts with) TPST2" source="106870" target="106840" cy:directed="1"/>
      <edge id="107047" label="HIF1A (interacts with) GALC" source="106867" target="106869" cy:directed="1"/>
      <edge id="107046" label="HIF1A (interacts with) MGAT2" source="106867" target="106868" cy:directed="1"/>
      <edge id="107045" label="HIF1A (interacts with) SLC35F5" source="106867" target="105696" cy:directed="1"/>
      <edge id="107044" label="HIF1A (interacts with) FUT11" source="106867" target="105690" cy:directed="1"/>
      <edge id="107043" label="HIF1A (interacts with) STT3B" source="106867" target="105688" cy:directed="1"/>
      <edge id="107042" label="HES4 (interacts with) GALK1" source="105876" target="105753" cy:directed="1"/>
      <edge id="107041" label="HECTD1 (interacts with) UGCG" source="105875" target="105985" cy:directed="1"/>
      <edge id="107040" label="HECTD1 (interacts with) FUT11" source="105875" target="105690" cy:directed="1"/>
      <edge id="107039" label="HCFC1 (interacts with) NEU3" source="105873" target="105689" cy:directed="1"/>
      <edge id="107038" label="H2AFX (interacts with) RFNG" source="105872" target="105744" cy:directed="1"/>
      <edge id="107037" label="H2AFX (interacts with) B3GAT3" source="105872" target="105754" cy:directed="1"/>
      <edge id="107036" label="GTF2I (interacts with) UGGT1" source="105871" target="105705" cy:directed="1"/>
      <edge id="107035" label="GTF2I (interacts with) COG5" source="105871" target="105692" cy:directed="1"/>
      <edge id="107034" label="GRHL1 (interacts with) B3GNT5" source="106866" target="105707" cy:directed="1"/>
      <edge id="107033" label="GPS2 (interacts with) CHST12" source="106865" target="105763" cy:directed="1"/>
      <edge id="107032" label="GPS2 (interacts with) NAGK" source="106865" target="105765" cy:directed="1"/>
      <edge id="107031" label="GPS2 (interacts with) GALK1" source="106865" target="105753" cy:directed="1"/>
      <edge id="107030" label="GLYR1 (interacts with) ALG1" source="105866" target="105867" cy:directed="1"/>
      <edge id="107029" label="GLYR1 (interacts with) COG7" source="105866" target="105791" cy:directed="1"/>
      <edge id="107028" label="GAPDH (interacts with) GPI" source="106863" target="106864" cy:directed="1"/>
      <edge id="107027" label="GABPA (interacts with) PIGK" source="105861" target="106835" cy:directed="1"/>
      <edge id="107026" label="GABPA (interacts with) ALG10B" source="105861" target="105727" cy:directed="1"/>
      <edge id="107025" label="FUS (interacts with) B3GAT3" source="106862" target="105754" cy:directed="1"/>
      <edge id="107024" label="FUS (interacts with) B4GALNT4" source="106862" target="105784" cy:directed="1"/>
      <edge id="107023" label="FOXP3 (interacts with) MFNG" source="105858" target="105766" cy:directed="1"/>
      <edge id="107022" label="FOXP3 (interacts with) ST8SIA4" source="105858" target="105834" cy:directed="1"/>
      <edge id="107021" label="FOXP3 (interacts with) FUT7" source="105858" target="105685" cy:directed="1"/>
      <edge id="107020" label="FOXO1 (interacts with) GCNT4" source="105856" target="106858" cy:directed="1"/>
      <edge id="107019" label="FOXO1 (interacts with) CHST15" source="105856" target="106861" cy:directed="1"/>
      <edge id="107018" label="FOXA1 (interacts with) LFNG" source="105850" target="106846" cy:directed="1"/>
      <edge id="107017" label="FOXA1 (interacts with) GALNT10" source="105850" target="105697" cy:directed="1"/>
      <edge id="107016" label="FOXA1 (interacts with) MGAT4A" source="105850" target="106860" cy:directed="1"/>
      <edge id="107015" label="FOXA1 (interacts with) GALNT7" source="105850" target="106859" cy:directed="1"/>
      <edge id="107014" label="FLI1 (interacts with) GCNT4" source="105848" target="106858" cy:directed="1"/>
      <edge id="107013" label="FLI1 (interacts with) TPST2" source="105848" target="106840" cy:directed="1"/>
      <edge id="107012" label="FLI1 (interacts with) ST3GAL5" source="105848" target="106857" cy:directed="1"/>
      <edge id="107011" label="FLI1 (interacts with) FUCA1" source="105848" target="106856" cy:directed="1"/>
      <edge id="107010" label="FLI1 (interacts with) MAN1C1" source="105848" target="106853" cy:directed="1"/>
      <edge id="107009" label="FLI1 (interacts with) FUT7" source="105848" target="105685" cy:directed="1"/>
      <edge id="107008" label="FLI1 (interacts with) ST6GAL1" source="105848" target="106855" cy:directed="1"/>
      <edge id="107007" label="FLI1 (interacts with) ST3GAL2" source="105848" target="105806" cy:directed="1"/>
      <edge id="107006" label="FLI1 (interacts with) ST8SIA4" source="105848" target="105834" cy:directed="1"/>
      <edge id="107005" label="FLI1 (interacts with) MFNG" source="105848" target="105766" cy:directed="1"/>
      <edge id="107004" label="ETS1 (interacts with) ST8SIA4" source="105839" target="105834" cy:directed="1"/>
      <edge id="107003" label="ETS1 (interacts with) MFNG" source="105839" target="105766" cy:directed="1"/>
      <edge id="107002" label="ERG (interacts with) MAN1A1" source="105832" target="105716" cy:directed="1"/>
      <edge id="107001" label="ERG (interacts with) XYLT1" source="105832" target="106854" cy:directed="1"/>
      <edge id="107000" label="ERG (interacts with) CHST7" source="105832" target="105835" cy:directed="1"/>
      <edge id="106999" label="ERG (interacts with) MAN1C1" source="105832" target="106853" cy:directed="1"/>
      <edge id="106998" label="ERG (interacts with) CHSY3" source="105832" target="105833" cy:directed="1"/>
      <edge id="106997" label="ERG (interacts with) MFNG" source="105832" target="105766" cy:directed="1"/>
      <edge id="106996" label="ERCC6 (interacts with) CSGALNACT2" source="105830" target="105715" cy:directed="1"/>
      <edge id="106995" label="ERCC6 (interacts with) MAN1A2" source="105830" target="105687" cy:directed="1"/>
      <edge id="106994" label="ELL2 (interacts with) CSGALNACT1" source="106852" target="105805" cy:directed="1"/>
      <edge id="106993" label="ELK4 (interacts with) UGGT1" source="105827" target="105705" cy:directed="1"/>
      <edge id="106992" label="ELK4 (interacts with) FAM20B" source="105827" target="105731" cy:directed="1"/>
      <edge id="106991" label="ELK4 (interacts with) ALG10" source="105827" target="105711" cy:directed="1"/>
      <edge id="106990" label="ELK3 (interacts with) FUT11" source="105826" target="105690" cy:directed="1"/>
      <edge id="106989" label="ELF2 (interacts with) SLC35A5" source="105825" target="105702" cy:directed="1"/>
      <edge id="106988" label="ELF1 (interacts with) MAN1A1" source="105822" target="105716" cy:directed="1"/>
      <edge id="106987" label="ELF1 (interacts with) UGCG" source="105822" target="105985" cy:directed="1"/>
      <edge id="106986" label="ELF1 (interacts with) SLC35A3" source="105822" target="105695" cy:directed="1"/>
      <edge id="106985" label="ELF1 (interacts with) COG3" source="105822" target="105823" cy:directed="1"/>
      <edge id="106984" label="EHMT2 (interacts with) B4GALNT4" source="105821" target="105784" cy:directed="1"/>
      <edge id="106983" label="EGLN2 (interacts with) GALT" source="105813" target="106851" cy:directed="1"/>
      <edge id="106982" label="EBF1 (interacts with) MAN1A1" source="105804" target="105716" cy:directed="1"/>
      <edge id="106981" label="DEK (interacts with) B3GNT5" source="105795" target="105707" cy:directed="1"/>
      <edge id="106980" label="DCP1A (interacts with) STT3B" source="106850" target="105688" cy:directed="1"/>
      <edge id="106979" label="CTNNB1 (interacts with) STT3B" source="105794" target="105688" cy:directed="1"/>
      <edge id="106978" label="CREB3 (interacts with) PIGO" source="105786" target="105874" cy:directed="1"/>
      <edge id="106977" label="CPSF3L (interacts with) B3GALT6" source="105780" target="105781" cy:directed="1"/>
      <edge id="106976" label="CLOCK (interacts with) FUT11" source="106849" target="105690" cy:directed="1"/>
      <edge id="106975" label="CIITA (interacts with) FUT7" source="105775" target="105685" cy:directed="1"/>
      <edge id="106974" label="CHD8 (interacts with) UGCG" source="105774" target="105985" cy:directed="1"/>
      <edge id="106973" label="CHD8 (interacts with) ACER2" source="105774" target="105691" cy:directed="1"/>
      <edge id="106972" label="CHD8 (interacts with) STT3B" source="105774" target="105688" cy:directed="1"/>
      <edge id="106971" label="CHD8 (interacts with) NEU3" source="105774" target="105689" cy:directed="1"/>
      <edge id="106970" label="CHD4 (interacts with) GANAB" source="105773" target="105998" cy:directed="1"/>
      <edge id="106969" label="CHD4 (interacts with) NEU3" source="105773" target="105689" cy:directed="1"/>
      <edge id="106968" label="CHD2 (interacts with) MGAT5" source="105770" target="105893" cy:directed="1"/>
      <edge id="106967" label="CHD2 (interacts with) MAN2A2" source="105770" target="105748" cy:directed="1"/>
      <edge id="106966" label="CHD2 (interacts with) MAN1A2" source="105770" target="105687" cy:directed="1"/>
      <edge id="106965" label="CHD1 (interacts with) SLC35A5" source="105769" target="105702" cy:directed="1"/>
      <edge id="106964" label="CHD1 (interacts with) SLC35A3" source="105769" target="105695" cy:directed="1"/>
      <edge id="106963" label="CHD1 (interacts with) SLC35D1" source="105769" target="105950" cy:directed="1"/>
      <edge id="106962" label="CHD1 (interacts with) MAN2A1" source="105769" target="105694" cy:directed="1"/>
      <edge id="106961" label="CDK9 (interacts with) TSTA3" source="105757" target="105880" cy:directed="1"/>
      <edge id="106960" label="CDK9 (interacts with) ST6GALNAC6" source="105757" target="105746" cy:directed="1"/>
      <edge id="106959" label="CDK9 (interacts with) DPM2" source="105757" target="105758" cy:directed="1"/>
      <edge id="106958" label="CDK8 (interacts with) COG5" source="105756" target="105692" cy:directed="1"/>
      <edge id="106957" label="CDK8 (interacts with) STT3B" source="105756" target="105688" cy:directed="1"/>
      <edge id="106956" label="CDK12 (interacts with) ACER2" source="106848" target="105691" cy:directed="1"/>
      <edge id="106955" label="CCDC101 (interacts with) B3GAT3" source="105755" target="105754" cy:directed="1"/>
      <edge id="106954" label="CBX8 (interacts with) B3GAT3" source="105752" target="105754" cy:directed="1"/>
      <edge id="106953" label="CBX8 (interacts with) GALK1" source="105752" target="105753" cy:directed="1"/>
      <edge id="106952" label="CBX8 (interacts with) RFNG" source="105752" target="105744" cy:directed="1"/>
      <edge id="106951" label="CBX6 (interacts with) ST3GAL2" source="106847" target="105806" cy:directed="1"/>
      <edge id="106950" label="CBFA2T3 (interacts with) TPST2" source="106845" target="106840" cy:directed="1"/>
      <edge id="106949" label="CBFA2T3 (interacts with) ST3GAL2" source="106845" target="105806" cy:directed="1"/>
      <edge id="106948" label="CBFA2T3 (interacts with) LFNG" source="106845" target="106846" cy:directed="1"/>
      <edge id="106947" label="CASP8AP2 (interacts with) SLC35A5" source="105738" target="105702" cy:directed="1"/>
      <edge id="106946" label="CASP8AP2 (interacts with) ALG10" source="105738" target="105711" cy:directed="1"/>
      <edge id="106945" label="CASP8AP2 (interacts with) ALG10B" source="105738" target="105727" cy:directed="1"/>
      <edge id="106944" label="C17orf49 (interacts with) B3GAT3" source="105736" target="105754" cy:directed="1"/>
      <edge id="106943" label="BRD4 (interacts with) SLC35E1" source="106843" target="106844" cy:directed="1"/>
      <edge id="106942" label="BCL11A (interacts with) UGT8" source="106841" target="106842" cy:directed="1"/>
      <edge id="106941" label="BATF3 (interacts with) TPST2" source="105723" target="106840" cy:directed="1"/>
      <edge id="106940" label="BATF3 (interacts with) MGAT1" source="105723" target="105724" cy:directed="1"/>
      <edge id="106939" label="BATF (interacts with) RENBP" source="105721" target="105912" cy:directed="1"/>
      <edge id="106938" label="BATF (interacts with) ST6GALNAC4" source="105721" target="106839" cy:directed="1"/>
      <edge id="106937" label="BATF (interacts with) CHST12" source="105721" target="105763" cy:directed="1"/>
      <edge id="106936" label="BATF (interacts with) NAGK" source="105721" target="105765" cy:directed="1"/>
      <edge id="106935" label="BATF (interacts with) FUT7" source="105721" target="105685" cy:directed="1"/>
      <edge id="106934" label="BACH1 (interacts with) B3GNT2" source="105714" target="106838" cy:directed="1"/>
      <edge id="106933" label="BACH1 (interacts with) ACER2" source="105714" target="105691" cy:directed="1"/>
      <edge id="106932" label="BACH1 (interacts with) FUT11" source="105714" target="105690" cy:directed="1"/>
      <edge id="106931" label="BACH1 (interacts with) MAN1A2" source="105714" target="105687" cy:directed="1"/>
      <edge id="106930" label="BACH1 (interacts with) UGCG" source="105714" target="105985" cy:directed="1"/>
      <edge id="106929" label="BACH1 (interacts with) CSGALNACT2" source="105714" target="105715" cy:directed="1"/>
      <edge id="106928" label="ATRX (interacts with) PIGK" source="105712" target="106835" cy:directed="1"/>
      <edge id="106927" label="ATF7IP (interacts with) ALG10" source="105710" target="105711" cy:directed="1"/>
      <edge id="106926" label="ATF2 (interacts with) SLC35A5" source="105704" target="105702" cy:directed="1"/>
      <edge id="106925" label="ATF2 (interacts with) FKTN" source="105704" target="105713" cy:directed="1"/>
      <edge id="106924" label="ATF2 (interacts with) SLC35A3" source="105704" target="105695" cy:directed="1"/>
      <edge id="106923" label="ATF2 (interacts with) COG5" source="105704" target="105692" cy:directed="1"/>
      <edge id="106922" label="ATF2 (interacts with) UGGT1" source="105704" target="105705" cy:directed="1"/>
      <edge id="106921" label="ATF2 (interacts with) NEU3" source="105704" target="105689" cy:directed="1"/>
      <edge id="106920" label="ATF2 (interacts with) ACER2" source="105704" target="105691" cy:directed="1"/>
      <edge id="106919" label="ATF2 (interacts with) SLC35F5" source="105704" target="105696" cy:directed="1"/>
      <edge id="106918" label="ATF2 (interacts with) FUT11" source="105704" target="105690" cy:directed="1"/>
      <edge id="106917" label="ATF2 (interacts with) MAN2A1" source="105704" target="105694" cy:directed="1"/>
      <edge id="106916" label="ATF2 (interacts with) MAN1A2" source="105704" target="105687" cy:directed="1"/>
      <edge id="106915" label="ATF1 (interacts with) SLC35A3" source="105701" target="105695" cy:directed="1"/>
      <edge id="106914" label="ASCL2 (interacts with) GM2A" source="106837" target="105883" cy:directed="1"/>
      <edge id="106913" label="AHR (interacts with) HAS2" source="106836" target="105709" cy:directed="1"/>
      <edge id="106912" label="AHR (interacts with) UGCG" source="106836" target="105985" cy:directed="1"/>
      <edge id="106911" label="AFF4 (interacts with) PIGK" source="105686" target="106835" cy:directed="1"/>
      <edge id="106910" label="AFF4 (interacts with) HS2ST1" source="105686" target="105906" cy:directed="1"/>
      <edge id="106909" label="AFF4 (interacts with) SLC35F5" source="105686" target="105696" cy:directed="1"/>
      <edge id="106908" label="AFF4 (interacts with) SLC35A5" source="105686" target="105702" cy:directed="1"/>
      <edge id="106907" label="AFF4 (interacts with) SLC35D1" source="105686" target="105950" cy:directed="1"/>
      <edge id="106906" label="AFF4 (interacts with) SLC35A3" source="105686" target="105695" cy:directed="1"/>
      <edge id="106905" label="AFF4 (interacts with) UGGT1" source="105686" target="105705" cy:directed="1"/>
      <edge id="106904" label="AFF4 (interacts with) GALNT10" source="105686" target="105697" cy:directed="1"/>
      <edge id="106903" label="AFF4 (interacts with) UGCG" source="105686" target="105985" cy:directed="1"/>
      <edge id="106902" label="AFF4 (interacts with) COG5" source="105686" target="105692" cy:directed="1"/>
      <edge id="106901" label="AFF4 (interacts with) ACER2" source="105686" target="105691" cy:directed="1"/>
      <edge id="106900" label="AFF4 (interacts with) MAN2A1" source="105686" target="105694" cy:directed="1"/>
      <edge id="106899" label="AFF4 (interacts with) FUT11" source="105686" target="105690" cy:directed="1"/>
      <edge id="106898" label="AFF4 (interacts with) NEU3" source="105686" target="105689" cy:directed="1"/>
      <edge id="106897" label="AFF4 (interacts with) STT3B" source="105686" target="105688" cy:directed="1"/>
      <edge id="106896" label="AFF4 (interacts with) MAN1A2" source="105686" target="105687" cy:directed="1"/>
      <edge id="106895" label="ADNP (interacts with) FUT7" source="105684" target="105685" cy:directed="1"/>
    </graph>
  </att>
  <att>
    <graph id="107263" label="CESC" cy:registered="1">
      <node xlink:href="#106031"/>
      <node xlink:href="#106868"/>
      <node xlink:href="#106028"/>
      <node xlink:href="#106025"/>
      <node xlink:href="#106024"/>
      <node id="107356" label="VDR"/>
      <node xlink:href="#106021"/>
      <node xlink:href="#106020"/>
      <node xlink:href="#106019"/>
      <node xlink:href="#106017"/>
      <node xlink:href="#106890"/>
      <node id="107355" label="TFCP2"/>
      <node id="107354" label="TFAP2C"/>
      <node xlink:href="#106016"/>
      <node xlink:href="#106892"/>
      <node id="107353" label="TERF2"/>
      <node xlink:href="#106012"/>
      <node xlink:href="#106011"/>
      <node id="107352" label="B4GALNT2"/>
      <node xlink:href="#106009"/>
      <node xlink:href="#106889"/>
      <node id="107351" label="TAF3"/>
      <node id="107350" label="LAMP2"/>
      <node xlink:href="#106006"/>
      <node id="107349" label="SVIL"/>
      <node id="107348" label="STAT6"/>
      <node xlink:href="#106003"/>
      <node xlink:href="#106002"/>
      <node xlink:href="#105905"/>
      <node id="107347" label="STAT3"/>
      <node xlink:href="#106001"/>
      <node xlink:href="#105999"/>
      <node xlink:href="#105997"/>
      <node xlink:href="#105994"/>
      <node id="107346" label="SP2"/>
      <node id="107345" label="SOX2"/>
      <node xlink:href="#105990"/>
      <node xlink:href="#105989"/>
      <node id="107344" label="SMARCC1"/>
      <node id="107343" label="SMARCA4"/>
      <node xlink:href="#105987"/>
      <node id="107342" label="SMAD3"/>
      <node xlink:href="#106879"/>
      <node id="107341" label="SMAD1"/>
      <node xlink:href="#106885"/>
      <node id="107340" label="MPI"/>
      <node xlink:href="#105984"/>
      <node xlink:href="#105973"/>
      <node id="107339" label="SETDB1"/>
      <node id="107338" label="RYBP"/>
      <node xlink:href="#105983"/>
      <node xlink:href="#105978"/>
      <node xlink:href="#105975"/>
      <node id="107337" label="RLF"/>
      <node xlink:href="#105974"/>
      <node xlink:href="#105855"/>
      <node xlink:href="#105969"/>
      <node xlink:href="#105968"/>
      <node xlink:href="#105906"/>
      <node xlink:href="#105908"/>
      <node xlink:href="#105967"/>
      <node xlink:href="#105965"/>
      <node xlink:href="#105960"/>
      <node xlink:href="#105959"/>
      <node id="107336" label="PML"/>
      <node xlink:href="#105958"/>
      <node id="107335" label="SLC35A2"/>
      <node id="107334" label="PHF8"/>
      <node xlink:href="#105957"/>
      <node xlink:href="#105956"/>
      <node xlink:href="#105953"/>
      <node xlink:href="#105761"/>
      <node id="107333" label="NRF1"/>
      <node xlink:href="#105949"/>
      <node xlink:href="#105948"/>
      <node xlink:href="#106835"/>
      <node xlink:href="#105947"/>
      <node id="107332" label="PIGY"/>
      <node id="107331" label="B4GALT6"/>
      <node id="107330" label="NFYB"/>
      <node xlink:href="#105954"/>
      <node id="107329" label="NFYA"/>
      <node xlink:href="#105943"/>
      <node id="107328" label="PAPSS2"/>
      <node id="107327" label="POFUT2"/>
      <node id="107326" label="NCOR2"/>
      <node xlink:href="#105896"/>
      <node xlink:href="#105942"/>
      <node xlink:href="#105931"/>
      <node xlink:href="#105928"/>
      <node id="107325" label="MEF2D"/>
      <node xlink:href="#105925"/>
      <node xlink:href="#106032"/>
      <node id="107324" label="MED12"/>
      <node xlink:href="#105924"/>
      <node xlink:href="#105919"/>
      <node xlink:href="#105758"/>
      <node id="107323" label="MBD3"/>
      <node id="107322" label="MBD2"/>
      <node xlink:href="#105800"/>
      <node xlink:href="#105916"/>
      <node xlink:href="#105763"/>
      <node xlink:href="#105912"/>
      <node xlink:href="#105724"/>
      <node xlink:href="#105911"/>
      <node id="107321" label="LIN9"/>
      <node xlink:href="#105720"/>
      <node xlink:href="#106875"/>
      <node id="107320" label="LDB1"/>
      <node id="107319" label="ABO"/>
      <node id="107318" label="KLF5"/>
      <node id="107317" label="KLF4"/>
      <node id="107316" label="KLF11"/>
      <node id="107315" label="KDM6B"/>
      <node id="107314" label="KDM5C"/>
      <node xlink:href="#105976"/>
      <node xlink:href="#105907"/>
      <node xlink:href="#105904"/>
      <node xlink:href="#105903"/>
      <node xlink:href="#105750"/>
      <node id="107313" label="KDM2B"/>
      <node id="107312" label="KAT2B"/>
      <node id="107311" label="JARID2"/>
      <node id="107310" label="NAAA"/>
      <node xlink:href="#105884"/>
      <node xlink:href="#105890"/>
      <node xlink:href="#105888"/>
      <node xlink:href="#105776"/>
      <node xlink:href="#106871"/>
      <node xlink:href="#105887"/>
      <node id="107309" label="GBA"/>
      <node xlink:href="#105789"/>
      <node xlink:href="#105886"/>
      <node xlink:href="#105885"/>
      <node xlink:href="#105882"/>
      <node xlink:href="#105880"/>
      <node xlink:href="#105879"/>
      <node id="107308" label="HOXA6"/>
      <node xlink:href="#105877"/>
      <node xlink:href="#105697"/>
      <node id="107307" label="EXT2"/>
      <node id="107306" label="GALNT2"/>
      <node xlink:href="#106867"/>
      <node xlink:href="#105875"/>
      <node id="107305" label="GNPDA1"/>
      <node id="107304" label="HDAC3"/>
      <node xlink:href="#105742"/>
      <node id="107303" label="HDAC1"/>
      <node xlink:href="#105873"/>
      <node id="107302" label="GTF3C2"/>
      <node id="107301" label="GRHL2"/>
      <node xlink:href="#105707"/>
      <node xlink:href="#106866"/>
      <node xlink:href="#105867"/>
      <node xlink:href="#105866"/>
      <node xlink:href="#105810"/>
      <node xlink:href="#105862"/>
      <node xlink:href="#106864"/>
      <node xlink:href="#106863"/>
      <node xlink:href="#105861"/>
      <node xlink:href="#105777"/>
      <node xlink:href="#105766"/>
      <node xlink:href="#105859"/>
      <node xlink:href="#105858"/>
      <node xlink:href="#106838"/>
      <node id="107300" label="ALG11"/>
      <node xlink:href="#105856"/>
      <node id="107299" label="EXTL3"/>
      <node xlink:href="#105923"/>
      <node id="107298" label="FOXK1"/>
      <node id="107297" label="GNE"/>
      <node id="107296" label="GCNT2"/>
      <node xlink:href="#105920"/>
      <node xlink:href="#106859"/>
      <node xlink:href="#105703"/>
      <node xlink:href="#105850"/>
      <node xlink:href="#105893"/>
      <node id="107295" label="FOSL2"/>
      <node xlink:href="#105941"/>
      <node id="107294" label="FOSL1"/>
      <node xlink:href="#105806"/>
      <node xlink:href="#105848"/>
      <node id="107293" label="HK1"/>
      <node xlink:href="#105830"/>
      <node id="107292" label="ERCC3"/>
      <node xlink:href="#105713"/>
      <node xlink:href="#105829"/>
      <node xlink:href="#105826"/>
      <node id="107291" label="PAPSS1"/>
      <node xlink:href="#105822"/>
      <node id="107290" label="ASAH1"/>
      <node id="107289" label="FUT3"/>
      <node id="107288" label="FUT6"/>
      <node id="107287" label="FUT2"/>
      <node xlink:href="#105819"/>
      <node xlink:href="#106893"/>
      <node xlink:href="#105878"/>
      <node id="107286" label="ALG8"/>
      <node id="107285" label="EED"/>
      <node xlink:href="#105803"/>
      <node xlink:href="#105696"/>
      <node id="107284" label="E2F3"/>
      <node xlink:href="#105735"/>
      <node xlink:href="#105796"/>
      <node id="107283" label="GAL3ST2"/>
      <node id="107282" label="DNMT3A"/>
      <node id="107281" label="SLC35B3"/>
      <node xlink:href="#105795"/>
      <node xlink:href="#105790"/>
      <node xlink:href="#105785"/>
      <node xlink:href="#105781"/>
      <node xlink:href="#105780"/>
      <node xlink:href="#106849"/>
      <node xlink:href="#105774"/>
      <node xlink:href="#105770"/>
      <node xlink:href="#105694"/>
      <node xlink:href="#105769"/>
      <node id="107280" label="HS3ST6"/>
      <node xlink:href="#105765"/>
      <node xlink:href="#105764"/>
      <node xlink:href="#105823"/>
      <node xlink:href="#105756"/>
      <node xlink:href="#106891"/>
      <node xlink:href="#106848"/>
      <node xlink:href="#105778"/>
      <node xlink:href="#105771"/>
      <node xlink:href="#105731"/>
      <node xlink:href="#106853"/>
      <node xlink:href="#105745"/>
      <node xlink:href="#105739"/>
      <node xlink:href="#105702"/>
      <node xlink:href="#105738"/>
      <node xlink:href="#105950"/>
      <node xlink:href="#105792"/>
      <node xlink:href="#106844"/>
      <node xlink:href="#106843"/>
      <node id="107279" label="B4GALT5"/>
      <node id="107278" label="FUT10"/>
      <node id="107277" label="BRD3"/>
      <node id="107276" label="BRD2"/>
      <node xlink:href="#105772"/>
      <node xlink:href="#105748"/>
      <node xlink:href="#105734"/>
      <node xlink:href="#105733"/>
      <node xlink:href="#105727"/>
      <node xlink:href="#105695"/>
      <node xlink:href="#105874"/>
      <node xlink:href="#105705"/>
      <node xlink:href="#105711"/>
      <node xlink:href="#105729"/>
      <node xlink:href="#105728"/>
      <node xlink:href="#105730"/>
      <node xlink:href="#105692"/>
      <node id="107275" label="BCL6"/>
      <node xlink:href="#106860"/>
      <node xlink:href="#105834"/>
      <node xlink:href="#106857"/>
      <node xlink:href="#106856"/>
      <node xlink:href="#105721"/>
      <node xlink:href="#105689"/>
      <node xlink:href="#105691"/>
      <node xlink:href="#105690"/>
      <node xlink:href="#105687"/>
      <node xlink:href="#105714"/>
      <node id="107274" label="B4GALT1"/>
      <node xlink:href="#105717"/>
      <node xlink:href="#105715"/>
      <node xlink:href="#105998"/>
      <node xlink:href="#105732"/>
      <node xlink:href="#105688"/>
      <node xlink:href="#105701"/>
      <node xlink:href="#105791"/>
      <node id="107273" label="ASH2L"/>
      <node xlink:href="#105824"/>
      <node xlink:href="#105700"/>
      <node xlink:href="#105699"/>
      <node xlink:href="#105985"/>
      <node xlink:href="#106836"/>
      <node xlink:href="#105685"/>
      <node xlink:href="#105684"/>
      <edge id="107959" label="ZBTB33 (interacts with) PIGN" source="106031" target="105730" cy:directed="1"/>
      <edge id="107958" label="ZBTB33 (interacts with) OGT" source="106031" target="105771" cy:directed="1"/>
      <edge id="107957" label="ZBTB33 (interacts with) SLC35A3" source="106031" target="105695" cy:directed="1"/>
      <edge id="107956" label="ZBTB33 (interacts with) C1GALT1C1" source="106031" target="106032" cy:directed="1"/>
      <edge id="107955" label="ZBTB33 (interacts with) ALG10" source="106031" target="105711" cy:directed="1"/>
      <edge id="107954" label="YY1 (interacts with) COG6" source="106028" target="105824" cy:directed="1"/>
      <edge id="107953" label="YY1 (interacts with) SLC35E3" source="106028" target="105732" cy:directed="1"/>
      <edge id="107952" label="YY1 (interacts with) MAN1A2" source="106028" target="105687" cy:directed="1"/>
      <edge id="107951" label="YY1 (interacts with) SLC35F5" source="106028" target="105696" cy:directed="1"/>
      <edge id="107950" label="YY1 (interacts with) GNPNAT1" source="106028" target="105855" cy:directed="1"/>
      <edge id="107949" label="YY1 (interacts with) MGAT2" source="106028" target="106868" cy:directed="1"/>
      <edge id="107948" label="XRN2 (interacts with) ACER2" source="106025" target="105691" cy:directed="1"/>
      <edge id="107947" label="XRN2 (interacts with) FUT10" source="106025" target="107278" cy:directed="1"/>
      <edge id="107946" label="XRN2 (interacts with) SLC35A3" source="106025" target="105695" cy:directed="1"/>
      <edge id="107945" label="XRN2 (interacts with) PIGO" source="106025" target="105874" cy:directed="1"/>
      <edge id="107944" label="XRN2 (interacts with) HS2ST1" source="106025" target="105906" cy:directed="1"/>
      <edge id="107943" label="XRN2 (interacts with) SLC35E1" source="106025" target="106844" cy:directed="1"/>
      <edge id="107942" label="XRN2 (interacts with) POFUT1" source="106025" target="105792" cy:directed="1"/>
      <edge id="107941" label="XRN2 (interacts with) NEU3" source="106025" target="105689" cy:directed="1"/>
      <edge id="107940" label="XRN2 (interacts with) MAN1A2" source="106025" target="105687" cy:directed="1"/>
      <edge id="107939" label="XRN2 (interacts with) MAN2A1" source="106025" target="105694" cy:directed="1"/>
      <edge id="107938" label="XRN2 (interacts with) STT3B" source="106025" target="105688" cy:directed="1"/>
      <edge id="107937" label="WDR5 (interacts with) POMT1" source="106024" target="105761" cy:directed="1"/>
      <edge id="107936" label="VDR (interacts with) ACER2" source="107356" target="105691" cy:directed="1"/>
      <edge id="107935" label="VDR (interacts with) NDST1" source="107356" target="105923" cy:directed="1"/>
      <edge id="107934" label="USF1 (interacts with) RENBP" source="106021" target="105912" cy:directed="1"/>
      <edge id="107933" label="USF1 (interacts with) FUT7" source="106021" target="105685" cy:directed="1"/>
      <edge id="107932" label="UBTF (interacts with) COG7" source="106020" target="105791" cy:directed="1"/>
      <edge id="107931" label="TTF2 (interacts with) ACER2" source="106019" target="105691" cy:directed="1"/>
      <edge id="107930" label="TTF2 (interacts with) NDST2" source="106019" target="105772" cy:directed="1"/>
      <edge id="107929" label="TTF2 (interacts with) HS2ST1" source="106019" target="105906" cy:directed="1"/>
      <edge id="107928" label="TTF2 (interacts with) MAN2A1" source="106019" target="105694" cy:directed="1"/>
      <edge id="107927" label="TTF2 (interacts with) FPGT" source="106019" target="105976" cy:directed="1"/>
      <edge id="107926" label="TTF2 (interacts with) PIGN" source="106019" target="105730" cy:directed="1"/>
      <edge id="107925" label="TTF2 (interacts with) NEU3" source="106019" target="105689" cy:directed="1"/>
      <edge id="107924" label="TTF2 (interacts with) MAN1A2" source="106019" target="105687" cy:directed="1"/>
      <edge id="107923" label="TP63 (interacts with) B3GNT5" source="106017" target="105707" cy:directed="1"/>
      <edge id="107922" label="TP63 (interacts with) HAS3" source="106017" target="105941" cy:directed="1"/>
      <edge id="107921" label="THAP11 (interacts with) KHK" source="106890" target="105800" cy:directed="1"/>
      <edge id="107920" label="THAP11 (interacts with) COG4" source="106890" target="106892" cy:directed="1"/>
      <edge id="107919" label="TFCP2 (interacts with) GANAB" source="107355" target="105998" cy:directed="1"/>
      <edge id="107918" label="TFAP2C (interacts with) HS3ST6" source="107354" target="107280" cy:directed="1"/>
      <edge id="107917" label="TET2 (interacts with) ASAH1" source="106016" target="107290" cy:directed="1"/>
      <edge id="107916" label="TET2 (interacts with) COG6" source="106016" target="105824" cy:directed="1"/>
      <edge id="107915" label="TET2 (interacts with) PIGN" source="106016" target="105730" cy:directed="1"/>
      <edge id="107914" label="TET2 (interacts with) SLC35A3" source="106016" target="105695" cy:directed="1"/>
      <edge id="107913" label="TET2 (interacts with) NDST2" source="106016" target="105772" cy:directed="1"/>
      <edge id="107912" label="TET2 (interacts with) ACER2" source="106016" target="105691" cy:directed="1"/>
      <edge id="107911" label="TET2 (interacts with) COG5" source="106016" target="105692" cy:directed="1"/>
      <edge id="107910" label="TET2 (interacts with) MAN1A2" source="106016" target="105687" cy:directed="1"/>
      <edge id="107909" label="TERF2 (interacts with) COG4" source="107353" target="106892" cy:directed="1"/>
      <edge id="107908" label="TERF2 (interacts with) COG8" source="107353" target="106891" cy:directed="1"/>
      <edge id="107907" label="TDRD3 (interacts with) ALG5" source="106011" target="106012" cy:directed="1"/>
      <edge id="107906" label="TCF7L1 (interacts with) B4GALNT2" source="106009" target="107352" cy:directed="1"/>
      <edge id="107905" label="TBX21 (interacts with) FUT7" source="106889" target="105685" cy:directed="1"/>
      <edge id="107904" label="TAF3 (interacts with) FUT11" source="107351" target="105690" cy:directed="1"/>
      <edge id="107903" label="TAF1 (interacts with) LAMP2" source="106006" target="107350" cy:directed="1"/>
      <edge id="107902" label="TAF1 (interacts with) FUT10" source="106006" target="107278" cy:directed="1"/>
      <edge id="107901" label="TAF1 (interacts with) SLC35A3" source="106006" target="105695" cy:directed="1"/>
      <edge id="107900" label="TAF1 (interacts with) NDST2" source="106006" target="105772" cy:directed="1"/>
      <edge id="107899" label="TAF1 (interacts with) ACER2" source="106006" target="105691" cy:directed="1"/>
      <edge id="107898" label="TAF1 (interacts with) RTF1" source="106006" target="105700" cy:directed="1"/>
      <edge id="107897" label="TAF1 (interacts with) COG5" source="106006" target="105692" cy:directed="1"/>
      <edge id="107896" label="TAF1 (interacts with) OGT" source="106006" target="105771" cy:directed="1"/>
      <edge id="107895" label="TAF1 (interacts with) MAN1A2" source="106006" target="105687" cy:directed="1"/>
      <edge id="107894" label="TAF1 (interacts with) NEU3" source="106006" target="105689" cy:directed="1"/>
      <edge id="107893" label="SVIL (interacts with) RTF1" source="107349" target="105700" cy:directed="1"/>
      <edge id="107892" label="STAT6 (interacts with) FUT2" source="107348" target="107287" cy:directed="1"/>
      <edge id="107891" label="STAT5A (interacts with) RENBP" source="106003" target="105912" cy:directed="1"/>
      <edge id="107890" label="STAT4 (interacts with) ST3GAL5" source="106002" target="106857" cy:directed="1"/>
      <edge id="107889" label="STAT4 (interacts with) RENBP" source="106002" target="105912" cy:directed="1"/>
      <edge id="107888" label="STAT4 (interacts with) MFNG" source="106002" target="105766" cy:directed="1"/>
      <edge id="107887" label="STAT4 (interacts with) ST8SIA4" source="106002" target="105834" cy:directed="1"/>
      <edge id="107886" label="STAT4 (interacts with) FUT7" source="106002" target="105685" cy:directed="1"/>
      <edge id="107885" label="STAT3 (interacts with) B3GNT2" source="107347" target="106838" cy:directed="1"/>
      <edge id="107884" label="STAT3 (interacts with) SLC35A5" source="107347" target="105702" cy:directed="1"/>
      <edge id="107883" label="STAT3 (interacts with) PIGN" source="107347" target="105730" cy:directed="1"/>
      <edge id="107882" label="STAT3 (interacts with) ASAH1" source="107347" target="107290" cy:directed="1"/>
      <edge id="107881" label="STAT3 (interacts with) ACER2" source="107347" target="105691" cy:directed="1"/>
      <edge id="107880" label="STAT3 (interacts with) GNS" source="107347" target="105905" cy:directed="1"/>
      <edge id="107879" label="STAT3 (interacts with) MAN1A2" source="107347" target="105687" cy:directed="1"/>
      <edge id="107878" label="STAT3 (interacts with) STT3B" source="107347" target="105688" cy:directed="1"/>
      <edge id="107877" label="STAT3 (interacts with) FUT11" source="107347" target="105690" cy:directed="1"/>
      <edge id="107876" label="STAT3 (interacts with) MAN2A1" source="107347" target="105694" cy:directed="1"/>
      <edge id="107875" label="STAT3 (interacts with) NEU3" source="107347" target="105689" cy:directed="1"/>
      <edge id="107874" label="STAT3 (interacts with) UGCG" source="107347" target="105985" cy:directed="1"/>
      <edge id="107873" label="STAT3 (interacts with) MGAT5" source="107347" target="105893" cy:directed="1"/>
      <edge id="107872" label="STAT2 (interacts with) LAMP3" source="106001" target="105776" cy:directed="1"/>
      <edge id="107871" label="STAT1 (interacts with) ST3GAL5" source="105999" target="106857" cy:directed="1"/>
      <edge id="107870" label="STAT1 (interacts with) HK3" source="105999" target="105859" cy:directed="1"/>
      <edge id="107869" label="SSRP1 (interacts with) GANAB" source="105997" target="105998" cy:directed="1"/>
      <edge id="107868" label="SRCAP (interacts with) FUT11" source="105994" target="105690" cy:directed="1"/>
      <edge id="107867" label="SP2 (interacts with) MAN2A2" source="107346" target="105748" cy:directed="1"/>
      <edge id="107866" label="SP2 (interacts with) SLC35A5" source="107346" target="105702" cy:directed="1"/>
      <edge id="107865" label="SP2 (interacts with) PIGN" source="107346" target="105730" cy:directed="1"/>
      <edge id="107864" label="SP2 (interacts with) STT3B" source="107346" target="105688" cy:directed="1"/>
      <edge id="107863" label="SP2 (interacts with) MAN1A2" source="107346" target="105687" cy:directed="1"/>
      <edge id="107862" label="SP2 (interacts with) PIGO" source="107346" target="105874" cy:directed="1"/>
      <edge id="107861" label="SOX2 (interacts with) FUT2" source="107345" target="107287" cy:directed="1"/>
      <edge id="107860" label="SMC3 (interacts with) ACER2" source="105990" target="105691" cy:directed="1"/>
      <edge id="107859" label="SMC3 (interacts with) SLC35E3" source="105990" target="105732" cy:directed="1"/>
      <edge id="107858" label="SMC3 (interacts with) COG6" source="105990" target="105824" cy:directed="1"/>
      <edge id="107857" label="SMC3 (interacts with) MAN1A2" source="105990" target="105687" cy:directed="1"/>
      <edge id="107856" label="SMC3 (interacts with) COG5" source="105990" target="105692" cy:directed="1"/>
      <edge id="107855" label="SMC3 (interacts with) FAM20B" source="105990" target="105731" cy:directed="1"/>
      <edge id="107854" label="SMC3 (interacts with) PIGN" source="105990" target="105730" cy:directed="1"/>
      <edge id="107853" label="SMC3 (interacts with) NEU3" source="105990" target="105689" cy:directed="1"/>
      <edge id="107852" label="SMC3 (interacts with) SLC35A3" source="105990" target="105695" cy:directed="1"/>
      <edge id="107851" label="SMC3 (interacts with) RTF1" source="105990" target="105700" cy:directed="1"/>
      <edge id="107850" label="SMC3 (interacts with) FUT11" source="105990" target="105690" cy:directed="1"/>
      <edge id="107849" label="SMC3 (interacts with) STT3B" source="105990" target="105688" cy:directed="1"/>
      <edge id="107848" label="SMC1A (interacts with) COG7" source="105989" target="105791" cy:directed="1"/>
      <edge id="107847" label="SMC1A (interacts with) SLC35A5" source="105989" target="105702" cy:directed="1"/>
      <edge id="107846" label="SMC1A (interacts with) GALNT7" source="105989" target="106859" cy:directed="1"/>
      <edge id="107845" label="SMC1A (interacts with) FKTN" source="105989" target="105713" cy:directed="1"/>
      <edge id="107844" label="SMC1A (interacts with) PIGN" source="105989" target="105730" cy:directed="1"/>
      <edge id="107843" label="SMC1A (interacts with) SLC35D1" source="105989" target="105950" cy:directed="1"/>
      <edge id="107842" label="SMC1A (interacts with) SLC35A3" source="105989" target="105695" cy:directed="1"/>
      <edge id="107841" label="SMC1A (interacts with) FUT11" source="105989" target="105690" cy:directed="1"/>
      <edge id="107840" label="SMC1A (interacts with) MAN2A1" source="105989" target="105694" cy:directed="1"/>
      <edge id="107839" label="SMC1A (interacts with) MAN1A2" source="105989" target="105687" cy:directed="1"/>
      <edge id="107838" label="SMC1A (interacts with) STT3B" source="105989" target="105688" cy:directed="1"/>
      <edge id="107837" label="SMC1A (interacts with) NEU3" source="105989" target="105689" cy:directed="1"/>
      <edge id="107836" label="SMARCC1 (interacts with) B4GALT5" source="107344" target="107279" cy:directed="1"/>
      <edge id="107835" label="SMARCC1 (interacts with) SLC35A3" source="107344" target="105695" cy:directed="1"/>
      <edge id="107834" label="SMARCA4 (interacts with) SLC35E1" source="107343" target="106844" cy:directed="1"/>
      <edge id="107833" label="SMAD4 (interacts with) B4GALT6" source="105987" target="107331" cy:directed="1"/>
      <edge id="107832" label="SMAD4 (interacts with) RTF1" source="105987" target="105700" cy:directed="1"/>
      <edge id="107831" label="SMAD3 (interacts with) HK1" source="107342" target="107293" cy:directed="1"/>
      <edge id="107830" label="SMAD1 (interacts with) ALG6" source="107341" target="106879" cy:directed="1"/>
      <edge id="107829" label="SMAD1 (interacts with) RTF1" source="107341" target="105700" cy:directed="1"/>
      <edge id="107828" label="SMAD1 (interacts with) PIGN" source="107341" target="105730" cy:directed="1"/>
      <edge id="107827" label="SMAD1 (interacts with) MAN1A2" source="107341" target="105687" cy:directed="1"/>
      <edge id="107826" label="SMAD1 (interacts with) PAPSS1" source="107341" target="107291" cy:directed="1"/>
      <edge id="107825" label="SIRT6 (interacts with) DPM2" source="106885" target="105758" cy:directed="1"/>
      <edge id="107824" label="SIN3A (interacts with) MPI" source="105984" target="107340" cy:directed="1"/>
      <edge id="107823" label="SIN3A (interacts with) FKTN" source="105984" target="105713" cy:directed="1"/>
      <edge id="107822" label="SIN3A (interacts with) PIGO" source="105984" target="105874" cy:directed="1"/>
      <edge id="107821" label="SIN3A (interacts with) CHSY1" source="105984" target="105717" cy:directed="1"/>
      <edge id="107820" label="SIN3A (interacts with) MAN2A2" source="105984" target="105748" cy:directed="1"/>
      <edge id="107819" label="SIN3A (interacts with) ACER2" source="105984" target="105691" cy:directed="1"/>
      <edge id="107818" label="SIN3A (interacts with) SLC35E3" source="105984" target="105732" cy:directed="1"/>
      <edge id="107817" label="SIN3A (interacts with) PIGN" source="105984" target="105730" cy:directed="1"/>
      <edge id="107816" label="SIN3A (interacts with) RTF1" source="105984" target="105700" cy:directed="1"/>
      <edge id="107815" label="SETDB1 (interacts with) COG2" source="107339" target="105973" cy:directed="1"/>
      <edge id="107814" label="SETDB1 (interacts with) PIGM" source="107339" target="105954" cy:directed="1"/>
      <edge id="107813" label="RYBP (interacts with) STT3B" source="107338" target="105688" cy:directed="1"/>
      <edge id="107812" label="RXRA (interacts with) NDST1" source="105983" target="105923" cy:directed="1"/>
      <edge id="107811" label="RUNX1 (interacts with) ST6GAL2" source="105978" target="105720" cy:directed="1"/>
      <edge id="107810" label="RNF2 (interacts with) B3GALNT2" source="105975" target="105908" cy:directed="1"/>
      <edge id="107809" label="RNF2 (interacts with) COG6" source="105975" target="105824" cy:directed="1"/>
      <edge id="107808" label="RNF2 (interacts with) SLC35A3" source="105975" target="105695" cy:directed="1"/>
      <edge id="107807" label="RNF2 (interacts with) FPGT" source="105975" target="105976" cy:directed="1"/>
      <edge id="107806" label="RNF2 (interacts with) MAN1A2" source="105975" target="105687" cy:directed="1"/>
      <edge id="107805" label="RNF2 (interacts with) FAM20B" source="105975" target="105731" cy:directed="1"/>
      <edge id="107804" label="RLF (interacts with) RTF1" source="107337" target="105700" cy:directed="1"/>
      <edge id="107803" label="RFX7 (interacts with) NEU3" source="105974" target="105689" cy:directed="1"/>
      <edge id="107802" label="RCOR1 (interacts with) COG6" source="105969" target="105824" cy:directed="1"/>
      <edge id="107801" label="RCOR1 (interacts with) PIGN" source="105969" target="105730" cy:directed="1"/>
      <edge id="107800" label="RCOR1 (interacts with) FUT11" source="105969" target="105690" cy:directed="1"/>
      <edge id="107799" label="RCOR1 (interacts with) ACER2" source="105969" target="105691" cy:directed="1"/>
      <edge id="107798" label="RCOR1 (interacts with) GNPNAT1" source="105969" target="105855" cy:directed="1"/>
      <edge id="107797" label="RCOR1 (interacts with) MAN1A2" source="105969" target="105687" cy:directed="1"/>
      <edge id="107796" label="RCOR1 (interacts with) MAN2A1" source="105969" target="105694" cy:directed="1"/>
      <edge id="107795" label="RBL2 (interacts with) ASAH1" source="105968" target="107290" cy:directed="1"/>
      <edge id="107794" label="RBL2 (interacts with) PIGM" source="105968" target="105954" cy:directed="1"/>
      <edge id="107793" label="RBL2 (interacts with) ACER2" source="105968" target="105691" cy:directed="1"/>
      <edge id="107792" label="RBL2 (interacts with) MAN1A2" source="105968" target="105687" cy:directed="1"/>
      <edge id="107791" label="RBL2 (interacts with) COG6" source="105968" target="105824" cy:directed="1"/>
      <edge id="107790" label="RBL2 (interacts with) PIGN" source="105968" target="105730" cy:directed="1"/>
      <edge id="107789" label="RBL2 (interacts with) FPGT" source="105968" target="105976" cy:directed="1"/>
      <edge id="107788" label="RBL2 (interacts with) MAN2A1" source="105968" target="105694" cy:directed="1"/>
      <edge id="107787" label="RBL2 (interacts with) STT3B" source="105968" target="105688" cy:directed="1"/>
      <edge id="107786" label="RBL2 (interacts with) SLC35A3" source="105968" target="105695" cy:directed="1"/>
      <edge id="107785" label="RBL2 (interacts with) SLC35A5" source="105968" target="105702" cy:directed="1"/>
      <edge id="107784" label="RBL2 (interacts with) ALG10B" source="105968" target="105727" cy:directed="1"/>
      <edge id="107783" label="RBBP5 (interacts with) PIGM" source="105967" target="105954" cy:directed="1"/>
      <edge id="107782" label="RBBP5 (interacts with) PIGO" source="105967" target="105874" cy:directed="1"/>
      <edge id="107781" label="RBBP5 (interacts with) HS2ST1" source="105967" target="105906" cy:directed="1"/>
      <edge id="107780" label="RBBP5 (interacts with) B3GALNT2" source="105967" target="105908" cy:directed="1"/>
      <edge id="107779" label="RBBP5 (interacts with) PIGN" source="105967" target="105730" cy:directed="1"/>
      <edge id="107778" label="RBBP5 (interacts with) SLC35E1" source="105967" target="106844" cy:directed="1"/>
      <edge id="107777" label="RBBP5 (interacts with) SLC35A3" source="105967" target="105695" cy:directed="1"/>
      <edge id="107776" label="RBBP5 (interacts with) ACER2" source="105967" target="105691" cy:directed="1"/>
      <edge id="107775" label="RBBP5 (interacts with) FUT11" source="105967" target="105690" cy:directed="1"/>
      <edge id="107774" label="RBBP5 (interacts with) COG5" source="105967" target="105692" cy:directed="1"/>
      <edge id="107773" label="RBBP5 (interacts with) FAM20B" source="105967" target="105731" cy:directed="1"/>
      <edge id="107772" label="RBBP5 (interacts with) MAN1A2" source="105967" target="105687" cy:directed="1"/>
      <edge id="107771" label="RB1 (interacts with) B3GNT5" source="105965" target="105707" cy:directed="1"/>
      <edge id="107770" label="RB1 (interacts with) COG3" source="105965" target="105823" cy:directed="1"/>
      <edge id="107769" label="RB1 (interacts with) COG6" source="105965" target="105824" cy:directed="1"/>
      <edge id="107768" label="POLR3A (interacts with) UGCG" source="105960" target="105985" cy:directed="1"/>
      <edge id="107767" label="POLR3A (interacts with) MAN2A1" source="105960" target="105694" cy:directed="1"/>
      <edge id="107766" label="POLR3A (interacts with) NEU3" source="105960" target="105689" cy:directed="1"/>
      <edge id="107765" label="POLR3A (interacts with) MGAT5" source="105960" target="105893" cy:directed="1"/>
      <edge id="107764" label="POLR2B (interacts with) PAPSS1" source="105959" target="107291" cy:directed="1"/>
      <edge id="107763" label="POLR2B (interacts with) ACER2" source="105959" target="105691" cy:directed="1"/>
      <edge id="107762" label="POLR2B (interacts with) PIGN" source="105959" target="105730" cy:directed="1"/>
      <edge id="107761" label="POLR2B (interacts with) RTF1" source="105959" target="105700" cy:directed="1"/>
      <edge id="107760" label="POLR2B (interacts with) MAN2A1" source="105959" target="105694" cy:directed="1"/>
      <edge id="107759" label="POLR2B (interacts with) STT3B" source="105959" target="105688" cy:directed="1"/>
      <edge id="107758" label="POLR2B (interacts with) MAN1A2" source="105959" target="105687" cy:directed="1"/>
      <edge id="107757" label="PML (interacts with) LAMP3" source="107336" target="105776" cy:directed="1"/>
      <edge id="107756" label="PIAS1 (interacts with) PIGO" source="105958" target="105874" cy:directed="1"/>
      <edge id="107755" label="PIAS1 (interacts with) CHSY1" source="105958" target="105717" cy:directed="1"/>
      <edge id="107754" label="PIAS1 (interacts with) ALG10" source="105958" target="105711" cy:directed="1"/>
      <edge id="107753" label="PIAS1 (interacts with) FUT11" source="105958" target="105690" cy:directed="1"/>
      <edge id="107752" label="PIAS1 (interacts with) UGCG" source="105958" target="105985" cy:directed="1"/>
      <edge id="107751" label="PIAS1 (interacts with) ACER2" source="105958" target="105691" cy:directed="1"/>
      <edge id="107750" label="PIAS1 (interacts with) MGAT5" source="105958" target="105893" cy:directed="1"/>
      <edge id="107749" label="PHF8 (interacts with) FAM20B" source="107334" target="105731" cy:directed="1"/>
      <edge id="107748" label="PHF8 (interacts with) COG7" source="107334" target="105791" cy:directed="1"/>
      <edge id="107747" label="PHF8 (interacts with) SLC35A3" source="107334" target="105695" cy:directed="1"/>
      <edge id="107746" label="PHF8 (interacts with) SLC35A5" source="107334" target="105702" cy:directed="1"/>
      <edge id="107745" label="PHF8 (interacts with) SLC35A2" source="107334" target="107335" cy:directed="1"/>
      <edge id="107744" label="PHF8 (interacts with) MAN1A2" source="107334" target="105687" cy:directed="1"/>
      <edge id="107743" label="PHF8 (interacts with) PIGN" source="107334" target="105730" cy:directed="1"/>
      <edge id="107742" label="PHF8 (interacts with) NDST2" source="107334" target="105772" cy:directed="1"/>
      <edge id="107741" label="PHF8 (interacts with) OGT" source="107334" target="105771" cy:directed="1"/>
      <edge id="107740" label="PHF8 (interacts with) COG5" source="107334" target="105692" cy:directed="1"/>
      <edge id="107739" label="PHF6 (interacts with) FAM20B" source="105957" target="105731" cy:directed="1"/>
      <edge id="107738" label="PHF20 (interacts with) POFUT1" source="105956" target="105792" cy:directed="1"/>
      <edge id="107737" label="PBX1 (interacts with) COG7" source="105953" target="105791" cy:directed="1"/>
      <edge id="107736" label="PBX1 (interacts with) PIGN" source="105953" target="105730" cy:directed="1"/>
      <edge id="107735" label="PBX1 (interacts with) FAM20B" source="105953" target="105731" cy:directed="1"/>
      <edge id="107734" label="PBX1 (interacts with) MAN1A2" source="105953" target="105687" cy:directed="1"/>
      <edge id="107733" label="NRF1 (interacts with) POMT1" source="107333" target="105761" cy:directed="1"/>
      <edge id="107732" label="NR2C2 (interacts with) PIGO" source="105949" target="105874" cy:directed="1"/>
      <edge id="107731" label="NR2C2 (interacts with) SLC35E1" source="105949" target="106844" cy:directed="1"/>
      <edge id="107730" label="NR2C2 (interacts with) SLC35D1" source="105949" target="105950" cy:directed="1"/>
      <edge id="107729" label="NR2C2 (interacts with) SLC35A3" source="105949" target="105695" cy:directed="1"/>
      <edge id="107728" label="NR2C2 (interacts with) COG5" source="105949" target="105692" cy:directed="1"/>
      <edge id="107727" label="NR2C2 (interacts with) COG3" source="105949" target="105823" cy:directed="1"/>
      <edge id="107726" label="NR2C2 (interacts with) FUT11" source="105949" target="105690" cy:directed="1"/>
      <edge id="107725" label="NR2C2 (interacts with) ALG10B" source="105949" target="105727" cy:directed="1"/>
      <edge id="107724" label="NR2C2 (interacts with) OGT" source="105949" target="105771" cy:directed="1"/>
      <edge id="107723" label="NR2C2 (interacts with) FKTN" source="105949" target="105713" cy:directed="1"/>
      <edge id="107722" label="NR2C2 (interacts with) STT3B" source="105949" target="105688" cy:directed="1"/>
      <edge id="107721" label="NPAT (interacts with) SLC35A3" source="105948" target="105695" cy:directed="1"/>
      <edge id="107720" label="NPAT (interacts with) RTF1" source="105948" target="105700" cy:directed="1"/>
      <edge id="107719" label="NPAT (interacts with) DPAGT1" source="105948" target="105878" cy:directed="1"/>
      <edge id="107718" label="NIPBL (interacts with) GALNT7" source="105947" target="106859" cy:directed="1"/>
      <edge id="107717" label="NIPBL (interacts with) COG3" source="105947" target="105823" cy:directed="1"/>
      <edge id="107716" label="NIPBL (interacts with) B3GNT2" source="105947" target="106838" cy:directed="1"/>
      <edge id="107715" label="NIPBL (interacts with) PIGK" source="105947" target="106835" cy:directed="1"/>
      <edge id="107714" label="NIPBL (interacts with) GALNT4" source="105947" target="105703" cy:directed="1"/>
      <edge id="107713" label="NIPBL (interacts with) PIGN" source="105947" target="105730" cy:directed="1"/>
      <edge id="107712" label="NIPBL (interacts with) SLC35A3" source="105947" target="105695" cy:directed="1"/>
      <edge id="107711" label="NIPBL (interacts with) ACER2" source="105947" target="105691" cy:directed="1"/>
      <edge id="107710" label="NIPBL (interacts with) UGCG" source="105947" target="105985" cy:directed="1"/>
      <edge id="107709" label="NIPBL (interacts with) COG5" source="105947" target="105692" cy:directed="1"/>
      <edge id="107708" label="NIPBL (interacts with) MGAT5" source="105947" target="105893" cy:directed="1"/>
      <edge id="107707" label="NIPBL (interacts with) NEU3" source="105947" target="105689" cy:directed="1"/>
      <edge id="107706" label="NFYB (interacts with) PIGY" source="107330" target="107332" cy:directed="1"/>
      <edge id="107705" label="NFYB (interacts with) B4GALT6" source="107330" target="107331" cy:directed="1"/>
      <edge id="107704" label="NFYA (interacts with) GANAB" source="107329" target="105998" cy:directed="1"/>
      <edge id="107703" label="NFYA (interacts with) FAM20B" source="107329" target="105731" cy:directed="1"/>
      <edge id="107702" label="NFYA (interacts with) PIGM" source="107329" target="105954" cy:directed="1"/>
      <edge id="107701" label="NFYA (interacts with) NEU3" source="107329" target="105689" cy:directed="1"/>
      <edge id="107700" label="NFYA (interacts with) STT3B" source="107329" target="105688" cy:directed="1"/>
      <edge id="107699" label="NFAT5 (interacts with) ACER2" source="105943" target="105691" cy:directed="1"/>
      <edge id="107698" label="NCOR2 (interacts with) PIGO" source="107326" target="105874" cy:directed="1"/>
      <edge id="107697" label="NCOR2 (interacts with) MAN2A1" source="107326" target="105694" cy:directed="1"/>
      <edge id="107696" label="NCOR2 (interacts with) PAPSS2" source="107326" target="107328" cy:directed="1"/>
      <edge id="107695" label="NCOR2 (interacts with) GALNT2" source="107326" target="107306" cy:directed="1"/>
      <edge id="107694" label="NCOR2 (interacts with) NEU3" source="107326" target="105689" cy:directed="1"/>
      <edge id="107693" label="NCOR2 (interacts with) POFUT2" source="107326" target="107327" cy:directed="1"/>
      <edge id="107692" label="NCOR2 (interacts with) MGAT5" source="107326" target="105893" cy:directed="1"/>
      <edge id="107691" label="MZF1 (interacts with) FKRP" source="105942" target="105896" cy:directed="1"/>
      <edge id="107690" label="MRE11A (interacts with) DPAGT1" source="105931" target="105878" cy:directed="1"/>
      <edge id="107689" label="MRE11A (interacts with) NEU3" source="105931" target="105689" cy:directed="1"/>
      <edge id="107688" label="MEIS1 (interacts with) PIGN" source="105928" target="105730" cy:directed="1"/>
      <edge id="107687" label="MEF2D (interacts with) MAN2A2" source="107325" target="105748" cy:directed="1"/>
      <edge id="107686" label="MEF2D (interacts with) B4GALT3" source="107325" target="105789" cy:directed="1"/>
      <edge id="107685" label="MEF2A (interacts with) PIGN" source="105925" target="105730" cy:directed="1"/>
      <edge id="107684" label="MEF2A (interacts with) ACER2" source="105925" target="105691" cy:directed="1"/>
      <edge id="107683" label="MEF2A (interacts with) COG3" source="105925" target="105823" cy:directed="1"/>
      <edge id="107682" label="MEF2A (interacts with) RTF1" source="105925" target="105700" cy:directed="1"/>
      <edge id="107681" label="MEF2A (interacts with) CHSY1" source="105925" target="105717" cy:directed="1"/>
      <edge id="107680" label="MED12 (interacts with) SLC35A5" source="107324" target="105702" cy:directed="1"/>
      <edge id="107679" label="MED12 (interacts with) C1GALT1C1" source="107324" target="106032" cy:directed="1"/>
      <edge id="107678" label="MED12 (interacts with) ABO" source="107324" target="107319" cy:directed="1"/>
      <edge id="107677" label="MED12 (interacts with) COG5" source="107324" target="105692" cy:directed="1"/>
      <edge id="107676" label="MED12 (interacts with) SLC35A3" source="107324" target="105695" cy:directed="1"/>
      <edge id="107675" label="MED12 (interacts with) COG7" source="107324" target="105791" cy:directed="1"/>
      <edge id="107674" label="MED12 (interacts with) FAM20B" source="107324" target="105731" cy:directed="1"/>
      <edge id="107673" label="MED12 (interacts with) NDST2" source="107324" target="105772" cy:directed="1"/>
      <edge id="107672" label="MED12 (interacts with) MAN2A2" source="107324" target="105748" cy:directed="1"/>
      <edge id="107671" label="MED12 (interacts with) NEU3" source="107324" target="105689" cy:directed="1"/>
      <edge id="107670" label="MED1 (interacts with) PIGO" source="105924" target="105874" cy:directed="1"/>
      <edge id="107669" label="MED1 (interacts with) GANAB" source="105924" target="105998" cy:directed="1"/>
      <edge id="107668" label="MED1 (interacts with) FUT11" source="105924" target="105690" cy:directed="1"/>
      <edge id="107667" label="MECOM (interacts with) GALNT7" source="105919" target="106859" cy:directed="1"/>
      <edge id="107666" label="MECOM (interacts with) ST6GALNAC1" source="105919" target="105920" cy:directed="1"/>
      <edge id="107665" label="MBD3 (interacts with) PMM1" source="107323" target="105735" cy:directed="1"/>
      <edge id="107664" label="MBD3 (interacts with) DPM2" source="107323" target="105758" cy:directed="1"/>
      <edge id="107663" label="MBD2 (interacts with) PIGN" source="107322" target="105730" cy:directed="1"/>
      <edge id="107662" label="MAZ (interacts with) KHK" source="105916" target="105800" cy:directed="1"/>
      <edge id="107661" label="MAZ (interacts with) B3GALT6" source="105916" target="105781" cy:directed="1"/>
      <edge id="107660" label="LYL1 (interacts with) CHST12" source="105911" target="105763" cy:directed="1"/>
      <edge id="107659" label="LYL1 (interacts with) HK3" source="105911" target="105859" cy:directed="1"/>
      <edge id="107658" label="LYL1 (interacts with) RENBP" source="105911" target="105912" cy:directed="1"/>
      <edge id="107657" label="LYL1 (interacts with) MGAT1" source="105911" target="105724" cy:directed="1"/>
      <edge id="107656" label="LYL1 (interacts with) MAN2B1" source="105911" target="105777" cy:directed="1"/>
      <edge id="107655" label="LYL1 (interacts with) FUT7" source="105911" target="105685" cy:directed="1"/>
      <edge id="107654" label="LYL1 (interacts with) MFNG" source="105911" target="105766" cy:directed="1"/>
      <edge id="107653" label="LIN9 (interacts with) RTF1" source="107321" target="105700" cy:directed="1"/>
      <edge id="107652" label="LEF1 (interacts with) ST6GAL2" source="106875" target="105720" cy:directed="1"/>
      <edge id="107651" label="LDB1 (interacts with) HK1" source="107320" target="107293" cy:directed="1"/>
      <edge id="107650" label="KLF5 (interacts with) FUT2" source="107318" target="107287" cy:directed="1"/>
      <edge id="107649" label="KLF5 (interacts with) ABO" source="107318" target="107319" cy:directed="1"/>
      <edge id="107648" label="KLF5 (interacts with) SLC35A3" source="107318" target="105695" cy:directed="1"/>
      <edge id="107647" label="KLF4 (interacts with) HAS3" source="107317" target="105941" cy:directed="1"/>
      <edge id="107646" label="KLF4 (interacts with) B3GNT5" source="107317" target="105707" cy:directed="1"/>
      <edge id="107645" label="KLF11 (interacts with) FAM20B" source="107316" target="105731" cy:directed="1"/>
      <edge id="107644" label="KDM6B (interacts with) ACER2" source="107315" target="105691" cy:directed="1"/>
      <edge id="107643" label="KDM5C (interacts with) COG7" source="107314" target="105791" cy:directed="1"/>
      <edge id="107642" label="KDM5C (interacts with) MAN1A2" source="107314" target="105687" cy:directed="1"/>
      <edge id="107641" label="KDM5B (interacts with) FPGT" source="105907" target="105976" cy:directed="1"/>
      <edge id="107640" label="KDM5B (interacts with) SLC35D1" source="105907" target="105950" cy:directed="1"/>
      <edge id="107639" label="KDM5B (interacts with) MAN2A1" source="105907" target="105694" cy:directed="1"/>
      <edge id="107638" label="KDM5B (interacts with) SLC35A3" source="105907" target="105695" cy:directed="1"/>
      <edge id="107637" label="KDM5B (interacts with) PIGN" source="105907" target="105730" cy:directed="1"/>
      <edge id="107636" label="KDM5B (interacts with) ACER2" source="105907" target="105691" cy:directed="1"/>
      <edge id="107635" label="KDM5B (interacts with) STT3B" source="105907" target="105688" cy:directed="1"/>
      <edge id="107634" label="KDM5B (interacts with) MAN1A2" source="105907" target="105687" cy:directed="1"/>
      <edge id="107633" label="KDM5A (interacts with) NDST2" source="105904" target="105772" cy:directed="1"/>
      <edge id="107632" label="KDM5A (interacts with) SLC35A5" source="105904" target="105702" cy:directed="1"/>
      <edge id="107631" label="KDM5A (interacts with) FUT11" source="105904" target="105690" cy:directed="1"/>
      <edge id="107630" label="KDM5A (interacts with) MAN2A1" source="105904" target="105694" cy:directed="1"/>
      <edge id="107629" label="KDM5A (interacts with) NEU3" source="105904" target="105689" cy:directed="1"/>
      <edge id="107628" label="KDM5A (interacts with) ALG10" source="105904" target="105711" cy:directed="1"/>
      <edge id="107627" label="KDM3A (interacts with) SLC35A3" source="105903" target="105695" cy:directed="1"/>
      <edge id="107626" label="KDM2B (interacts with) MGAT3" source="107313" target="105750" cy:directed="1"/>
      <edge id="107625" label="KDM2B (interacts with) RTF1" source="107313" target="105700" cy:directed="1"/>
      <edge id="107624" label="KDM2B (interacts with) MAN2A2" source="107313" target="105748" cy:directed="1"/>
      <edge id="107623" label="KAT2B (interacts with) MAN2A1" source="107312" target="105694" cy:directed="1"/>
      <edge id="107622" label="KAT2B (interacts with) PAPSS1" source="107312" target="107291" cy:directed="1"/>
      <edge id="107621" label="KAT2B (interacts with) COG6" source="107312" target="105824" cy:directed="1"/>
      <edge id="107620" label="JARID2 (interacts with) HAS3" source="107311" target="105941" cy:directed="1"/>
      <edge id="107619" label="IRF8 (interacts with) NAAA" source="105890" target="107310" cy:directed="1"/>
      <edge id="107618" label="IRF8 (interacts with) FUCA1" source="105890" target="106856" cy:directed="1"/>
      <edge id="107617" label="IRF8 (interacts with) MGAT4A" source="105890" target="106860" cy:directed="1"/>
      <edge id="107616" label="IRF8 (interacts with) LIPA" source="105890" target="105884" cy:directed="1"/>
      <edge id="107615" label="IRF8 (interacts with) ST8SIA4" source="105890" target="105834" cy:directed="1"/>
      <edge id="107614" label="IRF8 (interacts with) HK3" source="105890" target="105859" cy:directed="1"/>
      <edge id="107613" label="IRF4 (interacts with) ST3GAL5" source="105888" target="106857" cy:directed="1"/>
      <edge id="107612" label="IRF4 (interacts with) ST8SIA4" source="105888" target="105834" cy:directed="1"/>
      <edge id="107611" label="IRF4 (interacts with) FUT7" source="105888" target="105685" cy:directed="1"/>
      <edge id="107610" label="IRF4 (interacts with) MFNG" source="105888" target="105766" cy:directed="1"/>
      <edge id="107609" label="IRF2 (interacts with) ST8SIA4" source="106871" target="105834" cy:directed="1"/>
      <edge id="107608" label="IRF2 (interacts with) LAMP3" source="106871" target="105776" cy:directed="1"/>
      <edge id="107607" label="IRF1 (interacts with) ST3GAL5" source="105887" target="106857" cy:directed="1"/>
      <edge id="107606" label="IRF1 (interacts with) ST8SIA4" source="105887" target="105834" cy:directed="1"/>
      <edge id="107605" label="IRF1 (interacts with) HK3" source="105887" target="105859" cy:directed="1"/>
      <edge id="107604" label="INTS3 (interacts with) GBA" source="105886" target="107309" cy:directed="1"/>
      <edge id="107603" label="INTS3 (interacts with) B4GALT3" source="105886" target="105789" cy:directed="1"/>
      <edge id="107602" label="INO80 (interacts with) RTF1" source="105885" target="105700" cy:directed="1"/>
      <edge id="107601" label="IKZF1 (interacts with) NDST2" source="105882" target="105772" cy:directed="1"/>
      <edge id="107600" label="IKZF1 (interacts with) MAN1C1" source="105882" target="106853" cy:directed="1"/>
      <edge id="107599" label="IKZF1 (interacts with) ST3GAL5" source="105882" target="106857" cy:directed="1"/>
      <edge id="107598" label="IKZF1 (interacts with) MAN2B1" source="105882" target="105777" cy:directed="1"/>
      <edge id="107597" label="IKZF1 (interacts with) MGAT4A" source="105882" target="106860" cy:directed="1"/>
      <edge id="107596" label="IKZF1 (interacts with) ST8SIA4" source="105882" target="105834" cy:directed="1"/>
      <edge id="107595" label="IKZF1 (interacts with) MFNG" source="105882" target="105766" cy:directed="1"/>
      <edge id="107594" label="HSF1 (interacts with) TSTA3" source="105879" target="105880" cy:directed="1"/>
      <edge id="107593" label="HOXA6 (interacts with) FUT11" source="107308" target="105690" cy:directed="1"/>
      <edge id="107592" label="HINFP (interacts with) STT3A" source="105877" target="106893" cy:directed="1"/>
      <edge id="107591" label="HINFP (interacts with) DPAGT1" source="105877" target="105878" cy:directed="1"/>
      <edge id="107590" label="HIF1A (interacts with) GALNT10" source="106867" target="105697" cy:directed="1"/>
      <edge id="107589" label="HIF1A (interacts with) EXT2" source="106867" target="107307" cy:directed="1"/>
      <edge id="107588" label="HIF1A (interacts with) GALNT2" source="106867" target="107306" cy:directed="1"/>
      <edge id="107587" label="HIF1A (interacts with) CHSY1" source="106867" target="105717" cy:directed="1"/>
      <edge id="107586" label="HIF1A (interacts with) MAN2A1" source="106867" target="105694" cy:directed="1"/>
      <edge id="107585" label="HECTD1 (interacts with) FUT11" source="105875" target="105690" cy:directed="1"/>
      <edge id="107584" label="HDAC3 (interacts with) GNPDA1" source="107304" target="107305" cy:directed="1"/>
      <edge id="107583" label="HDAC1 (interacts with) PIGN" source="107303" target="105730" cy:directed="1"/>
      <edge id="107582" label="HDAC1 (interacts with) CMAS" source="107303" target="105742" cy:directed="1"/>
      <edge id="107581" label="HCFC1 (interacts with) ACER2" source="105873" target="105691" cy:directed="1"/>
      <edge id="107580" label="HCFC1 (interacts with) SLC35E1" source="105873" target="106844" cy:directed="1"/>
      <edge id="107579" label="HCFC1 (interacts with) COG8" source="105873" target="106891" cy:directed="1"/>
      <edge id="107578" label="HCFC1 (interacts with) NDST2" source="105873" target="105772" cy:directed="1"/>
      <edge id="107577" label="HCFC1 (interacts with) MAN1A2" source="105873" target="105687" cy:directed="1"/>
      <edge id="107576" label="HCFC1 (interacts with) PIGO" source="105873" target="105874" cy:directed="1"/>
      <edge id="107575" label="HCFC1 (interacts with) NEU3" source="105873" target="105689" cy:directed="1"/>
      <edge id="107574" label="GTF3C2 (interacts with) MAN2A2" source="107302" target="105748" cy:directed="1"/>
      <edge id="107573" label="GRHL2 (interacts with) MAN1A2" source="107301" target="105687" cy:directed="1"/>
      <edge id="107572" label="GRHL2 (interacts with) NDST2" source="107301" target="105772" cy:directed="1"/>
      <edge id="107571" label="GRHL2 (interacts with) PIGN" source="107301" target="105730" cy:directed="1"/>
      <edge id="107570" label="GRHL2 (interacts with) RTF1" source="107301" target="105700" cy:directed="1"/>
      <edge id="107569" label="GRHL2 (interacts with) FAM20B" source="107301" target="105731" cy:directed="1"/>
      <edge id="107568" label="GRHL1 (interacts with) PIGN" source="106866" target="105730" cy:directed="1"/>
      <edge id="107567" label="GRHL1 (interacts with) B3GNT5" source="106866" target="105707" cy:directed="1"/>
      <edge id="107566" label="GLYR1 (interacts with) NDST2" source="105866" target="105772" cy:directed="1"/>
      <edge id="107565" label="GLYR1 (interacts with) ALG1" source="105866" target="105867" cy:directed="1"/>
      <edge id="107564" label="GLYR1 (interacts with) COG7" source="105866" target="105791" cy:directed="1"/>
      <edge id="107563" label="GATA6 (interacts with) FUT4" source="105862" target="105810" cy:directed="1"/>
      <edge id="107562" label="GAPDH (interacts with) GPI" source="106863" target="106864" cy:directed="1"/>
      <edge id="107561" label="GABPA (interacts with) ASAH1" source="105861" target="107290" cy:directed="1"/>
      <edge id="107560" label="GABPA (interacts with) NDST2" source="105861" target="105772" cy:directed="1"/>
      <edge id="107559" label="GABPA (interacts with) RTF1" source="105861" target="105700" cy:directed="1"/>
      <edge id="107558" label="GABPA (interacts with) SLC35A3" source="105861" target="105695" cy:directed="1"/>
      <edge id="107557" label="GABPA (interacts with) PIGN" source="105861" target="105730" cy:directed="1"/>
      <edge id="107556" label="GABPA (interacts with) COG3" source="105861" target="105823" cy:directed="1"/>
      <edge id="107555" label="GABPA (interacts with) SLC35A5" source="105861" target="105702" cy:directed="1"/>
      <edge id="107554" label="FOXP3 (interacts with) MAN2B1" source="105858" target="105777" cy:directed="1"/>
      <edge id="107553" label="FOXP3 (interacts with) MGAT4A" source="105858" target="106860" cy:directed="1"/>
      <edge id="107552" label="FOXP3 (interacts with) ST3GAL5" source="105858" target="106857" cy:directed="1"/>
      <edge id="107551" label="FOXP3 (interacts with) MFNG" source="105858" target="105766" cy:directed="1"/>
      <edge id="107550" label="FOXP3 (interacts with) HK3" source="105858" target="105859" cy:directed="1"/>
      <edge id="107549" label="FOXP3 (interacts with) ST8SIA4" source="105858" target="105834" cy:directed="1"/>
      <edge id="107548" label="FOXP3 (interacts with) FUT7" source="105858" target="105685" cy:directed="1"/>
      <edge id="107547" label="FOXO1 (interacts with) B3GNT2" source="105856" target="106838" cy:directed="1"/>
      <edge id="107546" label="FOXO1 (interacts with) FKTN" source="105856" target="105713" cy:directed="1"/>
      <edge id="107545" label="FOXO1 (interacts with) ALG11" source="105856" target="107300" cy:directed="1"/>
      <edge id="107544" label="FOXO1 (interacts with) SLC35A5" source="105856" target="105702" cy:directed="1"/>
      <edge id="107543" label="FOXO1 (interacts with) COG6" source="105856" target="105824" cy:directed="1"/>
      <edge id="107542" label="FOXK1 (interacts with) EXTL3" source="107298" target="107299" cy:directed="1"/>
      <edge id="107541" label="FOXK1 (interacts with) SLC35E1" source="107298" target="106844" cy:directed="1"/>
      <edge id="107540" label="FOXK1 (interacts with) NDST1" source="107298" target="105923" cy:directed="1"/>
      <edge id="107539" label="FOXA1 (interacts with) GNE" source="105850" target="107297" cy:directed="1"/>
      <edge id="107538" label="FOXA1 (interacts with) COG7" source="105850" target="105791" cy:directed="1"/>
      <edge id="107537" label="FOXA1 (interacts with) GCNT2" source="105850" target="107296" cy:directed="1"/>
      <edge id="107536" label="FOXA1 (interacts with) COG5" source="105850" target="105692" cy:directed="1"/>
      <edge id="107535" label="FOXA1 (interacts with) SLC35A3" source="105850" target="105695" cy:directed="1"/>
      <edge id="107534" label="FOXA1 (interacts with) ST6GALNAC1" source="105850" target="105920" cy:directed="1"/>
      <edge id="107533" label="FOXA1 (interacts with) GALNT7" source="105850" target="106859" cy:directed="1"/>
      <edge id="107532" label="FOXA1 (interacts with) GALNT4" source="105850" target="105703" cy:directed="1"/>
      <edge id="107531" label="FOSL2 (interacts with) SLC35A3" source="107295" target="105695" cy:directed="1"/>
      <edge id="107530" label="FOSL2 (interacts with) NEU3" source="107295" target="105689" cy:directed="1"/>
      <edge id="107529" label="FOSL2 (interacts with) MGAT5" source="107295" target="105893" cy:directed="1"/>
      <edge id="107528" label="FOSL2 (interacts with) UGCG" source="107295" target="105985" cy:directed="1"/>
      <edge id="107527" label="FOSL1 (interacts with) HAS3" source="107294" target="105941" cy:directed="1"/>
      <edge id="107526" label="FLI1 (interacts with) ST3GAL2" source="105848" target="105806" cy:directed="1"/>
      <edge id="107525" label="ERCC6 (interacts with) HK1" source="105830" target="107293" cy:directed="1"/>
      <edge id="107524" label="ERCC6 (interacts with) COG8" source="105830" target="106891" cy:directed="1"/>
      <edge id="107523" label="ERCC6 (interacts with) SLC35D1" source="105830" target="105950" cy:directed="1"/>
      <edge id="107522" label="ERCC6 (interacts with) SLC35A3" source="105830" target="105695" cy:directed="1"/>
      <edge id="107521" label="ERCC6 (interacts with) UGCG" source="105830" target="105985" cy:directed="1"/>
      <edge id="107520" label="ERCC6 (interacts with) SLC35F5" source="105830" target="105696" cy:directed="1"/>
      <edge id="107519" label="ERCC6 (interacts with) COG6" source="105830" target="105824" cy:directed="1"/>
      <edge id="107518" label="ERCC6 (interacts with) MAN2A1" source="105830" target="105694" cy:directed="1"/>
      <edge id="107517" label="ERCC6 (interacts with) ACER2" source="105830" target="105691" cy:directed="1"/>
      <edge id="107516" label="ERCC6 (interacts with) COG5" source="105830" target="105692" cy:directed="1"/>
      <edge id="107515" label="ERCC6 (interacts with) NDST2" source="105830" target="105772" cy:directed="1"/>
      <edge id="107514" label="ERCC6 (interacts with) STT3B" source="105830" target="105688" cy:directed="1"/>
      <edge id="107513" label="ERCC6 (interacts with) MAN1A2" source="105830" target="105687" cy:directed="1"/>
      <edge id="107512" label="ERCC3 (interacts with) SLC35E3" source="107292" target="105732" cy:directed="1"/>
      <edge id="107511" label="EP400 (interacts with) PIGO" source="105829" target="105874" cy:directed="1"/>
      <edge id="107510" label="EP400 (interacts with) FUT11" source="105829" target="105690" cy:directed="1"/>
      <edge id="107509" label="EP400 (interacts with) ACER2" source="105829" target="105691" cy:directed="1"/>
      <edge id="107508" label="EP400 (interacts with) OGT" source="105829" target="105771" cy:directed="1"/>
      <edge id="107507" label="EP400 (interacts with) STT3B" source="105829" target="105688" cy:directed="1"/>
      <edge id="107506" label="EP400 (interacts with) FKTN" source="105829" target="105713" cy:directed="1"/>
      <edge id="107505" label="ELK3 (interacts with) FUT11" source="105826" target="105690" cy:directed="1"/>
      <edge id="107504" label="ELF1 (interacts with) PAPSS1" source="105822" target="107291" cy:directed="1"/>
      <edge id="107503" label="ELF1 (interacts with) RTF1" source="105822" target="105700" cy:directed="1"/>
      <edge id="107502" label="ELF1 (interacts with) PIGN" source="105822" target="105730" cy:directed="1"/>
      <edge id="107501" label="ELF1 (interacts with) MAN1A2" source="105822" target="105687" cy:directed="1"/>
      <edge id="107500" label="ELF1 (interacts with) SLC35A3" source="105822" target="105695" cy:directed="1"/>
      <edge id="107499" label="ELF1 (interacts with) SLC35A5" source="105822" target="105702" cy:directed="1"/>
      <edge id="107498" label="ELF1 (interacts with) COG6" source="105822" target="105824" cy:directed="1"/>
      <edge id="107497" label="ELF1 (interacts with) COG3" source="105822" target="105823" cy:directed="1"/>
      <edge id="107496" label="EHF (interacts with) ASAH1" source="105819" target="107290" cy:directed="1"/>
      <edge id="107495" label="EHF (interacts with) FUT3" source="105819" target="107289" cy:directed="1"/>
      <edge id="107494" label="EHF (interacts with) FUT6" source="105819" target="107288" cy:directed="1"/>
      <edge id="107493" label="EHF (interacts with) FUT11" source="105819" target="105690" cy:directed="1"/>
      <edge id="107492" label="EHF (interacts with) FUT2" source="105819" target="107287" cy:directed="1"/>
      <edge id="107491" label="EHF (interacts with) ACER2" source="105819" target="105691" cy:directed="1"/>
      <edge id="107490" label="EHF (interacts with) MAN1A2" source="105819" target="105687" cy:directed="1"/>
      <edge id="107489" label="EHF (interacts with) STT3B" source="105819" target="105688" cy:directed="1"/>
      <edge id="107488" label="EHF (interacts with) COG5" source="105819" target="105692" cy:directed="1"/>
      <edge id="107487" label="EHF (interacts with) MAN2A1" source="105819" target="105694" cy:directed="1"/>
      <edge id="107486" label="EHF (interacts with) SLC35A3" source="105819" target="105695" cy:directed="1"/>
      <edge id="107485" label="EED (interacts with) STT3A" source="107285" target="106893" cy:directed="1"/>
      <edge id="107484" label="EED (interacts with) DPAGT1" source="107285" target="105878" cy:directed="1"/>
      <edge id="107483" label="EED (interacts with) ALG8" source="107285" target="107286" cy:directed="1"/>
      <edge id="107482" label="E2F7 (interacts with) FUT11" source="105803" target="105690" cy:directed="1"/>
      <edge id="107481" label="E2F7 (interacts with) ACER2" source="105803" target="105691" cy:directed="1"/>
      <edge id="107480" label="E2F7 (interacts with) SLC35D1" source="105803" target="105950" cy:directed="1"/>
      <edge id="107479" label="E2F7 (interacts with) ALG10B" source="105803" target="105727" cy:directed="1"/>
      <edge id="107478" label="E2F7 (interacts with) RTF1" source="105803" target="105700" cy:directed="1"/>
      <edge id="107477" label="E2F3 (interacts with) SLC35F5" source="107284" target="105696" cy:directed="1"/>
      <edge id="107476" label="E2F3 (interacts with) UGGT1" source="107284" target="105705" cy:directed="1"/>
      <edge id="107475" label="E2F1 (interacts with) PMM1" source="105796" target="105735" cy:directed="1"/>
      <edge id="107474" label="DNMT3A (interacts with) GAL3ST2" source="107282" target="107283" cy:directed="1"/>
      <edge id="107473" label="DNMT3A (interacts with) MAN2A2" source="107282" target="105748" cy:directed="1"/>
      <edge id="107472" label="DNMT3A (interacts with) SLC35E3" source="107282" target="105732" cy:directed="1"/>
      <edge id="107471" label="DEK (interacts with) SLC35B3" source="105795" target="107281" cy:directed="1"/>
      <edge id="107470" label="CREBBP (interacts with) PIGO" source="105790" target="105874" cy:directed="1"/>
      <edge id="107469" label="CREBBP (interacts with) PIGN" source="105790" target="105730" cy:directed="1"/>
      <edge id="107468" label="CREBBP (interacts with) NDST2" source="105790" target="105772" cy:directed="1"/>
      <edge id="107467" label="CREBBP (interacts with) ACER2" source="105790" target="105691" cy:directed="1"/>
      <edge id="107466" label="CREBBP (interacts with) NEU3" source="105790" target="105689" cy:directed="1"/>
      <edge id="107465" label="CREBBP (interacts with) MAN1A2" source="105790" target="105687" cy:directed="1"/>
      <edge id="107464" label="CREBBP (interacts with) FUT11" source="105790" target="105690" cy:directed="1"/>
      <edge id="107463" label="CREB1 (interacts with) FUT11" source="105785" target="105690" cy:directed="1"/>
      <edge id="107462" label="CPSF3L (interacts with) B3GALT6" source="105780" target="105781" cy:directed="1"/>
      <edge id="107461" label="CLOCK (interacts with) FUT11" source="106849" target="105690" cy:directed="1"/>
      <edge id="107460" label="CHD8 (interacts with) SLC35E1" source="105774" target="106844" cy:directed="1"/>
      <edge id="107459" label="CHD8 (interacts with) COG8" source="105774" target="106891" cy:directed="1"/>
      <edge id="107458" label="CHD8 (interacts with) SLC35A3" source="105774" target="105695" cy:directed="1"/>
      <edge id="107457" label="CHD8 (interacts with) ACER2" source="105774" target="105691" cy:directed="1"/>
      <edge id="107456" label="CHD8 (interacts with) NDST2" source="105774" target="105772" cy:directed="1"/>
      <edge id="107455" label="CHD8 (interacts with) PIGO" source="105774" target="105874" cy:directed="1"/>
      <edge id="107454" label="CHD8 (interacts with) FUT11" source="105774" target="105690" cy:directed="1"/>
      <edge id="107453" label="CHD8 (interacts with) STT3B" source="105774" target="105688" cy:directed="1"/>
      <edge id="107452" label="CHD8 (interacts with) NEU3" source="105774" target="105689" cy:directed="1"/>
      <edge id="107451" label="CHD2 (interacts with) PIGN" source="105770" target="105730" cy:directed="1"/>
      <edge id="107450" label="CHD2 (interacts with) CHSY1" source="105770" target="105717" cy:directed="1"/>
      <edge id="107449" label="CHD2 (interacts with) RTF1" source="105770" target="105700" cy:directed="1"/>
      <edge id="107448" label="CHD2 (interacts with) SLC35E1" source="105770" target="106844" cy:directed="1"/>
      <edge id="107447" label="CHD2 (interacts with) MAN2A2" source="105770" target="105748" cy:directed="1"/>
      <edge id="107446" label="CHD2 (interacts with) MAN1A2" source="105770" target="105687" cy:directed="1"/>
      <edge id="107445" label="CHD1 (interacts with) SLC35A5" source="105769" target="105702" cy:directed="1"/>
      <edge id="107444" label="CHD1 (interacts with) MAN1A2" source="105769" target="105687" cy:directed="1"/>
      <edge id="107443" label="CHD1 (interacts with) NEU3" source="105769" target="105689" cy:directed="1"/>
      <edge id="107442" label="CHD1 (interacts with) CSGALNACT2" source="105769" target="105715" cy:directed="1"/>
      <edge id="107441" label="CHD1 (interacts with) STT3B" source="105769" target="105688" cy:directed="1"/>
      <edge id="107440" label="CHD1 (interacts with) MAN2A1" source="105769" target="105694" cy:directed="1"/>
      <edge id="107439" label="CEBPA (interacts with) HS3ST6" source="105764" target="107280" cy:directed="1"/>
      <edge id="107438" label="CEBPA (interacts with) NAGK" source="105764" target="105765" cy:directed="1"/>
      <edge id="107437" label="CDK8 (interacts with) ACER2" source="105756" target="105691" cy:directed="1"/>
      <edge id="107436" label="CDK8 (interacts with) SLC35E1" source="105756" target="106844" cy:directed="1"/>
      <edge id="107435" label="CDK8 (interacts with) UGCG" source="105756" target="105985" cy:directed="1"/>
      <edge id="107434" label="CDK8 (interacts with) SLC35D1" source="105756" target="105950" cy:directed="1"/>
      <edge id="107433" label="CDK8 (interacts with) SLC35A3" source="105756" target="105695" cy:directed="1"/>
      <edge id="107432" label="CDK8 (interacts with) FUT11" source="105756" target="105690" cy:directed="1"/>
      <edge id="107431" label="CDK8 (interacts with) COG3" source="105756" target="105823" cy:directed="1"/>
      <edge id="107430" label="CDK8 (interacts with) MAN1A2" source="105756" target="105687" cy:directed="1"/>
      <edge id="107429" label="CDK8 (interacts with) NEU3" source="105756" target="105689" cy:directed="1"/>
      <edge id="107428" label="CDK8 (interacts with) STT3B" source="105756" target="105688" cy:directed="1"/>
      <edge id="107427" label="CDK12 (interacts with) NEU3" source="106848" target="105689" cy:directed="1"/>
      <edge id="107426" label="CDK12 (interacts with) COG8" source="106848" target="106891" cy:directed="1"/>
      <edge id="107425" label="CDK12 (interacts with) SLC35E1" source="106848" target="106844" cy:directed="1"/>
      <edge id="107424" label="CDK12 (interacts with) ACER2" source="106848" target="105691" cy:directed="1"/>
      <edge id="107423" label="CDK12 (interacts with) GANAB" source="106848" target="105998" cy:directed="1"/>
      <edge id="107422" label="CDK12 (interacts with) PIGO" source="106848" target="105874" cy:directed="1"/>
      <edge id="107421" label="CBX7 (interacts with) GAL3ST4" source="105745" target="105778" cy:directed="1"/>
      <edge id="107420" label="CBX7 (interacts with) OGT" source="105745" target="105771" cy:directed="1"/>
      <edge id="107419" label="CBX7 (interacts with) COG7" source="105745" target="105791" cy:directed="1"/>
      <edge id="107418" label="CBX7 (interacts with) FAM20B" source="105745" target="105731" cy:directed="1"/>
      <edge id="107417" label="CBX7 (interacts with) MAN1C1" source="105745" target="106853" cy:directed="1"/>
      <edge id="107416" label="CBFB (interacts with) COG6" source="105739" target="105824" cy:directed="1"/>
      <edge id="107415" label="CASP8AP2 (interacts with) SLC35A5" source="105738" target="105702" cy:directed="1"/>
      <edge id="107414" label="CASP8AP2 (interacts with) ALG10B" source="105738" target="105727" cy:directed="1"/>
      <edge id="107413" label="BRD4 (interacts with) SLC35D1" source="106843" target="105950" cy:directed="1"/>
      <edge id="107412" label="BRD4 (interacts with) PIGO" source="106843" target="105874" cy:directed="1"/>
      <edge id="107411" label="BRD4 (interacts with) POFUT1" source="106843" target="105792" cy:directed="1"/>
      <edge id="107410" label="BRD4 (interacts with) NEU3" source="106843" target="105689" cy:directed="1"/>
      <edge id="107409" label="BRD4 (interacts with) MAN1A2" source="106843" target="105687" cy:directed="1"/>
      <edge id="107408" label="BRD4 (interacts with) FUT11" source="106843" target="105690" cy:directed="1"/>
      <edge id="107407" label="BRD4 (interacts with) UGCG" source="106843" target="105985" cy:directed="1"/>
      <edge id="107406" label="BRD4 (interacts with) STT3B" source="106843" target="105688" cy:directed="1"/>
      <edge id="107405" label="BRD4 (interacts with) SLC35E1" source="106843" target="106844" cy:directed="1"/>
      <edge id="107404" label="BRD3 (interacts with) B4GALT5" source="107277" target="107279" cy:directed="1"/>
      <edge id="107403" label="BRD3 (interacts with) PIGO" source="107277" target="105874" cy:directed="1"/>
      <edge id="107402" label="BRD3 (interacts with) SLC35A3" source="107277" target="105695" cy:directed="1"/>
      <edge id="107401" label="BRD3 (interacts with) FUT10" source="107277" target="107278" cy:directed="1"/>
      <edge id="107400" label="BRD3 (interacts with) UGCG" source="107277" target="105985" cy:directed="1"/>
      <edge id="107399" label="BRD3 (interacts with) STT3B" source="107277" target="105688" cy:directed="1"/>
      <edge id="107398" label="BRD3 (interacts with) RTF1" source="107277" target="105700" cy:directed="1"/>
      <edge id="107397" label="BRD2 (interacts with) MAN1A2" source="107276" target="105687" cy:directed="1"/>
      <edge id="107396" label="BRD2 (interacts with) ALG10B" source="107276" target="105727" cy:directed="1"/>
      <edge id="107395" label="BRD2 (interacts with) NEU3" source="107276" target="105689" cy:directed="1"/>
      <edge id="107394" label="BRD2 (interacts with) STT3B" source="107276" target="105688" cy:directed="1"/>
      <edge id="107393" label="BRD1 (interacts with) ACER2" source="105733" target="105691" cy:directed="1"/>
      <edge id="107392" label="BRD1 (interacts with) RTF1" source="105733" target="105700" cy:directed="1"/>
      <edge id="107391" label="BRD1 (interacts with) NDST2" source="105733" target="105772" cy:directed="1"/>
      <edge id="107390" label="BRD1 (interacts with) MAN2A2" source="105733" target="105748" cy:directed="1"/>
      <edge id="107389" label="BRD1 (interacts with) ALG12" source="105733" target="105734" cy:directed="1"/>
      <edge id="107388" label="BRCA1 (interacts with) MAN1A2" source="105728" target="105687" cy:directed="1"/>
      <edge id="107387" label="BRCA1 (interacts with) STT3B" source="105728" target="105688" cy:directed="1"/>
      <edge id="107386" label="BRCA1 (interacts with) ALG10B" source="105728" target="105727" cy:directed="1"/>
      <edge id="107385" label="BRCA1 (interacts with) SLC35A3" source="105728" target="105695" cy:directed="1"/>
      <edge id="107384" label="BRCA1 (interacts with) PIGN" source="105728" target="105730" cy:directed="1"/>
      <edge id="107383" label="BRCA1 (interacts with) PIGO" source="105728" target="105874" cy:directed="1"/>
      <edge id="107382" label="BRCA1 (interacts with) UGGT1" source="105728" target="105705" cy:directed="1"/>
      <edge id="107381" label="BRCA1 (interacts with) ALG10" source="105728" target="105711" cy:directed="1"/>
      <edge id="107380" label="BRCA1 (interacts with) PIGW" source="105728" target="105729" cy:directed="1"/>
      <edge id="107379" label="BCL6 (interacts with) PIGN" source="107275" target="105730" cy:directed="1"/>
      <edge id="107378" label="BCL6 (interacts with) COG5" source="107275" target="105692" cy:directed="1"/>
      <edge id="107377" label="BATF (interacts with) MGAT4A" source="105721" target="106860" cy:directed="1"/>
      <edge id="107376" label="BATF (interacts with) ST8SIA4" source="105721" target="105834" cy:directed="1"/>
      <edge id="107375" label="BATF (interacts with) ST3GAL5" source="105721" target="106857" cy:directed="1"/>
      <edge id="107374" label="BATF (interacts with) FUCA1" source="105721" target="106856" cy:directed="1"/>
      <edge id="107373" label="BATF (interacts with) FUT7" source="105721" target="105685" cy:directed="1"/>
      <edge id="107372" label="BACH1 (interacts with) NEU3" source="105714" target="105689" cy:directed="1"/>
      <edge id="107371" label="BACH1 (interacts with) ACER2" source="105714" target="105691" cy:directed="1"/>
      <edge id="107370" label="BACH1 (interacts with) FUT11" source="105714" target="105690" cy:directed="1"/>
      <edge id="107369" label="BACH1 (interacts with) MAN1A2" source="105714" target="105687" cy:directed="1"/>
      <edge id="107368" label="BACH1 (interacts with) UGCG" source="105714" target="105985" cy:directed="1"/>
      <edge id="107367" label="ATF1 (interacts with) B4GALT1" source="105701" target="107274" cy:directed="1"/>
      <edge id="107366" label="ATF1 (interacts with) CHSY1" source="105701" target="105717" cy:directed="1"/>
      <edge id="107365" label="ATF1 (interacts with) CSGALNACT2" source="105701" target="105715" cy:directed="1"/>
      <edge id="107364" label="ATF1 (interacts with) GANAB" source="105701" target="105998" cy:directed="1"/>
      <edge id="107363" label="ATF1 (interacts with) SLC35E3" source="105701" target="105732" cy:directed="1"/>
      <edge id="107362" label="ATF1 (interacts with) STT3B" source="105701" target="105688" cy:directed="1"/>
      <edge id="107361" label="ASH2L (interacts with) COG7" source="107273" target="105791" cy:directed="1"/>
      <edge id="107360" label="ARID2 (interacts with) COG6" source="105699" target="105824" cy:directed="1"/>
      <edge id="107359" label="ARID2 (interacts with) RTF1" source="105699" target="105700" cy:directed="1"/>
      <edge id="107358" label="AHR (interacts with) UGCG" source="106836" target="105985" cy:directed="1"/>
      <edge id="107357" label="ADNP (interacts with) FUT7" source="105684" target="105685" cy:directed="1"/>
    </graph>
  </att>
  <att>
    <graph id="107960" label="COAD_READ" cy:registered="1">
      <node xlink:href="#106031"/>
      <node id="108039" label="ZBTB2"/>
      <node xlink:href="#106028"/>
      <node xlink:href="#106026"/>
      <node id="108038" label="GMPPB"/>
      <node id="108037" label="XBP1"/>
      <node xlink:href="#106024"/>
      <node xlink:href="#106879"/>
      <node xlink:href="#106019"/>
      <node xlink:href="#106018"/>
      <node xlink:href="#106890"/>
      <node id="108036" label="TFDP1"/>
      <node id="108035" label="TEAD4"/>
      <node xlink:href="#106013"/>
      <node xlink:href="#106011"/>
      <node id="108034" label="B3GALT5"/>
      <node xlink:href="#106010"/>
      <node xlink:href="#106008"/>
      <node id="108033" label="HS3ST3A1"/>
      <node id="108032" label="B3GNT9"/>
      <node id="108031" label="TCF21"/>
      <node xlink:href="#106007"/>
      <node id="108030" label="TBP"/>
      <node xlink:href="#107351"/>
      <node xlink:href="#105864"/>
      <node xlink:href="#106006"/>
      <node xlink:href="#107349"/>
      <node xlink:href="#106004"/>
      <node id="108029" label="STAT5B"/>
      <node xlink:href="#107347"/>
      <node xlink:href="#105860"/>
      <node xlink:href="#105883"/>
      <node xlink:href="#105999"/>
      <node xlink:href="#105995"/>
      <node id="108028" label="SRC"/>
      <node xlink:href="#105993"/>
      <node id="108027" label="PIGA"/>
      <node xlink:href="#105989"/>
      <node xlink:href="#107344"/>
      <node xlink:href="#107341"/>
      <node xlink:href="#105749"/>
      <node xlink:href="#107339"/>
      <node id="108026" label="GLA"/>
      <node xlink:href="#105845"/>
      <node id="108025" label="SCML2"/>
      <node xlink:href="#107338"/>
      <node xlink:href="#105982"/>
      <node xlink:href="#105981"/>
      <node xlink:href="#105805"/>
      <node xlink:href="#105978"/>
      <node xlink:href="#105975"/>
      <node xlink:href="#105974"/>
      <node xlink:href="#105970"/>
      <node id="108024" label="RELA"/>
      <node id="108023" label="POMT2"/>
      <node xlink:href="#105969"/>
      <node xlink:href="#105968"/>
      <node id="108022" label="RBL1"/>
      <node xlink:href="#105731"/>
      <node xlink:href="#105967"/>
      <node xlink:href="#105965"/>
      <node id="108021" label="PRDM4"/>
      <node xlink:href="#107274"/>
      <node xlink:href="#105962"/>
      <node xlink:href="#105960"/>
      <node xlink:href="#105959"/>
      <node id="108020" label="PIGB"/>
      <node xlink:href="#105958"/>
      <node xlink:href="#106032"/>
      <node xlink:href="#107350"/>
      <node xlink:href="#107335"/>
      <node xlink:href="#107334"/>
      <node xlink:href="#105956"/>
      <node id="108019" label="PDX1"/>
      <node id="108018" label="CHST14"/>
      <node xlink:href="#105843"/>
      <node id="108017" label="NR2F2"/>
      <node xlink:href="#105771"/>
      <node xlink:href="#105949"/>
      <node xlink:href="#105948"/>
      <node id="108016" label="NOTCH1"/>
      <node xlink:href="#105947"/>
      <node xlink:href="#105954"/>
      <node xlink:href="#107329"/>
      <node id="108015" label="B4GALNT3"/>
      <node xlink:href="#107326"/>
      <node xlink:href="#105896"/>
      <node xlink:href="#105942"/>
      <node xlink:href="#106887"/>
      <node id="108014" label="MGAT5B"/>
      <node id="108013" label="CHST10"/>
      <node id="108012" label="ST8SIA3"/>
      <node id="108011" label="CHST8"/>
      <node id="108010" label="CHST1"/>
      <node xlink:href="#105937"/>
      <node id="108009" label="MYC"/>
      <node xlink:href="#105935"/>
      <node xlink:href="#105933"/>
      <node xlink:href="#105931"/>
      <node xlink:href="#106878"/>
      <node xlink:href="#107324"/>
      <node xlink:href="#105924"/>
      <node xlink:href="#107323"/>
      <node xlink:href="#105730"/>
      <node xlink:href="#107322"/>
      <node xlink:href="#105916"/>
      <node id="108008" label="DAD1"/>
      <node xlink:href="#105852"/>
      <node xlink:href="#105915"/>
      <node id="108007" label="CHPF2"/>
      <node xlink:href="#107327"/>
      <node id="108006" label="MAFK"/>
      <node xlink:href="#105927"/>
      <node xlink:href="#105809"/>
      <node xlink:href="#105833"/>
      <node xlink:href="#106875"/>
      <node xlink:href="#107318"/>
      <node id="108005" label="SLC17A5"/>
      <node id="108004" label="B3GNT7"/>
      <node id="108003" label="GCNT3"/>
      <node id="108002" label="NANS"/>
      <node xlink:href="#105751"/>
      <node xlink:href="#106859"/>
      <node id="108001" label="SLC35A1"/>
      <node id="108000" label="GALNT3"/>
      <node xlink:href="#106000"/>
      <node xlink:href="#107352"/>
      <node xlink:href="#105920"/>
      <node id="107999" label="B3GNT6"/>
      <node xlink:href="#105707"/>
      <node xlink:href="#105695"/>
      <node xlink:href="#107297"/>
      <node xlink:href="#105820"/>
      <node xlink:href="#105691"/>
      <node xlink:href="#107317"/>
      <node xlink:href="#107315"/>
      <node id="107998" label="ST3GAL4"/>
      <node xlink:href="#105907"/>
      <node xlink:href="#105905"/>
      <node xlink:href="#105904"/>
      <node xlink:href="#105874"/>
      <node xlink:href="#105713"/>
      <node id="107997" label="KDM4C"/>
      <node xlink:href="#107313"/>
      <node xlink:href="#105798"/>
      <node xlink:href="#105894"/>
      <node xlink:href="#106854"/>
      <node xlink:href="#105922"/>
      <node xlink:href="#105892"/>
      <node xlink:href="#107311"/>
      <node xlink:href="#105694"/>
      <node xlink:href="#105746"/>
      <node xlink:href="#106861"/>
      <node xlink:href="#105766"/>
      <node xlink:href="#105888"/>
      <node xlink:href="#105759"/>
      <node xlink:href="#106872"/>
      <node xlink:href="#105887"/>
      <node xlink:href="#105717"/>
      <node xlink:href="#105885"/>
      <node xlink:href="#105879"/>
      <node id="107996" label="HS6ST1"/>
      <node xlink:href="#106855"/>
      <node xlink:href="#105918"/>
      <node id="107995" label="HNF4A"/>
      <node id="107994" label="HNF1B"/>
      <node id="107993" label="HEYL"/>
      <node xlink:href="#107305"/>
      <node xlink:href="#107304"/>
      <node xlink:href="#106891"/>
      <node xlink:href="#105873"/>
      <node xlink:href="#105872"/>
      <node xlink:href="#105871"/>
      <node xlink:href="#107332"/>
      <node xlink:href="#105976"/>
      <node xlink:href="#105869"/>
      <node id="107992" label="ALG14"/>
      <node xlink:href="#105868"/>
      <node xlink:href="#105719"/>
      <node xlink:href="#106883"/>
      <node id="107991" label="GLI1"/>
      <node xlink:href="#105863"/>
      <node xlink:href="#106864"/>
      <node xlink:href="#106863"/>
      <node xlink:href="#106835"/>
      <node xlink:href="#105861"/>
      <node id="107990" label="B4GALNT1"/>
      <node xlink:href="#105765"/>
      <node xlink:href="#105857"/>
      <node id="107989" label="ST6GALNAC5"/>
      <node xlink:href="#106853"/>
      <node xlink:href="#106857"/>
      <node xlink:href="#105840"/>
      <node xlink:href="#105858"/>
      <node xlink:href="#105979"/>
      <node xlink:href="#105824"/>
      <node xlink:href="#105856"/>
      <node id="107988" label="FOXD2"/>
      <node xlink:href="#105855"/>
      <node xlink:href="#105850"/>
      <node xlink:href="#107295"/>
      <node xlink:href="#105830"/>
      <node xlink:href="#105829"/>
      <node xlink:href="#107300"/>
      <node xlink:href="#107281"/>
      <node xlink:href="#105823"/>
      <node xlink:href="#105822"/>
      <node xlink:href="#105821"/>
      <node xlink:href="#105878"/>
      <node xlink:href="#107286"/>
      <node xlink:href="#107285"/>
      <node xlink:href="#106893"/>
      <node xlink:href="#105711"/>
      <node xlink:href="#105803"/>
      <node xlink:href="#105801"/>
      <node xlink:href="#106892"/>
      <node id="107987" label="E2F4"/>
      <node id="107986" label="SLC35C2"/>
      <node xlink:href="#105758"/>
      <node xlink:href="#105797"/>
      <node xlink:href="#105796"/>
      <node xlink:href="#106868"/>
      <node id="107985" label="DICER1"/>
      <node xlink:href="#105688"/>
      <node xlink:href="#106850"/>
      <node xlink:href="#105851"/>
      <node xlink:href="#105794"/>
      <node xlink:href="#105793"/>
      <node xlink:href="#105807"/>
      <node xlink:href="#105790"/>
      <node xlink:href="#105783"/>
      <node xlink:href="#105754"/>
      <node xlink:href="#105781"/>
      <node xlink:href="#105780"/>
      <node xlink:href="#106849"/>
      <node xlink:href="#105768"/>
      <node xlink:href="#105776"/>
      <node xlink:href="#105775"/>
      <node xlink:href="#105773"/>
      <node xlink:href="#105772"/>
      <node xlink:href="#105770"/>
      <node xlink:href="#105769"/>
      <node id="107984" label="CTSA"/>
      <node xlink:href="#105767"/>
      <node id="107983" label="B3GNT8"/>
      <node xlink:href="#105764"/>
      <node xlink:href="#106005"/>
      <node id="107982" label="CDX2"/>
      <node id="107981" label="LAMP1"/>
      <node xlink:href="#105692"/>
      <node xlink:href="#105966"/>
      <node xlink:href="#105756"/>
      <node xlink:href="#105689"/>
      <node xlink:href="#105998"/>
      <node xlink:href="#106848"/>
      <node xlink:href="#105744"/>
      <node xlink:href="#105752"/>
      <node id="107980" label="PIGX"/>
      <node xlink:href="#105741"/>
      <node xlink:href="#106012"/>
      <node xlink:href="#105739"/>
      <node xlink:href="#105841"/>
      <node xlink:href="#106845"/>
      <node id="107979" label="SLC35F2"/>
      <node xlink:href="#105800"/>
      <node id="107978" label="C17orf96"/>
      <node id="107977" label="BRD7"/>
      <node xlink:href="#106844"/>
      <node xlink:href="#106843"/>
      <node xlink:href="#105748"/>
      <node xlink:href="#105734"/>
      <node xlink:href="#105733"/>
      <node xlink:href="#105729"/>
      <node xlink:href="#105728"/>
      <node xlink:href="#105811"/>
      <node xlink:href="#105708"/>
      <node xlink:href="#105779"/>
      <node xlink:href="#105718"/>
      <node xlink:href="#105834"/>
      <node xlink:href="#105724"/>
      <node xlink:href="#105859"/>
      <node xlink:href="#105723"/>
      <node id="107976" label="FUT8"/>
      <node id="107975" label="BARX2"/>
      <node xlink:href="#105687"/>
      <node xlink:href="#105714"/>
      <node id="107974" label="GALNT11"/>
      <node id="107973" label="AUTS2"/>
      <node xlink:href="#105712"/>
      <node xlink:href="#105923"/>
      <node id="107972" label="ATF7"/>
      <node xlink:href="#105838"/>
      <node xlink:href="#105715"/>
      <node xlink:href="#105884"/>
      <node xlink:href="#105893"/>
      <node xlink:href="#105705"/>
      <node xlink:href="#105690"/>
      <node xlink:href="#105704"/>
      <node xlink:href="#105702"/>
      <node xlink:href="#105701"/>
      <node id="107971" label="NEU1"/>
      <node xlink:href="#106846"/>
      <node xlink:href="#106837"/>
      <node xlink:href="#107279"/>
      <node xlink:href="#105799"/>
      <node xlink:href="#105792"/>
      <node xlink:href="#105854"/>
      <node id="107970" label="ARID3A"/>
      <node xlink:href="#105700"/>
      <node xlink:href="#105699"/>
      <node xlink:href="#105985"/>
      <node xlink:href="#106836"/>
      <edge id="108537" label="ZBTB33 (interacts with) SLC35B4" source="106031" target="105845" cy:directed="1"/>
      <edge id="108536" label="ZBTB33 (interacts with) GLA" source="106031" target="108026" cy:directed="1"/>
      <edge id="108535" label="ZBTB33 (interacts with) PIGA" source="106031" target="108027" cy:directed="1"/>
      <edge id="108534" label="ZBTB33 (interacts with) OGT" source="106031" target="105771" cy:directed="1"/>
      <edge id="108533" label="ZBTB33 (interacts with) C1GALT1C1" source="106031" target="106032" cy:directed="1"/>
      <edge id="108532" label="ZBTB2 (interacts with) POFUT1" source="108039" target="105792" cy:directed="1"/>
      <edge id="108531" label="YY1 (interacts with) PIGH" source="106028" target="105852" cy:directed="1"/>
      <edge id="108530" label="YY1 (interacts with) GNPNAT1" source="106028" target="105855" cy:directed="1"/>
      <edge id="108529" label="YY1 (interacts with) MGAT2" source="106028" target="106868" cy:directed="1"/>
      <edge id="108528" label="YAP1 (interacts with) LAMP2" source="106026" target="107350" cy:directed="1"/>
      <edge id="108527" label="XBP1 (interacts with) UAP1" source="108037" target="105820" cy:directed="1"/>
      <edge id="108526" label="XBP1 (interacts with) GMPPB" source="108037" target="108038" cy:directed="1"/>
      <edge id="108525" label="WDR5 (interacts with) FKTN" source="106024" target="105713" cy:directed="1"/>
      <edge id="108524" label="WDR5 (interacts with) DPM2" source="106024" target="105758" cy:directed="1"/>
      <edge id="108523" label="TTF2 (interacts with) ALG6" source="106019" target="106879" cy:directed="1"/>
      <edge id="108522" label="TTF2 (interacts with) NEU3" source="106019" target="105689" cy:directed="1"/>
      <edge id="108521" label="TTF2 (interacts with) MAN1A2" source="106019" target="105687" cy:directed="1"/>
      <edge id="108520" label="TRIM28 (interacts with) FKRP" source="106018" target="105896" cy:directed="1"/>
      <edge id="108519" label="THAP11 (interacts with) COG4" source="106890" target="106892" cy:directed="1"/>
      <edge id="108518" label="THAP11 (interacts with) COG8" source="106890" target="106891" cy:directed="1"/>
      <edge id="108517" label="TFDP1 (interacts with) DPM1" source="108036" target="105799" cy:directed="1"/>
      <edge id="108516" label="TEAD4 (interacts with) KHK" source="108035" target="105800" cy:directed="1"/>
      <edge id="108515" label="TEAD1 (interacts with) NDST1" source="106013" target="105923" cy:directed="1"/>
      <edge id="108514" label="TEAD1 (interacts with) CSGALNACT2" source="106013" target="105715" cy:directed="1"/>
      <edge id="108513" label="TDRD3 (interacts with) ALG5" source="106011" target="106012" cy:directed="1"/>
      <edge id="108512" label="TDRD3 (interacts with) COG6" source="106011" target="105824" cy:directed="1"/>
      <edge id="108511" label="TCF7L2 (interacts with) B3GALT5" source="106010" target="108034" cy:directed="1"/>
      <edge id="108510" label="TCF7L2 (interacts with) B3GNT5" source="106010" target="105707" cy:directed="1"/>
      <edge id="108509" label="TCF7 (interacts with) NEU1" source="106008" target="107971" cy:directed="1"/>
      <edge id="108508" label="TCF7 (interacts with) LAMP1" source="106008" target="107981" cy:directed="1"/>
      <edge id="108507" label="TCF7 (interacts with) RPN2" source="106008" target="105854" cy:directed="1"/>
      <edge id="108506" label="TCF7 (interacts with) DPM1" source="106008" target="105799" cy:directed="1"/>
      <edge id="108505" label="TCF7 (interacts with) POFUT1" source="106008" target="105792" cy:directed="1"/>
      <edge id="108504" label="TCF21 (interacts with) MGAT5B" source="108031" target="108014" cy:directed="1"/>
      <edge id="108503" label="TCF21 (interacts with) ST3GAL6" source="108031" target="105811" cy:directed="1"/>
      <edge id="108502" label="TCF21 (interacts with) CHST11" source="108031" target="105718" cy:directed="1"/>
      <edge id="108501" label="TCF21 (interacts with) HS3ST3B1" source="108031" target="105841" cy:directed="1"/>
      <edge id="108500" label="TCF21 (interacts with) HS3ST3A1" source="108031" target="108033" cy:directed="1"/>
      <edge id="108499" label="TCF21 (interacts with) SULF1" source="108031" target="106883" cy:directed="1"/>
      <edge id="108498" label="TCF21 (interacts with) DSEL" source="108031" target="105857" cy:directed="1"/>
      <edge id="108497" label="TCF21 (interacts with) DSE" source="108031" target="105779" cy:directed="1"/>
      <edge id="108496" label="TCF21 (interacts with) A4GALT" source="108031" target="105768" cy:directed="1"/>
      <edge id="108495" label="TCF21 (interacts with) CSGALNACT2" source="108031" target="105715" cy:directed="1"/>
      <edge id="108494" label="TCF21 (interacts with) B3GNT9" source="108031" target="108032" cy:directed="1"/>
      <edge id="108493" label="TCF21 (interacts with) NDST1" source="108031" target="105923" cy:directed="1"/>
      <edge id="108492" label="TCF21 (interacts with) TPST1" source="108031" target="105809" cy:directed="1"/>
      <edge id="108491" label="TCF21 (interacts with) CHST3" source="108031" target="105807" cy:directed="1"/>
      <edge id="108490" label="TCF21 (interacts with) GFPT2" source="108031" target="105719" cy:directed="1"/>
      <edge id="108489" label="TCF21 (interacts with) MAN1C1" source="108031" target="106853" cy:directed="1"/>
      <edge id="108488" label="TCF21 (interacts with) MFNG" source="108031" target="105766" cy:directed="1"/>
      <edge id="108487" label="TCF12 (interacts with) RTF1" source="106007" target="105700" cy:directed="1"/>
      <edge id="108486" label="TBP (interacts with) DPM1" source="108030" target="105799" cy:directed="1"/>
      <edge id="108485" label="TAF3 (interacts with) FUT11" source="107351" target="105690" cy:directed="1"/>
      <edge id="108484" label="TAF1 (interacts with) IDS" source="106006" target="105922" cy:directed="1"/>
      <edge id="108483" label="TAF1 (interacts with) LAMP2" source="106006" target="107350" cy:directed="1"/>
      <edge id="108482" label="TAF1 (interacts with) ALG13" source="106006" target="105864" cy:directed="1"/>
      <edge id="108481" label="TAF1 (interacts with) OGT" source="106006" target="105771" cy:directed="1"/>
      <edge id="108480" label="TAF1 (interacts with) MAN1A2" source="106006" target="105687" cy:directed="1"/>
      <edge id="108479" label="TAF1 (interacts with) NEU3" source="106006" target="105689" cy:directed="1"/>
      <edge id="108478" label="SVIL (interacts with) MGAT5B" source="107349" target="108014" cy:directed="1"/>
      <edge id="108477" label="SUMO2 (interacts with) SLC35B1" source="106004" target="105798" cy:directed="1"/>
      <edge id="108476" label="STAT5B (interacts with) B4GALT5" source="108029" target="107279" cy:directed="1"/>
      <edge id="108475" label="STAT5B (interacts with) POFUT1" source="108029" target="105792" cy:directed="1"/>
      <edge id="108474" label="STAT5B (interacts with) ST6GAL1" source="108029" target="106855" cy:directed="1"/>
      <edge id="108473" label="STAT5B (interacts with) SLC35B4" source="108029" target="105845" cy:directed="1"/>
      <edge id="108472" label="STAT5B (interacts with) COG1" source="108029" target="106005" cy:directed="1"/>
      <edge id="108471" label="STAT3 (interacts with) CHST2" source="107347" target="105838" cy:directed="1"/>
      <edge id="108470" label="STAT3 (interacts with) GNS" source="107347" target="105905" cy:directed="1"/>
      <edge id="108469" label="STAT3 (interacts with) FUT11" source="107347" target="105690" cy:directed="1"/>
      <edge id="108468" label="STAT3 (interacts with) MAN2A1" source="107347" target="105694" cy:directed="1"/>
      <edge id="108467" label="STAT3 (interacts with) UGCG" source="107347" target="105985" cy:directed="1"/>
      <edge id="108466" label="STAT1 (interacts with) ST8SIA1" source="105999" target="105840" cy:directed="1"/>
      <edge id="108465" label="STAT1 (interacts with) HS3ST3B1" source="105999" target="105841" cy:directed="1"/>
      <edge id="108464" label="STAT1 (interacts with) MFNG" source="105999" target="105766" cy:directed="1"/>
      <edge id="108463" label="STAT1 (interacts with) CHST11" source="105999" target="105718" cy:directed="1"/>
      <edge id="108462" label="STAT1 (interacts with) CSGALNACT2" source="105999" target="105715" cy:directed="1"/>
      <edge id="108461" label="STAT1 (interacts with) NPL" source="105999" target="105860" cy:directed="1"/>
      <edge id="108460" label="STAT1 (interacts with) GM2A" source="105999" target="105883" cy:directed="1"/>
      <edge id="108459" label="STAT1 (interacts with) ST8SIA4" source="105999" target="105834" cy:directed="1"/>
      <edge id="108458" label="STAT1 (interacts with) LIPA" source="105999" target="105884" cy:directed="1"/>
      <edge id="108457" label="STAT1 (interacts with) HK3" source="105999" target="105859" cy:directed="1"/>
      <edge id="108456" label="STAT1 (interacts with) LAMP3" source="105999" target="105776" cy:directed="1"/>
      <edge id="108455" label="SREBF2 (interacts with) ALG12" source="105995" target="105734" cy:directed="1"/>
      <edge id="108454" label="SRC (interacts with) HS6ST1" source="108028" target="107996" cy:directed="1"/>
      <edge id="108453" label="SRC (interacts with) DPM1" source="108028" target="105799" cy:directed="1"/>
      <edge id="108452" label="SRC (interacts with) CTSA" source="108028" target="107984" cy:directed="1"/>
      <edge id="108451" label="SRC (interacts with) POFUT1" source="108028" target="105792" cy:directed="1"/>
      <edge id="108450" label="SRC (interacts with) SLC35C2" source="108028" target="107986" cy:directed="1"/>
      <edge id="108449" label="SPDEF (interacts with) GNPNAT1" source="105993" target="105855" cy:directed="1"/>
      <edge id="108448" label="SPDEF (interacts with) GNE" source="105993" target="107297" cy:directed="1"/>
      <edge id="108447" label="SPDEF (interacts with) B4GALNT2" source="105993" target="107352" cy:directed="1"/>
      <edge id="108446" label="SPDEF (interacts with) ST6GALNAC6" source="105993" target="105746" cy:directed="1"/>
      <edge id="108445" label="SPDEF (interacts with) FUT8" source="105993" target="107976" cy:directed="1"/>
      <edge id="108444" label="SPDEF (interacts with) GALNT7" source="105993" target="106859" cy:directed="1"/>
      <edge id="108443" label="SPDEF (interacts with) SLC35A1" source="105993" target="108001" cy:directed="1"/>
      <edge id="108442" label="SMC1A (interacts with) PIGA" source="105989" target="108027" cy:directed="1"/>
      <edge id="108441" label="SMC1A (interacts with) UGGT1" source="105989" target="105705" cy:directed="1"/>
      <edge id="108440" label="SMC1A (interacts with) NEU3" source="105989" target="105689" cy:directed="1"/>
      <edge id="108439" label="SMARCC1 (interacts with) NEU3" source="107344" target="105689" cy:directed="1"/>
      <edge id="108438" label="SMARCC1 (interacts with) B4GALT5" source="107344" target="107279" cy:directed="1"/>
      <edge id="108437" label="SMAD1 (interacts with) GALNT7" source="107341" target="106859" cy:directed="1"/>
      <edge id="108436" label="SMAD1 (interacts with) MAN1A2" source="107341" target="105687" cy:directed="1"/>
      <edge id="108435" label="SETDB1 (interacts with) IDUA" source="107339" target="105749" cy:directed="1"/>
      <edge id="108434" label="SETDB1 (interacts with) FAM20B" source="107339" target="105731" cy:directed="1"/>
      <edge id="108433" label="SETDB1 (interacts with) PIGM" source="107339" target="105954" cy:directed="1"/>
      <edge id="108432" label="SCML2 (interacts with) GLA" source="108025" target="108026" cy:directed="1"/>
      <edge id="108431" label="SCML2 (interacts with) RPN2" source="108025" target="105854" cy:directed="1"/>
      <edge id="108430" label="SCML2 (interacts with) LAMP2" source="108025" target="107350" cy:directed="1"/>
      <edge id="108429" label="SCML2 (interacts with) DPM1" source="108025" target="105799" cy:directed="1"/>
      <edge id="108428" label="SCML2 (interacts with) SLC35B4" source="108025" target="105845" cy:directed="1"/>
      <edge id="108427" label="SCML2 (interacts with) PIGW" source="108025" target="105729" cy:directed="1"/>
      <edge id="108426" label="RYBP (interacts with) B3GNT5" source="107338" target="105707" cy:directed="1"/>
      <edge id="108425" label="RUNX3 (interacts with) CHST11" source="105982" target="105718" cy:directed="1"/>
      <edge id="108424" label="RUNX2 (interacts with) CHST3" source="105981" target="105807" cy:directed="1"/>
      <edge id="108423" label="RUNX2 (interacts with) TPST1" source="105981" target="105809" cy:directed="1"/>
      <edge id="108422" label="RUNX2 (interacts with) MAN1C1" source="105981" target="106853" cy:directed="1"/>
      <edge id="108421" label="RUNX2 (interacts with) CHST15" source="105981" target="106861" cy:directed="1"/>
      <edge id="108420" label="RUNX1 (interacts with) MGAT5" source="105978" target="105893" cy:directed="1"/>
      <edge id="108419" label="RUNX1 (interacts with) CSGALNACT1" source="105978" target="105805" cy:directed="1"/>
      <edge id="108418" label="RUNX1 (interacts with) CHST11" source="105978" target="105718" cy:directed="1"/>
      <edge id="108417" label="RUNX1 (interacts with) CHST3" source="105978" target="105807" cy:directed="1"/>
      <edge id="108416" label="RUNX1 (interacts with) SULF1" source="105978" target="106883" cy:directed="1"/>
      <edge id="108415" label="RUNX1 (interacts with) CSGALNACT2" source="105978" target="105715" cy:directed="1"/>
      <edge id="108414" label="RUNX1 (interacts with) CHSY1" source="105978" target="105717" cy:directed="1"/>
      <edge id="108413" label="RUNX1 (interacts with) CHST15" source="105978" target="106861" cy:directed="1"/>
      <edge id="108412" label="RNF2 (interacts with) FAM20B" source="105975" target="105731" cy:directed="1"/>
      <edge id="108411" label="RFX7 (interacts with) PIGB" source="105974" target="108020" cy:directed="1"/>
      <edge id="108410" label="RFX7 (interacts with) NEU3" source="105974" target="105689" cy:directed="1"/>
      <edge id="108409" label="REST (interacts with) FUT11" source="105970" target="105690" cy:directed="1"/>
      <edge id="108408" label="RELA (interacts with) GANAB" source="108024" target="105998" cy:directed="1"/>
      <edge id="108407" label="RCOR1 (interacts with) GCNT3" source="105969" target="108003" cy:directed="1"/>
      <edge id="108406" label="RCOR1 (interacts with) POMT2" source="105969" target="108023" cy:directed="1"/>
      <edge id="108405" label="RCOR1 (interacts with) MGAT2" source="105969" target="106868" cy:directed="1"/>
      <edge id="108404" label="RCOR1 (interacts with) GNPNAT1" source="105969" target="105855" cy:directed="1"/>
      <edge id="108403" label="RBL2 (interacts with) SLC35B3" source="105968" target="107281" cy:directed="1"/>
      <edge id="108402" label="RBL2 (interacts with) COG6" source="105968" target="105824" cy:directed="1"/>
      <edge id="108401" label="RBL2 (interacts with) SLC35A5" source="105968" target="105702" cy:directed="1"/>
      <edge id="108400" label="RBL1 (interacts with) UGGT2" source="108022" target="105966" cy:directed="1"/>
      <edge id="108399" label="RBL1 (interacts with) DPM1" source="108022" target="105799" cy:directed="1"/>
      <edge id="108398" label="RBBP5 (interacts with) MAN2A1" source="105967" target="105694" cy:directed="1"/>
      <edge id="108397" label="RBBP5 (interacts with) STT3B" source="105967" target="105688" cy:directed="1"/>
      <edge id="108396" label="RBBP5 (interacts with) NEU3" source="105967" target="105689" cy:directed="1"/>
      <edge id="108395" label="RBBP5 (interacts with) UGGT1" source="105967" target="105705" cy:directed="1"/>
      <edge id="108394" label="RBBP5 (interacts with) FAM20B" source="105967" target="105731" cy:directed="1"/>
      <edge id="108393" label="RBBP5 (interacts with) MAN1A2" source="105967" target="105687" cy:directed="1"/>
      <edge id="108392" label="RB1 (interacts with) LAMP1" source="105965" target="107981" cy:directed="1"/>
      <edge id="108391" label="RB1 (interacts with) ALG5" source="105965" target="106012" cy:directed="1"/>
      <edge id="108390" label="RB1 (interacts with) UGGT2" source="105965" target="105966" cy:directed="1"/>
      <edge id="108389" label="RB1 (interacts with) COG3" source="105965" target="105823" cy:directed="1"/>
      <edge id="108388" label="RB1 (interacts with) COG6" source="105965" target="105824" cy:directed="1"/>
      <edge id="108387" label="PRDM4 (interacts with) MGAT5" source="108021" target="105893" cy:directed="1"/>
      <edge id="108386" label="PRDM1 (interacts with) MAN2A1" source="105962" target="105694" cy:directed="1"/>
      <edge id="108385" label="PRDM1 (interacts with) B4GALT1" source="105962" target="107274" cy:directed="1"/>
      <edge id="108384" label="PRDM1 (interacts with) NDST1" source="105962" target="105923" cy:directed="1"/>
      <edge id="108383" label="PRDM1 (interacts with) A4GALT" source="105962" target="105768" cy:directed="1"/>
      <edge id="108382" label="PRDM1 (interacts with) MFNG" source="105962" target="105766" cy:directed="1"/>
      <edge id="108381" label="PRDM1 (interacts with) ST6GALNAC5" source="105962" target="107989" cy:directed="1"/>
      <edge id="108380" label="PRDM1 (interacts with) CHSY1" source="105962" target="105717" cy:directed="1"/>
      <edge id="108379" label="PRDM1 (interacts with) GFPT2" source="105962" target="105719" cy:directed="1"/>
      <edge id="108378" label="PRDM1 (interacts with) UGCG" source="105962" target="105985" cy:directed="1"/>
      <edge id="108377" label="PRDM1 (interacts with) ST8SIA4" source="105962" target="105834" cy:directed="1"/>
      <edge id="108376" label="PRDM1 (interacts with) HK3" source="105962" target="105859" cy:directed="1"/>
      <edge id="108375" label="PRDM1 (interacts with) CSGALNACT2" source="105962" target="105715" cy:directed="1"/>
      <edge id="108374" label="POLR3A (interacts with) SLC35E1" source="105960" target="106844" cy:directed="1"/>
      <edge id="108373" label="POLR3A (interacts with) MAN1A2" source="105960" target="105687" cy:directed="1"/>
      <edge id="108372" label="POLR3A (interacts with) MAN2A1" source="105960" target="105694" cy:directed="1"/>
      <edge id="108371" label="POLR3A (interacts with) NEU3" source="105960" target="105689" cy:directed="1"/>
      <edge id="108370" label="POLR3A (interacts with) MGAT5" source="105960" target="105893" cy:directed="1"/>
      <edge id="108369" label="POLR2B (interacts with) MAN1A2" source="105959" target="105687" cy:directed="1"/>
      <edge id="108368" label="PIAS1 (interacts with) PIGB" source="105958" target="108020" cy:directed="1"/>
      <edge id="108367" label="PIAS1 (interacts with) CHSY1" source="105958" target="105717" cy:directed="1"/>
      <edge id="108366" label="PIAS1 (interacts with) FUT11" source="105958" target="105690" cy:directed="1"/>
      <edge id="108365" label="PIAS1 (interacts with) UGCG" source="105958" target="105985" cy:directed="1"/>
      <edge id="108364" label="PHF8 (interacts with) C1GALT1C1" source="107334" target="106032" cy:directed="1"/>
      <edge id="108363" label="PHF8 (interacts with) IDS" source="107334" target="105922" cy:directed="1"/>
      <edge id="108362" label="PHF8 (interacts with) LAMP2" source="107334" target="107350" cy:directed="1"/>
      <edge id="108361" label="PHF8 (interacts with) UGGT2" source="107334" target="105966" cy:directed="1"/>
      <edge id="108360" label="PHF8 (interacts with) POFUT1" source="107334" target="105792" cy:directed="1"/>
      <edge id="108359" label="PHF8 (interacts with) SLC35A2" source="107334" target="107335" cy:directed="1"/>
      <edge id="108358" label="PHF20 (interacts with) POFUT1" source="105956" target="105792" cy:directed="1"/>
      <edge id="108357" label="PDX1 (interacts with) COG3" source="108019" target="105823" cy:directed="1"/>
      <edge id="108356" label="NR2F2 (interacts with) SULF1" source="108017" target="106883" cy:directed="1"/>
      <edge id="108355" label="NR2F2 (interacts with) TPST1" source="108017" target="105809" cy:directed="1"/>
      <edge id="108354" label="NR2F2 (interacts with) ST8SIA1" source="108017" target="105840" cy:directed="1"/>
      <edge id="108353" label="NR2F2 (interacts with) CHST3" source="108017" target="105807" cy:directed="1"/>
      <edge id="108352" label="NR2F2 (interacts with) MAN1C1" source="108017" target="106853" cy:directed="1"/>
      <edge id="108351" label="NR2F2 (interacts with) CHST14" source="108017" target="108018" cy:directed="1"/>
      <edge id="108350" label="NR2F2 (interacts with) RTF1" source="108017" target="105700" cy:directed="1"/>
      <edge id="108349" label="NR2F2 (interacts with) CHSY1" source="108017" target="105717" cy:directed="1"/>
      <edge id="108348" label="NR2F2 (interacts with) ARSB" source="108017" target="105843" cy:directed="1"/>
      <edge id="108347" label="NR2F2 (interacts with) DSEL" source="108017" target="105857" cy:directed="1"/>
      <edge id="108346" label="NR2F2 (interacts with) CSGALNACT2" source="108017" target="105715" cy:directed="1"/>
      <edge id="108345" label="NR2C2 (interacts with) NDST1" source="105949" target="105923" cy:directed="1"/>
      <edge id="108344" label="NR2C2 (interacts with) UGGT1" source="105949" target="105705" cy:directed="1"/>
      <edge id="108343" label="NR2C2 (interacts with) OGT" source="105949" target="105771" cy:directed="1"/>
      <edge id="108342" label="NR2C2 (interacts with) STT3B" source="105949" target="105688" cy:directed="1"/>
      <edge id="108341" label="NPAT (interacts with) GANAB" source="105948" target="105998" cy:directed="1"/>
      <edge id="108340" label="NOTCH1 (interacts with) NEU3" source="108016" target="105689" cy:directed="1"/>
      <edge id="108339" label="NOTCH1 (interacts with) POFUT1" source="108016" target="105792" cy:directed="1"/>
      <edge id="108338" label="NOTCH1 (interacts with) UGGT1" source="108016" target="105705" cy:directed="1"/>
      <edge id="108337" label="NIPBL (interacts with) XYLT1" source="105947" target="106854" cy:directed="1"/>
      <edge id="108336" label="NIPBL (interacts with) MGAT5" source="105947" target="105893" cy:directed="1"/>
      <edge id="108335" label="NFYA (interacts with) PIGM" source="107329" target="105954" cy:directed="1"/>
      <edge id="108334" label="NCOR2 (interacts with) B4GALNT3" source="107326" target="108015" cy:directed="1"/>
      <edge id="108333" label="NCOR2 (interacts with) XYLT1" source="107326" target="106854" cy:directed="1"/>
      <edge id="108332" label="NCOR2 (interacts with) MGAT5" source="107326" target="105893" cy:directed="1"/>
      <edge id="108331" label="NCOR2 (interacts with) NDST1" source="107326" target="105923" cy:directed="1"/>
      <edge id="108330" label="MZF1 (interacts with) FKRP" source="105942" target="105896" cy:directed="1"/>
      <edge id="108329" label="MYH11 (interacts with) EXTL1" source="105937" target="106887" cy:directed="1"/>
      <edge id="108328" label="MYH11 (interacts with) MGAT5B" source="105937" target="108014" cy:directed="1"/>
      <edge id="108327" label="MYH11 (interacts with) ST3GAL6" source="105937" target="105811" cy:directed="1"/>
      <edge id="108326" label="MYH11 (interacts with) NDST1" source="105937" target="105923" cy:directed="1"/>
      <edge id="108325" label="MYH11 (interacts with) CHST10" source="105937" target="108013" cy:directed="1"/>
      <edge id="108324" label="MYH11 (interacts with) ST8SIA3" source="105937" target="108012" cy:directed="1"/>
      <edge id="108323" label="MYH11 (interacts with) SLC35F1" source="105937" target="105927" cy:directed="1"/>
      <edge id="108322" label="MYH11 (interacts with) DSEL" source="105937" target="105857" cy:directed="1"/>
      <edge id="108321" label="MYH11 (interacts with) CHST8" source="105937" target="108011" cy:directed="1"/>
      <edge id="108320" label="MYH11 (interacts with) A4GALT" source="105937" target="105768" cy:directed="1"/>
      <edge id="108319" label="MYH11 (interacts with) CHST15" source="105937" target="106861" cy:directed="1"/>
      <edge id="108318" label="MYH11 (interacts with) ST6GALNAC5" source="105937" target="107989" cy:directed="1"/>
      <edge id="108317" label="MYH11 (interacts with) ST8SIA1" source="105937" target="105840" cy:directed="1"/>
      <edge id="108316" label="MYH11 (interacts with) CHST1" source="105937" target="108010" cy:directed="1"/>
      <edge id="108315" label="MYH11 (interacts with) XYLT1" source="105937" target="106854" cy:directed="1"/>
      <edge id="108314" label="MYH11 (interacts with) CHSY3" source="105937" target="105833" cy:directed="1"/>
      <edge id="108313" label="MYH11 (interacts with) GFPT2" source="105937" target="105719" cy:directed="1"/>
      <edge id="108312" label="MYH11 (interacts with) CHST3" source="105937" target="105807" cy:directed="1"/>
      <edge id="108311" label="MYH11 (interacts with) B4GALNT1" source="105937" target="107990" cy:directed="1"/>
      <edge id="108310" label="MYH11 (interacts with) SULF1" source="105937" target="106883" cy:directed="1"/>
      <edge id="108309" label="MYC (interacts with) POFUT1" source="108009" target="105792" cy:directed="1"/>
      <edge id="108308" label="MYC (interacts with) KHK" source="108009" target="105800" cy:directed="1"/>
      <edge id="108307" label="MYBL2 (interacts with) POFUT1" source="105935" target="105792" cy:directed="1"/>
      <edge id="108306" label="MYBL2 (interacts with) DPM1" source="105935" target="105799" cy:directed="1"/>
      <edge id="108305" label="MYBL2 (interacts with) ALG3" source="105935" target="105797" cy:directed="1"/>
      <edge id="108304" label="MYBL2 (interacts with) RPN2" source="105935" target="105854" cy:directed="1"/>
      <edge id="108303" label="MXD3 (interacts with) DPM2" source="105933" target="105758" cy:directed="1"/>
      <edge id="108302" label="MXD3 (interacts with) NANS" source="105933" target="108002" cy:directed="1"/>
      <edge id="108301" label="MRE11A (interacts with) DPM1" source="105931" target="105799" cy:directed="1"/>
      <edge id="108300" label="MRE11A (interacts with) NEU3" source="105931" target="105689" cy:directed="1"/>
      <edge id="108299" label="MEIS3 (interacts with) ST8SIA1" source="106878" target="105840" cy:directed="1"/>
      <edge id="108298" label="MED12 (interacts with) POFUT1" source="107324" target="105792" cy:directed="1"/>
      <edge id="108297" label="MED12 (interacts with) NDST1" source="107324" target="105923" cy:directed="1"/>
      <edge id="108296" label="MED12 (interacts with) NEU3" source="107324" target="105689" cy:directed="1"/>
      <edge id="108295" label="MED1 (interacts with) GANAB" source="105924" target="105998" cy:directed="1"/>
      <edge id="108294" label="MBD3 (interacts with) PIGQ" source="107323" target="105759" cy:directed="1"/>
      <edge id="108293" label="MBD2 (interacts with) PIGN" source="107322" target="105730" cy:directed="1"/>
      <edge id="108292" label="MAZ (interacts with) ALG3" source="105916" target="105797" cy:directed="1"/>
      <edge id="108291" label="MAX (interacts with) DAD1" source="105915" target="108008" cy:directed="1"/>
      <edge id="108290" label="MAX (interacts with) MGAT2" source="105915" target="106868" cy:directed="1"/>
      <edge id="108289" label="MAX (interacts with) PIGH" source="105915" target="105852" cy:directed="1"/>
      <edge id="108288" label="MAFK (interacts with) CHPF2" source="108006" target="108007" cy:directed="1"/>
      <edge id="108287" label="MAFK (interacts with) POFUT2" source="108006" target="107327" cy:directed="1"/>
      <edge id="108286" label="LEF1 (interacts with) A4GALT" source="106875" target="105768" cy:directed="1"/>
      <edge id="108285" label="LEF1 (interacts with) SLC35F1" source="106875" target="105927" cy:directed="1"/>
      <edge id="108284" label="LEF1 (interacts with) TPST1" source="106875" target="105809" cy:directed="1"/>
      <edge id="108283" label="LEF1 (interacts with) DSEL" source="106875" target="105857" cy:directed="1"/>
      <edge id="108282" label="LEF1 (interacts with) ST6GALNAC5" source="106875" target="107989" cy:directed="1"/>
      <edge id="108281" label="LEF1 (interacts with) CHSY3" source="106875" target="105833" cy:directed="1"/>
      <edge id="108280" label="LEF1 (interacts with) ST8SIA1" source="106875" target="105840" cy:directed="1"/>
      <edge id="108279" label="LEF1 (interacts with) CHST11" source="106875" target="105718" cy:directed="1"/>
      <edge id="108278" label="LEF1 (interacts with) SULF1" source="106875" target="106883" cy:directed="1"/>
      <edge id="108277" label="KLF5 (interacts with) COG6" source="107318" target="105824" cy:directed="1"/>
      <edge id="108276" label="KLF4 (interacts with) SLC17A5" source="107317" target="108005" cy:directed="1"/>
      <edge id="108275" label="KLF4 (interacts with) B3GNT7" source="107317" target="108004" cy:directed="1"/>
      <edge id="108274" label="KLF4 (interacts with) GCNT3" source="107317" target="108003" cy:directed="1"/>
      <edge id="108273" label="KLF4 (interacts with) ST6GALNAC6" source="107317" target="105746" cy:directed="1"/>
      <edge id="108272" label="KLF4 (interacts with) NANS" source="107317" target="108002" cy:directed="1"/>
      <edge id="108271" label="KLF4 (interacts with) HYAL1" source="107317" target="105751" cy:directed="1"/>
      <edge id="108270" label="KLF4 (interacts with) GALNT7" source="107317" target="106859" cy:directed="1"/>
      <edge id="108269" label="KLF4 (interacts with) ST3GAL4" source="107317" target="107998" cy:directed="1"/>
      <edge id="108268" label="KLF4 (interacts with) SLC35A1" source="107317" target="108001" cy:directed="1"/>
      <edge id="108267" label="KLF4 (interacts with) GALNT3" source="107317" target="108000" cy:directed="1"/>
      <edge id="108266" label="KLF4 (interacts with) HPSE" source="107317" target="106000" cy:directed="1"/>
      <edge id="108265" label="KLF4 (interacts with) B4GALNT2" source="107317" target="107352" cy:directed="1"/>
      <edge id="108264" label="KLF4 (interacts with) ST6GALNAC1" source="107317" target="105920" cy:directed="1"/>
      <edge id="108263" label="KLF4 (interacts with) B3GNT6" source="107317" target="107999" cy:directed="1"/>
      <edge id="108262" label="KLF4 (interacts with) B3GNT5" source="107317" target="105707" cy:directed="1"/>
      <edge id="108261" label="KLF4 (interacts with) SLC35A3" source="107317" target="105695" cy:directed="1"/>
      <edge id="108260" label="KLF4 (interacts with) GNE" source="107317" target="107297" cy:directed="1"/>
      <edge id="108259" label="KLF4 (interacts with) UAP1" source="107317" target="105820" cy:directed="1"/>
      <edge id="108258" label="KLF4 (interacts with) ACER2" source="107317" target="105691" cy:directed="1"/>
      <edge id="108257" label="KDM6B (interacts with) HS3ST3B1" source="107315" target="105841" cy:directed="1"/>
      <edge id="108256" label="KDM5B (interacts with) ST3GAL4" source="105907" target="107998" cy:directed="1"/>
      <edge id="108255" label="KDM5A (interacts with) GNS" source="105904" target="105905" cy:directed="1"/>
      <edge id="108254" label="KDM5A (interacts with) NEU3" source="105904" target="105689" cy:directed="1"/>
      <edge id="108253" label="KDM4C (interacts with) PIGO" source="107997" target="105874" cy:directed="1"/>
      <edge id="108252" label="KDM4C (interacts with) FKTN" source="107997" target="105713" cy:directed="1"/>
      <edge id="108251" label="KDM2B (interacts with) NEU3" source="107313" target="105689" cy:directed="1"/>
      <edge id="108250" label="JMJD6 (interacts with) SLC35B1" source="105894" target="105798" cy:directed="1"/>
      <edge id="108249" label="JMJD1C (interacts with) XYLT1" source="105892" target="106854" cy:directed="1"/>
      <edge id="108248" label="JMJD1C (interacts with) IDS" source="105892" target="105922" cy:directed="1"/>
      <edge id="108247" label="JMJD1C (interacts with) NDST2" source="105892" target="105772" cy:directed="1"/>
      <edge id="108246" label="JMJD1C (interacts with) CSGALNACT2" source="105892" target="105715" cy:directed="1"/>
      <edge id="108245" label="JARID2 (interacts with) POFUT1" source="107311" target="105792" cy:directed="1"/>
      <edge id="108244" label="IRF4 (interacts with) MAN2A1" source="105888" target="105694" cy:directed="1"/>
      <edge id="108243" label="IRF4 (interacts with) ST6GALNAC6" source="105888" target="105746" cy:directed="1"/>
      <edge id="108242" label="IRF4 (interacts with) MGAT1" source="105888" target="105724" cy:directed="1"/>
      <edge id="108241" label="IRF4 (interacts with) NDST1" source="105888" target="105923" cy:directed="1"/>
      <edge id="108240" label="IRF4 (interacts with) CHST15" source="105888" target="106861" cy:directed="1"/>
      <edge id="108239" label="IRF4 (interacts with) HS3ST3B1" source="105888" target="105841" cy:directed="1"/>
      <edge id="108238" label="IRF4 (interacts with) UGCG" source="105888" target="105985" cy:directed="1"/>
      <edge id="108237" label="IRF4 (interacts with) NAGK" source="105888" target="105765" cy:directed="1"/>
      <edge id="108236" label="IRF4 (interacts with) HK3" source="105888" target="105859" cy:directed="1"/>
      <edge id="108235" label="IRF4 (interacts with) LIPA" source="105888" target="105884" cy:directed="1"/>
      <edge id="108234" label="IRF4 (interacts with) CHST11" source="105888" target="105718" cy:directed="1"/>
      <edge id="108233" label="IRF4 (interacts with) ST3GAL5" source="105888" target="106857" cy:directed="1"/>
      <edge id="108232" label="IRF4 (interacts with) ST8SIA1" source="105888" target="105840" cy:directed="1"/>
      <edge id="108231" label="IRF4 (interacts with) ST8SIA4" source="105888" target="105834" cy:directed="1"/>
      <edge id="108230" label="IRF4 (interacts with) MFNG" source="105888" target="105766" cy:directed="1"/>
      <edge id="108229" label="IRF3 (interacts with) PIGQ" source="106872" target="105759" cy:directed="1"/>
      <edge id="108228" label="IRF1 (interacts with) CHST2" source="105887" target="105838" cy:directed="1"/>
      <edge id="108227" label="IRF1 (interacts with) ST8SIA4" source="105887" target="105834" cy:directed="1"/>
      <edge id="108226" label="IRF1 (interacts with) LAMP3" source="105887" target="105776" cy:directed="1"/>
      <edge id="108225" label="IRF1 (interacts with) HK3" source="105887" target="105859" cy:directed="1"/>
      <edge id="108224" label="INO80 (interacts with) CHSY1" source="105885" target="105717" cy:directed="1"/>
      <edge id="108223" label="INO80 (interacts with) RTF1" source="105885" target="105700" cy:directed="1"/>
      <edge id="108222" label="HSF1 (interacts with) RFNG" source="105879" target="105744" cy:directed="1"/>
      <edge id="108221" label="HNF4A (interacts with) HS6ST1" source="107995" target="107996" cy:directed="1"/>
      <edge id="108220" label="HNF4A (interacts with) COG3" source="107995" target="105823" cy:directed="1"/>
      <edge id="108219" label="HNF4A (interacts with) NEU1" source="107995" target="107971" cy:directed="1"/>
      <edge id="108218" label="HNF4A (interacts with) ST6GAL1" source="107995" target="106855" cy:directed="1"/>
      <edge id="108217" label="HNF4A (interacts with) LAMP1" source="107995" target="107981" cy:directed="1"/>
      <edge id="108216" label="HNF4A (interacts with) CTSA" source="107995" target="107984" cy:directed="1"/>
      <edge id="108215" label="HNF4A (interacts with) DPM1" source="107995" target="105799" cy:directed="1"/>
      <edge id="108214" label="HNF4A (interacts with) MGAT4B" source="107995" target="105918" cy:directed="1"/>
      <edge id="108213" label="HNF4A (interacts with) SLC35C2" source="107995" target="107986" cy:directed="1"/>
      <edge id="108212" label="HNF4A (interacts with) NEU3" source="107995" target="105689" cy:directed="1"/>
      <edge id="108211" label="HNF4A (interacts with) B4GALT5" source="107995" target="107279" cy:directed="1"/>
      <edge id="108210" label="HNF4A (interacts with) POFUT1" source="107995" target="105792" cy:directed="1"/>
      <edge id="108209" label="HNF1B (interacts with) COG1" source="107994" target="106005" cy:directed="1"/>
      <edge id="108208" label="HEYL (interacts with) B4GALNT1" source="107993" target="107990" cy:directed="1"/>
      <edge id="108207" label="HDAC3 (interacts with) GNPDA1" source="107304" target="107305" cy:directed="1"/>
      <edge id="108206" label="HCFC1 (interacts with) NDST1" source="105873" target="105923" cy:directed="1"/>
      <edge id="108205" label="HCFC1 (interacts with) SLC35E1" source="105873" target="106844" cy:directed="1"/>
      <edge id="108204" label="HCFC1 (interacts with) COG8" source="105873" target="106891" cy:directed="1"/>
      <edge id="108203" label="HCFC1 (interacts with) GANAB" source="105873" target="105998" cy:directed="1"/>
      <edge id="108202" label="HCFC1 (interacts with) UGGT1" source="105873" target="105705" cy:directed="1"/>
      <edge id="108201" label="HCFC1 (interacts with) NEU3" source="105873" target="105689" cy:directed="1"/>
      <edge id="108200" label="H2AFX (interacts with) B3GAT3" source="105872" target="105754" cy:directed="1"/>
      <edge id="108199" label="H2AFX (interacts with) DPM2" source="105872" target="105758" cy:directed="1"/>
      <edge id="108198" label="GTF2I (interacts with) COG5" source="105871" target="105692" cy:directed="1"/>
      <edge id="108197" label="GTF2B (interacts with) PIGY" source="105868" target="107332" cy:directed="1"/>
      <edge id="108196" label="GTF2B (interacts with) FPGT" source="105868" target="105976" cy:directed="1"/>
      <edge id="108195" label="GTF2B (interacts with) CTBS" source="105868" target="105869" cy:directed="1"/>
      <edge id="108194" label="GTF2B (interacts with) ALG14" source="105868" target="107992" cy:directed="1"/>
      <edge id="108193" label="GLI1 (interacts with) CHST3" source="107991" target="105807" cy:directed="1"/>
      <edge id="108192" label="GLI1 (interacts with) GFPT2" source="107991" target="105719" cy:directed="1"/>
      <edge id="108191" label="GLI1 (interacts with) SULF1" source="107991" target="106883" cy:directed="1"/>
      <edge id="108190" label="GATAD1 (interacts with) SLC35C2" source="105863" target="107986" cy:directed="1"/>
      <edge id="108189" label="GATAD1 (interacts with) POFUT1" source="105863" target="105792" cy:directed="1"/>
      <edge id="108188" label="GAPDH (interacts with) GPI" source="106863" target="106864" cy:directed="1"/>
      <edge id="108187" label="GABPA (interacts with) PIGK" source="105861" target="106835" cy:directed="1"/>
      <edge id="108186" label="GABPA (interacts with) SLC35A5" source="105861" target="105702" cy:directed="1"/>
      <edge id="108185" label="FOXP3 (interacts with) B4GALNT1" source="105858" target="107990" cy:directed="1"/>
      <edge id="108184" label="FOXP3 (interacts with) UGCG" source="105858" target="105985" cy:directed="1"/>
      <edge id="108183" label="FOXP3 (interacts with) FUT11" source="105858" target="105690" cy:directed="1"/>
      <edge id="108182" label="FOXP3 (interacts with) ST3GAL6" source="105858" target="105811" cy:directed="1"/>
      <edge id="108181" label="FOXP3 (interacts with) NAGK" source="105858" target="105765" cy:directed="1"/>
      <edge id="108180" label="FOXP3 (interacts with) DSEL" source="105858" target="105857" cy:directed="1"/>
      <edge id="108179" label="FOXP3 (interacts with) ST6GALNAC5" source="105858" target="107989" cy:directed="1"/>
      <edge id="108178" label="FOXP3 (interacts with) MAN1C1" source="105858" target="106853" cy:directed="1"/>
      <edge id="108177" label="FOXP3 (interacts with) ST3GAL5" source="105858" target="106857" cy:directed="1"/>
      <edge id="108176" label="FOXP3 (interacts with) CSGALNACT2" source="105858" target="105715" cy:directed="1"/>
      <edge id="108175" label="FOXP3 (interacts with) ST8SIA1" source="105858" target="105840" cy:directed="1"/>
      <edge id="108174" label="FOXP3 (interacts with) LIPA" source="105858" target="105884" cy:directed="1"/>
      <edge id="108173" label="FOXP3 (interacts with) CHST11" source="105858" target="105718" cy:directed="1"/>
      <edge id="108172" label="FOXP3 (interacts with) HK3" source="105858" target="105859" cy:directed="1"/>
      <edge id="108171" label="FOXP3 (interacts with) ST8SIA4" source="105858" target="105834" cy:directed="1"/>
      <edge id="108170" label="FOXO1 (interacts with) SULF2" source="105856" target="105979" cy:directed="1"/>
      <edge id="108169" label="FOXO1 (interacts with) COG6" source="105856" target="105824" cy:directed="1"/>
      <edge id="108168" label="FOXD2 (interacts with) CTSA" source="107988" target="107984" cy:directed="1"/>
      <edge id="108167" label="FOXA1 (interacts with) FUT8" source="105850" target="107976" cy:directed="1"/>
      <edge id="108166" label="FOXA1 (interacts with) GNPNAT1" source="105850" target="105855" cy:directed="1"/>
      <edge id="108165" label="FOSL2 (interacts with) HS3ST3B1" source="107295" target="105841" cy:directed="1"/>
      <edge id="108164" label="FOSL2 (interacts with) NDST1" source="107295" target="105923" cy:directed="1"/>
      <edge id="108163" label="FOSL2 (interacts with) FUT11" source="107295" target="105690" cy:directed="1"/>
      <edge id="108162" label="FOSL2 (interacts with) UGCG" source="107295" target="105985" cy:directed="1"/>
      <edge id="108161" label="ERCC6 (interacts with) NDST2" source="105830" target="105772" cy:directed="1"/>
      <edge id="108160" label="ERCC6 (interacts with) MAN1A2" source="105830" target="105687" cy:directed="1"/>
      <edge id="108159" label="EP400 (interacts with) NDST1" source="105829" target="105923" cy:directed="1"/>
      <edge id="108158" label="EP400 (interacts with) MAN2A2" source="105829" target="105748" cy:directed="1"/>
      <edge id="108157" label="ELF1 (interacts with) DPM1" source="105822" target="105799" cy:directed="1"/>
      <edge id="108156" label="ELF1 (interacts with) POFUT1" source="105822" target="105792" cy:directed="1"/>
      <edge id="108155" label="ELF1 (interacts with) COG5" source="105822" target="105692" cy:directed="1"/>
      <edge id="108154" label="ELF1 (interacts with) ALG5" source="105822" target="106012" cy:directed="1"/>
      <edge id="108153" label="ELF1 (interacts with) ALG11" source="105822" target="107300" cy:directed="1"/>
      <edge id="108152" label="ELF1 (interacts with) SLC35B3" source="105822" target="107281" cy:directed="1"/>
      <edge id="108151" label="ELF1 (interacts with) COG3" source="105822" target="105823" cy:directed="1"/>
      <edge id="108150" label="EHMT2 (interacts with) COG4" source="105821" target="106892" cy:directed="1"/>
      <edge id="108149" label="EED (interacts with) STT3A" source="107285" target="106893" cy:directed="1"/>
      <edge id="108148" label="EED (interacts with) DPAGT1" source="107285" target="105878" cy:directed="1"/>
      <edge id="108147" label="EED (interacts with) ALG8" source="107285" target="107286" cy:directed="1"/>
      <edge id="108146" label="E2F7 (interacts with) STT3A" source="105803" target="106893" cy:directed="1"/>
      <edge id="108145" label="E2F7 (interacts with) ALG10" source="105803" target="105711" cy:directed="1"/>
      <edge id="108144" label="E2F6 (interacts with) DPM1" source="105801" target="105799" cy:directed="1"/>
      <edge id="108143" label="E2F4 (interacts with) DPM1" source="107987" target="105799" cy:directed="1"/>
      <edge id="108142" label="E2F4 (interacts with) ALG3" source="107987" target="105797" cy:directed="1"/>
      <edge id="108141" label="E2F4 (interacts with) COG4" source="107987" target="106892" cy:directed="1"/>
      <edge id="108140" label="E2F1 (interacts with) POFUT1" source="105796" target="105792" cy:directed="1"/>
      <edge id="108139" label="E2F1 (interacts with) RPN2" source="105796" target="105854" cy:directed="1"/>
      <edge id="108138" label="E2F1 (interacts with) SLC35C2" source="105796" target="107986" cy:directed="1"/>
      <edge id="108137" label="E2F1 (interacts with) DPM2" source="105796" target="105758" cy:directed="1"/>
      <edge id="108136" label="E2F1 (interacts with) DPM1" source="105796" target="105799" cy:directed="1"/>
      <edge id="108135" label="E2F1 (interacts with) ALG3" source="105796" target="105797" cy:directed="1"/>
      <edge id="108134" label="E2F1 (interacts with) PIGW" source="105796" target="105729" cy:directed="1"/>
      <edge id="108133" label="DICER1 (interacts with) MGAT2" source="107985" target="106868" cy:directed="1"/>
      <edge id="108132" label="DCP1A (interacts with) STT3B" source="106850" target="105688" cy:directed="1"/>
      <edge id="108131" label="CTNNB1 (interacts with) GLCE" source="105794" target="105851" cy:directed="1"/>
      <edge id="108130" label="CTNNB1 (interacts with) B4GALT5" source="105794" target="107279" cy:directed="1"/>
      <edge id="108129" label="CTNNB1 (interacts with) MGAT5" source="105794" target="105893" cy:directed="1"/>
      <edge id="108128" label="CTBP1 (interacts with) B3GAT3" source="105793" target="105754" cy:directed="1"/>
      <edge id="108127" label="CREBBP (interacts with) NDST1" source="105790" target="105923" cy:directed="1"/>
      <edge id="108126" label="CREBBP (interacts with) CHST3" source="105790" target="105807" cy:directed="1"/>
      <edge id="108125" label="CREBBP (interacts with) SLC35E1" source="105790" target="106844" cy:directed="1"/>
      <edge id="108124" label="CREBBP (interacts with) MAN1A2" source="105790" target="105687" cy:directed="1"/>
      <edge id="108123" label="CPSF3L (interacts with) POMGNT1" source="105780" target="105783" cy:directed="1"/>
      <edge id="108122" label="CPSF3L (interacts with) B3GAT3" source="105780" target="105754" cy:directed="1"/>
      <edge id="108121" label="CPSF3L (interacts with) RFNG" source="105780" target="105744" cy:directed="1"/>
      <edge id="108120" label="CPSF3L (interacts with) B3GALT6" source="105780" target="105781" cy:directed="1"/>
      <edge id="108119" label="CLOCK (interacts with) FUT11" source="106849" target="105690" cy:directed="1"/>
      <edge id="108118" label="CIITA (interacts with) A4GALT" source="105775" target="105768" cy:directed="1"/>
      <edge id="108117" label="CIITA (interacts with) LAMP3" source="105775" target="105776" cy:directed="1"/>
      <edge id="108116" label="CHD4 (interacts with) UGGT1" source="105773" target="105705" cy:directed="1"/>
      <edge id="108115" label="CHD4 (interacts with) GANAB" source="105773" target="105998" cy:directed="1"/>
      <edge id="108114" label="CHD4 (interacts with) NEU3" source="105773" target="105689" cy:directed="1"/>
      <edge id="108113" label="CHD2 (interacts with) NDST1" source="105770" target="105923" cy:directed="1"/>
      <edge id="108112" label="CHD2 (interacts with) RTF1" source="105770" target="105700" cy:directed="1"/>
      <edge id="108111" label="CHD2 (interacts with) MAN2A2" source="105770" target="105748" cy:directed="1"/>
      <edge id="108110" label="CHD2 (interacts with) NDST2" source="105770" target="105772" cy:directed="1"/>
      <edge id="108109" label="CHD1 (interacts with) UGGT1" source="105769" target="105705" cy:directed="1"/>
      <edge id="108108" label="CEBPB (interacts with) RPN2" source="105767" target="105854" cy:directed="1"/>
      <edge id="108107" label="CEBPB (interacts with) POFUT1" source="105767" target="105792" cy:directed="1"/>
      <edge id="108106" label="CEBPB (interacts with) DPM1" source="105767" target="105799" cy:directed="1"/>
      <edge id="108105" label="CEBPB (interacts with) NEU1" source="105767" target="107971" cy:directed="1"/>
      <edge id="108104" label="CEBPB (interacts with) CTSA" source="105767" target="107984" cy:directed="1"/>
      <edge id="108103" label="CEBPA (interacts with) POFUT1" source="105764" target="105792" cy:directed="1"/>
      <edge id="108102" label="CEBPA (interacts with) DPM1" source="105764" target="105799" cy:directed="1"/>
      <edge id="108101" label="CEBPA (interacts with) B3GNT8" source="105764" target="107983" cy:directed="1"/>
      <edge id="108100" label="CDX2 (interacts with) COG1" source="107982" target="106005" cy:directed="1"/>
      <edge id="108099" label="CDX2 (interacts with) NEU1" source="107982" target="107971" cy:directed="1"/>
      <edge id="108098" label="CDX2 (interacts with) DPM1" source="107982" target="105799" cy:directed="1"/>
      <edge id="108097" label="CDX2 (interacts with) POFUT1" source="107982" target="105792" cy:directed="1"/>
      <edge id="108096" label="CDK8 (interacts with) LAMP1" source="105756" target="107981" cy:directed="1"/>
      <edge id="108095" label="CDK8 (interacts with) RPN2" source="105756" target="105854" cy:directed="1"/>
      <edge id="108094" label="CDK8 (interacts with) DPM1" source="105756" target="105799" cy:directed="1"/>
      <edge id="108093" label="CDK8 (interacts with) ALG5" source="105756" target="106012" cy:directed="1"/>
      <edge id="108092" label="CDK8 (interacts with) POFUT1" source="105756" target="105792" cy:directed="1"/>
      <edge id="108091" label="CDK8 (interacts with) COG5" source="105756" target="105692" cy:directed="1"/>
      <edge id="108090" label="CDK8 (interacts with) UGGT2" source="105756" target="105966" cy:directed="1"/>
      <edge id="108089" label="CDK12 (interacts with) NEU3" source="106848" target="105689" cy:directed="1"/>
      <edge id="108088" label="CDK12 (interacts with) SLC35E1" source="106848" target="106844" cy:directed="1"/>
      <edge id="108087" label="CDK12 (interacts with) GANAB" source="106848" target="105998" cy:directed="1"/>
      <edge id="108086" label="CBX8 (interacts with) NEU1" source="105752" target="107971" cy:directed="1"/>
      <edge id="108085" label="CBX8 (interacts with) RFNG" source="105752" target="105744" cy:directed="1"/>
      <edge id="108084" label="CBX3 (interacts with) PIGX" source="105741" target="107980" cy:directed="1"/>
      <edge id="108083" label="CBX3 (interacts with) ALG5" source="105741" target="106012" cy:directed="1"/>
      <edge id="108082" label="CBX3 (interacts with) DPM1" source="105741" target="105799" cy:directed="1"/>
      <edge id="108081" label="CBFB (interacts with) ALG5" source="105739" target="106012" cy:directed="1"/>
      <edge id="108080" label="CBFB (interacts with) DPM1" source="105739" target="105799" cy:directed="1"/>
      <edge id="108079" label="CBFA2T3 (interacts with) HS3ST3B1" source="106845" target="105841" cy:directed="1"/>
      <edge id="108078" label="C17orf96 (interacts with) SLC35F2" source="107978" target="107979" cy:directed="1"/>
      <edge id="108077" label="C17orf96 (interacts with) KHK" source="107978" target="105800" cy:directed="1"/>
      <edge id="108076" label="C17orf96 (interacts with) PIGW" source="107978" target="105729" cy:directed="1"/>
      <edge id="108075" label="BRD7 (interacts with) DPM1" source="107977" target="105799" cy:directed="1"/>
      <edge id="108074" label="BRD4 (interacts with) SLC35E1" source="106843" target="106844" cy:directed="1"/>
      <edge id="108073" label="BRD1 (interacts with) MAN2A2" source="105733" target="105748" cy:directed="1"/>
      <edge id="108072" label="BRD1 (interacts with) ALG12" source="105733" target="105734" cy:directed="1"/>
      <edge id="108071" label="BRCA1 (interacts with) PIGW" source="105728" target="105729" cy:directed="1"/>
      <edge id="108070" label="BATF3 (interacts with) ST3GAL6" source="105723" target="105811" cy:directed="1"/>
      <edge id="108069" label="BATF3 (interacts with) CSGALNACT2" source="105723" target="105715" cy:directed="1"/>
      <edge id="108068" label="BATF3 (interacts with) HAS1" source="105723" target="105708" cy:directed="1"/>
      <edge id="108067" label="BATF3 (interacts with) DSE" source="105723" target="105779" cy:directed="1"/>
      <edge id="108066" label="BATF3 (interacts with) CHST11" source="105723" target="105718" cy:directed="1"/>
      <edge id="108065" label="BATF3 (interacts with) ST8SIA4" source="105723" target="105834" cy:directed="1"/>
      <edge id="108064" label="BATF3 (interacts with) MGAT1" source="105723" target="105724" cy:directed="1"/>
      <edge id="108063" label="BATF3 (interacts with) HK3" source="105723" target="105859" cy:directed="1"/>
      <edge id="108062" label="BARX2 (interacts with) FUT8" source="107975" target="107976" cy:directed="1"/>
      <edge id="108061" label="BACH1 (interacts with) MAN1A2" source="105714" target="105687" cy:directed="1"/>
      <edge id="108060" label="BACH1 (interacts with) UGCG" source="105714" target="105985" cy:directed="1"/>
      <edge id="108059" label="BACH1 (interacts with) CSGALNACT2" source="105714" target="105715" cy:directed="1"/>
      <edge id="108058" label="AUTS2 (interacts with) GALNT11" source="107973" target="107974" cy:directed="1"/>
      <edge id="108057" label="ATRX (interacts with) CSGALNACT2" source="105712" target="105715" cy:directed="1"/>
      <edge id="108056" label="ATF7 (interacts with) NDST1" source="107972" target="105923" cy:directed="1"/>
      <edge id="108055" label="ATF2 (interacts with) CHST2" source="105704" target="105838" cy:directed="1"/>
      <edge id="108054" label="ATF2 (interacts with) CSGALNACT2" source="105704" target="105715" cy:directed="1"/>
      <edge id="108053" label="ATF2 (interacts with) LIPA" source="105704" target="105884" cy:directed="1"/>
      <edge id="108052" label="ATF2 (interacts with) MGAT5" source="105704" target="105893" cy:directed="1"/>
      <edge id="108051" label="ATF2 (interacts with) UGCG" source="105704" target="105985" cy:directed="1"/>
      <edge id="108050" label="ATF2 (interacts with) UGGT1" source="105704" target="105705" cy:directed="1"/>
      <edge id="108049" label="ATF2 (interacts with) FUT11" source="105704" target="105690" cy:directed="1"/>
      <edge id="108048" label="ATF1 (interacts with) SLC35A5" source="105701" target="105702" cy:directed="1"/>
      <edge id="108047" label="ASCL2 (interacts with) NEU1" source="106837" target="107971" cy:directed="1"/>
      <edge id="108046" label="ASCL2 (interacts with) LFNG" source="106837" target="106846" cy:directed="1"/>
      <edge id="108045" label="ARID3A (interacts with) B4GALT5" source="107970" target="107279" cy:directed="1"/>
      <edge id="108044" label="ARID3A (interacts with) DPM1" source="107970" target="105799" cy:directed="1"/>
      <edge id="108043" label="ARID3A (interacts with) POFUT1" source="107970" target="105792" cy:directed="1"/>
      <edge id="108042" label="ARID3A (interacts with) RPN2" source="107970" target="105854" cy:directed="1"/>
      <edge id="108041" label="ARID2 (interacts with) RTF1" source="105699" target="105700" cy:directed="1"/>
      <edge id="108040" label="AHR (interacts with) UGCG" source="106836" target="105985" cy:directed="1"/>
    </graph>
  </att>
  <att>
    <graph id="108538" label="GBM" cy:registered="1">
      <node xlink:href="#108027"/>
      <node xlink:href="#106031"/>
      <node xlink:href="#106029"/>
      <node xlink:href="#106894"/>
      <node xlink:href="#105851"/>
      <node xlink:href="#106025"/>
      <node xlink:href="#105703"/>
      <node xlink:href="#106027"/>
      <node xlink:href="#105922"/>
      <node id="108630" label="WWTR1"/>
      <node xlink:href="#106024"/>
      <node xlink:href="#107291"/>
      <node xlink:href="#106023"/>
      <node xlink:href="#105920"/>
      <node xlink:href="#106022"/>
      <node xlink:href="#106021"/>
      <node xlink:href="#106020"/>
      <node id="108629" label="UBE2I"/>
      <node id="108628" label="TRRAP"/>
      <node xlink:href="#106018"/>
      <node id="108627" label="TP53"/>
      <node xlink:href="#106890"/>
      <node id="108626" label="THAP1"/>
      <node id="108625" label="TFE3"/>
      <node xlink:href="#106016"/>
      <node xlink:href="#107353"/>
      <node xlink:href="#106013"/>
      <node xlink:href="#106009"/>
      <node xlink:href="#106007"/>
      <node xlink:href="#107281"/>
      <node xlink:href="#108030"/>
      <node id="108624" label="TAL1"/>
      <node id="108623" label="TAF7"/>
      <node xlink:href="#106006"/>
      <node id="108622" label="SUPT5H"/>
      <node xlink:href="#106004"/>
      <node xlink:href="#108029"/>
      <node xlink:href="#105807"/>
      <node xlink:href="#105905"/>
      <node xlink:href="#107347"/>
      <node xlink:href="#107346"/>
      <node id="108621" label="SOX9"/>
      <node id="108620" label="SOX4"/>
      <node xlink:href="#108013"/>
      <node xlink:href="#107345"/>
      <node id="108619" label="SOX11"/>
      <node xlink:href="#105808"/>
      <node xlink:href="#106887"/>
      <node xlink:href="#105991"/>
      <node id="108618" label="SNAPC1"/>
      <node xlink:href="#105989"/>
      <node id="108617" label="SMARCB1"/>
      <node xlink:href="#107343"/>
      <node xlink:href="#106014"/>
      <node xlink:href="#105987"/>
      <node xlink:href="#107342"/>
      <node xlink:href="#107979"/>
      <node xlink:href="#105707"/>
      <node xlink:href="#107341"/>
      <node xlink:href="#106885"/>
      <node id="108616" label="SFPQ"/>
      <node id="108615" label="SFMBT1"/>
      <node xlink:href="#107339"/>
      <node xlink:href="#108025"/>
      <node id="108614" label="SATB1"/>
      <node xlink:href="#105983"/>
      <node xlink:href="#108001"/>
      <node xlink:href="#105975"/>
      <node xlink:href="#107337"/>
      <node id="108613" label="RING1"/>
      <node xlink:href="#105974"/>
      <node xlink:href="#105837"/>
      <node xlink:href="#105972"/>
      <node id="108612" label="CHST5"/>
      <node id="108611" label="RFX2"/>
      <node xlink:href="#105971"/>
      <node xlink:href="#105970"/>
      <node xlink:href="#105918"/>
      <node xlink:href="#108024"/>
      <node xlink:href="#105968"/>
      <node xlink:href="#108022"/>
      <node id="108610" label="RBCK1"/>
      <node xlink:href="#105967"/>
      <node xlink:href="#105965"/>
      <node xlink:href="#106884"/>
      <node xlink:href="#105964"/>
      <node xlink:href="#105963"/>
      <node xlink:href="#106881"/>
      <node xlink:href="#105810"/>
      <node xlink:href="#106880"/>
      <node id="108609" label="POLR3D"/>
      <node xlink:href="#105959"/>
      <node xlink:href="#105957"/>
      <node id="108608" label="PCGF2"/>
      <node xlink:href="#105955"/>
      <node xlink:href="#105953"/>
      <node xlink:href="#107980"/>
      <node id="108607" label="PAX6"/>
      <node xlink:href="#107333"/>
      <node id="108606" label="B3GAT2"/>
      <node xlink:href="#105951"/>
      <node xlink:href="#105949"/>
      <node xlink:href="#108016"/>
      <node xlink:href="#105818"/>
      <node xlink:href="#105697"/>
      <node xlink:href="#105945"/>
      <node id="108605" label="GALNT9"/>
      <node id="108604" label="NEUROD2"/>
      <node xlink:href="#107326"/>
      <node id="108603" label="NCOR1"/>
      <node id="108602" label="NCAPG"/>
      <node xlink:href="#105942"/>
      <node xlink:href="#105737"/>
      <node xlink:href="#105935"/>
      <node xlink:href="#105934"/>
      <node xlink:href="#105933"/>
      <node id="108601" label="MLLT1"/>
      <node xlink:href="#107350"/>
      <node xlink:href="#105929"/>
      <node xlink:href="#105938"/>
      <node xlink:href="#105926"/>
      <node xlink:href="#106877"/>
      <node xlink:href="#106859"/>
      <node id="108600" label="STS"/>
      <node xlink:href="#105925"/>
      <node xlink:href="#107324"/>
      <node xlink:href="#105921"/>
      <node id="108599" label="MBD4"/>
      <node xlink:href="#107287"/>
      <node xlink:href="#105896"/>
      <node xlink:href="#107323"/>
      <node xlink:href="#105916"/>
      <node id="108598" label="MAFF"/>
      <node xlink:href="#105860"/>
      <node xlink:href="#105914"/>
      <node xlink:href="#106876"/>
      <node xlink:href="#105815"/>
      <node xlink:href="#105912"/>
      <node xlink:href="#105911"/>
      <node xlink:href="#107296"/>
      <node xlink:href="#107321"/>
      <node xlink:href="#106846"/>
      <node id="108597" label="KLF15"/>
      <node xlink:href="#107314"/>
      <node xlink:href="#106874"/>
      <node xlink:href="#107313"/>
      <node xlink:href="#105901"/>
      <node xlink:href="#105899"/>
      <node xlink:href="#105895"/>
      <node xlink:href="#108002"/>
      <node xlink:href="#105894"/>
      <node xlink:href="#105892"/>
      <node xlink:href="#105954"/>
      <node xlink:href="#107311"/>
      <node xlink:href="#105859"/>
      <node xlink:href="#105890"/>
      <node xlink:href="#105889"/>
      <node xlink:href="#105749"/>
      <node xlink:href="#105886"/>
      <node xlink:href="#105885"/>
      <node xlink:href="#106853"/>
      <node xlink:href="#106856"/>
      <node xlink:href="#105882"/>
      <node id="108596" label="HOXA1"/>
      <node id="108595" label="HIRA"/>
      <node xlink:href="#105877"/>
      <node xlink:href="#106867"/>
      <node id="108594" label="SULT1A3"/>
      <node id="108593" label="HDAC6"/>
      <node xlink:href="#107307"/>
      <node xlink:href="#105722"/>
      <node xlink:href="#105782"/>
      <node xlink:href="#107304"/>
      <node xlink:href="#105927"/>
      <node id="108592" label="HDAC2"/>
      <node xlink:href="#105873"/>
      <node id="108591" label="HBP1"/>
      <node id="108590" label="GAL3ST3"/>
      <node xlink:href="#105872"/>
      <node xlink:href="#107302"/>
      <node xlink:href="#105871"/>
      <node xlink:href="#105870"/>
      <node xlink:href="#106032"/>
      <node xlink:href="#105820"/>
      <node xlink:href="#107971"/>
      <node xlink:href="#108008"/>
      <node xlink:href="#107992"/>
      <node xlink:href="#105868"/>
      <node id="108589" label="GMEB2"/>
      <node xlink:href="#107327"/>
      <node xlink:href="#105863"/>
      <node id="108588" label="SLC35C1"/>
      <node xlink:href="#106863"/>
      <node xlink:href="#105973"/>
      <node xlink:href="#105711"/>
      <node xlink:href="#105824"/>
      <node xlink:href="#106835"/>
      <node xlink:href="#105976"/>
      <node xlink:href="#105861"/>
      <node xlink:href="#106862"/>
      <node id="108587" label="FOXO3"/>
      <node id="108586" label="SLC35A4"/>
      <node xlink:href="#105853"/>
      <node xlink:href="#107298"/>
      <node xlink:href="#106868"/>
      <node id="108585" label="HEXB"/>
      <node id="108584" label="UGP2"/>
      <node xlink:href="#107293"/>
      <node id="108583" label="CHPF"/>
      <node xlink:href="#107294"/>
      <node xlink:href="#107310"/>
      <node xlink:href="#105897"/>
      <node xlink:href="#105778"/>
      <node xlink:href="#106861"/>
      <node xlink:href="#105766"/>
      <node xlink:href="#105848"/>
      <node xlink:href="#105847"/>
      <node id="108582" label="EZH2"/>
      <node xlink:href="#105846"/>
      <node xlink:href="#105835"/>
      <node id="108581" label="ETV4"/>
      <node xlink:href="#105842"/>
      <node xlink:href="#105855"/>
      <node xlink:href="#105878"/>
      <node id="108580" label="EXT1"/>
      <node xlink:href="#105902"/>
      <node xlink:href="#105979"/>
      <node xlink:href="#105893"/>
      <node xlink:href="#105718"/>
      <node xlink:href="#105839"/>
      <node xlink:href="#107319"/>
      <node xlink:href="#107328"/>
      <node id="108579" label="ST3GAL1"/>
      <node xlink:href="#105802"/>
      <node xlink:href="#105832"/>
      <node xlink:href="#105831"/>
      <node id="108578" label="PIGL"/>
      <node xlink:href="#107292"/>
      <node xlink:href="#106864"/>
      <node id="108577" label="EPAS1"/>
      <node xlink:href="#105829"/>
      <node xlink:href="#105826"/>
      <node xlink:href="#105816"/>
      <node id="108576" label="EBNA1BP2"/>
      <node id="108575" label="E2F8"/>
      <node id="108574" label="GUSB"/>
      <node xlink:href="#105803"/>
      <node xlink:href="#106879"/>
      <node xlink:href="#105801"/>
      <node xlink:href="#107987"/>
      <node xlink:href="#107284"/>
      <node id="108573" label="E2F2"/>
      <node id="108572" label="SLC35B2"/>
      <node xlink:href="#105797"/>
      <node xlink:href="#105796"/>
      <node id="108571" label="DR1"/>
      <node id="108570" label="DOT1L"/>
      <node xlink:href="#105843"/>
      <node xlink:href="#107299"/>
      <node xlink:href="#107300"/>
      <node xlink:href="#107282"/>
      <node xlink:href="#105795"/>
      <node xlink:href="#106850"/>
      <node id="108569" label="DAXX"/>
      <node xlink:href="#105730"/>
      <node xlink:href="#105794"/>
      <node xlink:href="#105793"/>
      <node id="108568" label="CSNK2A1"/>
      <node xlink:href="#105790"/>
      <node xlink:href="#105747"/>
      <node xlink:href="#105762"/>
      <node xlink:href="#105780"/>
      <node id="108567" label="NAGA"/>
      <node xlink:href="#105779"/>
      <node xlink:href="#105777"/>
      <node xlink:href="#105775"/>
      <node xlink:href="#105774"/>
      <node id="108566" label="B3GNT4"/>
      <node id="108565" label="CHD5"/>
      <node xlink:href="#105770"/>
      <node xlink:href="#105792"/>
      <node xlink:href="#105950"/>
      <node xlink:href="#105771"/>
      <node xlink:href="#105769"/>
      <node id="108564" label="CEBPZ"/>
      <node id="108563" label="CEBPD"/>
      <node xlink:href="#106860"/>
      <node xlink:href="#105884"/>
      <node xlink:href="#106000"/>
      <node xlink:href="#105765"/>
      <node xlink:href="#105724"/>
      <node xlink:href="#105764"/>
      <node xlink:href="#105751"/>
      <node xlink:href="#105784"/>
      <node xlink:href="#105759"/>
      <node xlink:href="#105758"/>
      <node xlink:href="#105757"/>
      <node xlink:href="#105823"/>
      <node xlink:href="#105756"/>
      <node id="108562" label="CCNT2"/>
      <node xlink:href="#105791"/>
      <node xlink:href="#106892"/>
      <node xlink:href="#105744"/>
      <node xlink:href="#105752"/>
      <node xlink:href="#107309"/>
      <node xlink:href="#105883"/>
      <node id="108561" label="GALNT6"/>
      <node id="108560" label="GAA"/>
      <node xlink:href="#106855"/>
      <node xlink:href="#105745"/>
      <node xlink:href="#106847"/>
      <node xlink:href="#105750"/>
      <node xlink:href="#105743"/>
      <node id="108559" label="GALE"/>
      <node xlink:href="#108026"/>
      <node xlink:href="#107305"/>
      <node xlink:href="#107332"/>
      <node id="108558" label="PIGC"/>
      <node xlink:href="#105789"/>
      <node id="108557" label="PIGF"/>
      <node xlink:href="#107286"/>
      <node xlink:href="#106012"/>
      <node xlink:href="#105799"/>
      <node xlink:href="#105741"/>
      <node id="108556" label="PMM2"/>
      <node id="108555" label="DDOST"/>
      <node xlink:href="#105739"/>
      <node xlink:href="#105738"/>
      <node xlink:href="#105781"/>
      <node xlink:href="#105917"/>
      <node xlink:href="#107990"/>
      <node xlink:href="#107978"/>
      <node xlink:href="#105798"/>
      <node xlink:href="#105880"/>
      <node xlink:href="#105754"/>
      <node xlink:href="#105736"/>
      <node xlink:href="#107977"/>
      <node xlink:href="#108023"/>
      <node xlink:href="#106843"/>
      <node xlink:href="#107277"/>
      <node xlink:href="#107276"/>
      <node xlink:href="#106005"/>
      <node xlink:href="#105908"/>
      <node id="108554" label="ALG9"/>
      <node xlink:href="#105845"/>
      <node xlink:href="#105727"/>
      <node xlink:href="#105729"/>
      <node xlink:href="#105728"/>
      <node xlink:href="#105864"/>
      <node xlink:href="#105726"/>
      <node xlink:href="#107275"/>
      <node xlink:href="#105806"/>
      <node xlink:href="#105725"/>
      <node xlink:href="#105936"/>
      <node xlink:href="#105723"/>
      <node xlink:href="#106854"/>
      <node xlink:href="#107297"/>
      <node xlink:href="#105857"/>
      <node id="108553" label="BACH2"/>
      <node xlink:href="#105941"/>
      <node xlink:href="#107274"/>
      <node xlink:href="#107306"/>
      <node xlink:href="#105772"/>
      <node id="108552" label="GCNT1"/>
      <node id="108551" label="UGDH"/>
      <node xlink:href="#107279"/>
      <node xlink:href="#106838"/>
      <node xlink:href="#105717"/>
      <node xlink:href="#105716"/>
      <node xlink:href="#105985"/>
      <node xlink:href="#105715"/>
      <node xlink:href="#105714"/>
      <node xlink:href="#105712"/>
      <node xlink:href="#105748"/>
      <node xlink:href="#105923"/>
      <node xlink:href="#107972"/>
      <node xlink:href="#105735"/>
      <node id="108550" label="ATF4"/>
      <node xlink:href="#105809"/>
      <node xlink:href="#105706"/>
      <node xlink:href="#105844"/>
      <node xlink:href="#106891"/>
      <node xlink:href="#106893"/>
      <node xlink:href="#105713"/>
      <node xlink:href="#105731"/>
      <node xlink:href="#105695"/>
      <node xlink:href="#105998"/>
      <node xlink:href="#105692"/>
      <node xlink:href="#107278"/>
      <node xlink:href="#105696"/>
      <node xlink:href="#105694"/>
      <node xlink:href="#105704"/>
      <node xlink:href="#105761"/>
      <node id="108549" label="ASCL1"/>
      <node xlink:href="#105700"/>
      <node id="108548" label="ARNT2"/>
      <node xlink:href="#106882"/>
      <node xlink:href="#106844"/>
      <node xlink:href="#105705"/>
      <node xlink:href="#105691"/>
      <node xlink:href="#105690"/>
      <node xlink:href="#105689"/>
      <node xlink:href="#105688"/>
      <node xlink:href="#105687"/>
      <node xlink:href="#105686"/>
      <edge id="109658" label="ZBTB33 (interacts with) SULT1C4" source="106031" target="105837" cy:directed="1"/>
      <edge id="109657" label="ZBTB33 (interacts with) SLC35B4" source="106031" target="105845" cy:directed="1"/>
      <edge id="109656" label="ZBTB33 (interacts with) RTF1" source="106031" target="105700" cy:directed="1"/>
      <edge id="109655" label="ZBTB33 (interacts with) COG2" source="106031" target="105973" cy:directed="1"/>
      <edge id="109654" label="ZBTB33 (interacts with) FUT10" source="106031" target="107278" cy:directed="1"/>
      <edge id="109653" label="ZBTB33 (interacts with) B3GALNT2" source="106031" target="105908" cy:directed="1"/>
      <edge id="109652" label="ZBTB33 (interacts with) PIGA" source="106031" target="108027" cy:directed="1"/>
      <edge id="109651" label="ZBTB33 (interacts with) PIGM" source="106031" target="105954" cy:directed="1"/>
      <edge id="109650" label="ZBTB33 (interacts with) SLC35A3" source="106031" target="105695" cy:directed="1"/>
      <edge id="109649" label="ZBTB33 (interacts with) ALG10B" source="106031" target="105727" cy:directed="1"/>
      <edge id="109648" label="ZBTB33 (interacts with) ALG10" source="106031" target="105711" cy:directed="1"/>
      <edge id="109647" label="ZBTB33 (interacts with) FKTN" source="106031" target="105713" cy:directed="1"/>
      <edge id="109646" label="ZBTB17 (interacts with) B4GALNT4" source="106029" target="105784" cy:directed="1"/>
      <edge id="109645" label="ZBTB17 (interacts with) B4GALT2" source="106029" target="105917" cy:directed="1"/>
      <edge id="109644" label="ZBTB17 (interacts with) POMT1" source="106029" target="105761" cy:directed="1"/>
      <edge id="109643" label="ZBTB17 (interacts with) MOGS" source="106029" target="105762" cy:directed="1"/>
      <edge id="109642" label="ZBTB17 (interacts with) PIGQ" source="106029" target="105759" cy:directed="1"/>
      <edge id="109641" label="ZBTB17 (interacts with) B3GALT6" source="106029" target="105781" cy:directed="1"/>
      <edge id="109640" label="ZBTB17 (interacts with) RFNG" source="106029" target="105744" cy:directed="1"/>
      <edge id="109639" label="ZBTB10 (interacts with) UGGT1" source="106894" target="105705" cy:directed="1"/>
      <edge id="109638" label="XRN2 (interacts with) FPGT" source="106025" target="105976" cy:directed="1"/>
      <edge id="109637" label="XRN2 (interacts with) ALG8" source="106025" target="107286" cy:directed="1"/>
      <edge id="109636" label="XRN2 (interacts with) DDOST" source="106025" target="108555" cy:directed="1"/>
      <edge id="109635" label="XRN2 (interacts with) B4GALT3" source="106025" target="105789" cy:directed="1"/>
      <edge id="109634" label="XRN2 (interacts with) ALG9" source="106025" target="108554" cy:directed="1"/>
      <edge id="109633" label="XRN2 (interacts with) PIGW" source="106025" target="105729" cy:directed="1"/>
      <edge id="109632" label="XRN2 (interacts with) DPAGT1" source="106025" target="105878" cy:directed="1"/>
      <edge id="109631" label="XRN2 (interacts with) STT3A" source="106025" target="106893" cy:directed="1"/>
      <edge id="109630" label="XRN2 (interacts with) GNPNAT1" source="106025" target="105855" cy:directed="1"/>
      <edge id="109629" label="XRN2 (interacts with) UGDH" source="106025" target="108551" cy:directed="1"/>
      <edge id="109628" label="XRN2 (interacts with) GLCE" source="106025" target="105851" cy:directed="1"/>
      <edge id="109627" label="XRN2 (interacts with) MGAT2" source="106025" target="106868" cy:directed="1"/>
      <edge id="109626" label="XRN2 (interacts with) DPM1" source="106025" target="105799" cy:directed="1"/>
      <edge id="109625" label="XRN2 (interacts with) EXTL2" source="106025" target="105844" cy:directed="1"/>
      <edge id="109624" label="XRN2 (interacts with) ALG10" source="106025" target="105711" cy:directed="1"/>
      <edge id="109623" label="XRN2 (interacts with) SLC35A3" source="106025" target="105695" cy:directed="1"/>
      <edge id="109622" label="XRN2 (interacts with) SLC35F5" source="106025" target="105696" cy:directed="1"/>
      <edge id="109621" label="XRN2 (interacts with) GANAB" source="106025" target="105998" cy:directed="1"/>
      <edge id="109620" label="XRN2 (interacts with) PIGN" source="106025" target="105730" cy:directed="1"/>
      <edge id="109619" label="XRN2 (interacts with) COG5" source="106025" target="105692" cy:directed="1"/>
      <edge id="109618" label="XRN2 (interacts with) STT3B" source="106025" target="105688" cy:directed="1"/>
      <edge id="109617" label="WWTR1 (interacts with) GALNT2" source="108630" target="107306" cy:directed="1"/>
      <edge id="109616" label="WWTR1 (interacts with) SLC35D1" source="108630" target="105950" cy:directed="1"/>
      <edge id="109615" label="WWTR1 (interacts with) GALNT4" source="108630" target="105703" cy:directed="1"/>
      <edge id="109614" label="WWTR1 (interacts with) GALNT5" source="108630" target="106027" cy:directed="1"/>
      <edge id="109613" label="WWTR1 (interacts with) IDS" source="108630" target="105922" cy:directed="1"/>
      <edge id="109612" label="WWTR1 (interacts with) FUT11" source="108630" target="105690" cy:directed="1"/>
      <edge id="109611" label="WWTR1 (interacts with) MAN2A1" source="108630" target="105694" cy:directed="1"/>
      <edge id="109610" label="WDR5 (interacts with) ST3GAL2" source="106024" target="105806" cy:directed="1"/>
      <edge id="109609" label="WDR5 (interacts with) GNE" source="106024" target="107297" cy:directed="1"/>
      <edge id="109608" label="WDR5 (interacts with) ALG9" source="106024" target="108554" cy:directed="1"/>
      <edge id="109607" label="WDR5 (interacts with) GANAB" source="106024" target="105998" cy:directed="1"/>
      <edge id="109606" label="WDR5 (interacts with) B3GALT6" source="106024" target="105781" cy:directed="1"/>
      <edge id="109605" label="WDR5 (interacts with) FKTN" source="106024" target="105713" cy:directed="1"/>
      <edge id="109604" label="WDR5 (interacts with) B4GALT2" source="106024" target="105917" cy:directed="1"/>
      <edge id="109603" label="WDR5 (interacts with) MOGS" source="106024" target="105762" cy:directed="1"/>
      <edge id="109602" label="WDR5 (interacts with) POMT1" source="106024" target="105761" cy:directed="1"/>
      <edge id="109601" label="WDR5 (interacts with) DPM2" source="106024" target="105758" cy:directed="1"/>
      <edge id="109600" label="VEZF1 (interacts with) PAPSS1" source="106023" target="107291" cy:directed="1"/>
      <edge id="109599" label="VEZF1 (interacts with) FKTN" source="106023" target="105713" cy:directed="1"/>
      <edge id="109598" label="VEZF1 (interacts with) ALG10" source="106023" target="105711" cy:directed="1"/>
      <edge id="109597" label="VEZF1 (interacts with) ALG10B" source="106023" target="105727" cy:directed="1"/>
      <edge id="109596" label="USF2 (interacts with) ST6GALNAC1" source="106022" target="105920" cy:directed="1"/>
      <edge id="109595" label="USF1 (interacts with) GLA" source="106021" target="108026" cy:directed="1"/>
      <edge id="109594" label="USF1 (interacts with) DPM1" source="106021" target="105799" cy:directed="1"/>
      <edge id="109593" label="USF1 (interacts with) ST3GAL3" source="106021" target="105747" cy:directed="1"/>
      <edge id="109592" label="USF1 (interacts with) PIGY" source="106021" target="107332" cy:directed="1"/>
      <edge id="109591" label="USF1 (interacts with) TSTA3" source="106021" target="105880" cy:directed="1"/>
      <edge id="109590" label="USF1 (interacts with) RFNG" source="106021" target="105744" cy:directed="1"/>
      <edge id="109589" label="USF1 (interacts with) DPM2" source="106021" target="105758" cy:directed="1"/>
      <edge id="109588" label="USF1 (interacts with) B4GALT3" source="106021" target="105789" cy:directed="1"/>
      <edge id="109587" label="USF1 (interacts with) DPM3" source="106021" target="105722" cy:directed="1"/>
      <edge id="109586" label="UBTF (interacts with) POMT1" source="106020" target="105761" cy:directed="1"/>
      <edge id="109585" label="UBTF (interacts with) B4GALNT4" source="106020" target="105784" cy:directed="1"/>
      <edge id="109584" label="UBTF (interacts with) RTF1" source="106020" target="105700" cy:directed="1"/>
      <edge id="109583" label="UBTF (interacts with) PIGQ" source="106020" target="105759" cy:directed="1"/>
      <edge id="109582" label="UBE2I (interacts with) ALG9" source="108629" target="108554" cy:directed="1"/>
      <edge id="109581" label="UBE2I (interacts with) DPM1" source="108629" target="105799" cy:directed="1"/>
      <edge id="109580" label="UBE2I (interacts with) SLC35B1" source="108629" target="105798" cy:directed="1"/>
      <edge id="109579" label="TRRAP (interacts with) ST3GAL2" source="108628" target="105806" cy:directed="1"/>
      <edge id="109578" label="TRRAP (interacts with) RTF1" source="108628" target="105700" cy:directed="1"/>
      <edge id="109577" label="TRIM28 (interacts with) ST3GAL2" source="106018" target="105806" cy:directed="1"/>
      <edge id="109576" label="TRIM28 (interacts with) SLC35B1" source="106018" target="105798" cy:directed="1"/>
      <edge id="109575" label="TRIM28 (interacts with) SLC35B2" source="106018" target="108572" cy:directed="1"/>
      <edge id="109574" label="TRIM28 (interacts with) MOGS" source="106018" target="105762" cy:directed="1"/>
      <edge id="109573" label="TRIM28 (interacts with) GANAB" source="106018" target="105998" cy:directed="1"/>
      <edge id="109572" label="TRIM28 (interacts with) B4GALT2" source="106018" target="105917" cy:directed="1"/>
      <edge id="109571" label="TRIM28 (interacts with) FKRP" source="106018" target="105896" cy:directed="1"/>
      <edge id="109570" label="TP53 (interacts with) ST3GAL2" source="108627" target="105806" cy:directed="1"/>
      <edge id="109569" label="TP53 (interacts with) GANAB" source="108627" target="105998" cy:directed="1"/>
      <edge id="109568" label="TP53 (interacts with) SLC35B2" source="108627" target="108572" cy:directed="1"/>
      <edge id="109567" label="TP53 (interacts with) PMM2" source="108627" target="108556" cy:directed="1"/>
      <edge id="109566" label="TP53 (interacts with) ALG9" source="108627" target="108554" cy:directed="1"/>
      <edge id="109565" label="TP53 (interacts with) PIGW" source="108627" target="105729" cy:directed="1"/>
      <edge id="109564" label="THAP11 (interacts with) EXTL2" source="106890" target="105844" cy:directed="1"/>
      <edge id="109563" label="THAP11 (interacts with) B4GALT2" source="106890" target="105917" cy:directed="1"/>
      <edge id="109562" label="THAP11 (interacts with) GAL3ST3" source="106890" target="108590" cy:directed="1"/>
      <edge id="109561" label="THAP11 (interacts with) DPM3" source="106890" target="105722" cy:directed="1"/>
      <edge id="109560" label="THAP11 (interacts with) COG4" source="106890" target="106892" cy:directed="1"/>
      <edge id="109559" label="THAP1 (interacts with) RPN1" source="108626" target="105936" cy:directed="1"/>
      <edge id="109558" label="THAP1 (interacts with) DPM1" source="108626" target="105799" cy:directed="1"/>
      <edge id="109557" label="TFE3 (interacts with) GBA" source="108625" target="107309" cy:directed="1"/>
      <edge id="109556" label="TET2 (interacts with) MAN1A2" source="106016" target="105687" cy:directed="1"/>
      <edge id="109555" label="TERF2 (interacts with) XYLT1" source="107353" target="106854" cy:directed="1"/>
      <edge id="109554" label="TERF2 (interacts with) ST3GAL2" source="107353" target="105806" cy:directed="1"/>
      <edge id="109553" label="TERF2 (interacts with) COG7" source="107353" target="105791" cy:directed="1"/>
      <edge id="109552" label="TERF2 (interacts with) COG4" source="107353" target="106892" cy:directed="1"/>
      <edge id="109551" label="TERF2 (interacts with) COG8" source="107353" target="106891" cy:directed="1"/>
      <edge id="109550" label="TEAD1 (interacts with) CHST10" source="106013" target="108013" cy:directed="1"/>
      <edge id="109549" label="TEAD1 (interacts with) PIGX" source="106013" target="107980" cy:directed="1"/>
      <edge id="109548" label="TEAD1 (interacts with) COG5" source="106013" target="105692" cy:directed="1"/>
      <edge id="109547" label="TEAD1 (interacts with) SLC35D1" source="106013" target="105950" cy:directed="1"/>
      <edge id="109546" label="TEAD1 (interacts with) UGGT1" source="106013" target="105705" cy:directed="1"/>
      <edge id="109545" label="TEAD1 (interacts with) NDST1" source="106013" target="105923" cy:directed="1"/>
      <edge id="109544" label="TEAD1 (interacts with) FAM20B" source="106013" target="105731" cy:directed="1"/>
      <edge id="109543" label="TCF7L1 (interacts with) POMT1" source="106009" target="105761" cy:directed="1"/>
      <edge id="109542" label="TCF12 (interacts with) B3GALT1" source="106007" target="105818" cy:directed="1"/>
      <edge id="109541" label="TCF12 (interacts with) PIGW" source="106007" target="105729" cy:directed="1"/>
      <edge id="109540" label="TCF12 (interacts with) ALG9" source="106007" target="108554" cy:directed="1"/>
      <edge id="109539" label="TCF12 (interacts with) NEU3" source="106007" target="105689" cy:directed="1"/>
      <edge id="109538" label="TCF12 (interacts with) RTF1" source="106007" target="105700" cy:directed="1"/>
      <edge id="109537" label="TBP (interacts with) SLC35B1" source="108030" target="105798" cy:directed="1"/>
      <edge id="109536" label="TBP (interacts with) PIGL" source="108030" target="108578" cy:directed="1"/>
      <edge id="109535" label="TBP (interacts with) SLC35B3" source="108030" target="107281" cy:directed="1"/>
      <edge id="109534" label="TBP (interacts with) ALG9" source="108030" target="108554" cy:directed="1"/>
      <edge id="109533" label="TBP (interacts with) OGT" source="108030" target="105771" cy:directed="1"/>
      <edge id="109532" label="TBP (interacts with) PIGW" source="108030" target="105729" cy:directed="1"/>
      <edge id="109531" label="TBP (interacts with) DPM1" source="108030" target="105799" cy:directed="1"/>
      <edge id="109530" label="TBP (interacts with) SLC35A1" source="108030" target="108001" cy:directed="1"/>
      <edge id="109529" label="TAL1 (interacts with) HPSE" source="108624" target="106000" cy:directed="1"/>
      <edge id="109528" label="TAL1 (interacts with) ST6GALNAC3" source="108624" target="105815" cy:directed="1"/>
      <edge id="109527" label="TAL1 (interacts with) ST6GAL1" source="108624" target="106855" cy:directed="1"/>
      <edge id="109526" label="TAF7 (interacts with) ALG5" source="108623" target="106012" cy:directed="1"/>
      <edge id="109525" label="TAF7 (interacts with) B4GALT3" source="108623" target="105789" cy:directed="1"/>
      <edge id="109524" label="TAF1 (interacts with) RTF1" source="106006" target="105700" cy:directed="1"/>
      <edge id="109523" label="SUPT5H (interacts with) B4GALNT4" source="108622" target="105784" cy:directed="1"/>
      <edge id="109522" label="SUPT5H (interacts with) POMT2" source="108622" target="108023" cy:directed="1"/>
      <edge id="109521" label="SUPT5H (interacts with) FUT2" source="108622" target="107287" cy:directed="1"/>
      <edge id="109520" label="SUPT5H (interacts with) POMT1" source="108622" target="105761" cy:directed="1"/>
      <edge id="109519" label="SUPT5H (interacts with) FKRP" source="108622" target="105896" cy:directed="1"/>
      <edge id="109518" label="SUMO2 (interacts with) B4GALT3" source="106004" target="105789" cy:directed="1"/>
      <edge id="109517" label="SUMO2 (interacts with) DPM1" source="106004" target="105799" cy:directed="1"/>
      <edge id="109516" label="SUMO2 (interacts with) DPM3" source="106004" target="105722" cy:directed="1"/>
      <edge id="109515" label="SUMO2 (interacts with) ALG5" source="106004" target="106012" cy:directed="1"/>
      <edge id="109514" label="SUMO2 (interacts with) PIGY" source="106004" target="107332" cy:directed="1"/>
      <edge id="109513" label="SUMO2 (interacts with) PIGC" source="106004" target="108558" cy:directed="1"/>
      <edge id="109512" label="SUMO2 (interacts with) SLC35B1" source="106004" target="105798" cy:directed="1"/>
      <edge id="109511" label="STAT5B (interacts with) UGGT1" source="108029" target="105705" cy:directed="1"/>
      <edge id="109510" label="STAT5B (interacts with) MGAT5" source="108029" target="105893" cy:directed="1"/>
      <edge id="109509" label="STAT3 (interacts with) CHST3" source="107347" target="105807" cy:directed="1"/>
      <edge id="109508" label="STAT3 (interacts with) STT3A" source="107347" target="106893" cy:directed="1"/>
      <edge id="109507" label="STAT3 (interacts with) GALNT2" source="107347" target="107306" cy:directed="1"/>
      <edge id="109506" label="STAT3 (interacts with) POFUT1" source="107347" target="105792" cy:directed="1"/>
      <edge id="109505" label="STAT3 (interacts with) CHST15" source="107347" target="106861" cy:directed="1"/>
      <edge id="109504" label="STAT3 (interacts with) GANAB" source="107347" target="105998" cy:directed="1"/>
      <edge id="109503" label="STAT3 (interacts with) HK1" source="107347" target="107293" cy:directed="1"/>
      <edge id="109502" label="STAT3 (interacts with) MAN1C1" source="107347" target="106853" cy:directed="1"/>
      <edge id="109501" label="STAT3 (interacts with) SLC35E1" source="107347" target="106844" cy:directed="1"/>
      <edge id="109500" label="STAT3 (interacts with) CHSY1" source="107347" target="105717" cy:directed="1"/>
      <edge id="109499" label="STAT3 (interacts with) B4GALT5" source="107347" target="107279" cy:directed="1"/>
      <edge id="109498" label="STAT3 (interacts with) GNS" source="107347" target="105905" cy:directed="1"/>
      <edge id="109497" label="STAT3 (interacts with) UGGT1" source="107347" target="105705" cy:directed="1"/>
      <edge id="109496" label="STAT3 (interacts with) STT3B" source="107347" target="105688" cy:directed="1"/>
      <edge id="109495" label="STAT3 (interacts with) FUT11" source="107347" target="105690" cy:directed="1"/>
      <edge id="109494" label="STAT3 (interacts with) MAN2A1" source="107347" target="105694" cy:directed="1"/>
      <edge id="109493" label="STAT3 (interacts with) UGCG" source="107347" target="105985" cy:directed="1"/>
      <edge id="109492" label="STAT3 (interacts with) MGAT5" source="107347" target="105893" cy:directed="1"/>
      <edge id="109491" label="SP2 (interacts with) RTF1" source="107346" target="105700" cy:directed="1"/>
      <edge id="109490" label="SP2 (interacts with) NDST1" source="107346" target="105923" cy:directed="1"/>
      <edge id="109489" label="SP2 (interacts with) POMT2" source="107346" target="108023" cy:directed="1"/>
      <edge id="109488" label="SP2 (interacts with) MAN2A2" source="107346" target="105748" cy:directed="1"/>
      <edge id="109487" label="SOX9 (interacts with) PIGX" source="108621" target="107980" cy:directed="1"/>
      <edge id="109486" label="SOX9 (interacts with) SLC35D1" source="108621" target="105950" cy:directed="1"/>
      <edge id="109485" label="SOX9 (interacts with) RTF1" source="108621" target="105700" cy:directed="1"/>
      <edge id="109484" label="SOX9 (interacts with) B4GALNT4" source="108621" target="105784" cy:directed="1"/>
      <edge id="109483" label="SOX9 (interacts with) POMT2" source="108621" target="108023" cy:directed="1"/>
      <edge id="109482" label="SOX9 (interacts with) COG1" source="108621" target="106005" cy:directed="1"/>
      <edge id="109481" label="SOX4 (interacts with) GNE" source="108620" target="107297" cy:directed="1"/>
      <edge id="109480" label="SOX4 (interacts with) GNB1" source="108620" target="105902" cy:directed="1"/>
      <edge id="109479" label="SOX2 (interacts with) B3GALNT2" source="107345" target="105908" cy:directed="1"/>
      <edge id="109478" label="SOX2 (interacts with) COG1" source="107345" target="106005" cy:directed="1"/>
      <edge id="109477" label="SOX2 (interacts with) RTF1" source="107345" target="105700" cy:directed="1"/>
      <edge id="109476" label="SOX2 (interacts with) POMT2" source="107345" target="108023" cy:directed="1"/>
      <edge id="109475" label="SOX2 (interacts with) POMT1" source="107345" target="105761" cy:directed="1"/>
      <edge id="109474" label="SOX2 (interacts with) PIGW" source="107345" target="105729" cy:directed="1"/>
      <edge id="109473" label="SOX2 (interacts with) CHST10" source="107345" target="108013" cy:directed="1"/>
      <edge id="109472" label="SOX11 (interacts with) GCNT2" source="108619" target="107296" cy:directed="1"/>
      <edge id="109471" label="SOX11 (interacts with) GNE" source="108619" target="107297" cy:directed="1"/>
      <edge id="109470" label="SOX10 (interacts with) ST6GAL1" source="105991" target="106855" cy:directed="1"/>
      <edge id="109469" label="SOX10 (interacts with) B3GALT2" source="105991" target="105808" cy:directed="1"/>
      <edge id="109468" label="SOX10 (interacts with) ST6GALNAC3" source="105991" target="105815" cy:directed="1"/>
      <edge id="109467" label="SOX10 (interacts with) EXTL1" source="105991" target="106887" cy:directed="1"/>
      <edge id="109466" label="SNAPC1 (interacts with) MGAT2" source="108618" target="106868" cy:directed="1"/>
      <edge id="109465" label="SMC1A (interacts with) PIGM" source="105989" target="105954" cy:directed="1"/>
      <edge id="109464" label="SMC1A (interacts with) FAM20B" source="105989" target="105731" cy:directed="1"/>
      <edge id="109463" label="SMC1A (interacts with) GANAB" source="105989" target="105998" cy:directed="1"/>
      <edge id="109462" label="SMC1A (interacts with) RTF1" source="105989" target="105700" cy:directed="1"/>
      <edge id="109461" label="SMC1A (interacts with) UGGT1" source="105989" target="105705" cy:directed="1"/>
      <edge id="109460" label="SMC1A (interacts with) MAN1A2" source="105989" target="105687" cy:directed="1"/>
      <edge id="109459" label="SMC1A (interacts with) STT3B" source="105989" target="105688" cy:directed="1"/>
      <edge id="109458" label="SMC1A (interacts with) NEU3" source="105989" target="105689" cy:directed="1"/>
      <edge id="109457" label="SMARCB1 (interacts with) GAL3ST3" source="108617" target="108590" cy:directed="1"/>
      <edge id="109456" label="SMARCB1 (interacts with) SLC35B2" source="108617" target="108572" cy:directed="1"/>
      <edge id="109455" label="SMARCB1 (interacts with) SLC35B1" source="108617" target="105798" cy:directed="1"/>
      <edge id="109454" label="SMARCA4 (interacts with) UGGT1" source="107343" target="105705" cy:directed="1"/>
      <edge id="109453" label="SMARCA4 (interacts with) B3GALT6" source="107343" target="105781" cy:directed="1"/>
      <edge id="109452" label="SMARCA4 (interacts with) B4GALNT4" source="107343" target="105784" cy:directed="1"/>
      <edge id="109451" label="SMARCA4 (interacts with) ST3GAL2" source="107343" target="105806" cy:directed="1"/>
      <edge id="109450" label="SMARCA4 (interacts with) POMT2" source="107343" target="108023" cy:directed="1"/>
      <edge id="109449" label="SMARCA4 (interacts with) MOGS" source="107343" target="105762" cy:directed="1"/>
      <edge id="109448" label="SMAD4 (interacts with) B4GALT3" source="105987" target="105789" cy:directed="1"/>
      <edge id="109447" label="SMAD4 (interacts with) ALG10" source="105987" target="105711" cy:directed="1"/>
      <edge id="109446" label="SMAD4 (interacts with) PIGW" source="105987" target="105729" cy:directed="1"/>
      <edge id="109445" label="SMAD4 (interacts with) EXTL2" source="105987" target="105844" cy:directed="1"/>
      <edge id="109444" label="SMAD4 (interacts with) GALNT1" source="105987" target="106014" cy:directed="1"/>
      <edge id="109443" label="SMAD4 (interacts with) COG5" source="105987" target="105692" cy:directed="1"/>
      <edge id="109442" label="SMAD4 (interacts with) RTF1" source="105987" target="105700" cy:directed="1"/>
      <edge id="109441" label="SMAD3 (interacts with) MAN2A2" source="107342" target="105748" cy:directed="1"/>
      <edge id="109440" label="SMAD3 (interacts with) RTF1" source="107342" target="105700" cy:directed="1"/>
      <edge id="109439" label="SMAD1 (interacts with) SLC35F2" source="107341" target="107979" cy:directed="1"/>
      <edge id="109438" label="SMAD1 (interacts with) B3GNT5" source="107341" target="105707" cy:directed="1"/>
      <edge id="109437" label="SMAD1 (interacts with) POFUT1" source="107341" target="105792" cy:directed="1"/>
      <edge id="109436" label="SMAD1 (interacts with) COG5" source="107341" target="105692" cy:directed="1"/>
      <edge id="109435" label="SMAD1 (interacts with) CHSY1" source="107341" target="105717" cy:directed="1"/>
      <edge id="109434" label="SMAD1 (interacts with) SLC35D1" source="107341" target="105950" cy:directed="1"/>
      <edge id="109433" label="SMAD1 (interacts with) STT3B" source="107341" target="105688" cy:directed="1"/>
      <edge id="109432" label="SIRT6 (interacts with) SLC35B1" source="106885" target="105798" cy:directed="1"/>
      <edge id="109431" label="SIRT6 (interacts with) B4GALT2" source="106885" target="105917" cy:directed="1"/>
      <edge id="109430" label="SIRT6 (interacts with) B4GALNT4" source="106885" target="105784" cy:directed="1"/>
      <edge id="109429" label="SIRT6 (interacts with) MOGS" source="106885" target="105762" cy:directed="1"/>
      <edge id="109428" label="SIRT6 (interacts with) B3GALT6" source="106885" target="105781" cy:directed="1"/>
      <edge id="109427" label="SIRT6 (interacts with) ALG3" source="106885" target="105797" cy:directed="1"/>
      <edge id="109426" label="SIRT6 (interacts with) TSTA3" source="106885" target="105880" cy:directed="1"/>
      <edge id="109425" label="SIRT6 (interacts with) RFNG" source="106885" target="105744" cy:directed="1"/>
      <edge id="109424" label="SIRT6 (interacts with) DPM2" source="106885" target="105758" cy:directed="1"/>
      <edge id="109423" label="SFPQ (interacts with) PIGW" source="108616" target="105729" cy:directed="1"/>
      <edge id="109422" label="SFMBT1 (interacts with) UGGT1" source="108615" target="105705" cy:directed="1"/>
      <edge id="109421" label="SFMBT1 (interacts with) GFPT1" source="108615" target="106882" cy:directed="1"/>
      <edge id="109420" label="SFMBT1 (interacts with) STT3B" source="108615" target="105688" cy:directed="1"/>
      <edge id="109419" label="SETDB1 (interacts with) B3GALNT2" source="107339" target="105908" cy:directed="1"/>
      <edge id="109418" label="SETDB1 (interacts with) GANAB" source="107339" target="105998" cy:directed="1"/>
      <edge id="109417" label="SETDB1 (interacts with) PIGW" source="107339" target="105729" cy:directed="1"/>
      <edge id="109416" label="SETDB1 (interacts with) MOGS" source="107339" target="105762" cy:directed="1"/>
      <edge id="109415" label="SETDB1 (interacts with) COG4" source="107339" target="106892" cy:directed="1"/>
      <edge id="109414" label="SCML2 (interacts with) B3GALNT2" source="108025" target="105908" cy:directed="1"/>
      <edge id="109413" label="SCML2 (interacts with) ALG9" source="108025" target="108554" cy:directed="1"/>
      <edge id="109412" label="SCML2 (interacts with) PIGW" source="108025" target="105729" cy:directed="1"/>
      <edge id="109411" label="SCML2 (interacts with) OGT" source="108025" target="105771" cy:directed="1"/>
      <edge id="109410" label="SATB1 (interacts with) MGAT5" source="108614" target="105893" cy:directed="1"/>
      <edge id="109409" label="RXRA (interacts with) NDST1" source="105983" target="105923" cy:directed="1"/>
      <edge id="109408" label="RNF2 (interacts with) PIGF" source="105975" target="108557" cy:directed="1"/>
      <edge id="109407" label="RNF2 (interacts with) ALG8" source="105975" target="107286" cy:directed="1"/>
      <edge id="109406" label="RNF2 (interacts with) SLC35B1" source="105975" target="105798" cy:directed="1"/>
      <edge id="109405" label="RNF2 (interacts with) DPM1" source="105975" target="105799" cy:directed="1"/>
      <edge id="109404" label="RNF2 (interacts with) SLC35A1" source="105975" target="108001" cy:directed="1"/>
      <edge id="109403" label="RNF2 (interacts with) PIGC" source="105975" target="108558" cy:directed="1"/>
      <edge id="109402" label="RNF2 (interacts with) GLA" source="105975" target="108026" cy:directed="1"/>
      <edge id="109401" label="RNF2 (interacts with) B4GALT3" source="105975" target="105789" cy:directed="1"/>
      <edge id="109400" label="RNF2 (interacts with) PIGW" source="105975" target="105729" cy:directed="1"/>
      <edge id="109399" label="RNF2 (interacts with) GNPNAT1" source="105975" target="105855" cy:directed="1"/>
      <edge id="109398" label="RNF2 (interacts with) SLC35A3" source="105975" target="105695" cy:directed="1"/>
      <edge id="109397" label="RLF (interacts with) RTF1" source="107337" target="105700" cy:directed="1"/>
      <edge id="109396" label="RING1 (interacts with) RFNG" source="108613" target="105744" cy:directed="1"/>
      <edge id="109395" label="RFX7 (interacts with) NEU3" source="105974" target="105689" cy:directed="1"/>
      <edge id="109394" label="RFX5 (interacts with) PIGM" source="105972" target="105954" cy:directed="1"/>
      <edge id="109393" label="RFX5 (interacts with) SULT1C4" source="105972" target="105837" cy:directed="1"/>
      <edge id="109392" label="RFX5 (interacts with) MAN1A2" source="105972" target="105687" cy:directed="1"/>
      <edge id="109391" label="RFX2 (interacts with) PIGQ" source="108611" target="105759" cy:directed="1"/>
      <edge id="109390" label="RFX2 (interacts with) PIGX" source="108611" target="107980" cy:directed="1"/>
      <edge id="109389" label="RFX2 (interacts with) LFNG" source="108611" target="106846" cy:directed="1"/>
      <edge id="109388" label="RFX2 (interacts with) CHST5" source="108611" target="108612" cy:directed="1"/>
      <edge id="109387" label="RFX1 (interacts with) POMT2" source="105971" target="108023" cy:directed="1"/>
      <edge id="109386" label="RFX1 (interacts with) SLC35E1" source="105971" target="106844" cy:directed="1"/>
      <edge id="109385" label="REST (interacts with) FUT11" source="105970" target="105690" cy:directed="1"/>
      <edge id="109384" label="RELA (interacts with) SLC35A4" source="108024" target="108586" cy:directed="1"/>
      <edge id="109383" label="RELA (interacts with) DPAGT1" source="108024" target="105878" cy:directed="1"/>
      <edge id="109382" label="RELA (interacts with) MGAT4B" source="108024" target="105918" cy:directed="1"/>
      <edge id="109381" label="RELA (interacts with) MOGS" source="108024" target="105762" cy:directed="1"/>
      <edge id="109380" label="RELA (interacts with) GANAB" source="108024" target="105998" cy:directed="1"/>
      <edge id="109379" label="RBL2 (interacts with) PIGM" source="105968" target="105954" cy:directed="1"/>
      <edge id="109378" label="RBL2 (interacts with) UGGT1" source="105968" target="105705" cy:directed="1"/>
      <edge id="109377" label="RBL2 (interacts with) MAN1A2" source="105968" target="105687" cy:directed="1"/>
      <edge id="109376" label="RBL2 (interacts with) SLC35A3" source="105968" target="105695" cy:directed="1"/>
      <edge id="109375" label="RBL2 (interacts with) ALG10B" source="105968" target="105727" cy:directed="1"/>
      <edge id="109374" label="RBL1 (interacts with) ALG9" source="108022" target="108554" cy:directed="1"/>
      <edge id="109373" label="RBCK1 (interacts with) FUT2" source="108610" target="107287" cy:directed="1"/>
      <edge id="109372" label="RBCK1 (interacts with) MOGS" source="108610" target="105762" cy:directed="1"/>
      <edge id="109371" label="RBBP5 (interacts with) EXTL2" source="105967" target="105844" cy:directed="1"/>
      <edge id="109370" label="RBBP5 (interacts with) SLC35B4" source="105967" target="105845" cy:directed="1"/>
      <edge id="109369" label="RBBP5 (interacts with) SLC35D1" source="105967" target="105950" cy:directed="1"/>
      <edge id="109368" label="RBBP5 (interacts with) STT3A" source="105967" target="106893" cy:directed="1"/>
      <edge id="109367" label="RBBP5 (interacts with) GFPT1" source="105967" target="106882" cy:directed="1"/>
      <edge id="109366" label="RBBP5 (interacts with) FKTN" source="105967" target="105713" cy:directed="1"/>
      <edge id="109365" label="RBBP5 (interacts with) PIGM" source="105967" target="105954" cy:directed="1"/>
      <edge id="109364" label="RBBP5 (interacts with) RTF1" source="105967" target="105700" cy:directed="1"/>
      <edge id="109363" label="RBBP5 (interacts with) B3GALNT2" source="105967" target="105908" cy:directed="1"/>
      <edge id="109362" label="RBBP5 (interacts with) NEU3" source="105967" target="105689" cy:directed="1"/>
      <edge id="109361" label="RBBP5 (interacts with) PIGN" source="105967" target="105730" cy:directed="1"/>
      <edge id="109360" label="RBBP5 (interacts with) SLC35A3" source="105967" target="105695" cy:directed="1"/>
      <edge id="109359" label="RBBP5 (interacts with) UGGT1" source="105967" target="105705" cy:directed="1"/>
      <edge id="109358" label="RBBP5 (interacts with) ACER2" source="105967" target="105691" cy:directed="1"/>
      <edge id="109357" label="RBBP5 (interacts with) COG5" source="105967" target="105692" cy:directed="1"/>
      <edge id="109356" label="RBBP5 (interacts with) FAM20B" source="105967" target="105731" cy:directed="1"/>
      <edge id="109355" label="RBBP5 (interacts with) MAN1A2" source="105967" target="105687" cy:directed="1"/>
      <edge id="109354" label="RB1 (interacts with) ALG5" source="105965" target="106012" cy:directed="1"/>
      <edge id="109353" label="RB1 (interacts with) COG5" source="105965" target="105692" cy:directed="1"/>
      <edge id="109352" label="RB1 (interacts with) COG3" source="105965" target="105823" cy:directed="1"/>
      <edge id="109351" label="RB1 (interacts with) COG6" source="105965" target="105824" cy:directed="1"/>
      <edge id="109350" label="RARA (interacts with) B4GALT2" source="106884" target="105917" cy:directed="1"/>
      <edge id="109349" label="RARA (interacts with) SLC35B1" source="106884" target="105798" cy:directed="1"/>
      <edge id="109348" label="RARA (interacts with) B3GALT6" source="106884" target="105781" cy:directed="1"/>
      <edge id="109347" label="RARA (interacts with) ST3GAL2" source="106884" target="105806" cy:directed="1"/>
      <edge id="109346" label="RARA (interacts with) MOGS" source="106884" target="105762" cy:directed="1"/>
      <edge id="109345" label="RAC3 (interacts with) B4GALT3" source="105964" target="105789" cy:directed="1"/>
      <edge id="109344" label="PRKDC (interacts with) ARSB" source="105963" target="105843" cy:directed="1"/>
      <edge id="109343" label="PRKDC (interacts with) STT3A" source="105963" target="106893" cy:directed="1"/>
      <edge id="109342" label="PRKDC (interacts with) NEU3" source="105963" target="105689" cy:directed="1"/>
      <edge id="109341" label="PRKDC (interacts with) COG8" source="105963" target="106891" cy:directed="1"/>
      <edge id="109340" label="PRKDC (interacts with) MGAT5" source="105963" target="105893" cy:directed="1"/>
      <edge id="109339" label="PRKDC (interacts with) PIGM" source="105963" target="105954" cy:directed="1"/>
      <edge id="109338" label="PRKDC (interacts with) NDST1" source="105963" target="105923" cy:directed="1"/>
      <edge id="109337" label="PRKDC (interacts with) GANAB" source="105963" target="105998" cy:directed="1"/>
      <edge id="109336" label="PRKDC (interacts with) RTF1" source="105963" target="105700" cy:directed="1"/>
      <edge id="109335" label="PRKDC (interacts with) ALG10" source="105963" target="105711" cy:directed="1"/>
      <edge id="109334" label="PPARA (interacts with) NDST1" source="106881" target="105923" cy:directed="1"/>
      <edge id="109333" label="POU2F2 (interacts with) FUT4" source="106880" target="105810" cy:directed="1"/>
      <edge id="109332" label="POU2F2 (interacts with) ST6GAL1" source="106880" target="106855" cy:directed="1"/>
      <edge id="109331" label="POU2F2 (interacts with) GCNT1" source="106880" target="108552" cy:directed="1"/>
      <edge id="109330" label="POU2F2 (interacts with) DSE" source="106880" target="105779" cy:directed="1"/>
      <edge id="109329" label="POU2F2 (interacts with) MAN1A1" source="106880" target="105716" cy:directed="1"/>
      <edge id="109328" label="POLR3D (interacts with) EXTL3" source="108609" target="107299" cy:directed="1"/>
      <edge id="109327" label="POLR3D (interacts with) GNPNAT1" source="108609" target="105855" cy:directed="1"/>
      <edge id="109326" label="POLR3D (interacts with) B3GALT6" source="108609" target="105781" cy:directed="1"/>
      <edge id="109325" label="POLR3D (interacts with) SLC35B1" source="108609" target="105798" cy:directed="1"/>
      <edge id="109324" label="POLR3D (interacts with) STT3A" source="108609" target="106893" cy:directed="1"/>
      <edge id="109323" label="POLR3D (interacts with) MOGS" source="108609" target="105762" cy:directed="1"/>
      <edge id="109322" label="POLR3D (interacts with) PMM2" source="108609" target="108556" cy:directed="1"/>
      <edge id="109321" label="POLR3D (interacts with) UGDH" source="108609" target="108551" cy:directed="1"/>
      <edge id="109320" label="POLR3D (interacts with) SLC35B2" source="108609" target="108572" cy:directed="1"/>
      <edge id="109319" label="POLR3D (interacts with) GANAB" source="108609" target="105998" cy:directed="1"/>
      <edge id="109318" label="POLR2B (interacts with) ALG9" source="105959" target="108554" cy:directed="1"/>
      <edge id="109317" label="POLR2B (interacts with) COG8" source="105959" target="106891" cy:directed="1"/>
      <edge id="109316" label="POLR2B (interacts with) EXTL2" source="105959" target="105844" cy:directed="1"/>
      <edge id="109315" label="POLR2B (interacts with) STT3A" source="105959" target="106893" cy:directed="1"/>
      <edge id="109314" label="POLR2B (interacts with) UGDH" source="105959" target="108551" cy:directed="1"/>
      <edge id="109313" label="POLR2B (interacts with) PIGW" source="105959" target="105729" cy:directed="1"/>
      <edge id="109312" label="POLR2B (interacts with) B3GALNT2" source="105959" target="105908" cy:directed="1"/>
      <edge id="109311" label="POLR2B (interacts with) RTF1" source="105959" target="105700" cy:directed="1"/>
      <edge id="109310" label="POLR2B (interacts with) STT3B" source="105959" target="105688" cy:directed="1"/>
      <edge id="109309" label="POLR2B (interacts with) MAN1A2" source="105959" target="105687" cy:directed="1"/>
      <edge id="109308" label="PHF6 (interacts with) FAM20B" source="105957" target="105731" cy:directed="1"/>
      <edge id="109307" label="PCGF2 (interacts with) GAL3ST3" source="108608" target="108590" cy:directed="1"/>
      <edge id="109306" label="PCGF1 (interacts with) ALG14" source="105955" target="107992" cy:directed="1"/>
      <edge id="109305" label="PCGF1 (interacts with) PIGC" source="105955" target="108558" cy:directed="1"/>
      <edge id="109304" label="PCGF1 (interacts with) TSTA3" source="105955" target="105880" cy:directed="1"/>
      <edge id="109303" label="PBX1 (interacts with) COG1" source="105953" target="106005" cy:directed="1"/>
      <edge id="109302" label="PBX1 (interacts with) MAN1A2" source="105953" target="105687" cy:directed="1"/>
      <edge id="109301" label="PAX6 (interacts with) COG1" source="108607" target="106005" cy:directed="1"/>
      <edge id="109300" label="PAX6 (interacts with) PIGX" source="108607" target="107980" cy:directed="1"/>
      <edge id="109299" label="NRF1 (interacts with) ALG9" source="107333" target="108554" cy:directed="1"/>
      <edge id="109298" label="NRF1 (interacts with) PIGL" source="107333" target="108578" cy:directed="1"/>
      <edge id="109297" label="NRF1 (interacts with) POMT2" source="107333" target="108023" cy:directed="1"/>
      <edge id="109296" label="NRF1 (interacts with) MOGS" source="107333" target="105762" cy:directed="1"/>
      <edge id="109295" label="NRF1 (interacts with) B3GALT6" source="107333" target="105781" cy:directed="1"/>
      <edge id="109294" label="NRF1 (interacts with) POMT1" source="107333" target="105761" cy:directed="1"/>
      <edge id="109293" label="NR2F1 (interacts with) B3GAT2" source="105951" target="108606" cy:directed="1"/>
      <edge id="109292" label="NR2C2 (interacts with) UGGT1" source="105949" target="105705" cy:directed="1"/>
      <edge id="109291" label="NR2C2 (interacts with) SLC35B4" source="105949" target="105845" cy:directed="1"/>
      <edge id="109290" label="NR2C2 (interacts with) SLC35A3" source="105949" target="105695" cy:directed="1"/>
      <edge id="109289" label="NR2C2 (interacts with) COG3" source="105949" target="105823" cy:directed="1"/>
      <edge id="109288" label="NR2C2 (interacts with) FAM20B" source="105949" target="105731" cy:directed="1"/>
      <edge id="109287" label="NR2C2 (interacts with) ALG10B" source="105949" target="105727" cy:directed="1"/>
      <edge id="109286" label="NR2C2 (interacts with) OGT" source="105949" target="105771" cy:directed="1"/>
      <edge id="109285" label="NR2C2 (interacts with) FKTN" source="105949" target="105713" cy:directed="1"/>
      <edge id="109284" label="NR2C2 (interacts with) STT3B" source="105949" target="105688" cy:directed="1"/>
      <edge id="109283" label="NOTCH1 (interacts with) POMT2" source="108016" target="108023" cy:directed="1"/>
      <edge id="109282" label="NOTCH1 (interacts with) POMT1" source="108016" target="105761" cy:directed="1"/>
      <edge id="109281" label="NOTCH1 (interacts with) ST3GAL2" source="108016" target="105806" cy:directed="1"/>
      <edge id="109280" label="NFIC (interacts with) GALNT2" source="105945" target="107306" cy:directed="1"/>
      <edge id="109279" label="NFIC (interacts with) STT3A" source="105945" target="106893" cy:directed="1"/>
      <edge id="109278" label="NFIC (interacts with) B3GALT1" source="105945" target="105818" cy:directed="1"/>
      <edge id="109277" label="NFIC (interacts with) CHSY1" source="105945" target="105717" cy:directed="1"/>
      <edge id="109276" label="NFIC (interacts with) COG8" source="105945" target="106891" cy:directed="1"/>
      <edge id="109275" label="NFIC (interacts with) ST3GAL2" source="105945" target="105806" cy:directed="1"/>
      <edge id="109274" label="NFIC (interacts with) UGGT1" source="105945" target="105705" cy:directed="1"/>
      <edge id="109273" label="NFIC (interacts with) STT3B" source="105945" target="105688" cy:directed="1"/>
      <edge id="109272" label="NFIC (interacts with) GANAB" source="105945" target="105998" cy:directed="1"/>
      <edge id="109271" label="NFIC (interacts with) GALNT10" source="105945" target="105697" cy:directed="1"/>
      <edge id="109270" label="NFIC (interacts with) NDST1" source="105945" target="105923" cy:directed="1"/>
      <edge id="109269" label="NFIC (interacts with) SLC35E1" source="105945" target="106844" cy:directed="1"/>
      <edge id="109268" label="NFIC (interacts with) FUT11" source="105945" target="105690" cy:directed="1"/>
      <edge id="109267" label="NFIC (interacts with) MGAT5" source="105945" target="105893" cy:directed="1"/>
      <edge id="109266" label="NEUROD2 (interacts with) GALNT9" source="108604" target="108605" cy:directed="1"/>
      <edge id="109265" label="NCOR2 (interacts with) MOGS" source="107326" target="105762" cy:directed="1"/>
      <edge id="109264" label="NCOR2 (interacts with) POMT2" source="107326" target="108023" cy:directed="1"/>
      <edge id="109263" label="NCOR2 (interacts with) UGGT1" source="107326" target="105705" cy:directed="1"/>
      <edge id="109262" label="NCOR2 (interacts with) XYLT1" source="107326" target="106854" cy:directed="1"/>
      <edge id="109261" label="NCOR2 (interacts with) NDST1" source="107326" target="105923" cy:directed="1"/>
      <edge id="109260" label="NCOR1 (interacts with) NDST1" source="108603" target="105923" cy:directed="1"/>
      <edge id="109259" label="NCAPG (interacts with) GCNT2" source="108602" target="107296" cy:directed="1"/>
      <edge id="109258" label="NCAPG (interacts with) UGDH" source="108602" target="108551" cy:directed="1"/>
      <edge id="109257" label="NCAPG (interacts with) PMM2" source="108602" target="108556" cy:directed="1"/>
      <edge id="109256" label="NCAPG (interacts with) SLC35B1" source="108602" target="105798" cy:directed="1"/>
      <edge id="109255" label="NCAPG (interacts with) B4GALT3" source="108602" target="105789" cy:directed="1"/>
      <edge id="109254" label="NCAPG (interacts with) ALG6" source="108602" target="106879" cy:directed="1"/>
      <edge id="109253" label="NCAPG (interacts with) GANAB" source="108602" target="105998" cy:directed="1"/>
      <edge id="109252" label="MZF1 (interacts with) B4GALNT4" source="105942" target="105784" cy:directed="1"/>
      <edge id="109251" label="MZF1 (interacts with) FKRP" source="105942" target="105896" cy:directed="1"/>
      <edge id="109250" label="MYBL2 (interacts with) SLC35A4" source="105935" target="108586" cy:directed="1"/>
      <edge id="109249" label="MYBL2 (interacts with) ST3GAL2" source="105935" target="105806" cy:directed="1"/>
      <edge id="109248" label="MYBL2 (interacts with) HYAL2" source="105935" target="105737" cy:directed="1"/>
      <edge id="109247" label="MYBL2 (interacts with) GCNT2" source="105935" target="107296" cy:directed="1"/>
      <edge id="109246" label="MYBL2 (interacts with) ALG9" source="105935" target="108554" cy:directed="1"/>
      <edge id="109245" label="MYBL2 (interacts with) PMM2" source="105935" target="108556" cy:directed="1"/>
      <edge id="109244" label="MYBL2 (interacts with) GNPNAT1" source="105935" target="105855" cy:directed="1"/>
      <edge id="109243" label="MYBL2 (interacts with) MOGS" source="105935" target="105762" cy:directed="1"/>
      <edge id="109242" label="MYBL2 (interacts with) GANAB" source="105935" target="105998" cy:directed="1"/>
      <edge id="109241" label="MYBL2 (interacts with) B4GALT3" source="105935" target="105789" cy:directed="1"/>
      <edge id="109240" label="MYBL2 (interacts with) SLC35B1" source="105935" target="105798" cy:directed="1"/>
      <edge id="109239" label="MYBL2 (interacts with) ALG3" source="105935" target="105797" cy:directed="1"/>
      <edge id="109238" label="MYBL1 (interacts with) XYLT1" source="105934" target="106854" cy:directed="1"/>
      <edge id="109237" label="MXD3 (interacts with) ALG9" source="105933" target="108554" cy:directed="1"/>
      <edge id="109236" label="MXD3 (interacts with) MOGS" source="105933" target="105762" cy:directed="1"/>
      <edge id="109235" label="MLLT1 (interacts with) SLC35E1" source="108601" target="106844" cy:directed="1"/>
      <edge id="109234" label="MITF (interacts with) MGAT4A" source="105929" target="106860" cy:directed="1"/>
      <edge id="109233" label="MITF (interacts with) GBA" source="105929" target="107309" cy:directed="1"/>
      <edge id="109232" label="MITF (interacts with) ST6GAL1" source="105929" target="106855" cy:directed="1"/>
      <edge id="109231" label="MITF (interacts with) MAN1A1" source="105929" target="105716" cy:directed="1"/>
      <edge id="109230" label="MITF (interacts with) LIPA" source="105929" target="105884" cy:directed="1"/>
      <edge id="109229" label="MITF (interacts with) B4GALT1" source="105929" target="107274" cy:directed="1"/>
      <edge id="109228" label="MITF (interacts with) GBGT1" source="105929" target="105897" cy:directed="1"/>
      <edge id="109227" label="MITF (interacts with) GALNT6" source="105929" target="108561" cy:directed="1"/>
      <edge id="109226" label="MITF (interacts with) NAGA" source="105929" target="108567" cy:directed="1"/>
      <edge id="109225" label="MITF (interacts with) GM2A" source="105929" target="105883" cy:directed="1"/>
      <edge id="109224" label="MITF (interacts with) LAMP2" source="105929" target="107350" cy:directed="1"/>
      <edge id="109223" label="MEF2C (interacts with) HS3ST4" source="105926" target="105938" cy:directed="1"/>
      <edge id="109222" label="MEF2B (interacts with) FUT2" source="106877" target="107287" cy:directed="1"/>
      <edge id="109221" label="MEF2B (interacts with) RFNG" source="106877" target="105744" cy:directed="1"/>
      <edge id="109220" label="MEF2B (interacts with) IDUA" source="106877" target="105749" cy:directed="1"/>
      <edge id="109219" label="MEF2A (interacts with) GALNT7" source="105925" target="106859" cy:directed="1"/>
      <edge id="109218" label="MEF2A (interacts with) B4GALT1" source="105925" target="107274" cy:directed="1"/>
      <edge id="109217" label="MEF2A (interacts with) STS" source="105925" target="108600" cy:directed="1"/>
      <edge id="109216" label="MEF2A (interacts with) ST6GAL1" source="105925" target="106855" cy:directed="1"/>
      <edge id="109215" label="MEF2A (interacts with) ST3GAL1" source="105925" target="108579" cy:directed="1"/>
      <edge id="109214" label="MEF2A (interacts with) NDST2" source="105925" target="105772" cy:directed="1"/>
      <edge id="109213" label="MEF2A (interacts with) DSE" source="105925" target="105779" cy:directed="1"/>
      <edge id="109212" label="MEF2A (interacts with) ACER2" source="105925" target="105691" cy:directed="1"/>
      <edge id="109211" label="MEF2A (interacts with) MAN2A1" source="105925" target="105694" cy:directed="1"/>
      <edge id="109210" label="MEF2A (interacts with) MAN1A1" source="105925" target="105716" cy:directed="1"/>
      <edge id="109209" label="MEF2A (interacts with) CSGALNACT2" source="105925" target="105715" cy:directed="1"/>
      <edge id="109208" label="MEF2A (interacts with) MGAT5" source="105925" target="105893" cy:directed="1"/>
      <edge id="109207" label="MED12 (interacts with) UGGT1" source="107324" target="105705" cy:directed="1"/>
      <edge id="109206" label="MED12 (interacts with) RTF1" source="107324" target="105700" cy:directed="1"/>
      <edge id="109205" label="MECP2 (interacts with) UGGT1" source="105921" target="105705" cy:directed="1"/>
      <edge id="109204" label="MBD4 (interacts with) GCNT1" source="108599" target="108552" cy:directed="1"/>
      <edge id="109203" label="MBD3 (interacts with) FUT2" source="107323" target="107287" cy:directed="1"/>
      <edge id="109202" label="MBD3 (interacts with) GAL3ST3" source="107323" target="108590" cy:directed="1"/>
      <edge id="109201" label="MBD3 (interacts with) MOGS" source="107323" target="105762" cy:directed="1"/>
      <edge id="109200" label="MBD3 (interacts with) B4GALNT4" source="107323" target="105784" cy:directed="1"/>
      <edge id="109199" label="MBD3 (interacts with) FKRP" source="107323" target="105896" cy:directed="1"/>
      <edge id="109198" label="MBD3 (interacts with) IDUA" source="107323" target="105749" cy:directed="1"/>
      <edge id="109197" label="MBD3 (interacts with) B4GALT2" source="107323" target="105917" cy:directed="1"/>
      <edge id="109196" label="MBD3 (interacts with) RFNG" source="107323" target="105744" cy:directed="1"/>
      <edge id="109195" label="MBD3 (interacts with) PIGQ" source="107323" target="105759" cy:directed="1"/>
      <edge id="109194" label="MAZ (interacts with) B4GALNT1" source="105916" target="107990" cy:directed="1"/>
      <edge id="109193" label="MAZ (interacts with) GALE" source="105916" target="108559" cy:directed="1"/>
      <edge id="109192" label="MAZ (interacts with) SLC35B1" source="105916" target="105798" cy:directed="1"/>
      <edge id="109191" label="MAZ (interacts with) COG4" source="105916" target="106892" cy:directed="1"/>
      <edge id="109190" label="MAZ (interacts with) ST3GAL3" source="105916" target="105747" cy:directed="1"/>
      <edge id="109189" label="MAZ (interacts with) GAL3ST3" source="105916" target="108590" cy:directed="1"/>
      <edge id="109188" label="MAZ (interacts with) SLC35B2" source="105916" target="108572" cy:directed="1"/>
      <edge id="109187" label="MAZ (interacts with) B4GALT3" source="105916" target="105789" cy:directed="1"/>
      <edge id="109186" label="MAZ (interacts with) MOGS" source="105916" target="105762" cy:directed="1"/>
      <edge id="109185" label="MAZ (interacts with) RFNG" source="105916" target="105744" cy:directed="1"/>
      <edge id="109184" label="MAZ (interacts with) B3GALT6" source="105916" target="105781" cy:directed="1"/>
      <edge id="109183" label="MAZ (interacts with) DPM2" source="105916" target="105758" cy:directed="1"/>
      <edge id="109182" label="MAZ (interacts with) B4GALT2" source="105916" target="105917" cy:directed="1"/>
      <edge id="109181" label="MAFF (interacts with) HK1" source="108598" target="107293" cy:directed="1"/>
      <edge id="109180" label="MAFB (interacts with) B4GALT1" source="105914" target="107274" cy:directed="1"/>
      <edge id="109179" label="MAFB (interacts with) NPL" source="105914" target="105860" cy:directed="1"/>
      <edge id="109178" label="MAFB (interacts with) DSE" source="105914" target="105779" cy:directed="1"/>
      <edge id="109177" label="MAF (interacts with) GCNT1" source="106876" target="108552" cy:directed="1"/>
      <edge id="109176" label="MAF (interacts with) MGAT4A" source="106876" target="106860" cy:directed="1"/>
      <edge id="109175" label="MAF (interacts with) B4GALT1" source="106876" target="107274" cy:directed="1"/>
      <edge id="109174" label="MAF (interacts with) GBGT1" source="106876" target="105897" cy:directed="1"/>
      <edge id="109173" label="MAF (interacts with) GM2A" source="106876" target="105883" cy:directed="1"/>
      <edge id="109172" label="LYL1 (interacts with) ST6GALNAC3" source="105911" target="105815" cy:directed="1"/>
      <edge id="109171" label="LYL1 (interacts with) MGAT4A" source="105911" target="106860" cy:directed="1"/>
      <edge id="109170" label="LYL1 (interacts with) GALNT6" source="105911" target="108561" cy:directed="1"/>
      <edge id="109169" label="LYL1 (interacts with) ST6GAL1" source="105911" target="106855" cy:directed="1"/>
      <edge id="109168" label="LYL1 (interacts with) HPSE" source="105911" target="106000" cy:directed="1"/>
      <edge id="109167" label="LYL1 (interacts with) RENBP" source="105911" target="105912" cy:directed="1"/>
      <edge id="109166" label="LYL1 (interacts with) MGAT1" source="105911" target="105724" cy:directed="1"/>
      <edge id="109165" label="LYL1 (interacts with) MAN2B1" source="105911" target="105777" cy:directed="1"/>
      <edge id="109164" label="LYL1 (interacts with) MFNG" source="105911" target="105766" cy:directed="1"/>
      <edge id="109163" label="LIN9 (interacts with) GCNT2" source="107321" target="107296" cy:directed="1"/>
      <edge id="109162" label="LIN9 (interacts with) DSEL" source="107321" target="105857" cy:directed="1"/>
      <edge id="109161" label="LIN9 (interacts with) ALG9" source="107321" target="108554" cy:directed="1"/>
      <edge id="109160" label="KLF15 (interacts with) LFNG" source="108597" target="106846" cy:directed="1"/>
      <edge id="109159" label="KDM5C (interacts with) PIGM" source="107314" target="105954" cy:directed="1"/>
      <edge id="109158" label="KDM5C (interacts with) SLC35E1" source="107314" target="106844" cy:directed="1"/>
      <edge id="109157" label="KDM5C (interacts with) FUT11" source="107314" target="105690" cy:directed="1"/>
      <edge id="109156" label="KDM5C (interacts with) MAN1A2" source="107314" target="105687" cy:directed="1"/>
      <edge id="109155" label="KDM5C (interacts with) STT3B" source="107314" target="105688" cy:directed="1"/>
      <edge id="109154" label="KDM5C (interacts with) NEU3" source="107314" target="105689" cy:directed="1"/>
      <edge id="109153" label="KDM5C (interacts with) RTF1" source="107314" target="105700" cy:directed="1"/>
      <edge id="109152" label="KDM4A (interacts with) COG8" source="106874" target="106891" cy:directed="1"/>
      <edge id="109151" label="KDM4A (interacts with) GNB1" source="106874" target="105902" cy:directed="1"/>
      <edge id="109150" label="KDM2B (interacts with) PIGW" source="107313" target="105729" cy:directed="1"/>
      <edge id="109149" label="KDM2B (interacts with) ST3GAL2" source="107313" target="105806" cy:directed="1"/>
      <edge id="109148" label="KDM2B (interacts with) CHST11" source="107313" target="105718" cy:directed="1"/>
      <edge id="109147" label="KDM2B (interacts with) UGGT1" source="107313" target="105705" cy:directed="1"/>
      <edge id="109146" label="KDM2B (interacts with) RTF1" source="107313" target="105700" cy:directed="1"/>
      <edge id="109145" label="KDM1A (interacts with) COG4" source="105901" target="106892" cy:directed="1"/>
      <edge id="109144" label="KDM1A (interacts with) DSEL" source="105901" target="105857" cy:directed="1"/>
      <edge id="109143" label="KDM1A (interacts with) B4GALT3" source="105901" target="105789" cy:directed="1"/>
      <edge id="109142" label="KDM1A (interacts with) B3GALT6" source="105901" target="105781" cy:directed="1"/>
      <edge id="109141" label="KDM1A (interacts with) B4GALT2" source="105901" target="105917" cy:directed="1"/>
      <edge id="109140" label="KDM1A (interacts with) UGDH" source="105901" target="108551" cy:directed="1"/>
      <edge id="109139" label="KDM1A (interacts with) GNB1" source="105901" target="105902" cy:directed="1"/>
      <edge id="109138" label="JUND (interacts with) B4GALNT4" source="105899" target="105784" cy:directed="1"/>
      <edge id="109137" label="JUND (interacts with) PIGQ" source="105899" target="105759" cy:directed="1"/>
      <edge id="109136" label="JUN (interacts with) CHSY1" source="105895" target="105717" cy:directed="1"/>
      <edge id="109135" label="JMJD6 (interacts with) B4GALT3" source="105894" target="105789" cy:directed="1"/>
      <edge id="109134" label="JMJD6 (interacts with) NANS" source="105894" target="108002" cy:directed="1"/>
      <edge id="109133" label="JMJD1C (interacts with) NDST2" source="105892" target="105772" cy:directed="1"/>
      <edge id="109132" label="JMJD1C (interacts with) MAN1A2" source="105892" target="105687" cy:directed="1"/>
      <edge id="109131" label="JMJD1C (interacts with) CSGALNACT2" source="105892" target="105715" cy:directed="1"/>
      <edge id="109130" label="JMJD1C (interacts with) STT3B" source="105892" target="105688" cy:directed="1"/>
      <edge id="109129" label="JARID2 (interacts with) PIGM" source="107311" target="105954" cy:directed="1"/>
      <edge id="109128" label="JARID2 (interacts with) FAM20B" source="107311" target="105731" cy:directed="1"/>
      <edge id="109127" label="JARID2 (interacts with) UGGT1" source="107311" target="105705" cy:directed="1"/>
      <edge id="109126" label="JARID2 (interacts with) NEU3" source="107311" target="105689" cy:directed="1"/>
      <edge id="109125" label="IRF8 (interacts with) GALNT6" source="105890" target="108561" cy:directed="1"/>
      <edge id="109124" label="IRF8 (interacts with) NAGA" source="105890" target="108567" cy:directed="1"/>
      <edge id="109123" label="IRF8 (interacts with) DSE" source="105890" target="105779" cy:directed="1"/>
      <edge id="109122" label="IRF8 (interacts with) ST6GAL1" source="105890" target="106855" cy:directed="1"/>
      <edge id="109121" label="IRF8 (interacts with) GM2A" source="105890" target="105883" cy:directed="1"/>
      <edge id="109120" label="IRF8 (interacts with) FUCA1" source="105890" target="106856" cy:directed="1"/>
      <edge id="109119" label="IRF8 (interacts with) MGAT4A" source="105890" target="106860" cy:directed="1"/>
      <edge id="109118" label="IRF8 (interacts with) LIPA" source="105890" target="105884" cy:directed="1"/>
      <edge id="109117" label="IRF8 (interacts with) HK3" source="105890" target="105859" cy:directed="1"/>
      <edge id="109116" label="IRF5 (interacts with) ST6GAL1" source="105889" target="106855" cy:directed="1"/>
      <edge id="109115" label="IRF5 (interacts with) GBA" source="105889" target="107309" cy:directed="1"/>
      <edge id="109114" label="IRF5 (interacts with) B4GALT1" source="105889" target="107274" cy:directed="1"/>
      <edge id="109113" label="IRF5 (interacts with) HPSE" source="105889" target="106000" cy:directed="1"/>
      <edge id="109112" label="IRF5 (interacts with) GAA" source="105889" target="108560" cy:directed="1"/>
      <edge id="109111" label="IRF5 (interacts with) NAGA" source="105889" target="108567" cy:directed="1"/>
      <edge id="109110" label="IRF5 (interacts with) NAAA" source="105889" target="107310" cy:directed="1"/>
      <edge id="109109" label="IRF5 (interacts with) GM2A" source="105889" target="105883" cy:directed="1"/>
      <edge id="109108" label="IRF5 (interacts with) GBGT1" source="105889" target="105897" cy:directed="1"/>
      <edge id="109107" label="IRF5 (interacts with) MGAT1" source="105889" target="105724" cy:directed="1"/>
      <edge id="109106" label="IRF5 (interacts with) MAN2B1" source="105889" target="105777" cy:directed="1"/>
      <edge id="109105" label="IRF5 (interacts with) MFNG" source="105889" target="105766" cy:directed="1"/>
      <edge id="109104" label="INTS3 (interacts with) MOGS" source="105886" target="105762" cy:directed="1"/>
      <edge id="109103" label="INTS3 (interacts with) IDUA" source="105886" target="105749" cy:directed="1"/>
      <edge id="109102" label="INO80 (interacts with) RTF1" source="105885" target="105700" cy:directed="1"/>
      <edge id="109101" label="IKZF1 (interacts with) GBA" source="105882" target="107309" cy:directed="1"/>
      <edge id="109100" label="IKZF1 (interacts with) ST3GAL1" source="105882" target="108579" cy:directed="1"/>
      <edge id="109099" label="IKZF1 (interacts with) CHST15" source="105882" target="106861" cy:directed="1"/>
      <edge id="109098" label="IKZF1 (interacts with) HPSE" source="105882" target="106000" cy:directed="1"/>
      <edge id="109097" label="IKZF1 (interacts with) GBGT1" source="105882" target="105897" cy:directed="1"/>
      <edge id="109096" label="IKZF1 (interacts with) NAGA" source="105882" target="108567" cy:directed="1"/>
      <edge id="109095" label="IKZF1 (interacts with) B4GALT1" source="105882" target="107274" cy:directed="1"/>
      <edge id="109094" label="IKZF1 (interacts with) GCNT1" source="105882" target="108552" cy:directed="1"/>
      <edge id="109093" label="IKZF1 (interacts with) GALNT6" source="105882" target="108561" cy:directed="1"/>
      <edge id="109092" label="IKZF1 (interacts with) NAGK" source="105882" target="105765" cy:directed="1"/>
      <edge id="109091" label="IKZF1 (interacts with) DSE" source="105882" target="105779" cy:directed="1"/>
      <edge id="109090" label="IKZF1 (interacts with) LIPA" source="105882" target="105884" cy:directed="1"/>
      <edge id="109089" label="IKZF1 (interacts with) NDST2" source="105882" target="105772" cy:directed="1"/>
      <edge id="109088" label="IKZF1 (interacts with) MAN1C1" source="105882" target="106853" cy:directed="1"/>
      <edge id="109087" label="IKZF1 (interacts with) FUCA1" source="105882" target="106856" cy:directed="1"/>
      <edge id="109086" label="IKZF1 (interacts with) ST6GAL1" source="105882" target="106855" cy:directed="1"/>
      <edge id="109085" label="IKZF1 (interacts with) GM2A" source="105882" target="105883" cy:directed="1"/>
      <edge id="109084" label="IKZF1 (interacts with) MAN2B1" source="105882" target="105777" cy:directed="1"/>
      <edge id="109083" label="IKZF1 (interacts with) MGAT4A" source="105882" target="106860" cy:directed="1"/>
      <edge id="109082" label="IKZF1 (interacts with) MFNG" source="105882" target="105766" cy:directed="1"/>
      <edge id="109081" label="HOXA1 (interacts with) GUSB" source="108596" target="108574" cy:directed="1"/>
      <edge id="109080" label="HIRA (interacts with) CHST11" source="108595" target="105718" cy:directed="1"/>
      <edge id="109079" label="HIRA (interacts with) XYLT1" source="108595" target="106854" cy:directed="1"/>
      <edge id="109078" label="HIRA (interacts with) NDST1" source="108595" target="105923" cy:directed="1"/>
      <edge id="109077" label="HINFP (interacts with) SLC35B1" source="105877" target="105798" cy:directed="1"/>
      <edge id="109076" label="HINFP (interacts with) B4GALT3" source="105877" target="105789" cy:directed="1"/>
      <edge id="109075" label="HIF1A (interacts with) GNPNAT1" source="106867" target="105855" cy:directed="1"/>
      <edge id="109074" label="HIF1A (interacts with) CHSY1" source="106867" target="105717" cy:directed="1"/>
      <edge id="109073" label="HDAC6 (interacts with) SULT1A3" source="108593" target="108594" cy:directed="1"/>
      <edge id="109072" label="HDAC6 (interacts with) MAN2A2" source="108593" target="105748" cy:directed="1"/>
      <edge id="109071" label="HDAC6 (interacts with) OGT" source="108593" target="105771" cy:directed="1"/>
      <edge id="109070" label="HDAC3 (interacts with) EXT2" source="107304" target="107307" cy:directed="1"/>
      <edge id="109069" label="HDAC3 (interacts with) DPM2" source="107304" target="105758" cy:directed="1"/>
      <edge id="109068" label="HDAC3 (interacts with) HEXB" source="107304" target="108585" cy:directed="1"/>
      <edge id="109067" label="HDAC3 (interacts with) ALG3" source="107304" target="105797" cy:directed="1"/>
      <edge id="109066" label="HDAC3 (interacts with) ALG8" source="107304" target="107286" cy:directed="1"/>
      <edge id="109065" label="HDAC3 (interacts with) SLC35B2" source="107304" target="108572" cy:directed="1"/>
      <edge id="109064" label="HDAC3 (interacts with) ALG14" source="107304" target="107992" cy:directed="1"/>
      <edge id="109063" label="HDAC3 (interacts with) GUSB" source="107304" target="108574" cy:directed="1"/>
      <edge id="109062" label="HDAC3 (interacts with) ALG5" source="107304" target="106012" cy:directed="1"/>
      <edge id="109061" label="HDAC3 (interacts with) PIGC" source="107304" target="108558" cy:directed="1"/>
      <edge id="109060" label="HDAC3 (interacts with) NEU1" source="107304" target="107971" cy:directed="1"/>
      <edge id="109059" label="HDAC3 (interacts with) PIGF" source="107304" target="108557" cy:directed="1"/>
      <edge id="109058" label="HDAC3 (interacts with) DPM3" source="107304" target="105722" cy:directed="1"/>
      <edge id="109057" label="HDAC3 (interacts with) SLC35B1" source="107304" target="105798" cy:directed="1"/>
      <edge id="109056" label="HDAC3 (interacts with) RPN1" source="107304" target="105936" cy:directed="1"/>
      <edge id="109055" label="HDAC3 (interacts with) GLA" source="107304" target="108026" cy:directed="1"/>
      <edge id="109054" label="HDAC3 (interacts with) DDOST" source="107304" target="108555" cy:directed="1"/>
      <edge id="109053" label="HDAC3 (interacts with) DPM1" source="107304" target="105799" cy:directed="1"/>
      <edge id="109052" label="HDAC3 (interacts with) B4GALT3" source="107304" target="105789" cy:directed="1"/>
      <edge id="109051" label="HDAC3 (interacts with) B4GALT7" source="107304" target="105782" cy:directed="1"/>
      <edge id="109050" label="HDAC3 (interacts with) SLC35A4" source="107304" target="108586" cy:directed="1"/>
      <edge id="109049" label="HDAC3 (interacts with) GNPDA1" source="107304" target="107305" cy:directed="1"/>
      <edge id="109048" label="HDAC2 (interacts with) ALG11" source="108592" target="107300" cy:directed="1"/>
      <edge id="109047" label="HDAC2 (interacts with) SLC35F1" source="108592" target="105927" cy:directed="1"/>
      <edge id="109046" label="HDAC2 (interacts with) GNB1" source="108592" target="105902" cy:directed="1"/>
      <edge id="109045" label="HDAC2 (interacts with) B4GALT3" source="108592" target="105789" cy:directed="1"/>
      <edge id="109044" label="HDAC2 (interacts with) SLC35B1" source="108592" target="105798" cy:directed="1"/>
      <edge id="109043" label="HDAC2 (interacts with) UGDH" source="108592" target="108551" cy:directed="1"/>
      <edge id="109042" label="HDAC2 (interacts with) ALG9" source="108592" target="108554" cy:directed="1"/>
      <edge id="109041" label="HDAC2 (interacts with) PIGW" source="108592" target="105729" cy:directed="1"/>
      <edge id="109040" label="HDAC2 (interacts with) GNE" source="108592" target="107297" cy:directed="1"/>
      <edge id="109039" label="HCFC1 (interacts with) ST3GAL2" source="105873" target="105806" cy:directed="1"/>
      <edge id="109038" label="HCFC1 (interacts with) UGGT1" source="105873" target="105705" cy:directed="1"/>
      <edge id="109037" label="HBP1 (interacts with) GNPDA1" source="108591" target="107305" cy:directed="1"/>
      <edge id="109036" label="H2AFX (interacts with) COG4" source="105872" target="106892" cy:directed="1"/>
      <edge id="109035" label="H2AFX (interacts with) GAL3ST3" source="105872" target="108590" cy:directed="1"/>
      <edge id="109034" label="H2AFX (interacts with) SLC35B1" source="105872" target="105798" cy:directed="1"/>
      <edge id="109033" label="H2AFX (interacts with) GALE" source="105872" target="108559" cy:directed="1"/>
      <edge id="109032" label="H2AFX (interacts with) RFNG" source="105872" target="105744" cy:directed="1"/>
      <edge id="109031" label="H2AFX (interacts with) B3GALT6" source="105872" target="105781" cy:directed="1"/>
      <edge id="109030" label="H2AFX (interacts with) DPM2" source="105872" target="105758" cy:directed="1"/>
      <edge id="109029" label="GTF3C2 (interacts with) ST3GAL2" source="107302" target="105806" cy:directed="1"/>
      <edge id="109028" label="GTF3C2 (interacts with) GANAB" source="107302" target="105998" cy:directed="1"/>
      <edge id="109027" label="GTF3C2 (interacts with) RTF1" source="107302" target="105700" cy:directed="1"/>
      <edge id="109026" label="GTF2I (interacts with) POFUT1" source="105871" target="105792" cy:directed="1"/>
      <edge id="109025" label="GTF2I (interacts with) MGAT5" source="105871" target="105893" cy:directed="1"/>
      <edge id="109024" label="GTF2I (interacts with) ALG10B" source="105871" target="105727" cy:directed="1"/>
      <edge id="109023" label="GTF2I (interacts with) GANAB" source="105871" target="105998" cy:directed="1"/>
      <edge id="109022" label="GTF2I (interacts with) SLC35E1" source="105871" target="106844" cy:directed="1"/>
      <edge id="109021" label="GTF2I (interacts with) UGGT1" source="105871" target="105705" cy:directed="1"/>
      <edge id="109020" label="GTF2I (interacts with) COG5" source="105871" target="105692" cy:directed="1"/>
      <edge id="109019" label="GTF2F1 (interacts with) SLC35E1" source="105870" target="106844" cy:directed="1"/>
      <edge id="109018" label="GTF2F1 (interacts with) B4GALNT4" source="105870" target="105784" cy:directed="1"/>
      <edge id="109017" label="GTF2F1 (interacts with) POMT2" source="105870" target="108023" cy:directed="1"/>
      <edge id="109016" label="GTF2F1 (interacts with) COG1" source="105870" target="106005" cy:directed="1"/>
      <edge id="109015" label="GTF2F1 (interacts with) COG7" source="105870" target="105791" cy:directed="1"/>
      <edge id="109014" label="GTF2B (interacts with) DDOST" source="105868" target="108555" cy:directed="1"/>
      <edge id="109013" label="GTF2B (interacts with) C1GALT1C1" source="105868" target="106032" cy:directed="1"/>
      <edge id="109012" label="GTF2B (interacts with) UAP1" source="105868" target="105820" cy:directed="1"/>
      <edge id="109011" label="GTF2B (interacts with) RPN1" source="105868" target="105936" cy:directed="1"/>
      <edge id="109010" label="GTF2B (interacts with) NEU1" source="105868" target="107971" cy:directed="1"/>
      <edge id="109009" label="GTF2B (interacts with) GLA" source="105868" target="108026" cy:directed="1"/>
      <edge id="109008" label="GTF2B (interacts with) B4GALT3" source="105868" target="105789" cy:directed="1"/>
      <edge id="109007" label="GTF2B (interacts with) PIGC" source="105868" target="108558" cy:directed="1"/>
      <edge id="109006" label="GTF2B (interacts with) GNPDA1" source="105868" target="107305" cy:directed="1"/>
      <edge id="109005" label="GTF2B (interacts with) DAD1" source="105868" target="108008" cy:directed="1"/>
      <edge id="109004" label="GTF2B (interacts with) ALG5" source="105868" target="106012" cy:directed="1"/>
      <edge id="109003" label="GTF2B (interacts with) PIGF" source="105868" target="108557" cy:directed="1"/>
      <edge id="109002" label="GTF2B (interacts with) PIGY" source="105868" target="107332" cy:directed="1"/>
      <edge id="109001" label="GTF2B (interacts with) DPM1" source="105868" target="105799" cy:directed="1"/>
      <edge id="109000" label="GTF2B (interacts with) ALG14" source="105868" target="107992" cy:directed="1"/>
      <edge id="108999" label="GMEB2 (interacts with) GANAB" source="108589" target="105998" cy:directed="1"/>
      <edge id="108998" label="GMEB2 (interacts with) ST3GAL2" source="108589" target="105806" cy:directed="1"/>
      <edge id="108997" label="GMEB2 (interacts with) MOGS" source="108589" target="105762" cy:directed="1"/>
      <edge id="108996" label="GATAD1 (interacts with) SLC35D1" source="105863" target="105950" cy:directed="1"/>
      <edge id="108995" label="GATAD1 (interacts with) SLC35B4" source="105863" target="105845" cy:directed="1"/>
      <edge id="108994" label="GATAD1 (interacts with) COG1" source="105863" target="106005" cy:directed="1"/>
      <edge id="108993" label="GATAD1 (interacts with) COG5" source="105863" target="105692" cy:directed="1"/>
      <edge id="108992" label="GATAD1 (interacts with) COG3" source="105863" target="105823" cy:directed="1"/>
      <edge id="108991" label="GATAD1 (interacts with) POFUT2" source="105863" target="107327" cy:directed="1"/>
      <edge id="108990" label="GATAD1 (interacts with) OGT" source="105863" target="105771" cy:directed="1"/>
      <edge id="108989" label="GATAD1 (interacts with) PIGL" source="105863" target="108578" cy:directed="1"/>
      <edge id="108988" label="GAPDH (interacts with) SLC35C1" source="106863" target="108588" cy:directed="1"/>
      <edge id="108987" label="GAPDH (interacts with) GPI" source="106863" target="106864" cy:directed="1"/>
      <edge id="108986" label="GABPA (interacts with) PIGW" source="105861" target="105729" cy:directed="1"/>
      <edge id="108985" label="GABPA (interacts with) COG2" source="105861" target="105973" cy:directed="1"/>
      <edge id="108984" label="GABPA (interacts with) ALG10" source="105861" target="105711" cy:directed="1"/>
      <edge id="108983" label="GABPA (interacts with) COG6" source="105861" target="105824" cy:directed="1"/>
      <edge id="108982" label="GABPA (interacts with) SLC35B4" source="105861" target="105845" cy:directed="1"/>
      <edge id="108981" label="GABPA (interacts with) ALG13" source="105861" target="105864" cy:directed="1"/>
      <edge id="108980" label="GABPA (interacts with) B3GALNT2" source="105861" target="105908" cy:directed="1"/>
      <edge id="108979" label="GABPA (interacts with) COG5" source="105861" target="105692" cy:directed="1"/>
      <edge id="108978" label="GABPA (interacts with) SLC35A3" source="105861" target="105695" cy:directed="1"/>
      <edge id="108977" label="GABPA (interacts with) PIGN" source="105861" target="105730" cy:directed="1"/>
      <edge id="108976" label="GABPA (interacts with) PIGK" source="105861" target="106835" cy:directed="1"/>
      <edge id="108975" label="GABPA (interacts with) EXTL2" source="105861" target="105844" cy:directed="1"/>
      <edge id="108974" label="GABPA (interacts with) STT3B" source="105861" target="105688" cy:directed="1"/>
      <edge id="108973" label="GABPA (interacts with) FPGT" source="105861" target="105976" cy:directed="1"/>
      <edge id="108972" label="GABPA (interacts with) ALG10B" source="105861" target="105727" cy:directed="1"/>
      <edge id="108971" label="FUS (interacts with) B4GALNT4" source="106862" target="105784" cy:directed="1"/>
      <edge id="108970" label="FOXO3 (interacts with) COG1" source="108587" target="106005" cy:directed="1"/>
      <edge id="108969" label="FOXO3 (interacts with) NDST1" source="108587" target="105923" cy:directed="1"/>
      <edge id="108968" label="FOXO3 (interacts with) MAN1A2" source="108587" target="105687" cy:directed="1"/>
      <edge id="108967" label="FOXM1 (interacts with) ST3GAL2" source="105853" target="105806" cy:directed="1"/>
      <edge id="108966" label="FOXM1 (interacts with) SLC35A4" source="105853" target="108586" cy:directed="1"/>
      <edge id="108965" label="FOXM1 (interacts with) SLC35B2" source="105853" target="108572" cy:directed="1"/>
      <edge id="108964" label="FOXM1 (interacts with) B3GALT6" source="105853" target="105781" cy:directed="1"/>
      <edge id="108963" label="FOXM1 (interacts with) B4GALT2" source="105853" target="105917" cy:directed="1"/>
      <edge id="108962" label="FOXM1 (interacts with) ALG9" source="105853" target="108554" cy:directed="1"/>
      <edge id="108961" label="FOXM1 (interacts with) GNB1" source="105853" target="105902" cy:directed="1"/>
      <edge id="108960" label="FOXM1 (interacts with) B4GALT3" source="105853" target="105789" cy:directed="1"/>
      <edge id="108959" label="FOXM1 (interacts with) MOGS" source="105853" target="105762" cy:directed="1"/>
      <edge id="108958" label="FOXM1 (interacts with) PIGW" source="105853" target="105729" cy:directed="1"/>
      <edge id="108957" label="FOXM1 (interacts with) GANAB" source="105853" target="105998" cy:directed="1"/>
      <edge id="108956" label="FOXM1 (interacts with) SLC35B1" source="105853" target="105798" cy:directed="1"/>
      <edge id="108955" label="FOXK1 (interacts with) POMT2" source="107298" target="108023" cy:directed="1"/>
      <edge id="108954" label="FOXK1 (interacts with) COG1" source="107298" target="106005" cy:directed="1"/>
      <edge id="108953" label="FOXK1 (interacts with) MAN2A2" source="107298" target="105748" cy:directed="1"/>
      <edge id="108952" label="FOXK1 (interacts with) SLC35E1" source="107298" target="106844" cy:directed="1"/>
      <edge id="108951" label="FOXK1 (interacts with) NDST1" source="107298" target="105923" cy:directed="1"/>
      <edge id="108950" label="FOSL1 (interacts with) MGAT2" source="107294" target="106868" cy:directed="1"/>
      <edge id="108949" label="FOSL1 (interacts with) HEXB" source="107294" target="108585" cy:directed="1"/>
      <edge id="108948" label="FOSL1 (interacts with) UGP2" source="107294" target="108584" cy:directed="1"/>
      <edge id="108947" label="FOSL1 (interacts with) HK1" source="107294" target="107293" cy:directed="1"/>
      <edge id="108946" label="FOSL1 (interacts with) CHPF" source="107294" target="108583" cy:directed="1"/>
      <edge id="108945" label="FOSL1 (interacts with) CHSY1" source="107294" target="105717" cy:directed="1"/>
      <edge id="108944" label="FLI1 (interacts with) NAAA" source="105848" target="107310" cy:directed="1"/>
      <edge id="108943" label="FLI1 (interacts with) NAGA" source="105848" target="108567" cy:directed="1"/>
      <edge id="108942" label="FLI1 (interacts with) B3GNT2" source="105848" target="106838" cy:directed="1"/>
      <edge id="108941" label="FLI1 (interacts with) GBGT1" source="105848" target="105897" cy:directed="1"/>
      <edge id="108940" label="FLI1 (interacts with) ST3GAL1" source="105848" target="108579" cy:directed="1"/>
      <edge id="108939" label="FLI1 (interacts with) HPSE" source="105848" target="106000" cy:directed="1"/>
      <edge id="108938" label="FLI1 (interacts with) DSE" source="105848" target="105779" cy:directed="1"/>
      <edge id="108937" label="FLI1 (interacts with) NDST2" source="105848" target="105772" cy:directed="1"/>
      <edge id="108936" label="FLI1 (interacts with) B4GALT1" source="105848" target="107274" cy:directed="1"/>
      <edge id="108935" label="FLI1 (interacts with) GAL3ST4" source="105848" target="105778" cy:directed="1"/>
      <edge id="108934" label="FLI1 (interacts with) GM2A" source="105848" target="105883" cy:directed="1"/>
      <edge id="108933" label="FLI1 (interacts with) PAPSS2" source="105848" target="107328" cy:directed="1"/>
      <edge id="108932" label="FLI1 (interacts with) CHST15" source="105848" target="106861" cy:directed="1"/>
      <edge id="108931" label="FLI1 (interacts with) ST6GAL1" source="105848" target="106855" cy:directed="1"/>
      <edge id="108930" label="FLI1 (interacts with) MGAT4A" source="105848" target="106860" cy:directed="1"/>
      <edge id="108929" label="FLI1 (interacts with) MFNG" source="105848" target="105766" cy:directed="1"/>
      <edge id="108928" label="FANCD2 (interacts with) PIGW" source="105847" target="105729" cy:directed="1"/>
      <edge id="108927" label="EZH2 (interacts with) SLC35B2" source="108582" target="108572" cy:directed="1"/>
      <edge id="108926" label="EZH2 (interacts with) B4GALT2" source="108582" target="105917" cy:directed="1"/>
      <edge id="108925" label="EZH2 (interacts with) SLC35B1" source="108582" target="105798" cy:directed="1"/>
      <edge id="108924" label="EZH2 (interacts with) B4GALT3" source="108582" target="105789" cy:directed="1"/>
      <edge id="108923" label="EZH2 (interacts with) GANAB" source="108582" target="105998" cy:directed="1"/>
      <edge id="108922" label="EZH2 (interacts with) MOGS" source="108582" target="105762" cy:directed="1"/>
      <edge id="108921" label="EZH2 (interacts with) PIGW" source="108582" target="105729" cy:directed="1"/>
      <edge id="108920" label="EZH1 (interacts with) NDST1" source="105846" target="105923" cy:directed="1"/>
      <edge id="108919" label="EZH1 (interacts with) COG1" source="105846" target="106005" cy:directed="1"/>
      <edge id="108918" label="ETV4 (interacts with) CHST7" source="108581" target="105835" cy:directed="1"/>
      <edge id="108917" label="ETV1 (interacts with) SLC35B2" source="105842" target="108572" cy:directed="1"/>
      <edge id="108916" label="ETV1 (interacts with) PIGW" source="105842" target="105729" cy:directed="1"/>
      <edge id="108915" label="ETV1 (interacts with) EXTL3" source="105842" target="107299" cy:directed="1"/>
      <edge id="108914" label="ETV1 (interacts with) ALG9" source="105842" target="108554" cy:directed="1"/>
      <edge id="108913" label="ETV1 (interacts with) SLC35B1" source="105842" target="105798" cy:directed="1"/>
      <edge id="108912" label="ETV1 (interacts with) B4GALT3" source="105842" target="105789" cy:directed="1"/>
      <edge id="108911" label="ETV1 (interacts with) EXTL2" source="105842" target="105844" cy:directed="1"/>
      <edge id="108910" label="ETS1 (interacts with) GNPNAT1" source="105839" target="105855" cy:directed="1"/>
      <edge id="108909" label="ETS1 (interacts with) B4GALT5" source="105839" target="107279" cy:directed="1"/>
      <edge id="108908" label="ETS1 (interacts with) UGDH" source="105839" target="108551" cy:directed="1"/>
      <edge id="108907" label="ETS1 (interacts with) DPAGT1" source="105839" target="105878" cy:directed="1"/>
      <edge id="108906" label="ETS1 (interacts with) EXT1" source="105839" target="108580" cy:directed="1"/>
      <edge id="108905" label="ETS1 (interacts with) MAN1A2" source="105839" target="105687" cy:directed="1"/>
      <edge id="108904" label="ETS1 (interacts with) ALG11" source="105839" target="107300" cy:directed="1"/>
      <edge id="108903" label="ETS1 (interacts with) STT3A" source="105839" target="106893" cy:directed="1"/>
      <edge id="108902" label="ETS1 (interacts with) ALG9" source="105839" target="108554" cy:directed="1"/>
      <edge id="108901" label="ETS1 (interacts with) ACER2" source="105839" target="105691" cy:directed="1"/>
      <edge id="108900" label="ETS1 (interacts with) FUT11" source="105839" target="105690" cy:directed="1"/>
      <edge id="108899" label="ETS1 (interacts with) GNB1" source="105839" target="105902" cy:directed="1"/>
      <edge id="108898" label="ETS1 (interacts with) UGGT1" source="105839" target="105705" cy:directed="1"/>
      <edge id="108897" label="ETS1 (interacts with) SULF2" source="105839" target="105979" cy:directed="1"/>
      <edge id="108896" label="ETS1 (interacts with) MGAT5" source="105839" target="105893" cy:directed="1"/>
      <edge id="108895" label="ETS1 (interacts with) NEU3" source="105839" target="105689" cy:directed="1"/>
      <edge id="108894" label="ETS1 (interacts with) ST3GAL2" source="105839" target="105806" cy:directed="1"/>
      <edge id="108893" label="ETS1 (interacts with) CHSY1" source="105839" target="105717" cy:directed="1"/>
      <edge id="108892" label="ETS1 (interacts with) CHST11" source="105839" target="105718" cy:directed="1"/>
      <edge id="108891" label="ERG (interacts with) ABO" source="105832" target="107319" cy:directed="1"/>
      <edge id="108890" label="ERG (interacts with) PAPSS2" source="105832" target="107328" cy:directed="1"/>
      <edge id="108889" label="ERG (interacts with) ST3GAL1" source="105832" target="108579" cy:directed="1"/>
      <edge id="108888" label="ERG (interacts with) FUT1" source="105832" target="105802" cy:directed="1"/>
      <edge id="108887" label="ERF (interacts with) EXTL3" source="105831" target="107299" cy:directed="1"/>
      <edge id="108886" label="ERCC3 (interacts with) ALG9" source="107292" target="108554" cy:directed="1"/>
      <edge id="108885" label="ERCC3 (interacts with) PIGL" source="107292" target="108578" cy:directed="1"/>
      <edge id="108884" label="EPAS1 (interacts with) CHSY1" source="108577" target="105717" cy:directed="1"/>
      <edge id="108883" label="EPAS1 (interacts with) GPI" source="108577" target="106864" cy:directed="1"/>
      <edge id="108882" label="EP400 (interacts with) FKTN" source="105829" target="105713" cy:directed="1"/>
      <edge id="108881" label="ELK3 (interacts with) SLC35A3" source="105826" target="105695" cy:directed="1"/>
      <edge id="108880" label="ELK3 (interacts with) CHSY1" source="105826" target="105717" cy:directed="1"/>
      <edge id="108879" label="ELK3 (interacts with) FUT11" source="105826" target="105690" cy:directed="1"/>
      <edge id="108878" label="EGR2 (interacts with) MAN2A1" source="105816" target="105694" cy:directed="1"/>
      <edge id="108877" label="EGR2 (interacts with) FUT11" source="105816" target="105690" cy:directed="1"/>
      <edge id="108876" label="EGR2 (interacts with) CHSY1" source="105816" target="105717" cy:directed="1"/>
      <edge id="108875" label="EBNA1BP2 (interacts with) PIGC" source="108576" target="108558" cy:directed="1"/>
      <edge id="108874" label="EBNA1BP2 (interacts with) DDOST" source="108576" target="108555" cy:directed="1"/>
      <edge id="108873" label="EBNA1BP2 (interacts with) DPM1" source="108576" target="105799" cy:directed="1"/>
      <edge id="108872" label="E2F8 (interacts with) ALG9" source="108575" target="108554" cy:directed="1"/>
      <edge id="108871" label="E2F8 (interacts with) MOGS" source="108575" target="105762" cy:directed="1"/>
      <edge id="108870" label="E2F8 (interacts with) GANAB" source="108575" target="105998" cy:directed="1"/>
      <edge id="108869" label="E2F7 (interacts with) GUSB" source="105803" target="108574" cy:directed="1"/>
      <edge id="108868" label="E2F7 (interacts with) ALG9" source="105803" target="108554" cy:directed="1"/>
      <edge id="108867" label="E2F7 (interacts with) B3GALNT2" source="105803" target="105908" cy:directed="1"/>
      <edge id="108866" label="E2F7 (interacts with) STT3A" source="105803" target="106893" cy:directed="1"/>
      <edge id="108865" label="E2F7 (interacts with) RTF1" source="105803" target="105700" cy:directed="1"/>
      <edge id="108864" label="E2F7 (interacts with) GANAB" source="105803" target="105998" cy:directed="1"/>
      <edge id="108863" label="E2F7 (interacts with) ALG6" source="105803" target="106879" cy:directed="1"/>
      <edge id="108862" label="E2F7 (interacts with) PIGW" source="105803" target="105729" cy:directed="1"/>
      <edge id="108861" label="E2F6 (interacts with) DDOST" source="105801" target="108555" cy:directed="1"/>
      <edge id="108860" label="E2F6 (interacts with) PMM2" source="105801" target="108556" cy:directed="1"/>
      <edge id="108859" label="E2F6 (interacts with) B4GALT3" source="105801" target="105789" cy:directed="1"/>
      <edge id="108858" label="E2F6 (interacts with) PIGY" source="105801" target="107332" cy:directed="1"/>
      <edge id="108857" label="E2F6 (interacts with) ALG6" source="105801" target="106879" cy:directed="1"/>
      <edge id="108856" label="E2F6 (interacts with) ALG8" source="105801" target="107286" cy:directed="1"/>
      <edge id="108855" label="E2F6 (interacts with) DPM1" source="105801" target="105799" cy:directed="1"/>
      <edge id="108854" label="E2F6 (interacts with) EXTL2" source="105801" target="105844" cy:directed="1"/>
[truncated: 2,429,258 more chars]
