# Supplementary material for: A systems-based framework to computationally describe putative transcription factors and signaling pathways regulating glycan biosynthesis
Source: publisher site journal article supplement (doi:10.3762/bjoc.17.119), 2021-07-22
Supplement: Additional file 2 [file 1860-5397-17-119-S2.cys › CytoscapeSession-2021_03_21-12_01/tables/105658-Cistrome+Cancer+TF%2DGlycogene+Networks/LOCAL_ATTRS-org.cytoscape.model.CyNetwork-105658+default+network.cytable]

"CyCSV-Version","1"
"SUID","name","selected"
"java.lang.Long","java.lang.String","java.lang.Boolean"
"","",""
"105658 default network",""
"105658","Cistrome Cancer TF-Glycogene Networks","false"
