# Supplementary material for: A systems-based framework to computationally describe putative transcription factors and signaling pathways regulating glycan biosynthesis
Source: publisher site journal article supplement (doi:10.3762/bjoc.17.119), 2021-07-22
Supplement: Additional file 2 [file 1860-5397-17-119-S2.cys › CytoscapeSession-2021_03_21-12_01/tables/105658-Cistrome+Cancer+TF%2DGlycogene+Networks/LOCAL_ATTRS-org.cytoscape.model.CyNode-105658+default+node.cytable]

CyCSV-Version	1
SUID	name	selected
java.lang.Long	java.lang.String	java.lang.Boolean
105658 default node
105684		false
105685		false
105686		false
105687		false
105688		false
105689		false
105690		false
105694		false
105691		false
105692		false
105985		false
105697		false
105705		false
105695		false
105950		false
105702		false
105696		false
105906		false
105709		false
105883		false
105701		false
105704		false
105713		false
105710		false
105711		false
105712		false
105714		false
105715		false
105721		false
105765		false
105763		false
105912		false
105723		false
105724		false
105736		false
105754		false
105738		false
105727		false
105806		false
105752		false
105744		false
105753		false
105755		false
105756		false
105757		false
105758		false
105746		false
105880		false
105769		false
105770		false
105748		false
105893		false
105773		false
105998		false
105774		false
105775		false
105780		false
105781		false
105786		false
105874		false
105794		false
105795		false
105707		false
105804		false
105716		false
105813		false
105821		false
105784		false
105822		false
105823		false
105825		false
105826		false
105827		false
105731		false
105805		false
105830		false
105832		false
105766		false
105833		false
105835		false
105839		false
105834		false
105848		false
105850		false
105856		false
105858		false
105861		false
105866		false
105791		false
105867		false
105871		false
105872		false
105873		false
105875		false
105876		false
105879		false
105917		false
105882		false
105776		false
105860		false
105885		false
105700		false
105841		false
105887		false
105859		false
105782		false
105888		false
105889		false
105890		false
105884		false
105779		false
105891		false
105892		false
105894		false
106005		false
105844		false
105903		false
105904		false
105911		false
105777		false
105749		false
106030		false
105914		false
105916		false
105924		false
105925		false
105717		false
105926		false
105931		false
105932		false
105933		false
105934		false
105802		false
105937		false
105943		false
105946		false
105747		false
105762		false
105947		false
105948		false
105949		false
105955		false
105957		false
105958		false
105959		false
105960		false
105962		false
105718		false
105963		false
105964		false
105967		false
105968		false
105824		false
105905		false
105969		false
105970		false
105974		false
105703		false
105975		false
105981		false
105982		false
105984		false
105759		false
105722		false
105986		false
106014		false
105989		false
105990		false
105991		false
105807		false
105811		false
105993		false
105838		false
105994		false
105999		false
106000		false
106001		false
106002		false
106006		false
105771		false
106007		false
106011		false
106013		false
106016		false
106021		false
105789		false
106023		false
106026		false
106029		false
106836		false
105699		false
105732		false
106856		false
106857		false
106860		false
105730		false
105728		false
105729		false
105733		false
105734		false
105772		false
106843		false
106844		false
105792		false
105739		false
105745		false
106853		false
105778		false
106848		false
106891		false
105764		false
106849		false
105785		false
105790		false
105796		false
105735		false
105803		false
105878		false
106893		false
105819		false
105829		false
105941		false
106859		false
105920		false
105923		false
106838		false
106863		false
106864		false
105862		false
105810		false
106866		false
105742		false
106867		false
105877		false
105886		false
106871		false
105750		false
105907		false
105976		false
106875		false
105720		false
105800		false
105919		false
106032		false
105928		false
105942		false
105896		false
105954		false
106835		false
105761		false
105953		false
105956		false
105965		false
105908		false
105855		false
105978		false
105983		false
105973		false
106885		false
106879		false
105987		false
105997		false
106003		false
106889		false
106009		false
106012		false
106892		false
106890		false
106017		false
106019		false
106020		false
106024		false
106025		false
106028		false
106868		false
106031		false
105854		false
105799		false
107279		false
106837		false
106846		false
105708		false
106845		false
105741		false
105966		false
105767		false
105768		false
105783		false
105793		false
105851		false
106850		false
105797		false
105801		false
107285		false
107286		false
107281		false
107300		false
107295		false
105979		false
105840		false
105857		false
105863		false
106883		false
105719		false
105868		false
105869		false
107332		false
107304		false
107305		false
105918		false
106855		false
106872		false
106861		false
107311		false
105922		false
106854		false
105798		false
107313		false
107315		false
107317		false
105820		false
107297		false
107352		false
105751		false
107318		false
105809		false
105927		false
107327		false
105915		false
105852		false
107322		false
107323		false
107324		false
106878		false
105935		false
106887		false
107326		false
107329		false
105843		false
107334		false
107335		false
107350		false
107274		false
107338		false
105845		false
107339		false
107341		false
107344		false
105995		false
107347		false
106004		false
107349		false
105864		false
107351		false
106008		false
106010		false
106018		false
106882		false
107278		false
105706		false
107972		false
107306		false
105936		false
105725		false
107275		false
105726		false
107276		false
107277		false
108023		false
107977		false
107978		false
107990		false
108026		false
105743		false
106847		false
107309		false
107282		false
107299		false
107284		false
107987		false
105816		false
107292		false
105831		false
107328		false
107319		false
105902		false
105842		false
105846		false
105847		false
105897		false
107310		false
107294		false
107293		false
107298		false
105853		false
106862		false
107992		false
108008		false
107971		false
105870		false
107302		false
107307		false
108002		false
105895		false
105899		false
105901		false
106874		false
107314		false
107321		false
107296		false
105815		false
106876		false
107287		false
105921		false
106877		false
105938		false
105929		false
105737		false
105945		false
105818		false
108016		false
105951		false
107333		false
107980		false
106880		false
106881		false
106884		false
108022		false
108024		false
105971		false
105972		false
105837		false
107337		false
108001		false
108025		false
107979		false
107342		false
107343		false
105808		false
107345		false
108013		false
107346		false
108029		false
108030		false
107353		false
106022		false
107291		false
106027		false
106894		false
108027		false
108550		false
107973		false
106858		false
108015		false
105812		false
105930		false
105760		false
108564		false
108586		false
105787		false
108000		false
107986		false
107976		false
108567		false
108018		false
107989		false
108576		false
108554		false
108551		false
108580		false
108582		false
108600		false
105913		false
107999		false
108003		false
107289		false
108579		false
108005		false
108587		false
107301		false
107303		false
108592		false
108566		false
107998		false
107993		false
108007		false
105881		false
105698		false
108004		false
108552		false
108555		false
107316		false
108598		false
105980		false
107983		false
108009		false
105944		false
108557		false
107336		false
108611		false
108613		false
108616		false
108617		false
108572		false
108032		false
108618		false
108621		false
108028		false
105996		false
107290		false
108585		false
105740		false
107331		false
106840		false
108629		false
107356		false
108039		false
107975		false
107340		false
109689		false
108584		false
109671		false
108568		false
107985		false
108570		false
108575		false
108589		false
106865		false
108591		false
106870		false
108578		false
108605		false
107312		false
107320		false
105909		false
108560		false
108559		false
108038		false
108588		false
108608		false
108590		false
109684		false
108614		false
108623		false
108625		false
108628		false
110787		false
105693		false
107273		false
106869		false
107984		false
108561		false
110789		false
110804		false
106851		false
108612		false
110793		false
108571		false
108556		false
108010		false
106852		false
107288		false
110794		false
109680		false
108594		false
107991		false
105865		false
109678		false
110806		false
108593		false
109679		false
107995		false
107308		false
105900		false
106873		false
107997		false
108597		false
108006		false
108011		false
109685		false
108017		false
105961		false
108021		false
108610		false
108034		false
108615		false
106886		false
105988		false
109686		false
110812		false
105992		false
107348		false
108558		false
108622		false
108624		false
108031		false
107996		false
108035		false
108626		false
108548		false
111091		false
111092		false
111093		false
109670		false
111095		false
105788		false
111096		false
105910		false
105939		false
111097		false
110795		false
111101		false
108595		false
107994		false
107974		false
111104		false
111106		false
108601		false
110801		false
108603		false
107330		false
110807		false
111110		false
110809		false
108620		false
106842		false
111099		false
111090		false
111113		false
109690		false
106015		false
108606		false
109691		false
107970		false
112214		false
108553		false
111105		false
106841		false
109673		false
108563		false
110791		false
108569		false
106839		false
105836		false
105849		false
111100		false
111115		false
109677		false
112223		false
112222		false
109675		false
105898		false
109669		false
112224		false
110799		false
107325		false
108602		false
111112		false
110808		false
108609		false
110810		false
105977		false
108014		false
110813		false
106888		false
111114		false
110815		false
108627		false
111116		false
109692		false
108037		false
108020		false
108549		false
109682		false
109674		false
108565		false
112217		false
108574		false
112218		false
105828		false
113217		false
112220		false
112221		false
111102		false
105940		false
108033		false
113216		false
107981		false
109683		false
108604		false
108607		false
105817		false
113233		false
112227		false
113219		false
108619		false
113234		false
107355		false
110814		false
113235		false
109688		false
114936		false
112230		false
112219		false
113218		false
113227		false
105952		false
113231		false
113232		false
108019		false
113220		false
116603		false
114952		false
109681		false
110805		false
112231		false
108581		false
116606		false
116604		false
108583		false
116995		false
111109		false
112226		false
109687		false
109676		false
116602		false
114944		false
108573		false
108596		false
108599		false
113229		false
117555		false
107283		false
110788		false
113214		false
107354		false
112215		false
114930		false
107982		false
114947		false
116605		false
114937		false
117857		false
108012		false
116608		false
114943		false
113221		false
114946		false
117859		false
114933		false
114948		false
116610		false
108036		false
111094		false
118328		false
108577		false
110798		false
118335		false
110811		false
112225		false
113210		false
111098		false
118332		false
118334		false
110800		false
114934		false
108630		false
113212		false
112216		false
120755		false
118329		false
120757		false
111108		false
113215		false
118340		false
107988		false
118331		false
118333		false
113228		false
113230		false
118043		false
108562		false
107280		false
116607		false
114938		false
114939		false
123043		false
114940		false
110803		false
118336		false
112228		false
116601		false
118045		false
111117		false
113211		false
118337		false
118338		false
118044		false
114932		false
123850		false
118330		false
113224		false
117858		false
111111		false
112229		false
114949		false
114953		false
126103		false
112232		false
126100		false
110797		false
114931		false
123853		false
105814		false
109672		false
110802		false
110796		false
110792		false
110790		false
111107		false
111103		false
113226		false
113225		false
113223		false
113222		false
113213		false
114951		false
114950		false
114945		false
114942		false
114941		false
114935		false
116609		false
116600		false
116599		false
117554		false
117553		false
118339		false
120178		false
120177		false
120176		false
120175		false
120174		false
120756		false
120754		false
122678		false
122677		false
123042		false
123855		false
123854		false
123852		false
123851		false
123849		false
126110		false
126109		false
126108		false
126107		false
126106		false
126105		false
126104		false
126102		false
126101		false
128158		false
128585		false
