# Supplementary material for: A systems-based framework to computationally describe putative transcription factors and signaling pathways regulating glycan biosynthesis
Source: publisher site journal article supplement (doi:10.3762/bjoc.17.119), 2021-07-22
Supplement: Additional file 2 [file 1860-5397-17-119-S2.cys › CytoscapeSession-2021_03_21-12_01/tables/105658-Cistrome+Cancer+TF%2DGlycogene+Networks/SHARED_ATTRS-org.cytoscape.model.CyEdge-105658+shared+edge.cytable]

CyCSV-Version	1
SUID	BP	clst	cor	ctype	RP	shared interaction	shared name
java.lang.Long	java.lang.Double	java.lang.Integer	java.lang.Double	java.lang.String	java.lang.Double	java.lang.String	java.lang.String
	mutable	mutable	mutable	mutable	mutable
105658 shared edge
106033	0.522522302568216	2	0.610949086746314	BRCA_1	0.8552632517236	interacts with	ADNP (interacts with) FUT7
106034	0.554197064503012	4	0.70094941048086	BRCA_1	0.790637749624222	interacts with	AFF4 (interacts with) MAN1A2
106035	0.572287401063607	4	0.595329742950403	BRCA_1	0.961294824994632	interacts with	AFF4 (interacts with) STT3B
106036	0.443108361263256	4	0.551752844492777	BRCA_1	0.803092119390165	interacts with	AFF4 (interacts with) NEU3
106037	0.489628623575534	4	0.504078810653534	BRCA_1	0.971333476487009	interacts with	AFF4 (interacts with) FUT11
106038	0.442572872058661	4	0.545759794830447	BRCA_1	0.810929783122182	interacts with	AFF4 (interacts with) ACER2
106039	0.432627536995852	4	0.475877517517492	BRCA_1	0.909115310285592	interacts with	AFF4 (interacts with) COG5
106040	0.367591070590223	4	0.551816138524834	BRCA_1	0.666147734593086	interacts with	AR (interacts with) MAN2A1
106041	0.404774795625338	4	0.439966442578411	BRCA_1	0.920012883830792	interacts with	AR (interacts with) ACER2
106042	0.431299313436999	4	0.455301122673944	BRCA_1	0.947283659007945	interacts with	AR (interacts with) FUT11
106043	0.305299382021747	4	0.463007155279744	BRCA_1	0.659383723427099	interacts with	AR (interacts with) SLC35A3
106044	0.328392566725024	4	0.59826862913973	BRCA_1	0.54890487438265	interacts with	AR (interacts with) NEU3
106045	0.365448667599611	4	0.411956295312893	BRCA_1	0.887105432681984	interacts with	AR (interacts with) SLC35F5
106046	0.272373174096352	4	0.448252273793343	BRCA_1	0.607633669744471	interacts with	AR (interacts with) GALNT10
106047	0.249802798542144	4	0.412017578470255	BRCA_1	0.606291604036934	interacts with	AR (interacts with) ST8SIA6
106048	0.444091307245608	4	0.45978863795245	BRCA_1	0.965859681142305	interacts with	ARID2 (interacts with) RTF1
106049	0.363102392893273	4	0.419256888044126	BRCA_1	0.866061842387803	interacts with	ATF1 (interacts with) SLC35A5
106050	0.264457131452928	4	0.44325242439312	BRCA_1	0.596628730942667	interacts with	ATF1 (interacts with) SLC35A3
106051	0.284727442577539	4	0.413688698255549	BRCA_1	0.688264977453296	interacts with	ATF1 (interacts with) SLC35F5
106052	0.25872474082255	4	0.406779580692308	BRCA_1	0.636031780115955	interacts with	ATF1 (interacts with) MAN2A1
106053	0.309206289233517	4	0.406513851072197	BRCA_1	0.760629160403693	interacts with	ATF1 (interacts with) GALNT4
106054	0.535186988265258	4	0.729241695370142	BRCA_1	0.733895211509556	interacts with	ATF2 (interacts with) MAN1A2
106055	0.542848508831597	4	0.623016574611237	BRCA_1	0.871322739961348	interacts with	ATF2 (interacts with) MAN2A1
106056	0.571323471957255	4	0.599854223628663	BRCA_1	0.952437191324887	interacts with	ATF2 (interacts with) FUT11
106057	0.524198858669781	4	0.555732533111415	BRCA_1	0.943257461885334	interacts with	ATF2 (interacts with) SLC35F5
106058	0.470232164930079	4	0.694480676152978	BRCA_1	0.677098990766588	interacts with	ATF2 (interacts with) UGGT1
106059	0.428791233807969	2	0.461840017541188	BRCA_1	0.928441056474125	interacts with	ATF3 (interacts with) B3GNT5
106060	0.325954502146438	2	0.450336013200611	BRCA_1	0.723802877388877	interacts with	ATF3 (interacts with) HAS1
106061	0.311175737478531	2	0.423231720046004	BRCA_1	0.735237277217093	interacts with	ATF3 (interacts with) HAS2
106062	0.561577288341003	4	0.612758349704477	BRCA_1	0.916474314241237	interacts with	ATF7IP (interacts with) ALG10
106063	0.568724018666157	4	0.607358389344866	BRCA_1	0.936389500241559	interacts with	ATRX (interacts with) FKTN
106064	0.475305404480928	4	0.576995052112788	BRCA_1	0.823759931286236	interacts with	BACH1 (interacts with) CSGALNACT2
106065	0.434958990364703	4	0.463312904420957	BRCA_1	0.938801803736311	interacts with	BACH1 (interacts with) MAN1A2
106066	0.45188182888984	4	0.503357932701067	BRCA_1	0.897734593085677	interacts with	BACH1 (interacts with) FUT11
106067	0.388368913146891	4	0.45391743720042	BRCA_1	0.855593729869014	interacts with	BACH1 (interacts with) MAN1A1
106068	0.307160654814673	4	0.445761037541892	BRCA_1	0.689070216877818	interacts with	BACH1 (interacts with) CHSY1
106069	0.352275324340797	4	0.503891940552897	BRCA_1	0.699108868370195	interacts with	BACH1 (interacts with) B3GNT5
106070	0.328465039980041	4	0.470448005900984	BRCA_1	0.69819626368907	interacts with	BACH1 (interacts with) CHST11
106071	0.375221632862954	4	0.45100197296239	BRCA_1	0.831973373416362	interacts with	BACH1 (interacts with) GFPT2
106072	0.315649823109576	4	0.491591414169817	BRCA_1	0.642097917114022	interacts with	BACH1 (interacts with) ST6GAL2
106073	0.383533999639558	1	0.455061869126477	BRCA_1	0.842817264333262	interacts with	BATF (interacts with) DPM3
106074	0.578515200662947	2	0.589850565001918	BRCA_1	0.980782650705889	interacts with	BATF3 (interacts with) MGAT1
106075	0.474193204366005	2	0.502488350633351	BRCA_1	0.943689945783456	interacts with	BATF3 (interacts with) CHST11
106076	0.412173739658983	2	0.42110258835731	BRCA_1	0.97879650008052	interacts with	BATF3 (interacts with) B3GNT5
106077	0.425303209701294	2	0.44664149577346	BRCA_1	0.95222502549788	interacts with	BATF3 (interacts with) HAS1
106078	0.392559150460793	2	0.41100345157838	BRCA_1	0.955123731815986	interacts with	BCAT1 (interacts with) B3GNT5
106079	0.378622590739624	4	0.414345060527419	BRCA_1	0.91378569894782	interacts with	BMI1 (interacts with) ALG10B
106080	0.395050545806894	4	0.425917442255517	BRCA_1	0.927528451793	interacts with	BMI1 (interacts with) GALNT4
106081	0.553118730924386	4	0.556464448026543	BRCA_1	0.993987545630234	interacts with	BRCA1 (interacts with) PIGW
106082	0.322218587790381	4	0.414665827520498	BRCA_1	0.777056044663947	interacts with	BRCA1 (interacts with) ALG10
106083	0.317348949274077	4	0.40941728839099	BRCA_1	0.775123470045093	interacts with	BRCA1 (interacts with) PIGN
106084	0.32407942979894	4	0.433844888127535	BRCA_1	0.746993772815117	interacts with	BRCA1 (interacts with) FAM20B
106085	0.310518515482591	4	0.409597713242438	BRCA_1	0.758106076873524	interacts with	BRCA1 (interacts with) SLC35E3
106086	0.549949833644498	1	0.5672147445396	BRCA_1	0.96956194975306	interacts with	BRD1 (interacts with) ALG12
106087	0.391509068805007	1	0.451748695100326	BRCA_1	0.86665235129912	interacts with	BRD1 (interacts with) PMM1
106088	0.42098694496078	1	0.432478537425519	BRCA_1	0.97342852541736	interacts with	C17orf49 (interacts with) HYAL2
106089	0.411090827007409	4	0.422219154058938	BRCA_1	0.973643244403886	interacts with	CASP8AP2 (interacts with) ALG10B
106090	0.474292358676478	4	0.4905664510457	BRCA_1	0.966825916581674	interacts with	CASP8AP2 (interacts with) ALG10
106091	0.429252305508489	4	0.43759117868653	BRCA_1	0.980943689945783	interacts with	CASP8AP2 (interacts with) SLC35A5
106092	0.293572634226658	8	0.404637146161612	BRCA_1	0.725520721494524	interacts with	CBFB (interacts with) GALNS
106093	0.214199593152574	9	0.41224403566961	BRCA_1	0.519594159330041	interacts with	CBX3 (interacts with) CMAS
106094	0.388376726569281	1	0.418042990654599	BRCA_1	0.92903537495303	interacts with	CBX4 (interacts with) RFNG
106095	0.509158150370401	2	0.583739415626528	BRCA_1	0.872235344642474	interacts with	CBX7 (interacts with) ST6GALNAC6
106096	0.396974157498975	2	0.519336653268552	BRCA_1	0.764386944384797	interacts with	CBX7 (interacts with) ST3GAL3
106097	0.367808456729025	2	0.410763545080832	BRCA_1	0.895426240068714	interacts with	CBX7 (interacts with) MAN2A2
106098	0.42714415345626	2	0.46517633970086	BRCA_1	0.918241357096844	interacts with	CBX7 (interacts with) IDUA
106099	0.278555241213976	2	0.520036784258764	BRCA_1	0.535645265192184	interacts with	CBX7 (interacts with) MGAT3
106100	0.431866789943182	2	0.433823045894176	BRCA_1	0.995490659222676	interacts with	CBX7 (interacts with) HYAL1
106101	0.417751123351198	1	0.419394660511243	BRCA_1	0.996081168133992	interacts with	CBX8 (interacts with) RFNG
106102	0.490041602310506	1	0.512146261660688	BRCA_1	0.956839166845609	interacts with	CBX8 (interacts with) GALK1
106103	0.433357477054376	1	0.435672895599812	BRCA_1	0.994685419798153	interacts with	CBX8 (interacts with) B3GAT3
106104	0.420566161238137	1	0.448441818883021	BRCA_1	0.937838853400612	interacts with	CCDC101 (interacts with) B3GAT3
106105	0.353990927286777	4	0.420303588087073	BRCA_1	0.842226755421945	interacts with	CDK8 (interacts with) STT3B
106106	0.295349730345468	4	0.449675094145923	BRCA_1	0.656806957268628	interacts with	CDK8 (interacts with) UGGT1
106107	0.549383708644621	1	0.660252885460129	BRCA_1	0.832080738672965	interacts with	CDK9 (interacts with) DPM2
106108	0.471999785502459	1	0.509852827158005	BRCA_1	0.925756925059051	interacts with	CDK9 (interacts with) PIGQ
106109	0.412423562524172	1	0.421358313097147	BRCA_1	0.978795361820915	interacts with	CDK9 (interacts with) MAN1B1
106110	0.406365559427169	1	0.413423137138684	BRCA_1	0.982928924200129	interacts with	CDK9 (interacts with) RFNG
106111	0.34022811024178	1	0.411329779178601	BRCA_1	0.827141936869229	interacts with	CDK9 (interacts with) DPM3
106112	0.304877248235048	1	0.461165520107387	BRCA_1	0.661101567532746	interacts with	CDK9 (interacts with) ST6GALNAC6
106113	0.31394286955972	1	0.525721662545709	BRCA_1	0.597165557225682	interacts with	CDK9 (interacts with) POMT1
106114	0.419918818982855	1	0.422413206610467	BRCA_1	0.994094910886837	interacts with	CDK9 (interacts with) MOGS
106115	0.279798328833058	1	0.411761990006494	BRCA_1	0.679514709040155	interacts with	CDK9 (interacts with) CHST12
106116	0.260853914126018	1	0.449093041805866	BRCA_1	0.580846038222031	interacts with	CDK9 (interacts with) IDUA
106117	0.430797999810251	2	0.441122753983364	BRCA_1	0.976594374060554	interacts with	CEBPA (interacts with) MGAT1
106118	0.470374699247796	2	0.479801768567952	BRCA_1	0.980352158041658	interacts with	CEBPA (interacts with) NAGK
106119	0.349445054935681	2	0.539622190445318	BRCA_1	0.647573545200773	interacts with	CEBPA (interacts with) MFNG
106120	0.371635247032727	2	0.433733561915021	BRCA_1	0.856828430319948	interacts with	CEBPA (interacts with) FUT7
106121	0.357587606974009	1	0.40253456264877	BRCA_1	0.888340133132918	interacts with	CEBPB (interacts with) CHST12
106122	0.315106618714538	1	0.422106004128751	BRCA_1	0.746510629160404	interacts with	CEBPB (interacts with) A4GALT
106123	0.258115106520228	4	0.405239629520337	BRCA_1	0.63694438479708	interacts with	CHD1 (interacts with) SLC35A3
106124	0.291815457549374	4	0.421586656059387	BRCA_1	0.692183809319304	interacts with	CHD1 (interacts with) ACER2
106125	0.299282874562283	4	0.460480828227158	BRCA_1	0.649935580846038	interacts with	CHD1 (interacts with) ALG10
106126	0.322089151927094	4	0.51206594880071	BRCA_1	0.62899935580846	interacts with	CHD2 (interacts with) OGT
106127	0.413369866532843	4	0.467418591342345	BRCA_1	0.884367618638609	interacts with	CHD2 (interacts with) NDST2
106128	0.408500804063236	4	0.427261887535457	BRCA_1	0.956089967255355	interacts with	CHD4 (interacts with) NEU3
106129	0.424419371435715	4	0.504858496239113	BRCA_1	0.840669959201202	interacts with	CHD8 (interacts with) NEU3
106130	0.324826539334686	4	0.411903932928968	BRCA_1	0.788597809748765	interacts with	CHD8 (interacts with) STT3B
106131	0.411881508895589	4	0.413903476706427	BRCA_1	0.995114880824565	interacts with	CHD8 (interacts with) FUT11
106132	0.363311547828707	4	0.447485289139987	BRCA_1	0.811896070431608	interacts with	CHD8 (interacts with) ALG10
106133	0.308053327989574	4	0.482950462362378	BRCA_1	0.637856989478205	interacts with	CHD8 (interacts with) ACER2
106134	0.30798606854663	4	0.507758605618783	BRCA_1	0.606560017178441	interacts with	CHD8 (interacts with) FKTN
106135	0.637772668436541	2	0.724019091208233	BRCA_1	0.880878247799012	interacts with	CIITA (interacts with) FUT7
106136	0.605718461914371	2	0.65505506580789	BRCA_1	0.924683272493021	interacts with	CIITA (interacts with) LAMP3
106137	0.469522870744753	2	0.53155901520805	BRCA_1	0.883293966072579	interacts with	CIITA (interacts with) MAN2B1
106138	0.545522541899468	2	0.558566146897339	BRCA_1	0.976648056688855	interacts with	CIITA (interacts with) GAL3ST4
106139	0.461765410475184	2	0.487545545901022	BRCA_1	0.947122611123041	interacts with	CIITA (interacts with) DSE
106140	0.505192315257319	1	0.67576636856336	BRCA_1	0.747584281726433	interacts with	CPSF3L (interacts with) B3GALT6
106141	0.45267388041947	1	0.571533756571363	BRCA_1	0.79203349796006	interacts with	CPSF3L (interacts with) RFNG
106142	0.360081692362265	1	0.506922745263321	BRCA_1	0.710328537685205	interacts with	CPSF3L (interacts with) PIGQ
106143	0.491689558736854	1	0.513494034879751	BRCA_1	0.957537041013528	interacts with	CPSF3L (interacts with) B3GAT3
106144	0.368165344109012	1	0.506101692130667	BRCA_1	0.727453296113378	interacts with	CPSF3L (interacts with) MOGS
106145	0.455200781354828	1	0.470376665838894	BRCA_1	0.967736740390809	interacts with	CPSF3L (interacts with) B4GALT7
106146	0.368568193133087	1	0.458568548068605	BRCA_1	0.803736310929783	interacts with	CPSF3L (interacts with) POMGNT1
106147	0.385719017825379	1	0.428096631556909	BRCA_1	0.901009233412068	interacts with	CPSF3L (interacts with) ST3GAL3
106148	0.387809816276051	1	0.411373000261391	BRCA_1	0.942720635602319	interacts with	CPSF3L (interacts with) PMM1
106149	0.387710178104983	1	0.479757220522095	BRCA_1	0.808138286450505	interacts with	CPSF3L (interacts with) B4GALNT4
106150	0.498421693087671	4	0.524078439946391	BRCA_1	0.951044071071985	interacts with	CREB1 (interacts with) FUT11
106151	0.451544608013796	10	0.45459492556685	BRCA_1	0.993290031671051	interacts with	CREB3 (interacts with) GMPPA
106152	0.523340002033959	1	0.555642362811502	BRCA_1	0.941864834397982	interacts with	CREB3L4 (interacts with) B4GALT3
106153	0.239454770487524	4	0.415593353642187	BRCA_1	0.576175649559802	interacts with	CREBBP (interacts with) MAN1A2
106154	0.271801154440782	4	0.406121112129854	BRCA_1	0.669261327034572	interacts with	CREBBP (interacts with) NEU3
106155	0.342238316704875	4	0.439367013341034	BRCA_1	0.778934936654499	interacts with	CREBBP (interacts with) ACER2
106156	0.25564781796843	4	0.428525830389266	BRCA_1	0.596575048314365	interacts with	CREBBP (interacts with) COG7
106157	0.215322022699119	4	0.404295800709525	BRCA_1	0.532585355378999	interacts with	CREBBP (interacts with) POFUT1
106158	0.476444782690238	1	0.498270356298009	BRCA_1	0.956197326748618	interacts with	CTBP1 (interacts with) B3GAT3
106159	0.466032794931259	1	0.492440438841431	BRCA_1	0.946373933115036	interacts with	CTBP1 (interacts with) DPM3
106160	0.44771531979851	1	0.477910193245842	BRCA_1	0.936818938214612	interacts with	CTBP1 (interacts with) CHST12
106161	0.457340142081671	1	0.468068866434427	BRCA_1	0.977078748188309	interacts with	CTBP1 (interacts with) B4GALT7
106162	0.480358823958113	1	0.499057750907127	BRCA_1	0.962531536851146	interacts with	CTBP1 (interacts with) MOGS
106163	0.23818405218379	4	0.42183804184062	BRCA_1	0.564633884474984	interacts with	CTNNB1 (interacts with) STT3B
106164	0.28659468146342	4	0.490642930456814	BRCA_1	0.584120678548422	interacts with	CTNNB1 (interacts with) MAN2A1
106165	0.230737446246777	4	0.401773896867167	BRCA_1	0.574296757569251	interacts with	CTNNB1 (interacts with) CHSY1
106166	0.435994174776866	4	0.461275299972639	BRCA_1	0.945192978689141	interacts with	DEK (interacts with) ALG10
106167	0.397671101703645	3	0.40351984325828	BRCA_1	0.9855056903586	interacts with	E2F1 (interacts with) PIGW
106168	0.428724159126783	3	0.430666179692284	BRCA_1	0.995490659222676	interacts with	E2F1 (interacts with) ALG3
106169	0.319464924890685	3	0.438443425982737	BRCA_1	0.72863431393601	interacts with	E2F1 (interacts with) SLC35B1
106170	0.302953250395723	3	0.401809408926417	BRCA_1	0.75397251449431	interacts with	E2F1 (interacts with) DPM1
106171	0.402049145188469	3	0.433162028720115	BRCA_1	0.928172643332618	interacts with	E2F1 (interacts with) KHK
106172	0.253058387897251	11	0.40084792940051	BRCA_1	0.631307708825424	interacts with	E2F6 (interacts with) FUT1
106173	0.411434101042054	3	0.428886090330799	BRCA_1	0.959308567747477	interacts with	E2F7 (interacts with) PIGW
106174	0.601427930504357	2	0.616825386193644	BRCA_1	0.975037577839811	interacts with	EBF1 (interacts with) CSGALNACT1
106175	0.482913438613355	2	0.552087365563371	BRCA_1	0.874704745544342	interacts with	EBF1 (interacts with) ST3GAL2
106176	0.469357978168541	2	0.518392056049068	BRCA_1	0.905411208932789	interacts with	EBF1 (interacts with) HAS2
106177	0.514532340619757	2	0.554574347107842	BRCA_1	0.927796864934507	interacts with	EBF1 (interacts with) CHST3
106178	0.405807738216726	2	0.557641380016315	BRCA_1	0.727721709254885	interacts with	EBF1 (interacts with) HYAL1
106179	0.420312569584968	2	0.576552470267215	BRCA_1	0.729010092334121	interacts with	EBF1 (interacts with) B3GALT2
106180	0.338531103788783	2	0.420074433878061	BRCA_1	0.805883616061842	interacts with	EBF1 (interacts with) HAS1
106181	0.470231192744907	2	0.488645914228056	BRCA_1	0.96231479493236	interacts with	EBF1 (interacts with) TPST1
106182	0.382724952770291	2	0.449407489927192	BRCA_1	0.851621215374705	interacts with	EBF1 (interacts with) FUT4
106183	0.422189092945843	2	0.437185970503928	BRCA_1	0.965696800515353	interacts with	EBF1 (interacts with) ST3GAL6
106184	0.450336376206265	2	0.55951884319151	BRCA_1	0.804863646124114	interacts with	EBF1 (interacts with) GALNT12
106185	0.421843790885525	1	0.42828099517175	BRCA_1	0.984969670943153	interacts with	EGLN2 (interacts with) B3GAT3
106186	0.402820426499458	1	0.421273324272071	BRCA_1	0.956197326748618	interacts with	EGLN2 (interacts with) MOGS
106187	0.400071389752365	2	0.500102660603077	BRCA_1	0.799978526948679	interacts with	EGR1 (interacts with) B3GNT5
106188	0.360414438196699	2	0.479351717458811	BRCA_1	0.751878891990552	interacts with	EGR1 (interacts with) CHST3
106189	0.358015909799669	2	0.470983076818378	BRCA_1	0.76014601674898	interacts with	EGR1 (interacts with) HAS2
106190	0.463999133893312	2	0.463999133893312	BRCA_1	1.0	interacts with	EGR1 (interacts with) CSGALNACT1
106191	0.445554894882409	2	0.445554894882409	BRCA_1	1.0	interacts with	EGR1 (interacts with) ST6GALNAC3
106192	0.318075687108315	2	0.413909458571686	BRCA_1	0.76846682413571	interacts with	EGR1 (interacts with) GFPT2
106193	0.385192148526804	2	0.46608375074747	BRCA_1	0.82644406270131	interacts with	EGR2 (interacts with) GFPT2
106194	0.423101087759281	2	0.477668306835145	BRCA_1	0.885763366974447	interacts with	EGR2 (interacts with) TPST1
106195	0.465307281520077	2	0.472691500253913	BRCA_1	0.984378355164269	interacts with	EGR2 (interacts with) CSGALNACT1
106196	0.436916349696268	2	0.518796389733687	BRCA_1	0.842173072793644	interacts with	EGR2 (interacts with) MGAT3
106197	0.545983632452053	2	0.582040923962278	BRCA_1	0.93805024694009	interacts with	EGR2 (interacts with) B3GNT5
106198	0.462953774626064	2	0.526232787023085	BRCA_1	0.879750912604681	interacts with	EGR2 (interacts with) HPSE2
106199	0.360331951954458	2	0.409209510516835	BRCA_1	0.880556152029203	interacts with	EGR2 (interacts with) B3GALT1
106200	0.386281161431755	4	0.407939535979972	BRCA_1	0.946907880609835	interacts with	EHF (interacts with) MAN2A1
106201	0.31298749545425	4	0.411281818941998	BRCA_1	0.761004938801804	interacts with	EHF (interacts with) UAP1
106202	0.446558752974872	1	0.446558752974872	BRCA_1	1.0	interacts with	EHMT2 (interacts with) MOGS
106203	0.509756831101214	4	0.632291267129672	BRCA_1	0.806205711831651	interacts with	ELF1 (interacts with) COG3
106204	0.384053953372621	4	0.654662979815628	BRCA_1	0.586643762078591	interacts with	ELF1 (interacts with) COG6
106205	0.317895501215918	4	0.450186817443372	BRCA_1	0.70614129267769	interacts with	ELF1 (interacts with) SLC35A5
106206	0.246505941779636	4	0.40809746564798	BRCA_1	0.604036933648271	interacts with	ELF1 (interacts with) MAN1A2
106207	0.356264049859657	4	0.443615422512413	BRCA_1	0.803092119390165	interacts with	ELF1 (interacts with) UGGT1
106208	0.465380176047341	4	0.497479043988404	BRCA_1	0.935476944548822	interacts with	ELF2 (interacts with) ALG10B
106209	0.498482650966572	4	0.530732885915087	BRCA_1	0.939234526813033	interacts with	ELK3 (interacts with) FUT11
106210	0.489668207198056	4	0.583330521435403	BRCA_1	0.839435258750268	interacts with	ELK4 (interacts with) ALG10
106211	0.542378183994894	4	0.611661267190754	BRCA_1	0.886729654283874	interacts with	ELK4 (interacts with) FUT11
106212	0.512422231417044	4	0.602689817327737	BRCA_1	0.850225467038866	interacts with	ELK4 (interacts with) UGGT1
106213	0.433458098510818	4	0.486208072442916	BRCA_1	0.891507408202706	interacts with	ELK4 (interacts with) ACER2
106214	0.439647587016901	4	0.478010579055089	BRCA_1	0.919744470689285	interacts with	ELK4 (interacts with) SLC35A3
106215	0.436054164332436	4	0.509044116888175	BRCA_1	0.856613699806743	interacts with	ELK4 (interacts with) SLC35F5
106216	0.412920691644791	1	0.418332584547031	BRCA_1	0.987063181061785	interacts with	ELL (interacts with) HYAL2
106217	0.356098412636905	4	0.451774244405113	BRCA_1	0.788222031350655	interacts with	EP400 (interacts with) FKTN
106218	0.354460624741063	4	0.432721182100827	BRCA_1	0.819143225252308	interacts with	EP400 (interacts with) OGT
106219	0.431151874681359	4	0.463017244411642	BRCA_1	0.931178870517501	interacts with	EP400 (interacts with) ACER2
106220	0.398923311965981	4	0.589445820203244	BRCA_1	0.676776894996779	interacts with	ERCC6 (interacts with) MAN1A2
106221	0.327926794599009	4	0.491204593904016	BRCA_1	0.667597165557226	interacts with	ERCC6 (interacts with) STT3B
106222	0.392407961813714	4	0.442025489064876	BRCA_1	0.887749624221602	interacts with	ERCC6 (interacts with) COG5
106223	0.397733200892956	4	0.536843277025867	BRCA_1	0.740873953188748	interacts with	ERCC6 (interacts with) ACER2
106224	0.357028732290367	4	0.497250932718128	BRCA_1	0.718005153532317	interacts with	ERCC6 (interacts with) MAN2A1
106225	0.414310220035425	4	0.520943015782646	BRCA_1	0.795308138286451	interacts with	ERCC6 (interacts with) UGGT1
106226	0.376378155566348	4	0.498094080839011	BRCA_1	0.755636675971656	interacts with	ERCC6 (interacts with) SLC35F5
106227	0.328630606283396	4	0.473671536199868	BRCA_1	0.693794288168349	interacts with	ERCC6 (interacts with) SLC35A3
106228	0.318233884023531	4	0.458686226523548	BRCA_1	0.693794288168349	interacts with	ERCC6 (interacts with) SLC35A5
106229	0.318386254285214	4	0.412498201754414	BRCA_1	0.771848829718703	interacts with	ERCC6 (interacts with) RTF1
106230	0.335346207312593	4	0.528720198884382	BRCA_1	0.634260253382006	interacts with	ERCC6 (interacts with) FUT11
106231	0.461523318378757	1	0.474095279739612	BRCA_1	0.973482205163992	interacts with	ERF (interacts with) PIGQ
106232	0.475791115797578	1	0.487863974911552	BRCA_1	0.975253636802834	interacts with	ERF (interacts with) CHST12
106233	0.460895852653278	1	0.502341963437744	BRCA_1	0.917494229427237	interacts with	ERF (interacts with) RFNG
106234	0.404721344385446	1	0.413670247150031	BRCA_1	0.978367062107467	interacts with	ERF (interacts with) B4GALT7
106235	0.502242913992933	1	0.516322677819897	BRCA_1	0.972730688711149	interacts with	ERF (interacts with) HYAL2
106236	0.660094212916502	2	0.66714963909764	BRCA_1	0.989424522224608	interacts with	ERG (interacts with) MFNG
106237	0.323260076243103	2	0.446679675117315	BRCA_1	0.723695512132274	interacts with	ERG (interacts with) CHSY3
106238	0.473186614269642	2	0.706404892660273	BRCA_1	0.669851835945888	interacts with	ERG (interacts with) ST6GALNAC3
106239	0.474160012489803	2	0.500206858798281	BRCA_1	0.947927850547563	interacts with	ERG (interacts with) ST8SIA4
106240	0.447418011663316	2	0.67344074994055	BRCA_1	0.664376207859137	interacts with	ERG (interacts with) CSGALNACT1
106241	0.322092659352071	2	0.573553394360997	BRCA_1	0.561573974661799	interacts with	ERG (interacts with) CHST7
106242	0.397797777652362	2	0.605357160534939	BRCA_1	0.657129053038437	interacts with	ERG (interacts with) CHST3
106243	0.304057772106703	2	0.513088882942627	BRCA_1	0.592602533820056	interacts with	ERG (interacts with) B3GALT2
106244	0.445800878860497	2	0.465127073564094	BRCA_1	0.958449645694653	interacts with	ERG (interacts with) ST3GAL6
106245	0.373473163310304	2	0.416141768521614	BRCA_1	0.89746617994417	interacts with	ERG (interacts with) UST
106246	0.317749989132714	2	0.481027777128338	BRCA_1	0.660564741249732	interacts with	ERG (interacts with) SULT1C4
106247	0.417113218124477	2	0.428996523146133	BRCA_1	0.972299763796435	interacts with	ERG (interacts with) FUT4
106248	0.485098683149655	2	0.645458447836555	BRCA_1	0.751556796220743	interacts with	ERG (interacts with) CHST2
106249	0.422033977214438	2	0.532019281826525	BRCA_1	0.793268198410994	interacts with	ERG (interacts with) GALNT12
106250	0.46702343292816	2	0.481471719994785	BRCA_1	0.969991410779472	interacts with	ERG (interacts with) GFPT2
106251	0.330456908690097	2	0.468153570239495	BRCA_1	0.705872879536182	interacts with	ERG (interacts with) HAS2
106252	0.283597702312115	2	0.42572793929165	BRCA_1	0.666147734593086	interacts with	ERG (interacts with) TPST1
106253	0.606985550083723	2	0.627395784427899	BRCA_1	0.967468327249302	interacts with	ETS1 (interacts with) CHST11
106254	0.667018897839619	2	0.677715066486115	BRCA_1	0.984217307279364	interacts with	ETS1 (interacts with) MFNG
106255	0.666930676921368	2	0.732695485355699	BRCA_1	0.910242645479923	interacts with	ETS1 (interacts with) ST8SIA4
106256	0.597384733529436	2	0.631739018801382	BRCA_1	0.945619497530599	interacts with	ETS1 (interacts with) ST6GALNAC3
106257	0.404133892427305	2	0.541208206192368	BRCA_1	0.74672535967361	interacts with	ETS1 (interacts with) GFPT2
106258	0.56157783349515	2	0.674733738541516	BRCA_1	0.832295469186171	interacts with	ETS1 (interacts with) CSGALNACT1
106259	0.410378875626275	2	0.51506115720026	BRCA_1	0.79675756925059	interacts with	ETS1 (interacts with) ST8SIA1
106260	0.35867437692709	2	0.480226140544659	BRCA_1	0.746886407558514	interacts with	ETS1 (interacts with) HS3ST3B1
106261	0.572519917603101	2	0.60479193745665	BRCA_1	0.946639467468327	interacts with	ETS1 (interacts with) CHST3
106262	0.474423751167799	2	0.573607167959613	BRCA_1	0.827088254240928	interacts with	ETS1 (interacts with) FUT4
106263	0.462500196846243	2	0.680149496080509	BRCA_1	0.679997852694868	interacts with	ETS1 (interacts with) CHST2
106264	0.569839565340093	2	0.648995562677626	BRCA_1	0.878033068499034	interacts with	ETS1 (interacts with) B3GNT5
106265	0.395547197827325	2	0.596619692398981	BRCA_1	0.662980459523298	interacts with	ETS1 (interacts with) B3GALT2
106266	0.397418446786225	2	0.586803331224937	BRCA_1	0.677260038651492	interacts with	ETS1 (interacts with) GALNT12
106267	0.40680384883013	2	0.471352994713421	BRCA_1	0.86305561520292	interacts with	ETS1 (interacts with) HYAL1
106268	0.446891754834196	2	0.468865086401093	BRCA_1	0.953135065492807	interacts with	ETS1 (interacts with) ST3GAL6
106269	0.489514600543349	2	0.61968589731033	BRCA_1	0.789939875456302	interacts with	ETV1 (interacts with) ARSB
106270	0.389663494535697	2	0.457699197692854	BRCA_1	0.851352802233197	interacts with	ETV1 (interacts with) EXTL2
106271	0.442983079153578	2	0.495668476602166	BRCA_1	0.893708395963066	interacts with	ETV1 (interacts with) CSGALNACT2
106272	0.282647371751561	2	0.400209428472794	BRCA_1	0.706248657934292	interacts with	ETV1 (interacts with) ST3GAL6
106273	0.494194751638555	2	0.672942970286769	BRCA_1	0.734378355164269	interacts with	ETV1 (interacts with) CHST3
106274	0.363918148775212	2	0.54731691227068	BRCA_1	0.664913034142152	interacts with	ETV1 (interacts with) TPST1
106275	0.373790489487527	2	0.472450077227144	BRCA_1	0.791174575907236	interacts with	ETV1 (interacts with) SLC35B4
106276	0.405317006013592	2	0.441586453855491	BRCA_1	0.917865578698733	interacts with	ETV1 (interacts with) GAL3ST4
106277	0.345639384568176	4	0.431481735406513	BRCA_1	0.801052179514709	interacts with	EZH1 (interacts with) OGT
106278	0.412598882595857	4	0.421953993137284	BRCA_1	0.977829074511488	interacts with	EZH1 (interacts with) NDST2
106279	0.400509195658295	3	0.406089686274336	BRCA_1	0.986257984862311	interacts with	FANCD2 (interacts with) PIGW
106280	0.555594421864848	2	0.84390189909478	BRCA_1	0.658363753489371	interacts with	FLI1 (interacts with) MFNG
106281	0.689580505345652	2	0.759504857422031	BRCA_1	0.907934292462959	interacts with	FLI1 (interacts with) ST8SIA4
106282	0.574221432778059	2	0.582730270744698	BRCA_1	0.985398325101997	interacts with	FLI1 (interacts with) ST3GAL2
106283	0.388948273954821	2	0.547395621579813	BRCA_1	0.710543268198411	interacts with	FLI1 (interacts with) FUT7
106284	0.576897754477416	2	0.604820540882784	BRCA_1	0.953832939660726	interacts with	FLI1 (interacts with) CHST11
106285	0.442305712013058	2	0.572489633364317	BRCA_1	0.772600386514924	interacts with	FLI1 (interacts with) ST8SIA1
106286	0.559492422736335	2	0.648511284346491	BRCA_1	0.862733519433111	interacts with	FLI1 (interacts with) CSGALNACT1
106287	0.469358088710126	2	0.596235848096851	BRCA_1	0.787202061412927	interacts with	FLI1 (interacts with) ST6GALNAC3
106288	0.421078058230239	2	0.44185680873777	BRCA_1	0.952974017607902	interacts with	FLI1 (interacts with) HS3ST3B1
106289	0.529423248468783	2	0.603333920988406	BRCA_1	0.877496242216019	interacts with	FLI1 (interacts with) LAMP3
106290	0.69396338860184	2	0.740683550270732	BRCA_1	0.936922911745759	interacts with	FLI1 (interacts with) CHST2
106291	0.556986602653483	2	0.580190484495279	BRCA_1	0.960006441915396	interacts with	FLI1 (interacts with) ST3GAL6
106292	0.392310814844604	2	0.647295470232532	BRCA_1	0.606076873523728	interacts with	FLI1 (interacts with) B3GNT5
106293	0.412364765251775	2	0.433886740121445	BRCA_1	0.950397251449431	interacts with	FOS (interacts with) B3GNT5
106294	0.391397131283178	6	0.409373709238801	BRCA_1	0.956087610049388	interacts with	FOXA1 (interacts with) GLCE
106295	0.244265465680734	6	0.401073344618838	BRCA_1	0.609029418080309	interacts with	FOXA1 (interacts with) PIGH
106296	0.367402673350894	3	0.418668685335563	BRCA_1	0.87754992484432	interacts with	FOXM1 (interacts with) SLC35B1
106297	0.385159346248607	3	0.404826965069066	BRCA_1	0.951417221387159	interacts with	FOXM1 (interacts with) PIGW
106298	0.376455765928188	3	0.436406621924842	BRCA_1	0.862626154176508	interacts with	FOXM1 (interacts with) RPN2
106299	0.337723424652175	3	0.409337754858528	BRCA_1	0.825048314365471	interacts with	FOXM1 (interacts with) GNPNAT1
106300	0.381704207030606	3	0.405751310691973	BRCA_1	0.940734378355164	interacts with	FOXM1 (interacts with) ALG3
106301	0.380822888681904	2	0.438874583665337	BRCA_1	0.867726003865149	interacts with	FOXO1 (interacts with) CSGALNACT2
106302	0.578741948666193	2	0.656325643477039	BRCA_1	0.881790852480137	interacts with	FOXO1 (interacts with) DSE
106303	0.523811791217866	2	0.583656301400072	BRCA_1	0.89746617994417	interacts with	FOXO1 (interacts with) CSGALNACT1
106304	0.376563702610526	2	0.466367173208489	BRCA_1	0.807440412282585	interacts with	FOXO1 (interacts with) ST6GALNAC3
106305	0.640845009445395	2	0.680053596670207	BRCA_1	0.942344857204209	interacts with	FOXO1 (interacts with) CHST3
106306	0.44502119386515	2	0.628114471838158	BRCA_1	0.708503328322955	interacts with	FOXO1 (interacts with) GFPT2
106307	0.387350147272867	2	0.470222127298727	BRCA_1	0.823759931286236	interacts with	FOXO1 (interacts with) DSEL
106308	0.433058052245125	2	0.486462364905155	BRCA_1	0.89021902512347	interacts with	FOXO1 (interacts with) ST3GAL2
106309	0.416764316871654	2	0.472174047846076	BRCA_1	0.882649774532961	interacts with	FOXO1 (interacts with) UST
106310	0.407438255083948	2	0.487178882836112	BRCA_1	0.836321666308782	interacts with	FOXO1 (interacts with) CHST2
106311	0.434977368626352	2	0.511828590914768	BRCA_1	0.849849688640756	interacts with	FOXO1 (interacts with) FUT4
106312	0.579678412934673	2	0.636801879822321	BRCA_1	0.910296328108224	interacts with	FOXP3 (interacts with) FUT7
106313	0.483531069100525	2	0.485642786175909	BRCA_1	0.99565170710758	interacts with	FOXP3 (interacts with) ST8SIA4
106314	0.422355041786078	2	0.505274530755318	BRCA_1	0.835892205282371	interacts with	FOXP3 (interacts with) HK3
106315	0.497978000872958	2	0.56470044440625	BRCA_1	0.881844535108439	interacts with	FOXP3 (interacts with) CHST11
106316	0.338475516011785	2	0.439749052327209	BRCA_1	0.769701524586644	interacts with	FOXP3 (interacts with) MFNG
106317	0.355035004004052	2	0.432402226517651	BRCA_1	0.821075799871162	interacts with	FOXP3 (interacts with) ST8SIA1
106318	0.376427599523429	2	0.455893200957183	BRCA_1	0.825692505905089	interacts with	FOXP3 (interacts with) GAL3ST4
106319	0.392566225131131	2	0.526625640338666	BRCA_1	0.745436976594374	interacts with	FOXP3 (interacts with) NPL
106320	0.380577453185141	2	0.422566418187566	BRCA_1	0.900633455013958	interacts with	FOXP3 (interacts with) MGAT1
106321	0.380377623899888	4	0.513082865894795	BRCA_1	0.741357096843461	interacts with	GABPA (interacts with) SLC35A5
106322	0.353940626255544	4	0.560122843079456	BRCA_1	0.63189821773674	interacts with	GABPA (interacts with) ALG10B
106323	0.333551128650855	4	0.413234266061993	BRCA_1	0.807171999141078	interacts with	GABPA (interacts with) SLC35A3
106324	0.399668876142739	4	0.402586482711672	BRCA_1	0.9927528451793	interacts with	GABPA (interacts with) FUT11
106325	0.273469025446594	2	0.408056793176798	BRCA_1	0.670173931715697	interacts with	GATA6 (interacts with) MFNG
106326	0.22868201085237	5	0.404240700147841	BRCA_1	0.565707537041014	interacts with	GATAD1 (interacts with) ALG13
106327	0.336760934579425	5	0.429876152219936	BRCA_1	0.783390594803522	interacts with	GATAD1 (interacts with) COG7
106328	0.65242590582964	2	0.66809818599936	BRCA_1	0.976541950721993	interacts with	GLI2 (interacts with) ST3GAL2
106329	0.639153603197755	5	0.693384141274807	BRCA_1	0.921788609157765	interacts with	GLYR1 (interacts with) COG7
106330	0.593015621326324	5	0.621926927303276	BRCA_1	0.953513339417038	interacts with	GLYR1 (interacts with) ALG1
106331	0.328952286934855	12	0.426662247669021	BRCA_1	0.770989907665879	interacts with	GTF2B (interacts with) CTBS
106332	0.376323210405218	1	0.469125929427049	BRCA_1	0.80217951470904	interacts with	GTF2F1 (interacts with) RFNG
106333	0.489251574216266	1	0.494186006100239	BRCA_1	0.990015031135924	interacts with	GTF2F1 (interacts with) B3GAT3
106334	0.470674019960294	1	0.475446865344632	BRCA_1	0.989961348507623	interacts with	GTF2F1 (interacts with) MOGS
106335	0.395882611931112	1	0.458613264617709	BRCA_1	0.863216663087825	interacts with	GTF2F1 (interacts with) DPM3
106336	0.324395108355569	1	0.416775783050385	BRCA_1	0.778344427743182	interacts with	GTF2F1 (interacts with) IDUA
106337	0.345604393068444	1	0.413110795307943	BRCA_1	0.83659007945029	interacts with	GTF2F1 (interacts with) GALK1
106338	0.428245949955276	4	0.477314997652539	BRCA_1	0.897197766802663	interacts with	GTF2I (interacts with) COG5
106339	0.419120475882517	4	0.423301682104724	BRCA_1	0.990122396392527	interacts with	GTF2I (interacts with) SLC35A3
106340	0.392522888349353	4	0.423094338859608	BRCA_1	0.927743182306206	interacts with	GTF2I (interacts with) ALG10B
106341	0.370012265197824	4	0.418468124346128	BRCA_1	0.884206570753704	interacts with	GTF2I (interacts with) POFUT1
106342	0.332789301147326	1	0.475800069212709	BRCA_1	0.699430964140004	interacts with	H2AFX (interacts with) DPM2
106343	0.385902990727161	1	0.456535050886927	BRCA_1	0.84528666523513	interacts with	H2AFX (interacts with) B3GAT3
106344	0.26906133063911	4	0.431480239940198	BRCA_1	0.623577410350011	interacts with	HCFC1 (interacts with) NEU3
106345	0.454653087420859	4	0.457947318723681	BRCA_1	0.992806527807601	interacts with	HCFC1 (interacts with) PIGO
106346	0.307427456208559	4	0.408208614602112	BRCA_1	0.753113592441486	interacts with	HCFC1 (interacts with) NDST2
106347	0.501766661145631	4	0.504883392593819	BRCA_1	0.993826829137366	interacts with	HECTD1 (interacts with) FUT11
106348	0.451753761540423	1	0.462707324815073	BRCA_1	0.976327231735466	interacts with	HES4 (interacts with) GALK1
106349	0.415525440017053	1	0.431724674962503	BRCA_1	0.962477857104515	interacts with	HES4 (interacts with) MOGS
106350	0.437865166774774	13	0.442713171877735	BRCA_1	0.989049331687154	interacts with	HINFP (interacts with) DPAGT1
106351	0.442829907273521	1	0.46683845572672	BRCA_1	0.948572042087181	interacts with	HSF1 (interacts with) TSTA3
106352	0.718484594351249	1	0.754534390775458	BRCA_1	0.952222460811681	interacts with	HSF1 (interacts with) GPAA1
106353	0.361550106958899	1	0.408872959715297	BRCA_1	0.884260253382006	interacts with	HSF1 (interacts with) RFNG
106354	0.444636196054047	1	0.448877252335508	BRCA_1	0.990551857418939	interacts with	HSF1 (interacts with) B3GAT3
106355	0.399374971582122	1	0.419602762020969	BRCA_1	0.951792999785269	interacts with	HSF1 (interacts with) GALK1
106356	0.670673043807453	2	0.742499551886678	BRCA_1	0.90326390380073	interacts with	IKZF1 (interacts with) MFNG
106357	0.587986523003361	2	0.729568570605915	BRCA_1	0.805937298690144	interacts with	IKZF1 (interacts with) ST8SIA4
106358	0.733468377731258	2	0.774724934246874	BRCA_1	0.94674683272493	interacts with	IKZF1 (interacts with) LAMP3
106359	0.416933663351501	2	0.472653376394338	BRCA_1	0.882112948249946	interacts with	IKZF1 (interacts with) MAN2B1
106360	0.39636307674784	2	0.450787678958347	BRCA_1	0.879267768949968	interacts with	IKZF1 (interacts with) GM2A
106361	0.490285010688667	2	0.685765819125131	BRCA_1	0.714945243719132	interacts with	IKZF1 (interacts with) FUT7
106362	0.333664241129594	2	0.440627923136401	BRCA_1	0.7572471548207	interacts with	IKZF1 (interacts with) LIPA
106363	0.550366322037604	2	0.583374521845709	BRCA_1	0.943418509770238	interacts with	IKZF1 (interacts with) DSE
106364	0.4190075826613	2	0.580102062416551	BRCA_1	0.722299763796435	interacts with	IKZF1 (interacts with) NPL
106365	0.496792916680584	4	0.538599502115032	BRCA_1	0.922379086370712	interacts with	INO80 (interacts with) RTF1
106366	0.457034340535893	1	0.478615589962514	BRCA_1	0.954909012829459	interacts with	INTS3 (interacts with) B4GALT3
106367	0.541958577863183	2	0.595224596924437	BRCA_1	0.91051105862143	interacts with	IRF1 (interacts with) LAMP3
106368	0.620876763875372	2	0.647176563005452	BRCA_1	0.959362250375778	interacts with	IRF4 (interacts with) MFNG
106369	0.577409597864366	2	0.612248747097986	BRCA_1	0.943096414000429	interacts with	IRF4 (interacts with) FUT7
106370	0.525171599187166	2	0.539002564719478	BRCA_1	0.974339703671892	interacts with	IRF4 (interacts with) ST8SIA4
106371	0.420415703738891	2	0.471011230483434	BRCA_1	0.892581060768735	interacts with	IRF4 (interacts with) ST8SIA1
106372	0.644268499511292	2	0.746868729161513	BRCA_1	0.862626154176508	interacts with	IRF4 (interacts with) LAMP3
106373	0.497346935592147	2	0.505984637695823	BRCA_1	0.982928924200129	interacts with	IRF4 (interacts with) CHST11
106374	0.453443797208071	2	0.572661088433353	BRCA_1	0.791818767446854	interacts with	IRF4 (interacts with) CHST2
106375	0.43593932984261	2	0.532259149000992	BRCA_1	0.819035859995705	interacts with	IRF4 (interacts with) FUT4
106376	0.335306664056493	2	0.425744157729149	BRCA_1	0.787577839811037	interacts with	IRF5 (interacts with) HK3
106377	0.412717234601035	2	0.419084036312242	BRCA_1	0.984807816190681	interacts with	IRF5 (interacts with) FUT7
106378	0.483068501743876	2	0.489772674376111	BRCA_1	0.986311664608943	interacts with	IRF8 (interacts with) HK3
106379	0.643443953129359	2	0.681334474100314	BRCA_1	0.944387782489667	interacts with	IRF8 (interacts with) ST8SIA4
106380	0.466569549493875	2	0.48586976004927	BRCA_1	0.960276987492619	interacts with	IRF8 (interacts with) LIPA
106381	0.399039303366552	2	0.416081002038257	BRCA_1	0.959042353320092	interacts with	IRF8 (interacts with) GM2A
106382	0.553640324751369	2	0.557019097526099	BRCA_1	0.99393418863063	interacts with	IRF8 (interacts with) DSE
106383	0.476820215398715	2	0.492989443482221	BRCA_1	0.967201674808095	interacts with	JDP2 (interacts with) MGAT1
106384	0.533432932668962	4	0.587801755087692	BRCA_1	0.907504831436547	interacts with	JMJD1C (interacts with) FUT11
106385	0.582797044424657	4	0.586734223830866	BRCA_1	0.993289671462315	interacts with	JMJD1C (interacts with) CSGALNACT2
106386	0.3799915579005	4	0.403194505614634	BRCA_1	0.942452222460812	interacts with	JMJD1C (interacts with) NDST2
106387	0.370405626893451	4	0.56584517121299	BRCA_1	0.654605969508267	interacts with	JMJD1C (interacts with) MGAT5
106388	0.403151503910353	4	0.412496221841264	BRCA_1	0.977345930856775	interacts with	JMJD1C (interacts with) CHSY1
106389	0.516671345884823	1	0.543361024735645	BRCA_1	0.950880395104144	interacts with	JMJD6 (interacts with) GALK1
106390	0.357394609621145	1	0.41745339779425	BRCA_1	0.856130556152029	interacts with	JMJD6 (interacts with) SLC35B1
106391	0.318314587237002	2	0.400971336965842	BRCA_1	0.79385870732231	interacts with	JUN (interacts with) FKRP
106392	0.485258922575376	2	0.488959983217077	BRCA_1	0.992430749409491	interacts with	JUN (interacts with) HYAL2
106393	0.364279471357541	2	0.465322498282128	BRCA_1	0.782853768520507	interacts with	JUN (interacts with) HAS1
106394	0.286101609612199	2	0.405285230711486	BRCA_1	0.705926562164484	interacts with	JUN (interacts with) GBGT1
106395	0.303528283063339	2	0.401828218101335	BRCA_1	0.755368262830148	interacts with	JUN (interacts with) MFNG
106396	0.466493674533899	2	0.502913604329965	BRCA_1	0.927582134421301	interacts with	JUNB (interacts with) HAS1
106397	0.414716083444231	2	0.507244333709727	BRCA_1	0.817586429031565	interacts with	JUNB (interacts with) CHST12
106398	0.361516974451698	2	0.415905274214812	BRCA_1	0.869229117457591	interacts with	JUNB (interacts with) ST3GAL2
106399	0.535745357036625	2	0.543388027380935	BRCA_1	0.985935151385012	interacts with	JUNB (interacts with) HYAL2
106400	0.366738713170567	2	0.479747805403183	BRCA_1	0.764440627013099	interacts with	JUNB (interacts with) MFNG
106401	0.299773285303954	2	0.451429002315445	BRCA_1	0.664054112089328	interacts with	JUNB (interacts with) FKRP
106402	0.348877501035644	2	0.450467185783044	BRCA_1	0.774479278505476	interacts with	JUNB (interacts with) CHST2
106403	0.40194927179309	2	0.446163212666052	BRCA_1	0.900901868155465	interacts with	JUNB (interacts with) GBGT1
106404	0.412315158345505	2	0.420509541180403	BRCA_1	0.980513205926562	interacts with	JUNB (interacts with) HYAL1
106405	0.370616374167832	1	0.44193072705149	BRCA_1	0.838630019325746	interacts with	JUND (interacts with) DPM3
106406	0.373131892819909	1	0.497331203452295	BRCA_1	0.750268413141507	interacts with	JUND (interacts with) RFNG
106407	0.417185997911034	1	0.422608122741135	BRCA_1	0.987169851835946	interacts with	JUND (interacts with) B3GAT3
106408	0.284696916331303	1	0.501497319850546	BRCA_1	0.567693794288168	interacts with	JUND (interacts with) CHST12
106409	0.309243168401771	1	0.465840347807552	BRCA_1	0.663839381576122	interacts with	JUND (interacts with) IDUA
106410	0.508485369461662	1	0.509689273694137	BRCA_1	0.997637964354735	interacts with	JUND (interacts with) HYAL2
106411	0.407056013362217	1	0.420580144040788	BRCA_1	0.967844105647413	interacts with	KAT5 (interacts with) B3GAT3
106412	0.364144364485727	14	0.407379810320108	BRCA_1	0.893869443847971	interacts with	KDM1A (interacts with) GNB1
106413	0.408734278463169	4	0.424220087988183	BRCA_1	0.963495812754993	interacts with	KDM3A (interacts with) FKTN
106414	0.506475704048853	4	0.577925232160614	BRCA_1	0.876368907021688	interacts with	KDM5A (interacts with) ALG10
106415	0.507105983335632	4	0.567554089015631	BRCA_1	0.89349366544986	interacts with	KDM5A (interacts with) NEU3
106416	0.411115920781412	4	0.456256620334593	BRCA_1	0.901062916040369	interacts with	KDM5A (interacts with) ALG10B
106417	0.462570176700065	4	0.576294626241895	BRCA_1	0.802662658363754	interacts with	KDM5A (interacts with) MAN2A1
106418	0.45090945801325	4	0.549169099958864	BRCA_1	0.821075799871162	interacts with	KDM5A (interacts with) UGGT1
106419	0.46644403408796	4	0.477386927475992	BRCA_1	0.977077517715267	interacts with	KDM5A (interacts with) SLC35A3
106420	0.50535179883137	4	0.517406469640033	BRCA_1	0.976701739317157	interacts with	KDM5A (interacts with) FUT11
106421	0.411773194864079	4	0.427803183152708	BRCA_1	0.962529525445566	interacts with	KDM5A (interacts with) COG5
106422	0.409763293032928	4	0.437851811083427	BRCA_1	0.935849259179729	interacts with	KDM5A (interacts with) SLC35F5
106423	0.45226043582431	4	0.510464578195301	BRCA_1	0.885978097487653	interacts with	KDM5A (interacts with) GNS
106424	0.402628939401391	4	0.474634342688844	BRCA_1	0.848292892420013	interacts with	KDM5A (interacts with) PIGN
106425	0.423563571581025	4	0.434168393298373	BRCA_1	0.975574404122826	interacts with	KDM5A (interacts with) SLC35A5
106426	0.346746012949579	4	0.411098824416036	BRCA_1	0.84346145587288	interacts with	KDM5A (interacts with) HS2ST1
106427	0.219450720507058	4	0.40239472601688	BRCA_1	0.545361820914752	interacts with	KDM5B (interacts with) MAN1A2
106428	0.264342205850126	4	0.448589469852979	BRCA_1	0.589274210865364	interacts with	KDM5B (interacts with) UGGT1
106429	0.382687411510148	4	0.474708736872281	BRCA_1	0.80615202920335	interacts with	KDM5B (interacts with) FAM20B
106430	0.332317884813836	4	0.426073202444224	BRCA_1	0.779954906592227	interacts with	KDM5B (interacts with) B3GALNT2
106431	0.258840311094097	4	0.451087783240793	BRCA_1	0.573813613914537	interacts with	KDM5B (interacts with) FKTN
106432	0.551903679710958	2	0.712859641218675	BRCA_1	0.774210865363968	interacts with	LMO2 (interacts with) MFNG
106433	0.415325479957791	2	0.437076043198335	BRCA_1	0.950236203564527	interacts with	LMO2 (interacts with) ST8SIA4
106434	0.534321304124134	2	0.566560635998655	BRCA_1	0.943096414000429	interacts with	LMO2 (interacts with) ST6GALNAC3
106435	0.389596847882201	2	0.485120994809468	BRCA_1	0.803092119390165	interacts with	LMO2 (interacts with) HYAL2
106436	0.449172070113527	2	0.491608538312267	BRCA_1	0.913678333691218	interacts with	LMO2 (interacts with) CSGALNACT1
106437	0.446520049442148	2	0.54258157084203	BRCA_1	0.822954691861714	interacts with	LMO2 (interacts with) HYAL1
106438	0.383504779489098	2	0.432886568037504	BRCA_1	0.885924414859351	interacts with	LMO2 (interacts with) MGAT1
106439	0.44881983663053	2	0.4673084744706	BRCA_1	0.960435902941808	interacts with	LMO2 (interacts with) ST3GAL2
106440	0.429084831355363	2	0.522349512383198	BRCA_1	0.821451578269272	interacts with	LMO2 (interacts with) GBGT1
106441	0.313106296712006	2	0.402216681273792	BRCA_1	0.778451792999785	interacts with	LMO2 (interacts with) HS3ST1
106442	0.51195610076143	2	0.658840638686281	BRCA_1	0.777056044663947	interacts with	LMO2 (interacts with) CHST2
106443	0.374486226937398	2	0.485721308688891	BRCA_1	0.770989907665879	interacts with	LMO2 (interacts with) ST6GALNAC6
106444	0.71756083870228	2	0.815093804704316	BRCA_1	0.880341421515997	interacts with	LYL1 (interacts with) MFNG
106445	0.643977180687135	2	0.657928312501505	BRCA_1	0.978795361820915	interacts with	LYL1 (interacts with) FUT7
106446	0.564756341066173	2	0.612071277715888	BRCA_1	0.922697015245866	interacts with	LYL1 (interacts with) MAN2B1
106447	0.647327306155509	2	0.674596534772857	BRCA_1	0.959576980888984	interacts with	LYL1 (interacts with) MGAT1
106448	0.552025726382812	2	0.580574482331697	BRCA_1	0.950826712475843	interacts with	LYL1 (interacts with) RENBP
106449	0.611513248587833	2	0.617680771862822	BRCA_1	0.990015031135924	interacts with	LYL1 (interacts with) CHST12
106450	0.513949105636207	2	0.532590339329732	BRCA_1	0.964998926347434	interacts with	LYL1 (interacts with) ST6GALNAC6
106451	0.579200107310453	2	0.585073455830981	BRCA_1	0.989961348507623	interacts with	LYL1 (interacts with) ST3GAL2
106452	0.335426322215404	2	0.446181200387642	BRCA_1	0.751771526733949	interacts with	LYL1 (interacts with) IDUA
106453	0.422396760605841	2	0.650281558393852	BRCA_1	0.649559802447928	interacts with	LYL1 (interacts with) GBGT1
106454	0.54885623103648	2	0.568352541650317	BRCA_1	0.965696800515353	interacts with	LYL1 (interacts with) HYAL2
106455	0.44066235458876	2	0.459456976451328	BRCA_1	0.959093837234271	interacts with	LYL1 (interacts with) CHST13
106456	0.464709353716914	2	0.483825499722707	BRCA_1	0.96048958557011	interacts with	LYL1 (interacts with) HYAL1
106457	0.406571195641813	2	0.436242626139951	BRCA_1	0.931984109942023	interacts with	LYL1 (interacts with) FKRP
106458	0.548175262671626	2	0.694464689407444	BRCA_1	0.789349366544986	interacts with	LYL1 (interacts with) CHST2
106459	0.615445513854568	2	0.616935776883166	BRCA_1	0.997584411401578	interacts with	MAFB (interacts with) DSE
106460	0.497039638983634	2	0.535811089325046	BRCA_1	0.927639701540609	interacts with	MAFB (interacts with) B3GNT5
106461	0.457514848571481	6	0.546004651110868	BRCA_1	0.837932145157827	interacts with	MAX (interacts with) PIGH
106462	0.511303235830846	1	0.581226379267529	BRCA_1	0.87969722997638	interacts with	MAZ (interacts with) PIGQ
106463	0.304440304082162	1	0.40580422071145	BRCA_1	0.750214730513206	interacts with	MAZ (interacts with) B4GALT2
106464	0.385074574533833	1	0.422771802582439	BRCA_1	0.910833154391239	interacts with	MAZ (interacts with) DPM2
106465	0.404833568087651	1	0.484250928294918	BRCA_1	0.835999570538974	interacts with	MAZ (interacts with) B3GALT6
106466	0.439581949390571	1	0.446217239019539	BRCA_1	0.98512991196049	interacts with	MAZ (interacts with) B3GAT3
106467	0.388888720416548	1	0.411252857446464	BRCA_1	0.945619497530599	interacts with	MAZ (interacts with) RFNG
106468	0.320251518851579	1	0.431542628267304	BRCA_1	0.742108653639682	interacts with	MAZ (interacts with) B4GALNT4
106469	0.368528547682093	1	0.453161910767842	BRCA_1	0.813238136139145	interacts with	MAZ (interacts with) ALG1
106470	0.382949651910878	1	0.40974073037311	BRCA_1	0.934614558728795	interacts with	MAZ (interacts with) MGAT4B
106471	0.47583820078647	2	0.479467213460144	BRCA_1	0.992431155724945	interacts with	MECOM (interacts with) ST6GALNAC1
106472	0.39391979265402	2	0.40258568232125	BRCA_1	0.97847442160073	interacts with	MECOM (interacts with) ST3GAL2
106473	0.409670716836527	2	0.418614216661053	BRCA_1	0.978635460840625	interacts with	MECOM (interacts with) GALNT12
106474	0.358957553484248	1	0.485138308518071	BRCA_1	0.739907665879321	interacts with	MECP2 (interacts with) IDS
106475	0.272321541340622	1	0.407029260378168	BRCA_1	0.669046596521366	interacts with	MECP2 (interacts with) NDST1
106476	0.429199673080903	4	0.441865747986965	BRCA_1	0.971335015298728	interacts with	MED1 (interacts with) FUT11
106477	0.461490298665374	4	0.503874268774895	BRCA_1	0.915883837028289	interacts with	MED1 (interacts with) PIGW
106478	0.344856610810984	2	0.497212766732741	BRCA_1	0.693579557655143	interacts with	MEF2A (interacts with) CSGALNACT2
106479	0.265224895815981	2	0.447802896697189	BRCA_1	0.592280438050247	interacts with	MEF2A (interacts with) IDS
106480	0.332330643757246	2	0.407226367051044	BRCA_1	0.816083315439124	interacts with	MEF2A (interacts with) DSE
106481	0.22330981550036	2	0.426998074639777	BRCA_1	0.522976164913034	interacts with	MEF2A (interacts with) HS2ST1
106482	0.526850050175245	2	0.657653470124269	BRCA_1	0.80110586214301	interacts with	MEF2C (interacts with) ST6GALNAC3
106483	0.357408900629761	2	0.418440890008874	BRCA_1	0.854144298904874	interacts with	MEF2C (interacts with) ARSB
106484	0.398616583986973	2	0.439921187659774	BRCA_1	0.906109083100709	interacts with	MEF2C (interacts with) SLC35F1
106485	0.320921919707362	2	0.469720556321894	BRCA_1	0.683218810392957	interacts with	MEF2C (interacts with) CHSY3
106486	0.310374095270441	2	0.460432320355003	BRCA_1	0.674092763581705	interacts with	MEF2C (interacts with) ST3GAL2
106487	0.328556575714371	2	0.402893284998177	BRCA_1	0.815492806527808	interacts with	MEF2C (interacts with) DSEL
106488	0.463903089406988	2	0.591201118524552	BRCA_1	0.784678977882757	interacts with	MEF2C (interacts with) DSE
106489	0.332810738679586	2	0.637621972654872	BRCA_1	0.521956194975306	interacts with	MEF2C (interacts with) MFNG
106490	0.467346764540337	2	0.658378244714316	BRCA_1	0.709845394030492	interacts with	MEF2C (interacts with) CSGALNACT1
106491	0.416585883510056	2	0.598546998690731	BRCA_1	0.695995275928709	interacts with	MEF2C (interacts with) B3GALT2
106492	0.345688289078323	2	0.41352950481319	BRCA_1	0.835945887910672	interacts with	MEF2C (interacts with) SLC35B4
106493	0.39328332961223	2	0.467105449121182	BRCA_1	0.841958342280438	interacts with	MEF2C (interacts with) CHST11
106494	0.399146031138016	2	0.418441795713825	BRCA_1	0.953886622289027	interacts with	MEF2C (interacts with) UST
106495	0.324316025005971	2	0.527169189686843	BRCA_1	0.61520292033498	interacts with	MEF2C (interacts with) MGAT3
106496	0.37617728394315	2	0.504967244021979	BRCA_1	0.744953832939661	interacts with	MEF2C (interacts with) CHST3
106497	0.378529487164356	2	0.437449425330208	BRCA_1	0.865310285591583	interacts with	MEIS1 (interacts with) CHST3
106498	0.398630428749377	2	0.417314129860818	BRCA_1	0.955228687996564	interacts with	MEIS1 (interacts with) CSGALNACT1
106499	0.390349510049047	2	0.444138203835429	BRCA_1	0.878891990551857	interacts with	MITF (interacts with) GAL3ST4
106500	0.380734688175268	2	0.493791392559276	BRCA_1	0.771043590294181	interacts with	MITF (interacts with) ST3GAL6
106501	0.328680457495854	2	0.454911922299783	BRCA_1	0.722514494309641	interacts with	MITF (interacts with) CSGALNACT1
106502	0.327796330703548	2	0.57719917273331	BRCA_1	0.567908524801374	interacts with	MITF (interacts with) ARSB
106503	0.405809467488306	2	0.574205754680757	BRCA_1	0.706731801589006	interacts with	MITF (interacts with) GFPT2
106504	0.26465563694789	2	0.450064378771708	BRCA_1	0.58803951041443	interacts with	MITF (interacts with) CHST6
106505	0.310771413471463	2	0.4124429958782	BRCA_1	0.753489370839596	interacts with	MITF (interacts with) UST
106506	0.385028633746871	4	0.411939950497959	BRCA_1	0.934671748349348	interacts with	MRE11A (interacts with) NEU3
106507	0.427125743395245	2	0.436857662990558	BRCA_1	0.977722905147888	interacts with	MSX1 (interacts with) ST3GAL2
106508	0.382781143425239	2	0.417153967524791	BRCA_1	0.9176015889205	interacts with	MSX1 (interacts with) A4GALT
106509	0.444437923402414	1	0.446836530577126	BRCA_1	0.99463202533684	interacts with	MXD3 (interacts with) MOGS
106510	0.409100172789278	3	0.447354256802739	BRCA_1	0.914488163615868	interacts with	MYBL1 (interacts with) PIGW
106511	0.283477534823919	3	0.432766720103259	BRCA_1	0.655035430534679	interacts with	MYBL2 (interacts with) RPN2
106512	0.334852509098855	3	0.42026900279568	BRCA_1	0.79675756925059	interacts with	MYBL2 (interacts with) RPN1
106513	0.41471694267013	3	0.504990665973276	BRCA_1	0.821236847756066	interacts with	MYBL2 (interacts with) ALG3
106514	0.297947181035053	3	0.420817354486388	BRCA_1	0.708020184668241	interacts with	MYBL2 (interacts with) DPM1
106515	0.331483948974543	3	0.428305680897398	BRCA_1	0.773942452222461	interacts with	MYBL2 (interacts with) SLC35B1
106516	0.555509316861361	2	0.682587569557614	BRCA_1	0.813828645050462	interacts with	MYH11 (interacts with) CHST3
106517	0.592593183629194	2	0.592593183629194	BRCA_1	1.0	interacts with	MYH11 (interacts with) HPSE2
106518	0.389880215347643	2	0.515999193711964	BRCA_1	0.755582993343354	interacts with	MYH11 (interacts with) ST6GALNAC3
106519	0.382351203456608	2	0.502890504694606	BRCA_1	0.760307064633884	interacts with	MYH11 (interacts with) CHST2
106520	0.303205776110059	2	0.446491478053611	BRCA_1	0.679085248013743	interacts with	MYH11 (interacts with) CHST7
106521	0.417505360126396	2	0.587142522152688	BRCA_1	0.711080094481426	interacts with	MYH11 (interacts with) HS3ST4
106522	0.531592693501876	2	0.531592693501876	BRCA_1	1.0	interacts with	MYH11 (interacts with) CHST9
106523	0.499754181215292	2	0.499754181215292	BRCA_1	1.0	interacts with	MYH11 (interacts with) B3GALT1
106524	0.389306119113913	2	0.456071592154831	BRCA_1	0.85360747262186	interacts with	MYH11 (interacts with) SLC35F3
106525	0.365445803766942	2	0.44824681850073	BRCA_1	0.815278076014602	interacts with	MYH11 (interacts with) SULT1C4
106526	0.251189753489832	2	0.406812965398069	BRCA_1	0.617457590723642	interacts with	MYH11 (interacts with) HAS3
106527	0.499747511245666	1	0.518940712764521	BRCA_1	0.96301465457083	interacts with	MZF1 (interacts with) FKRP
106528	0.487309560653074	1	0.499042922621413	BRCA_1	0.976488270975361	interacts with	MZF1 (interacts with) MOGS
106529	0.441930685538491	1	0.458980138311677	BRCA_1	0.962853615330936	interacts with	MZF1 (interacts with) DPM3
106530	0.536430866097179	1	0.58262421901378	BRCA_1	0.920715014225133	interacts with	MZF1 (interacts with) B4GALNT4
106531	0.407339118351972	4	0.422253655098708	BRCA_1	0.96467872671641	interacts with	NFAT5 (interacts with) ACER2
106532	0.268394383861304	2	0.412648611965036	BRCA_1	0.650418724500752	interacts with	NFATC1 (interacts with) MFNG
106533	0.398820612691418	4	0.453278241196811	BRCA_1	0.879858277861284	interacts with	NFIC (interacts with) MGAT5
106534	0.456955049823268	2	0.498221679922606	BRCA_1	0.917172150947448	interacts with	NFYC (interacts with) ST3GAL3
106535	0.456184694005041	4	0.551483449927049	BRCA_1	0.827195619497531	interacts with	NIPBL (interacts with) NEU3
106536	0.494356956598159	4	0.505954694110791	BRCA_1	0.977077517715267	interacts with	NIPBL (interacts with) FUT11
106537	0.461987794889711	4	0.491933159817115	BRCA_1	0.93912716731977	interacts with	NPAT (interacts with) FUT11
106538	0.395023234246523	4	0.464404721208219	BRCA_1	0.850601245436977	interacts with	NR2C2 (interacts with) STT3B
106539	0.419334164326887	4	0.523970808497535	BRCA_1	0.800300622718488	interacts with	NR2C2 (interacts with) FKTN
106540	0.516261525499112	4	0.537318119175185	BRCA_1	0.960811681339918	interacts with	NR2C2 (interacts with) OGT
106541	0.440795109933437	4	0.490920202549328	BRCA_1	0.897895640970582	interacts with	NR2C2 (interacts with) ALG10B
106542	0.438818515110031	4	0.469599086543899	BRCA_1	0.934453510843891	interacts with	NR2C2 (interacts with) FUT11
106543	0.358616289268175	4	0.448222238089611	BRCA_1	0.800085892205282	interacts with	NR2C2 (interacts with) FAM20B
106544	0.384986088733822	4	0.418603832648473	BRCA_1	0.919690788060983	interacts with	NR2C2 (interacts with) COG3
106545	0.359621437684111	4	0.426363807356136	BRCA_1	0.84346145587288	interacts with	NR2C2 (interacts with) SLC35D1
106546	0.374901031704642	4	0.409286550934424	BRCA_1	0.915986686708181	interacts with	NR2C2 (interacts with) SLC35B4
106547	0.363782747280301	4	0.422267261735883	BRCA_1	0.861498818982177	interacts with	NR2C2 (interacts with) UGGT1
106548	0.451177172155294	2	0.567413473056226	BRCA_1	0.795147090401546	interacts with	NR2F1 (interacts with) CHST3
106549	0.367265189725325	2	0.476786950603063	BRCA_1	0.77029203349796	interacts with	NR2F1 (interacts with) ST3GAL2
106550	0.285583108768485	2	0.448666791780327	BRCA_1	0.636514923770668	interacts with	NR2F1 (interacts with) DSE
106551	0.478627221060134	2	0.613364603323347	BRCA_1	0.780330684990337	interacts with	NR5A2 (interacts with) ST6GALNAC3
106552	0.422462093614928	2	0.422462093614928	BRCA_1	1.0	interacts with	NR5A2 (interacts with) ST8SIA4
106553	0.361657395193652	2	0.493080140354779	BRCA_1	0.733465750483144	interacts with	NR5A2 (interacts with) CSGALNACT1
106554	0.472674270796934	2	0.472674270796934	BRCA_1	1.0	interacts with	NR5A2 (interacts with) SULT1C4
106555	0.459548520825843	2	0.459548520825843	BRCA_1	1.0	interacts with	NR5A2 (interacts with) B3GNT5
106556	0.392211863488446	4	0.41601882434021	BRCA_1	0.942774318230621	interacts with	PBX1 (interacts with) MAN1A2
106557	0.272971712594885	4	0.505911557279625	BRCA_1	0.539564097058192	interacts with	PBX1 (interacts with) FAM20B
106558	0.340616715570761	4	0.502336171138637	BRCA_1	0.678065278076015	interacts with	PBX1 (interacts with) PIGM
106559	0.22848821410185	4	0.413070501969066	BRCA_1	0.553145802018467	interacts with	PBX1 (interacts with) STT3B
106560	0.305785647455099	4	0.415082346483537	BRCA_1	0.736686708181233	interacts with	PBX1 (interacts with) UGGT1
106561	0.421797257964089	1	0.422409478476132	BRCA_1	0.998550646840947	interacts with	PCGF1 (interacts with) RFNG
106562	0.491299981325945	4	0.512654867648072	BRCA_1	0.958344516613882	interacts with	PHF20 (interacts with) POFUT1
106563	0.461092916198586	4	0.465288984121307	BRCA_1	0.990981802565892	interacts with	PHF20 (interacts with) SLC35A3
106564	0.438722444058876	4	0.460189212295766	BRCA_1	0.953352300177143	interacts with	PHF6 (interacts with) FAM20B
106565	0.401516848338001	4	0.406845655027937	BRCA_1	0.986902141821891	interacts with	PHF6 (interacts with) SLC35F5
106566	0.540910636179575	4	0.639995130256169	BRCA_1	0.845179299978527	interacts with	PIAS1 (interacts with) MGAT5
106567	0.428584679741134	4	0.531748728800975	BRCA_1	0.805990981318445	interacts with	PIAS1 (interacts with) ACER2
106568	0.463753823955348	4	0.521257843036277	BRCA_1	0.889682198840455	interacts with	PIAS1 (interacts with) FUT11
106569	0.459839262506434	4	0.488753040167172	BRCA_1	0.940841743611767	interacts with	PIAS1 (interacts with) ALG10
106570	0.426305510396725	4	0.431283280707663	BRCA_1	0.988458234915181	interacts with	PIAS1 (interacts with) SLC35A3
106571	0.423315316383287	4	0.470075571599873	BRCA_1	0.900526089757354	interacts with	PIAS1 (interacts with) FKTN
106572	0.386802723408361	4	0.448988106408958	BRCA_1	0.861498818982177	interacts with	PIAS1 (interacts with) COG5
106573	0.388698976823568	4	0.482165848056831	BRCA_1	0.80615202920335	interacts with	PIAS1 (interacts with) SLC35A5
106574	0.345754417644036	4	0.43409808531867	BRCA_1	0.796489156109083	interacts with	PIAS1 (interacts with) SLC35F5
106575	0.426116867630038	4	0.563757458111673	BRCA_1	0.755851406484861	interacts with	POLR2B (interacts with) MAN1A2
106576	0.369850050949422	4	0.42019802080299	BRCA_1	0.880180373631093	interacts with	POLR2B (interacts with) MAN2A1
106577	0.415791385406074	4	0.547801253790533	BRCA_1	0.759018681554649	interacts with	POLR3A (interacts with) MGAT5
106578	0.477971001713671	4	0.509332636572408	BRCA_1	0.938426025338201	interacts with	POLR3A (interacts with) NEU3
106579	0.31707248691506	2	0.487409332088937	BRCA_1	0.650526089757354	interacts with	PPARG (interacts with) CHST7
106580	0.384814392831722	2	0.410345326559581	BRCA_1	0.937781833798583	interacts with	PPARG (interacts with) ST6GALNAC1
106581	0.571584966134329	2	0.58467326061997	BRCA_1	0.977614343998282	interacts with	PPARG (interacts with) MFNG
106582	0.492601094878041	2	0.506607033367645	BRCA_1	0.972353446424737	interacts with	PPARG (interacts with) MGAT3
106583	0.390205396642068	2	0.437797152842766	BRCA_1	0.8912926776895	interacts with	PPARG (interacts with) B3GNT5
106584	0.382987355272176	2	0.421698099894201	BRCA_1	0.908202705604466	interacts with	PPARG (interacts with) CSGALNACT1
106585	0.57107250724644	2	0.731280584655715	BRCA_1	0.780921193901653	interacts with	PRDM1 (interacts with) DSE
106586	0.504262506742283	2	0.54999718810207	BRCA_1	0.916845608761005	interacts with	PRDM1 (interacts with) CSGALNACT1
106587	0.517248394809281	2	0.659365161055723	BRCA_1	0.784464247369551	interacts with	PRDM1 (interacts with) HAS2
106588	0.507156886277732	2	0.558550223340522	BRCA_1	0.907987975091261	interacts with	PRDM1 (interacts with) FUT4
106589	0.443330071268531	2	0.479690553414858	BRCA_1	0.924200128838308	interacts with	PRDM1 (interacts with) B3GALT2
106590	0.49771720077449	2	0.602317677907308	BRCA_1	0.826336697444707	interacts with	PRDM1 (interacts with) B3GNT5
106591	0.377427201991904	2	0.502804399535521	BRCA_1	0.750644191539618	interacts with	PRDM1 (interacts with) ST6GAL2
106592	0.321038697300195	2	0.459105546853065	BRCA_1	0.6992699162551	interacts with	PRDM1 (interacts with) SLC35B4
106593	0.372678234236988	2	0.408800503319198	BRCA_1	0.911638393815761	interacts with	PRDM1 (interacts with) UST
106594	0.393861881680195	4	0.41812612594396	BRCA_1	0.941969078806098	interacts with	PRKDC (interacts with) ALG10
106595	0.310218274996821	4	0.408565188535123	BRCA_1	0.759287094696156	interacts with	PRKDC (interacts with) FUT11
106596	0.397006934659532	4	0.437031389837948	BRCA_1	0.908417436117672	interacts with	PRKDC (interacts with) PIGN
106597	0.387577703813503	4	0.456054416438503	BRCA_1	0.849849688640756	interacts with	PRKDC (interacts with) POFUT1
106598	0.330697409690366	4	0.441815344453284	BRCA_1	0.748496886407559	interacts with	PRKDC (interacts with) SLC35A3
106599	0.335218917750141	4	0.418557410003996	BRCA_1	0.800891131629805	interacts with	PRKDC (interacts with) PIGW
106600	0.487735258214049	1	0.529056720931031	BRCA_1	0.921895968651028	interacts with	RAC3 (interacts with) GALK1
106601	0.48094856758448	4	0.699766454500016	BRCA_1	0.687298690143869	interacts with	RB1 (interacts with) COG6
106602	0.318449482756319	4	0.625482598564394	BRCA_1	0.509126046811252	interacts with	RB1 (interacts with) COG3
106603	0.307295081132547	4	0.448085539830692	BRCA_1	0.685795576551428	interacts with	RB1 (interacts with) SLC35A5
106604	0.279195412963369	4	0.435801252948017	BRCA_1	0.640648486149882	interacts with	RB1 (interacts with) UGGT2
106605	0.558037499812849	4	0.615168809712022	BRCA_1	0.907129053038437	interacts with	RBBP5 (interacts with) MAN1A2
106606	0.540648000423082	4	0.649126068442228	BRCA_1	0.832885978097488	interacts with	RBBP5 (interacts with) FAM20B
106607	0.392448688217603	4	0.405532488163173	BRCA_1	0.967736740390809	interacts with	RBBP5 (interacts with) COG5
106608	0.430654516082167	4	0.431813560425159	BRCA_1	0.997315868584926	interacts with	RBBP5 (interacts with) FUT11
106609	0.44830173970207	4	0.579686575535898	BRCA_1	0.773351943311145	interacts with	RBBP5 (interacts with) UGGT1
106610	0.422148857690518	4	0.456745595693731	BRCA_1	0.924253811466609	interacts with	RBBP5 (interacts with) SLC35A3
106611	0.432150586563635	4	0.476168290932651	BRCA_1	0.907558514064849	interacts with	RBBP5 (interacts with) PIGN
106612	0.395511638953333	4	0.570158706889234	BRCA_1	0.693686922911746	interacts with	RBBP5 (interacts with) STT3B
106613	0.420624374682177	4	0.485073413705169	BRCA_1	0.867135494953833	interacts with	RBBP5 (interacts with) B3GALNT2
106614	0.425606670624379	4	0.455382025295286	BRCA_1	0.934614558728795	interacts with	RBL2 (interacts with) ALG10B
106615	0.390751438714142	4	0.416557044773208	BRCA_1	0.93805024694009	interacts with	RBL2 (interacts with) SLC35A5
106616	0.238204293407901	4	0.406343367912306	BRCA_1	0.58621430105218	interacts with	RBL2 (interacts with) MAN1A2
106617	0.324574700888676	4	0.422042267775671	BRCA_1	0.769057333047026	interacts with	RBL2 (interacts with) GNS
106618	0.307602913240014	4	0.436773158612317	BRCA_1	0.704262400687138	interacts with	RCOR1 (interacts with) FKTN
106619	0.317257002081512	4	0.43506061798987	BRCA_1	0.729224822847327	interacts with	RCOR1 (interacts with) NEU3
106620	0.415905843019556	4	0.474985840461547	BRCA_1	0.875617350225467	interacts with	RCOR1 (interacts with) ACER2
106621	0.574164685054686	4	0.615426577553725	BRCA_1	0.932953996457137	interacts with	REST (interacts with) FUT11
106622	0.481406382860861	1	0.481406382860861	BRCA_1	1.0	interacts with	RFX1 (interacts with) MOGS
106623	0.487670797223064	1	0.489457425864364	BRCA_1	0.996349777229051	interacts with	RFX1 (interacts with) HYAL2
106624	0.291782997931232	7	0.407049628208118	BRCA_1	0.716824135709684	interacts with	RFX5 (interacts with) COG2
106625	0.47770164149375	4	0.493353136677407	BRCA_1	0.968275269740727	interacts with	RFX7 (interacts with) NEU3
106626	0.404587513493196	7	0.421890741231038	BRCA_1	0.958986471977668	interacts with	RNF2 (interacts with) FPGT
106627	0.394940510115758	7	0.422910543943225	BRCA_1	0.933863001932575	interacts with	RNF2 (interacts with) COG2
106628	0.477353772151144	2	0.498689065803256	BRCA_1	0.957217241934618	interacts with	RORA (interacts with) DSE
106629	0.448802144634264	2	0.480863128393366	BRCA_1	0.93332617564956	interacts with	RUNX1 (interacts with) CHSY1
106630	0.504095180977334	2	0.51357936071132	BRCA_1	0.98153317586429	interacts with	RUNX1 (interacts with) CHST3
106631	0.23000880890433	2	0.425355315424387	BRCA_1	0.540745114880825	interacts with	RUNX1 (interacts with) CHSY3
106632	0.209714206254245	2	0.417634833665179	BRCA_1	0.502147305132059	interacts with	RUNX1 (interacts with) SULF2
106633	0.290424008806925	2	0.401962882536251	BRCA_1	0.722514494309641	interacts with	RUNX1 (interacts with) ST8SIA2
106634	0.424253458763187	2	0.441211281376621	BRCA_1	0.961565301411777	interacts with	RUNX2 (interacts with) SULF2
106635	0.546097734008487	2	0.57469521448673	BRCA_1	0.950238874872511	interacts with	RUNX2 (interacts with) TPST1
106636	0.478232561840618	2	0.504415943524452	BRCA_1	0.948091685007247	interacts with	RUNX2 (interacts with) CHST3
106637	0.578898661887665	2	0.581520796565398	BRCA_1	0.995490901282946	interacts with	RUNX3 (interacts with) CHST11
106638	0.564194939397802	2	0.58941159298125	BRCA_1	0.957217241934618	interacts with	RUNX3 (interacts with) FUT4
106639	0.442218890856514	1	0.44419808567674	BRCA_1	0.995544341850977	interacts with	RXRA (interacts with) NDST1
106640	0.273545795016536	1	0.450381038498147	BRCA_1	0.607365256602963	interacts with	RXRA (interacts with) POMT1
106641	0.418254862365674	1	0.448004805712597	BRCA_1	0.933594588791067	interacts with	RXRA (interacts with) ST6GALNAC6
106642	0.537680142946254	4	0.590769476395117	BRCA_1	0.91013528022332	interacts with	SIN3A (interacts with) RTF1
106643	0.403536216485749	4	0.442414963256814	BRCA_1	0.912121537470475	interacts with	SIN3A (interacts with) PIGN
106644	0.328388113487605	4	0.449728994121975	BRCA_1	0.730191110156753	interacts with	SIN3A (interacts with) MAN1A2
106645	0.322925380899239	4	0.473359615627244	BRCA_1	0.682198840455229	interacts with	SIN3A (interacts with) ACER2
106646	0.288985081904806	4	0.520973009360566	BRCA_1	0.55470259823921	interacts with	SIN3A (interacts with) UGCG
106647	0.303578171315666	4	0.425543996934926	BRCA_1	0.713388447498389	interacts with	SIN3A (interacts with) FKTN
106648	0.278359666961349	4	0.490148773622839	BRCA_1	0.567908524801374	interacts with	SIN3A (interacts with) ALG10B
106649	0.438905391153605	1	0.51166716480439	BRCA_1	0.857794717629375	interacts with	SIX5 (interacts with) PIGQ
106650	0.395959629704809	1	0.466683706557493	BRCA_1	0.848453940304917	interacts with	SIX5 (interacts with) B3GALT6
106651	0.454949865372055	1	0.471871163260058	BRCA_1	0.96414000429461	interacts with	SIX5 (interacts with) RFNG
106652	0.44710413821513	1	0.450343672903182	BRCA_1	0.992806527807601	interacts with	SIX5 (interacts with) MOGS
106653	0.485219747873768	1	0.506453379469522	BRCA_1	0.958073867296543	interacts with	SIX5 (interacts with) B4GALT7
106654	0.439047557021984	1	0.480951360905941	BRCA_1	0.912873094266695	interacts with	SIX5 (interacts with) DPM3
106655	0.469415461148404	1	0.476838870665965	BRCA_1	0.98443203779257	interacts with	SIX5 (interacts with) HYAL2
106656	0.271153837023694	4	0.508154293367944	BRCA_1	0.533605325316728	interacts with	SMAD4 (interacts with) ALG10B
106657	0.275211202726365	4	0.439225007229842	BRCA_1	0.626583637534894	interacts with	SMAD4 (interacts with) GLCE
106658	0.344276802446068	4	0.403243729625588	BRCA_1	0.853768520506764	interacts with	SMARCC2 (interacts with) OGT
106659	0.40572033493904	4	0.416038665597514	BRCA_1	0.975198625724715	interacts with	SMC1A (interacts with) NEU3
106660	0.420768761174231	4	0.522852410323099	BRCA_1	0.804756280867511	interacts with	SMC1A (interacts with) STT3B
106661	0.341373884974445	4	0.498753939553252	BRCA_1	0.684453510843891	interacts with	SMC1A (interacts with) MAN1A2
106662	0.464816552389089	4	0.517889989706558	BRCA_1	0.897519862572472	interacts with	SMC1A (interacts with) UGGT1
106663	0.350104772523478	4	0.411752743390829	BRCA_1	0.850279149667168	interacts with	SMC1A (interacts with) PIGW
106664	0.343631307695121	4	0.514687143181211	BRCA_1	0.667650848185527	interacts with	SMC3 (interacts with) STT3B
106665	0.427426167855014	4	0.43781450867718	BRCA_1	0.976272278290745	interacts with	SMC3 (interacts with) FUT11
106666	0.314422924965932	4	0.487885901396534	BRCA_1	0.644459952759287	interacts with	SMC3 (interacts with) FKTN
106667	0.391125497636032	4	0.43358044334468	BRCA_1	0.902082885978097	interacts with	SMC3 (interacts with) PIGN
106668	0.362324482341455	4	0.406466754414732	BRCA_1	0.891400042946103	interacts with	SMC3 (interacts with) SLC35A5
106669	0.351638519659952	4	0.447487521808006	BRCA_1	0.785806313077088	interacts with	SMC3 (interacts with) FAM20B
106670	0.361870244493572	4	0.417549486770705	BRCA_1	0.86665235129912	interacts with	SMC3 (interacts with) UGCG
106671	0.359924526359148	4	0.439823804580045	BRCA_1	0.818337985827786	interacts with	SMC3 (interacts with) UGGT1
106672	0.549492612549351	2	0.603104806409112	BRCA_1	0.911106339578077	interacts with	SOX10 (interacts with) CHST3
106673	0.574443750272519	2	0.583146494827056	BRCA_1	0.985076229332188	interacts with	SOX17 (interacts with) HYAL2
106674	0.381164132763386	2	0.616026849307336	BRCA_1	0.618745973802877	interacts with	SOX17 (interacts with) ST6GALNAC3
106675	0.306986425100016	2	0.527394920848759	BRCA_1	0.582080738672965	interacts with	SOX17 (interacts with) CSGALNACT1
106676	0.642315460866182	2	0.647004401936692	BRCA_1	0.9927528451793	interacts with	SOX17 (interacts with) HYAL1
106677	0.307798880472778	2	0.583580411750321	BRCA_1	0.527431823062057	interacts with	SOX17 (interacts with) MGAT3
106678	0.349331475322965	2	0.492011698345395	BRCA_1	0.710006441915396	interacts with	SOX17 (interacts with) ST6GALNAC1
106679	0.42401206296548	2	0.468336597030594	BRCA_1	0.905357526304488	interacts with	SOX17 (interacts with) ST3GAL2
106680	0.328986847135747	2	0.454761575277878	BRCA_1	0.723427098990767	interacts with	SOX17 (interacts with) CHST3
106681	0.41502340583571	2	0.447865600967883	BRCA_1	0.926669529740176	interacts with	SOX17 (interacts with) GBGT1
106682	0.22964049582963	2	0.441641870360763	BRCA_1	0.519969937728151	interacts with	SOX17 (interacts with) CHST12
106683	0.237987014789647	2	0.409800527962798	BRCA_1	0.580738672965428	interacts with	SOX17 (interacts with) ST3GAL3
106684	0.399513392732013	1	0.404002794626347	BRCA_1	0.988887695941593	interacts with	SPDEF (interacts with) DPM2
106685	0.4983333466597	5	0.52993788759696	BRCA_1	0.940361801492297	interacts with	SRCAP (interacts with) COG7
106686	0.357138275974728	1	0.444347569119505	BRCA_1	0.803736310929783	interacts with	SREBF2 (interacts with) ALG12
106687	0.349661409762112	2	0.425412627591185	BRCA_1	0.821934721923985	interacts with	SRF (interacts with) CHST2
106688	0.343730991906527	2	0.417760874093742	BRCA_1	0.822793643976809	interacts with	SRF (interacts with) MGAT3
106689	0.374837066865353	2	0.41000968183017	BRCA_1	0.914215159974232	interacts with	SRF (interacts with) HAS1
106690	0.371261767299416	2	0.408787339003046	BRCA_1	0.908202705604466	interacts with	SRF (interacts with) MFNG
106691	0.385731697067151	2	0.406759697309193	BRCA_1	0.948303628945673	interacts with	SRF (interacts with) HYAL2
106692	0.456189745608542	15	0.456189745608542	BRCA_1	1.0	interacts with	SSRP1 (interacts with) GANAB
106693	0.571290292606911	2	0.619801722229559	BRCA_1	0.92173072793644	interacts with	STAT1 (interacts with) LAMP3
106694	0.383873116259001	2	0.43212402765728	BRCA_1	0.888340133132918	interacts with	STAT1 (interacts with) ST8SIA4
106695	0.542181275745039	2	0.563885478453385	BRCA_1	0.961509555507838	interacts with	STAT1 (interacts with) HPSE
106696	0.3895471911658	2	0.45730306762267	BRCA_1	0.851835945887911	interacts with	STAT1 (interacts with) NPL
106697	0.410842890270572	2	0.53529980834862	BRCA_1	0.767500536826283	interacts with	STAT2 (interacts with) LAMP3
106698	0.384541577300081	2	0.420600111675527	BRCA_1	0.914268842602534	interacts with	STAT2 (interacts with) GAL3ST4
106699	0.408583015804136	2	0.43225150036344	BRCA_1	0.945243719132489	interacts with	STAT2 (interacts with) CHST11
106700	0.314344607663636	2	0.429328495605119	BRCA_1	0.732177367403908	interacts with	STAT2 (interacts with) HPSE
106701	0.608620474702134	2	0.610949086746314	BRCA_1	0.996188533390595	interacts with	STAT4 (interacts with) FUT7
106702	0.500527946342552	2	0.550923811419822	BRCA_1	0.908524801374275	interacts with	STAT4 (interacts with) ST8SIA4
106703	0.460290042623654	2	0.635697131820391	BRCA_1	0.724071290530384	interacts with	STAT4 (interacts with) MFNG
106704	0.374771938610878	2	0.53822000404313	BRCA_1	0.696317371698518	interacts with	STAT4 (interacts with) ST8SIA1
106705	0.523899714971174	2	0.539361329196586	BRCA_1	0.971333476487009	interacts with	STAT4 (interacts with) CHST11
106706	0.413147745500782	2	0.583525377450039	BRCA_1	0.708020184668241	interacts with	STAT4 (interacts with) CHST2
106707	0.306792600700192	2	0.523585209880272	BRCA_1	0.585945887910672	interacts with	STAT5A (interacts with) MFNG
106708	0.364356844065389	2	0.48136448874114	BRCA_1	0.756925059050891	interacts with	STAT5A (interacts with) GBGT1
106709	0.377134101954462	2	0.402040405814794	BRCA_1	0.93805024694009	interacts with	STAT5A (interacts with) ST6GALNAC6
106710	0.238910358194537	2	0.466794855511625	BRCA_1	0.511810178226326	interacts with	STAT5A (interacts with) MGAT3
106711	0.320218138024161	2	0.42024964598521	BRCA_1	0.76197122611123	interacts with	STAT5A (interacts with) CHST2
106712	0.415354401913452	3	0.496102962223889	BRCA_1	0.837234270989908	interacts with	SUMO2 (interacts with) SLC35B1
106713	0.37418265913892	3	0.474943756775674	BRCA_1	0.787846252952545	interacts with	SUMO2 (interacts with) COG1
106714	0.396351903260732	4	0.55832148018307	BRCA_1	0.709899076658793	interacts with	TAF1 (interacts with) NEU3
106715	0.389778946576589	4	0.555787064974641	BRCA_1	0.701309856130556	interacts with	TAF1 (interacts with) MAN1A2
106716	0.454147991360718	4	0.462313174658039	BRCA_1	0.982338415288812	interacts with	TAF1 (interacts with) FUT11
106717	0.4139923606234	4	0.51858312781203	BRCA_1	0.798314365471333	interacts with	TAF1 (interacts with) ACER2
106718	0.592177014462966	4	0.609822180630004	BRCA_1	0.971065063345501	interacts with	TCF12 (interacts with) FUT11
106719	0.433769666140692	4	0.57831816066911	BRCA_1	0.750053682628302	interacts with	TCF12 (interacts with) CSGALNACT2
106720	0.508612614281835	2	0.531048471433329	BRCA_1	0.957751771526734	interacts with	TCF7 (interacts with) MFNG
106721	0.409171899805211	2	0.554129709165502	BRCA_1	0.73840455228688	interacts with	TCF7 (interacts with) LAMP3
106722	0.541871528493875	2	0.542308216450003	BRCA_1	0.999194760575478	interacts with	TCF7 (interacts with) ST8SIA1
106723	0.323652999932503	2	0.421108338530605	BRCA_1	0.768574189392313	interacts with	TCF7 (interacts with) FUT4
106724	0.335700338969559	2	0.410653133328405	BRCA_1	0.817479063774962	interacts with	TCF7 (interacts with) CHST3
106725	0.337098891272513	2	0.435832741992252	BRCA_1	0.773459308567747	interacts with	TCF7L1 (interacts with) TPST1
106726	0.40189199761822	2	0.460931174216981	BRCA_1	0.871913248872665	interacts with	TCF7L1 (interacts with) CHST3
106727	0.406691522537807	2	0.416484314559333	BRCA_1	0.976487008803951	interacts with	TCF7L1 (interacts with) MFNG
106728	0.282406220093446	2	0.434370660383181	BRCA_1	0.650150311359244	interacts with	TCF7L1 (interacts with) ST8SIA1
106729	0.302309924017111	2	0.400329086840886	BRCA_1	0.755153532316942	interacts with	TCF7L1 (interacts with) GBGT1
106730	0.443697510427637	2	0.496318814882965	BRCA_1	0.893976809104574	interacts with	TCF7L2 (interacts with) CHST3
106731	0.281381566246237	2	0.494955223421614	BRCA_1	0.568499033712691	interacts with	TCF7L2 (interacts with) CSGALNACT1
106732	0.271259150996597	2	0.471187566650933	BRCA_1	0.575692505905089	interacts with	TCF7L2 (interacts with) ST8SIA1
106733	0.288624390722098	2	0.430636375680516	BRCA_1	0.670227614343998	interacts with	TCF7L2 (interacts with) GFPT2
106734	0.406328343044591	2	0.428746141057814	BRCA_1	0.947713120034357	interacts with	TCF7L2 (interacts with) ST8SIA2
106735	0.465408003898592	4	0.489918387558731	BRCA_1	0.949970476139353	interacts with	TDRD3 (interacts with) COG6
106736	0.401360430111282	4	0.411862038809247	BRCA_1	0.974502120349992	interacts with	TDRD3 (interacts with) ALG5
106737	0.411051952856223	4	0.521599167425458	BRCA_1	0.78806098346575	interacts with	TEAD1 (interacts with) CSGALNACT2
106738	0.382152262283557	4	0.535726395380652	BRCA_1	0.713334764870088	interacts with	TEAD1 (interacts with) FUT11
106739	0.419208123206328	4	0.442687580447136	BRCA_1	0.946961563238136	interacts with	TEAD1 (interacts with) EXTL2
106740	0.308770422039852	4	0.413886120872013	BRCA_1	0.74602748550569	interacts with	TEAD1 (interacts with) SLC35D1
106741	0.443773612414953	4	0.45224655900573	BRCA_1	0.981264762722783	interacts with	TEAD1 (interacts with) DSE
106742	0.346089774528003	4	0.401804943590379	BRCA_1	0.861337771097273	interacts with	TEAD1 (interacts with) GALNT1
106743	0.315654588443899	4	0.513807556233219	BRCA_1	0.614343998282156	interacts with	TEAD1 (interacts with) DSEL
106744	0.426514954971992	3	0.438013152942183	BRCA_1	0.973749194760576	interacts with	TERF1 (interacts with) PIGW
106745	0.510053957361502	4	0.555923299849632	BRCA_1	0.917489800300623	interacts with	TET2 (interacts with) MAN1A2
106746	0.333733764150834	4	0.411136337451342	BRCA_1	0.811735022546704	interacts with	TET2 (interacts with) STT3B
106747	0.453711994150986	4	0.462273534269243	BRCA_1	0.981479493235989	interacts with	TET2 (interacts with) COG5
106748	0.408581880523915	4	0.416428476795945	BRCA_1	0.98115739746618	interacts with	TET2 (interacts with) FUT11
106749	0.415471694578457	4	0.489464123868422	BRCA_1	0.848829718703028	interacts with	TET2 (interacts with) ACER2
106750	0.390031027494774	4	0.41624164882112	BRCA_1	0.937030277002362	interacts with	TET2 (interacts with) SLC35D1
106751	0.404866857963976	4	0.41370596983834	BRCA_1	0.97863431393601	interacts with	TET2 (interacts with) SLC35A3
106752	0.313753684527233	4	0.400781981442316	BRCA_1	0.782853768520507	interacts with	TET2 (interacts with) CSGALNACT2
106753	0.352842475746886	4	0.429002652451733	BRCA_1	0.822471548207	interacts with	TET2 (interacts with) ALG10
106754	0.51105157995188	2	0.568214684931576	BRCA_1	0.899398754563023	interacts with	TP63 (interacts with) HAS3
106755	0.437220032744844	2	0.45825323636814	BRCA_1	0.954101352802233	interacts with	TP63 (interacts with) B3GNT5
106756	0.604777810415995	2	0.606405482421636	BRCA_1	0.997315868584926	interacts with	TP63 (interacts with) CHST3
106757	0.349759913000997	2	0.544623226563786	BRCA_1	0.642205282370625	interacts with	TP63 (interacts with) ST8SIA2
106758	0.369268005576812	1	0.460731708498651	BRCA_1	0.801481640541121	interacts with	TRIM28 (interacts with) GPAA1
106759	0.379812439254505	1	0.415037608871527	BRCA_1	0.915127764655358	interacts with	TRIM28 (interacts with) B4GALT2
106760	0.374306718801776	1	0.403272733246933	BRCA_1	0.928172643332618	interacts with	TRIM28 (interacts with) B4GALT7
106761	0.353338737752041	1	0.425991457306648	BRCA_1	0.829450289886193	interacts with	TRIM28 (interacts with) GALK1
106762	0.427801447450769	1	0.433856999298395	BRCA_1	0.986042516641615	interacts with	TRIM28 (interacts with) B3GAT3
106763	0.343202001445111	1	0.416845985715559	BRCA_1	0.823330470259824	interacts with	TRIM28 (interacts with) B4GALNT4
106764	0.446307690167995	4	0.461494291004686	BRCA_1	0.967092548851192	interacts with	TTF2 (interacts with) MAN1A2
106765	0.3944612494351	4	0.417169533012208	BRCA_1	0.945565814902298	interacts with	TTF2 (interacts with) PIGW
106766	0.354098849127388	1	0.42121030405779	BRCA_1	0.840669959201202	interacts with	UBTF (interacts with) B4GALNT4
106767	0.418682704845493	1	0.485267634759945	BRCA_1	0.862787202061413	interacts with	USF1 (interacts with) DPM3
106768	0.612540088664714	1	0.645384432785424	BRCA_1	0.949108868370195	interacts with	USF1 (interacts with) B4GALT3
106769	0.36258729791171	1	0.415315512851216	BRCA_1	0.873040584066996	interacts with	USF1 (interacts with) IDUA
106770	0.382350108738423	1	0.524246858941509	BRCA_1	0.72933218810393	interacts with	USF2 (interacts with) DPM3
106771	0.510705196369858	1	0.560238878627743	BRCA_1	0.91158471118746	interacts with	USF2 (interacts with) IDUA
106772	0.405606870864228	1	0.444789826953484	BRCA_1	0.911906806957269	interacts with	USF2 (interacts with) B3GALT6
106773	0.392987403912698	1	0.519594673865125	BRCA_1	0.756334550139575	interacts with	USF2 (interacts with) RFNG
106774	0.435802662778717	1	0.498595504375503	BRCA_1	0.874060554004724	interacts with	USF2 (interacts with) B3GAT3
106775	0.442594037046326	1	0.462480603696582	BRCA_1	0.957000214730513	interacts with	USF2 (interacts with) MOGS
106776	0.352442370605012	1	0.443271654826154	BRCA_1	0.795093407773245	interacts with	USF2 (interacts with) B4GALNT4
106777	0.387488528381979	4	0.443537932081818	BRCA_1	0.873631092978312	interacts with	VEZF1 (interacts with) ALG10B
106778	0.366289484532395	4	0.45424675573327	BRCA_1	0.806366759716556	interacts with	VEZF1 (interacts with) ALG10
106779	0.483473150808698	4	0.493054738490333	BRCA_1	0.980566888554864	interacts with	VEZF1 (interacts with) UGCG
106780	0.36202968865665	4	0.439484460104013	BRCA_1	0.823759931286236	interacts with	VEZF1 (interacts with) FKTN
106781	0.41446283854609	4	0.437329429955623	BRCA_1	0.947713120034357	interacts with	VEZF1 (interacts with) GNS
106782	0.344287335328209	4	0.452443349735018	BRCA_1	0.760951256173502	interacts with	VEZF1 (interacts with) PIGN
106783	0.415311014661205	4	0.457099768455476	BRCA_1	0.908578484002577	interacts with	VEZF1 (interacts with) SLC35E3
106784	0.366346956744713	4	0.433895670793522	BRCA_1	0.844320377925703	interacts with	VEZF1 (interacts with) FPGT
106785	0.349637311263903	1	0.418038757010525	BRCA_1	0.836375348937084	interacts with	WDR5 (interacts with) DPM2
106786	0.40807233626707	1	0.517360068058461	BRCA_1	0.78875885763367	interacts with	WDR5 (interacts with) POMT1
106787	0.421537224610244	1	0.425235320049801	BRCA_1	0.99130341421516	interacts with	WDR5 (interacts with) MAN1B1
106788	0.412182033740765	4	0.484180030553851	BRCA_1	0.851299119604896	interacts with	XRN2 (interacts with) STT3B
106789	0.427744177559035	4	0.443308030464544	BRCA_1	0.964891561090831	interacts with	XRN2 (interacts with) MAN2A1
106790	0.400930092675436	4	0.462161247918195	BRCA_1	0.867511273351943	interacts with	XRN2 (interacts with) MAN1A2
106791	0.282994950158238	4	0.448763933902074	BRCA_1	0.630609834657505	interacts with	XRN2 (interacts with) NEU3
106792	0.354262818904769	4	0.433047299071989	BRCA_1	0.818069572686279	interacts with	XRN2 (interacts with) UGGT1
106793	0.287943268502374	4	0.43354406770629	BRCA_1	0.664161477345931	interacts with	XRN2 (interacts with) POFUT1
106794	0.272964535848435	4	0.402787022638201	BRCA_1	0.677689499677904	interacts with	XRN2 (interacts with) SLC35A3
106795	0.442360940691213	2	0.498023667544779	BRCA_1	0.888232767876315	interacts with	YAP1 (interacts with) GALNT10
106796	0.302456694691481	2	0.412910466010473	BRCA_1	0.732499463173717	interacts with	YAP1 (interacts with) B3GNT5
106797	0.455235933135269	2	0.466993499776628	BRCA_1	0.974822847326605	interacts with	YAP1 (interacts with) DSE
106798	0.398755627535747	2	0.516516224861685	BRCA_1	0.772009877603608	interacts with	YAP1 (interacts with) CHSY1
106799	0.372095036296699	2	0.47805961349989	BRCA_1	0.778344427743182	interacts with	YAP1 (interacts with) CHST3
106800	0.414915341493708	2	0.431404497730788	BRCA_1	0.961777968649345	interacts with	YAP1 (interacts with) CSGALNACT1
106801	0.239929241045256	2	0.408687079571235	BRCA_1	0.587073223105003	interacts with	YAP1 (interacts with) GALNT5
106802	0.316128577586237	3	0.42057157143811	BRCA_1	0.751664161477346	interacts with	YY1 (interacts with) GNPNAT1
106803	0.521806981745606	1	0.551314188415697	BRCA_1	0.946478419583423	interacts with	ZBTB17 (interacts with) RFNG
106804	0.389058415285768	1	0.543975092692583	BRCA_1	0.71521365686064	interacts with	ZBTB17 (interacts with) B3GALT6
106805	0.418376862587874	1	0.551792990391313	BRCA_1	0.758213442130127	interacts with	ZBTB17 (interacts with) PIGQ
106806	0.489523814121867	1	0.507504987169531	BRCA_1	0.964569465321022	interacts with	ZBTB17 (interacts with) B3GAT3
106807	0.486523578764948	1	0.50821293249781	BRCA_1	0.957322310500322	interacts with	ZBTB17 (interacts with) DPM3
106808	0.386830258792071	1	0.557169570925439	BRCA_1	0.694277431823062	interacts with	ZBTB17 (interacts with) IDUA
106809	0.573557946165985	1	0.573588737917001	BRCA_1	0.999946317371698	interacts with	ZBTB17 (interacts with) MOGS
106810	0.399156870956492	1	0.465649686383863	BRCA_1	0.857204208718059	interacts with	ZBTB17 (interacts with) POMT1
106811	0.451539046568334	1	0.528412448767114	BRCA_1	0.854520077302985	interacts with	ZBTB17 (interacts with) B4GALT7
106812	0.362500826452772	1	0.406713569545397	BRCA_1	0.8912926776895	interacts with	ZBTB17 (interacts with) GALK1
106813	0.516945134966696	1	0.534832211838912	BRCA_1	0.966555722568177	interacts with	ZBTB17 (interacts with) FKRP
106814	0.403940514008619	1	0.455649987583417	BRCA_1	0.886514923770668	interacts with	ZBTB17 (interacts with) CHST12
106815	0.374601963003005	1	0.401801426085103	BRCA_1	0.932306205711832	interacts with	ZBTB17 (interacts with) B4GALT2
106816	0.455946733158933	1	0.463232928567472	BRCA_1	0.984270989907666	interacts with	ZBTB17 (interacts with) B3GALT4
106817	0.481942387070918	1	0.490902383330985	BRCA_1	0.981747906377496	interacts with	ZBTB17 (interacts with) HYAL2
106818	0.38504990824965	4	0.531272475436966	BRCA_1	0.724769164698304	interacts with	ZBTB33 (interacts with) ALG10
106819	0.344575745611519	4	0.408369830083432	BRCA_1	0.843783551642688	interacts with	ZBTB33 (interacts with) C1GALT1C1
106820	0.360330965959641	4	0.482686986473191	BRCA_1	0.746510629160404	interacts with	ZBTB33 (interacts with) SLC35A3
106821	0.394216785830654	4	0.510034052399876	BRCA_1	0.772922482284733	interacts with	ZBTB33 (interacts with) SLC35A5
106822	0.341257345888379	4	0.475320909167693	BRCA_1	0.717951470904015	interacts with	ZBTB33 (interacts with) SLC35F5
106823	0.379520164997627	4	0.516375840594244	BRCA_1	0.734968864075585	interacts with	ZBTB33 (interacts with) UGGT1
106824	0.334683788161758	4	0.445734582532153	BRCA_1	0.750858922052824	interacts with	ZBTB33 (interacts with) PIGN
106895	0.585511059998007	2	0.729493654050743	BRCA_2	0.802626666793841	interacts with	ADNP (interacts with) FUT7
106896	0.508617921961081	1	0.643344513498405	BRCA_2	0.79058406699592	interacts with	AFF4 (interacts with) MAN1A2
106897	0.567971339884298	1	0.590872898434307	BRCA_2	0.96124114236633	interacts with	AFF4 (interacts with) STT3B
106898	0.406782378610295	1	0.506520197109129	BRCA_2	0.803092119390165	interacts with	AFF4 (interacts with) NEU3
106899	0.577978484288444	1	0.595036100659066	BRCA_2	0.971333476487009	interacts with	AFF4 (interacts with) FUT11
106900	0.470868768528238	1	0.772057338275154	BRCA_2	0.609888340133133	interacts with	AFF4 (interacts with) MAN2A1
106901	0.537443091186376	1	0.662836990374723	BRCA_2	0.810822417865579	interacts with	AFF4 (interacts with) ACER2
106902	0.410446810165905	1	0.451506034000855	BRCA_2	0.90906162765729	interacts with	AFF4 (interacts with) COG5
106903	0.455569509906879	1	0.60272363853305	BRCA_2	0.755851406484861	interacts with	AFF4 (interacts with) UGCG
106904	0.494410143918789	1	0.541852807020016	BRCA_2	0.912443633240283	interacts with	AFF4 (interacts with) GALNT10
106905	0.37230803673185	1	0.528730205705642	BRCA_2	0.704155035430535	interacts with	AFF4 (interacts with) UGGT1
106906	0.408775544491472	1	0.612161013167228	BRCA_2	0.66775821344213	interacts with	AFF4 (interacts with) SLC35A3
106907	0.372309172409808	1	0.469717254564843	BRCA_2	0.792624006871376	interacts with	AFF4 (interacts with) SLC35D1
106908	0.328485956820428	1	0.508859576187188	BRCA_2	0.645533605325317	interacts with	AFF4 (interacts with) SLC35A5
106909	0.315023559765947	1	0.494169168111163	BRCA_2	0.637481211080094	interacts with	AFF4 (interacts with) SLC35F5
106910	0.363255689834324	1	0.463919305514452	BRCA_2	0.783014816405411	interacts with	AFF4 (interacts with) HS2ST1
106911	0.313822607939259	1	0.512662241576122	BRCA_2	0.612143010521795	interacts with	AFF4 (interacts with) PIGK
106912	0.470423207395976	1	0.470852886878338	BRCA_2	0.999087444307263	interacts with	AHR (interacts with) UGCG
106913	0.423870114353565	1	0.464459523574646	BRCA_2	0.912609372483762	interacts with	AHR (interacts with) HAS2
106914	0.401862520881267	2	0.427568501998807	BRCA_2	0.939878683772613	interacts with	ASCL2 (interacts with) GM2A
106915	0.275549411692894	1	0.446419763525416	BRCA_2	0.617242860210436	interacts with	ATF1 (interacts with) SLC35A3
106916	0.508781971190525	1	0.680714685005896	BRCA_2	0.747423233841529	interacts with	ATF2 (interacts with) MAN1A2
106917	0.563838370246516	1	0.64157236338355	BRCA_2	0.878838307923556	interacts with	ATF2 (interacts with) MAN2A1
106918	0.518223413246418	1	0.547279649750795	BRCA_2	0.946907880609835	interacts with	ATF2 (interacts with) FUT11
106919	0.46476454571814	1	0.488056483321355	BRCA_2	0.952276143439983	interacts with	ATF2 (interacts with) SLC35F5
106920	0.378063913497229	1	0.531675568520789	BRCA_2	0.711080094481426	interacts with	ATF2 (interacts with) ACER2
106921	0.422522598526207	1	0.638393297538015	BRCA_2	0.661853124328967	interacts with	ATF2 (interacts with) NEU3
106922	0.46829993856097	1	0.687213743147452	BRCA_2	0.681447283659008	interacts with	ATF2 (interacts with) UGGT1
106923	0.340106022153188	1	0.439385184872015	BRCA_2	0.774049817479064	interacts with	ATF2 (interacts with) COG5
106924	0.278996862436142	1	0.548396491870893	BRCA_2	0.508750268413142	interacts with	ATF2 (interacts with) SLC35A3
106925	0.305298649238784	1	0.520035043710687	BRCA_2	0.587073223105003	interacts with	ATF2 (interacts with) FKTN
106926	0.321516106514893	1	0.516622274834764	BRCA_2	0.622342709899077	interacts with	ATF2 (interacts with) SLC35A5
106927	0.518949915652581	1	0.566246001211968	BRCA_2	0.916474314241237	interacts with	ATF7IP (interacts with) ALG10
106928	0.493949647874169	1	0.505954142533012	BRCA_2	0.976273551988835	interacts with	ATRX (interacts with) PIGK
106929	0.377930540307563	1	0.458787233942605	BRCA_2	0.823759931286236	interacts with	BACH1 (interacts with) CSGALNACT2
106930	0.324127098352961	1	0.553727034860506	BRCA_2	0.585355378999356	interacts with	BACH1 (interacts with) UGCG
106931	0.493952846614892	1	0.526152426048845	BRCA_2	0.938801803736311	interacts with	BACH1 (interacts with) MAN1A2
106932	0.460558295221333	1	0.513022778411947	BRCA_2	0.897734593085677	interacts with	BACH1 (interacts with) FUT11
106933	0.355274409052074	1	0.443866645997454	BRCA_2	0.800407987975091	interacts with	BACH1 (interacts with) ACER2
106934	0.253128497599997	1	0.400346209313359	BRCA_2	0.632273996134851	interacts with	BACH1 (interacts with) B3GNT2
106935	0.537407916547355	2	0.718652883664331	BRCA_2	0.747799012239639	interacts with	BATF (interacts with) FUT7
106936	0.393232286274217	2	0.536561018804286	BRCA_2	0.732875241571827	interacts with	BATF (interacts with) NAGK
106937	0.416945829157021	2	0.487470464164752	BRCA_2	0.855325316727507	interacts with	BATF (interacts with) CHST12
106938	0.425263748300481	2	0.476528699671641	BRCA_2	0.892420012883831	interacts with	BATF (interacts with) ST6GALNAC4
106939	0.281839040328537	2	0.478717757202516	BRCA_2	0.588737384582349	interacts with	BATF (interacts with) RENBP
106940	0.452755656502135	2	0.461626901919888	BRCA_2	0.980782650705889	interacts with	BATF3 (interacts with) MGAT1
106941	0.412190821720135	2	0.414773554681812	BRCA_2	0.993773149390735	interacts with	BATF3 (interacts with) TPST2
106942	0.504047248395722	7	0.512381563062238	BRCA_2	0.983734163624651	interacts with	BCL11A (interacts with) UGT8
106943	0.481641095405373	8	0.546274374403999	BRCA_2	0.881683487223535	interacts with	BRD4 (interacts with) SLC35E1
106944	0.40337909028605	3	0.408266275830644	BRCA_2	0.988029416501154	interacts with	C17orf49 (interacts with) B3GAT3
106945	0.495692383592424	1	0.509110895023887	BRCA_2	0.973643244403886	interacts with	CASP8AP2 (interacts with) ALG10B
106946	0.417686445054128	1	0.432018254672886	BRCA_2	0.966825916581674	interacts with	CASP8AP2 (interacts with) ALG10
106947	0.486464010522339	1	0.495914307323008	BRCA_2	0.980943689945783	interacts with	CASP8AP2 (interacts with) SLC35A5
106948	0.505234426381976	2	0.509197799668353	BRCA_2	0.992216436738419	interacts with	CBFA2T3 (interacts with) LFNG
106949	0.534713210460876	2	0.540369556128657	BRCA_2	0.989532449406839	interacts with	CBFA2T3 (interacts with) ST3GAL2
106950	0.425686306348227	2	0.43435998252512	BRCA_2	0.980031134253046	interacts with	CBFA2T3 (interacts with) TPST2
106951	0.435875523167068	2	0.463413144679792	BRCA_2	0.940576520478823	interacts with	CBX6 (interacts with) ST3GAL2
106952	0.510343824815827	3	0.512158429515636	BRCA_2	0.996456946532102	interacts with	CBX8 (interacts with) RFNG
106953	0.412732185783803	3	0.430648919329002	BRCA_2	0.958395963066352	interacts with	CBX8 (interacts with) GALK1
106954	0.454170450994772	3	0.456818961184158	BRCA_2	0.99420227614344	interacts with	CBX8 (interacts with) B3GAT3
106955	0.399897778912018	3	0.426403510008127	BRCA_2	0.937838853400612	interacts with	CCDC101 (interacts with) B3GAT3
106956	0.555964682475879	1	0.593494130413337	BRCA_2	0.93676525846798	interacts with	CDK12 (interacts with) ACER2
106957	0.450898084546063	1	0.49176402335621	BRCA_2	0.916899291389306	interacts with	CDK8 (interacts with) STT3B
106958	0.352005455563392	1	0.412711330956374	BRCA_2	0.85290959845394	interacts with	CDK8 (interacts with) COG5
106959	0.534758839924306	3	0.593404876994697	BRCA_2	0.901170281296972	interacts with	CDK9 (interacts with) DPM2
106960	0.534469175281354	3	0.625264824288204	BRCA_2	0.854788490444492	interacts with	CDK9 (interacts with) ST6GALNAC6
106961	0.390812505055072	3	0.411349041935014	BRCA_2	0.950075155679622	interacts with	CDK9 (interacts with) TSTA3
106962	0.374591353011429	1	0.593963885248289	BRCA_2	0.630663517285806	interacts with	CHD1 (interacts with) MAN2A1
106963	0.40101523301198	1	0.446590049653086	BRCA_2	0.897949323598883	interacts with	CHD1 (interacts with) SLC35D1
106964	0.341663664300812	1	0.441061035245705	BRCA_2	0.77464032639038	interacts with	CHD1 (interacts with) SLC35A3
106965	0.319607316449812	1	0.503948289387769	BRCA_2	0.634206570753704	interacts with	CHD1 (interacts with) SLC35A5
106966	0.599551751907182	1	0.602527515889457	BRCA_2	0.995061198196264	interacts with	CHD2 (interacts with) MAN1A2
106967	0.45529253549107	1	0.550798113464583	BRCA_2	0.826605110586214	interacts with	CHD2 (interacts with) MAN2A2
106968	0.325208042861662	1	0.631565411011993	BRCA_2	0.514923770667812	interacts with	CHD2 (interacts with) MGAT5
106969	0.493117715440457	4	0.515764972260977	BRCA_2	0.956089967255355	interacts with	CHD4 (interacts with) NEU3
106970	0.460943066575645	4	0.478033089530574	BRCA_2	0.964249288743357	interacts with	CHD4 (interacts with) GANAB
106971	0.48248418227186	1	0.529000314735739	BRCA_2	0.912067854842173	interacts with	CHD8 (interacts with) NEU3
106972	0.37401345142415	1	0.447873654739591	BRCA_2	0.835086965857848	interacts with	CHD8 (interacts with) STT3B
106973	0.366293533552144	1	0.524225256838456	BRCA_2	0.698733089972085	interacts with	CHD8 (interacts with) ACER2
106974	0.344304077725456	1	0.419058893163658	BRCA_2	0.821612626154177	interacts with	CHD8 (interacts with) UGCG
106975	0.683870974739059	2	0.800499466974939	BRCA_2	0.854305346789779	interacts with	CIITA (interacts with) FUT7
106976	0.501390555508009	1	0.544757066287105	BRCA_2	0.920392935745343	interacts with	CLOCK (interacts with) FUT11
106977	0.499985209455818	3	0.637315210191801	BRCA_2	0.784517929997853	interacts with	CPSF3L (interacts with) B3GALT6
106978	0.436092224597672	9	0.459682116903188	BRCA_2	0.948682162220194	interacts with	CREB3 (interacts with) PIGO
106979	0.399316217367551	1	0.426811022327447	BRCA_2	0.935580846038222	interacts with	CTNNB1 (interacts with) STT3B
106980	0.455365111387789	1	0.476519304574942	BRCA_2	0.95560684953567	interacts with	DCP1A (interacts with) STT3B
106981	0.49460263376101	5	0.506122079886507	BRCA_2	0.977239787428203	interacts with	DEK (interacts with) B3GNT5
106982	0.427018620021506	2	0.483321354585042	BRCA_2	0.883508696585785	interacts with	EBF1 (interacts with) MAN1A1
106983	0.408506126032608	3	0.416989623115696	BRCA_2	0.979655376026625	interacts with	EGLN2 (interacts with) GALT
106984	0.512844271574665	3	0.512844271574665	BRCA_2	1.0	interacts with	EHMT2 (interacts with) B4GALNT4
106985	0.520818096814583	1	0.606931467467129	BRCA_2	0.858116813399184	interacts with	ELF1 (interacts with) COG3
106986	0.302453340130828	1	0.423330139000456	BRCA_2	0.714462100064419	interacts with	ELF1 (interacts with) SLC35A3
106987	0.402616664200832	1	0.555921964326818	BRCA_2	0.724232338415289	interacts with	ELF1 (interacts with) UGCG
106988	0.400057552431713	1	0.563030529366724	BRCA_2	0.710543268198411	interacts with	ELF1 (interacts with) MAN1A1
106989	0.402996620105515	1	0.425542684273078	BRCA_2	0.947018090074615	interacts with	ELF2 (interacts with) SLC35A5
106990	0.539001941735607	1	0.573873645344495	BRCA_2	0.939234526813033	interacts with	ELK3 (interacts with) FUT11
106991	0.351738962999952	1	0.458195342850566	BRCA_2	0.767661584711188	interacts with	ELK4 (interacts with) ALG10
106992	0.300919177466164	1	0.408804145116664	BRCA_2	0.736096199269916	interacts with	ELK4 (interacts with) FAM20B
106993	0.401639314276	1	0.506858420590294	BRCA_2	0.79240927635817	interacts with	ELK4 (interacts with) UGGT1
106994	0.38067402120364	10	0.526834744946612	BRCA_2	0.722568176937943	interacts with	ELL2 (interacts with) CSGALNACT1
106995	0.308561266408559	1	0.455927601384837	BRCA_2	0.676776894996779	interacts with	ERCC6 (interacts with) MAN1A2
106996	0.332827209568654	1	0.449235943760951	BRCA_2	0.740873953188748	interacts with	ERCC6 (interacts with) CSGALNACT2
106997	0.517019513725793	2	0.521047365380008	BRCA_2	0.992269701524587	interacts with	ERG (interacts with) MFNG
106998	0.505610110917125	2	0.628738661292671	BRCA_2	0.804165771956195	interacts with	ERG (interacts with) CHSY3
106999	0.51191138381383	2	0.520915834026222	BRCA_2	0.982714193686923	interacts with	ERG (interacts with) MAN1C1
107000	0.36526176804731	2	0.556344743678274	BRCA_2	0.65653854412712	interacts with	ERG (interacts with) CHST7
107001	0.311910995701215	2	0.446223640881824	BRCA_2	0.699001503113592	interacts with	ERG (interacts with) XYLT1
107002	0.286241038545166	2	0.445083311019979	BRCA_2	0.64311788705175	interacts with	ERG (interacts with) MAN1A1
107003	0.533755771376178	2	0.567803238489832	BRCA_2	0.940036504187245	interacts with	ETS1 (interacts with) MFNG
107004	0.582374148266624	2	0.602525167115283	BRCA_2	0.966555722568177	interacts with	ETS1 (interacts with) ST8SIA4
107005	0.65154216507748	2	0.81928766376828	BRCA_2	0.795254455658149	interacts with	FLI1 (interacts with) MFNG
107006	0.727096239568768	2	0.831247621866148	BRCA_2	0.874704745544342	interacts with	FLI1 (interacts with) ST8SIA4
107007	0.579981168832925	2	0.601351954414991	BRCA_2	0.964462100064419	interacts with	FLI1 (interacts with) ST3GAL2
107008	0.441606948654573	2	0.454916454102604	BRCA_2	0.970742967575693	interacts with	FLI1 (interacts with) ST6GAL1
107009	0.543819305750822	2	0.65815137912723	BRCA_2	0.826283014816405	interacts with	FLI1 (interacts with) FUT7
107010	0.481864736331579	2	0.603562150913438	BRCA_2	0.798368048099635	interacts with	FLI1 (interacts with) MAN1C1
107011	0.511957510848676	2	0.56167880982915	BRCA_2	0.911477345930857	interacts with	FLI1 (interacts with) FUCA1
107012	0.533451876021412	2	0.680719382554245	BRCA_2	0.783659007945029	interacts with	FLI1 (interacts with) ST3GAL5
107013	0.539669162210732	2	0.541909177600211	BRCA_2	0.995866437620786	interacts with	FLI1 (interacts with) TPST2
107014	0.425120119019676	2	0.626018780798302	BRCA_2	0.679085248013743	interacts with	FLI1 (interacts with) GCNT4
107015	0.506908978181364	2	0.531115385880109	BRCA_2	0.954423448572042	interacts with	FOXA1 (interacts with) GALNT7
107016	0.432036376345741	2	0.479960258740963	BRCA_2	0.900150311359244	interacts with	FOXA1 (interacts with) MGAT4A
107017	0.340274508369362	2	0.447359273195319	BRCA_2	0.760629160403693	interacts with	FOXA1 (interacts with) GALNT10
107018	0.394250766856106	2	0.423902065512009	BRCA_2	0.930051535323169	interacts with	FOXA1 (interacts with) LFNG
107019	0.527245094569501	2	0.552733503384584	BRCA_2	0.953886622289027	interacts with	FOXO1 (interacts with) CHST15
107020	0.455909919003866	2	0.713731403580471	BRCA_2	0.63876959415933	interacts with	FOXO1 (interacts with) GCNT4
107021	0.686818951191423	2	0.752105309669851	BRCA_2	0.913195190036504	interacts with	FOXP3 (interacts with) FUT7
107022	0.663041472299048	2	0.665076546550356	BRCA_2	0.996940090186816	interacts with	FOXP3 (interacts with) ST8SIA4
107023	0.598839958528768	2	0.753678180357671	BRCA_2	0.79455658149023	interacts with	FOXP3 (interacts with) MFNG
107024	0.468631471323688	3	0.503933022355633	BRCA_2	0.929947930645767	interacts with	FUS (interacts with) B4GALNT4
107025	0.398600356290521	3	0.401141269371515	BRCA_2	0.993665789897472	interacts with	FUS (interacts with) B3GAT3
107026	0.294510109099335	1	0.418916792326085	BRCA_2	0.703027700236204	interacts with	GABPA (interacts with) ALG10B
107027	0.31470425571876	1	0.426691234844535	BRCA_2	0.737545630234056	interacts with	GABPA (interacts with) PIGK
107028	0.425790043012721	11	0.446247128623571	BRCA_2	0.954157496376617	interacts with	GAPDH (interacts with) GPI
107029	0.403930144051336	6	0.438202577075025	BRCA_2	0.921788609157765	interacts with	GLYR1 (interacts with) COG7
107030	0.483226838015983	6	0.506785608590877	BRCA_2	0.953513339417038	interacts with	GLYR1 (interacts with) ALG1
107031	0.46114502774305	3	0.48885624092786	BRCA_2	0.943314187557035	interacts with	GPS2 (interacts with) GALK1
107032	0.461181360048062	3	0.465025578150763	BRCA_2	0.991733319018734	interacts with	GPS2 (interacts with) NAGK
107033	0.479964078446155	3	0.528536431836225	BRCA_2	0.908100273766708	interacts with	GPS2 (interacts with) CHST12
107034	0.38059010337091	5	0.405885793204527	BRCA_2	0.937677814160717	interacts with	GRHL1 (interacts with) B3GNT5
107035	0.510051321041027	1	0.57006275924595	BRCA_2	0.894728365900795	interacts with	GTF2I (interacts with) COG5
107036	0.421182735078157	1	0.449744453369786	BRCA_2	0.936493450719347	interacts with	GTF2I (interacts with) UGGT1
107037	0.391671287780246	3	0.463359122873772	BRCA_2	0.84528666523513	interacts with	H2AFX (interacts with) B3GAT3
107038	0.331322663360142	3	0.430876750423954	BRCA_2	0.768949967790423	interacts with	H2AFX (interacts with) RFNG
107039	0.291681689276496	4	0.487348327907665	BRCA_2	0.598507622933219	interacts with	HCFC1 (interacts with) NEU3
107040	0.466674051795673	1	0.469572804953095	BRCA_2	0.993826829137366	interacts with	HECTD1 (interacts with) FUT11
107041	0.425437526227637	1	0.436088680317742	BRCA_2	0.975575715282624	interacts with	HECTD1 (interacts with) UGCG
107042	0.422526148330225	3	0.432771036795896	BRCA_2	0.976327231735466	interacts with	HES4 (interacts with) GALK1
107043	0.272772042151435	1	0.436116865607839	BRCA_2	0.625456302340563	interacts with	HIF1A (interacts with) STT3B
107044	0.437392721870461	1	0.457199462600469	BRCA_2	0.956678118960704	interacts with	HIF1A (interacts with) FUT11
107045	0.288791429096884	1	0.408753646471906	BRCA_2	0.7065170710758	interacts with	HIF1A (interacts with) SLC35F5
107046	0.321005276880031	1	0.401428994207923	BRCA_2	0.799656431178871	interacts with	HIF1A (interacts with) MGAT2
107047	0.305332295353185	1	0.453965200561827	BRCA_2	0.672589649989264	interacts with	HIF1A (interacts with) GALC
107048	0.406262569098604	2	0.418159312654726	BRCA_2	0.971549734285254	interacts with	HOXB4 (interacts with) TPST2
107049	0.392384048372702	2	0.401831808978894	BRCA_2	0.976488270975361	interacts with	HOXB4 (interacts with) LFNG
107050	0.433082905439671	2	0.453456690952992	BRCA_2	0.955070052069354	interacts with	HOXB4 (interacts with) MGAT1
107051	0.548134266390103	3	0.559487403524101	BRCA_2	0.97970796650204	interacts with	HSF1 (interacts with) TSTA3
107052	0.35014932126292	3	0.405532302691225	BRCA_2	0.863431393601031	interacts with	HSF1 (interacts with) RFNG
107053	0.324320568097228	3	0.427319531936283	BRCA_2	0.758964998926347	interacts with	HSF1 (interacts with) B4GALT2
107054	0.69108894742839	2	0.812419848081286	BRCA_2	0.850654928065278	interacts with	IKZF1 (interacts with) MFNG
107055	0.642960305903562	2	0.780315628273604	BRCA_2	0.823974661799442	interacts with	IKZF1 (interacts with) ST8SIA4
107056	0.562505519329308	2	0.603522221752468	BRCA_2	0.932037792570324	interacts with	IKZF1 (interacts with) LAMP3
107057	0.618858514734932	2	0.654819449729186	BRCA_2	0.945082671247584	interacts with	IKZF1 (interacts with) ST3GAL5
107058	0.489045691542257	2	0.504733954349225	BRCA_2	0.968917758213442	interacts with	IKZF1 (interacts with) ST6GAL1
107059	0.526854899100964	2	0.58526167693081	BRCA_2	0.900203993987546	interacts with	IKZF1 (interacts with) FUCA1
107060	0.519481595197725	2	0.672287283266863	BRCA_2	0.772707751771527	interacts with	IKZF1 (interacts with) NPL
107061	0.538776340290661	2	0.565777420764103	BRCA_2	0.952276143439983	interacts with	IKZF1 (interacts with) UGCG
107062	0.39689550450052	1	0.430295428815701	BRCA_2	0.922379086370712	interacts with	INO80 (interacts with) RTF1
107063	0.452028020724355	1	0.49058141555922	BRCA_2	0.921412850931344	interacts with	INO80 (interacts with) MAN2A1
107064	0.430885563464935	1	0.45748131550144	BRCA_2	0.941864834397982	interacts with	INO80 (interacts with) HS3ST3B1
107065	0.568483865786015	2	0.645635742705882	BRCA_2	0.880502469400902	interacts with	IRF1 (interacts with) HK3
107066	0.410581614046965	2	0.435775118965412	BRCA_2	0.942186912877771	interacts with	IRF2 (interacts with) LAMP3
107067	0.4496010124739	2	0.464976253893093	BRCA_2	0.966933276074937	interacts with	IRF2 (interacts with) ST8SIA4
107068	0.4123236762946	3	0.427136327550651	BRCA_2	0.965321022117243	interacts with	IRF3 (interacts with) B3GAT3
107069	0.432396671217983	3	0.513102636733889	BRCA_2	0.842709899076659	interacts with	IRF3 (interacts with) GALK1
107070	0.435517797313547	3	0.492283102448832	BRCA_2	0.884689714408417	interacts with	IRF3 (interacts with) GALT
107071	0.33242576815222	3	0.497943648209999	BRCA_2	0.667597165557226	interacts with	IRF3 (interacts with) B4GALT7
107072	0.358244499183744	3	0.412293249153267	BRCA_2	0.868907021687782	interacts with	IRF3 (interacts with) MGAT1
107073	0.442040297300683	2	0.627042846338496	BRCA_2	0.704960274855057	interacts with	IRF4 (interacts with) ST3GAL5
107074	0.404483784265848	2	0.513579437891365	BRCA_2	0.787577839811037	interacts with	IRF5 (interacts with) HK3
107075	0.558960957408326	2	0.567583794745287	BRCA_2	0.984807816190681	interacts with	IRF5 (interacts with) FUT7
107076	0.357328279296846	2	0.5095935681168	BRCA_2	0.701202490873953	interacts with	IRF5 (interacts with) MGAT1
107077	0.556720502535104	2	0.564446840194103	BRCA_2	0.986311664608943	interacts with	IRF8 (interacts with) HK3
107078	0.715513145101081	2	0.757647608713013	BRCA_2	0.944387782489667	interacts with	IRF8 (interacts with) ST8SIA4
107079	0.563176016756142	2	0.586472470017898	BRCA_2	0.960276987492619	interacts with	IRF8 (interacts with) LIPA
107080	0.538785054649843	2	0.553492157443031	BRCA_2	0.97342852541736	interacts with	IRF8 (interacts with) FUCA1
107081	0.565061544680438	2	0.589193524899355	BRCA_2	0.959042353320092	interacts with	IRF8 (interacts with) GM2A
107082	0.451587079191962	2	0.458403209365032	BRCA_2	0.985130710183048	interacts with	IRF8 (interacts with) ST6GAL1
107083	0.409963943806133	2	0.412465884055112	BRCA_2	0.99393418863063	interacts with	IRF8 (interacts with) DSE
107084	0.453968592598222	2	0.456591130089206	BRCA_2	0.994256267110419	interacts with	IRF8 (interacts with) TPST2
107085	0.451505718481644	2	0.466816518459016	BRCA_2	0.967201674808095	interacts with	JDP2 (interacts with) MGAT1
107086	0.48610663661309	1	0.513799048276705	BRCA_2	0.946102641185312	interacts with	JMJD1C (interacts with) FUT11
107087	0.574224553567958	1	0.575460242299544	BRCA_2	0.997852694867941	interacts with	JMJD1C (interacts with) CSGALNACT2
107088	0.292360372163909	1	0.44251962400823	BRCA_2	0.660672106506335	interacts with	JMJD1C (interacts with) SLC35A5
107089	0.237850370885261	1	0.452988110505127	BRCA_2	0.525069787416792	interacts with	JMJD1C (interacts with) COG5
107090	0.237058405855304	1	0.450788483490466	BRCA_2	0.525875026841314	interacts with	JMJD1C (interacts with) SLC35A3
107091	0.435895601699602	3	0.503807362937283	BRCA_2	0.86520292033498	interacts with	JMJD6 (interacts with) RFNG
107092	0.396417880219072	3	0.418241519750842	BRCA_2	0.94782048529096	interacts with	JMJD6 (interacts with) GALK1
107093	0.344045675748428	3	0.435267783743664	BRCA_2	0.790423019111016	interacts with	JMJD6 (interacts with) COG1
107094	0.424680673370964	1	0.436513808443373	BRCA_2	0.972891727951044	interacts with	KDM1B (interacts with) EXTL2
107095	0.405758219134263	1	0.406565763328119	BRCA_2	0.998013742752845	interacts with	KDM3A (interacts with) SLC35A3
107096	0.386676627804199	4	0.404004425090545	BRCA_2	0.957109882441355	interacts with	KDM4A (interacts with) GANAB
107097	0.534904118882314	4	0.574570056887311	BRCA_2	0.930964140004295	interacts with	KDM5A (interacts with) NEU3
107098	0.545168101767688	2	0.545168101767688	BRCA_2	1.0	interacts with	LEF1 (interacts with) ST8SIA4
107099	0.54451749132128	2	0.54451749132128	BRCA_2	1.0	interacts with	LEF1 (interacts with) MFNG
107100	0.554192092147109	2	0.554192092147109	BRCA_2	1.0	interacts with	LEF1 (interacts with) GCNT4
107101	0.727749397882888	2	0.822703955805465	BRCA_2	0.884582349151814	interacts with	LYL1 (interacts with) MFNG
107102	0.753244065148365	2	0.770576662396823	BRCA_2	0.977506978741679	interacts with	LYL1 (interacts with) FUT7
107103	0.487358656814839	2	0.524891134317	BRCA_2	0.928494739102426	interacts with	LYL1 (interacts with) MAN2B1
107104	0.644252422711639	2	0.670566806183853	BRCA_2	0.960757998711617	interacts with	LYL1 (interacts with) MGAT1
107105	0.511270402799358	2	0.536167599130014	BRCA_2	0.953564526519218	interacts with	LYL1 (interacts with) RENBP
107106	0.621961797308588	2	0.628473249810924	BRCA_2	0.989639252737814	interacts with	LYL1 (interacts with) CHST12
107107	0.538645469009496	2	0.548599660837009	BRCA_2	0.981855271634099	interacts with	LYL1 (interacts with) ST6GALNAC6
107108	0.643411863727857	2	0.649936348219864	BRCA_2	0.989961348507623	interacts with	LYL1 (interacts with) ST3GAL2
107109	0.372053854554334	2	0.526003278888748	BRCA_2	0.707322310500322	interacts with	LYL1 (interacts with) IDUA
107110	0.352853357240415	2	0.524786613866223	BRCA_2	0.672374919476058	interacts with	LYL1 (interacts with) NAGK
107111	0.478822967608859	2	0.517013345734861	BRCA_2	0.926132703457161	interacts with	LYL1 (interacts with) ST6GALNAC4
107112	0.30974531930437	2	0.478832847137079	BRCA_2	0.646875671032854	interacts with	LYL1 (interacts with) B3GALT4
107113	0.632125244892238	2	0.656111275525303	BRCA_2	0.963442130126691	interacts with	MAF (interacts with) ST8SIA4
107114	0.511248011585129	2	0.514590585173598	BRCA_2	0.993504401975521	interacts with	MAF (interacts with) TPST2
107115	0.447874288677889	2	0.44895878840833	BRCA_2	0.997584411401578	interacts with	MAFB (interacts with) DSE
107116	0.459263537645118	2	0.49546099390728	BRCA_2	0.926941864834398	interacts with	MAFB (interacts with) GALNT10
107117	0.394997211273237	3	0.492866772831259	BRCA_2	0.801427957912819	interacts with	MAZ (interacts with) B4GALT2
107118	0.455076968507611	3	0.460991558505616	BRCA_2	0.987169851835946	interacts with	MAZ (interacts with) B3GAT3
107119	0.247725251299142	3	0.409824687495596	BRCA_2	0.604466394674683	interacts with	MAZ (interacts with) B4GALNT4
107120	0.401417106919226	1	0.413263292887442	BRCA_2	0.971335015298728	interacts with	MED1 (interacts with) FUT11
107121	0.428175219318037	2	0.545035396026814	BRCA_2	0.785591582563882	interacts with	MEF2A (interacts with) CHSY1
107122	0.315706440828716	2	0.562719316788568	BRCA_2	0.561037148378785	interacts with	MEF2A (interacts with) XYLT1
107123	0.474074164384683	2	0.528015158992997	BRCA_2	0.89784195834228	interacts with	MEF2B (interacts with) CHST12
107124	0.430491569666425	2	0.450541994479811	BRCA_2	0.955497101138072	interacts with	MEF2B (interacts with) ST6GALNAC4
107125	0.472289961749519	2	0.514281721369617	BRCA_2	0.918348722353446	interacts with	MEF2C (interacts with) MAN1A1
107126	0.405899011111502	2	0.437638871273083	BRCA_2	0.927474769164698	interacts with	MEF2C (interacts with) GALNT10
107127	0.364048618053348	2	0.477469383728632	BRCA_2	0.762454369765944	interacts with	MEF2C (interacts with) XYLT1
107128	0.426414582872711	2	0.427539142321622	BRCA_2	0.997369692415052	interacts with	MEIS3 (interacts with) ST3GAL2
107129	0.56396454786763	4	0.603382469689069	BRCA_2	0.934671748349348	interacts with	MRE11A (interacts with) NEU3
107130	0.410087465826114	2	0.419431173870357	BRCA_2	0.977722905147888	interacts with	MSX1 (interacts with) ST3GAL2
107131	0.469684642171434	3	0.516789037801172	BRCA_2	0.90885179021955	interacts with	MXD3 (interacts with) B3GAT3
107132	0.445640924748006	3	0.471508194873096	BRCA_2	0.945139298942509	interacts with	MXD3 (interacts with) NAGK
107133	0.373153226691986	12	0.406613913198702	BRCA_2	0.917708948413763	interacts with	MYBL1 (interacts with) FUT1
107134	0.460539900756287	2	0.467313284196978	BRCA_2	0.9855056903586	interacts with	MYH11 (interacts with) XYLT1
107135	0.416653074754703	1	0.435446290580946	BRCA_2	0.956841483708197	interacts with	NFAT5 (interacts with) COG5
107136	0.392706482717814	13	0.428170962574632	BRCA_2	0.917172150947448	interacts with	NFYC (interacts with) ST3GAL3
107137	0.399879027047427	13	0.403343245160351	BRCA_2	0.991411240538945	interacts with	NFYC (interacts with) MOGS
107138	0.449285735932566	1	0.510260619982431	BRCA_2	0.880502469400902	interacts with	NIPBL (interacts with) NEU3
107139	0.467304535996666	1	0.566175537986725	BRCA_2	0.82537041013528	interacts with	NIPBL (interacts with) UGGT1
107140	0.403515652913995	1	0.620547311358202	BRCA_2	0.650257676615847	interacts with	NIPBL (interacts with) MGAT5
107141	0.262668595106091	1	0.412319085669189	BRCA_2	0.637051750053683	interacts with	NIPBL (interacts with) COG5
107142	0.30146839949693	1	0.510987565589519	BRCA_2	0.589972085033283	interacts with	NIPBL (interacts with) MAN2A1
107143	0.37552154525507	1	0.467251041681347	BRCA_2	0.803682628301482	interacts with	NIPBL (interacts with) UGCG
107144	0.322742642491629	1	0.522151289242145	BRCA_2	0.61810178226326	interacts with	NIPBL (interacts with) ACER2
107145	0.305828985501168	1	0.456196536027847	BRCA_2	0.670388662228903	interacts with	NIPBL (interacts with) SLC35A3
107146	0.451752870636582	1	0.481034822925915	BRCA_2	0.93912716731977	interacts with	NPAT (interacts with) FUT11
107147	0.490129202642794	1	0.599876924233243	BRCA_2	0.817049602748551	interacts with	NR2C2 (interacts with) STT3B
107148	0.473023960487903	1	0.553520342733128	BRCA_2	0.854573759931286	interacts with	NR2C2 (interacts with) FKTN
107149	0.469698644929992	1	0.511938819130296	BRCA_2	0.917489800300623	interacts with	NR2C2 (interacts with) ALG10B
107150	0.452709175321563	3	0.453366263147264	BRCA_2	0.998550646840947	interacts with	PCGF1 (interacts with) RFNG
107151	0.403283827313904	1	0.423016577648126	BRCA_2	0.953352300177143	interacts with	PHF6 (interacts with) FAM20B
107152	0.410271120890434	1	0.425056488018903	BRCA_2	0.965215524182726	interacts with	PHF6 (interacts with) ALG6
107153	0.348783241331642	1	0.434329448460848	BRCA_2	0.803038436761864	interacts with	PIAS1 (interacts with) MGAT5
107154	0.461249247642039	1	0.523369128651757	BRCA_2	0.881307708825424	interacts with	PIAS1 (interacts with) UGCG
107155	0.342241186236005	1	0.443096248068133	BRCA_2	0.772385656001718	interacts with	PIAS1 (interacts with) SLC35A5
107156	0.263167104772311	1	0.42998656501172	BRCA_2	0.612035645265192	interacts with	POLR2B (interacts with) FKTN
107157	0.303791770899763	1	0.433409903371431	BRCA_2	0.700934077732446	interacts with	POLR2B (interacts with) NEU3
107158	0.299879783867061	1	0.453864203272312	BRCA_2	0.660725789134636	interacts with	POLR3A (interacts with) FUT11
107159	0.442085805140773	2	0.459474250388722	BRCA_2	0.962155778624725	interacts with	POU2F2 (interacts with) MAN1A1
107160	0.438411433203989	14	0.479068898941642	BRCA_2	0.915132320575447	interacts with	PPARA (interacts with) GFPT1
107161	0.50295966369514	2	0.535960907002635	BRCA_2	0.938426025338201	interacts with	PRDM1 (interacts with) SULF1
107162	0.357051375994878	2	0.549500415733029	BRCA_2	0.649774532961134	interacts with	PRDM1 (interacts with) CHST11
107163	0.380675172201334	2	0.563197292333131	BRCA_2	0.675917972943955	interacts with	PRDM1 (interacts with) NPL
107164	0.402155823813709	4	0.50385786158204	BRCA_2	0.798153317586429	interacts with	PRKDC (interacts with) NEU3
107165	0.429744562029433	3	0.466152989754647	BRCA_2	0.921895968651028	interacts with	RAC3 (interacts with) GALK1
107166	0.391415631251408	2	0.433334742597838	BRCA_2	0.90326390380073	interacts with	RARA (interacts with) LFNG
107167	0.487222764820831	1	0.520412021965736	BRCA_2	0.93622503757784	interacts with	RBBP5 (interacts with) MAN1A2
107168	0.449631573827411	1	0.583065573077411	BRCA_2	0.771150955550784	interacts with	RBBP5 (interacts with) FAM20B
107169	0.4149868313961	1	0.510457917013111	BRCA_2	0.812969722997638	interacts with	RBBP5 (interacts with) UGGT1
107170	0.458988902709284	1	0.475954424385913	BRCA_2	0.964354734807816	interacts with	RBBP5 (interacts with) SLC35A3
107171	0.318239300998995	1	0.550126364050602	BRCA_2	0.578484002576766	interacts with	RBBP5 (interacts with) NEU3
107172	0.448624430292266	1	0.544215673839823	BRCA_2	0.824350440197552	interacts with	RBBP5 (interacts with) HS2ST1
107173	0.291962812504064	1	0.512261775579325	BRCA_2	0.569948464676831	interacts with	RBBP5 (interacts with) FKTN
107174	0.283773704988228	1	0.448890673957262	BRCA_2	0.632166630878248	interacts with	RBBP5 (interacts with) SLC35A5
107175	0.468655508271508	1	0.55422262621138	BRCA_2	0.845608761004939	interacts with	RBL2 (interacts with) MAN2A1
107176	0.368983232273151	1	0.42389267041531	BRCA_2	0.870463817908525	interacts with	RBL2 (interacts with) COG6
107177	0.38207425172889	1	0.571118533237503	BRCA_2	0.668992913893064	interacts with	RBL2 (interacts with) MAN1A2
107178	0.356782219436335	1	0.518379157917483	BRCA_2	0.688264977453296	interacts with	RBL2 (interacts with) GNS
107179	0.323728577017111	1	0.422949637584145	BRCA_2	0.765406914322525	interacts with	RCOR1 (interacts with) MAN2A1
107180	0.339002938543956	1	0.444120313608328	BRCA_2	0.763313291818767	interacts with	RCOR1 (interacts with) FKTN
107181	0.284413175779236	1	0.427261986969001	BRCA_2	0.665664590938372	interacts with	RCOR1 (interacts with) MAN1A2
107182	0.353811597337828	1	0.403255166128797	BRCA_2	0.877388876959416	interacts with	RCOR1 (interacts with) UGGT1
107183	0.584769851826528	1	0.626793876275972	BRCA_2	0.932953996457137	interacts with	REST (interacts with) FUT11
107184	0.495599905006388	4	0.511837821840781	BRCA_2	0.968275269740727	interacts with	RFX7 (interacts with) NEU3
107185	0.423421354500996	4	0.429180935469778	BRCA_2	0.986580063342101	interacts with	RFX7 (interacts with) GALNT4
107186	0.334414714044753	5	0.496412247448057	BRCA_2	0.673663302555293	interacts with	RNF2 (interacts with) B3GNT5
107187	0.409182843566058	2	0.429252573082109	BRCA_2	0.95324494068388	interacts with	RUNX2 (interacts with) CHST15
107188	0.507337704924933	2	0.541460561732832	BRCA_2	0.936979977454506	interacts with	RUNX2 (interacts with) GALNT10
107189	0.399722197041835	2	0.409842303301907	BRCA_2	0.975307316549466	interacts with	RUNX2 (interacts with) TPST2
107190	0.435178656705193	2	0.486260988229429	BRCA_2	0.894948735841967	interacts with	RUNX3 (interacts with) FUT7
107191	0.26592062999411	4	0.460925792828723	BRCA_2	0.576927206356023	interacts with	SIN3A (interacts with) NEU3
107192	0.381890115298021	3	0.448653447765611	BRCA_2	0.851191754348293	interacts with	SIRT6 (interacts with) DPM2
107193	0.531089345227115	3	0.532662053674188	BRCA_2	0.997047455443419	interacts with	SIRT6 (interacts with) B3GAT3
107194	0.351182578014917	3	0.487795769387956	BRCA_2	0.71993772815117	interacts with	SIRT6 (interacts with) RFNG
107195	0.470326989683144	3	0.501904855855729	BRCA_2	0.937083959630663	interacts with	SIRT6 (interacts with) PIGQ
107196	0.535655951496845	3	0.551190358751767	BRCA_2	0.971816620141722	interacts with	SIRT6 (interacts with) B4GALT7
107197	0.319115797248968	3	0.495374089262814	BRCA_2	0.64419153961778	interacts with	SIRT6 (interacts with) DPM3
107198	0.437683256586217	3	0.471036091263969	BRCA_2	0.929192613270346	interacts with	SIRT6 (interacts with) GALK1
107199	0.341436632732221	3	0.410605654908703	BRCA_2	0.831543912389951	interacts with	SIRT6 (interacts with) B3GALT6
107200	0.323583486498173	3	0.425685959497738	BRCA_2	0.76014601674898	interacts with	SIRT6 (interacts with) IDUA
107201	0.346319803337971	3	0.459032680843868	BRCA_2	0.754455658149023	interacts with	SIRT6 (interacts with) B4GALNT4
107202	0.401175816072105	3	0.441568370467453	BRCA_2	0.908524801374275	interacts with	SIRT6 (interacts with) NAGK
107203	0.404940883169694	3	0.466842354974939	BRCA_2	0.86740390809534	interacts with	SIX5 (interacts with) PIGQ
107204	0.392694764992101	3	0.411331426128703	BRCA_2	0.954691861713549	interacts with	SIX5 (interacts with) B4GALT7
107205	0.466241961365779	3	0.510621156818257	BRCA_2	0.913087824779901	interacts with	SIX5 (interacts with) DPM3
107206	0.306582199035539	3	0.456917609699498	BRCA_2	0.670979171140219	interacts with	SIX5 (interacts with) GALK1
107207	0.54312819139691	1	0.54312819139691	BRCA_2	1.0	interacts with	SMAD2 (interacts with) GALNT1
107208	0.425565287883168	4	0.432814489118129	BRCA_2	0.983251019969938	interacts with	SMC1A (interacts with) NEU3
107209	0.33422742420677	4	0.414817007004045	BRCA_2	0.805722568176938	interacts with	SMC3 (interacts with) NEU3
107210	0.576729552539086	15	0.593192073445817	BRCA_2	0.972247570991465	interacts with	SOX10 (interacts with) EXTL1
107211	0.468796921727096	15	0.514535901423088	BRCA_2	0.911106339578077	interacts with	SOX10 (interacts with) CHST3
107212	0.590604395614057	15	0.62163790529941	BRCA_2	0.950077835632616	interacts with	SOX10 (interacts with) ST3GAL6
107213	0.365271194413926	2	0.408174673637829	BRCA_2	0.894889413785699	interacts with	SPDEF (interacts with) GALNT7
107214	0.629558439233045	2	0.710709327073096	BRCA_2	0.885817049602749	interacts with	SPIB (interacts with) FUT7
107215	0.366466522573179	2	0.562086322148471	BRCA_2	0.651975520721495	interacts with	SPIB (interacts with) CHST2
107216	0.38284016624169	6	0.407120074033362	BRCA_2	0.940361801492297	interacts with	SRCAP (interacts with) COG7
107217	0.631788531130184	2	0.714265749705229	BRCA_2	0.884528666523513	interacts with	STAT1 (interacts with) LAMP3
107218	0.520477277741257	2	0.534950934107489	BRCA_2	0.972943955336053	interacts with	STAT1 (interacts with) HPSE
107219	0.471715642395905	2	0.563891355101773	BRCA_2	0.836536396821988	interacts with	STAT2 (interacts with) LAMP3
107220	0.726360763116448	2	0.729493654050743	BRCA_2	0.995705389735882	interacts with	STAT4 (interacts with) FUT7
107221	0.68001691347391	2	0.747248411054271	BRCA_2	0.910027914966717	interacts with	STAT4 (interacts with) ST8SIA4
107222	0.395333375226951	1	0.563275976267986	BRCA_2	0.701846682413571	interacts with	TAF1 (interacts with) NEU3
107223	0.372953221658699	1	0.515881236582628	BRCA_2	0.722943955336053	interacts with	TAF1 (interacts with) MAN1A2
107224	0.406883946575776	1	0.543406521136619	BRCA_2	0.748765299549066	interacts with	TAF1 (interacts with) OGT
107225	0.280791509364237	1	0.429052927277254	BRCA_2	0.654444921623363	interacts with	TAF1 (interacts with) STT3B
107226	0.422601467621835	1	0.524220559290107	BRCA_2	0.80615202920335	interacts with	TAF1 (interacts with) UGCG
107227	0.45058531679394	1	0.530026729050109	BRCA_2	0.850118101782263	interacts with	TAF1 (interacts with) ACER2
107228	0.302033617854971	1	0.428701785538128	BRCA_2	0.704530813828645	interacts with	TAF1 (interacts with) ALG10B
107229	0.299784099437147	1	0.509244775151848	BRCA_2	0.588683701954048	interacts with	TAF1 (interacts with) FKTN
107230	0.295981564045324	1	0.401686184980059	BRCA_2	0.736847756066137	interacts with	TAF1 (interacts with) SLC35D1
107231	0.316277088930276	1	0.503470313843205	BRCA_2	0.628194116383938	interacts with	TAF1 (interacts with) UGGT1
107232	0.76564927378225	2	0.823943176089742	BRCA_2	0.929250093939557	interacts with	TBX21 (interacts with) FUT7
107233	0.578819593489447	2	0.609061805643635	BRCA_2	0.950346234365774	interacts with	TBX21 (interacts with) GM2A
107234	0.439429581986737	2	0.455291083583478	BRCA_2	0.965161844436094	interacts with	TBX21 (interacts with) LFNG
107235	0.437194919353306	2	0.441819689304152	BRCA_2	0.989532449406839	interacts with	TBX21 (interacts with) TPST2
107236	0.511824715206794	1	0.525709682116903	BRCA_2	0.973588146875671	interacts with	TCF12 (interacts with) FUT11
107237	0.28233874569078	1	0.445787943272406	BRCA_2	0.63334764870088	interacts with	TCF12 (interacts with) STT3B
107238	0.291307353770659	1	0.429649515917643	BRCA_2	0.678011595447713	interacts with	TCF12 (interacts with) COG5
107239	0.295094493394119	1	0.506311156207575	BRCA_2	0.582832295469186	interacts with	TCF12 (interacts with) UGGT1
107240	0.263070946943608	1	0.497814465630388	BRCA_2	0.528451792999785	interacts with	TCF12 (interacts with) SLC35A5
107241	0.29255200360277	1	0.524005646453116	BRCA_2	0.558299334335409	interacts with	TCF12 (interacts with) MAN2A1
107242	0.296189788650764	1	0.439635329321627	BRCA_2	0.673716985183595	interacts with	TCF12 (interacts with) ACER2
107243	0.387537456250003	1	0.407946842542877	BRCA_2	0.949970476139353	interacts with	TDRD3 (interacts with) COG6
107244	0.461627719476885	1	0.480134068029895	BRCA_2	0.961455872879536	interacts with	TEAD1 (interacts with) EXTL2
107245	0.377697780985587	1	0.475164061876107	BRCA_2	0.794878677260039	interacts with	TEAD1 (interacts with) UGGT1
107246	0.412591327547126	1	0.455397952808429	BRCA_2	0.906001717844106	interacts with	TEAD1 (interacts with) GALNT1
107247	0.514116756801645	1	0.558456291661382	BRCA_2	0.920603392742109	interacts with	TET2 (interacts with) MAN1A2
107248	0.334115680909749	1	0.474781211685621	BRCA_2	0.703725574404123	interacts with	TET2 (interacts with) STT3B
107249	0.345053406918426	1	0.446923575585902	BRCA_2	0.772063560231909	interacts with	TET2 (interacts with) ACER2
107250	0.400962647226418	1	0.435797432320072	BRCA_2	0.920066566459094	interacts with	TET2 (interacts with) UGCG
107251	0.263027056716463	1	0.403098972646176	BRCA_2	0.652512347004509	interacts with	TET2 (interacts with) HS2ST1
107252	0.495881809558447	16	0.607396524753731	BRCA_2	0.816405411208933	interacts with	THAP11 (interacts with) COG8
107253	0.38306321092526	16	0.482239744077566	BRCA_2	0.794341850977024	interacts with	THAP11 (interacts with) COG4
107254	0.382854971630525	3	0.520532983835736	BRCA_2	0.7355056903586	interacts with	USF1 (interacts with) DPM3
107255	0.619499809961625	3	0.646682121600737	BRCA_2	0.95796650203994	interacts with	USF1 (interacts with) B4GALT3
107256	0.368305748107881	3	0.404599839343847	BRCA_2	0.910296328108224	interacts with	USF1 (interacts with) GALT
107257	0.29564272783772	3	0.423405299774048	BRCA_2	0.698249946317372	interacts with	USF1 (interacts with) CHST12
107258	0.42794219653441	1	0.482023656853488	BRCA_2	0.887803306849903	interacts with	VEZF1 (interacts with) SLC35A5
107259	0.238247108007619	17	0.425673041239777	BRCA_2	0.559695082671248	interacts with	YAP1 (interacts with) STT3A
107260	0.385783553610287	1	0.407228117645401	BRCA_2	0.947340168554404	interacts with	ZBTB10 (interacts with) SLC35F5
107261	0.40127598899585	3	0.415830503060453	BRCA_2	0.964998926347434	interacts with	ZBTB17 (interacts with) B3GAT3
107262	0.287244269684247	3	0.407616839771323	BRCA_2	0.704691861713549	interacts with	ZBTB17 (interacts with) NAGK
107357	0.451017585682915	4	0.559400397736504	CESC	0.806251814456805	interacts with	ADNP (interacts with) FUT7
107358	0.449009458870326	10	0.449419579265812	CESC	0.999087444307263	interacts with	AHR (interacts with) UGCG
107359	0.571802487451836	1	0.592014035388221	CESC	0.965859681142305	interacts with	ARID2 (interacts with) RTF1
107360	0.438520574310986	1	0.443303656329464	CESC	0.989210370927049	interacts with	ARID2 (interacts with) COG6
107361	0.275746959041403	1	0.407409133329891	CESC	0.67683057762508	interacts with	ASH2L (interacts with) COG7
107362	0.273230827878554	10	0.409604366789128	CESC	0.667060339274211	interacts with	ATF1 (interacts with) STT3B
107363	0.322642357356523	10	0.52153608407127	CESC	0.618638608546274	interacts with	ATF1 (interacts with) SLC35E3
107364	0.494156913043663	10	0.529305673979493	CESC	0.933594588791067	interacts with	ATF1 (interacts with) GANAB
107365	0.216354466513467	10	0.412048972723941	CESC	0.525069787416792	interacts with	ATF1 (interacts with) CSGALNACT2
107366	0.39201969988847	10	0.450885587152532	CESC	0.869443847970797	interacts with	ATF1 (interacts with) CHSY1
107367	0.280984598377385	10	0.404715154919502	CESC	0.694277431823062	interacts with	ATF1 (interacts with) B4GALT1
107368	0.302896064511322	10	0.517456703018792	CESC	0.585355378999356	interacts with	BACH1 (interacts with) UGCG
107369	0.392147118961227	10	0.417710231702295	CESC	0.938801803736311	interacts with	BACH1 (interacts with) MAN1A2
107370	0.411100490354945	10	0.457930989316027	CESC	0.897734593085677	interacts with	BACH1 (interacts with) FUT11
107371	0.354262287398214	10	0.442602138809788	CESC	0.800407987975091	interacts with	BACH1 (interacts with) ACER2
107372	0.30581459779265	10	0.403307209039397	CESC	0.758267124758428	interacts with	BACH1 (interacts with) NEU3
107373	0.56865330231433	4	0.658146860236803	CESC	0.864021902512347	interacts with	BATF (interacts with) FUT7
107374	0.435005679473371	4	0.465973881381826	CESC	0.933540906162766	interacts with	BATF (interacts with) FUCA1
107375	0.543448440709151	4	0.554309672755301	CESC	0.980405840669959	interacts with	BATF (interacts with) ST3GAL5
107376	0.533847644143766	4	0.586454792422603	CESC	0.910296328108224	interacts with	BATF (interacts with) ST8SIA4
107377	0.384472512241377	4	0.479156617249774	CESC	0.802394245222246	interacts with	BATF (interacts with) MGAT4A
107378	0.293883019141451	1	0.472873186539428	CESC	0.621483787846253	interacts with	BCL6 (interacts with) COG5
107379	0.328409063739012	1	0.453021626135243	CESC	0.724930212583208	interacts with	BCL6 (interacts with) PIGN
107380	0.453532001996867	1	0.455267237872374	CESC	0.996188533390595	interacts with	BRCA1 (interacts with) PIGW
107381	0.390050133150305	1	0.473530623065946	CESC	0.823706248657934	interacts with	BRCA1 (interacts with) ALG10
107382	0.300705741365606	1	0.407385203647891	CESC	0.738136139145373	interacts with	BRCA1 (interacts with) UGGT1
107383	0.409359713288058	1	0.421091873605939	CESC	0.972138715911531	interacts with	BRCA1 (interacts with) PIGO
107384	0.333047966315612	1	0.405809623006752	CESC	0.820700021473051	interacts with	BRCA1 (interacts with) PIGN
107385	0.368474000133039	1	0.43915122677404	CESC	0.839059480352158	interacts with	BRCA1 (interacts with) SLC35A3
107386	0.395203213014709	1	0.486958953038629	CESC	0.811573974661799	interacts with	BRCA1 (interacts with) ALG10B
107387	0.29659989454405	1	0.423117080377283	CESC	0.700987760360747	interacts with	BRCA1 (interacts with) STT3B
107388	0.306599860059757	1	0.428489923714693	CESC	0.715535752630449	interacts with	BRCA1 (interacts with) MAN1A2
107389	0.500906495287244	2	0.516631758718276	CESC	0.96956194975306	interacts with	BRD1 (interacts with) ALG12
107390	0.410637109992095	2	0.428151129795855	CESC	0.959093837234271	interacts with	BRD1 (interacts with) MAN2A2
107391	0.309189171837366	2	0.440536629416128	CESC	0.701846682413571	interacts with	BRD1 (interacts with) NDST2
107392	0.436878287498545	2	0.454316347877122	CESC	0.961616920764441	interacts with	BRD1 (interacts with) RTF1
107393	0.378964307639448	2	0.408290753193038	CESC	0.928172643332618	interacts with	BRD1 (interacts with) ACER2
107394	0.41085928271402	10	0.430939567477295	CESC	0.953403478634314	interacts with	BRD2 (interacts with) STT3B
107395	0.325743167742411	10	0.428890566066273	CESC	0.759501825209362	interacts with	BRD2 (interacts with) NEU3
107396	0.373534252652112	10	0.417083022142513	CESC	0.895587287953618	interacts with	BRD2 (interacts with) ALG10B
107397	0.304453893489466	10	0.491282668738893	CESC	0.619712261112304	interacts with	BRD2 (interacts with) MAN1A2
107398	0.382990467237977	10	0.489727239408912	CESC	0.782048529095985	interacts with	BRD3 (interacts with) RTF1
107399	0.344078621013346	10	0.424076786571166	CESC	0.811359244148594	interacts with	BRD3 (interacts with) STT3B
107400	0.279913943072786	10	0.44550896544428	CESC	0.628301481640541	interacts with	BRD3 (interacts with) UGCG
107401	0.297180518665525	10	0.411865092009627	CESC	0.721548207000215	interacts with	BRD3 (interacts with) FUT10
107402	0.325561291896804	10	0.426780840637134	CESC	0.762830148164054	interacts with	BRD3 (interacts with) SLC35A3
107403	0.480293519732882	10	0.490752437364057	CESC	0.978687996564312	interacts with	BRD3 (interacts with) PIGO
107404	0.276808114668185	10	0.463953712438271	CESC	0.596628730942667	interacts with	BRD3 (interacts with) B4GALT5
107405	0.507467937258472	10	0.640584992562907	CESC	0.792194545844965	interacts with	BRD4 (interacts with) SLC35E1
107406	0.486484681429199	10	0.508857130982263	CESC	0.956033927421087	interacts with	BRD4 (interacts with) STT3B
107407	0.300089736158755	10	0.435296029058191	CESC	0.689392312647627	interacts with	BRD4 (interacts with) UGCG
107408	0.384480748135146	10	0.455546837314687	CESC	0.843998282155894	interacts with	BRD4 (interacts with) FUT11
107409	0.455210809563021	10	0.482539518610366	CESC	0.943364827141937	interacts with	BRD4 (interacts with) MAN1A2
107410	0.344035611462829	10	0.619437016270016	CESC	0.555400472407129	interacts with	BRD4 (interacts with) NEU3
107411	0.324903900399185	10	0.423504993117068	CESC	0.767178441056474	interacts with	BRD4 (interacts with) POFUT1
107412	0.434300071490665	10	0.437021485076065	CESC	0.993772815117028	interacts with	BRD4 (interacts with) PIGO
107413	0.305112596977749	10	0.402780629048367	CESC	0.757515567962207	interacts with	BRD4 (interacts with) SLC35D1
107414	0.521522990289273	1	0.535640742424681	CESC	0.973643244403886	interacts with	CASP8AP2 (interacts with) ALG10B
107415	0.461638147058931	1	0.470606164034192	CESC	0.980943689945783	interacts with	CASP8AP2 (interacts with) SLC35A5
107416	0.308451376034886	1	0.419434428263221	CESC	0.735398325101997	interacts with	CBFB (interacts with) COG6
107417	0.311446997291438	1	0.510302987557825	CESC	0.610317801159545	interacts with	CBX7 (interacts with) MAN1C1
107418	0.25320342002378	1	0.436325005384178	CESC	0.580309211939017	interacts with	CBX7 (interacts with) FAM20B
107419	0.302681512423437	1	0.453425911815343	CESC	0.667543482928924	interacts with	CBX7 (interacts with) COG7
107420	0.229455100771036	1	0.41757421035198	CESC	0.549495383293966	interacts with	CBX7 (interacts with) OGT
107421	0.301872439457531	1	0.415923062294	CESC	0.725789134636032	interacts with	CBX7 (interacts with) GAL3ST4
107422	0.484159388001986	10	0.484705784559813	CESC	0.998872725320736	interacts with	CDK12 (interacts with) PIGO
107423	0.403482917021173	10	0.403829756685512	CESC	0.999141124053894	interacts with	CDK12 (interacts with) GANAB
107424	0.508232667902648	10	0.542540047582283	CESC	0.93676525846798	interacts with	CDK12 (interacts with) ACER2
107425	0.522181212818609	10	0.528048735946035	CESC	0.98888829244726	interacts with	CDK12 (interacts with) SLC35E1
107426	0.421004921385184	10	0.423711544056434	CESC	0.99361211015084	interacts with	CDK12 (interacts with) COG8
107427	0.616921871739931	10	0.688099482016715	CESC	0.896559128240915	interacts with	CDK12 (interacts with) NEU3
107428	0.534035363470287	10	0.621945029742076	CESC	0.858653639682199	interacts with	CDK8 (interacts with) STT3B
107429	0.367857610971202	10	0.516153327596531	CESC	0.71269057333047	interacts with	CDK8 (interacts with) NEU3
107430	0.472542179780423	10	0.525178433563016	CESC	0.899774532961134	interacts with	CDK8 (interacts with) MAN1A2
107431	0.364754272941019	10	0.575280890385683	CESC	0.6340455228688	interacts with	CDK8 (interacts with) COG3
107432	0.47064397154167	10	0.484266234085187	CESC	0.971870302770024	interacts with	CDK8 (interacts with) FUT11
107433	0.342478273260866	10	0.452781069858298	CESC	0.756388232767876	interacts with	CDK8 (interacts with) SLC35A3
107434	0.372648469103266	10	0.414305919573598	CESC	0.899452437191325	interacts with	CDK8 (interacts with) SLC35D1
107435	0.293781757261355	10	0.458800014609701	CESC	0.640326390380073	interacts with	CDK8 (interacts with) UGCG
107436	0.339923357206513	10	0.510734981290767	CESC	0.665557225681769	interacts with	CDK8 (interacts with) SLC35E1
107437	0.311441336022994	10	0.510248830909089	CESC	0.610371483787846	interacts with	CDK8 (interacts with) ACER2
107438	0.379215060325144	9	0.428615869409428	CESC	0.884743397036719	interacts with	CEBPA (interacts with) NAGK
107439	0.372060565896568	9	0.440858992527274	CESC	0.843944599527593	interacts with	CEBPA (interacts with) HS3ST6
107440	0.365051198435339	10	0.623183075921324	CESC	0.585784840025768	interacts with	CHD1 (interacts with) MAN2A1
107441	0.31082639778469	10	0.461544371297984	CESC	0.673448572042087	interacts with	CHD1 (interacts with) STT3B
107442	0.275277177746216	10	0.453672765377025	CESC	0.606774747691647	interacts with	CHD1 (interacts with) CSGALNACT2
107443	0.280522820488582	10	0.428045470188508	CESC	0.655357526304488	interacts with	CHD1 (interacts with) NEU3
107444	0.282354620540427	10	0.4570871531613	CESC	0.617726003865149	interacts with	CHD1 (interacts with) MAN1A2
107445	0.225120295994527	10	0.437602094728795	CESC	0.514440627013099	interacts with	CHD1 (interacts with) SLC35A5
107446	0.488372691568926	1	0.504234923985476	CESC	0.968541979815332	interacts with	CHD2 (interacts with) MAN1A2
107447	0.333059113740116	1	0.505971715115876	CESC	0.658256388232768	interacts with	CHD2 (interacts with) MAN2A2
107448	0.396123479843003	1	0.412764344270038	CESC	0.959684346145587	interacts with	CHD2 (interacts with) SLC35E1
107449	0.350895777503341	1	0.558865128533879	CESC	0.627872020614129	interacts with	CHD2 (interacts with) RTF1
107450	0.357345007593969	1	0.453572008821236	CESC	0.787846252952545	interacts with	CHD2 (interacts with) CHSY1
107451	0.322040353703206	1	0.44741704271952	CESC	0.719776680266266	interacts with	CHD2 (interacts with) PIGN
107452	0.466204465354286	10	0.565136772344612	CESC	0.824940949108868	interacts with	CHD8 (interacts with) NEU3
107453	0.409206092805072	10	0.457709324893292	CESC	0.894030491732875	interacts with	CHD8 (interacts with) STT3B
107454	0.448495243880439	10	0.45042966373759	CESC	0.995705389735882	interacts with	CHD8 (interacts with) FUT11
107455	0.403063273958724	10	0.405545137047808	CESC	0.993880180373631	interacts with	CHD8 (interacts with) PIGO
107456	0.449160715496177	10	0.488239820754087	CESC	0.919959201202491	interacts with	CHD8 (interacts with) NDST2
107457	0.351162473056042	10	0.527834628264985	CESC	0.665288812540262	interacts with	CHD8 (interacts with) ACER2
107458	0.373048453509366	10	0.427639790275229	CESC	0.872342709899077	interacts with	CHD8 (interacts with) SLC35A3
107459	0.389503581842145	10	0.430195228421409	CESC	0.905411208932789	interacts with	CHD8 (interacts with) COG8
107460	0.381186365138235	10	0.46823208768843	CESC	0.814097058191969	interacts with	CHD8 (interacts with) SLC35E1
107461	0.529018471078831	10	0.574774588692847	CESC	0.920392935745343	interacts with	CLOCK (interacts with) FUT11
107462	0.387633402267403	3	0.52946436555486	CESC	0.732123684775607	interacts with	CPSF3L (interacts with) B3GALT6
107463	0.415330835944216	10	0.436710399210069	CESC	0.951044071071985	interacts with	CREB1 (interacts with) FUT11
107464	0.438635544060619	10	0.441813718760745	CESC	0.992806527807601	interacts with	CREBBP (interacts with) FUT11
107465	0.361211810257683	10	0.556593068200853	CESC	0.648969293536612	interacts with	CREBBP (interacts with) MAN1A2
107466	0.360861732579097	10	0.538028842202931	CESC	0.670710757998712	interacts with	CREBBP (interacts with) NEU3
107467	0.42323296177508	10	0.538155877948546	CESC	0.786450504616706	interacts with	CREBBP (interacts with) ACER2
107468	0.39544592750108	10	0.500262596773523	CESC	0.790476701739317	interacts with	CREBBP (interacts with) NDST2
107469	0.38519804449764	10	0.439269615727091	CESC	0.876905733304703	interacts with	CREBBP (interacts with) PIGN
107470	0.418809536677564	10	0.424414321033057	CESC	0.986794073437836	interacts with	CREBBP (interacts with) PIGO
107471	0.485771393917469	13	0.508795417591843	CESC	0.954747973589565	interacts with	DEK (interacts with) SLC35B3
107472	0.261915495546975	2	0.432493737350329	CESC	0.605593729869014	interacts with	DNMT3A (interacts with) SLC35E3
107473	0.271107684131252	2	0.432342602516647	CESC	0.627066781189607	interacts with	DNMT3A (interacts with) MAN2A2
107474	0.249987837968023	2	0.425509269523787	CESC	0.587502684131415	interacts with	DNMT3A (interacts with) GAL3ST2
107475	0.360491417989369	6	0.437303603432272	CESC	0.824350440197552	interacts with	E2F1 (interacts with) PMM1
107476	0.278734838910741	1	0.440246954318237	CESC	0.633132918187674	interacts with	E2F3 (interacts with) UGGT1
107477	0.237232461342019	1	0.429462224478049	CESC	0.552394245222246	interacts with	E2F3 (interacts with) SLC35F5
107478	0.362969272289462	10	0.404679890124976	CESC	0.896929353661155	interacts with	E2F7 (interacts with) RTF1
107479	0.332981242682674	10	0.438916967781832	CESC	0.758642903156539	interacts with	E2F7 (interacts with) ALG10B
107480	0.266255540848931	10	0.401734020325116	CESC	0.662765729010092	interacts with	E2F7 (interacts with) SLC35D1
107481	0.366240894935912	10	0.443671417758091	CESC	0.825477775391883	interacts with	E2F7 (interacts with) ACER2
107482	0.326144111210902	10	0.405027500242445	CESC	0.805239424522225	interacts with	E2F7 (interacts with) FUT11
107483	0.344194700646475	12	0.529757819023593	CESC	0.649720850332832	interacts with	EED (interacts with) ALG8
107484	0.327170437322512	12	0.459860477359372	CESC	0.711455872879536	interacts with	EED (interacts with) DPAGT1
107485	0.290859470231663	12	0.435156229337034	CESC	0.668402404981748	interacts with	EED (interacts with) STT3A
107486	0.505549947270064	1	0.56179588485037	CESC	0.899881898217737	interacts with	EHF (interacts with) SLC35A3
107487	0.483657338441137	1	0.613730851531437	CESC	0.78806098346575	interacts with	EHF (interacts with) MAN2A1
107488	0.399821545903535	1	0.429817391337203	CESC	0.930212583208074	interacts with	EHF (interacts with) COG5
107489	0.415850977247222	1	0.524012176429767	CESC	0.793590294180803	interacts with	EHF (interacts with) STT3B
107490	0.423546188474488	1	0.674920307861656	CESC	0.62754992484432	interacts with	EHF (interacts with) MAN1A2
107491	0.455368416590991	1	0.555289530260342	CESC	0.820055829933434	interacts with	EHF (interacts with) ACER2
107492	0.389817889235124	1	0.569710312307539	CESC	0.684238780330685	interacts with	EHF (interacts with) FUT2
107493	0.355403622388194	1	0.456488911111307	CESC	0.778559158256388	interacts with	EHF (interacts with) FUT11
107494	0.402486072980111	1	0.582919496771382	CESC	0.690465965213657	interacts with	EHF (interacts with) FUT6
107495	0.296846053132682	1	0.461766035720718	CESC	0.642849473910243	interacts with	EHF (interacts with) FUT3
107496	0.287351057373916	1	0.456526694819728	CESC	0.629428816834872	interacts with	EHF (interacts with) ASAH1
107497	0.586655478314094	1	0.722717958470666	CESC	0.811735022546704	interacts with	ELF1 (interacts with) COG3
107498	0.440363137531356	1	0.780205870832614	CESC	0.564419153961778	interacts with	ELF1 (interacts with) COG6
107499	0.333257796792163	1	0.466831571562973	CESC	0.713871591153103	interacts with	ELF1 (interacts with) SLC35A5
107500	0.320359419839998	1	0.467574651161912	CESC	0.68515138501181	interacts with	ELF1 (interacts with) SLC35A3
107501	0.343285840192658	1	0.56059688183649	CESC	0.612357741035001	interacts with	ELF1 (interacts with) MAN1A2
107502	0.345474628975267	1	0.545104301927095	CESC	0.633777109727292	interacts with	ELF1 (interacts with) PIGN
107503	0.30547871065969	1	0.461288701537671	CESC	0.662228902727078	interacts with	ELF1 (interacts with) RTF1
107504	0.305528132107291	1	0.474044481500467	CESC	0.644513635387589	interacts with	ELF1 (interacts with) PAPSS1
107505	0.493582741560566	10	0.525515968024907	CESC	0.939234526813033	interacts with	ELK3 (interacts with) FUT11
107506	0.381830428014198	10	0.484419887832764	CESC	0.788222031350655	interacts with	EP400 (interacts with) FKTN
107507	0.35866411944848	10	0.415032626232221	CESC	0.864182950397251	interacts with	EP400 (interacts with) STT3B
107508	0.399786685152101	10	0.488054680582826	CESC	0.819143225252308	interacts with	EP400 (interacts with) OGT
107509	0.400017563190685	10	0.429581872888048	CESC	0.931178870517501	interacts with	EP400 (interacts with) ACER2
107510	0.412002702961203	10	0.436340118867547	CESC	0.944223749194761	interacts with	EP400 (interacts with) FUT11
107511	0.429536016431103	10	0.494218462883174	CESC	0.869121752200988	interacts with	EP400 (interacts with) PIGO
107512	0.395720787378975	2	0.420098162074477	CESC	0.941972193891245	interacts with	ERCC3 (interacts with) SLC35E3
107513	0.42968040369106	1	0.634892247160869	CESC	0.676776894996779	interacts with	ERCC6 (interacts with) MAN1A2
107514	0.325504413636518	1	0.487576086942832	CESC	0.667597165557226	interacts with	ERCC6 (interacts with) STT3B
107515	0.535291511064022	1	0.610656517122947	CESC	0.876583637534894	interacts with	ERCC6 (interacts with) NDST2
107516	0.391780556410127	1	0.441318752180435	CESC	0.887749624221602	interacts with	ERCC6 (interacts with) COG5
107517	0.40699438978946	1	0.549343634011887	CESC	0.740873953188748	interacts with	ERCC6 (interacts with) ACER2
107518	0.33260028170171	1	0.463228265236595	CESC	0.718005153532317	interacts with	ERCC6 (interacts with) MAN2A1
107519	0.34559045641952	1	0.428605793753849	CESC	0.806313077088254	interacts with	ERCC6 (interacts with) COG6
107520	0.375780289865009	1	0.497302872947243	CESC	0.755636675971656	interacts with	ERCC6 (interacts with) SLC35F5
107521	0.296567739786034	1	0.400294461034291	CESC	0.740873953188748	interacts with	ERCC6 (interacts with) UGCG
107522	0.342650019565895	1	0.493878409507389	CESC	0.693794288168349	interacts with	ERCC6 (interacts with) SLC35A3
107523	0.279090387771814	1	0.402266770613847	CESC	0.693794288168349	interacts with	ERCC6 (interacts with) SLC35D1
107524	0.394574761306385	1	0.401756690550169	CESC	0.982123684775607	interacts with	ERCC6 (interacts with) COG8
107525	0.302654720228648	1	0.439393042507931	CESC	0.688801803736311	interacts with	ERCC6 (interacts with) HK1
107526	0.54693936815586	14	0.560324839135861	CESC	0.976111230405841	interacts with	FLI1 (interacts with) ST3GAL2
107527	0.378148720290014	11	0.418249279275762	CESC	0.904122825853554	interacts with	FOSL1 (interacts with) HAS3
107528	0.4693292167402	10	0.538308272239176	CESC	0.871859566244363	interacts with	FOSL2 (interacts with) UGCG
107529	0.314467967181189	10	0.58351521990748	CESC	0.538919905518574	interacts with	FOSL2 (interacts with) MGAT5
107530	0.342654136751518	10	0.465264323887111	CESC	0.736471977668027	interacts with	FOSL2 (interacts with) NEU3
107531	0.274523188780961	10	0.414678718830015	CESC	0.662014172213872	interacts with	FOSL2 (interacts with) SLC35A3
107532	0.405726728590266	1	0.495728551763051	CESC	0.818445351084389	interacts with	FOXA1 (interacts with) GALNT4
107533	0.422243752592611	1	0.466521745153924	CESC	0.90508911316298	interacts with	FOXA1 (interacts with) GALNT7
107534	0.383056972683359	1	0.49109327509605	CESC	0.780008589220528	interacts with	FOXA1 (interacts with) ST6GALNAC1
107535	0.482322257621791	1	0.517164509007006	CESC	0.932628301481641	interacts with	FOXA1 (interacts with) SLC35A3
107536	0.43077189351556	1	0.459010343919909	CESC	0.938479707966502	interacts with	FOXA1 (interacts with) COG5
107537	0.437619932122486	1	0.465056996724152	CESC	0.941002791496672	interacts with	FOXA1 (interacts with) GCNT2
107538	0.293071091708459	1	0.410229057435015	CESC	0.714408417436118	interacts with	FOXA1 (interacts with) COG7
107539	0.428252231708422	1	0.436882944811856	CESC	0.980244792785055	interacts with	FOXA1 (interacts with) GNE
107540	0.36123204331049	10	0.449440990033917	CESC	0.803736310929783	interacts with	FOXK1 (interacts with) NDST1
107541	0.483183465668755	10	0.488427479839243	CESC	0.989263474339704	interacts with	FOXK1 (interacts with) SLC35E1
107542	0.329617386923614	10	0.427673795612808	CESC	0.770721494524372	interacts with	FOXK1 (interacts with) EXTL3
107543	0.509546015394219	1	0.584435882935996	CESC	0.871859566244363	interacts with	FOXO1 (interacts with) COG6
107544	0.355080379733685	1	0.450298680215065	CESC	0.788544127120464	interacts with	FOXO1 (interacts with) SLC35A5
107545	0.313532413582638	1	0.439861560492347	CESC	0.712797938587073	interacts with	FOXO1 (interacts with) ALG11
107546	0.290364130100804	1	0.410449462400802	CESC	0.707429675756925	interacts with	FOXO1 (interacts with) FKTN
107547	0.301312219241756	1	0.407140869000104	CESC	0.740068713764226	interacts with	FOXO1 (interacts with) B3GNT2
107548	0.548462555847744	4	0.614431109594165	CESC	0.892634743397037	interacts with	FOXP3 (interacts with) FUT7
107549	0.689321587122016	4	0.691139594429674	CESC	0.997369551213227	interacts with	FOXP3 (interacts with) ST8SIA4
107550	0.421966884362605	4	0.504777749929785	CESC	0.835945887910672	interacts with	FOXP3 (interacts with) HK3
107551	0.482867152934727	4	0.617990334927386	CESC	0.781350654928065	interacts with	FOXP3 (interacts with) MFNG
107552	0.411833922275676	4	0.525959296870375	CESC	0.783014816405411	interacts with	FOXP3 (interacts with) ST3GAL5
107553	0.436903854177087	4	0.537097934112769	CESC	0.813452866652351	interacts with	FOXP3 (interacts with) MGAT4A
107554	0.406759488695972	4	0.485432491218436	CESC	0.837932145157827	interacts with	FOXP3 (interacts with) MAN2B1
107555	0.362872195392515	1	0.451180300078212	CESC	0.804273137212798	interacts with	GABPA (interacts with) SLC35A5
107556	0.381952385473674	1	0.478963920336829	CESC	0.79745544341851	interacts with	GABPA (interacts with) COG3
107557	0.461438259007676	1	0.560124585481232	CESC	0.823813613914537	interacts with	GABPA (interacts with) PIGN
107558	0.412929616352449	1	0.47755962584053	CESC	0.864666094051965	interacts with	GABPA (interacts with) SLC35A3
107559	0.442393559812091	1	0.467994050325381	CESC	0.94529740176079	interacts with	GABPA (interacts with) RTF1
107560	0.3531622362684	1	0.417457080855877	CESC	0.845984539403049	interacts with	GABPA (interacts with) NDST2
107561	0.338237195123054	1	0.405632039577175	CESC	0.833852265406914	interacts with	GABPA (interacts with) ASAH1
107562	0.518005135165713	15	0.542892695527542	CESC	0.954157496376617	interacts with	GAPDH (interacts with) GPI
107563	0.410404681498995	16	0.422960907715811	CESC	0.970313506549281	interacts with	GATA6 (interacts with) FUT4
107564	0.447044714956622	1	0.484975308346547	CESC	0.921788609157765	interacts with	GLYR1 (interacts with) COG7
107565	0.39261197837043	1	0.411753000341313	CESC	0.953513339417038	interacts with	GLYR1 (interacts with) ALG1
107566	0.422406378604672	1	0.459316391958115	CESC	0.919641419292501	interacts with	GLYR1 (interacts with) NDST2
107567	0.450905365541658	1	0.480874516525964	CESC	0.937677814160717	interacts with	GRHL1 (interacts with) B3GNT5
107568	0.439350022273779	1	0.470652763941244	CESC	0.933490793923453	interacts with	GRHL1 (interacts with) PIGN
107569	0.376889365435209	1	0.417004935811777	CESC	0.903800730083745	interacts with	GRHL2 (interacts with) FAM20B
107570	0.240786892314515	1	0.431576852692656	CESC	0.557923555937299	interacts with	GRHL2 (interacts with) RTF1
107571	0.422814787992635	1	0.598040536881307	CESC	0.707000214730513	interacts with	GRHL2 (interacts with) PIGN
107572	0.341785625622924	1	0.463106097912702	CESC	0.73802877388877	interacts with	GRHL2 (interacts with) NDST2
107573	0.377227358028959	1	0.437165063168063	CESC	0.862894567318016	interacts with	GRHL2 (interacts with) MAN1A2
107574	0.413304834854352	2	0.423792149301064	CESC	0.975253636802834	interacts with	GTF3C2 (interacts with) MAN2A2
107575	0.320233459495824	10	0.532331686907747	CESC	0.601567532746403	interacts with	HCFC1 (interacts with) NEU3
107576	0.449161573141195	10	0.452464946164513	CESC	0.992699162550999	interacts with	HCFC1 (interacts with) PIGO
107577	0.342573500051527	10	0.453808786727339	CESC	0.754885119175435	interacts with	HCFC1 (interacts with) MAN1A2
107578	0.346301768333184	10	0.540503505698413	CESC	0.640702168778183	interacts with	HCFC1 (interacts with) NDST2
107579	0.361274092526713	10	0.411584233110367	CESC	0.877764655357526	interacts with	HCFC1 (interacts with) COG8
107580	0.373498052865632	10	0.425536497173149	CESC	0.877710972729225	interacts with	HCFC1 (interacts with) SLC35E1
107581	0.284521553877653	10	0.473093591505215	CESC	0.601406484861499	interacts with	HCFC1 (interacts with) ACER2
107582	0.310838931301468	1	0.432306078265174	CESC	0.719025123470045	interacts with	HDAC1 (interacts with) CMAS
107583	0.284494163596319	1	0.413672412729079	CESC	0.687728151170281	interacts with	HDAC1 (interacts with) PIGN
107584	0.488179868967208	17	0.497718493739869	CESC	0.980835301696371	interacts with	HDAC3 (interacts with) GNPDA1
107585	0.4883300045376	10	0.491363273983524	CESC	0.993826829137366	interacts with	HECTD1 (interacts with) FUT11
107586	0.280054607200055	10	0.445770932489329	CESC	0.62824779901224	interacts with	HIF1A (interacts with) MAN2A1
107587	0.380959707037668	10	0.426012571899248	CESC	0.894245222246081	interacts with	HIF1A (interacts with) CHSY1
107588	0.347253094283901	10	0.401429231743857	CESC	0.865041872450075	interacts with	HIF1A (interacts with) GALNT2
107589	0.251401550775965	10	0.426512576307348	CESC	0.589435258750268	interacts with	HIF1A (interacts with) EXT2
107590	0.207065949620785	10	0.40296954759047	CESC	0.513850118101782	interacts with	HIF1A (interacts with) GALNT10
107591	0.589650500377326	12	0.596179059513119	CESC	0.989049331687154	interacts with	HINFP (interacts with) DPAGT1
107592	0.57566754116705	12	0.626518117917916	CESC	0.918836223093027	interacts with	HINFP (interacts with) STT3A
107593	0.420648378486207	10	0.455596432722067	CESC	0.923291642063449	interacts with	HOXA6 (interacts with) FUT11
107594	0.510901574694153	18	0.529314490178125	CESC	0.96521365686064	interacts with	HSF1 (interacts with) TSTA3
107595	0.656916291559195	4	0.757429851396675	CESC	0.867296542838737	interacts with	IKZF1 (interacts with) MFNG
107596	0.671195503424658	4	0.823109271744209	CESC	0.815439123899506	interacts with	IKZF1 (interacts with) ST8SIA4
107597	0.634476077096811	4	0.641362077499424	CESC	0.989263474339704	interacts with	IKZF1 (interacts with) MGAT4A
107598	0.430977567946451	4	0.499579971108058	CESC	0.86267983680481	interacts with	IKZF1 (interacts with) MAN2B1
107599	0.604932519569199	4	0.637044659083896	CESC	0.949592012024909	interacts with	IKZF1 (interacts with) ST3GAL5
107600	0.374080682869043	4	0.49841749234565	CESC	0.750536826283015	interacts with	IKZF1 (interacts with) MAN1C1
107601	0.359057038374126	4	0.413944455429708	CESC	0.86740390809534	interacts with	IKZF1 (interacts with) NDST2
107602	0.627108300430512	2	0.679881308777281	CESC	0.922379086370712	interacts with	INO80 (interacts with) RTF1
107603	0.381994633934974	2	0.400032493989242	CESC	0.954909012829459	interacts with	INTS3 (interacts with) B4GALT3
107604	0.39374349365185	2	0.414596854128437	CESC	0.949702077406195	interacts with	INTS3 (interacts with) GBA
107605	0.495030171797546	4	0.573649893638861	CESC	0.862948249946317	interacts with	IRF1 (interacts with) HK3
107606	0.519658798449497	4	0.525926550989744	CESC	0.988082456517071	interacts with	IRF1 (interacts with) ST8SIA4
107607	0.48561853034501	4	0.510156890551932	CESC	0.951900365041872	interacts with	IRF1 (interacts with) ST3GAL5
107608	0.391467873928123	4	0.415488549647163	CESC	0.942186912877771	interacts with	IRF2 (interacts with) LAMP3
107609	0.389700684108368	4	0.403027482610048	CESC	0.966933276074937	interacts with	IRF2 (interacts with) ST8SIA4
107610	0.654357352923215	4	0.725600855423159	CESC	0.90181447283659	interacts with	IRF4 (interacts with) MFNG
107611	0.589779752408186	4	0.689192473989065	CESC	0.855754777753919	interacts with	IRF4 (interacts with) FUT7
107612	0.68645776437049	4	0.715775831776854	CESC	0.959040154605969	interacts with	IRF4 (interacts with) ST8SIA4
107613	0.443758366060078	4	0.55601875583286	CESC	0.798099634958128	interacts with	IRF4 (interacts with) ST3GAL5
107614	0.699217906786857	4	0.708921867069357	CESC	0.986311664608943	interacts with	IRF8 (interacts with) HK3
107615	0.766262068638449	4	0.811384987021296	CESC	0.944387782489667	interacts with	IRF8 (interacts with) ST8SIA4
107616	0.488683703912053	4	0.508898693061526	CESC	0.960276987492619	interacts with	IRF8 (interacts with) LIPA
107617	0.683346625433545	4	0.693887729488799	CESC	0.984808631703258	interacts with	IRF8 (interacts with) MGAT4A
107618	0.39918154750403	4	0.410077922601333	CESC	0.97342852541736	interacts with	IRF8 (interacts with) FUCA1
107619	0.467681589258689	4	0.476923600082117	CESC	0.980621611465994	interacts with	IRF8 (interacts with) NAAA
107620	0.269556732675096	11	0.416601909588624	CESC	0.647036718917758	interacts with	JARID2 (interacts with) HAS3
107621	0.333499940844873	1	0.450666441643692	CESC	0.740015031135924	interacts with	KAT2B (interacts with) COG6
107622	0.266214626482657	1	0.426181339130194	CESC	0.62465106291604	interacts with	KAT2B (interacts with) PAPSS1
107623	0.247743620068235	1	0.455709307260895	CESC	0.543643976809105	interacts with	KAT2B (interacts with) MAN2A1
107624	0.430749196381346	2	0.489506834443125	CESC	0.879965643117887	interacts with	KDM2B (interacts with) MAN2A2
107625	0.351455273740965	2	0.438066834342368	CESC	0.802286879965643	interacts with	KDM2B (interacts with) RTF1
107626	0.279360718698179	2	0.421780796556141	CESC	0.662336267983681	interacts with	KDM2B (interacts with) MGAT3
107627	0.422852704759424	1	0.423853862691485	CESC	0.997637964354735	interacts with	KDM3A (interacts with) SLC35A3
107628	0.486549782196285	10	0.555664848430654	CESC	0.875617350225467	interacts with	KDM5A (interacts with) ALG10
107629	0.473183507023399	10	0.520703117251411	CESC	0.908739531887481	interacts with	KDM5A (interacts with) NEU3
107630	0.447570524464817	10	0.556119512388648	CESC	0.804809963495813	interacts with	KDM5A (interacts with) MAN2A1
107631	0.410555222843678	10	0.420741744574574	CESC	0.975789134636032	interacts with	KDM5A (interacts with) FUT11
107632	0.403168525291077	10	0.412831095488247	CESC	0.976594374060554	interacts with	KDM5A (interacts with) SLC35A5
107633	0.3900231058046	10	0.489710866468596	CESC	0.796435473480782	interacts with	KDM5A (interacts with) NDST2
107634	0.316817699051716	1	0.480358139177549	CESC	0.659544771312003	interacts with	KDM5B (interacts with) MAN1A2
107635	0.415245417122231	1	0.467580948446649	CESC	0.888071719991411	interacts with	KDM5B (interacts with) STT3B
107636	0.284522425450528	1	0.491704586816257	CESC	0.578645050461671	interacts with	KDM5B (interacts with) ACER2
107637	0.363461570129992	1	0.428028962471961	CESC	0.849151814472837	interacts with	KDM5B (interacts with) PIGN
107638	0.270845265783049	1	0.442027826441795	CESC	0.612733519433111	interacts with	KDM5B (interacts with) SLC35A3
107639	0.340131307557512	1	0.45996123391516	CESC	0.73947820485291	interacts with	KDM5B (interacts with) MAN2A1
107640	0.280616347310191	1	0.500461590971205	CESC	0.560715052608976	interacts with	KDM5B (interacts with) SLC35D1
107641	0.265478930947013	1	0.477487836794531	CESC	0.555990981318445	interacts with	KDM5B (interacts with) FPGT
107642	0.37623455951589	1	0.4535657115365	CESC	0.829503972514494	interacts with	KDM5C (interacts with) MAN1A2
107643	0.382060656176242	1	0.42032990215279	CESC	0.908954262400687	interacts with	KDM5C (interacts with) COG7
107644	0.287867502941788	10	0.454671514736276	CESC	0.633132918187674	interacts with	KDM6B (interacts with) ACER2
107645	0.286536086568819	1	0.40226047332911	CESC	0.71231479493236	interacts with	KLF11 (interacts with) FAM20B
107646	0.3332392945123	11	0.418865153723018	CESC	0.795576551427958	interacts with	KLF4 (interacts with) B3GNT5
107647	0.352330027170321	11	0.436064297796076	CESC	0.8079772385656	interacts with	KLF4 (interacts with) HAS3
107648	0.414690395513106	1	0.444979993526391	CESC	0.931930427313721	interacts with	KLF5 (interacts with) SLC35A3
107649	0.345453063198515	1	0.522541588409415	CESC	0.661101567532746	interacts with	KLF5 (interacts with) ABO
107650	0.451387933942311	1	0.499522036088479	CESC	0.90363968219884	interacts with	KLF5 (interacts with) FUT2
107651	0.465087474987334	5	0.466038113686141	CESC	0.997960169627999	interacts with	LDB1 (interacts with) HK1
107652	0.538762576242509	8	0.538762576242509	CESC	1.0	interacts with	LEF1 (interacts with) ST6GAL2
107653	0.338184162641736	2	0.447485053394677	CESC	0.755744041228259	interacts with	LIN9 (interacts with) RTF1
107654	0.494140922848988	4	0.550793268958291	CESC	0.897144084174361	interacts with	LYL1 (interacts with) MFNG
107655	0.530248076094932	4	0.542121907875762	CESC	0.978097487652996	interacts with	LYL1 (interacts with) FUT7
107656	0.468920745806506	4	0.586127333616291	CESC	0.800032209576981	interacts with	LYL1 (interacts with) MAN2B1
107657	0.398348352864964	4	0.483006777137834	CESC	0.824726218595662	interacts with	LYL1 (interacts with) MGAT1
107658	0.523375151922264	4	0.546983411692546	CESC	0.956839166845609	interacts with	LYL1 (interacts with) RENBP
107659	0.449446247191658	4	0.491908618841728	CESC	0.913678333691218	interacts with	LYL1 (interacts with) HK3
107660	0.485884298478184	4	0.489404818430389	CESC	0.992806527807601	interacts with	LYL1 (interacts with) CHST12
107661	0.344101213688628	3	0.40069496834355	CESC	0.858761004938802	interacts with	MAZ (interacts with) B3GALT6
107662	0.388356345902871	3	0.403677362394882	CESC	0.962046381790852	interacts with	MAZ (interacts with) KHK
107663	0.307951078330446	1	0.43435395526157	CESC	0.708986471977668	interacts with	MBD2 (interacts with) PIGN
107664	0.406942120094982	6	0.408433071828089	CESC	0.996349581275499	interacts with	MBD3 (interacts with) DPM2
107665	0.282064050949546	6	0.433557978470843	CESC	0.650579772385656	interacts with	MBD3 (interacts with) PMM1
107666	0.432556443792624	1	0.435855365178104	CESC	0.992431155724945	interacts with	MECOM (interacts with) ST6GALNAC1
107667	0.494732340720998	1	0.509839507401199	CESC	0.970368779859359	interacts with	MECOM (interacts with) GALNT7
107668	0.506515305631479	10	0.521463035568324	CESC	0.971335015298728	interacts with	MED1 (interacts with) FUT11
107669	0.466349489181937	10	0.466625020623607	CESC	0.999409522787052	interacts with	MED1 (interacts with) GANAB
107670	0.469371774126947	10	0.476456341554648	CESC	0.985130710183048	interacts with	MED1 (interacts with) PIGO
107671	0.279833909761883	1	0.517702460129542	CESC	0.540530384367619	interacts with	MED12 (interacts with) NEU3
107672	0.221439840222473	1	0.438641146710361	CESC	0.504831436547133	interacts with	MED12 (interacts with) MAN2A2
107673	0.343074268057799	1	0.517808091507104	CESC	0.662550998496886	interacts with	MED12 (interacts with) NDST2
107674	0.32895179232354	1	0.429954672144465	CESC	0.765084818552716	interacts with	MED12 (interacts with) FAM20B
107675	0.305175215881745	1	0.474683026172775	CESC	0.642903156538544	interacts with	MED12 (interacts with) COG7
107676	0.40526713809212	1	0.42932872204163	CESC	0.943955336053253	interacts with	MED12 (interacts with) SLC35A3
107677	0.283425633033723	1	0.413928082489392	CESC	0.684721923985398	interacts with	MED12 (interacts with) COG5
107678	0.289027489200857	1	0.405391466669194	CESC	0.712958986471978	interacts with	MED12 (interacts with) ABO
107679	0.28529728963748	1	0.40316476341731	CESC	0.707644406270131	interacts with	MED12 (interacts with) C1GALT1C1
107680	0.267058011672286	1	0.400318390716291	CESC	0.667114021902512	interacts with	MED12 (interacts with) SLC35A5
107681	0.36910899874576	1	0.443855298472405	CESC	0.831597595018252	interacts with	MEF2A (interacts with) CHSY1
107682	0.488917072700518	1	0.531114254155893	CESC	0.920549710113807	interacts with	MEF2A (interacts with) RTF1
107683	0.280241259625639	1	0.41300112217614	CESC	0.678548421730728	interacts with	MEF2A (interacts with) COG3
107684	0.314510917245832	1	0.463029271038913	CESC	0.679246295898647	interacts with	MEF2A (interacts with) ACER2
107685	0.377848400657933	1	0.433595762179263	CESC	0.871430105217952	interacts with	MEF2A (interacts with) PIGN
107686	0.452865967424693	2	0.474330378227516	CESC	0.954747973589565	interacts with	MEF2D (interacts with) B4GALT3
107687	0.417762254055236	2	0.427539033719441	CESC	0.97713242793494	interacts with	MEF2D (interacts with) MAN2A2
107688	0.365009966229946	1	0.408103094107883	CESC	0.894406270130986	interacts with	MEIS1 (interacts with) PIGN
107689	0.581565959120119	10	0.622214119713341	CESC	0.934671748349348	interacts with	MRE11A (interacts with) NEU3
107690	0.496386100382522	10	0.50522737605999	CESC	0.9825004025981	interacts with	MRE11A (interacts with) DPAGT1
107691	0.39457872109484	19	0.409732831397758	CESC	0.96301465457083	interacts with	MZF1 (interacts with) FKRP
107692	0.395560886955839	10	0.492514417633405	CESC	0.803145802018467	interacts with	NCOR2 (interacts with) MGAT5
107693	0.283715292175428	10	0.406479654102744	CESC	0.697981533175864	interacts with	NCOR2 (interacts with) POFUT2
107694	0.356223167746161	10	0.485244984919597	CESC	0.734109942022761	interacts with	NCOR2 (interacts with) NEU3
107695	0.341361119262821	10	0.409246681016079	CESC	0.834120678548422	interacts with	NCOR2 (interacts with) GALNT2
107696	0.378538720180108	10	0.408754233349664	CESC	0.92607902082886	interacts with	NCOR2 (interacts with) PAPSS2
107697	0.209054971953337	10	0.407606868070625	CESC	0.512883830792356	interacts with	NCOR2 (interacts with) MAN2A1
107698	0.396919609434498	10	0.410084219886069	CESC	0.967897788275714	interacts with	NCOR2 (interacts with) PIGO
107699	0.452748129268557	10	0.469325296318733	CESC	0.96467872671641	interacts with	NFAT5 (interacts with) ACER2
107700	0.351171933384281	10	0.446954822019841	CESC	0.785698947820485	interacts with	NFYA (interacts with) STT3B
107701	0.329821819103226	10	0.504385587903693	CESC	0.653908095340348	interacts with	NFYA (interacts with) NEU3
107702	0.408620150067495	10	0.439758285022664	CESC	0.929192613270346	interacts with	NFYA (interacts with) PIGM
107703	0.382862416273195	10	0.462303823837238	CESC	0.828161906806957	interacts with	NFYA (interacts with) FAM20B
107704	0.407557124727248	10	0.409911674284282	CESC	0.994255958771741	interacts with	NFYA (interacts with) GANAB
107705	0.372366905427368	2	0.429661218675731	CESC	0.86665235129912	interacts with	NFYB (interacts with) B4GALT6
107706	0.36161027044232	2	0.517960485797734	CESC	0.698142581060769	interacts with	NFYB (interacts with) PIGY
107707	0.342473754070019	1	0.456272428180255	CESC	0.750590508911316	interacts with	NIPBL (interacts with) NEU3
107708	0.283335421083127	1	0.454019116037547	CESC	0.624060554004724	interacts with	NIPBL (interacts with) MGAT5
107709	0.340139812948564	1	0.443488796500725	CESC	0.766963710543268	interacts with	NIPBL (interacts with) COG5
107710	0.243915569369489	1	0.406046400912854	CESC	0.60070861069358	interacts with	NIPBL (interacts with) UGCG
107711	0.254092124433672	1	0.42819143241817	CESC	0.593407773244578	interacts with	NIPBL (interacts with) ACER2
107712	0.261680249705208	1	0.47515154415719	CESC	0.5507300837449	interacts with	NIPBL (interacts with) SLC35A3
107713	0.286827417053435	1	0.429365246293103	CESC	0.668026626583638	interacts with	NIPBL (interacts with) PIGN
107714	0.365281445258008	1	0.471190552057764	CESC	0.775230835301696	interacts with	NIPBL (interacts with) GALNT4
107715	0.284425000762807	1	0.409765577278389	CESC	0.694116383938158	interacts with	NIPBL (interacts with) PIGK
107716	0.335031111024651	1	0.459400775573588	CESC	0.729278505475628	interacts with	NIPBL (interacts with) B3GNT2
107717	0.220151210228015	1	0.410467094798065	CESC	0.536343139360103	interacts with	NIPBL (interacts with) COG3
107718	0.347779474132837	1	0.421910520621718	CESC	0.824296757569251	interacts with	NIPBL (interacts with) GALNT7
107719	0.454967331554438	1	0.457842827329712	CESC	0.993719469644103	interacts with	NPAT (interacts with) DPAGT1
107720	0.435191082064885	1	0.463903334160377	CESC	0.93810725213377	interacts with	NPAT (interacts with) RTF1
107721	0.474029897112062	1	0.515059956447979	CESC	0.920339255998712	interacts with	NPAT (interacts with) SLC35A3
107722	0.636993375630481	1	0.730299889293734	CESC	0.872235344642474	interacts with	NR2C2 (interacts with) STT3B
107723	0.392118303035208	1	0.471554535115549	CESC	0.831543912389951	interacts with	NR2C2 (interacts with) FKTN
107724	0.41442916813195	1	0.428673804429006	CESC	0.966770453081383	interacts with	NR2C2 (interacts with) OGT
107725	0.389569812185526	1	0.426977315920921	CESC	0.912389950611982	interacts with	NR2C2 (interacts with) ALG10B
107726	0.508781566540304	1	0.541699989798399	CESC	0.939231264762723	interacts with	NR2C2 (interacts with) FUT11
107727	0.37057126436589	1	0.403731519043619	CESC	0.917865578698733	interacts with	NR2C2 (interacts with) COG3
107728	0.404738631878519	1	0.440183981470869	CESC	0.919476057547778	interacts with	NR2C2 (interacts with) COG5
107729	0.429557663026233	1	0.510058652910038	CESC	0.842173072793644	interacts with	NR2C2 (interacts with) SLC35A3
107730	0.389672885633663	1	0.462699293318707	CESC	0.842173072793644	interacts with	NR2C2 (interacts with) SLC35D1
107731	0.424746412745123	1	0.463866809908903	CESC	0.915664590938372	interacts with	NR2C2 (interacts with) SLC35E1
107732	0.399388483917438	1	0.402848639723524	CESC	0.991410779471763	interacts with	NR2C2 (interacts with) PIGO
107733	0.32659415842216	7	0.402154678945532	CESC	0.812110800944814	interacts with	NRF1 (interacts with) POMT1
107734	0.4436451752404	1	0.472160333907226	CESC	0.939607043160833	interacts with	PBX1 (interacts with) MAN1A2
107735	0.301461037791589	1	0.515809333331654	CESC	0.584442774318231	interacts with	PBX1 (interacts with) FAM20B
107736	0.46640588160542	1	0.516080116575335	CESC	0.903747047455443	interacts with	PBX1 (interacts with) PIGN
107737	0.244971119101202	1	0.459179111150854	CESC	0.533497960060125	interacts with	PBX1 (interacts with) COG7
107738	0.550002870718777	10	0.573909341770016	CESC	0.958344516613882	interacts with	PHF20 (interacts with) POFUT1
107739	0.462289889020058	1	0.484909816585285	CESC	0.953352300177143	interacts with	PHF6 (interacts with) FAM20B
107740	0.391380942917749	1	0.440149976133291	CESC	0.889199055185742	interacts with	PHF8 (interacts with) COG5
107741	0.338006489154362	1	0.552120736580801	CESC	0.612196693150097	interacts with	PHF8 (interacts with) OGT
107742	0.34588834766878	1	0.444942209817971	CESC	0.777378140433756	interacts with	PHF8 (interacts with) NDST2
107743	0.334369966104633	1	0.44874954816982	CESC	0.745114880824565	interacts with	PHF8 (interacts with) PIGN
107744	0.455547175707537	1	0.601540567738003	CESC	0.757300837449001	interacts with	PHF8 (interacts with) MAN1A2
107745	0.489362765360341	1	0.499061074845748	CESC	0.980566888554864	interacts with	PHF8 (interacts with) SLC35A2
107746	0.395432810501725	1	0.438746941093939	CESC	0.901277646553575	interacts with	PHF8 (interacts with) SLC35A5
107747	0.331884958767893	1	0.528361081268978	CESC	0.628140433755637	interacts with	PHF8 (interacts with) SLC35A3
107748	0.33649482446586	1	0.508330677978269	CESC	0.66196048958557	interacts with	PHF8 (interacts with) COG7
107749	0.334558151405884	1	0.474468918491725	CESC	0.705121322739961	interacts with	PHF8 (interacts with) FAM20B
107750	0.390969431113555	10	0.488560982275662	CESC	0.800246940090187	interacts with	PIAS1 (interacts with) MGAT5
107751	0.382382466492581	10	0.486678094139369	CESC	0.785698947820485	interacts with	PIAS1 (interacts with) ACER2
107752	0.418044540445323	10	0.477574739323898	CESC	0.87534893708396	interacts with	PIAS1 (interacts with) UGCG
107753	0.364751496767425	10	0.428761966415321	CESC	0.85070861069358	interacts with	PIAS1 (interacts with) FUT11
107754	0.373797635200202	10	0.405846147258225	CESC	0.921032853768521	interacts with	PIAS1 (interacts with) ALG10
107755	0.411488803757274	10	0.440681466965074	CESC	0.933755636675972	interacts with	PIAS1 (interacts with) CHSY1
107756	0.381336306165212	10	0.408930557322294	CESC	0.932520936225038	interacts with	PIAS1 (interacts with) PIGO
107757	0.330249176044104	4	0.475636435081921	CESC	0.694331114451364	interacts with	PML (interacts with) LAMP3
107758	0.376891032180574	1	0.49532426608295	CESC	0.760897573545201	interacts with	POLR2B (interacts with) MAN1A2
107759	0.347945676339214	1	0.543570283365219	CESC	0.640111659866867	interacts with	POLR2B (interacts with) STT3B
107760	0.426772448494438	1	0.454696703875223	CESC	0.938587073223105	interacts with	POLR2B (interacts with) MAN2A1
107761	0.375513707695887	1	0.413615737166449	CESC	0.907880609834657	interacts with	POLR2B (interacts with) RTF1
107762	0.318430622713044	1	0.463162773475333	CESC	0.687513420657075	interacts with	POLR2B (interacts with) PIGN
107763	0.340022768101381	1	0.446650033438582	CESC	0.761273351943311	interacts with	POLR2B (interacts with) ACER2
107764	0.32617413318121	1	0.423826154638643	CESC	0.769594159330041	interacts with	POLR2B (interacts with) PAPSS1
107765	0.52025118633698	10	0.686980867589513	CESC	0.757300837449001	interacts with	POLR3A (interacts with) MGAT5
107766	0.657806019998124	10	0.701770261756203	CESC	0.937352372772171	interacts with	POLR3A (interacts with) NEU3
107767	0.386373851949314	10	0.534842246720059	CESC	0.722407129053038	interacts with	POLR3A (interacts with) MAN2A1
107768	0.4370343736856	10	0.478746034284937	CESC	0.912873094266695	interacts with	POLR3A (interacts with) UGCG
107769	0.39915739547355	1	0.702390323340382	CESC	0.568284303199485	interacts with	RB1 (interacts with) COG6
107770	0.380644318004565	1	0.720374109091642	CESC	0.528398110371484	interacts with	RB1 (interacts with) COG3
107771	0.211552421532059	1	0.407739111050097	CESC	0.51884260253382	interacts with	RB1 (interacts with) B3GNT5
107772	0.694427387994893	1	0.716545359971687	CESC	0.969132488726648	interacts with	RBBP5 (interacts with) MAN1A2
107773	0.468125468315929	1	0.636049688095487	CESC	0.735988834013313	interacts with	RBBP5 (interacts with) FAM20B
107774	0.456065889285035	1	0.462899546973336	CESC	0.985237277217093	interacts with	RBBP5 (interacts with) COG5
107775	0.497808607654575	1	0.498692053960173	CESC	0.998228473266051	interacts with	RBBP5 (interacts with) FUT11
107776	0.581839796269833	1	0.619803952931575	CESC	0.938748121108009	interacts with	RBBP5 (interacts with) ACER2
107777	0.556472567825158	1	0.590082028430981	CESC	0.943042731372128	interacts with	RBBP5 (interacts with) SLC35A3
107778	0.416168466276716	1	0.436901836666066	CESC	0.95254455658149	interacts with	RBBP5 (interacts with) SLC35E1
107779	0.513107580675125	1	0.550363794139243	CESC	0.932306205711832	interacts with	RBBP5 (interacts with) PIGN
107780	0.48247350989571	1	0.526262825994688	CESC	0.916791926132703	interacts with	RBBP5 (interacts with) B3GALNT2
107781	0.41653260429882	1	0.492896033088453	CESC	0.845071934721924	interacts with	RBBP5 (interacts with) HS2ST1
107782	0.438447166541411	1	0.442245712493687	CESC	0.991410779471763	interacts with	RBBP5 (interacts with) PIGO
107783	0.465679437142097	1	0.573646115268019	CESC	0.811788705175005	interacts with	RBBP5 (interacts with) PIGM
107784	0.400068295073896	1	0.424400467006636	CESC	0.942666952974018	interacts with	RBL2 (interacts with) ALG10B
107785	0.459914796003966	1	0.486115116883902	CESC	0.946102641185312	interacts with	RBL2 (interacts with) SLC35A5
107786	0.481767813613091	1	0.509039752239629	CESC	0.946424736955121	interacts with	RBL2 (interacts with) SLC35A3
107787	0.343172765258165	1	0.448007728027829	CESC	0.765997423233842	interacts with	RBL2 (interacts with) STT3B
107788	0.355865431810409	1	0.512926436379162	CESC	0.693794288168349	interacts with	RBL2 (interacts with) MAN2A1
107789	0.502375985273583	1	0.535400186147737	CESC	0.938318660081598	interacts with	RBL2 (interacts with) FPGT
107790	0.543467420660441	1	0.580454739525411	CESC	0.936278720206141	interacts with	RBL2 (interacts with) PIGN
107791	0.342914245898756	1	0.480502976726495	CESC	0.713656860639897	interacts with	RBL2 (interacts with) COG6
107792	0.369233464842265	1	0.608787483013074	CESC	0.60650633455014	interacts with	RBL2 (interacts with) MAN1A2
107793	0.343838409011405	1	0.556088025964964	CESC	0.618316512776465	interacts with	RBL2 (interacts with) ACER2
107794	0.365603531832726	1	0.418487316638812	CESC	0.873631092978312	interacts with	RBL2 (interacts with) PIGM
107795	0.459438021910106	1	0.567007517698519	CESC	0.810285591582564	interacts with	RBL2 (interacts with) ASAH1
107796	0.374504899786629	1	0.432047889590966	CESC	0.866813399184024	interacts with	RCOR1 (interacts with) MAN2A1
107797	0.350185753713671	1	0.410681202479115	CESC	0.852694867940734	interacts with	RCOR1 (interacts with) MAN1A2
107798	0.261367468629633	1	0.447002681383841	CESC	0.584711187459738	interacts with	RCOR1 (interacts with) GNPNAT1
107799	0.378424915520533	1	0.436867831328488	CESC	0.866222890272708	interacts with	RCOR1 (interacts with) ACER2
107800	0.257306339358414	1	0.410614451260905	CESC	0.626637320163195	interacts with	RCOR1 (interacts with) FUT11
107801	0.266551646830814	1	0.502970429210333	CESC	0.529954906592227	interacts with	RCOR1 (interacts with) PIGN
107802	0.217944940767136	1	0.411877686579101	CESC	0.529149667167705	interacts with	RCOR1 (interacts with) COG6
107803	0.429222419791549	10	0.44328553377851	CESC	0.968275269740727	interacts with	RFX7 (interacts with) NEU3
107804	0.425505134335664	2	0.426811067603871	CESC	0.996940254441999	interacts with	RLF (interacts with) RTF1
107805	0.525019025243871	1	0.59842467125025	CESC	0.877335194331114	interacts with	RNF2 (interacts with) FAM20B
107806	0.416753083839495	1	0.498700870158805	CESC	0.835677474769165	interacts with	RNF2 (interacts with) MAN1A2
107807	0.458842945337609	1	0.494665570099484	CESC	0.927582134421301	interacts with	RNF2 (interacts with) FPGT
107808	0.417169000159624	1	0.463084687144597	CESC	0.900848185527163	interacts with	RNF2 (interacts with) SLC35A3
107809	0.306209287910503	1	0.433802313118629	CESC	0.705872879536182	interacts with	RNF2 (interacts with) COG6
107810	0.524017293294768	1	0.535487088677104	CESC	0.978580631307709	interacts with	RNF2 (interacts with) B3GALNT2
107811	0.322158239189326	8	0.418666365258739	CESC	0.769486794073438	interacts with	RUNX1 (interacts with) ST6GAL2
107812	0.481875014169398	10	0.48275614520531	CESC	0.99817479063775	interacts with	RXRA (interacts with) NDST1
107813	0.466794287769985	10	0.514706049045772	CESC	0.906914322525231	interacts with	RYBP (interacts with) STT3B
107814	0.53693352562514	1	0.601515378599056	CESC	0.892634743397037	interacts with	SETDB1 (interacts with) PIGM
107815	0.378191347174272	1	0.540298214215994	CESC	0.699967790423019	interacts with	SETDB1 (interacts with) COG2
107816	0.544671853442842	2	0.585872923312926	CESC	0.929675756925059	interacts with	SIN3A (interacts with) RTF1
107817	0.428786261331722	2	0.473104926617741	CESC	0.906323813613915	interacts with	SIN3A (interacts with) PIGN
107818	0.446296653807523	2	0.477081032200536	CESC	0.935473480781619	interacts with	SIN3A (interacts with) SLC35E3
107819	0.283891022929502	2	0.415161090840851	CESC	0.683809319304273	interacts with	SIN3A (interacts with) ACER2
107820	0.264711724918183	2	0.460157709198947	CESC	0.575263044878677	interacts with	SIN3A (interacts with) MAN2A2
107821	0.464979149127713	2	0.489164262153445	CESC	0.950558299334335	interacts with	SIN3A (interacts with) CHSY1
107822	0.457541751401442	2	0.460160228112842	CESC	0.994309641400043	interacts with	SIN3A (interacts with) PIGO
107823	0.303562035704438	2	0.409142146089449	CESC	0.741947605754778	interacts with	SIN3A (interacts with) FKTN
107824	0.400429836159058	2	0.465240877438466	CESC	0.860693579557655	interacts with	SIN3A (interacts with) MPI
107825	0.431049482951667	6	0.505864661275351	CESC	0.852104359029418	interacts with	SIRT6 (interacts with) DPM2
107826	0.520254392042998	1	0.641340666731319	CESC	0.811198196263689	interacts with	SMAD1 (interacts with) PAPSS1
107827	0.278579934495641	1	0.424246813259059	CESC	0.656645909383723	interacts with	SMAD1 (interacts with) MAN1A2
107828	0.452650295997358	1	0.48748162767178	CESC	0.928548421730728	interacts with	SMAD1 (interacts with) PIGN
107829	0.397352023775218	1	0.456370522158256	CESC	0.870678548421731	interacts with	SMAD1 (interacts with) RTF1
107830	0.260063407380298	1	0.413491050928661	CESC	0.628945673180159	interacts with	SMAD1 (interacts with) ALG6
107831	0.371191122721304	5	0.431404307090869	CESC	0.860425166416148	interacts with	SMAD3 (interacts with) HK1
107832	0.3411663057888	2	0.483325419745514	CESC	0.705872879536182	interacts with	SMAD4 (interacts with) RTF1
107833	0.257277193490915	2	0.413758055801499	CESC	0.621805883616062	interacts with	SMAD4 (interacts with) B4GALT6
107834	0.47974631895385	10	0.519727503894871	CESC	0.923072793643977	interacts with	SMARCA4 (interacts with) SLC35E1
107835	0.387278377796929	1	0.488173069535877	CESC	0.793321881039296	interacts with	SMARCC1 (interacts with) SLC35A3
107836	0.403949401038853	1	0.468482719620954	CESC	0.862250375778398	interacts with	SMARCC1 (interacts with) B4GALT5
107837	0.48113152745985	1	0.487411251551125	CESC	0.987116169207644	interacts with	SMC1A (interacts with) NEU3
107838	0.349757345254671	1	0.403273076714782	CESC	0.867296542838737	interacts with	SMC1A (interacts with) STT3B
107839	0.477090966211155	1	0.579691508615315	CESC	0.823008374490015	interacts with	SMC1A (interacts with) MAN1A2
107840	0.30795716669732	1	0.43465874384283	CESC	0.708503328322955	interacts with	SMC1A (interacts with) MAN2A1
107841	0.420963975577146	1	0.423327409687491	CESC	0.994417006656646	interacts with	SMC1A (interacts with) FUT11
107842	0.364898744917508	1	0.506205974108084	CESC	0.720850332832295	interacts with	SMC1A (interacts with) SLC35A3
107843	0.390593106283672	1	0.406138341270011	CESC	0.961724286021044	interacts with	SMC1A (interacts with) SLC35D1
107844	0.298245434408189	1	0.455162702945744	CESC	0.655250161047885	interacts with	SMC1A (interacts with) PIGN
107845	0.296254854724804	1	0.473621303966156	CESC	0.625509984968864	interacts with	SMC1A (interacts with) FKTN
107846	0.30596059938739	1	0.408035083432725	CESC	0.749838952115096	interacts with	SMC1A (interacts with) GALNT7
107847	0.339520212934626	1	0.433012633612639	CESC	0.784088468971441	interacts with	SMC1A (interacts with) SLC35A5
107848	0.334306028854543	1	0.431802295486232	CESC	0.774210865363968	interacts with	SMC1A (interacts with) COG7
107849	0.407203976798946	1	0.492814168386875	CESC	0.826283014816405	interacts with	SMC3 (interacts with) STT3B
107850	0.483200863591212	1	0.486965250323366	CESC	0.992269701524587	interacts with	SMC3 (interacts with) FUT11
107851	0.461455101032826	1	0.518236306869204	CESC	0.890433755636676	interacts with	SMC3 (interacts with) RTF1
107852	0.403682944355671	1	0.407710143540308	CESC	0.990122396392527	interacts with	SMC3 (interacts with) SLC35A3
107853	0.363034446999387	1	0.438560679552826	CESC	0.827786128408847	interacts with	SMC3 (interacts with) NEU3
107854	0.477277397616514	1	0.51081432707845	CESC	0.934346145587288	interacts with	SMC3 (interacts with) PIGN
107855	0.341829218194512	1	0.449213028326446	CESC	0.760951256173502	interacts with	SMC3 (interacts with) FAM20B
107856	0.373364295941562	1	0.428846350030794	CESC	0.870624865793429	interacts with	SMC3 (interacts with) COG5
107857	0.339027467374324	1	0.494588743225696	CESC	0.685473480781619	interacts with	SMC3 (interacts with) MAN1A2
107858	0.350449485675199	1	0.405980909151592	CESC	0.863216663087825	interacts with	SMC3 (interacts with) COG6
107859	0.357776736968062	1	0.436369086377336	CESC	0.819894782048529	interacts with	SMC3 (interacts with) SLC35E3
107860	0.389986284605794	1	0.455636258757949	CESC	0.855915825638823	interacts with	SMC3 (interacts with) ACER2
107861	0.39515235435437	1	0.445170732199166	CESC	0.887642258964999	interacts with	SOX2 (interacts with) FUT2
107862	0.502310519474928	1	0.508175764773745	CESC	0.988458234915181	interacts with	SP2 (interacts with) PIGO
107863	0.455335664760595	1	0.548783175670314	CESC	0.8297187030277	interacts with	SP2 (interacts with) MAN1A2
107864	0.469149564618106	1	0.483262446898146	CESC	0.970796650203994	interacts with	SP2 (interacts with) STT3B
107865	0.393958929318811	1	0.474810231324457	CESC	0.8297187030277	interacts with	SP2 (interacts with) PIGN
107866	0.350027921879261	1	0.410444424573013	CESC	0.852802233197337	interacts with	SP2 (interacts with) SLC35A5
107867	0.326095431049858	1	0.401381372379857	CESC	0.812432896714623	interacts with	SP2 (interacts with) MAN2A2
107868	0.439123837760188	10	0.484278828654661	CESC	0.906758280100918	interacts with	SRCAP (interacts with) FUT11
107869	0.459738648293108	10	0.482126416731634	CESC	0.953564526519218	interacts with	SSRP1 (interacts with) GANAB
107870	0.447188100720752	4	0.538023634969074	CESC	0.83116813399184	interacts with	STAT1 (interacts with) HK3
107871	0.455060091753735	4	0.51365566195168	CESC	0.885924414859351	interacts with	STAT1 (interacts with) ST3GAL5
107872	0.435887350179959	4	0.573102029866762	CESC	0.760575477775392	interacts with	STAT2 (interacts with) LAMP3
107873	0.405657352849843	10	0.488246118038824	CESC	0.830846038222031	interacts with	STAT3 (interacts with) MGAT5
107874	0.390367523941076	10	0.590192860642348	CESC	0.661423663302555	interacts with	STAT3 (interacts with) UGCG
107875	0.413729906299159	10	0.520108023656413	CESC	0.795469186171355	interacts with	STAT3 (interacts with) NEU3
107876	0.332543456110361	10	0.53461806338343	CESC	0.622020614129268	interacts with	STAT3 (interacts with) MAN2A1
107877	0.390720980107741	10	0.40240782979195	CESC	0.970957698088898	interacts with	STAT3 (interacts with) FUT11
107878	0.396822697913958	10	0.517321941125426	CESC	0.767071075799871	interacts with	STAT3 (interacts with) STT3B
107879	0.323585965110585	10	0.544808329544467	CESC	0.593944599527593	interacts with	STAT3 (interacts with) MAN1A2
107880	0.269454036158056	10	0.426202749898299	CESC	0.632220313506549	interacts with	STAT3 (interacts with) GNS
107881	0.268668236980234	10	0.407221474244735	CESC	0.659759501825209	interacts with	STAT3 (interacts with) ACER2
107882	0.287483870651829	10	0.439134853833724	CESC	0.654659652136569	interacts with	STAT3 (interacts with) ASAH1
107883	0.275906082786021	10	0.436741885633752	CESC	0.631737169851836	interacts with	STAT3 (interacts with) PIGN
107884	0.34395967061889	10	0.457793708508765	CESC	0.751342065707537	interacts with	STAT3 (interacts with) SLC35A5
107885	0.306267760369596	10	0.424080564942008	CESC	0.722192398539833	interacts with	STAT3 (interacts with) B3GNT2
107886	0.55714814146475	4	0.559400397736504	CESC	0.995973802877389	interacts with	STAT4 (interacts with) FUT7
107887	0.554811401580914	4	0.610276161124846	CESC	0.909115310285592	interacts with	STAT4 (interacts with) ST8SIA4
107888	0.474926367480349	4	0.643834391487079	CESC	0.737652995490659	interacts with	STAT4 (interacts with) MFNG
107889	0.3716802758409	4	0.434275868930834	CESC	0.855862143010522	interacts with	STAT4 (interacts with) RENBP
107890	0.409522176743614	4	0.532090333290092	CESC	0.769647841958342	interacts with	STAT4 (interacts with) ST3GAL5
107891	0.40515836247091	4	0.44174948645643	CESC	0.917167704530814	interacts with	STAT5A (interacts with) RENBP
107892	0.288435407413516	1	0.405875114768014	CESC	0.710650633455014	interacts with	STAT6 (interacts with) FUT2
107893	0.40435822323861	2	0.412778198296458	CESC	0.979601696279994	interacts with	SVIL (interacts with) RTF1
107894	0.421916865089922	1	0.593705043276558	CESC	0.710650633455014	interacts with	TAF1 (interacts with) NEU3
107895	0.481768178847493	1	0.597216852037738	CESC	0.806688855486365	interacts with	TAF1 (interacts with) MAN1A2
107896	0.554821771411776	1	0.695786990565408	CESC	0.797401760790208	interacts with	TAF1 (interacts with) OGT
107897	0.358482990635427	1	0.412109426657414	CESC	0.869873308997208	interacts with	TAF1 (interacts with) COG5
107898	0.39153563030167	1	0.412716484906038	CESC	0.948679407343784	interacts with	TAF1 (interacts with) RTF1
107899	0.380071869805937	1	0.454573277094382	CESC	0.836106935795577	interacts with	TAF1 (interacts with) ACER2
107900	0.489624320316594	1	0.517957966883839	CESC	0.94529740176079	interacts with	TAF1 (interacts with) NDST2
107901	0.405788289720806	1	0.50069710942036	CESC	0.810446639467468	interacts with	TAF1 (interacts with) SLC35A3
107902	0.408917393400933	1	0.431795998201495	CESC	0.947015245866438	interacts with	TAF1 (interacts with) FUT10
107903	0.338045321170704	1	0.419387828356169	CESC	0.806044663946747	interacts with	TAF1 (interacts with) LAMP2
107904	0.456161425194456	10	0.46645247502182	CESC	0.977937624134414	interacts with	TAF3 (interacts with) FUT11
107905	0.699993648162909	4	0.753288756953777	CESC	0.929250093939557	interacts with	TBX21 (interacts with) FUT7
107906	0.304768634008834	20	0.424878769219919	CESC	0.717307279364398	interacts with	TCF7L1 (interacts with) B4GALNT2
107907	0.391712803790841	21	0.401961982032587	CESC	0.974502120349992	interacts with	TDRD3 (interacts with) ALG5
107908	0.502291093764585	10	0.565221607747172	CESC	0.888662228902727	interacts with	TERF2 (interacts with) COG8
107909	0.456394666572661	10	0.617677989604442	CESC	0.738887695941593	interacts with	TERF2 (interacts with) COG4
107910	0.542583120901705	1	0.601692962028632	CESC	0.901760790208289	interacts with	TET2 (interacts with) MAN1A2
107911	0.49461934428387	1	0.503952805629269	CESC	0.981479493235989	interacts with	TET2 (interacts with) COG5
107912	0.390055843301473	1	0.49034689222701	CESC	0.795469186171355	interacts with	TET2 (interacts with) ACER2
107913	0.379932966470878	1	0.486418646008214	CESC	0.781082241786558	interacts with	TET2 (interacts with) NDST2
107914	0.492273580027259	1	0.506270206412399	CESC	0.972353446424737	interacts with	TET2 (interacts with) SLC35A3
107915	0.583199808157094	1	0.658654421386586	CESC	0.885441271204638	interacts with	TET2 (interacts with) PIGN
107916	0.424043118206608	1	0.473026840287005	CESC	0.896446210006442	interacts with	TET2 (interacts with) COG6
107917	0.465764138529078	1	0.48789598900746	CESC	0.954638179085248	interacts with	TET2 (interacts with) ASAH1
107918	0.394290293430681	9	0.414237188315759	CESC	0.951846682413571	interacts with	TFAP2C (interacts with) HS3ST6
107919	0.456010260613548	10	0.48990860120933	CESC	0.930806806591873	interacts with	TFCP2 (interacts with) GANAB
107920	0.408989615900792	3	0.51487859464756	CESC	0.794341850977024	interacts with	THAP11 (interacts with) COG4
107921	0.48361988420092	3	0.487519411380201	CESC	0.992001288383079	interacts with	THAP11 (interacts with) KHK
107922	0.353451370275785	11	0.460007833822212	CESC	0.768359458879107	interacts with	TP63 (interacts with) HAS3
107923	0.438072499599859	11	0.55943062470324	CESC	0.783068499033713	interacts with	TP63 (interacts with) B3GNT5
107924	0.681559001506329	1	0.704750545659722	CESC	0.967092548851192	interacts with	TTF2 (interacts with) MAN1A2
107925	0.355871845203138	1	0.579879350283769	CESC	0.613699806742538	interacts with	TTF2 (interacts with) NEU3
107926	0.386313267864745	1	0.516674580254486	CESC	0.747691646983036	interacts with	TTF2 (interacts with) PIGN
107927	0.346176238716292	1	0.451296170117369	CESC	0.767071075799871	interacts with	TTF2 (interacts with) FPGT
107928	0.337562470947554	1	0.454540531213751	CESC	0.742645479922697	interacts with	TTF2 (interacts with) MAN2A1
107929	0.344968256155703	1	0.467316462487705	CESC	0.738189821773674	interacts with	TTF2 (interacts with) HS2ST1
107930	0.363821951687204	1	0.420583052999208	CESC	0.865041872450075	interacts with	TTF2 (interacts with) NDST2
107931	0.292705713971808	1	0.474256070267622	CESC	0.617189177582134	interacts with	TTF2 (interacts with) ACER2
107932	0.240309880635743	1	0.427350115177338	CESC	0.56232553145802	interacts with	UBTF (interacts with) COG7
107933	0.312226336918221	4	0.443405672342199	CESC	0.704155035430535	interacts with	USF1 (interacts with) FUT7
107934	0.314535901050296	4	0.437219219816799	CESC	0.719400901868155	interacts with	USF1 (interacts with) RENBP
107935	0.403277161228047	10	0.413328580982452	CESC	0.975681769379429	interacts with	VDR (interacts with) NDST1
107936	0.321863510951687	10	0.401720166298695	CESC	0.801213227399614	interacts with	VDR (interacts with) ACER2
107937	0.370125184836158	7	0.458058194467709	CESC	0.808030921193902	interacts with	WDR5 (interacts with) POMT1
107938	0.4180355922701	10	0.48256596720626	CESC	0.866276572901009	interacts with	XRN2 (interacts with) STT3B
107939	0.427090688614079	10	0.437254484611325	CESC	0.976755421945459	interacts with	XRN2 (interacts with) MAN2A1
107940	0.436713103107548	10	0.500374688441838	CESC	0.872772170925489	interacts with	XRN2 (interacts with) MAN1A2
107941	0.394742363249973	10	0.600609388435881	CESC	0.65723641829504	interacts with	XRN2 (interacts with) NEU3
107942	0.327481856916203	10	0.582648713527701	CESC	0.562057118316513	interacts with	XRN2 (interacts with) POFUT1
107943	0.368488211686211	10	0.455396961937951	CESC	0.809158256388233	interacts with	XRN2 (interacts with) SLC35E1
107944	0.372663030069876	10	0.475379505864661	CESC	0.783927421086536	interacts with	XRN2 (interacts with) HS2ST1
107945	0.419617203132687	10	0.425603248391359	CESC	0.985935151385012	interacts with	XRN2 (interacts with) PIGO
107946	0.28829149397116	10	0.40680963182295	CESC	0.708664376207859	interacts with	XRN2 (interacts with) SLC35A3
107947	0.445370448911518	10	0.482262438081948	CESC	0.923502254670389	interacts with	XRN2 (interacts with) FUT10
107948	0.316487981904147	10	0.442807430292207	CESC	0.714730513205927	interacts with	XRN2 (interacts with) ACER2
107949	0.484495758079091	1	0.486821672231367	CESC	0.995222246081168	interacts with	YY1 (interacts with) MGAT2
107950	0.353698146828584	1	0.472578473613747	CESC	0.748443203779257	interacts with	YY1 (interacts with) GNPNAT1
107951	0.333186936585521	1	0.516528483248593	CESC	0.645050461670603	interacts with	YY1 (interacts with) SLC35F5
107952	0.278636402965904	1	0.412103129372677	CESC	0.676132703457161	interacts with	YY1 (interacts with) MAN1A2
107953	0.305054290909227	1	0.400264234067555	CESC	0.762132273996135	interacts with	YY1 (interacts with) SLC35E3
107954	0.295543284537275	1	0.409535096657023	CESC	0.721655572256818	interacts with	YY1 (interacts with) COG6
107955	0.308478243007397	1	0.405184932360865	CESC	0.761327034571613	interacts with	ZBTB33 (interacts with) ALG10
107956	0.491563200198277	1	0.534144507571225	CESC	0.9202812969723	interacts with	ZBTB33 (interacts with) C1GALT1C1
107957	0.34406945837616	1	0.457351639120244	CESC	0.752308353016964	interacts with	ZBTB33 (interacts with) SLC35A3
107958	0.377712228399958	1	0.496578685202514	CESC	0.760629160403693	interacts with	ZBTB33 (interacts with) OGT
107959	0.343353280907429	1	0.44013108427908	CESC	0.780115954477131	interacts with	ZBTB33 (interacts with) PIGN
108040	0.41492709287599	2	0.415306082806083	COAD_READ.	0.999087444307263	interacts with	AHR (interacts with) UGCG
108041	0.405035224600285	2	0.419352036852037	COAD_READ.	0.965859681142305	interacts with	ARID2 (interacts with) RTF1
108042	0.376696436600881	4	0.467277167277167	COAD_READ.	0.80615202920335	interacts with	ARID3A (interacts with) RPN2
108043	0.502282670089198	4	0.689094239094239	COAD_READ.	0.728902727077518	interacts with	ARID3A (interacts with) POFUT1
108044	0.413907022045309	4	0.442102064602065	COAD_READ.	0.93622503757784	interacts with	ARID3A (interacts with) DPM1
108045	0.328639376364575	4	0.436249861249861	COAD_READ.	0.753328322954692	interacts with	ARID3A (interacts with) B4GALT5
108046	0.40306976358764	4	0.404024031524032	COAD_READ.	0.99763809114821	interacts with	ASCL2 (interacts with) LFNG
108047	0.440623215512635	4	0.448373293373293	COAD_READ.	0.982715121584626	interacts with	ASCL2 (interacts with) NEU1
108048	0.35414383876806	5	0.423236763236763	COAD_READ.	0.836751127335194	interacts with	ATF1 (interacts with) SLC35A5
108049	0.500006635575671	2	0.542907647907648	COAD_READ.	0.920979171140219	interacts with	ATF2 (interacts with) FUT11
108050	0.360230743164096	2	0.537733655233655	COAD_READ.	0.669905518574189	interacts with	ATF2 (interacts with) UGGT1
108051	0.458751270456096	2	0.509425851925852	COAD_READ.	0.900526089757354	interacts with	ATF2 (interacts with) UGCG
108052	0.510043616062915	2	0.548783716283716	COAD_READ.	0.929407343783552	interacts with	ATF2 (interacts with) MGAT5
108053	0.338952945272464	2	0.503028638028638	COAD_READ.	0.673824350440198	interacts with	ATF2 (interacts with) LIPA
108054	0.418818385078048	2	0.469475801975802	COAD_READ.	0.892097917114022	interacts with	ATF2 (interacts with) CSGALNACT2
108055	0.305488666190298	2	0.40038295038295	COAD_READ.	0.762991196048959	interacts with	ATF2 (interacts with) CHST2
108056	0.336630504543056	2	0.406531801531802	COAD_READ.	0.828054541550354	interacts with	ATF7 (interacts with) NDST1
108057	0.397024822893629	2	0.42283189033189	COAD_READ.	0.938966128079875	interacts with	ATRX (interacts with) CSGALNACT2
108058	0.425891458730044	10	0.465770340770341	COAD_READ.	0.914380804122605	interacts with	AUTS2 (interacts with) GALNT11
108059	0.379840513925628	2	0.461105838605839	COAD_READ.	0.823759931286236	interacts with	BACH1 (interacts with) CSGALNACT2
108060	0.271064405377268	2	0.463076645576646	COAD_READ.	0.585355378999356	interacts with	BACH1 (interacts with) UGCG
108061	0.432390185626175	2	0.460576645576646	COAD_READ.	0.938801803736311	interacts with	BACH1 (interacts with) MAN1A2
108062	0.424623004648771	3	0.47020757020757	COAD_READ.	0.903054377583338	interacts with	BARX2 (interacts with) FUT8
108063	0.592545854891257	2	0.599822677322677	COAD_READ.	0.987868377261259	interacts with	BATF3 (interacts with) HK3
108064	0.441109691612805	2	0.449752747252747	COAD_READ.	0.980782650705889	interacts with	BATF3 (interacts with) MGAT1
108065	0.570300475822779	2	0.599894272394272	COAD_READ.	0.950668312845563	interacts with	BATF3 (interacts with) ST8SIA4
108066	0.545626463646754	2	0.578184038184038	COAD_READ.	0.943689945783456	interacts with	BATF3 (interacts with) CHST11
108067	0.458262175850881	2	0.464015984015984	COAD_READ.	0.987599978528101	interacts with	BATF3 (interacts with) DSE
108068	0.395633452284876	2	0.415483149141155	COAD_READ.	0.95222502549788	interacts with	BATF3 (interacts with) HAS1
108069	0.438925301814211	2	0.451828449328449	COAD_READ.	0.971442374791991	interacts with	BATF3 (interacts with) CSGALNACT2
108070	0.516492160954558	2	0.554630647130647	COAD_READ.	0.931236244564926	interacts with	BATF3 (interacts with) ST3GAL6
108071	0.592774389914716	4	0.596940281940282	COAD_READ.	0.993021258320807	interacts with	BRCA1 (interacts with) PIGW
108072	0.519119223683052	2	0.53541625041625	COAD_READ.	0.96956194975306	interacts with	BRD1 (interacts with) ALG12
108073	0.434989616263773	2	0.453542291042291	COAD_READ.	0.959093837234271	interacts with	BRD1 (interacts with) MAN2A2
108074	0.445909475726955	1	0.526855366855367	COAD_READ.	0.84636031780116	interacts with	BRD4 (interacts with) SLC35E1
108075	0.444767066112147	4	0.456228493728494	COAD_READ.	0.974877878576413	interacts with	BRD7 (interacts with) DPM1
108076	0.480882917097218	4	0.48987678987679	COAD_READ.	0.981640541120893	interacts with	C17orf96 (interacts with) PIGW
108077	0.444749498259	4	0.477840215340215	COAD_READ.	0.930749409491089	interacts with	C17orf96 (interacts with) KHK
108078	0.271818108867846	4	0.469923687423687	COAD_READ.	0.578430319948465	interacts with	C17orf96 (interacts with) SLC35F2
108079	0.42306349972504	2	0.430692930563297	COAD_READ.	0.982285683611573	interacts with	CBFA2T3 (interacts with) HS3ST3B1
108080	0.303312968272036	4	0.449098956598957	COAD_READ.	0.675381146660941	interacts with	CBFB (interacts with) DPM1
108081	0.315388885519201	4	0.408984626484627	COAD_READ.	0.771150955550784	interacts with	CBFB (interacts with) ALG5
108082	0.582396475533151	4	0.615993728493728	COAD_READ.	0.945458449645695	interacts with	CBX3 (interacts with) DPM1
108083	0.39876290300316	4	0.413019480519481	COAD_READ.	0.965482070002147	interacts with	CBX3 (interacts with) ALG5
108084	0.234658086169789	4	0.415830558330558	COAD_READ.	0.564311788705175	interacts with	CBX3 (interacts with) PIGX
108085	0.459547799771388	4	0.460883838383838	COAD_READ.	0.99710113807172	interacts with	CBX8 (interacts with) RFNG
108086	0.407559534177797	4	0.413373570873571	COAD_READ.	0.985935151385012	interacts with	CBX8 (interacts with) NEU1
108087	0.40098897050129	1	0.401333666333666	COAD_READ.	0.999141124053894	interacts with	CDK12 (interacts with) GANAB
108088	0.430700422259819	1	0.435540015540016	COAD_READ.	0.98888829244726	interacts with	CDK12 (interacts with) SLC35E1
108089	0.545417003624906	1	0.608344710844711	COAD_READ.	0.896559128240915	interacts with	CDK12 (interacts with) NEU3
108090	0.35484134013995	4	0.651037573537574	COAD_READ.	0.545039725144943	interacts with	CDK8 (interacts with) UGGT2
108091	0.376986961306533	4	0.463440448440448	COAD_READ.	0.813452866652351	interacts with	CDK8 (interacts with) COG5
108092	0.386925795049319	4	0.473253690753691	COAD_READ.	0.817586429031565	interacts with	CDK8 (interacts with) POFUT1
108093	0.529969140086168	4	0.60759879009879	COAD_READ.	0.872235344642474	interacts with	CDK8 (interacts with) ALG5
108094	0.482132191943766	4	0.599223276723277	COAD_READ.	0.804595232982607	interacts with	CDK8 (interacts with) DPM1
108095	0.338787077034339	4	0.559033189033189	COAD_READ.	0.606023190895426	interacts with	CDK8 (interacts with) RPN2
108096	0.315170938860009	4	0.534407814407814	COAD_READ.	0.589757354520077	interacts with	CDK8 (interacts with) LAMP1
108097	0.373313332517219	4	0.571693584193584	COAD_READ.	0.652995490659223	interacts with	CDX2 (interacts with) POFUT1
108098	0.390278690007056	4	0.468676601176601	COAD_READ.	0.832724930212583	interacts with	CDX2 (interacts with) DPM1
108099	0.402903545170025	4	0.428237318237318	COAD_READ.	0.940841743611767	interacts with	CDX2 (interacts with) NEU1
108100	0.349484358363465	4	0.403157953157953	COAD_READ.	0.866867081812326	interacts with	CDX2 (interacts with) COG1
108101	0.385561776608857	4	0.506433843933844	COAD_READ.	0.761327034571613	interacts with	CEBPA (interacts with) B3GNT8
108102	0.391447415780006	4	0.406618104118104	COAD_READ.	0.96269057333047	interacts with	CEBPA (interacts with) DPM1
108103	0.354449991574884	4	0.538424075924076	COAD_READ.	0.658310070861069	interacts with	CEBPA (interacts with) POFUT1
108104	0.405635658361394	4	0.413561438561439	COAD_READ.	0.980835301696371	interacts with	CEBPB (interacts with) CTSA
108105	0.433792899594382	4	0.437598512598513	COAD_READ.	0.99130341421516	interacts with	CEBPB (interacts with) NEU1
108106	0.580944328736899	4	0.61057498057498	COAD_READ.	0.951470904015461	interacts with	CEBPB (interacts with) DPM1
108107	0.405737696381351	4	0.497700632700633	COAD_READ.	0.8152243933863	interacts with	CEBPB (interacts with) POFUT1
108108	0.388056728108934	4	0.434653402153402	COAD_READ.	0.892795791281941	interacts with	CEBPB (interacts with) RPN2
108109	0.249307428533459	1	0.438660506160506	COAD_READ.	0.568337985827786	interacts with	CHD1 (interacts with) UGGT1
108110	0.355779435905993	2	0.443278665778666	COAD_READ.	0.802608975735452	interacts with	CHD2 (interacts with) NDST2
108111	0.409460324706191	2	0.589263514263514	COAD_READ.	0.694867940734378	interacts with	CHD2 (interacts with) MAN2A2
108112	0.313700322266191	2	0.498346375846376	COAD_READ.	0.629482499463174	interacts with	CHD2 (interacts with) RTF1
108113	0.237999025480639	2	0.434183316683317	COAD_READ.	0.548153317586429	interacts with	CHD2 (interacts with) NDST1
108114	0.390967728792759	1	0.408923576423576	COAD_READ.	0.956089967255355	interacts with	CHD4 (interacts with) NEU3
108115	0.42257564157948	1	0.438243145743146	COAD_READ.	0.964249288743357	interacts with	CHD4 (interacts with) GANAB
108116	0.451162068646904	1	0.502222777222777	COAD_READ.	0.898330559879757	interacts with	CHD4 (interacts with) UGGT1
108117	0.401891449637853	2	0.435106005106005	COAD_READ.	0.923663302555293	interacts with	CIITA (interacts with) LAMP3
108118	0.375205863494461	2	0.405979020979021	COAD_READ.	0.924200128838308	interacts with	CIITA (interacts with) A4GALT
108119	0.405822127634087	2	0.440922688422688	COAD_READ.	0.920392935745343	interacts with	CLOCK (interacts with) FUT11
108120	0.358874469674744	3	0.464082861582862	COAD_READ.	0.773298260682843	interacts with	CPSF3L (interacts with) B3GALT6
108121	0.376352302857832	3	0.432919025419025	COAD_READ.	0.869336482714194	interacts with	CPSF3L (interacts with) RFNG
108122	0.373366306199944	3	0.401910866910867	COAD_READ.	0.92897788275714	interacts with	CPSF3L (interacts with) B3GAT3
108123	0.405363098268133	3	0.459396714396714	COAD_READ.	0.882381361391454	interacts with	CPSF3L (interacts with) POMGNT1
108124	0.408113161264331	2	0.487172827172827	COAD_READ.	0.837717414644621	interacts with	CREBBP (interacts with) MAN1A2
108125	0.379622493139242	2	0.408315018315018	COAD_READ.	0.929729439553361	interacts with	CREBBP (interacts with) SLC35E1
108126	0.332014517971947	2	0.412510267510267	COAD_READ.	0.804863646124114	interacts with	CREBBP (interacts with) CHST3
108127	0.400055855004991	2	0.556095848595849	COAD_READ.	0.719400901868155	interacts with	CREBBP (interacts with) NDST1
108128	0.412803356022128	3	0.431713564213564	COAD_READ.	0.956197326748618	interacts with	CTBP1 (interacts with) B3GAT3
108129	0.314114958360181	2	0.494116994116994	COAD_READ.	0.635709684346146	interacts with	CTNNB1 (interacts with) MGAT5
108130	0.39348739574314	2	0.436510434010434	COAD_READ.	0.90143869443848	interacts with	CTNNB1 (interacts with) B4GALT5
108131	0.275349414858756	2	0.42954600954601	COAD_READ.	0.641024264547992	interacts with	CTNNB1 (interacts with) GLCE
108132	0.504292106251148	1	0.527719225219225	COAD_READ.	0.95560684953567	interacts with	DCP1A (interacts with) STT3B
108133	0.378590402297257	3	0.413384948384948	COAD_READ.	0.915830157281658	interacts with	DICER1 (interacts with) MGAT2
108134	0.447990132854047	4	0.452704795204795	COAD_READ.	0.989585570109513	interacts with	E2F1 (interacts with) PIGW
108135	0.514907928810387	4	0.517379842379842	COAD_READ.	0.995222246081168	interacts with	E2F1 (interacts with) ALG3
108136	0.461966310477155	4	0.528691308691309	COAD_READ.	0.873792140863217	interacts with	E2F1 (interacts with) DPM1
108137	0.398646517036038	4	0.418318348318348	COAD_READ.	0.952974017607902	interacts with	E2F1 (interacts with) DPM2
108138	0.369488034869718	4	0.508295038295038	COAD_READ.	0.726916469830363	interacts with	E2F1 (interacts with) SLC35C2
108139	0.305090764936159	4	0.450549450549451	COAD_READ.	0.677152673394889	interacts with	E2F1 (interacts with) RPN2
108140	0.300320491309325	4	0.428129648129648	COAD_READ.	0.701470904015461	interacts with	E2F1 (interacts with) POFUT1
108141	0.44175753951629	4	0.538233988233988	COAD_READ.	0.820753704101353	interacts with	E2F4 (interacts with) COG4
108142	0.318867226735758	4	0.452216117216117	COAD_READ.	0.705121322739961	interacts with	E2F4 (interacts with) ALG3
108143	0.325350737320085	4	0.478043345543346	COAD_READ.	0.680588361606184	interacts with	E2F4 (interacts with) DPM1
108144	0.291574750137129	4	0.400727050727051	COAD_READ.	0.727614343998282	interacts with	E2F6 (interacts with) DPM1
108145	0.335084220529787	6	0.408077200577201	COAD_READ.	0.821129482499463	interacts with	E2F7 (interacts with) ALG10
108146	0.380078956068864	6	0.40002886002886	COAD_READ.	0.950128838307924	interacts with	E2F7 (interacts with) STT3A
108147	0.341368512848542	6	0.49548174048174	COAD_READ.	0.688962851621215	interacts with	EED (interacts with) ALG8
108148	0.310110441684148	6	0.493653846153846	COAD_READ.	0.628194116383938	interacts with	EED (interacts with) DPAGT1
108149	0.26405083053086	6	0.434671162171162	COAD_READ.	0.607472621859566	interacts with	EED (interacts with) STT3A
108150	0.41260989010989	1	0.41260989010989	COAD_READ.	1.0	interacts with	EHMT2 (interacts with) COG4
108151	0.576079089950681	4	0.773141303141303	COAD_READ.	0.745114880824565	interacts with	ELF1 (interacts with) COG3
108152	0.206296310339149	4	0.404855422355422	COAD_READ.	0.509555507837664	interacts with	ELF1 (interacts with) SLC35B3
108153	0.245304789810909	4	0.421194361194361	COAD_READ.	0.582402834442774	interacts with	ELF1 (interacts with) ALG11
108154	0.497979769318077	4	0.595134865134865	COAD_READ.	0.836751127335194	interacts with	ELF1 (interacts with) ALG5
108155	0.276129237012719	4	0.486865634365634	COAD_READ.	0.567156968005154	interacts with	ELF1 (interacts with) COG5
108156	0.310833658682596	4	0.491612276612277	COAD_READ.	0.632273996134851	interacts with	ELF1 (interacts with) POFUT1
108157	0.41022853908671	4	0.476833721833722	COAD_READ.	0.860317801159545	interacts with	ELF1 (interacts with) DPM1
108158	0.226764702309715	2	0.407778055278055	COAD_READ.	0.556098346575048	interacts with	EP400 (interacts with) MAN2A2
108159	0.211360135432768	2	0.408001720501721	COAD_READ.	0.518037363109298	interacts with	EP400 (interacts with) NDST1
108160	0.343817536875836	1	0.508021978021978	COAD_READ.	0.676776894996779	interacts with	ERCC6 (interacts with) MAN1A2
108161	0.412653523110631	1	0.470752025752026	COAD_READ.	0.876583637534894	interacts with	ERCC6 (interacts with) NDST2
108162	0.456663583118382	2	0.496888389388389	COAD_READ.	0.919046596521366	interacts with	FOSL2 (interacts with) UGCG
108163	0.283137729602729	2	0.443217615717616	COAD_READ.	0.638823276787632	interacts with	FOSL2 (interacts with) FUT11
108164	0.393790096525763	2	0.406986346986347	COAD_READ.	0.967575692505905	interacts with	FOSL2 (interacts with) NDST1
108165	0.246781330110199	2	0.434708521729814	COAD_READ.	0.567693794288168	interacts with	FOSL2 (interacts with) HS3ST3B1
108166	0.411611062392145	3	0.470398212898213	COAD_READ.	0.875026841314151	interacts with	FOXA1 (interacts with) GNPNAT1
108167	0.460303194407768	3	0.468093018093018	COAD_READ.	0.983358385226541	interacts with	FOXA1 (interacts with) FUT8
108168	0.431221496577393	4	0.448758463758464	COAD_READ.	0.960921144452198	interacts with	FOXD2 (interacts with) CTSA
108169	0.341027775102287	5	0.430747585747586	COAD_READ.	0.791711402190251	interacts with	FOXO1 (interacts with) COG6
108170	0.288194477962569	5	0.421189921189921	COAD_READ.	0.684238780330685	interacts with	FOXO1 (interacts with) SULF2
108171	0.759646635425033	2	0.766144966144966	COAD_READ.	0.991518144728366	interacts with	FOXP3 (interacts with) ST8SIA4
108172	0.622199138155762	2	0.667414807414807	COAD_READ.	0.93225252308353	interacts with	FOXP3 (interacts with) HK3
108173	0.585102894921985	2	0.661646131646132	COAD_READ.	0.884313936010307	interacts with	FOXP3 (interacts with) CHST11
108174	0.452885961144765	2	0.53212814962815	COAD_READ.	0.85108438909169	interacts with	FOXP3 (interacts with) LIPA
108175	0.604522427817333	2	0.686858419358419	COAD_READ.	0.880126691002792	interacts with	FOXP3 (interacts with) ST8SIA1
108176	0.516277213782448	2	0.605351037851038	COAD_READ.	0.852855915825639	interacts with	FOXP3 (interacts with) CSGALNACT2
108177	0.365637135304035	2	0.45754995004995	COAD_READ.	0.799119604895856	interacts with	FOXP3 (interacts with) ST3GAL5
108178	0.506602809902144	2	0.611046176046176	COAD_READ.	0.829074511488082	interacts with	FOXP3 (interacts with) MAN1C1
108179	0.504815229072883	2	0.589277985159147	COAD_READ.	0.856667382435044	interacts with	FOXP3 (interacts with) ST6GALNAC5
108180	0.557828566197956	2	0.5926332001332	COAD_READ.	0.941271204638179	interacts with	FOXP3 (interacts with) DSEL
108181	0.348343260493116	2	0.42749444999445	COAD_READ.	0.81484861498819	interacts with	FOXP3 (interacts with) NAGK
108182	0.466705519014543	2	0.549857087357087	COAD_READ.	0.848776036074726	interacts with	FOXP3 (interacts with) ST3GAL6
108183	0.487938782461544	2	0.529804362304362	COAD_READ.	0.920979171140219	interacts with	FOXP3 (interacts with) FUT11
108184	0.436672727860859	2	0.482092074592075	COAD_READ.	0.9057869873309	interacts with	FOXP3 (interacts with) UGCG
108185	0.407402449833468	2	0.421756854256854	COAD_READ.	0.965965213656861	interacts with	FOXP3 (interacts with) B4GALNT1
108186	0.315087004589904	5	0.411572871572872	COAD_READ.	0.76556796220743	interacts with	GABPA (interacts with) SLC35A5
108187	0.338306396112656	5	0.427136474636475	COAD_READ.	0.79203349796006	interacts with	GABPA (interacts with) PIGK
108188	0.481460575363227	11	0.504592352092352	COAD_READ.	0.954157496376617	interacts with	GAPDH (interacts with) GPI
108189	0.27700273475719	4	0.43017982017982	COAD_READ.	0.643923126476272	interacts with	GATAD1 (interacts with) POFUT1
108190	0.235041104572187	4	0.419261294261294	COAD_READ.	0.560607687352373	interacts with	GATAD1 (interacts with) SLC35C2
108191	0.803659606805777	2	0.822693417693418	COAD_READ.	0.976864029201782	interacts with	GLI1 (interacts with) SULF1
108192	0.68659657005784	2	0.743639971139971	COAD_READ.	0.923291642063449	interacts with	GLI1 (interacts with) GFPT2
108193	0.572346371011087	2	0.602726995226995	COAD_READ.	0.949594717912931	interacts with	GLI1 (interacts with) CHST3
108194	0.290076746554092	12	0.436721056721057	COAD_READ.	0.664215159974232	interacts with	GTF2B (interacts with) ALG14
108195	0.437944624625964	12	0.541486291486291	COAD_READ.	0.808782477990122	interacts with	GTF2B (interacts with) CTBS
108196	0.376817475956272	12	0.530844433344433	COAD_READ.	0.709845394030492	interacts with	GTF2B (interacts with) FPGT
108197	0.383702858590125	12	0.443345543345543	COAD_READ.	0.865471333476487	interacts with	GTF2B (interacts with) PIGY
108198	0.379531287879205	4	0.436872571872572	COAD_READ.	0.868745973802877	interacts with	GTF2I (interacts with) COG5
108199	0.327452126330831	3	0.468169330669331	COAD_READ.	0.699430964140004	interacts with	H2AFX (interacts with) DPM2
108200	0.354939708253	3	0.41990453990454	COAD_READ.	0.84528666523513	interacts with	H2AFX (interacts with) B3GAT3
108201	0.355898833290394	1	0.492291042291042	COAD_READ.	0.722943955336053	interacts with	HCFC1 (interacts with) NEU3
108202	0.366351406359727	1	0.468258130758131	COAD_READ.	0.782370624865793	interacts with	HCFC1 (interacts with) UGGT1
108203	0.410710032636702	1	0.412437007437007	COAD_READ.	0.995812754992484	interacts with	HCFC1 (interacts with) GANAB
108204	0.378424175852777	1	0.479543234543234	COAD_READ.	0.78913463603178	interacts with	HCFC1 (interacts with) COG8
108205	0.370331086165046	1	0.434470806970807	COAD_READ.	0.852372772170925	interacts with	HCFC1 (interacts with) SLC35E1
108206	0.311801164711032	1	0.469086746586747	COAD_READ.	0.664698303628946	interacts with	HCFC1 (interacts with) NDST1
108207	0.459328418819507	13	0.49042069042069	COAD_READ.	0.93660081597595	interacts with	HDAC3 (interacts with) GNPDA1
108208	0.585534092177497	2	0.640436507936508	COAD_READ.	0.914273444629341	interacts with	HEYL (interacts with) B4GALNT1
108209	0.3282065318697	4	0.50716144966145	COAD_READ.	0.647144084174361	interacts with	HNF1B (interacts with) COG1
108210	0.701124231654348	4	0.748112165612166	COAD_READ.	0.937191324887267	interacts with	HNF4A (interacts with) POFUT1
108211	0.56553633870603	4	0.643033078033078	COAD_READ.	0.879482499463174	interacts with	HNF4A (interacts with) B4GALT5
108212	0.236827744092212	4	0.439098956598957	COAD_READ.	0.539349366544986	interacts with	HNF4A (interacts with) NEU3
108213	0.477017688488593	4	0.612650682650683	COAD_READ.	0.77861284088469	interacts with	HNF4A (interacts with) SLC35C2
108214	0.349889227752659	4	0.404677544677545	COAD_READ.	0.864612411423663	interacts with	HNF4A (interacts with) MGAT4B
108215	0.342578818257233	4	0.588976301476302	COAD_READ.	0.581651277646554	interacts with	HNF4A (interacts with) DPM1
108216	0.483578491600019	4	0.50479686979687	COAD_READ.	0.95796650203994	interacts with	HNF4A (interacts with) CTSA
108217	0.29442466583115	4	0.495486735486735	COAD_READ.	0.5942130126691	interacts with	HNF4A (interacts with) LAMP1
108218	0.321573496648652	4	0.483749583749584	COAD_READ.	0.664751986257247	interacts with	HNF4A (interacts with) ST6GAL1
108219	0.466487414864857	4	0.480228105228105	COAD_READ.	0.97138715911531	interacts with	HNF4A (interacts with) NEU1
108220	0.298205675891283	4	0.443298645798646	COAD_READ.	0.672697015245866	interacts with	HNF4A (interacts with) COG3
108221	0.353626410853838	4	0.406100288600289	COAD_READ.	0.870785913678334	interacts with	HNF4A (interacts with) HS6ST1
108222	0.426295846001396	3	0.446878954378954	COAD_READ.	0.953940304917329	interacts with	HSF1 (interacts with) RFNG
108223	0.665774125523173	2	0.721800976800977	COAD_READ.	0.922379086370712	interacts with	INO80 (interacts with) RTF1
108224	0.387259088452121	2	0.403549228549229	COAD_READ.	0.95963283053304	interacts with	INO80 (interacts with) CHSY1
108225	0.387391271092017	2	0.456353923853924	COAD_READ.	0.848883401331329	interacts with	IRF1 (interacts with) HK3
108226	0.382056828481565	2	0.419631757131757	COAD_READ.	0.910457375993129	interacts with	IRF1 (interacts with) LAMP3
108227	0.396650169671428	2	0.400868020868021	COAD_READ.	0.98947820485291	interacts with	IRF1 (interacts with) ST8SIA4
108228	0.388569829220597	2	0.416064768564769	COAD_READ.	0.933916684560876	interacts with	IRF1 (interacts with) CHST2
108229	0.360814561291666	8	0.441171883671884	COAD_READ.	0.817854842173073	interacts with	IRF3 (interacts with) PIGQ
108230	0.636681096979035	2	0.671883949383949	COAD_READ.	0.947605754777754	interacts with	IRF4 (interacts with) MFNG
108231	0.702277152246151	2	0.731288433788434	COAD_READ.	0.960328537685205	interacts with	IRF4 (interacts with) ST8SIA4
108232	0.472332064989623	2	0.503755966255966	COAD_READ.	0.937620785913678	interacts with	IRF4 (interacts with) ST8SIA1
108233	0.351319582122003	2	0.42776529026529	COAD_READ.	0.821290530384368	interacts with	IRF4 (interacts with) ST3GAL5
108234	0.544943557385043	2	0.549783827283827	COAD_READ.	0.991196048958557	interacts with	IRF4 (interacts with) CHST11
108235	0.358729867137372	2	0.425984570984571	COAD_READ.	0.842119390165343	interacts with	IRF4 (interacts with) LIPA
108236	0.391244193915979	2	0.506258463758464	COAD_READ.	0.77281511702813	interacts with	IRF4 (interacts with) HK3
108237	0.382120821314777	2	0.409606782106782	COAD_READ.	0.932896714623148	interacts with	IRF4 (interacts with) NAGK
108238	0.431591073731936	2	0.466338661338661	COAD_READ.	0.925488511917543	interacts with	IRF4 (interacts with) UGCG
108239	0.543951794454242	2	0.624552146640386	COAD_READ.	0.870946961563238	interacts with	IRF4 (interacts with) HS3ST3B1
108240	0.395366524237579	2	0.449023754023754	COAD_READ.	0.880502469400902	interacts with	IRF4 (interacts with) CHST15
108241	0.399648738635211	2	0.405747585747586	COAD_READ.	0.984968864075585	interacts with	IRF4 (interacts with) NDST1
108242	0.472337397052879	2	0.495422355422355	COAD_READ.	0.953403478634314	interacts with	IRF4 (interacts with) MGAT1
108243	0.39472514941218	2	0.440770895770896	COAD_READ.	0.895533605325317	interacts with	IRF4 (interacts with) ST6GALNAC6
108244	0.412729706411261	2	0.428844766344766	COAD_READ.	0.962422160188963	interacts with	IRF4 (interacts with) MAN2A1
108245	0.484037001220811	4	0.511147463647464	COAD_READ.	0.946961563238136	interacts with	JARID2 (interacts with) POFUT1
108246	0.526262373267822	2	0.527253024753025	COAD_READ.	0.998121108009448	interacts with	JMJD1C (interacts with) CSGALNACT2
108247	0.475576053750845	2	0.496137473637474	COAD_READ.	0.958557010951256	interacts with	JMJD1C (interacts with) NDST2
108248	0.375399803966344	2	0.4076332001332	COAD_READ.	0.920925488511918	interacts with	JMJD1C (interacts with) IDS
108249	0.338712250100483	2	0.473653013653014	COAD_READ.	0.715106291604037	interacts with	JMJD1C (interacts with) XYLT1
108250	0.365296063240556	9	0.430843045843046	COAD_READ.	0.847863431393601	interacts with	JMJD6 (interacts with) SLC35B1
108251	0.26063108952818	1	0.424317071817072	COAD_READ.	0.614236633025553	interacts with	KDM2B (interacts with) NEU3
108252	0.282990725171448	3	0.463188755688756	COAD_READ.	0.610961992699163	interacts with	KDM4C (interacts with) FKTN
108253	0.427206737057231	3	0.43245337995338	COAD_READ.	0.987867726003865	interacts with	KDM4C (interacts with) PIGO
108254	0.38453280400081	1	0.41713702963703	COAD_READ.	0.921838093193043	interacts with	KDM5A (interacts with) NEU3
108255	0.366483058551451	1	0.415814740814741	COAD_READ.	0.881361391453726	interacts with	KDM5A (interacts with) GNS
108256	0.370931001707118	3	0.402874625374625	COAD_READ.	0.920710757998712	interacts with	KDM5B (interacts with) ST3GAL4
108257	0.227539821380797	2	0.411915626110932	COAD_READ.	0.552394245222246	interacts with	KDM6B (interacts with) HS3ST3B1
108258	0.263846060487004	3	0.405555278055278	COAD_READ.	0.650579772385656	interacts with	KLF4 (interacts with) ACER2
108259	0.268254458661373	3	0.488374125874126	COAD_READ.	0.54928065278076	interacts with	KLF4 (interacts with) UAP1
108260	0.362239948334537	3	0.513297258297258	COAD_READ.	0.705711831651278	interacts with	KLF4 (interacts with) GNE
108261	0.451619761671297	3	0.505089632589633	COAD_READ.	0.894137856989478	interacts with	KLF4 (interacts with) SLC35A3
108262	0.219386545772363	3	0.429233544233544	COAD_READ.	0.511112304058407	interacts with	KLF4 (interacts with) B3GNT5
108263	0.652211392045419	3	0.68960119258838	COAD_READ.	0.945780545415503	interacts with	KLF4 (interacts with) B3GNT6
108264	0.486128986669571	3	0.619653124653125	COAD_READ.	0.784517929997853	interacts with	KLF4 (interacts with) ST6GALNAC1
108265	0.582370679500162	3	0.610077663802104	COAD_READ.	0.954584496456947	interacts with	KLF4 (interacts with) B4GALNT2
108266	0.307531131768167	3	0.467228604728605	COAD_READ.	0.658202705604466	interacts with	KLF4 (interacts with) HPSE
108267	0.223050042017725	3	0.424800754800755	COAD_READ.	0.525069787416792	interacts with	KLF4 (interacts with) GALNT3
108268	0.260879671261623	3	0.436000943500944	COAD_READ.	0.598346575048314	interacts with	KLF4 (interacts with) SLC35A1
108269	0.330469629146889	3	0.526557886557886	COAD_READ.	0.627603607472622	interacts with	KLF4 (interacts with) ST3GAL4
108270	0.252964297351779	3	0.483007270507271	COAD_READ.	0.523727721709255	interacts with	KLF4 (interacts with) GALNT7
108271	0.467070063999417	3	0.471040071040071	COAD_READ.	0.991571827356667	interacts with	KLF4 (interacts with) HYAL1
[truncated: 20,524 more rows]
