# Supplementary material for: A systems-based framework to computationally describe putative transcription factors and signaling pathways regulating glycan biosynthesis
Source: publisher site journal article supplement (doi:10.3762/bjoc.17.119), 2021-07-22
Supplement: Additional file 2 [file 1860-5397-17-119-S2.cys › CytoscapeSession-2021_03_21-12_01/tables/105658-Cistrome+Cancer+TF%2DGlycogene+Networks/SHARED_ATTRS-org.cytoscape.model.CyNetwork-105658+shared+network.cytable]

CyCSV-Version	1
SUID	shared name
java.lang.Long	java.lang.String
105658 shared network
53292	Cistrome Cancer TF-Glycogene Networks
105674	BRCA_1_clustTable.tsv
106825	BRCA_2_clustTable.tsv
107263	CESC_clustTable.tsv
107960	COAD_READ._clustTable.tsv
108538	GBM._clustTable.tsv
109659	HNSC_clustTable.tsv
110777	KICH_clustTable.tsv
111080	KIRC_clustTable.tsv
112204	KIRP_clustTable.tsv
113200	LAML_clustTable.tsv
114920	LGG_clustTable.tsv
116589	LIHC_clustTable.tsv
116985	LUAD_clustTable.tsv
117543	LUSC_clustTable.tsv
117847	MESO_clustTable.tsv
118033	OV_clustTable.tsv
118318	PAAD_clustTable.tsv
120164	PCPG_clustTable.tsv
120744	PRAD_clustTable.tsv
121907	SARC_clustTable.tsv
122667	SKCM_clustTable.tsv
123032	STES._clustTable.tsv
123839	TGCT_clustTable.tsv
124859	THCA_clustTable.tsv
126090	THYM_clustTable.tsv
127699	UCEC_clustTable.tsv
128148	UVM_clustTable.tsv
128575	ACC_clustTable.tsv
105658
159940	BLCA_clustTable.tsv
