# Supplementary material for: A systems-based framework to computationally describe putative transcription factors and signaling pathways regulating glycan biosynthesis
Source: publisher site journal article supplement (doi:10.3762/bjoc.17.119), 2021-07-22
Supplement: Additional file 2 [file 1860-5397-17-119-S2.cys › CytoscapeSession-2021_03_21-12_01/tables/105658-Cistrome+Cancer+TF%2DGlycogene+Networks/SHARED_ATTRS-org.cytoscape.model.CyNode-105658+shared+node.cytable]

CyCSV-Version	1
SUID	shared name
java.lang.Long	java.lang.String
105658 shared node
105684	ADNP
105685	FUT7
105686	AFF4
105687	MAN1A2
105688	STT3B
105689	NEU3
105690	FUT11
105694	MAN2A1
105691	ACER2
105692	COG5
105985	UGCG
105697	GALNT10
105705	UGGT1
105695	SLC35A3
105950	SLC35D1
105702	SLC35A5
105696	SLC35F5
105906	HS2ST1
105709	HAS2
105883	GM2A
105701	ATF1
105704	ATF2
105713	FKTN
105710	ATF7IP
105711	ALG10
105712	ATRX
105714	BACH1
105715	CSGALNACT2
105721	BATF
105765	NAGK
105763	CHST12
105912	RENBP
105723	BATF3
105724	MGAT1
105736	C17orf49
105754	B3GAT3
105738	CASP8AP2
105727	ALG10B
105806	ST3GAL2
105752	CBX8
105744	RFNG
105753	GALK1
105755	CCDC101
105756	CDK8
105757	CDK9
105758	DPM2
105746	ST6GALNAC6
105880	TSTA3
105769	CHD1
105770	CHD2
105748	MAN2A2
105893	MGAT5
105773	CHD4
105998	GANAB
105774	CHD8
105775	CIITA
105780	CPSF3L
105781	B3GALT6
105786	CREB3
105874	PIGO
105794	CTNNB1
105795	DEK
105707	B3GNT5
105804	EBF1
105716	MAN1A1
105813	EGLN2
105821	EHMT2
105784	B4GALNT4
105822	ELF1
105823	COG3
105825	ELF2
105826	ELK3
105827	ELK4
105731	FAM20B
105805	CSGALNACT1
105830	ERCC6
105832	ERG
105766	MFNG
105833	CHSY3
105835	CHST7
105839	ETS1
105834	ST8SIA4
105848	FLI1
105850	FOXA1
105856	FOXO1
105858	FOXP3
105861	GABPA
105866	GLYR1
105791	COG7
105867	ALG1
105871	GTF2I
105872	H2AFX
105873	HCFC1
105875	HECTD1
105876	HES4
105879	HSF1
105917	B4GALT2
105882	IKZF1
105776	LAMP3
105860	NPL
105885	INO80
105700	RTF1
105841	HS3ST3B1
105887	IRF1
105859	HK3
105782	B4GALT7
105888	IRF4
105889	IRF5
105890	IRF8
105884	LIPA
105779	DSE
105891	JDP2
105892	JMJD1C
105894	JMJD6
106005	COG1
105844	EXTL2
105903	KDM3A
105904	KDM5A
105911	LYL1
105777	MAN2B1
105749	IDUA
106030	B3GALT4
105914	MAFB
105916	MAZ
105924	MED1
105925	MEF2A
105717	CHSY1
105926	MEF2C
105931	MRE11A
105932	MSX1
105933	MXD3
105934	MYBL1
105802	FUT1
105937	MYH11
105943	NFAT5
105946	NFYC
105747	ST3GAL3
105762	MOGS
105947	NIPBL
105948	NPAT
105949	NR2C2
105955	PCGF1
105957	PHF6
105958	PIAS1
105959	POLR2B
105960	POLR3A
105962	PRDM1
105718	CHST11
105963	PRKDC
105964	RAC3
105967	RBBP5
105968	RBL2
105824	COG6
105905	GNS
105969	RCOR1
105970	REST
105974	RFX7
105703	GALNT4
105975	RNF2
105981	RUNX2
105982	RUNX3
105984	SIN3A
105759	PIGQ
105722	DPM3
105986	SIX5
106014	GALNT1
105989	SMC1A
105990	SMC3
105991	SOX10
105807	CHST3
105811	ST3GAL6
105993	SPDEF
105838	CHST2
105994	SRCAP
105999	STAT1
106000	HPSE
106001	STAT2
106002	STAT4
106006	TAF1
105771	OGT
106007	TCF12
106011	TDRD3
106013	TEAD1
106016	TET2
106021	USF1
105789	B4GALT3
106023	VEZF1
106026	YAP1
106029	ZBTB17
106836	AHR
105699	ARID2
105732	SLC35E3
106856	FUCA1
106857	ST3GAL5
106860	MGAT4A
105730	PIGN
105728	BRCA1
105729	PIGW
105733	BRD1
105734	ALG12
105772	NDST2
106843	BRD4
106844	SLC35E1
105792	POFUT1
105739	CBFB
105745	CBX7
106853	MAN1C1
105778	GAL3ST4
106848	CDK12
106891	COG8
105764	CEBPA
106849	CLOCK
105785	CREB1
105790	CREBBP
105796	E2F1
105735	PMM1
105803	E2F7
105878	DPAGT1
106893	STT3A
105819	EHF
105829	EP400
105941	HAS3
106859	GALNT7
105920	ST6GALNAC1
105923	NDST1
106838	B3GNT2
106863	GAPDH
106864	GPI
105862	GATA6
105810	FUT4
106866	GRHL1
105742	CMAS
106867	HIF1A
105877	HINFP
105886	INTS3
106871	IRF2
105750	MGAT3
105907	KDM5B
105976	FPGT
106875	LEF1
105720	ST6GAL2
105800	KHK
105919	MECOM
106032	C1GALT1C1
105928	MEIS1
105942	MZF1
105896	FKRP
105954	PIGM
106835	PIGK
105761	POMT1
105953	PBX1
105956	PHF20
105965	RB1
105908	B3GALNT2
105855	GNPNAT1
105978	RUNX1
105983	RXRA
105973	COG2
106885	SIRT6
106879	ALG6
105987	SMAD4
105997	SSRP1
106003	STAT5A
106889	TBX21
106009	TCF7L1
106012	ALG5
106892	COG4
106890	THAP11
106017	TP63
106019	TTF2
106020	UBTF
106024	WDR5
106025	XRN2
106028	YY1
106868	MGAT2
106031	ZBTB33
105854	RPN2
105799	DPM1
107279	B4GALT5
106837	ASCL2
106846	LFNG
105708	HAS1
106845	CBFA2T3
105741	CBX3
105966	UGGT2
105767	CEBPB
105768	A4GALT
105783	POMGNT1
105793	CTBP1
105851	GLCE
106850	DCP1A
105797	ALG3
105801	E2F6
107285	EED
107286	ALG8
107281	SLC35B3
107300	ALG11
107295	FOSL2
105979	SULF2
105840	ST8SIA1
105857	DSEL
105863	GATAD1
106883	SULF1
105719	GFPT2
105868	GTF2B
105869	CTBS
107332	PIGY
107304	HDAC3
107305	GNPDA1
105918	MGAT4B
106855	ST6GAL1
106872	IRF3
106861	CHST15
107311	JARID2
105922	IDS
106854	XYLT1
105798	SLC35B1
107313	KDM2B
107315	KDM6B
107317	KLF4
105820	UAP1
107297	GNE
107352	B4GALNT2
105751	HYAL1
107318	KLF5
105809	TPST1
105927	SLC35F1
107327	POFUT2
105915	MAX
105852	PIGH
107322	MBD2
107323	MBD3
107324	MED12
106878	MEIS3
105935	MYBL2
106887	EXTL1
107326	NCOR2
107329	NFYA
105843	ARSB
107334	PHF8
107335	SLC35A2
107350	LAMP2
107274	B4GALT1
107338	RYBP
105845	SLC35B4
107339	SETDB1
107341	SMAD1
107344	SMARCC1
105995	SREBF2
107347	STAT3
106004	SUMO2
107349	SVIL
105864	ALG13
107351	TAF3
106008	TCF7
106010	TCF7L2
106018	TRIM28
106882	GFPT1
107278	FUT10
105706	ATF3
107972	ATF7
107306	GALNT2
105936	RPN1
105725	BCAT1
107275	BCL6
105726	BMI1
107276	BRD2
107277	BRD3
108023	POMT2
107977	BRD7
107978	C17orf96
107990	B4GALNT1
108026	GLA
105743	CBX4
106847	CBX6
107309	GBA
107282	DNMT3A
107299	EXTL3
107284	E2F3
107987	E2F4
105816	EGR2
107292	ERCC3
105831	ERF
107328	PAPSS2
107319	ABO
105902	GNB1
105842	ETV1
105846	EZH1
105847	FANCD2
105897	GBGT1
107310	NAAA
107294	FOSL1
107293	HK1
107298	FOXK1
105853	FOXM1
106862	FUS
107992	ALG14
108008	DAD1
107971	NEU1
105870	GTF2F1
107302	GTF3C2
107307	EXT2
108002	NANS
105895	JUN
105899	JUND
105901	KDM1A
106874	KDM4A
107314	KDM5C
107321	LIN9
107296	GCNT2
105815	ST6GALNAC3
106876	MAF
107287	FUT2
105921	MECP2
106877	MEF2B
105938	HS3ST4
105929	MITF
105737	HYAL2
105945	NFIC
105818	B3GALT1
108016	NOTCH1
105951	NR2F1
107333	NRF1
107980	PIGX
106880	POU2F2
106881	PPARA
106884	RARA
108022	RBL1
108024	RELA
105971	RFX1
105972	RFX5
105837	SULT1C4
107337	RLF
108001	SLC35A1
108025	SCML2
107979	SLC35F2
107342	SMAD3
107343	SMARCA4
105808	B3GALT2
107345	SOX2
108013	CHST10
107346	SP2
108029	STAT5B
108030	TBP
107353	TERF2
106022	USF2
107291	PAPSS1
106027	GALNT5
106894	ZBTB10
108027	PIGA
108550	ATF4
107973	AUTS2
106858	GCNT4
108015	B4GALNT3
105812	GALNT12
105930	CHST6
105760	MAN1B1
108564	CEBPZ
108586	SLC35A4
105787	GMPPA
108000	GALNT3
107986	SLC35C2
107976	FUT8
108567	NAGA
108018	CHST14
107989	ST6GALNAC5
108576	EBNA1BP2
108554	ALG9
108551	UGDH
108580	EXT1
108582	EZH2
108600	STS
105913	CHST13
107999	B3GNT6
108003	GCNT3
107289	FUT3
108579	ST3GAL1
108005	SLC17A5
108587	FOXO3
107301	GRHL2
107303	HDAC1
108592	HDAC2
108566	B3GNT4
107998	ST3GAL4
107993	HEYL
108007	CHPF2
105881	GPAA1
105698	ST8SIA6
108004	B3GNT7
108552	GCNT1
108555	DDOST
107316	KLF11
108598	MAFF
105980	ST8SIA2
107983	B3GNT8
108009	MYC
105944	NFATC1
108557	PIGF
107336	PML
108611	RFX2
108613	RING1
108616	SFPQ
108617	SMARCB1
108572	SLC35B2
108032	B3GNT9
108618	SNAPC1
108621	SOX9
108028	SRC
105996	SRF
107290	ASAH1
108585	HEXB
105740	GALNS
107331	B4GALT6
106840	TPST2
108629	UBE2I
107356	VDR
108039	ZBTB2
107975	BARX2
107340	MPI
109689	PIGG
108584	UGP2
109671	ALG2
108568	CSNK2A1
107985	DICER1
108570	DOT1L
108575	E2F8
108589	GMEB2
106865	GPS2
108591	HBP1
106870	HOXB4
108578	PIGL
108605	GALNT9
107312	KAT2B
107320	LDB1
105909	LMO2
108560	GAA
108559	GALE
108038	GMPPB
108588	SLC35C1
108608	PCGF2
108590	GAL3ST3
109684	XYLT2
108614	SATB1
108623	TAF7
108625	TFE3
108628	TRRAP
110787	AEBP2
105693	AR
107273	ASH2L
106869	GALC
107984	CTSA
108561	GALNT6
110789	BTAF1
110804	SGSH
106851	GALT
108612	CHST5
110793	DDIT3
108571	DR1
108556	PMM2
108010	CHST1
106852	ELL2
107288	FUT6
110794	ESRRA
109680	NAGLU
108594	SULT1A3
107991	GLI1
105865	GLI2
109678	GLIS1
110806	GALK2
108593	HDAC6
109679	HEY1
107995	HNF4A
107308	HOXA6
105900	KAT5
106873	KDM1B
107997	KDM4C
108597	KLF15
108006	MAFK
108011	CHST8
109685	NR1H2
108017	NR2F2
105961	PPARG
108021	PRDM4
108610	RBCK1
108034	B3GALT5
108615	SFMBT1
106886	SMAD2
105988	SMARCC2
109686	SNAI2
110812	SND1
105992	SOX17
107348	STAT6
108558	PIGC
108622	SUPT5H
108624	TAL1
108031	TCF21
107996	HS6ST1
108035	TEAD4
108626	THAP1
108548	ARNT2
111091	ATF5
111092	BCL3
111093	CAMTA2
109670	C1GALT1
111095	CREB3L2
105788	CREB3L4
111096	CTBP2
105910	HS3ST1
105939	CHST9
111097	EMX1
110795	GTF3C1
111101	HES1
108595	HIRA
107994	HNF1B
107974	GALNT11
111104	HOXC9
111106	KLF10
108601	MLLT1
110801	MNT
108603	NCOR1
107330	NFYB
110807	NR1H3
111110	POU5F1
110809	PPARGC1A
108620	SOX4
106842	UGT8
111099	A4GNT
111090	PIGV
111113	TBL1X
109690	TEAD2
106015	TERF1
108606	B3GAT2
109691	TGIF1
107970	ARID3A
112214	ARNTL
108553	BACH2
111105	ARSA
106841	BCL11A
109673	SMPD1
108563	CEBPD
110791	CEBPG
108569	DAXX
106839	ST6GALNAC4
105836	UST
105849	FOS
111100	GATA2
111115	B3GALNT1
109677	GATA3
112223	B3GNT3
112222	HOXA2
109675	GLB1
105898	JUNB
109669	UXS1
112224	L3MBTL2
110799	MAFG
107325	MEF2D
108602	NCAPG
111112	SLC35E4
110808	PIAS4
108609	POLR3D
110810	PSIP1
105977	RORA
108014	MGAT5B
110813	SP4
106888	SPIB
111114	TBL1XR1
110815	TOP2B
108627	TP53
111116	TTF1
109692	WRNIP1
108037	XBP1
108020	PIGB
108549	ASCL1
109682	ST8SIA5
109674	HS3ST2
108565	CHD5
112217	CHD7
108574	GUSB
112218	DDX5
105828	ELL
113217	NEU4
112220	GLIS3
112221	HEXIM1
111102	HMGN3
105940	SLC35F3
108033	HS3ST3A1
113216	B3GAT1
107981	LAMP1
109683	MXD1
108604	NEUROD2
108607	PAX6
105817	HPSE2
113233	RBPJ
112227	B4GALT4
113219	GMDS
108619	SOX11
113234	TFAM
107355	TFCP2
110814	TOP1
113235	USP49
109688	UGT1A3
114936	SULT1B1
112230	ARSD
112219	ESR1
113218	FOXP1
113227	LEO1
105952	NR5A2
113231	PBX3
113232	PCGF6
108019	PDX1
113220	HYAL3
116603	GAL3ST1
114952	CTNS
109681	LMNB1
110805	NR0B2
112231	SUMO1
108581	ETV4
116606	FOXA2
116604	SULT1C2
108583	CHPF
116995	NKX2-1
111109	NR4A1
112226	UGT1A6
109687	UGT1A9
109676	UGT1A7
116602	UGT1A1
114944	AGA
108573	E2F2
108596	HOXA1
108599	MBD4
113229	NFE2
117555	SULT1A2
107283	GAL3ST2
110788	BCOR
113214	PPBP
107354	TFAP2C
112215	BHLHE40
114930	HS6ST3
107982	CDX2
114947	GALNT13
116605	SLC35D2
114937	GLI3
117857	HJURP
108012	ST8SIA3
116608	LMNA
114943	LMTK3
113221	CHST4
114946	NR1D1
117859	NR2F6
114933	SLC35F4
114948	POLR3GL
116610	TBX3
108036	TFDP1
111094	CD59
118328	CDK7
108577	EPAS1
110798	LARP7
118335	MANBA
110811	SNAPC5
112225	ST6GALNAC2
113210	ALKBH3
111098	ETS2
118332	HOXA13
118334	ISL1
110800	MLLT3
114934	NDST4
108630	WWTR1
113212	PIGP
112216	HEXA
120755	DYRK1A
118329	ETV7
120757	GMEB1
111108	MXI1
113215	GALNT14
118340	TFAP2A
107988	FOXD2
118331	HNF4G
118333	HOXA4
113228	MYB
113230	PAX5
118043	POU2F1
108562	CCNT2
107280	HS3ST6
116607	GATA4
114938	GRHL3
114939	HDAC8
123043	HMGN1
114940	ID3
110803	NME2
118336	OVOL2
112228	PALB2
116601	PGM1
118045	TET3
111117	YBX1
113211	ARNT
118337	RARG
118338	RXRG
118044	SUZ12
114932	NDST3
123850	DLX4
118330	FOXQ1
113224	ING5
117858	NCAPG2
111111	PRAME
112229	RAG1
114949	SAP30
114953	TLE3
126103	CREM
112232	TCFL5
126100	BCLAF1
110797	HOXA7
114931	HS3ST5
123853	PITX1
105814	EGR1
109672	NEU2
110790	CARM1
110792	DBP
110796	HOXA10
110802	NKX6-1
111103	HOXC6
111107	MSC
113213	EOMES
113222	HOXA9
113223	ING2
113225	FUT5
113226	KLF1
114935	CTCF
114941	LHX2
114942	ARSF
114945	NKX2-2
114950	SOX3
114951	SREBF1
116599	UGT1A4
116600	UGT1A5
116609	TAT
117553	DLX6
117554	UGT2A1
118339	STAG1
120174	FEV
120175	MTA3
120176	PROX1
120177	SF1
120178	FUT9
120754	DLX1
120756	SLC35D3
122677	GREB1
122678	POLR3G
123042	GALNT8
123849	CBX2
123851	FOXH1
123852	NKX2-5
123854	PRDM14
123855	TOX4
126101	LCT
126102	CHD3
126104	HS6ST2
126105	HIST1H1B
126106	NFATC3
126107	NFIB
126108	PBX2
126109	SOX15
126110	TP73
128158	CBX5
128585	HOXB6
160033	CENPA
