# Supplementary material for: A systems-based framework to computationally describe putative transcription factors and signaling pathways regulating glycan biosynthesis
Source: publisher site journal article supplement (doi:10.3762/bjoc.17.119), 2021-07-22
Supplement: Additional file 2 [file 1860-5397-17-119-S2.cys › CytoscapeSession-2021_03_21-12_01/tables/105674-Luminal+Breast/LOCAL_ATTRS-org.cytoscape.model.CyEdge-Luminal+Breast+default+edge.cytable]

CyCSV-Version	1
SUID	interaction	name	selected
java.lang.Long	java.lang.String	java.lang.String	java.lang.Boolean
Luminal Breast default edge
106033	interacts with	ADNP (interacts with) FUT7	false
106034	interacts with	AFF4 (interacts with) MAN1A2	false
106035	interacts with	AFF4 (interacts with) STT3B	false
106036	interacts with	AFF4 (interacts with) NEU3	false
106037	interacts with	AFF4 (interacts with) FUT11	false
106038	interacts with	AFF4 (interacts with) ACER2	false
106039	interacts with	AFF4 (interacts with) COG5	false
106040	interacts with	AR (interacts with) MAN2A1	false
106041	interacts with	AR (interacts with) ACER2	false
106042	interacts with	AR (interacts with) FUT11	false
106043	interacts with	AR (interacts with) SLC35A3	false
106044	interacts with	AR (interacts with) NEU3	false
106045	interacts with	AR (interacts with) SLC35F5	false
106046	interacts with	AR (interacts with) GALNT10	false
106047	interacts with	AR (interacts with) ST8SIA6	false
106048	interacts with	ARID2 (interacts with) RTF1	false
106049	interacts with	ATF1 (interacts with) SLC35A5	false
106050	interacts with	ATF1 (interacts with) SLC35A3	false
106051	interacts with	ATF1 (interacts with) SLC35F5	false
106052	interacts with	ATF1 (interacts with) MAN2A1	false
106053	interacts with	ATF1 (interacts with) GALNT4	false
106054	interacts with	ATF2 (interacts with) MAN1A2	false
106055	interacts with	ATF2 (interacts with) MAN2A1	false
106056	interacts with	ATF2 (interacts with) FUT11	false
106057	interacts with	ATF2 (interacts with) SLC35F5	false
106058	interacts with	ATF2 (interacts with) UGGT1	false
106059	interacts with	ATF3 (interacts with) B3GNT5	false
106060	interacts with	ATF3 (interacts with) HAS1	false
106061	interacts with	ATF3 (interacts with) HAS2	false
106062	interacts with	ATF7IP (interacts with) ALG10	false
106063	interacts with	ATRX (interacts with) FKTN	false
106064	interacts with	BACH1 (interacts with) CSGALNACT2	false
106065	interacts with	BACH1 (interacts with) MAN1A2	false
106066	interacts with	BACH1 (interacts with) FUT11	false
106067	interacts with	BACH1 (interacts with) MAN1A1	false
106068	interacts with	BACH1 (interacts with) CHSY1	false
106069	interacts with	BACH1 (interacts with) B3GNT5	false
106070	interacts with	BACH1 (interacts with) CHST11	false
106071	interacts with	BACH1 (interacts with) GFPT2	false
106072	interacts with	BACH1 (interacts with) ST6GAL2	false
106073	interacts with	BATF (interacts with) DPM3	false
106074	interacts with	BATF3 (interacts with) MGAT1	false
106075	interacts with	BATF3 (interacts with) CHST11	false
106076	interacts with	BATF3 (interacts with) B3GNT5	false
106077	interacts with	BATF3 (interacts with) HAS1	false
106078	interacts with	BCAT1 (interacts with) B3GNT5	false
106079	interacts with	BMI1 (interacts with) ALG10B	false
106080	interacts with	BMI1 (interacts with) GALNT4	false
106081	interacts with	BRCA1 (interacts with) PIGW	false
106082	interacts with	BRCA1 (interacts with) ALG10	false
106083	interacts with	BRCA1 (interacts with) PIGN	false
106084	interacts with	BRCA1 (interacts with) FAM20B	false
106085	interacts with	BRCA1 (interacts with) SLC35E3	false
106086	interacts with	BRD1 (interacts with) ALG12	false
106087	interacts with	BRD1 (interacts with) PMM1	false
106088	interacts with	C17orf49 (interacts with) HYAL2	false
106089	interacts with	CASP8AP2 (interacts with) ALG10B	false
106090	interacts with	CASP8AP2 (interacts with) ALG10	false
106091	interacts with	CASP8AP2 (interacts with) SLC35A5	false
106092	interacts with	CBFB (interacts with) GALNS	false
106093	interacts with	CBX3 (interacts with) CMAS	false
106094	interacts with	CBX4 (interacts with) RFNG	false
106095	interacts with	CBX7 (interacts with) ST6GALNAC6	false
106096	interacts with	CBX7 (interacts with) ST3GAL3	false
106097	interacts with	CBX7 (interacts with) MAN2A2	false
106098	interacts with	CBX7 (interacts with) IDUA	false
106099	interacts with	CBX7 (interacts with) MGAT3	false
106100	interacts with	CBX7 (interacts with) HYAL1	false
106101	interacts with	CBX8 (interacts with) RFNG	false
106102	interacts with	CBX8 (interacts with) GALK1	false
106103	interacts with	CBX8 (interacts with) B3GAT3	false
106104	interacts with	CCDC101 (interacts with) B3GAT3	false
106105	interacts with	CDK8 (interacts with) STT3B	false
106106	interacts with	CDK8 (interacts with) UGGT1	false
106107	interacts with	CDK9 (interacts with) DPM2	false
106108	interacts with	CDK9 (interacts with) PIGQ	false
106109	interacts with	CDK9 (interacts with) MAN1B1	false
106110	interacts with	CDK9 (interacts with) RFNG	false
106111	interacts with	CDK9 (interacts with) DPM3	false
106112	interacts with	CDK9 (interacts with) ST6GALNAC6	false
106113	interacts with	CDK9 (interacts with) POMT1	false
106114	interacts with	CDK9 (interacts with) MOGS	false
106115	interacts with	CDK9 (interacts with) CHST12	false
106116	interacts with	CDK9 (interacts with) IDUA	false
106117	interacts with	CEBPA (interacts with) MGAT1	false
106118	interacts with	CEBPA (interacts with) NAGK	false
106119	interacts with	CEBPA (interacts with) MFNG	false
106120	interacts with	CEBPA (interacts with) FUT7	false
106121	interacts with	CEBPB (interacts with) CHST12	false
106122	interacts with	CEBPB (interacts with) A4GALT	false
106123	interacts with	CHD1 (interacts with) SLC35A3	false
106124	interacts with	CHD1 (interacts with) ACER2	false
106125	interacts with	CHD1 (interacts with) ALG10	false
106126	interacts with	CHD2 (interacts with) OGT	false
106127	interacts with	CHD2 (interacts with) NDST2	false
106128	interacts with	CHD4 (interacts with) NEU3	false
106129	interacts with	CHD8 (interacts with) NEU3	false
106130	interacts with	CHD8 (interacts with) STT3B	false
106131	interacts with	CHD8 (interacts with) FUT11	false
106132	interacts with	CHD8 (interacts with) ALG10	false
106133	interacts with	CHD8 (interacts with) ACER2	false
106134	interacts with	CHD8 (interacts with) FKTN	false
106135	interacts with	CIITA (interacts with) FUT7	false
106136	interacts with	CIITA (interacts with) LAMP3	false
106137	interacts with	CIITA (interacts with) MAN2B1	false
106138	interacts with	CIITA (interacts with) GAL3ST4	false
106139	interacts with	CIITA (interacts with) DSE	false
106140	interacts with	CPSF3L (interacts with) B3GALT6	false
106141	interacts with	CPSF3L (interacts with) RFNG	false
106142	interacts with	CPSF3L (interacts with) PIGQ	false
106143	interacts with	CPSF3L (interacts with) B3GAT3	false
106144	interacts with	CPSF3L (interacts with) MOGS	false
106145	interacts with	CPSF3L (interacts with) B4GALT7	false
106146	interacts with	CPSF3L (interacts with) POMGNT1	false
106147	interacts with	CPSF3L (interacts with) ST3GAL3	false
106148	interacts with	CPSF3L (interacts with) PMM1	false
106149	interacts with	CPSF3L (interacts with) B4GALNT4	false
106150	interacts with	CREB1 (interacts with) FUT11	false
106151	interacts with	CREB3 (interacts with) GMPPA	false
106152	interacts with	CREB3L4 (interacts with) B4GALT3	false
106153	interacts with	CREBBP (interacts with) MAN1A2	false
106154	interacts with	CREBBP (interacts with) NEU3	false
106155	interacts with	CREBBP (interacts with) ACER2	false
106156	interacts with	CREBBP (interacts with) COG7	false
106157	interacts with	CREBBP (interacts with) POFUT1	false
106158	interacts with	CTBP1 (interacts with) B3GAT3	false
106159	interacts with	CTBP1 (interacts with) DPM3	false
106160	interacts with	CTBP1 (interacts with) CHST12	false
106161	interacts with	CTBP1 (interacts with) B4GALT7	false
106162	interacts with	CTBP1 (interacts with) MOGS	false
106163	interacts with	CTNNB1 (interacts with) STT3B	false
106164	interacts with	CTNNB1 (interacts with) MAN2A1	false
106165	interacts with	CTNNB1 (interacts with) CHSY1	false
106166	interacts with	DEK (interacts with) ALG10	false
106167	interacts with	E2F1 (interacts with) PIGW	false
106168	interacts with	E2F1 (interacts with) ALG3	false
106169	interacts with	E2F1 (interacts with) SLC35B1	false
106170	interacts with	E2F1 (interacts with) DPM1	false
106171	interacts with	E2F1 (interacts with) KHK	false
106172	interacts with	E2F6 (interacts with) FUT1	false
106173	interacts with	E2F7 (interacts with) PIGW	false
106174	interacts with	EBF1 (interacts with) CSGALNACT1	false
106175	interacts with	EBF1 (interacts with) ST3GAL2	false
106176	interacts with	EBF1 (interacts with) HAS2	false
106177	interacts with	EBF1 (interacts with) CHST3	false
106178	interacts with	EBF1 (interacts with) HYAL1	false
106179	interacts with	EBF1 (interacts with) B3GALT2	false
106180	interacts with	EBF1 (interacts with) HAS1	false
106181	interacts with	EBF1 (interacts with) TPST1	false
106182	interacts with	EBF1 (interacts with) FUT4	false
106183	interacts with	EBF1 (interacts with) ST3GAL6	false
106184	interacts with	EBF1 (interacts with) GALNT12	false
106185	interacts with	EGLN2 (interacts with) B3GAT3	false
106186	interacts with	EGLN2 (interacts with) MOGS	false
106187	interacts with	EGR1 (interacts with) B3GNT5	false
106188	interacts with	EGR1 (interacts with) CHST3	false
106189	interacts with	EGR1 (interacts with) HAS2	false
106190	interacts with	EGR1 (interacts with) CSGALNACT1	false
106191	interacts with	EGR1 (interacts with) ST6GALNAC3	false
106192	interacts with	EGR1 (interacts with) GFPT2	false
106193	interacts with	EGR2 (interacts with) GFPT2	false
106194	interacts with	EGR2 (interacts with) TPST1	false
106195	interacts with	EGR2 (interacts with) CSGALNACT1	false
106196	interacts with	EGR2 (interacts with) MGAT3	false
106197	interacts with	EGR2 (interacts with) B3GNT5	false
106198	interacts with	EGR2 (interacts with) HPSE2	false
106199	interacts with	EGR2 (interacts with) B3GALT1	false
106200	interacts with	EHF (interacts with) MAN2A1	false
106201	interacts with	EHF (interacts with) UAP1	false
106202	interacts with	EHMT2 (interacts with) MOGS	false
106203	interacts with	ELF1 (interacts with) COG3	false
106204	interacts with	ELF1 (interacts with) COG6	false
106205	interacts with	ELF1 (interacts with) SLC35A5	false
106206	interacts with	ELF1 (interacts with) MAN1A2	false
106207	interacts with	ELF1 (interacts with) UGGT1	false
106208	interacts with	ELF2 (interacts with) ALG10B	false
106209	interacts with	ELK3 (interacts with) FUT11	false
106210	interacts with	ELK4 (interacts with) ALG10	false
106211	interacts with	ELK4 (interacts with) FUT11	false
106212	interacts with	ELK4 (interacts with) UGGT1	false
106213	interacts with	ELK4 (interacts with) ACER2	false
106214	interacts with	ELK4 (interacts with) SLC35A3	false
106215	interacts with	ELK4 (interacts with) SLC35F5	false
106216	interacts with	ELL (interacts with) HYAL2	false
106217	interacts with	EP400 (interacts with) FKTN	false
106218	interacts with	EP400 (interacts with) OGT	false
106219	interacts with	EP400 (interacts with) ACER2	false
106220	interacts with	ERCC6 (interacts with) MAN1A2	false
106221	interacts with	ERCC6 (interacts with) STT3B	false
106222	interacts with	ERCC6 (interacts with) COG5	false
106223	interacts with	ERCC6 (interacts with) ACER2	false
106224	interacts with	ERCC6 (interacts with) MAN2A1	false
106225	interacts with	ERCC6 (interacts with) UGGT1	false
106226	interacts with	ERCC6 (interacts with) SLC35F5	false
106227	interacts with	ERCC6 (interacts with) SLC35A3	false
106228	interacts with	ERCC6 (interacts with) SLC35A5	false
106229	interacts with	ERCC6 (interacts with) RTF1	false
106230	interacts with	ERCC6 (interacts with) FUT11	false
106231	interacts with	ERF (interacts with) PIGQ	false
106232	interacts with	ERF (interacts with) CHST12	false
106233	interacts with	ERF (interacts with) RFNG	false
106234	interacts with	ERF (interacts with) B4GALT7	false
106235	interacts with	ERF (interacts with) HYAL2	false
106236	interacts with	ERG (interacts with) MFNG	false
106237	interacts with	ERG (interacts with) CHSY3	false
106238	interacts with	ERG (interacts with) ST6GALNAC3	false
106239	interacts with	ERG (interacts with) ST8SIA4	false
106240	interacts with	ERG (interacts with) CSGALNACT1	false
106241	interacts with	ERG (interacts with) CHST7	false
106242	interacts with	ERG (interacts with) CHST3	false
106243	interacts with	ERG (interacts with) B3GALT2	false
106244	interacts with	ERG (interacts with) ST3GAL6	false
106245	interacts with	ERG (interacts with) UST	false
106246	interacts with	ERG (interacts with) SULT1C4	false
106247	interacts with	ERG (interacts with) FUT4	false
106248	interacts with	ERG (interacts with) CHST2	false
106249	interacts with	ERG (interacts with) GALNT12	false
106250	interacts with	ERG (interacts with) GFPT2	false
106251	interacts with	ERG (interacts with) HAS2	false
106252	interacts with	ERG (interacts with) TPST1	false
106253	interacts with	ETS1 (interacts with) CHST11	false
106254	interacts with	ETS1 (interacts with) MFNG	false
106255	interacts with	ETS1 (interacts with) ST8SIA4	false
106256	interacts with	ETS1 (interacts with) ST6GALNAC3	false
106257	interacts with	ETS1 (interacts with) GFPT2	false
106258	interacts with	ETS1 (interacts with) CSGALNACT1	false
106259	interacts with	ETS1 (interacts with) ST8SIA1	false
106260	interacts with	ETS1 (interacts with) HS3ST3B1	false
106261	interacts with	ETS1 (interacts with) CHST3	false
106262	interacts with	ETS1 (interacts with) FUT4	false
106263	interacts with	ETS1 (interacts with) CHST2	false
106264	interacts with	ETS1 (interacts with) B3GNT5	false
106265	interacts with	ETS1 (interacts with) B3GALT2	false
106266	interacts with	ETS1 (interacts with) GALNT12	false
106267	interacts with	ETS1 (interacts with) HYAL1	false
106268	interacts with	ETS1 (interacts with) ST3GAL6	false
106269	interacts with	ETV1 (interacts with) ARSB	false
106270	interacts with	ETV1 (interacts with) EXTL2	false
106271	interacts with	ETV1 (interacts with) CSGALNACT2	false
106272	interacts with	ETV1 (interacts with) ST3GAL6	false
106273	interacts with	ETV1 (interacts with) CHST3	false
106274	interacts with	ETV1 (interacts with) TPST1	false
106275	interacts with	ETV1 (interacts with) SLC35B4	false
106276	interacts with	ETV1 (interacts with) GAL3ST4	false
106277	interacts with	EZH1 (interacts with) OGT	false
106278	interacts with	EZH1 (interacts with) NDST2	false
106279	interacts with	FANCD2 (interacts with) PIGW	false
106280	interacts with	FLI1 (interacts with) MFNG	false
106281	interacts with	FLI1 (interacts with) ST8SIA4	false
106282	interacts with	FLI1 (interacts with) ST3GAL2	false
106283	interacts with	FLI1 (interacts with) FUT7	false
106284	interacts with	FLI1 (interacts with) CHST11	false
106285	interacts with	FLI1 (interacts with) ST8SIA1	false
106286	interacts with	FLI1 (interacts with) CSGALNACT1	false
106287	interacts with	FLI1 (interacts with) ST6GALNAC3	false
106288	interacts with	FLI1 (interacts with) HS3ST3B1	false
106289	interacts with	FLI1 (interacts with) LAMP3	false
106290	interacts with	FLI1 (interacts with) CHST2	false
106291	interacts with	FLI1 (interacts with) ST3GAL6	false
106292	interacts with	FLI1 (interacts with) B3GNT5	false
106293	interacts with	FOS (interacts with) B3GNT5	false
106294	interacts with	FOXA1 (interacts with) GLCE	false
106295	interacts with	FOXA1 (interacts with) PIGH	false
106296	interacts with	FOXM1 (interacts with) SLC35B1	false
106297	interacts with	FOXM1 (interacts with) PIGW	false
106298	interacts with	FOXM1 (interacts with) RPN2	false
106299	interacts with	FOXM1 (interacts with) GNPNAT1	false
106300	interacts with	FOXM1 (interacts with) ALG3	false
106301	interacts with	FOXO1 (interacts with) CSGALNACT2	false
106302	interacts with	FOXO1 (interacts with) DSE	false
106303	interacts with	FOXO1 (interacts with) CSGALNACT1	false
106304	interacts with	FOXO1 (interacts with) ST6GALNAC3	false
106305	interacts with	FOXO1 (interacts with) CHST3	false
106306	interacts with	FOXO1 (interacts with) GFPT2	false
106307	interacts with	FOXO1 (interacts with) DSEL	false
106308	interacts with	FOXO1 (interacts with) ST3GAL2	false
106309	interacts with	FOXO1 (interacts with) UST	false
106310	interacts with	FOXO1 (interacts with) CHST2	false
106311	interacts with	FOXO1 (interacts with) FUT4	false
106312	interacts with	FOXP3 (interacts with) FUT7	false
106313	interacts with	FOXP3 (interacts with) ST8SIA4	false
106314	interacts with	FOXP3 (interacts with) HK3	false
106315	interacts with	FOXP3 (interacts with) CHST11	false
106316	interacts with	FOXP3 (interacts with) MFNG	false
106317	interacts with	FOXP3 (interacts with) ST8SIA1	false
106318	interacts with	FOXP3 (interacts with) GAL3ST4	false
106319	interacts with	FOXP3 (interacts with) NPL	false
106320	interacts with	FOXP3 (interacts with) MGAT1	false
106321	interacts with	GABPA (interacts with) SLC35A5	false
106322	interacts with	GABPA (interacts with) ALG10B	false
106323	interacts with	GABPA (interacts with) SLC35A3	false
106324	interacts with	GABPA (interacts with) FUT11	false
106325	interacts with	GATA6 (interacts with) MFNG	false
106326	interacts with	GATAD1 (interacts with) ALG13	false
106327	interacts with	GATAD1 (interacts with) COG7	false
106328	interacts with	GLI2 (interacts with) ST3GAL2	false
106329	interacts with	GLYR1 (interacts with) COG7	false
106330	interacts with	GLYR1 (interacts with) ALG1	false
106331	interacts with	GTF2B (interacts with) CTBS	false
106332	interacts with	GTF2F1 (interacts with) RFNG	false
106333	interacts with	GTF2F1 (interacts with) B3GAT3	false
106334	interacts with	GTF2F1 (interacts with) MOGS	false
106335	interacts with	GTF2F1 (interacts with) DPM3	false
106336	interacts with	GTF2F1 (interacts with) IDUA	false
106337	interacts with	GTF2F1 (interacts with) GALK1	false
106338	interacts with	GTF2I (interacts with) COG5	false
106339	interacts with	GTF2I (interacts with) SLC35A3	false
106340	interacts with	GTF2I (interacts with) ALG10B	false
106341	interacts with	GTF2I (interacts with) POFUT1	false
106342	interacts with	H2AFX (interacts with) DPM2	false
106343	interacts with	H2AFX (interacts with) B3GAT3	false
106344	interacts with	HCFC1 (interacts with) NEU3	false
106345	interacts with	HCFC1 (interacts with) PIGO	false
106346	interacts with	HCFC1 (interacts with) NDST2	false
106347	interacts with	HECTD1 (interacts with) FUT11	false
106348	interacts with	HES4 (interacts with) GALK1	false
106349	interacts with	HES4 (interacts with) MOGS	false
106350	interacts with	HINFP (interacts with) DPAGT1	false
106351	interacts with	HSF1 (interacts with) TSTA3	false
106352	interacts with	HSF1 (interacts with) GPAA1	false
106353	interacts with	HSF1 (interacts with) RFNG	false
106354	interacts with	HSF1 (interacts with) B3GAT3	false
106355	interacts with	HSF1 (interacts with) GALK1	false
106356	interacts with	IKZF1 (interacts with) MFNG	false
106357	interacts with	IKZF1 (interacts with) ST8SIA4	false
106358	interacts with	IKZF1 (interacts with) LAMP3	false
106359	interacts with	IKZF1 (interacts with) MAN2B1	false
106360	interacts with	IKZF1 (interacts with) GM2A	false
106361	interacts with	IKZF1 (interacts with) FUT7	false
106362	interacts with	IKZF1 (interacts with) LIPA	false
106363	interacts with	IKZF1 (interacts with) DSE	false
106364	interacts with	IKZF1 (interacts with) NPL	false
106365	interacts with	INO80 (interacts with) RTF1	false
106366	interacts with	INTS3 (interacts with) B4GALT3	false
106367	interacts with	IRF1 (interacts with) LAMP3	false
106368	interacts with	IRF4 (interacts with) MFNG	false
106369	interacts with	IRF4 (interacts with) FUT7	false
106370	interacts with	IRF4 (interacts with) ST8SIA4	false
106371	interacts with	IRF4 (interacts with) ST8SIA1	false
106372	interacts with	IRF4 (interacts with) LAMP3	false
106373	interacts with	IRF4 (interacts with) CHST11	false
106374	interacts with	IRF4 (interacts with) CHST2	false
106375	interacts with	IRF4 (interacts with) FUT4	false
106376	interacts with	IRF5 (interacts with) HK3	false
106377	interacts with	IRF5 (interacts with) FUT7	false
106378	interacts with	IRF8 (interacts with) HK3	false
106379	interacts with	IRF8 (interacts with) ST8SIA4	false
106380	interacts with	IRF8 (interacts with) LIPA	false
106381	interacts with	IRF8 (interacts with) GM2A	false
106382	interacts with	IRF8 (interacts with) DSE	false
106383	interacts with	JDP2 (interacts with) MGAT1	false
106384	interacts with	JMJD1C (interacts with) FUT11	false
106385	interacts with	JMJD1C (interacts with) CSGALNACT2	false
106386	interacts with	JMJD1C (interacts with) NDST2	false
106387	interacts with	JMJD1C (interacts with) MGAT5	false
106388	interacts with	JMJD1C (interacts with) CHSY1	false
106389	interacts with	JMJD6 (interacts with) GALK1	false
106390	interacts with	JMJD6 (interacts with) SLC35B1	false
106391	interacts with	JUN (interacts with) FKRP	false
106392	interacts with	JUN (interacts with) HYAL2	false
106393	interacts with	JUN (interacts with) HAS1	false
106394	interacts with	JUN (interacts with) GBGT1	false
106395	interacts with	JUN (interacts with) MFNG	false
106396	interacts with	JUNB (interacts with) HAS1	false
106397	interacts with	JUNB (interacts with) CHST12	false
106398	interacts with	JUNB (interacts with) ST3GAL2	false
106399	interacts with	JUNB (interacts with) HYAL2	false
106400	interacts with	JUNB (interacts with) MFNG	false
106401	interacts with	JUNB (interacts with) FKRP	false
106402	interacts with	JUNB (interacts with) CHST2	false
106403	interacts with	JUNB (interacts with) GBGT1	false
106404	interacts with	JUNB (interacts with) HYAL1	false
106405	interacts with	JUND (interacts with) DPM3	false
106406	interacts with	JUND (interacts with) RFNG	false
106407	interacts with	JUND (interacts with) B3GAT3	false
106408	interacts with	JUND (interacts with) CHST12	false
106409	interacts with	JUND (interacts with) IDUA	false
106410	interacts with	JUND (interacts with) HYAL2	false
106411	interacts with	KAT5 (interacts with) B3GAT3	false
106412	interacts with	KDM1A (interacts with) GNB1	false
106413	interacts with	KDM3A (interacts with) FKTN	false
106414	interacts with	KDM5A (interacts with) ALG10	false
106415	interacts with	KDM5A (interacts with) NEU3	false
106416	interacts with	KDM5A (interacts with) ALG10B	false
106417	interacts with	KDM5A (interacts with) MAN2A1	false
106418	interacts with	KDM5A (interacts with) UGGT1	false
106419	interacts with	KDM5A (interacts with) SLC35A3	false
106420	interacts with	KDM5A (interacts with) FUT11	false
106421	interacts with	KDM5A (interacts with) COG5	false
106422	interacts with	KDM5A (interacts with) SLC35F5	false
106423	interacts with	KDM5A (interacts with) GNS	false
106424	interacts with	KDM5A (interacts with) PIGN	false
106425	interacts with	KDM5A (interacts with) SLC35A5	false
106426	interacts with	KDM5A (interacts with) HS2ST1	false
106427	interacts with	KDM5B (interacts with) MAN1A2	false
106428	interacts with	KDM5B (interacts with) UGGT1	false
106429	interacts with	KDM5B (interacts with) FAM20B	false
106430	interacts with	KDM5B (interacts with) B3GALNT2	false
106431	interacts with	KDM5B (interacts with) FKTN	false
106432	interacts with	LMO2 (interacts with) MFNG	false
106433	interacts with	LMO2 (interacts with) ST8SIA4	false
106434	interacts with	LMO2 (interacts with) ST6GALNAC3	false
106435	interacts with	LMO2 (interacts with) HYAL2	false
106436	interacts with	LMO2 (interacts with) CSGALNACT1	false
106437	interacts with	LMO2 (interacts with) HYAL1	false
106438	interacts with	LMO2 (interacts with) MGAT1	false
106439	interacts with	LMO2 (interacts with) ST3GAL2	false
106440	interacts with	LMO2 (interacts with) GBGT1	false
106441	interacts with	LMO2 (interacts with) HS3ST1	false
106442	interacts with	LMO2 (interacts with) CHST2	false
106443	interacts with	LMO2 (interacts with) ST6GALNAC6	false
106444	interacts with	LYL1 (interacts with) MFNG	false
106445	interacts with	LYL1 (interacts with) FUT7	false
106446	interacts with	LYL1 (interacts with) MAN2B1	false
106447	interacts with	LYL1 (interacts with) MGAT1	false
106448	interacts with	LYL1 (interacts with) RENBP	false
106449	interacts with	LYL1 (interacts with) CHST12	false
106450	interacts with	LYL1 (interacts with) ST6GALNAC6	false
106451	interacts with	LYL1 (interacts with) ST3GAL2	false
106452	interacts with	LYL1 (interacts with) IDUA	false
106453	interacts with	LYL1 (interacts with) GBGT1	false
106454	interacts with	LYL1 (interacts with) HYAL2	false
106455	interacts with	LYL1 (interacts with) CHST13	false
106456	interacts with	LYL1 (interacts with) HYAL1	false
106457	interacts with	LYL1 (interacts with) FKRP	false
106458	interacts with	LYL1 (interacts with) CHST2	false
106459	interacts with	MAFB (interacts with) DSE	false
106460	interacts with	MAFB (interacts with) B3GNT5	false
106461	interacts with	MAX (interacts with) PIGH	false
106462	interacts with	MAZ (interacts with) PIGQ	false
106463	interacts with	MAZ (interacts with) B4GALT2	false
106464	interacts with	MAZ (interacts with) DPM2	false
106465	interacts with	MAZ (interacts with) B3GALT6	false
106466	interacts with	MAZ (interacts with) B3GAT3	false
106467	interacts with	MAZ (interacts with) RFNG	false
106468	interacts with	MAZ (interacts with) B4GALNT4	false
106469	interacts with	MAZ (interacts with) ALG1	false
106470	interacts with	MAZ (interacts with) MGAT4B	false
106471	interacts with	MECOM (interacts with) ST6GALNAC1	false
106472	interacts with	MECOM (interacts with) ST3GAL2	false
106473	interacts with	MECOM (interacts with) GALNT12	false
106474	interacts with	MECP2 (interacts with) IDS	false
106475	interacts with	MECP2 (interacts with) NDST1	false
106476	interacts with	MED1 (interacts with) FUT11	false
106477	interacts with	MED1 (interacts with) PIGW	false
106478	interacts with	MEF2A (interacts with) CSGALNACT2	false
106479	interacts with	MEF2A (interacts with) IDS	false
106480	interacts with	MEF2A (interacts with) DSE	false
106481	interacts with	MEF2A (interacts with) HS2ST1	false
106482	interacts with	MEF2C (interacts with) ST6GALNAC3	false
106483	interacts with	MEF2C (interacts with) ARSB	false
106484	interacts with	MEF2C (interacts with) SLC35F1	false
106485	interacts with	MEF2C (interacts with) CHSY3	false
106486	interacts with	MEF2C (interacts with) ST3GAL2	false
106487	interacts with	MEF2C (interacts with) DSEL	false
106488	interacts with	MEF2C (interacts with) DSE	false
106489	interacts with	MEF2C (interacts with) MFNG	false
106490	interacts with	MEF2C (interacts with) CSGALNACT1	false
106491	interacts with	MEF2C (interacts with) B3GALT2	false
106492	interacts with	MEF2C (interacts with) SLC35B4	false
106493	interacts with	MEF2C (interacts with) CHST11	false
106494	interacts with	MEF2C (interacts with) UST	false
106495	interacts with	MEF2C (interacts with) MGAT3	false
106496	interacts with	MEF2C (interacts with) CHST3	false
106497	interacts with	MEIS1 (interacts with) CHST3	false
106498	interacts with	MEIS1 (interacts with) CSGALNACT1	false
106499	interacts with	MITF (interacts with) GAL3ST4	false
106500	interacts with	MITF (interacts with) ST3GAL6	false
106501	interacts with	MITF (interacts with) CSGALNACT1	false
106502	interacts with	MITF (interacts with) ARSB	false
106503	interacts with	MITF (interacts with) GFPT2	false
106504	interacts with	MITF (interacts with) CHST6	false
106505	interacts with	MITF (interacts with) UST	false
106506	interacts with	MRE11A (interacts with) NEU3	false
106507	interacts with	MSX1 (interacts with) ST3GAL2	false
106508	interacts with	MSX1 (interacts with) A4GALT	false
106509	interacts with	MXD3 (interacts with) MOGS	false
106510	interacts with	MYBL1 (interacts with) PIGW	false
106511	interacts with	MYBL2 (interacts with) RPN2	false
106512	interacts with	MYBL2 (interacts with) RPN1	false
106513	interacts with	MYBL2 (interacts with) ALG3	false
106514	interacts with	MYBL2 (interacts with) DPM1	false
106515	interacts with	MYBL2 (interacts with) SLC35B1	false
106516	interacts with	MYH11 (interacts with) CHST3	false
106517	interacts with	MYH11 (interacts with) HPSE2	false
106518	interacts with	MYH11 (interacts with) ST6GALNAC3	false
106519	interacts with	MYH11 (interacts with) CHST2	false
106520	interacts with	MYH11 (interacts with) CHST7	false
106521	interacts with	MYH11 (interacts with) HS3ST4	false
106522	interacts with	MYH11 (interacts with) CHST9	false
106523	interacts with	MYH11 (interacts with) B3GALT1	false
106524	interacts with	MYH11 (interacts with) SLC35F3	false
106525	interacts with	MYH11 (interacts with) SULT1C4	false
106526	interacts with	MYH11 (interacts with) HAS3	false
106527	interacts with	MZF1 (interacts with) FKRP	false
106528	interacts with	MZF1 (interacts with) MOGS	false
106529	interacts with	MZF1 (interacts with) DPM3	false
106530	interacts with	MZF1 (interacts with) B4GALNT4	false
106531	interacts with	NFAT5 (interacts with) ACER2	false
106532	interacts with	NFATC1 (interacts with) MFNG	false
106533	interacts with	NFIC (interacts with) MGAT5	false
106534	interacts with	NFYC (interacts with) ST3GAL3	false
106535	interacts with	NIPBL (interacts with) NEU3	false
106536	interacts with	NIPBL (interacts with) FUT11	false
106537	interacts with	NPAT (interacts with) FUT11	false
106538	interacts with	NR2C2 (interacts with) STT3B	false
106539	interacts with	NR2C2 (interacts with) FKTN	false
106540	interacts with	NR2C2 (interacts with) OGT	false
106541	interacts with	NR2C2 (interacts with) ALG10B	false
106542	interacts with	NR2C2 (interacts with) FUT11	false
106543	interacts with	NR2C2 (interacts with) FAM20B	false
106544	interacts with	NR2C2 (interacts with) COG3	false
106545	interacts with	NR2C2 (interacts with) SLC35D1	false
106546	interacts with	NR2C2 (interacts with) SLC35B4	false
106547	interacts with	NR2C2 (interacts with) UGGT1	false
106548	interacts with	NR2F1 (interacts with) CHST3	false
106549	interacts with	NR2F1 (interacts with) ST3GAL2	false
106550	interacts with	NR2F1 (interacts with) DSE	false
106551	interacts with	NR5A2 (interacts with) ST6GALNAC3	false
106552	interacts with	NR5A2 (interacts with) ST8SIA4	false
106553	interacts with	NR5A2 (interacts with) CSGALNACT1	false
106554	interacts with	NR5A2 (interacts with) SULT1C4	false
106555	interacts with	NR5A2 (interacts with) B3GNT5	false
106556	interacts with	PBX1 (interacts with) MAN1A2	false
106557	interacts with	PBX1 (interacts with) FAM20B	false
106558	interacts with	PBX1 (interacts with) PIGM	false
106559	interacts with	PBX1 (interacts with) STT3B	false
106560	interacts with	PBX1 (interacts with) UGGT1	false
106561	interacts with	PCGF1 (interacts with) RFNG	false
106562	interacts with	PHF20 (interacts with) POFUT1	false
106563	interacts with	PHF20 (interacts with) SLC35A3	false
106564	interacts with	PHF6 (interacts with) FAM20B	false
106565	interacts with	PHF6 (interacts with) SLC35F5	false
106566	interacts with	PIAS1 (interacts with) MGAT5	false
106567	interacts with	PIAS1 (interacts with) ACER2	false
106568	interacts with	PIAS1 (interacts with) FUT11	false
106569	interacts with	PIAS1 (interacts with) ALG10	false
106570	interacts with	PIAS1 (interacts with) SLC35A3	false
106571	interacts with	PIAS1 (interacts with) FKTN	false
106572	interacts with	PIAS1 (interacts with) COG5	false
106573	interacts with	PIAS1 (interacts with) SLC35A5	false
106574	interacts with	PIAS1 (interacts with) SLC35F5	false
106575	interacts with	POLR2B (interacts with) MAN1A2	false
106576	interacts with	POLR2B (interacts with) MAN2A1	false
106577	interacts with	POLR3A (interacts with) MGAT5	false
106578	interacts with	POLR3A (interacts with) NEU3	false
106579	interacts with	PPARG (interacts with) CHST7	false
106580	interacts with	PPARG (interacts with) ST6GALNAC1	false
106581	interacts with	PPARG (interacts with) MFNG	false
106582	interacts with	PPARG (interacts with) MGAT3	false
106583	interacts with	PPARG (interacts with) B3GNT5	false
106584	interacts with	PPARG (interacts with) CSGALNACT1	false
106585	interacts with	PRDM1 (interacts with) DSE	false
106586	interacts with	PRDM1 (interacts with) CSGALNACT1	false
106587	interacts with	PRDM1 (interacts with) HAS2	false
106588	interacts with	PRDM1 (interacts with) FUT4	false
106589	interacts with	PRDM1 (interacts with) B3GALT2	false
106590	interacts with	PRDM1 (interacts with) B3GNT5	false
106591	interacts with	PRDM1 (interacts with) ST6GAL2	false
106592	interacts with	PRDM1 (interacts with) SLC35B4	false
106593	interacts with	PRDM1 (interacts with) UST	false
106594	interacts with	PRKDC (interacts with) ALG10	false
106595	interacts with	PRKDC (interacts with) FUT11	false
106596	interacts with	PRKDC (interacts with) PIGN	false
106597	interacts with	PRKDC (interacts with) POFUT1	false
106598	interacts with	PRKDC (interacts with) SLC35A3	false
106599	interacts with	PRKDC (interacts with) PIGW	false
106600	interacts with	RAC3 (interacts with) GALK1	false
106601	interacts with	RB1 (interacts with) COG6	false
106602	interacts with	RB1 (interacts with) COG3	false
106603	interacts with	RB1 (interacts with) SLC35A5	false
106604	interacts with	RB1 (interacts with) UGGT2	false
106605	interacts with	RBBP5 (interacts with) MAN1A2	false
106606	interacts with	RBBP5 (interacts with) FAM20B	false
106607	interacts with	RBBP5 (interacts with) COG5	false
106608	interacts with	RBBP5 (interacts with) FUT11	false
106609	interacts with	RBBP5 (interacts with) UGGT1	false
106610	interacts with	RBBP5 (interacts with) SLC35A3	false
106611	interacts with	RBBP5 (interacts with) PIGN	false
106612	interacts with	RBBP5 (interacts with) STT3B	false
106613	interacts with	RBBP5 (interacts with) B3GALNT2	false
106614	interacts with	RBL2 (interacts with) ALG10B	false
106615	interacts with	RBL2 (interacts with) SLC35A5	false
106616	interacts with	RBL2 (interacts with) MAN1A2	false
106617	interacts with	RBL2 (interacts with) GNS	false
106618	interacts with	RCOR1 (interacts with) FKTN	false
106619	interacts with	RCOR1 (interacts with) NEU3	false
106620	interacts with	RCOR1 (interacts with) ACER2	false
106621	interacts with	REST (interacts with) FUT11	false
106622	interacts with	RFX1 (interacts with) MOGS	false
106623	interacts with	RFX1 (interacts with) HYAL2	false
106624	interacts with	RFX5 (interacts with) COG2	false
106625	interacts with	RFX7 (interacts with) NEU3	false
106626	interacts with	RNF2 (interacts with) FPGT	false
106627	interacts with	RNF2 (interacts with) COG2	false
106628	interacts with	RORA (interacts with) DSE	false
106629	interacts with	RUNX1 (interacts with) CHSY1	false
106630	interacts with	RUNX1 (interacts with) CHST3	false
106631	interacts with	RUNX1 (interacts with) CHSY3	false
106632	interacts with	RUNX1 (interacts with) SULF2	false
106633	interacts with	RUNX1 (interacts with) ST8SIA2	false
106634	interacts with	RUNX2 (interacts with) SULF2	false
106635	interacts with	RUNX2 (interacts with) TPST1	false
106636	interacts with	RUNX2 (interacts with) CHST3	false
106637	interacts with	RUNX3 (interacts with) CHST11	false
106638	interacts with	RUNX3 (interacts with) FUT4	false
106639	interacts with	RXRA (interacts with) NDST1	false
106640	interacts with	RXRA (interacts with) POMT1	false
106641	interacts with	RXRA (interacts with) ST6GALNAC6	false
106642	interacts with	SIN3A (interacts with) RTF1	false
106643	interacts with	SIN3A (interacts with) PIGN	false
106644	interacts with	SIN3A (interacts with) MAN1A2	false
106645	interacts with	SIN3A (interacts with) ACER2	false
106646	interacts with	SIN3A (interacts with) UGCG	false
106647	interacts with	SIN3A (interacts with) FKTN	false
106648	interacts with	SIN3A (interacts with) ALG10B	false
106649	interacts with	SIX5 (interacts with) PIGQ	false
106650	interacts with	SIX5 (interacts with) B3GALT6	false
106651	interacts with	SIX5 (interacts with) RFNG	false
106652	interacts with	SIX5 (interacts with) MOGS	false
106653	interacts with	SIX5 (interacts with) B4GALT7	false
106654	interacts with	SIX5 (interacts with) DPM3	false
106655	interacts with	SIX5 (interacts with) HYAL2	false
106656	interacts with	SMAD4 (interacts with) ALG10B	false
106657	interacts with	SMAD4 (interacts with) GLCE	false
106658	interacts with	SMARCC2 (interacts with) OGT	false
106659	interacts with	SMC1A (interacts with) NEU3	false
106660	interacts with	SMC1A (interacts with) STT3B	false
106661	interacts with	SMC1A (interacts with) MAN1A2	false
106662	interacts with	SMC1A (interacts with) UGGT1	false
106663	interacts with	SMC1A (interacts with) PIGW	false
106664	interacts with	SMC3 (interacts with) STT3B	false
106665	interacts with	SMC3 (interacts with) FUT11	false
106666	interacts with	SMC3 (interacts with) FKTN	false
106667	interacts with	SMC3 (interacts with) PIGN	false
106668	interacts with	SMC3 (interacts with) SLC35A5	false
106669	interacts with	SMC3 (interacts with) FAM20B	false
106670	interacts with	SMC3 (interacts with) UGCG	false
106671	interacts with	SMC3 (interacts with) UGGT1	false
106672	interacts with	SOX10 (interacts with) CHST3	false
106673	interacts with	SOX17 (interacts with) HYAL2	false
106674	interacts with	SOX17 (interacts with) ST6GALNAC3	false
106675	interacts with	SOX17 (interacts with) CSGALNACT1	false
106676	interacts with	SOX17 (interacts with) HYAL1	false
106677	interacts with	SOX17 (interacts with) MGAT3	false
106678	interacts with	SOX17 (interacts with) ST6GALNAC1	false
106679	interacts with	SOX17 (interacts with) ST3GAL2	false
106680	interacts with	SOX17 (interacts with) CHST3	false
106681	interacts with	SOX17 (interacts with) GBGT1	false
106682	interacts with	SOX17 (interacts with) CHST12	false
106683	interacts with	SOX17 (interacts with) ST3GAL3	false
106684	interacts with	SPDEF (interacts with) DPM2	false
106685	interacts with	SRCAP (interacts with) COG7	false
106686	interacts with	SREBF2 (interacts with) ALG12	false
106687	interacts with	SRF (interacts with) CHST2	false
106688	interacts with	SRF (interacts with) MGAT3	false
106689	interacts with	SRF (interacts with) HAS1	false
106690	interacts with	SRF (interacts with) MFNG	false
106691	interacts with	SRF (interacts with) HYAL2	false
106692	interacts with	SSRP1 (interacts with) GANAB	false
106693	interacts with	STAT1 (interacts with) LAMP3	false
106694	interacts with	STAT1 (interacts with) ST8SIA4	false
106695	interacts with	STAT1 (interacts with) HPSE	false
106696	interacts with	STAT1 (interacts with) NPL	false
106697	interacts with	STAT2 (interacts with) LAMP3	false
106698	interacts with	STAT2 (interacts with) GAL3ST4	false
106699	interacts with	STAT2 (interacts with) CHST11	false
106700	interacts with	STAT2 (interacts with) HPSE	false
106701	interacts with	STAT4 (interacts with) FUT7	false
106702	interacts with	STAT4 (interacts with) ST8SIA4	false
106703	interacts with	STAT4 (interacts with) MFNG	false
106704	interacts with	STAT4 (interacts with) ST8SIA1	false
106705	interacts with	STAT4 (interacts with) CHST11	false
106706	interacts with	STAT4 (interacts with) CHST2	false
106707	interacts with	STAT5A (interacts with) MFNG	false
106708	interacts with	STAT5A (interacts with) GBGT1	false
106709	interacts with	STAT5A (interacts with) ST6GALNAC6	false
106710	interacts with	STAT5A (interacts with) MGAT3	false
106711	interacts with	STAT5A (interacts with) CHST2	false
106712	interacts with	SUMO2 (interacts with) SLC35B1	false
106713	interacts with	SUMO2 (interacts with) COG1	false
106714	interacts with	TAF1 (interacts with) NEU3	false
106715	interacts with	TAF1 (interacts with) MAN1A2	false
106716	interacts with	TAF1 (interacts with) FUT11	false
106717	interacts with	TAF1 (interacts with) ACER2	false
106718	interacts with	TCF12 (interacts with) FUT11	false
106719	interacts with	TCF12 (interacts with) CSGALNACT2	false
106720	interacts with	TCF7 (interacts with) MFNG	false
106721	interacts with	TCF7 (interacts with) LAMP3	false
106722	interacts with	TCF7 (interacts with) ST8SIA1	false
106723	interacts with	TCF7 (interacts with) FUT4	false
106724	interacts with	TCF7 (interacts with) CHST3	false
106725	interacts with	TCF7L1 (interacts with) TPST1	false
106726	interacts with	TCF7L1 (interacts with) CHST3	false
106727	interacts with	TCF7L1 (interacts with) MFNG	false
106728	interacts with	TCF7L1 (interacts with) ST8SIA1	false
106729	interacts with	TCF7L1 (interacts with) GBGT1	false
106730	interacts with	TCF7L2 (interacts with) CHST3	false
106731	interacts with	TCF7L2 (interacts with) CSGALNACT1	false
106732	interacts with	TCF7L2 (interacts with) ST8SIA1	false
106733	interacts with	TCF7L2 (interacts with) GFPT2	false
106734	interacts with	TCF7L2 (interacts with) ST8SIA2	false
106735	interacts with	TDRD3 (interacts with) COG6	false
106736	interacts with	TDRD3 (interacts with) ALG5	false
106737	interacts with	TEAD1 (interacts with) CSGALNACT2	false
106738	interacts with	TEAD1 (interacts with) FUT11	false
106739	interacts with	TEAD1 (interacts with) EXTL2	false
106740	interacts with	TEAD1 (interacts with) SLC35D1	false
106741	interacts with	TEAD1 (interacts with) DSE	false
106742	interacts with	TEAD1 (interacts with) GALNT1	false
106743	interacts with	TEAD1 (interacts with) DSEL	false
106744	interacts with	TERF1 (interacts with) PIGW	false
106745	interacts with	TET2 (interacts with) MAN1A2	false
106746	interacts with	TET2 (interacts with) STT3B	false
106747	interacts with	TET2 (interacts with) COG5	false
106748	interacts with	TET2 (interacts with) FUT11	false
106749	interacts with	TET2 (interacts with) ACER2	false
106750	interacts with	TET2 (interacts with) SLC35D1	false
106751	interacts with	TET2 (interacts with) SLC35A3	false
106752	interacts with	TET2 (interacts with) CSGALNACT2	false
106753	interacts with	TET2 (interacts with) ALG10	false
106754	interacts with	TP63 (interacts with) HAS3	false
106755	interacts with	TP63 (interacts with) B3GNT5	false
106756	interacts with	TP63 (interacts with) CHST3	false
106757	interacts with	TP63 (interacts with) ST8SIA2	false
106758	interacts with	TRIM28 (interacts with) GPAA1	false
106759	interacts with	TRIM28 (interacts with) B4GALT2	false
106760	interacts with	TRIM28 (interacts with) B4GALT7	false
106761	interacts with	TRIM28 (interacts with) GALK1	false
106762	interacts with	TRIM28 (interacts with) B3GAT3	false
106763	interacts with	TRIM28 (interacts with) B4GALNT4	false
106764	interacts with	TTF2 (interacts with) MAN1A2	false
106765	interacts with	TTF2 (interacts with) PIGW	false
106766	interacts with	UBTF (interacts with) B4GALNT4	false
106767	interacts with	USF1 (interacts with) DPM3	false
106768	interacts with	USF1 (interacts with) B4GALT3	false
106769	interacts with	USF1 (interacts with) IDUA	false
106770	interacts with	USF2 (interacts with) DPM3	false
106771	interacts with	USF2 (interacts with) IDUA	false
106772	interacts with	USF2 (interacts with) B3GALT6	false
106773	interacts with	USF2 (interacts with) RFNG	false
106774	interacts with	USF2 (interacts with) B3GAT3	false
106775	interacts with	USF2 (interacts with) MOGS	false
106776	interacts with	USF2 (interacts with) B4GALNT4	false
106777	interacts with	VEZF1 (interacts with) ALG10B	false
106778	interacts with	VEZF1 (interacts with) ALG10	false
106779	interacts with	VEZF1 (interacts with) UGCG	false
106780	interacts with	VEZF1 (interacts with) FKTN	false
106781	interacts with	VEZF1 (interacts with) GNS	false
106782	interacts with	VEZF1 (interacts with) PIGN	false
106783	interacts with	VEZF1 (interacts with) SLC35E3	false
106784	interacts with	VEZF1 (interacts with) FPGT	false
106785	interacts with	WDR5 (interacts with) DPM2	false
106786	interacts with	WDR5 (interacts with) POMT1	false
106787	interacts with	WDR5 (interacts with) MAN1B1	false
106788	interacts with	XRN2 (interacts with) STT3B	false
106789	interacts with	XRN2 (interacts with) MAN2A1	false
106790	interacts with	XRN2 (interacts with) MAN1A2	false
106791	interacts with	XRN2 (interacts with) NEU3	false
106792	interacts with	XRN2 (interacts with) UGGT1	false
106793	interacts with	XRN2 (interacts with) POFUT1	false
106794	interacts with	XRN2 (interacts with) SLC35A3	false
106795	interacts with	YAP1 (interacts with) GALNT10	false
106796	interacts with	YAP1 (interacts with) B3GNT5	false
106797	interacts with	YAP1 (interacts with) DSE	false
106798	interacts with	YAP1 (interacts with) CHSY1	false
106799	interacts with	YAP1 (interacts with) CHST3	false
106800	interacts with	YAP1 (interacts with) CSGALNACT1	false
106801	interacts with	YAP1 (interacts with) GALNT5	false
106802	interacts with	YY1 (interacts with) GNPNAT1	false
106803	interacts with	ZBTB17 (interacts with) RFNG	false
106804	interacts with	ZBTB17 (interacts with) B3GALT6	false
106805	interacts with	ZBTB17 (interacts with) PIGQ	false
106806	interacts with	ZBTB17 (interacts with) B3GAT3	false
106807	interacts with	ZBTB17 (interacts with) DPM3	false
106808	interacts with	ZBTB17 (interacts with) IDUA	false
106809	interacts with	ZBTB17 (interacts with) MOGS	false
106810	interacts with	ZBTB17 (interacts with) POMT1	false
106811	interacts with	ZBTB17 (interacts with) B4GALT7	false
106812	interacts with	ZBTB17 (interacts with) GALK1	false
106813	interacts with	ZBTB17 (interacts with) FKRP	false
106814	interacts with	ZBTB17 (interacts with) CHST12	false
106815	interacts with	ZBTB17 (interacts with) B4GALT2	false
106816	interacts with	ZBTB17 (interacts with) B3GALT4	false
106817	interacts with	ZBTB17 (interacts with) HYAL2	false
106818	interacts with	ZBTB33 (interacts with) ALG10	false
106819	interacts with	ZBTB33 (interacts with) C1GALT1C1	false
106820	interacts with	ZBTB33 (interacts with) SLC35A3	false
106821	interacts with	ZBTB33 (interacts with) SLC35A5	false
106822	interacts with	ZBTB33 (interacts with) SLC35F5	false
106823	interacts with	ZBTB33 (interacts with) UGGT1	false
106824	interacts with	ZBTB33 (interacts with) PIGN	false
