# Supplementary material for: A systems-based framework to computationally describe putative transcription factors and signaling pathways regulating glycan biosynthesis
Source: publisher site journal article supplement (doi:10.3762/bjoc.17.119), 2021-07-22
Supplement: Additional file 2 [file 1860-5397-17-119-S2.cys › CytoscapeSession-2021_03_21-12_01/tables/105674-Luminal+Breast/LOCAL_ATTRS-org.cytoscape.model.CyNode-Luminal+Breast+default+node.cytable]

CyCSV-Version	1
SUID	name	nodeType	selected
java.lang.Long	java.lang.String	java.lang.String	java.lang.Boolean
		mutable
Luminal Breast default node
105684	ADNP	TF	false
105685	FUT7	Glycogene	false
105686	AFF4	TF	false
105687	MAN1A2	Glycogene	false
105688	STT3B	Glycogene	false
105689	NEU3	Glycogene	false
105690	FUT11	Glycogene	false
105691	ACER2	Glycogene	false
105692	COG5	Glycogene	false
105693	AR	TF	false
105694	MAN2A1	Glycogene	false
105695	SLC35A3	Glycogene	false
105696	SLC35F5	Glycogene	false
105697	GALNT10	Glycogene	false
105698	ST8SIA6	Glycogene	false
105699	ARID2	TF	false
105700	RTF1	Glycogene	false
105701	ATF1	TF	false
105702	SLC35A5	Glycogene	false
105703	GALNT4	Glycogene	false
105704	ATF2	TF	false
105705	UGGT1	Glycogene	false
105706	ATF3	TF	false
105707	B3GNT5	Glycogene	false
105708	HAS1	Glycogene	false
105709	HAS2	Glycogene	false
105710	ATF7IP	TF	false
105711	ALG10	Glycogene	false
105712	ATRX	TF	false
105713	FKTN	Glycogene	false
105714	BACH1	TF	false
105715	CSGALNACT2	Glycogene	false
105716	MAN1A1	Glycogene	false
105717	CHSY1	Glycogene	false
105718	CHST11	Glycogene	false
105719	GFPT2	Glycogene	false
105720	ST6GAL2	Glycogene	false
105721	BATF	TF	false
105722	DPM3	Glycogene	false
105723	BATF3	TF	false
105724	MGAT1	Glycogene	false
105725	BCAT1	TF	false
105726	BMI1	TF	false
105727	ALG10B	Glycogene	false
105728	BRCA1	TF	false
105729	PIGW	Glycogene	false
105730	PIGN	Glycogene	false
105731	FAM20B	Glycogene	false
105732	SLC35E3	Glycogene	false
105733	BRD1	TF	false
105734	ALG12	Glycogene	false
105735	PMM1	Glycogene	false
105736	C17orf49	TF	false
105737	HYAL2	Glycogene	false
105738	CASP8AP2	TF	false
105739	CBFB	TF	false
105740	GALNS	Glycogene	false
105741	CBX3	TF	false
105742	CMAS	Glycogene	false
105743	CBX4	TF	false
105744	RFNG	Glycogene	false
105745	CBX7	TF	false
105746	ST6GALNAC6	Glycogene	false
105747	ST3GAL3	Glycogene	false
105748	MAN2A2	Glycogene	false
105749	IDUA	Glycogene	false
105750	MGAT3	Glycogene	false
105751	HYAL1	Glycogene	false
105752	CBX8	TF	false
105753	GALK1	Glycogene	false
105754	B3GAT3	Glycogene	false
105755	CCDC101	TF	false
105756	CDK8	TF	false
105757	CDK9	TF	false
105758	DPM2	Glycogene	false
105759	PIGQ	Glycogene	false
105760	MAN1B1	Glycogene	false
105761	POMT1	Glycogene	false
105762	MOGS	Glycogene	false
105763	CHST12	Glycogene	false
105764	CEBPA	TF	false
105765	NAGK	Glycogene	false
105766	MFNG	Glycogene	false
105767	CEBPB	TF	false
105768	A4GALT	Glycogene	false
105769	CHD1	TF	false
105770	CHD2	TF	false
105771	OGT	Glycogene	false
105772	NDST2	Glycogene	false
105773	CHD4	TF	false
105774	CHD8	TF	false
105775	CIITA	TF	false
105776	LAMP3	Glycogene	false
105777	MAN2B1	Glycogene	false
105778	GAL3ST4	Glycogene	false
105779	DSE	Glycogene	false
105780	CPSF3L	TF	false
105781	B3GALT6	Glycogene	false
105782	B4GALT7	Glycogene	false
105783	POMGNT1	Glycogene	false
105784	B4GALNT4	Glycogene	false
105785	CREB1	TF	false
105786	CREB3	TF	false
105787	GMPPA	Glycogene	false
105788	CREB3L4	TF	false
105789	B4GALT3	Glycogene	false
105790	CREBBP	TF	false
105791	COG7	Glycogene	false
105792	POFUT1	Glycogene	false
105793	CTBP1	TF	false
105794	CTNNB1	TF	false
105795	DEK	TF	false
105796	E2F1	TF	false
105797	ALG3	Glycogene	false
105798	SLC35B1	Glycogene	false
105799	DPM1	Glycogene	false
105800	KHK	Glycogene	false
105801	E2F6	TF	false
105802	FUT1	Glycogene	false
105803	E2F7	TF	false
105804	EBF1	TF	false
105805	CSGALNACT1	Glycogene	false
105806	ST3GAL2	Glycogene	false
105807	CHST3	Glycogene	false
105808	B3GALT2	Glycogene	false
105809	TPST1	Glycogene	false
105810	FUT4	Glycogene	false
105811	ST3GAL6	Glycogene	false
105812	GALNT12	Glycogene	false
105813	EGLN2	TF	false
105814	EGR1	TF	false
105815	ST6GALNAC3	Glycogene	false
105816	EGR2	TF	false
105817	HPSE2	Glycogene	false
105818	B3GALT1	Glycogene	false
105819	EHF	TF	false
105820	UAP1	Glycogene	false
105821	EHMT2	TF	false
105822	ELF1	TF	false
105823	COG3	Glycogene	false
105824	COG6	Glycogene	false
105825	ELF2	TF	false
105826	ELK3	TF	false
105827	ELK4	TF	false
105828	ELL	TF	false
105829	EP400	TF	false
105830	ERCC6	TF	false
105831	ERF	TF	false
105832	ERG	TF	false
105833	CHSY3	Glycogene	false
105834	ST8SIA4	Glycogene	false
105835	CHST7	Glycogene	false
105836	UST	Glycogene	false
105837	SULT1C4	Glycogene	false
105838	CHST2	Glycogene	false
105839	ETS1	TF	false
105840	ST8SIA1	Glycogene	false
105841	HS3ST3B1	Glycogene	false
105842	ETV1	TF	false
105843	ARSB	Glycogene	false
105844	EXTL2	Glycogene	false
105845	SLC35B4	Glycogene	false
105846	EZH1	TF	false
105847	FANCD2	TF	false
105848	FLI1	TF	false
105849	FOS	TF	false
105850	FOXA1	TF	false
105851	GLCE	Glycogene	false
105852	PIGH	Glycogene	false
105853	FOXM1	TF	false
105854	RPN2	Glycogene	false
105855	GNPNAT1	Glycogene	false
105856	FOXO1	TF	false
105857	DSEL	Glycogene	false
105858	FOXP3	TF	false
105859	HK3	Glycogene	false
105860	NPL	Glycogene	false
105861	GABPA	TF	false
105862	GATA6	TF	false
105863	GATAD1	TF	false
105864	ALG13	Glycogene	false
105865	GLI2	TF	false
105866	GLYR1	TF	false
105867	ALG1	Glycogene	false
105868	GTF2B	TF	false
105869	CTBS	Glycogene	false
105870	GTF2F1	TF	false
105871	GTF2I	TF	false
105872	H2AFX	TF	false
105873	HCFC1	TF	false
105874	PIGO	Glycogene	false
105875	HECTD1	TF	false
105876	HES4	TF	false
105877	HINFP	TF	false
105878	DPAGT1	Glycogene	false
105879	HSF1	TF	false
105880	TSTA3	Glycogene	false
105881	GPAA1	Glycogene	false
105882	IKZF1	TF	false
105883	GM2A	Glycogene	false
105884	LIPA	Glycogene	false
105885	INO80	TF	false
105886	INTS3	TF	false
105887	IRF1	TF	false
105888	IRF4	TF	false
105889	IRF5	TF	false
105890	IRF8	TF	false
105891	JDP2	TF	false
105892	JMJD1C	TF	false
105893	MGAT5	Glycogene	false
105894	JMJD6	TF	false
105895	JUN	TF	false
105896	FKRP	Glycogene	false
105897	GBGT1	Glycogene	false
105898	JUNB	TF	false
105899	JUND	TF	false
105900	KAT5	TF	false
105901	KDM1A	TF	false
105902	GNB1	Glycogene	false
105903	KDM3A	TF	false
105904	KDM5A	TF	false
105905	GNS	Glycogene	false
105906	HS2ST1	Glycogene	false
105907	KDM5B	TF	false
105908	B3GALNT2	Glycogene	false
105909	LMO2	TF	false
105910	HS3ST1	Glycogene	false
105911	LYL1	TF	false
105912	RENBP	Glycogene	false
105913	CHST13	Glycogene	false
105914	MAFB	TF	false
105915	MAX	TF	false
105916	MAZ	TF	false
105917	B4GALT2	Glycogene	false
105918	MGAT4B	Glycogene	false
105919	MECOM	TF	false
105920	ST6GALNAC1	Glycogene	false
105921	MECP2	TF	false
105922	IDS	Glycogene	false
105923	NDST1	Glycogene	false
105924	MED1	TF	false
105925	MEF2A	TF	false
105926	MEF2C	TF	false
105927	SLC35F1	Glycogene	false
105928	MEIS1	TF	false
105929	MITF	TF	false
105930	CHST6	Glycogene	false
105931	MRE11A	TF	false
105932	MSX1	TF	false
105933	MXD3	TF	false
105934	MYBL1	TF	false
105935	MYBL2	TF	false
105936	RPN1	Glycogene	false
105937	MYH11	TF	false
105938	HS3ST4	Glycogene	false
105939	CHST9	Glycogene	false
105940	SLC35F3	Glycogene	false
105941	HAS3	Glycogene	false
105942	MZF1	TF	false
105943	NFAT5	TF	false
105944	NFATC1	TF	false
105945	NFIC	TF	false
105946	NFYC	TF	false
105947	NIPBL	TF	false
105948	NPAT	TF	false
105949	NR2C2	TF	false
105950	SLC35D1	Glycogene	false
105951	NR2F1	TF	false
105952	NR5A2	TF	false
105953	PBX1	TF	false
105954	PIGM	Glycogene	false
105955	PCGF1	TF	false
105956	PHF20	TF	false
105957	PHF6	TF	false
105958	PIAS1	TF	false
105959	POLR2B	TF	false
105960	POLR3A	TF	false
105961	PPARG	TF	false
105962	PRDM1	TF	false
105963	PRKDC	TF	false
105964	RAC3	TF	false
105965	RB1	TF	false
105966	UGGT2	Glycogene	false
105967	RBBP5	TF	false
105968	RBL2	TF	false
105969	RCOR1	TF	false
105970	REST	TF	false
105971	RFX1	TF	false
105972	RFX5	TF	false
105973	COG2	Glycogene	false
105974	RFX7	TF	false
105975	RNF2	TF	false
105976	FPGT	Glycogene	false
105977	RORA	TF	false
105978	RUNX1	TF	false
105979	SULF2	Glycogene	false
105980	ST8SIA2	Glycogene	false
105981	RUNX2	TF	false
105982	RUNX3	TF	false
105983	RXRA	TF	false
105984	SIN3A	TF	false
105985	UGCG	Glycogene	false
105986	SIX5	TF	false
105987	SMAD4	TF	false
105988	SMARCC2	TF	false
105989	SMC1A	TF	false
105990	SMC3	TF	false
105991	SOX10	TF	false
105992	SOX17	TF	false
105993	SPDEF	TF	false
105994	SRCAP	TF	false
105995	SREBF2	TF	false
105996	SRF	TF	false
105997	SSRP1	TF	false
105998	GANAB	Glycogene	false
105999	STAT1	TF	false
106000	HPSE	Glycogene	false
106001	STAT2	TF	false
106002	STAT4	TF	false
106003	STAT5A	TF	false
106004	SUMO2	TF	false
106005	COG1	Glycogene	false
106006	TAF1	TF	false
106007	TCF12	TF	false
106008	TCF7	TF	false
106009	TCF7L1	TF	false
106010	TCF7L2	TF	false
106011	TDRD3	TF	false
106012	ALG5	Glycogene	false
106013	TEAD1	TF	false
106014	GALNT1	Glycogene	false
106015	TERF1	TF	false
106016	TET2	TF	false
106017	TP63	TF	false
106018	TRIM28	TF	false
106019	TTF2	TF	false
106020	UBTF	TF	false
106021	USF1	TF	false
106022	USF2	TF	false
106023	VEZF1	TF	false
106024	WDR5	TF	false
106025	XRN2	TF	false
106026	YAP1	TF	false
106027	GALNT5	Glycogene	false
106028	YY1	TF	false
106029	ZBTB17	TF	false
106030	B3GALT4	Glycogene	false
106031	ZBTB33	TF	false
106032	C1GALT1C1	Glycogene	false
