# Supplementary material for: A systems-based framework to computationally describe putative transcription factors and signaling pathways regulating glycan biosynthesis
Source: publisher site journal article supplement (doi:10.3762/bjoc.17.119), 2021-07-22
Supplement: Additional file 2 [file 1860-5397-17-119-S2.cys › CytoscapeSession-2021_03_21-12_01/tables/106825-Basal+Breast/LOCAL_ATTRS-org.cytoscape.model.CyEdge-Basal+Breast+default+edge.cytable]

CyCSV-Version	1
SUID	interaction	name	selected
java.lang.Long	java.lang.String	java.lang.String	java.lang.Boolean
Basal Breast default edge
106895	interacts with	ADNP (interacts with) FUT7	false
106896	interacts with	AFF4 (interacts with) MAN1A2	false
106897	interacts with	AFF4 (interacts with) STT3B	false
106898	interacts with	AFF4 (interacts with) NEU3	false
106899	interacts with	AFF4 (interacts with) FUT11	false
106900	interacts with	AFF4 (interacts with) MAN2A1	false
106901	interacts with	AFF4 (interacts with) ACER2	false
106902	interacts with	AFF4 (interacts with) COG5	false
106903	interacts with	AFF4 (interacts with) UGCG	false
106904	interacts with	AFF4 (interacts with) GALNT10	false
106905	interacts with	AFF4 (interacts with) UGGT1	false
106906	interacts with	AFF4 (interacts with) SLC35A3	false
106907	interacts with	AFF4 (interacts with) SLC35D1	false
106908	interacts with	AFF4 (interacts with) SLC35A5	false
106909	interacts with	AFF4 (interacts with) SLC35F5	false
106910	interacts with	AFF4 (interacts with) HS2ST1	false
106911	interacts with	AFF4 (interacts with) PIGK	false
106912	interacts with	AHR (interacts with) UGCG	false
106913	interacts with	AHR (interacts with) HAS2	false
106914	interacts with	ASCL2 (interacts with) GM2A	false
106915	interacts with	ATF1 (interacts with) SLC35A3	false
106916	interacts with	ATF2 (interacts with) MAN1A2	false
106917	interacts with	ATF2 (interacts with) MAN2A1	false
106918	interacts with	ATF2 (interacts with) FUT11	false
106919	interacts with	ATF2 (interacts with) SLC35F5	false
106920	interacts with	ATF2 (interacts with) ACER2	false
106921	interacts with	ATF2 (interacts with) NEU3	false
106922	interacts with	ATF2 (interacts with) UGGT1	false
106923	interacts with	ATF2 (interacts with) COG5	false
106924	interacts with	ATF2 (interacts with) SLC35A3	false
106925	interacts with	ATF2 (interacts with) FKTN	false
106926	interacts with	ATF2 (interacts with) SLC35A5	false
106927	interacts with	ATF7IP (interacts with) ALG10	false
106928	interacts with	ATRX (interacts with) PIGK	false
106929	interacts with	BACH1 (interacts with) CSGALNACT2	false
106930	interacts with	BACH1 (interacts with) UGCG	false
106931	interacts with	BACH1 (interacts with) MAN1A2	false
106932	interacts with	BACH1 (interacts with) FUT11	false
106933	interacts with	BACH1 (interacts with) ACER2	false
106934	interacts with	BACH1 (interacts with) B3GNT2	false
106935	interacts with	BATF (interacts with) FUT7	false
106936	interacts with	BATF (interacts with) NAGK	false
106937	interacts with	BATF (interacts with) CHST12	false
106938	interacts with	BATF (interacts with) ST6GALNAC4	false
106939	interacts with	BATF (interacts with) RENBP	false
106940	interacts with	BATF3 (interacts with) MGAT1	false
106941	interacts with	BATF3 (interacts with) TPST2	false
106942	interacts with	BCL11A (interacts with) UGT8	false
106943	interacts with	BRD4 (interacts with) SLC35E1	false
106944	interacts with	C17orf49 (interacts with) B3GAT3	false
106945	interacts with	CASP8AP2 (interacts with) ALG10B	false
106946	interacts with	CASP8AP2 (interacts with) ALG10	false
106947	interacts with	CASP8AP2 (interacts with) SLC35A5	false
106948	interacts with	CBFA2T3 (interacts with) LFNG	false
106949	interacts with	CBFA2T3 (interacts with) ST3GAL2	false
106950	interacts with	CBFA2T3 (interacts with) TPST2	false
106951	interacts with	CBX6 (interacts with) ST3GAL2	false
106952	interacts with	CBX8 (interacts with) RFNG	false
106953	interacts with	CBX8 (interacts with) GALK1	false
106954	interacts with	CBX8 (interacts with) B3GAT3	false
106955	interacts with	CCDC101 (interacts with) B3GAT3	false
106956	interacts with	CDK12 (interacts with) ACER2	false
106957	interacts with	CDK8 (interacts with) STT3B	false
106958	interacts with	CDK8 (interacts with) COG5	false
106959	interacts with	CDK9 (interacts with) DPM2	false
106960	interacts with	CDK9 (interacts with) ST6GALNAC6	false
106961	interacts with	CDK9 (interacts with) TSTA3	false
106962	interacts with	CHD1 (interacts with) MAN2A1	false
106963	interacts with	CHD1 (interacts with) SLC35D1	false
106964	interacts with	CHD1 (interacts with) SLC35A3	false
106965	interacts with	CHD1 (interacts with) SLC35A5	false
106966	interacts with	CHD2 (interacts with) MAN1A2	false
106967	interacts with	CHD2 (interacts with) MAN2A2	false
106968	interacts with	CHD2 (interacts with) MGAT5	false
106969	interacts with	CHD4 (interacts with) NEU3	false
106970	interacts with	CHD4 (interacts with) GANAB	false
106971	interacts with	CHD8 (interacts with) NEU3	false
106972	interacts with	CHD8 (interacts with) STT3B	false
106973	interacts with	CHD8 (interacts with) ACER2	false
106974	interacts with	CHD8 (interacts with) UGCG	false
106975	interacts with	CIITA (interacts with) FUT7	false
106976	interacts with	CLOCK (interacts with) FUT11	false
106977	interacts with	CPSF3L (interacts with) B3GALT6	false
106978	interacts with	CREB3 (interacts with) PIGO	false
106979	interacts with	CTNNB1 (interacts with) STT3B	false
106980	interacts with	DCP1A (interacts with) STT3B	false
106981	interacts with	DEK (interacts with) B3GNT5	false
106982	interacts with	EBF1 (interacts with) MAN1A1	false
106983	interacts with	EGLN2 (interacts with) GALT	false
106984	interacts with	EHMT2 (interacts with) B4GALNT4	false
106985	interacts with	ELF1 (interacts with) COG3	false
106986	interacts with	ELF1 (interacts with) SLC35A3	false
106987	interacts with	ELF1 (interacts with) UGCG	false
106988	interacts with	ELF1 (interacts with) MAN1A1	false
106989	interacts with	ELF2 (interacts with) SLC35A5	false
106990	interacts with	ELK3 (interacts with) FUT11	false
106991	interacts with	ELK4 (interacts with) ALG10	false
106992	interacts with	ELK4 (interacts with) FAM20B	false
106993	interacts with	ELK4 (interacts with) UGGT1	false
106994	interacts with	ELL2 (interacts with) CSGALNACT1	false
106995	interacts with	ERCC6 (interacts with) MAN1A2	false
106996	interacts with	ERCC6 (interacts with) CSGALNACT2	false
106997	interacts with	ERG (interacts with) MFNG	false
106998	interacts with	ERG (interacts with) CHSY3	false
106999	interacts with	ERG (interacts with) MAN1C1	false
107000	interacts with	ERG (interacts with) CHST7	false
107001	interacts with	ERG (interacts with) XYLT1	false
107002	interacts with	ERG (interacts with) MAN1A1	false
107003	interacts with	ETS1 (interacts with) MFNG	false
107004	interacts with	ETS1 (interacts with) ST8SIA4	false
107005	interacts with	FLI1 (interacts with) MFNG	false
107006	interacts with	FLI1 (interacts with) ST8SIA4	false
107007	interacts with	FLI1 (interacts with) ST3GAL2	false
107008	interacts with	FLI1 (interacts with) ST6GAL1	false
107009	interacts with	FLI1 (interacts with) FUT7	false
107010	interacts with	FLI1 (interacts with) MAN1C1	false
107011	interacts with	FLI1 (interacts with) FUCA1	false
107012	interacts with	FLI1 (interacts with) ST3GAL5	false
107013	interacts with	FLI1 (interacts with) TPST2	false
107014	interacts with	FLI1 (interacts with) GCNT4	false
107015	interacts with	FOXA1 (interacts with) GALNT7	false
107016	interacts with	FOXA1 (interacts with) MGAT4A	false
107017	interacts with	FOXA1 (interacts with) GALNT10	false
107018	interacts with	FOXA1 (interacts with) LFNG	false
107019	interacts with	FOXO1 (interacts with) CHST15	false
107020	interacts with	FOXO1 (interacts with) GCNT4	false
107021	interacts with	FOXP3 (interacts with) FUT7	false
107022	interacts with	FOXP3 (interacts with) ST8SIA4	false
107023	interacts with	FOXP3 (interacts with) MFNG	false
107024	interacts with	FUS (interacts with) B4GALNT4	false
107025	interacts with	FUS (interacts with) B3GAT3	false
107026	interacts with	GABPA (interacts with) ALG10B	false
107027	interacts with	GABPA (interacts with) PIGK	false
107028	interacts with	GAPDH (interacts with) GPI	false
107029	interacts with	GLYR1 (interacts with) COG7	false
107030	interacts with	GLYR1 (interacts with) ALG1	false
107031	interacts with	GPS2 (interacts with) GALK1	false
107032	interacts with	GPS2 (interacts with) NAGK	false
107033	interacts with	GPS2 (interacts with) CHST12	false
107034	interacts with	GRHL1 (interacts with) B3GNT5	false
107035	interacts with	GTF2I (interacts with) COG5	false
107036	interacts with	GTF2I (interacts with) UGGT1	false
107037	interacts with	H2AFX (interacts with) B3GAT3	false
107038	interacts with	H2AFX (interacts with) RFNG	false
107039	interacts with	HCFC1 (interacts with) NEU3	false
107040	interacts with	HECTD1 (interacts with) FUT11	false
107041	interacts with	HECTD1 (interacts with) UGCG	false
107042	interacts with	HES4 (interacts with) GALK1	false
107043	interacts with	HIF1A (interacts with) STT3B	false
107044	interacts with	HIF1A (interacts with) FUT11	false
107045	interacts with	HIF1A (interacts with) SLC35F5	false
107046	interacts with	HIF1A (interacts with) MGAT2	false
107047	interacts with	HIF1A (interacts with) GALC	false
107048	interacts with	HOXB4 (interacts with) TPST2	false
107049	interacts with	HOXB4 (interacts with) LFNG	false
107050	interacts with	HOXB4 (interacts with) MGAT1	false
107051	interacts with	HSF1 (interacts with) TSTA3	false
107052	interacts with	HSF1 (interacts with) RFNG	false
107053	interacts with	HSF1 (interacts with) B4GALT2	false
107054	interacts with	IKZF1 (interacts with) MFNG	false
107055	interacts with	IKZF1 (interacts with) ST8SIA4	false
107056	interacts with	IKZF1 (interacts with) LAMP3	false
107057	interacts with	IKZF1 (interacts with) ST3GAL5	false
107058	interacts with	IKZF1 (interacts with) ST6GAL1	false
107059	interacts with	IKZF1 (interacts with) FUCA1	false
107060	interacts with	IKZF1 (interacts with) NPL	false
107061	interacts with	IKZF1 (interacts with) UGCG	false
107062	interacts with	INO80 (interacts with) RTF1	false
107063	interacts with	INO80 (interacts with) MAN2A1	false
107064	interacts with	INO80 (interacts with) HS3ST3B1	false
107065	interacts with	IRF1 (interacts with) HK3	false
107066	interacts with	IRF2 (interacts with) LAMP3	false
107067	interacts with	IRF2 (interacts with) ST8SIA4	false
107068	interacts with	IRF3 (interacts with) B3GAT3	false
107069	interacts with	IRF3 (interacts with) GALK1	false
107070	interacts with	IRF3 (interacts with) GALT	false
107071	interacts with	IRF3 (interacts with) B4GALT7	false
107072	interacts with	IRF3 (interacts with) MGAT1	false
107073	interacts with	IRF4 (interacts with) ST3GAL5	false
107074	interacts with	IRF5 (interacts with) HK3	false
107075	interacts with	IRF5 (interacts with) FUT7	false
107076	interacts with	IRF5 (interacts with) MGAT1	false
107077	interacts with	IRF8 (interacts with) HK3	false
107078	interacts with	IRF8 (interacts with) ST8SIA4	false
107079	interacts with	IRF8 (interacts with) LIPA	false
107080	interacts with	IRF8 (interacts with) FUCA1	false
107081	interacts with	IRF8 (interacts with) GM2A	false
107082	interacts with	IRF8 (interacts with) ST6GAL1	false
107083	interacts with	IRF8 (interacts with) DSE	false
107084	interacts with	IRF8 (interacts with) TPST2	false
107085	interacts with	JDP2 (interacts with) MGAT1	false
107086	interacts with	JMJD1C (interacts with) FUT11	false
107087	interacts with	JMJD1C (interacts with) CSGALNACT2	false
107088	interacts with	JMJD1C (interacts with) SLC35A5	false
107089	interacts with	JMJD1C (interacts with) COG5	false
107090	interacts with	JMJD1C (interacts with) SLC35A3	false
107091	interacts with	JMJD6 (interacts with) RFNG	false
107092	interacts with	JMJD6 (interacts with) GALK1	false
107093	interacts with	JMJD6 (interacts with) COG1	false
107094	interacts with	KDM1B (interacts with) EXTL2	false
107095	interacts with	KDM3A (interacts with) SLC35A3	false
107096	interacts with	KDM4A (interacts with) GANAB	false
107097	interacts with	KDM5A (interacts with) NEU3	false
107098	interacts with	LEF1 (interacts with) ST8SIA4	false
107099	interacts with	LEF1 (interacts with) MFNG	false
107100	interacts with	LEF1 (interacts with) GCNT4	false
107101	interacts with	LYL1 (interacts with) MFNG	false
107102	interacts with	LYL1 (interacts with) FUT7	false
107103	interacts with	LYL1 (interacts with) MAN2B1	false
107104	interacts with	LYL1 (interacts with) MGAT1	false
107105	interacts with	LYL1 (interacts with) RENBP	false
107106	interacts with	LYL1 (interacts with) CHST12	false
107107	interacts with	LYL1 (interacts with) ST6GALNAC6	false
107108	interacts with	LYL1 (interacts with) ST3GAL2	false
107109	interacts with	LYL1 (interacts with) IDUA	false
107110	interacts with	LYL1 (interacts with) NAGK	false
107111	interacts with	LYL1 (interacts with) ST6GALNAC4	false
107112	interacts with	LYL1 (interacts with) B3GALT4	false
107113	interacts with	MAF (interacts with) ST8SIA4	false
107114	interacts with	MAF (interacts with) TPST2	false
107115	interacts with	MAFB (interacts with) DSE	false
107116	interacts with	MAFB (interacts with) GALNT10	false
107117	interacts with	MAZ (interacts with) B4GALT2	false
107118	interacts with	MAZ (interacts with) B3GAT3	false
107119	interacts with	MAZ (interacts with) B4GALNT4	false
107120	interacts with	MED1 (interacts with) FUT11	false
107121	interacts with	MEF2A (interacts with) CHSY1	false
107122	interacts with	MEF2A (interacts with) XYLT1	false
107123	interacts with	MEF2B (interacts with) CHST12	false
107124	interacts with	MEF2B (interacts with) ST6GALNAC4	false
107125	interacts with	MEF2C (interacts with) MAN1A1	false
107126	interacts with	MEF2C (interacts with) GALNT10	false
107127	interacts with	MEF2C (interacts with) XYLT1	false
107128	interacts with	MEIS3 (interacts with) ST3GAL2	false
107129	interacts with	MRE11A (interacts with) NEU3	false
107130	interacts with	MSX1 (interacts with) ST3GAL2	false
107131	interacts with	MXD3 (interacts with) B3GAT3	false
107132	interacts with	MXD3 (interacts with) NAGK	false
107133	interacts with	MYBL1 (interacts with) FUT1	false
107134	interacts with	MYH11 (interacts with) XYLT1	false
107135	interacts with	NFAT5 (interacts with) COG5	false
107136	interacts with	NFYC (interacts with) ST3GAL3	false
107137	interacts with	NFYC (interacts with) MOGS	false
107138	interacts with	NIPBL (interacts with) NEU3	false
107139	interacts with	NIPBL (interacts with) UGGT1	false
107140	interacts with	NIPBL (interacts with) MGAT5	false
107141	interacts with	NIPBL (interacts with) COG5	false
107142	interacts with	NIPBL (interacts with) MAN2A1	false
107143	interacts with	NIPBL (interacts with) UGCG	false
107144	interacts with	NIPBL (interacts with) ACER2	false
107145	interacts with	NIPBL (interacts with) SLC35A3	false
107146	interacts with	NPAT (interacts with) FUT11	false
107147	interacts with	NR2C2 (interacts with) STT3B	false
107148	interacts with	NR2C2 (interacts with) FKTN	false
107149	interacts with	NR2C2 (interacts with) ALG10B	false
107150	interacts with	PCGF1 (interacts with) RFNG	false
107151	interacts with	PHF6 (interacts with) FAM20B	false
107152	interacts with	PHF6 (interacts with) ALG6	false
107153	interacts with	PIAS1 (interacts with) MGAT5	false
107154	interacts with	PIAS1 (interacts with) UGCG	false
107155	interacts with	PIAS1 (interacts with) SLC35A5	false
107156	interacts with	POLR2B (interacts with) FKTN	false
107157	interacts with	POLR2B (interacts with) NEU3	false
107158	interacts with	POLR3A (interacts with) FUT11	false
107159	interacts with	POU2F2 (interacts with) MAN1A1	false
107160	interacts with	PPARA (interacts with) GFPT1	false
107161	interacts with	PRDM1 (interacts with) SULF1	false
107162	interacts with	PRDM1 (interacts with) CHST11	false
107163	interacts with	PRDM1 (interacts with) NPL	false
107164	interacts with	PRKDC (interacts with) NEU3	false
107165	interacts with	RAC3 (interacts with) GALK1	false
107166	interacts with	RARA (interacts with) LFNG	false
107167	interacts with	RBBP5 (interacts with) MAN1A2	false
107168	interacts with	RBBP5 (interacts with) FAM20B	false
107169	interacts with	RBBP5 (interacts with) UGGT1	false
107170	interacts with	RBBP5 (interacts with) SLC35A3	false
107171	interacts with	RBBP5 (interacts with) NEU3	false
107172	interacts with	RBBP5 (interacts with) HS2ST1	false
107173	interacts with	RBBP5 (interacts with) FKTN	false
107174	interacts with	RBBP5 (interacts with) SLC35A5	false
107175	interacts with	RBL2 (interacts with) MAN2A1	false
107176	interacts with	RBL2 (interacts with) COG6	false
107177	interacts with	RBL2 (interacts with) MAN1A2	false
107178	interacts with	RBL2 (interacts with) GNS	false
107179	interacts with	RCOR1 (interacts with) MAN2A1	false
107180	interacts with	RCOR1 (interacts with) FKTN	false
107181	interacts with	RCOR1 (interacts with) MAN1A2	false
107182	interacts with	RCOR1 (interacts with) UGGT1	false
107183	interacts with	REST (interacts with) FUT11	false
107184	interacts with	RFX7 (interacts with) NEU3	false
107185	interacts with	RFX7 (interacts with) GALNT4	false
107186	interacts with	RNF2 (interacts with) B3GNT5	false
107187	interacts with	RUNX2 (interacts with) CHST15	false
107188	interacts with	RUNX2 (interacts with) GALNT10	false
107189	interacts with	RUNX2 (interacts with) TPST2	false
107190	interacts with	RUNX3 (interacts with) FUT7	false
107191	interacts with	SIN3A (interacts with) NEU3	false
107192	interacts with	SIRT6 (interacts with) DPM2	false
107193	interacts with	SIRT6 (interacts with) B3GAT3	false
107194	interacts with	SIRT6 (interacts with) RFNG	false
107195	interacts with	SIRT6 (interacts with) PIGQ	false
107196	interacts with	SIRT6 (interacts with) B4GALT7	false
107197	interacts with	SIRT6 (interacts with) DPM3	false
107198	interacts with	SIRT6 (interacts with) GALK1	false
107199	interacts with	SIRT6 (interacts with) B3GALT6	false
107200	interacts with	SIRT6 (interacts with) IDUA	false
107201	interacts with	SIRT6 (interacts with) B4GALNT4	false
107202	interacts with	SIRT6 (interacts with) NAGK	false
107203	interacts with	SIX5 (interacts with) PIGQ	false
107204	interacts with	SIX5 (interacts with) B4GALT7	false
107205	interacts with	SIX5 (interacts with) DPM3	false
107206	interacts with	SIX5 (interacts with) GALK1	false
107207	interacts with	SMAD2 (interacts with) GALNT1	false
107208	interacts with	SMC1A (interacts with) NEU3	false
107209	interacts with	SMC3 (interacts with) NEU3	false
107210	interacts with	SOX10 (interacts with) EXTL1	false
107211	interacts with	SOX10 (interacts with) CHST3	false
107212	interacts with	SOX10 (interacts with) ST3GAL6	false
107213	interacts with	SPDEF (interacts with) GALNT7	false
107214	interacts with	SPIB (interacts with) FUT7	false
107215	interacts with	SPIB (interacts with) CHST2	false
107216	interacts with	SRCAP (interacts with) COG7	false
107217	interacts with	STAT1 (interacts with) LAMP3	false
107218	interacts with	STAT1 (interacts with) HPSE	false
107219	interacts with	STAT2 (interacts with) LAMP3	false
107220	interacts with	STAT4 (interacts with) FUT7	false
107221	interacts with	STAT4 (interacts with) ST8SIA4	false
107222	interacts with	TAF1 (interacts with) NEU3	false
107223	interacts with	TAF1 (interacts with) MAN1A2	false
107224	interacts with	TAF1 (interacts with) OGT	false
107225	interacts with	TAF1 (interacts with) STT3B	false
107226	interacts with	TAF1 (interacts with) UGCG	false
107227	interacts with	TAF1 (interacts with) ACER2	false
107228	interacts with	TAF1 (interacts with) ALG10B	false
107229	interacts with	TAF1 (interacts with) FKTN	false
107230	interacts with	TAF1 (interacts with) SLC35D1	false
107231	interacts with	TAF1 (interacts with) UGGT1	false
107232	interacts with	TBX21 (interacts with) FUT7	false
107233	interacts with	TBX21 (interacts with) GM2A	false
107234	interacts with	TBX21 (interacts with) LFNG	false
107235	interacts with	TBX21 (interacts with) TPST2	false
107236	interacts with	TCF12 (interacts with) FUT11	false
107237	interacts with	TCF12 (interacts with) STT3B	false
107238	interacts with	TCF12 (interacts with) COG5	false
107239	interacts with	TCF12 (interacts with) UGGT1	false
107240	interacts with	TCF12 (interacts with) SLC35A5	false
107241	interacts with	TCF12 (interacts with) MAN2A1	false
107242	interacts with	TCF12 (interacts with) ACER2	false
107243	interacts with	TDRD3 (interacts with) COG6	false
107244	interacts with	TEAD1 (interacts with) EXTL2	false
107245	interacts with	TEAD1 (interacts with) UGGT1	false
107246	interacts with	TEAD1 (interacts with) GALNT1	false
107247	interacts with	TET2 (interacts with) MAN1A2	false
107248	interacts with	TET2 (interacts with) STT3B	false
107249	interacts with	TET2 (interacts with) ACER2	false
107250	interacts with	TET2 (interacts with) UGCG	false
107251	interacts with	TET2 (interacts with) HS2ST1	false
107252	interacts with	THAP11 (interacts with) COG8	false
107253	interacts with	THAP11 (interacts with) COG4	false
107254	interacts with	USF1 (interacts with) DPM3	false
107255	interacts with	USF1 (interacts with) B4GALT3	false
107256	interacts with	USF1 (interacts with) GALT	false
107257	interacts with	USF1 (interacts with) CHST12	false
107258	interacts with	VEZF1 (interacts with) SLC35A5	false
107259	interacts with	YAP1 (interacts with) STT3A	false
107260	interacts with	ZBTB10 (interacts with) SLC35F5	false
107261	interacts with	ZBTB17 (interacts with) B3GAT3	false
107262	interacts with	ZBTB17 (interacts with) NAGK	false
