# Supplementary material for: A systems-based framework to computationally describe putative transcription factors and signaling pathways regulating glycan biosynthesis
Source: publisher site journal article supplement (doi:10.3762/bjoc.17.119), 2021-07-22
Supplement: Additional file 2 [file 1860-5397-17-119-S2.cys › CytoscapeSession-2021_03_21-12_01/tables/107263-CESC/LOCAL_ATTRS-org.cytoscape.model.CyNode-CESC+default+node.cytable]

CyCSV-Version	1
SUID	name	nodeType	selected
java.lang.Long	java.lang.String	java.lang.String	java.lang.Boolean
		mutable
CESC default node
105684	ADNP	TF	false
105685	FUT7	Glycogene	false
106836	AHR	TF	false
105985	UGCG	Glycogene	false
105699	ARID2	TF	false
105700	RTF1	Glycogene	false
105824	COG6	Glycogene	false
107273	ASH2L	TF	false
105791	COG7	Glycogene	false
105701	ATF1	TF	false
105688	STT3B	Glycogene	false
105732	SLC35E3	Glycogene	false
105998	GANAB	Glycogene	false
105715	CSGALNACT2	Glycogene	false
105717	CHSY1	Glycogene	false
107274	B4GALT1	Glycogene	false
105714	BACH1	TF	false
105687	MAN1A2	Glycogene	false
105690	FUT11	Glycogene	false
105691	ACER2	Glycogene	false
105689	NEU3	Glycogene	false
105721	BATF	TF	false
106856	FUCA1	Glycogene	false
106857	ST3GAL5	Glycogene	false
105834	ST8SIA4	Glycogene	false
106860	MGAT4A	Glycogene	false
107275	BCL6	TF	false
105692	COG5	Glycogene	false
105730	PIGN	Glycogene	false
105728	BRCA1	TF	false
105729	PIGW	Glycogene	false
105711	ALG10	Glycogene	false
105705	UGGT1	Glycogene	false
105874	PIGO	Glycogene	false
105695	SLC35A3	Glycogene	false
105727	ALG10B	Glycogene	false
105733	BRD1	TF	false
105734	ALG12	Glycogene	false
105748	MAN2A2	Glycogene	false
105772	NDST2	Glycogene	false
107276	BRD2	TF	false
107277	BRD3	TF	false
107278	FUT10	Glycogene	false
107279	B4GALT5	Glycogene	false
106843	BRD4	TF	false
106844	SLC35E1	Glycogene	false
105792	POFUT1	Glycogene	false
105950	SLC35D1	Glycogene	false
105738	CASP8AP2	TF	false
105702	SLC35A5	Glycogene	false
105739	CBFB	TF	false
105745	CBX7	TF	false
106853	MAN1C1	Glycogene	false
105731	FAM20B	Glycogene	false
105771	OGT	Glycogene	false
105778	GAL3ST4	Glycogene	false
106848	CDK12	TF	false
106891	COG8	Glycogene	false
105756	CDK8	TF	false
105823	COG3	Glycogene	false
105764	CEBPA	TF	false
105765	NAGK	Glycogene	false
107280	HS3ST6	Glycogene	false
105769	CHD1	TF	false
105694	MAN2A1	Glycogene	false
105770	CHD2	TF	false
105774	CHD8	TF	false
106849	CLOCK	TF	false
105780	CPSF3L	TF	false
105781	B3GALT6	Glycogene	false
105785	CREB1	TF	false
105790	CREBBP	TF	false
105795	DEK	TF	false
107281	SLC35B3	Glycogene	false
107282	DNMT3A	TF	false
107283	GAL3ST2	Glycogene	false
105796	E2F1	TF	false
105735	PMM1	Glycogene	false
107284	E2F3	TF	false
105696	SLC35F5	Glycogene	false
105803	E2F7	TF	false
107285	EED	TF	false
107286	ALG8	Glycogene	false
105878	DPAGT1	Glycogene	false
106893	STT3A	Glycogene	false
105819	EHF	TF	false
107287	FUT2	Glycogene	false
107288	FUT6	Glycogene	false
107289	FUT3	Glycogene	false
107290	ASAH1	Glycogene	false
105822	ELF1	TF	false
107291	PAPSS1	Glycogene	false
105826	ELK3	TF	false
105829	EP400	TF	false
105713	FKTN	Glycogene	false
107292	ERCC3	TF	false
105830	ERCC6	TF	false
107293	HK1	Glycogene	false
105848	FLI1	TF	false
105806	ST3GAL2	Glycogene	false
107294	FOSL1	TF	false
105941	HAS3	Glycogene	false
107295	FOSL2	TF	false
105893	MGAT5	Glycogene	false
105850	FOXA1	TF	false
105703	GALNT4	Glycogene	false
106859	GALNT7	Glycogene	false
105920	ST6GALNAC1	Glycogene	false
107296	GCNT2	Glycogene	false
107297	GNE	Glycogene	false
107298	FOXK1	TF	false
105923	NDST1	Glycogene	false
107299	EXTL3	Glycogene	false
105856	FOXO1	TF	false
107300	ALG11	Glycogene	false
106838	B3GNT2	Glycogene	false
105858	FOXP3	TF	false
105859	HK3	Glycogene	false
105766	MFNG	Glycogene	false
105777	MAN2B1	Glycogene	false
105861	GABPA	TF	false
106863	GAPDH	TF	false
106864	GPI	Glycogene	false
105862	GATA6	TF	false
105810	FUT4	Glycogene	false
105866	GLYR1	TF	false
105867	ALG1	Glycogene	false
106866	GRHL1	TF	false
105707	B3GNT5	Glycogene	false
107301	GRHL2	TF	false
107302	GTF3C2	TF	false
105873	HCFC1	TF	false
107303	HDAC1	TF	false
105742	CMAS	Glycogene	false
107304	HDAC3	TF	false
107305	GNPDA1	Glycogene	false
105875	HECTD1	TF	false
106867	HIF1A	TF	false
107306	GALNT2	Glycogene	false
107307	EXT2	Glycogene	false
105697	GALNT10	Glycogene	false
105877	HINFP	TF	false
107308	HOXA6	TF	false
105879	HSF1	TF	false
105880	TSTA3	Glycogene	false
105882	IKZF1	TF	false
105885	INO80	TF	false
105886	INTS3	TF	false
105789	B4GALT3	Glycogene	false
107309	GBA	Glycogene	false
105887	IRF1	TF	false
106871	IRF2	TF	false
105776	LAMP3	Glycogene	false
105888	IRF4	TF	false
105890	IRF8	TF	false
105884	LIPA	Glycogene	false
107310	NAAA	Glycogene	false
107311	JARID2	TF	false
107312	KAT2B	TF	false
107313	KDM2B	TF	false
105750	MGAT3	Glycogene	false
105903	KDM3A	TF	false
105904	KDM5A	TF	false
105907	KDM5B	TF	false
105976	FPGT	Glycogene	false
107314	KDM5C	TF	false
107315	KDM6B	TF	false
107316	KLF11	TF	false
107317	KLF4	TF	false
107318	KLF5	TF	false
107319	ABO	Glycogene	false
107320	LDB1	TF	false
106875	LEF1	TF	false
105720	ST6GAL2	Glycogene	false
107321	LIN9	TF	false
105911	LYL1	TF	false
105724	MGAT1	Glycogene	false
105912	RENBP	Glycogene	false
105763	CHST12	Glycogene	false
105916	MAZ	TF	false
105800	KHK	Glycogene	false
107322	MBD2	TF	false
107323	MBD3	TF	false
105758	DPM2	Glycogene	false
105919	MECOM	TF	false
105924	MED1	TF	false
107324	MED12	TF	false
106032	C1GALT1C1	Glycogene	false
105925	MEF2A	TF	false
107325	MEF2D	TF	false
105928	MEIS1	TF	false
105931	MRE11A	TF	false
105942	MZF1	TF	false
105896	FKRP	Glycogene	false
107326	NCOR2	TF	false
107327	POFUT2	Glycogene	false
107328	PAPSS2	Glycogene	false
105943	NFAT5	TF	false
107329	NFYA	TF	false
105954	PIGM	Glycogene	false
107330	NFYB	TF	false
107331	B4GALT6	Glycogene	false
107332	PIGY	Glycogene	false
105947	NIPBL	TF	false
106835	PIGK	Glycogene	false
105948	NPAT	TF	false
105949	NR2C2	TF	false
107333	NRF1	TF	false
105761	POMT1	Glycogene	false
105953	PBX1	TF	false
105956	PHF20	TF	false
105957	PHF6	TF	false
107334	PHF8	TF	false
107335	SLC35A2	Glycogene	false
105958	PIAS1	TF	false
107336	PML	TF	false
105959	POLR2B	TF	false
105960	POLR3A	TF	false
105965	RB1	TF	false
105967	RBBP5	TF	false
105908	B3GALNT2	Glycogene	false
105906	HS2ST1	Glycogene	false
105968	RBL2	TF	false
105969	RCOR1	TF	false
105855	GNPNAT1	Glycogene	false
105974	RFX7	TF	false
107337	RLF	TF	false
105975	RNF2	TF	false
105978	RUNX1	TF	false
105983	RXRA	TF	false
107338	RYBP	TF	false
107339	SETDB1	TF	false
105973	COG2	Glycogene	false
105984	SIN3A	TF	false
107340	MPI	Glycogene	false
106885	SIRT6	TF	false
107341	SMAD1	TF	false
106879	ALG6	Glycogene	false
107342	SMAD3	TF	false
105987	SMAD4	TF	false
107343	SMARCA4	TF	false
107344	SMARCC1	TF	false
105989	SMC1A	TF	false
105990	SMC3	TF	false
107345	SOX2	TF	false
107346	SP2	TF	false
105994	SRCAP	TF	false
105997	SSRP1	TF	false
105999	STAT1	TF	false
106001	STAT2	TF	false
107347	STAT3	TF	false
105905	GNS	Glycogene	false
106002	STAT4	TF	false
106003	STAT5A	TF	false
107348	STAT6	TF	false
107349	SVIL	TF	false
106006	TAF1	TF	false
107350	LAMP2	Glycogene	false
107351	TAF3	TF	false
106889	TBX21	TF	false
106009	TCF7L1	TF	false
107352	B4GALNT2	Glycogene	false
106011	TDRD3	TF	false
106012	ALG5	Glycogene	false
107353	TERF2	TF	false
106892	COG4	Glycogene	false
106016	TET2	TF	false
107354	TFAP2C	TF	false
107355	TFCP2	TF	false
106890	THAP11	TF	false
106017	TP63	TF	false
106019	TTF2	TF	false
106020	UBTF	TF	false
106021	USF1	TF	false
107356	VDR	TF	false
106024	WDR5	TF	false
106025	XRN2	TF	false
106028	YY1	TF	false
106868	MGAT2	Glycogene	false
106031	ZBTB33	TF	false
