# Supplementary material for: A systems-based framework to computationally describe putative transcription factors and signaling pathways regulating glycan biosynthesis
Source: publisher site journal article supplement (doi:10.3762/bjoc.17.119), 2021-07-22
Supplement: Additional file 2 [file 1860-5397-17-119-S2.cys › CytoscapeSession-2021_03_21-12_01/tables/107960-COAD_READ/HIDDEN-org.cytoscape.model.CyNode-107960+hidden+node.cytable]

"CyCSV-Version","1"
"SUID"
"java.lang.Long"
""
"107960 hidden node",""
