# Supplementary material for: A systems-based framework to computationally describe putative transcription factors and signaling pathways regulating glycan biosynthesis
Source: publisher site journal article supplement (doi:10.3762/bjoc.17.119), 2021-07-22
Supplement: Additional file 2 [file 1860-5397-17-119-S2.cys › CytoscapeSession-2021_03_21-12_01/tables/107960-COAD_READ/LOCAL_ATTRS-org.cytoscape.model.CyNode-COAD_READ+default+node.cytable]

CyCSV-Version	1
SUID	name	nodeType	selected
java.lang.Long	java.lang.String	java.lang.String	java.lang.Boolean
		mutable
COAD_READ default node
106836	AHR	TF	false
105985	UGCG	Glycogene	false
105699	ARID2	TF	false
105700	RTF1	Glycogene	false
107970	ARID3A	TF	false
105854	RPN2	Glycogene	false
105792	POFUT1	Glycogene	false
105799	DPM1	Glycogene	false
107279	B4GALT5	Glycogene	false
106837	ASCL2	TF	false
106846	LFNG	Glycogene	false
107971	NEU1	Glycogene	false
105701	ATF1	TF	false
105702	SLC35A5	Glycogene	false
105704	ATF2	TF	false
105690	FUT11	Glycogene	false
105705	UGGT1	Glycogene	false
105893	MGAT5	Glycogene	false
105884	LIPA	Glycogene	false
105715	CSGALNACT2	Glycogene	false
105838	CHST2	Glycogene	false
107972	ATF7	TF	false
105923	NDST1	Glycogene	false
105712	ATRX	TF	false
107973	AUTS2	TF	false
107974	GALNT11	Glycogene	false
105714	BACH1	TF	false
105687	MAN1A2	Glycogene	false
107975	BARX2	TF	false
107976	FUT8	Glycogene	false
105723	BATF3	TF	false
105859	HK3	Glycogene	false
105724	MGAT1	Glycogene	false
105834	ST8SIA4	Glycogene	false
105718	CHST11	Glycogene	false
105779	DSE	Glycogene	false
105708	HAS1	Glycogene	false
105811	ST3GAL6	Glycogene	false
105728	BRCA1	TF	false
105729	PIGW	Glycogene	false
105733	BRD1	TF	false
105734	ALG12	Glycogene	false
105748	MAN2A2	Glycogene	false
106843	BRD4	TF	false
106844	SLC35E1	Glycogene	false
107977	BRD7	TF	false
107978	C17orf96	TF	false
105800	KHK	Glycogene	false
107979	SLC35F2	Glycogene	false
106845	CBFA2T3	TF	false
105841	HS3ST3B1	Glycogene	false
105739	CBFB	TF	false
106012	ALG5	Glycogene	false
105741	CBX3	TF	false
107980	PIGX	Glycogene	false
105752	CBX8	TF	false
105744	RFNG	Glycogene	false
106848	CDK12	TF	false
105998	GANAB	Glycogene	false
105689	NEU3	Glycogene	false
105756	CDK8	TF	false
105966	UGGT2	Glycogene	false
105692	COG5	Glycogene	false
107981	LAMP1	Glycogene	false
107982	CDX2	TF	false
106005	COG1	Glycogene	false
105764	CEBPA	TF	false
107983	B3GNT8	Glycogene	false
105767	CEBPB	TF	false
107984	CTSA	Glycogene	false
105769	CHD1	TF	false
105770	CHD2	TF	false
105772	NDST2	Glycogene	false
105773	CHD4	TF	false
105775	CIITA	TF	false
105776	LAMP3	Glycogene	false
105768	A4GALT	Glycogene	false
106849	CLOCK	TF	false
105780	CPSF3L	TF	false
105781	B3GALT6	Glycogene	false
105754	B3GAT3	Glycogene	false
105783	POMGNT1	Glycogene	false
105790	CREBBP	TF	false
105807	CHST3	Glycogene	false
105793	CTBP1	TF	false
105794	CTNNB1	TF	false
105851	GLCE	Glycogene	false
106850	DCP1A	TF	false
105688	STT3B	Glycogene	false
107985	DICER1	TF	false
106868	MGAT2	Glycogene	false
105796	E2F1	TF	false
105797	ALG3	Glycogene	false
105758	DPM2	Glycogene	false
107986	SLC35C2	Glycogene	false
107987	E2F4	TF	false
106892	COG4	Glycogene	false
105801	E2F6	TF	false
105803	E2F7	TF	false
105711	ALG10	Glycogene	false
106893	STT3A	Glycogene	false
107285	EED	TF	false
107286	ALG8	Glycogene	false
105878	DPAGT1	Glycogene	false
105821	EHMT2	TF	false
105822	ELF1	TF	false
105823	COG3	Glycogene	false
107281	SLC35B3	Glycogene	false
107300	ALG11	Glycogene	false
105829	EP400	TF	false
105830	ERCC6	TF	false
107295	FOSL2	TF	false
105850	FOXA1	TF	false
105855	GNPNAT1	Glycogene	false
107988	FOXD2	TF	false
105856	FOXO1	TF	false
105824	COG6	Glycogene	false
105979	SULF2	Glycogene	false
105858	FOXP3	TF	false
105840	ST8SIA1	Glycogene	false
106857	ST3GAL5	Glycogene	false
106853	MAN1C1	Glycogene	false
107989	ST6GALNAC5	Glycogene	false
105857	DSEL	Glycogene	false
105765	NAGK	Glycogene	false
107990	B4GALNT1	Glycogene	false
105861	GABPA	TF	false
106835	PIGK	Glycogene	false
106863	GAPDH	TF	false
106864	GPI	Glycogene	false
105863	GATAD1	TF	false
107991	GLI1	TF	false
106883	SULF1	Glycogene	false
105719	GFPT2	Glycogene	false
105868	GTF2B	TF	false
107992	ALG14	Glycogene	false
105869	CTBS	Glycogene	false
105976	FPGT	Glycogene	false
107332	PIGY	Glycogene	false
105871	GTF2I	TF	false
105872	H2AFX	TF	false
105873	HCFC1	TF	false
106891	COG8	Glycogene	false
107304	HDAC3	TF	false
107305	GNPDA1	Glycogene	false
107993	HEYL	TF	false
107994	HNF1B	TF	false
107995	HNF4A	TF	false
105918	MGAT4B	Glycogene	false
106855	ST6GAL1	Glycogene	false
107996	HS6ST1	Glycogene	false
105879	HSF1	TF	false
105885	INO80	TF	false
105717	CHSY1	Glycogene	false
105887	IRF1	TF	false
106872	IRF3	TF	false
105759	PIGQ	Glycogene	false
105888	IRF4	TF	false
105766	MFNG	Glycogene	false
106861	CHST15	Glycogene	false
105746	ST6GALNAC6	Glycogene	false
105694	MAN2A1	Glycogene	false
107311	JARID2	TF	false
105892	JMJD1C	TF	false
105922	IDS	Glycogene	false
106854	XYLT1	Glycogene	false
105894	JMJD6	TF	false
105798	SLC35B1	Glycogene	false
107313	KDM2B	TF	false
107997	KDM4C	TF	false
105713	FKTN	Glycogene	false
105874	PIGO	Glycogene	false
105904	KDM5A	TF	false
105905	GNS	Glycogene	false
105907	KDM5B	TF	false
107998	ST3GAL4	Glycogene	false
107315	KDM6B	TF	false
107317	KLF4	TF	false
105691	ACER2	Glycogene	false
105820	UAP1	Glycogene	false
107297	GNE	Glycogene	false
105695	SLC35A3	Glycogene	false
105707	B3GNT5	Glycogene	false
107999	B3GNT6	Glycogene	false
105920	ST6GALNAC1	Glycogene	false
107352	B4GALNT2	Glycogene	false
106000	HPSE	Glycogene	false
108000	GALNT3	Glycogene	false
108001	SLC35A1	Glycogene	false
106859	GALNT7	Glycogene	false
105751	HYAL1	Glycogene	false
108002	NANS	Glycogene	false
108003	GCNT3	Glycogene	false
108004	B3GNT7	Glycogene	false
108005	SLC17A5	Glycogene	false
107318	KLF5	TF	false
106875	LEF1	TF	false
105833	CHSY3	Glycogene	false
105809	TPST1	Glycogene	false
105927	SLC35F1	Glycogene	false
108006	MAFK	TF	false
107327	POFUT2	Glycogene	false
108007	CHPF2	Glycogene	false
105915	MAX	TF	false
105852	PIGH	Glycogene	false
108008	DAD1	Glycogene	false
105916	MAZ	TF	false
107322	MBD2	TF	false
105730	PIGN	Glycogene	false
107323	MBD3	TF	false
105924	MED1	TF	false
107324	MED12	TF	false
106878	MEIS3	TF	false
105931	MRE11A	TF	false
105933	MXD3	TF	false
105935	MYBL2	TF	false
108009	MYC	TF	false
105937	MYH11	TF	false
108010	CHST1	Glycogene	false
108011	CHST8	Glycogene	false
108012	ST8SIA3	Glycogene	false
108013	CHST10	Glycogene	false
108014	MGAT5B	Glycogene	false
106887	EXTL1	Glycogene	false
105942	MZF1	TF	false
105896	FKRP	Glycogene	false
107326	NCOR2	TF	false
108015	B4GALNT3	Glycogene	false
107329	NFYA	TF	false
105954	PIGM	Glycogene	false
105947	NIPBL	TF	false
108016	NOTCH1	TF	false
105948	NPAT	TF	false
105949	NR2C2	TF	false
105771	OGT	Glycogene	false
108017	NR2F2	TF	false
105843	ARSB	Glycogene	false
108018	CHST14	Glycogene	false
108019	PDX1	TF	false
105956	PHF20	TF	false
107334	PHF8	TF	false
107335	SLC35A2	Glycogene	false
107350	LAMP2	Glycogene	false
106032	C1GALT1C1	Glycogene	false
105958	PIAS1	TF	false
108020	PIGB	Glycogene	false
105959	POLR2B	TF	false
105960	POLR3A	TF	false
105962	PRDM1	TF	false
107274	B4GALT1	Glycogene	false
108021	PRDM4	TF	false
105965	RB1	TF	false
105967	RBBP5	TF	false
105731	FAM20B	Glycogene	false
108022	RBL1	TF	false
105968	RBL2	TF	false
105969	RCOR1	TF	false
108023	POMT2	Glycogene	false
108024	RELA	TF	false
105970	REST	TF	false
105974	RFX7	TF	false
105975	RNF2	TF	false
105978	RUNX1	TF	false
105805	CSGALNACT1	Glycogene	false
105981	RUNX2	TF	false
105982	RUNX3	TF	false
107338	RYBP	TF	false
108025	SCML2	TF	false
105845	SLC35B4	Glycogene	false
108026	GLA	Glycogene	false
107339	SETDB1	TF	false
105749	IDUA	Glycogene	false
107341	SMAD1	TF	false
107344	SMARCC1	TF	false
105989	SMC1A	TF	false
108027	PIGA	Glycogene	false
105993	SPDEF	TF	false
108028	SRC	TF	false
105995	SREBF2	TF	false
105999	STAT1	TF	false
105883	GM2A	Glycogene	false
105860	NPL	Glycogene	false
107347	STAT3	TF	false
108029	STAT5B	TF	false
106004	SUMO2	TF	false
107349	SVIL	TF	false
106006	TAF1	TF	false
105864	ALG13	Glycogene	false
107351	TAF3	TF	false
108030	TBP	TF	false
106007	TCF12	TF	false
108031	TCF21	TF	false
108032	B3GNT9	Glycogene	false
108033	HS3ST3A1	Glycogene	false
106008	TCF7	TF	false
106010	TCF7L2	TF	false
108034	B3GALT5	Glycogene	false
106011	TDRD3	TF	false
106013	TEAD1	TF	false
108035	TEAD4	TF	false
108036	TFDP1	TF	false
106890	THAP11	TF	false
106018	TRIM28	TF	false
106019	TTF2	TF	false
106879	ALG6	Glycogene	false
106024	WDR5	TF	false
108037	XBP1	TF	false
108038	GMPPB	Glycogene	false
106026	YAP1	TF	false
106028	YY1	TF	false
108039	ZBTB2	TF	false
106031	ZBTB33	TF	false
