# Supplementary material for: A systems-based framework to computationally describe putative transcription factors and signaling pathways regulating glycan biosynthesis
Source: publisher site journal article supplement (doi:10.3762/bjoc.17.119), 2021-07-22
Supplement: Additional file 2 [file 1860-5397-17-119-S2.cys › CytoscapeSession-2021_03_21-12_01/tables/109659-HNSC/LOCAL_ATTRS-org.cytoscape.model.CyNode-HNSC+default+node.cytable]

CyCSV-Version	1
SUID	name	nodeType	selected
java.lang.Long	java.lang.String	java.lang.String	java.lang.Boolean
		mutable
HNSC default node
105684	ADNP	TF	false
105685	FUT7	Glycogene	false
105686	AFF4	TF	false
105687	MAN1A2	Glycogene	false
105688	STT3B	Glycogene	false
105689	NEU3	Glycogene	false
105690	FUT11	Glycogene	false
105694	MAN2A1	Glycogene	false
105691	ACER2	Glycogene	false
105692	COG5	Glycogene	false
105985	UGCG	Glycogene	false
105697	GALNT10	Glycogene	false
105950	SLC35D1	Glycogene	false
105717	CHSY1	Glycogene	false
106836	AHR	TF	false
105703	GALNT4	Glycogene	false
105731	FAM20B	Glycogene	false
105701	ATF1	TF	false
105702	SLC35A5	Glycogene	false
105695	SLC35A3	Glycogene	false
105732	SLC35E3	Glycogene	false
105906	HS2ST1	Glycogene	false
105851	GLCE	Glycogene	false
106868	MGAT2	Glycogene	false
106882	GFPT1	Glycogene	false
108550	ATF4	TF	false
105735	PMM1	Glycogene	false
105710	ATF7IP	TF	false
105711	ALG10	Glycogene	false
107973	AUTS2	TF	false
105713	FKTN	Glycogene	false
105714	BACH1	TF	false
106858	GCNT4	Glycogene	false
105721	BATF	TF	false
106856	FUCA1	Glycogene	false
105776	LAMP3	Glycogene	false
105724	MGAT1	Glycogene	false
105834	ST8SIA4	Glycogene	false
107310	NAAA	Glycogene	false
106860	MGAT4A	Glycogene	false
105897	GBGT1	Glycogene	false
106855	ST6GAL1	Glycogene	false
105723	BATF3	TF	false
105859	HK3	Glycogene	false
105725	BCAT1	TF	false
105806	ST3GAL2	Glycogene	false
105810	FUT4	Glycogene	false
107275	BCL6	TF	false
105748	MAN2A2	Glycogene	false
108015	B4GALNT3	Glycogene	false
105812	GALNT12	Glycogene	false
105728	BRCA1	TF	false
105729	PIGW	Glycogene	false
105705	UGGT1	Glycogene	false
105727	ALG10B	Glycogene	false
105700	RTF1	Glycogene	false
105733	BRD1	TF	false
105734	ALG12	Glycogene	false
106843	BRD4	TF	false
106844	SLC35E1	Glycogene	false
105908	B3GALNT2	Glycogene	false
105792	POFUT1	Glycogene	false
105736	C17orf49	TF	false
105754	B3GAT3	Glycogene	false
105738	CASP8AP2	TF	false
105845	SLC35B4	Glycogene	false
105739	CBFB	TF	false
107279	B4GALT5	Glycogene	false
109669	UXS1	Glycogene	false
105741	CBX3	TF	false
105799	DPM1	Glycogene	false
109670	C1GALT1	Glycogene	false
105798	SLC35B1	Glycogene	false
105762	MOGS	Glycogene	false
106847	CBX6	TF	false
105805	CSGALNACT1	Glycogene	false
105998	GANAB	Glycogene	false
105930	CHST6	Glycogene	false
106848	CDK12	TF	false
105756	CDK8	TF	false
105823	COG3	Glycogene	false
105824	COG6	Glycogene	false
105779	DSE	Glycogene	false
105757	CDK9	TF	false
105758	DPM2	Glycogene	false
105760	MAN1B1	Glycogene	false
108002	NANS	Glycogene	false
109671	ALG2	Glycogene	false
105764	CEBPA	TF	false
109672	NEU2	Glycogene	false
105767	CEBPB	TF	false
108564	CEBPZ	TF	false
106893	STT3A	Glycogene	false
105769	CHD1	TF	false
105770	CHD2	TF	false
105771	OGT	Glycogene	false
105773	CHD4	TF	false
106005	COG1	Glycogene	false
105774	CHD8	TF	false
105775	CIITA	TF	false
105716	MAN1A1	Glycogene	false
108586	SLC35A4	Glycogene	false
105780	CPSF3L	TF	false
105781	B3GALT6	Glycogene	false
105744	RFNG	Glycogene	false
105759	PIGQ	Glycogene	false
105880	TSTA3	Glycogene	false
105782	B4GALT7	Glycogene	false
105917	B4GALT2	Glycogene	false
105787	GMPPA	Glycogene	false
105785	CREB1	TF	false
105790	CREBBP	TF	false
107278	FUT10	Glycogene	false
105807	CHST3	Glycogene	false
105954	PIGM	Glycogene	false
105905	GNS	Glycogene	false
105795	DEK	TF	false
108000	GALNT3	Glycogene	false
105796	E2F1	TF	false
105797	ALG3	Glycogene	false
107986	SLC35C2	Glycogene	false
105936	RPN1	Glycogene	false
107284	E2F3	TF	false
105966	UGGT2	Glycogene	false
107987	E2F4	TF	false
106892	COG4	Glycogene	false
105803	E2F7	TF	false
105804	EBF1	TF	false
105815	ST6GALNAC3	Glycogene	false
107328	PAPSS2	Glycogene	false
106887	EXTL1	Glycogene	false
105884	LIPA	Glycogene	false
106861	CHST15	Glycogene	false
109673	SMPD1	Glycogene	false
107976	FUT8	Glycogene	false
106853	MAN1C1	Glycogene	false
105737	HYAL2	Glycogene	false
108567	NAGA	Glycogene	false
108018	CHST14	Glycogene	false
107989	ST6GALNAC5	Glycogene	false
109674	HS3ST2	Glycogene	false
108576	EBNA1BP2	TF	false
107285	EED	TF	false
108554	ALG9	Glycogene	false
105816	EGR2	TF	false
105719	GFPT2	Glycogene	false
106883	SULF1	Glycogene	false
105843	ARSB	Glycogene	false
105840	ST8SIA1	Glycogene	false
105720	ST6GAL2	Glycogene	false
105819	EHF	TF	false
107287	FUT2	Glycogene	false
105920	ST6GALNAC1	Glycogene	false
106000	HPSE	Glycogene	false
105822	ELF1	TF	false
105826	ELK3	TF	false
105827	ELK4	TF	false
108551	UGDH	Glycogene	false
105829	EP400	TF	false
105830	ERCC6	TF	false
105831	ERF	TF	false
105832	ERG	TF	false
105833	CHSY3	Glycogene	false
105715	CSGALNACT2	Glycogene	false
105837	SULT1C4	Glycogene	false
109675	GLB1	Glycogene	false
105839	ETS1	TF	false
105718	CHST11	Glycogene	false
106854	XYLT1	Glycogene	false
106857	ST3GAL5	Glycogene	false
105893	MGAT5	Glycogene	false
105841	HS3ST3B1	Glycogene	false
105979	SULF2	Glycogene	false
107274	B4GALT1	Glycogene	false
107307	EXT2	Glycogene	false
108580	EXT1	Glycogene	false
107306	GALNT2	Glycogene	false
108582	EZH2	TF	false
105847	FANCD2	TF	false
105848	FLI1	TF	false
105766	MFNG	Glycogene	false
108600	STS	Glycogene	false
105913	CHST13	Glycogene	false
107295	FOSL2	TF	false
105850	FOXA1	TF	false
107296	GCNT2	Glycogene	false
107999	B3GNT6	Glycogene	false
108003	GCNT3	Glycogene	false
107289	FUT3	Glycogene	false
109676	UGT1A7	Glycogene	false
107298	FOXK1	TF	false
105853	FOXM1	TF	false
105855	GNPNAT1	Glycogene	false
105867	ALG1	Glycogene	false
105856	FOXO1	TF	false
105857	DSEL	Glycogene	false
108579	ST3GAL1	Glycogene	false
108005	SLC17A5	Glycogene	false
105777	MAN2B1	Glycogene	false
108587	FOXO3	TF	false
105858	FOXP3	TF	false
105912	RENBP	Glycogene	false
106863	GAPDH	TF	false
106864	GPI	Glycogene	false
109677	GATA3	TF	false
109678	GLIS1	TF	false
106866	GRHL1	TF	false
105730	PIGN	Glycogene	false
107301	GRHL2	TF	false
105868	GTF2B	TF	false
107992	ALG14	Glycogene	false
107302	GTF3C2	TF	false
105872	H2AFX	TF	false
105878	DPAGT1	Glycogene	false
105873	HCFC1	TF	false
105874	PIGO	Glycogene	false
107303	HDAC1	TF	false
106879	ALG6	Glycogene	false
108592	HDAC2	TF	false
108001	SLC35A1	Glycogene	false
107304	HDAC3	TF	false
107305	GNPDA1	Glycogene	false
105875	HECTD1	TF	false
105876	HES4	TF	false
108566	B3GNT4	Glycogene	false
109679	HEY1	TF	false
105835	CHST7	Glycogene	false
105844	EXTL2	Glycogene	false
105809	TPST1	Glycogene	false
107327	POFUT2	Glycogene	false
108013	CHST10	Glycogene	false
107998	ST3GAL4	Glycogene	false
105784	B4GALNT4	Glycogene	false
109680	NAGLU	Glycogene	false
107993	HEYL	TF	false
108007	CHPF2	Glycogene	false
106867	HIF1A	TF	false
106838	B3GNT2	Glycogene	false
105879	HSF1	TF	false
105881	GPAA1	Glycogene	false
105747	ST3GAL3	Glycogene	false
105882	IKZF1	TF	false
105772	NDST2	Glycogene	false
105698	ST8SIA6	Glycogene	false
108004	B3GNT7	Glycogene	false
105885	INO80	TF	false
105887	IRF1	TF	false
108552	GCNT1	Glycogene	false
106871	IRF2	TF	false
106872	IRF3	TF	false
105783	POMGNT1	Glycogene	false
105722	DPM3	Glycogene	false
105888	IRF4	TF	false
105890	IRF8	TF	false
105892	JMJD1C	TF	false
105894	JMJD6	TF	false
105901	KDM1A	TF	false
108555	DDOST	Glycogene	false
105902	GNB1	Glycogene	false
107313	KDM2B	TF	false
105903	KDM3A	TF	false
105904	KDM5A	TF	false
105907	KDM5B	TF	false
107314	KDM5C	TF	false
107316	KLF11	TF	false
107317	KLF4	TF	false
107318	KLF5	TF	false
107321	LIN9	TF	false
109681	LMNB1	TF	false
108598	MAFF	TF	false
107322	MBD2	TF	false
107323	MBD3	TF	false
105924	MED1	TF	false
105925	MEF2A	TF	false
105926	MEF2C	TF	false
105927	SLC35F1	Glycogene	false
105818	B3GALT1	Glycogene	false
105808	B3GALT2	Glycogene	false
109682	ST8SIA5	Glycogene	false
105980	ST8SIA2	Glycogene	false
106878	MEIS3	TF	false
105931	MRE11A	TF	false
109683	MXD1	TF	false
107983	B3GNT8	Glycogene	false
105934	MYBL1	TF	false
105935	MYBL2	TF	false
105854	RPN2	Glycogene	false
108009	MYC	TF	false
107326	NCOR2	TF	false
109684	XYLT2	Glycogene	false
105944	NFATC1	TF	false
105945	NFIC	TF	false
105947	NIPBL	TF	false
108016	NOTCH1	TF	false
105948	NPAT	TF	false
109685	NR1H2	TF	false
105749	IDUA	Glycogene	false
105955	PCGF1	TF	false
108557	PIGF	Glycogene	false
105958	PIAS1	TF	false
107336	PML	TF	false
105959	POLR2B	TF	false
105973	COG2	Glycogene	false
105960	POLR3A	TF	false
106881	PPARA	TF	false
105962	PRDM1	TF	false
105965	RB1	TF	false
105967	RBBP5	TF	false
108022	RBL1	TF	false
105969	RCOR1	TF	false
108024	RELA	TF	false
105970	REST	TF	false
108611	RFX2	TF	false
105974	RFX7	TF	false
108613	RING1	TF	false
108008	DAD1	Glycogene	false
107337	RLF	TF	false
105975	RNF2	TF	false
105696	SLC35F5	Glycogene	false
105978	RUNX1	TF	false
105981	RUNX2	TF	false
105982	RUNX3	TF	false
108616	SFPQ	TF	false
106885	SIRT6	TF	false
105986	SIX5	TF	false
108023	POMT2	Glycogene	false
107341	SMAD1	TF	false
107291	PAPSS1	Glycogene	false
107343	SMARCA4	TF	false
108617	SMARCB1	TF	false
108572	SLC35B2	Glycogene	false
105989	SMC1A	TF	false
105990	SMC3	TF	false
109686	SNAI2	TF	false
105709	HAS2	Glycogene	false
106835	PIGK	Glycogene	false
108032	B3GNT9	Glycogene	false
108618	SNAPC1	TF	false
107345	SOX2	TF	false
109687	UGT1A9	Glycogene	false
109688	UGT1A3	Glycogene	false
108621	SOX9	TF	false
108028	SRC	TF	false
109689	PIGG	Glycogene	false
105994	SRCAP	TF	false
105791	COG7	Glycogene	false
105996	SRF	TF	false
105997	SSRP1	TF	false
107286	ALG8	Glycogene	false
106891	COG8	Glycogene	false
105999	STAT1	TF	false
106001	STAT2	TF	false
107347	STAT3	TF	false
107290	ASAH1	Glycogene	false
106002	STAT4	TF	false
108585	HEXB	Glycogene	false
106003	STAT5A	TF	false
107349	SVIL	TF	false
108030	TBP	TF	false
107281	SLC35B3	Glycogene	false
105789	B4GALT3	Glycogene	false
106008	TCF7	TF	false
106009	TCF7L1	TF	false
105740	GALNS	Glycogene	false
106013	TEAD1	TF	false
106027	GALNT5	Glycogene	false
107331	B4GALT6	Glycogene	false
109690	TEAD2	TF	false
105763	CHST12	Glycogene	false
106840	TPST2	Glycogene	false
106016	TET2	TF	false
109691	TGIF1	TF	false
106890	THAP11	TF	false
105800	KHK	Glycogene	false
106017	TP63	TF	false
106018	TRIM28	TF	false
106019	TTF2	TF	false
108629	UBE2I	TF	false
107356	VDR	TF	false
105923	NDST1	Glycogene	false
106024	WDR5	TF	false
105761	POMT1	Glycogene	false
109692	WRNIP1	TF	false
106025	XRN2	TF	false
107979	SLC35F2	Glycogene	false
106026	YAP1	TF	false
106028	YY1	TF	false
105852	PIGH	Glycogene	false
106029	ZBTB17	TF	false
108039	ZBTB2	TF	false
106031	ZBTB33	TF	false
106032	C1GALT1C1	Glycogene	false
107350	LAMP2	Glycogene	false
