# Supplementary material for: A systems-based framework to computationally describe putative transcription factors and signaling pathways regulating glycan biosynthesis
Source: publisher site journal article supplement (doi:10.3762/bjoc.17.119), 2021-07-22
Supplement: Additional file 2 [file 1860-5397-17-119-S2.cys › CytoscapeSession-2021_03_21-12_01/tables/110777-KICH/LOCAL_ATTRS-org.cytoscape.model.CyEdge-KICH+default+edge.cytable]

CyCSV-Version	1
SUID	interaction	name	selected
java.lang.Long	java.lang.String	java.lang.String	java.lang.Boolean
KICH default edge
110816	interacts with	AEBP2 (interacts with) FAM20B	false
110817	interacts with	AFF4 (interacts with) MAN1A2	false
110818	interacts with	AFF4 (interacts with) STT3B	false
110819	interacts with	AFF4 (interacts with) MAN2A1	false
110820	interacts with	AFF4 (interacts with) COG5	false
110821	interacts with	AFF4 (interacts with) UGGT1	false
110822	interacts with	AFF4 (interacts with) SLC35A3	false
110823	interacts with	AFF4 (interacts with) ALG10	false
110824	interacts with	AFF4 (interacts with) SLC35A5	false
110825	interacts with	AFF4 (interacts with) HS2ST1	false
110826	interacts with	AFF4 (interacts with) PIGK	false
110827	interacts with	ATF1 (interacts with) SLC35A5	false
110828	interacts with	ATF1 (interacts with) SLC35A3	false
110829	interacts with	ATF2 (interacts with) MAN1A2	false
110830	interacts with	ATF2 (interacts with) MAN2A1	false
110831	interacts with	ATF2 (interacts with) UGGT1	false
110832	interacts with	ATF2 (interacts with) COG5	false
110833	interacts with	ATF2 (interacts with) SLC35A3	false
110834	interacts with	ATF2 (interacts with) COG6	false
110835	interacts with	ATF2 (interacts with) GNS	false
110836	interacts with	ATF2 (interacts with) SLC35E3	false
110837	interacts with	ATF2 (interacts with) PIGK	false
110838	interacts with	ATF2 (interacts with) FPGT	false
110839	interacts with	ATF7IP (interacts with) ALG10	false
110840	interacts with	ATRX (interacts with) SLC35A3	false
110841	interacts with	ATRX (interacts with) PIGK	false
110842	interacts with	BARX2 (interacts with) DPAGT1	false
110843	interacts with	BARX2 (interacts with) SLC35B1	false
110844	interacts with	BCOR (interacts with) PIGO	false
110845	interacts with	BCOR (interacts with) COG8	false
110846	interacts with	BCOR (interacts with) GCNT1	false
110847	interacts with	BCOR (interacts with) FUT10	false
110848	interacts with	BMI1 (interacts with) CSGALNACT2	false
110849	interacts with	BMI1 (interacts with) PIGK	false
110850	interacts with	BRD7 (interacts with) GNPNAT1	false
110851	interacts with	BTAF1 (interacts with) ALG10	false
110852	interacts with	CARM1 (interacts with) DPM2	false
110853	interacts with	CARM1 (interacts with) MPI	false
110854	interacts with	CBX6 (interacts with) ALG10	false
110855	interacts with	CBX6 (interacts with) PIGG	false
110856	interacts with	CBX6 (interacts with) CSGALNACT1	false
110857	interacts with	CBX6 (interacts with) COG8	false
110858	interacts with	CCDC101 (interacts with) B3GAT3	false
110859	interacts with	CDK8 (interacts with) SLC35E3	false
110860	interacts with	CDK8 (interacts with) UGP2	false
110861	interacts with	CDK8 (interacts with) FPGT	false
110862	interacts with	CDK9 (interacts with) DPM2	false
110863	interacts with	CDK9 (interacts with) MAN1B1	false
110864	interacts with	CDK9 (interacts with) ALG3	false
110865	interacts with	CEBPG (interacts with) SLC35B1	false
110866	interacts with	CHD4 (interacts with) SLC35E3	false
110867	interacts with	CPSF3L (interacts with) TSTA3	false
110868	interacts with	CPSF3L (interacts with) DPM3	false
110869	interacts with	CREB3 (interacts with) ALG2	false
110870	interacts with	CSNK2A1 (interacts with) SLC35E3	false
110871	interacts with	CSNK2A1 (interacts with) C1GALT1C1	false
110872	interacts with	CSNK2A1 (interacts with) STT3B	false
110873	interacts with	CTBP1 (interacts with) B3GAT3	false
110874	interacts with	CTBP1 (interacts with) CHST12	false
110875	interacts with	DBP (interacts with) SLC35A4	false
110876	interacts with	DCP1A (interacts with) STT3B	false
110877	interacts with	DCP1A (interacts with) UAP1	false
110878	interacts with	DDIT3 (interacts with) SLC35B1	false
110879	interacts with	DICER1 (interacts with) FUT10	false
110880	interacts with	DOT1L (interacts with) POMT2	false
110881	interacts with	E2F4 (interacts with) PIGQ	false
110882	interacts with	E2F8 (interacts with) PIGO	false
110883	interacts with	E2F8 (interacts with) NANS	false
110884	interacts with	EGLN2 (interacts with) HYAL2	false
110885	interacts with	ELF2 (interacts with) ALG10B	false
110886	interacts with	ERF (interacts with) CHST12	false
110887	interacts with	ERG (interacts with) MFNG	false
110888	interacts with	ERG (interacts with) ST8SIA4	false
110889	interacts with	ERG (interacts with) CHST15	false
110890	interacts with	ESRRA (interacts with) B3GAT3	false
110891	interacts with	FLI1 (interacts with) MFNG	false
110892	interacts with	FLI1 (interacts with) ST8SIA4	false
110893	interacts with	FLI1 (interacts with) CHST15	false
110894	interacts with	GAPDH (interacts with) GPI	false
110895	interacts with	GLYR1 (interacts with) COG7	false
110896	interacts with	GLYR1 (interacts with) ALG1	false
110897	interacts with	GLYR1 (interacts with) B4GALNT3	false
110898	interacts with	GMEB2 (interacts with) HYAL2	false
110899	interacts with	GMEB2 (interacts with) MPI	false
110900	interacts with	GPS2 (interacts with) NAGK	false
110901	interacts with	GTF2I (interacts with) COG5	false
110902	interacts with	GTF2I (interacts with) UGGT1	false
110903	interacts with	GTF2I (interacts with) SLC35A3	false
110904	interacts with	GTF2I (interacts with) ALG10	false
110905	interacts with	GTF2I (interacts with) SLC35E3	false
110906	interacts with	GTF3C1 (interacts with) COG8	false
110907	interacts with	GTF3C1 (interacts with) PIGQ	false
110908	interacts with	GTF3C1 (interacts with) SLC35A2	false
110909	interacts with	HBP1 (interacts with) ALG10	false
110910	interacts with	HECTD1 (interacts with) FAM20B	false
110911	interacts with	HIF1A (interacts with) STT3B	false
110912	interacts with	HIF1A (interacts with) SLC35A3	false
110913	interacts with	HIF1A (interacts with) COG6	false
110914	interacts with	HIF1A (interacts with) ALG10	false
110915	interacts with	HINFP (interacts with) MOGS	false
110916	interacts with	HINFP (interacts with) B3GAT3	false
110917	interacts with	HOXA10 (interacts with) POMT2	false
110918	interacts with	HOXA7 (interacts with) POMT2	false
110919	interacts with	HOXB4 (interacts with) PIGL	false
110920	interacts with	HOXB4 (interacts with) PIGO	false
110921	interacts with	HSF1 (interacts with) TSTA3	false
110922	interacts with	INO80 (interacts with) RTF1	false
110923	interacts with	INO80 (interacts with) GANAB	false
110924	interacts with	INO80 (interacts with) COG5	false
110925	interacts with	INO80 (interacts with) GALNT9	false
110926	interacts with	JMJD1C (interacts with) FUT11	false
110927	interacts with	JMJD1C (interacts with) CSGALNACT2	false
110928	interacts with	KAT2B (interacts with) SLC35A3	false
110929	interacts with	KAT2B (interacts with) FPGT	false
110930	interacts with	KAT2B (interacts with) COG6	false
110931	interacts with	KAT2B (interacts with) UGGT1	false
110932	interacts with	KDM5A (interacts with) ALG10	false
110933	interacts with	KDM5A (interacts with) ALG10B	false
110934	interacts with	KDM5A (interacts with) MAN2A1	false
110935	interacts with	KDM5A (interacts with) UGGT1	false
110936	interacts with	KDM5A (interacts with) SLC35A3	false
110937	interacts with	KDM5A (interacts with) COG5	false
110938	interacts with	LARP7 (interacts with) STT3B	false
110939	interacts with	LDB1 (interacts with) ST3GAL2	false
110940	interacts with	LDB1 (interacts with) PIGQ	false
110941	interacts with	LMO2 (interacts with) MFNG	false
110942	interacts with	LMO2 (interacts with) LFNG	false
110943	interacts with	LYL1 (interacts with) MFNG	false
110944	interacts with	LYL1 (interacts with) LFNG	false
110945	interacts with	LYL1 (interacts with) HYAL2	false
110946	interacts with	MAFB (interacts with) NPL	false
110947	interacts with	MAFG (interacts with) GAA	false
110948	interacts with	MBD3 (interacts with) SLC35A4	false
110949	interacts with	MECOM (interacts with) ALG10B	false
110950	interacts with	MECOM (interacts with) RPN2	false
110951	interacts with	MLLT3 (interacts with) SLC35A3	false
110952	interacts with	MNT (interacts with) POMT2	false
110953	interacts with	MNT (interacts with) B4GALT2	false
110954	interacts with	MSX1 (interacts with) MFNG	false
110955	interacts with	MSX1 (interacts with) A4GALT	false
110956	interacts with	MSX1 (interacts with) MGAT3	false
110957	interacts with	MYBL1 (interacts with) FUT8	false
110958	interacts with	MYBL1 (interacts with) SLC35E1	false
110959	interacts with	MYBL1 (interacts with) SLC35A2	false
110960	interacts with	MYBL1 (interacts with) PIGO	false
110961	interacts with	MYBL1 (interacts with) DAD1	false
110962	interacts with	MYBL1 (interacts with) GPAA1	false
110963	interacts with	MYBL1 (interacts with) RPN2	false
110964	interacts with	MZF1 (interacts with) B3GNT9	false
110965	interacts with	NFAT5 (interacts with) STT3A	false
110966	interacts with	NFYC (interacts with) GALE	false
110967	interacts with	NFYC (interacts with) B3GALT6	false
110968	interacts with	NIPBL (interacts with) UGGT1	false
110969	interacts with	NIPBL (interacts with) MGAT5	false
110970	interacts with	NIPBL (interacts with) SLC35A5	false
110971	interacts with	NIPBL (interacts with) STT3B	false
110972	interacts with	NIPBL (interacts with) MAN2A1	false
110973	interacts with	NIPBL (interacts with) FPGT	false
110974	interacts with	NKX6-1 (interacts with) GNPNAT1	false
110975	interacts with	NKX6-1 (interacts with) GMPPB	false
110976	interacts with	NME2 (interacts with) DPM3	false
110977	interacts with	NME2 (interacts with) SGSH	false
110978	interacts with	NPAT (interacts with) GANAB	false
110979	interacts with	NPAT (interacts with) SLC35A3	false
110980	interacts with	NR0B2 (interacts with) SLC35B1	false
110981	interacts with	NR0B2 (interacts with) GALK2	false
110982	interacts with	NR1H3 (interacts with) SLC35C1	false
110983	interacts with	NR2C2 (interacts with) STT3B	false
110984	interacts with	PCGF2 (interacts with) GAL3ST3	false
110985	interacts with	PHF6 (interacts with) FAM20B	false
110986	interacts with	PIAS1 (interacts with) SLC35A5	false
110987	interacts with	PIAS4 (interacts with) XYLT2	false
110988	interacts with	POLR2B (interacts with) MAN1A2	false
110989	interacts with	POLR2B (interacts with) STT3B	false
110990	interacts with	POLR2B (interacts with) MAN2A1	false
110991	interacts with	POLR2B (interacts with) UGGT1	false
110992	interacts with	POLR2B (interacts with) COG5	false
110993	interacts with	POLR2B (interacts with) SLC35A3	false
110994	interacts with	POLR2B (interacts with) SLC35A5	false
110995	interacts with	POLR2B (interacts with) GNPNAT1	false
110996	interacts with	POLR2B (interacts with) FPGT	false
110997	interacts with	POLR2B (interacts with) LAMP2	false
110998	interacts with	POLR2B (interacts with) C1GALT1C1	false
110999	interacts with	POLR2B (interacts with) RPN2	false
111000	interacts with	PPARA (interacts with) STT3B	false
111001	interacts with	PPARGC1A (interacts with) PIGK	false
111002	interacts with	PSIP1 (interacts with) STT3B	false
111003	interacts with	RBBP5 (interacts with) MAN1A2	false
111004	interacts with	RBBP5 (interacts with) COG5	false
111005	interacts with	RBBP5 (interacts with) UGGT1	false
111006	interacts with	RBBP5 (interacts with) SLC35A3	false
111007	interacts with	RBBP5 (interacts with) UGCG	false
111008	interacts with	RBBP5 (interacts with) HS2ST1	false
111009	interacts with	RBBP5 (interacts with) FUT10	false
111010	interacts with	RBBP5 (interacts with) GNS	false
111011	interacts with	RBBP5 (interacts with) COG6	false
111012	interacts with	RBBP5 (interacts with) SLC35A5	false
111013	interacts with	RBBP5 (interacts with) PIGK	false
111014	interacts with	RBL2 (interacts with) ALG10B	false
111015	interacts with	RBL2 (interacts with) SLC35A5	false
111016	interacts with	RBL2 (interacts with) ALG10	false
111017	interacts with	RBL2 (interacts with) SLC35A3	false
111018	interacts with	RBL2 (interacts with) STT3B	false
111019	interacts with	RBL2 (interacts with) MAN1A2	false
111020	interacts with	RBL2 (interacts with) PIGK	false
111021	interacts with	RBL2 (interacts with) COG5	false
111022	interacts with	SATB1 (interacts with) STT3B	false
111023	interacts with	SATB1 (interacts with) RPN1	false
111024	interacts with	SATB1 (interacts with) MAN2A1	false
111025	interacts with	SATB1 (interacts with) GNPNAT1	false
111026	interacts with	SATB1 (interacts with) C1GALT1C1	false
111027	interacts with	SIRT6 (interacts with) DPM3	false
111028	interacts with	SIRT6 (interacts with) B3GALT6	false
111029	interacts with	SNAPC1 (interacts with) UGDH	false
111030	interacts with	SNAPC5 (interacts with) SLC35A5	false
111031	interacts with	SND1 (interacts with) SLC35A2	false
111032	interacts with	SND1 (interacts with) DAD1	false
111033	interacts with	SP2 (interacts with) MAN1A2	false
111034	interacts with	SP2 (interacts with) FUT10	false
111035	interacts with	SP4 (interacts with) GANAB	false
111036	interacts with	SRCAP (interacts with) COG7	false
111037	interacts with	SRCAP (interacts with) PIGG	false
111038	interacts with	SRCAP (interacts with) GCNT1	false
111039	interacts with	SRCAP (interacts with) B3GNT8	false
111040	interacts with	TAF1 (interacts with) MAN1A2	false
111041	interacts with	TAF1 (interacts with) COG5	false
111042	interacts with	TAF1 (interacts with) STT3B	false
111043	interacts with	TAF1 (interacts with) ALG10B	false
111044	interacts with	TAF1 (interacts with) FKTN	false
111045	interacts with	TAF1 (interacts with) SLC35A3	false
111046	interacts with	TAF1 (interacts with) ALG10	false
111047	interacts with	TAF1 (interacts with) GNPNAT1	false
111048	interacts with	TAF7 (interacts with) PIGO	false
111049	interacts with	TCF12 (interacts with) STT3B	false
111050	interacts with	TCF12 (interacts with) COG5	false
111051	interacts with	TCF12 (interacts with) UGGT1	false
111052	interacts with	TCF12 (interacts with) SLC35A5	false
111053	interacts with	TCF12 (interacts with) SLC35A3	false
111054	interacts with	TCF12 (interacts with) FPGT	false
111055	interacts with	TCF12 (interacts with) PIGK	false
111056	interacts with	TDRD3 (interacts with) COG6	false
111057	interacts with	TDRD3 (interacts with) ALG5	false
111058	interacts with	TDRD3 (interacts with) UGP2	false
111059	interacts with	TDRD3 (interacts with) SLC35E3	false
111060	interacts with	TFE3 (interacts with) GALNS	false
111061	interacts with	TFE3 (interacts with) DPAGT1	false
111062	interacts with	TOP1 (interacts with) PIGK	false
111063	interacts with	TOP2B (interacts with) MAN1A1	false
111064	interacts with	TOP2B (interacts with) UGGT2	false
111065	interacts with	TOP2B (interacts with) FPGT	false
111066	interacts with	TRRAP (interacts with) RTF1	false
111067	interacts with	TRRAP (interacts with) ALG10B	false
111068	interacts with	VEZF1 (interacts with) ALG10B	false
111069	interacts with	VEZF1 (interacts with) ALG10	false
111070	interacts with	VEZF1 (interacts with) SLC35A5	false
111071	interacts with	VEZF1 (interacts with) UGGT1	false
111072	interacts with	XRN2 (interacts with) GNPNAT1	false
111073	interacts with	YAP1 (interacts with) COG5	false
111074	interacts with	YAP1 (interacts with) SLC35A3	false
111075	interacts with	YAP1 (interacts with) SLC35A5	false
111076	interacts with	ZBTB10 (interacts with) ALG10	false
111077	interacts with	ZBTB17 (interacts with) RFNG	false
111078	interacts with	ZBTB17 (interacts with) B3GALT6	false
111079	interacts with	ZBTB17 (interacts with) DPM3	false
