# Supplementary material for: A systems-based framework to computationally describe putative transcription factors and signaling pathways regulating glycan biosynthesis
Source: publisher site journal article supplement (doi:10.3762/bjoc.17.119), 2021-07-22
Supplement: Additional file 2 [file 1860-5397-17-119-S2.cys › CytoscapeSession-2021_03_21-12_01/tables/110777-KICH/LOCAL_ATTRS-org.cytoscape.model.CyNode-KICH+default+node.cytable]

CyCSV-Version	1
SUID	name	nodeType	selected
java.lang.Long	java.lang.String	java.lang.String	java.lang.Boolean
		mutable
KICH default node
110787	AEBP2	TF	false
105731	FAM20B	Glycogene	false
105686	AFF4	TF	false
105687	MAN1A2	Glycogene	false
105688	STT3B	Glycogene	false
105694	MAN2A1	Glycogene	false
105692	COG5	Glycogene	false
105705	UGGT1	Glycogene	false
105695	SLC35A3	Glycogene	false
105711	ALG10	Glycogene	false
105702	SLC35A5	Glycogene	false
105906	HS2ST1	Glycogene	false
106835	PIGK	Glycogene	false
105701	ATF1	TF	false
105704	ATF2	TF	false
105824	COG6	Glycogene	false
105905	GNS	Glycogene	false
105732	SLC35E3	Glycogene	false
105976	FPGT	Glycogene	false
105710	ATF7IP	TF	false
105712	ATRX	TF	false
107975	BARX2	TF	false
105878	DPAGT1	Glycogene	false
105798	SLC35B1	Glycogene	false
110788	BCOR	TF	false
105874	PIGO	Glycogene	false
106891	COG8	Glycogene	false
108552	GCNT1	Glycogene	false
107278	FUT10	Glycogene	false
105726	BMI1	TF	false
105715	CSGALNACT2	Glycogene	false
107977	BRD7	TF	false
105855	GNPNAT1	Glycogene	false
110789	BTAF1	TF	false
110790	CARM1	TF	false
105758	DPM2	Glycogene	false
107340	MPI	Glycogene	false
106847	CBX6	TF	false
109689	PIGG	Glycogene	false
105805	CSGALNACT1	Glycogene	false
105755	CCDC101	TF	false
105754	B3GAT3	Glycogene	false
105756	CDK8	TF	false
108584	UGP2	Glycogene	false
105757	CDK9	TF	false
105760	MAN1B1	Glycogene	false
105797	ALG3	Glycogene	false
110791	CEBPG	TF	false
105773	CHD4	TF	false
105780	CPSF3L	TF	false
105880	TSTA3	Glycogene	false
105722	DPM3	Glycogene	false
105786	CREB3	TF	false
109671	ALG2	Glycogene	false
108568	CSNK2A1	TF	false
106032	C1GALT1C1	Glycogene	false
105793	CTBP1	TF	false
105763	CHST12	Glycogene	false
110792	DBP	TF	false
108586	SLC35A4	Glycogene	false
106850	DCP1A	TF	false
105820	UAP1	Glycogene	false
110793	DDIT3	TF	false
107985	DICER1	TF	false
108570	DOT1L	TF	false
108023	POMT2	Glycogene	false
107987	E2F4	TF	false
105759	PIGQ	Glycogene	false
108575	E2F8	TF	false
108002	NANS	Glycogene	false
105813	EGLN2	TF	false
105737	HYAL2	Glycogene	false
105825	ELF2	TF	false
105727	ALG10B	Glycogene	false
105831	ERF	TF	false
105832	ERG	TF	false
105766	MFNG	Glycogene	false
105834	ST8SIA4	Glycogene	false
106861	CHST15	Glycogene	false
110794	ESRRA	TF	false
105848	FLI1	TF	false
106863	GAPDH	TF	false
106864	GPI	Glycogene	false
105866	GLYR1	TF	false
105791	COG7	Glycogene	false
105867	ALG1	Glycogene	false
108015	B4GALNT3	Glycogene	false
108589	GMEB2	TF	false
106865	GPS2	TF	false
105765	NAGK	Glycogene	false
105871	GTF2I	TF	false
110795	GTF3C1	TF	false
107335	SLC35A2	Glycogene	false
108591	HBP1	TF	false
105875	HECTD1	TF	false
106867	HIF1A	TF	false
105877	HINFP	TF	false
105762	MOGS	Glycogene	false
110796	HOXA10	TF	false
110797	HOXA7	TF	false
106870	HOXB4	TF	false
108578	PIGL	Glycogene	false
105879	HSF1	TF	false
105885	INO80	TF	false
105700	RTF1	Glycogene	false
105998	GANAB	Glycogene	false
108605	GALNT9	Glycogene	false
105892	JMJD1C	TF	false
105690	FUT11	Glycogene	false
107312	KAT2B	TF	false
105904	KDM5A	TF	false
110798	LARP7	TF	false
107320	LDB1	TF	false
105806	ST3GAL2	Glycogene	false
105909	LMO2	TF	false
106846	LFNG	Glycogene	false
105911	LYL1	TF	false
105914	MAFB	TF	false
105860	NPL	Glycogene	false
110799	MAFG	TF	false
108560	GAA	Glycogene	false
107323	MBD3	TF	false
105919	MECOM	TF	false
105854	RPN2	Glycogene	false
110800	MLLT3	TF	false
110801	MNT	TF	false
105917	B4GALT2	Glycogene	false
105932	MSX1	TF	false
105768	A4GALT	Glycogene	false
105750	MGAT3	Glycogene	false
105934	MYBL1	TF	false
107976	FUT8	Glycogene	false
106844	SLC35E1	Glycogene	false
108008	DAD1	Glycogene	false
105881	GPAA1	Glycogene	false
105942	MZF1	TF	false
108032	B3GNT9	Glycogene	false
105943	NFAT5	TF	false
106893	STT3A	Glycogene	false
105946	NFYC	TF	false
108559	GALE	Glycogene	false
105781	B3GALT6	Glycogene	false
105947	NIPBL	TF	false
105893	MGAT5	Glycogene	false
110802	NKX6-1	TF	false
108038	GMPPB	Glycogene	false
110803	NME2	TF	false
110804	SGSH	Glycogene	false
105948	NPAT	TF	false
110805	NR0B2	TF	false
110806	GALK2	Glycogene	false
110807	NR1H3	TF	false
108588	SLC35C1	Glycogene	false
105949	NR2C2	TF	false
108608	PCGF2	TF	false
108590	GAL3ST3	Glycogene	false
105957	PHF6	TF	false
105958	PIAS1	TF	false
110808	PIAS4	TF	false
109684	XYLT2	Glycogene	false
105959	POLR2B	TF	false
107350	LAMP2	Glycogene	false
106881	PPARA	TF	false
110809	PPARGC1A	TF	false
110810	PSIP1	TF	false
105967	RBBP5	TF	false
105985	UGCG	Glycogene	false
105968	RBL2	TF	false
108614	SATB1	TF	false
105936	RPN1	Glycogene	false
106885	SIRT6	TF	false
108618	SNAPC1	TF	false
108551	UGDH	Glycogene	false
110811	SNAPC5	TF	false
110812	SND1	TF	false
107346	SP2	TF	false
110813	SP4	TF	false
105994	SRCAP	TF	false
107983	B3GNT8	Glycogene	false
106006	TAF1	TF	false
105713	FKTN	Glycogene	false
108623	TAF7	TF	false
106007	TCF12	TF	false
106011	TDRD3	TF	false
106012	ALG5	Glycogene	false
108625	TFE3	TF	false
105740	GALNS	Glycogene	false
110814	TOP1	TF	false
110815	TOP2B	TF	false
105716	MAN1A1	Glycogene	false
105966	UGGT2	Glycogene	false
108628	TRRAP	TF	false
106023	VEZF1	TF	false
106025	XRN2	TF	false
106026	YAP1	TF	false
106894	ZBTB10	TF	false
106029	ZBTB17	TF	false
105744	RFNG	Glycogene	false
