# Supplementary material for: A systems-based framework to computationally describe putative transcription factors and signaling pathways regulating glycan biosynthesis
Source: publisher site journal article supplement (doi:10.3762/bjoc.17.119), 2021-07-22
Supplement: Additional file 2 [file 1860-5397-17-119-S2.cys › CytoscapeSession-2021_03_21-12_01/tables/112204-KIRP/LOCAL_ATTRS-org.cytoscape.model.CyEdge-KIRP+default+edge.cytable]

CyCSV-Version	1
SUID	interaction	name	selected
java.lang.Long	java.lang.String	java.lang.String	java.lang.Boolean
KIRP default edge
112233	interacts with	AEBP2 (interacts with) FAM20B	false
112234	interacts with	AEBP2 (interacts with) COG5	false
112235	interacts with	AFF4 (interacts with) MAN1A2	false
112236	interacts with	AFF4 (interacts with) STT3B	false
112237	interacts with	AFF4 (interacts with) NEU3	false
112238	interacts with	AFF4 (interacts with) FUT11	false
112239	interacts with	AFF4 (interacts with) ACER2	false
112240	interacts with	AFF4 (interacts with) COG5	false
112241	interacts with	AFF4 (interacts with) UGCG	false
112242	interacts with	AFF4 (interacts with) GALNT10	false
112243	interacts with	AFF4 (interacts with) SLC35E1	false
112244	interacts with	AFF4 (interacts with) GANAB	false
112245	interacts with	AHR (interacts with) GALNT5	false
112246	interacts with	AHR (interacts with) GALNT4	false
112247	interacts with	AR (interacts with) MAN2A1	false
112248	interacts with	AR (interacts with) ACER2	false
112249	interacts with	AR (interacts with) FUT11	false
112250	interacts with	AR (interacts with) UGCG	false
112251	interacts with	AR (interacts with) COG5	false
112252	interacts with	AR (interacts with) MAN1A2	false
112253	interacts with	AR (interacts with) PIGO	false
112254	interacts with	AR (interacts with) FKTN	false
112255	interacts with	AR (interacts with) FUT10	false
112256	interacts with	AR (interacts with) GANAB	false
112257	interacts with	AR (interacts with) GALNT10	false
112258	interacts with	AR (interacts with) PIGK	false
112259	interacts with	AR (interacts with) B4GALT5	false
112260	interacts with	ARNT2 (interacts with) ALG10B	false
112261	interacts with	ARNTL (interacts with) PAPSS2	false
112262	interacts with	ASH2L (interacts with) FUT10	false
112263	interacts with	ASH2L (interacts with) COG6	false
112264	interacts with	ASH2L (interacts with) COG2	false
112265	interacts with	ASH2L (interacts with) SLC35A3	false
112266	interacts with	ASH2L (interacts with) GALK2	false
112267	interacts with	ASH2L (interacts with) FPGT	false
112268	interacts with	ASH2L (interacts with) SLC17A5	false
112269	interacts with	ASH2L (interacts with) SLC35E3	false
112270	interacts with	ASH2L (interacts with) MAN1A2	false
112271	interacts with	ASH2L (interacts with) PIGK	false
112272	interacts with	ASH2L (interacts with) MAN2A1	false
112273	interacts with	ASH2L (interacts with) PIGO	false
112274	interacts with	ASH2L (interacts with) B4GALT5	false
112275	interacts with	ATF2 (interacts with) MAN1A2	false
112276	interacts with	ATF2 (interacts with) MAN2A1	false
112277	interacts with	ATF2 (interacts with) FUT11	false
112278	interacts with	ATF2 (interacts with) SLC35F5	false
112279	interacts with	ATF2 (interacts with) ACER2	false
112280	interacts with	ATF2 (interacts with) FUT10	false
112281	interacts with	ATF2 (interacts with) GANAB	false
112282	interacts with	ATF2 (interacts with) UGDH	false
112283	interacts with	ATF2 (interacts with) PIGO	false
112284	interacts with	ATF5 (interacts with) MAN2B1	false
112285	interacts with	ATF7IP (interacts with) ALG10	false
112286	interacts with	ATF7IP (interacts with) FUT10	false
112287	interacts with	ATRX (interacts with) FKTN	false
112288	interacts with	ATRX (interacts with) FUT10	false
112289	interacts with	BACH1 (interacts with) CSGALNACT2	false
112290	interacts with	BACH1 (interacts with) UGCG	false
112291	interacts with	BACH1 (interacts with) MAN1A2	false
112292	interacts with	BACH1 (interacts with) FUT11	false
112293	interacts with	BACH1 (interacts with) MAN1A1	false
112294	interacts with	BACH1 (interacts with) ACER2	false
112295	interacts with	BACH1 (interacts with) NEU3	false
112296	interacts with	BACH1 (interacts with) COG5	false
112297	interacts with	BACH1 (interacts with) SLC35E1	false
112298	interacts with	BACH1 (interacts with) PAPSS1	false
112299	interacts with	BACH1 (interacts with) GANAB	false
112300	interacts with	BACH1 (interacts with) PIGO	false
112301	interacts with	BACH1 (interacts with) NDST2	false
112302	interacts with	BACH1 (interacts with) PIGN	false
112303	interacts with	BACH1 (interacts with) FUT10	false
112304	interacts with	BCL3 (interacts with) A4GALT	false
112305	interacts with	BHLHE40 (interacts with) CHST15	false
112306	interacts with	BRD1 (interacts with) MAN2A2	false
112307	interacts with	BRD1 (interacts with) NDST2	false
112308	interacts with	BRD1 (interacts with) COG3	false
112309	interacts with	BRD1 (interacts with) CHSY1	false
112310	interacts with	BRD1 (interacts with) IDUA	false
112311	interacts with	BRD1 (interacts with) MOGS	false
112312	interacts with	BRD3 (interacts with) RTF1	false
112313	interacts with	BRD3 (interacts with) STT3B	false
112314	interacts with	BRD3 (interacts with) FUT11	false
112315	interacts with	BRD3 (interacts with) NDST2	false
112316	interacts with	BRD3 (interacts with) ALG10	false
112317	interacts with	BRD3 (interacts with) B3GALNT2	false
112318	interacts with	BRD3 (interacts with) CHSY1	false
112319	interacts with	BRD7 (interacts with) DPM1	false
112320	interacts with	BTAF1 (interacts with) PIGL	false
112321	interacts with	C17orf49 (interacts with) B3GAT3	false
112322	interacts with	CAMTA2 (interacts with) SGSH	false
112323	interacts with	CBX3 (interacts with) C1GALT1	false
112324	interacts with	CBX3 (interacts with) PIGL	false
112325	interacts with	CBX6 (interacts with) UGGT1	false
112326	interacts with	CBX6 (interacts with) GANAB	false
112327	interacts with	CBX7 (interacts with) MGAT4A	false
112328	interacts with	CBX8 (interacts with) RFNG	false
112329	interacts with	CBX8 (interacts with) PIGQ	false
112330	interacts with	CCDC101 (interacts with) B3GAT3	false
112331	interacts with	CDK12 (interacts with) GANAB	false
112332	interacts with	CDK12 (interacts with) ACER2	false
112333	interacts with	CDK12 (interacts with) SLC35E1	false
112334	interacts with	CDK12 (interacts with) PIGM	false
112335	interacts with	CDK8 (interacts with) STT3B	false
112336	interacts with	CDK8 (interacts with) MAN1A2	false
112337	interacts with	CDK8 (interacts with) FUT11	false
112338	interacts with	CDK8 (interacts with) SLC35A3	false
112339	interacts with	CDK8 (interacts with) COG5	false
112340	interacts with	CDK8 (interacts with) GANAB	false
112341	interacts with	CDK8 (interacts with) SLC35E3	false
112342	interacts with	CDK8 (interacts with) PIGO	false
112343	interacts with	CDK8 (interacts with) FUT10	false
112344	interacts with	CDK8 (interacts with) COG8	false
112345	interacts with	CDK9 (interacts with) DPM2	false
112346	interacts with	CDK9 (interacts with) PIGQ	false
112347	interacts with	CDK9 (interacts with) RFNG	false
112348	interacts with	CDK9 (interacts with) DPM3	false
112349	interacts with	CDK9 (interacts with) B3GAT3	false
112350	interacts with	CDK9 (interacts with) B3GALT6	false
112351	interacts with	CDK9 (interacts with) MOGS	false
112352	interacts with	CDK9 (interacts with) SLC35C2	false
112353	interacts with	CEBPA (interacts with) MGAT1	false
112354	interacts with	CEBPA (interacts with) NAGK	false
112355	interacts with	CEBPA (interacts with) HPSE	false
112356	interacts with	CEBPA (interacts with) GAL3ST4	false
112357	interacts with	CEBPA (interacts with) MFNG	false
112358	interacts with	CEBPA (interacts with) GM2A	false
112359	interacts with	CEBPA (interacts with) HK3	false
112360	interacts with	CEBPA (interacts with) B3GNT8	false
112361	interacts with	CEBPA (interacts with) NPL	false
112362	interacts with	CEBPA (interacts with) FUT7	false
112363	interacts with	CEBPA (interacts with) ST8SIA4	false
112364	interacts with	CEBPA (interacts with) HEXA	false
112365	interacts with	CEBPA (interacts with) GBGT1	false
112366	interacts with	CEBPB (interacts with) B3GAT3	false
112367	interacts with	CHD1 (interacts with) OGT	false
112368	interacts with	CHD1 (interacts with) RTF1	false
112369	interacts with	CHD1 (interacts with) ALG13	false
112370	interacts with	CHD1 (interacts with) GALNT7	false
112371	interacts with	CHD1 (interacts with) COG3	false
112372	interacts with	CHD1 (interacts with) MAN2A2	false
112373	interacts with	CHD1 (interacts with) UGGT2	false
112374	interacts with	CHD1 (interacts with) B3GNT5	false
112375	interacts with	CHD2 (interacts with) MAN1A2	false
112376	interacts with	CHD2 (interacts with) OGT	false
112377	interacts with	CHD2 (interacts with) NDST2	false
112378	interacts with	CHD2 (interacts with) COG3	false
112379	interacts with	CHD2 (interacts with) FKTN	false
112380	interacts with	CHD2 (interacts with) ALG10B	false
112381	interacts with	CHD2 (interacts with) UGGT2	false
112382	interacts with	CHD2 (interacts with) PIGG	false
112383	interacts with	CHD4 (interacts with) NEU3	false
112384	interacts with	CHD4 (interacts with) GANAB	false
112385	interacts with	CHD4 (interacts with) SLC35E3	false
112386	interacts with	CHD4 (interacts with) FUT10	false
112387	interacts with	CHD7 (interacts with) OGT	false
112388	interacts with	CHD7 (interacts with) ALG10B	false
112389	interacts with	CHD7 (interacts with) FKTN	false
112390	interacts with	CHD7 (interacts with) NDST2	false
112391	interacts with	CHD7 (interacts with) RTF1	false
112392	interacts with	CHD7 (interacts with) UGGT2	false
112393	interacts with	CHD7 (interacts with) GALNT4	false
112394	interacts with	CHD7 (interacts with) EXTL2	false
112395	interacts with	CHD7 (interacts with) B3GALT5	false
112396	interacts with	CHD7 (interacts with) FUT11	false
112397	interacts with	CHD7 (interacts with) GALNT7	false
112398	interacts with	CHD7 (interacts with) MGAT4A	false
112399	interacts with	CHD7 (interacts with) SLC35D1	false
112400	interacts with	CHD7 (interacts with) POMT2	false
112401	interacts with	CIITA (interacts with) LAMP3	false
112402	interacts with	CIITA (interacts with) GAL3ST4	false
112403	interacts with	CIITA (interacts with) GM2A	false
112404	interacts with	CIITA (interacts with) GALNT2	false
112405	interacts with	CLOCK (interacts with) FUT11	false
112406	interacts with	CLOCK (interacts with) GANAB	false
112407	interacts with	CPSF3L (interacts with) B3GALT6	false
112408	interacts with	CPSF3L (interacts with) RFNG	false
112409	interacts with	CPSF3L (interacts with) PIGQ	false
112410	interacts with	CPSF3L (interacts with) B3GAT3	false
112411	interacts with	CPSF3L (interacts with) SLC35C2	false
112412	interacts with	CPSF3L (interacts with) POMGNT1	false
112413	interacts with	CPSF3L (interacts with) COG4	false
112414	interacts with	CPSF3L (interacts with) GALT	false
112415	interacts with	CPSF3L (interacts with) ST3GAL3	false
112416	interacts with	CPSF3L (interacts with) PIGL	false
112417	interacts with	CREB3L2 (interacts with) FUT11	false
112418	interacts with	CREB3L2 (interacts with) NDST2	false
112419	interacts with	CREB3L4 (interacts with) MOGS	false
112420	interacts with	CREBBP (interacts with) FUT11	false
112421	interacts with	CREBBP (interacts with) MAN1A2	false
112422	interacts with	CREBBP (interacts with) NEU3	false
112423	interacts with	CREBBP (interacts with) ACER2	false
112424	interacts with	CREBBP (interacts with) FUT10	false
112425	interacts with	CREBBP (interacts with) SLC35E1	false
112426	interacts with	CREBBP (interacts with) GANAB	false
112427	interacts with	CREBBP (interacts with) PIGN	false
112428	interacts with	CREBBP (interacts with) PIGO	false
112429	interacts with	CSNK2A1 (interacts with) GANAB	false
112430	interacts with	CSNK2A1 (interacts with) STT3A	false
112431	interacts with	CSNK2A1 (interacts with) FUT11	false
112432	interacts with	CSNK2A1 (interacts with) SLC35E3	false
112433	interacts with	CSNK2A1 (interacts with) UGDH	false
112434	interacts with	CTBP1 (interacts with) B3GAT3	false
112435	interacts with	CTBP1 (interacts with) DPM3	false
112436	interacts with	CTBP1 (interacts with) DPM2	false
112437	interacts with	CTBP2 (interacts with) HS3ST1	false
112438	interacts with	CTBP2 (interacts with) FUT8	false
112439	interacts with	CTBP2 (interacts with) CHST9	false
112440	interacts with	DCP1A (interacts with) STT3B	false
112441	interacts with	DCP1A (interacts with) PIGN	false
112442	interacts with	DDX5 (interacts with) EXTL2	false
112443	interacts with	DOT1L (interacts with) POMT2	false
112444	interacts with	E2F4 (interacts with) CHST5	false
112445	interacts with	E2F6 (interacts with) PIGW	false
112446	interacts with	E2F6 (interacts with) B3GALNT2	false
112447	interacts with	E2F6 (interacts with) CHST10	false
112448	interacts with	EHMT2 (interacts with) IDUA	false
112449	interacts with	ELF1 (interacts with) FUT11	false
112450	interacts with	ELF1 (interacts with) GANAB	false
112451	interacts with	ELF1 (interacts with) SLC35E1	false
112452	interacts with	EMX1 (interacts with) PIGQ	false
112453	interacts with	EMX1 (interacts with) B3GALT6	false
112454	interacts with	EMX1 (interacts with) DPM3	false
112455	interacts with	EP400 (interacts with) FKTN	false
112456	interacts with	EP400 (interacts with) OGT	false
112457	interacts with	EP400 (interacts with) ACER2	false
112458	interacts with	EP400 (interacts with) FUT11	false
112459	interacts with	EP400 (interacts with) COG5	false
112460	interacts with	EP400 (interacts with) B3GALNT2	false
112461	interacts with	EP400 (interacts with) EXTL2	false
112462	interacts with	ERCC3 (interacts with) PIGL	false
112463	interacts with	ESR1 (interacts with) ASAH1	false
112464	interacts with	ESR1 (interacts with) GM2A	false
112465	interacts with	ESR1 (interacts with) GNS	false
112466	interacts with	ESR1 (interacts with) GALK2	false
112467	interacts with	ESRRA (interacts with) RFNG	false
112468	interacts with	ESRRA (interacts with) DPM3	false
112469	interacts with	ESRRA (interacts with) ST3GAL3	false
112470	interacts with	ESRRA (interacts with) CHST13	false
112471	interacts with	ESRRA (interacts with) PMM1	false
112472	interacts with	ESRRA (interacts with) HYAL1	false
112473	interacts with	ETV1 (interacts with) CHSY1	false
112474	interacts with	ETV1 (interacts with) MGAT4A	false
112475	interacts with	EZH1 (interacts with) OGT	false
112476	interacts with	EZH1 (interacts with) COG1	false
112477	interacts with	EZH1 (interacts with) PIGL	false
112478	interacts with	EZH1 (interacts with) POMT2	false
112479	interacts with	EZH1 (interacts with) IDUA	false
112480	interacts with	EZH1 (interacts with) SGSH	false
112481	interacts with	EZH1 (interacts with) POMGNT1	false
112482	interacts with	FLI1 (interacts with) FUT7	false
112483	interacts with	FLI1 (interacts with) MAN1C1	false
112484	interacts with	FLI1 (interacts with) FUCA1	false
112485	interacts with	FLI1 (interacts with) CHST11	false
112486	interacts with	FLI1 (interacts with) CHST15	false
112487	interacts with	FLI1 (interacts with) HK3	false
112488	interacts with	FLI1 (interacts with) ST8SIA1	false
112489	interacts with	FLI1 (interacts with) CSGALNACT2	false
112490	interacts with	FLI1 (interacts with) MGAT1	false
112491	interacts with	FLI1 (interacts with) GM2A	false
112492	interacts with	FLI1 (interacts with) GAL3ST4	false
112493	interacts with	FLI1 (interacts with) LAMP3	false
112494	interacts with	FLI1 (interacts with) HPSE	false
112495	interacts with	FLI1 (interacts with) GALNT6	false
112496	interacts with	FLI1 (interacts with) GCNT1	false
112497	interacts with	FLI1 (interacts with) TPST2	false
112498	interacts with	FLI1 (interacts with) B3GNT8	false
112499	interacts with	FLI1 (interacts with) NAGK	false
112500	interacts with	FOSL2 (interacts with) UGCG	false
112501	interacts with	FOSL2 (interacts with) CHSY1	false
112502	interacts with	FOSL2 (interacts with) NEU3	false
112503	interacts with	FOSL2 (interacts with) GALNT5	false
112504	interacts with	FOSL2 (interacts with) CHST15	false
112505	interacts with	FOSL2 (interacts with) DSE	false
112506	interacts with	FOSL2 (interacts with) B3GALT5	false
112507	interacts with	FOSL2 (interacts with) PAPSS2	false
112508	interacts with	FOSL2 (interacts with) GALNT7	false
112509	interacts with	FOSL2 (interacts with) MGAT4A	false
112510	interacts with	FOSL2 (interacts with) SLC35F5	false
112511	interacts with	FOSL2 (interacts with) B3GNT7	false
112512	interacts with	GAPDH (interacts with) GPI	false
112513	interacts with	GATAD1 (interacts with) PIGL	false
112514	interacts with	GATAD1 (interacts with) OGT	false
112515	interacts with	GATAD1 (interacts with) ALG13	false
112516	interacts with	GATAD1 (interacts with) POFUT2	false
112517	interacts with	GATAD1 (interacts with) COG3	false
112518	interacts with	GATAD1 (interacts with) COG1	false
112519	interacts with	GATAD1 (interacts with) POMT2	false
112520	interacts with	GATAD1 (interacts with) ALG10B	false
112521	interacts with	GATAD1 (interacts with) PIGW	false
112522	interacts with	GLIS3 (interacts with) RTF1	false
112523	interacts with	GLYR1 (interacts with) COG7	false
112524	interacts with	GLYR1 (interacts with) ALG1	false
112525	interacts with	GLYR1 (interacts with) FUT11	false
112526	interacts with	GMEB2 (interacts with) MOGS	false
112527	interacts with	GPS2 (interacts with) GALK1	false
112528	interacts with	GRHL1 (interacts with) GALNT3	false
112529	interacts with	GRHL1 (interacts with) MOGS	false
112530	interacts with	GTF2I (interacts with) COG5	false
112531	interacts with	GTF2I (interacts with) UGGT1	false
112532	interacts with	GTF2I (interacts with) SLC35A3	false
112533	interacts with	GTF2I (interacts with) ALG10	false
112534	interacts with	GTF2I (interacts with) FUT11	false
112535	interacts with	GTF2I (interacts with) SLC35E3	false
112536	interacts with	GTF2I (interacts with) SLC35E1	false
112537	interacts with	GTF2I (interacts with) COG6	false
112538	interacts with	GTF2I (interacts with) GANAB	false
112539	interacts with	GTF2I (interacts with) ALG10B	false
112540	interacts with	GTF2I (interacts with) POFUT1	false
112541	interacts with	GTF2I (interacts with) GLCE	false
112542	interacts with	GTF2I (interacts with) COG3	false
112543	interacts with	GTF2I (interacts with) COG2	false
112544	interacts with	GTF2I (interacts with) GALNT7	false
112545	interacts with	GTF2I (interacts with) MGAT2	false
112546	interacts with	GTF3C1 (interacts with) COG8	false
112547	interacts with	GTF3C1 (interacts with) SLC35A2	false
112548	interacts with	GTF3C2 (interacts with) RTF1	false
112549	interacts with	HBP1 (interacts with) ALG10	false
112550	interacts with	HBP1 (interacts with) RTF1	false
112551	interacts with	HCFC1 (interacts with) NEU3	false
112552	interacts with	HCFC1 (interacts with) PIGO	false
112553	interacts with	HCFC1 (interacts with) MAN1A2	false
112554	interacts with	HCFC1 (interacts with) GANAB	false
112555	interacts with	HCFC1 (interacts with) NDST2	false
112556	interacts with	HCFC1 (interacts with) SLC35E1	false
112557	interacts with	HCFC1 (interacts with) FUT11	false
112558	interacts with	HCFC1 (interacts with) ACER2	false
112559	interacts with	HCFC1 (interacts with) PIGG	false
112560	interacts with	HCFC1 (interacts with) COG5	false
112561	interacts with	HCFC1 (interacts with) FKTN	false
112562	interacts with	HCFC1 (interacts with) B3GALNT2	false
112563	interacts with	HES1 (interacts with) LFNG	false
112564	interacts with	HES1 (interacts with) ST6GAL2	false
112565	interacts with	HES1 (interacts with) ST6GALNAC6	false
112566	interacts with	HEXIM1 (interacts with) COG1	false
112567	interacts with	HEXIM1 (interacts with) MOGS	false
112568	interacts with	HIF1A (interacts with) STT3B	false
112569	interacts with	HIF1A (interacts with) FUT11	false
112570	interacts with	HIF1A (interacts with) SLC35A3	false
112571	interacts with	HIF1A (interacts with) COG6	false
112572	interacts with	HIF1A (interacts with) MGAT2	false
112573	interacts with	HIF1A (interacts with) GNPNAT1	false
112574	interacts with	HIF1A (interacts with) GALC	false
112575	interacts with	HIF1A (interacts with) NEU3	false
112576	interacts with	HIF1A (interacts with) GALNT2	false
112577	interacts with	HIF1A (interacts with) FAM20B	false
112578	interacts with	HIF1A (interacts with) UAP1	false
112579	interacts with	HIF1A (interacts with) ST6GAL1	false
112580	interacts with	HIRA (interacts with) NDST1	false
112581	interacts with	HIRA (interacts with) PIGO	false
112582	interacts with	HNF1B (interacts with) COG1	false
112583	interacts with	HNF1B (interacts with) GALNT11	false
112584	interacts with	HNF1B (interacts with) LFNG	false
112585	interacts with	HNF1B (interacts with) B4GALNT2	false
112586	interacts with	HNF1B (interacts with) IDUA	false
112587	interacts with	HNF1B (interacts with) CHST9	false
112588	interacts with	HNF1B (interacts with) CHSY1	false
112589	interacts with	HNF1B (interacts with) EXTL2	false
112590	interacts with	HNF1B (interacts with) HS3ST1	false
112591	interacts with	HNF1B (interacts with) ALG12	false
112592	interacts with	HNF1B (interacts with) PIGQ	false
112593	interacts with	HNF4A (interacts with) B4GALT5	false
112594	interacts with	HNF4A (interacts with) KHK	false
112595	interacts with	HNF4A (interacts with) CHST13	false
112596	interacts with	HOXA2 (interacts with) CHST12	false
112597	interacts with	HOXA6 (interacts with) FUT11	false
112598	interacts with	HOXC9 (interacts with) B3GALT6	false
112599	interacts with	HOXC9 (interacts with) DPM3	false
112600	interacts with	HOXC9 (interacts with) IDUA	false
112601	interacts with	HOXC9 (interacts with) SULT1A3	false
112602	interacts with	HOXC9 (interacts with) PIGL	false
112603	interacts with	HOXC9 (interacts with) CHST5	false
112604	interacts with	HOXC9 (interacts with) ALG12	false
112605	interacts with	HOXC9 (interacts with) MOGS	false
112606	interacts with	HSF1 (interacts with) RFNG	false
112607	interacts with	HSF1 (interacts with) DPM2	false
112608	interacts with	HSF1 (interacts with) B3GAT3	false
112609	interacts with	HSF1 (interacts with) PIGQ	false
112610	interacts with	HSF1 (interacts with) DPM3	false
112611	interacts with	IKZF1 (interacts with) MFNG	false
112612	interacts with	IKZF1 (interacts with) ST8SIA4	false
112613	interacts with	IKZF1 (interacts with) LAMP3	false
112614	interacts with	IKZF1 (interacts with) MAN2B1	false
112615	interacts with	IKZF1 (interacts with) GM2A	false
112616	interacts with	IKZF1 (interacts with) MAN1C1	false
112617	interacts with	IKZF1 (interacts with) NAGK	false
112618	interacts with	IKZF1 (interacts with) GALNT6	false
112619	interacts with	IKZF1 (interacts with) CSGALNACT2	false
112620	interacts with	IKZF1 (interacts with) GCNT1	false
112621	interacts with	IKZF1 (interacts with) TPST2	false
112622	interacts with	IKZF1 (interacts with) B3GNT8	false
112623	interacts with	INO80 (interacts with) RTF1	false
112624	interacts with	INO80 (interacts with) GANAB	false
112625	interacts with	INO80 (interacts with) FUT11	false
112626	interacts with	INO80 (interacts with) PIGO	false
112627	interacts with	INTS3 (interacts with) IDUA	false
112628	interacts with	IRF3 (interacts with) B3GAT3	false
112629	interacts with	IRF3 (interacts with) RFNG	false
112630	interacts with	IRF3 (interacts with) PIGQ	false
112631	interacts with	IRF3 (interacts with) MOGS	false
112632	interacts with	IRF3 (interacts with) B3GALT6	false
112633	interacts with	IRF3 (interacts with) PIGL	false
112634	interacts with	IRF3 (interacts with) CHST5	false
112635	interacts with	IRF8 (interacts with) HK3	false
112636	interacts with	IRF8 (interacts with) ST8SIA4	false
112637	interacts with	IRF8 (interacts with) LIPA	false
112638	interacts with	IRF8 (interacts with) FUCA1	false
112639	interacts with	IRF8 (interacts with) GM2A	false
112640	interacts with	IRF8 (interacts with) GCNT1	false
112641	interacts with	IRF8 (interacts with) TPST2	false
112642	interacts with	IRF8 (interacts with) GNS	false
112643	interacts with	IRF8 (interacts with) HPSE	false
112644	interacts with	JMJD1C (interacts with) FUT11	false
112645	interacts with	JMJD1C (interacts with) STT3B	false
112646	interacts with	JMJD1C (interacts with) MAN1A2	false
112647	interacts with	JMJD1C (interacts with) NDST2	false
112648	interacts with	JMJD1C (interacts with) NEU3	false
112649	interacts with	JMJD1C (interacts with) IDS	false
112650	interacts with	JMJD1C (interacts with) GANAB	false
112651	interacts with	JMJD1C (interacts with) GALNT4	false
112652	interacts with	JMJD1C (interacts with) MAN2A2	false
112653	interacts with	JMJD1C (interacts with) RTF1	false
112654	interacts with	JMJD6 (interacts with) RFNG	false
112655	interacts with	JMJD6 (interacts with) GALK1	false
112656	interacts with	JUND (interacts with) DPM3	false
112657	interacts with	JUND (interacts with) RFNG	false
112658	interacts with	JUND (interacts with) DPM2	false
112659	interacts with	JUND (interacts with) B3GAT3	false
112660	interacts with	KAT2B (interacts with) SLC35A3	false
112661	interacts with	KAT2B (interacts with) NEU3	false
112662	interacts with	KAT2B (interacts with) MAN1A1	false
112663	interacts with	KAT2B (interacts with) COG6	false
112664	interacts with	KAT2B (interacts with) COG5	false
112665	interacts with	KAT2B (interacts with) CSGALNACT2	false
112666	interacts with	KAT2B (interacts with) CTBS	false
112667	interacts with	KAT2B (interacts with) SLC35A5	false
112668	interacts with	KAT2B (interacts with) GANAB	false
112669	interacts with	KAT2B (interacts with) PIGK	false
112670	interacts with	KAT2B (interacts with) FUT11	false
112671	interacts with	KAT2B (interacts with) UGGT1	false
112672	interacts with	KAT2B (interacts with) GFPT1	false
112673	interacts with	KAT2B (interacts with) FUT10	false
112674	interacts with	KAT2B (interacts with) GNS	false
112675	interacts with	KAT2B (interacts with) MGAT2	false
112676	interacts with	KAT2B (interacts with) NDST1	false
112677	interacts with	KDM1B (interacts with) MAN1A1	false
112678	interacts with	KDM2B (interacts with) MAN2A2	false
112679	interacts with	KDM2B (interacts with) B3GALNT2	false
112680	interacts with	KDM2B (interacts with) FKTN	false
112681	interacts with	KDM3A (interacts with) FKTN	false
112682	interacts with	KDM3A (interacts with) COG3	false
112683	interacts with	KDM3A (interacts with) EXTL2	false
112684	interacts with	KDM3A (interacts with) ACER2	false
112685	interacts with	KDM4C (interacts with) FKTN	false
112686	interacts with	KDM4C (interacts with) MAN1A2	false
112687	interacts with	KDM4C (interacts with) PIGO	false
112688	interacts with	KDM4C (interacts with) FUT11	false
112689	interacts with	KDM4C (interacts with) MAN2A2	false
112690	interacts with	KDM4C (interacts with) MGAT4A	false
112691	interacts with	KDM4C (interacts with) FUT10	false
112692	interacts with	KDM4C (interacts with) PIGN	false
112693	interacts with	KDM4C (interacts with) UGGT2	false
112694	interacts with	KDM4C (interacts with) PAPSS1	false
112695	interacts with	KDM4C (interacts with) SLC35E1	false
112696	interacts with	KDM4C (interacts with) GANAB	false
112697	interacts with	KDM6B (interacts with) POMT2	false
112698	interacts with	KDM6B (interacts with) CHSY1	false
112699	interacts with	KLF10 (interacts with) NDST2	false
112700	interacts with	KLF15 (interacts with) KHK	false
112701	interacts with	KLF4 (interacts with) GNE	false
112702	interacts with	KLF4 (interacts with) HS3ST1	false
112703	interacts with	KLF4 (interacts with) B4GALNT2	false
112704	interacts with	KLF4 (interacts with) FUT8	false
112705	interacts with	KLF4 (interacts with) MGAT4A	false
112706	interacts with	KLF4 (interacts with) FUT11	false
112707	interacts with	KLF4 (interacts with) CHST15	false
112708	interacts with	KLF5 (interacts with) B3GNT3	false
112709	interacts with	KLF5 (interacts with) CHSY1	false
112710	interacts with	L3MBTL2 (interacts with) POMGNT1	false
112711	interacts with	LDB1 (interacts with) GALNT10	false
112712	interacts with	LDB1 (interacts with) FAM20B	false
112713	interacts with	LYL1 (interacts with) MFNG	false
112714	interacts with	LYL1 (interacts with) FUT7	false
112715	interacts with	LYL1 (interacts with) MAN2B1	false
112716	interacts with	LYL1 (interacts with) MGAT1	false
112717	interacts with	LYL1 (interacts with) HK3	false
112718	interacts with	LYL1 (interacts with) CHST12	false
112719	interacts with	LYL1 (interacts with) ST8SIA4	false
112720	interacts with	LYL1 (interacts with) NAGK	false
112721	interacts with	LYL1 (interacts with) HPSE	false
112722	interacts with	LYL1 (interacts with) TPST2	false
112723	interacts with	LYL1 (interacts with) B3GNT8	false
112724	interacts with	LYL1 (interacts with) NANS	false
112725	interacts with	MAF (interacts with) GM2A	false
112726	interacts with	MAF (interacts with) RENBP	false
112727	interacts with	MAF (interacts with) GBA	false
112728	interacts with	MAF (interacts with) HEXB	false
112729	interacts with	MAF (interacts with) KHK	false
112730	interacts with	MAF (interacts with) GNPDA1	false
112731	interacts with	MAF (interacts with) GALK2	false
112732	interacts with	MAF (interacts with) ST6GALNAC2	false
112733	interacts with	MAF (interacts with) CTSA	false
112734	interacts with	MAF (interacts with) NAGLU	false
112735	interacts with	MAF (interacts with) UGT1A6	false
112736	interacts with	MAF (interacts with) GCNT2	false
112737	interacts with	MAFK (interacts with) POFUT2	false
112738	interacts with	MAFK (interacts with) IDUA	false
112739	interacts with	MAFK (interacts with) MOGS	false
112740	interacts with	MAFK (interacts with) ST6GALNAC6	false
112741	interacts with	MAFK (interacts with) PIGL	false
112742	interacts with	MAFK (interacts with) SGSH	false
112743	interacts with	MAZ (interacts with) PIGQ	false
112744	interacts with	MAZ (interacts with) B4GALT2	false
112745	interacts with	MAZ (interacts with) DPM2	false
112746	interacts with	MAZ (interacts with) B3GAT3	false
112747	interacts with	MAZ (interacts with) RFNG	false
112748	interacts with	MAZ (interacts with) DPM3	false
112749	interacts with	MBD2 (interacts with) ALG9	false
112750	interacts with	MBD2 (interacts with) CHSY1	false
112751	interacts with	MBD3 (interacts with) DPM2	false
112752	interacts with	MBD3 (interacts with) PIGQ	false
112753	interacts with	MBD3 (interacts with) B3GAT3	false
112754	interacts with	MBD3 (interacts with) RFNG	false
112755	interacts with	MBD3 (interacts with) B4GALT7	false
112756	interacts with	MBD3 (interacts with) DPM3	false
112757	interacts with	MBD3 (interacts with) B4GALT2	false
112758	interacts with	MBD3 (interacts with) IDUA	false
112759	interacts with	MBD3 (interacts with) ALG12	false
112760	interacts with	MECP2 (interacts with) IDS	false
112761	interacts with	MECP2 (interacts with) NDST2	false
112762	interacts with	MECP2 (interacts with) FUT11	false
112763	interacts with	MECP2 (interacts with) MAN2A2	false
112764	interacts with	MECP2 (interacts with) SLC35E1	false
112765	interacts with	MECP2 (interacts with) RTF1	false
112766	interacts with	MECP2 (interacts with) CHSY1	false
112767	interacts with	MECP2 (interacts with) GANAB	false
112768	interacts with	MECP2 (interacts with) B3GALNT2	false
112769	interacts with	MED1 (interacts with) FUT11	false
112770	interacts with	MED1 (interacts with) GANAB	false
112771	interacts with	MED1 (interacts with) PIGO	false
112772	interacts with	MEF2A (interacts with) FUT11	false
112773	interacts with	MEF2A (interacts with) RTF1	false
112774	interacts with	MEF2A (interacts with) PIGK	false
112775	interacts with	MEF2A (interacts with) OGT	false
112776	interacts with	MEF2A (interacts with) GNE	false
112777	interacts with	MEF2A (interacts with) FKTN	false
112778	interacts with	MEF2A (interacts with) COG5	false
112779	interacts with	MEF2A (interacts with) NDST2	false
112780	interacts with	MEF2A (interacts with) MAN2A2	false
112781	interacts with	MITF (interacts with) STT3B	false
112782	interacts with	MITF (interacts with) FUT11	false
112783	interacts with	MITF (interacts with) GALNT11	false
112784	interacts with	MITF (interacts with) CHSY1	false
112785	interacts with	MITF (interacts with) B3GALT5	false
112786	interacts with	MITF (interacts with) GALNT4	false
112787	interacts with	MITF (interacts with) RTF1	false
112788	interacts with	MITF (interacts with) B4GALT4	false
112789	interacts with	MITF (interacts with) B4GALT5	false
112790	interacts with	MITF (interacts with) HS3ST1	false
112791	interacts with	MITF (interacts with) COG5	false
112792	interacts with	MLLT1 (interacts with) B3GALNT2	false
112793	interacts with	MNT (interacts with) POMT2	false
112794	interacts with	MYC (interacts with) GNPDA1	false
112795	interacts with	MYC (interacts with) ST3GAL1	false
112796	interacts with	MYH11 (interacts with) CHSY3	false
112797	interacts with	MYH11 (interacts with) CHST1	false
112798	interacts with	MZF1 (interacts with) MOGS	false
112799	interacts with	NCOR1 (interacts with) SLC35D1	false
112800	interacts with	NFYB (interacts with) OGT	false
112801	interacts with	NFYC (interacts with) ST3GAL3	false
112802	interacts with	NFYC (interacts with) ALG12	false
112803	interacts with	NR1H2 (interacts with) RFNG	false
112804	interacts with	NR1H2 (interacts with) DPM3	false
112805	interacts with	NR1H2 (interacts with) PIGQ	false
112806	interacts with	NR1H2 (interacts with) DPM2	false
112807	interacts with	NR1H2 (interacts with) B3GAT3	false
112808	interacts with	NR1H3 (interacts with) TPST2	false
112809	interacts with	NR2C2 (interacts with) STT3B	false
112810	interacts with	NR2C2 (interacts with) FKTN	false
112811	interacts with	NR2C2 (interacts with) OGT	false
112812	interacts with	NR2C2 (interacts with) ALG10B	false
112813	interacts with	NR2C2 (interacts with) FUT11	false
112814	interacts with	NR2C2 (interacts with) COG3	false
112815	interacts with	NR2C2 (interacts with) COG5	false
112816	interacts with	NR2C2 (interacts with) B3GALNT2	false
112817	interacts with	NR2C2 (interacts with) GALNT4	false
112818	interacts with	NR2C2 (interacts with) EXTL2	false
112819	interacts with	NR2C2 (interacts with) PAPSS1	false
112820	interacts with	NR2C2 (interacts with) PIGG	false
112821	interacts with	NR2C2 (interacts with) PIGL	false
112822	interacts with	NR2F2 (interacts with) FUT11	false
112823	interacts with	NR2F2 (interacts with) RTF1	false
112824	interacts with	NR2F2 (interacts with) CHST14	false
112825	interacts with	NR2F2 (interacts with) FAM20B	false
112826	interacts with	NR2F2 (interacts with) GALNT4	false
112827	interacts with	NR2F2 (interacts with) FKTN	false
112828	interacts with	NR2F2 (interacts with) COG3	false
112829	interacts with	NR2F2 (interacts with) PIGM	false
112830	interacts with	NR2F2 (interacts with) UGGT2	false
112831	interacts with	NR2F2 (interacts with) GANAB	false
112832	interacts with	NRF1 (interacts with) B3GALT6	false
112833	interacts with	NRF1 (interacts with) MOGS	false
112834	interacts with	NRF1 (interacts with) IDUA	false
112835	interacts with	NRF1 (interacts with) PIGL	false
112836	interacts with	NRF1 (interacts with) CHST14	false
112837	interacts with	NRF1 (interacts with) SGSH	false
112838	interacts with	PALB2 (interacts with) SLC35A5	false
112839	interacts with	PCGF1 (interacts with) RFNG	false
112840	interacts with	PHF20 (interacts with) POFUT1	false
112841	interacts with	PHF20 (interacts with) UGCG	false
112842	interacts with	PHF20 (interacts with) FUT11	false
112843	interacts with	PHF20 (interacts with) SLC35E3	false
112844	interacts with	POU5F1 (interacts with) SGSH	false
112845	interacts with	POU5F1 (interacts with) POFUT2	false
112846	interacts with	POU5F1 (interacts with) IDUA	false
112847	interacts with	POU5F1 (interacts with) SLC35C2	false
112848	interacts with	POU5F1 (interacts with) PIGQ	false
112849	interacts with	POU5F1 (interacts with) MOGS	false
112850	interacts with	POU5F1 (interacts with) DPM3	false
112851	interacts with	POU5F1 (interacts with) RFNG	false
112852	interacts with	PPARA (interacts with) STT3B	false
112853	interacts with	PPARA (interacts with) MAN2A1	false
112854	interacts with	PPARA (interacts with) B4GALT5	false
112855	interacts with	PPARA (interacts with) KHK	false
112856	interacts with	PPARGC1A (interacts with) COG7	false
112857	interacts with	PRDM4 (interacts with) MGAT5	false
112858	interacts with	PRDM4 (interacts with) SLC35E3	false
112859	interacts with	RAG1 (interacts with) FKTN	false
112860	interacts with	RAG1 (interacts with) COG5	false
112861	interacts with	RAG1 (interacts with) SLC35A5	false
112862	interacts with	RAG1 (interacts with) SLC35D1	false
112863	interacts with	RAG1 (interacts with) PIGG	false
112864	interacts with	RAG1 (interacts with) COG7	false
112865	interacts with	RAG1 (interacts with) COG6	false
112866	interacts with	RAG1 (interacts with) GALNT11	false
112867	interacts with	RAG1 (interacts with) COG3	false
112868	interacts with	RAG1 (interacts with) STT3B	false
112869	interacts with	RAG1 (interacts with) MAN1A1	false
112870	interacts with	RAG1 (interacts with) FUT11	false
112871	interacts with	RAG1 (interacts with) MAN1A2	false
112872	interacts with	RAG1 (interacts with) MAN2A1	false
112873	interacts with	RAG1 (interacts with) C1GALT1	false
112874	interacts with	RAG1 (interacts with) GALNT1	false
112875	interacts with	RAG1 (interacts with) UGCG	false
112876	interacts with	RAG1 (interacts with) SLC35E3	false
112877	interacts with	RARA (interacts with) SGSH	false
112878	interacts with	RARA (interacts with) LFNG	false
112879	interacts with	RARA (interacts with) MOGS	false
112880	interacts with	RARA (interacts with) CHSY1	false
112881	interacts with	RARA (interacts with) CHST14	false
112882	interacts with	RARA (interacts with) IDUA	false
112883	interacts with	RARA (interacts with) ST6GALNAC6	false
112884	interacts with	RARA (interacts with) B3GNT3	false
112885	interacts with	RARA (interacts with) ALG12	false
112886	interacts with	RB1 (interacts with) COG6	false
112887	interacts with	RB1 (interacts with) COG3	false
112888	interacts with	RB1 (interacts with) STT3B	false
112889	interacts with	RB1 (interacts with) ALG10B	false
112890	interacts with	RB1 (interacts with) ALG10	false
112891	interacts with	RB1 (interacts with) PIGK	false
112892	interacts with	RB1 (interacts with) NEU3	false
112893	interacts with	RB1 (interacts with) UGCG	false
112894	interacts with	RB1 (interacts with) GNE	false
112895	interacts with	RB1 (interacts with) GALNT4	false
112896	interacts with	RB1 (interacts with) FUT11	false
112897	interacts with	RB1 (interacts with) FUT10	false
112898	interacts with	RB1 (interacts with) GANAB	false
112899	interacts with	RB1 (interacts with) PAPSS1	false
112900	interacts with	RBL2 (interacts with) ALG10B	false
112901	interacts with	RBL2 (interacts with) SLC35A5	false
112902	interacts with	RBL2 (interacts with) ALG10	false
112903	interacts with	RBL2 (interacts with) SLC35A3	false
112904	interacts with	RBL2 (interacts with) STT3B	false
112905	interacts with	RBL2 (interacts with) PIGN	false
112906	interacts with	RBL2 (interacts with) COG6	false
112907	interacts with	RBL2 (interacts with) SLC35D1	false
112908	interacts with	RBL2 (interacts with) PIGK	false
112909	interacts with	RBL2 (interacts with) GNE	false
112910	interacts with	RBL2 (interacts with) GALNT4	false
112911	interacts with	RBL2 (interacts with) UGGT2	false
112912	interacts with	RBL2 (interacts with) FUT11	false
112913	interacts with	RBL2 (interacts with) PIGO	false
112914	interacts with	REST (interacts with) FUT11	false
112915	interacts with	REST (interacts with) GANAB	false
112916	interacts with	RFX2 (interacts with) LFNG	false
112917	interacts with	RFX2 (interacts with) POMT2	false
112918	interacts with	RFX2 (interacts with) CHSY1	false
112919	interacts with	RFX2 (interacts with) POMGNT1	false
112920	interacts with	RFX2 (interacts with) B3GALNT2	false
112921	interacts with	RFX5 (interacts with) NEU3	false
112922	interacts with	RFX5 (interacts with) SLC35A5	false
112923	interacts with	RFX5 (interacts with) SLC35E3	false
112924	interacts with	RFX5 (interacts with) UGGT1	false
112925	interacts with	RFX5 (interacts with) ALG10	false
112926	interacts with	RFX5 (interacts with) MAN1A2	false
112927	interacts with	RFX5 (interacts with) SULT1C4	false
112928	interacts with	RFX5 (interacts with) COG5	false
112929	interacts with	RFX5 (interacts with) COG6	false
112930	interacts with	RFX5 (interacts with) FPGT	false
112931	interacts with	RFX5 (interacts with) SLC35A3	false
112932	interacts with	RFX5 (interacts with) FUT10	false
112933	interacts with	RFX5 (interacts with) PIGK	false
112934	interacts with	RFX5 (interacts with) NDST1	false
112935	interacts with	RFX5 (interacts with) HS2ST1	false
112936	interacts with	RUNX3 (interacts with) GALNT6	false
112937	interacts with	RUNX3 (interacts with) B3GNT8	false
112938	interacts with	RYBP (interacts with) STT3B	false
112939	interacts with	RYBP (interacts with) GALNT1	false
112940	interacts with	RYBP (interacts with) B3GNT5	false
112941	interacts with	RYBP (interacts with) MGAT4A	false
112942	interacts with	RYBP (interacts with) PAPSS2	false
112943	interacts with	RYBP (interacts with) UGGT2	false
112944	interacts with	RYBP (interacts with) ST6GAL2	false
112945	interacts with	RYBP (interacts with) GALNT11	false
112946	interacts with	SATB1 (interacts with) MGAT5	false
112947	interacts with	SATB1 (interacts with) STT3B	false
112948	interacts with	SATB1 (interacts with) FUT11	false
112949	interacts with	SFMBT1 (interacts with) STT3B	false
112950	interacts with	SFMBT1 (interacts with) SLC35A5	false
112951	interacts with	SFMBT1 (interacts with) PIGN	false
112952	interacts with	SFMBT1 (interacts with) SLC35E3	false
112953	interacts with	SFMBT1 (interacts with) ARSB	false
112954	interacts with	SIRT6 (interacts with) DPM2	false
112955	interacts with	SIRT6 (interacts with) B3GAT3	false
112956	interacts with	SIRT6 (interacts with) RFNG	false
112957	interacts with	SIRT6 (interacts with) PIGQ	false
112958	interacts with	SIRT6 (interacts with) TSTA3	false
112959	interacts with	SIRT6 (interacts with) B4GALT7	false
112960	interacts with	SIRT6 (interacts with) B3GALT6	false
112961	interacts with	SIRT6 (interacts with) IDUA	false
112962	interacts with	SIRT6 (interacts with) GALE	false
112963	interacts with	SIX5 (interacts with) MOGS	false
112964	interacts with	SIX5 (interacts with) B3GAT3	false
112965	interacts with	SIX5 (interacts with) SLC35C2	false
112966	interacts with	SMAD3 (interacts with) CHSY1	false
112967	interacts with	SMAD3 (interacts with) RTF1	false
112968	interacts with	SMAD3 (interacts with) OGT	false
112969	interacts with	SMAD3 (interacts with) GALNT7	false
112970	interacts with	SMAD3 (interacts with) HAS3	false
112971	interacts with	SMAD3 (interacts with) B3GALT5	false
112972	interacts with	SMAD3 (interacts with) PIGM	false
112973	interacts with	SMAD4 (interacts with) ALG10B	false
112974	interacts with	SMAD4 (interacts with) SLC35D1	false
112975	interacts with	SMAD4 (interacts with) RTF1	false
112976	interacts with	SMAD4 (interacts with) COG5	false
112977	interacts with	SMAD4 (interacts with) EXTL2	false
112978	interacts with	SMAD4 (interacts with) FUT11	false
112979	interacts with	SMAD4 (interacts with) B3GALNT2	false
112980	interacts with	SMAD4 (interacts with) PIGK	false
112981	interacts with	SMAD4 (interacts with) GLCE	false
112982	interacts with	SMAD4 (interacts with) GALNT7	false
112983	interacts with	SMAD4 (interacts with) ALG10	false
112984	interacts with	SMAD4 (interacts with) CHST9	false
112985	interacts with	SMAD4 (interacts with) GALNT4	false
112986	interacts with	SMAD4 (interacts with) ARSD	false
112987	interacts with	SMAD4 (interacts with) ST6GAL2	false
112988	interacts with	SMARCA4 (interacts with) SLC35E1	false
112989	interacts with	SMARCC2 (interacts with) OGT	false
112990	interacts with	SMARCC2 (interacts with) ALG10B	false
112991	interacts with	SMARCC2 (interacts with) PIGL	false
112992	interacts with	SMARCC2 (interacts with) NDST2	false
112993	interacts with	SMARCC2 (interacts with) GALNT4	false
112994	interacts with	SMARCC2 (interacts with) IDUA	false
112995	interacts with	SMARCC2 (interacts with) B3GALNT2	false
112996	interacts with	SNAPC1 (interacts with) UAP1	false
112997	interacts with	SOX4 (interacts with) RTF1	false
112998	interacts with	SOX9 (interacts with) CHSY1	false
112999	interacts with	SP2 (interacts with) PIGO	false
113000	interacts with	SP2 (interacts with) MAN1A2	false
113001	interacts with	SP2 (interacts with) STT3B	false
113002	interacts with	SP2 (interacts with) GANAB	false
113003	interacts with	SP2 (interacts with) ALG10	false
113004	interacts with	SP2 (interacts with) UGGT1	false
113005	interacts with	SP2 (interacts with) PIGN	false
113006	interacts with	SP2 (interacts with) SLC35A5	false
113007	interacts with	SP2 (interacts with) FUT10	false
113008	interacts with	SP2 (interacts with) HS2ST1	false
113009	interacts with	SP2 (interacts with) MAN1A1	false
113010	interacts with	SP2 (interacts with) PIGG	false
113011	interacts with	SP2 (interacts with) GALNT10	false
113012	interacts with	SP2 (interacts with) GLCE	false
113013	interacts with	SP2 (interacts with) UGT8	false
113014	interacts with	SP2 (interacts with) MGAT2	false
113015	interacts with	SP2 (interacts with) PIGM	false
113016	interacts with	SRCAP (interacts with) COG7	false
113017	interacts with	SRCAP (interacts with) FUT11	false
113018	interacts with	SRCAP (interacts with) B3GALT5	false
113019	interacts with	STAT1 (interacts with) GCNT1	false
113020	interacts with	STAT1 (interacts with) DSE	false
113021	interacts with	STAT1 (interacts with) FUT11	false
113022	interacts with	STAT1 (interacts with) SLC35E1	false
113023	interacts with	STAT1 (interacts with) MAN2A1	false
113024	interacts with	STAT1 (interacts with) UGGT1	false
113025	interacts with	STAT1 (interacts with) SLC35F5	false
113026	interacts with	STAT1 (interacts with) ACER2	false
113027	interacts with	STAT1 (interacts with) UGDH	false
113028	interacts with	STAT1 (interacts with) STT3B	false
113029	interacts with	STAT1 (interacts with) STT3A	false
113030	interacts with	STAT1 (interacts with) SLC35E3	false
113031	interacts with	STAT1 (interacts with) NEU3	false
113032	interacts with	STAT1 (interacts with) SLC35A2	false
113033	interacts with	STAT2 (interacts with) OGT	false
113034	interacts with	STAT2 (interacts with) POFUT2	false
113035	interacts with	STAT2 (interacts with) NDST2	false
113036	interacts with	STAT2 (interacts with) PIGL	false
113037	interacts with	STAT2 (interacts with) ALG10B	false
113038	interacts with	STAT2 (interacts with) MOGS	false
113039	interacts with	STAT2 (interacts with) A4GNT	false
113040	interacts with	STAT3 (interacts with) MGAT5	false
113041	interacts with	STAT3 (interacts with) NEU3	false
113042	interacts with	STAT3 (interacts with) MAN2A1	false
113043	interacts with	STAT3 (interacts with) FUT11	false
113044	interacts with	STAT3 (interacts with) UGGT1	false
113045	interacts with	STAT3 (interacts with) ACER2	false
113046	interacts with	STAT3 (interacts with) MAN1A1	false
113047	interacts with	STAT3 (interacts with) CHSY1	false
113048	interacts with	STAT3 (interacts with) MGAT4A	false
113049	interacts with	STAT3 (interacts with) SLC35E1	false
113050	interacts with	STAT3 (interacts with) PIGO	false
113051	interacts with	STAT3 (interacts with) GANAB	false
113052	interacts with	STAT3 (interacts with) COG5	false
113053	interacts with	STAT3 (interacts with) GNE	false
113054	interacts with	STAT3 (interacts with) DSE	false
113055	interacts with	STAT3 (interacts with) GALNT7	false
113056	interacts with	STAT3 (interacts with) MGAT2	false
113057	interacts with	STAT4 (interacts with) GCNT1	false
113058	interacts with	STAT5A (interacts with) MFNG	false
113059	interacts with	STAT5A (interacts with) GBGT1	false
113060	interacts with	STAT5B (interacts with) COG1	false
113061	interacts with	STAT5B (interacts with) MGAT4A	false
113062	interacts with	STAT5B (interacts with) GNE	false
113063	interacts with	STAT5B (interacts with) FUT11	false
113064	interacts with	STAT5B (interacts with) CHSY1	false
113065	interacts with	STAT5B (interacts with) GALNT4	false
113066	interacts with	STAT5B (interacts with) PIGV	false
113067	interacts with	SUMO1 (interacts with) C1GALT1C1	false
113068	interacts with	SUMO2 (interacts with) PIGC	false
113069	interacts with	SUMO2 (interacts with) DPM3	false
113070	interacts with	SVIL (interacts with) ACER2	false
113071	interacts with	SVIL (interacts with) CHSY1	false
113072	interacts with	TBL1X (interacts with) FUT11	false
113073	interacts with	TBL1X (interacts with) UGCG	false
113074	interacts with	TBP (interacts with) SLC35A1	false
113075	interacts with	TBP (interacts with) PIGW	false
113076	interacts with	TBP (interacts with) COG3	false
113077	interacts with	TBP (interacts with) EXTL2	false
113078	interacts with	TBP (interacts with) B3GALNT2	false
113079	interacts with	TBP (interacts with) ALG13	false
113080	interacts with	TCF12 (interacts with) FUT11	false
113081	interacts with	TCF12 (interacts with) GLCE	false
113082	interacts with	TCF12 (interacts with) FUT10	false
113083	interacts with	TCF12 (interacts with) GANAB	false
113084	interacts with	TCF21 (interacts with) HAS2	false
113085	interacts with	TCFL5 (interacts with) ALG10B	false
113086	interacts with	TEAD1 (interacts with) UGCG	false
113087	interacts with	TEAD1 (interacts with) FUT11	false
113088	interacts with	TEAD1 (interacts with) SLC35A3	false
113089	interacts with	TEAD1 (interacts with) NDST1	false
113090	interacts with	TEAD1 (interacts with) UGGT1	false
113091	interacts with	TEAD1 (interacts with) SLC35D1	false
113092	interacts with	TEAD1 (interacts with) ALG10	false
113093	interacts with	TEAD1 (interacts with) SLC35A5	false
113094	interacts with	TEAD1 (interacts with) DSE	false
113095	interacts with	TEAD1 (interacts with) FUT10	false
113096	interacts with	TEAD1 (interacts with) STT3A	false
113097	interacts with	TEAD1 (interacts with) B3GALT5	false
113098	interacts with	TEAD1 (interacts with) GALNT7	false
113099	interacts with	TEAD2 (interacts with) FUT2	false
113100	interacts with	TEAD2 (interacts with) GAL3ST3	false
113101	interacts with	TEAD2 (interacts with) LFNG	false
113102	interacts with	TERF1 (interacts with) FAM20B	false
113103	interacts with	TERF1 (interacts with) STT3B	false
113104	interacts with	TERF1 (interacts with) FKTN	false
113105	interacts with	TERF1 (interacts with) SLC35F5	false
113106	interacts with	TERF1 (interacts with) PIGK	false
113107	interacts with	TERF1 (interacts with) SLC35E3	false
113108	interacts with	TERF1 (interacts with) SLC35A3	false
113109	interacts with	TERF1 (interacts with) MAN2A1	false
113110	interacts with	TERF1 (interacts with) GANAB	false
113111	interacts with	TERF1 (interacts with) FPGT	false
113112	interacts with	TERF1 (interacts with) STT3A	false
113113	interacts with	TERF1 (interacts with) FUT10	false
113114	interacts with	TERF1 (interacts with) MGAT5	false
113115	interacts with	TERF1 (interacts with) SLC35E1	false
113116	interacts with	TERF2 (interacts with) COG8	false
113117	interacts with	TERF2 (interacts with) SLC35E3	false
113118	interacts with	TERF2 (interacts with) COG7	false
113119	interacts with	TERF2 (interacts with) FKTN	false
113120	interacts with	TERF2 (interacts with) SLC35E1	false
113121	interacts with	TERF2 (interacts with) SLC35A3	false
113122	interacts with	TET2 (interacts with) MAN1A2	false
113123	interacts with	TET2 (interacts with) FUT11	false
113124	interacts with	TET2 (interacts with) ACER2	false
113125	interacts with	TET2 (interacts with) NDST2	false
113126	interacts with	TET2 (interacts with) SLC35D1	false
113127	interacts with	TET2 (interacts with) CSGALNACT2	false
113128	interacts with	TET2 (interacts with) PIGN	false
113129	interacts with	TET2 (interacts with) GLCE	false
113130	interacts with	TET2 (interacts with) B3GAT2	false
113131	interacts with	TET2 (interacts with) GALNT4	false
113132	interacts with	TET2 (interacts with) PIGG	false
113133	interacts with	TET2 (interacts with) UGGT2	false
113134	interacts with	TET2 (interacts with) A4GNT	false
113135	interacts with	TFE3 (interacts with) UAP1	false
113136	interacts with	TFE3 (interacts with) UGDH	false
113137	interacts with	TGIF1 (interacts with) CHSY1	false
113138	interacts with	TGIF1 (interacts with) MOGS	false
113139	interacts with	THAP11 (interacts with) COG8	false
113140	interacts with	THAP11 (interacts with) COG4	false
113141	interacts with	TRRAP (interacts with) FUT11	false
113142	interacts with	TRRAP (interacts with) PIGO	false
113143	interacts with	TRRAP (interacts with) SLC35A5	false
113144	interacts with	TRRAP (interacts with) ALG10B	false
113145	interacts with	UBTF (interacts with) PIGQ	false
113146	interacts with	UBTF (interacts with) CHST10	false
113147	interacts with	UBTF (interacts with) LFNG	false
113148	interacts with	UBTF (interacts with) IDUA	false
113149	interacts with	UBTF (interacts with) SLC35C2	false
113150	interacts with	USF2 (interacts with) DPM3	false
113151	interacts with	USF2 (interacts with) B3GALT6	false
113152	interacts with	USF2 (interacts with) MFNG	false
113153	interacts with	VDR (interacts with) KHK	false
113154	interacts with	VDR (interacts with) GALK2	false
113155	interacts with	VEZF1 (interacts with) ALG10B	false
113156	interacts with	VEZF1 (interacts with) ALG10	false
113157	interacts with	VEZF1 (interacts with) SLC35A5	false
113158	interacts with	VEZF1 (interacts with) UGCG	false
113159	interacts with	VEZF1 (interacts with) FKTN	false
113160	interacts with	VEZF1 (interacts with) GNE	false
113161	interacts with	VEZF1 (interacts with) PIGN	false
113162	interacts with	VEZF1 (interacts with) GANAB	false
113163	interacts with	VEZF1 (interacts with) NDST2	false
113164	interacts with	VEZF1 (interacts with) PIGK	false
113165	interacts with	VEZF1 (interacts with) DSE	false
113166	interacts with	VEZF1 (interacts with) GALNT4	false
113167	interacts with	VEZF1 (interacts with) B3GALNT2	false
113168	interacts with	VEZF1 (interacts with) PAPSS1	false
113169	interacts with	VEZF1 (interacts with) UGGT2	false
113170	interacts with	VEZF1 (interacts with) PIGO	false
113171	interacts with	VEZF1 (interacts with) PIGG	false
113172	interacts with	VEZF1 (interacts with) PIGA	false
113173	interacts with	XRN2 (interacts with) STT3B	false
113174	interacts with	XRN2 (interacts with) MAN2A1	false
113175	interacts with	XRN2 (interacts with) MAN1A2	false
113176	interacts with	XRN2 (interacts with) FUT11	false
113177	interacts with	XRN2 (interacts with) COG5	false
113178	interacts with	XRN2 (interacts with) PIGN	false
113179	interacts with	XRN2 (interacts with) POFUT1	false
113180	interacts with	XRN2 (interacts with) GANAB	false
113181	interacts with	XRN2 (interacts with) SLC35E1	false
113182	interacts with	XRN2 (interacts with) PIGO	false
113183	interacts with	XRN2 (interacts with) SLC35E3	false
113184	interacts with	XRN2 (interacts with) FUT10	false
113185	interacts with	ZBTB10 (interacts with) ALG10	false
113186	interacts with	ZBTB17 (interacts with) RFNG	false
113187	interacts with	ZBTB17 (interacts with) B3GALT6	false
113188	interacts with	ZBTB17 (interacts with) PIGQ	false
113189	interacts with	ZBTB17 (interacts with) B3GAT3	false
113190	interacts with	ZBTB17 (interacts with) DPM3	false
113191	interacts with	ZBTB17 (interacts with) IDUA	false
113192	interacts with	ZBTB17 (interacts with) SLC35C2	false
113193	interacts with	ZBTB17 (interacts with) CHST12	false
113194	interacts with	ZBTB17 (interacts with) B4GALT2	false
113195	interacts with	ZBTB17 (interacts with) ALG12	false
113196	interacts with	ZBTB17 (interacts with) DPM2	false
113197	interacts with	ZBTB17 (interacts with) POMGNT1	false
113198	interacts with	ZBTB17 (interacts with) SGSH	false
113199	interacts with	ZBTB17 (interacts with) ST3GAL3	false
