# Supplementary material for: A systems-based framework to computationally describe putative transcription factors and signaling pathways regulating glycan biosynthesis
Source: publisher site journal article supplement (doi:10.3762/bjoc.17.119), 2021-07-22
Supplement: Additional file 2 [file 1860-5397-17-119-S2.cys › CytoscapeSession-2021_03_21-12_01/tables/112204-KIRP/LOCAL_ATTRS-org.cytoscape.model.CyNode-KIRP+default+node.cytable]

CyCSV-Version	1
SUID	name	nodeType	selected
java.lang.Long	java.lang.String	java.lang.String	java.lang.Boolean
		mutable
KIRP default node
110787	AEBP2	TF	false
105731	FAM20B	Glycogene	false
105692	COG5	Glycogene	false
105686	AFF4	TF	false
105687	MAN1A2	Glycogene	false
105688	STT3B	Glycogene	false
105689	NEU3	Glycogene	false
105690	FUT11	Glycogene	false
105691	ACER2	Glycogene	false
105985	UGCG	Glycogene	false
105697	GALNT10	Glycogene	false
106844	SLC35E1	Glycogene	false
105998	GANAB	Glycogene	false
106836	AHR	TF	false
106027	GALNT5	Glycogene	false
105703	GALNT4	Glycogene	false
105693	AR	TF	false
105694	MAN2A1	Glycogene	false
105874	PIGO	Glycogene	false
105713	FKTN	Glycogene	false
107278	FUT10	Glycogene	false
106835	PIGK	Glycogene	false
107279	B4GALT5	Glycogene	false
108548	ARNT2	TF	false
105727	ALG10B	Glycogene	false
112214	ARNTL	TF	false
107328	PAPSS2	Glycogene	false
107273	ASH2L	TF	false
105824	COG6	Glycogene	false
105973	COG2	Glycogene	false
105695	SLC35A3	Glycogene	false
110806	GALK2	Glycogene	false
105976	FPGT	Glycogene	false
108005	SLC17A5	Glycogene	false
105732	SLC35E3	Glycogene	false
105704	ATF2	TF	false
105696	SLC35F5	Glycogene	false
108551	UGDH	Glycogene	false
111091	ATF5	TF	false
105777	MAN2B1	Glycogene	false
105710	ATF7IP	TF	false
105711	ALG10	Glycogene	false
105712	ATRX	TF	false
105714	BACH1	TF	false
105715	CSGALNACT2	Glycogene	false
105716	MAN1A1	Glycogene	false
107291	PAPSS1	Glycogene	false
105772	NDST2	Glycogene	false
105730	PIGN	Glycogene	false
111092	BCL3	TF	false
105768	A4GALT	Glycogene	false
112215	BHLHE40	TF	false
106861	CHST15	Glycogene	false
105733	BRD1	TF	false
105748	MAN2A2	Glycogene	false
105823	COG3	Glycogene	false
105717	CHSY1	Glycogene	false
105749	IDUA	Glycogene	false
105762	MOGS	Glycogene	false
107277	BRD3	TF	false
105700	RTF1	Glycogene	false
105908	B3GALNT2	Glycogene	false
107977	BRD7	TF	false
105799	DPM1	Glycogene	false
110789	BTAF1	TF	false
108578	PIGL	Glycogene	false
105736	C17orf49	TF	false
105754	B3GAT3	Glycogene	false
111093	CAMTA2	TF	false
110804	SGSH	Glycogene	false
105741	CBX3	TF	false
109670	C1GALT1	Glycogene	false
106847	CBX6	TF	false
105705	UGGT1	Glycogene	false
105745	CBX7	TF	false
106860	MGAT4A	Glycogene	false
105752	CBX8	TF	false
105744	RFNG	Glycogene	false
105759	PIGQ	Glycogene	false
105755	CCDC101	TF	false
106848	CDK12	TF	false
105954	PIGM	Glycogene	false
105756	CDK8	TF	false
106891	COG8	Glycogene	false
105757	CDK9	TF	false
105758	DPM2	Glycogene	false
105722	DPM3	Glycogene	false
105781	B3GALT6	Glycogene	false
107986	SLC35C2	Glycogene	false
105764	CEBPA	TF	false
105724	MGAT1	Glycogene	false
105765	NAGK	Glycogene	false
106000	HPSE	Glycogene	false
105778	GAL3ST4	Glycogene	false
105766	MFNG	Glycogene	false
105883	GM2A	Glycogene	false
105859	HK3	Glycogene	false
107983	B3GNT8	Glycogene	false
105860	NPL	Glycogene	false
105685	FUT7	Glycogene	false
105834	ST8SIA4	Glycogene	false
112216	HEXA	Glycogene	false
105897	GBGT1	Glycogene	false
105767	CEBPB	TF	false
105769	CHD1	TF	false
105771	OGT	Glycogene	false
105864	ALG13	Glycogene	false
106859	GALNT7	Glycogene	false
105966	UGGT2	Glycogene	false
105707	B3GNT5	Glycogene	false
105770	CHD2	TF	false
109689	PIGG	Glycogene	false
105773	CHD4	TF	false
112217	CHD7	TF	false
105844	EXTL2	Glycogene	false
108034	B3GALT5	Glycogene	false
105950	SLC35D1	Glycogene	false
108023	POMT2	Glycogene	false
105775	CIITA	TF	false
105776	LAMP3	Glycogene	false
107306	GALNT2	Glycogene	false
106849	CLOCK	TF	false
105780	CPSF3L	TF	false
105783	POMGNT1	Glycogene	false
106892	COG4	Glycogene	false
106851	GALT	Glycogene	false
105747	ST3GAL3	Glycogene	false
111095	CREB3L2	TF	false
105788	CREB3L4	TF	false
105790	CREBBP	TF	false
108568	CSNK2A1	TF	false
106893	STT3A	Glycogene	false
105793	CTBP1	TF	false
111096	CTBP2	TF	false
105910	HS3ST1	Glycogene	false
107976	FUT8	Glycogene	false
105939	CHST9	Glycogene	false
106850	DCP1A	TF	false
112218	DDX5	TF	false
108570	DOT1L	TF	false
107987	E2F4	TF	false
108612	CHST5	Glycogene	false
105801	E2F6	TF	false
105729	PIGW	Glycogene	false
108013	CHST10	Glycogene	false
105821	EHMT2	TF	false
105822	ELF1	TF	false
111097	EMX1	TF	false
105829	EP400	TF	false
107292	ERCC3	TF	false
112219	ESR1	TF	false
107290	ASAH1	Glycogene	false
105905	GNS	Glycogene	false
110794	ESRRA	TF	false
105913	CHST13	Glycogene	false
105735	PMM1	Glycogene	false
105751	HYAL1	Glycogene	false
105842	ETV1	TF	false
105846	EZH1	TF	false
106005	COG1	Glycogene	false
105848	FLI1	TF	false
106853	MAN1C1	Glycogene	false
106856	FUCA1	Glycogene	false
105718	CHST11	Glycogene	false
105840	ST8SIA1	Glycogene	false
108561	GALNT6	Glycogene	false
108552	GCNT1	Glycogene	false
106840	TPST2	Glycogene	false
107295	FOSL2	TF	false
105779	DSE	Glycogene	false
108004	B3GNT7	Glycogene	false
106863	GAPDH	TF	false
106864	GPI	Glycogene	false
105863	GATAD1	TF	false
107327	POFUT2	Glycogene	false
112220	GLIS3	TF	false
105866	GLYR1	TF	false
105791	COG7	Glycogene	false
105867	ALG1	Glycogene	false
108589	GMEB2	TF	false
106865	GPS2	TF	false
105753	GALK1	Glycogene	false
106866	GRHL1	TF	false
108000	GALNT3	Glycogene	false
105871	GTF2I	TF	false
105792	POFUT1	Glycogene	false
105851	GLCE	Glycogene	false
106868	MGAT2	Glycogene	false
110795	GTF3C1	TF	false
107335	SLC35A2	Glycogene	false
107302	GTF3C2	TF	false
108591	HBP1	TF	false
105873	HCFC1	TF	false
111101	HES1	TF	false
106846	LFNG	Glycogene	false
105720	ST6GAL2	Glycogene	false
105746	ST6GALNAC6	Glycogene	false
112221	HEXIM1	TF	false
106867	HIF1A	TF	false
105855	GNPNAT1	Glycogene	false
106869	GALC	Glycogene	false
105820	UAP1	Glycogene	false
106855	ST6GAL1	Glycogene	false
108595	HIRA	TF	false
105923	NDST1	Glycogene	false
107994	HNF1B	TF	false
107974	GALNT11	Glycogene	false
107352	B4GALNT2	Glycogene	false
105734	ALG12	Glycogene	false
107995	HNF4A	TF	false
105800	KHK	Glycogene	false
112222	HOXA2	TF	false
105763	CHST12	Glycogene	false
107308	HOXA6	TF	false
111104	HOXC9	TF	false
108594	SULT1A3	Glycogene	false
105879	HSF1	TF	false
105882	IKZF1	TF	false
105885	INO80	TF	false
105886	INTS3	TF	false
106872	IRF3	TF	false
105890	IRF8	TF	false
105884	LIPA	Glycogene	false
105892	JMJD1C	TF	false
105922	IDS	Glycogene	false
105894	JMJD6	TF	false
105899	JUND	TF	false
107312	KAT2B	TF	false
105869	CTBS	Glycogene	false
105702	SLC35A5	Glycogene	false
106882	GFPT1	Glycogene	false
106873	KDM1B	TF	false
107313	KDM2B	TF	false
105903	KDM3A	TF	false
107997	KDM4C	TF	false
107315	KDM6B	TF	false
111106	KLF10	TF	false
108597	KLF15	TF	false
107317	KLF4	TF	false
107297	GNE	Glycogene	false
107318	KLF5	TF	false
112223	B3GNT3	Glycogene	false
112224	L3MBTL2	TF	false
107320	LDB1	TF	false
105911	LYL1	TF	false
108002	NANS	Glycogene	false
106876	MAF	TF	false
105912	RENBP	Glycogene	false
107309	GBA	Glycogene	false
108585	HEXB	Glycogene	false
107305	GNPDA1	Glycogene	false
112225	ST6GALNAC2	Glycogene	false
107984	CTSA	Glycogene	false
109680	NAGLU	Glycogene	false
112226	UGT1A6	Glycogene	false
107296	GCNT2	Glycogene	false
108006	MAFK	TF	false
105916	MAZ	TF	false
105917	B4GALT2	Glycogene	false
107322	MBD2	TF	false
108554	ALG9	Glycogene	false
107323	MBD3	TF	false
105782	B4GALT7	Glycogene	false
105921	MECP2	TF	false
105924	MED1	TF	false
105925	MEF2A	TF	false
105929	MITF	TF	false
112227	B4GALT4	Glycogene	false
108601	MLLT1	TF	false
110801	MNT	TF	false
108009	MYC	TF	false
108579	ST3GAL1	Glycogene	false
105937	MYH11	TF	false
105833	CHSY3	Glycogene	false
108010	CHST1	Glycogene	false
105942	MZF1	TF	false
108603	NCOR1	TF	false
107330	NFYB	TF	false
105946	NFYC	TF	false
109685	NR1H2	TF	false
110807	NR1H3	TF	false
105949	NR2C2	TF	false
108017	NR2F2	TF	false
108018	CHST14	Glycogene	false
107333	NRF1	TF	false
112228	PALB2	TF	false
105955	PCGF1	TF	false
105956	PHF20	TF	false
111110	POU5F1	TF	false
106881	PPARA	TF	false
110809	PPARGC1A	TF	false
108021	PRDM4	TF	false
105893	MGAT5	Glycogene	false
112229	RAG1	TF	false
106014	GALNT1	Glycogene	false
106884	RARA	TF	false
105965	RB1	TF	false
105968	RBL2	TF	false
105970	REST	TF	false
108611	RFX2	TF	false
105972	RFX5	TF	false
105837	SULT1C4	Glycogene	false
105906	HS2ST1	Glycogene	false
105982	RUNX3	TF	false
107338	RYBP	TF	false
108614	SATB1	TF	false
108615	SFMBT1	TF	false
105843	ARSB	Glycogene	false
106885	SIRT6	TF	false
105880	TSTA3	Glycogene	false
108559	GALE	Glycogene	false
105986	SIX5	TF	false
107342	SMAD3	TF	false
105941	HAS3	Glycogene	false
105987	SMAD4	TF	false
112230	ARSD	Glycogene	false
107343	SMARCA4	TF	false
105988	SMARCC2	TF	false
108618	SNAPC1	TF	false
108620	SOX4	TF	false
108621	SOX9	TF	false
107346	SP2	TF	false
106842	UGT8	Glycogene	false
105994	SRCAP	TF	false
105999	STAT1	TF	false
106001	STAT2	TF	false
111099	A4GNT	Glycogene	false
107347	STAT3	TF	false
106002	STAT4	TF	false
106003	STAT5A	TF	false
108029	STAT5B	TF	false
111090	PIGV	Glycogene	false
112231	SUMO1	TF	false
106032	C1GALT1C1	Glycogene	false
106004	SUMO2	TF	false
108558	PIGC	Glycogene	false
107349	SVIL	TF	false
111113	TBL1X	TF	false
108030	TBP	TF	false
108001	SLC35A1	Glycogene	false
106007	TCF12	TF	false
108031	TCF21	TF	false
105709	HAS2	Glycogene	false
112232	TCFL5	TF	false
106013	TEAD1	TF	false
109690	TEAD2	TF	false
107287	FUT2	Glycogene	false
108590	GAL3ST3	Glycogene	false
106015	TERF1	TF	false
107353	TERF2	TF	false
106016	TET2	TF	false
108606	B3GAT2	Glycogene	false
108625	TFE3	TF	false
109691	TGIF1	TF	false
106890	THAP11	TF	false
108628	TRRAP	TF	false
106020	UBTF	TF	false
106022	USF2	TF	false
107356	VDR	TF	false
106023	VEZF1	TF	false
108027	PIGA	Glycogene	false
106025	XRN2	TF	false
106894	ZBTB10	TF	false
106029	ZBTB17	TF	false
