# Supplementary material for: A systems-based framework to computationally describe putative transcription factors and signaling pathways regulating glycan biosynthesis
Source: publisher site journal article supplement (doi:10.3762/bjoc.17.119), 2021-07-22
Supplement: Additional file 2 [file 1860-5397-17-119-S2.cys › CytoscapeSession-2021_03_21-12_01/tables/113200-LAML/LOCAL_ATTRS-org.cytoscape.model.CyEdge-LAML+default+edge.cytable]

CyCSV-Version	1
SUID	interaction	name	selected
java.lang.Long	java.lang.String	java.lang.String	java.lang.Boolean
LAML default edge
113236	interacts with	AEBP2 (interacts with) FAM20B	false
113237	interacts with	AEBP2 (interacts with) COG5	false
113238	interacts with	AFF4 (interacts with) MAN1A2	false
113239	interacts with	AFF4 (interacts with) STT3B	false
113240	interacts with	AFF4 (interacts with) COG5	false
113241	interacts with	AFF4 (interacts with) SLC35A3	false
113242	interacts with	AFF4 (interacts with) SLC35D1	false
113243	interacts with	AFF4 (interacts with) ALG10	false
113244	interacts with	AFF4 (interacts with) GFPT1	false
113245	interacts with	AFF4 (interacts with) ALG10B	false
113246	interacts with	AFF4 (interacts with) SLC35F5	false
113247	interacts with	AFF4 (interacts with) HS2ST1	false
113248	interacts with	AFF4 (interacts with) OGT	false
113249	interacts with	AHR (interacts with) GALNT4	false
113250	interacts with	AHR (interacts with) LFNG	false
113251	interacts with	ALKBH3 (interacts with) GANAB	false
113252	interacts with	ALKBH3 (interacts with) PIGL	false
113253	interacts with	ARID2 (interacts with) COG6	false
113254	interacts with	ARID3A (interacts with) NAGA	false
113255	interacts with	ARID3A (interacts with) NDST1	false
113256	interacts with	ARID3A (interacts with) MGAT1	false
113257	interacts with	ARID3A (interacts with) B4GALT1	false
113258	interacts with	ARID3A (interacts with) B3GALT4	false
113259	interacts with	ARID3A (interacts with) GM2A	false
113260	interacts with	ARID3A (interacts with) GNS	false
113261	interacts with	ARID3A (interacts with) GBA	false
113262	interacts with	ARID3A (interacts with) SLC35C1	false
113263	interacts with	ARID3A (interacts with) PMM1	false
113264	interacts with	ARID3A (interacts with) EXTL3	false
113265	interacts with	ARID3A (interacts with) SGSH	false
113266	interacts with	ARNT (interacts with) SLC17A5	false
113267	interacts with	ARNTL (interacts with) SGSH	false
113268	interacts with	ARNTL (interacts with) HK1	false
113269	interacts with	ARNTL (interacts with) PMM1	false
113270	interacts with	ARNTL (interacts with) B3GALT4	false
113271	interacts with	ARNTL (interacts with) B4GALT1	false
113272	interacts with	ASH2L (interacts with) COG6	false
113273	interacts with	ASH2L (interacts with) ALG9	false
113274	interacts with	ASH2L (interacts with) FKTN	false
113275	interacts with	ASH2L (interacts with) ALG8	false
113276	interacts with	ASH2L (interacts with) PIGC	false
113277	interacts with	ASH2L (interacts with) B3GNT2	false
113278	interacts with	ATF1 (interacts with) SLC35A5	false
113279	interacts with	ATF1 (interacts with) GNPNAT1	false
113280	interacts with	ATF1 (interacts with) DPM1	false
113281	interacts with	ATF1 (interacts with) C1GALT1	false
113282	interacts with	ATF2 (interacts with) MAN1A2	false
113283	interacts with	ATF2 (interacts with) FUT11	false
113284	interacts with	ATF2 (interacts with) SLC35F5	false
113285	interacts with	ATF2 (interacts with) NEU3	false
113286	interacts with	ATF2 (interacts with) FUT10	false
113287	interacts with	ATF2 (interacts with) STT3B	false
113288	interacts with	ATF2 (interacts with) COG5	false
113289	interacts with	ATF2 (interacts with) SLC35A3	false
113290	interacts with	ATF2 (interacts with) COG6	false
113291	interacts with	ATF2 (interacts with) FKTN	false
113292	interacts with	ATF2 (interacts with) ALG10	false
113293	interacts with	ATF2 (interacts with) COG3	false
113294	interacts with	ATF2 (interacts with) ALG11	false
113295	interacts with	ATF2 (interacts with) ALG10B	false
113296	interacts with	ATF2 (interacts with) GALNT7	false
113297	interacts with	ATF2 (interacts with) FUT8	false
113298	interacts with	ATF2 (interacts with) PIGG	false
113299	interacts with	ATF2 (interacts with) OGT	false
113300	interacts with	ATF2 (interacts with) GALK2	false
113301	interacts with	ATF4 (interacts with) RFNG	false
113302	interacts with	ATF4 (interacts with) B4GALT7	false
113303	interacts with	ATF4 (interacts with) B4GALT3	false
113304	interacts with	ATF4 (interacts with) IDUA	false
113305	interacts with	ATF4 (interacts with) DPM3	false
113306	interacts with	ATF4 (interacts with) POMT1	false
113307	interacts with	ATF4 (interacts with) CHPF2	false
113308	interacts with	ATF4 (interacts with) POMT2	false
113309	interacts with	ATF4 (interacts with) B3GAT3	false
113310	interacts with	ATF4 (interacts with) MOGS	false
113311	interacts with	ATF4 (interacts with) CHST11	false
113312	interacts with	ATF4 (interacts with) ST3GAL3	false
113313	interacts with	ATF4 (interacts with) MAN1B1	false
113314	interacts with	ATF4 (interacts with) SLC35A2	false
113315	interacts with	ATF4 (interacts with) GALT	false
113316	interacts with	ATF4 (interacts with) SLC35B2	false
113317	interacts with	ATF7IP (interacts with) ALG10	false
113318	interacts with	ATRX (interacts with) FKTN	false
113319	interacts with	ATRX (interacts with) SLC35A3	false
113320	interacts with	BACH1 (interacts with) CSGALNACT2	false
113321	interacts with	BACH1 (interacts with) COG5	false
113322	interacts with	BACH1 (interacts with) ASAH1	false
113323	interacts with	BACH2 (interacts with) GCNT4	false
113324	interacts with	BATF (interacts with) CTSA	false
113325	interacts with	BATF (interacts with) TPST2	false
113326	interacts with	BATF (interacts with) DPM2	false
113327	interacts with	BATF (interacts with) DPM3	false
113328	interacts with	BATF (interacts with) ARSA	false
113329	interacts with	BATF (interacts with) GALE	false
113330	interacts with	BATF (interacts with) B3GAT3	false
113331	interacts with	BATF (interacts with) B3GALT4	false
113332	interacts with	BATF (interacts with) MFNG	false
113333	interacts with	BATF (interacts with) GBA	false
113334	interacts with	BATF (interacts with) NEU1	false
113335	interacts with	BATF (interacts with) PMM1	false
113336	interacts with	BATF (interacts with) SLC35C1	false
113337	interacts with	BATF (interacts with) GPAA1	false
113338	interacts with	BATF (interacts with) SLC35A4	false
113339	interacts with	BATF (interacts with) B3GNT8	false
113340	interacts with	BCAT1 (interacts with) ALG10	false
113341	interacts with	BCL11A (interacts with) ALG10B	false
113342	interacts with	BCL11A (interacts with) B4GALT6	false
113343	interacts with	BCL11A (interacts with) ALG9	false
113344	interacts with	BCL11A (interacts with) PIGM	false
113345	interacts with	BCL11A (interacts with) SULT1C4	false
113346	interacts with	BCL11A (interacts with) COG6	false
113347	interacts with	BCL11A (interacts with) GNPNAT1	false
113348	interacts with	BCL11A (interacts with) MAN1A1	false
113349	interacts with	BCL11A (interacts with) SLC35D1	false
113350	interacts with	BCL6 (interacts with) CHST15	false
113351	interacts with	BCL6 (interacts with) CSGALNACT2	false
113352	interacts with	BCL6 (interacts with) HEXB	false
113353	interacts with	BCL6 (interacts with) GCNT2	false
113354	interacts with	BCL6 (interacts with) SGSH	false
113355	interacts with	BCL6 (interacts with) NPL	false
113356	interacts with	BCL6 (interacts with) GNS	false
113357	interacts with	BCL6 (interacts with) NAGA	false
113358	interacts with	BCL6 (interacts with) B4GALT1	false
113359	interacts with	BCL6 (interacts with) ASAH1	false
113360	interacts with	BCL6 (interacts with) MGAT1	false
113361	interacts with	BCL6 (interacts with) GM2A	false
113362	interacts with	BCL6 (interacts with) NAAA	false
113363	interacts with	BCL6 (interacts with) FUCA1	false
113364	interacts with	BCL6 (interacts with) B3GALT4	false
113365	interacts with	BCL6 (interacts with) GBA	false
113366	interacts with	BMI1 (interacts with) ALG10B	false
113367	interacts with	BMI1 (interacts with) MAN1A2	false
113368	interacts with	BMI1 (interacts with) ALG10	false
113369	interacts with	BMI1 (interacts with) GALNT12	false
113370	interacts with	BRCA1 (interacts with) PIGW	false
113371	interacts with	BRCA1 (interacts with) ALG10	false
113372	interacts with	BRCA1 (interacts with) UGGT1	false
113373	interacts with	BRCA1 (interacts with) PIGN	false
113374	interacts with	BRCA1 (interacts with) RTF1	false
113375	interacts with	BRCA1 (interacts with) GNPNAT1	false
113376	interacts with	BRCA1 (interacts with) SLC35B4	false
113377	interacts with	BRCA1 (interacts with) FAM20B	false
113378	interacts with	BRCA1 (interacts with) GNE	false
113379	interacts with	BRCA1 (interacts with) ALG9	false
113380	interacts with	BRCA1 (interacts with) B3GALNT2	false
113381	interacts with	BRCA1 (interacts with) GFPT1	false
113382	interacts with	BRCA1 (interacts with) COG6	false
113383	interacts with	BRCA1 (interacts with) ALG8	false
113384	interacts with	BRD1 (interacts with) ALG12	false
113385	interacts with	BRD1 (interacts with) POMT1	false
113386	interacts with	BRD1 (interacts with) MAN1B1	false
113387	interacts with	BRD1 (interacts with) ST6GALNAC6	false
113388	interacts with	BRD1 (interacts with) RFNG	false
113389	interacts with	BRD1 (interacts with) FKRP	false
113390	interacts with	BRD1 (interacts with) PIGG	false
113391	interacts with	BRD1 (interacts with) GALT	false
113392	interacts with	BRD1 (interacts with) COG8	false
113393	interacts with	BRD1 (interacts with) COG1	false
113394	interacts with	BRD1 (interacts with) PIGO	false
113395	interacts with	BRD1 (interacts with) POMGNT1	false
113396	interacts with	BRD1 (interacts with) PIGQ	false
113397	interacts with	BRD1 (interacts with) GAL3ST4	false
113398	interacts with	BRD1 (interacts with) GALNT9	false
113399	interacts with	BRD1 (interacts with) FUT1	false
113400	interacts with	BRD1 (interacts with) XYLT2	false
113401	interacts with	BRD2 (interacts with) PIGO	false
113402	interacts with	BRD2 (interacts with) POFUT2	false
113403	interacts with	BRD2 (interacts with) FKRP	false
113404	interacts with	BRD2 (interacts with) B4GALT3	false
113405	interacts with	BRD2 (interacts with) POMT1	false
113406	interacts with	BRD2 (interacts with) B4GALT7	false
113407	interacts with	BRD2 (interacts with) ALG12	false
113408	interacts with	BRD2 (interacts with) POMGNT1	false
113409	interacts with	BRD2 (interacts with) RFNG	false
113410	interacts with	BRD2 (interacts with) B3GAT3	false
113411	interacts with	BRD2 (interacts with) ST3GAL3	false
113412	interacts with	BRD2 (interacts with) GALT	false
113413	interacts with	BRD2 (interacts with) MAN1B1	false
113414	interacts with	BRD2 (interacts with) CHPF2	false
113415	interacts with	BRD2 (interacts with) SLC35C2	false
113416	interacts with	BRD2 (interacts with) XYLT2	false
113417	interacts with	BRD3 (interacts with) RTF1	false
113418	interacts with	BRD4 (interacts with) COG8	false
113419	interacts with	BRD4 (interacts with) ST3GAL2	false
113420	interacts with	BRD4 (interacts with) FKRP	false
113421	interacts with	BRD4 (interacts with) ALG12	false
113422	interacts with	BRD4 (interacts with) B3GNT9	false
113423	interacts with	BRD7 (interacts with) DPM1	false
113424	interacts with	BRD7 (interacts with) PIGK	false
113425	interacts with	BTAF1 (interacts with) PIGL	false
113426	interacts with	BTAF1 (interacts with) CSGALNACT1	false
113427	interacts with	CAMTA2 (interacts with) SGSH	false
113428	interacts with	CAMTA2 (interacts with) SMPD1	false
113429	interacts with	CAMTA2 (interacts with) MGAT1	false
113430	interacts with	CASP8AP2 (interacts with) ALG10B	false
113431	interacts with	CASP8AP2 (interacts with) ALG10	false
113432	interacts with	CBFA2T3 (interacts with) ALG12	false
113433	interacts with	CBFB (interacts with) GALNT7	false
113434	interacts with	CBFB (interacts with) GNE	false
113435	interacts with	CBFB (interacts with) GNPNAT1	false
113436	interacts with	CBFB (interacts with) PIGN	false
113437	interacts with	CBFB (interacts with) MAN1A2	false
113438	interacts with	CBFB (interacts with) SLC35A5	false
113439	interacts with	CBX3 (interacts with) DPM1	false
113440	interacts with	CBX3 (interacts with) ALG5	false
113441	interacts with	CBX3 (interacts with) ALG8	false
113442	interacts with	CBX3 (interacts with) PIGF	false
113443	interacts with	CBX3 (interacts with) CMAS	false
113444	interacts with	CBX3 (interacts with) EXTL2	false
113445	interacts with	CBX3 (interacts with) PIGP	false
113446	interacts with	CBX3 (interacts with) PIGY	false
113447	interacts with	CBX3 (interacts with) COG2	false
113448	interacts with	CBX3 (interacts with) SLC35B4	false
113449	interacts with	CBX3 (interacts with) PIGN	false
113450	interacts with	CBX3 (interacts with) GNE	false
113451	interacts with	CBX4 (interacts with) B4GALT3	false
113452	interacts with	CBX4 (interacts with) MOGS	false
113453	interacts with	CBX4 (interacts with) SLC35A2	false
113454	interacts with	CBX4 (interacts with) MAN2B1	false
113455	interacts with	CCDC101 (interacts with) B3GAT3	false
113456	interacts with	CDK8 (interacts with) STT3B	false
113457	interacts with	CDK8 (interacts with) NEU3	false
113458	interacts with	CDK8 (interacts with) MAN1A2	false
113459	interacts with	CDK8 (interacts with) SLC35A3	false
113460	interacts with	CDK8 (interacts with) UGGT1	false
113461	interacts with	CDK8 (interacts with) SLC35D1	false
113462	interacts with	CDK8 (interacts with) HS2ST1	false
113463	interacts with	CDK8 (interacts with) GFPT1	false
113464	interacts with	CDK8 (interacts with) SLC35F5	false
113465	interacts with	CDK8 (interacts with) ALG10	false
113466	interacts with	CDK8 (interacts with) PIGN	false
113467	interacts with	CDK8 (interacts with) PIGW	false
113468	interacts with	CDK8 (interacts with) COG2	false
113469	interacts with	CDK8 (interacts with) ALG9	false
113470	interacts with	CDK8 (interacts with) GALNT7	false
113471	interacts with	CDK8 (interacts with) ALG10B	false
113472	interacts with	CDK9 (interacts with) MAN1B1	false
113473	interacts with	CDK9 (interacts with) RFNG	false
113474	interacts with	CDK9 (interacts with) B3GAT3	false
113475	interacts with	CDK9 (interacts with) GALT	false
113476	interacts with	CDK9 (interacts with) B4GALT7	false
113477	interacts with	CDK9 (interacts with) CHST12	false
113478	interacts with	CDK9 (interacts with) FUT7	false
113479	interacts with	CDK9 (interacts with) COG1	false
113480	interacts with	CDK9 (interacts with) FKRP	false
113481	interacts with	CDK9 (interacts with) ALG12	false
113482	interacts with	CDK9 (interacts with) CHPF2	false
113483	interacts with	CEBPA (interacts with) FUT4	false
113484	interacts with	CEBPA (interacts with) CTSA	false
113485	interacts with	CEBPA (interacts with) DPM3	false
113486	interacts with	CEBPA (interacts with) SLC35B2	false
113487	interacts with	CEBPA (interacts with) ST3GAL4	false
113488	interacts with	CEBPA (interacts with) CHST12	false
113489	interacts with	CEBPA (interacts with) GPI	false
113490	interacts with	CEBPA (interacts with) NAGLU	false
113491	interacts with	CEBPA (interacts with) CHPF2	false
113492	interacts with	CEBPA (interacts with) MOGS	false
113493	interacts with	CEBPA (interacts with) CHST14	false
113494	interacts with	CEBPA (interacts with) IDUA	false
113495	interacts with	CEBPA (interacts with) GPAA1	false
113496	interacts with	CEBPB (interacts with) NEU1	false
113497	interacts with	CEBPB (interacts with) HK3	false
113498	interacts with	CEBPB (interacts with) MGAT1	false
113499	interacts with	CEBPB (interacts with) GBA	false
113500	interacts with	CEBPB (interacts with) NAGK	false
113501	interacts with	CEBPB (interacts with) GNS	false
113502	interacts with	CEBPB (interacts with) CHST15	false
113503	interacts with	CEBPB (interacts with) B4GALT1	false
113504	interacts with	CEBPB (interacts with) NAAA	false
113505	interacts with	CEBPB (interacts with) SGSH	false
113506	interacts with	CEBPD (interacts with) MGAT1	false
113507	interacts with	CEBPD (interacts with) PMM1	false
113508	interacts with	CEBPD (interacts with) NEU1	false
113509	interacts with	CEBPG (interacts with) B3GALNT2	false
113510	interacts with	CEBPZ (interacts with) RTF1	false
113511	interacts with	CHD1 (interacts with) SLC35A3	false
113512	interacts with	CHD1 (interacts with) ALG13	false
113513	interacts with	CHD1 (interacts with) COG6	false
113514	interacts with	CHD1 (interacts with) GALNT7	false
113515	interacts with	CHD1 (interacts with) COG3	false
113516	interacts with	CHD1 (interacts with) SLC35F5	false
113517	interacts with	CHD1 (interacts with) HS2ST1	false
113518	interacts with	CHD1 (interacts with) C1GALT1	false
113519	interacts with	CHD2 (interacts with) MAN1A2	false
113520	interacts with	CHD2 (interacts with) OGT	false
113521	interacts with	CHD2 (interacts with) COG3	false
113522	interacts with	CHD2 (interacts with) FKTN	false
113523	interacts with	CHD2 (interacts with) ALG10B	false
113524	interacts with	CHD2 (interacts with) PIGG	false
113525	interacts with	CHD2 (interacts with) GFPT1	false
113526	interacts with	CHD2 (interacts with) ALG11	false
113527	interacts with	CHD2 (interacts with) SLC35A3	false
113528	interacts with	CHD2 (interacts with) ALG10	false
113529	interacts with	CHD2 (interacts with) SLC35F5	false
113530	interacts with	CHD4 (interacts with) NEU3	false
113531	interacts with	CHD4 (interacts with) PIGW	false
113532	interacts with	CHD8 (interacts with) NEU3	false
113533	interacts with	CHD8 (interacts with) STT3B	false
113534	interacts with	CHD8 (interacts with) ALG10	false
113535	interacts with	CHD8 (interacts with) SLC35A3	false
113536	interacts with	CHD8 (interacts with) OGT	false
113537	interacts with	CHD8 (interacts with) COG8	false
113538	interacts with	CHD8 (interacts with) ALG10B	false
113539	interacts with	CHD8 (interacts with) FUT8	false
113540	interacts with	CHD8 (interacts with) SLC35D1	false
113541	interacts with	CHD8 (interacts with) FKTN	false
113542	interacts with	CHD8 (interacts with) COG6	false
113543	interacts with	CHD8 (interacts with) PIGN	false
113544	interacts with	CHD8 (interacts with) PIGG	false
113545	interacts with	CHD8 (interacts with) ALG9	false
113546	interacts with	CHD8 (interacts with) HS2ST1	false
113547	interacts with	CHD8 (interacts with) SLC35F5	false
113548	interacts with	CHD8 (interacts with) ALG11	false
113549	interacts with	CHD8 (interacts with) COG3	false
113550	interacts with	CIITA (interacts with) MAN1A1	false
113551	interacts with	CPSF3L (interacts with) RFNG	false
113552	interacts with	CPSF3L (interacts with) PIGQ	false
113553	interacts with	CPSF3L (interacts with) B3GAT3	false
113554	interacts with	CPSF3L (interacts with) TSTA3	false
113555	interacts with	CPSF3L (interacts with) MOGS	false
113556	interacts with	CPSF3L (interacts with) B4GALT7	false
113557	interacts with	CPSF3L (interacts with) GALE	false
113558	interacts with	CPSF3L (interacts with) POMGNT1	false
113559	interacts with	CPSF3L (interacts with) GALT	false
113560	interacts with	CPSF3L (interacts with) ST3GAL3	false
113561	interacts with	CPSF3L (interacts with) GPAA1	false
113562	interacts with	CPSF3L (interacts with) MAN1B1	false
113563	interacts with	CPSF3L (interacts with) ALG3	false
113564	interacts with	CPSF3L (interacts with) GANAB	false
113565	interacts with	CPSF3L (interacts with) B4GALT3	false
113566	interacts with	CPSF3L (interacts with) PIGO	false
113567	interacts with	CPSF3L (interacts with) COG1	false
113568	interacts with	CPSF3L (interacts with) MPI	false
113569	interacts with	CPSF3L (interacts with) COG8	false
113570	interacts with	CREB3L4 (interacts with) ALG10B	false
113571	interacts with	CREBBP (interacts with) ST3GAL5	false
113572	interacts with	CSNK2A1 (interacts with) FUT8	false
113573	interacts with	CTBP1 (interacts with) B3GAT3	false
113574	interacts with	CTBP1 (interacts with) DPM3	false
113575	interacts with	CTBP1 (interacts with) DPM2	false
113576	interacts with	CTBP1 (interacts with) B4GALT7	false
113577	interacts with	CTBP1 (interacts with) MOGS	false
113578	interacts with	CTBP1 (interacts with) B4GALT3	false
113579	interacts with	CTBP1 (interacts with) ALG3	false
113580	interacts with	DAXX (interacts with) DPAGT1	false
113581	interacts with	DAXX (interacts with) GALE	false
113582	interacts with	DCP1A (interacts with) SLC35D1	false
113583	interacts with	DEK (interacts with) PIGK	false
113584	interacts with	DOT1L (interacts with) POMT2	false
113585	interacts with	DOT1L (interacts with) B3GAT3	false
113586	interacts with	E2F1 (interacts with) GALK1	false
113587	interacts with	E2F1 (interacts with) ALG3	false
113588	interacts with	E2F1 (interacts with) DPM2	false
113589	interacts with	E2F1 (interacts with) B4GALT2	false
113590	interacts with	E2F1 (interacts with) B3GALT6	false
113591	interacts with	E2F1 (interacts with) GPAA1	false
113592	interacts with	E2F1 (interacts with) SLC35B2	false
113593	interacts with	E2F1 (interacts with) GALE	false
113594	interacts with	E2F1 (interacts with) DDOST	false
113595	interacts with	E2F1 (interacts with) ST3GAL3	false
113596	interacts with	E2F1 (interacts with) GMPPB	false
113597	interacts with	E2F1 (interacts with) PIGQ	false
113598	interacts with	E2F1 (interacts with) DPM3	false
113599	interacts with	E2F1 (interacts with) GPI	false
113600	interacts with	E2F1 (interacts with) POMT2	false
113601	interacts with	E2F3 (interacts with) FAM20B	false
113602	interacts with	E2F3 (interacts with) PIGW	false
113603	interacts with	E2F3 (interacts with) MAN1A2	false
113604	interacts with	E2F3 (interacts with) PIGM	false
113605	interacts with	E2F3 (interacts with) GNPNAT1	false
113606	interacts with	E2F3 (interacts with) SLC35B4	false
113607	interacts with	E2F3 (interacts with) GFPT1	false
113608	interacts with	E2F3 (interacts with) SLC35F5	false
113609	interacts with	E2F3 (interacts with) COG6	false
113610	interacts with	E2F3 (interacts with) SLC35D1	false
113611	interacts with	E2F3 (interacts with) SLC35A3	false
113612	interacts with	E2F3 (interacts with) EXTL2	false
113613	interacts with	E2F3 (interacts with) GALNT7	false
113614	interacts with	E2F3 (interacts with) COG5	false
113615	interacts with	E2F3 (interacts with) PIGV	false
113616	interacts with	E2F3 (interacts with) SLC35E3	false
113617	interacts with	E2F4 (interacts with) COG4	false
113618	interacts with	E2F4 (interacts with) MOGS	false
113619	interacts with	E2F4 (interacts with) ALG3	false
113620	interacts with	E2F4 (interacts with) PIGQ	false
113621	interacts with	E2F4 (interacts with) B4GALT3	false
113622	interacts with	E2F4 (interacts with) GMPPA	false
113623	interacts with	E2F4 (interacts with) IDUA	false
113624	interacts with	E2F4 (interacts with) RFNG	false
113625	interacts with	E2F4 (interacts with) B3GAT3	false
113626	interacts with	E2F4 (interacts with) DPM2	false
113627	interacts with	E2F4 (interacts with) TSTA3	false
113628	interacts with	E2F4 (interacts with) GALE	false
113629	interacts with	E2F4 (interacts with) GALK1	false
113630	interacts with	E2F4 (interacts with) GPAA1	false
113631	interacts with	E2F4 (interacts with) ALG12	false
113632	interacts with	E2F4 (interacts with) ST6GALNAC4	false
113633	interacts with	E2F4 (interacts with) SLC35C1	false
113634	interacts with	E2F4 (interacts with) DPM3	false
113635	interacts with	E2F4 (interacts with) NAGLU	false
113636	interacts with	E2F4 (interacts with) B4GALT7	false
113637	interacts with	E2F4 (interacts with) GALT	false
113638	interacts with	E2F4 (interacts with) SLC35A4	false
113639	interacts with	E2F6 (interacts with) PIGW	false
113640	interacts with	E2F6 (interacts with) EXTL2	false
113641	interacts with	E2F6 (interacts with) FAM20B	false
113642	interacts with	E2F6 (interacts with) FKTN	false
113643	interacts with	E2F6 (interacts with) FUT8	false
113644	interacts with	E2F6 (interacts with) UAP1	false
113645	interacts with	E2F6 (interacts with) SLC35A3	false
113646	interacts with	E2F6 (interacts with) SLC35D1	false
113647	interacts with	E2F6 (interacts with) FUT10	false
113648	interacts with	E2F6 (interacts with) RTF1	false
113649	interacts with	EED (interacts with) ALG9	false
113650	interacts with	EED (interacts with) FAM20B	false
113651	interacts with	EED (interacts with) FUT8	false
113652	interacts with	EED (interacts with) NEU3	false
113653	interacts with	EED (interacts with) GNPNAT1	false
113654	interacts with	EED (interacts with) MAN1A2	false
113655	interacts with	EGR2 (interacts with) MGAT1	false
113656	interacts with	EGR2 (interacts with) ST3GAL5	false
113657	interacts with	EGR2 (interacts with) NAGK	false
113658	interacts with	EGR2 (interacts with) SGSH	false
113659	interacts with	EGR2 (interacts with) NAGA	false
113660	interacts with	EGR2 (interacts with) HPSE	false
113661	interacts with	EGR2 (interacts with) CHST2	false
113662	interacts with	EGR2 (interacts with) GNS	false
113663	interacts with	EGR2 (interacts with) LFNG	false
113664	interacts with	EGR2 (interacts with) EXT1	false
113665	interacts with	EHMT2 (interacts with) MOGS	false
113666	interacts with	EHMT2 (interacts with) IDUA	false
113667	interacts with	EHMT2 (interacts with) POMT1	false
113668	interacts with	EHMT2 (interacts with) B3GALT6	false
113669	interacts with	EHMT2 (interacts with) MAN1B1	false
113670	interacts with	EHMT2 (interacts with) GANAB	false
113671	interacts with	EHMT2 (interacts with) RFNG	false
113672	interacts with	EHMT2 (interacts with) PIGO	false
113673	interacts with	EHMT2 (interacts with) B4GALT7	false
113674	interacts with	EHMT2 (interacts with) B3GAT3	false
113675	interacts with	EHMT2 (interacts with) POMGNT1	false
113676	interacts with	EHMT2 (interacts with) ALG3	false
113677	interacts with	EHMT2 (interacts with) COG1	false
113678	interacts with	EHMT2 (interacts with) MPI	false
113679	interacts with	EHMT2 (interacts with) CHST12	false
113680	interacts with	EHMT2 (interacts with) COG7	false
113681	interacts with	EHMT2 (interacts with) FKRP	false
113682	interacts with	EHMT2 (interacts with) NAGLU	false
113683	interacts with	EHMT2 (interacts with) DPAGT1	false
113684	interacts with	ELF1 (interacts with) COG6	false
113685	interacts with	ELF1 (interacts with) SLC35A5	false
113686	interacts with	ELF1 (interacts with) SLC35A3	false
113687	interacts with	ELF1 (interacts with) MAN1A2	false
113688	interacts with	ELF1 (interacts with) PIGN	false
113689	interacts with	ELF1 (interacts with) GALNT7	false
113690	interacts with	ELF1 (interacts with) SLC35F5	false
113691	interacts with	ELF1 (interacts with) COG5	false
113692	interacts with	ELF1 (interacts with) GNE	false
113693	interacts with	ELF1 (interacts with) LAMP2	false
113694	interacts with	ELF1 (interacts with) PIGK	false
113695	interacts with	ELF1 (interacts with) FAM20B	false
113696	interacts with	ELF1 (interacts with) SLC35B4	false
113697	interacts with	ELF2 (interacts with) COG3	false
113698	interacts with	EOMES (interacts with) LAMP3	false
113699	interacts with	EOMES (interacts with) ST6GAL1	false
113700	interacts with	EOMES (interacts with) PPBP	false
113701	interacts with	EP400 (interacts with) FKTN	false
113702	interacts with	EP400 (interacts with) STT3B	false
113703	interacts with	EP400 (interacts with) PIGO	false
113704	interacts with	EP400 (interacts with) PIGG	false
113705	interacts with	EP400 (interacts with) ALG11	false
113706	interacts with	EP400 (interacts with) FUT2	false
113707	interacts with	EP400 (interacts with) GALNT14	false
113708	interacts with	ERCC3 (interacts with) PIGL	false
113709	interacts with	ERCC3 (interacts with) ALG9	false
113710	interacts with	ERCC6 (interacts with) MAN1A2	false
113711	interacts with	ERCC6 (interacts with) STT3B	false
113712	interacts with	ERCC6 (interacts with) COG5	false
113713	interacts with	ERCC6 (interacts with) COG6	false
113714	interacts with	ERCC6 (interacts with) SLC35F5	false
113715	interacts with	ERCC6 (interacts with) SLC35A3	false
113716	interacts with	ERCC6 (interacts with) SLC35D1	false
113717	interacts with	ERCC6 (interacts with) GFPT1	false
113718	interacts with	ERCC6 (interacts with) HS2ST1	false
113719	interacts with	ERCC6 (interacts with) COG3	false
113720	interacts with	ERF (interacts with) MOGS	false
113721	interacts with	ERF (interacts with) PIGQ	false
113722	interacts with	ERF (interacts with) RFNG	false
113723	interacts with	ERF (interacts with) B4GALT7	false
113724	interacts with	ERF (interacts with) NAGLU	false
113725	interacts with	ERF (interacts with) GPAA1	false
113726	interacts with	ERF (interacts with) ALG12	false
113727	interacts with	ERG (interacts with) FUT1	false
113728	interacts with	ERG (interacts with) B4GALT6	false
113729	interacts with	ERG (interacts with) STT3B	false
113730	interacts with	ERG (interacts with) GALNT7	false
113731	interacts with	ERG (interacts with) PIGL	false
113732	interacts with	ERG (interacts with) CHST12	false
113733	interacts with	ETS1 (interacts with) MGAT4A	false
113734	interacts with	ETS1 (interacts with) ST6GAL1	false
113735	interacts with	ETS1 (interacts with) ST8SIA1	false
113736	interacts with	ETS1 (interacts with) ST3GAL1	false
113737	interacts with	ETS1 (interacts with) GCNT4	false
113738	interacts with	ETS1 (interacts with) B3GAT1	false
113739	interacts with	ETS1 (interacts with) UST	false
113740	interacts with	EZH1 (interacts with) OGT	false
113741	interacts with	EZH1 (interacts with) PIGG	false
113742	interacts with	EZH2 (interacts with) ALG8	false
113743	interacts with	EZH2 (interacts with) PIGN	false
113744	interacts with	FOS (interacts with) NEU1	false
113745	interacts with	FOSL1 (interacts with) NEU4	false
113746	interacts with	FOSL2 (interacts with) B4GALT1	false
113747	interacts with	FOSL2 (interacts with) CHST15	false
113748	interacts with	FOSL2 (interacts with) GNS	false
113749	interacts with	FOSL2 (interacts with) NEU1	false
113750	interacts with	FOSL2 (interacts with) MGAT1	false
113751	interacts with	FOSL2 (interacts with) LFNG	false
113752	interacts with	FOSL2 (interacts with) GAA	false
113753	interacts with	FOSL2 (interacts with) HK3	false
113754	interacts with	FOSL2 (interacts with) NAGK	false
113755	interacts with	FOSL2 (interacts with) SGSH	false
113756	interacts with	FOSL2 (interacts with) GBA	false
113757	interacts with	FOSL2 (interacts with) PMM1	false
113758	interacts with	FOSL2 (interacts with) GM2A	false
113759	interacts with	FOXO1 (interacts with) CHST15	false
113760	interacts with	FOXO1 (interacts with) ST3GAL1	false
113761	interacts with	FOXO1 (interacts with) ST6GAL1	false
113762	interacts with	FOXO1 (interacts with) MAN1C1	false
113763	interacts with	FOXO1 (interacts with) UGCG	false
113764	interacts with	FOXO1 (interacts with) GNPDA1	false
113765	interacts with	FOXP1 (interacts with) MAN1A2	false
113766	interacts with	FOXP1 (interacts with) ALG10B	false
113767	interacts with	FOXP1 (interacts with) B3GALT2	false
113768	interacts with	FOXP1 (interacts with) SLC35A3	false
113769	interacts with	GABPA (interacts with) SLC35A3	false
113770	interacts with	GABPA (interacts with) GNPNAT1	false
113771	interacts with	GAPDH (interacts with) GPI	false
113772	interacts with	GATA2 (interacts with) B3GALNT1	false
113773	interacts with	GATA2 (interacts with) ST6GALNAC6	false
113774	interacts with	GATA2 (interacts with) MAN2A2	false
113775	interacts with	GATA2 (interacts with) FUT6	false
113776	interacts with	GATA2 (interacts with) POMGNT1	false
113777	interacts with	GATA2 (interacts with) FUT2	false
113778	interacts with	GATA2 (interacts with) SULT1C4	false
113779	interacts with	GATA2 (interacts with) CHST12	false
113780	interacts with	GATA2 (interacts with) GMDS	false
113781	interacts with	GATA2 (interacts with) FUT10	false
113782	interacts with	GATA3 (interacts with) GCNT4	false
113783	interacts with	GATA3 (interacts with) B3GNT3	false
113784	interacts with	GATA3 (interacts with) LAMP3	false
113785	interacts with	GATA3 (interacts with) B4GALNT4	false
113786	interacts with	GATA3 (interacts with) ST6GAL1	false
113787	interacts with	GATA3 (interacts with) ST3GAL1	false
113788	interacts with	GATAD1 (interacts with) COG5	false
113789	interacts with	GATAD1 (interacts with) SLC35B4	false
113790	interacts with	GATAD1 (interacts with) SLC35E3	false
113791	interacts with	GLYR1 (interacts with) ALG1	false
113792	interacts with	GLYR1 (interacts with) GALK1	false
113793	interacts with	GMEB2 (interacts with) GPAA1	false
113794	interacts with	GMEB2 (interacts with) B4GALT3	false
113795	interacts with	GMEB2 (interacts with) PIGQ	false
113796	interacts with	GMEB2 (interacts with) B3GAT3	false
113797	interacts with	GPS2 (interacts with) GALK1	false
113798	interacts with	GPS2 (interacts with) NAGLU	false
113799	interacts with	GTF2B (interacts with) DPM1	false
113800	interacts with	GTF2I (interacts with) COG5	false
113801	interacts with	GTF2I (interacts with) SLC35A3	false
113802	interacts with	GTF2I (interacts with) ALG10	false
113803	interacts with	GTF2I (interacts with) GALNT7	false
113804	interacts with	GTF2I (interacts with) ALG9	false
113805	interacts with	GTF2I (interacts with) EXTL2	false
113806	interacts with	GTF3C1 (interacts with) COG8	false
113807	interacts with	GTF3C2 (interacts with) GANAB	false
113808	interacts with	GTF3C2 (interacts with) COG7	false
113809	interacts with	H2AFX (interacts with) DPM2	false
113810	interacts with	H2AFX (interacts with) B3GAT3	false
113811	interacts with	H2AFX (interacts with) B3GALT6	false
113812	interacts with	H2AFX (interacts with) RFNG	false
113813	interacts with	H2AFX (interacts with) GALE	false
113814	interacts with	H2AFX (interacts with) GPI	false
113815	interacts with	H2AFX (interacts with) MOGS	false
113816	interacts with	H2AFX (interacts with) GPAA1	false
113817	interacts with	H2AFX (interacts with) TSTA3	false
113818	interacts with	H2AFX (interacts with) GANAB	false
113819	interacts with	H2AFX (interacts with) DDOST	false
113820	interacts with	H2AFX (interacts with) B4GALT3	false
113821	interacts with	H2AFX (interacts with) GMPPB	false
113822	interacts with	H2AFX (interacts with) NAGLU	false
113823	interacts with	H2AFX (interacts with) B4GALT7	false
113824	interacts with	HCFC1 (interacts with) PIGO	false
113825	interacts with	HCFC1 (interacts with) COG8	false
113826	interacts with	HCFC1 (interacts with) ALG3	false
113827	interacts with	HCFC1 (interacts with) ALG12	false
113828	interacts with	HCFC1 (interacts with) PIGQ	false
113829	interacts with	HCFC1 (interacts with) POMGNT1	false
113830	interacts with	HCFC1 (interacts with) COG7	false
113831	interacts with	HCFC1 (interacts with) GPAA1	false
113832	interacts with	HCFC1 (interacts with) ST3GAL3	false
113833	interacts with	HCFC1 (interacts with) SLC35B2	false
113834	interacts with	HDAC1 (interacts with) MPI	false
113835	interacts with	HDAC2 (interacts with) GNE	false
113836	interacts with	HDAC2 (interacts with) PIGW	false
113837	interacts with	HDAC2 (interacts with) DPM1	false
113838	interacts with	HDAC2 (interacts with) GNPNAT1	false
113839	interacts with	HDAC2 (interacts with) ALG9	false
113840	interacts with	HDAC2 (interacts with) EXTL2	false
113841	interacts with	HDAC2 (interacts with) UGP2	false
113842	interacts with	HDAC2 (interacts with) ALG8	false
113843	interacts with	HDAC2 (interacts with) PIGN	false
113844	interacts with	HDAC2 (interacts with) RTF1	false
113845	interacts with	HDAC2 (interacts with) PIGY	false
113846	interacts with	HDAC2 (interacts with) SLC35A3	false
113847	interacts with	HDAC3 (interacts with) SLC35A4	false
113848	interacts with	HDAC3 (interacts with) GM2A	false
113849	interacts with	HDAC6 (interacts with) MAN2A2	false
113850	interacts with	HDAC6 (interacts with) POFUT2	false
113851	interacts with	HDAC6 (interacts with) MOGS	false
113852	interacts with	HDAC6 (interacts with) COG7	false
113853	interacts with	HDAC6 (interacts with) RFNG	false
113854	interacts with	HDAC6 (interacts with) PIGQ	false
113855	interacts with	HDAC6 (interacts with) FKRP	false
113856	interacts with	HDAC6 (interacts with) PIGO	false
113857	interacts with	HDAC6 (interacts with) XYLT2	false
113858	interacts with	HDAC6 (interacts with) B3GAT3	false
113859	interacts with	HDAC6 (interacts with) SLC35C2	false
113860	interacts with	HDAC6 (interacts with) ST3GAL3	false
113861	interacts with	HDAC6 (interacts with) GALT	false
113862	interacts with	HDAC6 (interacts with) MAN1B1	false
113863	interacts with	HDAC6 (interacts with) B4GALT7	false
113864	interacts with	HDAC6 (interacts with) ALG12	false
113865	interacts with	HDAC6 (interacts with) GANAB	false
113866	interacts with	HDAC6 (interacts with) B4GALT3	false
113867	interacts with	HDAC6 (interacts with) GMPPB	false
113868	interacts with	HDAC6 (interacts with) DPAGT1	false
113869	interacts with	HDAC6 (interacts with) SLC35B2	false
113870	interacts with	HDAC6 (interacts with) CHST12	false
113871	interacts with	HDAC6 (interacts with) NAGLU	false
113872	interacts with	HDAC6 (interacts with) PIGG	false
113873	interacts with	HDAC6 (interacts with) CHPF2	false
113874	interacts with	HDAC6 (interacts with) ALG3	false
113875	interacts with	HDAC6 (interacts with) HYAL3	false
113876	interacts with	HDAC6 (interacts with) GALE	false
113877	interacts with	HDAC6 (interacts with) COG8	false
113878	interacts with	HDAC6 (interacts with) ARSA	false
113879	interacts with	HECTD1 (interacts with) FAM20B	false
113880	interacts with	HIF1A (interacts with) CSGALNACT1	false
113881	interacts with	HINFP (interacts with) DPAGT1	false
113882	interacts with	HINFP (interacts with) GALT	false
113883	interacts with	HINFP (interacts with) COG8	false
113884	interacts with	HINFP (interacts with) PIGO	false
113885	interacts with	HIRA (interacts with) PIGO	false
113886	interacts with	HIRA (interacts with) ALG12	false
113887	interacts with	HIRA (interacts with) GANAB	false
113888	interacts with	HIRA (interacts with) TSTA3	false
113889	interacts with	HIRA (interacts with) PIGQ	false
113890	interacts with	HIRA (interacts with) COG8	false
113891	interacts with	HIRA (interacts with) COG7	false
113892	interacts with	HIRA (interacts with) ST6GALNAC4	false
113893	interacts with	HIRA (interacts with) POMGNT1	false
113894	interacts with	HIRA (interacts with) MFNG	false
113895	interacts with	HIRA (interacts with) ST6GALNAC6	false
113896	interacts with	HIRA (interacts with) SLC35C1	false
113897	interacts with	HIRA (interacts with) B4GALT2	false
113898	interacts with	HIRA (interacts with) DPAGT1	false
113899	interacts with	HIRA (interacts with) MGAT3	false
113900	interacts with	HIRA (interacts with) MAN2A2	false
113901	interacts with	HIRA (interacts with) ALG1	false
113902	interacts with	HIRA (interacts with) MAN1B1	false
113903	interacts with	HIRA (interacts with) GPAA1	false
113904	interacts with	HIRA (interacts with) DPM2	false
113905	interacts with	HOXA2 (interacts with) CHST4	false
113906	interacts with	HOXA9 (interacts with) ST8SIA6	false
113907	interacts with	IKZF1 (interacts with) SLC35A5	false
113908	interacts with	ING2 (interacts with) DPM1	false
113909	interacts with	ING5 (interacts with) PIGG	false
113910	interacts with	ING5 (interacts with) FUT10	false
113911	interacts with	INO80 (interacts with) ALG11	false
113912	interacts with	INTS3 (interacts with) PIGO	false
113913	interacts with	INTS3 (interacts with) POMGNT1	false
113914	interacts with	INTS3 (interacts with) GALT	false
113915	interacts with	INTS3 (interacts with) NEU3	false
113916	interacts with	IRF2 (interacts with) ST8SIA4	false
113917	interacts with	IRF2 (interacts with) LIPA	false
113918	interacts with	IRF3 (interacts with) B3GAT3	false
113919	interacts with	IRF3 (interacts with) RFNG	false
113920	interacts with	IRF3 (interacts with) PIGQ	false
113921	interacts with	IRF3 (interacts with) MOGS	false
113922	interacts with	IRF3 (interacts with) GALT	false
113923	interacts with	IRF3 (interacts with) POFUT2	false
113924	interacts with	IRF3 (interacts with) GPAA1	false
113925	interacts with	IRF3 (interacts with) MAN1B1	false
113926	interacts with	IRF3 (interacts with) POMGNT1	false
113927	interacts with	IRF3 (interacts with) ARSA	false
113928	interacts with	IRF3 (interacts with) NAGLU	false
113929	interacts with	IRF3 (interacts with) ALG12	false
113930	interacts with	IRF3 (interacts with) MAN2A2	false
113931	interacts with	IRF3 (interacts with) XYLT2	false
113932	interacts with	IRF4 (interacts with) ST6GAL1	false
113933	interacts with	IRF4 (interacts with) LAMP3	false
113934	interacts with	IRF4 (interacts with) NAGK	false
113935	interacts with	IRF4 (interacts with) UGCG	false
113936	interacts with	IRF4 (interacts with) CHST15	false
113937	interacts with	IRF4 (interacts with) GCNT4	false
113938	interacts with	IRF4 (interacts with) SULF2	false
113939	interacts with	IRF4 (interacts with) EXT1	false
113940	interacts with	IRF5 (interacts with) HK3	false
113941	interacts with	IRF5 (interacts with) MAN2B1	false
113942	interacts with	IRF5 (interacts with) MGAT1	false
113943	interacts with	IRF5 (interacts with) GM2A	false
113944	interacts with	IRF5 (interacts with) NAAA	false
113945	interacts with	IRF5 (interacts with) CTSA	false
113946	interacts with	IRF5 (interacts with) NAGA	false
113947	interacts with	IRF5 (interacts with) B3GALT4	false
113948	interacts with	IRF5 (interacts with) LFNG	false
113949	interacts with	IRF5 (interacts with) GAA	false
113950	interacts with	IRF5 (interacts with) SGSH	false
113951	interacts with	IRF5 (interacts with) B4GALT1	false
113952	interacts with	IRF5 (interacts with) CHST15	false
113953	interacts with	IRF5 (interacts with) GBA	false
113954	interacts with	IRF5 (interacts with) NDST1	false
113955	interacts with	IRF5 (interacts with) SULF2	false
113956	interacts with	IRF5 (interacts with) B3GNT8	false
113957	interacts with	IRF5 (interacts with) SLC35A4	false
113958	interacts with	IRF5 (interacts with) GLB1	false
113959	interacts with	IRF5 (interacts with) PMM1	false
113960	interacts with	IRF8 (interacts with) HK3	false
113961	interacts with	IRF8 (interacts with) LIPA	false
113962	interacts with	IRF8 (interacts with) FUCA1	false
113963	interacts with	IRF8 (interacts with) NAAA	false
113964	interacts with	IRF8 (interacts with) GM2A	false
113965	interacts with	IRF8 (interacts with) NAGA	false
113966	interacts with	IRF8 (interacts with) HEXB	false
113967	interacts with	IRF8 (interacts with) GNS	false
113968	interacts with	JARID2 (interacts with) UGGT1	false
113969	interacts with	JARID2 (interacts with) GALNT1	false
113970	interacts with	JDP2 (interacts with) MGAT1	false
113971	interacts with	JDP2 (interacts with) CTSA	false
113972	interacts with	JMJD1C (interacts with) GALNT4	false
113973	interacts with	JMJD1C (interacts with) COG5	false
113974	interacts with	JUNB (interacts with) MGAT1	false
113975	interacts with	JUNB (interacts with) SGSH	false
113976	interacts with	JUNB (interacts with) NEU1	false
113977	interacts with	JUNB (interacts with) HK3	false
113978	interacts with	JUNB (interacts with) HPSE	false
113979	interacts with	JUNB (interacts with) NAGK	false
113980	interacts with	JUNB (interacts with) NAGA	false
113981	interacts with	JUNB (interacts with) PMM1	false
113982	interacts with	JUND (interacts with) DPM3	false
113983	interacts with	JUND (interacts with) RFNG	false
113984	interacts with	JUND (interacts with) DPM2	false
113985	interacts with	JUND (interacts with) B3GAT3	false
113986	interacts with	JUND (interacts with) IDUA	false
113987	interacts with	JUND (interacts with) NEU4	false
113988	interacts with	JUND (interacts with) FUT5	false
113989	interacts with	JUND (interacts with) GPAA1	false
113990	interacts with	KAT2B (interacts with) CSGALNACT2	false
113991	interacts with	KDM1A (interacts with) PIGW	false
113992	interacts with	KDM1A (interacts with) FUT8	false
113993	interacts with	KDM1A (interacts with) SLC35D1	false
113994	interacts with	KDM1A (interacts with) FUT10	false
113995	interacts with	KDM1A (interacts with) RTF1	false
113996	interacts with	KDM1A (interacts with) MPI	false
113997	interacts with	KDM1B (interacts with) LIPA	false
113998	interacts with	KDM2B (interacts with) PIGO	false
113999	interacts with	KDM2B (interacts with) XYLT2	false
114000	interacts with	KDM2B (interacts with) COG8	false
114001	interacts with	KDM2B (interacts with) HS3ST3B1	false
114002	interacts with	KDM3A (interacts with) FKTN	false
114003	interacts with	KDM3A (interacts with) COG3	false
114004	interacts with	KDM3A (interacts with) SLC35A3	false
114005	interacts with	KDM3A (interacts with) COG6	false
114006	interacts with	KDM3A (interacts with) EXTL2	false
114007	interacts with	KDM3A (interacts with) ALG13	false
114008	interacts with	KDM3A (interacts with) PIGG	false
114009	interacts with	KDM3A (interacts with) ALG9	false
114010	interacts with	KDM3A (interacts with) GAL3ST4	false
114011	interacts with	KDM3A (interacts with) FUT8	false
114012	interacts with	KDM3A (interacts with) EXT2	false
114013	interacts with	KDM4A (interacts with) PIGO	false
114014	interacts with	KDM4A (interacts with) PIGV	false
114015	interacts with	KDM4C (interacts with) MAN1A2	false
114016	interacts with	KDM4C (interacts with) COG5	false
114017	interacts with	KDM4C (interacts with) C1GALT1	false
114018	interacts with	KDM4C (interacts with) GALNT10	false
114019	interacts with	KDM5A (interacts with) ALG10	false
114020	interacts with	KDM5A (interacts with) ALG10B	false
114021	interacts with	KDM5A (interacts with) SLC35A3	false
114022	interacts with	KDM5A (interacts with) COG5	false
114023	interacts with	KDM5A (interacts with) SLC35F5	false
114024	interacts with	KDM5A (interacts with) HS2ST1	false
114025	interacts with	KDM5A (interacts with) COG3	false
114026	interacts with	KDM5B (interacts with) PIGN	false
114027	interacts with	KDM5B (interacts with) GANAB	false
114028	interacts with	KDM5B (interacts with) COG6	false
114029	interacts with	KDM5B (interacts with) ALG9	false
114030	interacts with	KDM5B (interacts with) UXS1	false
114031	interacts with	KDM5C (interacts with) FKRP	false
114032	interacts with	KDM5C (interacts with) POMT1	false
114033	interacts with	KDM5C (interacts with) MAN1B1	false
114034	interacts with	KDM5C (interacts with) XYLT2	false
114035	interacts with	KDM5C (interacts with) POMGNT1	false
114036	interacts with	KDM5C (interacts with) PIGQ	false
114037	interacts with	KDM5C (interacts with) CHST12	false
114038	interacts with	KDM6B (interacts with) MGAT4B	false
114039	interacts with	KDM6B (interacts with) FKRP	false
114040	interacts with	KDM6B (interacts with) MAN1B1	false
114041	interacts with	KLF1 (interacts with) MGAT3	false
114042	interacts with	KLF1 (interacts with) FUT1	false
114043	interacts with	KLF1 (interacts with) B3GNT9	false
114044	interacts with	KLF1 (interacts with) ST6GALNAC4	false
114045	interacts with	KLF4 (interacts with) HPSE	false
114046	interacts with	KLF4 (interacts with) B4GALT1	false
114047	interacts with	KLF4 (interacts with) MGAT1	false
114048	interacts with	KLF4 (interacts with) HK1	false
114049	interacts with	KLF4 (interacts with) NAGA	false
114050	interacts with	KLF4 (interacts with) SULF2	false
114051	interacts with	KLF4 (interacts with) HEXB	false
114052	interacts with	KLF4 (interacts with) NAAA	false
114053	interacts with	KLF4 (interacts with) GNS	false
114054	interacts with	KLF4 (interacts with) NAGK	false
114055	interacts with	KLF4 (interacts with) PMM1	false
114056	interacts with	KLF4 (interacts with) GM2A	false
114057	interacts with	KLF4 (interacts with) GAA	false
114058	interacts with	KLF4 (interacts with) NPL	false
114059	interacts with	KLF4 (interacts with) NEU1	false
114060	interacts with	KLF4 (interacts with) B3GALT4	false
114061	interacts with	KLF4 (interacts with) GCNT2	false
114062	interacts with	KLF4 (interacts with) GLB1	false
114063	interacts with	KLF4 (interacts with) GBA	false
114064	interacts with	L3MBTL2 (interacts with) B3GALT6	false
114065	interacts with	L3MBTL2 (interacts with) POMGNT1	false
114066	interacts with	LDB1 (interacts with) PIGQ	false
114067	interacts with	LDB1 (interacts with) PIGL	false
114068	interacts with	LDB1 (interacts with) MGAT4B	false
114069	interacts with	LDB1 (interacts with) PIGO	false
114070	interacts with	LDB1 (interacts with) ST6GALNAC6	false
114071	interacts with	LDB1 (interacts with) ST6GALNAC1	false
114072	interacts with	LEF1 (interacts with) ST8SIA1	false
114073	interacts with	LEF1 (interacts with) DSEL	false
114074	interacts with	LEF1 (interacts with) GCNT4	false
114075	interacts with	LEF1 (interacts with) B3GAT1	false
114076	interacts with	LEF1 (interacts with) LAMP3	false
114077	interacts with	LEO1 (interacts with) PIGW	false
114078	interacts with	LIN9 (interacts with) ALG10B	false
114079	interacts with	LIN9 (interacts with) HS2ST1	false
114080	interacts with	LYL1 (interacts with) MFNG	false
114081	interacts with	LYL1 (interacts with) ST6GALNAC6	false
114082	interacts with	LYL1 (interacts with) HYAL2	false
114083	interacts with	LYL1 (interacts with) DPM3	false
114084	interacts with	LYL1 (interacts with) PIGQ	false
114085	interacts with	LYL1 (interacts with) FKRP	false
114086	interacts with	LYL1 (interacts with) ALG12	false
114087	interacts with	LYL1 (interacts with) B4GALT3	false
114088	interacts with	LYL1 (interacts with) COG8	false
114089	interacts with	MAFB (interacts with) NPL	false
114090	interacts with	MAFB (interacts with) B4GALT1	false
114091	interacts with	MAFG (interacts with) GAA	false
114092	interacts with	MAFK (interacts with) IDUA	false
114093	interacts with	MAFK (interacts with) CHPF2	false
114094	interacts with	MAFK (interacts with) CHST12	false
114095	interacts with	MAFK (interacts with) B3GAT3	false
114096	interacts with	MAFK (interacts with) ALG12	false
114097	interacts with	MAX (interacts with) EXTL2	false
114098	interacts with	MAZ (interacts with) PIGQ	false
114099	interacts with	MAZ (interacts with) B4GALT2	false
114100	interacts with	MAZ (interacts with) DPM2	false
114101	interacts with	MAZ (interacts with) B3GALT6	false
114102	interacts with	MAZ (interacts with) B3GAT3	false
114103	interacts with	MAZ (interacts with) RFNG	false
114104	interacts with	MAZ (interacts with) ALG3	false
114105	interacts with	MAZ (interacts with) GALK1	false
114106	interacts with	MAZ (interacts with) MOGS	false
114107	interacts with	MAZ (interacts with) GPAA1	false
114108	interacts with	MAZ (interacts with) B4GALT3	false
114109	interacts with	MAZ (interacts with) TSTA3	false
114110	interacts with	MAZ (interacts with) DPM3	false
114111	interacts with	MAZ (interacts with) CHST14	false
114112	interacts with	MAZ (interacts with) SLC35B2	false
114113	interacts with	MAZ (interacts with) B4GALT7	false
114114	interacts with	MAZ (interacts with) SLC35C2	false
114115	interacts with	MAZ (interacts with) DDOST	false
114116	interacts with	MAZ (interacts with) ST3GAL3	false
114117	interacts with	MAZ (interacts with) ALG12	false
114118	interacts with	MAZ (interacts with) SLC35A2	false
114119	interacts with	MAZ (interacts with) MAN1B1	false
114120	interacts with	MAZ (interacts with) GANAB	false
114121	interacts with	MAZ (interacts with) NAGLU	false
114122	interacts with	MAZ (interacts with) POMT2	false
114123	interacts with	MAZ (interacts with) IDUA	false
114124	interacts with	MAZ (interacts with) CHPF2	false
114125	interacts with	MBD2 (interacts with) CHST15	false
114126	interacts with	MBD2 (interacts with) GNS	false
114127	interacts with	MBD2 (interacts with) HEXB	false
114128	interacts with	MBD2 (interacts with) NAGA	false
114129	interacts with	MBD2 (interacts with) B4GALT1	false
114130	interacts with	MBD2 (interacts with) NAAA	false
114131	interacts with	MBD2 (interacts with) GM2A	false
114132	interacts with	MBD2 (interacts with) LFNG	false
114133	interacts with	MBD2 (interacts with) ASAH1	false
114134	interacts with	MBD2 (interacts with) SGSH	false
114135	interacts with	MBD2 (interacts with) FUCA1	false
114136	interacts with	MBD2 (interacts with) ST8SIA4	false
114137	interacts with	MBD2 (interacts with) MGAT1	false
114138	interacts with	MECP2 (interacts with) FKTN	false
114139	interacts with	MECP2 (interacts with) SLC35F5	false
114140	interacts with	MECP2 (interacts with) FUT10	false
114141	interacts with	MECP2 (interacts with) ALG10	false
114142	interacts with	MECP2 (interacts with) OGT	false
114143	interacts with	MECP2 (interacts with) ALG13	false
114144	interacts with	MECP2 (interacts with) PIGO	false
114145	interacts with	MECP2 (interacts with) FUT2	false
114146	interacts with	MECP2 (interacts with) PIGG	false
114147	interacts with	MECP2 (interacts with) ALG11	false
114148	interacts with	MECP2 (interacts with) SLC35D1	false
114149	interacts with	MECP2 (interacts with) COG8	false
114150	interacts with	MECP2 (interacts with) ALG10B	false
114151	interacts with	MECP2 (interacts with) POMGNT1	false
114152	interacts with	MECP2 (interacts with) COG3	false
114153	interacts with	MED12 (interacts with) NEU3	false
114154	interacts with	MED12 (interacts with) GANAB	false
114155	interacts with	MED12 (interacts with) MAN2A2	false
114156	interacts with	MED12 (interacts with) PIGO	false
114157	interacts with	MED12 (interacts with) COG7	false
114158	interacts with	MED12 (interacts with) COG8	false
114159	interacts with	MED12 (interacts with) ALG11	false
114160	interacts with	MED12 (interacts with) ST6GALNAC6	false
114161	interacts with	MED12 (interacts with) EXT2	false
114162	interacts with	MED12 (interacts with) POMGNT1	false
114163	interacts with	MED12 (interacts with) PIGG	false
114164	interacts with	MED12 (interacts with) COG1	false
114165	interacts with	MED12 (interacts with) ALG12	false
114166	interacts with	MED12 (interacts with) MAN1B1	false
114167	interacts with	MED12 (interacts with) MPI	false
114168	interacts with	MED12 (interacts with) B3GNT9	false
114169	interacts with	MED12 (interacts with) FUT2	false
114170	interacts with	MED12 (interacts with) FUT1	false
114171	interacts with	MEF2A (interacts with) UGCG	false
114172	interacts with	MEF2A (interacts with) DSE	false
114173	interacts with	MEF2A (interacts with) MGAT4A	false
114174	interacts with	MEF2A (interacts with) CSGALNACT1	false
114175	interacts with	MEF2A (interacts with) ST3GAL5	false
114176	interacts with	MEF2A (interacts with) HS3ST1	false
114177	interacts with	MEF2C (interacts with) ST3GAL1	false
114178	interacts with	MEF2C (interacts with) ST6GAL1	false
114179	interacts with	MEF2C (interacts with) LIPA	false
114180	interacts with	MEF2D (interacts with) B4GALT1	false
114181	interacts with	MEIS1 (interacts with) UST	false
114182	interacts with	MEIS1 (interacts with) ST8SIA6	false
114183	interacts with	MLLT1 (interacts with) GALNT2	false
114184	interacts with	MLLT1 (interacts with) B3GAT3	false
114185	interacts with	MLLT1 (interacts with) CHPF2	false
114186	interacts with	MLLT1 (interacts with) GANAB	false
114187	interacts with	MNT (interacts with) MOGS	false
114188	interacts with	MNT (interacts with) B3GAT3	false
114189	interacts with	MNT (interacts with) MGAT4B	false
114190	interacts with	MNT (interacts with) MGAT1	false
114191	interacts with	MNT (interacts with) MAN1B1	false
114192	interacts with	MNT (interacts with) B3GALT4	false
114193	interacts with	MNT (interacts with) MAN2B1	false
114194	interacts with	MNT (interacts with) SLC35A4	false
114195	interacts with	MRE11A (interacts with) NEU3	false
114196	interacts with	MYB (interacts with) UGP2	false
114197	interacts with	MYB (interacts with) EXTL2	false
114198	interacts with	MYB (interacts with) ALG9	false
114199	interacts with	MYB (interacts with) COG6	false
114200	interacts with	MYB (interacts with) FAM20B	false
114201	interacts with	MYB (interacts with) GALNT7	false
114202	interacts with	MYB (interacts with) PIGV	false
114203	interacts with	MYB (interacts with) UXS1	false
114204	interacts with	MYB (interacts with) GNE	false
114205	interacts with	MYB (interacts with) FUT8	false
114206	interacts with	MYB (interacts with) PIGC	false
114207	interacts with	MYB (interacts with) PIGW	false
114208	interacts with	MYBL2 (interacts with) RPN2	false
114209	interacts with	MYBL2 (interacts with) GPAA1	false
114210	interacts with	MYBL2 (interacts with) GALE	false
114211	interacts with	MYBL2 (interacts with) TSTA3	false
114212	interacts with	MYC (interacts with) SLC35F2	false
114213	interacts with	MYC (interacts with) GNPNAT1	false
114214	interacts with	MYC (interacts with) PIGW	false
114215	interacts with	MYC (interacts with) B3GALT6	false
114216	interacts with	MYC (interacts with) FUT10	false
114217	interacts with	MYC (interacts with) GALNT2	false
114218	interacts with	MYC (interacts with) MPI	false
114219	interacts with	MYC (interacts with) ALG3	false
114220	interacts with	MYC (interacts with) DPAGT1	false
114221	interacts with	MYC (interacts with) B4GALT2	false
114222	interacts with	MYC (interacts with) NEU3	false
114223	interacts with	MYC (interacts with) GANAB	false
114224	interacts with	MYC (interacts with) PIGN	false
114225	interacts with	MYC (interacts with) COG8	false
114226	interacts with	MZF1 (interacts with) FKRP	false
114227	interacts with	MZF1 (interacts with) MOGS	false
114228	interacts with	MZF1 (interacts with) MAN2A2	false
114229	interacts with	MZF1 (interacts with) GPAA1	false
114230	interacts with	MZF1 (interacts with) ALG12	false
114231	interacts with	MZF1 (interacts with) PIGO	false
114232	interacts with	MZF1 (interacts with) ST6GALNAC6	false
114233	interacts with	MZF1 (interacts with) SLC35B2	false
114234	interacts with	NCAPG (interacts with) ALG8	false
114235	interacts with	NCAPG (interacts with) PIGN	false
114236	interacts with	NCOR2 (interacts with) MFNG	false
114237	interacts with	NCOR2 (interacts with) RENBP	false
114238	interacts with	NCOR2 (interacts with) PMM1	false
114239	interacts with	NCOR2 (interacts with) CHST7	false
114240	interacts with	NCOR2 (interacts with) GAA	false
114241	interacts with	NCOR2 (interacts with) EXTL3	false
114242	interacts with	NCOR2 (interacts with) MGAT1	false
114243	interacts with	NCOR2 (interacts with) ST6GALNAC6	false
114244	interacts with	NCOR2 (interacts with) ST6GALNAC4	false
114245	interacts with	NFATC1 (interacts with) ST6GALNAC6	false
114246	interacts with	NFATC1 (interacts with) SLC35E4	false
114247	interacts with	NFE2 (interacts with) CHST12	false
114248	interacts with	NFE2 (interacts with) PIGC	false
114249	interacts with	NFE2 (interacts with) XYLT2	false
114250	interacts with	NFE2 (interacts with) MGAT4B	false
114251	interacts with	NFE2 (interacts with) CHPF2	false
114252	interacts with	NFE2 (interacts with) MAN2A2	false
114253	interacts with	NFIC (interacts with) PIGO	false
114254	interacts with	NFIC (interacts with) ALG3	false
114255	interacts with	NFIC (interacts with) MGAT4B	false
114256	interacts with	NFIC (interacts with) NAGLU	false
114257	interacts with	NFIC (interacts with) CHPF2	false
114258	interacts with	NFYA (interacts with) STT3B	false
114259	interacts with	NFYA (interacts with) NEU3	false
114260	interacts with	NFYA (interacts with) GALK2	false
114261	interacts with	NFYA (interacts with) OGT	false
114262	interacts with	NFYA (interacts with) GFPT1	false
114263	interacts with	NFYA (interacts with) SLC35A3	false
114264	interacts with	NFYA (interacts with) ALG9	false
114265	interacts with	NFYA (interacts with) SLC35D1	false
114266	interacts with	NFYA (interacts with) FUT2	false
114267	interacts with	NFYB (interacts with) B4GALT6	false
114268	interacts with	NFYB (interacts with) PIGY	false
114269	interacts with	NFYB (interacts with) FAM20B	false
114270	interacts with	NFYB (interacts with) COG6	false
114271	interacts with	NFYB (interacts with) ALG9	false
114272	interacts with	NFYB (interacts with) UGP2	false
114273	interacts with	NFYB (interacts with) PIGW	false
114274	interacts with	NFYB (interacts with) PIGP	false
114275	interacts with	NFYB (interacts with) GNE	false
114276	interacts with	NFYC (interacts with) GALE	false
114277	interacts with	NIPBL (interacts with) COG5	false
114278	interacts with	NOTCH1 (interacts with) HS6ST1	false
114279	interacts with	NOTCH1 (interacts with) COG8	false
114280	interacts with	NOTCH1 (interacts with) FKRP	false
114281	interacts with	NOTCH1 (interacts with) CHST12	false
114282	interacts with	NOTCH1 (interacts with) ST6GALNAC6	false
114283	interacts with	NOTCH1 (interacts with) MGAT5	false
114284	interacts with	NOTCH1 (interacts with) PIGG	false
114285	interacts with	NOTCH1 (interacts with) ALG12	false
114286	interacts with	NOTCH1 (interacts with) IDS	false
114287	interacts with	NOTCH1 (interacts with) COG1	false
114288	interacts with	NOTCH1 (interacts with) GALT	false
114289	interacts with	NPAT (interacts with) SLC35A3	false
114290	interacts with	NR1H3 (interacts with) POFUT2	false
114291	interacts with	NR2C2 (interacts with) STT3B	false
114292	interacts with	NR2C2 (interacts with) FKTN	false
114293	interacts with	NR2C2 (interacts with) OGT	false
114294	interacts with	NR2C2 (interacts with) ALG10B	false
114295	interacts with	NR2C2 (interacts with) COG3	false
114296	interacts with	NR2C2 (interacts with) COG5	false
114297	interacts with	NR2C2 (interacts with) SLC35A3	false
114298	interacts with	NR2C2 (interacts with) SLC35D1	false
114299	interacts with	NR2C2 (interacts with) PIGO	false
114300	interacts with	NR2C2 (interacts with) PIGG	false
114301	interacts with	NR2C2 (interacts with) ALG11	false
114302	interacts with	NR2C2 (interacts with) PIGL	false
114303	interacts with	NR2C2 (interacts with) B4GALT6	false
114304	interacts with	PAX5 (interacts with) ST3GAL1	false
114305	interacts with	PBX3 (interacts with) CHST4	false
114306	interacts with	PBX3 (interacts with) ST8SIA6	false
114307	interacts with	PBX3 (interacts with) UGGT2	false
114308	interacts with	PBX3 (interacts with) PIGF	false
114309	interacts with	PCGF6 (interacts with) PIGW	false
114310	interacts with	PHF6 (interacts with) FAM20B	false
114311	interacts with	PHF6 (interacts with) SLC35F5	false
114312	interacts with	PHF8 (interacts with) PIGO	false
114313	interacts with	PHF8 (interacts with) COG8	false
114314	interacts with	PHF8 (interacts with) COG7	false
114315	interacts with	PHF8 (interacts with) PIGG	false
114316	interacts with	PHF8 (interacts with) FKRP	false
114317	interacts with	PIAS1 (interacts with) SLC35A3	false
114318	interacts with	PIAS1 (interacts with) COG5	false
114319	interacts with	PIAS1 (interacts with) GALNT4	false
114320	interacts with	PIAS1 (interacts with) GLCE	false
114321	interacts with	PIAS1 (interacts with) PAPSS2	false
114322	interacts with	PIAS4 (interacts with) SLC35A4	false
114323	interacts with	PML (interacts with) ALG3	false
114324	interacts with	PML (interacts with) COG1	false
114325	interacts with	PML (interacts with) B4GALT7	false
114326	interacts with	PML (interacts with) MOGS	false
114327	interacts with	PML (interacts with) GALT	false
114328	interacts with	PML (interacts with) MPI	false
114329	interacts with	PML (interacts with) ALG12	false
114330	interacts with	PML (interacts with) XYLT2	false
114331	interacts with	PML (interacts with) MAN1B1	false
114332	interacts with	PML (interacts with) ST6GALNAC6	false
114333	interacts with	PML (interacts with) POMGNT1	false
114334	interacts with	PML (interacts with) FUT6	false
114335	interacts with	PML (interacts with) COG8	false
114336	interacts with	PML (interacts with) RFNG	false
114337	interacts with	PML (interacts with) POFUT2	false
114338	interacts with	PML (interacts with) MAN2A2	false
114339	interacts with	PML (interacts with) PIGO	false
114340	interacts with	PML (interacts with) B3GAT3	false
114341	interacts with	PML (interacts with) B4GALT3	false
114342	interacts with	POLR2B (interacts with) MAN1A2	false
114343	interacts with	POLR2B (interacts with) MAN2A1	false
114344	interacts with	POLR2B (interacts with) PIGN	false
114345	interacts with	POLR2B (interacts with) COG5	false
114346	interacts with	POLR2B (interacts with) PIGW	false
114347	interacts with	POLR2B (interacts with) GNPNAT1	false
114348	interacts with	POLR2B (interacts with) HS2ST1	false
114349	interacts with	POLR3A (interacts with) MGAT5	false
114350	interacts with	POLR3A (interacts with) NEU3	false
114351	interacts with	POLR3A (interacts with) PIGN	false
114352	interacts with	POLR3A (interacts with) SLC35D1	false
114353	interacts with	POLR3A (interacts with) GFPT1	false
114354	interacts with	POLR3A (interacts with) COG6	false
114355	interacts with	POLR3A (interacts with) PIGG	false
114356	interacts with	POLR3A (interacts with) GNE	false
114357	interacts with	POLR3A (interacts with) ALG11	false
114358	interacts with	POLR3D (interacts with) GANAB	false
114359	interacts with	POLR3D (interacts with) ALG11	false
114360	interacts with	POLR3D (interacts with) POMGNT1	false
114361	interacts with	POLR3D (interacts with) NEU3	false
114362	interacts with	POLR3D (interacts with) PIGO	false
114363	interacts with	POLR3D (interacts with) MPI	false
114364	interacts with	POLR3D (interacts with) B4GALT6	false
114365	interacts with	POLR3D (interacts with) FUT2	false
114366	interacts with	POLR3D (interacts with) MGAT5	false
114367	interacts with	POLR3D (interacts with) ST3GAL3	false
114368	interacts with	POLR3D (interacts with) PIGL	false
114369	interacts with	PRDM1 (interacts with) ST8SIA1	false
114370	interacts with	PRDM1 (interacts with) LAMP3	false
114371	interacts with	PRDM1 (interacts with) B3GAT1	false
114372	interacts with	PRDM4 (interacts with) MGAT5	false
114373	interacts with	PSIP1 (interacts with) STT3B	false
114374	interacts with	PSIP1 (interacts with) MAN1A2	false
114375	interacts with	RARA (interacts with) LFNG	false
114376	interacts with	RARA (interacts with) NAGA	false
114377	interacts with	RARA (interacts with) GLB1	false
114378	interacts with	RARA (interacts with) MGAT1	false
114379	interacts with	RARA (interacts with) NAGK	false
114380	interacts with	RARA (interacts with) NEU1	false
114381	interacts with	RARA (interacts with) B3GALT4	false
114382	interacts with	RB1 (interacts with) SLC35A5	false
114383	interacts with	RBBP5 (interacts with) MAN1A2	false
114384	interacts with	RBBP5 (interacts with) COG5	false
114385	interacts with	RBBP5 (interacts with) SLC35A3	false
114386	interacts with	RBBP5 (interacts with) PIGN	false
114387	interacts with	RBBP5 (interacts with) HS2ST1	false
114388	interacts with	RBBP5 (interacts with) COG6	false
114389	interacts with	RBBP5 (interacts with) MGAT2	false
114390	interacts with	RBBP5 (interacts with) FUT8	false
114391	interacts with	RBBP5 (interacts with) B3GALNT1	false
114392	interacts with	RBBP5 (interacts with) PIGW	false
114393	interacts with	RBBP5 (interacts with) GALK2	false
114394	interacts with	RBCK1 (interacts with) MOGS	false
114395	interacts with	RBCK1 (interacts with) GALT	false
114396	interacts with	RBCK1 (interacts with) B4GALT3	false
114397	interacts with	RBL2 (interacts with) SLC35A3	false
114398	interacts with	RBL2 (interacts with) FPGT	false
114399	interacts with	RBL2 (interacts with) C1GALT1	false
114400	interacts with	RBPJ (interacts with) CTBS	false
114401	interacts with	RCOR1 (interacts with) SLC35A3	false
114402	interacts with	RCOR1 (interacts with) MAN2A1	false
114403	interacts with	RCOR1 (interacts with) MAN1A2	false
114404	interacts with	RCOR1 (interacts with) UGGT1	false
114405	interacts with	RCOR1 (interacts with) GFPT1	false
114406	interacts with	RCOR1 (interacts with) FAM20B	false
114407	interacts with	RELA (interacts with) B3GAT3	false
114408	interacts with	RELA (interacts with) MGAT4B	false
114409	interacts with	RELA (interacts with) ST6GALNAC6	false
114410	interacts with	RELA (interacts with) B4GALT3	false
114411	interacts with	RELA (interacts with) MFNG	false
114412	interacts with	RELA (interacts with) ALG12	false
114413	interacts with	RELA (interacts with) RFNG	false
114414	interacts with	RELA (interacts with) GPAA1	false
114415	interacts with	RELA (interacts with) FKRP	false
114416	interacts with	RELA (interacts with) DPM3	false
114417	interacts with	RFX1 (interacts with) MOGS	false
114418	interacts with	RFX1 (interacts with) PIGO	false
114419	interacts with	RFX1 (interacts with) GALK1	false
114420	interacts with	RFX1 (interacts with) B4GALT3	false
114421	interacts with	RFX1 (interacts with) HYAL2	false
114422	interacts with	RFX1 (interacts with) GALE	false
114423	interacts with	RFX2 (interacts with) MOGS	false
114424	interacts with	RFX2 (interacts with) B3GAT3	false
114425	interacts with	RFX2 (interacts with) GALNS	false
114426	interacts with	RFX5 (interacts with) NEU3	false
114427	interacts with	RFX5 (interacts with) COG8	false
114428	interacts with	RFX5 (interacts with) PIGO	false
114429	interacts with	RFX5 (interacts with) MPI	false
114430	interacts with	RFX7 (interacts with) NEU3	false
114431	interacts with	RFX7 (interacts with) ALG9	false
114432	interacts with	RNF2 (interacts with) FAM20B	false
114433	interacts with	RNF2 (interacts with) SLC35A5	false
114434	interacts with	RNF2 (interacts with) MAN1A2	false
114435	interacts with	RNF2 (interacts with) FPGT	false
114436	interacts with	RNF2 (interacts with) SLC35F5	false
114437	interacts with	RNF2 (interacts with) COG5	false
114438	interacts with	RNF2 (interacts with) SLC35A3	false
114439	interacts with	RNF2 (interacts with) ALG10B	false
114440	interacts with	RNF2 (interacts with) PIGM	false
114441	interacts with	RNF2 (interacts with) GNPNAT1	false
114442	interacts with	RNF2 (interacts with) B3GALNT1	false
114443	interacts with	RNF2 (interacts with) PIGW	false
114444	interacts with	RNF2 (interacts with) GALNT4	false
114445	interacts with	RORA (interacts with) ST6GAL1	false
114446	interacts with	RUNX1 (interacts with) FUT2	false
114447	interacts with	RUNX1 (interacts with) FAM20B	false
114448	interacts with	RUNX1 (interacts with) FUT10	false
114449	interacts with	RXRA (interacts with) B3GALT4	false
114450	interacts with	RXRA (interacts with) SULF2	false
114451	interacts with	RXRA (interacts with) B4GALT1	false
114452	interacts with	RXRA (interacts with) HK3	false
114453	interacts with	RXRA (interacts with) SGSH	false
114454	interacts with	RXRA (interacts with) LFNG	false
114455	interacts with	RXRA (interacts with) CHST15	false
114456	interacts with	RXRA (interacts with) PMM1	false
114457	interacts with	RXRA (interacts with) NPL	false
114458	interacts with	RXRA (interacts with) HK1	false
114459	interacts with	RXRA (interacts with) HEXB	false
114460	interacts with	RXRA (interacts with) EXT1	false
114461	interacts with	RXRA (interacts with) NAGK	false
114462	interacts with	RXRA (interacts with) HPSE	false
114463	interacts with	RXRA (interacts with) GCNT2	false
114464	interacts with	RXRA (interacts with) NAGA	false
114465	interacts with	RXRA (interacts with) GNS	false
114466	interacts with	RXRA (interacts with) NEU1	false
114467	interacts with	RXRA (interacts with) NAAA	false
114468	interacts with	RXRA (interacts with) GAA	false
114469	interacts with	RXRA (interacts with) EXTL3	false
114470	interacts with	RXRA (interacts with) MGAT1	false
114471	interacts with	RXRA (interacts with) CSGALNACT2	false
114472	interacts with	RXRA (interacts with) FUCA1	false
114473	interacts with	RXRA (interacts with) TPST2	false
114474	interacts with	RYBP (interacts with) SLC35D1	false
114475	interacts with	RYBP (interacts with) GALNT1	false
114476	interacts with	SATB1 (interacts with) STT3B	false
114477	interacts with	SCML2 (interacts with) STT3B	false
114478	interacts with	SCML2 (interacts with) PIGN	false
114479	interacts with	SCML2 (interacts with) SLC35A3	false
114480	interacts with	SETDB1 (interacts with) OGT	false
114481	interacts with	SETDB1 (interacts with) COG8	false
114482	interacts with	SETDB1 (interacts with) PMM2	false
114483	interacts with	SETDB1 (interacts with) PIGO	false
114484	interacts with	SETDB1 (interacts with) PIGG	false
114485	interacts with	SETDB1 (interacts with) NEU3	false
114486	interacts with	SETDB1 (interacts with) ALG13	false
114487	interacts with	SETDB1 (interacts with) FUT2	false
114488	interacts with	SETDB1 (interacts with) PIGL	false
114489	interacts with	SFPQ (interacts with) GNPNAT1	false
114490	interacts with	SFPQ (interacts with) SLC35A3	false
114491	interacts with	SFPQ (interacts with) UAP1	false
114492	interacts with	SIN3A (interacts with) PIGN	false
114493	interacts with	SIN3A (interacts with) SLC35A3	false
114494	interacts with	SIN3A (interacts with) GNE	false
114495	interacts with	SIN3A (interacts with) COG6	false
114496	interacts with	SIN3A (interacts with) PIGW	false
114497	interacts with	SIN3A (interacts with) SLC35F5	false
114498	interacts with	SIN3A (interacts with) ALG9	false
114499	interacts with	SMAD1 (interacts with) B4GALT6	false
114500	interacts with	SMAD1 (interacts with) ALG10B	false
114501	interacts with	SMAD1 (interacts with) MAN1A1	false
114502	interacts with	SMAD1 (interacts with) MGAT5B	false
114503	interacts with	SMAD1 (interacts with) ST6GAL1	false
114504	interacts with	SMAD1 (interacts with) FUT2	false
114505	interacts with	SMAD2 (interacts with) ALG10B	false
114506	interacts with	SMAD3 (interacts with) CHST7	false
114507	interacts with	SMAD3 (interacts with) GCNT2	false
114508	interacts with	SMAD3 (interacts with) PMM1	false
114509	interacts with	SMAD3 (interacts with) EXTL3	false
114510	interacts with	SMAD4 (interacts with) SLC35D1	false
114511	interacts with	SMAD4 (interacts with) COG6	false
114512	interacts with	SMAD4 (interacts with) STT3B	false
114513	interacts with	SMAD4 (interacts with) COG5	false
114514	interacts with	SMAD4 (interacts with) SLC35F5	false
114515	interacts with	SMAD4 (interacts with) GFPT1	false
114516	interacts with	SMAD4 (interacts with) GALNT7	false
114517	interacts with	SMAD4 (interacts with) PIGW	false
114518	interacts with	SMARCA4 (interacts with) POMT2	false
114519	interacts with	SMARCA4 (interacts with) PIGO	false
114520	interacts with	SMARCA4 (interacts with) ALG3	false
114521	interacts with	SMARCA4 (interacts with) B4GALT2	false
114522	interacts with	SMARCA4 (interacts with) B3GALT6	false
114523	interacts with	SMARCA4 (interacts with) GANAB	false
114524	interacts with	SMARCA4 (interacts with) FKRP	false
114525	interacts with	SMARCA4 (interacts with) POMGNT1	false
114526	interacts with	SMARCA4 (interacts with) PIGQ	false
114527	interacts with	SMARCA4 (interacts with) ALG12	false
114528	interacts with	SMARCA4 (interacts with) MAN1B1	false
114529	interacts with	SMARCA4 (interacts with) COG7	false
114530	interacts with	SMARCA4 (interacts with) SLC35B2	false
114531	interacts with	SMARCA4 (interacts with) MPI	false
114532	interacts with	SMARCC1 (interacts with) FKTN	false
114533	interacts with	SMARCC1 (interacts with) RTF1	false
114534	interacts with	SMARCC1 (interacts with) ALG10	false
114535	interacts with	SMARCC1 (interacts with) FAM20B	false
114536	interacts with	SMARCC1 (interacts with) HS2ST1	false
114537	interacts with	SMARCC1 (interacts with) SLC35A3	false
114538	interacts with	SMARCC1 (interacts with) ALG10B	false
114539	interacts with	SMARCC1 (interacts with) GNPNAT1	false
114540	interacts with	SMARCC1 (interacts with) COG6	false
114541	interacts with	SMARCC1 (interacts with) GNE	false
114542	interacts with	SMARCC1 (interacts with) EXTL2	false
114543	interacts with	SMARCC1 (interacts with) ALG9	false
114544	interacts with	SMARCC1 (interacts with) UXS1	false
114545	interacts with	SMARCC1 (interacts with) GALK2	false
114546	interacts with	SMARCC2 (interacts with) GMDS	false
114547	interacts with	SMARCC2 (interacts with) PIGO	false
114548	interacts with	SMARCC2 (interacts with) POMGNT1	false
114549	interacts with	SMARCC2 (interacts with) COG8	false
114550	interacts with	SMARCC2 (interacts with) CHST14	false
114551	interacts with	SMARCC2 (interacts with) FUT2	false
114552	interacts with	SMARCC2 (interacts with) MPI	false
114553	interacts with	SMARCC2 (interacts with) CHST12	false
114554	interacts with	SMARCC2 (interacts with) PIGV	false
114555	interacts with	SMARCC2 (interacts with) MAN1B1	false
114556	interacts with	SMC3 (interacts with) RTF1	false
114557	interacts with	SMC3 (interacts with) SLC35A3	false
114558	interacts with	SMC3 (interacts with) FKTN	false
114559	interacts with	SMC3 (interacts with) PIGN	false
114560	interacts with	SMC3 (interacts with) COG6	false
114561	interacts with	SMC3 (interacts with) PIGK	false
114562	interacts with	SMC3 (interacts with) ALG10B	false
114563	interacts with	SMC3 (interacts with) PIGW	false
114564	interacts with	SMC3 (interacts with) GFPT1	false
114565	interacts with	SMC3 (interacts with) GALK2	false
114566	interacts with	SMC3 (interacts with) SLC35F5	false
114567	interacts with	SMC3 (interacts with) GNPNAT1	false
114568	interacts with	SNAPC1 (interacts with) MGAT2	false
114569	interacts with	SNAPC1 (interacts with) PIGW	false
114570	interacts with	SNAPC1 (interacts with) GALK2	false
114571	interacts with	SND1 (interacts with) SLC35A2	false
114572	interacts with	SND1 (interacts with) GANAB	false
114573	interacts with	SND1 (interacts with) SLC35B2	false
114574	interacts with	SOX4 (interacts with) GAL3ST4	false
114575	interacts with	SOX4 (interacts with) RTF1	false
114576	interacts with	SOX4 (interacts with) PIGP	false
114577	interacts with	SP2 (interacts with) B3GAT3	false
114578	interacts with	SP2 (interacts with) FKRP	false
114579	interacts with	SP2 (interacts with) RFNG	false
114580	interacts with	SP2 (interacts with) ALG12	false
114581	interacts with	SP2 (interacts with) ST6GALNAC6	false
114582	interacts with	SP2 (interacts with) PIGQ	false
114583	interacts with	SP4 (interacts with) ALG9	false
114584	interacts with	SPIB (interacts with) UGCG	false
114585	interacts with	SRCAP (interacts with) PIGG	false
114586	interacts with	SRCAP (interacts with) MAN1B1	false
114587	interacts with	SREBF2 (interacts with) ALG12	false
114588	interacts with	SREBF2 (interacts with) SLC35E4	false
114589	interacts with	SRF (interacts with) FKRP	false
114590	interacts with	SRF (interacts with) SLC35C1	false
114591	interacts with	SRF (interacts with) KHK	false
114592	interacts with	SRF (interacts with) GALK1	false
114593	interacts with	SRF (interacts with) ST6GALNAC6	false
114594	interacts with	SRF (interacts with) ALG3	false
114595	interacts with	SRF (interacts with) B3GAT3	false
114596	interacts with	SRF (interacts with) GPAA1	false
114597	interacts with	SRF (interacts with) ALG12	false
114598	interacts with	SRF (interacts with) RFNG	false
114599	interacts with	SRF (interacts with) B4GALT3	false
114600	interacts with	SRF (interacts with) TSTA3	false
114601	interacts with	SRF (interacts with) DPM3	false
114602	interacts with	SRF (interacts with) GALE	false
114603	interacts with	SRF (interacts with) MOGS	false
114604	interacts with	SSRP1 (interacts with) STT3A	false
114605	interacts with	SSRP1 (interacts with) ALG8	false
114606	interacts with	SSRP1 (interacts with) DPM2	false
114607	interacts with	STAT2 (interacts with) GNS	false
114608	interacts with	STAT2 (interacts with) HK3	false
114609	interacts with	STAT2 (interacts with) ST3GAL5	false
114610	interacts with	STAT2 (interacts with) MGAT1	false
114611	interacts with	STAT2 (interacts with) HEXB	false
114612	interacts with	STAT2 (interacts with) B3GALT4	false
114613	interacts with	STAT5A (interacts with) MPI	false
114614	interacts with	STAT5A (interacts with) HYAL2	false
114615	interacts with	STAT5A (interacts with) FUT1	false
114616	interacts with	STAT5A (interacts with) POMGNT1	false
114617	interacts with	STAT5B (interacts with) COG1	false
114618	interacts with	STAT5B (interacts with) NEU3	false
114619	interacts with	STAT5B (interacts with) MAN1A1	false
114620	interacts with	STAT5B (interacts with) STT3B	false
114621	interacts with	STAT5B (interacts with) B4GALT6	false
114622	interacts with	STAT5B (interacts with) ST6GAL1	false
114623	interacts with	STAT5B (interacts with) GCNT4	false
114624	interacts with	STAT5B (interacts with) ST3GAL1	false
114625	interacts with	STAT5B (interacts with) FUT1	false
114626	interacts with	STAT5B (interacts with) COG8	false
114627	interacts with	STAT5B (interacts with) SLC35F5	false
114628	interacts with	STAT5B (interacts with) PIGL	false
114629	interacts with	STAT6 (interacts with) SGSH	false
114630	interacts with	STAT6 (interacts with) LFNG	false
114631	interacts with	STAT6 (interacts with) GAA	false
114632	interacts with	STAT6 (interacts with) MGAT1	false
114633	interacts with	STAT6 (interacts with) RENBP	false
114634	interacts with	STAT6 (interacts with) B3GALT4	false
114635	interacts with	STAT6 (interacts with) NAAA	false
114636	interacts with	STAT6 (interacts with) HK3	false
114637	interacts with	STAT6 (interacts with) NAGA	false
114638	interacts with	STAT6 (interacts with) NAGK	false
114639	interacts with	STAT6 (interacts with) GALK1	false
114640	interacts with	STAT6 (interacts with) SLC35A4	false
114641	interacts with	STAT6 (interacts with) B3GNT8	false
114642	interacts with	STAT6 (interacts with) GBA	false
114643	interacts with	STAT6 (interacts with) B4GALT1	false
114644	interacts with	STAT6 (interacts with) B3GAT3	false
114645	interacts with	SUMO2 (interacts with) PIGY	false
114646	interacts with	SUMO2 (interacts with) ALG5	false
114647	interacts with	SUMO2 (interacts with) DPM1	false
114648	interacts with	SUMO2 (interacts with) PIGP	false
114649	interacts with	SUMO2 (interacts with) PIGK	false
114650	interacts with	SUMO2 (interacts with) PIGX	false
114651	interacts with	SUMO2 (interacts with) GNPNAT1	false
114652	interacts with	SUMO2 (interacts with) RTF1	false
114653	interacts with	TAF1 (interacts with) NEU3	false
114654	interacts with	TAF1 (interacts with) MAN1A2	false
114655	interacts with	TAF1 (interacts with) COG5	false
114656	interacts with	TAF1 (interacts with) ALG10B	false
114657	interacts with	TAF1 (interacts with) SLC35A3	false
114658	interacts with	TAF1 (interacts with) SLC35D1	false
114659	interacts with	TAF1 (interacts with) ALG10	false
114660	interacts with	TAF1 (interacts with) COG3	false
114661	interacts with	TAF1 (interacts with) COG6	false
114662	interacts with	TAF1 (interacts with) SLC35F5	false
114663	interacts with	TAF1 (interacts with) ALG9	false
114664	interacts with	TAF1 (interacts with) PIGG	false
114665	interacts with	TAL1 (interacts with) FUT1	false
114666	interacts with	TAL1 (interacts with) ST6GAL1	false
114667	interacts with	TAL1 (interacts with) ST3GAL1	false
114668	interacts with	TAL1 (interacts with) MGAT3	false
114669	interacts with	TAL1 (interacts with) GCNT4	false
114670	interacts with	TAL1 (interacts with) ST6GALNAC1	false
114671	interacts with	TAL1 (interacts with) A4GALT	false
114672	interacts with	TAL1 (interacts with) ST6GALNAC4	false
114673	interacts with	TAL1 (interacts with) ST8SIA1	false
114674	interacts with	TAL1 (interacts with) SULF1	false
114675	interacts with	TAL1 (interacts with) B3GNT9	false
114676	interacts with	TAL1 (interacts with) CHST3	false
114677	interacts with	TAL1 (interacts with) B3GNT3	false
114678	interacts with	TBL1X (interacts with) GLB1	false
114679	interacts with	TBL1X (interacts with) B3GALT4	false
114680	interacts with	TBL1XR1 (interacts with) ALG10	false
114681	interacts with	TBL1XR1 (interacts with) ALG10B	false
114682	interacts with	TBL1XR1 (interacts with) HS2ST1	false
114683	interacts with	TBL1XR1 (interacts with) SLC35A3	false
114684	interacts with	TBL1XR1 (interacts with) SLC35F5	false
114685	interacts with	TBL1XR1 (interacts with) PIGW	false
114686	interacts with	TBL1XR1 (interacts with) ALG9	false
114687	interacts with	TBP (interacts with) ALG9	false
114688	interacts with	TBP (interacts with) EXTL2	false
114689	interacts with	TBP (interacts with) PIGV	false
114690	interacts with	TBP (interacts with) PIGO	false
114691	interacts with	TBP (interacts with) ST3GAL3	false
114692	interacts with	TBP (interacts with) COG1	false
114693	interacts with	TBP (interacts with) DPAGT1	false
114694	interacts with	TBP (interacts with) NEU3	false
114695	interacts with	TBX21 (interacts with) TPST2	false
114696	interacts with	TBX21 (interacts with) B4GALNT4	false
114697	interacts with	TBX21 (interacts with) ST3GAL1	false
114698	interacts with	TBX21 (interacts with) B3GNT9	false
114699	interacts with	TCF12 (interacts with) STT3B	false
114700	interacts with	TCF12 (interacts with) COG3	false
114701	interacts with	TCF12 (interacts with) GALK2	false
114702	interacts with	TCF12 (interacts with) FUT10	false
114703	interacts with	TCF12 (interacts with) SLC35F5	false
114704	interacts with	TCF12 (interacts with) ALG9	false
114705	interacts with	TCF12 (interacts with) PIGW	false
114706	interacts with	TCF7 (interacts with) LAMP3	false
114707	interacts with	TCF7 (interacts with) GCNT4	false
114708	interacts with	TCF7 (interacts with) ST8SIA1	false
114709	interacts with	TCF7 (interacts with) MGAT4A	false
114710	interacts with	TCF7 (interacts with) B3GAT1	false
114711	interacts with	TCF7 (interacts with) DSEL	false
114712	interacts with	TCF7L2 (interacts with) HPSE	false
114713	interacts with	TCF7L2 (interacts with) SLC35E4	false
114714	interacts with	TDRD3 (interacts with) COG6	false
114715	interacts with	TDRD3 (interacts with) COG5	false
114716	interacts with	TERF1 (interacts with) FAM20B	false
114717	interacts with	TERF1 (interacts with) FKTN	false
114718	interacts with	TERF1 (interacts with) SLC35F5	false
114719	interacts with	TERF1 (interacts with) PIGK	false
114720	interacts with	TERF1 (interacts with) SLC35A3	false
114721	interacts with	TERF1 (interacts with) PIGW	false
114722	interacts with	TERF1 (interacts with) GALK2	false
114723	interacts with	TERF1 (interacts with) ALG6	false
114724	interacts with	TET2 (interacts with) COG5	false
114725	interacts with	TET2 (interacts with) CSGALNACT2	false
114726	interacts with	TET2 (interacts with) ASAH1	false
114727	interacts with	TET2 (interacts with) GALNT4	false
114728	interacts with	TET2 (interacts with) SLC35A1	false
114729	interacts with	TET2 (interacts with) SLC35A5	false
114730	interacts with	TET2 (interacts with) CTBS	false
114731	interacts with	TFAM (interacts with) CMAS	false
114732	interacts with	TFE3 (interacts with) SGSH	false
114733	interacts with	TFE3 (interacts with) SLC35E4	false
114734	interacts with	TFE3 (interacts with) GAA	false
114735	interacts with	TFE3 (interacts with) NEU1	false
114736	interacts with	THAP1 (interacts with) MGAT2	false
114737	interacts with	THAP1 (interacts with) DPM1	false
114738	interacts with	THAP11 (interacts with) ALG3	false
114739	interacts with	THAP11 (interacts with) RFNG	false
114740	interacts with	THAP11 (interacts with) MOGS	false
114741	interacts with	THAP11 (interacts with) GALK1	false
114742	interacts with	THAP11 (interacts with) DPM2	false
114743	interacts with	THAP11 (interacts with) GPAA1	false
114744	interacts with	THAP11 (interacts with) SLC35C1	false
114745	interacts with	TOP2B (interacts with) B4GALT6	false
114746	interacts with	TOP2B (interacts with) GNE	false
114747	interacts with	TP53 (interacts with) PIGW	false
114748	interacts with	TP53 (interacts with) ALG8	false
114749	interacts with	TP53 (interacts with) MPI	false
114750	interacts with	TP53 (interacts with) PIGO	false
114751	interacts with	TP53 (interacts with) POMGNT1	false
114752	interacts with	TP53 (interacts with) ALG1	false
114753	interacts with	TRIM28 (interacts with) FKRP	false
114754	interacts with	TRIM28 (interacts with) GPAA1	false
114755	interacts with	TRIM28 (interacts with) B4GALT2	false
114756	interacts with	TRIM28 (interacts with) ALG3	false
114757	interacts with	TRIM28 (interacts with) B4GALT7	false
114758	interacts with	TRIM28 (interacts with) GANAB	false
114759	interacts with	TRIM28 (interacts with) MOGS	false
114760	interacts with	TRIM28 (interacts with) PIGQ	false
114761	interacts with	TRIM28 (interacts with) B3GAT3	false
114762	interacts with	TRIM28 (interacts with) MFNG	false
114763	interacts with	TRIM28 (interacts with) XYLT2	false
114764	interacts with	TRIM28 (interacts with) DPM2	false
114765	interacts with	TRIM28 (interacts with) SLC35B2	false
114766	interacts with	TRIM28 (interacts with) POMGNT1	false
114767	interacts with	TRIM28 (interacts with) ALG12	false
114768	interacts with	TRIM28 (interacts with) MPI	false
114769	interacts with	TRIM28 (interacts with) B4GALT3	false
114770	interacts with	TRIM28 (interacts with) SLC35A2	false
114771	interacts with	TRIM28 (interacts with) TSTA3	false
114772	interacts with	TRIM28 (interacts with) PIGO	false
114773	interacts with	TRIM28 (interacts with) NAGLU	false
114774	interacts with	TRIM28 (interacts with) GALE	false
114775	interacts with	TRIM28 (interacts with) ST6GALNAC6	false
114776	interacts with	TRIM28 (interacts with) DPAGT1	false
114777	interacts with	TRRAP (interacts with) PIGO	false
114778	interacts with	TTF1 (interacts with) PIGC	false
114779	interacts with	TTF2 (interacts with) PIGW	false
114780	interacts with	TTF2 (interacts with) UGGT1	false
114781	interacts with	TTF2 (interacts with) ALG6	false
114782	interacts with	TTF2 (interacts with) PIGN	false
114783	interacts with	TTF2 (interacts with) GNPNAT1	false
114784	interacts with	TTF2 (interacts with) SLC35B4	false
114785	interacts with	TTF2 (interacts with) ALG8	false
114786	interacts with	TTF2 (interacts with) ALG9	false
114787	interacts with	TTF2 (interacts with) EXTL2	false
114788	interacts with	TTF2 (interacts with) FAM20B	false
114789	interacts with	UBE2I (interacts with) DAD1	false
114790	interacts with	UBTF (interacts with) PIGQ	false
114791	interacts with	UBTF (interacts with) COG8	false
114792	interacts with	UBTF (interacts with) ALG9	false
114793	interacts with	UBTF (interacts with) COG1	false
114794	interacts with	UBTF (interacts with) POMGNT1	false
114795	interacts with	UBTF (interacts with) CHST10	false
114796	interacts with	UBTF (interacts with) MPI	false
114797	interacts with	UBTF (interacts with) FUT2	false
114798	interacts with	UBTF (interacts with) MGAT5B	false
114799	interacts with	UBTF (interacts with) NEU3	false
114800	interacts with	UBTF (interacts with) PIGO	false
114801	interacts with	UBTF (interacts with) ST6GALNAC4	false
114802	interacts with	USF1 (interacts with) NAGK	false
114803	interacts with	USF1 (interacts with) GMPPA	false
114804	interacts with	USF1 (interacts with) B3GALT4	false
114805	interacts with	USF1 (interacts with) RENBP	false
114806	interacts with	USF1 (interacts with) SGSH	false
114807	interacts with	USF1 (interacts with) MGAT1	false
114808	interacts with	USF1 (interacts with) GAA	false
114809	interacts with	USF1 (interacts with) PMM1	false
114810	interacts with	USF1 (interacts with) ARSA	false
114811	interacts with	USF1 (interacts with) LFNG	false
114812	interacts with	USF1 (interacts with) SULF2	false
114813	interacts with	USF1 (interacts with) NAGA	false
114814	interacts with	USP49 (interacts with) PIGG	false
114815	interacts with	USP49 (interacts with) PIGL	false
114816	interacts with	VDR (interacts with) SULF2	false
114817	interacts with	VDR (interacts with) B4GALT1	false
114818	interacts with	VDR (interacts with) HK1	false
114819	interacts with	VDR (interacts with) LIPA	false
114820	interacts with	VDR (interacts with) GLB1	false
114821	interacts with	VDR (interacts with) GNPDA1	false
114822	interacts with	VDR (interacts with) NAGA	false
114823	interacts with	VDR (interacts with) GNS	false
114824	interacts with	VDR (interacts with) HEXB	false
114825	interacts with	VDR (interacts with) LFNG	false
114826	interacts with	VDR (interacts with) PMM1	false
114827	interacts with	VDR (interacts with) NAAA	false
114828	interacts with	VDR (interacts with) GM2A	false
114829	interacts with	VDR (interacts with) SGSH	false
114830	interacts with	VDR (interacts with) GBA	false
114831	interacts with	VDR (interacts with) FUCA1	false
114832	interacts with	VDR (interacts with) MGAT1	false
114833	interacts with	VDR (interacts with) B3GALT4	false
114834	interacts with	VDR (interacts with) SLC35E4	false
114835	interacts with	VDR (interacts with) NEU1	false
114836	interacts with	VEZF1 (interacts with) ALG10B	false
114837	interacts with	VEZF1 (interacts with) ALG10	false
114838	interacts with	VEZF1 (interacts with) SLC35F5	false
114839	interacts with	VEZF1 (interacts with) COG6	false
114840	interacts with	VEZF1 (interacts with) PIGN	false
114841	interacts with	VEZF1 (interacts with) SLC35A3	false
114842	interacts with	WDR5 (interacts with) DPM2	false
114843	interacts with	WDR5 (interacts with) B4GALT2	false
114844	interacts with	WDR5 (interacts with) ALG3	false
114845	interacts with	WDR5 (interacts with) B3GALT6	false
114846	interacts with	WDR5 (interacts with) SLC35B2	false
114847	interacts with	WDR5 (interacts with) POMT2	false
114848	interacts with	WDR5 (interacts with) DPAGT1	false
114849	interacts with	WDR5 (interacts with) GPAA1	false
114850	interacts with	WDR5 (interacts with) ALG1	false
114851	interacts with	WDR5 (interacts with) TSTA3	false
114852	interacts with	WDR5 (interacts with) KHK	false
114853	interacts with	WDR5 (interacts with) SLC35A2	false
114854	interacts with	WRNIP1 (interacts with) POMGNT1	false
114855	interacts with	XBP1 (interacts with) UAP1	false
114856	interacts with	XBP1 (interacts with) ALG5	false
114857	interacts with	XBP1 (interacts with) STT3A	false
114858	interacts with	XBP1 (interacts with) UGP2	false
114859	interacts with	XBP1 (interacts with) GANAB	false
114860	interacts with	XRN2 (interacts with) STT3B	false
114861	interacts with	XRN2 (interacts with) PIGN	false
114862	interacts with	XRN2 (interacts with) HS2ST1	false
114863	interacts with	XRN2 (interacts with) SLC35A3	false
114864	interacts with	XRN2 (interacts with) GLCE	false
114865	interacts with	XRN2 (interacts with) SLC35A5	false
114866	interacts with	XRN2 (interacts with) GNPNAT1	false
114867	interacts with	XRN2 (interacts with) PIGK	false
114868	interacts with	YY1 (interacts with) GNPNAT1	false
114869	interacts with	YY1 (interacts with) STT3B	false
114870	interacts with	YY1 (interacts with) SLC35A3	false
114871	interacts with	YY1 (interacts with) PIGW	false
114872	interacts with	YY1 (interacts with) MAN1A2	false
114873	interacts with	YY1 (interacts with) PIGN	false
114874	interacts with	YY1 (interacts with) SLC35D1	false
114875	interacts with	ZBTB10 (interacts with) ALG10	false
114876	interacts with	ZBTB10 (interacts with) SLC35F5	false
114877	interacts with	ZBTB10 (interacts with) ALG9	false
114878	interacts with	ZBTB10 (interacts with) GALNT7	false
114879	interacts with	ZBTB17 (interacts with) RFNG	false
114880	interacts with	ZBTB17 (interacts with) PIGQ	false
114881	interacts with	ZBTB17 (interacts with) B3GAT3	false
114882	interacts with	ZBTB17 (interacts with) DPM3	false
114883	interacts with	ZBTB17 (interacts with) IDUA	false
114884	interacts with	ZBTB17 (interacts with) MOGS	false
114885	interacts with	ZBTB17 (interacts with) POMT1	false
114886	interacts with	ZBTB17 (interacts with) B4GALT7	false
114887	interacts with	ZBTB17 (interacts with) SLC35C2	false
114888	interacts with	ZBTB17 (interacts with) FKRP	false
114889	interacts with	ZBTB17 (interacts with) ALG12	false
114890	interacts with	ZBTB17 (interacts with) POMGNT1	false
114891	interacts with	ZBTB17 (interacts with) GALE	false
114892	interacts with	ZBTB17 (interacts with) MAN1B1	false
114893	interacts with	ZBTB17 (interacts with) XYLT2	false
114894	interacts with	ZBTB17 (interacts with) GPAA1	false
114895	interacts with	ZBTB17 (interacts with) GALT	false
114896	interacts with	ZBTB17 (interacts with) ALG3	false
114897	interacts with	ZBTB17 (interacts with) CHPF2	false
114898	interacts with	ZBTB17 (interacts with) ST6GALNAC6	false
114899	interacts with	ZBTB17 (interacts with) GANAB	false
114900	interacts with	ZBTB17 (interacts with) B4GALT3	false
114901	interacts with	ZBTB17 (interacts with) PIGO	false
114902	interacts with	ZBTB17 (interacts with) NAGLU	false
114903	interacts with	ZBTB17 (interacts with) SLC35B2	false
114904	interacts with	ZBTB33 (interacts with) FKTN	false
114905	interacts with	ZBTB33 (interacts with) ALG10	false
114906	interacts with	ZBTB33 (interacts with) ALG10B	false
114907	interacts with	ZBTB33 (interacts with) SLC35A3	false
114908	interacts with	ZBTB33 (interacts with) SLC35A5	false
114909	interacts with	ZBTB33 (interacts with) PIGM	false
114910	interacts with	ZBTB33 (interacts with) COG5	false
114911	interacts with	ZBTB33 (interacts with) PIGN	false
114912	interacts with	ZBTB33 (interacts with) B3GALNT2	false
114913	interacts with	ZBTB33 (interacts with) GLCE	false
114914	interacts with	ZBTB33 (interacts with) MGAT2	false
114915	interacts with	ZBTB33 (interacts with) SLC35B4	false
114916	interacts with	ZBTB33 (interacts with) PIGW	false
114917	interacts with	ZBTB33 (interacts with) COG6	false
114918	interacts with	ZBTB33 (interacts with) GNE	false
114919	interacts with	ZBTB33 (interacts with) PIGB	false
