# Supplementary material for: A systems-based framework to computationally describe putative transcription factors and signaling pathways regulating glycan biosynthesis
Source: publisher site journal article supplement (doi:10.3762/bjoc.17.119), 2021-07-22
Supplement: Additional file 2 [file 1860-5397-17-119-S2.cys › CytoscapeSession-2021_03_21-12_01/tables/113200-LAML/LOCAL_ATTRS-org.cytoscape.model.CyNode-LAML+default+node.cytable]

CyCSV-Version	1
SUID	name	nodeType	selected
java.lang.Long	java.lang.String	java.lang.String	java.lang.Boolean
		mutable
LAML default node
110787	AEBP2	TF	false
105731	FAM20B	Glycogene	false
105692	COG5	Glycogene	false
105686	AFF4	TF	false
105687	MAN1A2	Glycogene	false
105688	STT3B	Glycogene	false
105695	SLC35A3	Glycogene	false
105950	SLC35D1	Glycogene	false
105711	ALG10	Glycogene	false
106882	GFPT1	Glycogene	false
105727	ALG10B	Glycogene	false
105696	SLC35F5	Glycogene	false
105906	HS2ST1	Glycogene	false
105771	OGT	Glycogene	false
106836	AHR	TF	false
105703	GALNT4	Glycogene	false
106846	LFNG	Glycogene	false
113210	ALKBH3	TF	false
105998	GANAB	Glycogene	false
108578	PIGL	Glycogene	false
105699	ARID2	TF	false
105824	COG6	Glycogene	false
107970	ARID3A	TF	false
108567	NAGA	Glycogene	false
105923	NDST1	Glycogene	false
105724	MGAT1	Glycogene	false
107274	B4GALT1	Glycogene	false
106030	B3GALT4	Glycogene	false
105883	GM2A	Glycogene	false
105905	GNS	Glycogene	false
107309	GBA	Glycogene	false
108588	SLC35C1	Glycogene	false
105735	PMM1	Glycogene	false
107299	EXTL3	Glycogene	false
110804	SGSH	Glycogene	false
113211	ARNT	TF	false
108005	SLC17A5	Glycogene	false
112214	ARNTL	TF	false
107293	HK1	Glycogene	false
107273	ASH2L	TF	false
108554	ALG9	Glycogene	false
105713	FKTN	Glycogene	false
107286	ALG8	Glycogene	false
108558	PIGC	Glycogene	false
106838	B3GNT2	Glycogene	false
105701	ATF1	TF	false
105702	SLC35A5	Glycogene	false
105855	GNPNAT1	Glycogene	false
105799	DPM1	Glycogene	false
109670	C1GALT1	Glycogene	false
105704	ATF2	TF	false
105690	FUT11	Glycogene	false
105689	NEU3	Glycogene	false
107278	FUT10	Glycogene	false
105823	COG3	Glycogene	false
107300	ALG11	Glycogene	false
106859	GALNT7	Glycogene	false
107976	FUT8	Glycogene	false
109689	PIGG	Glycogene	false
110806	GALK2	Glycogene	false
108550	ATF4	TF	false
105744	RFNG	Glycogene	false
105782	B4GALT7	Glycogene	false
105789	B4GALT3	Glycogene	false
105749	IDUA	Glycogene	false
105722	DPM3	Glycogene	false
105761	POMT1	Glycogene	false
108007	CHPF2	Glycogene	false
108023	POMT2	Glycogene	false
105754	B3GAT3	Glycogene	false
105762	MOGS	Glycogene	false
105718	CHST11	Glycogene	false
105747	ST3GAL3	Glycogene	false
105760	MAN1B1	Glycogene	false
107335	SLC35A2	Glycogene	false
106851	GALT	Glycogene	false
108572	SLC35B2	Glycogene	false
105710	ATF7IP	TF	false
105712	ATRX	TF	false
105714	BACH1	TF	false
105715	CSGALNACT2	Glycogene	false
107290	ASAH1	Glycogene	false
108553	BACH2	TF	false
106858	GCNT4	Glycogene	false
105721	BATF	TF	false
107984	CTSA	Glycogene	false
106840	TPST2	Glycogene	false
105758	DPM2	Glycogene	false
111105	ARSA	Glycogene	false
108559	GALE	Glycogene	false
105766	MFNG	Glycogene	false
107971	NEU1	Glycogene	false
105881	GPAA1	Glycogene	false
108586	SLC35A4	Glycogene	false
107983	B3GNT8	Glycogene	false
105725	BCAT1	TF	false
106841	BCL11A	TF	false
107331	B4GALT6	Glycogene	false
105954	PIGM	Glycogene	false
105837	SULT1C4	Glycogene	false
105716	MAN1A1	Glycogene	false
107275	BCL6	TF	false
106861	CHST15	Glycogene	false
108585	HEXB	Glycogene	false
107296	GCNT2	Glycogene	false
105860	NPL	Glycogene	false
107310	NAAA	Glycogene	false
106856	FUCA1	Glycogene	false
105726	BMI1	TF	false
105812	GALNT12	Glycogene	false
105728	BRCA1	TF	false
105729	PIGW	Glycogene	false
105705	UGGT1	Glycogene	false
105730	PIGN	Glycogene	false
105700	RTF1	Glycogene	false
105845	SLC35B4	Glycogene	false
107297	GNE	Glycogene	false
105908	B3GALNT2	Glycogene	false
105733	BRD1	TF	false
105734	ALG12	Glycogene	false
105746	ST6GALNAC6	Glycogene	false
105896	FKRP	Glycogene	false
106891	COG8	Glycogene	false
106005	COG1	Glycogene	false
105874	PIGO	Glycogene	false
105783	POMGNT1	Glycogene	false
105759	PIGQ	Glycogene	false
105778	GAL3ST4	Glycogene	false
108605	GALNT9	Glycogene	false
105802	FUT1	Glycogene	false
109684	XYLT2	Glycogene	false
107276	BRD2	TF	false
107327	POFUT2	Glycogene	false
107986	SLC35C2	Glycogene	false
107277	BRD3	TF	false
106843	BRD4	TF	false
105806	ST3GAL2	Glycogene	false
108032	B3GNT9	Glycogene	false
107977	BRD7	TF	false
106835	PIGK	Glycogene	false
110789	BTAF1	TF	false
105805	CSGALNACT1	Glycogene	false
111093	CAMTA2	TF	false
109673	SMPD1	Glycogene	false
105738	CASP8AP2	TF	false
106845	CBFA2T3	TF	false
105739	CBFB	TF	false
105741	CBX3	TF	false
106012	ALG5	Glycogene	false
108557	PIGF	Glycogene	false
105742	CMAS	Glycogene	false
105844	EXTL2	Glycogene	false
113212	PIGP	Glycogene	false
107332	PIGY	Glycogene	false
105973	COG2	Glycogene	false
105743	CBX4	TF	false
105777	MAN2B1	Glycogene	false
105755	CCDC101	TF	false
105756	CDK8	TF	false
105757	CDK9	TF	false
105763	CHST12	Glycogene	false
105685	FUT7	Glycogene	false
105764	CEBPA	TF	false
105810	FUT4	Glycogene	false
107998	ST3GAL4	Glycogene	false
106864	GPI	Glycogene	false
109680	NAGLU	Glycogene	false
108018	CHST14	Glycogene	false
105767	CEBPB	TF	false
105859	HK3	Glycogene	false
105765	NAGK	Glycogene	false
108563	CEBPD	TF	false
110791	CEBPG	TF	false
108564	CEBPZ	TF	false
105769	CHD1	TF	false
105864	ALG13	Glycogene	false
105770	CHD2	TF	false
105773	CHD4	TF	false
105774	CHD8	TF	false
105775	CIITA	TF	false
105780	CPSF3L	TF	false
105880	TSTA3	Glycogene	false
105797	ALG3	Glycogene	false
107340	MPI	Glycogene	false
105788	CREB3L4	TF	false
105790	CREBBP	TF	false
106857	ST3GAL5	Glycogene	false
108568	CSNK2A1	TF	false
105793	CTBP1	TF	false
108569	DAXX	TF	false
105878	DPAGT1	Glycogene	false
106850	DCP1A	TF	false
105795	DEK	TF	false
108570	DOT1L	TF	false
105796	E2F1	TF	false
105753	GALK1	Glycogene	false
105917	B4GALT2	Glycogene	false
105781	B3GALT6	Glycogene	false
108555	DDOST	Glycogene	false
108038	GMPPB	Glycogene	false
107284	E2F3	TF	false
111090	PIGV	Glycogene	false
105732	SLC35E3	Glycogene	false
107987	E2F4	TF	false
106892	COG4	Glycogene	false
105787	GMPPA	Glycogene	false
106839	ST6GALNAC4	Glycogene	false
105801	E2F6	TF	false
105820	UAP1	Glycogene	false
107285	EED	TF	false
105816	EGR2	TF	false
106000	HPSE	Glycogene	false
105838	CHST2	Glycogene	false
108580	EXT1	Glycogene	false
105821	EHMT2	TF	false
105791	COG7	Glycogene	false
105822	ELF1	TF	false
107350	LAMP2	Glycogene	false
105825	ELF2	TF	false
113213	EOMES	TF	false
105776	LAMP3	Glycogene	false
106855	ST6GAL1	Glycogene	false
113214	PPBP	Glycogene	false
105829	EP400	TF	false
107287	FUT2	Glycogene	false
113215	GALNT14	Glycogene	false
107292	ERCC3	TF	false
105830	ERCC6	TF	false
105831	ERF	TF	false
105832	ERG	TF	false
105839	ETS1	TF	false
106860	MGAT4A	Glycogene	false
105840	ST8SIA1	Glycogene	false
108579	ST3GAL1	Glycogene	false
113216	B3GAT1	Glycogene	false
105836	UST	Glycogene	false
105846	EZH1	TF	false
108582	EZH2	TF	false
105849	FOS	TF	false
107294	FOSL1	TF	false
113217	NEU4	Glycogene	false
107295	FOSL2	TF	false
108560	GAA	Glycogene	false
105856	FOXO1	TF	false
106853	MAN1C1	Glycogene	false
105985	UGCG	Glycogene	false
107305	GNPDA1	Glycogene	false
113218	FOXP1	TF	false
105808	B3GALT2	Glycogene	false
105861	GABPA	TF	false
106863	GAPDH	TF	false
111100	GATA2	TF	false
111115	B3GALNT1	Glycogene	false
105748	MAN2A2	Glycogene	false
107288	FUT6	Glycogene	false
113219	GMDS	Glycogene	false
109677	GATA3	TF	false
112223	B3GNT3	Glycogene	false
105784	B4GALNT4	Glycogene	false
105863	GATAD1	TF	false
105866	GLYR1	TF	false
105867	ALG1	Glycogene	false
108589	GMEB2	TF	false
106865	GPS2	TF	false
105868	GTF2B	TF	false
105871	GTF2I	TF	false
110795	GTF3C1	TF	false
107302	GTF3C2	TF	false
105872	H2AFX	TF	false
105873	HCFC1	TF	false
107303	HDAC1	TF	false
108592	HDAC2	TF	false
108584	UGP2	Glycogene	false
107304	HDAC3	TF	false
108593	HDAC6	TF	false
113220	HYAL3	Glycogene	false
105875	HECTD1	TF	false
106867	HIF1A	TF	false
105877	HINFP	TF	false
108595	HIRA	TF	false
105750	MGAT3	Glycogene	false
112222	HOXA2	TF	false
113221	CHST4	Glycogene	false
113222	HOXA9	TF	false
105698	ST8SIA6	Glycogene	false
105882	IKZF1	TF	false
113223	ING2	TF	false
113224	ING5	TF	false
105885	INO80	TF	false
105886	INTS3	TF	false
106871	IRF2	TF	false
105834	ST8SIA4	Glycogene	false
105884	LIPA	Glycogene	false
106872	IRF3	TF	false
105888	IRF4	TF	false
105979	SULF2	Glycogene	false
105889	IRF5	TF	false
109675	GLB1	Glycogene	false
105890	IRF8	TF	false
107311	JARID2	TF	false
106014	GALNT1	Glycogene	false
105891	JDP2	TF	false
105892	JMJD1C	TF	false
105898	JUNB	TF	false
105899	JUND	TF	false
113225	FUT5	Glycogene	false
107312	KAT2B	TF	false
105901	KDM1A	TF	false
106873	KDM1B	TF	false
107313	KDM2B	TF	false
105841	HS3ST3B1	Glycogene	false
105903	KDM3A	TF	false
107307	EXT2	Glycogene	false
106874	KDM4A	TF	false
107997	KDM4C	TF	false
105697	GALNT10	Glycogene	false
105904	KDM5A	TF	false
105907	KDM5B	TF	false
109669	UXS1	Glycogene	false
107314	KDM5C	TF	false
107315	KDM6B	TF	false
105918	MGAT4B	Glycogene	false
113226	KLF1	TF	false
107317	KLF4	TF	false
112224	L3MBTL2	TF	false
107320	LDB1	TF	false
105920	ST6GALNAC1	Glycogene	false
106875	LEF1	TF	false
105857	DSEL	Glycogene	false
113227	LEO1	TF	false
107321	LIN9	TF	false
105911	LYL1	TF	false
105737	HYAL2	Glycogene	false
105914	MAFB	TF	false
110799	MAFG	TF	false
108006	MAFK	TF	false
105915	MAX	TF	false
105916	MAZ	TF	false
107322	MBD2	TF	false
105921	MECP2	TF	false
107324	MED12	TF	false
105925	MEF2A	TF	false
105779	DSE	Glycogene	false
105910	HS3ST1	Glycogene	false
105926	MEF2C	TF	false
107325	MEF2D	TF	false
105928	MEIS1	TF	false
108601	MLLT1	TF	false
107306	GALNT2	Glycogene	false
110801	MNT	TF	false
105931	MRE11A	TF	false
113228	MYB	TF	false
105935	MYBL2	TF	false
105854	RPN2	Glycogene	false
108009	MYC	TF	false
107979	SLC35F2	Glycogene	false
105942	MZF1	TF	false
108602	NCAPG	TF	false
107326	NCOR2	TF	false
105912	RENBP	Glycogene	false
105835	CHST7	Glycogene	false
105944	NFATC1	TF	false
111112	SLC35E4	Glycogene	false
113229	NFE2	TF	false
105945	NFIC	TF	false
107329	NFYA	TF	false
107330	NFYB	TF	false
105946	NFYC	TF	false
105947	NIPBL	TF	false
108016	NOTCH1	TF	false
107996	HS6ST1	Glycogene	false
105893	MGAT5	Glycogene	false
105922	IDS	Glycogene	false
105948	NPAT	TF	false
110807	NR1H3	TF	false
105949	NR2C2	TF	false
113230	PAX5	TF	false
113231	PBX3	TF	false
105966	UGGT2	Glycogene	false
113232	PCGF6	TF	false
105957	PHF6	TF	false
107334	PHF8	TF	false
105958	PIAS1	TF	false
105851	GLCE	Glycogene	false
107328	PAPSS2	Glycogene	false
110808	PIAS4	TF	false
107336	PML	TF	false
105959	POLR2B	TF	false
105694	MAN2A1	Glycogene	false
105960	POLR3A	TF	false
108609	POLR3D	TF	false
105962	PRDM1	TF	false
108021	PRDM4	TF	false
110810	PSIP1	TF	false
106884	RARA	TF	false
105965	RB1	TF	false
105967	RBBP5	TF	false
106868	MGAT2	Glycogene	false
108610	RBCK1	TF	false
105968	RBL2	TF	false
105976	FPGT	Glycogene	false
113233	RBPJ	TF	false
105869	CTBS	Glycogene	false
105969	RCOR1	TF	false
108024	RELA	TF	false
105971	RFX1	TF	false
108611	RFX2	TF	false
105740	GALNS	Glycogene	false
105972	RFX5	TF	false
105974	RFX7	TF	false
105975	RNF2	TF	false
105977	RORA	TF	false
105978	RUNX1	TF	false
105983	RXRA	TF	false
107338	RYBP	TF	false
108614	SATB1	TF	false
108025	SCML2	TF	false
107339	SETDB1	TF	false
108556	PMM2	Glycogene	false
108616	SFPQ	TF	false
105984	SIN3A	TF	false
107341	SMAD1	TF	false
108014	MGAT5B	Glycogene	false
106886	SMAD2	TF	false
107342	SMAD3	TF	false
105987	SMAD4	TF	false
107343	SMARCA4	TF	false
107344	SMARCC1	TF	false
105988	SMARCC2	TF	false
105990	SMC3	TF	false
108618	SNAPC1	TF	false
110812	SND1	TF	false
108620	SOX4	TF	false
107346	SP2	TF	false
110813	SP4	TF	false
106888	SPIB	TF	false
105994	SRCAP	TF	false
105995	SREBF2	TF	false
105996	SRF	TF	false
105800	KHK	Glycogene	false
105997	SSRP1	TF	false
106893	STT3A	Glycogene	false
106001	STAT2	TF	false
106003	STAT5A	TF	false
108029	STAT5B	TF	false
107348	STAT6	TF	false
106004	SUMO2	TF	false
107980	PIGX	Glycogene	false
106006	TAF1	TF	false
108624	TAL1	TF	false
105768	A4GALT	Glycogene	false
106883	SULF1	Glycogene	false
105807	CHST3	Glycogene	false
111113	TBL1X	TF	false
111114	TBL1XR1	TF	false
108030	TBP	TF	false
106889	TBX21	TF	false
106007	TCF12	TF	false
106008	TCF7	TF	false
106010	TCF7L2	TF	false
106011	TDRD3	TF	false
106015	TERF1	TF	false
106879	ALG6	Glycogene	false
106016	TET2	TF	false
108001	SLC35A1	Glycogene	false
113234	TFAM	TF	false
108625	TFE3	TF	false
108626	THAP1	TF	false
106890	THAP11	TF	false
110815	TOP2B	TF	false
108627	TP53	TF	false
106018	TRIM28	TF	false
108628	TRRAP	TF	false
111116	TTF1	TF	false
106019	TTF2	TF	false
108629	UBE2I	TF	false
108008	DAD1	Glycogene	false
106020	UBTF	TF	false
108013	CHST10	Glycogene	false
106021	USF1	TF	false
113235	USP49	TF	false
107356	VDR	TF	false
106023	VEZF1	TF	false
106024	WDR5	TF	false
109692	WRNIP1	TF	false
108037	XBP1	TF	false
106025	XRN2	TF	false
106028	YY1	TF	false
106894	ZBTB10	TF	false
106029	ZBTB17	TF	false
106031	ZBTB33	TF	false
108020	PIGB	Glycogene	false
