# Supplementary material for: A systems-based framework to computationally describe putative transcription factors and signaling pathways regulating glycan biosynthesis
Source: publisher site journal article supplement (doi:10.3762/bjoc.17.119), 2021-07-22
Supplement: Additional file 2 [file 1860-5397-17-119-S2.cys › CytoscapeSession-2021_03_21-12_01/tables/114920-LGG/LOCAL_ATTRS-org.cytoscape.model.CyNode-LGG+default+node.cytable]

CyCSV-Version	1
SUID	name	nodeType	selected
java.lang.Long	java.lang.String	java.lang.String	java.lang.Boolean
		mutable
LGG default node
105686	AFF4	TF	false
105687	MAN1A2	Glycogene	false
105688	STT3B	Glycogene	false
105689	NEU3	Glycogene	false
105690	FUT11	Glycogene	false
105691	ACER2	Glycogene	false
105692	COG5	Glycogene	false
105985	UGCG	Glycogene	false
105697	GALNT10	Glycogene	false
105705	UGGT1	Glycogene	false
105695	SLC35A3	Glycogene	false
105711	ALG10	Glycogene	false
106882	GFPT1	Glycogene	false
105727	ALG10B	Glycogene	false
105824	COG6	Glycogene	false
105998	GANAB	Glycogene	false
105717	CHSY1	Glycogene	false
107297	GNE	Glycogene	false
105772	NDST2	Glycogene	false
108551	UGDH	Glycogene	false
106868	MGAT2	Glycogene	false
106891	COG8	Glycogene	false
105699	ARID2	TF	false
108549	ASCL1	TF	false
105789	B4GALT3	Glycogene	false
105792	POFUT1	Glycogene	false
105762	MOGS	Glycogene	false
105954	PIGM	Glycogene	false
107273	ASH2L	TF	false
105700	RTF1	Glycogene	false
107990	B4GALNT1	Glycogene	false
105820	UAP1	Glycogene	false
105731	FAM20B	Glycogene	false
105704	ATF2	TF	false
107278	FUT10	Glycogene	false
108550	ATF4	TF	false
105744	RFNG	Glycogene	false
105710	ATF7IP	TF	false
105712	ATRX	TF	false
105702	SLC35A5	Glycogene	false
108553	BACH2	TF	false
105718	CHST11	Glycogene	false
105857	DSEL	Glycogene	false
105941	HAS3	Glycogene	false
105730	PIGN	Glycogene	false
108001	SLC35A1	Glycogene	false
105723	BATF3	TF	false
105834	ST8SIA4	Glycogene	false
105707	B3GNT5	Glycogene	false
106860	MGAT4A	Glycogene	false
105896	FKRP	Glycogene	false
105725	BCAT1	TF	false
108552	GCNT1	Glycogene	false
105922	IDS	Glycogene	false
106841	BCL11A	TF	false
114930	HS6ST3	Glycogene	false
105938	HS3ST4	Glycogene	false
105742	CMAS	Glycogene	false
108014	MGAT5B	Glycogene	false
114931	HS3ST5	Glycogene	false
109682	ST8SIA5	Glycogene	false
105708	HAS1	Glycogene	false
114932	NDST3	Glycogene	false
107293	HK1	Glycogene	false
114933	SLC35F4	Glycogene	false
109674	HS3ST2	Glycogene	false
105802	FUT1	Glycogene	false
105818	B3GALT1	Glycogene	false
108015	B4GALNT3	Glycogene	false
108010	CHST1	Glycogene	false
106858	GCNT4	Glycogene	false
105833	CHSY3	Glycogene	false
105747	ST3GAL3	Glycogene	false
105902	GNB1	Glycogene	false
105851	GLCE	Glycogene	false
107275	BCL6	TF	false
105779	DSE	Glycogene	false
107328	PAPSS2	Glycogene	false
107327	POFUT2	Glycogene	false
105950	SLC35D1	Glycogene	false
105726	BMI1	TF	false
106014	GALNT1	Glycogene	false
105733	BRD1	TF	false
105823	COG3	Glycogene	false
105771	OGT	Glycogene	false
105784	B4GALNT4	Glycogene	false
105791	COG7	Glycogene	false
105749	IDUA	Glycogene	false
105966	UGGT2	Glycogene	false
105715	CSGALNACT2	Glycogene	false
108554	ALG9	Glycogene	false
106892	COG4	Glycogene	false
107276	BRD2	TF	false
105874	PIGO	Glycogene	false
105713	FKTN	Glycogene	false
105807	CHST3	Glycogene	false
107300	ALG11	Glycogene	false
108578	PIGL	Glycogene	false
107277	BRD3	TF	false
105979	SULF2	Glycogene	false
107307	EXT2	Glycogene	false
106843	BRD4	TF	false
105806	ST3GAL2	Glycogene	false
110789	BTAF1	TF	false
105736	C17orf49	TF	false
105754	B3GAT3	Glycogene	false
105880	TSTA3	Glycogene	false
105798	SLC35B1	Glycogene	false
105797	ALG3	Glycogene	false
107978	C17orf96	TF	false
108590	GAL3ST3	Glycogene	false
105738	CASP8AP2	TF	false
105739	CBFB	TF	false
105741	CBX3	TF	false
105799	DPM1	Glycogene	false
106012	ALG5	Glycogene	false
107286	ALG8	Glycogene	false
108557	PIGF	Glycogene	false
108558	PIGC	Glycogene	false
105729	PIGW	Glycogene	false
105854	RPN2	Glycogene	false
105878	DPAGT1	Glycogene	false
105743	CBX4	TF	false
105745	CBX7	TF	false
105746	ST6GALNAC6	Glycogene	false
107989	ST6GALNAC5	Glycogene	false
108566	B3GNT4	Glycogene	false
108584	UGP2	Glycogene	false
105752	CBX8	TF	false
108018	CHST14	Glycogene	false
105755	CCDC101	TF	false
105756	CDK8	TF	false
105836	UST	Glycogene	false
105757	CDK9	TF	false
105758	DPM2	Glycogene	false
105759	PIGQ	Glycogene	false
105760	MAN1B1	Glycogene	false
105722	DPM3	Glycogene	false
106851	GALT	Glycogene	false
105782	B4GALT7	Glycogene	false
110804	SGSH	Glycogene	false
105685	FUT7	Glycogene	false
105753	GALK1	Glycogene	false
109684	XYLT2	Glycogene	false
105764	CEBPA	TF	false
105724	MGAT1	Glycogene	false
106000	HPSE	Glycogene	false
105778	GAL3ST4	Glycogene	false
106856	FUCA1	Glycogene	false
106855	ST6GAL1	Glycogene	false
107274	B4GALT1	Glycogene	false
105810	FUT4	Glycogene	false
105811	ST3GAL6	Glycogene	false
107306	GALNT2	Glycogene	false
110791	CEBPG	TF	false
105709	HAS2	Glycogene	false
108564	CEBPZ	TF	false
106893	STT3A	Glycogene	false
105770	CHD2	TF	false
109689	PIGG	Glycogene	false
105696	SLC35F5	Glycogene	false
105773	CHD4	TF	false
108565	CHD5	TF	false
112217	CHD7	TF	false
114934	NDST4	Glycogene	false
105774	CHD8	TF	false
106849	CLOCK	TF	false
105780	CPSF3L	TF	false
105781	B3GALT6	Glycogene	false
107986	SLC35C2	Glycogene	false
108559	GALE	Glycogene	false
105783	POMGNT1	Glycogene	false
105917	B4GALT2	Glycogene	false
108612	CHST5	Glycogene	false
107289	FUT3	Glycogene	false
108560	GAA	Glycogene	false
105918	MGAT4B	Glycogene	false
108574	GUSB	Glycogene	false
105765	NAGK	Glycogene	false
111112	SLC35E4	Glycogene	false
105785	CREB1	TF	false
105790	CREBBP	TF	false
108568	CSNK2A1	TF	false
105793	CTBP1	TF	false
105763	CHST12	Glycogene	false
114935	CTCF	TF	false
105794	CTNNB1	TF	false
108569	DAXX	TF	false
106850	DCP1A	TF	false
112218	DDX5	TF	false
108570	DOT1L	TF	false
108023	POMT2	Glycogene	false
107284	E2F3	TF	false
108556	PMM2	Glycogene	false
105801	E2F6	TF	false
105825	ELF2	TF	false
105828	ELL	TF	false
105829	EP400	TF	false
105908	B3GALNT2	Glycogene	false
105843	ARSB	Glycogene	false
107292	ERCC3	TF	false
105830	ERCC6	TF	false
105832	ERG	TF	false
108579	ST3GAL1	Glycogene	false
105768	A4GALT	Glycogene	false
105920	ST6GALNAC1	Glycogene	false
114936	SULT1B1	Glycogene	false
105839	ETS1	TF	false
108572	SLC35B2	Glycogene	false
105732	SLC35E3	Glycogene	false
107309	GBA	Glycogene	false
105842	ETV1	TF	false
105846	EZH1	TF	false
106005	COG1	Glycogene	false
108582	EZH2	TF	false
105848	FLI1	TF	false
105766	MFNG	Glycogene	false
105869	CTBS	Glycogene	false
105849	FOS	TF	false
107298	FOXK1	TF	false
106862	FUS	TF	false
113217	NEU4	Glycogene	false
105861	GABPA	TF	false
105864	ALG13	Glycogene	false
114937	GLI3	TF	false
112220	GLIS3	TF	false
105866	GLYR1	TF	false
106865	GPS2	TF	false
114938	GRHL3	TF	false
105870	GTF2F1	TF	false
107971	NEU1	Glycogene	false
105871	GTF2I	TF	false
105893	MGAT5	Glycogene	false
110795	GTF3C1	TF	false
107302	GTF3C2	TF	false
105872	H2AFX	TF	false
105881	GPAA1	Glycogene	false
108555	DDOST	Glycogene	false
105873	HCFC1	TF	false
108592	HDAC2	TF	false
108593	HDAC6	TF	false
108594	SULT1A3	Glycogene	false
107281	SLC35B3	Glycogene	false
114939	HDAC8	TF	false
105875	HECTD1	TF	false
105876	HES4	TF	false
112221	HEXIM1	TF	false
109679	HEY1	TF	false
106867	HIF1A	TF	false
106861	CHST15	Glycogene	false
107290	ASAH1	Glycogene	false
105877	HINFP	TF	false
111102	HMGN3	TF	false
114940	ID3	TF	false
111090	PIGV	Glycogene	false
105882	IKZF1	TF	false
105776	LAMP3	Glycogene	false
105777	MAN2B1	Glycogene	false
105860	NPL	Glycogene	false
108567	NAGA	Glycogene	false
105897	GBGT1	Glycogene	false
105719	GFPT2	Glycogene	false
105885	INO80	TF	false
105886	INTS3	TF	false
105890	IRF8	TF	false
107311	JARID2	TF	false
105892	JMJD1C	TF	false
105894	JMJD6	TF	false
105895	JUN	TF	false
105899	JUND	TF	false
105900	KAT5	TF	false
105901	KDM1A	TF	false
106879	ALG6	Glycogene	false
107313	KDM2B	TF	false
105903	KDM3A	TF	false
106874	KDM4A	TF	false
105904	KDM5A	TF	false
105905	GNS	Glycogene	false
105907	KDM5B	TF	false
107279	B4GALT5	Glycogene	false
107314	KDM5C	TF	false
107315	KDM6B	TF	false
114941	LHX2	TF	false
105940	SLC35F3	Glycogene	false
107331	B4GALT6	Glycogene	false
108600	STS	Glycogene	false
105927	SLC35F1	Glycogene	false
105750	MGAT3	Glycogene	false
108033	HS3ST3A1	Glycogene	false
114942	ARSF	Glycogene	false
106857	ST3GAL5	Glycogene	false
113216	B3GAT1	Glycogene	false
105909	LMO2	TF	false
107984	CTSA	Glycogene	false
114943	LMTK3	TF	false
105911	LYL1	TF	false
105912	RENBP	Glycogene	false
105859	HK3	Glycogene	false
105910	HS3ST1	Glycogene	false
106876	MAF	TF	false
105914	MAFB	TF	false
110799	MAFG	TF	false
106854	XYLT1	Glycogene	false
105916	MAZ	TF	false
108002	NANS	Glycogene	false
107323	MBD3	TF	false
105921	MECP2	TF	false
105845	SLC35B4	Glycogene	false
105924	MED1	TF	false
107324	MED12	TF	false
105925	MEF2A	TF	false
106835	PIGK	Glycogene	false
105716	MAN1A1	Glycogene	false
105976	FPGT	Glycogene	false
105926	MEF2C	TF	false
106853	MAN1C1	Glycogene	false
105844	EXTL2	Glycogene	false
106838	B3GNT2	Glycogene	false
106864	GPI	Glycogene	false
108605	GALNT9	Glycogene	false
107325	MEF2D	TF	false
106887	EXTL1	Glycogene	false
105929	MITF	TF	false
107350	LAMP2	Glycogene	false
105883	GM2A	Glycogene	false
105694	MAN2A1	Glycogene	false
108561	GALNT6	Glycogene	false
105815	ST6GALNAC3	Glycogene	false
106859	GALNT7	Glycogene	false
107981	LAMP1	Glycogene	false
114944	AGA	Glycogene	false
110801	MNT	TF	false
109683	MXD1	TF	false
105934	MYBL1	TF	false
108009	MYC	TF	false
105942	MZF1	TF	false
107326	NCOR2	TF	false
108604	NEUROD2	TF	false
105943	NFAT5	TF	false
105945	NFIC	TF	false
107329	NFYA	TF	false
106844	SLC35E1	Glycogene	false
105947	NIPBL	TF	false
114945	NKX2-2	TF	false
108016	NOTCH1	TF	false
105948	NPAT	TF	false
114946	NR1D1	TF	false
105949	NR2C2	TF	false
105951	NR2F1	TF	false
107333	NRF1	TF	false
105761	POMT1	Glycogene	false
108607	PAX6	TF	false
105817	HPSE2	Glycogene	false
106883	SULF1	Glycogene	false
105953	PBX1	TF	false
108608	PCGF2	TF	false
105956	PHF20	TF	false
105957	PHF6	TF	false
107334	PHF8	TF	false
105958	PIAS1	TF	false
108034	B3GALT5	Glycogene	false
110808	PIAS4	TF	false
105959	POLR2B	TF	false
105960	POLR3A	TF	false
107299	EXTL3	Glycogene	false
108609	POLR3D	TF	false
107296	GCNT2	Glycogene	false
114947	GALNT13	Glycogene	false
114948	POLR3GL	TF	false
106880	POU2F2	TF	false
106881	PPARA	TF	false
105923	NDST1	Glycogene	false
110809	PPARGC1A	TF	false
108021	PRDM4	TF	false
105964	RAC3	TF	false
106884	RARA	TF	false
105965	RB1	TF	false
105703	GALNT4	Glycogene	false
109675	GLB1	Glycogene	false
105967	RBBP5	TF	false
105968	RBL2	TF	false
113233	RBPJ	TF	false
108024	RELA	TF	false
108586	SLC35A4	Glycogene	false
109680	NAGLU	Glycogene	false
105972	RFX5	TF	false
105974	RFX7	TF	false
108613	RING1	TF	false
105734	ALG12	Glycogene	false
105975	RNF2	TF	false
114949	SAP30	TF	false
112227	B4GALT4	Glycogene	false
108614	SATB1	TF	false
107339	SETDB1	TF	false
108616	SFPQ	TF	false
105984	SIN3A	TF	false
106885	SIRT6	TF	false
113219	GMDS	Glycogene	false
107341	SMAD1	TF	false
105987	SMAD4	TF	false
107343	SMARCA4	TF	false
108617	SMARCB1	TF	false
105989	SMC1A	TF	false
105990	SMC3	TF	false
108618	SNAPC1	TF	false
105991	SOX10	TF	false
107998	ST3GAL4	Glycogene	false
105748	MAN2A2	Glycogene	false
108004	B3GNT7	Glycogene	false
108619	SOX11	TF	false
107345	SOX2	TF	false
114950	SOX3	TF	false
108620	SOX4	TF	false
108621	SOX9	TF	false
107346	SP2	TF	false
110813	SP4	TF	false
108028	SRC	TF	false
105994	SRCAP	TF	false
114951	SREBF1	TF	false
108029	STAT5B	TF	false
106004	SUMO2	TF	false
108622	SUPT5H	TF	false
107287	FUT2	Glycogene	false
106006	TAF1	TF	false
107351	TAF3	TF	false
108623	TAF7	TF	false
108624	TAL1	TF	false
108030	TBP	TF	false
106007	TCF12	TF	false
106009	TCF7L1	TF	false
114952	CTNS	Glycogene	false
106011	TDRD3	TF	false
106013	TEAD1	TF	false
106015	TERF1	TF	false
106016	TET2	TF	false
113234	TFAM	TF	false
107355	TFCP2	TF	false
108626	THAP1	TF	false
106890	THAP11	TF	false
106839	ST6GALNAC4	Glycogene	false
114953	TLE3	TF	false
110814	TOP1	TF	false
108627	TP53	TF	false
108628	TRRAP	TF	false
111116	TTF1	TF	false
106020	UBTF	TF	false
106021	USF1	TF	false
106022	USF2	TF	false
113235	USP49	TF	false
106023	VEZF1	TF	false
106024	WDR5	TF	false
109692	WRNIP1	TF	false
106894	ZBTB10	TF	false
106029	ZBTB17	TF	false
106031	ZBTB33	TF	false
