# Supplementary material for: A systems-based framework to computationally describe putative transcription factors and signaling pathways regulating glycan biosynthesis
Source: publisher site journal article supplement (doi:10.3762/bjoc.17.119), 2021-07-22
Supplement: Additional file 2 [file 1860-5397-17-119-S2.cys › CytoscapeSession-2021_03_21-12_01/tables/116589-LIHC/LOCAL_ATTRS-org.cytoscape.model.CyEdge-LIHC+default+edge.cytable]

CyCSV-Version	1
SUID	interaction	name	selected
java.lang.Long	java.lang.String	java.lang.String	java.lang.Boolean
LIHC default edge
116611	interacts with	AHR (interacts with) GCNT4	false
116612	interacts with	AR (interacts with) MAN2A1	false
116613	interacts with	AR (interacts with) ACER2	false
116614	interacts with	AR (interacts with) UGCG	false
116615	interacts with	AR (interacts with) MAN1A2	false
116616	interacts with	AR (interacts with) SLC35A3	false
116617	interacts with	AR (interacts with) GNE	false
116618	interacts with	AR (interacts with) NEU3	false
116619	interacts with	AR (interacts with) LAMP2	false
116620	interacts with	AR (interacts with) PIGK	false
116621	interacts with	AR (interacts with) UGT1A3	false
116622	interacts with	AR (interacts with) UGT1A4	false
116623	interacts with	AR (interacts with) SULT1B1	false
116624	interacts with	AR (interacts with) UGT1A5	false
116625	interacts with	AR (interacts with) ST3GAL6	false
116626	interacts with	AR (interacts with) PGM1	false
116627	interacts with	AR (interacts with) CTBS	false
116628	interacts with	AR (interacts with) ARSD	false
116629	interacts with	AR (interacts with) UGT1A1	false
116630	interacts with	AR (interacts with) MAN1C1	false
116631	interacts with	AR (interacts with) COG3	false
116632	interacts with	AR (interacts with) PAPSS2	false
116633	interacts with	ARID3A (interacts with) RPN2	false
116634	interacts with	ARID3A (interacts with) MGAT4A	false
116635	interacts with	ARID3A (interacts with) UXS1	false
116636	interacts with	ARID3A (interacts with) GAL3ST1	false
116637	interacts with	ARID3A (interacts with) POFUT2	false
116638	interacts with	ARID3A (interacts with) GNPDA1	false
116639	interacts with	ARID3A (interacts with) SLC17A5	false
116640	interacts with	ARID3A (interacts with) B4GALT3	false
116641	interacts with	ARID3A (interacts with) SULT1C2	false
116642	interacts with	ARID3A (interacts with) PIGC	false
116643	interacts with	ARID3A (interacts with) SLC35D2	false
116644	interacts with	ARID3A (interacts with) SLC35A2	false
116645	interacts with	ARID3A (interacts with) CHPF2	false
116646	interacts with	ARID3A (interacts with) ALG12	false
116647	interacts with	ARID3A (interacts with) B4GALT4	false
116648	interacts with	ATF4 (interacts with) NANS	false
116649	interacts with	ATF4 (interacts with) B4GALT3	false
116650	interacts with	ATF4 (interacts with) SGSH	false
116651	interacts with	ATF4 (interacts with) FUT1	false
116652	interacts with	ATF4 (interacts with) CHST12	false
116653	interacts with	BATF (interacts with) NAGK	false
116654	interacts with	BATF (interacts with) GALNT6	false
116655	interacts with	BATF (interacts with) ST6GALNAC4	false
116656	interacts with	BATF (interacts with) CHST2	false
116657	interacts with	BCL3 (interacts with) CHST11	false
116658	interacts with	BMI1 (interacts with) ALG10B	false
116659	interacts with	BMI1 (interacts with) MAN1A2	false
116660	interacts with	BMI1 (interacts with) ALG10	false
116661	interacts with	BMI1 (interacts with) CSGALNACT2	false
116662	interacts with	BMI1 (interacts with) STT3B	false
116663	interacts with	BMI1 (interacts with) COG5	false
116664	interacts with	BMI1 (interacts with) UGCG	false
116665	interacts with	BMI1 (interacts with) GALNT1	false
116666	interacts with	BMI1 (interacts with) SLC35A3	false
116667	interacts with	BMI1 (interacts with) FKTN	false
116668	interacts with	BMI1 (interacts with) NEU3	false
116669	interacts with	BMI1 (interacts with) SLC35E3	false
116670	interacts with	BMI1 (interacts with) B4GALT6	false
116671	interacts with	BMI1 (interacts with) PAPSS1	false
116672	interacts with	CBX4 (interacts with) B4GALT3	false
116673	interacts with	CBX4 (interacts with) MOGS	false
116674	interacts with	CBX4 (interacts with) NEU1	false
116675	interacts with	CBX8 (interacts with) XYLT2	false
116676	interacts with	CBX8 (interacts with) B4GALT3	false
116677	interacts with	CBX8 (interacts with) MAN1B1	false
116678	interacts with	CEBPA (interacts with) CHST13	false
116679	interacts with	CEBPG (interacts with) FUT1	false
116680	interacts with	CREB3L4 (interacts with) B4GALT3	false
116681	interacts with	DDIT3 (interacts with) SLC35B1	false
116682	interacts with	DDIT3 (interacts with) FUT1	false
116683	interacts with	E2F1 (interacts with) PIGX	false
116684	interacts with	E2F1 (interacts with) DPM2	false
116685	interacts with	E2F1 (interacts with) SLC35C2	false
116686	interacts with	E2F1 (interacts with) RPN1	false
116687	interacts with	E2F1 (interacts with) RPN2	false
116688	interacts with	E2F1 (interacts with) MOGS	false
116689	interacts with	E2F1 (interacts with) B4GALT3	false
116690	interacts with	E2F1 (interacts with) SLC35B2	false
116691	interacts with	E2F1 (interacts with) ALG6	false
116692	interacts with	E2F1 (interacts with) B3GAT3	false
116693	interacts with	E2F1 (interacts with) B4GALT4	false
116694	interacts with	E2F1 (interacts with) PIGC	false
116695	interacts with	E2F8 (interacts with) GANAB	false
116696	interacts with	E2F8 (interacts with) MOGS	false
116697	interacts with	EGLN2 (interacts with) DPM2	false
116698	interacts with	ERF (interacts with) MOGS	false
116699	interacts with	ERF (interacts with) PIGW	false
116700	interacts with	ESR1 (interacts with) GNE	false
116701	interacts with	ESR1 (interacts with) LAMP2	false
116702	interacts with	FOXA1 (interacts with) GALNT4	false
116703	interacts with	FOXA1 (interacts with) PIGM	false
116704	interacts with	FOXA1 (interacts with) FKTN	false
116705	interacts with	FOXA1 (interacts with) POFUT1	false
116706	interacts with	FOXA1 (interacts with) MGAT2	false
116707	interacts with	FOXA1 (interacts with) GFPT1	false
116708	interacts with	FOXA1 (interacts with) RTF1	false
116709	interacts with	FOXA1 (interacts with) SLC35A1	false
116710	interacts with	FOXA2 (interacts with) PIGV	false
116711	interacts with	FOXA2 (interacts with) ST3GAL3	false
116712	interacts with	FOXP1 (interacts with) PIGC	false
116713	interacts with	FOXP1 (interacts with) B3GALNT2	false
116714	interacts with	FOXP1 (interacts with) FAM20B	false
116715	interacts with	GATA4 (interacts with) EXTL3	false
116716	interacts with	GATA4 (interacts with) PIGC	false
116717	interacts with	GATA4 (interacts with) UXS1	false
116718	interacts with	GATA4 (interacts with) B4GALT5	false
116719	interacts with	GATA4 (interacts with) ALG2	false
116720	interacts with	GATA4 (interacts with) PIGG	false
116721	interacts with	GATA4 (interacts with) MOGS	false
116722	interacts with	GATA6 (interacts with) CHSY1	false
116723	interacts with	HEYL (interacts with) GAL3ST4	false
116724	interacts with	HEYL (interacts with) B3GALT4	false
116725	interacts with	HNF1B (interacts with) GAL3ST1	false
116726	interacts with	HNF1B (interacts with) A4GNT	false
116727	interacts with	HNF4A (interacts with) SLC35A3	false
116728	interacts with	HNF4A (interacts with) POFUT1	false
116729	interacts with	HNF4A (interacts with) SLC35D1	false
116730	interacts with	HNF4A (interacts with) NEU3	false
116731	interacts with	HNF4A (interacts with) PIGO	false
116732	interacts with	HNF4A (interacts with) MAN2A1	false
116733	interacts with	HNF4A (interacts with) HS3ST3B1	false
116734	interacts with	HNF4A (interacts with) STT3B	false
116735	interacts with	HNF4A (interacts with) GNE	false
116736	interacts with	HNF4A (interacts with) PIGV	false
116737	interacts with	HNF4A (interacts with) SLC35A5	false
116738	interacts with	HNF4A (interacts with) GANAB	false
116739	interacts with	HNF4A (interacts with) MAN1A2	false
116740	interacts with	HNF4A (interacts with) NAGA	false
116741	interacts with	HNF4A (interacts with) SLC35E3	false
116742	interacts with	HNF4A (interacts with) ACER2	false
116743	interacts with	HNF4A (interacts with) GCNT4	false
116744	interacts with	HSF1 (interacts with) TSTA3	false
116745	interacts with	HSF1 (interacts with) GPAA1	false
116746	interacts with	HSF1 (interacts with) DPM2	false
116747	interacts with	HSF1 (interacts with) B4GALT2	false
116748	interacts with	HSF1 (interacts with) ALG3	false
116749	interacts with	HSF1 (interacts with) B4GALT3	false
116750	interacts with	HSF1 (interacts with) MAN1B1	false
116751	interacts with	HSF1 (interacts with) SGSH	false
116752	interacts with	IRF1 (interacts with) HK3	false
116753	interacts with	IRF1 (interacts with) LAMP3	false
116754	interacts with	IRF1 (interacts with) ST8SIA4	false
116755	interacts with	IRF1 (interacts with) CHST11	false
116756	interacts with	IRF1 (interacts with) HPSE	false
116757	interacts with	IRF1 (interacts with) GCNT1	false
116758	interacts with	IRF3 (interacts with) B3GAT3	false
116759	interacts with	IRF3 (interacts with) B3GALT6	false
116760	interacts with	IRF3 (interacts with) MAN1B1	false
116761	interacts with	IRF3 (interacts with) DPM2	false
116762	interacts with	IRF3 (interacts with) CHST12	false
116763	interacts with	IRF3 (interacts with) ST6GALNAC4	false
116764	interacts with	IRF5 (interacts with) XYLT2	false
116765	interacts with	IRF8 (interacts with) ST8SIA4	false
116766	interacts with	JMJD6 (interacts with) COG1	false
116767	interacts with	JMJD6 (interacts with) SLC35B1	false
116768	interacts with	JMJD6 (interacts with) NANS	false
116769	interacts with	JMJD6 (interacts with) B4GALT3	false
116770	interacts with	JMJD6 (interacts with) DPM2	false
116771	interacts with	JMJD6 (interacts with) SGSH	false
116772	interacts with	JMJD6 (interacts with) SLC35E4	false
116773	interacts with	JMJD6 (interacts with) NEU1	false
116774	interacts with	JMJD6 (interacts with) RPN2	false
116775	interacts with	JMJD6 (interacts with) GNPDA1	false
116776	interacts with	JMJD6 (interacts with) NAGK	false
116777	interacts with	JMJD6 (interacts with) MAN1B1	false
116778	interacts with	JMJD6 (interacts with) CHST12	false
116779	interacts with	KAT2B (interacts with) SLC35A3	false
116780	interacts with	KAT2B (interacts with) NEU3	false
116781	interacts with	KAT2B (interacts with) FPGT	false
116782	interacts with	KAT2B (interacts with) MAN1A1	false
116783	interacts with	KAT2B (interacts with) STT3B	false
116784	interacts with	KAT2B (interacts with) CSGALNACT2	false
116785	interacts with	KAT2B (interacts with) CTBS	false
116786	interacts with	KAT2B (interacts with) SLC35A5	false
116787	interacts with	KAT2B (interacts with) PIGK	false
116788	interacts with	KAT2B (interacts with) ACER2	false
116789	interacts with	KAT2B (interacts with) GNE	false
116790	interacts with	KAT2B (interacts with) SLC35D1	false
116791	interacts with	KAT2B (interacts with) MGAT2	false
116792	interacts with	KAT2B (interacts with) SLC35F5	false
116793	interacts with	KAT2B (interacts with) HS3ST3B1	false
116794	interacts with	KAT2B (interacts with) GALNT1	false
116795	interacts with	KAT2B (interacts with) UGT1A1	false
116796	interacts with	KAT2B (interacts with) UGP2	false
116797	interacts with	KAT2B (interacts with) PIGV	false
116798	interacts with	LEO1 (interacts with) SLC35E3	false
116799	interacts with	LMNA (interacts with) DAD1	false
116800	interacts with	MBD3 (interacts with) DPM2	false
116801	interacts with	MXD3 (interacts with) NANS	false
116802	interacts with	MXD3 (interacts with) DPM2	false
116803	interacts with	MXD3 (interacts with) DAD1	false
116804	interacts with	MXD3 (interacts with) MAN1B1	false
116805	interacts with	MYBL2 (interacts with) RPN2	false
116806	interacts with	MYBL2 (interacts with) RPN1	false
116807	interacts with	MYBL2 (interacts with) ALG3	false
116808	interacts with	MYBL2 (interacts with) SLC35A2	false
116809	interacts with	MYBL2 (interacts with) B4GALT3	false
116810	interacts with	MYBL2 (interacts with) MOGS	false
116811	interacts with	MYBL2 (interacts with) NANS	false
116812	interacts with	MYBL2 (interacts with) GNPDA1	false
116813	interacts with	MYBL2 (interacts with) GAL3ST1	false
116814	interacts with	MYBL2 (interacts with) PIGC	false
116815	interacts with	NCAPG (interacts with) DPM1	false
116816	interacts with	NCAPG (interacts with) ALG10	false
116817	interacts with	NCAPG (interacts with) ALG6	false
116818	interacts with	NCAPG (interacts with) RPN1	false
116819	interacts with	NCAPG (interacts with) RPN2	false
116820	interacts with	NCAPG (interacts with) PIGX	false
116821	interacts with	NCAPG (interacts with) B4GALT3	false
116822	interacts with	NCAPG (interacts with) MOGS	false
116823	interacts with	NCAPG (interacts with) PIGC	false
116824	interacts with	NCAPG (interacts with) UXS1	false
116825	interacts with	NCAPG (interacts with) COG1	false
116826	interacts with	NCAPG (interacts with) NEU1	false
116827	interacts with	NCAPG (interacts with) PAPSS1	false
116828	interacts with	NCAPG (interacts with) POFUT2	false
116829	interacts with	NCAPG (interacts with) MGAT4A	false
116830	interacts with	NCAPG (interacts with) NAGK	false
116831	interacts with	NCAPG (interacts with) LAMP3	false
116832	interacts with	NFIC (interacts with) MGAT5	false
116833	interacts with	NFIC (interacts with) FUT11	false
116834	interacts with	NFIC (interacts with) SLC35E1	false
116835	interacts with	NFIC (interacts with) GALNT10	false
116836	interacts with	NFIC (interacts with) GANAB	false
116837	interacts with	NFIC (interacts with) PIGO	false
116838	interacts with	NFIC (interacts with) STT3B	false
116839	interacts with	NFIC (interacts with) SLC35A3	false
116840	interacts with	NFIC (interacts with) FKTN	false
116841	interacts with	NFIC (interacts with) UGCG	false
116842	interacts with	NFIC (interacts with) RTF1	false
116843	interacts with	NFIC (interacts with) GNE	false
116844	interacts with	NFIC (interacts with) MAN2A2	false
116845	interacts with	NFIC (interacts with) SLC35E3	false
116846	interacts with	NFIC (interacts with) SLC35A5	false
116847	interacts with	NFIC (interacts with) SLC35F5	false
116848	interacts with	NFIC (interacts with) SLC35B4	false
116849	interacts with	NFIC (interacts with) ALG10B	false
116850	interacts with	NFIC (interacts with) CTBS	false
116851	interacts with	NFIC (interacts with) COG3	false
116852	interacts with	NR2F1 (interacts with) HS3ST3B1	false
116853	interacts with	NR2F1 (interacts with) COG6	false
116854	interacts with	NR2F1 (interacts with) NEU3	false
116855	interacts with	NR5A2 (interacts with) UAP1	false
116856	interacts with	NR5A2 (interacts with) FAM20B	false
116857	interacts with	NR5A2 (interacts with) MAN2A2	false
116858	interacts with	NR5A2 (interacts with) POFUT1	false
116859	interacts with	NR5A2 (interacts with) RTF1	false
116860	interacts with	PBX3 (interacts with) FKTN	false
116861	interacts with	PBX3 (interacts with) EXT2	false
116862	interacts with	PBX3 (interacts with) GALNT4	false
116863	interacts with	PBX3 (interacts with) UGCG	false
116864	interacts with	PBX3 (interacts with) PIGX	false
116865	interacts with	PBX3 (interacts with) B3GNT5	false
116866	interacts with	PBX3 (interacts with) B4GALT5	false
116867	interacts with	PBX3 (interacts with) GFPT1	false
116868	interacts with	PCGF6 (interacts with) PIGW	false
116869	interacts with	PDX1 (interacts with) FUT4	false
116870	interacts with	PDX1 (interacts with) B4GALNT2	false
116871	interacts with	PDX1 (interacts with) A4GNT	false
116872	interacts with	PHF8 (interacts with) OGT	false
116873	interacts with	PHF8 (interacts with) ACER2	false
116874	interacts with	PHF8 (interacts with) STT3B	false
116875	interacts with	PHF8 (interacts with) PIGN	false
116876	interacts with	PHF8 (interacts with) MAN1A2	false
116877	interacts with	PHF8 (interacts with) FKTN	false
116878	interacts with	PHF8 (interacts with) SLC35A5	false
116879	interacts with	PHF8 (interacts with) SLC35A3	false
116880	interacts with	PHF8 (interacts with) ALG10B	false
116881	interacts with	PHF8 (interacts with) SLC35D1	false
116882	interacts with	PHF8 (interacts with) SLC35F5	false
116883	interacts with	PHF8 (interacts with) COG3	false
116884	interacts with	PHF8 (interacts with) SLC35E3	false
116885	interacts with	PPARA (interacts with) STT3B	false
116886	interacts with	PPARA (interacts with) MAN2A1	false
116887	interacts with	PPARG (interacts with) SLC35D2	false
116888	interacts with	RAC3 (interacts with) HYAL3	false
116889	interacts with	RBCK1 (interacts with) B4GALT3	false
116890	interacts with	RING1 (interacts with) RFNG	false
116891	interacts with	RING1 (interacts with) MOGS	false
116892	interacts with	RING1 (interacts with) MPI	false
116893	interacts with	RING1 (interacts with) ST3GAL3	false
116894	interacts with	SCML2 (interacts with) OGT	false
116895	interacts with	SCML2 (interacts with) PIGW	false
116896	interacts with	SCML2 (interacts with) SLC35E3	false
116897	interacts with	SCML2 (interacts with) STT3B	false
116898	interacts with	SCML2 (interacts with) PIGN	false
116899	interacts with	SCML2 (interacts with) PIGC	false
116900	interacts with	SCML2 (interacts with) C1GALT1	false
116901	interacts with	SCML2 (interacts with) PIGM	false
116902	interacts with	SCML2 (interacts with) MOGS	false
116903	interacts with	SCML2 (interacts with) NDST2	false
116904	interacts with	SCML2 (interacts with) COG5	false
116905	interacts with	SCML2 (interacts with) SLC35A2	false
116906	interacts with	SCML2 (interacts with) CMAS	false
116907	interacts with	SCML2 (interacts with) B4GALT3	false
116908	interacts with	SCML2 (interacts with) PIGO	false
116909	interacts with	SCML2 (interacts with) ALG8	false
116910	interacts with	SFMBT1 (interacts with) STT3B	false
116911	interacts with	SFMBT1 (interacts with) SLC35A5	false
116912	interacts with	SFMBT1 (interacts with) PIGN	false
116913	interacts with	SFMBT1 (interacts with) GNB1	false
116914	interacts with	SFMBT1 (interacts with) GALNT1	false
116915	interacts with	SFMBT1 (interacts with) SLC35E3	false
116916	interacts with	SFMBT1 (interacts with) PIGW	false
116917	interacts with	SFMBT1 (interacts with) FUT10	false
116918	interacts with	SFMBT1 (interacts with) EXT2	false
116919	interacts with	SIX5 (interacts with) MOGS	false
116920	interacts with	SIX5 (interacts with) SGSH	false
116921	interacts with	SIX5 (interacts with) POFUT2	false
116922	interacts with	SIX5 (interacts with) ALG12	false
116923	interacts with	SIX5 (interacts with) PIGC	false
116924	interacts with	SIX5 (interacts with) B4GALT3	false
116925	interacts with	SIX5 (interacts with) SLC35B2	false
116926	interacts with	SIX5 (interacts with) B3GALNT2	false
116927	interacts with	SIX5 (interacts with) NDST2	false
116928	interacts with	SND1 (interacts with) SLC35A2	false
116929	interacts with	SND1 (interacts with) GANAB	false
116930	interacts with	SREBF2 (interacts with) ALG12	false
116931	interacts with	SREBF2 (interacts with) GANAB	false
116932	interacts with	SREBF2 (interacts with) SLC35E3	false
116933	interacts with	SREBF2 (interacts with) MAN2A2	false
116934	interacts with	SREBF2 (interacts with) NDST2	false
116935	interacts with	SREBF2 (interacts with) RTF1	false
116936	interacts with	SREBF2 (interacts with) XYLT2	false
116937	interacts with	SREBF2 (interacts with) MOGS	false
116938	interacts with	STAT1 (interacts with) LAMP3	false
116939	interacts with	STAT1 (interacts with) ST8SIA4	false
116940	interacts with	STAT1 (interacts with) HPSE	false
116941	interacts with	STAT1 (interacts with) GALNT6	false
116942	interacts with	STAT1 (interacts with) ST8SIA1	false
116943	interacts with	STAT4 (interacts with) ST8SIA4	false
116944	interacts with	STAT4 (interacts with) GBGT1	false
116945	interacts with	STAT4 (interacts with) CHST11	false
116946	interacts with	STAT4 (interacts with) GAL3ST4	false
116947	interacts with	TAT (interacts with) SLC35D1	false
116948	interacts with	TAT (interacts with) UGP2	false
116949	interacts with	TBL1X (interacts with) FUT11	false
116950	interacts with	TBL1X (interacts with) GLB1	false
116951	interacts with	TBX3 (interacts with) HS6ST1	false
116952	interacts with	TCF7 (interacts with) ARSB	false
116953	interacts with	TCF7L1 (interacts with) B4GALT4	false
116954	interacts with	USF1 (interacts with) DPM3	false
116955	interacts with	USF1 (interacts with) B4GALT3	false
116956	interacts with	USF1 (interacts with) DPM2	false
116957	interacts with	USF1 (interacts with) GMPPA	false
116958	interacts with	USF1 (interacts with) B4GALT7	false
116959	interacts with	USF1 (interacts with) DAD1	false
116960	interacts with	WDR5 (interacts with) DPM2	false
116961	interacts with	WDR5 (interacts with) POMT1	false
116962	interacts with	WDR5 (interacts with) MAN1B1	false
116963	interacts with	WDR5 (interacts with) MOGS	false
116964	interacts with	WDR5 (interacts with) B4GALT3	false
116965	interacts with	WDR5 (interacts with) SLC35B2	false
116966	interacts with	WDR5 (interacts with) PIGC	false
116967	interacts with	WDR5 (interacts with) SGSH	false
116968	interacts with	WDR5 (interacts with) EXTL3	false
116969	interacts with	WDR5 (interacts with) B3GALNT2	false
116970	interacts with	ZBTB33 (interacts with) FKTN	false
116971	interacts with	ZBTB33 (interacts with) SLC35A5	false
116972	interacts with	ZBTB33 (interacts with) COG5	false
116973	interacts with	ZBTB33 (interacts with) OGT	false
116974	interacts with	ZBTB33 (interacts with) SLC35F5	false
116975	interacts with	ZBTB33 (interacts with) UGGT1	false
116976	interacts with	ZBTB33 (interacts with) PIGN	false
116977	interacts with	ZBTB33 (interacts with) B3GALNT2	false
116978	interacts with	ZBTB33 (interacts with) LAMP2	false
116979	interacts with	ZBTB33 (interacts with) FUT11	false
116980	interacts with	ZBTB33 (interacts with) ACER2	false
116981	interacts with	ZBTB33 (interacts with) RTF1	false
116982	interacts with	ZBTB33 (interacts with) NDST2	false
116983	interacts with	ZBTB33 (interacts with) ST3GAL2	false
116984	interacts with	ZBTB33 (interacts with) GALNT2	false
