# Supplementary material for: A systems-based framework to computationally describe putative transcription factors and signaling pathways regulating glycan biosynthesis
Source: publisher site journal article supplement (doi:10.3762/bjoc.17.119), 2021-07-22
Supplement: Additional file 2 [file 1860-5397-17-119-S2.cys › CytoscapeSession-2021_03_21-12_01/tables/116589-LIHC/LOCAL_ATTRS-org.cytoscape.model.CyNode-LIHC+default+node.cytable]

CyCSV-Version	1
SUID	name	nodeType	selected
java.lang.Long	java.lang.String	java.lang.String	java.lang.Boolean
		mutable
LIHC default node
106836	AHR	TF	false
106858	GCNT4	Glycogene	false
105693	AR	TF	false
105694	MAN2A1	Glycogene	false
105691	ACER2	Glycogene	false
105985	UGCG	Glycogene	false
105687	MAN1A2	Glycogene	false
105695	SLC35A3	Glycogene	false
107297	GNE	Glycogene	false
105689	NEU3	Glycogene	false
107350	LAMP2	Glycogene	false
106835	PIGK	Glycogene	false
109688	UGT1A3	Glycogene	false
116599	UGT1A4	Glycogene	false
114936	SULT1B1	Glycogene	false
116600	UGT1A5	Glycogene	false
105811	ST3GAL6	Glycogene	false
116601	PGM1	Glycogene	false
105869	CTBS	Glycogene	false
112230	ARSD	Glycogene	false
116602	UGT1A1	Glycogene	false
106853	MAN1C1	Glycogene	false
105823	COG3	Glycogene	false
107328	PAPSS2	Glycogene	false
107970	ARID3A	TF	false
105854	RPN2	Glycogene	false
106860	MGAT4A	Glycogene	false
109669	UXS1	Glycogene	false
116603	GAL3ST1	Glycogene	false
107327	POFUT2	Glycogene	false
107305	GNPDA1	Glycogene	false
108005	SLC17A5	Glycogene	false
105789	B4GALT3	Glycogene	false
116604	SULT1C2	Glycogene	false
108558	PIGC	Glycogene	false
116605	SLC35D2	Glycogene	false
107335	SLC35A2	Glycogene	false
108007	CHPF2	Glycogene	false
105734	ALG12	Glycogene	false
112227	B4GALT4	Glycogene	false
108550	ATF4	TF	false
108002	NANS	Glycogene	false
110804	SGSH	Glycogene	false
105802	FUT1	Glycogene	false
105763	CHST12	Glycogene	false
105721	BATF	TF	false
105765	NAGK	Glycogene	false
108561	GALNT6	Glycogene	false
106839	ST6GALNAC4	Glycogene	false
105838	CHST2	Glycogene	false
111092	BCL3	TF	false
105718	CHST11	Glycogene	false
105726	BMI1	TF	false
105727	ALG10B	Glycogene	false
105711	ALG10	Glycogene	false
105715	CSGALNACT2	Glycogene	false
105688	STT3B	Glycogene	false
105692	COG5	Glycogene	false
106014	GALNT1	Glycogene	false
105713	FKTN	Glycogene	false
105732	SLC35E3	Glycogene	false
107331	B4GALT6	Glycogene	false
107291	PAPSS1	Glycogene	false
105743	CBX4	TF	false
105762	MOGS	Glycogene	false
107971	NEU1	Glycogene	false
105752	CBX8	TF	false
109684	XYLT2	Glycogene	false
105760	MAN1B1	Glycogene	false
105764	CEBPA	TF	false
105913	CHST13	Glycogene	false
110791	CEBPG	TF	false
105788	CREB3L4	TF	false
110793	DDIT3	TF	false
105798	SLC35B1	Glycogene	false
105796	E2F1	TF	false
107980	PIGX	Glycogene	false
105758	DPM2	Glycogene	false
107986	SLC35C2	Glycogene	false
105936	RPN1	Glycogene	false
108572	SLC35B2	Glycogene	false
106879	ALG6	Glycogene	false
105754	B3GAT3	Glycogene	false
108575	E2F8	TF	false
105998	GANAB	Glycogene	false
105813	EGLN2	TF	false
105831	ERF	TF	false
105729	PIGW	Glycogene	false
112219	ESR1	TF	false
105850	FOXA1	TF	false
105703	GALNT4	Glycogene	false
105954	PIGM	Glycogene	false
105792	POFUT1	Glycogene	false
106868	MGAT2	Glycogene	false
106882	GFPT1	Glycogene	false
105700	RTF1	Glycogene	false
108001	SLC35A1	Glycogene	false
116606	FOXA2	TF	false
111090	PIGV	Glycogene	false
105747	ST3GAL3	Glycogene	false
113218	FOXP1	TF	false
105908	B3GALNT2	Glycogene	false
105731	FAM20B	Glycogene	false
116607	GATA4	TF	false
107299	EXTL3	Glycogene	false
107279	B4GALT5	Glycogene	false
109671	ALG2	Glycogene	false
109689	PIGG	Glycogene	false
105862	GATA6	TF	false
105717	CHSY1	Glycogene	false
107993	HEYL	TF	false
105778	GAL3ST4	Glycogene	false
106030	B3GALT4	Glycogene	false
107994	HNF1B	TF	false
111099	A4GNT	Glycogene	false
107995	HNF4A	TF	false
105950	SLC35D1	Glycogene	false
105874	PIGO	Glycogene	false
105841	HS3ST3B1	Glycogene	false
105702	SLC35A5	Glycogene	false
108567	NAGA	Glycogene	false
105879	HSF1	TF	false
105880	TSTA3	Glycogene	false
105881	GPAA1	Glycogene	false
105917	B4GALT2	Glycogene	false
105797	ALG3	Glycogene	false
105887	IRF1	TF	false
105859	HK3	Glycogene	false
105776	LAMP3	Glycogene	false
105834	ST8SIA4	Glycogene	false
106000	HPSE	Glycogene	false
108552	GCNT1	Glycogene	false
106872	IRF3	TF	false
105781	B3GALT6	Glycogene	false
105889	IRF5	TF	false
105890	IRF8	TF	false
105894	JMJD6	TF	false
106005	COG1	Glycogene	false
111112	SLC35E4	Glycogene	false
107312	KAT2B	TF	false
105976	FPGT	Glycogene	false
105716	MAN1A1	Glycogene	false
105696	SLC35F5	Glycogene	false
108584	UGP2	Glycogene	false
113227	LEO1	TF	false
116608	LMNA	TF	false
108008	DAD1	Glycogene	false
107323	MBD3	TF	false
105933	MXD3	TF	false
105935	MYBL2	TF	false
108602	NCAPG	TF	false
105799	DPM1	Glycogene	false
105945	NFIC	TF	false
105893	MGAT5	Glycogene	false
105690	FUT11	Glycogene	false
106844	SLC35E1	Glycogene	false
105697	GALNT10	Glycogene	false
105748	MAN2A2	Glycogene	false
105845	SLC35B4	Glycogene	false
105951	NR2F1	TF	false
105824	COG6	Glycogene	false
105952	NR5A2	TF	false
105820	UAP1	Glycogene	false
113231	PBX3	TF	false
107307	EXT2	Glycogene	false
105707	B3GNT5	Glycogene	false
113232	PCGF6	TF	false
108019	PDX1	TF	false
105810	FUT4	Glycogene	false
107352	B4GALNT2	Glycogene	false
107334	PHF8	TF	false
105771	OGT	Glycogene	false
105730	PIGN	Glycogene	false
106881	PPARA	TF	false
105961	PPARG	TF	false
105964	RAC3	TF	false
113220	HYAL3	Glycogene	false
108610	RBCK1	TF	false
108613	RING1	TF	false
105744	RFNG	Glycogene	false
107340	MPI	Glycogene	false
108025	SCML2	TF	false
109670	C1GALT1	Glycogene	false
105772	NDST2	Glycogene	false
105742	CMAS	Glycogene	false
107286	ALG8	Glycogene	false
108615	SFMBT1	TF	false
105902	GNB1	Glycogene	false
107278	FUT10	Glycogene	false
105986	SIX5	TF	false
110812	SND1	TF	false
105995	SREBF2	TF	false
105999	STAT1	TF	false
105840	ST8SIA1	Glycogene	false
106002	STAT4	TF	false
105897	GBGT1	Glycogene	false
116609	TAT	TF	false
111113	TBL1X	TF	false
109675	GLB1	Glycogene	false
116610	TBX3	TF	false
107996	HS6ST1	Glycogene	false
106008	TCF7	TF	false
105843	ARSB	Glycogene	false
106009	TCF7L1	TF	false
106021	USF1	TF	false
105722	DPM3	Glycogene	false
105787	GMPPA	Glycogene	false
105782	B4GALT7	Glycogene	false
106024	WDR5	TF	false
105761	POMT1	Glycogene	false
106031	ZBTB33	TF	false
105705	UGGT1	Glycogene	false
105806	ST3GAL2	Glycogene	false
107306	GALNT2	Glycogene	false
