# Supplementary material for: A systems-based framework to computationally describe putative transcription factors and signaling pathways regulating glycan biosynthesis
Source: publisher site journal article supplement (doi:10.3762/bjoc.17.119), 2021-07-22
Supplement: Additional file 2 [file 1860-5397-17-119-S2.cys › CytoscapeSession-2021_03_21-12_01/tables/116985-LUAD/LOCAL_ATTRS-org.cytoscape.model.CyEdge-LUAD+default+edge.cytable]

CyCSV-Version	1
SUID	interaction	name	selected
java.lang.Long	java.lang.String	java.lang.String	java.lang.Boolean
LUAD default edge
116996	interacts with	ADNP (interacts with) FUT7	false
116997	interacts with	AFF4 (interacts with) MAN1A2	false
116998	interacts with	AFF4 (interacts with) STT3B	false
116999	interacts with	AFF4 (interacts with) MAN2A1	false
117000	interacts with	AFF4 (interacts with) FAM20B	false
117001	interacts with	ATF2 (interacts with) MAN1A2	false
117002	interacts with	ATF2 (interacts with) MAN2A1	false
117003	interacts with	ATF2 (interacts with) FUT11	false
117004	interacts with	ATF2 (interacts with) SLC35F5	false
117005	interacts with	ATF2 (interacts with) ACER2	false
117006	interacts with	ATF2 (interacts with) NEU3	false
117007	interacts with	ATF2 (interacts with) UGGT1	false
117008	interacts with	ATF2 (interacts with) STT3B	false
117009	interacts with	ATF2 (interacts with) COG5	false
117010	interacts with	ATF2 (interacts with) COG6	false
117011	interacts with	ATF2 (interacts with) ALG10	false
117012	interacts with	ATF7IP (interacts with) ALG10	false
117013	interacts with	BACH1 (interacts with) CSGALNACT2	false
117014	interacts with	BACH1 (interacts with) MAN1A2	false
117015	interacts with	BACH1 (interacts with) B3GNT2	false
117016	interacts with	BACH1 (interacts with) B3GALNT1	false
117017	interacts with	BRCA1 (interacts with) PIGW	false
117018	interacts with	BRCA1 (interacts with) ALG10	false
117019	interacts with	BRCA1 (interacts with) GANAB	false
117020	interacts with	BRCA1 (interacts with) PIGX	false
117021	interacts with	BRCA1 (interacts with) GPI	false
117022	interacts with	BRD1 (interacts with) ALG12	false
117023	interacts with	BRD1 (interacts with) MAN2A2	false
117024	interacts with	BRD1 (interacts with) SGSH	false
117025	interacts with	BRD2 (interacts with) PIGO	false
117026	interacts with	BRD3 (interacts with) FAM20B	false
117027	interacts with	CAMTA2 (interacts with) SGSH	false
117028	interacts with	CBX3 (interacts with) DPM1	false
117029	interacts with	CBX3 (interacts with) GNPNAT1	false
117030	interacts with	CBX4 (interacts with) MOGS	false
117031	interacts with	CBX7 (interacts with) ST6GALNAC6	false
117032	interacts with	CBX7 (interacts with) MFNG	false
117033	interacts with	CBX7 (interacts with) ST8SIA1	false
117034	interacts with	CBX7 (interacts with) FUCA1	false
117035	interacts with	CBX7 (interacts with) ST3GAL6	false
117036	interacts with	CBX8 (interacts with) RFNG	false
117037	interacts with	CBX8 (interacts with) GALK1	false
117038	interacts with	CBX8 (interacts with) B3GAT3	false
117039	interacts with	CBX8 (interacts with) SLC35B1	false
117040	interacts with	CBX8 (interacts with) GPAA1	false
117041	interacts with	CDK12 (interacts with) GANAB	false
117042	interacts with	CDK8 (interacts with) ALG10	false
117043	interacts with	CDK9 (interacts with) DPM2	false
117044	interacts with	CDK9 (interacts with) PIGQ	false
117045	interacts with	CDK9 (interacts with) MAN1B1	false
117046	interacts with	CHD1 (interacts with) MAN2A1	false
117047	interacts with	CHD1 (interacts with) SLC35D1	false
117048	interacts with	CHD2 (interacts with) OGT	false
117049	interacts with	CHD2 (interacts with) NDST2	false
117050	interacts with	CHD2 (interacts with) MAN2A2	false
117051	interacts with	CHD7 (interacts with) FAM20B	false
117052	interacts with	CHD8 (interacts with) NEU3	false
117053	interacts with	CLOCK (interacts with) FUT11	false
117054	interacts with	CPSF3L (interacts with) B3GALT6	false
117055	interacts with	CPSF3L (interacts with) RFNG	false
117056	interacts with	CPSF3L (interacts with) PIGQ	false
117057	interacts with	CPSF3L (interacts with) SLC35C2	false
117058	interacts with	CPSF3L (interacts with) GALE	false
117059	interacts with	CPSF3L (interacts with) POMGNT1	false
117060	interacts with	CREB1 (interacts with) FUT11	false
117061	interacts with	CREBBP (interacts with) MAN1A2	false
117062	interacts with	CREBBP (interacts with) SLC35E1	false
117063	interacts with	DCP1A (interacts with) STT3B	false
117064	interacts with	DEK (interacts with) ALG10	false
117065	interacts with	DEK (interacts with) COG5	false
117066	interacts with	DNMT3A (interacts with) B3GALNT2	false
117067	interacts with	DNMT3A (interacts with) MOGS	false
117068	interacts with	DNMT3A (interacts with) B4GALT3	false
117069	interacts with	E2F1 (interacts with) PIGX	false
117070	interacts with	E2F1 (interacts with) PIGW	false
117071	interacts with	E2F1 (interacts with) POFUT1	false
117072	interacts with	E2F3 (interacts with) UGGT1	false
117073	interacts with	E2F3 (interacts with) PIGW	false
117074	interacts with	E2F3 (interacts with) POFUT1	false
117075	interacts with	E2F4 (interacts with) COG4	false
117076	interacts with	E2F8 (interacts with) GANAB	false
117077	interacts with	EBF1 (interacts with) CSGALNACT1	false
117078	interacts with	EBF1 (interacts with) ST6GALNAC3	false
117079	interacts with	EBF1 (interacts with) CHSY1	false
117080	interacts with	EBF1 (interacts with) SULF2	false
117081	interacts with	EBF1 (interacts with) CHST1	false
117082	interacts with	EBF1 (interacts with) HAS2	false
117083	interacts with	EBF1 (interacts with) MFNG	false
117084	interacts with	EBF1 (interacts with) XYLT1	false
117085	interacts with	EGR2 (interacts with) CSGALNACT2	false
117086	interacts with	EGR2 (interacts with) MFNG	false
117087	interacts with	EGR2 (interacts with) DSE	false
117088	interacts with	EGR2 (interacts with) ST8SIA1	false
117089	interacts with	EGR2 (interacts with) GM2A	false
117090	interacts with	EGR2 (interacts with) GAL3ST4	false
117091	interacts with	EGR2 (interacts with) ST3GAL2	false
117092	interacts with	EGR2 (interacts with) NPL	false
117093	interacts with	EGR2 (interacts with) MGAT3	false
117094	interacts with	ELF1 (interacts with) COG3	false
117095	interacts with	ELF1 (interacts with) COG6	false
117096	interacts with	ELF1 (interacts with) FUT10	false
117097	interacts with	ELK3 (interacts with) FUT11	false
117098	interacts with	ELK3 (interacts with) GAL3ST4	false
117099	interacts with	ELL (interacts with) ST3GAL2	false
117100	interacts with	EP400 (interacts with) MAN2A2	false
117101	interacts with	ERCC6 (interacts with) MAN1A2	false
117102	interacts with	ERCC6 (interacts with) NDST2	false
117103	interacts with	ERCC6 (interacts with) HK1	false
117104	interacts with	ERG (interacts with) MFNG	false
117105	interacts with	ERG (interacts with) ST6GALNAC3	false
117106	interacts with	ERG (interacts with) NDST1	false
117107	interacts with	ERG (interacts with) MAN1C1	false
117108	interacts with	ERG (interacts with) ST3GAL2	false
117109	interacts with	ERG (interacts with) ST6GALNAC6	false
117110	interacts with	ERG (interacts with) XYLT1	false
117111	interacts with	ESRRA (interacts with) B3GAT3	false
117112	interacts with	ETS1 (interacts with) CHST11	false
117113	interacts with	ETS1 (interacts with) MFNG	false
117114	interacts with	ETS1 (interacts with) NDST1	false
117115	interacts with	ETS1 (interacts with) CHSY1	false
117116	interacts with	ETS1 (interacts with) ST3GAL2	false
117117	interacts with	ETS1 (interacts with) LIPA	false
117118	interacts with	ETS1 (interacts with) GFPT2	false
117119	interacts with	ETS1 (interacts with) XYLT1	false
117120	interacts with	ETS1 (interacts with) MGAT5	false
117121	interacts with	ETS1 (interacts with) MAN1A1	false
117122	interacts with	ETS1 (interacts with) MAN2A1	false
117123	interacts with	ETS1 (interacts with) GM2A	false
117124	interacts with	ETS1 (interacts with) GAL3ST4	false
117125	interacts with	ETV1 (interacts with) HAS3	false
117126	interacts with	ETV1 (interacts with) GALNT10	false
117127	interacts with	EZH1 (interacts with) OGT	false
117128	interacts with	EZH1 (interacts with) NDST2	false
117129	interacts with	EZH2 (interacts with) PIGW	false
117130	interacts with	EZH2 (interacts with) B3GNT5	false
117131	interacts with	EZH2 (interacts with) CMAS	false
117132	interacts with	FANCD2 (interacts with) PIGW	false
117133	interacts with	FLI1 (interacts with) MFNG	false
117134	interacts with	FLI1 (interacts with) ST3GAL2	false
117135	interacts with	FLI1 (interacts with) FUT7	false
117136	interacts with	FLI1 (interacts with) MAN1C1	false
117137	interacts with	FLI1 (interacts with) CHST11	false
117138	interacts with	FLI1 (interacts with) HK3	false
117139	interacts with	FLI1 (interacts with) ST8SIA1	false
117140	interacts with	FLI1 (interacts with) CSGALNACT2	false
117141	interacts with	FLI1 (interacts with) NDST1	false
117142	interacts with	FLI1 (interacts with) HS3ST3B1	false
117143	interacts with	FLI1 (interacts with) GM2A	false
117144	interacts with	FLI1 (interacts with) GAL3ST4	false
117145	interacts with	FLI1 (interacts with) NDST2	false
117146	interacts with	FOSL1 (interacts with) B3GNT5	false
117147	interacts with	FOSL1 (interacts with) GFPT2	false
117148	interacts with	FOXK1 (interacts with) SLC35E1	false
117149	interacts with	FOXM1 (interacts with) ALG10	false
117150	interacts with	FOXM1 (interacts with) GANAB	false
117151	interacts with	FOXM1 (interacts with) GNPNAT1	false
117152	interacts with	FOXM1 (interacts with) ALG3	false
117153	interacts with	FOXM1 (interacts with) GPI	false
117154	interacts with	FOXO1 (interacts with) CSGALNACT1	false
117155	interacts with	FOXO1 (interacts with) SULT1C4	false
117156	interacts with	FOXP3 (interacts with) FUT7	false
117157	interacts with	FOXP3 (interacts with) HK3	false
117158	interacts with	FOXP3 (interacts with) CHST11	false
117159	interacts with	FOXP3 (interacts with) MFNG	false
117160	interacts with	FOXP3 (interacts with) ST8SIA1	false
117161	interacts with	FOXP3 (interacts with) GAL3ST4	false
117162	interacts with	FOXP3 (interacts with) NPL	false
117163	interacts with	FOXP3 (interacts with) ST3GAL2	false
117164	interacts with	FOXP3 (interacts with) HS3ST3B1	false
117165	interacts with	FOXP3 (interacts with) MAN2B1	false
117166	interacts with	FOXP3 (interacts with) GM2A	false
117167	interacts with	GABPA (interacts with) CSGALNACT2	false
117168	interacts with	GAPDH (interacts with) GPI	false
117169	interacts with	GATA3 (interacts with) CHST11	false
117170	interacts with	GATA3 (interacts with) ST8SIA1	false
117171	interacts with	GATA3 (interacts with) GM2A	false
117172	interacts with	GATA3 (interacts with) MAN1C1	false
117173	interacts with	GATA6 (interacts with) SULT1C4	false
117174	interacts with	GATA6 (interacts with) MFNG	false
117175	interacts with	GATA6 (interacts with) MGAT3	false
117176	interacts with	GATA6 (interacts with) GCNT4	false
117177	interacts with	GLYR1 (interacts with) COG7	false
117178	interacts with	GLYR1 (interacts with) ALG1	false
117179	interacts with	GMEB2 (interacts with) MOGS	false
117180	interacts with	GTF2B (interacts with) ALG14	false
117181	interacts with	GTF2B (interacts with) CTBS	false
117182	interacts with	GTF2B (interacts with) FPGT	false
117183	interacts with	GTF2I (interacts with) COG5	false
117184	interacts with	GTF3C2 (interacts with) B4GALT3	false
117185	interacts with	H2AFX (interacts with) B3GAT3	false
117186	interacts with	H2AFX (interacts with) RFNG	false
117187	interacts with	H2AFX (interacts with) GPI	false
117188	interacts with	HCFC1 (interacts with) PIGO	false
117189	interacts with	HCFC1 (interacts with) UGGT1	false
117190	interacts with	HCFC1 (interacts with) POFUT1	false
117191	interacts with	HCFC1 (interacts with) MAN2A2	false
117192	interacts with	HDAC6 (interacts with) OGT	false
117193	interacts with	HDAC6 (interacts with) MAN2A2	false
117194	interacts with	HDAC6 (interacts with) POFUT2	false
117195	interacts with	HDAC6 (interacts with) MOGS	false
117196	interacts with	HECTD1 (interacts with) FAM20B	false
117197	interacts with	HES4 (interacts with) GALK1	false
117198	interacts with	HIF1A (interacts with) MAN2A1	false
117199	interacts with	HIF1A (interacts with) CHSY1	false
117200	interacts with	HNF1B (interacts with) GAL3ST1	false
117201	interacts with	HNF1B (interacts with) B3GNT8	false
117202	interacts with	HOXB4 (interacts with) ST3GAL2	false
117203	interacts with	HSF1 (interacts with) TSTA3	false
117204	interacts with	HSF1 (interacts with) GPAA1	false
117205	interacts with	HSF1 (interacts with) RFNG	false
117206	interacts with	HSF1 (interacts with) ALG3	false
117207	interacts with	IKZF1 (interacts with) MFNG	false
117208	interacts with	IKZF1 (interacts with) ST8SIA4	false
117209	interacts with	IKZF1 (interacts with) MAN2B1	false
117210	interacts with	IKZF1 (interacts with) GM2A	false
117211	interacts with	IKZF1 (interacts with) FUT7	false
117212	interacts with	IKZF1 (interacts with) MAN1C1	false
117213	interacts with	IKZF1 (interacts with) NDST2	false
117214	interacts with	IKZF1 (interacts with) DSE	false
117215	interacts with	IKZF1 (interacts with) ST3GAL2	false
117216	interacts with	IKZF1 (interacts with) CHST11	false
117217	interacts with	IKZF1 (interacts with) MGAT3	false
117218	interacts with	INO80 (interacts with) RTF1	false
117219	interacts with	IRF1 (interacts with) HK3	false
117220	interacts with	IRF1 (interacts with) NAGK	false
117221	interacts with	IRF1 (interacts with) CHST11	false
117222	interacts with	IRF3 (interacts with) PIGQ	false
117223	interacts with	IRF3 (interacts with) PIGL	false
117224	interacts with	IRF3 (interacts with) FKRP	false
117225	interacts with	IRF4 (interacts with) MFNG	false
117226	interacts with	IRF4 (interacts with) FUT7	false
117227	interacts with	IRF4 (interacts with) ST8SIA1	false
117228	interacts with	IRF4 (interacts with) ST6GAL1	false
117229	interacts with	IRF5 (interacts with) HK3	false
117230	interacts with	IRF5 (interacts with) FUT7	false
117231	interacts with	IRF5 (interacts with) MFNG	false
117232	interacts with	IRF5 (interacts with) GM2A	false
117233	interacts with	IRF5 (interacts with) NAAA	false
117234	interacts with	IRF5 (interacts with) NAGA	false
117235	interacts with	IRF5 (interacts with) GAL3ST4	false
117236	interacts with	IRF8 (interacts with) HK3	false
117237	interacts with	IRF8 (interacts with) LIPA	false
117238	interacts with	IRF8 (interacts with) NAAA	false
117239	interacts with	IRF8 (interacts with) GM2A	false
117240	interacts with	IRF8 (interacts with) DSE	false
117241	interacts with	IRF8 (interacts with) CSGALNACT2	false
117242	interacts with	JARID2 (interacts with) UGGT1	false
117243	interacts with	JARID2 (interacts with) FAM20B	false
117244	interacts with	JMJD1C (interacts with) FUT11	false
117245	interacts with	JMJD1C (interacts with) CSGALNACT2	false
117246	interacts with	JMJD1C (interacts with) MAN1A2	false
117247	interacts with	JMJD1C (interacts with) NDST2	false
117248	interacts with	JMJD1C (interacts with) MGAT5	false
117249	interacts with	JMJD6 (interacts with) RFNG	false
117250	interacts with	JMJD6 (interacts with) GALK1	false
117251	interacts with	KAT2B (interacts with) MAN1A1	false
117252	interacts with	KAT2B (interacts with) NAAA	false
117253	interacts with	KAT2B (interacts with) FUT7	false
117254	interacts with	KAT2B (interacts with) FUCA1	false
117255	interacts with	KDM1A (interacts with) DDOST	false
117256	interacts with	KDM1A (interacts with) GNB1	false
117257	interacts with	KDM1A (interacts with) POFUT1	false
117258	interacts with	KDM2B (interacts with) MAN2A2	false
117259	interacts with	KDM4C (interacts with) NDST2	false
117260	interacts with	KDM5A (interacts with) ALG10	false
117261	interacts with	KDM5A (interacts with) NEU3	false
117262	interacts with	KDM5A (interacts with) UGGT1	false
117263	interacts with	KDM5B (interacts with) UGGT1	false
117264	interacts with	KDM5B (interacts with) FAM20B	false
117265	interacts with	KDM5B (interacts with) B3GALNT2	false
117266	interacts with	KDM5C (interacts with) MAN2A2	false
117267	interacts with	KDM6B (interacts with) CTNS	false
117268	interacts with	KDM6B (interacts with) POMT1	false
117269	interacts with	KDM6B (interacts with) MAN2A2	false
117270	interacts with	KDM6B (interacts with) HS6ST1	false
117271	interacts with	KLF11 (interacts with) IDS	false
117272	interacts with	KLF4 (interacts with) HAS2	false
117273	interacts with	LEF1 (interacts with) SULF1	false
117274	interacts with	LEF1 (interacts with) XYLT1	false
117275	interacts with	LEF1 (interacts with) HS3ST3A1	false
117276	interacts with	LEF1 (interacts with) ARSB	false
117277	interacts with	LEF1 (interacts with) MFNG	false
117278	interacts with	LEF1 (interacts with) CHST1	false
117279	interacts with	LEF1 (interacts with) ST8SIA2	false
117280	interacts with	LEF1 (interacts with) HAS2	false
117281	interacts with	LEF1 (interacts with) SULF2	false
117282	interacts with	LIN9 (interacts with) PIGC	false
117283	interacts with	LMNB1 (interacts with) GNPNAT1	false
117284	interacts with	LMNB1 (interacts with) CMAS	false
117285	interacts with	LMO2 (interacts with) MGAT1	false
117286	interacts with	LMO2 (interacts with) FUT7	false
117287	interacts with	LMO2 (interacts with) ST3GAL2	false
117288	interacts with	LMO2 (interacts with) NPL	false
117289	interacts with	LMO2 (interacts with) ST8SIA1	false
117290	interacts with	LMO2 (interacts with) HK3	false
117291	interacts with	LYL1 (interacts with) MFNG	false
117292	interacts with	LYL1 (interacts with) FUT7	false
117293	interacts with	LYL1 (interacts with) MAN2B1	false
117294	interacts with	LYL1 (interacts with) MGAT1	false
117295	interacts with	LYL1 (interacts with) RENBP	false
117296	interacts with	LYL1 (interacts with) HK3	false
117297	interacts with	LYL1 (interacts with) ST3GAL2	false
117298	interacts with	LYL1 (interacts with) NAGK	false
117299	interacts with	LYL1 (interacts with) GBGT1	false
117300	interacts with	LYL1 (interacts with) NPL	false
117301	interacts with	LYL1 (interacts with) TPST2	false
117302	interacts with	LYL1 (interacts with) ST8SIA1	false
117303	interacts with	LYL1 (interacts with) MAN1C1	false
117304	interacts with	MAF (interacts with) ST8SIA4	false
117305	interacts with	MAF (interacts with) GFPT2	false
117306	interacts with	MAF (interacts with) ST8SIA1	false
117307	interacts with	MAF (interacts with) MAN1A1	false
117308	interacts with	MAF (interacts with) GM2A	false
117309	interacts with	MAF (interacts with) ST6GALNAC5	false
117310	interacts with	MAF (interacts with) CHST11	false
117311	interacts with	MAF (interacts with) ST3GAL2	false
117312	interacts with	MAF (interacts with) GAL3ST4	false
117313	interacts with	MAF (interacts with) LIPA	false
117314	interacts with	MAF (interacts with) CHSY1	false
117315	interacts with	MAF (interacts with) HK3	false
117316	interacts with	MAFB (interacts with) DSE	false
117317	interacts with	MAFB (interacts with) NPL	false
117318	interacts with	MAFK (interacts with) MAN2A2	false
117319	interacts with	MECP2 (interacts with) IDS	false
117320	interacts with	MECP2 (interacts with) NDST2	false
117321	interacts with	MECP2 (interacts with) MAN2A2	false
117322	interacts with	MECP2 (interacts with) NDST1	false
117323	interacts with	MECP2 (interacts with) NEU3	false
117324	interacts with	MED1 (interacts with) FUT11	false
117325	interacts with	MED1 (interacts with) GANAB	false
117326	interacts with	MED12 (interacts with) MAN2A2	false
117327	interacts with	MEF2A (interacts with) CSGALNACT2	false
117328	interacts with	MEF2A (interacts with) NDST2	false
117329	interacts with	MEF2C (interacts with) ST8SIA1	false
117330	interacts with	MEF2C (interacts with) GALNT10	false
117331	interacts with	MEF2C (interacts with) GCNT4	false
117332	interacts with	MEF2C (interacts with) LIPA	false
117333	interacts with	MEIS1 (interacts with) MGAT3	false
117334	interacts with	MEIS1 (interacts with) CSGALNACT2	false
117335	interacts with	MEIS1 (interacts with) MAN1C1	false
117336	interacts with	MEIS3 (interacts with) ST3GAL2	false
117337	interacts with	MITF (interacts with) GM2A	false
117338	interacts with	MITF (interacts with) GAL3ST4	false
117339	interacts with	MITF (interacts with) CSGALNACT2	false
117340	interacts with	MITF (interacts with) HS3ST3B1	false
117341	interacts with	MITF (interacts with) MAN1C1	false
117342	interacts with	MITF (interacts with) NAAA	false
117343	interacts with	MITF (interacts with) SLC35B4	false
117344	interacts with	MLLT1 (interacts with) SLC35E1	false
117345	interacts with	MRE11A (interacts with) NEU3	false
117346	interacts with	MRE11A (interacts with) GANAB	false
117347	interacts with	MXD3 (interacts with) B3GAT3	false
117348	interacts with	MYBL2 (interacts with) RPN1	false
117349	interacts with	MYBL2 (interacts with) ALG3	false
117350	interacts with	MYBL2 (interacts with) DPM1	false
117351	interacts with	MYBL2 (interacts with) GNPNAT1	false
117352	interacts with	MYBL2 (interacts with) GPI	false
117353	interacts with	MZF1 (interacts with) FKRP	false
117354	interacts with	MZF1 (interacts with) MAN2A2	false
117355	interacts with	NCAPG (interacts with) DPM1	false
117356	interacts with	NCAPG (interacts with) ALG10	false
117357	interacts with	NCAPG (interacts with) GNPNAT1	false
117358	interacts with	NCAPG (interacts with) B3GNT5	false
117359	interacts with	NCAPG (interacts with) GPI	false
117360	interacts with	NFATC1 (interacts with) FUT7	false
117361	interacts with	NFATC1 (interacts with) MAN2B1	false
117362	interacts with	NFATC1 (interacts with) MAN1C1	false
117363	interacts with	NFATC1 (interacts with) MGAT3	false
117364	interacts with	NFIC (interacts with) MGAT5	false
117365	interacts with	NFIC (interacts with) SLC35E1	false
117366	interacts with	NFIC (interacts with) GALNT10	false
117367	interacts with	NFYC (interacts with) ST3GAL3	false
117368	interacts with	NIPBL (interacts with) FKTN	false
117369	interacts with	NIPBL (interacts with) FAM20B	false
117370	interacts with	NKX2-1 (interacts with) ST3GAL5	false
117371	interacts with	NKX2-1 (interacts with) DPM2	false
117372	interacts with	NKX2-1 (interacts with) B3GNT8	false
117373	interacts with	NKX2-1 (interacts with) PMM1	false
117374	interacts with	NOTCH1 (interacts with) MGAT3	false
117375	interacts with	NPAT (interacts with) GANAB	false
117376	interacts with	NPAT (interacts with) FUT11	false
117377	interacts with	NR0B2 (interacts with) B3GNT8	false
117378	interacts with	NR2C2 (interacts with) FKTN	false
117379	interacts with	NR2C2 (interacts with) OGT	false
117380	interacts with	NR2C2 (interacts with) ALG10B	false
117381	interacts with	NR2C2 (interacts with) NDST2	false
117382	interacts with	NR2C2 (interacts with) NDST1	false
117383	interacts with	NR2F1 (interacts with) MAN1C1	false
117384	interacts with	NR2F1 (interacts with) NDST1	false
117385	interacts with	NR2F2 (interacts with) SULT1C4	false
117386	interacts with	NRF1 (interacts with) POMT1	false
117387	interacts with	PHF20 (interacts with) POFUT1	false
117388	interacts with	PHF6 (interacts with) FAM20B	false
117389	interacts with	PHF8 (interacts with) OGT	false
117390	interacts with	PIAS1 (interacts with) MGAT5	false
117391	interacts with	PIAS1 (interacts with) ACER2	false
117392	interacts with	PML (interacts with) FUT7	false
117393	interacts with	PML (interacts with) HK3	false
117394	interacts with	PML (interacts with) GAL3ST4	false
117395	interacts with	POLR2B (interacts with) MAN1A2	false
117396	interacts with	POLR2B (interacts with) STT3B	false
117397	interacts with	POLR2B (interacts with) UGGT1	false
117398	interacts with	POLR3A (interacts with) MGAT5	false
117399	interacts with	POLR3A (interacts with) NEU3	false
117400	interacts with	POLR3A (interacts with) FUT11	false
117401	interacts with	POLR3A (interacts with) HK1	false
117402	interacts with	POLR3A (interacts with) FKTN	false
117403	interacts with	RAC3 (interacts with) GALK1	false
117404	interacts with	RARA (interacts with) XYLT2	false
117405	interacts with	RBBP5 (interacts with) MAN1A2	false
117406	interacts with	RBBP5 (interacts with) FAM20B	false
117407	interacts with	RBBP5 (interacts with) UGGT1	false
117408	interacts with	RBBP5 (interacts with) NEU3	false
117409	interacts with	RBBP5 (interacts with) STT3B	false
117410	interacts with	RBBP5 (interacts with) B3GALNT2	false
117411	interacts with	RBBP5 (interacts with) PIGM	false
117412	interacts with	RBBP5 (interacts with) COG2	false
117413	interacts with	RELA (interacts with) GANAB	false
117414	interacts with	REST (interacts with) FUT11	false
117415	interacts with	RFX2 (interacts with) CHST5	false
117416	interacts with	RFX7 (interacts with) NEU3	false
117417	interacts with	RING1 (interacts with) RFNG	false
117418	interacts with	RING1 (interacts with) MOGS	false
117419	interacts with	RING1 (interacts with) POFUT2	false
117420	interacts with	RING1 (interacts with) PIGQ	false
117421	interacts with	RING1 (interacts with) B3GALT4	false
117422	interacts with	RNF2 (interacts with) FAM20B	false
117423	interacts with	RUNX1 (interacts with) CHST3	false
117424	interacts with	RUNX1 (interacts with) GALNT10	false
117425	interacts with	RUNX1 (interacts with) SLC35E1	false
117426	interacts with	RUNX2 (interacts with) SULF2	false
117427	interacts with	RXRA (interacts with) POMT1	false
117428	interacts with	SETDB1 (interacts with) B4GALT3	false
117429	interacts with	SFMBT1 (interacts with) STT3B	false
117430	interacts with	SIN3A (interacts with) RTF1	false
117431	interacts with	SIN3A (interacts with) NEU3	false
117432	interacts with	SIN3A (interacts with) MAN1A2	false
117433	interacts with	SIRT6 (interacts with) RFNG	false
117434	interacts with	SIX5 (interacts with) PIGQ	false
117435	interacts with	SIX5 (interacts with) COG7	false
117436	interacts with	SMAD1 (interacts with) CHSY1	false
117437	interacts with	SMARCA4 (interacts with) SLC35E1	false
117438	interacts with	SMARCA4 (interacts with) XYLT2	false
117439	interacts with	SMARCC1 (interacts with) RTF1	false
117440	interacts with	SMARCC1 (interacts with) FAM20B	false
117441	interacts with	SMC1A (interacts with) MAN1A2	false
117442	interacts with	SMC1A (interacts with) UGGT1	false
117443	interacts with	SMC1A (interacts with) GANAB	false
117444	interacts with	SMC1A (interacts with) FAM20B	false
117445	interacts with	SMC1A (interacts with) MGAT5	false
117446	interacts with	SMC3 (interacts with) STT3B	false
117447	interacts with	SMC3 (interacts with) FUT11	false
117448	interacts with	SMC3 (interacts with) NEU3	false
117449	interacts with	SMC3 (interacts with) FKTN	false
117450	interacts with	SMC3 (interacts with) FAM20B	false
117451	interacts with	SMC3 (interacts with) MAN1A2	false
117452	interacts with	SMC3 (interacts with) GANAB	false
117453	interacts with	SMC3 (interacts with) UGGT1	false
117454	interacts with	SNAPC1 (interacts with) MGAT2	false
117455	interacts with	SOX2 (interacts with) HS6ST1	false
117456	interacts with	SOX2 (interacts with) ST6GALNAC1	false
117457	interacts with	SP2 (interacts with) PIGO	false
117458	interacts with	SPDEF (interacts with) FUT6	false
117459	interacts with	SPIB (interacts with) FUT7	false
117460	interacts with	SPIB (interacts with) MFNG	false
117461	interacts with	SPIB (interacts with) ST8SIA1	false
117462	interacts with	SPIB (interacts with) GM2A	false
117463	interacts with	SPIB (interacts with) MGAT3	false
117464	interacts with	SRCAP (interacts with) COG7	false
117465	interacts with	SREBF2 (interacts with) ALG12	false
117466	interacts with	SSRP1 (interacts with) GANAB	false
117467	interacts with	SSRP1 (interacts with) STT3A	false
117468	interacts with	SSRP1 (interacts with) POFUT1	false
117469	interacts with	SSRP1 (interacts with) PIGW	false
117470	interacts with	STAT1 (interacts with) GM2A	false
117471	interacts with	STAT1 (interacts with) DSE	false
117472	interacts with	STAT1 (interacts with) CHST11	false
117473	interacts with	STAT1 (interacts with) GAL3ST4	false
117474	interacts with	STAT3 (interacts with) MAN1A2	false
117475	interacts with	STAT4 (interacts with) FUT7	false
117476	interacts with	STAT4 (interacts with) GM2A	false
117477	interacts with	STAT5A (interacts with) MFNG	false
117478	interacts with	STAT5A (interacts with) GM2A	false
117479	interacts with	STAT5A (interacts with) RENBP	false
117480	interacts with	STAT5A (interacts with) LIPA	false
117481	interacts with	STAT5A (interacts with) NPL	false
117482	interacts with	STAT5A (interacts with) MGAT1	false
117483	interacts with	STAT5A (interacts with) ST8SIA1	false
117484	interacts with	STAT5A (interacts with) CHST11	false
117485	interacts with	STAT5A (interacts with) MAN1C1	false
117486	interacts with	STAT5A (interacts with) HS3ST3B1	false
117487	interacts with	STAT5A (interacts with) ST3GAL2	false
117488	interacts with	STAT5A (interacts with) NAGK	false
117489	interacts with	STAT6 (interacts with) IDUA	false
117490	interacts with	SUMO1 (interacts with) PIGC	false
117491	interacts with	TAF1 (interacts with) NEU3	false
117492	interacts with	TAF1 (interacts with) MAN1A2	false
117493	interacts with	TAF1 (interacts with) OGT	false
117494	interacts with	TAF1 (interacts with) NDST2	false
117495	interacts with	TBX21 (interacts with) FUT7	false
117496	interacts with	TBX21 (interacts with) GM2A	false
117497	interacts with	TCF21 (interacts with) MFNG	false
117498	interacts with	TCF21 (interacts with) MAN1C1	false
117499	interacts with	TCF21 (interacts with) ST6GALNAC6	false
117500	interacts with	TCF21 (interacts with) NDST1	false
117501	interacts with	TCF21 (interacts with) UST	false
117502	interacts with	TCF21 (interacts with) MGAT3	false
117503	interacts with	TCF21 (interacts with) LIPA	false
117504	interacts with	TCF7 (interacts with) MFNG	false
117505	interacts with	TCF7L1 (interacts with) HS6ST1	false
117506	interacts with	TEAD1 (interacts with) CSGALNACT2	false
117507	interacts with	TEAD1 (interacts with) FUT11	false
117508	interacts with	TEAD1 (interacts with) CHSY1	false
117509	interacts with	TET2 (interacts with) MAN1A2	false
117510	interacts with	TET2 (interacts with) NDST2	false
117511	interacts with	TFCP2 (interacts with) PIGO	false
117512	interacts with	THAP11 (interacts with) COG8	false
117513	interacts with	TP63 (interacts with) IDS	false
117514	interacts with	TP63 (interacts with) CHST9	false
117515	interacts with	TRIM28 (interacts with) FKRP	false
117516	interacts with	TRIM28 (interacts with) GPI	false
117517	interacts with	TTF2 (interacts with) MAN1A2	false
117518	interacts with	TTF2 (interacts with) PIGW	false
117519	interacts with	TTF2 (interacts with) COG5	false
117520	interacts with	USF1 (interacts with) DPM3	false
117521	interacts with	USF1 (interacts with) B4GALT3	false
117522	interacts with	VDR (interacts with) GALNT10	false
117523	interacts with	VDR (interacts with) CHST3	false
117524	interacts with	WDR5 (interacts with) DPM2	false
117525	interacts with	WDR5 (interacts with) POMT1	false
117526	interacts with	XBP1 (interacts with) ALG5	false
117527	interacts with	XBP1 (interacts with) RPN2	false
117528	interacts with	XRN2 (interacts with) STT3B	false
117529	interacts with	YY1 (interacts with) MGAT2	false
117530	interacts with	ZBTB17 (interacts with) RFNG	false
117531	interacts with	ZBTB17 (interacts with) B3GALT6	false
117532	interacts with	ZBTB17 (interacts with) PIGQ	false
117533	interacts with	ZBTB17 (interacts with) B3GAT3	false
117534	interacts with	ZBTB17 (interacts with) MOGS	false
117535	interacts with	ZBTB17 (interacts with) POMT1	false
117536	interacts with	ZBTB17 (interacts with) SLC35C2	false
117537	interacts with	ZBTB17 (interacts with) FKRP	false
117538	interacts with	ZBTB17 (interacts with) CHST12	false
117539	interacts with	ZBTB17 (interacts with) SGSH	false
117540	interacts with	ZBTB17 (interacts with) MAN2A2	false
117541	interacts with	ZBTB33 (interacts with) FKTN	false
117542	interacts with	ZBTB33 (interacts with) LAMP2	false
