# Supplementary material for: A systems-based framework to computationally describe putative transcription factors and signaling pathways regulating glycan biosynthesis
Source: publisher site journal article supplement (doi:10.3762/bjoc.17.119), 2021-07-22
Supplement: Additional file 2 [file 1860-5397-17-119-S2.cys › CytoscapeSession-2021_03_21-12_01/tables/116985-LUAD/LOCAL_ATTRS-org.cytoscape.model.CyNode-LUAD+default+node.cytable]

CyCSV-Version	1
SUID	name	nodeType	selected
java.lang.Long	java.lang.String	java.lang.String	java.lang.Boolean
		mutable
LUAD default node
105684	ADNP	TF	false
105685	FUT7	Glycogene	false
105686	AFF4	TF	false
105687	MAN1A2	Glycogene	false
105688	STT3B	Glycogene	false
105694	MAN2A1	Glycogene	false
105731	FAM20B	Glycogene	false
105704	ATF2	TF	false
105690	FUT11	Glycogene	false
105696	SLC35F5	Glycogene	false
105691	ACER2	Glycogene	false
105689	NEU3	Glycogene	false
105705	UGGT1	Glycogene	false
105692	COG5	Glycogene	false
105824	COG6	Glycogene	false
105711	ALG10	Glycogene	false
105710	ATF7IP	TF	false
105714	BACH1	TF	false
105715	CSGALNACT2	Glycogene	false
106838	B3GNT2	Glycogene	false
111115	B3GALNT1	Glycogene	false
105728	BRCA1	TF	false
105729	PIGW	Glycogene	false
105998	GANAB	Glycogene	false
107980	PIGX	Glycogene	false
106864	GPI	Glycogene	false
105733	BRD1	TF	false
105734	ALG12	Glycogene	false
105748	MAN2A2	Glycogene	false
110804	SGSH	Glycogene	false
107276	BRD2	TF	false
105874	PIGO	Glycogene	false
107277	BRD3	TF	false
111093	CAMTA2	TF	false
105741	CBX3	TF	false
105799	DPM1	Glycogene	false
105855	GNPNAT1	Glycogene	false
105743	CBX4	TF	false
105762	MOGS	Glycogene	false
105745	CBX7	TF	false
105746	ST6GALNAC6	Glycogene	false
105766	MFNG	Glycogene	false
105840	ST8SIA1	Glycogene	false
106856	FUCA1	Glycogene	false
105811	ST3GAL6	Glycogene	false
105752	CBX8	TF	false
105744	RFNG	Glycogene	false
105753	GALK1	Glycogene	false
105754	B3GAT3	Glycogene	false
105798	SLC35B1	Glycogene	false
105881	GPAA1	Glycogene	false
106848	CDK12	TF	false
105756	CDK8	TF	false
105757	CDK9	TF	false
105758	DPM2	Glycogene	false
105759	PIGQ	Glycogene	false
105760	MAN1B1	Glycogene	false
105769	CHD1	TF	false
105950	SLC35D1	Glycogene	false
105770	CHD2	TF	false
105771	OGT	Glycogene	false
105772	NDST2	Glycogene	false
112217	CHD7	TF	false
105774	CHD8	TF	false
106849	CLOCK	TF	false
105780	CPSF3L	TF	false
105781	B3GALT6	Glycogene	false
107986	SLC35C2	Glycogene	false
108559	GALE	Glycogene	false
105783	POMGNT1	Glycogene	false
105785	CREB1	TF	false
105790	CREBBP	TF	false
106844	SLC35E1	Glycogene	false
106850	DCP1A	TF	false
105795	DEK	TF	false
107282	DNMT3A	TF	false
105908	B3GALNT2	Glycogene	false
105789	B4GALT3	Glycogene	false
105796	E2F1	TF	false
105792	POFUT1	Glycogene	false
107284	E2F3	TF	false
107987	E2F4	TF	false
106892	COG4	Glycogene	false
108575	E2F8	TF	false
105804	EBF1	TF	false
105805	CSGALNACT1	Glycogene	false
105815	ST6GALNAC3	Glycogene	false
105717	CHSY1	Glycogene	false
105979	SULF2	Glycogene	false
108010	CHST1	Glycogene	false
105709	HAS2	Glycogene	false
106854	XYLT1	Glycogene	false
105816	EGR2	TF	false
105779	DSE	Glycogene	false
105883	GM2A	Glycogene	false
105778	GAL3ST4	Glycogene	false
105806	ST3GAL2	Glycogene	false
105860	NPL	Glycogene	false
105750	MGAT3	Glycogene	false
105822	ELF1	TF	false
105823	COG3	Glycogene	false
107278	FUT10	Glycogene	false
105826	ELK3	TF	false
105828	ELL	TF	false
105829	EP400	TF	false
105830	ERCC6	TF	false
107293	HK1	Glycogene	false
105832	ERG	TF	false
105923	NDST1	Glycogene	false
106853	MAN1C1	Glycogene	false
110794	ESRRA	TF	false
105839	ETS1	TF	false
105718	CHST11	Glycogene	false
105884	LIPA	Glycogene	false
105719	GFPT2	Glycogene	false
105893	MGAT5	Glycogene	false
105716	MAN1A1	Glycogene	false
105842	ETV1	TF	false
105941	HAS3	Glycogene	false
105697	GALNT10	Glycogene	false
105846	EZH1	TF	false
108582	EZH2	TF	false
105707	B3GNT5	Glycogene	false
105742	CMAS	Glycogene	false
105847	FANCD2	TF	false
105848	FLI1	TF	false
105859	HK3	Glycogene	false
105841	HS3ST3B1	Glycogene	false
107294	FOSL1	TF	false
107298	FOXK1	TF	false
105853	FOXM1	TF	false
105797	ALG3	Glycogene	false
105856	FOXO1	TF	false
105837	SULT1C4	Glycogene	false
105858	FOXP3	TF	false
105777	MAN2B1	Glycogene	false
105861	GABPA	TF	false
106863	GAPDH	TF	false
109677	GATA3	TF	false
105862	GATA6	TF	false
106858	GCNT4	Glycogene	false
105866	GLYR1	TF	false
105791	COG7	Glycogene	false
105867	ALG1	Glycogene	false
108589	GMEB2	TF	false
105868	GTF2B	TF	false
107992	ALG14	Glycogene	false
105869	CTBS	Glycogene	false
105976	FPGT	Glycogene	false
105871	GTF2I	TF	false
107302	GTF3C2	TF	false
105872	H2AFX	TF	false
105873	HCFC1	TF	false
108593	HDAC6	TF	false
107327	POFUT2	Glycogene	false
105875	HECTD1	TF	false
105876	HES4	TF	false
106867	HIF1A	TF	false
107994	HNF1B	TF	false
116603	GAL3ST1	Glycogene	false
107983	B3GNT8	Glycogene	false
106870	HOXB4	TF	false
105879	HSF1	TF	false
105880	TSTA3	Glycogene	false
105882	IKZF1	TF	false
105834	ST8SIA4	Glycogene	false
105885	INO80	TF	false
105700	RTF1	Glycogene	false
105887	IRF1	TF	false
105765	NAGK	Glycogene	false
106872	IRF3	TF	false
108578	PIGL	Glycogene	false
105896	FKRP	Glycogene	false
105888	IRF4	TF	false
106855	ST6GAL1	Glycogene	false
105889	IRF5	TF	false
107310	NAAA	Glycogene	false
108567	NAGA	Glycogene	false
105890	IRF8	TF	false
107311	JARID2	TF	false
105892	JMJD1C	TF	false
105894	JMJD6	TF	false
107312	KAT2B	TF	false
105901	KDM1A	TF	false
108555	DDOST	Glycogene	false
105902	GNB1	Glycogene	false
107313	KDM2B	TF	false
107997	KDM4C	TF	false
105904	KDM5A	TF	false
105907	KDM5B	TF	false
107314	KDM5C	TF	false
107315	KDM6B	TF	false
114952	CTNS	Glycogene	false
105761	POMT1	Glycogene	false
107996	HS6ST1	Glycogene	false
107316	KLF11	TF	false
105922	IDS	Glycogene	false
107317	KLF4	TF	false
106875	LEF1	TF	false
106883	SULF1	Glycogene	false
108033	HS3ST3A1	Glycogene	false
105843	ARSB	Glycogene	false
105980	ST8SIA2	Glycogene	false
107321	LIN9	TF	false
108558	PIGC	Glycogene	false
109681	LMNB1	TF	false
105909	LMO2	TF	false
105724	MGAT1	Glycogene	false
105911	LYL1	TF	false
105912	RENBP	Glycogene	false
105897	GBGT1	Glycogene	false
106840	TPST2	Glycogene	false
106876	MAF	TF	false
107989	ST6GALNAC5	Glycogene	false
105914	MAFB	TF	false
108006	MAFK	TF	false
105921	MECP2	TF	false
105924	MED1	TF	false
107324	MED12	TF	false
105925	MEF2A	TF	false
105926	MEF2C	TF	false
105928	MEIS1	TF	false
106878	MEIS3	TF	false
105929	MITF	TF	false
105845	SLC35B4	Glycogene	false
108601	MLLT1	TF	false
105931	MRE11A	TF	false
105933	MXD3	TF	false
105935	MYBL2	TF	false
105936	RPN1	Glycogene	false
105942	MZF1	TF	false
108602	NCAPG	TF	false
105944	NFATC1	TF	false
105945	NFIC	TF	false
105946	NFYC	TF	false
105747	ST3GAL3	Glycogene	false
105947	NIPBL	TF	false
105713	FKTN	Glycogene	false
116995	NKX2-1	TF	false
106857	ST3GAL5	Glycogene	false
105735	PMM1	Glycogene	false
108016	NOTCH1	TF	false
105948	NPAT	TF	false
110805	NR0B2	TF	false
105949	NR2C2	TF	false
105727	ALG10B	Glycogene	false
105951	NR2F1	TF	false
108017	NR2F2	TF	false
107333	NRF1	TF	false
105956	PHF20	TF	false
105957	PHF6	TF	false
107334	PHF8	TF	false
105958	PIAS1	TF	false
107336	PML	TF	false
105959	POLR2B	TF	false
105960	POLR3A	TF	false
105964	RAC3	TF	false
106884	RARA	TF	false
109684	XYLT2	Glycogene	false
105967	RBBP5	TF	false
105954	PIGM	Glycogene	false
105973	COG2	Glycogene	false
108024	RELA	TF	false
105970	REST	TF	false
108611	RFX2	TF	false
108612	CHST5	Glycogene	false
105974	RFX7	TF	false
108613	RING1	TF	false
106030	B3GALT4	Glycogene	false
105975	RNF2	TF	false
105978	RUNX1	TF	false
105807	CHST3	Glycogene	false
105981	RUNX2	TF	false
105983	RXRA	TF	false
107339	SETDB1	TF	false
108615	SFMBT1	TF	false
105984	SIN3A	TF	false
106885	SIRT6	TF	false
105986	SIX5	TF	false
107341	SMAD1	TF	false
107343	SMARCA4	TF	false
107344	SMARCC1	TF	false
105989	SMC1A	TF	false
105990	SMC3	TF	false
108618	SNAPC1	TF	false
106868	MGAT2	Glycogene	false
107345	SOX2	TF	false
105920	ST6GALNAC1	Glycogene	false
107346	SP2	TF	false
105993	SPDEF	TF	false
107288	FUT6	Glycogene	false
106888	SPIB	TF	false
105994	SRCAP	TF	false
105995	SREBF2	TF	false
105997	SSRP1	TF	false
106893	STT3A	Glycogene	false
105999	STAT1	TF	false
107347	STAT3	TF	false
106002	STAT4	TF	false
106003	STAT5A	TF	false
107348	STAT6	TF	false
105749	IDUA	Glycogene	false
112231	SUMO1	TF	false
106006	TAF1	TF	false
106889	TBX21	TF	false
108031	TCF21	TF	false
105836	UST	Glycogene	false
106008	TCF7	TF	false
106009	TCF7L1	TF	false
106013	TEAD1	TF	false
106016	TET2	TF	false
107355	TFCP2	TF	false
106890	THAP11	TF	false
106891	COG8	Glycogene	false
106017	TP63	TF	false
105939	CHST9	Glycogene	false
106018	TRIM28	TF	false
106019	TTF2	TF	false
106021	USF1	TF	false
105722	DPM3	Glycogene	false
107356	VDR	TF	false
106024	WDR5	TF	false
108037	XBP1	TF	false
106012	ALG5	Glycogene	false
105854	RPN2	Glycogene	false
106025	XRN2	TF	false
106028	YY1	TF	false
106029	ZBTB17	TF	false
105763	CHST12	Glycogene	false
106031	ZBTB33	TF	false
107350	LAMP2	Glycogene	false
