# Supplementary material for: A systems-based framework to computationally describe putative transcription factors and signaling pathways regulating glycan biosynthesis
Source: publisher site journal article supplement (doi:10.3762/bjoc.17.119), 2021-07-22
Supplement: Additional file 2 [file 1860-5397-17-119-S2.cys › CytoscapeSession-2021_03_21-12_01/tables/117543-LUSC/LOCAL_ATTRS-org.cytoscape.model.CyEdge-LUSC+default+edge.cytable]

CyCSV-Version	1
SUID	interaction	name	selected
java.lang.Long	java.lang.String	java.lang.String	java.lang.Boolean
LUSC default edge
117556	interacts with	ADNP (interacts with) FUT7	false
117557	interacts with	ARID2 (interacts with) RTF1	false
117558	interacts with	BATF (interacts with) FUT7	false
117559	interacts with	BATF (interacts with) FUCA1	false
117560	interacts with	BATF (interacts with) ST3GAL5	false
117561	interacts with	BATF (interacts with) NAAA	false
117562	interacts with	BATF (interacts with) MGAT4A	false
117563	interacts with	BATF (interacts with) ST6GAL1	false
117564	interacts with	BATF3 (interacts with) HK3	false
117565	interacts with	BCL3 (interacts with) HS3ST1	false
117566	interacts with	BRCA1 (interacts with) PIGW	false
117567	interacts with	BRD1 (interacts with) ALG12	false
117568	interacts with	BRD1 (interacts with) B4GALNT4	false
117569	interacts with	BRD4 (interacts with) SLC35E1	false
117570	interacts with	C17orf96 (interacts with) PIGW	false
117571	interacts with	C17orf96 (interacts with) KHK	false
117572	interacts with	C17orf96 (interacts with) MOGS	false
117573	interacts with	CBFB (interacts with) COG8	false
117574	interacts with	CBX8 (interacts with) RFNG	false
117575	interacts with	CBX8 (interacts with) GALK1	false
117576	interacts with	CDK9 (interacts with) DPM2	false
117577	interacts with	CDK9 (interacts with) ST6GALNAC6	false
117578	interacts with	CEBPB (interacts with) ST3GAL2	false
117579	interacts with	CEBPB (interacts with) GFPT2	false
117580	interacts with	CEBPB (interacts with) SULF2	false
117581	interacts with	CHD1 (interacts with) OGT	false
117582	interacts with	CHD1 (interacts with) COG1	false
117583	interacts with	CHD2 (interacts with) OGT	false
117584	interacts with	CIITA (interacts with) FUT7	false
117585	interacts with	CIITA (interacts with) MAN2B1	false
117586	interacts with	CIITA (interacts with) XYLT1	false
117587	interacts with	CPSF3L (interacts with) PIGQ	false
117588	interacts with	CPSF3L (interacts with) TSTA3	false
117589	interacts with	CREB3 (interacts with) PIGO	false
117590	interacts with	CREBBP (interacts with) COG7	false
117591	interacts with	CTNNB1 (interacts with) STT3B	false
117592	interacts with	DLX6 (interacts with) ALG3	false
117593	interacts with	E2F1 (interacts with) KHK	false
117594	interacts with	E2F4 (interacts with) COG4	false
117595	interacts with	E2F4 (interacts with) COG8	false
117596	interacts with	E2F6 (interacts with) GNPDA1	false
117597	interacts with	E2F6 (interacts with) PIGM	false
117598	interacts with	EBNA1BP2 (interacts with) DDOST	false
117599	interacts with	EED (interacts with) ALG8	false
117600	interacts with	ELF1 (interacts with) COG3	false
117601	interacts with	ELF1 (interacts with) COG6	false
117602	interacts with	ERCC6 (interacts with) NDST2	false
117603	interacts with	ETS1 (interacts with) CHST11	false
117604	interacts with	ETS1 (interacts with) MFNG	false
117605	interacts with	ETS1 (interacts with) NDST1	false
117606	interacts with	ETS1 (interacts with) ST3GAL2	false
117607	interacts with	ETS1 (interacts with) MGAT4A	false
117608	interacts with	ETS1 (interacts with) LIPA	false
117609	interacts with	ETS1 (interacts with) GFPT2	false
117610	interacts with	ETS1 (interacts with) ST6GAL1	false
117611	interacts with	ETS1 (interacts with) XYLT1	false
117612	interacts with	ETS1 (interacts with) SULF1	false
117613	interacts with	ETS1 (interacts with) CSGALNACT1	false
117614	interacts with	ETS1 (interacts with) ST3GAL5	false
117615	interacts with	ETS1 (interacts with) CHST15	false
117616	interacts with	ETS1 (interacts with) PAPSS2	false
117617	interacts with	ETS1 (interacts with) FUT7	false
117618	interacts with	ETS1 (interacts with) GALNT10	false
117619	interacts with	ETS1 (interacts with) MGAT1	false
117620	interacts with	ETS1 (interacts with) GBGT1	false
117621	interacts with	ETS1 (interacts with) HK3	false
117622	interacts with	ETS1 (interacts with) HAS1	false
117623	interacts with	ETV1 (interacts with) ARSB	false
117624	interacts with	ETV1 (interacts with) SULF1	false
117625	interacts with	ETV1 (interacts with) DSEL	false
117626	interacts with	ETV4 (interacts with) CHST7	false
117627	interacts with	EZH2 (interacts with) PIGW	false
117628	interacts with	EZH2 (interacts with) KHK	false
117629	interacts with	FANCD2 (interacts with) PIGW	false
117630	interacts with	FLI1 (interacts with) MFNG	false
117631	interacts with	FLI1 (interacts with) ST8SIA4	false
117632	interacts with	FLI1 (interacts with) MGAT4A	false
117633	interacts with	FLI1 (interacts with) ST3GAL2	false
117634	interacts with	FLI1 (interacts with) ST6GAL1	false
117635	interacts with	FLI1 (interacts with) FUT7	false
117636	interacts with	FLI1 (interacts with) MAN1C1	false
117637	interacts with	FLI1 (interacts with) FUCA1	false
117638	interacts with	FLI1 (interacts with) CHST11	false
117639	interacts with	FLI1 (interacts with) CHST15	false
117640	interacts with	FLI1 (interacts with) HK3	false
117641	interacts with	FLI1 (interacts with) ST3GAL5	false
117642	interacts with	FLI1 (interacts with) CSGALNACT2	false
117643	interacts with	FLI1 (interacts with) CSGALNACT1	false
117644	interacts with	FLI1 (interacts with) MGAT1	false
117645	interacts with	FLI1 (interacts with) PAPSS2	false
117646	interacts with	FLI1 (interacts with) NDST2	false
117647	interacts with	FLI1 (interacts with) GNS	false
117648	interacts with	FLI1 (interacts with) SULF1	false
117649	interacts with	FLI1 (interacts with) STS	false
117650	interacts with	FOSL1 (interacts with) HAS3	false
117651	interacts with	FOXA1 (interacts with) ST6GALNAC1	false
117652	interacts with	FOXA1 (interacts with) HS3ST1	false
117653	interacts with	FOXA1 (interacts with) UGT2A1	false
117654	interacts with	FOXA1 (interacts with) GMDS	false
117655	interacts with	FOXA2 (interacts with) SULT1C2	false
117656	interacts with	FOXA2 (interacts with) ST3GAL5	false
117657	interacts with	FOXO1 (interacts with) SULF1	false
117658	interacts with	FOXP3 (interacts with) FUT7	false
117659	interacts with	FOXP3 (interacts with) HK3	false
117660	interacts with	FOXP3 (interacts with) CHST11	false
117661	interacts with	FOXP3 (interacts with) LIPA	false
117662	interacts with	FOXP3 (interacts with) GBGT1	false
117663	interacts with	FOXP3 (interacts with) CSGALNACT2	false
117664	interacts with	FOXP3 (interacts with) ST3GAL2	false
117665	interacts with	FOXP3 (interacts with) FUCA1	false
117666	interacts with	FOXP3 (interacts with) MGAT4A	false
117667	interacts with	FOXP3 (interacts with) ST6GALNAC5	false
117668	interacts with	FOXP3 (interacts with) XYLT1	false
117669	interacts with	FUS (interacts with) B4GALNT4	false
117670	interacts with	GAPDH (interacts with) GPI	false
117671	interacts with	GATA3 (interacts with) CHST11	false
117672	interacts with	GATA3 (interacts with) CHST15	false
117673	interacts with	GATA3 (interacts with) XYLT1	false
117674	interacts with	GATA6 (interacts with) PAPSS2	false
117675	interacts with	GATA6 (interacts with) GFPT2	false
117676	interacts with	GATA6 (interacts with) ST6GAL1	false
117677	interacts with	GATA6 (interacts with) ST3GAL5	false
117678	interacts with	GATA6 (interacts with) ST3GAL2	false
117679	interacts with	GATA6 (interacts with) MGAT4A	false
117680	interacts with	GATA6 (interacts with) SMPD1	false
117681	interacts with	GTF2B (interacts with) ALG14	false
117682	interacts with	GTF3C1 (interacts with) PIGQ	false
117683	interacts with	GTF3C2 (interacts with) KHK	false
117684	interacts with	HBP1 (interacts with) GNPDA1	false
117685	interacts with	HDAC6 (interacts with) OGT	false
117686	interacts with	HDAC6 (interacts with) SULT1A3	false
117687	interacts with	HEXIM1 (interacts with) XYLT2	false
117688	interacts with	HEY1 (interacts with) CHST7	false
117689	interacts with	HEYL (interacts with) EXTL1	false
117690	interacts with	HEYL (interacts with) CHPF	false
117691	interacts with	HINFP (interacts with) DPAGT1	false
117692	interacts with	HINFP (interacts with) STT3A	false
117693	interacts with	HSF1 (interacts with) TSTA3	false
117694	interacts with	HSF1 (interacts with) GPAA1	false
117695	interacts with	IKZF1 (interacts with) MFNG	false
117696	interacts with	IKZF1 (interacts with) ST8SIA4	false
117697	interacts with	IKZF1 (interacts with) MGAT4A	false
117698	interacts with	IKZF1 (interacts with) MAN2B1	false
117699	interacts with	IKZF1 (interacts with) FUT7	false
117700	interacts with	IKZF1 (interacts with) ST6GAL1	false
117701	interacts with	IKZF1 (interacts with) FUCA1	false
117702	interacts with	IKZF1 (interacts with) MAN1C1	false
117703	interacts with	IKZF1 (interacts with) NDST2	false
117704	interacts with	IKZF1 (interacts with) LIPA	false
117705	interacts with	IKZF1 (interacts with) CSGALNACT2	false
117706	interacts with	IKZF1 (interacts with) ST3GAL2	false
117707	interacts with	IKZF1 (interacts with) NAAA	false
117708	interacts with	IKZF1 (interacts with) XYLT1	false
117709	interacts with	INO80 (interacts with) RTF1	false
117710	interacts with	IRF1 (interacts with) HK3	false
117711	interacts with	IRF3 (interacts with) PIGQ	false
117712	interacts with	IRF3 (interacts with) B3GALT6	false
117713	interacts with	IRF3 (interacts with) FKRP	false
117714	interacts with	IRF4 (interacts with) MFNG	false
117715	interacts with	IRF4 (interacts with) FUT7	false
117716	interacts with	IRF4 (interacts with) ST6GAL1	false
117717	interacts with	IRF4 (interacts with) MGAT4A	false
117718	interacts with	IRF8 (interacts with) HK3	false
117719	interacts with	IRF8 (interacts with) ST8SIA4	false
117720	interacts with	IRF8 (interacts with) LIPA	false
117721	interacts with	IRF8 (interacts with) MGAT4A	false
117722	interacts with	IRF8 (interacts with) FUCA1	false
117723	interacts with	IRF8 (interacts with) NAAA	false
117724	interacts with	IRF8 (interacts with) ST6GAL1	false
117725	interacts with	IRF8 (interacts with) HEXB	false
117726	interacts with	JMJD6 (interacts with) RFNG	false
117727	interacts with	JMJD6 (interacts with) COG1	false
117728	interacts with	KDM6B (interacts with) CTNS	false
117729	interacts with	KLF5 (interacts with) A4GALT	false
117730	interacts with	LDB1 (interacts with) PIGQ	false
117731	interacts with	MAFK (interacts with) SULT1A3	false
117732	interacts with	MAX (interacts with) PIGH	false
117733	interacts with	MAX (interacts with) MGAT2	false
117734	interacts with	MBD3 (interacts with) PIGQ	false
117735	interacts with	MECOM (interacts with) ST6GALNAC1	false
117736	interacts with	MED1 (interacts with) PIGW	false
117737	interacts with	MED12 (interacts with) NEU3	false
117738	interacts with	MEF2A (interacts with) CHSY1	false
117739	interacts with	MEF2B (interacts with) ST6GAL1	false
117740	interacts with	MEIS3 (interacts with) ST3GAL2	false
117741	interacts with	MRE11A (interacts with) NEU3	false
117742	interacts with	MYH11 (interacts with) CHST7	false
117743	interacts with	NCOR2 (interacts with) NDST1	false
117744	interacts with	NCOR2 (interacts with) ST3GAL2	false
117745	interacts with	NFIC (interacts with) MGAT5	false
117746	interacts with	NFIC (interacts with) NDST1	false
117747	interacts with	NFYC (interacts with) B3GALT6	false
117748	interacts with	NKX2-1 (interacts with) ST3GAL5	false
117749	interacts with	NKX2-1 (interacts with) SULT1A2	false
117750	interacts with	NKX2-1 (interacts with) LAMP3	false
117751	interacts with	NPAT (interacts with) DPAGT1	false
117752	interacts with	NR1H2 (interacts with) FKRP	false
117753	interacts with	NR1H3 (interacts with) NAAA	false
117754	interacts with	NR2C2 (interacts with) NDST2	false
117755	interacts with	NR2F1 (interacts with) MAN1C1	false
117756	interacts with	NR4A1 (interacts with) HAS1	false
117757	interacts with	NRF1 (interacts with) B4GALNT4	false
117758	interacts with	PCGF1 (interacts with) PIGF	false
117759	interacts with	PML (interacts with) FUT7	false
117760	interacts with	POLR3A (interacts with) NEU3	false
117761	interacts with	POU2F2 (interacts with) MAN1A1	false
117762	interacts with	PRDM1 (interacts with) SULF1	false
117763	interacts with	RAC3 (interacts with) GALK1	false
117764	interacts with	RBBP5 (interacts with) FAM20B	false
117765	interacts with	RBBP5 (interacts with) COG2	false
117766	interacts with	RFX7 (interacts with) PIGB	false
117767	interacts with	RUNX1 (interacts with) SULF1	false
117768	interacts with	RUNX2 (interacts with) CHST15	false
117769	interacts with	RUNX2 (interacts with) SULF2	false
117770	interacts with	RUNX2 (interacts with) MAN1C1	false
117771	interacts with	RUNX2 (interacts with) GALNT10	false
117772	interacts with	SIN3A (interacts with) RTF1	false
117773	interacts with	SMAD4 (interacts with) B4GALT6	false
117774	interacts with	SMC1A (interacts with) UGGT1	false
117775	interacts with	SMC1A (interacts with) RTF1	false
117776	interacts with	SNAPC1 (interacts with) MGAT2	false
117777	interacts with	SOX2 (interacts with) CHST7	false
117778	interacts with	SOX2 (interacts with) GCNT2	false
117779	interacts with	SOX2 (interacts with) UGDH	false
117780	interacts with	SOX2 (interacts with) CHST10	false
117781	interacts with	SOX2 (interacts with) PIGW	false
117782	interacts with	SOX2 (interacts with) B4GALT4	false
117783	interacts with	SOX2 (interacts with) UGT1A6	false
117784	interacts with	SOX2 (interacts with) UST	false
117785	interacts with	SOX2 (interacts with) FAM20B	false
117786	interacts with	SOX2 (interacts with) KHK	false
117787	interacts with	SOX2 (interacts with) GPI	false
117788	interacts with	SOX2 (interacts with) ST3GAL3	false
117789	interacts with	SOX2 (interacts with) ST6GAL2	false
117790	interacts with	SOX2 (interacts with) NPL	false
117791	interacts with	SRC (interacts with) SLC35C2	false
117792	interacts with	SRCAP (interacts with) COG7	false
117793	interacts with	SREBF2 (interacts with) ALG12	false
117794	interacts with	SSRP1 (interacts with) GANAB	false
117795	interacts with	STAT1 (interacts with) LIPA	false
117796	interacts with	STAT4 (interacts with) FUT7	false
117797	interacts with	STAT4 (interacts with) MFNG	false
117798	interacts with	STAT4 (interacts with) FUCA1	false
117799	interacts with	STAT4 (interacts with) MGAT4A	false
117800	interacts with	STAT4 (interacts with) MGAT1	false
117801	interacts with	STAT4 (interacts with) NDST2	false
117802	interacts with	STAT4 (interacts with) ST3GAL5	false
117803	interacts with	SUMO2 (interacts with) SLC35B1	false
117804	interacts with	SUMO2 (interacts with) PIGY	false
117805	interacts with	TAF1 (interacts with) OGT	false
117806	interacts with	TCF12 (interacts with) RTF1	false
117807	interacts with	TCF12 (interacts with) CHSY1	false
117808	interacts with	TCF12 (interacts with) MGAT5	false
117809	interacts with	TCF12 (interacts with) XYLT1	false
117810	interacts with	TCF12 (interacts with) DSEL	false
117811	interacts with	TCF21 (interacts with) MFNG	false
117812	interacts with	TCF21 (interacts with) MAN1C1	false
117813	interacts with	TCF21 (interacts with) MGAT1	false
117814	interacts with	TCF21 (interacts with) ST3GAL5	false
117815	interacts with	TCF21 (interacts with) SMPD1	false
117816	interacts with	TCF21 (interacts with) STS	false
117817	interacts with	TCF21 (interacts with) GBGT1	false
117818	interacts with	TCF7 (interacts with) CHST11	false
117819	interacts with	TCF7 (interacts with) ST3GAL2	false
117820	interacts with	TCF7 (interacts with) XYLT1	false
117821	interacts with	TP63 (interacts with) UGT1A9	false
117822	interacts with	TP63 (interacts with) UGT1A7	false
117823	interacts with	TP63 (interacts with) CHST7	false
117824	interacts with	TP63 (interacts with) UGT1A1	false
117825	interacts with	VDR (interacts with) SULF2	false
117826	interacts with	VDR (interacts with) GALNT10	false
117827	interacts with	VDR (interacts with) CHST11	false
117828	interacts with	VDR (interacts with) DSE	false
117829	interacts with	VDR (interacts with) NDST1	false
117830	interacts with	VDR (interacts with) SLC35D1	false
117831	interacts with	VDR (interacts with) ST3GAL2	false
117832	interacts with	WDR5 (interacts with) DPM2	false
117833	interacts with	WDR5 (interacts with) POMT1	false
117834	interacts with	WDR5 (interacts with) MAN1B1	false
117835	interacts with	WDR5 (interacts with) PIGW	false
117836	interacts with	WDR5 (interacts with) B4GALNT1	false
117837	interacts with	XBP1 (interacts with) ST6GAL1	false
117838	interacts with	YY1 (interacts with) MGAT2	false
117839	interacts with	YY1 (interacts with) PIGH	false
117840	interacts with	ZBTB17 (interacts with) B3GALT6	false
117841	interacts with	ZBTB17 (interacts with) PIGQ	false
117842	interacts with	ZBTB17 (interacts with) IDUA	false
117843	interacts with	ZBTB17 (interacts with) FKRP	false
117844	interacts with	ZBTB17 (interacts with) GMPPA	false
117845	interacts with	ZBTB33 (interacts with) FKTN	false
117846	interacts with	ZBTB33 (interacts with) UGDH	false
