# Supplementary material for: A systems-based framework to computationally describe putative transcription factors and signaling pathways regulating glycan biosynthesis
Source: publisher site journal article supplement (doi:10.3762/bjoc.17.119), 2021-07-22
Supplement: Additional file 2 [file 1860-5397-17-119-S2.cys › CytoscapeSession-2021_03_21-12_01/tables/117847-MESO/LOCAL_ATTRS-org.cytoscape.model.CyNode-MESO+default+node.cytable]

CyCSV-Version	1
SUID	name	nodeType	selected
java.lang.Long	java.lang.String	java.lang.String	java.lang.Boolean
		mutable
MESO default node
105686	AFF4	TF	false
105687	MAN1A2	Glycogene	false
105688	STT3B	Glycogene	false
105689	NEU3	Glycogene	false
105694	MAN2A1	Glycogene	false
105715	CSGALNACT2	Glycogene	false
106836	AHR	TF	false
105985	UGCG	Glycogene	false
105701	ATF1	TF	false
105716	MAN1A1	Glycogene	false
105704	ATF2	TF	false
105690	FUT11	Glycogene	false
105696	SLC35F5	Glycogene	false
105691	ACER2	Glycogene	false
105998	GANAB	Glycogene	false
105695	SLC35A3	Glycogene	false
105950	SLC35D1	Glycogene	false
111091	ATF5	TF	false
105724	MGAT1	Glycogene	false
105880	TSTA3	Glycogene	false
105783	POMGNT1	Glycogene	false
107975	BARX2	TF	false
108584	UGP2	Glycogene	false
110806	GALK2	Glycogene	false
105721	BATF	TF	false
105765	NAGK	Glycogene	false
105723	BATF3	TF	false
105718	CHST11	Glycogene	false
106840	TPST2	Glycogene	false
105717	CHSY1	Glycogene	false
105896	FKRP	Glycogene	false
105725	BCAT1	TF	false
108552	GCNT1	Glycogene	false
106843	BRD4	TF	false
105748	MAN2A2	Glycogene	false
105902	GNB1	Glycogene	false
110789	BTAF1	TF	false
105711	ALG10	Glycogene	false
105736	C17orf49	TF	false
106845	CBFA2T3	TF	false
106846	LFNG	Glycogene	false
105841	HS3ST3B1	Glycogene	false
105743	CBX4	TF	false
105776	LAMP3	Glycogene	false
105773	CHD4	TF	false
105774	CHD8	TF	false
105775	CIITA	TF	false
105834	ST8SIA4	Glycogene	false
106849	CLOCK	TF	false
105786	CREB3	TF	false
114944	AGA	Glycogene	false
105795	DEK	TF	false
105707	B3GNT5	Glycogene	false
108573	E2F2	TF	false
105762	MOGS	Glycogene	false
105806	ST3GAL2	Glycogene	false
107284	E2F3	TF	false
105792	POFUT1	Glycogene	false
108575	E2F8	TF	false
105825	ELF2	TF	false
105823	COG3	Glycogene	false
105727	ALG10B	Glycogene	false
105826	ELK3	TF	false
105832	ERG	TF	false
105833	CHSY3	Glycogene	false
106854	XYLT1	Glycogene	false
105836	UST	Glycogene	false
105851	GLCE	Glycogene	false
105839	ETS1	TF	false
105842	ETV1	TF	false
106027	GALNT5	Glycogene	false
107298	FOXK1	TF	false
105923	NDST1	Glycogene	false
106862	FUS	TF	false
105784	B4GALNT4	Glycogene	false
105861	GABPA	TF	false
106863	GAPDH	TF	false
106864	GPI	Glycogene	false
106865	GPS2	TF	false
105753	GALK1	Glycogene	false
105871	GTF2I	TF	false
112221	HEXIM1	TF	false
109684	XYLT2	Glycogene	false
106867	HIF1A	TF	false
108027	PIGA	Glycogene	false
117857	HJURP	TF	false
108596	HOXA1	TF	false
105845	SLC35B4	Glycogene	false
105882	IKZF1	TF	false
105766	MFNG	Glycogene	false
105885	INO80	TF	false
105700	RTF1	Glycogene	false
106871	IRF2	TF	false
110804	SGSH	Glycogene	false
105890	IRF8	TF	false
105859	HK3	Glycogene	false
106860	MGAT4A	Glycogene	false
107310	NAAA	Glycogene	false
108567	NAGA	Glycogene	false
108561	GALNT6	Glycogene	false
105892	JMJD1C	TF	false
105904	KDM5A	TF	false
106875	LEF1	TF	false
105909	LMO2	TF	false
105911	LYL1	TF	false
105685	FUT7	Glycogene	false
105912	RENBP	Glycogene	false
105914	MAFB	TF	false
105860	NPL	Glycogene	false
105772	NDST2	Glycogene	false
105916	MAZ	TF	false
105759	PIGQ	Glycogene	false
107323	MBD3	TF	false
105758	DPM2	Glycogene	false
108599	MBD4	TF	false
105732	SLC35E3	Glycogene	false
105924	MED1	TF	false
107325	MEF2D	TF	false
105789	B4GALT3	Glycogene	false
106878	MEIS3	TF	false
105931	MRE11A	TF	false
105933	MXD3	TF	false
105934	MYBL1	TF	false
106844	SLC35E1	Glycogene	false
106014	GALNT1	Glycogene	false
105935	MYBL2	TF	false
107990	B4GALNT1	Glycogene	false
117858	NCAPG2	TF	false
105943	NFAT5	TF	false
105692	COG5	Glycogene	false
113229	NFE2	TF	false
117555	SULT1A2	Glycogene	false
105945	NFIC	TF	false
107283	GAL3ST2	Glycogene	false
105946	NFYC	TF	false
105747	ST3GAL3	Glycogene	false
105947	NIPBL	TF	false
110807	NR1H3	TF	false
105949	NR2C2	TF	false
105713	FKTN	Glycogene	false
117859	NR2F6	TF	false
105956	PHF20	TF	false
105905	GNS	Glycogene	false
108021	PRDM4	TF	false
105893	MGAT5	Glycogene	false
105964	RAC3	TF	false
105974	RFX7	TF	false
105978	RUNX1	TF	false
105981	RUNX2	TF	false
106861	CHST15	Glycogene	false
105809	TPST1	Glycogene	false
105982	RUNX3	TF	false
106885	SIRT6	TF	false
108618	SNAPC1	TF	false
106868	MGAT2	Glycogene	false
108619	SOX11	TF	false
113217	NEU4	Glycogene	false
106001	STAT2	TF	false
108623	TAF7	TF	false
108586	SLC35A4	Glycogene	false
106007	TCF12	TF	false
106011	TDRD3	TF	false
106012	ALG5	Glycogene	false
106013	TEAD1	TF	false
109690	TEAD2	TF	false
105802	FUT1	Glycogene	false
108590	GAL3ST3	Glycogene	false
110815	TOP2B	TF	false
106018	TRIM28	TF	false
108628	TRRAP	TF	false
106025	XRN2	TF	false
106026	YAP1	TF	false
105844	EXTL2	Glycogene	false
