# Supplementary material for: A systems-based framework to computationally describe putative transcription factors and signaling pathways regulating glycan biosynthesis
Source: publisher site journal article supplement (doi:10.3762/bjoc.17.119), 2021-07-22
Supplement: Additional file 2 [file 1860-5397-17-119-S2.cys › CytoscapeSession-2021_03_21-12_01/tables/118033-OV/LOCAL_ATTRS-org.cytoscape.model.CyNode-OV+default+node.cytable]

CyCSV-Version	1
SUID	name	nodeType	selected
java.lang.Long	java.lang.String	java.lang.String	java.lang.Boolean
		mutable
OV default node
105686	AFF4	TF	false
105694	MAN2A1	Glycogene	false
105693	AR	TF	false
108034	B3GALT5	Glycogene	false
105699	ARID2	TF	false
105700	RTF1	Glycogene	false
105732	SLC35E3	Glycogene	false
107273	ASH2L	TF	false
107278	FUT10	Glycogene	false
105701	ATF1	TF	false
105704	ATF2	TF	false
105689	NEU3	Glycogene	false
105723	BATF3	TF	false
105859	HK3	Glycogene	false
110788	BCOR	TF	false
105748	MAN2A2	Glycogene	false
107277	BRD3	TF	false
105761	POMT1	Glycogene	false
106843	BRD4	TF	false
106844	SLC35E1	Glycogene	false
105739	CBFB	TF	false
106859	GALNT7	Glycogene	false
106892	COG4	Glycogene	false
105756	CDK8	TF	false
105845	SLC35B4	Glycogene	false
105757	CDK9	TF	false
105758	DPM2	Glycogene	false
105760	MAN1B1	Glycogene	false
105746	ST6GALNAC6	Glycogene	false
109671	ALG2	Glycogene	false
105764	CEBPA	TF	false
105860	NPL	Glycogene	false
105884	LIPA	Glycogene	false
105774	CHD8	TF	false
108023	POMT2	Glycogene	false
105775	CIITA	TF	false
105685	FUT7	Glycogene	false
105778	GAL3ST4	Glycogene	false
105780	CPSF3L	TF	false
105781	B3GALT6	Glycogene	false
105902	GNB1	Glycogene	false
105786	CREB3	TF	false
105874	PIGO	Glycogene	false
105794	CTNNB1	TF	false
105688	STT3B	Glycogene	false
107282	DNMT3A	TF	false
105908	B3GALNT2	Glycogene	false
105762	MOGS	Glycogene	false
105806	ST3GAL2	Glycogene	false
107987	E2F4	TF	false
106891	COG8	Glycogene	false
105801	E2F6	TF	false
105844	EXTL2	Glycogene	false
105803	E2F7	TF	false
105816	EGR2	TF	false
105833	CHSY3	Glycogene	false
105708	HAS1	Glycogene	false
105822	ELF1	TF	false
105823	COG3	Glycogene	false
105824	COG6	Glycogene	false
105829	EP400	TF	false
105830	ERCC6	TF	false
105772	NDST2	Glycogene	false
110794	ESRRA	TF	false
105754	B3GAT3	Glycogene	false
106839	ST6GALNAC4	Glycogene	false
107287	FUT2	Glycogene	false
105842	ETV1	TF	false
105843	ARSB	Glycogene	false
106883	SULF1	Glycogene	false
106027	GALNT5	Glycogene	false
105715	CSGALNACT2	Glycogene	false
106854	XYLT1	Glycogene	false
105979	SULF2	Glycogene	false
105720	ST6GAL2	Glycogene	false
105779	DSE	Glycogene	false
105716	MAN1A1	Glycogene	false
105719	GFPT2	Glycogene	false
105840	ST8SIA1	Glycogene	false
106861	CHST15	Glycogene	false
105718	CHST11	Glycogene	false
105709	HAS2	Glycogene	false
108582	EZH2	TF	false
107295	FOSL2	TF	false
105697	GALNT10	Glycogene	false
107298	FOXK1	TF	false
105923	NDST1	Glycogene	false
105750	MGAT3	Glycogene	false
105856	FOXO1	TF	false
113218	FOXP1	TF	false
105858	FOXP3	TF	false
105834	ST8SIA4	Glycogene	false
105912	RENBP	Glycogene	false
109677	GATA3	TF	false
105863	GATAD1	TF	false
105692	COG5	Glycogene	false
105866	GLYR1	TF	false
105791	COG7	Glycogene	false
105867	ALG1	Glycogene	false
105868	GTF2B	TF	false
107992	ALG14	Glycogene	false
105869	CTBS	Glycogene	false
105976	FPGT	Glycogene	false
105871	GTF2I	TF	false
105705	UGGT1	Glycogene	false
105872	H2AFX	TF	false
105873	HCFC1	TF	false
107304	HDAC3	TF	false
107305	GNPDA1	Glycogene	false
105877	HINFP	TF	false
105878	DPAGT1	Glycogene	false
106893	STT3A	Glycogene	false
105879	HSF1	TF	false
105880	TSTA3	Glycogene	false
105881	GPAA1	Glycogene	false
105882	IKZF1	TF	false
105766	MFNG	Glycogene	false
105883	GM2A	Glycogene	false
105765	NAGK	Glycogene	false
108567	NAGA	Glycogene	false
105897	GBGT1	Glycogene	false
105885	INO80	TF	false
105887	IRF1	TF	false
105776	LAMP3	Glycogene	false
106000	HPSE	Glycogene	false
106871	IRF2	TF	false
105890	IRF8	TF	false
107311	JARID2	TF	false
105954	PIGM	Glycogene	false
105898	JUNB	TF	false
113214	PPBP	Glycogene	false
105901	KDM1A	TF	false
108555	DDOST	Glycogene	false
107313	KDM2B	TF	false
105903	KDM3A	TF	false
106882	GFPT1	Glycogene	false
107997	KDM4C	TF	false
105691	ACER2	Glycogene	false
105904	KDM5A	TF	false
105905	GNS	Glycogene	false
105907	KDM5B	TF	false
107306	GALNT2	Glycogene	false
105784	B4GALNT4	Glycogene	false
107315	KDM6B	TF	false
114952	CTNS	Glycogene	false
105909	LMO2	TF	false
105910	HS3ST1	Glycogene	false
105911	LYL1	TF	false
106840	TPST2	Glycogene	false
106876	MAF	TF	false
105805	CSGALNACT1	Glycogene	false
105914	MAFB	TF	false
105915	MAX	TF	false
105852	PIGH	Glycogene	false
105919	MECOM	TF	false
105921	MECP2	TF	false
105922	IDS	Glycogene	false
105925	MEF2A	TF	false
105717	CHSY1	Glycogene	false
106878	MEIS3	TF	false
107328	PAPSS2	Glycogene	false
105935	MYBL2	TF	false
105854	RPN2	Glycogene	false
107326	NCOR2	TF	false
105944	NFATC1	TF	false
107329	NFYA	TF	false
105946	NFYC	TF	false
105747	ST3GAL3	Glycogene	false
108016	NOTCH1	TF	false
105948	NPAT	TF	false
105949	NR2C2	TF	false
105771	OGT	Glycogene	false
105731	FAM20B	Glycogene	false
105951	NR2F1	TF	false
108032	B3GNT9	Glycogene	false
106857	ST3GAL5	Glycogene	false
108605	GALNT9	Glycogene	false
105953	PBX1	TF	false
105956	PHF20	TF	false
105792	POFUT1	Glycogene	false
105960	POLR3A	TF	false
107293	HK1	Glycogene	false
118043	POU2F1	TF	false
106880	POU2F2	TF	false
106881	PPARA	TF	false
105734	ALG12	Glycogene	false
105962	PRDM1	TF	false
105841	HS3ST3B1	Glycogene	false
108021	PRDM4	TF	false
105965	RB1	TF	false
105967	RBBP5	TF	false
105973	COG2	Glycogene	false
105969	RCOR1	TF	false
105713	FKTN	Glycogene	false
105971	RFX1	TF	false
105974	RFX7	TF	false
108020	PIGB	Glycogene	false
105975	RNF2	TF	false
105702	SLC35A5	Glycogene	false
108558	PIGC	Glycogene	false
105978	RUNX1	TF	false
107274	B4GALT1	Glycogene	false
105768	A4GALT	Glycogene	false
105981	RUNX2	TF	false
108025	SCML2	TF	false
105815	ST6GALNAC3	Glycogene	false
107339	SETDB1	TF	false
105984	SIN3A	TF	false
107340	MPI	Glycogene	false
107343	SMARCA4	TF	false
108617	SMARCB1	TF	false
111112	SLC35E4	Glycogene	false
107344	SMARCC1	TF	false
107346	SP2	TF	false
109684	XYLT2	Glycogene	false
108028	SRC	TF	false
105994	SRCAP	TF	false
105999	STAT1	TF	false
106001	STAT2	TF	false
112231	SUMO1	TF	false
105799	DPM1	Glycogene	false
106004	SUMO2	TF	false
105798	SLC35B1	Glycogene	false
105753	GALK1	Glycogene	false
106005	COG1	Glycogene	false
108008	DAD1	Glycogene	false
118044	SUZ12	TF	false
106006	TAF1	TF	false
106007	TCF12	TF	false
106009	TCF7L1	TF	false
108583	CHPF	Glycogene	false
118045	TET3	TF	false
107354	TFAP2C	TF	false
106890	THAP11	TF	false
106019	TTF2	TF	false
105687	MAN1A2	Glycogene	false
106021	USF1	TF	false
105789	B4GALT3	Glycogene	false
106022	USF2	TF	false
106864	GPI	Glycogene	false
107356	VDR	TF	false
106024	WDR5	TF	false
106026	YAP1	TF	false
108554	ALG9	Glycogene	false
106029	ZBTB17	TF	false
106031	ZBTB33	TF	false
107350	LAMP2	Glycogene	false
