# Supplementary material for: A systems-based framework to computationally describe putative transcription factors and signaling pathways regulating glycan biosynthesis
Source: publisher site journal article supplement (doi:10.3762/bjoc.17.119), 2021-07-22
Supplement: Additional file 2 [file 1860-5397-17-119-S2.cys › CytoscapeSession-2021_03_21-12_01/tables/118318-PAAD/LOCAL_ATTRS-org.cytoscape.model.CyEdge-PAAD+default+edge.cytable]

CyCSV-Version	1
SUID	interaction	name	selected
java.lang.Long	java.lang.String	java.lang.String	java.lang.Boolean
PAAD default edge
118341	interacts with	AFF4 (interacts with) MAN1A2	false
118342	interacts with	AFF4 (interacts with) STT3B	false
118343	interacts with	AFF4 (interacts with) NEU3	false
118344	interacts with	AFF4 (interacts with) FUT11	false
118345	interacts with	AFF4 (interacts with) MAN2A1	false
118346	interacts with	AFF4 (interacts with) COG5	false
118347	interacts with	AFF4 (interacts with) UGCG	false
118348	interacts with	AFF4 (interacts with) GALNT10	false
118349	interacts with	AFF4 (interacts with) UGGT1	false
118350	interacts with	AFF4 (interacts with) SLC35A3	false
118351	interacts with	AFF4 (interacts with) SLC35D1	false
118352	interacts with	AFF4 (interacts with) ALG10	false
118353	interacts with	AFF4 (interacts with) SLC35E1	false
118354	interacts with	AFF4 (interacts with) SLC35A5	false
118355	interacts with	AFF4 (interacts with) GFPT1	false
118356	interacts with	AFF4 (interacts with) ALG10B	false
118357	interacts with	AFF4 (interacts with) SLC35F5	false
118358	interacts with	AFF4 (interacts with) COG6	false
118359	interacts with	AFF4 (interacts with) HS2ST1	false
118360	interacts with	AFF4 (interacts with) GANAB	false
118361	interacts with	AFF4 (interacts with) CHSY1	false
118362	interacts with	AFF4 (interacts with) PIGK	false
118363	interacts with	AFF4 (interacts with) CSGALNACT2	false
118364	interacts with	AFF4 (interacts with) LAMP2	false
118365	interacts with	AFF4 (interacts with) UGDH	false
118366	interacts with	AFF4 (interacts with) SLC35E3	false
118367	interacts with	AFF4 (interacts with) MGAT2	false
118368	interacts with	AFF4 (interacts with) GLCE	false
118369	interacts with	AFF4 (interacts with) MAN1A1	false
118370	interacts with	AFF4 (interacts with) UGP2	false
118371	interacts with	AHR (interacts with) UGCG	false
118372	interacts with	AHR (interacts with) GALNT5	false
118373	interacts with	AHR (interacts with) GLCE	false
118374	interacts with	ARID2 (interacts with) RTF1	false
118375	interacts with	ATF1 (interacts with) STT3B	false
118376	interacts with	ATF1 (interacts with) ALG10	false
118377	interacts with	ATF1 (interacts with) ALG10B	false
118378	interacts with	ATF1 (interacts with) SLC35E3	false
118379	interacts with	ATF1 (interacts with) HS2ST1	false
118380	interacts with	ATF1 (interacts with) SLC35F5	false
118381	interacts with	ATF1 (interacts with) MAN2A1	false
118382	interacts with	ATF1 (interacts with) PIGK	false
118383	interacts with	ATF1 (interacts with) GLCE	false
118384	interacts with	ATF1 (interacts with) MAN1A1	false
118385	interacts with	ATF1 (interacts with) CSGALNACT2	false
118386	interacts with	ATF1 (interacts with) UGCG	false
118387	interacts with	ATF1 (interacts with) FKTN	false
118388	interacts with	ATF1 (interacts with) GNS	false
118389	interacts with	ATF1 (interacts with) MAN1A2	false
118390	interacts with	ATF1 (interacts with) GALC	false
118391	interacts with	ATF1 (interacts with) B4GALT6	false
118392	interacts with	ATF1 (interacts with) PIGN	false
118393	interacts with	ATF1 (interacts with) GALNT1	false
118394	interacts with	ATF1 (interacts with) ST8SIA4	false
118395	interacts with	ATF2 (interacts with) MAN1A2	false
118396	interacts with	ATF2 (interacts with) MAN2A1	false
118397	interacts with	ATF2 (interacts with) FUT11	false
118398	interacts with	ATF2 (interacts with) SLC35F5	false
118399	interacts with	ATF2 (interacts with) NEU3	false
118400	interacts with	ATF2 (interacts with) UGGT1	false
118401	interacts with	ATF2 (interacts with) FUT10	false
118402	interacts with	ATF2 (interacts with) STT3B	false
118403	interacts with	ATF2 (interacts with) COG5	false
118404	interacts with	ATF2 (interacts with) GANAB	false
118405	interacts with	ATF2 (interacts with) RTF1	false
118406	interacts with	ATF2 (interacts with) COG6	false
118407	interacts with	ATF2 (interacts with) FAM20B	false
118408	interacts with	ATF2 (interacts with) UGDH	false
118409	interacts with	ATF2 (interacts with) FKTN	false
118410	interacts with	ATF2 (interacts with) SLC35A5	false
118411	interacts with	ATF2 (interacts with) SLC35E1	false
118412	interacts with	ATF2 (interacts with) STT3A	false
118413	interacts with	ATF2 (interacts with) GLCE	false
118414	interacts with	ATF2 (interacts with) UGP2	false
118415	interacts with	ATF4 (interacts with) DPM2	false
118416	interacts with	ATRX (interacts with) FKTN	false
118417	interacts with	ATRX (interacts with) PIGK	false
118418	interacts with	BATF (interacts with) NANS	false
118419	interacts with	BATF (interacts with) TSTA3	false
118420	interacts with	BATF (interacts with) SLC35C2	false
118421	interacts with	BATF (interacts with) B3GNT3	false
118422	interacts with	BATF (interacts with) MGAT4B	false
118423	interacts with	BATF (interacts with) LFNG	false
118424	interacts with	BATF (interacts with) HK1	false
118425	interacts with	BATF3 (interacts with) MGAT1	false
118426	interacts with	BATF3 (interacts with) ST8SIA4	false
118427	interacts with	BCL3 (interacts with) MOGS	false
118428	interacts with	BCL3 (interacts with) GALE	false
118429	interacts with	BCL6 (interacts with) OGT	false
118430	interacts with	BCL6 (interacts with) UGCG	false
118431	interacts with	BCL6 (interacts with) PIGA	false
118432	interacts with	BHLHE40 (interacts with) B3GNT3	false
118433	interacts with	BHLHE40 (interacts with) C1GALT1	false
118434	interacts with	BMI1 (interacts with) ALG10B	false
118435	interacts with	BMI1 (interacts with) FAM20B	false
118436	interacts with	BMI1 (interacts with) MAN1A2	false
118437	interacts with	BMI1 (interacts with) CSGALNACT2	false
118438	interacts with	BMI1 (interacts with) STT3B	false
118439	interacts with	BMI1 (interacts with) COG5	false
118440	interacts with	BMI1 (interacts with) PIGK	false
118441	interacts with	BMI1 (interacts with) GFPT1	false
118442	interacts with	BMI1 (interacts with) GLCE	false
118443	interacts with	BMI1 (interacts with) PIGM	false
118444	interacts with	BMI1 (interacts with) GALC	false
118445	interacts with	BMI1 (interacts with) B4GALT6	false
118446	interacts with	BMI1 (interacts with) SLC35A5	false
118447	interacts with	BMI1 (interacts with) SLC35D1	false
118448	interacts with	BRD1 (interacts with) ALG12	false
118449	interacts with	BRD1 (interacts with) COG3	false
118450	interacts with	BRD1 (interacts with) POMT1	false
118451	interacts with	BRD1 (interacts with) SGSH	false
118452	interacts with	BRD1 (interacts with) ALG13	false
118453	interacts with	BRD3 (interacts with) RTF1	false
118454	interacts with	BRD3 (interacts with) SLC35E3	false
118455	interacts with	BRD3 (interacts with) UGCG	false
118456	interacts with	BRD3 (interacts with) SLC35A4	false
118457	interacts with	BRD7 (interacts with) DPM1	false
118458	interacts with	BRD7 (interacts with) C1GALT1C1	false
118459	interacts with	BRD7 (interacts with) STT3A	false
118460	interacts with	BTAF1 (interacts with) PIGL	false
118461	interacts with	C17orf49 (interacts with) B3GAT3	false
118462	interacts with	C17orf49 (interacts with) MAN2B1	false
118463	interacts with	CAMTA2 (interacts with) SGSH	false
118464	interacts with	CAMTA2 (interacts with) MFNG	false
118465	interacts with	CAMTA2 (interacts with) ST3GAL2	false
118466	interacts with	CBFB (interacts with) CTBS	false
118467	interacts with	CBFB (interacts with) FKTN	false
118468	interacts with	CBFB (interacts with) SLC17A5	false
118469	interacts with	CBFB (interacts with) GALC	false
118470	interacts with	CBFB (interacts with) GNPNAT1	false
118471	interacts with	CBFB (interacts with) PIGA	false
118472	interacts with	CBFB (interacts with) SLC35F5	false
118473	interacts with	CBFB (interacts with) SLC35A1	false
118474	interacts with	CBFB (interacts with) FPGT	false
118475	interacts with	CBX7 (interacts with) MAN1C1	false
118476	interacts with	CBX7 (interacts with) MFNG	false
118477	interacts with	CBX7 (interacts with) ST6GAL1	false
118478	interacts with	CBX7 (interacts with) HS6ST3	false
118479	interacts with	CBX7 (interacts with) CHST8	false
118480	interacts with	CBX7 (interacts with) CHST10	false
118481	interacts with	CBX7 (interacts with) ST6GALNAC3	false
118482	interacts with	CDK12 (interacts with) PIGO	false
118483	interacts with	CDK12 (interacts with) GANAB	false
118484	interacts with	CDK12 (interacts with) COG8	false
118485	interacts with	CDK7 (interacts with) B3GNT3	false
118486	interacts with	CDK7 (interacts with) ALG3	false
118487	interacts with	CDK7 (interacts with) MGAT4B	false
118488	interacts with	CDK7 (interacts with) NANS	false
118489	interacts with	CDK7 (interacts with) B4GALT3	false
118490	interacts with	CDK7 (interacts with) DAD1	false
118491	interacts with	CDK7 (interacts with) SLC35A2	false
118492	interacts with	CDK7 (interacts with) ALG8	false
118493	interacts with	CDK7 (interacts with) SLC35B1	false
118494	interacts with	CDK8 (interacts with) STT3B	false
118495	interacts with	CDK8 (interacts with) NEU3	false
118496	interacts with	CDK8 (interacts with) COG3	false
118497	interacts with	CDK8 (interacts with) SLC35A3	false
118498	interacts with	CDK8 (interacts with) COG5	false
118499	interacts with	CDK8 (interacts with) UGGT1	false
118500	interacts with	CDK8 (interacts with) RTF1	false
118501	interacts with	CDK8 (interacts with) GFPT1	false
118502	interacts with	CDK8 (interacts with) MAN2A1	false
118503	interacts with	CDK8 (interacts with) SLC35E1	false
118504	interacts with	CDK8 (interacts with) COG6	false
118505	interacts with	CDK8 (interacts with) FAM20B	false
118506	interacts with	CDK8 (interacts with) SLC17A5	false
118507	interacts with	CDK8 (interacts with) GLCE	false
118508	interacts with	CDK8 (interacts with) PIGM	false
118509	interacts with	CDK9 (interacts with) DPM2	false
118510	interacts with	CDK9 (interacts with) PIGQ	false
118511	interacts with	CDK9 (interacts with) RFNG	false
118512	interacts with	CDK9 (interacts with) DPM3	false
118513	interacts with	CDK9 (interacts with) B3GAT3	false
118514	interacts with	CDK9 (interacts with) GALT	false
118515	interacts with	CDK9 (interacts with) B3GALT6	false
118516	interacts with	CDK9 (interacts with) NANS	false
118517	interacts with	CDK9 (interacts with) B3GALT4	false
118518	interacts with	CDK9 (interacts with) GPAA1	false
118519	interacts with	CDK9 (interacts with) SLC35A4	false
118520	interacts with	CDX2 (interacts with) CHST5	false
118521	interacts with	CDX2 (interacts with) GCNT3	false
118522	interacts with	CEBPB (interacts with) CHST12	false
118523	interacts with	CEBPB (interacts with) B3GAT3	false
118524	interacts with	CEBPB (interacts with) A4GALT	false
118525	interacts with	CEBPB (interacts with) IDUA	false
118526	interacts with	CEBPB (interacts with) ALG3	false
118527	interacts with	CEBPB (interacts with) RFNG	false
118528	interacts with	CEBPB (interacts with) CHPF	false
118529	interacts with	CEBPB (interacts with) B4GALT7	false
118530	interacts with	CEBPB (interacts with) B4GALT2	false
118531	interacts with	CEBPB (interacts with) POFUT2	false
118532	interacts with	CEBPD (interacts with) B3GAT3	false
118533	interacts with	CEBPD (interacts with) RFNG	false
118534	interacts with	CEBPG (interacts with) GNPNAT1	false
118535	interacts with	CEBPG (interacts with) SLC35A2	false
118536	interacts with	CEBPG (interacts with) FUT2	false
118537	interacts with	CEBPG (interacts with) SLC35C1	false
118538	interacts with	CHD1 (interacts with) MAN2A1	false
118539	interacts with	CHD1 (interacts with) OGT	false
118540	interacts with	CHD1 (interacts with) RTF1	false
118541	interacts with	CHD1 (interacts with) STT3B	false
118542	interacts with	CHD1 (interacts with) CSGALNACT2	false
118543	interacts with	CHD1 (interacts with) NEU3	false
118544	interacts with	CHD1 (interacts with) ALG13	false
118545	interacts with	CHD1 (interacts with) COG5	false
118546	interacts with	CHD1 (interacts with) MAN1A2	false
118547	interacts with	CHD1 (interacts with) COG6	false
118548	interacts with	CHD1 (interacts with) SLC35F5	false
118549	interacts with	CHD1 (interacts with) UGCG	false
118550	interacts with	CHD1 (interacts with) B3GNT2	false
118551	interacts with	CHD1 (interacts with) PIGK	false
118552	interacts with	CHD2 (interacts with) OGT	false
118553	interacts with	CHD2 (interacts with) COG3	false
118554	interacts with	CHD2 (interacts with) FKTN	false
118555	interacts with	CHD2 (interacts with) ALG10B	false
118556	interacts with	CHD2 (interacts with) STT3B	false
118557	interacts with	CHD2 (interacts with) PIGA	false
118558	interacts with	CHD8 (interacts with) NEU3	false
118559	interacts with	CHD8 (interacts with) STT3B	false
118560	interacts with	CHD8 (interacts with) FUT11	false
118561	interacts with	CHD8 (interacts with) RTF1	false
118562	interacts with	CHD8 (interacts with) COG5	false
118563	interacts with	CHD8 (interacts with) ALG10	false
118564	interacts with	CHD8 (interacts with) UGGT1	false
118565	interacts with	CHD8 (interacts with) MGAT2	false
118566	interacts with	CHD8 (interacts with) NDST2	false
118567	interacts with	CHD8 (interacts with) GANAB	false
118568	interacts with	CHD8 (interacts with) UGCG	false
118569	interacts with	CHD8 (interacts with) ALG10B	false
118570	interacts with	CHD8 (interacts with) SLC35D1	false
118571	interacts with	CHD8 (interacts with) FKTN	false
118572	interacts with	CHD8 (interacts with) GLCE	false
118573	interacts with	CHD8 (interacts with) PIGK	false
118574	interacts with	CIITA (interacts with) FUT7	false
118575	interacts with	CIITA (interacts with) LAMP3	false
118576	interacts with	CIITA (interacts with) GAL3ST4	false
118577	interacts with	CIITA (interacts with) GM2A	false
118578	interacts with	CLOCK (interacts with) FUT11	false
118579	interacts with	CLOCK (interacts with) GANAB	false
118580	interacts with	CLOCK (interacts with) FAM20B	false
118581	interacts with	CPSF3L (interacts with) B3GALT6	false
118582	interacts with	CPSF3L (interacts with) RFNG	false
118583	interacts with	CPSF3L (interacts with) PIGQ	false
118584	interacts with	CPSF3L (interacts with) B3GAT3	false
118585	interacts with	CPSF3L (interacts with) SLC35C2	false
118586	interacts with	CPSF3L (interacts with) TSTA3	false
118587	interacts with	CPSF3L (interacts with) MOGS	false
118588	interacts with	CPSF3L (interacts with) B4GALT7	false
118589	interacts with	CPSF3L (interacts with) GALE	false
118590	interacts with	CPSF3L (interacts with) COG4	false
118591	interacts with	CPSF3L (interacts with) GALT	false
118592	interacts with	CPSF3L (interacts with) GPAA1	false
118593	interacts with	CPSF3L (interacts with) B4GALT2	false
118594	interacts with	CPSF3L (interacts with) GMPPA	false
118595	interacts with	CPSF3L (interacts with) B3GALT4	false
118596	interacts with	CPSF3L (interacts with) ALG3	false
118597	interacts with	CPSF3L (interacts with) B3GNT8	false
118598	interacts with	CPSF3L (interacts with) CHPF	false
118599	interacts with	CREB3 (interacts with) GMPPA	false
118600	interacts with	CREB3 (interacts with) PIGO	false
118601	interacts with	CREB3 (interacts with) ALG3	false
118602	interacts with	CREB3L2 (interacts with) FUT11	false
118603	interacts with	CREB3L2 (interacts with) NDST2	false
118604	interacts with	CREB3L4 (interacts with) GMPPA	false
118605	interacts with	CREB3L4 (interacts with) GALNT4	false
118606	interacts with	CTBP1 (interacts with) B3GAT3	false
118607	interacts with	CTBP1 (interacts with) DPM2	false
118608	interacts with	CTBP1 (interacts with) CHST12	false
118609	interacts with	CTBP1 (interacts with) B4GALT7	false
118610	interacts with	CTBP2 (interacts with) PIGM	false
118611	interacts with	CTBP2 (interacts with) PIGO	false
118612	interacts with	CTBP2 (interacts with) HS3ST1	false
118613	interacts with	CTBP2 (interacts with) COG3	false
118614	interacts with	CTBP2 (interacts with) UGT8	false
118615	interacts with	CTBP2 (interacts with) GALE	false
118616	interacts with	CTNNB1 (interacts with) STT3B	false
118617	interacts with	CTNNB1 (interacts with) FUT11	false
118618	interacts with	CTNNB1 (interacts with) PAPSS1	false
118619	interacts with	CTNNB1 (interacts with) EXT2	false
118620	interacts with	CTNNB1 (interacts with) XYLT1	false
118621	interacts with	CTNNB1 (interacts with) GANAB	false
118622	interacts with	CTNNB1 (interacts with) RTF1	false
118623	interacts with	CTNNB1 (interacts with) LAMP2	false
118624	interacts with	DCP1A (interacts with) STT3B	false
118625	interacts with	DCP1A (interacts with) SLC35D1	false
118626	interacts with	DDIT3 (interacts with) SLC35B1	false
118627	interacts with	DR1 (interacts with) FUT11	false
118628	interacts with	E2F4 (interacts with) COG4	false
118629	interacts with	E2F4 (interacts with) MOGS	false
118630	interacts with	E2F4 (interacts with) ALG3	false
118631	interacts with	E2F4 (interacts with) B4GALT3	false
118632	interacts with	E2F4 (interacts with) GMPPA	false
118633	interacts with	E2F4 (interacts with) PMM2	false
118634	interacts with	E2F8 (interacts with) GPI	false
118635	interacts with	E2F8 (interacts with) SLC35A2	false
118636	interacts with	EBF1 (interacts with) CSGALNACT1	false
118637	interacts with	EBF1 (interacts with) ST6GALNAC3	false
118638	interacts with	EBF1 (interacts with) ST3GAL2	false
118639	interacts with	EBF1 (interacts with) CHSY1	false
118640	interacts with	EBF1 (interacts with) PAPSS2	false
118641	interacts with	EBF1 (interacts with) SLC35B4	false
118642	interacts with	EBF1 (interacts with) ST6GALNAC6	false
118643	interacts with	EBF1 (interacts with) MGAT4A	false
118644	interacts with	EBF1 (interacts with) ST3GAL3	false
118645	interacts with	EBF1 (interacts with) LIPA	false
118646	interacts with	EBF1 (interacts with) TPST1	false
118647	interacts with	EBF1 (interacts with) CHST2	false
118648	interacts with	EBF1 (interacts with) SMPD1	false
118649	interacts with	EBF1 (interacts with) ST8SIA4	false
118650	interacts with	EBF1 (interacts with) SLC35F1	false
118651	interacts with	EBF1 (interacts with) CHST10	false
118652	interacts with	EBF1 (interacts with) GM2A	false
118653	interacts with	EBF1 (interacts with) GALNT11	false
118654	interacts with	EBF1 (interacts with) B4GALT6	false
118655	interacts with	EBF1 (interacts with) GAL3ST4	false
118656	interacts with	EGLN2 (interacts with) B3GAT3	false
118657	interacts with	EGLN2 (interacts with) DPM2	false
118658	interacts with	EGLN2 (interacts with) ARSA	false
118659	interacts with	EGR2 (interacts with) GFPT2	false
118660	interacts with	EGR2 (interacts with) SULF1	false
118661	interacts with	EGR2 (interacts with) CHSY3	false
118662	interacts with	EGR2 (interacts with) PAPSS2	false
118663	interacts with	EGR2 (interacts with) NPL	false
118664	interacts with	EGR2 (interacts with) IDS	false
118665	interacts with	EGR2 (interacts with) GALNT11	false
118666	interacts with	EGR2 (interacts with) MGAT4A	false
118667	interacts with	EHF (interacts with) SLC35A3	false
118668	interacts with	EHF (interacts with) ALG10	false
118669	interacts with	EHF (interacts with) UGGT1	false
118670	interacts with	EHF (interacts with) COG5	false
118671	interacts with	EHF (interacts with) GALNT7	false
118672	interacts with	EHF (interacts with) RTF1	false
118673	interacts with	EHF (interacts with) STT3A	false
118674	interacts with	EHF (interacts with) B3GALT5	false
118675	interacts with	ELF1 (interacts with) COG3	false
118676	interacts with	ELF1 (interacts with) COG6	false
118677	interacts with	ELF1 (interacts with) SLC35A5	false
118678	interacts with	ELF1 (interacts with) SLC35A3	false
118679	interacts with	ELF1 (interacts with) MAN1A2	false
118680	interacts with	ELF1 (interacts with) SLC35B3	false
118681	interacts with	ELF1 (interacts with) UGCG	false
118682	interacts with	ELF1 (interacts with) UGGT1	false
118683	interacts with	ELF1 (interacts with) GALNT7	false
118684	interacts with	ELF1 (interacts with) SLC35F5	false
118685	interacts with	ELF1 (interacts with) MGAT2	false
118686	interacts with	ELF1 (interacts with) B3GNT2	false
118687	interacts with	ELF1 (interacts with) GALC	false
118688	interacts with	ELF1 (interacts with) SLC17A5	false
118689	interacts with	ELF1 (interacts with) GFPT1	false
118690	interacts with	ELF1 (interacts with) PIGM	false
118691	interacts with	ELF1 (interacts with) FPGT	false
118692	interacts with	ELF1 (interacts with) UGP2	false
118693	interacts with	ELK3 (interacts with) FUT11	false
118694	interacts with	ELK3 (interacts with) GANAB	false
118695	interacts with	ELL (interacts with) ST3GAL2	false
118696	interacts with	ELL2 (interacts with) DSEL	false
118697	interacts with	ELL2 (interacts with) MAN1A1	false
118698	interacts with	ELL2 (interacts with) MGAT4A	false
118699	interacts with	ELL2 (interacts with) ST6GALNAC3	false
118700	interacts with	ELL2 (interacts with) GALNT13	false
118701	interacts with	ELL2 (interacts with) CSGALNACT2	false
118702	interacts with	ERCC6 (interacts with) MAN1A2	false
118703	interacts with	ERCC6 (interacts with) STT3B	false
118704	interacts with	ERCC6 (interacts with) NDST2	false
118705	interacts with	ERCC6 (interacts with) COG5	false
118706	interacts with	ERCC6 (interacts with) MAN2A1	false
118707	interacts with	ERCC6 (interacts with) UGGT1	false
118708	interacts with	ERCC6 (interacts with) COG6	false
118709	interacts with	ERCC6 (interacts with) UGCG	false
118710	interacts with	ERCC6 (interacts with) SLC35D1	false
118711	interacts with	ERCC6 (interacts with) SLC35A5	false
118712	interacts with	ERCC6 (interacts with) RTF1	false
118713	interacts with	ERCC6 (interacts with) GANAB	false
118714	interacts with	ERCC6 (interacts with) GLCE	false
118715	interacts with	ERCC6 (interacts with) POFUT1	false
118716	interacts with	ERCC6 (interacts with) MGAT4A	false
118717	interacts with	ERF (interacts with) MOGS	false
118718	interacts with	ERF (interacts with) PIGQ	false
118719	interacts with	ERF (interacts with) CHST12	false
118720	interacts with	ERF (interacts with) RFNG	false
118721	interacts with	ERF (interacts with) GPAA1	false
118722	interacts with	ERG (interacts with) MFNG	false
118723	interacts with	ERG (interacts with) CHSY3	false
118724	interacts with	ERG (interacts with) ST6GALNAC3	false
118725	interacts with	ERG (interacts with) ST8SIA4	false
118726	interacts with	ERG (interacts with) NDST1	false
118727	interacts with	ERG (interacts with) MAN1C1	false
118728	interacts with	ERG (interacts with) ST3GAL2	false
118729	interacts with	ERG (interacts with) ST6GALNAC6	false
118730	interacts with	ERG (interacts with) LIPA	false
118731	interacts with	ERG (interacts with) ST3GAL3	false
118732	interacts with	ERG (interacts with) GM2A	false
118733	interacts with	ERG (interacts with) B4GALT6	false
118734	interacts with	ERG (interacts with) SLC35F1	false
118735	interacts with	ERG (interacts with) B3GALT2	false
118736	interacts with	ERG (interacts with) SMPD1	false
118737	interacts with	ERG (interacts with) PIGK	false
118738	interacts with	ERG (interacts with) CHST10	false
118739	interacts with	ERG (interacts with) NPL	false
118740	interacts with	ERG (interacts with) GCNT4	false
118741	interacts with	ESRRA (interacts with) RFNG	false
118742	interacts with	ESRRA (interacts with) TSTA3	false
118743	interacts with	ESRRA (interacts with) GALE	false
118744	interacts with	ESRRA (interacts with) GMPPA	false
118745	interacts with	ESRRA (interacts with) GPAA1	false
118746	interacts with	ESRRA (interacts with) PIGQ	false
118747	interacts with	ESRRA (interacts with) B3GNT3	false
118748	interacts with	ESRRA (interacts with) ALG3	false
118749	interacts with	ESRRA (interacts with) COG7	false
118750	interacts with	ESRRA (interacts with) MOGS	false
118751	interacts with	ESRRA (interacts with) B3GNT8	false
118752	interacts with	ESRRA (interacts with) NANS	false
118753	interacts with	ESRRA (interacts with) HYAL3	false
118754	interacts with	ESRRA (interacts with) B3GALT4	false
118755	interacts with	ETS1 (interacts with) CHST11	false
118756	interacts with	ETS1 (interacts with) ST8SIA4	false
118757	interacts with	ETS1 (interacts with) NDST1	false
118758	interacts with	ETS1 (interacts with) CHSY1	false
118759	interacts with	ETS1 (interacts with) MGAT4A	false
118760	interacts with	ETS1 (interacts with) LIPA	false
118761	interacts with	ETS1 (interacts with) GFPT2	false
118762	interacts with	ETS1 (interacts with) NEU3	false
118763	interacts with	ETS1 (interacts with) XYLT1	false
118764	interacts with	ETS1 (interacts with) SULF1	false
118765	interacts with	ETS1 (interacts with) CSGALNACT1	false
118766	interacts with	ETS1 (interacts with) MGAT5	false
118767	interacts with	ETS1 (interacts with) ST8SIA1	false
118768	interacts with	ETS1 (interacts with) CHST3	false
118769	interacts with	ETS1 (interacts with) MAN1A1	false
118770	interacts with	ETS1 (interacts with) PAPSS2	false
118771	interacts with	ETS1 (interacts with) MAN2A1	false
118772	interacts with	ETS1 (interacts with) GM2A	false
118773	interacts with	ETS1 (interacts with) DSE	false
118774	interacts with	ETS1 (interacts with) EXTL3	false
118775	interacts with	ETS1 (interacts with) EXT2	false
118776	interacts with	ETS1 (interacts with) UGCG	false
118777	interacts with	ETS1 (interacts with) POFUT1	false
118778	interacts with	ETS1 (interacts with) MAN1A2	false
118779	interacts with	ETS1 (interacts with) ARSB	false
118780	interacts with	ETS1 (interacts with) TPST1	false
118781	interacts with	ETS1 (interacts with) PIGK	false
118782	interacts with	ETS1 (interacts with) B3GALNT1	false
118783	interacts with	ETV1 (interacts with) ARSB	false
118784	interacts with	ETV1 (interacts with) SULF1	false
118785	interacts with	ETV1 (interacts with) CHSY3	false
118786	interacts with	ETV1 (interacts with) XYLT1	false
118787	interacts with	ETV1 (interacts with) GLCE	false
118788	interacts with	ETV1 (interacts with) ST6GAL2	false
118789	interacts with	ETV1 (interacts with) DSE	false
118790	interacts with	ETV1 (interacts with) PAPSS1	false
118791	interacts with	ETV1 (interacts with) MAN1A1	false
118792	interacts with	ETV1 (interacts with) ST6GALNAC5	false
118793	interacts with	ETV1 (interacts with) PIGK	false
118794	interacts with	ETV1 (interacts with) HS2ST1	false
118795	interacts with	ETV1 (interacts with) IDS	false
118796	interacts with	ETV1 (interacts with) LAMP2	false
118797	interacts with	ETV1 (interacts with) GNS	false
118798	interacts with	ETV7 (interacts with) MOGS	false
118799	interacts with	ETV7 (interacts with) SULT1C2	false
118800	interacts with	EZH1 (interacts with) OGT	false
118801	interacts with	EZH1 (interacts with) NDST2	false
118802	interacts with	EZH1 (interacts with) POFUT2	false
118803	interacts with	FLI1 (interacts with) MFNG	false
118804	interacts with	FLI1 (interacts with) ST8SIA4	false
118805	interacts with	FLI1 (interacts with) MGAT4A	false
118806	interacts with	FLI1 (interacts with) ST3GAL2	false
118807	interacts with	FLI1 (interacts with) ST6GAL1	false
118808	interacts with	FLI1 (interacts with) MAN1C1	false
118809	interacts with	FLI1 (interacts with) ST8SIA1	false
118810	interacts with	FLI1 (interacts with) ST3GAL5	false
118811	interacts with	FLI1 (interacts with) CSGALNACT1	false
118812	interacts with	FLI1 (interacts with) NDST1	false
118813	interacts with	FLI1 (interacts with) ST6GALNAC3	false
118814	interacts with	FLI1 (interacts with) CHSY1	false
118815	interacts with	FLI1 (interacts with) PAPSS2	false
118816	interacts with	FLI1 (interacts with) CHST2	false
118817	interacts with	FLI1 (interacts with) ST6GALNAC6	false
118818	interacts with	FLI1 (interacts with) DSE	false
118819	interacts with	FLI1 (interacts with) ARSB	false
118820	interacts with	FLI1 (interacts with) GFPT2	false
118821	interacts with	FLI1 (interacts with) LIPA	false
118822	interacts with	FLI1 (interacts with) CTNS	false
118823	interacts with	FOSL2 (interacts with) CHSY1	false
118824	interacts with	FOSL2 (interacts with) CSGALNACT2	false
118825	interacts with	FOSL2 (interacts with) SLC35D1	false
118826	interacts with	FOXA1 (interacts with) GALNT4	false
118827	interacts with	FOXA1 (interacts with) GALNT7	false
118828	interacts with	FOXA1 (interacts with) SLC35A3	false
118829	interacts with	FOXA1 (interacts with) GALNT3	false
118830	interacts with	FOXA1 (interacts with) SLC35C1	false
118831	interacts with	FOXA1 (interacts with) C1GALT1	false
118832	interacts with	FOXA2 (interacts with) GALNT4	false
118833	interacts with	FOXA2 (interacts with) GMDS	false
118834	interacts with	FOXA2 (interacts with) SLC35D2	false
118835	interacts with	FOXA2 (interacts with) AGA	false
118836	interacts with	FOXO1 (interacts with) CSGALNACT2	false
118837	interacts with	FOXO1 (interacts with) DSE	false
118838	interacts with	FOXO1 (interacts with) ST6GALNAC3	false
118839	interacts with	FOXO1 (interacts with) CHST3	false
118840	interacts with	FOXO1 (interacts with) GFPT2	false
118841	interacts with	FOXO1 (interacts with) DSEL	false
118842	interacts with	FOXO1 (interacts with) NDST1	false
118843	interacts with	FOXO1 (interacts with) SULF1	false
118844	interacts with	FOXO1 (interacts with) ST3GAL2	false
118845	interacts with	FOXO1 (interacts with) ARSB	false
118846	interacts with	FOXO1 (interacts with) FUT11	false
118847	interacts with	FOXO1 (interacts with) PAPSS2	false
118848	interacts with	FOXO1 (interacts with) HAS2	false
118849	interacts with	FOXO1 (interacts with) CHST2	false
118850	interacts with	FOXO1 (interacts with) ASAH1	false
118851	interacts with	FOXO1 (interacts with) XYLT1	false
118852	interacts with	FOXO1 (interacts with) TPST1	false
118853	interacts with	FOXO1 (interacts with) PIGK	false
118854	interacts with	FOXO1 (interacts with) LIPA	false
118855	interacts with	FOXO1 (interacts with) ST8SIA4	false
118856	interacts with	FOXO1 (interacts with) ST6GALNAC6	false
118857	interacts with	FOXO1 (interacts with) GM2A	false
118858	interacts with	FOXO1 (interacts with) HS2ST1	false
118859	interacts with	FOXO1 (interacts with) NDST2	false
118860	interacts with	FOXO1 (interacts with) EXTL2	false
118861	interacts with	FOXO1 (interacts with) ST3GAL3	false
118862	interacts with	FOXO1 (interacts with) CHST7	false
118863	interacts with	FOXP3 (interacts with) FUT7	false
118864	interacts with	FOXP3 (interacts with) ST8SIA4	false
118865	interacts with	FOXP3 (interacts with) LIPA	false
118866	interacts with	FOXP3 (interacts with) ST8SIA1	false
118867	interacts with	FOXP3 (interacts with) GBGT1	false
118868	interacts with	FOXP3 (interacts with) ST3GAL2	false
118869	interacts with	FOXQ1 (interacts with) TSTA3	false
118870	interacts with	GATA6 (interacts with) FUT4	false
118871	interacts with	GATA6 (interacts with) FUT2	false
118872	interacts with	GATA6 (interacts with) GMDS	false
118873	interacts with	GATA6 (interacts with) SULT1B1	false
118874	interacts with	GATA6 (interacts with) GALNT4	false
118875	interacts with	GATA6 (interacts with) SLC35D2	false
118876	interacts with	GATA6 (interacts with) B4GALNT3	false
118877	interacts with	GATA6 (interacts with) ARSD	false
118878	interacts with	GATAD1 (interacts with) PIGL	false
118879	interacts with	GATAD1 (interacts with) OGT	false
118880	interacts with	GATAD1 (interacts with) ALG13	false
118881	interacts with	GATAD1 (interacts with) POFUT2	false
118882	interacts with	GATAD1 (interacts with) COG3	false
118883	interacts with	GATAD1 (interacts with) COG7	false
118884	interacts with	GATAD1 (interacts with) GALNT4	false
118885	interacts with	GATAD1 (interacts with) B3GNT3	false
118886	interacts with	GATAD1 (interacts with) SLC35A3	false
118887	interacts with	GATAD1 (interacts with) GALNT12	false
118888	interacts with	GATAD1 (interacts with) MOGS	false
118889	interacts with	GLI1 (interacts with) SULF1	false
118890	interacts with	GLI1 (interacts with) ST3GAL2	false
118891	interacts with	GLI1 (interacts with) MAN1C1	false
118892	interacts with	GLI2 (interacts with) ST3GAL2	false
118893	interacts with	GLI2 (interacts with) FUT11	false
118894	interacts with	GLI3 (interacts with) CHST14	false
118895	interacts with	GLYR1 (interacts with) COG7	false
118896	interacts with	GLYR1 (interacts with) ALG1	false
118897	interacts with	GLYR1 (interacts with) COG5	false
118898	interacts with	GLYR1 (interacts with) SLC35D1	false
118899	interacts with	GLYR1 (interacts with) B4GALNT3	false
118900	interacts with	GRHL1 (interacts with) GALNT3	false
118901	interacts with	GRHL1 (interacts with) MOGS	false
118902	interacts with	GRHL1 (interacts with) B4GALNT3	false
118903	interacts with	GRHL2 (interacts with) B4GALNT3	false
118904	interacts with	GRHL2 (interacts with) ARSD	false
118905	interacts with	GRHL2 (interacts with) COG3	false
118906	interacts with	GRHL2 (interacts with) COG7	false
118907	interacts with	GRHL2 (interacts with) GALNT7	false
118908	interacts with	GRHL2 (interacts with) SLC35F2	false
118909	interacts with	GRHL2 (interacts with) GALNT3	false
118910	interacts with	GRHL2 (interacts with) B3GNT3	false
118911	interacts with	GRHL2 (interacts with) ALG8	false
118912	interacts with	GRHL2 (interacts with) GALNT12	false
118913	interacts with	GRHL2 (interacts with) B4GALT5	false
118914	interacts with	GRHL2 (interacts with) B3GALT5	false
118915	interacts with	GTF2B (interacts with) GALE	false
118916	interacts with	GTF2F1 (interacts with) MOGS	false
118917	interacts with	GTF2F1 (interacts with) B3GALT4	false
118918	interacts with	GTF2F1 (interacts with) ALG3	false
118919	interacts with	GTF2F1 (interacts with) B3GNT3	false
118920	interacts with	GTF2F1 (interacts with) GALT	false
118921	interacts with	HDAC1 (interacts with) GALE	false
118922	interacts with	HDAC1 (interacts with) B3GNT3	false
118923	interacts with	HDAC1 (interacts with) FUT2	false
118924	interacts with	HDAC1 (interacts with) COG7	false
118925	interacts with	HDAC1 (interacts with) SLC35A3	false
118926	interacts with	HDAC1 (interacts with) SLC35A2	false
118927	interacts with	HDAC1 (interacts with) SLC35C1	false
118928	interacts with	HDAC1 (interacts with) PMM2	false
118929	interacts with	HDAC1 (interacts with) GFPT1	false
118930	interacts with	HDAC1 (interacts with) PIGG	false
118931	interacts with	HDAC6 (interacts with) OGT	false
118932	interacts with	HDAC6 (interacts with) MAN2A2	false
118933	interacts with	HDAC6 (interacts with) POFUT2	false
118934	interacts with	HDAC6 (interacts with) MOGS	false
118935	interacts with	HDAC6 (interacts with) PIGL	false
118936	interacts with	HDAC6 (interacts with) ALG13	false
118937	interacts with	HDAC6 (interacts with) FKRP	false
118938	interacts with	HDAC6 (interacts with) SLC35A4	false
118939	interacts with	HECTD1 (interacts with) FUT11	false
118940	interacts with	HECTD1 (interacts with) UGCG	false
118941	interacts with	HECTD1 (interacts with) FAM20B	false
118942	interacts with	HECTD1 (interacts with) GALNT10	false
118943	interacts with	HES1 (interacts with) TSTA3	false
118944	interacts with	HES1 (interacts with) LFNG	false
118945	interacts with	HES1 (interacts with) FUT2	false
118946	interacts with	HES4 (interacts with) GALK1	false
118947	interacts with	HES4 (interacts with) MAN1B1	false
118948	interacts with	HES4 (interacts with) GPAA1	false
118949	interacts with	HEXIM1 (interacts with) XYLT2	false
118950	interacts with	HEXIM1 (interacts with) MOGS	false
118951	interacts with	HEY1 (interacts with) CHST7	false
118952	interacts with	HEY1 (interacts with) ST3GAL2	false
118953	interacts with	HEY1 (interacts with) NDST1	false
118954	interacts with	HEY1 (interacts with) GFPT2	false
118955	interacts with	HEY1 (interacts with) CHSY1	false
118956	interacts with	HIF1A (interacts with) STT3B	false
118957	interacts with	HIF1A (interacts with) MAN2A1	false
118958	interacts with	HIF1A (interacts with) CHSY1	false
118959	interacts with	HIF1A (interacts with) FUT11	false
118960	interacts with	HIF1A (interacts with) SLC35F5	false
118961	interacts with	HIF1A (interacts with) COG6	false
118962	interacts with	HIF1A (interacts with) MAN1A2	false
118963	interacts with	HIF1A (interacts with) NEU3	false
118964	interacts with	HIF1A (interacts with) MGAT5	false
118965	interacts with	HIF1A (interacts with) ASAH1	false
118966	interacts with	HIF1A (interacts with) GNS	false
118967	interacts with	HIF1A (interacts with) ALG10B	false
118968	interacts with	HIF1A (interacts with) GALNT1	false
118969	interacts with	HIF1A (interacts with) UGDH	false
118970	interacts with	HIF1A (interacts with) SLC35A5	false
118971	interacts with	HIF1A (interacts with) ARSB	false
118972	interacts with	HIF1A (interacts with) SLC35B4	false
118973	interacts with	HIF1A (interacts with) LAMP2	false
118974	interacts with	HIF1A (interacts with) SULT1C4	false
118975	interacts with	HIF1A (interacts with) MAN1A1	false
118976	interacts with	HIF1A (interacts with) PIGK	false
118977	interacts with	HIF1A (interacts with) DSE	false
118978	interacts with	HIF1A (interacts with) UGGT2	false
118979	interacts with	HINFP (interacts with) DPAGT1	false
118980	interacts with	HINFP (interacts with) MOGS	false
118981	interacts with	HJURP (interacts with) B3GNT3	false
118982	interacts with	HNF1B (interacts with) GAL3ST1	false
118983	interacts with	HNF1B (interacts with) ARSD	false
118984	interacts with	HNF4A (interacts with) SLC35A3	false
118985	interacts with	HNF4A (interacts with) SLC35D1	false
118986	interacts with	HNF4A (interacts with) GALNT7	false
118987	interacts with	HNF4A (interacts with) B4GALT4	false
118988	interacts with	HNF4A (interacts with) GFPT1	false
118989	interacts with	HNF4A (interacts with) GCNT3	false
118990	interacts with	HNF4A (interacts with) FUT4	false
118991	interacts with	HNF4A (interacts with) UGT8	false
118992	interacts with	HNF4A (interacts with) GCNT1	false
118993	interacts with	HNF4A (interacts with) GLCE	false
118994	interacts with	HNF4A (interacts with) B4GALNT3	false
118995	interacts with	HNF4A (interacts with) B3GNT3	false
118996	interacts with	HNF4A (interacts with) GALNT4	false
118997	interacts with	HNF4A (interacts with) B3GALT5	false
118998	interacts with	HNF4A (interacts with) ST6GALNAC1	false
118999	interacts with	HNF4A (interacts with) GALNT6	false
119000	interacts with	HNF4A (interacts with) FUT2	false
119001	interacts with	HNF4A (interacts with) SULT1B1	false
119002	interacts with	HNF4A (interacts with) SLC35D2	false
119003	interacts with	HNF4A (interacts with) SLC17A5	false
119004	interacts with	HNF4A (interacts with) SLC35F5	false
119005	interacts with	HNF4A (interacts with) GMDS	false
119006	interacts with	HNF4A (interacts with) COG7	false
119007	interacts with	HNF4A (interacts with) SLC35C1	false
119008	interacts with	HNF4A (interacts with) ABO	false
119009	interacts with	HNF4A (interacts with) PIGM	false
119010	interacts with	HNF4A (interacts with) C1GALT1	false
119011	interacts with	HNF4G (interacts with) SLC35A3	false
119012	interacts with	HNF4G (interacts with) GLCE	false
119013	interacts with	HNF4G (interacts with) SULT1B1	false
119014	interacts with	HNF4G (interacts with) COG3	false
119015	interacts with	HNF4G (interacts with) GALK2	false
119016	interacts with	HNF4G (interacts with) GALC	false
119017	interacts with	HNF4G (interacts with) SLC35D1	false
119018	interacts with	HNF4G (interacts with) SLC17A5	false
119019	interacts with	HNF4G (interacts with) FUT10	false
119020	interacts with	HNF4G (interacts with) GALNT4	false
119021	interacts with	HNF4G (interacts with) FUT2	false
119022	interacts with	HNF4G (interacts with) SLC35D2	false
119023	interacts with	HNF4G (interacts with) FUT6	false
119024	interacts with	HNF4G (interacts with) COG2	false
119025	interacts with	HNF4G (interacts with) PIGM	false
119026	interacts with	HNF4G (interacts with) GALNT6	false
119027	interacts with	HNF4G (interacts with) ABO	false
119028	interacts with	HNF4G (interacts with) C1GALT1	false
119029	interacts with	HNF4G (interacts with) B3GNT2	false
119030	interacts with	HNF4G (interacts with) GCNT4	false
119031	interacts with	HNF4G (interacts with) B4GALNT3	false
119032	interacts with	HNF4G (interacts with) B4GALT4	false
119033	interacts with	HNF4G (interacts with) ARSD	false
119034	interacts with	HOXA13 (interacts with) B3GALT5	false
119035	interacts with	HOXA4 (interacts with) ST3GAL2	false
119036	interacts with	HOXB4 (interacts with) ST3GAL2	false
119037	interacts with	HOXB4 (interacts with) B3GNT9	false
119038	interacts with	HOXB4 (interacts with) GALNS	false
119039	interacts with	HSF1 (interacts with) TSTA3	false
119040	interacts with	HSF1 (interacts with) GPAA1	false
119041	interacts with	HSF1 (interacts with) RFNG	false
119042	interacts with	HSF1 (interacts with) DPM2	false
119043	interacts with	HSF1 (interacts with) B4GALT2	false
119044	interacts with	HSF1 (interacts with) B3GAT3	false
119045	interacts with	HSF1 (interacts with) ALG3	false
119046	interacts with	HSF1 (interacts with) PIGQ	false
119047	interacts with	HSF1 (interacts with) SLC35C2	false
119048	interacts with	HSF1 (interacts with) B4GALT3	false
119049	interacts with	HSF1 (interacts with) MOGS	false
119050	interacts with	HSF1 (interacts with) GMPPA	false
119051	interacts with	HSF1 (interacts with) MGAT4B	false
119052	interacts with	HSF1 (interacts with) B3GNT3	false
119053	interacts with	HSF1 (interacts with) SLC35A2	false
119054	interacts with	HSF1 (interacts with) COG4	false
119055	interacts with	HSF1 (interacts with) RPN1	false
119056	interacts with	HSF1 (interacts with) IDUA	false
119057	interacts with	HSF1 (interacts with) B3GALT4	false
119058	interacts with	IKZF1 (interacts with) MFNG	false
119059	interacts with	IKZF1 (interacts with) ST8SIA4	false
119060	interacts with	IKZF1 (interacts with) LAMP3	false
119061	interacts with	IKZF1 (interacts with) MGAT4A	false
119062	interacts with	IKZF1 (interacts with) GM2A	false
119063	interacts with	IKZF1 (interacts with) ST3GAL5	false
119064	interacts with	IKZF1 (interacts with) ST6GAL1	false
119065	interacts with	IKZF1 (interacts with) MAN1C1	false
119066	interacts with	IKZF1 (interacts with) NDST2	false
119067	interacts with	IKZF1 (interacts with) DSE	false
119068	interacts with	IKZF1 (interacts with) NPL	false
119069	interacts with	IKZF1 (interacts with) ST3GAL2	false
119070	interacts with	IKZF1 (interacts with) GFPT2	false
119071	interacts with	IKZF1 (interacts with) ST6GALNAC6	false
119072	interacts with	IKZF1 (interacts with) NDST1	false
119073	interacts with	INO80 (interacts with) RTF1	false
119074	interacts with	INO80 (interacts with) COG3	false
119075	interacts with	INTS3 (interacts with) IDUA	false
119076	interacts with	INTS3 (interacts with) COG3	false
119077	interacts with	IRF1 (interacts with) LAMP3	false
119078	interacts with	IRF2 (interacts with) SLC35D1	false
119079	interacts with	IRF3 (interacts with) B3GAT3	false
119080	interacts with	IRF3 (interacts with) RFNG	false
119081	interacts with	IRF3 (interacts with) PIGQ	false
119082	interacts with	IRF3 (interacts with) MOGS	false
119083	interacts with	IRF3 (interacts with) TSTA3	false
119084	interacts with	IRF3 (interacts with) PIGL	false
119085	interacts with	IRF3 (interacts with) SLC35C2	false
119086	interacts with	IRF3 (interacts with) GPAA1	false
119087	interacts with	IRF4 (interacts with) MFNG	false
119088	interacts with	IRF4 (interacts with) FUT7	false
119089	interacts with	IRF4 (interacts with) ST8SIA4	false
119090	interacts with	IRF4 (interacts with) ST8SIA1	false
119091	interacts with	IRF4 (interacts with) ST6GAL1	false
119092	interacts with	IRF4 (interacts with) GM2A	false
119093	interacts with	IRF4 (interacts with) LIPA	false
119094	interacts with	IRF4 (interacts with) MGAT4A	false
119095	interacts with	IRF4 (interacts with) ARSB	false
119096	interacts with	IRF4 (interacts with) NAAA	false
119097	interacts with	IRF4 (interacts with) NDST1	false
119098	interacts with	IRF4 (interacts with) HAS1	false
119099	interacts with	IRF5 (interacts with) MFNG	false
119100	interacts with	IRF5 (interacts with) GBGT1	false
119101	interacts with	IRF8 (interacts with) ST8SIA4	false
119102	interacts with	IRF8 (interacts with) LIPA	false
119103	interacts with	IRF8 (interacts with) GM2A	false
119104	interacts with	ISL1 (interacts with) MAN1C1	false
119105	interacts with	ISL1 (interacts with) ST8SIA3	false
119106	interacts with	ISL1 (interacts with) PAPSS2	false
119107	interacts with	JMJD1C (interacts with) FUT11	false
119108	interacts with	JMJD1C (interacts with) STT3B	false
119109	interacts with	JMJD1C (interacts with) CSGALNACT2	false
119110	interacts with	JMJD1C (interacts with) MAN1A2	false
119111	interacts with	JMJD1C (interacts with) NDST2	false
119112	interacts with	JMJD1C (interacts with) NEU3	false
119113	interacts with	JMJD1C (interacts with) MGAT5	false
119114	interacts with	JMJD1C (interacts with) SLC35A5	false
119115	interacts with	JMJD1C (interacts with) COG5	false
119116	interacts with	JMJD1C (interacts with) GALNT10	false
119117	interacts with	JMJD1C (interacts with) UGCG	false
119118	interacts with	JMJD1C (interacts with) FKTN	false
119119	interacts with	JMJD1C (interacts with) GLCE	false
119120	interacts with	JMJD1C (interacts with) PIGK	false
119121	interacts with	JMJD1C (interacts with) SLC35B4	false
119122	interacts with	JMJD1C (interacts with) CTBS	false
119123	interacts with	JMJD1C (interacts with) PIGA	false
119124	interacts with	JMJD1C (interacts with) GALC	false
119125	interacts with	JMJD6 (interacts with) RFNG	false
119126	interacts with	JUNB (interacts with) CHST12	false
119127	interacts with	JUNB (interacts with) RFNG	false
119128	interacts with	JUNB (interacts with) SLC35C2	false
119129	interacts with	JUNB (interacts with) PIGQ	false
119130	interacts with	JUNB (interacts with) B3GALT4	false
119131	interacts with	JUNB (interacts with) GPAA1	false
119132	interacts with	JUND (interacts with) DPM3	false
119133	interacts with	JUND (interacts with) RFNG	false
119134	interacts with	JUND (interacts with) DPM2	false
119135	interacts with	JUND (interacts with) B3GAT3	false
119136	interacts with	JUND (interacts with) CHST12	false
119137	interacts with	JUND (interacts with) IDUA	false
119138	interacts with	JUND (interacts with) B3GNT8	false
119139	interacts with	JUND (interacts with) SLC35E4	false
119140	interacts with	JUND (interacts with) GALT	false
119141	interacts with	JUND (interacts with) B4GALT7	false
119142	interacts with	JUND (interacts with) GMPPA	false
119143	interacts with	JUND (interacts with) SLC35C2	false
119144	interacts with	KAT2B (interacts with) MAN1A1	false
119145	interacts with	KAT2B (interacts with) SLC35A5	false
119146	interacts with	KAT2B (interacts with) MAN1C1	false
119147	interacts with	KAT2B (interacts with) NDST2	false
119148	interacts with	KAT2B (interacts with) MAN1A2	false
119149	interacts with	KAT2B (interacts with) GCNT4	false
119150	interacts with	KAT2B (interacts with) MGAT4A	false
119151	interacts with	KAT2B (interacts with) SULT1C4	false
119152	interacts with	KAT2B (interacts with) DSEL	false
119153	interacts with	KAT2B (interacts with) CHST9	false
119154	interacts with	KAT2B (interacts with) ST8SIA3	false
119155	interacts with	KAT2B (interacts with) B3GALT2	false
119156	interacts with	KAT2B (interacts with) PIGN	false
119157	interacts with	KAT2B (interacts with) HS6ST3	false
119158	interacts with	KDM4C (interacts with) FKTN	false
119159	interacts with	KDM4C (interacts with) COG3	false
119160	interacts with	KDM4C (interacts with) COG5	false
119161	interacts with	KDM4C (interacts with) UGCG	false
119162	interacts with	KDM5A (interacts with) ALG10	false
119163	interacts with	KDM5A (interacts with) NEU3	false
119164	interacts with	KDM5A (interacts with) ALG10B	false
119165	interacts with	KDM5A (interacts with) MAN2A1	false
119166	interacts with	KDM5A (interacts with) UGGT1	false
119167	interacts with	KDM5A (interacts with) FUT11	false
119168	interacts with	KDM5A (interacts with) COG5	false
119169	interacts with	KDM5A (interacts with) SLC35F5	false
119170	interacts with	KDM5A (interacts with) RTF1	false
119171	interacts with	KDM5A (interacts with) PIGN	false
119172	interacts with	KDM5A (interacts with) SLC35A5	false
119173	interacts with	KDM5A (interacts with) HS2ST1	false
119174	interacts with	KDM5A (interacts with) GANAB	false
119175	interacts with	KDM5A (interacts with) PIGK	false
119176	interacts with	KDM5B (interacts with) UGGT1	false
119177	interacts with	KDM5B (interacts with) FAM20B	false
119178	interacts with	KDM5B (interacts with) SLC35A3	false
119179	interacts with	KDM5B (interacts with) FKTN	false
119180	interacts with	KDM5B (interacts with) GFPT1	false
119181	interacts with	KDM5B (interacts with) SLC35F5	false
119182	interacts with	KDM5B (interacts with) ALG11	false
119183	interacts with	KDM5B (interacts with) STT3A	false
119184	interacts with	KDM5B (interacts with) GALNT3	false
119185	interacts with	KDM5B (interacts with) C1GALT1	false
119186	interacts with	KDM5B (interacts with) COG3	false
119187	interacts with	KDM5B (interacts with) B3GNT5	false
119188	interacts with	KLF10 (interacts with) FUT11	false
119189	interacts with	KLF4 (interacts with) ACER2	false
119190	interacts with	KLF4 (interacts with) UAP1	false
119191	interacts with	KLF4 (interacts with) HS3ST1	false
119192	interacts with	KLF4 (interacts with) SLC35A1	false
119193	interacts with	KLF4 (interacts with) B3GNT3	false
119194	interacts with	KLF5 (interacts with) B3GNT3	false
119195	interacts with	KLF5 (interacts with) B3GNT5	false
119196	interacts with	KLF5 (interacts with) SLC35A3	false
119197	interacts with	KLF5 (interacts with) GALNT7	false
119198	interacts with	KLF5 (interacts with) GALNT3	false
119199	interacts with	KLF5 (interacts with) GFPT1	false
119200	interacts with	KLF5 (interacts with) GALNT4	false
119201	interacts with	KLF5 (interacts with) UGT1A9	false
119202	interacts with	KLF5 (interacts with) HS3ST1	false
119203	interacts with	KLF5 (interacts with) FUT6	false
119204	interacts with	KLF5 (interacts with) MGAT4B	false
119205	interacts with	KLF5 (interacts with) SLC35F2	false
119206	interacts with	KLF5 (interacts with) C1GALT1	false
119207	interacts with	KLF5 (interacts with) SLC35A1	false
119208	interacts with	KLF5 (interacts with) COG7	false
119209	interacts with	KLF5 (interacts with) C1GALT1C1	false
119210	interacts with	KLF5 (interacts with) GALNT5	false
119211	interacts with	KLF5 (interacts with) GALNT12	false
119212	interacts with	KLF5 (interacts with) SLC35C1	false
119213	interacts with	KLF5 (interacts with) SLC35A2	false
119214	interacts with	KLF5 (interacts with) PIGG	false
119215	interacts with	KLF5 (interacts with) CMAS	false
119216	interacts with	KLF5 (interacts with) SLC35D2	false
119217	interacts with	KLF5 (interacts with) ALG8	false
119218	interacts with	KLF5 (interacts with) UGT8	false
119219	interacts with	LEF1 (interacts with) SULF1	false
119220	interacts with	LEF1 (interacts with) XYLT1	false
119221	interacts with	LEF1 (interacts with) ST8SIA4	false
119222	interacts with	LEF1 (interacts with) CHST11	false
119223	interacts with	LEF1 (interacts with) ST6GAL2	false
119224	interacts with	LEF1 (interacts with) CHSY3	false
119225	interacts with	LEF1 (interacts with) HS3ST3A1	false
119226	interacts with	LEF1 (interacts with) ARSB	false
119227	interacts with	LEF1 (interacts with) ST6GALNAC5	false
119228	interacts with	LEF1 (interacts with) DSE	false
119229	interacts with	LEF1 (interacts with) HS3ST3B1	false
119230	interacts with	LEF1 (interacts with) IDS	false
119231	interacts with	LEF1 (interacts with) ST8SIA2	false
119232	interacts with	LEF1 (interacts with) TPST1	false
119233	interacts with	LEF1 (interacts with) CHST14	false
119234	interacts with	LEF1 (interacts with) EXTL2	false
119235	interacts with	LEF1 (interacts with) SLC35B4	false
119236	interacts with	LEF1 (interacts with) EXT2	false
119237	interacts with	LEF1 (interacts with) B3GALNT1	false
119238	interacts with	LMNA (interacts with) CHPF	false
119239	interacts with	LMO2 (interacts with) MFNG	false
119240	interacts with	LMO2 (interacts with) ST8SIA4	false
119241	interacts with	LMO2 (interacts with) ST6GALNAC3	false
119242	interacts with	LMO2 (interacts with) FUT7	false
119243	interacts with	LMO2 (interacts with) ST3GAL5	false
119244	interacts with	LMO2 (interacts with) RENBP	false
119245	interacts with	LMO2 (interacts with) SMPD1	false
119246	interacts with	LMO2 (interacts with) MGAT4A	false
119247	interacts with	LMTK3 (interacts with) SLC35C2	false
119248	interacts with	LYL1 (interacts with) MFNG	false
119249	interacts with	LYL1 (interacts with) FUT7	false
119250	interacts with	LYL1 (interacts with) MAN2B1	false
119251	interacts with	LYL1 (interacts with) RENBP	false
119252	interacts with	LYL1 (interacts with) CHST12	false
119253	interacts with	LYL1 (interacts with) ST6GALNAC6	false
119254	interacts with	LYL1 (interacts with) ST3GAL2	false
119255	interacts with	LYL1 (interacts with) NAGK	false
119256	interacts with	LYL1 (interacts with) GBGT1	false
119257	interacts with	LYL1 (interacts with) HYAL2	false
119258	interacts with	LYL1 (interacts with) NAGLU	false
119259	interacts with	LYL1 (interacts with) B3GALT6	false
119260	interacts with	LYL1 (interacts with) GALK1	false
119261	interacts with	LYL1 (interacts with) PIGQ	false
119262	interacts with	LYL1 (interacts with) POMT1	false
119263	interacts with	MAF (interacts with) ST8SIA4	false
119264	interacts with	MAF (interacts with) GFPT2	false
119265	interacts with	MAF (interacts with) ST8SIA1	false
119266	interacts with	MAF (interacts with) MAN1A1	false
119267	interacts with	MAF (interacts with) ARSB	false
119268	interacts with	MAF (interacts with) ST6GALNAC5	false
119269	interacts with	MAF (interacts with) B4GALNT1	false
119270	interacts with	MAF (interacts with) ST3GAL2	false
119271	interacts with	MAF (interacts with) DSEL	false
119272	interacts with	MAF (interacts with) B3GNT9	false
119273	interacts with	MAF (interacts with) ST6GALNAC6	false
119274	interacts with	MAF (interacts with) CHSY1	false
119275	interacts with	MAF (interacts with) XYLT1	false
119276	interacts with	MAF (interacts with) NDST1	false
119277	interacts with	MAF (interacts with) EXTL2	false
119278	interacts with	MAF (interacts with) SULF1	false
119279	interacts with	MAF (interacts with) TPST1	false
119280	interacts with	MAF (interacts with) SULF2	false
119281	interacts with	MAF (interacts with) CHST14	false
119282	interacts with	MAF (interacts with) MANBA	false
119283	interacts with	MAF (interacts with) CHST3	false
119284	interacts with	MAF (interacts with) B3GALNT1	false
119285	interacts with	MAFB (interacts with) DSE	false
119286	interacts with	MAFB (interacts with) NPL	false
119287	interacts with	MAFF (interacts with) HS3ST1	false
119288	interacts with	MAFK (interacts with) POFUT2	false
119289	interacts with	MAFK (interacts with) IDUA	false
119290	interacts with	MAFK (interacts with) MOGS	false
119291	interacts with	MAFK (interacts with) CHPF2	false
119292	interacts with	MAFK (interacts with) CHST12	false
119293	interacts with	MAFK (interacts with) B3GAT3	false
119294	interacts with	MAFK (interacts with) PIGQ	false
119295	interacts with	MAFK (interacts with) ARSA	false
119296	interacts with	MAFK (interacts with) GPAA1	false
119297	interacts with	MAFK (interacts with) RFNG	false
119298	interacts with	MAX (interacts with) PIGH	false
119299	interacts with	MBD3 (interacts with) DPM2	false
119300	interacts with	MBD3 (interacts with) PIGQ	false
119301	interacts with	MBD3 (interacts with) B3GAT3	false
119302	interacts with	MBD3 (interacts with) RFNG	false
119303	interacts with	MBD3 (interacts with) B4GALT7	false
119304	interacts with	MBD3 (interacts with) DPM3	false
119305	interacts with	MBD3 (interacts with) GALK1	false
119306	interacts with	MBD3 (interacts with) GPAA1	false
119307	interacts with	MBD3 (interacts with) IDUA	false
119308	interacts with	MBD3 (interacts with) CHPF	false
119309	interacts with	MBD3 (interacts with) ALG12	false
119310	interacts with	MBD3 (interacts with) FKRP	false
119311	interacts with	MBD3 (interacts with) B3GALT6	false
119312	interacts with	MBD3 (interacts with) HYAL2	false
119313	interacts with	MBD3 (interacts with) NAGLU	false
119314	interacts with	MBD3 (interacts with) MAN2B1	false
119315	interacts with	MBD3 (interacts with) ARSA	false
119316	interacts with	MBD3 (interacts with) B3GNT8	false
119317	interacts with	MECOM (interacts with) ST6GALNAC1	false
119318	interacts with	MECOM (interacts with) GALNT7	false
119319	interacts with	MECOM (interacts with) GALNT12	false
119320	interacts with	MECOM (interacts with) GCNT1	false
119321	interacts with	MECOM (interacts with) SLC35A1	false
119322	interacts with	MECOM (interacts with) SLC35C1	false
119323	interacts with	MECP2 (interacts with) IDS	false
119324	interacts with	MECP2 (interacts with) NDST2	false
119325	interacts with	MECP2 (interacts with) NDST1	false
119326	interacts with	MECP2 (interacts with) OGT	false
119327	interacts with	MECP2 (interacts with) CTNS	false
119328	interacts with	MED1 (interacts with) FUT11	false
119329	interacts with	MED1 (interacts with) GANAB	false
119330	interacts with	MEF2A (interacts with) FUT11	false
119331	interacts with	MEF2A (interacts with) MGAT5	false
119332	interacts with	MEF2A (interacts with) CSGALNACT2	false
119333	interacts with	MEF2A (interacts with) RTF1	false
119334	interacts with	MEF2A (interacts with) PIGK	false
119335	interacts with	MEF2A (interacts with) MAN1A1	false
119336	interacts with	MEF2A (interacts with) UGCG	false
119337	interacts with	MEF2A (interacts with) MAN2A1	false
119338	interacts with	MEF2A (interacts with) GLCE	false
119339	interacts with	MEF2A (interacts with) IDS	false
119340	interacts with	MEF2A (interacts with) DSE	false
119341	interacts with	MEF2A (interacts with) GALNT10	false
119342	interacts with	MEF2A (interacts with) XYLT1	false
119343	interacts with	MEF2A (interacts with) COG5	false
119344	interacts with	MEF2A (interacts with) PIGN	false
119345	interacts with	MEF2A (interacts with) UGGT2	false
119346	interacts with	MEF2A (interacts with) GANAB	false
119347	interacts with	MEF2A (interacts with) ALG10B	false
119348	interacts with	MEF2A (interacts with) SLC35B4	false
119349	interacts with	MEF2A (interacts with) NEU3	false
119350	interacts with	MEF2A (interacts with) EXTL2	false
119351	interacts with	MEF2A (interacts with) NDST1	false
119352	interacts with	MEF2B (interacts with) CHST12	false
119353	interacts with	MEF2B (interacts with) IDUA	false
119354	interacts with	MEF2B (interacts with) GALK1	false
119355	interacts with	MEF2C (interacts with) MAN1A1	false
119356	interacts with	MEF2C (interacts with) MAN1C1	false
119357	interacts with	MEF2C (interacts with) ST6GALNAC3	false
119358	interacts with	MEF2C (interacts with) ARSB	false
119359	interacts with	MEF2C (interacts with) SLC35F1	false
119360	interacts with	MEF2C (interacts with) ST8SIA1	false
119361	interacts with	MEF2C (interacts with) DSEL	false
119362	interacts with	MEF2C (interacts with) DSE	false
119363	interacts with	MEF2C (interacts with) NDST1	false
119364	interacts with	MEF2C (interacts with) EXTL2	false
119365	interacts with	MEF2C (interacts with) PIGK	false
119366	interacts with	MEF2C (interacts with) MGAT4A	false
119367	interacts with	MEF2C (interacts with) GFPT2	false
119368	interacts with	MEF2C (interacts with) CHST10	false
119369	interacts with	MEF2C (interacts with) SLC35B4	false
119370	interacts with	MEF2C (interacts with) ASAH1	false
119371	interacts with	MEF2D (interacts with) B4GALT3	false
119372	interacts with	MEF2D (interacts with) FUT11	false
119373	interacts with	MEF2D (interacts with) UAP1	false
119374	interacts with	MEIS1 (interacts with) CHST9	false
119375	interacts with	MEIS1 (interacts with) HS6ST1	false
119376	interacts with	MEIS1 (interacts with) ST8SIA3	false
119377	interacts with	MEIS1 (interacts with) CHST4	false
119378	interacts with	MEIS3 (interacts with) ST3GAL2	false
119379	interacts with	MEIS3 (interacts with) ST8SIA1	false
119380	interacts with	MRE11A (interacts with) NEU3	false
119381	interacts with	MRE11A (interacts with) GANAB	false
119382	interacts with	MRE11A (interacts with) PIGO	false
119383	interacts with	MSX1 (interacts with) ST6GALNAC6	false
119384	interacts with	MXD1 (interacts with) TSTA3	false
119385	interacts with	MXD3 (interacts with) MOGS	false
119386	interacts with	MYH11 (interacts with) CHSY3	false
119387	interacts with	MYH11 (interacts with) EXTL2	false
119388	interacts with	MYH11 (interacts with) SLC35B4	false
119389	interacts with	MZF1 (interacts with) DPM3	false
119390	interacts with	MZF1 (interacts with) GPAA1	false
119391	interacts with	NCOR1 (interacts with) SLC35D1	false
119392	interacts with	NCOR2 (interacts with) POFUT2	false
119393	interacts with	NCOR2 (interacts with) IDUA	false
119394	interacts with	NCOR2 (interacts with) CHPF2	false
119395	interacts with	NCOR2 (interacts with) RFNG	false
119396	interacts with	NCOR2 (interacts with) CHPF	false
119397	interacts with	NCOR2 (interacts with) CHST12	false
119398	interacts with	NFAT5 (interacts with) COG5	false
119399	interacts with	NFATC1 (interacts with) FUT7	false
119400	interacts with	NFATC1 (interacts with) CHST2	false
119401	interacts with	NFATC1 (interacts with) SMPD1	false
119402	interacts with	NFATC1 (interacts with) NDST1	false
119403	interacts with	NFATC1 (interacts with) HAS1	false
119404	interacts with	NFATC1 (interacts with) ST3GAL2	false
119405	interacts with	NFATC1 (interacts with) ST3GAL3	false
119406	interacts with	NFATC1 (interacts with) ARSB	false
119407	interacts with	NFATC1 (interacts with) NDST2	false
119408	interacts with	NFYB (interacts with) CSGALNACT2	false
119409	interacts with	NFYB (interacts with) ST6GALNAC5	false
119410	interacts with	NFYB (interacts with) ARSB	false
119411	interacts with	NFYB (interacts with) CHSY3	false
119412	interacts with	NFYB (interacts with) PIGK	false
119413	interacts with	NFYB (interacts with) DSEL	false
119414	interacts with	NFYB (interacts with) CSGALNACT1	false
119415	interacts with	NFYB (interacts with) GALNT13	false
119416	interacts with	NIPBL (interacts with) NEU3	false
119417	interacts with	NIPBL (interacts with) UGGT1	false
119418	interacts with	NIPBL (interacts with) FUT11	false
119419	interacts with	NIPBL (interacts with) MGAT5	false
119420	interacts with	NIPBL (interacts with) RTF1	false
119421	interacts with	NIPBL (interacts with) SLC35A5	false
119422	interacts with	NIPBL (interacts with) FKTN	false
119423	interacts with	NIPBL (interacts with) MAN1A2	false
119424	interacts with	NIPBL (interacts with) STT3B	false
119425	interacts with	NIPBL (interacts with) GANAB	false
119426	interacts with	NIPBL (interacts with) UGCG	false
119427	interacts with	NIPBL (interacts with) PIGM	false
119428	interacts with	NIPBL (interacts with) PIGN	false
119429	interacts with	NIPBL (interacts with) GFPT1	false
119430	interacts with	NIPBL (interacts with) GALNT7	false
119431	interacts with	NOTCH1 (interacts with) ST3GAL2	false
119432	interacts with	NOTCH1 (interacts with) NDST2	false
119433	interacts with	NOTCH1 (interacts with) NDST1	false
119434	interacts with	NOTCH1 (interacts with) CHST12	false
119435	interacts with	NOTCH1 (interacts with) CTNS	false
119436	interacts with	NOTCH1 (interacts with) CHST7	false
119437	interacts with	NPAT (interacts with) GANAB	false
119438	interacts with	NPAT (interacts with) RTF1	false
119439	interacts with	NR1D1 (interacts with) GALE	false
119440	interacts with	NR1H2 (interacts with) RFNG	false
119441	interacts with	NR1H2 (interacts with) DPM3	false
119442	interacts with	NR1H2 (interacts with) PIGQ	false
119443	interacts with	NR1H2 (interacts with) IDUA	false
119444	interacts with	NR1H2 (interacts with) DPM2	false
119445	interacts with	NR1H2 (interacts with) B3GAT3	false
119446	interacts with	NR1H2 (interacts with) CHST12	false
119447	interacts with	NR1H2 (interacts with) GALK1	false
119448	interacts with	NR1H2 (interacts with) B3GALT4	false
119449	interacts with	NR1H2 (interacts with) FKRP	false
119450	interacts with	NR1H2 (interacts with) B4GALT7	false
119451	interacts with	NR1H2 (interacts with) B3GNT8	false
119452	interacts with	NR1H2 (interacts with) ARSA	false
119453	interacts with	NR1H2 (interacts with) GPAA1	false
119454	interacts with	NR1H2 (interacts with) XYLT2	false
119455	interacts with	NR1H2 (interacts with) B3GALT6	false
119456	interacts with	NR1H2 (interacts with) ALG3	false
119457	interacts with	NR1H3 (interacts with) TSTA3	false
119458	interacts with	NR2C2 (interacts with) STT3B	false
119459	interacts with	NR2C2 (interacts with) FKTN	false
119460	interacts with	NR2C2 (interacts with) OGT	false
119461	interacts with	NR2C2 (interacts with) ALG10B	false
119462	interacts with	NR2C2 (interacts with) FUT11	false
119463	interacts with	NR2C2 (interacts with) FAM20B	false
119464	interacts with	NR2C2 (interacts with) COG3	false
119465	interacts with	NR2C2 (interacts with) COG5	false
119466	interacts with	NR2C2 (interacts with) SLC35D1	false
119467	interacts with	NR2C2 (interacts with) SLC35B4	false
119468	interacts with	NR2C2 (interacts with) UGGT1	false
119469	interacts with	NR2F2 (interacts with) CSGALNACT2	false
119470	interacts with	NR2F2 (interacts with) FUT11	false
119471	interacts with	NR2F2 (interacts with) SULT1C4	false
119472	interacts with	NR2F2 (interacts with) CSGALNACT1	false
119473	interacts with	NR2F2 (interacts with) DSEL	false
119474	interacts with	NR2F2 (interacts with) ARSB	false
119475	interacts with	NR2F2 (interacts with) ST6GALNAC3	false
119476	interacts with	NR2F2 (interacts with) MAN2A2	false
119477	interacts with	NR2F2 (interacts with) LIPA	false
119478	interacts with	NR2F2 (interacts with) NDST2	false
119479	interacts with	NR2F2 (interacts with) MAN1A2	false
119480	interacts with	NR2F2 (interacts with) GALNT11	false
119481	interacts with	NR2F2 (interacts with) SLC35D1	false
119482	interacts with	NR2F2 (interacts with) B3GALT2	false
119483	interacts with	NR2F2 (interacts with) SLC35B3	false
119484	interacts with	NR2F6 (interacts with) TSTA3	false
119485	interacts with	NR4A1 (interacts with) HAS1	false
119486	interacts with	NRF1 (interacts with) NDST2	false
119487	interacts with	NRF1 (interacts with) MAN2A2	false
119488	interacts with	NRF1 (interacts with) OGT	false
119489	interacts with	NRF1 (interacts with) MFNG	false
119490	interacts with	OVOL2 (interacts with) COG2	false
119491	interacts with	OVOL2 (interacts with) FUT3	false
119492	interacts with	PAX6 (interacts with) HS6ST3	false
119493	interacts with	PAX6 (interacts with) SLC35F4	false
119494	interacts with	PAX6 (interacts with) ST8SIA3	false
119495	interacts with	PAX6 (interacts with) CHST9	false
119496	interacts with	PAX6 (interacts with) CHST8	false
119497	interacts with	PAX6 (interacts with) SLC35F3	false
119498	interacts with	PAX6 (interacts with) MGAT4A	false
119499	interacts with	PBX1 (interacts with) MAN1A2	false
119500	interacts with	PBX1 (interacts with) GCNT4	false
119501	interacts with	PBX1 (interacts with) NEU3	false
119502	interacts with	PBX1 (interacts with) MAN1A1	false
119503	interacts with	PBX1 (interacts with) SLC35A5	false
119504	interacts with	PBX1 (interacts with) MAN2A1	false
119505	interacts with	PBX1 (interacts with) PIGM	false
119506	interacts with	PBX1 (interacts with) FPGT	false
119507	interacts with	PBX1 (interacts with) ASAH1	false
119508	interacts with	PBX1 (interacts with) GALNT11	false
119509	interacts with	PBX1 (interacts with) MGAT4A	false
119510	interacts with	PBX1 (interacts with) DSEL	false
119511	interacts with	PBX1 (interacts with) UGCG	false
119512	interacts with	PBX1 (interacts with) LAMP2	false
119513	interacts with	PBX1 (interacts with) PAPSS2	false
119514	interacts with	PBX3 (interacts with) MGAT4A	false
119515	interacts with	PBX3 (interacts with) DSEL	false
119516	interacts with	PBX3 (interacts with) ARSB	false
119517	interacts with	PBX3 (interacts with) SULT1C4	false
119518	interacts with	PBX3 (interacts with) SLC35F1	false
119519	interacts with	PBX3 (interacts with) PAPSS2	false
119520	interacts with	PBX3 (interacts with) CHST10	false
119521	interacts with	PBX3 (interacts with) HS6ST3	false
119522	interacts with	PBX3 (interacts with) CHST9	false
119523	interacts with	PBX3 (interacts with) TPST1	false
119524	interacts with	PBX3 (interacts with) ST6GALNAC3	false
119525	interacts with	PBX3 (interacts with) EXTL2	false
119526	interacts with	PBX3 (interacts with) CHSY3	false
119527	interacts with	PBX3 (interacts with) EXTL3	false
119528	interacts with	PCGF1 (interacts with) RFNG	false
119529	interacts with	PCGF1 (interacts with) GALE	false
119530	interacts with	PDX1 (interacts with) GCNT4	false
119531	interacts with	PDX1 (interacts with) PIGH	false
119532	interacts with	PDX1 (interacts with) GALNT4	false
119533	interacts with	PHF20 (interacts with) POFUT1	false
119534	interacts with	PHF20 (interacts with) UGCG	false
119535	interacts with	PHF20 (interacts with) FUT11	false
119536	interacts with	PIAS1 (interacts with) MGAT5	false
119537	interacts with	PIAS1 (interacts with) ACER2	false
119538	interacts with	PIAS1 (interacts with) UGCG	false
119539	interacts with	PIAS1 (interacts with) FUT11	false
119540	interacts with	PIAS1 (interacts with) ALG10	false
119541	interacts with	PIAS1 (interacts with) SLC35A3	false
119542	interacts with	PIAS1 (interacts with) FKTN	false
119543	interacts with	PIAS1 (interacts with) FUT10	false
119544	interacts with	PIAS1 (interacts with) COG5	false
119545	interacts with	PIAS1 (interacts with) SLC35A5	false
119546	interacts with	PIAS1 (interacts with) COG6	false
119547	interacts with	PIAS1 (interacts with) SLC35F5	false
119548	interacts with	PIAS1 (interacts with) GANAB	false
119549	interacts with	PIAS1 (interacts with) MGAT4A	false
119550	interacts with	PIAS1 (interacts with) ALG10B	false
119551	interacts with	PIAS1 (interacts with) B3GALT5	false
119552	interacts with	PIAS1 (interacts with) POFUT1	false
119553	interacts with	PIAS1 (interacts with) PAPSS2	false
119554	interacts with	PIAS1 (interacts with) CTBS	false
119555	interacts with	PIAS1 (interacts with) ASAH1	false
119556	interacts with	PIAS1 (interacts with) XYLT1	false
119557	interacts with	PIAS4 (interacts with) FUT6	false
119558	interacts with	PML (interacts with) ALG3	false
119559	interacts with	PML (interacts with) IDUA	false
119560	interacts with	PML (interacts with) B4GALT7	false
119561	interacts with	PML (interacts with) MOGS	false
119562	interacts with	PML (interacts with) B3GALT4	false
119563	interacts with	PML (interacts with) MGAT4B	false
119564	interacts with	PML (interacts with) SLC35A2	false
119565	interacts with	POLR2B (interacts with) MAN1A2	false
119566	interacts with	POLR2B (interacts with) MAN2A1	false
119567	interacts with	POLR2B (interacts with) RTF1	false
119568	interacts with	POLR2B (interacts with) GANAB	false
119569	interacts with	POLR2B (interacts with) UGGT1	false
119570	interacts with	POLR2B (interacts with) FUT11	false
119571	interacts with	POLR2B (interacts with) FKTN	false
119572	interacts with	POLR2B (interacts with) SLC35D1	false
119573	interacts with	POLR2B (interacts with) SLC35E3	false
119574	interacts with	POLR2B (interacts with) UGDH	false
119575	interacts with	POLR2B (interacts with) MGAT2	false
119576	interacts with	POLR2B (interacts with) SLC35F5	false
119577	interacts with	POLR2B (interacts with) PAPSS1	false
119578	interacts with	POLR2B (interacts with) PIGM	false
119579	interacts with	POLR2B (interacts with) ASAH1	false
119580	interacts with	POLR2B (interacts with) CTBS	false
119581	interacts with	POLR2B (interacts with) SLC17A5	false
119582	interacts with	POLR3GL (interacts with) PIGC	false
119583	interacts with	POLR3GL (interacts with) COG2	false
119584	interacts with	PPARA (interacts with) STT3B	false
119585	interacts with	PPARA (interacts with) MAN2A1	false
119586	interacts with	PPARA (interacts with) GFPT1	false
119587	interacts with	PPARG (interacts with) SLC35A3	false
119588	interacts with	PPARG (interacts with) B3GNT3	false
119589	interacts with	PPARG (interacts with) MGAT4B	false
119590	interacts with	PPARG (interacts with) GALNT12	false
119591	interacts with	PRDM1 (interacts with) CSGALNACT2	false
119592	interacts with	PRDM1 (interacts with) ST8SIA4	false
119593	interacts with	PRDM1 (interacts with) DSE	false
119594	interacts with	PRDM1 (interacts with) B4GALNT1	false
119595	interacts with	PRDM1 (interacts with) CHSY1	false
119596	interacts with	PRDM1 (interacts with) CHSY3	false
119597	interacts with	PRDM1 (interacts with) ST6GALNAC5	false
119598	interacts with	PRDM1 (interacts with) XYLT1	false
119599	interacts with	PRDM1 (interacts with) TPST1	false
119600	interacts with	PRDM1 (interacts with) FUT11	false
119601	interacts with	PRDM1 (interacts with) CHST14	false
119602	interacts with	PRDM1 (interacts with) ST3GAL2	false
119603	interacts with	RARA (interacts with) CHST12	false
119604	interacts with	RARA (interacts with) POFUT2	false
119605	interacts with	RARA (interacts with) RFNG	false
119606	interacts with	RARA (interacts with) IDUA	false
119607	interacts with	RARG (interacts with) B3GNT3	false
119608	interacts with	RARG (interacts with) MGAT4B	false
119609	interacts with	RARG (interacts with) COG4	false
119610	interacts with	RARG (interacts with) MOGS	false
119611	interacts with	RARG (interacts with) COG7	false
119612	interacts with	RARG (interacts with) ALG3	false
119613	interacts with	RB1 (interacts with) COG6	false
119614	interacts with	RB1 (interacts with) COG3	false
119615	interacts with	RB1 (interacts with) STT3B	false
119616	interacts with	RB1 (interacts with) SLC35A5	false
119617	interacts with	RB1 (interacts with) ALG10B	false
119618	interacts with	RB1 (interacts with) ALG10	false
119619	interacts with	RB1 (interacts with) MAN2A1	false
119620	interacts with	RB1 (interacts with) COG5	false
119621	interacts with	RB1 (interacts with) PIGK	false
119622	interacts with	RB1 (interacts with) SLC35F5	false
119623	interacts with	RB1 (interacts with) NEU3	false
119624	interacts with	RB1 (interacts with) UGGT1	false
119625	interacts with	RB1 (interacts with) FPGT	false
119626	interacts with	RB1 (interacts with) UGCG	false
119627	interacts with	RB1 (interacts with) FKTN	false
119628	interacts with	RB1 (interacts with) RTF1	false
119629	interacts with	RB1 (interacts with) ASAH1	false
119630	interacts with	RB1 (interacts with) POFUT1	false
119631	interacts with	RB1 (interacts with) GLB1	false
119632	interacts with	RB1 (interacts with) FAM20B	false
119633	interacts with	RB1 (interacts with) PIGM	false
119634	interacts with	RB1 (interacts with) MAN1A1	false
119635	interacts with	RBCK1 (interacts with) MOGS	false
119636	interacts with	RBL2 (interacts with) ALG10B	false
119637	interacts with	RBL2 (interacts with) SLC35A5	false
119638	interacts with	RBL2 (interacts with) ALG10	false
119639	interacts with	RBL2 (interacts with) STT3B	false
119640	interacts with	RBL2 (interacts with) MAN2A1	false
119641	interacts with	RBL2 (interacts with) FPGT	false
119642	interacts with	RBL2 (interacts with) PIGN	false
119643	interacts with	RBL2 (interacts with) COG6	false
119644	interacts with	RBL2 (interacts with) SLC35D1	false
119645	interacts with	RBL2 (interacts with) PIGK	false
119646	interacts with	RBL2 (interacts with) SLC35E3	false
119647	interacts with	RBL2 (interacts with) UGGT1	false
119648	interacts with	RBL2 (interacts with) COG5	false
119649	interacts with	RBL2 (interacts with) PIGM	false
119650	interacts with	RBL2 (interacts with) GFPT1	false
119651	interacts with	RBL2 (interacts with) UGCG	false
119652	interacts with	RBL2 (interacts with) ASAH1	false
119653	interacts with	RBL2 (interacts with) SLC35B4	false
119654	interacts with	RBL2 (interacts with) MAN1A1	false
119655	interacts with	RBL2 (interacts with) CTBS	false
119656	interacts with	RBPJ (interacts with) UGP2	false
119657	interacts with	RBPJ (interacts with) CSGALNACT2	false
119658	interacts with	RCOR1 (interacts with) SLC35A3	false
119659	interacts with	RCOR1 (interacts with) PIGA	false
119660	interacts with	RCOR1 (interacts with) GALNT7	false
119661	interacts with	RCOR1 (interacts with) B4GALT5	false
119662	interacts with	RCOR1 (interacts with) GFPT1	false
119663	interacts with	RCOR1 (interacts with) COG3	false
119664	interacts with	RCOR1 (interacts with) B3GNT3	false
119665	interacts with	RELA (interacts with) MOGS	false
119666	interacts with	RELA (interacts with) MGAT4B	false
119667	interacts with	RELA (interacts with) ALG3	false
119668	interacts with	RELA (interacts with) B3GNT3	false
119669	interacts with	RELA (interacts with) SLC35C2	false
119670	interacts with	RELA (interacts with) GALE	false
119671	interacts with	RELA (interacts with) IDUA	false
119672	interacts with	RELA (interacts with) B3GALT4	false
119673	interacts with	RELA (interacts with) SLC35A2	false
119674	interacts with	REST (interacts with) FUT11	false
119675	interacts with	RFX1 (interacts with) GALK1	false
119676	interacts with	RFX1 (interacts with) GALT	false
119677	interacts with	RING1 (interacts with) RFNG	false
119678	interacts with	RING1 (interacts with) IDUA	false
119679	interacts with	RING1 (interacts with) B4GALT7	false
119680	interacts with	RING1 (interacts with) B3GALT6	false
119681	interacts with	RING1 (interacts with) POFUT2	false
119682	interacts with	RING1 (interacts with) DPM3	false
119683	interacts with	RING1 (interacts with) CHST12	false
119684	interacts with	RING1 (interacts with) NAGLU	false
119685	interacts with	RING1 (interacts with) B3GALT4	false
119686	interacts with	RING1 (interacts with) FKRP	false
119687	interacts with	RING1 (interacts with) GALK1	false
119688	interacts with	RING1 (interacts with) GMPPA	false
119689	interacts with	RING1 (interacts with) ALG12	false
119690	interacts with	RNF2 (interacts with) FAM20B	false
119691	interacts with	RNF2 (interacts with) SLC35F5	false
119692	interacts with	RNF2 (interacts with) COG5	false
119693	interacts with	RNF2 (interacts with) PIGM	false
119694	interacts with	RNF2 (interacts with) MGAT2	false
119695	interacts with	RNF2 (interacts with) COG6	false
119696	interacts with	RNF2 (interacts with) C1GALT1	false
119697	interacts with	RORA (interacts with) NDST1	false
119698	interacts with	RORA (interacts with) DSE	false
119699	interacts with	RORA (interacts with) PAPSS2	false
119700	interacts with	RUNX1 (interacts with) CHST15	false
119701	interacts with	RUNX1 (interacts with) CHSY1	false
119702	interacts with	RUNX1 (interacts with) SULF1	false
119703	interacts with	RUNX1 (interacts with) DSE	false
119704	interacts with	RUNX1 (interacts with) CHSY3	false
119705	interacts with	RUNX1 (interacts with) SULF2	false
119706	interacts with	RUNX1 (interacts with) B4GALNT1	false
119707	interacts with	RUNX1 (interacts with) NDST1	false
119708	interacts with	RUNX1 (interacts with) ARSB	false
119709	interacts with	RUNX1 (interacts with) B3GNT9	false
119710	interacts with	RUNX1 (interacts with) GALNS	false
119711	interacts with	RUNX1 (interacts with) ST8SIA2	false
119712	interacts with	RUNX1 (interacts with) B3GALNT1	false
119713	interacts with	RUNX1 (interacts with) POFUT1	false
119714	interacts with	RUNX1 (interacts with) SLC35D1	false
119715	interacts with	RUNX1 (interacts with) CHST14	false
119716	interacts with	RUNX1 (interacts with) EXTL2	false
119717	interacts with	RUNX1 (interacts with) HS3ST3B1	false
119718	interacts with	RUNX1 (interacts with) MANBA	false
119719	interacts with	RUNX2 (interacts with) CHST15	false
119720	interacts with	RUNX2 (interacts with) SULF2	false
119721	interacts with	RUNX2 (interacts with) TPST1	false
119722	interacts with	RUNX2 (interacts with) B3GNT9	false
119723	interacts with	RXRG (interacts with) CHST8	false
119724	interacts with	RXRG (interacts with) HS6ST3	false
119725	interacts with	RXRG (interacts with) SLC35F4	false
119726	interacts with	RXRG (interacts with) CHST9	false
119727	interacts with	RXRG (interacts with) ST8SIA3	false
119728	interacts with	RXRG (interacts with) SLC35F3	false
119729	interacts with	RXRG (interacts with) PAPSS2	false
119730	interacts with	RXRG (interacts with) CHST10	false
119731	interacts with	RYBP (interacts with) STT3B	false
119732	interacts with	RYBP (interacts with) MAN2A1	false
119733	interacts with	RYBP (interacts with) GALNT1	false
119734	interacts with	RYBP (interacts with) UGDH	false
119735	interacts with	RYBP (interacts with) PAPSS2	false
119736	interacts with	RYBP (interacts with) UGGT2	false
119737	interacts with	RYBP (interacts with) ASAH1	false
119738	interacts with	RYBP (interacts with) UGP2	false
119739	interacts with	RYBP (interacts with) MAN1A1	false
119740	interacts with	RYBP (interacts with) DSE	false
119741	interacts with	RYBP (interacts with) B3GALNT1	false
119742	interacts with	RYBP (interacts with) HS3ST3B1	false
119743	interacts with	SFMBT1 (interacts with) STT3B	false
119744	interacts with	SIRT6 (interacts with) DPM2	false
119745	interacts with	SIRT6 (interacts with) B3GAT3	false
119746	interacts with	SIRT6 (interacts with) RFNG	false
119747	interacts with	SIRT6 (interacts with) PIGQ	false
119748	interacts with	SIRT6 (interacts with) TSTA3	false
119749	interacts with	SIRT6 (interacts with) B4GALT7	false
119750	interacts with	SIRT6 (interacts with) ALG3	false
119751	interacts with	SIRT6 (interacts with) IDUA	false
119752	interacts with	SIRT6 (interacts with) MOGS	false
119753	interacts with	SIRT6 (interacts with) GALE	false
119754	interacts with	SIRT6 (interacts with) GPAA1	false
119755	interacts with	SIRT6 (interacts with) B3GALT4	false
119756	interacts with	SIRT6 (interacts with) B3GNT3	false
119757	interacts with	SIRT6 (interacts with) B3GNT8	false
119758	interacts with	SIRT6 (interacts with) GALT	false
119759	interacts with	SIX5 (interacts with) PIGQ	false
119760	interacts with	SIX5 (interacts with) B3GALT6	false
119761	interacts with	SIX5 (interacts with) RFNG	false
119762	interacts with	SIX5 (interacts with) MOGS	false
119763	interacts with	SIX5 (interacts with) B3GAT3	false
119764	interacts with	SIX5 (interacts with) B4GALT7	false
119765	interacts with	SIX5 (interacts with) SLC35C2	false
119766	interacts with	SIX5 (interacts with) GPAA1	false
119767	interacts with	SIX5 (interacts with) GALK1	false
119768	interacts with	SIX5 (interacts with) POMT1	false
119769	interacts with	SIX5 (interacts with) CHPF	false
119770	interacts with	SIX5 (interacts with) B3GNT8	false
119771	interacts with	SMAD1 (interacts with) STT3B	false
119772	interacts with	SMAD1 (interacts with) PIGK	false
119773	interacts with	SMAD1 (interacts with) UGCG	false
119774	interacts with	SMAD1 (interacts with) GALNT1	false
119775	interacts with	SMAD1 (interacts with) MAN1A2	false
119776	interacts with	SMAD1 (interacts with) POFUT1	false
119777	interacts with	SMAD1 (interacts with) FUT11	false
119778	interacts with	SMAD1 (interacts with) SLC35B4	false
119779	interacts with	SMAD1 (interacts with) FPGT	false
119780	interacts with	SMAD1 (interacts with) ASAH1	false
119781	interacts with	SMAD1 (interacts with) CSGALNACT2	false
119782	interacts with	SMAD1 (interacts with) ST8SIA4	false
119783	interacts with	SMAD1 (interacts with) SLC35E3	false
119784	interacts with	SMAD1 (interacts with) FUT10	false
119785	interacts with	SMAD3 (interacts with) HK1	false
119786	interacts with	SMAD3 (interacts with) B4GALT5	false
119787	interacts with	SMAD3 (interacts with) B4GALNT3	false
119788	interacts with	SMAD3 (interacts with) GALNT7	false
119789	interacts with	SMAD3 (interacts with) B3GALT5	false
119790	interacts with	SMAD3 (interacts with) B3GNT3	false
119791	interacts with	SMAD3 (interacts with) HS3ST1	false
119792	interacts with	SMAD3 (interacts with) C1GALT1C1	false
119793	interacts with	SMAD3 (interacts with) MGAT4B	false
119794	interacts with	SMAD3 (interacts with) SLC35F2	false
119795	interacts with	SNAPC1 (interacts with) DPM1	false
119796	interacts with	SNAPC1 (interacts with) UGGT2	false
119797	interacts with	SNAPC1 (interacts with) UGDH	false
119798	interacts with	SOX4 (interacts with) GNB1	false
119799	interacts with	SOX4 (interacts with) UXS1	false
119800	interacts with	SOX9 (interacts with) COG7	false
119801	interacts with	SOX9 (interacts with) B4GALNT3	false
119802	interacts with	SOX9 (interacts with) GALNT3	false
119803	interacts with	SOX9 (interacts with) DPAGT1	false
119804	interacts with	SOX9 (interacts with) C1GALT1	false
119805	interacts with	SOX9 (interacts with) SLC35D2	false
119806	interacts with	SOX9 (interacts with) GAL3ST1	false
119807	interacts with	SOX9 (interacts with) COG3	false
119808	interacts with	SOX9 (interacts with) SLC35A3	false
119809	interacts with	SPDEF (interacts with) FUT2	false
119810	interacts with	SPDEF (interacts with) SLC35A1	false
119811	interacts with	SPIB (interacts with) FUT7	false
119812	interacts with	SRC (interacts with) SLC35C2	false
119813	interacts with	SRC (interacts with) MGAT4B	false
119814	interacts with	SRC (interacts with) MOGS	false
119815	interacts with	SRC (interacts with) SLC35A2	false
119816	interacts with	SRC (interacts with) SLC35C1	false
119817	interacts with	SRC (interacts with) GALE	false
119818	interacts with	SRC (interacts with) B4GALT4	false
119819	interacts with	SRC (interacts with) PIGG	false
119820	interacts with	SRC (interacts with) ALG3	false
119821	interacts with	SRC (interacts with) ST6GALNAC1	false
119822	interacts with	SRC (interacts with) COG7	false
119823	interacts with	SRC (interacts with) FUT2	false
119824	interacts with	SRC (interacts with) LFNG	false
119825	interacts with	SRC (interacts with) GALNT4	false
119826	interacts with	SRC (interacts with) SLC35D2	false
119827	interacts with	SRC (interacts with) SLC35A1	false
119828	interacts with	SRC (interacts with) PMM2	false
119829	interacts with	SRC (interacts with) GALNT12	false
119830	interacts with	SRC (interacts with) GFPT1	false
119831	interacts with	SRC (interacts with) SLC35A3	false
119832	interacts with	SRC (interacts with) GMDS	false
119833	interacts with	SRC (interacts with) C1GALT1	false
119834	interacts with	SRC (interacts with) NANS	false
119835	interacts with	SRC (interacts with) HK1	false
119836	interacts with	SRCAP (interacts with) COG7	false
119837	interacts with	SRCAP (interacts with) PIGG	false
119838	interacts with	SREBF2 (interacts with) MGAT3	false
119839	interacts with	SRF (interacts with) NDST1	false
119840	interacts with	SRF (interacts with) ST3GAL3	false
119841	interacts with	STAG1 (interacts with) IDS	false
119842	interacts with	STAT2 (interacts with) DSE	false
119843	interacts with	STAT2 (interacts with) POFUT2	false
119844	interacts with	STAT2 (interacts with) GBGT1	false
119845	interacts with	STAT2 (interacts with) SULF2	false
119846	interacts with	STAT2 (interacts with) ST3GAL2	false
119847	interacts with	STAT3 (interacts with) MGAT5	false
119848	interacts with	STAT3 (interacts with) NEU3	false
119849	interacts with	STAT3 (interacts with) MAN2A1	false
119850	interacts with	STAT3 (interacts with) STT3B	false
119851	interacts with	STAT3 (interacts with) MAN1A2	false
119852	interacts with	STAT3 (interacts with) MAN1A1	false
119853	interacts with	STAT3 (interacts with) CHSY1	false
119854	interacts with	STAT3 (interacts with) ST8SIA4	false
119855	interacts with	STAT3 (interacts with) MGAT4A	false
119856	interacts with	STAT3 (interacts with) ASAH1	false
119857	interacts with	STAT3 (interacts with) CSGALNACT2	false
119858	interacts with	STAT3 (interacts with) PIGN	false
119859	interacts with	STAT3 (interacts with) MAN1C1	false
119860	interacts with	STAT3 (interacts with) CSGALNACT1	false
119861	interacts with	STAT3 (interacts with) POFUT1	false
119862	interacts with	STAT3 (interacts with) ARSB	false
119863	interacts with	STAT3 (interacts with) NDST1	false
119864	interacts with	STAT3 (interacts with) EXTL3	false
119865	interacts with	STAT3 (interacts with) PIGK	false
119866	interacts with	STAT3 (interacts with) GALNT1	false
119867	interacts with	STAT3 (interacts with) FKTN	false
119868	interacts with	STAT3 (interacts with) UGP2	false
119869	interacts with	STAT3 (interacts with) DSEL	false
119870	interacts with	STAT3 (interacts with) GFPT2	false
119871	interacts with	STAT3 (interacts with) CTBS	false
119872	interacts with	STAT4 (interacts with) FUT7	false
119873	interacts with	STAT4 (interacts with) ST8SIA4	false
119874	interacts with	STAT4 (interacts with) GBGT1	false
119875	interacts with	STAT4 (interacts with) MGAT4A	false
119876	interacts with	STAT4 (interacts with) GM2A	false
119877	interacts with	STAT4 (interacts with) ST8SIA1	false
119878	interacts with	STAT4 (interacts with) NPL	false
119879	interacts with	STAT4 (interacts with) RENBP	false
119880	interacts with	STAT4 (interacts with) NDST2	false
119881	interacts with	STAT4 (interacts with) ST3GAL5	false
119882	interacts with	STAT4 (interacts with) ARSB	false
119883	interacts with	STAT4 (interacts with) MAN1C1	false
119884	interacts with	STAT4 (interacts with) ST6GALNAC3	false
119885	interacts with	STAT4 (interacts with) PAPSS2	false
119886	interacts with	STAT4 (interacts with) HS6ST3	false
119887	interacts with	STAT4 (interacts with) CHST9	false
119888	interacts with	STAT4 (interacts with) LIPA	false
119889	interacts with	STAT4 (interacts with) CTNS	false
119890	interacts with	STAT4 (interacts with) ST3GAL3	false
119891	interacts with	STAT4 (interacts with) CHST7	false
119892	interacts with	STAT4 (interacts with) SMPD1	false
119893	interacts with	STAT4 (interacts with) CSGALNACT1	false
119894	interacts with	STAT5A (interacts with) MFNG	false
119895	interacts with	STAT5A (interacts with) GM2A	false
119896	interacts with	STAT5A (interacts with) RENBP	false
119897	interacts with	STAT5A (interacts with) LIPA	false
119898	interacts with	STAT5B (interacts with) CSGALNACT2	false
119899	interacts with	STAT5B (interacts with) NEU3	false
119900	interacts with	STAT5B (interacts with) MGAT4A	false
119901	interacts with	STAT5B (interacts with) MAN2A2	false
119902	interacts with	STAT5B (interacts with) MAN1A1	false
119903	interacts with	STAT5B (interacts with) NDST1	false
119904	interacts with	STAT5B (interacts with) ARSB	false
119905	interacts with	STAT5B (interacts with) ST3GAL2	false
119906	interacts with	STAT5B (interacts with) SLC35B4	false
119907	interacts with	STAT5B (interacts with) B4GALT6	false
119908	interacts with	STAT5B (interacts with) ST8SIA4	false
119909	interacts with	STAT5B (interacts with) UGCG	false
119910	interacts with	STAT5B (interacts with) LIPA	false
119911	interacts with	STAT5B (interacts with) PAPSS2	false
119912	interacts with	STAT5B (interacts with) CHSY1	false
119913	interacts with	STAT5B (interacts with) ASAH1	false
119914	interacts with	STAT5B (interacts with) GFPT2	false
119915	interacts with	STAT5B (interacts with) GM2A	false
119916	interacts with	STAT5B (interacts with) TPST1	false
119917	interacts with	STAT6 (interacts with) OGT	false
119918	interacts with	STAT6 (interacts with) FUT2	false
119919	interacts with	STAT6 (interacts with) COG7	false
119920	interacts with	STAT6 (interacts with) COG2	false
119921	interacts with	STAT6 (interacts with) SLC35C1	false
119922	interacts with	STAT6 (interacts with) COG3	false
119923	interacts with	STAT6 (interacts with) GCNT3	false
119924	interacts with	STAT6 (interacts with) B3GNT3	false
119925	interacts with	SUMO1 (interacts with) DAD1	false
119926	interacts with	SUMO1 (interacts with) PIGC	false
119927	interacts with	SUMO1 (interacts with) DPM1	false
119928	interacts with	SUMO1 (interacts with) SLC35B1	false
119929	interacts with	SUMO1 (interacts with) PIGX	false
119930	interacts with	SUMO1 (interacts with) SLC35A2	false
119931	interacts with	SUMO1 (interacts with) NANS	false
119932	interacts with	SUMO1 (interacts with) B3GNT3	false
119933	interacts with	SUMO1 (interacts with) RPN1	false
119934	interacts with	SUMO1 (interacts with) GALE	false
119935	interacts with	SUMO1 (interacts with) GALNT12	false
119936	interacts with	SUMO1 (interacts with) ALG3	false
119937	interacts with	SUMO1 (interacts with) GMPPA	false
119938	interacts with	SUMO1 (interacts with) COG7	false
119939	interacts with	SUMO1 (interacts with) PMM2	false
119940	interacts with	SUMO1 (interacts with) GALK2	false
119941	interacts with	SUMO2 (interacts with) COG1	false
119942	interacts with	SUPT5H (interacts with) GPI	false
119943	interacts with	SUPT5H (interacts with) COG4	false
119944	interacts with	SVIL (interacts with) CHSY1	false
119945	interacts with	TAF1 (interacts with) NEU3	false
119946	interacts with	TAF1 (interacts with) MAN1A2	false
119947	interacts with	TAF1 (interacts with) OGT	false
119948	interacts with	TAF1 (interacts with) FUT11	false
119949	interacts with	TAF1 (interacts with) COG5	false
119950	interacts with	TAF1 (interacts with) RTF1	false
119951	interacts with	TAF1 (interacts with) STT3B	false
119952	interacts with	TAF1 (interacts with) UGCG	false
119953	interacts with	TAF1 (interacts with) ALG10B	false
119954	interacts with	TAF1 (interacts with) NDST2	false
119955	interacts with	TAF1 (interacts with) FKTN	false
119956	interacts with	TAF1 (interacts with) SLC35D1	false
119957	interacts with	TAF1 (interacts with) FUT10	false
119958	interacts with	TAF1 (interacts with) GFPT1	false
119959	interacts with	TAF1 (interacts with) GLCE	false
119960	interacts with	TAF7 (interacts with) B4GALT3	false
119961	interacts with	TAF7 (interacts with) SLC35A2	false
119962	interacts with	TAF7 (interacts with) GALNT12	false
119963	interacts with	TBX3 (interacts with) MAN1C1	false
119964	interacts with	TBX3 (interacts with) NDST1	false
119965	interacts with	TBX3 (interacts with) B3GNT9	false
119966	interacts with	TCF12 (interacts with) FUT11	false
119967	interacts with	TCF12 (interacts with) RTF1	false
119968	interacts with	TCF12 (interacts with) GLCE	false
119969	interacts with	TCF12 (interacts with) COG5	false
119970	interacts with	TCF12 (interacts with) NEU3	false
119971	interacts with	TCF12 (interacts with) UGGT1	false
119972	interacts with	TCF12 (interacts with) SLC35A5	false
119973	interacts with	TCF12 (interacts with) UGDH	false
119974	interacts with	TCF12 (interacts with) CHSY1	false
119975	interacts with	TCF12 (interacts with) CSGALNACT2	false
119976	interacts with	TCF12 (interacts with) SLC35F5	false
119977	interacts with	TCF12 (interacts with) UGGT2	false
119978	interacts with	TCF12 (interacts with) UGP2	false
119979	interacts with	TCF12 (interacts with) SLC35D1	false
119980	interacts with	TCF12 (interacts with) MAN2A1	false
119981	interacts with	TCF12 (interacts with) MGAT5	false
119982	interacts with	TCF12 (interacts with) XYLT1	false
119983	interacts with	TCF12 (interacts with) DSE	false
119984	interacts with	TCF12 (interacts with) EXTL2	false
119985	interacts with	TCF12 (interacts with) GNS	false
119986	interacts with	TCF12 (interacts with) SULT1C4	false
119987	interacts with	TCF12 (interacts with) MAN1A1	false
119988	interacts with	TCF12 (interacts with) LAMP2	false
119989	interacts with	TCF12 (interacts with) NDST1	false
119990	interacts with	TCF21 (interacts with) MAN1C1	false
119991	interacts with	TCF21 (interacts with) ST6GALNAC6	false
119992	interacts with	TCF21 (interacts with) GFPT2	false
119993	interacts with	TCF21 (interacts with) TPST1	false
119994	interacts with	TCF21 (interacts with) CHST7	false
119995	interacts with	TCF21 (interacts with) NDST1	false
119996	interacts with	TCF21 (interacts with) GAL3ST4	false
119997	interacts with	TCF21 (interacts with) B3GNT9	false
119998	interacts with	TCF21 (interacts with) ST3GAL2	false
119999	interacts with	TCF21 (interacts with) CSGALNACT2	false
120000	interacts with	TCF21 (interacts with) MGAT1	false
120001	interacts with	TCF21 (interacts with) ST3GAL3	false
120002	interacts with	TCF21 (interacts with) CHSY1	false
120003	interacts with	TCF21 (interacts with) CTNS	false
120004	interacts with	TCF7 (interacts with) ST6GAL1	false
120005	interacts with	TCF7L2 (interacts with) GALNT4	false
120006	interacts with	TCF7L2 (interacts with) GALNT7	false
120007	interacts with	TCF7L2 (interacts with) B3GNT5	false
120008	interacts with	TCF7L2 (interacts with) SLC35A2	false
120009	interacts with	TCF7L2 (interacts with) B3GNT3	false
120010	interacts with	TCF7L2 (interacts with) C1GALT1	false
120011	interacts with	TCF7L2 (interacts with) COG7	false
120012	interacts with	TCF7L2 (interacts with) GALNT5	false
120013	interacts with	TCF7L2 (interacts with) HAS3	false
120014	interacts with	TCF7L2 (interacts with) SLC35D2	false
120015	interacts with	TCF7L2 (interacts with) C1GALT1C1	false
120016	interacts with	TCF7L2 (interacts with) GALNT12	false
120017	interacts with	TEAD1 (interacts with) CSGALNACT2	false
120018	interacts with	TEAD1 (interacts with) UGCG	false
120019	interacts with	TEAD1 (interacts with) FAM20B	false
120020	interacts with	TEAD1 (interacts with) EXTL2	false
120021	interacts with	TEAD1 (interacts with) NDST1	false
120022	interacts with	TEAD1 (interacts with) CHST15	false
120023	interacts with	TEAD1 (interacts with) SLC35A5	false
120024	interacts with	TEAD1 (interacts with) ARSB	false
120025	interacts with	TEAD1 (interacts with) DSE	false
120026	interacts with	TEAD1 (interacts with) MAN2A1	false
120027	interacts with	TEAD1 (interacts with) GALNT1	false
120028	interacts with	TEAD1 (interacts with) GLCE	false
120029	interacts with	TEAD1 (interacts with) CHSY1	false
120030	interacts with	TEAD1 (interacts with) PAPSS2	false
120031	interacts with	TEAD1 (interacts with) GNS	false
120032	interacts with	TEAD1 (interacts with) SLC35B4	false
120033	interacts with	TEAD1 (interacts with) SULF1	false
120034	interacts with	TEAD1 (interacts with) HS3ST3B1	false
120035	interacts with	TEAD2 (interacts with) ST3GAL2	false
120036	interacts with	TEAD2 (interacts with) MAN1C1	false
120037	interacts with	TEAD2 (interacts with) CTNS	false
120038	interacts with	TEAD4 (interacts with) ALG3	false
120039	interacts with	TERF2 (interacts with) COG8	false
120040	interacts with	TET2 (interacts with) MAN1A2	false
120041	interacts with	TET2 (interacts with) STT3B	false
120042	interacts with	TET2 (interacts with) COG5	false
120043	interacts with	TET2 (interacts with) FUT11	false
120044	interacts with	TET2 (interacts with) UGCG	false
120045	interacts with	TET2 (interacts with) NDST2	false
120046	interacts with	TET2 (interacts with) SLC35D1	false
120047	interacts with	TET2 (interacts with) SLC35A3	false
120048	interacts with	TET2 (interacts with) CSGALNACT2	false
120049	interacts with	TET2 (interacts with) PIGN	false
120050	interacts with	TET2 (interacts with) GLCE	false
120051	interacts with	TET2 (interacts with) COG6	false
120052	interacts with	TET2 (interacts with) ASAH1	false
120053	interacts with	TET2 (interacts with) ALG13	false
120054	interacts with	TET2 (interacts with) CTBS	false
120055	interacts with	TFAP2A (interacts with) B3GNT3	false
120056	interacts with	TFAP2A (interacts with) POFUT2	false
120057	interacts with	TFAP2A (interacts with) MOGS	false
120058	interacts with	TFAP2A (interacts with) ALG3	false
120059	interacts with	TFAP2A (interacts with) SLC35C2	false
120060	interacts with	TFDP1 (interacts with) RTF1	false
120061	interacts with	TFE3 (interacts with) SULF2	false
120062	interacts with	TFE3 (interacts with) GALNS	false
120063	interacts with	TGIF1 (interacts with) MOGS	false
120064	interacts with	TGIF1 (interacts with) GALE	false
120065	interacts with	THAP11 (interacts with) COG8	false
120066	interacts with	USF1 (interacts with) DPM3	false
120067	interacts with	USF1 (interacts with) DPM2	false
120068	interacts with	USF1 (interacts with) RFNG	false
120069	interacts with	USF1 (interacts with) TSTA3	false
120070	interacts with	USF1 (interacts with) GMPPA	false
120071	interacts with	USF1 (interacts with) IDUA	false
120072	interacts with	USF1 (interacts with) B3GAT3	false
120073	interacts with	USF1 (interacts with) SLC35C2	false
120074	interacts with	USF1 (interacts with) B4GALT7	false
120075	interacts with	USF1 (interacts with) MOGS	false
120076	interacts with	USF1 (interacts with) GALT	false
120077	interacts with	USF1 (interacts with) ALG3	false
120078	interacts with	USF2 (interacts with) IDUA	false
120079	interacts with	USF2 (interacts with) B3GALT6	false
120080	interacts with	USF2 (interacts with) CHST12	false
120081	interacts with	USF2 (interacts with) NAGK	false
120082	interacts with	USF2 (interacts with) RENBP	false
120083	interacts with	VDR (interacts with) SULF2	false
120084	interacts with	VEZF1 (interacts with) ALG10B	false
120085	interacts with	VEZF1 (interacts with) ALG10	false
120086	interacts with	VEZF1 (interacts with) SLC35A5	false
120087	interacts with	VEZF1 (interacts with) UGCG	false
120088	interacts with	VEZF1 (interacts with) SLC35F5	false
120089	interacts with	VEZF1 (interacts with) GNS	false
120090	interacts with	VEZF1 (interacts with) COG6	false
120091	interacts with	VEZF1 (interacts with) PIGN	false
120092	interacts with	VEZF1 (interacts with) UGGT1	false
120093	interacts with	VEZF1 (interacts with) PIGK	false
120094	interacts with	VEZF1 (interacts with) ASAH1	false
120095	interacts with	VEZF1 (interacts with) CTBS	false
120096	interacts with	VEZF1 (interacts with) SLC35B4	false
120097	interacts with	XRN2 (interacts with) STT3B	false
120098	interacts with	XRN2 (interacts with) MAN2A1	false
120099	interacts with	XRN2 (interacts with) MAN1A2	false
120100	interacts with	XRN2 (interacts with) NEU3	false
120101	interacts with	XRN2 (interacts with) FUT11	false
120102	interacts with	XRN2 (interacts with) COG5	false
120103	interacts with	XRN2 (interacts with) PIGN	false
120104	interacts with	XRN2 (interacts with) UGGT1	false
120105	interacts with	XRN2 (interacts with) POFUT1	false
120106	interacts with	XRN2 (interacts with) GANAB	false
120107	interacts with	XRN2 (interacts with) SLC35E1	false
120108	interacts with	XRN2 (interacts with) SLC35F5	false
120109	interacts with	XRN2 (interacts with) RTF1	false
120110	interacts with	XRN2 (interacts with) FKTN	false
120111	interacts with	XRN2 (interacts with) GLCE	false
120112	interacts with	XRN2 (interacts with) LAMP2	false
120113	interacts with	XRN2 (interacts with) CTBS	false
120114	interacts with	XRN2 (interacts with) COG6	false
120115	interacts with	XRN2 (interacts with) FAM20B	false
120116	interacts with	XRN2 (interacts with) IDS	false
120117	interacts with	XRN2 (interacts with) SLC17A5	false
120118	interacts with	XRN2 (interacts with) ASAH1	false
120119	interacts with	YAP1 (interacts with) STT3B	false
120120	interacts with	YAP1 (interacts with) SLC35F5	false
120121	interacts with	YAP1 (interacts with) COG5	false
120122	interacts with	YAP1 (interacts with) SLC35A3	false
120123	interacts with	YAP1 (interacts with) COG6	false
120124	interacts with	YAP1 (interacts with) SLC35A5	false
120125	interacts with	YAP1 (interacts with) GANAB	false
120126	interacts with	YAP1 (interacts with) CHST15	false
120127	interacts with	YAP1 (interacts with) FKTN	false
120128	interacts with	YAP1 (interacts with) PIGK	false
120129	interacts with	YAP1 (interacts with) CTBS	false
120130	interacts with	YAP1 (interacts with) LAMP2	false
120131	interacts with	YAP1 (interacts with) UGDH	false
120132	interacts with	YAP1 (interacts with) B3GNT5	false
120133	interacts with	YAP1 (interacts with) B3GNT2	false
120134	interacts with	YAP1 (interacts with) UGGT1	false
120135	interacts with	YAP1 (interacts with) GALNT7	false
120136	interacts with	YAP1 (interacts with) ALG10	false
120137	interacts with	YAP1 (interacts with) GALC	false
120138	interacts with	YAP1 (interacts with) ALG10B	false
120139	interacts with	YAP1 (interacts with) MANBA	false
120140	interacts with	ZBTB17 (interacts with) RFNG	false
120141	interacts with	ZBTB17 (interacts with) B3GALT6	false
120142	interacts with	ZBTB17 (interacts with) PIGQ	false
120143	interacts with	ZBTB17 (interacts with) B3GAT3	false
120144	interacts with	ZBTB17 (interacts with) DPM3	false
120145	interacts with	ZBTB17 (interacts with) IDUA	false
120146	interacts with	ZBTB17 (interacts with) MOGS	false
120147	interacts with	ZBTB17 (interacts with) POMT1	false
120148	interacts with	ZBTB17 (interacts with) B4GALT7	false
120149	interacts with	ZBTB17 (interacts with) GALK1	false
120150	interacts with	ZBTB17 (interacts with) SLC35C2	false
120151	interacts with	ZBTB17 (interacts with) FKRP	false
120152	interacts with	ZBTB17 (interacts with) CHST12	false
120153	interacts with	ZBTB17 (interacts with) B4GALT2	false
120154	interacts with	ZBTB17 (interacts with) ALG12	false
120155	interacts with	ZBTB17 (interacts with) DPM2	false
120156	interacts with	ZBTB17 (interacts with) POMGNT1	false
120157	interacts with	ZBTB17 (interacts with) GMPPA	false
120158	interacts with	ZBTB17 (interacts with) MAN1B1	false
120159	interacts with	ZBTB17 (interacts with) XYLT2	false
120160	interacts with	ZBTB17 (interacts with) GPAA1	false
120161	interacts with	ZBTB17 (interacts with) CHPF2	false
120162	interacts with	ZBTB17 (interacts with) B3GNT8	false
120163	interacts with	ZBTB17 (interacts with) CHPF	false
