# Supplementary material for: A systems-based framework to computationally describe putative transcription factors and signaling pathways regulating glycan biosynthesis
Source: publisher site journal article supplement (doi:10.3762/bjoc.17.119), 2021-07-22
Supplement: Additional file 2 [file 1860-5397-17-119-S2.cys › CytoscapeSession-2021_03_21-12_01/tables/120164-PCPG/LOCAL_ATTRS-org.cytoscape.model.CyNode-PCPG+default+node.cytable]

CyCSV-Version	1
SUID	name	nodeType	selected
java.lang.Long	java.lang.String	java.lang.String	java.lang.Boolean
		mutable
PCPG default node
105686	AFF4	TF	false
105687	MAN1A2	Glycogene	false
105688	STT3B	Glycogene	false
105689	NEU3	Glycogene	false
105690	FUT11	Glycogene	false
105694	MAN2A1	Glycogene	false
105691	ACER2	Glycogene	false
105692	COG5	Glycogene	false
105985	UGCG	Glycogene	false
105998	GANAB	Glycogene	false
105715	CSGALNACT2	Glycogene	false
105732	SLC35E3	Glycogene	false
107970	ARID3A	TF	false
108555	DDOST	Glycogene	false
107273	ASH2L	TF	false
107278	FUT10	Glycogene	false
105800	KHK	Glycogene	false
105701	ATF1	TF	false
105700	RTF1	Glycogene	false
105731	FAM20B	Glycogene	false
105823	COG3	Glycogene	false
105772	NDST2	Glycogene	false
105771	OGT	Glycogene	false
107297	GNE	Glycogene	false
105704	ATF2	TF	false
105696	SLC35F5	Glycogene	false
105874	PIGO	Glycogene	false
107309	GBA	Glycogene	false
105706	ATF3	TF	false
105707	B3GNT5	Glycogene	false
108550	ATF4	TF	false
105735	PMM1	Glycogene	false
105782	B4GALT7	Glycogene	false
111091	ATF5	TF	false
105880	TSTA3	Glycogene	false
105712	ATRX	TF	false
105713	FKTN	Glycogene	false
107973	AUTS2	TF	false
105723	BATF3	TF	false
105859	HK3	Glycogene	false
105724	MGAT1	Glycogene	false
105717	CHSY1	Glycogene	false
105726	BMI1	TF	false
105727	ALG10B	Glycogene	false
105711	ALG10	Glycogene	false
105845	SLC35B4	Glycogene	false
107305	GNPDA1	Glycogene	false
105733	BRD1	TF	false
105734	ALG12	Glycogene	false
107276	BRD2	TF	false
105730	PIGN	Glycogene	false
107277	BRD3	TF	false
109689	PIGG	Glycogene	false
105824	COG6	Glycogene	false
107977	BRD7	TF	false
105695	SLC35A3	Glycogene	false
105738	CASP8AP2	TF	false
106845	CBFA2T3	TF	false
105768	A4GALT	Glycogene	false
108579	ST3GAL1	Glycogene	false
105739	CBFB	TF	false
105718	CHST11	Glycogene	false
105805	CSGALNACT1	Glycogene	false
106847	CBX6	TF	false
111094	CD59	TF	false
107990	B4GALNT1	Glycogene	false
118328	CDK7	TF	false
108001	SLC35A1	Glycogene	false
105757	CDK9	TF	false
105758	DPM2	Glycogene	false
105759	PIGQ	Glycogene	false
105760	MAN1B1	Glycogene	false
105744	RFNG	Glycogene	false
105722	DPM3	Glycogene	false
110804	SGSH	Glycogene	false
108564	CEBPZ	TF	false
106893	STT3A	Glycogene	false
105770	CHD2	TF	false
105773	CHD4	TF	false
105806	ST3GAL2	Glycogene	false
112217	CHD7	TF	false
106849	CLOCK	TF	false
105780	CPSF3L	TF	false
105781	B3GALT6	Glycogene	false
107986	SLC35C2	Glycogene	false
108559	GALE	Glycogene	false
111095	CREB3L2	TF	false
105793	CTBP1	TF	false
108558	PIGC	Glycogene	false
107985	DICER1	TF	false
107285	EED	TF	false
108554	ALG9	Glycogene	false
107286	ALG8	Glycogene	false
105813	EGLN2	TF	false
106030	B3GALT4	Glycogene	false
105825	ELF2	TF	false
105826	ELK3	TF	false
106852	ELL2	TF	false
108026	GLA	Glycogene	false
105829	EP400	TF	false
108023	POMT2	Glycogene	false
108577	EPAS1	TF	false
105750	MGAT3	Glycogene	false
105766	MFNG	Glycogene	false
105923	NDST1	Glycogene	false
111112	SLC35E4	Glycogene	false
107292	ERCC3	TF	false
105832	ERG	TF	false
105833	CHSY3	Glycogene	false
105802	FUT1	Glycogene	false
107274	B4GALT1	Glycogene	false
106855	ST6GAL1	Glycogene	false
105979	SULF2	Glycogene	false
105751	HYAL1	Glycogene	false
108580	EXT1	Glycogene	false
105839	ETS1	TF	false
105815	ST6GALNAC3	Glycogene	false
105846	EZH1	TF	false
114952	CTNS	Glycogene	false
109684	XYLT2	Glycogene	false
120174	FEV	TF	false
105685	FUT7	Glycogene	false
108032	B3GNT9	Glycogene	false
105848	FLI1	TF	false
105737	HYAL2	Glycogene	false
107295	FOSL2	TF	false
105708	HAS1	Glycogene	false
105709	HAS2	Glycogene	false
107298	FOXK1	TF	false
105861	GABPA	TF	false
105792	POFUT1	Glycogene	false
106859	GALNT7	Glycogene	false
105862	GATA6	TF	false
105866	GLYR1	TF	false
105791	COG7	Glycogene	false
105867	ALG1	Glycogene	false
107291	PAPSS1	Glycogene	false
105871	GTF2I	TF	false
105705	UGGT1	Glycogene	false
106844	SLC35E1	Glycogene	false
105893	MGAT5	Glycogene	false
105905	GNS	Glycogene	false
107974	GALNT11	Glycogene	false
109675	GLB1	Glycogene	false
105875	HECTD1	TF	false
105877	HINFP	TF	false
105878	DPAGT1	Glycogene	false
105754	B3GAT3	Glycogene	false
105879	HSF1	TF	false
105892	JMJD1C	TF	false
105899	JUND	TF	false
107312	KAT2B	TF	false
105716	MAN1A1	Glycogene	false
107279	B4GALT5	Glycogene	false
105900	KAT5	TF	false
106891	COG8	Glycogene	false
105903	KDM3A	TF	false
107997	KDM4C	TF	false
110798	LARP7	TF	false
106005	COG1	Glycogene	false
107320	LDB1	TF	false
113227	LEO1	TF	false
105909	LMO2	TF	false
105911	LYL1	TF	false
108594	SULT1A3	Glycogene	false
108598	MAFF	TF	false
105915	MAX	TF	false
105852	PIGH	Glycogene	false
107323	MBD3	TF	false
105917	B4GALT2	Glycogene	false
105797	ALG3	Glycogene	false
105921	MECP2	TF	false
105922	IDS	Glycogene	false
105702	SLC35A5	Glycogene	false
105954	PIGM	Glycogene	false
105925	MEF2A	TF	false
105976	FPGT	Glycogene	false
105697	GALNT10	Glycogene	false
105926	MEF2C	TF	false
106878	MEIS3	TF	false
105777	MAN2B1	Glycogene	false
105932	MSX1	TF	false
120175	MTA3	TF	false
108552	GCNT1	Glycogene	false
105934	MYBL1	TF	false
107287	FUT2	Glycogene	false
105942	MZF1	TF	false
105948	NPAT	TF	false
105949	NR2C2	TF	false
107290	ASAH1	Glycogene	false
108017	NR2F2	TF	false
107333	NRF1	TF	false
105953	PBX1	TF	false
114947	GALNT13	Glycogene	false
113231	PBX3	TF	false
105955	PCGF1	TF	false
105749	IDUA	Glycogene	false
105956	PHF20	TF	false
105957	PHF6	TF	false
107334	PHF8	TF	false
105959	POLR2B	TF	false
105960	POLR3A	TF	false
105748	MAN2A2	Glycogene	false
107335	SLC35A2	Glycogene	false
118335	MANBA	Glycogene	false
105883	GM2A	Glycogene	false
114948	POLR3GL	TF	false
106880	POU2F2	TF	false
108021	PRDM4	TF	false
120176	PROX1	TF	false
105967	RBBP5	TF	false
108610	RBCK1	TF	false
107983	B3GNT8	Glycogene	false
105968	RBL2	TF	false
105950	SLC35D1	Glycogene	false
106882	GFPT1	Glycogene	false
113233	RBPJ	TF	false
105972	RFX5	TF	false
106869	GALC	Glycogene	false
105974	RFX7	TF	false
108613	RING1	TF	false
108614	SATB1	TF	false
108025	SCML2	TF	false
120177	SF1	TF	false
120178	FUT9	Glycogene	false
105908	B3GALNT2	Glycogene	false
106885	SIRT6	TF	false
105753	GALK1	Glycogene	false
105987	SMAD4	TF	false
107343	SMARCA4	TF	false
105918	MGAT4B	Glycogene	false
105988	SMARCC2	TF	false
112230	ARSD	Glycogene	false
105990	SMC3	TF	false
110811	SNAPC5	TF	false
105991	SOX10	TF	false
112225	ST6GALNAC2	Glycogene	false
105808	B3GALT2	Glycogene	false
105992	SOX17	TF	false
107346	SP2	TF	false
108029	STAT5B	TF	false
110806	GALK2	Glycogene	false
112231	SUMO1	TF	false
107332	PIGY	Glycogene	false
106004	SUMO2	TF	false
108622	SUPT5H	TF	false
105761	POMT1	Glycogene	false
107349	SVIL	TF	false
107351	TAF3	TF	false
108624	TAL1	TF	false
116610	TBX3	TF	false
106857	ST3GAL5	Glycogene	false
106013	TEAD1	TF	false
106015	TERF1	TF	false
107353	TERF2	TF	false
106016	TET2	TF	false
106890	THAP11	TF	false
106892	COG4	Glycogene	false
106022	USF2	TF	false
