# Supplementary material for: A systems-based framework to computationally describe putative transcription factors and signaling pathways regulating glycan biosynthesis
Source: publisher site journal article supplement (doi:10.3762/bjoc.17.119), 2021-07-22
Supplement: Additional file 2 [file 1860-5397-17-119-S2.cys › CytoscapeSession-2021_03_21-12_01/tables/120744-PRAD/LOCAL_ATTRS-org.cytoscape.model.CyEdge-PRAD+default+edge.cytable]

CyCSV-Version	1
SUID	interaction	name	selected
java.lang.Long	java.lang.String	java.lang.String	java.lang.Boolean
PRAD default edge
120758	interacts with	AFF4 (interacts with) MAN1A2	false
120759	interacts with	AFF4 (interacts with) STT3B	false
120760	interacts with	AFF4 (interacts with) NEU3	false
120761	interacts with	AFF4 (interacts with) FUT11	false
120762	interacts with	AFF4 (interacts with) ACER2	false
120763	interacts with	AFF4 (interacts with) COG5	false
120764	interacts with	AFF4 (interacts with) UGCG	false
120765	interacts with	AFF4 (interacts with) GALNT10	false
120766	interacts with	AFF4 (interacts with) SLC35D1	false
120767	interacts with	AFF4 (interacts with) SLC35E1	false
120768	interacts with	AFF4 (interacts with) PIGO	false
120769	interacts with	ALKBH3 (interacts with) B3GAT3	false
120770	interacts with	ALKBH3 (interacts with) DPM3	false
120771	interacts with	AR (interacts with) MAN2A1	false
120772	interacts with	AR (interacts with) ACER2	false
120773	interacts with	AR (interacts with) FUT11	false
120774	interacts with	AR (interacts with) UGCG	false
120775	interacts with	AR (interacts with) COG5	false
120776	interacts with	AR (interacts with) PIGO	false
120777	interacts with	AR (interacts with) FAM20B	false
120778	interacts with	ARID2 (interacts with) RTF1	false
120779	interacts with	ARNT2 (interacts with) ALG10B	false
120780	interacts with	ARNT2 (interacts with) PIGO	false
120781	interacts with	ARNT2 (interacts with) GANAB	false
120782	interacts with	ASCL2 (interacts with) ST6GALNAC4	false
120783	interacts with	ASCL2 (interacts with) B3GNT9	false
120784	interacts with	ATF1 (interacts with) FUT11	false
120785	interacts with	ATF1 (interacts with) SLC35F5	false
120786	interacts with	ATF1 (interacts with) GALNT4	false
120787	interacts with	ATF1 (interacts with) RTF1	false
120788	interacts with	ATF2 (interacts with) MAN1A2	false
120789	interacts with	ATF2 (interacts with) MAN2A1	false
120790	interacts with	ATF2 (interacts with) FUT11	false
120791	interacts with	ATF2 (interacts with) SLC35F5	false
120792	interacts with	ATF2 (interacts with) RTF1	false
120793	interacts with	ATF2 (interacts with) PIGO	false
120794	interacts with	ATF3 (interacts with) HAS3	false
120795	interacts with	ATF4 (interacts with) RFNG	false
120796	interacts with	ATF4 (interacts with) DPM2	false
120797	interacts with	ATF4 (interacts with) B4GALT7	false
120798	interacts with	ATF4 (interacts with) IDUA	false
120799	interacts with	ATF4 (interacts with) PIGQ	false
120800	interacts with	ATF4 (interacts with) B3GALT6	false
120801	interacts with	ATRX (interacts with) FKTN	false
120802	interacts with	AUTS2 (interacts with) GAL3ST4	false
120803	interacts with	BACH1 (interacts with) CSGALNACT2	false
120804	interacts with	BACH1 (interacts with) UGCG	false
120805	interacts with	BACH1 (interacts with) MAN1A2	false
120806	interacts with	BACH1 (interacts with) FUT11	false
120807	interacts with	BACH1 (interacts with) MAN1A1	false
120808	interacts with	BACH1 (interacts with) ACER2	false
120809	interacts with	BACH1 (interacts with) NEU3	false
120810	interacts with	BACH1 (interacts with) SLC35E1	false
120811	interacts with	BACH1 (interacts with) PIGO	false
120812	interacts with	BCOR (interacts with) MAN2A2	false
120813	interacts with	BCOR (interacts with) PIGO	false
120814	interacts with	BMI1 (interacts with) ALG10B	false
120815	interacts with	BMI1 (interacts with) FAM20B	false
120816	interacts with	BMI1 (interacts with) MAN1A2	false
120817	interacts with	BMI1 (interacts with) ALG10	false
120818	interacts with	BMI1 (interacts with) STT3B	false
120819	interacts with	BMI1 (interacts with) GALNT4	false
120820	interacts with	BMI1 (interacts with) UGCG	false
120821	interacts with	BMI1 (interacts with) GALNT1	false
120822	interacts with	BMI1 (interacts with) SLC35A3	false
120823	interacts with	BMI1 (interacts with) FKTN	false
120824	interacts with	BMI1 (interacts with) NEU3	false
120825	interacts with	BMI1 (interacts with) GLCE	false
120826	interacts with	BRD1 (interacts with) MAN2A2	false
120827	interacts with	BRD1 (interacts with) NDST2	false
120828	interacts with	BRD1 (interacts with) OGT	false
120829	interacts with	BRD1 (interacts with) POFUT2	false
120830	interacts with	BRD2 (interacts with) STT3B	false
120831	interacts with	BRD2 (interacts with) FUT11	false
120832	interacts with	BRD2 (interacts with) RTF1	false
120833	interacts with	BRD2 (interacts with) NDST2	false
120834	interacts with	BRD2 (interacts with) MAN2A2	false
120835	interacts with	BRD2 (interacts with) FKTN	false
120836	interacts with	BRD2 (interacts with) UGDH	false
120837	interacts with	BRD2 (interacts with) POFUT1	false
120838	interacts with	BRD2 (interacts with) COG1	false
120839	interacts with	BRD2 (interacts with) NDST1	false
120840	interacts with	BRD2 (interacts with) UGCG	false
120841	interacts with	BRD2 (interacts with) SLC35E1	false
120842	interacts with	BRD3 (interacts with) RTF1	false
120843	interacts with	BRD3 (interacts with) STT3B	false
120844	interacts with	BRD3 (interacts with) FUT11	false
120845	interacts with	BRD3 (interacts with) NDST2	false
120846	interacts with	BRD3 (interacts with) GANAB	false
120847	interacts with	BRD3 (interacts with) NDST1	false
120848	interacts with	BRD3 (interacts with) ALG10B	false
120849	interacts with	BRD3 (interacts with) MAN2A2	false
120850	interacts with	BRD4 (interacts with) STT3B	false
120851	interacts with	BRD4 (interacts with) UGCG	false
120852	interacts with	BRD4 (interacts with) FUT11	false
120853	interacts with	BRD4 (interacts with) MAN2A2	false
120854	interacts with	BRD4 (interacts with) NDST2	false
120855	interacts with	BRD4 (interacts with) COG1	false
120856	interacts with	C17orf49 (interacts with) B3GAT3	false
120857	interacts with	CASP8AP2 (interacts with) ALG10B	false
120858	interacts with	CBFA2T3 (interacts with) GALNS	false
120859	interacts with	CBX7 (interacts with) MFNG	false
120860	interacts with	CBX7 (interacts with) GCNT4	false
120861	interacts with	CBX7 (interacts with) CHST15	false
120862	interacts with	CBX7 (interacts with) CHST3	false
120863	interacts with	CBX7 (interacts with) SLC35F4	false
120864	interacts with	CBX7 (interacts with) ST6GALNAC2	false
120865	interacts with	CBX7 (interacts with) GAL3ST3	false
120866	interacts with	CBX7 (interacts with) UST	false
120867	interacts with	CBX7 (interacts with) HS3ST3B1	false
120868	interacts with	CBX7 (interacts with) B4GALNT1	false
120869	interacts with	CDK12 (interacts with) PIGO	false
120870	interacts with	CDK12 (interacts with) GANAB	false
120871	interacts with	CDK12 (interacts with) SLC35E1	false
120872	interacts with	CDK8 (interacts with) STT3B	false
120873	interacts with	CDK8 (interacts with) MAN1A2	false
120874	interacts with	CDK8 (interacts with) FUT11	false
120875	interacts with	CDK8 (interacts with) SLC35D1	false
120876	interacts with	CDK8 (interacts with) RTF1	false
120877	interacts with	CDK8 (interacts with) SLC35E3	false
120878	interacts with	CDK8 (interacts with) POFUT1	false
120879	interacts with	CDK8 (interacts with) PIGO	false
120880	interacts with	CDK8 (interacts with) FAM20B	false
120881	interacts with	CDK8 (interacts with) MAN2A2	false
120882	interacts with	CDK9 (interacts with) PIGQ	false
120883	interacts with	CDK9 (interacts with) DPM3	false
120884	interacts with	CDK9 (interacts with) B4GALT7	false
120885	interacts with	CDK9 (interacts with) NAGK	false
120886	interacts with	CEBPA (interacts with) DPM3	false
120887	interacts with	CEBPA (interacts with) DPM2	false
120888	interacts with	CEBPA (interacts with) B3GAT3	false
120889	interacts with	CEBPA (interacts with) NANS	false
120890	interacts with	CEBPA (interacts with) ALG3	false
120891	interacts with	CEBPD (interacts with) MGAT1	false
120892	interacts with	CEBPD (interacts with) B3GNT8	false
120893	interacts with	CEBPZ (interacts with) RTF1	false
120894	interacts with	CHD1 (interacts with) MAN2A1	false
120895	interacts with	CHD1 (interacts with) RTF1	false
120896	interacts with	CHD1 (interacts with) SLC35D1	false
120897	interacts with	CHD1 (interacts with) MAN2A2	false
120898	interacts with	CHD1 (interacts with) B3GNT5	false
120899	interacts with	CHD2 (interacts with) MAN1A2	false
120900	interacts with	CHD2 (interacts with) NDST2	false
120901	interacts with	CHD8 (interacts with) NEU3	false
120902	interacts with	CHD8 (interacts with) STT3B	false
120903	interacts with	CHD8 (interacts with) FUT11	false
120904	interacts with	CHD8 (interacts with) RTF1	false
120905	interacts with	CHD8 (interacts with) PIGO	false
120906	interacts with	CHD8 (interacts with) NDST2	false
120907	interacts with	CHD8 (interacts with) GANAB	false
120908	interacts with	CLOCK (interacts with) FUT11	false
120909	interacts with	CLOCK (interacts with) PIGO	false
120910	interacts with	CPSF3L (interacts with) B3GALT6	false
120911	interacts with	CPSF3L (interacts with) RFNG	false
120912	interacts with	CPSF3L (interacts with) PIGQ	false
120913	interacts with	CPSF3L (interacts with) B3GAT3	false
120914	interacts with	CPSF3L (interacts with) B4GALT7	false
120915	interacts with	CPSF3L (interacts with) GALT	false
120916	interacts with	CPSF3L (interacts with) PMM1	false
120917	interacts with	CREB1 (interacts with) FUT11	false
120918	interacts with	CREB3 (interacts with) GMPPA	false
120919	interacts with	CREB3 (interacts with) B3GALT4	false
120920	interacts with	CREB3 (interacts with) NAGLU	false
120921	interacts with	CREB3L2 (interacts with) FUT11	false
120922	interacts with	CREB3L4 (interacts with) GMPPA	false
120923	interacts with	CREBBP (interacts with) FUT11	false
120924	interacts with	CREBBP (interacts with) NDST2	false
120925	interacts with	CSNK2A1 (interacts with) GANAB	false
120926	interacts with	CSNK2A1 (interacts with) FUT11	false
120927	interacts with	CSNK2A1 (interacts with) SLC35E3	false
120928	interacts with	CSNK2A1 (interacts with) UGDH	false
120929	interacts with	CTBP1 (interacts with) TSTA3	false
120930	interacts with	CTNNB1 (interacts with) FUT11	false
120931	interacts with	CTNNB1 (interacts with) UGCG	false
120932	interacts with	CTNNB1 (interacts with) B4GALT5	false
120933	interacts with	CTNNB1 (interacts with) NEU3	false
120934	interacts with	CTNNB1 (interacts with) SLC35A3	false
120935	interacts with	CTNNB1 (interacts with) MAN2A1	false
120936	interacts with	CTNNB1 (interacts with) EXT2	false
120937	interacts with	CTNNB1 (interacts with) GNS	false
120938	interacts with	CTNNB1 (interacts with) ARSB	false
120939	interacts with	CTNNB1 (interacts with) RTF1	false
120940	interacts with	DCP1A (interacts with) STT3B	false
120941	interacts with	DDIT3 (interacts with) DPM3	false
120942	interacts with	DLX1 (interacts with) UGDH	false
120943	interacts with	DNMT3A (interacts with) UGDH	false
120944	interacts with	DNMT3A (interacts with) MGAT5	false
120945	interacts with	DR1 (interacts with) FUT11	false
120946	interacts with	DYRK1A (interacts with) PIGN	false
120947	interacts with	DYRK1A (interacts with) GLCE	false
120948	interacts with	DYRK1A (interacts with) ACER2	false
120949	interacts with	EBF1 (interacts with) ST6GALNAC3	false
120950	interacts with	EBF1 (interacts with) ST3GAL2	false
120951	interacts with	EBF1 (interacts with) SULF2	false
120952	interacts with	EBF1 (interacts with) CHST1	false
120953	interacts with	EBF1 (interacts with) HAS2	false
120954	interacts with	EBF1 (interacts with) CHST3	false
120955	interacts with	EBF1 (interacts with) HYAL1	false
120956	interacts with	EBF1 (interacts with) EXTL1	false
120957	interacts with	EBF1 (interacts with) SULF1	false
120958	interacts with	EBF1 (interacts with) B3GALT2	false
120959	interacts with	EBF1 (interacts with) MFNG	false
120960	interacts with	EBF1 (interacts with) CHST11	false
120961	interacts with	EBF1 (interacts with) GCNT4	false
120962	interacts with	EBF1 (interacts with) EXT1	false
120963	interacts with	EBF1 (interacts with) UST	false
120964	interacts with	EBF1 (interacts with) ST6GALNAC4	false
120965	interacts with	EBF1 (interacts with) IDS	false
120966	interacts with	EBF1 (interacts with) B4GALT5	false
120967	interacts with	EGLN2 (interacts with) MGAT1	false
120968	interacts with	EHF (interacts with) SLC35A3	false
120969	interacts with	EHF (interacts with) ALG10	false
120970	interacts with	EHF (interacts with) UGGT1	false
120971	interacts with	EHF (interacts with) MAN2A1	false
120972	interacts with	EHF (interacts with) COG5	false
120973	interacts with	EHF (interacts with) STT3B	false
120974	interacts with	EHF (interacts with) MAN1A2	false
120975	interacts with	EHF (interacts with) PIGO	false
120976	interacts with	EHF (interacts with) ACER2	false
120977	interacts with	EHF (interacts with) GALNT7	false
120978	interacts with	EHF (interacts with) RTF1	false
120979	interacts with	EHF (interacts with) FUT11	false
120980	interacts with	EHF (interacts with) SLC35E3	false
120981	interacts with	EHF (interacts with) SLC35D1	false
120982	interacts with	EHF (interacts with) GNS	false
120983	interacts with	EHF (interacts with) PIGM	false
120984	interacts with	ELK4 (interacts with) ALG10	false
120985	interacts with	ELK4 (interacts with) FUT11	false
120986	interacts with	ELK4 (interacts with) FAM20B	false
120987	interacts with	ELK4 (interacts with) ACER2	false
120988	interacts with	ELK4 (interacts with) SLC35A3	false
120989	interacts with	ELK4 (interacts with) SLC35E1	false
120990	interacts with	ELK4 (interacts with) ALG10B	false
120991	interacts with	ELK4 (interacts with) SLC35E3	false
120992	interacts with	ELK4 (interacts with) COG3	false
120993	interacts with	ELL2 (interacts with) COG5	false
120994	interacts with	ELL2 (interacts with) EXTL2	false
120995	interacts with	EP400 (interacts with) FKTN	false
120996	interacts with	EP400 (interacts with) STT3B	false
120997	interacts with	EP400 (interacts with) ACER2	false
120998	interacts with	EP400 (interacts with) FUT11	false
120999	interacts with	EP400 (interacts with) GANAB	false
121000	interacts with	EP400 (interacts with) PIGO	false
121001	interacts with	EP400 (interacts with) RTF1	false
121002	interacts with	ERCC3 (interacts with) FKTN	false
121003	interacts with	ERCC6 (interacts with) NDST2	false
121004	interacts with	ERCC6 (interacts with) COG5	false
121005	interacts with	ERCC6 (interacts with) ACER2	false
121006	interacts with	ERCC6 (interacts with) MAN2A1	false
121007	interacts with	ERCC6 (interacts with) UGGT1	false
121008	interacts with	ERCC6 (interacts with) SLC35E1	false
121009	interacts with	ERCC6 (interacts with) PIGO	false
121010	interacts with	ERCC6 (interacts with) MAN2A2	false
121011	interacts with	ERCC6 (interacts with) RTF1	false
121012	interacts with	ERCC6 (interacts with) GANAB	false
121013	interacts with	ERCC6 (interacts with) UGDH	false
121014	interacts with	ERCC6 (interacts with) POFUT1	false
121015	interacts with	ERG (interacts with) ARSB	false
121016	interacts with	ERG (interacts with) CSGALNACT1	false
121017	interacts with	ERG (interacts with) PAPSS2	false
121018	interacts with	ERG (interacts with) MGAT5B	false
121019	interacts with	ERG (interacts with) ST6GAL2	false
121020	interacts with	ERG (interacts with) ARSD	false
121021	interacts with	ESR1 (interacts with) GFPT2	false
121022	interacts with	ESR1 (interacts with) CHST11	false
121023	interacts with	ESR1 (interacts with) ST3GAL2	false
121024	interacts with	ESR1 (interacts with) CHST3	false
121025	interacts with	ESR1 (interacts with) SULF1	false
121026	interacts with	ESR1 (interacts with) SULF2	false
121027	interacts with	ESR1 (interacts with) HAS2	false
121028	interacts with	ESR1 (interacts with) HS3ST3A1	false
121029	interacts with	ESR1 (interacts with) MAN1A1	false
121030	interacts with	ESR1 (interacts with) ST6GALNAC3	false
121031	interacts with	ESR1 (interacts with) HS3ST3B1	false
121032	interacts with	ESR1 (interacts with) MFNG	false
121033	interacts with	ESR1 (interacts with) GALNT6	false
121034	interacts with	ESR1 (interacts with) SLC35F4	false
121035	interacts with	ESR1 (interacts with) GAL3ST4	false
121036	interacts with	ESR1 (interacts with) B3GNT9	false
121037	interacts with	ESRRA (interacts with) B3GAT3	false
121038	interacts with	ESRRA (interacts with) RFNG	false
121039	interacts with	ETS2 (interacts with) ST3GAL2	false
121040	interacts with	EZH1 (interacts with) HS3ST3A1	false
121041	interacts with	EZH1 (interacts with) CHST3	false
121042	interacts with	EZH1 (interacts with) ST8SIA1	false
121043	interacts with	EZH1 (interacts with) GCNT4	false
121044	interacts with	EZH1 (interacts with) IDS	false
121045	interacts with	EZH1 (interacts with) SULF2	false
121046	interacts with	EZH1 (interacts with) CHST15	false
121047	interacts with	EZH1 (interacts with) GAL3ST4	false
121048	interacts with	EZH1 (interacts with) CHST2	false
121049	interacts with	EZH1 (interacts with) HS3ST3B1	false
121050	interacts with	EZH1 (interacts with) SLC35F4	false
121051	interacts with	EZH1 (interacts with) EXT1	false
121052	interacts with	FOXA1 (interacts with) PIGM	false
121053	interacts with	FOXA1 (interacts with) SLC35A3	false
121054	interacts with	FOXA1 (interacts with) GALNT3	false
121055	interacts with	FOXA1 (interacts with) FKTN	false
121056	interacts with	FOXA1 (interacts with) POFUT1	false
121057	interacts with	FOXA1 (interacts with) MGAT2	false
121058	interacts with	FOXA1 (interacts with) COG5	false
121059	interacts with	FOXA1 (interacts with) GFPT1	false
121060	interacts with	FOXA1 (interacts with) GNPNAT1	false
121061	interacts with	FOXA1 (interacts with) ACER2	false
121062	interacts with	FOXA1 (interacts with) SLC35F5	false
121063	interacts with	FOXA1 (interacts with) SLC17A5	false
121064	interacts with	FOXA1 (interacts with) GALNT11	false
121065	interacts with	FOXA1 (interacts with) SLC35E3	false
121066	interacts with	FOXO1 (interacts with) CHST15	false
121067	interacts with	FOXO1 (interacts with) DSE	false
121068	interacts with	FOXO1 (interacts with) ST6GALNAC3	false
121069	interacts with	FOXO1 (interacts with) CHST3	false
121070	interacts with	FOXO1 (interacts with) GFPT2	false
121071	interacts with	FOXO1 (interacts with) ST3GAL2	false
121072	interacts with	FOXO1 (interacts with) ARSB	false
121073	interacts with	FOXO1 (interacts with) GCNT4	false
121074	interacts with	FOXO1 (interacts with) UST	false
121075	interacts with	FOXO1 (interacts with) PAPSS2	false
121076	interacts with	FOXO1 (interacts with) HAS2	false
121077	interacts with	FOXO1 (interacts with) CHST2	false
121078	interacts with	FOXO1 (interacts with) B4GALT5	false
121079	interacts with	FOXO1 (interacts with) SULF2	false
121080	interacts with	FOXO1 (interacts with) EXT1	false
121081	interacts with	FOXO1 (interacts with) FUT4	false
121082	interacts with	FOXO1 (interacts with) HS3ST3A1	false
121083	interacts with	FOXO1 (interacts with) CHST11	false
121084	interacts with	FOXO1 (interacts with) ST6GALNAC2	false
121085	interacts with	FOXO1 (interacts with) FUT10	false
121086	interacts with	GABPA (interacts with) FPGT	false
121087	interacts with	GABPA (interacts with) STT3B	false
121088	interacts with	GABPA (interacts with) FUT11	false
121089	interacts with	GABPA (interacts with) RTF1	false
121090	interacts with	GATA3 (interacts with) CHST11	false
121091	interacts with	GATA3 (interacts with) ST8SIA1	false
121092	interacts with	GATA3 (interacts with) GCNT4	false
121093	interacts with	GATA3 (interacts with) SULF2	false
121094	interacts with	GATA3 (interacts with) B3GNT3	false
121095	interacts with	GATA3 (interacts with) CHST15	false
121096	interacts with	GATA3 (interacts with) LAMP3	false
121097	interacts with	GATA3 (interacts with) B3GNT8	false
121098	interacts with	GATA3 (interacts with) ST6GALNAC2	false
121099	interacts with	GATA3 (interacts with) FUT2	false
121100	interacts with	GATA3 (interacts with) GALNT6	false
121101	interacts with	GATA3 (interacts with) CHST2	false
121102	interacts with	GATA3 (interacts with) ST6GALNAC4	false
121103	interacts with	GATA3 (interacts with) FUT3	false
121104	interacts with	GATA3 (interacts with) CHST6	false
121105	interacts with	GATA3 (interacts with) SLC35D3	false
121106	interacts with	GATA3 (interacts with) B3GALT2	false
121107	interacts with	GATA3 (interacts with) GAL3ST3	false
121108	interacts with	GATA6 (interacts with) TPST1	false
121109	interacts with	GATAD1 (interacts with) PIGL	false
121110	interacts with	GATAD1 (interacts with) OGT	false
121111	interacts with	GLI1 (interacts with) SULF1	false
121112	interacts with	GLI1 (interacts with) GFPT2	false
121113	interacts with	GLI1 (interacts with) ST3GAL2	false
121114	interacts with	GLI1 (interacts with) CHST3	false
121115	interacts with	GLI3 (interacts with) FUT10	false
121116	interacts with	GLYR1 (interacts with) COG7	false
121117	interacts with	GLYR1 (interacts with) COG5	false
121118	interacts with	GLYR1 (interacts with) SLC35D1	false
121119	interacts with	GLYR1 (interacts with) FUT11	false
121120	interacts with	GLYR1 (interacts with) ALG10B	false
121121	interacts with	GMEB1 (interacts with) RTF1	false
121122	interacts with	GRHL1 (interacts with) B3GNT5	false
121123	interacts with	GTF2F1 (interacts with) RFNG	false
121124	interacts with	GTF2I (interacts with) COG5	false
121125	interacts with	GTF2I (interacts with) UGGT1	false
121126	interacts with	GTF2I (interacts with) SLC35A3	false
121127	interacts with	GTF2I (interacts with) ALG10	false
121128	interacts with	GTF2I (interacts with) FUT11	false
121129	interacts with	GTF2I (interacts with) SLC35E3	false
121130	interacts with	GTF2I (interacts with) SLC35E1	false
121131	interacts with	GTF2I (interacts with) COG6	false
121132	interacts with	GTF2I (interacts with) GANAB	false
121133	interacts with	GTF2I (interacts with) ALG10B	false
121134	interacts with	GTF2I (interacts with) POFUT1	false
121135	interacts with	GTF2I (interacts with) GLCE	false
121136	interacts with	GTF2I (interacts with) GNS	false
121137	interacts with	GTF2I (interacts with) COG2	false
121138	interacts with	GTF2I (interacts with) GALNT7	false
121139	interacts with	HBP1 (interacts with) ALG10	false
121140	interacts with	HBP1 (interacts with) RTF1	false
121141	interacts with	HBP1 (interacts with) GNS	false
121142	interacts with	HCFC1 (interacts with) NEU3	false
121143	interacts with	HCFC1 (interacts with) PIGO	false
121144	interacts with	HCFC1 (interacts with) MAN1A2	false
121145	interacts with	HCFC1 (interacts with) GANAB	false
121146	interacts with	HCFC1 (interacts with) NDST2	false
121147	interacts with	HCFC1 (interacts with) SLC35E1	false
121148	interacts with	HCFC1 (interacts with) POFUT1	false
121149	interacts with	HCFC1 (interacts with) NDST1	false
121150	interacts with	HCFC1 (interacts with) MAN2A2	false
121151	interacts with	HCFC1 (interacts with) FUT11	false
121152	interacts with	HDAC1 (interacts with) ARSD	false
121153	interacts with	HDAC1 (interacts with) CSGALNACT1	false
121154	interacts with	HDAC1 (interacts with) B3GNT6	false
121155	interacts with	HDAC2 (interacts with) UGDH	false
121156	interacts with	HDAC2 (interacts with) GANAB	false
121157	interacts with	HECTD1 (interacts with) FUT11	false
121158	interacts with	HECTD1 (interacts with) UGCG	false
121159	interacts with	HECTD1 (interacts with) FAM20B	false
121160	interacts with	HES1 (interacts with) UGDH	false
121161	interacts with	HEYL (interacts with) EXTL1	false
121162	interacts with	HEYL (interacts with) GAL3ST4	false
121163	interacts with	HIF1A (interacts with) STT3B	false
121164	interacts with	HIF1A (interacts with) MAN2A1	false
121165	interacts with	HIF1A (interacts with) CHSY1	false
121166	interacts with	HIF1A (interacts with) FUT11	false
121167	interacts with	HIF1A (interacts with) SLC35F5	false
121168	interacts with	HIF1A (interacts with) SLC35A3	false
121169	interacts with	HIF1A (interacts with) B4GALT5	false
121170	interacts with	HIF1A (interacts with) COG5	false
121171	interacts with	HIF1A (interacts with) GNS	false
121172	interacts with	HIRA (interacts with) NDST1	false
121173	interacts with	HIRA (interacts with) PIGO	false
121174	interacts with	HIRA (interacts with) STT3B	false
121175	interacts with	HIRA (interacts with) SLC35E3	false
121176	interacts with	HIRA (interacts with) XYLT1	false
121177	interacts with	HIRA (interacts with) UGCG	false
121178	interacts with	HIRA (interacts with) FKTN	false
121179	interacts with	HIRA (interacts with) GALNT1	false
121180	interacts with	HIRA (interacts with) GALNT10	false
121181	interacts with	HIRA (interacts with) ALG10	false
121182	interacts with	HIRA (interacts with) UGDH	false
121183	interacts with	HOXA13 (interacts with) RTF1	false
121184	interacts with	HSF1 (interacts with) TSTA3	false
121185	interacts with	HSF1 (interacts with) GPAA1	false
121186	interacts with	HSF1 (interacts with) RFNG	false
121187	interacts with	HSF1 (interacts with) DPM2	false
121188	interacts with	HSF1 (interacts with) B4GALT2	false
121189	interacts with	HSF1 (interacts with) PIGQ	false
121190	interacts with	IKZF1 (interacts with) GALNT5	false
121191	interacts with	INO80 (interacts with) RTF1	false
121192	interacts with	IRF1 (interacts with) HK3	false
121193	interacts with	IRF1 (interacts with) LAMP3	false
121194	interacts with	IRF1 (interacts with) CHST11	false
121195	interacts with	IRF1 (interacts with) GALNT6	false
121196	interacts with	IRF2 (interacts with) LAMP3	false
121197	interacts with	IRF2 (interacts with) ST8SIA4	false
121198	interacts with	IRF2 (interacts with) FUT8	false
121199	interacts with	IRF3 (interacts with) B3GAT3	false
121200	interacts with	IRF3 (interacts with) RFNG	false
121201	interacts with	IRF3 (interacts with) PIGQ	false
121202	interacts with	IRF3 (interacts with) GALK1	false
121203	interacts with	ISL1 (interacts with) SULF2	false
121204	interacts with	ISL1 (interacts with) ST3GAL2	false
121205	interacts with	ISL1 (interacts with) CHST15	false
121206	interacts with	ISL1 (interacts with) SULF1	false
121207	interacts with	ISL1 (interacts with) MFNG	false
121208	interacts with	ISL1 (interacts with) HS3ST3B1	false
121209	interacts with	JMJD1C (interacts with) FUT11	false
121210	interacts with	JMJD1C (interacts with) STT3B	false
121211	interacts with	JMJD1C (interacts with) CSGALNACT2	false
121212	interacts with	JMJD1C (interacts with) NDST2	false
121213	interacts with	JMJD1C (interacts with) IDS	false
121214	interacts with	JUN (interacts with) HAS3	false
121215	interacts with	KAT2B (interacts with) SLC35A3	false
121216	interacts with	KAT2B (interacts with) FPGT	false
121217	interacts with	KAT2B (interacts with) MAN1A1	false
121218	interacts with	KAT2B (interacts with) COG6	false
121219	interacts with	KAT2B (interacts with) COG5	false
121220	interacts with	KAT2B (interacts with) CTBS	false
121221	interacts with	KAT2B (interacts with) GNE	false
121222	interacts with	KAT2B (interacts with) FUT10	false
121223	interacts with	KAT2B (interacts with) MAN2A1	false
121224	interacts with	KAT2B (interacts with) GNS	false
121225	interacts with	KDM1A (interacts with) UGDH	false
121226	interacts with	KDM1A (interacts with) B4GALNT4	false
121227	interacts with	KDM4A (interacts with) GANAB	false
121228	interacts with	KDM4A (interacts with) PIGO	false
121229	interacts with	KDM4C (interacts with) FKTN	false
121230	interacts with	KDM4C (interacts with) SLC35A3	false
121231	interacts with	KDM4C (interacts with) MAN1A2	false
121232	interacts with	KDM4C (interacts with) PIGO	false
121233	interacts with	KDM4C (interacts with) FUT11	false
121234	interacts with	KDM4C (interacts with) MAN2A1	false
121235	interacts with	KDM4C (interacts with) MAN2A2	false
121236	interacts with	KDM4C (interacts with) RTF1	false
121237	interacts with	KDM5A (interacts with) ALG10	false
121238	interacts with	KDM5A (interacts with) NEU3	false
121239	interacts with	KDM5A (interacts with) ALG10B	false
121240	interacts with	KDM5A (interacts with) MAN2A1	false
121241	interacts with	KDM5A (interacts with) SLC35A3	false
121242	interacts with	KDM5A (interacts with) FUT11	false
121243	interacts with	KDM5A (interacts with) COG5	false
121244	interacts with	KDM5A (interacts with) SLC35F5	false
121245	interacts with	KDM5A (interacts with) GNS	false
121246	interacts with	KDM5A (interacts with) RTF1	false
121247	interacts with	KDM5A (interacts with) SLC35A5	false
121248	interacts with	KDM5A (interacts with) GANAB	false
121249	interacts with	KDM5A (interacts with) SLC35E1	false
121250	interacts with	KDM5A (interacts with) GALNT4	false
121251	interacts with	KDM5A (interacts with) PIGO	false
121252	interacts with	KDM5B (interacts with) MAN1A2	false
121253	interacts with	KDM5B (interacts with) STT3B	false
121254	interacts with	KDM5B (interacts with) FUT11	false
121255	interacts with	KDM5B (interacts with) GANAB	false
121256	interacts with	KDM5B (interacts with) SLC35E1	false
121257	interacts with	KDM5B (interacts with) RTF1	false
121258	interacts with	KDM5B (interacts with) PIGO	false
121259	interacts with	KDM5B (interacts with) MAN2A2	false
121260	interacts with	KDM6B (interacts with) UGCG	false
121261	interacts with	KDM6B (interacts with) B4GALT5	false
121262	interacts with	KLF11 (interacts with) FAM20B	false
121263	interacts with	KLF11 (interacts with) FUT11	false
121264	interacts with	KLF11 (interacts with) STT3B	false
121265	interacts with	KLF11 (interacts with) B4GALT5	false
121266	interacts with	KLF11 (interacts with) UGCG	false
121267	interacts with	KLF11 (interacts with) B3GNT5	false
121268	interacts with	KLF11 (interacts with) MGAT3	false
121269	interacts with	KLF11 (interacts with) IDS	false
121270	interacts with	KLF11 (interacts with) XYLT1	false
121271	interacts with	KLF11 (interacts with) NDST1	false
121272	interacts with	KLF11 (interacts with) ST3GAL2	false
121273	interacts with	KLF5 (interacts with) GCNT3	false
121274	interacts with	KLF5 (interacts with) GCNT4	false
121275	interacts with	KLF5 (interacts with) ST3GAL5	false
121276	interacts with	KLF5 (interacts with) CHST3	false
121277	interacts with	KLF5 (interacts with) HAS2	false
121278	interacts with	LDB1 (interacts with) ST3GAL2	false
121279	interacts with	LDB1 (interacts with) POFUT1	false
121280	interacts with	LEF1 (interacts with) SULF1	false
121281	interacts with	LEF1 (interacts with) CHST11	false
121282	interacts with	LEF1 (interacts with) MAN1A1	false
121283	interacts with	LEO1 (interacts with) PIGW	false
121284	interacts with	LEO1 (interacts with) SLC35E3	false
121285	interacts with	MAZ (interacts with) DPM2	false
121286	interacts with	MAZ (interacts with) B3GALT6	false
121287	interacts with	MAZ (interacts with) B3GAT3	false
121288	interacts with	MAZ (interacts with) RFNG	false
121289	interacts with	MAZ (interacts with) PMM1	false
121290	interacts with	MBD3 (interacts with) DPM2	false
121291	interacts with	MBD3 (interacts with) PIGQ	false
121292	interacts with	MBD3 (interacts with) B3GAT3	false
121293	interacts with	MBD3 (interacts with) RFNG	false
121294	interacts with	MBD3 (interacts with) B4GALT7	false
121295	interacts with	MBD3 (interacts with) DPM3	false
121296	interacts with	MECOM (interacts with) ST3GAL2	false
121297	interacts with	MECOM (interacts with) B3GNT8	false
121298	interacts with	MECP2 (interacts with) IDS	false
121299	interacts with	MECP2 (interacts with) FUT11	false
121300	interacts with	MECP2 (interacts with) RTF1	false
121301	interacts with	MECP2 (interacts with) ST3GAL2	false
121302	interacts with	MED1 (interacts with) FUT11	false
121303	interacts with	MED1 (interacts with) GANAB	false
121304	interacts with	MED1 (interacts with) PIGO	false
121305	interacts with	MED12 (interacts with) RTF1	false
121306	interacts with	MED12 (interacts with) GANAB	false
121307	interacts with	MED12 (interacts with) FUT11	false
121308	interacts with	MED12 (interacts with) PIGO	false
121309	interacts with	MEF2A (interacts with) FUT11	false
121310	interacts with	MEF2A (interacts with) MGAT5	false
121311	interacts with	MEF2A (interacts with) MAN1A1	false
121312	interacts with	MEF2A (interacts with) GLCE	false
121313	interacts with	MEF2A (interacts with) ST6GALNAC3	false
121314	interacts with	MEF2A (interacts with) B4GALT5	false
121315	interacts with	MEF2A (interacts with) ST3GAL2	false
121316	interacts with	MEF2B (interacts with) SULT1A3	false
121317	interacts with	MEF2B (interacts with) DPM3	false
121318	interacts with	MEF2B (interacts with) B3GAT3	false
121319	interacts with	MEF2B (interacts with) PIGQ	false
121320	interacts with	MEF2B (interacts with) B3GALT6	false
121321	interacts with	MEF2D (interacts with) CHST3	false
121322	interacts with	MEIS1 (interacts with) CHST3	false
121323	interacts with	MEIS1 (interacts with) GFPT2	false
121324	interacts with	MEIS1 (interacts with) ST8SIA1	false
121325	interacts with	MEIS1 (interacts with) UST	false
121326	interacts with	MEIS1 (interacts with) SULF1	false
121327	interacts with	MEIS1 (interacts with) MGAT3	false
121328	interacts with	MEIS1 (interacts with) MAN1A1	false
121329	interacts with	MEIS1 (interacts with) MFNG	false
121330	interacts with	MEIS1 (interacts with) ST3GAL5	false
121331	interacts with	MEIS1 (interacts with) ST6GALNAC4	false
121332	interacts with	MEIS1 (interacts with) GCNT4	false
121333	interacts with	MEIS1 (interacts with) CHST2	false
121334	interacts with	MEIS1 (interacts with) GALNT9	false
121335	interacts with	MEIS1 (interacts with) HYAL1	false
121336	interacts with	MEIS1 (interacts with) EXT1	false
121337	interacts with	MEIS1 (interacts with) A4GALT	false
121338	interacts with	MEIS1 (interacts with) EXTL3	false
121339	interacts with	MLLT3 (interacts with) SLC35A3	false
121340	interacts with	MRE11A (interacts with) NEU3	false
121341	interacts with	MYH11 (interacts with) SULF1	false
121342	interacts with	MYH11 (interacts with) B4GALNT1	false
121343	interacts with	MYH11 (interacts with) CHST3	false
121344	interacts with	MYH11 (interacts with) HPSE2	false
121345	interacts with	MYH11 (interacts with) GFPT2	false
121346	interacts with	MYH11 (interacts with) ST6GALNAC3	false
121347	interacts with	MYH11 (interacts with) CHST2	false
121348	interacts with	MYH11 (interacts with) ST8SIA1	false
121349	interacts with	MYH11 (interacts with) CHST15	false
121350	interacts with	MYH11 (interacts with) A4GALT	false
121351	interacts with	MYH11 (interacts with) HK1	false
121352	interacts with	MYH11 (interacts with) B3GALT2	false
121353	interacts with	MYH11 (interacts with) HS3ST3A1	false
121354	interacts with	MYH11 (interacts with) SLC35F4	false
121355	interacts with	MYH11 (interacts with) SULF2	false
121356	interacts with	MYH11 (interacts with) GCNT4	false
121357	interacts with	MYH11 (interacts with) UST	false
121358	interacts with	MYH11 (interacts with) ST6GALNAC2	false
121359	interacts with	MYH11 (interacts with) ST6GALNAC4	false
121360	interacts with	MYH11 (interacts with) HS3ST3B1	false
121361	interacts with	MZF1 (interacts with) DPM3	false
121362	interacts with	NCOR1 (interacts with) SLC35D1	false
121363	interacts with	NCOR2 (interacts with) NDST1	false
121364	interacts with	NCOR2 (interacts with) MGAT5	false
121365	interacts with	NCOR2 (interacts with) XYLT1	false
121366	interacts with	NCOR2 (interacts with) MAN2A2	false
121367	interacts with	NFAT5 (interacts with) ACER2	false
121368	interacts with	NFIC (interacts with) MGAT5	false
121369	interacts with	NFIC (interacts with) FUT11	false
121370	interacts with	NFIC (interacts with) SLC35E1	false
121371	interacts with	NFIC (interacts with) NDST1	false
121372	interacts with	NFIC (interacts with) GALNT10	false
121373	interacts with	NFIC (interacts with) GANAB	false
121374	interacts with	NFIC (interacts with) PIGO	false
121375	interacts with	NFIC (interacts with) FKTN	false
121376	interacts with	NFIC (interacts with) RTF1	false
121377	interacts with	NFIC (interacts with) GNS	false
121378	interacts with	NFIC (interacts with) MAN2A2	false
121379	interacts with	NFIC (interacts with) ARSB	false
121380	interacts with	NFIC (interacts with) SLC35E3	false
121381	interacts with	NFIC (interacts with) B4GALT5	false
121382	interacts with	NFYA (interacts with) NEU3	false
121383	interacts with	NFYA (interacts with) NDST1	false
121384	interacts with	NFYA (interacts with) PIGA	false
121385	interacts with	NIPBL (interacts with) FUT11	false
121386	interacts with	NIPBL (interacts with) RTF1	false
121387	interacts with	NPAT (interacts with) FUT11	false
121388	interacts with	NPAT (interacts with) GALNT4	false
121389	interacts with	NR1H2 (interacts with) RFNG	false
121390	interacts with	NR1H2 (interacts with) DPM3	false
121391	interacts with	NR1H2 (interacts with) PIGQ	false
121392	interacts with	NR1H2 (interacts with) DPM2	false
121393	interacts with	NR1H2 (interacts with) CHST12	false
121394	interacts with	NR1H2 (interacts with) GALK1	false
121395	interacts with	NR1H2 (interacts with) B4GALT7	false
121396	interacts with	NR1H2 (interacts with) MGAT1	false
121397	interacts with	NR1H3 (interacts with) A4GALT	false
121398	interacts with	NR2C2 (interacts with) STT3B	false
121399	interacts with	NR2C2 (interacts with) FKTN	false
121400	interacts with	NR2C2 (interacts with) ALG10B	false
121401	interacts with	NR2C2 (interacts with) FUT11	false
121402	interacts with	NR2C2 (interacts with) FAM20B	false
121403	interacts with	NR2C2 (interacts with) SLC35A3	false
121404	interacts with	NR2C2 (interacts with) SLC35D1	false
121405	interacts with	NR2C2 (interacts with) SLC35B4	false
121406	interacts with	NR2C2 (interacts with) SLC35E1	false
121407	interacts with	NR2C2 (interacts with) PIGO	false
121408	interacts with	NR2C2 (interacts with) GALNT4	false
121409	interacts with	NR2C2 (interacts with) GANAB	false
121410	interacts with	NR2C2 (interacts with) ALG11	false
121411	interacts with	NR2F1 (interacts with) CHST3	false
121412	interacts with	NR2F1 (interacts with) GFPT2	false
121413	interacts with	NR2F1 (interacts with) CHST15	false
121414	interacts with	NR2F1 (interacts with) ST6GALNAC3	false
121415	interacts with	NR2F1 (interacts with) SULF1	false
121416	interacts with	NR2F1 (interacts with) HS3ST3A1	false
121417	interacts with	NR2F1 (interacts with) SULF2	false
121418	interacts with	NR2F1 (interacts with) B3GNT9	false
121419	interacts with	NR2F1 (interacts with) MFNG	false
121420	interacts with	NR2F1 (interacts with) GAL3ST3	false
121421	interacts with	NR2F1 (interacts with) MGAT3	false
121422	interacts with	NR2F1 (interacts with) GAL3ST4	false
121423	interacts with	NR2F1 (interacts with) GALNT6	false
121424	interacts with	NR2F1 (interacts with) ST6GALNAC4	false
121425	interacts with	NR2F1 (interacts with) CHST6	false
121426	interacts with	NR2F1 (interacts with) ST6GALNAC2	false
121427	interacts with	NR2F1 (interacts with) B4GALNT1	false
121428	interacts with	NR2F1 (interacts with) B4GALT5	false
121429	interacts with	NR2F2 (interacts with) CSGALNACT2	false
121430	interacts with	NR2F2 (interacts with) FUT11	false
121431	interacts with	NR2F2 (interacts with) SULT1C4	false
121432	interacts with	NR2F2 (interacts with) ARSB	false
121433	interacts with	NR2F2 (interacts with) XYLT1	false
121434	interacts with	NR2F2 (interacts with) ST6GALNAC3	false
121435	interacts with	NR2F2 (interacts with) GCNT4	false
121436	interacts with	NR2F2 (interacts with) LIPA	false
121437	interacts with	NR2F2 (interacts with) HS3ST3B1	false
121438	interacts with	NR2F2 (interacts with) ST3GAL2	false
121439	interacts with	NR2F2 (interacts with) SULF2	false
121440	interacts with	NR2F2 (interacts with) FUT8	false
121441	interacts with	NR2F2 (interacts with) MGAT5	false
121442	interacts with	NR5A2 (interacts with) ST6GALNAC3	false
121443	interacts with	NR5A2 (interacts with) ST8SIA4	false
121444	interacts with	NR5A2 (interacts with) MAN1A1	false
121445	interacts with	NR5A2 (interacts with) GCNT4	false
121446	interacts with	NR5A2 (interacts with) CHST3	false
121447	interacts with	PBX1 (interacts with) MAN1A2	false
121448	interacts with	PBX1 (interacts with) GLCE	false
121449	interacts with	PBX1 (interacts with) GCNT4	false
121450	interacts with	PBX1 (interacts with) MAN1A1	false
121451	interacts with	PBX1 (interacts with) MAN2A1	false
121452	interacts with	PBX1 (interacts with) CHST15	false
121453	interacts with	PBX1 (interacts with) CHST3	false
121454	interacts with	PBX1 (interacts with) B4GALT5	false
121455	interacts with	PBX1 (interacts with) FUT10	false
121456	interacts with	PBX1 (interacts with) GFPT2	false
121457	interacts with	PBX1 (interacts with) HS3ST3B1	false
121458	interacts with	PBX1 (interacts with) B3GALT2	false
121459	interacts with	PBX1 (interacts with) UST	false
121460	interacts with	PBX1 (interacts with) ST8SIA1	false
121461	interacts with	PBX1 (interacts with) LIPA	false
121462	interacts with	PBX1 (interacts with) SULF2	false
121463	interacts with	PBX1 (interacts with) HAS2	false
121464	interacts with	PCGF1 (interacts with) RFNG	false
121465	interacts with	PCGF1 (interacts with) IDUA	false
121466	interacts with	PHF20 (interacts with) POFUT1	false
121467	interacts with	PHF20 (interacts with) UGCG	false
121468	interacts with	PHF20 (interacts with) FUT11	false
121469	interacts with	PHF20 (interacts with) SLC35A3	false
121470	interacts with	PHF20 (interacts with) RTF1	false
121471	interacts with	PHF20 (interacts with) SLC35E3	false
121472	interacts with	PHF6 (interacts with) SLC35F5	false
121473	interacts with	PHF8 (interacts with) COG5	false
121474	interacts with	PHF8 (interacts with) ACER2	false
121475	interacts with	PHF8 (interacts with) STT3B	false
121476	interacts with	PHF8 (interacts with) MAN1A2	false
121477	interacts with	PHF8 (interacts with) FKTN	false
121478	interacts with	PHF8 (interacts with) GFPT1	false
121479	interacts with	PHF8 (interacts with) MGAT2	false
121480	interacts with	PHF8 (interacts with) GNE	false
121481	interacts with	PHF8 (interacts with) SLC35A3	false
121482	interacts with	PHF8 (interacts with) NEU3	false
121483	interacts with	PHF8 (interacts with) SLC35E1	false
121484	interacts with	PHF8 (interacts with) SLC35F5	false
121485	interacts with	PHF8 (interacts with) ALG10	false
121486	interacts with	PHF8 (interacts with) GNPNAT1	false
121487	interacts with	PHF8 (interacts with) EXTL2	false
121488	interacts with	PHF8 (interacts with) PIGM	false
121489	interacts with	PIAS1 (interacts with) MGAT5	false
121490	interacts with	PIAS1 (interacts with) ACER2	false
121491	interacts with	PIAS1 (interacts with) UGCG	false
121492	interacts with	PIAS1 (interacts with) FUT11	false
121493	interacts with	PIAS1 (interacts with) ALG10	false
121494	interacts with	PIAS1 (interacts with) SLC35A3	false
121495	interacts with	PIAS1 (interacts with) FKTN	false
121496	interacts with	PIAS1 (interacts with) FUT10	false
121497	interacts with	PIAS1 (interacts with) GALNT4	false
121498	interacts with	PIAS1 (interacts with) PIGO	false
121499	interacts with	PIAS1 (interacts with) GLCE	false
121500	interacts with	PIAS1 (interacts with) ARSB	false
121501	interacts with	PIAS1 (interacts with) NDST4	false
121502	interacts with	POLR2B (interacts with) MAN1A2	false
121503	interacts with	POLR2B (interacts with) MAN2A1	false
121504	interacts with	POLR2B (interacts with) RTF1	false
121505	interacts with	POLR2B (interacts with) GANAB	false
121506	interacts with	POLR2B (interacts with) FUT11	false
121507	interacts with	POLR2B (interacts with) PIGO	false
121508	interacts with	POLR3A (interacts with) MGAT5	false
121509	interacts with	POLR3A (interacts with) NEU3	false
121510	interacts with	POLR3A (interacts with) MAN2A1	false
121511	interacts with	POLR3A (interacts with) UGCG	false
121512	interacts with	POLR3A (interacts with) ACER2	false
121513	interacts with	POLR3A (interacts with) COG5	false
121514	interacts with	POLR3A (interacts with) GANAB	false
121515	interacts with	POLR3A (interacts with) SLC35E3	false
121516	interacts with	POLR3A (interacts with) PIGN	false
121517	interacts with	POLR3A (interacts with) RTF1	false
121518	interacts with	POLR3A (interacts with) SLC35D1	false
121519	interacts with	POLR3A (interacts with) GFPT1	false
121520	interacts with	POLR3A (interacts with) MAN2A2	false
121521	interacts with	POLR3A (interacts with) LIPA	false
121522	interacts with	PPARA (interacts with) STT3B	false
121523	interacts with	PPARA (interacts with) MAN2A1	false
121524	interacts with	PRDM4 (interacts with) MGAT5	false
121525	interacts with	PRDM4 (interacts with) ACER2	false
121526	interacts with	PRKDC (interacts with) ALG10	false
121527	interacts with	PRKDC (interacts with) RTF1	false
121528	interacts with	PRKDC (interacts with) FUT11	false
121529	interacts with	PRKDC (interacts with) GANAB	false
121530	interacts with	PRKDC (interacts with) PIGN	false
121531	interacts with	PRKDC (interacts with) NDST1	false
121532	interacts with	PRKDC (interacts with) PIGM	false
121533	interacts with	PRKDC (interacts with) SLC35F5	false
121534	interacts with	PRKDC (interacts with) POFUT1	false
121535	interacts with	PRKDC (interacts with) HS3ST3B1	false
121536	interacts with	PRKDC (interacts with) PIGO	false
121537	interacts with	PRKDC (interacts with) ALG10B	false
121538	interacts with	PRKDC (interacts with) GALNT10	false
121539	interacts with	PRKDC (interacts with) GLCE	false
121540	interacts with	PRKDC (interacts with) FUT8	false
121541	interacts with	PRKDC (interacts with) NDST2	false
121542	interacts with	PRKDC (interacts with) CSGALNACT2	false
121543	interacts with	RAC3 (interacts with) DPM2	false
121544	interacts with	RBBP5 (interacts with) MAN1A2	false
121545	interacts with	RBBP5 (interacts with) FUT11	false
121546	interacts with	RBBP5 (interacts with) ACER2	false
121547	interacts with	RBBP5 (interacts with) SLC35A3	false
121548	interacts with	RBBP5 (interacts with) SLC35E1	false
121549	interacts with	RBBP5 (interacts with) GANAB	false
121550	interacts with	RBBP5 (interacts with) PIGO	false
121551	interacts with	RBBP5 (interacts with) RTF1	false
121552	interacts with	RBBP5 (interacts with) GNS	false
121553	interacts with	RBL2 (interacts with) ALG10B	false
121554	interacts with	RBL2 (interacts with) SLC35A5	false
121555	interacts with	RBL2 (interacts with) ALG10	false
121556	interacts with	RBL2 (interacts with) SLC35A3	false
121557	interacts with	RBL2 (interacts with) STT3B	false
121558	interacts with	RBL2 (interacts with) MAN2A1	false
121559	interacts with	RBL2 (interacts with) FPGT	false
121560	interacts with	RBL2 (interacts with) PIGN	false
121561	interacts with	RBL2 (interacts with) SLC35D1	false
121562	interacts with	RBL2 (interacts with) MAN1A2	false
121563	interacts with	RBL2 (interacts with) SLC35E3	false
121564	interacts with	RBL2 (interacts with) ACER2	false
121565	interacts with	RBL2 (interacts with) UGGT1	false
121566	interacts with	RBL2 (interacts with) GALNT4	false
121567	interacts with	RBL2 (interacts with) GNS	false
121568	interacts with	RBL2 (interacts with) PIGO	false
121569	interacts with	RCOR1 (interacts with) SLC35A3	false
121570	interacts with	RCOR1 (interacts with) MAN2A1	false
121571	interacts with	RCOR1 (interacts with) FKTN	false
121572	interacts with	RCOR1 (interacts with) NEU3	false
121573	interacts with	RCOR1 (interacts with) MAN1A2	false
121574	interacts with	RCOR1 (interacts with) ACER2	false
121575	interacts with	RCOR1 (interacts with) UGCG	false
121576	interacts with	RCOR1 (interacts with) POFUT1	false
121577	interacts with	RCOR1 (interacts with) SLC35E3	false
121578	interacts with	RCOR1 (interacts with) UGDH	false
121579	interacts with	RCOR1 (interacts with) NDST1	false
121580	interacts with	RCOR1 (interacts with) PIGO	false
121581	interacts with	RCOR1 (interacts with) XYLT1	false
121582	interacts with	RELA (interacts with) CHPF2	false
121583	interacts with	REST (interacts with) FUT11	false
121584	interacts with	RNF2 (interacts with) FAM20B	false
121585	interacts with	RNF2 (interacts with) STT3B	false
121586	interacts with	RNF2 (interacts with) SLC35A5	false
121587	interacts with	RNF2 (interacts with) MAN1A2	false
121588	interacts with	RNF2 (interacts with) FPGT	false
121589	interacts with	RNF2 (interacts with) SLC35F5	false
121590	interacts with	RNF2 (interacts with) COG5	false
121591	interacts with	RNF2 (interacts with) GALNT1	false
121592	interacts with	RNF2 (interacts with) SLC35A3	false
121593	interacts with	RNF2 (interacts with) FUT11	false
121594	interacts with	RNF2 (interacts with) PIGM	false
121595	interacts with	RNF2 (interacts with) FKTN	false
121596	interacts with	RNF2 (interacts with) CHSY1	false
121597	interacts with	RNF2 (interacts with) PIGW	false
121598	interacts with	RNF2 (interacts with) RTF1	false
121599	interacts with	RNF2 (interacts with) EXT2	false
121600	interacts with	RORA (interacts with) B4GALT5	false
121601	interacts with	RUNX2 (interacts with) CHST15	false
121602	interacts with	RUNX2 (interacts with) SULF2	false
121603	interacts with	RUNX2 (interacts with) CHST3	false
121604	interacts with	RUNX2 (interacts with) B3GNT9	false
121605	interacts with	RUNX2 (interacts with) B4GALT1	false
121606	interacts with	RYBP (interacts with) ACER2	false
121607	interacts with	RYBP (interacts with) COG5	false
121608	interacts with	SATB1 (interacts with) MGAT5	false
121609	interacts with	SATB1 (interacts with) STT3B	false
121610	interacts with	SATB1 (interacts with) FUT11	false
121611	interacts with	SATB1 (interacts with) MAN2A1	false
121612	interacts with	SATB1 (interacts with) PIGO	false
121613	interacts with	SFMBT1 (interacts with) STT3B	false
121614	interacts with	SFMBT1 (interacts with) CSGALNACT2	false
121615	interacts with	SIN3A (interacts with) RTF1	false
121616	interacts with	SIN3A (interacts with) FUT11	false
121617	interacts with	SIRT6 (interacts with) DPM2	false
121618	interacts with	SIRT6 (interacts with) B3GAT3	false
121619	interacts with	SIRT6 (interacts with) RFNG	false
121620	interacts with	SIRT6 (interacts with) PIGQ	false
121621	interacts with	SIRT6 (interacts with) B4GALT7	false
121622	interacts with	SIRT6 (interacts with) GALK1	false
121623	interacts with	SIRT6 (interacts with) B3GALT6	false
121624	interacts with	SIX5 (interacts with) PIGQ	false
121625	interacts with	SIX5 (interacts with) B3GALT6	false
121626	interacts with	SIX5 (interacts with) RFNG	false
121627	interacts with	SMAD4 (interacts with) SLC35D1	false
121628	interacts with	SMAD4 (interacts with) COG6	false
121629	interacts with	SMAD4 (interacts with) COG5	false
121630	interacts with	SMAD4 (interacts with) ACER2	false
121631	interacts with	SMAD4 (interacts with) MAN2A1	false
121632	interacts with	SMAD4 (interacts with) NEU3	false
121633	interacts with	SMARCA4 (interacts with) MOGS	false
121634	interacts with	SMARCA4 (interacts with) MGAT4B	false
121635	interacts with	SMARCC1 (interacts with) FKTN	false
121636	interacts with	SMARCC1 (interacts with) RTF1	false
121637	interacts with	SMARCC1 (interacts with) ALG10	false
121638	interacts with	SMARCC1 (interacts with) UGGT1	false
121639	interacts with	SMARCC1 (interacts with) UGCG	false
121640	interacts with	SMARCC1 (interacts with) FAM20B	false
121641	interacts with	SMARCC1 (interacts with) SLC35A3	false
121642	interacts with	SMARCC1 (interacts with) COG5	false
121643	interacts with	SMARCC1 (interacts with) GANAB	false
121644	interacts with	SMARCC1 (interacts with) NDST1	false
121645	interacts with	SMARCC1 (interacts with) ALG10B	false
121646	interacts with	SMARCC1 (interacts with) GNPNAT1	false
121647	interacts with	SMARCC1 (interacts with) SLC35A5	false
121648	interacts with	SMARCC1 (interacts with) SLC17A5	false
121649	interacts with	SMARCC1 (interacts with) PIGO	false
121650	interacts with	SMARCC2 (interacts with) OGT	false
121651	interacts with	SMARCC2 (interacts with) ALG10B	false
121652	interacts with	SMARCC2 (interacts with) MAN2A2	false
121653	interacts with	SMARCC2 (interacts with) RTF1	false
121654	interacts with	SMARCC2 (interacts with) FKTN	false
121655	interacts with	SOX2 (interacts with) ST6GALNAC2	false
121656	interacts with	SOX2 (interacts with) GALNT6	false
121657	interacts with	SOX9 (interacts with) B3GNT5	false
121658	interacts with	SP2 (interacts with) PIGO	false
121659	interacts with	SP2 (interacts with) MAN1A2	false
121660	interacts with	SP2 (interacts with) STT3B	false
121661	interacts with	SP2 (interacts with) ALG10	false
121662	interacts with	SP2 (interacts with) MAN2A2	false
121663	interacts with	SP2 (interacts with) POFUT1	false
121664	interacts with	SP2 (interacts with) GALNT10	false
121665	interacts with	SP2 (interacts with) GNS	false
121666	interacts with	SREBF2 (interacts with) GANAB	false
121667	interacts with	SREBF2 (interacts with) SLC35E1	false
121668	interacts with	SREBF2 (interacts with) SLC35E3	false
121669	interacts with	SREBF2 (interacts with) NDST1	false
121670	interacts with	SREBF2 (interacts with) PIGO	false
121671	interacts with	SREBF2 (interacts with) SLC35A3	false
121672	interacts with	SREBF2 (interacts with) PIGG	false
121673	interacts with	SREBF2 (interacts with) ALG10	false
121674	interacts with	SREBF2 (interacts with) FUT11	false
121675	interacts with	SREBF2 (interacts with) MGAT2	false
121676	interacts with	SRF (interacts with) CHST3	false
121677	interacts with	SRF (interacts with) CHST2	false
121678	interacts with	SRF (interacts with) HAS3	false
121679	interacts with	SRF (interacts with) HS3ST3A1	false
121680	interacts with	SRF (interacts with) GFPT2	false
121681	interacts with	SRF (interacts with) ST6GALNAC4	false
121682	interacts with	SRF (interacts with) A4GALT	false
121683	interacts with	SRF (interacts with) HAS2	false
121684	interacts with	SRF (interacts with) SULF2	false
121685	interacts with	SRF (interacts with) ST6GALNAC2	false
121686	interacts with	SRF (interacts with) B4GALNT1	false
121687	interacts with	SRF (interacts with) SLC35F4	false
121688	interacts with	SRF (interacts with) GAL3ST3	false
121689	interacts with	SRF (interacts with) B3GNT7	false
121690	interacts with	STAT3 (interacts with) MGAT5	false
121691	interacts with	STAT3 (interacts with) UGCG	false
121692	interacts with	STAT3 (interacts with) NEU3	false
121693	interacts with	STAT3 (interacts with) MAN2A1	false
121694	interacts with	STAT3 (interacts with) FUT11	false
121695	interacts with	STAT3 (interacts with) STT3B	false
121696	interacts with	STAT3 (interacts with) UGGT1	false
121697	interacts with	STAT3 (interacts with) MAN1A2	false
121698	interacts with	STAT3 (interacts with) GNS	false
121699	interacts with	STAT3 (interacts with) B4GALT5	false
121700	interacts with	STAT3 (interacts with) MAN1A1	false
121701	interacts with	STAT3 (interacts with) PIGO	false
121702	interacts with	STAT3 (interacts with) HK1	false
121703	interacts with	STAT3 (interacts with) GALNT10	false
121704	interacts with	STAT3 (interacts with) B4GALT1	false
121705	interacts with	STAT3 (interacts with) CHST15	false
121706	interacts with	STAT3 (interacts with) LIPA	false
121707	interacts with	STAT3 (interacts with) HS3ST3B1	false
121708	interacts with	STAT3 (interacts with) CHST11	false
121709	interacts with	STAT5B (interacts with) MGAT5	false
121710	interacts with	STAT5B (interacts with) MAN1A1	false
121711	interacts with	STAT5B (interacts with) FUT4	false
121712	interacts with	STAT5B (interacts with) ARSB	false
121713	interacts with	STAT5B (interacts with) ST8SIA1	false
121714	interacts with	STAT5B (interacts with) ST3GAL2	false
121715	interacts with	STAT5B (interacts with) B4GALT6	false
121716	interacts with	STAT5B (interacts with) ST8SIA4	false
121717	interacts with	STAT5B (interacts with) HS3ST3B1	false
121718	interacts with	STAT5B (interacts with) GCNT4	false
121719	interacts with	STAT5B (interacts with) CHST3	false
121720	interacts with	STAT5B (interacts with) CHST15	false
121721	interacts with	STAT5B (interacts with) B4GALT5	false
121722	interacts with	STAT5B (interacts with) UST	false
121723	interacts with	STAT5B (interacts with) B3GALT2	false
121724	interacts with	STAT5B (interacts with) CHST11	false
121725	interacts with	STAT5B (interacts with) SULF2	false
121726	interacts with	STAT5B (interacts with) B3GNT9	false
121727	interacts with	STAT5B (interacts with) EXT1	false
121728	interacts with	STAT6 (interacts with) CHST3	false
121729	interacts with	STAT6 (interacts with) HS3ST3A1	false
121730	interacts with	SUMO1 (interacts with) PIGY	false
121731	interacts with	SUMO2 (interacts with) PIGY	false
121732	interacts with	SVIL (interacts with) FUT10	false
121733	interacts with	TAF1 (interacts with) MAN1A2	false
121734	interacts with	TAF1 (interacts with) FUT11	false
121735	interacts with	TAF1 (interacts with) RTF1	false
121736	interacts with	TAF1 (interacts with) UGCG	false
121737	interacts with	TBP (interacts with) NDST2	false
121738	interacts with	TCF12 (interacts with) FUT11	false
121739	interacts with	TCF12 (interacts with) RTF1	false
121740	interacts with	TCF12 (interacts with) GLCE	false
121741	interacts with	TCF21 (interacts with) MFNG	false
121742	interacts with	TCF21 (interacts with) GFPT2	false
121743	interacts with	TCF21 (interacts with) CHST3	false
121744	interacts with	TCF21 (interacts with) TPST1	false
121745	interacts with	TCF21 (interacts with) GAL3ST4	false
121746	interacts with	TCF21 (interacts with) B3GNT9	false
121747	interacts with	TCF21 (interacts with) ST3GAL2	false
121748	interacts with	TCF21 (interacts with) EXTL1	false
121749	interacts with	TCF21 (interacts with) UST	false
121750	interacts with	TCF21 (interacts with) DSE	false
121751	interacts with	TCF21 (interacts with) SULF2	false
121752	interacts with	TCF21 (interacts with) ST6GALNAC4	false
121753	interacts with	TCF21 (interacts with) EXT1	false
121754	interacts with	TCF21 (interacts with) HYAL1	false
121755	interacts with	TCF7 (interacts with) CHST15	false
121756	interacts with	TCF7 (interacts with) LAMP3	false
121757	interacts with	TCF7 (interacts with) CHST11	false
121758	interacts with	TCF7 (interacts with) GCNT4	false
121759	interacts with	TCF7 (interacts with) MAN1A1	false
121760	interacts with	TCF7 (interacts with) GALNT6	false
121761	interacts with	TCF7 (interacts with) GFPT2	false
121762	interacts with	TCF7 (interacts with) UST	false
121763	interacts with	TCF7 (interacts with) HS3ST3A1	false
121764	interacts with	TCF7L1 (interacts with) EXT1	false
121765	interacts with	TCF7L1 (interacts with) CHST3	false
121766	interacts with	TCF7L1 (interacts with) ST6GALNAC3	false
121767	interacts with	TCF7L1 (interacts with) GFPT2	false
121768	interacts with	TCF7L1 (interacts with) MFNG	false
121769	interacts with	TCF7L1 (interacts with) MGAT3	false
121770	interacts with	TCF7L1 (interacts with) SULF1	false
121771	interacts with	TCF7L1 (interacts with) CHST1	false
121772	interacts with	TCF7L1 (interacts with) GALNT9	false
121773	interacts with	TCF7L1 (interacts with) CHST15	false
121774	interacts with	TCF7L1 (interacts with) ST8SIA1	false
121775	interacts with	TCF7L1 (interacts with) ST3GAL5	false
121776	interacts with	TCF7L1 (interacts with) B3GNT8	false
121777	interacts with	TCF7L1 (interacts with) ST6GALNAC2	false
121778	interacts with	TCF7L1 (interacts with) CHST6	false
121779	interacts with	TCF7L1 (interacts with) HYAL1	false
121780	interacts with	TCF7L1 (interacts with) GCNT4	false
121781	interacts with	TCF7L1 (interacts with) GALNT6	false
121782	interacts with	TCF7L1 (interacts with) HAS2	false
121783	interacts with	TCF7L1 (interacts with) SLC35E4	false
121784	interacts with	TCF7L2 (interacts with) GALNT4	false
121785	interacts with	TCF7L2 (interacts with) IDS	false
121786	interacts with	TERF1 (interacts with) FAM20B	false
121787	interacts with	TERF1 (interacts with) STT3B	false
121788	interacts with	TERF1 (interacts with) FKTN	false
121789	interacts with	TERF1 (interacts with) POFUT1	false
121790	interacts with	TERF1 (interacts with) NDST1	false
121791	interacts with	TERF1 (interacts with) CSGALNACT2	false
121792	interacts with	TET2 (interacts with) MAN1A2	false
121793	interacts with	TET2 (interacts with) STT3B	false
121794	interacts with	TET2 (interacts with) COG5	false
121795	interacts with	TET2 (interacts with) FUT11	false
121796	interacts with	TET2 (interacts with) ACER2	false
121797	interacts with	TET2 (interacts with) UGCG	false
121798	interacts with	TET2 (interacts with) SLC35D1	false
121799	interacts with	TET2 (interacts with) SLC35A3	false
121800	interacts with	TET2 (interacts with) GLCE	false
121801	interacts with	TET2 (interacts with) POFUT1	false
121802	interacts with	TFCP2 (interacts with) PIGO	false
121803	interacts with	TFDP1 (interacts with) RTF1	false
121804	interacts with	TFDP1 (interacts with) GANAB	false
121805	interacts with	TFDP1 (interacts with) UGDH	false
121806	interacts with	TOP1 (interacts with) GANAB	false
121807	interacts with	TOP1 (interacts with) GNB1	false
121808	interacts with	TP63 (interacts with) HAS3	false
121809	interacts with	TP63 (interacts with) ST6GALNAC2	false
121810	interacts with	TP63 (interacts with) GCNT3	false
121811	interacts with	TP63 (interacts with) CHST15	false
121812	interacts with	TP63 (interacts with) CHST3	false
121813	interacts with	TP63 (interacts with) GALNT5	false
121814	interacts with	TP63 (interacts with) ST3GAL5	false
121815	interacts with	TP63 (interacts with) B3GNT8	false
121816	interacts with	TP63 (interacts with) B3GNT9	false
121817	interacts with	TP63 (interacts with) ABO	false
121818	interacts with	TP63 (interacts with) FUT3	false
121819	interacts with	TP63 (interacts with) B3GALT2	false
121820	interacts with	TP63 (interacts with) HK1	false
121821	interacts with	TP63 (interacts with) SULF2	false
121822	interacts with	TRIM28 (interacts with) GPAA1	false
121823	interacts with	TRIM28 (interacts with) B4GALT2	false
121824	interacts with	TRIM28 (interacts with) B4GALT7	false
121825	interacts with	TRIM28 (interacts with) PIGQ	false
121826	interacts with	TRIM28 (interacts with) B4GALNT4	false
121827	interacts with	TRIM28 (interacts with) MGAT4B	false
121828	interacts with	TRRAP (interacts with) FUT11	false
121829	interacts with	TRRAP (interacts with) RTF1	false
121830	interacts with	TRRAP (interacts with) PIGO	false
121831	interacts with	USF2 (interacts with) DPM3	false
121832	interacts with	USF2 (interacts with) IDUA	false
121833	interacts with	USF2 (interacts with) B3GALT6	false
121834	interacts with	USF2 (interacts with) RFNG	false
121835	interacts with	USF2 (interacts with) B4GALT2	false
121836	interacts with	USF2 (interacts with) B4GALNT4	false
121837	interacts with	USF2 (interacts with) MGAT4B	false
121838	interacts with	VEZF1 (interacts with) ALG10	false
121839	interacts with	VEZF1 (interacts with) SLC35A5	false
121840	interacts with	VEZF1 (interacts with) UGCG	false
121841	interacts with	VEZF1 (interacts with) GNS	false
121842	interacts with	VEZF1 (interacts with) NDST2	false
121843	interacts with	VEZF1 (interacts with) GALNT4	false
121844	interacts with	VEZF1 (interacts with) SLC35E3	false
121845	interacts with	VEZF1 (interacts with) LIPA	false
121846	interacts with	VEZF1 (interacts with) FUT4	false
121847	interacts with	WDR5 (interacts with) MGAT4B	false
121848	interacts with	WDR5 (interacts with) PIGL	false
121849	interacts with	WWTR1 (interacts with) MAN2A1	false
121850	interacts with	WWTR1 (interacts with) FUT11	false
121851	interacts with	WWTR1 (interacts with) IDS	false
121852	interacts with	WWTR1 (interacts with) GALNT5	false
121853	interacts with	WWTR1 (interacts with) GALNT4	false
121854	interacts with	WWTR1 (interacts with) SLC35D1	false
121855	interacts with	WWTR1 (interacts with) UGCG	false
121856	interacts with	WWTR1 (interacts with) GLCE	false
121857	interacts with	WWTR1 (interacts with) ARSB	false
121858	interacts with	WWTR1 (interacts with) SULT1C4	false
121859	interacts with	WWTR1 (interacts with) CHST11	false
121860	interacts with	WWTR1 (interacts with) GNS	false
121861	interacts with	WWTR1 (interacts with) PAPSS2	false
121862	interacts with	WWTR1 (interacts with) GALNT10	false
121863	interacts with	WWTR1 (interacts with) ST6GALNAC3	false
121864	interacts with	WWTR1 (interacts with) LIPA	false
121865	interacts with	WWTR1 (interacts with) ALG10	false
121866	interacts with	WWTR1 (interacts with) EXT1	false
121867	interacts with	WWTR1 (interacts with) B3GALT5	false
121868	interacts with	XRN2 (interacts with) STT3B	false
121869	interacts with	XRN2 (interacts with) MAN2A1	false
121870	interacts with	XRN2 (interacts with) MAN1A2	false
121871	interacts with	XRN2 (interacts with) FUT11	false
121872	interacts with	XRN2 (interacts with) GANAB	false
121873	interacts with	XRN2 (interacts with) SLC35E1	false
121874	interacts with	XRN2 (interacts with) PIGO	false
121875	interacts with	XRN2 (interacts with) RTF1	false
121876	interacts with	YAP1 (interacts with) MAN2A1	false
121877	interacts with	YAP1 (interacts with) CHST15	false
121878	interacts with	YAP1 (interacts with) CSGALNACT2	false
121879	interacts with	YAP1 (interacts with) GLCE	false
121880	interacts with	YAP1 (interacts with) HS3ST3B1	false
121881	interacts with	YAP1 (interacts with) ST3GAL2	false
121882	interacts with	YY1 (interacts with) SLC35F5	false
121883	interacts with	YY1 (interacts with) STT3B	false
121884	interacts with	YY1 (interacts with) PIGW	false
121885	interacts with	YY1 (interacts with) FKTN	false
121886	interacts with	YY1 (interacts with) POFUT1	false
121887	interacts with	ZBTB10 (interacts with) ALG10	false
121888	interacts with	ZBTB10 (interacts with) SLC35F5	false
121889	interacts with	ZBTB17 (interacts with) RFNG	false
121890	interacts with	ZBTB17 (interacts with) PIGQ	false
121891	interacts with	ZBTB17 (interacts with) B3GAT3	false
121892	interacts with	ZBTB17 (interacts with) DPM3	false
121893	interacts with	ZBTB17 (interacts with) IDUA	false
121894	interacts with	ZBTB17 (interacts with) B4GALT7	false
121895	interacts with	ZBTB17 (interacts with) GALK1	false
121896	interacts with	ZBTB17 (interacts with) SLC35C2	false
121897	interacts with	ZBTB17 (interacts with) B4GALT2	false
121898	interacts with	ZBTB17 (interacts with) DPM2	false
121899	interacts with	ZBTB17 (interacts with) GALT	false
121900	interacts with	ZBTB17 (interacts with) NAGK	false
121901	interacts with	ZBTB33 (interacts with) ALG10	false
121902	interacts with	ZBTB33 (interacts with) ALG10B	false
121903	interacts with	ZBTB33 (interacts with) SLC35F5	false
121904	interacts with	ZBTB33 (interacts with) FUT11	false
121905	interacts with	ZBTB33 (interacts with) GANAB	false
121906	interacts with	ZBTB33 (interacts with) PIGO	false
