# Supplementary material for: A systems-based framework to computationally describe putative transcription factors and signaling pathways regulating glycan biosynthesis
Source: publisher site journal article supplement (doi:10.3762/bjoc.17.119), 2021-07-22
Supplement: Additional file 2 [file 1860-5397-17-119-S2.cys › CytoscapeSession-2021_03_21-12_01/tables/120744-PRAD/LOCAL_ATTRS-org.cytoscape.model.CyNode-PRAD+default+node.cytable]

CyCSV-Version	1
SUID	name	nodeType	selected
java.lang.Long	java.lang.String	java.lang.String	java.lang.Boolean
		mutable
PRAD default node
105686	AFF4	TF	false
105687	MAN1A2	Glycogene	false
105688	STT3B	Glycogene	false
105689	NEU3	Glycogene	false
105690	FUT11	Glycogene	false
105691	ACER2	Glycogene	false
105692	COG5	Glycogene	false
105985	UGCG	Glycogene	false
105697	GALNT10	Glycogene	false
105950	SLC35D1	Glycogene	false
106844	SLC35E1	Glycogene	false
105874	PIGO	Glycogene	false
113210	ALKBH3	TF	false
105754	B3GAT3	Glycogene	false
105722	DPM3	Glycogene	false
105693	AR	TF	false
105694	MAN2A1	Glycogene	false
105731	FAM20B	Glycogene	false
105699	ARID2	TF	false
105700	RTF1	Glycogene	false
108548	ARNT2	TF	false
105727	ALG10B	Glycogene	false
105998	GANAB	Glycogene	false
106837	ASCL2	TF	false
106839	ST6GALNAC4	Glycogene	false
108032	B3GNT9	Glycogene	false
105701	ATF1	TF	false
105696	SLC35F5	Glycogene	false
105703	GALNT4	Glycogene	false
105704	ATF2	TF	false
105706	ATF3	TF	false
105941	HAS3	Glycogene	false
108550	ATF4	TF	false
105744	RFNG	Glycogene	false
105758	DPM2	Glycogene	false
105782	B4GALT7	Glycogene	false
105749	IDUA	Glycogene	false
105759	PIGQ	Glycogene	false
105781	B3GALT6	Glycogene	false
105712	ATRX	TF	false
105713	FKTN	Glycogene	false
107973	AUTS2	TF	false
105778	GAL3ST4	Glycogene	false
105714	BACH1	TF	false
105715	CSGALNACT2	Glycogene	false
105716	MAN1A1	Glycogene	false
110788	BCOR	TF	false
105748	MAN2A2	Glycogene	false
105726	BMI1	TF	false
105711	ALG10	Glycogene	false
106014	GALNT1	Glycogene	false
105695	SLC35A3	Glycogene	false
105851	GLCE	Glycogene	false
105733	BRD1	TF	false
105772	NDST2	Glycogene	false
105771	OGT	Glycogene	false
107327	POFUT2	Glycogene	false
107276	BRD2	TF	false
108551	UGDH	Glycogene	false
105792	POFUT1	Glycogene	false
106005	COG1	Glycogene	false
105923	NDST1	Glycogene	false
107277	BRD3	TF	false
106843	BRD4	TF	false
105736	C17orf49	TF	false
105738	CASP8AP2	TF	false
106845	CBFA2T3	TF	false
105740	GALNS	Glycogene	false
105745	CBX7	TF	false
105766	MFNG	Glycogene	false
106858	GCNT4	Glycogene	false
106861	CHST15	Glycogene	false
105807	CHST3	Glycogene	false
114933	SLC35F4	Glycogene	false
112225	ST6GALNAC2	Glycogene	false
108590	GAL3ST3	Glycogene	false
105836	UST	Glycogene	false
105841	HS3ST3B1	Glycogene	false
107990	B4GALNT1	Glycogene	false
106848	CDK12	TF	false
105756	CDK8	TF	false
105732	SLC35E3	Glycogene	false
105757	CDK9	TF	false
105765	NAGK	Glycogene	false
105764	CEBPA	TF	false
108002	NANS	Glycogene	false
105797	ALG3	Glycogene	false
108563	CEBPD	TF	false
105724	MGAT1	Glycogene	false
107983	B3GNT8	Glycogene	false
108564	CEBPZ	TF	false
105769	CHD1	TF	false
105707	B3GNT5	Glycogene	false
105770	CHD2	TF	false
105774	CHD8	TF	false
106849	CLOCK	TF	false
105780	CPSF3L	TF	false
106851	GALT	Glycogene	false
105735	PMM1	Glycogene	false
105785	CREB1	TF	false
105786	CREB3	TF	false
105787	GMPPA	Glycogene	false
106030	B3GALT4	Glycogene	false
109680	NAGLU	Glycogene	false
111095	CREB3L2	TF	false
105788	CREB3L4	TF	false
105790	CREBBP	TF	false
108568	CSNK2A1	TF	false
105793	CTBP1	TF	false
105880	TSTA3	Glycogene	false
105794	CTNNB1	TF	false
107279	B4GALT5	Glycogene	false
107307	EXT2	Glycogene	false
105905	GNS	Glycogene	false
105843	ARSB	Glycogene	false
106850	DCP1A	TF	false
110793	DDIT3	TF	false
120754	DLX1	TF	false
107282	DNMT3A	TF	false
105893	MGAT5	Glycogene	false
108571	DR1	TF	false
120755	DYRK1A	TF	false
105730	PIGN	Glycogene	false
105804	EBF1	TF	false
105815	ST6GALNAC3	Glycogene	false
105806	ST3GAL2	Glycogene	false
105979	SULF2	Glycogene	false
108010	CHST1	Glycogene	false
105709	HAS2	Glycogene	false
105751	HYAL1	Glycogene	false
106887	EXTL1	Glycogene	false
106883	SULF1	Glycogene	false
105808	B3GALT2	Glycogene	false
105718	CHST11	Glycogene	false
108580	EXT1	Glycogene	false
105922	IDS	Glycogene	false
105813	EGLN2	TF	false
105819	EHF	TF	false
105705	UGGT1	Glycogene	false
106859	GALNT7	Glycogene	false
105954	PIGM	Glycogene	false
105827	ELK4	TF	false
105823	COG3	Glycogene	false
106852	ELL2	TF	false
105844	EXTL2	Glycogene	false
105829	EP400	TF	false
107292	ERCC3	TF	false
105830	ERCC6	TF	false
105832	ERG	TF	false
105805	CSGALNACT1	Glycogene	false
107328	PAPSS2	Glycogene	false
108014	MGAT5B	Glycogene	false
105720	ST6GAL2	Glycogene	false
112230	ARSD	Glycogene	false
112219	ESR1	TF	false
105719	GFPT2	Glycogene	false
108033	HS3ST3A1	Glycogene	false
108561	GALNT6	Glycogene	false
110794	ESRRA	TF	false
111098	ETS2	TF	false
105846	EZH1	TF	false
105840	ST8SIA1	Glycogene	false
105838	CHST2	Glycogene	false
105850	FOXA1	TF	false
108000	GALNT3	Glycogene	false
106868	MGAT2	Glycogene	false
106882	GFPT1	Glycogene	false
105855	GNPNAT1	Glycogene	false
108005	SLC17A5	Glycogene	false
107974	GALNT11	Glycogene	false
105856	FOXO1	TF	false
105779	DSE	Glycogene	false
105810	FUT4	Glycogene	false
107278	FUT10	Glycogene	false
105861	GABPA	TF	false
105976	FPGT	Glycogene	false
109677	GATA3	TF	false
112223	B3GNT3	Glycogene	false
105776	LAMP3	Glycogene	false
107287	FUT2	Glycogene	false
107289	FUT3	Glycogene	false
105930	CHST6	Glycogene	false
120756	SLC35D3	Glycogene	false
105862	GATA6	TF	false
105809	TPST1	Glycogene	false
105863	GATAD1	TF	false
108578	PIGL	Glycogene	false
107991	GLI1	TF	false
114937	GLI3	TF	false
105866	GLYR1	TF	false
105791	COG7	Glycogene	false
120757	GMEB1	TF	false
106866	GRHL1	TF	false
105870	GTF2F1	TF	false
105871	GTF2I	TF	false
105824	COG6	Glycogene	false
105973	COG2	Glycogene	false
108591	HBP1	TF	false
105873	HCFC1	TF	false
107303	HDAC1	TF	false
107999	B3GNT6	Glycogene	false
108592	HDAC2	TF	false
105875	HECTD1	TF	false
111101	HES1	TF	false
107993	HEYL	TF	false
106867	HIF1A	TF	false
105717	CHSY1	Glycogene	false
108595	HIRA	TF	false
106854	XYLT1	Glycogene	false
118332	HOXA13	TF	false
105879	HSF1	TF	false
105881	GPAA1	Glycogene	false
105917	B4GALT2	Glycogene	false
105882	IKZF1	TF	false
106027	GALNT5	Glycogene	false
105885	INO80	TF	false
105887	IRF1	TF	false
105859	HK3	Glycogene	false
106871	IRF2	TF	false
105834	ST8SIA4	Glycogene	false
107976	FUT8	Glycogene	false
106872	IRF3	TF	false
105753	GALK1	Glycogene	false
118334	ISL1	TF	false
105892	JMJD1C	TF	false
105895	JUN	TF	false
107312	KAT2B	TF	false
105869	CTBS	Glycogene	false
107297	GNE	Glycogene	false
105901	KDM1A	TF	false
105784	B4GALNT4	Glycogene	false
106874	KDM4A	TF	false
107997	KDM4C	TF	false
105904	KDM5A	TF	false
105702	SLC35A5	Glycogene	false
105907	KDM5B	TF	false
107315	KDM6B	TF	false
107316	KLF11	TF	false
105750	MGAT3	Glycogene	false
107318	KLF5	TF	false
108003	GCNT3	Glycogene	false
106857	ST3GAL5	Glycogene	false
107320	LDB1	TF	false
106875	LEF1	TF	false
113227	LEO1	TF	false
105729	PIGW	Glycogene	false
105916	MAZ	TF	false
107323	MBD3	TF	false
105919	MECOM	TF	false
105921	MECP2	TF	false
105924	MED1	TF	false
107324	MED12	TF	false
105925	MEF2A	TF	false
106877	MEF2B	TF	false
108594	SULT1A3	Glycogene	false
107325	MEF2D	TF	false
105928	MEIS1	TF	false
108605	GALNT9	Glycogene	false
105768	A4GALT	Glycogene	false
107299	EXTL3	Glycogene	false
110800	MLLT3	TF	false
105931	MRE11A	TF	false
105937	MYH11	TF	false
105817	HPSE2	Glycogene	false
107293	HK1	Glycogene	false
105942	MZF1	TF	false
108603	NCOR1	TF	false
107326	NCOR2	TF	false
105943	NFAT5	TF	false
105945	NFIC	TF	false
107329	NFYA	TF	false
108027	PIGA	Glycogene	false
105947	NIPBL	TF	false
105948	NPAT	TF	false
109685	NR1H2	TF	false
105763	CHST12	Glycogene	false
110807	NR1H3	TF	false
105949	NR2C2	TF	false
105845	SLC35B4	Glycogene	false
107300	ALG11	Glycogene	false
105951	NR2F1	TF	false
108017	NR2F2	TF	false
105837	SULT1C4	Glycogene	false
105884	LIPA	Glycogene	false
105952	NR5A2	TF	false
105953	PBX1	TF	false
105955	PCGF1	TF	false
105956	PHF20	TF	false
105957	PHF6	TF	false
107334	PHF8	TF	false
105958	PIAS1	TF	false
114934	NDST4	Glycogene	false
105959	POLR2B	TF	false
105960	POLR3A	TF	false
106881	PPARA	TF	false
108021	PRDM4	TF	false
105963	PRKDC	TF	false
105964	RAC3	TF	false
105967	RBBP5	TF	false
105968	RBL2	TF	false
105969	RCOR1	TF	false
108024	RELA	TF	false
108007	CHPF2	Glycogene	false
105970	REST	TF	false
105975	RNF2	TF	false
105977	RORA	TF	false
105981	RUNX2	TF	false
107274	B4GALT1	Glycogene	false
107338	RYBP	TF	false
108614	SATB1	TF	false
108615	SFMBT1	TF	false
105984	SIN3A	TF	false
106885	SIRT6	TF	false
105986	SIX5	TF	false
105987	SMAD4	TF	false
107343	SMARCA4	TF	false
105762	MOGS	Glycogene	false
105918	MGAT4B	Glycogene	false
107344	SMARCC1	TF	false
105988	SMARCC2	TF	false
107345	SOX2	TF	false
108621	SOX9	TF	false
107346	SP2	TF	false
105995	SREBF2	TF	false
109689	PIGG	Glycogene	false
105996	SRF	TF	false
108004	B3GNT7	Glycogene	false
107347	STAT3	TF	false
108029	STAT5B	TF	false
107331	B4GALT6	Glycogene	false
107348	STAT6	TF	false
112231	SUMO1	TF	false
107332	PIGY	Glycogene	false
106004	SUMO2	TF	false
107349	SVIL	TF	false
106006	TAF1	TF	false
108030	TBP	TF	false
106007	TCF12	TF	false
108031	TCF21	TF	false
106008	TCF7	TF	false
106009	TCF7L1	TF	false
111112	SLC35E4	Glycogene	false
106010	TCF7L2	TF	false
106015	TERF1	TF	false
106016	TET2	TF	false
107355	TFCP2	TF	false
108036	TFDP1	TF	false
110814	TOP1	TF	false
105902	GNB1	Glycogene	false
106017	TP63	TF	false
107319	ABO	Glycogene	false
106018	TRIM28	TF	false
108628	TRRAP	TF	false
106022	USF2	TF	false
106023	VEZF1	TF	false
106024	WDR5	TF	false
108630	WWTR1	TF	false
108034	B3GALT5	Glycogene	false
106025	XRN2	TF	false
106026	YAP1	TF	false
106028	YY1	TF	false
106894	ZBTB10	TF	false
106029	ZBTB17	TF	false
107986	SLC35C2	Glycogene	false
106031	ZBTB33	TF	false
