# Supplementary material for: A systems-based framework to computationally describe putative transcription factors and signaling pathways regulating glycan biosynthesis
Source: publisher site journal article supplement (doi:10.3762/bjoc.17.119), 2021-07-22
Supplement: Additional file 2 [file 1860-5397-17-119-S2.cys › CytoscapeSession-2021_03_21-12_01/tables/121907-SARC/LOCAL_ATTRS-org.cytoscape.model.CyEdge-SARC+default+edge.cytable]

CyCSV-Version	1
SUID	interaction	name	selected
java.lang.Long	java.lang.String	java.lang.String	java.lang.Boolean
SARC default edge
121917	interacts with	ADNP (interacts with) FUT7	false
121918	interacts with	AFF4 (interacts with) MAN1A2	false
121919	interacts with	AFF4 (interacts with) STT3B	false
121920	interacts with	AFF4 (interacts with) NEU3	false
121921	interacts with	AFF4 (interacts with) ACER2	false
121922	interacts with	AFF4 (interacts with) GNE	false
121923	interacts with	ASH2L (interacts with) RTF1	false
121924	interacts with	ASH2L (interacts with) PIGX	false
121925	interacts with	ATF1 (interacts with) FUT11	false
121926	interacts with	ATF2 (interacts with) MAN1A2	false
121927	interacts with	ATF2 (interacts with) MAN2A1	false
121928	interacts with	ATF2 (interacts with) FUT11	false
121929	interacts with	ATF2 (interacts with) ACER2	false
121930	interacts with	ATF2 (interacts with) RTF1	false
121931	interacts with	ATF4 (interacts with) PMM1	false
121932	interacts with	ATF5 (interacts with) NEU1	false
121933	interacts with	ATF7IP (interacts with) ALG10	false
121934	interacts with	BACH2 (interacts with) UST	false
121935	interacts with	BACH2 (interacts with) EXTL2	false
121936	interacts with	BACH2 (interacts with) EXT2	false
121937	interacts with	BATF (interacts with) FUT7	false
121938	interacts with	BATF (interacts with) NAGK	false
121939	interacts with	BATF (interacts with) FUCA1	false
121940	interacts with	BATF (interacts with) LAMP3	false
121941	interacts with	BATF (interacts with) MGAT1	false
121942	interacts with	BATF (interacts with) ST3GAL5	false
121943	interacts with	BATF (interacts with) ST8SIA4	false
121944	interacts with	BATF (interacts with) NAAA	false
121945	interacts with	BATF (interacts with) MGAT4A	false
121946	interacts with	BATF (interacts with) CTSA	false
121947	interacts with	BATF (interacts with) GBGT1	false
121948	interacts with	BATF (interacts with) GM2A	false
121949	interacts with	BATF (interacts with) NANS	false
121950	interacts with	BATF (interacts with) GALNT6	false
121951	interacts with	BATF (interacts with) TPST2	false
121952	interacts with	BATF (interacts with) GLA	false
121953	interacts with	BATF (interacts with) DPM2	false
121954	interacts with	BATF (interacts with) B3GNT7	false
121955	interacts with	BATF (interacts with) HAS1	false
121956	interacts with	BATF (interacts with) GCNT1	false
121957	interacts with	BATF (interacts with) NAGA	false
121958	interacts with	BCAT1 (interacts with) GCNT1	false
121959	interacts with	BCAT1 (interacts with) UGDH	false
121960	interacts with	BCAT1 (interacts with) SLC35C1	false
121961	interacts with	BCL3 (interacts with) NANS	false
121962	interacts with	BCL3 (interacts with) MFNG	false
121963	interacts with	BCL3 (interacts with) HAS1	false
121964	interacts with	BCL3 (interacts with) FUT7	false
121965	interacts with	BCL3 (interacts with) MAN2B1	false
121966	interacts with	BCL3 (interacts with) RENBP	false
121967	interacts with	BCL3 (interacts with) NAGK	false
121968	interacts with	BCL3 (interacts with) FUCA1	false
121969	interacts with	BCL3 (interacts with) DPM2	false
121970	interacts with	BCL3 (interacts with) GFPT2	false
121971	interacts with	BCL3 (interacts with) MGAT1	false
121972	interacts with	BCOR (interacts with) MAN2A2	false
121973	interacts with	BMI1 (interacts with) ALG10B	false
121974	interacts with	BMI1 (interacts with) CSGALNACT2	false
121975	interacts with	BMI1 (interacts with) GALNT4	false
121976	interacts with	BMI1 (interacts with) GFPT1	false
121977	interacts with	BMI1 (interacts with) B3GALNT1	false
121978	interacts with	BRCA1 (interacts with) PIGW	false
121979	interacts with	BRCA1 (interacts with) ALG10	false
121980	interacts with	BRCA1 (interacts with) SLC35A3	false
121981	interacts with	BRCA1 (interacts with) STT3B	false
121982	interacts with	BRCA1 (interacts with) GNE	false
121983	interacts with	BRD1 (interacts with) ALG12	false
121984	interacts with	BRD1 (interacts with) RTF1	false
121985	interacts with	BRD1 (interacts with) ACER2	false
121986	interacts with	BRD1 (interacts with) SLC35A1	false
121987	interacts with	BRD1 (interacts with) NEU3	false
121988	interacts with	BRD3 (interacts with) RTF1	false
121989	interacts with	BRD3 (interacts with) MAN1A2	false
121990	interacts with	BRD3 (interacts with) B3GALNT2	false
121991	interacts with	BRD4 (interacts with) SLC35E1	false
121992	interacts with	BRD4 (interacts with) STT3B	false
121993	interacts with	BRD4 (interacts with) MAN2A2	false
121994	interacts with	BRD4 (interacts with) MAN1A2	false
121995	interacts with	BRD4 (interacts with) NEU3	false
121996	interacts with	BRD4 (interacts with) RTF1	false
121997	interacts with	BRD4 (interacts with) FKTN	false
121998	interacts with	BRD4 (interacts with) SLC35A3	false
121999	interacts with	BTAF1 (interacts with) ALG10	false
122000	interacts with	C17orf49 (interacts with) B3GAT3	false
122001	interacts with	C17orf49 (interacts with) SLC35B1	false
122002	interacts with	CASP8AP2 (interacts with) ALG10B	false
122003	interacts with	CBFA2T3 (interacts with) LFNG	false
122004	interacts with	CBFA2T3 (interacts with) ST3GAL5	false
122005	interacts with	CBFB (interacts with) CSGALNACT2	false
122006	interacts with	CBFB (interacts with) ST3GAL2	false
122007	interacts with	CBFB (interacts with) GNB1	false
122008	interacts with	CBFB (interacts with) SLC35B1	false
122009	interacts with	CBFB (interacts with) UXS1	false
122010	interacts with	CBFB (interacts with) GALNS	false
122011	interacts with	CBFB (interacts with) GFPT1	false
122012	interacts with	CBFB (interacts with) SLC17A5	false
122013	interacts with	CBFB (interacts with) FUT11	false
122014	interacts with	CBFB (interacts with) CHSY1	false
122015	interacts with	CBX6 (interacts with) RTF1	false
122016	interacts with	CBX7 (interacts with) MAN1C1	false
122017	interacts with	CBX7 (interacts with) ST6GAL1	false
122018	interacts with	CBX7 (interacts with) MAN2A2	false
122019	interacts with	CBX7 (interacts with) FAM20B	false
122020	interacts with	CBX7 (interacts with) KHK	false
122021	interacts with	CBX7 (interacts with) B3GALT4	false
122022	interacts with	CBX7 (interacts with) B3GALNT2	false
122023	interacts with	CBX7 (interacts with) PIGP	false
122024	interacts with	CBX7 (interacts with) RTF1	false
122025	interacts with	CCDC101 (interacts with) KHK	false
122026	interacts with	CD59 (interacts with) RENBP	false
122027	interacts with	CDK8 (interacts with) STT3B	false
122028	interacts with	CDK8 (interacts with) NEU3	false
122029	interacts with	CDK8 (interacts with) MAN1A2	false
122030	interacts with	CDK8 (interacts with) SLC35A3	false
122031	interacts with	CDK8 (interacts with) RTF1	false
122032	interacts with	CDK8 (interacts with) SLC35E1	false
122033	interacts with	CDK9 (interacts with) DPM2	false
122034	interacts with	CDK9 (interacts with) PIGQ	false
122035	interacts with	CDK9 (interacts with) ST6GALNAC6	false
122036	interacts with	CDK9 (interacts with) POMT1	false
122037	interacts with	CDK9 (interacts with) ST6GALNAC4	false
122038	interacts with	CEBPB (interacts with) CTSA	false
122039	interacts with	CEBPB (interacts with) TPST2	false
122040	interacts with	CEBPB (interacts with) NEU1	false
122041	interacts with	CEBPB (interacts with) HK3	false
122042	interacts with	CEBPB (interacts with) MGAT1	false
122043	interacts with	CEBPB (interacts with) GBGT1	false
122044	interacts with	CEBPB (interacts with) GBA	false
122045	interacts with	CEBPB (interacts with) NAGK	false
122046	interacts with	CEBPB (interacts with) ALG3	false
122047	interacts with	CEBPB (interacts with) NANS	false
122048	interacts with	CEBPB (interacts with) NPL	false
122049	interacts with	CEBPB (interacts with) HAS1	false
122050	interacts with	CEBPB (interacts with) HEXB	false
122051	interacts with	CEBPB (interacts with) GLA	false
122052	interacts with	CEBPB (interacts with) HEXA	false
122053	interacts with	CEBPB (interacts with) FUCA1	false
122054	interacts with	CEBPB (interacts with) DPM2	false
122055	interacts with	CEBPD (interacts with) MGAT1	false
122056	interacts with	CHD1 (interacts with) OGT	false
122057	interacts with	CHD1 (interacts with) RTF1	false
122058	interacts with	CHD1 (interacts with) NEU3	false
122059	interacts with	CHD1 (interacts with) SLC35A3	false
122060	interacts with	CHD1 (interacts with) ALG13	false
122061	interacts with	CHD1 (interacts with) ACER2	false
122062	interacts with	CHD1 (interacts with) MAN2A2	false
122063	interacts with	CHD1 (interacts with) PIGW	false
122064	interacts with	CHD1 (interacts with) COG1	false
122065	interacts with	CHD1 (interacts with) GNE	false
122066	interacts with	CHD2 (interacts with) MAN1A2	false
122067	interacts with	CHD2 (interacts with) OGT	false
122068	interacts with	CHD4 (interacts with) NEU3	false
122069	interacts with	CHD8 (interacts with) NEU3	false
122070	interacts with	CHD8 (interacts with) STT3B	false
122071	interacts with	CHD8 (interacts with) RTF1	false
122072	interacts with	CHD8 (interacts with) OGT	false
122073	interacts with	CIITA (interacts with) FUT7	false
122074	interacts with	CIITA (interacts with) LAMP3	false
122075	interacts with	CIITA (interacts with) MAN2B1	false
122076	interacts with	CPSF3L (interacts with) B3GALT6	false
122077	interacts with	CPSF3L (interacts with) B3GAT3	false
122078	interacts with	CPSF3L (interacts with) POMGNT1	false
122079	interacts with	CREB3 (interacts with) KHK	false
122080	interacts with	CREB3L2 (interacts with) FUT11	false
122081	interacts with	CREBBP (interacts with) NEU3	false
122082	interacts with	CREBBP (interacts with) ACER2	false
122083	interacts with	CREBBP (interacts with) RTF1	false
122084	interacts with	CTNNB1 (interacts with) NEU3	false
122085	interacts with	CTNNB1 (interacts with) PAPSS1	false
122086	interacts with	DEK (interacts with) STT3B	false
122087	interacts with	DYRK1A (interacts with) ACER2	false
122088	interacts with	E2F1 (interacts with) PIGX	false
122089	interacts with	E2F3 (interacts with) COG6	false
122090	interacts with	E2F4 (interacts with) COG4	false
122091	interacts with	E2F4 (interacts with) ALG3	false
122092	interacts with	E2F4 (interacts with) DPM2	false
122093	interacts with	E2F4 (interacts with) SLC35B1	false
122094	interacts with	E2F4 (interacts with) NANS	false
122095	interacts with	E2F4 (interacts with) ALG5	false
122096	interacts with	E2F7 (interacts with) PIGW	false
122097	interacts with	E2F7 (interacts with) SLC35A3	false
122098	interacts with	E2F7 (interacts with) STT3B	false
122099	interacts with	E2F7 (interacts with) RTF1	false
122100	interacts with	E2F7 (interacts with) SLC35D1	false
122101	interacts with	EBF1 (interacts with) CHST7	false
122102	interacts with	EBNA1BP2 (interacts with) DPM1	false
122103	interacts with	EBNA1BP2 (interacts with) DDOST	false
122104	interacts with	EGLN2 (interacts with) DPM2	false
122105	interacts with	ELK3 (interacts with) FUT11	false
122106	interacts with	EP400 (interacts with) FKTN	false
122107	interacts with	EP400 (interacts with) STT3B	false
122108	interacts with	EP400 (interacts with) OGT	false
122109	interacts with	EP400 (interacts with) ACER2	false
122110	interacts with	EP400 (interacts with) PIGO	false
122111	interacts with	ERCC3 (interacts with) FKTN	false
122112	interacts with	ERG (interacts with) FUT1	false
122113	interacts with	ERG (interacts with) CHST1	false
122114	interacts with	ETS1 (interacts with) NDST1	false
122115	interacts with	ETS1 (interacts with) LIPA	false
122116	interacts with	ETS1 (interacts with) CHST15	false
122117	interacts with	ETS1 (interacts with) FUT1	false
122118	interacts with	ETS1 (interacts with) GNB1	false
122119	interacts with	ETV4 (interacts with) SLC35B1	false
122120	interacts with	ETV7 (interacts with) MAN2B1	false
122121	interacts with	ETV7 (interacts with) MGAT1	false
122122	interacts with	EZH1 (interacts with) OGT	false
122123	interacts with	EZH1 (interacts with) SLC35A1	false
122124	interacts with	EZH1 (interacts with) RTF1	false
122125	interacts with	EZH1 (interacts with) KHK	false
122126	interacts with	EZH1 (interacts with) B3GALNT2	false
122127	interacts with	EZH1 (interacts with) PIGP	false
122128	interacts with	EZH2 (interacts with) PIGW	false
122129	interacts with	EZH2 (interacts with) PIGX	false
122130	interacts with	EZH2 (interacts with) PIGA	false
122131	interacts with	EZH2 (interacts with) RTF1	false
122132	interacts with	EZH2 (interacts with) FKTN	false
122133	interacts with	FLI1 (interacts with) MFNG	false
122134	interacts with	FLI1 (interacts with) ST8SIA4	false
122135	interacts with	FLI1 (interacts with) MGAT4A	false
122136	interacts with	FLI1 (interacts with) FUCA1	false
122137	interacts with	FLI1 (interacts with) CHST15	false
122138	interacts with	FLI1 (interacts with) ST3GAL5	false
122139	interacts with	FLI1 (interacts with) NDST2	false
122140	interacts with	FLI1 (interacts with) FUT1	false
122141	interacts with	FLI1 (interacts with) HYAL2	false
122142	interacts with	FLI1 (interacts with) GALC	false
122143	interacts with	FOSL1 (interacts with) TPST2	false
122144	interacts with	FOSL1 (interacts with) NANS	false
122145	interacts with	FOSL1 (interacts with) GCNT1	false
122146	interacts with	FOSL1 (interacts with) ALG3	false
122147	interacts with	FOSL1 (interacts with) DPM2	false
122148	interacts with	FOSL1 (interacts with) PMM2	false
122149	interacts with	FOSL1 (interacts with) DAD1	false
122150	interacts with	FOSL1 (interacts with) MAN1B1	false
122151	interacts with	FOXK1 (interacts with) GNE	false
122152	interacts with	FOXK1 (interacts with) OGT	false
122153	interacts with	FOXP3 (interacts with) FUT7	false
122154	interacts with	GABPA (interacts with) SLC35A5	false
122155	interacts with	GABPA (interacts with) ALG10B	false
122156	interacts with	GABPA (interacts with) COG3	false
122157	interacts with	GABPA (interacts with) PIGN	false
122158	interacts with	GABPA (interacts with) SLC35A1	false
122159	interacts with	GABPA (interacts with) ALG10	false
122160	interacts with	GABPA (interacts with) FUT10	false
122161	interacts with	GABPA (interacts with) GNE	false
122162	interacts with	GABPA (interacts with) ACER2	false
122163	interacts with	GAPDH (interacts with) GPI	false
122164	interacts with	GLI2 (interacts with) ST3GAL2	false
122165	interacts with	GLI2 (interacts with) GLCE	false
122166	interacts with	GMEB1 (interacts with) ALG10	false
122167	interacts with	GPS2 (interacts with) GALK1	false
122168	interacts with	GPS2 (interacts with) NANS	false
122169	interacts with	H2AFX (interacts with) B3GAT3	false
122170	interacts with	H2AFX (interacts with) GALE	false
122171	interacts with	H2AFX (interacts with) NANS	false
122172	interacts with	HCFC1 (interacts with) NEU3	false
122173	interacts with	HCFC1 (interacts with) PIGO	false
122174	interacts with	HCFC1 (interacts with) MAN1A2	false
122175	interacts with	HCFC1 (interacts with) RTF1	false
122176	interacts with	HCFC1 (interacts with) GNE	false
122177	interacts with	HDAC6 (interacts with) OGT	false
122178	interacts with	HDAC6 (interacts with) PIGA	false
122179	interacts with	HEY1 (interacts with) CHST15	false
122180	interacts with	HIF1A (interacts with) SLC35D1	false
122181	interacts with	HIRA (interacts with) STT3B	false
122182	interacts with	HOXA1 (interacts with) PMM2	false
122183	interacts with	HOXA1 (interacts with) CHPF	false
122184	interacts with	HOXA1 (interacts with) UGDH	false
122185	interacts with	HOXA1 (interacts with) SLC35B1	false
122186	interacts with	HSF1 (interacts with) TSTA3	false
122187	interacts with	HSF1 (interacts with) GPAA1	false
122188	interacts with	IKZF1 (interacts with) MFNG	false
122189	interacts with	IKZF1 (interacts with) ST8SIA4	false
122190	interacts with	IKZF1 (interacts with) LAMP3	false
122191	interacts with	IKZF1 (interacts with) MGAT4A	false
122192	interacts with	IKZF1 (interacts with) MAN2B1	false
122193	interacts with	IKZF1 (interacts with) GM2A	false
122194	interacts with	IKZF1 (interacts with) FUT7	false
122195	interacts with	IKZF1 (interacts with) ST3GAL5	false
122196	interacts with	IKZF1 (interacts with) ST6GAL1	false
122197	interacts with	IKZF1 (interacts with) FUCA1	false
122198	interacts with	IKZF1 (interacts with) NDST2	false
122199	interacts with	IKZF1 (interacts with) LIPA	false
122200	interacts with	IKZF1 (interacts with) NAGK	false
122201	interacts with	IKZF1 (interacts with) GALNT6	false
122202	interacts with	IKZF1 (interacts with) NAAA	false
122203	interacts with	IKZF1 (interacts with) B3GALT4	false
122204	interacts with	INO80 (interacts with) RTF1	false
122205	interacts with	INO80 (interacts with) GALK2	false
122206	interacts with	IRF1 (interacts with) HK3	false
122207	interacts with	IRF1 (interacts with) LAMP3	false
122208	interacts with	IRF1 (interacts with) NAGK	false
122209	interacts with	IRF1 (interacts with) HPSE	false
122210	interacts with	IRF2 (interacts with) ST6GAL1	false
122211	interacts with	IRF3 (interacts with) B3GAT3	false
122212	interacts with	IRF3 (interacts with) GALK1	false
122213	interacts with	IRF3 (interacts with) ALG3	false
122214	interacts with	IRF3 (interacts with) GLA	false
122215	interacts with	IRF3 (interacts with) B4GALT7	false
122216	interacts with	IRF3 (interacts with) FUT7	false
122217	interacts with	IRF5 (interacts with) HK3	false
122218	interacts with	IRF5 (interacts with) FUT7	false
122219	interacts with	IRF5 (interacts with) MFNG	false
122220	interacts with	IRF5 (interacts with) MAN2B1	false
122221	interacts with	IRF5 (interacts with) MGAT1	false
122222	interacts with	IRF5 (interacts with) GBGT1	false
122223	interacts with	IRF5 (interacts with) GM2A	false
122224	interacts with	IRF5 (interacts with) NAAA	false
122225	interacts with	IRF5 (interacts with) CTSA	false
122226	interacts with	IRF5 (interacts with) NAGA	false
122227	interacts with	IRF5 (interacts with) ARSA	false
122228	interacts with	IRF5 (interacts with) B3GALT4	false
122229	interacts with	IRF5 (interacts with) CHST13	false
122230	interacts with	IRF5 (interacts with) LAMP3	false
122231	interacts with	IRF5 (interacts with) B3GNT7	false
122232	interacts with	IRF5 (interacts with) TPST2	false
122233	interacts with	IRF5 (interacts with) HEXA	false
122234	interacts with	IRF5 (interacts with) ST3GAL5	false
122235	interacts with	IRF8 (interacts with) HK3	false
122236	interacts with	IRF8 (interacts with) ST8SIA4	false
122237	interacts with	IRF8 (interacts with) LIPA	false
122238	interacts with	IRF8 (interacts with) MGAT4A	false
122239	interacts with	IRF8 (interacts with) FUCA1	false
122240	interacts with	IRF8 (interacts with) NAAA	false
122241	interacts with	IRF8 (interacts with) GM2A	false
122242	interacts with	IRF8 (interacts with) GCNT1	false
122243	interacts with	IRF8 (interacts with) GALNT6	false
122244	interacts with	IRF8 (interacts with) TPST2	false
122245	interacts with	IRF8 (interacts with) HAS1	false
122246	interacts with	JDP2 (interacts with) UGDH	false
122247	interacts with	JMJD1C (interacts with) FUT11	false
122248	interacts with	JMJD1C (interacts with) STT3B	false
122249	interacts with	JMJD1C (interacts with) CSGALNACT2	false
122250	interacts with	JMJD1C (interacts with) MAN1A2	false
122251	interacts with	JMJD1C (interacts with) NEU3	false
122252	interacts with	JMJD1C (interacts with) MGAT5	false
122253	interacts with	JMJD1C (interacts with) GALNT4	false
122254	interacts with	JMJD1C (interacts with) FUT10	false
122255	interacts with	JMJD1C (interacts with) SLC35A5	false
122256	interacts with	JMJD6 (interacts with) PMM1	false
122257	interacts with	JMJD6 (interacts with) DPM3	false
122258	interacts with	JUND (interacts with) DPM3	false
122259	interacts with	JUND (interacts with) DPM2	false
122260	interacts with	KAT2B (interacts with) SLC35A3	false
122261	interacts with	KAT2B (interacts with) NEU3	false
122262	interacts with	KAT2B (interacts with) FPGT	false
122263	interacts with	KAT2B (interacts with) STT3B	false
122264	interacts with	KAT2B (interacts with) ACER2	false
122265	interacts with	KAT2B (interacts with) SLC35A1	false
122266	interacts with	KAT2B (interacts with) RTF1	false
122267	interacts with	KAT2B (interacts with) MAN2A2	false
122268	interacts with	KAT2B (interacts with) ST6GAL1	false
122269	interacts with	KAT2B (interacts with) KHK	false
122270	interacts with	KAT5 (interacts with) KHK	false
122271	interacts with	KDM1A (interacts with) DDOST	false
122272	interacts with	KDM1A (interacts with) GANAB	false
122273	interacts with	KDM3A (interacts with) FKTN	false
122274	interacts with	KDM3A (interacts with) SLC35A3	false
122275	interacts with	KDM3A (interacts with) GNE	false
122276	interacts with	KDM4C (interacts with) MAN1A2	false
122277	interacts with	KDM4C (interacts with) GNE	false
122278	interacts with	KDM5A (interacts with) ALG10	false
122279	interacts with	KDM5A (interacts with) NEU3	false
122280	interacts with	KDM5A (interacts with) ALG10B	false
122281	interacts with	KDM5A (interacts with) MAN2A1	false
122282	interacts with	KDM5A (interacts with) RTF1	false
122283	interacts with	KDM5A (interacts with) COG3	false
122284	interacts with	KDM5C (interacts with) RTF1	false
122285	interacts with	KDM5C (interacts with) NEU3	false
122286	interacts with	KDM5C (interacts with) STT3B	false
122287	interacts with	KDM5C (interacts with) MAN1A2	false
122288	interacts with	KDM5C (interacts with) SLC35E1	false
122289	interacts with	KLF11 (interacts with) FAM20B	false
122290	interacts with	KLF11 (interacts with) ACER2	false
122291	interacts with	KLF11 (interacts with) RTF1	false
122292	interacts with	KLF15 (interacts with) ST6GAL1	false
122293	interacts with	KLF4 (interacts with) UAP1	false
122294	interacts with	KLF4 (interacts with) UGDH	false
122295	interacts with	KLF4 (interacts with) HAS1	false
122296	interacts with	KLF4 (interacts with) GFPT2	false
122297	interacts with	KLF4 (interacts with) LIPA	false
122298	interacts with	KLF4 (interacts with) HS6ST1	false
122299	interacts with	KLF4 (interacts with) GALNT12	false
122300	interacts with	KLF4 (interacts with) TPST1	false
122301	interacts with	LIN9 (interacts with) ALG10B	false
122302	interacts with	LIN9 (interacts with) RTF1	false
122303	interacts with	LIN9 (interacts with) HAS3	false
122304	interacts with	LIN9 (interacts with) GNE	false
122305	interacts with	LIN9 (interacts with) PIGX	false
122306	interacts with	LMO2 (interacts with) MFNG	false
122307	interacts with	LMO2 (interacts with) ST8SIA4	false
122308	interacts with	LMO2 (interacts with) HYAL2	false
122309	interacts with	LMO2 (interacts with) FUT1	false
122310	interacts with	LMO2 (interacts with) ST3GAL5	false
122311	interacts with	LMO2 (interacts with) NPL	false
122312	interacts with	LMO2 (interacts with) GBGT1	false
122313	interacts with	LMO2 (interacts with) RENBP	false
122314	interacts with	LMO2 (interacts with) MGAT4A	false
122315	interacts with	LMO2 (interacts with) FUCA1	false
122316	interacts with	LMO2 (interacts with) MAN2B1	false
122317	interacts with	LMO2 (interacts with) SGSH	false
122318	interacts with	LMO2 (interacts with) CHST13	false
122319	interacts with	LMO2 (interacts with) HAS1	false
122320	interacts with	LYL1 (interacts with) MFNG	false
122321	interacts with	LYL1 (interacts with) FUT7	false
122322	interacts with	LYL1 (interacts with) MAN2B1	false
122323	interacts with	LYL1 (interacts with) MGAT1	false
122324	interacts with	LYL1 (interacts with) RENBP	false
122325	interacts with	LYL1 (interacts with) HK3	false
122326	interacts with	LYL1 (interacts with) ST6GALNAC6	false
122327	interacts with	LYL1 (interacts with) ST6GALNAC4	false
122328	interacts with	LYL1 (interacts with) CHST13	false
122329	interacts with	LYL1 (interacts with) FUCA1	false
122330	interacts with	LYL1 (interacts with) NAGLU	false
122331	interacts with	LYL1 (interacts with) B3GNT8	false
122332	interacts with	LYL1 (interacts with) DPM2	false
122333	interacts with	LYL1 (interacts with) HEXA	false
122334	interacts with	LYL1 (interacts with) CTSA	false
122335	interacts with	LYL1 (interacts with) SGSH	false
122336	interacts with	MAF (interacts with) LIPA	false
122337	interacts with	MAF (interacts with) HS6ST1	false
122338	interacts with	MAFB (interacts with) NPL	false
122339	interacts with	MAFF (interacts with) PMM1	false
122340	interacts with	MAX (interacts with) ST6GAL1	false
122341	interacts with	MBD2 (interacts with) NPL	false
122342	interacts with	MBD2 (interacts with) GBA	false
122343	interacts with	MBD2 (interacts with) C1GALT1	false
122344	interacts with	MBD3 (interacts with) DPM2	false
122345	interacts with	MBD3 (interacts with) GALK1	false
122346	interacts with	MECP2 (interacts with) IDS	false
122347	interacts with	MECP2 (interacts with) MAN2A2	false
122348	interacts with	MECP2 (interacts with) NEU3	false
122349	interacts with	MECP2 (interacts with) RTF1	false
122350	interacts with	MECP2 (interacts with) FAM20B	false
122351	interacts with	MECP2 (interacts with) ALG13	false
122352	interacts with	MECP2 (interacts with) KHK	false
122353	interacts with	MED12 (interacts with) NEU3	false
122354	interacts with	MED12 (interacts with) RTF1	false
122355	interacts with	MED12 (interacts with) ACER2	false
122356	interacts with	MED12 (interacts with) PIGM	false
122357	interacts with	MED12 (interacts with) GNE	false
122358	interacts with	MED12 (interacts with) SULT1C4	false
122359	interacts with	MEF2A (interacts with) MGAT5	false
122360	interacts with	MEF2A (interacts with) RTF1	false
122361	interacts with	MEF2A (interacts with) OGT	false
122362	interacts with	MEF2A (interacts with) FAM20B	false
122363	interacts with	MEF2A (interacts with) B3GALNT2	false
122364	interacts with	MEF2A (interacts with) SLC35A1	false
122365	interacts with	MEF2B (interacts with) SULT1A3	false
122366	interacts with	MEF2C (interacts with) ST6GAL1	false
122367	interacts with	MEF2D (interacts with) KHK	false
122368	interacts with	MEIS1 (interacts with) B4GALNT4	false
122369	interacts with	MRE11A (interacts with) NEU3	false
122370	interacts with	MXI1 (interacts with) FAM20B	false
122371	interacts with	MXI1 (interacts with) RTF1	false
122372	interacts with	MXI1 (interacts with) SLC35A1	false
122373	interacts with	MXI1 (interacts with) KHK	false
122374	interacts with	MYC (interacts with) UGDH	false
122375	interacts with	MYC (interacts with) GNPNAT1	false
122376	interacts with	MYC (interacts with) B4GALT3	false
122377	interacts with	MYC (interacts with) UAP1	false
122378	interacts with	MYC (interacts with) HAS2	false
122379	interacts with	MYH11 (interacts with) B3GALNT2	false
122380	interacts with	MYH11 (interacts with) KHK	false
122381	interacts with	MYH11 (interacts with) FAM20B	false
122382	interacts with	MYH11 (interacts with) RTF1	false
122383	interacts with	NCOR2 (interacts with) PIGO	false
122384	interacts with	NCOR2 (interacts with) SLC35B4	false
122385	interacts with	NFIC (interacts with) MGAT5	false
122386	interacts with	NFIC (interacts with) SLC35A3	false
122387	interacts with	NFIC (interacts with) FKTN	false
122388	interacts with	NFIC (interacts with) RTF1	false
122389	interacts with	NFIC (interacts with) GNE	false
122390	interacts with	NFIC (interacts with) MAN2A2	false
122391	interacts with	NFYC (interacts with) ST3GAL3	false
122392	interacts with	NIPBL (interacts with) NEU3	false
122393	interacts with	NIPBL (interacts with) RTF1	false
122394	interacts with	NIPBL (interacts with) ACER2	false
122395	interacts with	NIPBL (interacts with) MAN2A2	false
122396	interacts with	NPAT (interacts with) RTF1	false
122397	interacts with	NR1H2 (interacts with) B3GALT4	false
122398	interacts with	NR1H3 (interacts with) NAAA	false
122399	interacts with	NR2C2 (interacts with) STT3B	false
122400	interacts with	NR2C2 (interacts with) FKTN	false
122401	interacts with	NR2C2 (interacts with) OGT	false
122402	interacts with	NR2C2 (interacts with) ALG10B	false
122403	interacts with	NR2C2 (interacts with) FAM20B	false
122404	interacts with	NR2C2 (interacts with) SLC35A3	false
122405	interacts with	NR2C2 (interacts with) SLC35D1	false
122406	interacts with	NR2C2 (interacts with) B3GALNT2	false
122407	interacts with	NR2C2 (interacts with) GNE	false
122408	interacts with	NR2F2 (interacts with) SULT1C4	false
122409	interacts with	NR2F2 (interacts with) RTF1	false
122410	interacts with	NR2F2 (interacts with) MAN2A2	false
122411	interacts with	NR2F2 (interacts with) MAN1C1	false
122412	interacts with	NR2F2 (interacts with) FAM20B	false
122413	interacts with	NR2F2 (interacts with) SLC35A1	false
122414	interacts with	NRF1 (interacts with) OGT	false
122415	interacts with	NRF1 (interacts with) PIGO	false
122416	interacts with	PBX1 (interacts with) SLC35A1	false
122417	interacts with	PBX1 (interacts with) B3GALNT2	false
122418	interacts with	PBX1 (interacts with) ST3GAL1	false
122419	interacts with	PBX1 (interacts with) KHK	false
122420	interacts with	PCGF1 (interacts with) PIGF	false
122421	interacts with	PHF20 (interacts with) SLC35A3	false
122422	interacts with	PHF20 (interacts with) RTF1	false
122423	interacts with	PHF20 (interacts with) GNE	false
122424	interacts with	PIAS1 (interacts with) MGAT5	false
122425	interacts with	PIAS1 (interacts with) ACER2	false
122426	interacts with	PIAS1 (interacts with) UGCG	false
122427	interacts with	PIAS1 (interacts with) ALG10	false
122428	interacts with	PIAS1 (interacts with) SLC35A3	false
122429	interacts with	PIAS1 (interacts with) FKTN	false
122430	interacts with	PIAS1 (interacts with) GNE	false
122431	interacts with	PIAS1 (interacts with) RTF1	false
122432	interacts with	PIAS1 (interacts with) OGT	false
122433	interacts with	PIAS1 (interacts with) COG1	false
122434	interacts with	POLR2B (interacts with) MAN1A2	false
122435	interacts with	POLR2B (interacts with) STT3B	false
122436	interacts with	POLR2B (interacts with) MAN2A1	false
122437	interacts with	POLR2B (interacts with) RTF1	false
122438	interacts with	POLR2B (interacts with) SLC35D1	false
122439	interacts with	POLR2B (interacts with) GNE	false
122440	interacts with	POLR2B (interacts with) NEU3	false
122441	interacts with	PPARG (interacts with) CHST7	false
122442	interacts with	PPARG (interacts with) PAPSS2	false
122443	interacts with	PRDM1 (interacts with) MGAT4A	false
122444	interacts with	PRDM4 (interacts with) SLC35B3	false
122445	interacts with	PRDM4 (interacts with) EXT2	false
122446	interacts with	RBPJ (interacts with) GALK1	false
122447	interacts with	RBPJ (interacts with) NANS	false
122448	interacts with	RCOR1 (interacts with) SLC35A3	false
122449	interacts with	RCOR1 (interacts with) FKTN	false
122450	interacts with	RCOR1 (interacts with) NEU3	false
122451	interacts with	RCOR1 (interacts with) MAN1A2	false
122452	interacts with	RCOR1 (interacts with) ACER2	false
122453	interacts with	RCOR1 (interacts with) GNE	false
122454	interacts with	RCOR1 (interacts with) OGT	false
122455	interacts with	RFX5 (interacts with) NEU3	false
122456	interacts with	RFX5 (interacts with) B3GALNT2	false
122457	interacts with	RFX5 (interacts with) KHK	false
122458	interacts with	RFX7 (interacts with) NEU3	false
122459	interacts with	RLF (interacts with) RTF1	false
122460	interacts with	RNF2 (interacts with) SLC35F5	false
122461	interacts with	RNF2 (interacts with) GALNT1	false
122462	interacts with	RNF2 (interacts with) FUT11	false
122463	interacts with	RNF2 (interacts with) CHSY1	false
122464	interacts with	RNF2 (interacts with) PAPSS1	false
122465	interacts with	RNF2 (interacts with) COG6	false
122466	interacts with	RNF2 (interacts with) GFPT1	false
122467	interacts with	RNF2 (interacts with) B3GALNT1	false
122468	interacts with	RNF2 (interacts with) GALC	false
122469	interacts with	RNF2 (interacts with) B4GALT3	false
122470	interacts with	RNF2 (interacts with) EXTL2	false
122471	interacts with	RNF2 (interacts with) SLC35B4	false
122472	interacts with	RNF2 (interacts with) EXT2	false
122473	interacts with	RNF2 (interacts with) UXS1	false
122474	interacts with	RUNX1 (interacts with) CHST15	false
122475	interacts with	RUNX1 (interacts with) CHSY1	false
122476	interacts with	RUNX1 (interacts with) GALNT10	false
122477	interacts with	RUNX1 (interacts with) TPST2	false
122478	interacts with	RUNX1 (interacts with) GALNS	false
122479	interacts with	RUNX1 (interacts with) NPL	false
122480	interacts with	RUNX1 (interacts with) GALC	false
122481	interacts with	RUNX1 (interacts with) PMM2	false
122482	interacts with	RUNX1 (interacts with) SLC35C1	false
122483	interacts with	RUNX1 (interacts with) UGDH	false
122484	interacts with	RUNX1 (interacts with) MAN1B1	false
122485	interacts with	RUNX1 (interacts with) UAP1	false
122486	interacts with	RUNX2 (interacts with) GALNT10	false
122487	interacts with	RUNX2 (interacts with) TPST2	false
122488	interacts with	SATB1 (interacts with) FUT11	false
122489	interacts with	SCML2 (interacts with) OGT	false
122490	interacts with	SCML2 (interacts with) FAM20B	false
122491	interacts with	SCML2 (interacts with) SLC35A3	false
122492	interacts with	SCML2 (interacts with) MAN1A2	false
122493	interacts with	SETDB1 (interacts with) OGT	false
122494	interacts with	SETDB1 (interacts with) FKTN	false
122495	interacts with	SETDB1 (interacts with) PIGO	false
122496	interacts with	SETDB1 (interacts with) ALG10B	false
122497	interacts with	SETDB1 (interacts with) RTF1	false
122498	interacts with	SIN3A (interacts with) RTF1	false
122499	interacts with	SIN3A (interacts with) NEU3	false
122500	interacts with	SIN3A (interacts with) B3GALNT2	false
122501	interacts with	SIRT6 (interacts with) DPM2	false
122502	interacts with	SIRT6 (interacts with) B3GAT3	false
122503	interacts with	SIRT6 (interacts with) DPM3	false
122504	interacts with	SIRT6 (interacts with) GALK1	false
122505	interacts with	SIRT6 (interacts with) ALG3	false
122506	interacts with	SIRT6 (interacts with) NANS	false
122507	interacts with	SIRT6 (interacts with) DAD1	false
122508	interacts with	SMAD1 (interacts with) CHSY1	false
122509	interacts with	SMAD1 (interacts with) FUT11	false
122510	interacts with	SMAD1 (interacts with) NDST1	false
122511	interacts with	SMAD1 (interacts with) B3GNT5	false
122512	interacts with	SMAD1 (interacts with) ST3GAL2	false
122513	interacts with	SMAD4 (interacts with) RTF1	false
122514	interacts with	SMAD4 (interacts with) STT3B	false
122515	interacts with	SMAD4 (interacts with) B3GALNT2	false
122516	interacts with	SMAD4 (interacts with) SLC35A1	false
122517	interacts with	SMARCA4 (interacts with) SLC35E1	false
122518	interacts with	SMARCC1 (interacts with) FKTN	false
122519	interacts with	SMARCC1 (interacts with) RTF1	false
122520	interacts with	SMARCC1 (interacts with) SLC35A3	false
122521	interacts with	SMARCC1 (interacts with) B3GALNT2	false
122522	interacts with	SMARCC1 (interacts with) OGT	false
122523	interacts with	SMC1A (interacts with) NEU3	false
122524	interacts with	SMC1A (interacts with) STT3B	false
122525	interacts with	SMC1A (interacts with) MAN1A2	false
122526	interacts with	SMC1A (interacts with) RTF1	false
122527	interacts with	SMC1A (interacts with) ACER2	false
122528	interacts with	SMC1A (interacts with) SLC35D1	false
122529	interacts with	SMC1A (interacts with) PIGW	false
122530	interacts with	SMC1A (interacts with) FKTN	false
122531	interacts with	SMC1A (interacts with) PIGX	false
122532	interacts with	SMC1A (interacts with) MAN2A2	false
122533	interacts with	SMC3 (interacts with) STT3B	false
122534	interacts with	SMC3 (interacts with) FUT11	false
122535	interacts with	SMC3 (interacts with) RTF1	false
122536	interacts with	SMC3 (interacts with) SLC35A3	false
122537	interacts with	SMC3 (interacts with) MAN2A1	false
122538	interacts with	SMC3 (interacts with) NEU3	false
122539	interacts with	SMC3 (interacts with) FKTN	false
122540	interacts with	SMC3 (interacts with) MAN1A2	false
122541	interacts with	SMC3 (interacts with) UGCG	false
122542	interacts with	SMC3 (interacts with) GNE	false
122543	interacts with	SMC3 (interacts with) ALG10B	false
122544	interacts with	SMC3 (interacts with) OGT	false
122545	interacts with	SMC3 (interacts with) FPGT	false
122546	interacts with	SOX11 (interacts with) GALNT14	false
122547	interacts with	SP2 (interacts with) MAN1A2	false
122548	interacts with	SP2 (interacts with) SLC35A5	false
122549	interacts with	SP2 (interacts with) MAN2A2	false
122550	interacts with	SP2 (interacts with) GLCE	false
122551	interacts with	SRC (interacts with) KHK	false
122552	interacts with	SRC (interacts with) PIGX	false
122553	interacts with	SRC (interacts with) RTF1	false
122554	interacts with	SRC (interacts with) ST3GAL1	false
122555	interacts with	SRF (interacts with) KHK	false
122556	interacts with	SRF (interacts with) HAS3	false
122557	interacts with	SRF (interacts with) PIGX	false
122558	interacts with	SRF (interacts with) RTF1	false
122559	interacts with	SSRP1 (interacts with) GANAB	false
122560	interacts with	STAT1 (interacts with) LAMP3	false
122561	interacts with	STAT1 (interacts with) UGCG	false
122562	interacts with	STAT1 (interacts with) ST6GAL1	false
122563	interacts with	STAT3 (interacts with) MGAT5	false
122564	interacts with	STAT3 (interacts with) UGCG	false
122565	interacts with	STAT3 (interacts with) MAN1A2	false
122566	interacts with	STAT3 (interacts with) ACER2	false
122567	interacts with	STAT3 (interacts with) ST6GAL1	false
122568	interacts with	STAT4 (interacts with) FUT7	false
122569	interacts with	STAT4 (interacts with) ST8SIA4	false
122570	interacts with	STAT4 (interacts with) MFNG	false
122571	interacts with	STAT4 (interacts with) GBGT1	false
122572	interacts with	STAT4 (interacts with) FUCA1	false
122573	interacts with	STAT4 (interacts with) MGAT4A	false
122574	interacts with	STAT4 (interacts with) GM2A	false
122575	interacts with	STAT4 (interacts with) MAN2B1	false
122576	interacts with	STAT4 (interacts with) NPL	false
122577	interacts with	STAT4 (interacts with) NAAA	false
122578	interacts with	STAT4 (interacts with) MGAT1	false
122579	interacts with	STAT4 (interacts with) RENBP	false
122580	interacts with	STAT4 (interacts with) NDST2	false
122581	interacts with	STAT4 (interacts with) ST3GAL5	false
122582	interacts with	STAT4 (interacts with) NAGK	false
122583	interacts with	STAT4 (interacts with) GALNT6	false
122584	interacts with	STAT4 (interacts with) HAS1	false
122585	interacts with	STAT5A (interacts with) MFNG	false
122586	interacts with	STAT5A (interacts with) RENBP	false
122587	interacts with	STAT5A (interacts with) B3GALT4	false
122588	interacts with	STAT5A (interacts with) FUCA1	false
122589	interacts with	STAT5A (interacts with) ST6GAL1	false
122590	interacts with	STAT5A (interacts with) FUT7	false
122591	interacts with	STAT5B (interacts with) MAN2A2	false
122592	interacts with	STAT5B (interacts with) ST6GAL1	false
122593	interacts with	STAT5B (interacts with) FAM20B	false
122594	interacts with	STAT5B (interacts with) KHK	false
122595	interacts with	STAT5B (interacts with) RTF1	false
122596	interacts with	STAT6 (interacts with) KHK	false
122597	interacts with	STAT6 (interacts with) ST6GAL1	false
122598	interacts with	STAT6 (interacts with) SLC35A1	false
122599	interacts with	SVIL (interacts with) RTF1	false
122600	interacts with	SVIL (interacts with) HAS3	false
122601	interacts with	TAF1 (interacts with) NEU3	false
122602	interacts with	TAF1 (interacts with) MAN1A2	false
122603	interacts with	TAF1 (interacts with) OGT	false
122604	interacts with	TAF1 (interacts with) RTF1	false
122605	interacts with	TAF1 (interacts with) ACER2	false
122606	interacts with	TBP (interacts with) SLC35A1	false
122607	interacts with	TCF12 (interacts with) FUT11	false
122608	interacts with	TCF12 (interacts with) RTF1	false
122609	interacts with	TCF12 (interacts with) GLCE	false
122610	interacts with	TCF12 (interacts with) STT3B	false
122611	interacts with	TCF12 (interacts with) NEU3	false
122612	interacts with	TCF12 (interacts with) COG3	false
122613	interacts with	TCF12 (interacts with) FUT10	false
122614	interacts with	TCF7L2 (interacts with) FAM20B	false
122615	interacts with	TCF7L2 (interacts with) RTF1	false
122616	interacts with	TEAD1 (interacts with) UGCG	false
122617	interacts with	TEAD1 (interacts with) SLC35A3	false
122618	interacts with	TEAD1 (interacts with) FAM20B	false
122619	interacts with	TEAD1 (interacts with) SLC35D1	false
122620	interacts with	TEAD1 (interacts with) GNE	false
122621	interacts with	TERF2 (interacts with) COG8	false
122622	interacts with	TERF2 (interacts with) COG4	false
122623	interacts with	THAP1 (interacts with) SLC35A1	false
122624	interacts with	THAP1 (interacts with) B3GALNT2	false
122625	interacts with	THAP11 (interacts with) COG8	false
122626	interacts with	THAP11 (interacts with) COG4	false
122627	interacts with	TRRAP (interacts with) RTF1	false
122628	interacts with	TTF2 (interacts with) MAN1A2	false
122629	interacts with	TTF2 (interacts with) NEU3	false
122630	interacts with	TTF2 (interacts with) PIGW	false
122631	interacts with	TTF2 (interacts with) RTF1	false
122632	interacts with	TTF2 (interacts with) FPGT	false
122633	interacts with	TTF2 (interacts with) UGCG	false
122634	interacts with	UBE2I (interacts with) SLC35B1	false
122635	interacts with	USF1 (interacts with) DPM3	false
122636	interacts with	USF2 (interacts with) GPI	false
122637	interacts with	VEZF1 (interacts with) ALG10B	false
122638	interacts with	VEZF1 (interacts with) ALG10	false
122639	interacts with	VEZF1 (interacts with) FKTN	false
122640	interacts with	VEZF1 (interacts with) GNE	false
122641	interacts with	VEZF1 (interacts with) ALG13	false
122642	interacts with	VEZF1 (interacts with) SLC35A1	false
122643	interacts with	WDR5 (interacts with) MAN1B1	false
122644	interacts with	XRN2 (interacts with) STT3B	false
122645	interacts with	XRN2 (interacts with) MAN1A2	false
122646	interacts with	XRN2 (interacts with) NEU3	false
122647	interacts with	XRN2 (interacts with) ALG10	false
122648	interacts with	XRN2 (interacts with) RTF1	false
122649	interacts with	XRN2 (interacts with) OGT	false
122650	interacts with	YAP1 (interacts with) STT3B	false
122651	interacts with	YAP1 (interacts with) ALG9	false
122652	interacts with	YAP1 (interacts with) SLC35D1	false
122653	interacts with	YAP1 (interacts with) B3GALNT2	false
122654	interacts with	YAP1 (interacts with) SULT1C4	false
122655	interacts with	YY1 (interacts with) STT3B	false
122656	interacts with	YY1 (interacts with) SLC35A3	false
122657	interacts with	YY1 (interacts with) PIGW	false
122658	interacts with	YY1 (interacts with) FKTN	false
122659	interacts with	YY1 (interacts with) MAN1A2	false
122660	interacts with	YY1 (interacts with) RTF1	false
122661	interacts with	YY1 (interacts with) ALG10	false
122662	interacts with	YY1 (interacts with) OGT	false
122663	interacts with	ZBTB17 (interacts with) DPM3	false
122664	interacts with	ZBTB17 (interacts with) DPM2	false
122665	interacts with	ZBTB17 (interacts with) GALE	false
122666	interacts with	ZBTB2 (interacts with) GALNT4	false
