# Supplementary material for: A systems-based framework to computationally describe putative transcription factors and signaling pathways regulating glycan biosynthesis
Source: publisher site journal article supplement (doi:10.3762/bjoc.17.119), 2021-07-22
Supplement: Additional file 2 [file 1860-5397-17-119-S2.cys › CytoscapeSession-2021_03_21-12_01/tables/122667-SKCM/LOCAL_ATTRS-org.cytoscape.model.CyEdge-SKCM+default+edge.cytable]

CyCSV-Version	1
SUID	interaction	name	selected
java.lang.Long	java.lang.String	java.lang.String	java.lang.Boolean
SKCM default edge
122679	interacts with	ADNP (interacts with) FUT7	false
122680	interacts with	AFF4 (interacts with) MAN1A2	false
122681	interacts with	AFF4 (interacts with) STT3B	false
122682	interacts with	AFF4 (interacts with) NEU3	false
122683	interacts with	AFF4 (interacts with) FUT11	false
122684	interacts with	AFF4 (interacts with) MAN2A1	false
122685	interacts with	AFF4 (interacts with) UGCG	false
122686	interacts with	ATF2 (interacts with) MAN1A2	false
122687	interacts with	ATF2 (interacts with) MAN2A1	false
122688	interacts with	ATF2 (interacts with) FUT11	false
122689	interacts with	ATF2 (interacts with) SLC35F5	false
122690	interacts with	ATF2 (interacts with) ACER2	false
122691	interacts with	ATF2 (interacts with) UGGT1	false
122692	interacts with	ATF2 (interacts with) SLC35A3	false
122693	interacts with	ATF2 (interacts with) COG6	false
122694	interacts with	ATF2 (interacts with) COG3	false
122695	interacts with	ATF2 (interacts with) EXTL2	false
122696	interacts with	ATF2 (interacts with) GALNT4	false
122697	interacts with	ATF7IP (interacts with) ALG10	false
122698	interacts with	ATF7IP (interacts with) ALG10B	false
122699	interacts with	ATRX (interacts with) SLC35A3	false
122700	interacts with	ATRX (interacts with) COG3	false
122701	interacts with	BATF (interacts with) FUT7	false
122702	interacts with	BATF (interacts with) NAGK	false
122703	interacts with	BATF (interacts with) FUCA1	false
122704	interacts with	BATF (interacts with) LAMP3	false
122705	interacts with	BATF (interacts with) GM2A	false
122706	interacts with	BATF (interacts with) CHST12	false
122707	interacts with	BATF3 (interacts with) HK3	false
122708	interacts with	BATF3 (interacts with) ST8SIA4	false
122709	interacts with	BCAT1 (interacts with) GCNT1	false
122710	interacts with	BMI1 (interacts with) ALG10B	false
122711	interacts with	BRCA1 (interacts with) ALG10	false
122712	interacts with	BRD1 (interacts with) ALG12	false
122713	interacts with	BRD4 (interacts with) SLC35E1	false
122714	interacts with	BTAF1 (interacts with) ALG10	false
122715	interacts with	CASP8AP2 (interacts with) ALG10B	false
122716	interacts with	CBX8 (interacts with) GALK1	false
122717	interacts with	CDK12 (interacts with) ACER2	false
122718	interacts with	CDK8 (interacts with) STT3B	false
122719	interacts with	CDK8 (interacts with) NEU3	false
122720	interacts with	CDK8 (interacts with) COG3	false
122721	interacts with	CDK9 (interacts with) DPM2	false
122722	interacts with	CDK9 (interacts with) MAN1B1	false
122723	interacts with	CDK9 (interacts with) ST6GALNAC6	false
122724	interacts with	CDK9 (interacts with) POMT1	false
122725	interacts with	CHD1 (interacts with) CSGALNACT2	false
122726	interacts with	CHD1 (interacts with) MAN1A2	false
122727	interacts with	CHD2 (interacts with) OGT	false
122728	interacts with	CHD2 (interacts with) COG3	false
122729	interacts with	CHD2 (interacts with) ALG10B	false
122730	interacts with	CHD8 (interacts with) NEU3	false
122731	interacts with	CHD8 (interacts with) MGAT2	false
122732	interacts with	CHD8 (interacts with) POMT2	false
122733	interacts with	CIITA (interacts with) FUT7	false
122734	interacts with	CIITA (interacts with) LAMP3	false
122735	interacts with	CIITA (interacts with) MAN1A1	false
122736	interacts with	CLOCK (interacts with) FUT11	false
122737	interacts with	CLOCK (interacts with) FAM20B	false
122738	interacts with	CPSF3L (interacts with) RFNG	false
122739	interacts with	CREB3L4 (interacts with) B4GALT3	false
122740	interacts with	CREBBP (interacts with) NEU3	false
122741	interacts with	CTNNB1 (interacts with) STT3B	false
122742	interacts with	CTNNB1 (interacts with) UGCG	false
122743	interacts with	CTNNB1 (interacts with) NEU3	false
122744	interacts with	CTNNB1 (interacts with) ASAH1	false
122745	interacts with	CTNNB1 (interacts with) GLB1	false
122746	interacts with	DCP1A (interacts with) STT3B	false
122747	interacts with	DEK (interacts with) ALG10	false
122748	interacts with	DEK (interacts with) ALG10B	false
122749	interacts with	DEK (interacts with) SLC35B3	false
122750	interacts with	DEK (interacts with) OGT	false
122751	interacts with	DICER1 (interacts with) MGAT2	false
122752	interacts with	E2F4 (interacts with) COG4	false
122753	interacts with	E2F4 (interacts with) COG8	false
122754	interacts with	E2F4 (interacts with) ST3GAL2	false
122755	interacts with	EBF1 (interacts with) PAPSS2	false
122756	interacts with	EBF1 (interacts with) SULF2	false
122757	interacts with	EBF1 (interacts with) CHST1	false
122758	interacts with	EBF1 (interacts with) SULF1	false
122759	interacts with	EBF1 (interacts with) A4GALT	false
122760	interacts with	EBF1 (interacts with) HS3ST3A1	false
122761	interacts with	EBF1 (interacts with) HS3ST3B1	false
122762	interacts with	EGR2 (interacts with) MFNG	false
122763	interacts with	EGR2 (interacts with) CHST15	false
122764	interacts with	EGR2 (interacts with) ST6GALNAC6	false
122765	interacts with	ELF1 (interacts with) COG3	false
122766	interacts with	ELF1 (interacts with) COG6	false
122767	interacts with	ELF1 (interacts with) SLC35B3	false
122768	interacts with	ELF1 (interacts with) ALG5	false
122769	interacts with	ELF1 (interacts with) OGT	false
122770	interacts with	ELK4 (interacts with) ALG10	false
122771	interacts with	ELK4 (interacts with) FUT11	false
122772	interacts with	ELK4 (interacts with) FAM20B	false
122773	interacts with	ELK4 (interacts with) ACER2	false
122774	interacts with	ELK4 (interacts with) SLC35E1	false
122775	interacts with	ESRRA (interacts with) B3GAT3	false
122776	interacts with	ESRRA (interacts with) ALG8	false
122777	interacts with	ETS1 (interacts with) UGCG	false
122778	interacts with	EZH1 (interacts with) OGT	false
122779	interacts with	EZH1 (interacts with) FPGT	false
122780	interacts with	FLI1 (interacts with) ST8SIA4	false
122781	interacts with	FLI1 (interacts with) MGAT4A	false
122782	interacts with	FLI1 (interacts with) FUT7	false
122783	interacts with	FLI1 (interacts with) MAN1C1	false
122784	interacts with	FLI1 (interacts with) FUCA1	false
122785	interacts with	FLI1 (interacts with) CHST15	false
122786	interacts with	FLI1 (interacts with) HK3	false
122787	interacts with	FLI1 (interacts with) LAMP3	false
122788	interacts with	FLI1 (interacts with) ST6GALNAC6	false
122789	interacts with	FLI1 (interacts with) GBGT1	false
122790	interacts with	FLI1 (interacts with) GCNT1	false
122791	interacts with	FLI1 (interacts with) ST6GALNAC4	false
122792	interacts with	FLI1 (interacts with) LFNG	false
122793	interacts with	FLI1 (interacts with) CHST4	false
122794	interacts with	FOXO1 (interacts with) ST6GAL1	false
122795	interacts with	FOXP3 (interacts with) FUT7	false
122796	interacts with	FOXP3 (interacts with) ST8SIA4	false
122797	interacts with	FOXP3 (interacts with) HK3	false
122798	interacts with	FOXP3 (interacts with) MFNG	false
122799	interacts with	FOXP3 (interacts with) GBGT1	false
122800	interacts with	FOXP3 (interacts with) FUCA1	false
122801	interacts with	FOXP3 (interacts with) LFNG	false
122802	interacts with	GABPA (interacts with) ALG10B	false
122803	interacts with	GABPA (interacts with) FPGT	false
122804	interacts with	GABPA (interacts with) COG3	false
122805	interacts with	GABPA (interacts with) SLC35A3	false
122806	interacts with	GABPA (interacts with) COG6	false
122807	interacts with	GPS2 (interacts with) GALK1	false
122808	interacts with	GREB1 (interacts with) GALNT3	false
122809	interacts with	GTF2B (interacts with) ALG14	false
122810	interacts with	GTF2I (interacts with) COG5	false
122811	interacts with	H2AFX (interacts with) DPAGT1	false
122812	interacts with	HCFC1 (interacts with) NEU3	false
122813	interacts with	HSF1 (interacts with) TSTA3	false
122814	interacts with	HSF1 (interacts with) GPAA1	false
122815	interacts with	IKZF1 (interacts with) MFNG	false
122816	interacts with	IKZF1 (interacts with) ST8SIA4	false
122817	interacts with	IKZF1 (interacts with) LAMP3	false
122818	interacts with	IKZF1 (interacts with) MGAT4A	false
122819	interacts with	IKZF1 (interacts with) FUT7	false
122820	interacts with	IKZF1 (interacts with) FUCA1	false
122821	interacts with	IKZF1 (interacts with) NDST2	false
122822	interacts with	IKZF1 (interacts with) LIPA	false
122823	interacts with	IKZF1 (interacts with) DSE	false
122824	interacts with	IKZF1 (interacts with) NAGK	false
122825	interacts with	IKZF1 (interacts with) GCNT1	false
122826	interacts with	IKZF1 (interacts with) NAAA	false
122827	interacts with	INO80 (interacts with) RTF1	false
122828	interacts with	IRF1 (interacts with) HK3	false
122829	interacts with	IRF1 (interacts with) LAMP3	false
122830	interacts with	IRF1 (interacts with) ST8SIA4	false
122831	interacts with	IRF1 (interacts with) NAGK	false
122832	interacts with	IRF1 (interacts with) GCNT1	false
122833	interacts with	IRF1 (interacts with) MGAT4A	false
122834	interacts with	IRF2 (interacts with) LAMP3	false
122835	interacts with	IRF2 (interacts with) ST8SIA4	false
122836	interacts with	IRF2 (interacts with) GCNT1	false
122837	interacts with	IRF3 (interacts with) FUT7	false
122838	interacts with	IRF4 (interacts with) PIGY	false
122839	interacts with	IRF4 (interacts with) ST8SIA6	false
122840	interacts with	IRF4 (interacts with) GCNT2	false
122841	interacts with	IRF4 (interacts with) PIGB	false
122842	interacts with	IRF4 (interacts with) GALNT3	false
122843	interacts with	IRF5 (interacts with) HK3	false
122844	interacts with	IRF5 (interacts with) FUT7	false
122845	interacts with	IRF5 (interacts with) MFNG	false
122846	interacts with	IRF5 (interacts with) GBGT1	false
122847	interacts with	IRF5 (interacts with) NAAA	false
122848	interacts with	IRF5 (interacts with) LFNG	false
122849	interacts with	IRF5 (interacts with) LAMP3	false
122850	interacts with	IRF5 (interacts with) CHST15	false
122851	interacts with	IRF5 (interacts with) ST6GALNAC4	false
122852	interacts with	IRF8 (interacts with) HK3	false
122853	interacts with	IRF8 (interacts with) ST8SIA4	false
122854	interacts with	IRF8 (interacts with) LIPA	false
122855	interacts with	IRF8 (interacts with) MGAT4A	false
122856	interacts with	IRF8 (interacts with) FUCA1	false
122857	interacts with	IRF8 (interacts with) NAAA	false
122858	interacts with	IRF8 (interacts with) DSE	false
122859	interacts with	IRF8 (interacts with) GCNT1	false
122860	interacts with	JARID2 (interacts with) NEU3	false
122861	interacts with	JMJD6 (interacts with) COG1	false
122862	interacts with	KAT2B (interacts with) ST3GAL5	false
122863	interacts with	KAT5 (interacts with) B3GAT3	false
122864	interacts with	KDM4A (interacts with) GNB1	false
122865	interacts with	KDM5A (interacts with) ALG10	false
122866	interacts with	KDM5A (interacts with) NEU3	false
122867	interacts with	KDM5A (interacts with) ALG10B	false
122868	interacts with	KDM5A (interacts with) SLC35A3	false
122869	interacts with	KDM5A (interacts with) FUT11	false
122870	interacts with	KDM5A (interacts with) COG3	false
122871	interacts with	KDM5B (interacts with) NEU3	false
122872	interacts with	LIN9 (interacts with) ALG10B	false
122873	interacts with	LYL1 (interacts with) MFNG	false
122874	interacts with	LYL1 (interacts with) FUT7	false
122875	interacts with	LYL1 (interacts with) MAN2B1	false
122876	interacts with	LYL1 (interacts with) HK3	false
122877	interacts with	LYL1 (interacts with) CHST12	false
122878	interacts with	LYL1 (interacts with) ST6GALNAC6	false
122879	interacts with	LYL1 (interacts with) ST6GALNAC4	false
122880	interacts with	LYL1 (interacts with) LFNG	false
122881	interacts with	LYL1 (interacts with) CHST15	false
122882	interacts with	MAFB (interacts with) DSE	false
122883	interacts with	MAZ (interacts with) B4GALT2	false
122884	interacts with	MED1 (interacts with) FUT11	false
122885	interacts with	MEF2B (interacts with) CHST4	false
122886	interacts with	MEF2D (interacts with) B4GALT3	false
122887	interacts with	MITF (interacts with) ASAH1	false
122888	interacts with	MITF (interacts with) UGCG	false
122889	interacts with	MITF (interacts with) GNPDA1	false
122890	interacts with	MITF (interacts with) GCNT2	false
122891	interacts with	MITF (interacts with) PIGY	false
122892	interacts with	MITF (interacts with) NEU3	false
122893	interacts with	MXI1 (interacts with) PIGY	false
122894	interacts with	NFIC (interacts with) FUT11	false
122895	interacts with	NFIC (interacts with) SLC35E1	false
122896	interacts with	NFYA (interacts with) PIGN	false
122897	interacts with	NFYC (interacts with) GALE	false
122898	interacts with	NIPBL (interacts with) SLC35A5	false
122899	interacts with	NPAT (interacts with) SLC35A3	false
122900	interacts with	NR1H3 (interacts with) NAAA	false
122901	interacts with	NR2C2 (interacts with) STT3B	false
122902	interacts with	NR2C2 (interacts with) OGT	false
122903	interacts with	NR2C2 (interacts with) ALG10B	false
122904	interacts with	NR2C2 (interacts with) FUT11	false
122905	interacts with	NR2C2 (interacts with) FAM20B	false
122906	interacts with	PHF8 (interacts with) NEU3	false
122907	interacts with	PIAS1 (interacts with) ACER2	false
122908	interacts with	PML (interacts with) GM2A	false
122909	interacts with	PML (interacts with) NAGK	false
122910	interacts with	POLR2B (interacts with) MAN1A2	false
122911	interacts with	POLR2B (interacts with) HS2ST1	false
122912	interacts with	POLR2B (interacts with) EXTL2	false
122913	interacts with	POLR3A (interacts with) MGAT5	false
122914	interacts with	POLR3A (interacts with) NEU3	false
122915	interacts with	POLR3A (interacts with) ACER2	false
122916	interacts with	POLR3A (interacts with) HK1	false
122917	interacts with	POLR3G (interacts with) FPGT	false
122918	interacts with	POU2F2 (interacts with) MAN1A1	false
122919	interacts with	POU2F2 (interacts with) DSE	false
122920	interacts with	PPARA (interacts with) GFPT1	false
122921	interacts with	PRDM1 (interacts with) SULF1	false
122922	interacts with	PRDM1 (interacts with) HK3	false
122923	interacts with	PRDM1 (interacts with) GBGT1	false
122924	interacts with	PRDM1 (interacts with) ST6GALNAC6	false
122925	interacts with	PRDM1 (interacts with) ST6GALNAC4	false
122926	interacts with	RB1 (interacts with) COG6	false
122927	interacts with	RB1 (interacts with) COG3	false
122928	interacts with	RB1 (interacts with) SLC35A3	false
122929	interacts with	RB1 (interacts with) UGGT2	false
122930	interacts with	RB1 (interacts with) ALG5	false
122931	interacts with	RBBP5 (interacts with) MAN1A2	false
122932	interacts with	RBBP5 (interacts with) FAM20B	false
122933	interacts with	RBBP5 (interacts with) FUT11	false
122934	interacts with	RBBP5 (interacts with) ACER2	false
122935	interacts with	RBBP5 (interacts with) SLC35E1	false
122936	interacts with	RBBP5 (interacts with) NEU3	false
122937	interacts with	RBBP5 (interacts with) STT3B	false
122938	interacts with	RBBP5 (interacts with) COG2	false
122939	interacts with	RBL2 (interacts with) ALG10B	false
122940	interacts with	RBL2 (interacts with) SLC35A5	false
122941	interacts with	RBL2 (interacts with) SLC35A3	false
122942	interacts with	RBL2 (interacts with) FPGT	false
122943	interacts with	RBL2 (interacts with) COG6	false
122944	interacts with	RBL2 (interacts with) MAN1A2	false
122945	interacts with	RBL2 (interacts with) OGT	false
122946	interacts with	RCOR1 (interacts with) NEU3	false
122947	interacts with	RCOR1 (interacts with) GNPNAT1	false
122948	interacts with	RCOR1 (interacts with) MGAT2	false
122949	interacts with	RCOR1 (interacts with) POMT2	false
122950	interacts with	RELA (interacts with) GANAB	false
122951	interacts with	RELA (interacts with) B3GAT3	false
122952	interacts with	REST (interacts with) FUT11	false
122953	interacts with	RFX7 (interacts with) NEU3	false
122954	interacts with	RING1 (interacts with) SLC35B2	false
122955	interacts with	RNF2 (interacts with) FAM20B	false
122956	interacts with	RUNX1 (interacts with) SULF1	false
122957	interacts with	SETDB1 (interacts with) COG2	false
122958	interacts with	SFMBT1 (interacts with) STT3B	false
122959	interacts with	SMAD4 (interacts with) ALG10B	false
122960	interacts with	SMAD4 (interacts with) COG3	false
122961	interacts with	SMAD4 (interacts with) GALNT1	false
122962	interacts with	SMAD4 (interacts with) EXTL2	false
122963	interacts with	SMC3 (interacts with) FUT11	false
122964	interacts with	SMC3 (interacts with) MAN1A2	false
122965	interacts with	SMC3 (interacts with) ALG10B	false
122966	interacts with	SND1 (interacts with) SLC35A2	false
122967	interacts with	SSRP1 (interacts with) GANAB	false
122968	interacts with	STAT1 (interacts with) LAMP3	false
122969	interacts with	STAT1 (interacts with) HK3	false
122970	interacts with	STAT1 (interacts with) LIPA	false
122971	interacts with	STAT1 (interacts with) GM2A	false
122972	interacts with	STAT1 (interacts with) GCNT1	false
122973	interacts with	STAT1 (interacts with) NAGK	false
122974	interacts with	STAT2 (interacts with) GM2A	false
122975	interacts with	STAT4 (interacts with) FUT7	false
122976	interacts with	STAT4 (interacts with) ST8SIA4	false
122977	interacts with	STAT4 (interacts with) MFNG	false
122978	interacts with	STAT4 (interacts with) GBGT1	false
122979	interacts with	STAT4 (interacts with) FUCA1	false
122980	interacts with	STAT4 (interacts with) MGAT4A	false
122981	interacts with	STAT4 (interacts with) NAAA	false
122982	interacts with	STAT4 (interacts with) NDST2	false
122983	interacts with	STAT4 (interacts with) NAGK	false
122984	interacts with	STAT4 (interacts with) HS3ST3B1	false
122985	interacts with	STAT4 (interacts with) GCNT1	false
122986	interacts with	STAT4 (interacts with) CHST15	false
122987	interacts with	STAT4 (interacts with) MAN1A1	false
122988	interacts with	SUPT5H (interacts with) GPI	false
122989	interacts with	TAF1 (interacts with) MAN1A2	false
122990	interacts with	TAF1 (interacts with) OGT	false
122991	interacts with	TAF1 (interacts with) ALG10B	false
122992	interacts with	TAF1 (interacts with) FPGT	false
122993	interacts with	TAF3 (interacts with) FUT11	false
122994	interacts with	TBX21 (interacts with) FUT7	false
122995	interacts with	TBX21 (interacts with) LFNG	false
122996	interacts with	TCF12 (interacts with) RTF1	false
122997	interacts with	TCF12 (interacts with) COG3	false
122998	interacts with	TCF12 (interacts with) ALG10B	false
122999	interacts with	TCF12 (interacts with) B3GALT1	false
123000	interacts with	TCF7 (interacts with) MFNG	false
123001	interacts with	TCF7 (interacts with) CHST15	false
123002	interacts with	TCF7 (interacts with) MAN1A1	false
123003	interacts with	TCF7 (interacts with) HS3ST3B1	false
123004	interacts with	TCF7 (interacts with) ST8SIA4	false
123005	interacts with	TEAD1 (interacts with) FUT11	false
123006	interacts with	TEAD1 (interacts with) FAM20B	false
123007	interacts with	TEAD1 (interacts with) EXTL2	false
123008	interacts with	TERF2 (interacts with) COG8	false
123009	interacts with	TERF2 (interacts with) COG4	false
123010	interacts with	TFAP2A (interacts with) GCNT2	false
123011	interacts with	TFAP2A (interacts with) PIGY	false
123012	interacts with	TFAP2A (interacts with) MGAT5B	false
123013	interacts with	THAP11 (interacts with) COG8	false
123014	interacts with	THAP11 (interacts with) COG4	false
123015	interacts with	THAP11 (interacts with) ST3GAL2	false
123016	interacts with	TTF2 (interacts with) MAN1A2	false
123017	interacts with	TTF2 (interacts with) NEU3	false
123018	interacts with	VDR (interacts with) B4GALT1	false
123019	interacts with	VEZF1 (interacts with) ALG10B	false
123020	interacts with	VEZF1 (interacts with) ALG10	false
123021	interacts with	WDR5 (interacts with) DPM2	false
123022	interacts with	WDR5 (interacts with) POMT1	false
123023	interacts with	WDR5 (interacts with) MAN1B1	false
123024	interacts with	YAP1 (interacts with) GANAB	false
123025	interacts with	YAP1 (interacts with) ALG9	false
123026	interacts with	ZBTB17 (interacts with) MOGS	false
123027	interacts with	ZBTB17 (interacts with) GMPPA	false
123028	interacts with	ZBTB33 (interacts with) ALG10	false
123029	interacts with	ZBTB33 (interacts with) SLC35A3	false
123030	interacts with	ZBTB33 (interacts with) PIGA	false
123031	interacts with	ZBTB33 (interacts with) FPGT	false
