# Supplementary material for: A systems-based framework to computationally describe putative transcription factors and signaling pathways regulating glycan biosynthesis
Source: publisher site journal article supplement (doi:10.3762/bjoc.17.119), 2021-07-22
Supplement: Additional file 2 [file 1860-5397-17-119-S2.cys › CytoscapeSession-2021_03_21-12_01/tables/122667-SKCM/LOCAL_ATTRS-org.cytoscape.model.CyNode-SKCM+default+node.cytable]

CyCSV-Version	1
SUID	name	nodeType	selected
java.lang.Long	java.lang.String	java.lang.String	java.lang.Boolean
		mutable
SKCM default node
105684	ADNP	TF	false
105685	FUT7	Glycogene	false
105686	AFF4	TF	false
105687	MAN1A2	Glycogene	false
105688	STT3B	Glycogene	false
105689	NEU3	Glycogene	false
105690	FUT11	Glycogene	false
105694	MAN2A1	Glycogene	false
105985	UGCG	Glycogene	false
105704	ATF2	TF	false
105696	SLC35F5	Glycogene	false
105691	ACER2	Glycogene	false
105705	UGGT1	Glycogene	false
105695	SLC35A3	Glycogene	false
105824	COG6	Glycogene	false
105823	COG3	Glycogene	false
105844	EXTL2	Glycogene	false
105703	GALNT4	Glycogene	false
105710	ATF7IP	TF	false
105711	ALG10	Glycogene	false
105727	ALG10B	Glycogene	false
105712	ATRX	TF	false
105721	BATF	TF	false
105765	NAGK	Glycogene	false
106856	FUCA1	Glycogene	false
105776	LAMP3	Glycogene	false
105883	GM2A	Glycogene	false
105763	CHST12	Glycogene	false
105723	BATF3	TF	false
105859	HK3	Glycogene	false
105834	ST8SIA4	Glycogene	false
105725	BCAT1	TF	false
108552	GCNT1	Glycogene	false
105726	BMI1	TF	false
105728	BRCA1	TF	false
105733	BRD1	TF	false
105734	ALG12	Glycogene	false
106843	BRD4	TF	false
106844	SLC35E1	Glycogene	false
110789	BTAF1	TF	false
105738	CASP8AP2	TF	false
105752	CBX8	TF	false
105753	GALK1	Glycogene	false
106848	CDK12	TF	false
105756	CDK8	TF	false
105757	CDK9	TF	false
105758	DPM2	Glycogene	false
105760	MAN1B1	Glycogene	false
105746	ST6GALNAC6	Glycogene	false
105761	POMT1	Glycogene	false
105769	CHD1	TF	false
105715	CSGALNACT2	Glycogene	false
105770	CHD2	TF	false
105771	OGT	Glycogene	false
105774	CHD8	TF	false
106868	MGAT2	Glycogene	false
108023	POMT2	Glycogene	false
105775	CIITA	TF	false
105716	MAN1A1	Glycogene	false
106849	CLOCK	TF	false
105731	FAM20B	Glycogene	false
105780	CPSF3L	TF	false
105744	RFNG	Glycogene	false
105788	CREB3L4	TF	false
105789	B4GALT3	Glycogene	false
105790	CREBBP	TF	false
105794	CTNNB1	TF	false
107290	ASAH1	Glycogene	false
109675	GLB1	Glycogene	false
106850	DCP1A	TF	false
105795	DEK	TF	false
107281	SLC35B3	Glycogene	false
107985	DICER1	TF	false
107987	E2F4	TF	false
106892	COG4	Glycogene	false
106891	COG8	Glycogene	false
105806	ST3GAL2	Glycogene	false
105804	EBF1	TF	false
107328	PAPSS2	Glycogene	false
105979	SULF2	Glycogene	false
108010	CHST1	Glycogene	false
106883	SULF1	Glycogene	false
105768	A4GALT	Glycogene	false
108033	HS3ST3A1	Glycogene	false
105841	HS3ST3B1	Glycogene	false
105816	EGR2	TF	false
105766	MFNG	Glycogene	false
106861	CHST15	Glycogene	false
105822	ELF1	TF	false
106012	ALG5	Glycogene	false
105827	ELK4	TF	false
110794	ESRRA	TF	false
105754	B3GAT3	Glycogene	false
107286	ALG8	Glycogene	false
105839	ETS1	TF	false
105846	EZH1	TF	false
105976	FPGT	Glycogene	false
105848	FLI1	TF	false
106860	MGAT4A	Glycogene	false
106853	MAN1C1	Glycogene	false
105897	GBGT1	Glycogene	false
106839	ST6GALNAC4	Glycogene	false
106846	LFNG	Glycogene	false
113221	CHST4	Glycogene	false
105856	FOXO1	TF	false
106855	ST6GAL1	Glycogene	false
105858	FOXP3	TF	false
105861	GABPA	TF	false
106865	GPS2	TF	false
122677	GREB1	TF	false
108000	GALNT3	Glycogene	false
105868	GTF2B	TF	false
107992	ALG14	Glycogene	false
105871	GTF2I	TF	false
105692	COG5	Glycogene	false
105872	H2AFX	TF	false
105878	DPAGT1	Glycogene	false
105873	HCFC1	TF	false
105879	HSF1	TF	false
105880	TSTA3	Glycogene	false
105881	GPAA1	Glycogene	false
105882	IKZF1	TF	false
105772	NDST2	Glycogene	false
105884	LIPA	Glycogene	false
105779	DSE	Glycogene	false
107310	NAAA	Glycogene	false
105885	INO80	TF	false
105700	RTF1	Glycogene	false
105887	IRF1	TF	false
106871	IRF2	TF	false
106872	IRF3	TF	false
105888	IRF4	TF	false
107332	PIGY	Glycogene	false
105698	ST8SIA6	Glycogene	false
107296	GCNT2	Glycogene	false
108020	PIGB	Glycogene	false
105889	IRF5	TF	false
105890	IRF8	TF	false
107311	JARID2	TF	false
105894	JMJD6	TF	false
106005	COG1	Glycogene	false
107312	KAT2B	TF	false
106857	ST3GAL5	Glycogene	false
105900	KAT5	TF	false
106874	KDM4A	TF	false
105902	GNB1	Glycogene	false
105904	KDM5A	TF	false
105907	KDM5B	TF	false
107321	LIN9	TF	false
105911	LYL1	TF	false
105777	MAN2B1	Glycogene	false
105914	MAFB	TF	false
105916	MAZ	TF	false
105917	B4GALT2	Glycogene	false
105924	MED1	TF	false
106877	MEF2B	TF	false
107325	MEF2D	TF	false
105929	MITF	TF	false
107305	GNPDA1	Glycogene	false
111108	MXI1	TF	false
105945	NFIC	TF	false
107329	NFYA	TF	false
105730	PIGN	Glycogene	false
105946	NFYC	TF	false
108559	GALE	Glycogene	false
105947	NIPBL	TF	false
105702	SLC35A5	Glycogene	false
105948	NPAT	TF	false
110807	NR1H3	TF	false
105949	NR2C2	TF	false
107334	PHF8	TF	false
105958	PIAS1	TF	false
107336	PML	TF	false
105959	POLR2B	TF	false
105906	HS2ST1	Glycogene	false
105960	POLR3A	TF	false
105893	MGAT5	Glycogene	false
107293	HK1	Glycogene	false
122678	POLR3G	TF	false
106880	POU2F2	TF	false
106881	PPARA	TF	false
106882	GFPT1	Glycogene	false
105962	PRDM1	TF	false
105965	RB1	TF	false
105966	UGGT2	Glycogene	false
105967	RBBP5	TF	false
105973	COG2	Glycogene	false
105968	RBL2	TF	false
105969	RCOR1	TF	false
105855	GNPNAT1	Glycogene	false
108024	RELA	TF	false
105998	GANAB	Glycogene	false
105970	REST	TF	false
105974	RFX7	TF	false
108613	RING1	TF	false
108572	SLC35B2	Glycogene	false
105975	RNF2	TF	false
105978	RUNX1	TF	false
107339	SETDB1	TF	false
108615	SFMBT1	TF	false
105987	SMAD4	TF	false
106014	GALNT1	Glycogene	false
105990	SMC3	TF	false
110812	SND1	TF	false
107335	SLC35A2	Glycogene	false
105997	SSRP1	TF	false
105999	STAT1	TF	false
106001	STAT2	TF	false
106002	STAT4	TF	false
108622	SUPT5H	TF	false
106864	GPI	Glycogene	false
106006	TAF1	TF	false
107351	TAF3	TF	false
106889	TBX21	TF	false
106007	TCF12	TF	false
105818	B3GALT1	Glycogene	false
106008	TCF7	TF	false
106013	TEAD1	TF	false
107353	TERF2	TF	false
118340	TFAP2A	TF	false
108014	MGAT5B	Glycogene	false
106890	THAP11	TF	false
106019	TTF2	TF	false
107356	VDR	TF	false
107274	B4GALT1	Glycogene	false
106023	VEZF1	TF	false
106024	WDR5	TF	false
106026	YAP1	TF	false
108554	ALG9	Glycogene	false
106029	ZBTB17	TF	false
105762	MOGS	Glycogene	false
105787	GMPPA	Glycogene	false
106031	ZBTB33	TF	false
108027	PIGA	Glycogene	false
