# Supplementary material for: A systems-based framework to computationally describe putative transcription factors and signaling pathways regulating glycan biosynthesis
Source: publisher site journal article supplement (doi:10.3762/bjoc.17.119), 2021-07-22
Supplement: Additional file 2 [file 1860-5397-17-119-S2.cys › CytoscapeSession-2021_03_21-12_01/tables/123032-STES/LOCAL_ATTRS-org.cytoscape.model.CyEdge-STES+default+edge.cytable]

CyCSV-Version	1
SUID	interaction	name	selected
java.lang.Long	java.lang.String	java.lang.String	java.lang.Boolean
STES default edge
123044	interacts with	ADNP (interacts with) FUT7	false
123045	interacts with	AFF4 (interacts with) MAN1A2	false
123046	interacts with	AFF4 (interacts with) MAN2A1	false
123047	interacts with	AFF4 (interacts with) UGCG	false
123048	interacts with	AHR (interacts with) UGCG	false
123049	interacts with	AHR (interacts with) GALNT5	false
123050	interacts with	ARID3A (interacts with) POFUT1	false
123051	interacts with	ASCL2 (interacts with) KHK	false
123052	interacts with	ATF2 (interacts with) MAN1A2	false
123053	interacts with	ATF2 (interacts with) MAN2A1	false
123054	interacts with	ATF2 (interacts with) NEU3	false
123055	interacts with	ATF2 (interacts with) UGGT1	false
123056	interacts with	ATF2 (interacts with) STT3B	false
123057	interacts with	ATF2 (interacts with) SLC35A5	false
123058	interacts with	ATF2 (interacts with) ALG10	false
123059	interacts with	ATF2 (interacts with) GNS	false
123060	interacts with	ATF2 (interacts with) MAN1A1	false
123061	interacts with	BACH1 (interacts with) CSGALNACT2	false
123062	interacts with	BATF3 (interacts with) HK3	false
123063	interacts with	BATF3 (interacts with) MGAT1	false
123064	interacts with	BATF3 (interacts with) ST8SIA4	false
123065	interacts with	BATF3 (interacts with) CHST11	false
123066	interacts with	BCL6 (interacts with) CHST15	false
123067	interacts with	BCL6 (interacts with) ST6GALNAC6	false
123068	interacts with	BCL6 (interacts with) ST3GAL3	false
123069	interacts with	BCL6 (interacts with) ARSB	false
123070	interacts with	BCL6 (interacts with) GFPT2	false
123071	interacts with	BCL6 (interacts with) DSEL	false
123072	interacts with	BCL6 (interacts with) A4GALT	false
123073	interacts with	BCL6 (interacts with) EXTL1	false
123074	interacts with	BCL6 (interacts with) CHST11	false
123075	interacts with	BCL6 (interacts with) CHST3	false
123076	interacts with	BCL6 (interacts with) ST6GALNAC5	false
123077	interacts with	BCL6 (interacts with) ST6GAL2	false
123078	interacts with	BCL6 (interacts with) SLC35F1	false
123079	interacts with	BCOR (interacts with) MAN2A2	false
123080	interacts with	BRCA1 (interacts with) PIGW	false
123081	interacts with	BRCA1 (interacts with) ALG10	false
123082	interacts with	BRCA1 (interacts with) UGGT1	false
123083	interacts with	BRCA1 (interacts with) PIGO	false
123084	interacts with	BRCA1 (interacts with) COG2	false
123085	interacts with	BRCA1 (interacts with) PIGA	false
123086	interacts with	BRD1 (interacts with) ALG12	false
123087	interacts with	C17orf49 (interacts with) B3GAT3	false
123088	interacts with	CBFA2T3 (interacts with) A4GALT	false
123089	interacts with	CBFB (interacts with) SLC35F2	false
123090	interacts with	CBX3 (interacts with) DPM1	false
123091	interacts with	CBX3 (interacts with) ALG5	false
123092	interacts with	CBX3 (interacts with) ALG8	false
123093	interacts with	CBX3 (interacts with) PIGF	false
123094	interacts with	CBX3 (interacts with) PIGW	false
123095	interacts with	CBX6 (interacts with) ST3GAL2	false
123096	interacts with	CBX6 (interacts with) EXTL1	false
123097	interacts with	CBX7 (interacts with) ST6GALNAC6	false
123098	interacts with	CBX7 (interacts with) MAN1C1	false
123099	interacts with	CBX7 (interacts with) MFNG	false
123100	interacts with	CBX7 (interacts with) ST8SIA1	false
123101	interacts with	CBX7 (interacts with) ST3GAL3	false
123102	interacts with	CBX7 (interacts with) CHST15	false
123103	interacts with	CBX7 (interacts with) CHST8	false
123104	interacts with	CBX7 (interacts with) ARSB	false
123105	interacts with	CBX7 (interacts with) SLC35F1	false
123106	interacts with	CBX7 (interacts with) CHST7	false
123107	interacts with	CBX7 (interacts with) XYLT1	false
123108	interacts with	CBX8 (interacts with) GALK1	false
123109	interacts with	CBX8 (interacts with) DDOST	false
123110	interacts with	CDK12 (interacts with) GANAB	false
123111	interacts with	CDK8 (interacts with) COG3	false
123112	interacts with	CDK8 (interacts with) B3GALNT2	false
123113	interacts with	CDX2 (interacts with) POFUT1	false
123114	interacts with	CDX2 (interacts with) B3GNT8	false
123115	interacts with	CDX2 (interacts with) CHST5	false
123116	interacts with	CDX2 (interacts with) MGAT4A	false
123117	interacts with	CDX2 (interacts with) GALNT8	false
123118	interacts with	CEBPA (interacts with) B3GNT8	false
123119	interacts with	CEBPB (interacts with) CHST12	false
123120	interacts with	CEBPB (interacts with) CHST14	false
123121	interacts with	CEBPB (interacts with) RENBP	false
123122	interacts with	CEBPB (interacts with) B3GALT6	false
123123	interacts with	CHD1 (interacts with) MAN2A1	false
123124	interacts with	CHD1 (interacts with) OGT	false
123125	interacts with	CHD2 (interacts with) OGT	false
123126	interacts with	CHD8 (interacts with) NEU3	false
123127	interacts with	CHD8 (interacts with) STT3B	false
123128	interacts with	CHD8 (interacts with) UGGT1	false
123129	interacts with	CHD8 (interacts with) OGT	false
123130	interacts with	CHD8 (interacts with) GNS	false
123131	interacts with	CHD8 (interacts with) MAN2A2	false
123132	interacts with	CIITA (interacts with) FUT7	false
123133	interacts with	CIITA (interacts with) LAMP3	false
123134	interacts with	CIITA (interacts with) GM2A	false
123135	interacts with	CPSF3L (interacts with) B3GALT6	false
123136	interacts with	CREBBP (interacts with) NDST2	false
123137	interacts with	CSNK2A1 (interacts with) STT3A	false
123138	interacts with	CTBP1 (interacts with) B3GAT3	false
123139	interacts with	CTBP1 (interacts with) B4GALT7	false
123140	interacts with	CTNNB1 (interacts with) STT3B	false
123141	interacts with	CTNNB1 (interacts with) GLCE	false
123142	interacts with	DEK (interacts with) SLC35B3	false
123143	interacts with	E2F1 (interacts with) PIGW	false
123144	interacts with	E2F1 (interacts with) GALK1	false
123145	interacts with	E2F1 (interacts with) ALG3	false
123146	interacts with	E2F1 (interacts with) SLC35B1	false
123147	interacts with	E2F1 (interacts with) DPM1	false
123148	interacts with	E2F1 (interacts with) DPM2	false
123149	interacts with	E2F1 (interacts with) SLC35C2	false
123150	interacts with	E2F1 (interacts with) RPN1	false
123151	interacts with	E2F1 (interacts with) RPN2	false
123152	interacts with	E2F1 (interacts with) MOGS	false
123153	interacts with	E2F1 (interacts with) B3GALT6	false
123154	interacts with	E2F1 (interacts with) GANAB	false
123155	interacts with	E2F1 (interacts with) B4GALT3	false
123156	interacts with	E2F1 (interacts with) GPAA1	false
123157	interacts with	E2F1 (interacts with) DDOST	false
123158	interacts with	E2F3 (interacts with) PIGW	false
123159	interacts with	E2F3 (interacts with) POFUT1	false
123160	interacts with	E2F6 (interacts with) PIGW	false
123161	interacts with	E2F6 (interacts with) DPM1	false
123162	interacts with	E2F7 (interacts with) ALG10	false
123163	interacts with	E2F7 (interacts with) PIGW	false
123164	interacts with	E2F7 (interacts with) ALG6	false
123165	interacts with	E2F8 (interacts with) GANAB	false
123166	interacts with	E2F8 (interacts with) PIGO	false
123167	interacts with	EBF1 (interacts with) CSGALNACT1	false
123168	interacts with	EBF1 (interacts with) CHST3	false
123169	interacts with	EBF1 (interacts with) EXTL1	false
123170	interacts with	EBF1 (interacts with) ST6GALNAC6	false
123171	interacts with	EBF1 (interacts with) A4GALT	false
123172	interacts with	EBF1 (interacts with) ST3GAL3	false
123173	interacts with	EBF1 (interacts with) GBGT1	false
123174	interacts with	EBF1 (interacts with) CHST15	false
123175	interacts with	EBF1 (interacts with) ST3GAL6	false
123176	interacts with	EBF1 (interacts with) ST3GAL5	false
123177	interacts with	EED (interacts with) ALG8	false
123178	interacts with	EED (interacts with) DPM1	false
123179	interacts with	EGR2 (interacts with) GFPT2	false
123180	interacts with	EGR2 (interacts with) SULF1	false
123181	interacts with	EGR2 (interacts with) CHSY3	false
123182	interacts with	EGR2 (interacts with) CSGALNACT2	false
123183	interacts with	EGR2 (interacts with) MFNG	false
123184	interacts with	EGR2 (interacts with) MGAT1	false
123185	interacts with	EGR2 (interacts with) CHST11	false
123186	interacts with	EGR2 (interacts with) HS3ST3B1	false
123187	interacts with	EGR2 (interacts with) CHST15	false
123188	interacts with	EGR2 (interacts with) ARSB	false
123189	interacts with	EGR2 (interacts with) ST8SIA1	false
123190	interacts with	EGR2 (interacts with) GM2A	false
123191	interacts with	EGR2 (interacts with) ST3GAL5	false
123192	interacts with	EGR2 (interacts with) GAL3ST4	false
123193	interacts with	EGR2 (interacts with) NAGK	false
123194	interacts with	EGR2 (interacts with) ST6GALNAC5	false
123195	interacts with	EGR2 (interacts with) ST6GALNAC6	false
123196	interacts with	EGR2 (interacts with) HAS1	false
123197	interacts with	EGR2 (interacts with) FUT11	false
123198	interacts with	EGR2 (interacts with) EXTL1	false
123199	interacts with	EGR2 (interacts with) ST3GAL3	false
123200	interacts with	EGR2 (interacts with) A4GALT	false
123201	interacts with	EHF (interacts with) SLC35A3	false
123202	interacts with	EHF (interacts with) ALG10	false
123203	interacts with	EHF (interacts with) STT3B	false
123204	interacts with	EHMT2 (interacts with) MOGS	false
123205	interacts with	EHMT2 (interacts with) B3GALT6	false
123206	interacts with	ELF1 (interacts with) COG3	false
123207	interacts with	ELF1 (interacts with) COG6	false
123208	interacts with	ELK3 (interacts with) FUT11	false
123209	interacts with	ELK4 (interacts with) FAM20B	false
123210	interacts with	EP400 (interacts with) STT3B	false
123211	interacts with	EP400 (interacts with) POMT2	false
123212	interacts with	EP400 (interacts with) MAN2A2	false
123213	interacts with	ERCC6 (interacts with) MAN1A2	false
123214	interacts with	ERCC6 (interacts with) STT3B	false
123215	interacts with	ERCC6 (interacts with) UGGT1	false
123216	interacts with	ERCC6 (interacts with) MAN2A2	false
123217	interacts with	ERCC6 (interacts with) B3GALNT2	false
123218	interacts with	ERCC6 (interacts with) GLCE	false
123219	interacts with	ERG (interacts with) MFNG	false
123220	interacts with	ERG (interacts with) CHSY3	false
123221	interacts with	ERG (interacts with) ST6GALNAC3	false
123222	interacts with	ERG (interacts with) ST8SIA4	false
123223	interacts with	ERG (interacts with) NDST1	false
123224	interacts with	ERG (interacts with) ARSB	false
123225	interacts with	ERG (interacts with) CHST15	false
123226	interacts with	ERG (interacts with) MAN1C1	false
123227	interacts with	ERG (interacts with) ST3GAL2	false
123228	interacts with	ERG (interacts with) ST6GALNAC6	false
123229	interacts with	ERG (interacts with) CHST3	false
123230	interacts with	ERG (interacts with) ST3GAL3	false
123231	interacts with	ERG (interacts with) CSGALNACT2	false
123232	interacts with	ERG (interacts with) SMPD1	false
123233	interacts with	ERG (interacts with) ST8SIA1	false
123234	interacts with	ERG (interacts with) HAS1	false
123235	interacts with	ERG (interacts with) CHST11	false
123236	interacts with	ERG (interacts with) EXTL1	false
123237	interacts with	ERG (interacts with) GBGT1	false
123238	interacts with	ERG (interacts with) HS3ST3B1	false
123239	interacts with	ESRRA (interacts with) TSTA3	false
123240	interacts with	ESRRA (interacts with) GALE	false
123241	interacts with	ESRRA (interacts with) B3GNT3	false
123242	interacts with	ESRRA (interacts with) PMM2	false
123243	interacts with	ESRRA (interacts with) MGAT4B	false
123244	interacts with	ETS1 (interacts with) CHST11	false
123245	interacts with	ETS1 (interacts with) MFNG	false
123246	interacts with	ETS1 (interacts with) ST8SIA4	false
123247	interacts with	ETS1 (interacts with) NDST1	false
123248	interacts with	ETS1 (interacts with) ST6GALNAC3	false
123249	interacts with	ETS1 (interacts with) GFPT2	false
123250	interacts with	ETS1 (interacts with) CSGALNACT1	false
123251	interacts with	ETS1 (interacts with) ST3GAL5	false
123252	interacts with	ETS1 (interacts with) ST8SIA1	false
123253	interacts with	ETS1 (interacts with) CHST15	false
123254	interacts with	ETS1 (interacts with) HS3ST3B1	false
123255	interacts with	ETS1 (interacts with) FUT7	false
123256	interacts with	ETS1 (interacts with) GM2A	false
123257	interacts with	ETS1 (interacts with) CHST2	false
123258	interacts with	ETS1 (interacts with) ST6GALNAC6	false
123259	interacts with	ETS1 (interacts with) CHST1	false
123260	interacts with	ETV1 (interacts with) SULF1	false
123261	interacts with	EZH2 (interacts with) PIGW	false
123262	interacts with	EZH2 (interacts with) ALG6	false
123263	interacts with	FANCD2 (interacts with) PIGW	false
123264	interacts with	FLI1 (interacts with) MFNG	false
123265	interacts with	FLI1 (interacts with) ST8SIA4	false
123266	interacts with	FLI1 (interacts with) ST3GAL2	false
123267	interacts with	FLI1 (interacts with) MAN1C1	false
123268	interacts with	FLI1 (interacts with) CHST11	false
123269	interacts with	FLI1 (interacts with) CHST15	false
123270	interacts with	FLI1 (interacts with) ST8SIA1	false
123271	interacts with	FLI1 (interacts with) ST3GAL5	false
123272	interacts with	FLI1 (interacts with) CSGALNACT2	false
123273	interacts with	FLI1 (interacts with) NDST1	false
123274	interacts with	FLI1 (interacts with) HS3ST3B1	false
123275	interacts with	FLI1 (interacts with) CHST2	false
123276	interacts with	FLI1 (interacts with) ST6GALNAC6	false
123277	interacts with	FLI1 (interacts with) ST3GAL6	false
123278	interacts with	FLI1 (interacts with) ARSB	false
123279	interacts with	FLI1 (interacts with) EXTL1	false
123280	interacts with	FOSL2 (interacts with) UGCG	false
123281	interacts with	FOXA2 (interacts with) SLC35C2	false
123282	interacts with	FOXA2 (interacts with) RPN2	false
123283	interacts with	FOXD2 (interacts with) CTSA	false
123284	interacts with	FOXK1 (interacts with) EXTL3	false
123285	interacts with	FOXM1 (interacts with) ALG10	false
123286	interacts with	FOXM1 (interacts with) GANAB	false
123287	interacts with	FOXM1 (interacts with) PIGW	false
123288	interacts with	FOXM1 (interacts with) RPN2	false
123289	interacts with	FOXM1 (interacts with) GPI	false
123290	interacts with	FOXO1 (interacts with) CSGALNACT2	false
123291	interacts with	FOXO1 (interacts with) HAS2	false
123292	interacts with	FOXP3 (interacts with) FUT7	false
123293	interacts with	FOXP3 (interacts with) ST8SIA4	false
123294	interacts with	FOXP3 (interacts with) HK3	false
123295	interacts with	FOXP3 (interacts with) CHST11	false
123296	interacts with	FOXP3 (interacts with) LIPA	false
123297	interacts with	FOXP3 (interacts with) ST8SIA1	false
123298	interacts with	FOXP3 (interacts with) GAL3ST4	false
123299	interacts with	FOXP3 (interacts with) ST3GAL5	false
123300	interacts with	FOXP3 (interacts with) RENBP	false
123301	interacts with	FOXP3 (interacts with) NPL	false
123302	interacts with	FOXP3 (interacts with) MGAT1	false
123303	interacts with	FOXP3 (interacts with) HS3ST3B1	false
123304	interacts with	GABPA (interacts with) SLC35A5	false
123305	interacts with	GABPA (interacts with) CSGALNACT2	false
123306	interacts with	GABPA (interacts with) B3GALNT2	false
123307	interacts with	GABPA (interacts with) MAN1A2	false
123308	interacts with	GAPDH (interacts with) GPI	false
123309	interacts with	GATA3 (interacts with) CHST11	false
123310	interacts with	GATA3 (interacts with) ST8SIA1	false
123311	interacts with	GATA3 (interacts with) GM2A	false
123312	interacts with	GATA3 (interacts with) ST8SIA4	false
123313	interacts with	GATA3 (interacts with) ST6GALNAC6	false
123314	interacts with	GATA6 (interacts with) FUT4	false
123315	interacts with	GLI1 (interacts with) SULF1	false
123316	interacts with	GLI1 (interacts with) GFPT2	false
123317	interacts with	GLI1 (interacts with) MAN1C1	false
123318	interacts with	GLI2 (interacts with) FUT11	false
123319	interacts with	GLYR1 (interacts with) ALG1	false
123320	interacts with	GMEB2 (interacts with) MOGS	false
123321	interacts with	GMEB2 (interacts with) PIGO	false
123322	interacts with	GPS2 (interacts with) DAD1	false
123323	interacts with	GRHL1 (interacts with) B3GNT5	false
123324	interacts with	GTF2B (interacts with) PIGF	false
123325	interacts with	GTF2I (interacts with) COG5	false
123326	interacts with	GTF2I (interacts with) MGAT5	false
123327	interacts with	GTF2I (interacts with) NEU3	false
123328	interacts with	GTF3C2 (interacts with) GANAB	false
123329	interacts with	H2AFX (interacts with) DPM2	false
123330	interacts with	H2AFX (interacts with) B3GAT3	false
123331	interacts with	H2AFX (interacts with) B3GALT6	false
123332	interacts with	H2AFX (interacts with) DPAGT1	false
123333	interacts with	H2AFX (interacts with) SLC35B1	false
123334	interacts with	H2AFX (interacts with) GPI	false
123335	interacts with	H2AFX (interacts with) GPAA1	false
123336	interacts with	H2AFX (interacts with) B4GALT3	false
123337	interacts with	HCFC1 (interacts with) NEU3	false
123338	interacts with	HCFC1 (interacts with) PIGO	false
123339	interacts with	HCFC1 (interacts with) UGGT1	false
123340	interacts with	HCFC1 (interacts with) GANAB	false
123341	interacts with	HCFC1 (interacts with) MAN2A2	false
123342	interacts with	HDAC1 (interacts with) DDOST	false
123343	interacts with	HDAC2 (interacts with) DPM1	false
123344	interacts with	HECTD1 (interacts with) UGCG	false
123345	interacts with	HEYL (interacts with) EXTL1	false
123346	interacts with	HEYL (interacts with) CHST7	false
123347	interacts with	HIF1A (interacts with) CHSY1	false
123348	interacts with	HMGN1 (interacts with) DPM1	false
123349	interacts with	HNF1B (interacts with) B4GALT4	false
123350	interacts with	HNF4A (interacts with) POFUT1	false
123351	interacts with	HNF4A (interacts with) B4GALT5	false
123352	interacts with	HNF4A (interacts with) SLC35D1	false
123353	interacts with	HNF4A (interacts with) SLC35C2	false
123354	interacts with	HNF4A (interacts with) PIGO	false
123355	interacts with	HNF4A (interacts with) MGAT4B	false
123356	interacts with	HNF4A (interacts with) ALG11	false
123357	interacts with	HNF4A (interacts with) MGAT4A	false
123358	interacts with	HNF4G (interacts with) SLC35A3	false
123359	interacts with	HNF4G (interacts with) SULT1B1	false
123360	interacts with	HNF4G (interacts with) COG3	false
123361	interacts with	HNF4G (interacts with) GALK2	false
123362	interacts with	HNF4G (interacts with) SLC17A5	false
123363	interacts with	HNF4G (interacts with) CHST5	false
123364	interacts with	HNF4G (interacts with) GCNT1	false
123365	interacts with	HOXA13 (interacts with) GCNT3	false
123366	interacts with	HOXA4 (interacts with) GBGT1	false
123367	interacts with	HSF1 (interacts with) TSTA3	false
123368	interacts with	HSF1 (interacts with) GPAA1	false
123369	interacts with	HSF1 (interacts with) RFNG	false
123370	interacts with	HSF1 (interacts with) DPM2	false
123371	interacts with	HSF1 (interacts with) B4GALT2	false
123372	interacts with	HSF1 (interacts with) B3GAT3	false
123373	interacts with	HSF1 (interacts with) ALG3	false
123374	interacts with	HSF1 (interacts with) B4GALT3	false
123375	interacts with	IKZF1 (interacts with) MFNG	false
123376	interacts with	IKZF1 (interacts with) ST8SIA4	false
123377	interacts with	IKZF1 (interacts with) LAMP3	false
123378	interacts with	IKZF1 (interacts with) MAN2B1	false
123379	interacts with	IKZF1 (interacts with) GM2A	false
123380	interacts with	IKZF1 (interacts with) ST3GAL5	false
123381	interacts with	IKZF1 (interacts with) MAN1C1	false
123382	interacts with	IKZF1 (interacts with) NDST2	false
123383	interacts with	IKZF1 (interacts with) LIPA	false
123384	interacts with	IKZF1 (interacts with) DSE	false
123385	interacts with	IKZF1 (interacts with) NAGK	false
123386	interacts with	IKZF1 (interacts with) NPL	false
123387	interacts with	IKZF1 (interacts with) CSGALNACT2	false
123388	interacts with	IKZF1 (interacts with) ST6GALNAC6	false
123389	interacts with	IRF1 (interacts with) HK3	false
123390	interacts with	IRF1 (interacts with) LAMP3	false
123391	interacts with	IRF4 (interacts with) MFNG	false
123392	interacts with	IRF4 (interacts with) FUT7	false
123393	interacts with	IRF4 (interacts with) ST8SIA4	false
123394	interacts with	IRF4 (interacts with) ST8SIA1	false
123395	interacts with	IRF4 (interacts with) ST3GAL5	false
123396	interacts with	IRF4 (interacts with) GM2A	false
123397	interacts with	IRF4 (interacts with) LAMP3	false
123398	interacts with	IRF4 (interacts with) CHST11	false
123399	interacts with	IRF4 (interacts with) CHST2	false
123400	interacts with	IRF4 (interacts with) HS3ST3B1	false
123401	interacts with	ISL1 (interacts with) MAN1C1	false
123402	interacts with	ISL1 (interacts with) ST8SIA1	false
123403	interacts with	JMJD1C (interacts with) MAN1A2	false
123404	interacts with	JMJD1C (interacts with) IDS	false
123405	interacts with	JMJD1C (interacts with) OGT	false
123406	interacts with	KDM1A (interacts with) DDOST	false
123407	interacts with	KDM3A (interacts with) COG3	false
123408	interacts with	KDM4A (interacts with) GANAB	false
123409	interacts with	KDM4A (interacts with) MAN2A2	false
123410	interacts with	KLF4 (interacts with) UGCG	false
123411	interacts with	KLF4 (interacts with) ACER2	false
123412	interacts with	KLF4 (interacts with) B3GNT6	false
123413	interacts with	KLF4 (interacts with) ST6GALNAC1	false
123414	interacts with	KLF4 (interacts with) B4GALNT3	false
123415	interacts with	KLF5 (interacts with) SLC35A3	false
123416	interacts with	KLF5 (interacts with) COG6	false
123417	interacts with	KLF5 (interacts with) GFPT1	false
123418	interacts with	LDB1 (interacts with) ST6GALNAC6	false
123419	interacts with	LEF1 (interacts with) SULF1	false
123420	interacts with	LEF1 (interacts with) ST8SIA4	false
123421	interacts with	LEF1 (interacts with) CHST11	false
123422	interacts with	LEF1 (interacts with) ST6GAL2	false
123423	interacts with	LEF1 (interacts with) ST8SIA1	false
123424	interacts with	LEF1 (interacts with) CHSY3	false
123425	interacts with	LEF1 (interacts with) HS3ST3A1	false
123426	interacts with	LEF1 (interacts with) ARSB	false
123427	interacts with	LEF1 (interacts with) ST6GALNAC5	false
123428	interacts with	LEF1 (interacts with) MFNG	false
123429	interacts with	LEF1 (interacts with) DSEL	false
123430	interacts with	LEF1 (interacts with) DSE	false
123431	interacts with	LEF1 (interacts with) CHST1	false
123432	interacts with	LEF1 (interacts with) HS3ST3B1	false
123433	interacts with	LEF1 (interacts with) IDS	false
123434	interacts with	LEF1 (interacts with) ST3GAL3	false
123435	interacts with	LEF1 (interacts with) SLC35F1	false
123436	interacts with	LEF1 (interacts with) HAS2	false
123437	interacts with	LEF1 (interacts with) A4GALT	false
123438	interacts with	LEF1 (interacts with) CHST10	false
123439	interacts with	LEF1 (interacts with) SULT1C4	false
123440	interacts with	LEF1 (interacts with) CHST15	false
123441	interacts with	LEF1 (interacts with) CHST7	false
123442	interacts with	LEF1 (interacts with) CHST8	false
123443	interacts with	LEF1 (interacts with) MGAT5B	false
123444	interacts with	LMO2 (interacts with) ST8SIA4	false
123445	interacts with	LMO2 (interacts with) ST6GALNAC3	false
123446	interacts with	LMO2 (interacts with) CSGALNACT1	false
123447	interacts with	LMO2 (interacts with) ST3GAL5	false
123448	interacts with	LMO2 (interacts with) ST8SIA1	false
123449	interacts with	LMO2 (interacts with) SMPD1	false
123450	interacts with	LMO2 (interacts with) CHST11	false
123451	interacts with	LMO2 (interacts with) CHST15	false
123452	interacts with	LMO2 (interacts with) CSGALNACT2	false
123453	interacts with	LYL1 (interacts with) MFNG	false
123454	interacts with	LYL1 (interacts with) FUT7	false
123455	interacts with	LYL1 (interacts with) MAN2B1	false
123456	interacts with	LYL1 (interacts with) MGAT1	false
123457	interacts with	LYL1 (interacts with) RENBP	false
123458	interacts with	LYL1 (interacts with) CHST12	false
123459	interacts with	LYL1 (interacts with) ST6GALNAC6	false
123460	interacts with	LYL1 (interacts with) ST8SIA4	false
123461	interacts with	LYL1 (interacts with) ST3GAL2	false
123462	interacts with	LYL1 (interacts with) ST3GAL5	false
123463	interacts with	LYL1 (interacts with) CHST11	false
123464	interacts with	LYL1 (interacts with) CHST15	false
123465	interacts with	LYL1 (interacts with) ST6GALNAC5	false
123466	interacts with	MAF (interacts with) ST8SIA4	false
123467	interacts with	MAF (interacts with) GFPT2	false
123468	interacts with	MAF (interacts with) ST8SIA1	false
123469	interacts with	MAF (interacts with) ARSB	false
123470	interacts with	MAF (interacts with) ST6GALNAC5	false
123471	interacts with	MAF (interacts with) CHST11	false
123472	interacts with	MAF (interacts with) B4GALNT1	false
123473	interacts with	MAF (interacts with) GBGT1	false
123474	interacts with	MAF (interacts with) ST3GAL2	false
123475	interacts with	MAF (interacts with) DSEL	false
123476	interacts with	MAF (interacts with) RENBP	false
123477	interacts with	MAF (interacts with) ST6GALNAC6	false
123478	interacts with	MAF (interacts with) ST3GAL6	false
123479	interacts with	MAF (interacts with) EXTL1	false
123480	interacts with	MAF (interacts with) CHST15	false
123481	interacts with	MAF (interacts with) ST3GAL3	false
123482	interacts with	MAF (interacts with) A4GALT	false
123483	interacts with	MAF (interacts with) ST3GAL5	false
123484	interacts with	MAF (interacts with) MGAT1	false
123485	interacts with	MAFB (interacts with) DSE	false
123486	interacts with	MAZ (interacts with) PIGQ	false
123487	interacts with	MAZ (interacts with) B4GALT2	false
123488	interacts with	MAZ (interacts with) B3GALT6	false
123489	interacts with	MAZ (interacts with) B3GAT3	false
123490	interacts with	MAZ (interacts with) ALG3	false
123491	interacts with	MAZ (interacts with) GALK1	false
123492	interacts with	MAZ (interacts with) MOGS	false
123493	interacts with	MAZ (interacts with) GPAA1	false
123494	interacts with	MAZ (interacts with) B4GALT3	false
123495	interacts with	MAZ (interacts with) SLC35C2	false
123496	interacts with	MAZ (interacts with) ALG1	false
123497	interacts with	MAZ (interacts with) DDOST	false
123498	interacts with	MAZ (interacts with) ALG12	false
123499	interacts with	MECOM (interacts with) ST6GALNAC1	false
123500	interacts with	MECOM (interacts with) GALNT7	false
123501	interacts with	MECP2 (interacts with) ST3GAL3	false
123502	interacts with	MECP2 (interacts with) CHST15	false
123503	interacts with	MECP2 (interacts with) MGAT5B	false
123504	interacts with	MECP2 (interacts with) ST6GALNAC6	false
123505	interacts with	MECP2 (interacts with) A4GALT	false
123506	interacts with	MED12 (interacts with) MAN2A2	false
123507	interacts with	MEF2A (interacts with) FUT11	false
123508	interacts with	MEF2A (interacts with) CSGALNACT2	false
123509	interacts with	MEF2A (interacts with) ST6GALNAC3	false
123510	interacts with	MEF2A (interacts with) MAN1C1	false
123511	interacts with	MEF2A (interacts with) DSEL	false
123512	interacts with	MEF2B (interacts with) CHST2	false
123513	interacts with	MEF2B (interacts with) FUT7	false
123514	interacts with	MEF2C (interacts with) MAN1C1	false
123515	interacts with	MEF2C (interacts with) ST6GALNAC3	false
123516	interacts with	MEF2C (interacts with) ARSB	false
123517	interacts with	MEF2C (interacts with) SLC35F1	false
123518	interacts with	MEF2C (interacts with) ST8SIA1	false
123519	interacts with	MEF2C (interacts with) DSEL	false
123520	interacts with	MEF2C (interacts with) ST6GALNAC5	false
123521	interacts with	MEF2C (interacts with) GFPT2	false
123522	interacts with	MEF2C (interacts with) CHST10	false
123523	interacts with	MEF2C (interacts with) CHST11	false
123524	interacts with	MEF2C (interacts with) CHST8	false
123525	interacts with	MEF2D (interacts with) SMPD1	false
123526	interacts with	MEIS1 (interacts with) CHST3	false
123527	interacts with	MEIS1 (interacts with) GFPT2	false
123528	interacts with	MEIS1 (interacts with) CSGALNACT1	false
123529	interacts with	MEIS1 (interacts with) ARSB	false
123530	interacts with	MEIS1 (interacts with) ST8SIA1	false
123531	interacts with	MEIS1 (interacts with) SULF1	false
123532	interacts with	MEIS1 (interacts with) CSGALNACT2	false
123533	interacts with	MEIS1 (interacts with) EXTL2	false
123534	interacts with	MEIS1 (interacts with) ST3GAL3	false
123535	interacts with	MEIS1 (interacts with) ST6GALNAC6	false
123536	interacts with	MEIS3 (interacts with) ST8SIA1	false
123537	interacts with	MRE11A (interacts with) NEU3	false
123538	interacts with	MRE11A (interacts with) DPM1	false
123539	interacts with	MXD3 (interacts with) DPM2	false
123540	interacts with	MYB (interacts with) KHK	false
123541	interacts with	MYBL2 (interacts with) RPN2	false
123542	interacts with	MYBL2 (interacts with) ALG3	false
123543	interacts with	MYBL2 (interacts with) DPM1	false
123544	interacts with	MYBL2 (interacts with) SLC35B1	false
123545	interacts with	MYBL2 (interacts with) GALK1	false
123546	interacts with	MYBL2 (interacts with) B4GALT3	false
123547	interacts with	MYBL2 (interacts with) MOGS	false
123548	interacts with	MYBL2 (interacts with) GPAA1	false
123549	interacts with	MYH11 (interacts with) SULF1	false
123550	interacts with	MYH11 (interacts with) ST3GAL3	false
123551	interacts with	NCOR1 (interacts with) PIGL	false
123552	interacts with	NFIC (interacts with) FUT11	false
123553	interacts with	NFIC (interacts with) ST3GAL3	false
123554	interacts with	NFIC (interacts with) ST6GALNAC6	false
123555	interacts with	NFIC (interacts with) CHST7	false
123556	interacts with	NIPBL (interacts with) UGGT1	false
123557	interacts with	NIPBL (interacts with) FKTN	false
123558	interacts with	NIPBL (interacts with) COG3	false
123559	interacts with	NR2C2 (interacts with) STT3B	false
123560	interacts with	NR2C2 (interacts with) FKTN	false
123561	interacts with	NR2C2 (interacts with) OGT	false
123562	interacts with	NR2C2 (interacts with) FAM20B	false
123563	interacts with	NR2C2 (interacts with) UGGT1	false
123564	interacts with	NR2C2 (interacts with) B3GALNT2	false
123565	interacts with	NR2F1 (interacts with) CHST3	false
123566	interacts with	NR2F1 (interacts with) MAN1C1	false
123567	interacts with	NR2F1 (interacts with) GFPT2	false
123568	interacts with	NR2F1 (interacts with) CHST15	false
123569	interacts with	NR2F1 (interacts with) SULF1	false
123570	interacts with	NR2F1 (interacts with) ST6GALNAC6	false
123571	interacts with	NR2F1 (interacts with) ARSB	false
123572	interacts with	NR2F1 (interacts with) MFNG	false
123573	interacts with	NR2F1 (interacts with) EXTL1	false
123574	interacts with	NR2F1 (interacts with) A4GALT	false
123575	interacts with	NR2F1 (interacts with) GBGT1	false
123576	interacts with	NR2F2 (interacts with) CSGALNACT2	false
123577	interacts with	NR2F2 (interacts with) FUT11	false
123578	interacts with	NR2F2 (interacts with) CSGALNACT1	false
123579	interacts with	NR2F2 (interacts with) DSEL	false
123580	interacts with	NR2F2 (interacts with) CHST3	false
123581	interacts with	NR2F2 (interacts with) CHST7	false
123582	interacts with	NR2F2 (interacts with) ST8SIA1	false
123583	interacts with	NR2F2 (interacts with) GFPT2	false
123584	interacts with	NR2F2 (interacts with) ST6GALNAC5	false
123585	interacts with	NR2F2 (interacts with) ST3GAL3	false
123586	interacts with	NR2F2 (interacts with) SLC35F1	false
123587	interacts with	NR2F6 (interacts with) TSTA3	false
123588	interacts with	NR4A1 (interacts with) HAS1	false
123589	interacts with	PAX5 (interacts with) MFNG	false
123590	interacts with	PBX1 (interacts with) DSEL	false
123591	interacts with	PBX1 (interacts with) MAN1C1	false
123592	interacts with	PBX1 (interacts with) ST3GAL3	false
123593	interacts with	PBX3 (interacts with) DSEL	false
123594	interacts with	PBX3 (interacts with) ARSB	false
123595	interacts with	PBX3 (interacts with) IDS	false
123596	interacts with	PBX3 (interacts with) ST6GALNAC5	false
123597	interacts with	PBX3 (interacts with) CSGALNACT2	false
123598	interacts with	PBX3 (interacts with) SULF1	false
123599	interacts with	PBX3 (interacts with) CHST3	false
123600	interacts with	PBX3 (interacts with) DSE	false
123601	interacts with	PBX3 (interacts with) CHST14	false
123602	interacts with	PCGF1 (interacts with) ALG14	false
123603	interacts with	PDX1 (interacts with) PMM2	false
123604	interacts with	PHF20 (interacts with) POFUT1	false
123605	interacts with	PHF6 (interacts with) ALG6	false
123606	interacts with	PHF8 (interacts with) OGT	false
123607	interacts with	PHF8 (interacts with) STT3B	false
123608	interacts with	PHF8 (interacts with) PIGA	false
123609	interacts with	PML (interacts with) LAMP3	false
123610	interacts with	POLR2B (interacts with) STT3B	false
123611	interacts with	POLR2B (interacts with) MAN2A1	false
123612	interacts with	POLR2B (interacts with) PIGN	false
123613	interacts with	POLR2B (interacts with) B3GALNT2	false
123614	interacts with	POLR2B (interacts with) FKTN	false
123615	interacts with	POLR2B (interacts with) COG6	false
123616	interacts with	POLR2B (interacts with) FPGT	false
123617	interacts with	POLR2B (interacts with) FUT10	false
123618	interacts with	POLR2B (interacts with) PIGG	false
123619	interacts with	POLR3A (interacts with) MGAT5	false
123620	interacts with	POLR3A (interacts with) NEU3	false
123621	interacts with	POLR3A (interacts with) MAN2A1	false
123622	interacts with	POLR3A (interacts with) GANAB	false
123623	interacts with	POLR3A (interacts with) PIGN	false
123624	interacts with	POLR3A (interacts with) MAN2A2	false
123625	interacts with	POLR3A (interacts with) B3GALNT2	false
123626	interacts with	POU2F1 (interacts with) PIGM	false
123627	interacts with	POU2F1 (interacts with) POFUT1	false
123628	interacts with	PPARA (interacts with) GFPT1	false
123629	interacts with	PPARG (interacts with) SLC35A3	false
123630	interacts with	PPARG (interacts with) MGAT4B	false
123631	interacts with	PPARG (interacts with) ACER2	false
123632	interacts with	PPARG (interacts with) UGT1A1	false
123633	interacts with	PRDM1 (interacts with) CHST11	false
123634	interacts with	PRDM1 (interacts with) HS3ST3B1	false
123635	interacts with	PRDM1 (interacts with) HAS2	false
123636	interacts with	PRDM1 (interacts with) GM2A	false
123637	interacts with	PRDM1 (interacts with) CHST2	false
123638	interacts with	PRDM1 (interacts with) HS3ST3A1	false
123639	interacts with	RARA (interacts with) ST3GAL2	false
123640	interacts with	RB1 (interacts with) COG6	false
123641	interacts with	RB1 (interacts with) COG3	false
123642	interacts with	RB1 (interacts with) STT3B	false
123643	interacts with	RB1 (interacts with) COG5	false
123644	interacts with	RBBP5 (interacts with) FAM20B	false
123645	interacts with	RBBP5 (interacts with) UGGT1	false
123646	interacts with	RBBP5 (interacts with) PIGN	false
123647	interacts with	RBBP5 (interacts with) NEU3	false
123648	interacts with	RBBP5 (interacts with) STT3B	false
123649	interacts with	RBBP5 (interacts with) B3GALNT2	false
123650	interacts with	RBBP5 (interacts with) GANAB	false
123651	interacts with	RBBP5 (interacts with) HS2ST1	false
123652	interacts with	RBBP5 (interacts with) GNS	false
123653	interacts with	RBBP5 (interacts with) FKTN	false
123654	interacts with	RBBP5 (interacts with) COG2	false
123655	interacts with	RBBP5 (interacts with) MAN2A1	false
123656	interacts with	RBL2 (interacts with) SLC35A5	false
123657	interacts with	RCOR1 (interacts with) SLC35A3	false
123658	interacts with	RCOR1 (interacts with) GNPNAT1	false
123659	interacts with	RCOR1 (interacts with) GALNT7	false
123660	interacts with	RCOR1 (interacts with) PIGN	false
123661	interacts with	RFX7 (interacts with) NEU3	false
123662	interacts with	RFX7 (interacts with) PIGB	false
123663	interacts with	RUNX1 (interacts with) CHSY1	false
123664	interacts with	RUNX1 (interacts with) SULF1	false
123665	interacts with	RUNX3 (interacts with) CHST11	false
123666	interacts with	SETDB1 (interacts with) OGT	false
123667	interacts with	SETDB1 (interacts with) PIGM	false
123668	interacts with	SETDB1 (interacts with) COG2	false
123669	interacts with	SETDB1 (interacts with) POFUT1	false
123670	interacts with	SFMBT1 (interacts with) STT3B	false
123671	interacts with	SIN3A (interacts with) MAN2A2	false
123672	interacts with	SIRT6 (interacts with) DPM2	false
123673	interacts with	SIRT6 (interacts with) B3GAT3	false
123674	interacts with	SIX5 (interacts with) CHST12	false
123675	interacts with	SMARCB1 (interacts with) B3GAT3	false
123676	interacts with	SMARCC1 (interacts with) ALG10	false
123677	interacts with	SMARCC1 (interacts with) HS2ST1	false
123678	interacts with	SMARCC1 (interacts with) B3GALNT2	false
123679	interacts with	SMC1A (interacts with) STT3B	false
123680	interacts with	SMC1A (interacts with) ALG6	false
123681	interacts with	SMC3 (interacts with) RTF1	false
123682	interacts with	SMC3 (interacts with) COG3	false
123683	interacts with	SMC3 (interacts with) OGT	false
123684	interacts with	SNAI2 (interacts with) HAS2	false
123685	interacts with	SNAI2 (interacts with) CHSY3	false
123686	interacts with	SNAI2 (interacts with) CHST1	false
123687	interacts with	SNAI2 (interacts with) CSGALNACT2	false
123688	interacts with	SNAI2 (interacts with) GFPT2	false
123689	interacts with	SNAI2 (interacts with) SULF1	false
123690	interacts with	SNAI2 (interacts with) DSEL	false
123691	interacts with	SNAI2 (interacts with) ST6GAL2	false
123692	interacts with	SNAI2 (interacts with) ST6GALNAC5	false
123693	interacts with	SNAI2 (interacts with) ST8SIA4	false
123694	interacts with	SNAI2 (interacts with) GAL3ST4	false
123695	interacts with	SPIB (interacts with) MFNG	false
123696	interacts with	SPIB (interacts with) ST8SIA1	false
123697	interacts with	SPIB (interacts with) ST3GAL5	false
123698	interacts with	SRC (interacts with) SLC35C2	false
123699	interacts with	SRC (interacts with) POFUT1	false
123700	interacts with	SRC (interacts with) SLC35A2	false
123701	interacts with	SRC (interacts with) CTSA	false
123702	interacts with	SRCAP (interacts with) COG7	false
123703	interacts with	SRCAP (interacts with) PIGG	false
123704	interacts with	STAT1 (interacts with) LAMP3	false
123705	interacts with	STAT1 (interacts with) HK3	false
123706	interacts with	STAT2 (interacts with) LAMP3	false
123707	interacts with	STAT2 (interacts with) GNS	false
123708	interacts with	STAT2 (interacts with) HK3	false
123709	interacts with	STAT2 (interacts with) DSE	false
123710	interacts with	STAT2 (interacts with) ST8SIA4	false
123711	interacts with	STAT2 (interacts with) CSGALNACT2	false
123712	interacts with	STAT2 (interacts with) ST3GAL5	false
123713	interacts with	STAT2 (interacts with) CHST11	false
123714	interacts with	STAT2 (interacts with) GM2A	false
123715	interacts with	STAT2 (interacts with) ARSB	false
123716	interacts with	STAT2 (interacts with) ST8SIA1	false
123717	interacts with	STAT3 (interacts with) UGCG	false
123718	interacts with	STAT4 (interacts with) FUT7	false
123719	interacts with	STAT4 (interacts with) ST8SIA4	false
123720	interacts with	STAT4 (interacts with) GM2A	false
123721	interacts with	STAT4 (interacts with) ST8SIA1	false
123722	interacts with	STAT4 (interacts with) NPL	false
123723	interacts with	STAT4 (interacts with) CHST11	false
123724	interacts with	STAT4 (interacts with) NAGK	false
123725	interacts with	STAT4 (interacts with) ARSB	false
123726	interacts with	STAT4 (interacts with) GAL3ST4	false
123727	interacts with	STAT4 (interacts with) CSGALNACT2	false
123728	interacts with	STAT4 (interacts with) CHST2	false
123729	interacts with	STAT4 (interacts with) HS3ST3B1	false
123730	interacts with	STAT5A (interacts with) GM2A	false
123731	interacts with	STAT5A (interacts with) ST8SIA4	false
123732	interacts with	STAT5B (interacts with) CSGALNACT2	false
123733	interacts with	STAT5B (interacts with) MAN1A1	false
123734	interacts with	STAT5B (interacts with) NDST1	false
123735	interacts with	STAT5B (interacts with) ARSB	false
123736	interacts with	STAT5B (interacts with) ST8SIA1	false
123737	interacts with	STAT5B (interacts with) ST3GAL2	false
123738	interacts with	STAT5B (interacts with) SLC35B4	false
123739	interacts with	STAT5B (interacts with) ST8SIA4	false
123740	interacts with	STAT5B (interacts with) CHST3	false
123741	interacts with	STAT5B (interacts with) CHST15	false
123742	interacts with	STAT5B (interacts with) ST6GALNAC6	false
123743	interacts with	STAT5B (interacts with) ST3GAL3	false
123744	interacts with	SUMO2 (interacts with) DPM1	false
123745	interacts with	SUMO2 (interacts with) DAD1	false
123746	interacts with	TAF1 (interacts with) NEU3	false
123747	interacts with	TAF1 (interacts with) MAN1A2	false
123748	interacts with	TAF1 (interacts with) OGT	false
123749	interacts with	TAF1 (interacts with) FKTN	false
123750	interacts with	TAF1 (interacts with) LAMP2	false
123751	interacts with	TAF1 (interacts with) HS2ST1	false
123752	interacts with	TBL1XR1 (interacts with) ALG10	false
123753	interacts with	TBL1XR1 (interacts with) ALG10B	false
123754	interacts with	TBL1XR1 (interacts with) HS2ST1	false
123755	interacts with	TBL1XR1 (interacts with) SLC35A3	false
123756	interacts with	TBL1XR1 (interacts with) FPGT	false
123757	interacts with	TBL1XR1 (interacts with) COG3	false
123758	interacts with	TBL1XR1 (interacts with) UGGT2	false
123759	interacts with	TBL1XR1 (interacts with) OGT	false
123760	interacts with	TBL1XR1 (interacts with) B3GALNT2	false
123761	interacts with	TCF12 (interacts with) GLCE	false
123762	interacts with	TCF21 (interacts with) MFNG	false
123763	interacts with	TCF21 (interacts with) MAN1C1	false
123764	interacts with	TCF21 (interacts with) ST6GALNAC6	false
123765	interacts with	TCF21 (interacts with) GFPT2	false
123766	interacts with	TCF21 (interacts with) CHST3	false
123767	interacts with	TCF21 (interacts with) TPST1	false
123768	interacts with	TCF21 (interacts with) CHST7	false
123769	interacts with	TCF21 (interacts with) GAL3ST4	false
123770	interacts with	TCF21 (interacts with) B3GNT9	false
123771	interacts with	TCF21 (interacts with) CSGALNACT2	false
123772	interacts with	TCF21 (interacts with) CSGALNACT1	false
123773	interacts with	TCF21 (interacts with) ST3GAL3	false
123774	interacts with	TCF21 (interacts with) EXTL1	false
123775	interacts with	TCF21 (interacts with) A4GALT	false
123776	interacts with	TCF21 (interacts with) ST3GAL5	false
123777	interacts with	TCF21 (interacts with) HAS1	false
123778	interacts with	TCF7L1 (interacts with) TPST1	false
123779	interacts with	TCF7L1 (interacts with) CHST14	false
123780	interacts with	TCF7L1 (interacts with) CHST3	false
123781	interacts with	TCF7L1 (interacts with) ST6GALNAC3	false
123782	interacts with	TCF7L1 (interacts with) GFPT2	false
123783	interacts with	TCF7L1 (interacts with) NDST1	false
123784	interacts with	TCF7L1 (interacts with) CHST1	false
123785	interacts with	TCF7L1 (interacts with) A4GALT	false
123786	interacts with	TCF7L1 (interacts with) CHST15	false
123787	interacts with	TCF7L1 (interacts with) GBGT1	false
123788	interacts with	TCF7L1 (interacts with) ST3GAL3	false
123789	interacts with	TCF7L1 (interacts with) ST3GAL4	false
123790	interacts with	TCF7L1 (interacts with) CHST12	false
123791	interacts with	TCF7L1 (interacts with) MAN1C1	false
123792	interacts with	TCF7L1 (interacts with) EXTL1	false
123793	interacts with	TCF7L1 (interacts with) ARSB	false
123794	interacts with	TCF7L1 (interacts with) HAS1	false
123795	interacts with	TDRD3 (interacts with) COG6	false
123796	interacts with	TEAD1 (interacts with) CSGALNACT2	false
123797	interacts with	TEAD1 (interacts with) FAM20B	false
123798	interacts with	TEAD1 (interacts with) CHST15	false
123799	interacts with	TEAD1 (interacts with) ARSB	false
123800	interacts with	TEAD1 (interacts with) DSEL	false
123801	interacts with	TET2 (interacts with) MAN1A2	false
123802	interacts with	TET2 (interacts with) STT3B	false
123803	interacts with	TET2 (interacts with) PIGN	false
123804	interacts with	TET2 (interacts with) OGT	false
123805	interacts with	TET2 (interacts with) GALNT7	false
123806	interacts with	THAP11 (interacts with) COG8	false
123807	interacts with	TRIM28 (interacts with) GPI	false
123808	interacts with	TRIM28 (interacts with) GANAB	false
123809	interacts with	TRIM28 (interacts with) DDOST	false
123810	interacts with	TTF1 (interacts with) OGT	false
123811	interacts with	TTF2 (interacts with) PIGW	false
123812	interacts with	TTF2 (interacts with) ALG6	false
123813	interacts with	TTF2 (interacts with) PIGN	false
123814	interacts with	TTF2 (interacts with) FPGT	false
123815	interacts with	TTF2 (interacts with) GNPNAT1	false
123816	interacts with	TTF2 (interacts with) HS2ST1	false
123817	interacts with	TTF2 (interacts with) FUT10	false
123818	interacts with	UBE2I (interacts with) DAD1	false
123819	interacts with	VDR (interacts with) SLC35A3	false
123820	interacts with	WDR5 (interacts with) DPM2	false
123821	interacts with	WDR5 (interacts with) MAN1B1	false
123822	interacts with	WDR5 (interacts with) PIGW	false
123823	interacts with	XBP1 (interacts with) GMPPB	false
123824	interacts with	XRN2 (interacts with) STT3B	false
123825	interacts with	XRN2 (interacts with) NEU3	false
123826	interacts with	XRN2 (interacts with) COG5	false
123827	interacts with	XRN2 (interacts with) POFUT1	false
123828	interacts with	XRN2 (interacts with) HS2ST1	false
123829	interacts with	XRN2 (interacts with) ALG10	false
123830	interacts with	XRN2 (interacts with) FKTN	false
123831	interacts with	XRN2 (interacts with) COG3	false
123832	interacts with	YY1 (interacts with) PIGW	false
123833	interacts with	ZBTB33 (interacts with) FKTN	false
123834	interacts with	ZBTB33 (interacts with) C1GALT1C1	false
123835	interacts with	ZBTB33 (interacts with) OGT	false
123836	interacts with	ZBTB33 (interacts with) PIGA	false
123837	interacts with	ZBTB33 (interacts with) GLCE	false
123838	interacts with	ZBTB33 (interacts with) HS2ST1	false
