# Supplementary material for: A systems-based framework to computationally describe putative transcription factors and signaling pathways regulating glycan biosynthesis
Source: publisher site journal article supplement (doi:10.3762/bjoc.17.119), 2021-07-22
Supplement: Additional file 2 [file 1860-5397-17-119-S2.cys › CytoscapeSession-2021_03_21-12_01/tables/123032-STES/LOCAL_ATTRS-org.cytoscape.model.CyNode-STES+default+node.cytable]

CyCSV-Version	1
SUID	name	nodeType	selected
java.lang.Long	java.lang.String	java.lang.String	java.lang.Boolean
		mutable
STES default node
105684	ADNP	TF	false
105685	FUT7	Glycogene	false
105686	AFF4	TF	false
105687	MAN1A2	Glycogene	false
105694	MAN2A1	Glycogene	false
105985	UGCG	Glycogene	false
106836	AHR	TF	false
106027	GALNT5	Glycogene	false
107970	ARID3A	TF	false
105792	POFUT1	Glycogene	false
106837	ASCL2	TF	false
105800	KHK	Glycogene	false
105704	ATF2	TF	false
105689	NEU3	Glycogene	false
105705	UGGT1	Glycogene	false
105688	STT3B	Glycogene	false
105702	SLC35A5	Glycogene	false
105711	ALG10	Glycogene	false
105905	GNS	Glycogene	false
105716	MAN1A1	Glycogene	false
105714	BACH1	TF	false
105715	CSGALNACT2	Glycogene	false
105723	BATF3	TF	false
105859	HK3	Glycogene	false
105724	MGAT1	Glycogene	false
105834	ST8SIA4	Glycogene	false
105718	CHST11	Glycogene	false
107275	BCL6	TF	false
106861	CHST15	Glycogene	false
105746	ST6GALNAC6	Glycogene	false
105747	ST3GAL3	Glycogene	false
105843	ARSB	Glycogene	false
105719	GFPT2	Glycogene	false
105857	DSEL	Glycogene	false
105768	A4GALT	Glycogene	false
106887	EXTL1	Glycogene	false
105807	CHST3	Glycogene	false
107989	ST6GALNAC5	Glycogene	false
105720	ST6GAL2	Glycogene	false
105927	SLC35F1	Glycogene	false
110788	BCOR	TF	false
105748	MAN2A2	Glycogene	false
105728	BRCA1	TF	false
105729	PIGW	Glycogene	false
105874	PIGO	Glycogene	false
105973	COG2	Glycogene	false
108027	PIGA	Glycogene	false
105733	BRD1	TF	false
105734	ALG12	Glycogene	false
105736	C17orf49	TF	false
105754	B3GAT3	Glycogene	false
106845	CBFA2T3	TF	false
105739	CBFB	TF	false
107979	SLC35F2	Glycogene	false
105741	CBX3	TF	false
105799	DPM1	Glycogene	false
106012	ALG5	Glycogene	false
107286	ALG8	Glycogene	false
108557	PIGF	Glycogene	false
106847	CBX6	TF	false
105806	ST3GAL2	Glycogene	false
105745	CBX7	TF	false
106853	MAN1C1	Glycogene	false
105766	MFNG	Glycogene	false
105840	ST8SIA1	Glycogene	false
108011	CHST8	Glycogene	false
105835	CHST7	Glycogene	false
106854	XYLT1	Glycogene	false
105752	CBX8	TF	false
105753	GALK1	Glycogene	false
108555	DDOST	Glycogene	false
106848	CDK12	TF	false
105998	GANAB	Glycogene	false
105756	CDK8	TF	false
105823	COG3	Glycogene	false
105908	B3GALNT2	Glycogene	false
107982	CDX2	TF	false
107983	B3GNT8	Glycogene	false
108612	CHST5	Glycogene	false
106860	MGAT4A	Glycogene	false
123042	GALNT8	Glycogene	false
105764	CEBPA	TF	false
105767	CEBPB	TF	false
105763	CHST12	Glycogene	false
108018	CHST14	Glycogene	false
105912	RENBP	Glycogene	false
105781	B3GALT6	Glycogene	false
105769	CHD1	TF	false
105771	OGT	Glycogene	false
105770	CHD2	TF	false
105774	CHD8	TF	false
105775	CIITA	TF	false
105776	LAMP3	Glycogene	false
105883	GM2A	Glycogene	false
105780	CPSF3L	TF	false
105790	CREBBP	TF	false
105772	NDST2	Glycogene	false
108568	CSNK2A1	TF	false
106893	STT3A	Glycogene	false
105793	CTBP1	TF	false
105782	B4GALT7	Glycogene	false
105794	CTNNB1	TF	false
105851	GLCE	Glycogene	false
105795	DEK	TF	false
107281	SLC35B3	Glycogene	false
105796	E2F1	TF	false
105797	ALG3	Glycogene	false
105798	SLC35B1	Glycogene	false
105758	DPM2	Glycogene	false
107986	SLC35C2	Glycogene	false
105936	RPN1	Glycogene	false
105854	RPN2	Glycogene	false
105762	MOGS	Glycogene	false
105789	B4GALT3	Glycogene	false
105881	GPAA1	Glycogene	false
107284	E2F3	TF	false
105801	E2F6	TF	false
105803	E2F7	TF	false
106879	ALG6	Glycogene	false
108575	E2F8	TF	false
105804	EBF1	TF	false
105805	CSGALNACT1	Glycogene	false
105897	GBGT1	Glycogene	false
105811	ST3GAL6	Glycogene	false
106857	ST3GAL5	Glycogene	false
107285	EED	TF	false
105816	EGR2	TF	false
106883	SULF1	Glycogene	false
105833	CHSY3	Glycogene	false
105841	HS3ST3B1	Glycogene	false
105778	GAL3ST4	Glycogene	false
105765	NAGK	Glycogene	false
105708	HAS1	Glycogene	false
105690	FUT11	Glycogene	false
105819	EHF	TF	false
105695	SLC35A3	Glycogene	false
105821	EHMT2	TF	false
105822	ELF1	TF	false
105824	COG6	Glycogene	false
105826	ELK3	TF	false
105827	ELK4	TF	false
105731	FAM20B	Glycogene	false
105829	EP400	TF	false
108023	POMT2	Glycogene	false
105830	ERCC6	TF	false
105832	ERG	TF	false
105815	ST6GALNAC3	Glycogene	false
105923	NDST1	Glycogene	false
109673	SMPD1	Glycogene	false
110794	ESRRA	TF	false
105880	TSTA3	Glycogene	false
108559	GALE	Glycogene	false
112223	B3GNT3	Glycogene	false
108556	PMM2	Glycogene	false
105918	MGAT4B	Glycogene	false
105839	ETS1	TF	false
105838	CHST2	Glycogene	false
108010	CHST1	Glycogene	false
105842	ETV1	TF	false
108582	EZH2	TF	false
105847	FANCD2	TF	false
105848	FLI1	TF	false
107295	FOSL2	TF	false
116606	FOXA2	TF	false
107988	FOXD2	TF	false
107984	CTSA	Glycogene	false
107298	FOXK1	TF	false
107299	EXTL3	Glycogene	false
105853	FOXM1	TF	false
106864	GPI	Glycogene	false
105856	FOXO1	TF	false
105709	HAS2	Glycogene	false
105858	FOXP3	TF	false
105884	LIPA	Glycogene	false
105860	NPL	Glycogene	false
105861	GABPA	TF	false
106863	GAPDH	TF	false
109677	GATA3	TF	false
105862	GATA6	TF	false
105810	FUT4	Glycogene	false
107991	GLI1	TF	false
105865	GLI2	TF	false
105866	GLYR1	TF	false
105867	ALG1	Glycogene	false
108589	GMEB2	TF	false
106865	GPS2	TF	false
108008	DAD1	Glycogene	false
106866	GRHL1	TF	false
105707	B3GNT5	Glycogene	false
105868	GTF2B	TF	false
105871	GTF2I	TF	false
105692	COG5	Glycogene	false
105893	MGAT5	Glycogene	false
107302	GTF3C2	TF	false
105872	H2AFX	TF	false
105878	DPAGT1	Glycogene	false
105873	HCFC1	TF	false
107303	HDAC1	TF	false
108592	HDAC2	TF	false
105875	HECTD1	TF	false
107993	HEYL	TF	false
106867	HIF1A	TF	false
105717	CHSY1	Glycogene	false
123043	HMGN1	TF	false
107994	HNF1B	TF	false
112227	B4GALT4	Glycogene	false
107995	HNF4A	TF	false
107279	B4GALT5	Glycogene	false
105950	SLC35D1	Glycogene	false
107300	ALG11	Glycogene	false
118331	HNF4G	TF	false
114936	SULT1B1	Glycogene	false
110806	GALK2	Glycogene	false
108005	SLC17A5	Glycogene	false
108552	GCNT1	Glycogene	false
118332	HOXA13	TF	false
108003	GCNT3	Glycogene	false
118333	HOXA4	TF	false
105879	HSF1	TF	false
105744	RFNG	Glycogene	false
105917	B4GALT2	Glycogene	false
105882	IKZF1	TF	false
105777	MAN2B1	Glycogene	false
105779	DSE	Glycogene	false
105887	IRF1	TF	false
105888	IRF4	TF	false
118334	ISL1	TF	false
105892	JMJD1C	TF	false
105922	IDS	Glycogene	false
105901	KDM1A	TF	false
105903	KDM3A	TF	false
106874	KDM4A	TF	false
107317	KLF4	TF	false
105691	ACER2	Glycogene	false
107999	B3GNT6	Glycogene	false
105920	ST6GALNAC1	Glycogene	false
108015	B4GALNT3	Glycogene	false
107318	KLF5	TF	false
106882	GFPT1	Glycogene	false
107320	LDB1	TF	false
106875	LEF1	TF	false
108033	HS3ST3A1	Glycogene	false
108013	CHST10	Glycogene	false
105837	SULT1C4	Glycogene	false
108014	MGAT5B	Glycogene	false
105909	LMO2	TF	false
105911	LYL1	TF	false
106876	MAF	TF	false
107990	B4GALNT1	Glycogene	false
105914	MAFB	TF	false
105916	MAZ	TF	false
105759	PIGQ	Glycogene	false
105919	MECOM	TF	false
106859	GALNT7	Glycogene	false
105921	MECP2	TF	false
107324	MED12	TF	false
105925	MEF2A	TF	false
106877	MEF2B	TF	false
105926	MEF2C	TF	false
107325	MEF2D	TF	false
105928	MEIS1	TF	false
105844	EXTL2	Glycogene	false
106878	MEIS3	TF	false
105931	MRE11A	TF	false
105933	MXD3	TF	false
113228	MYB	TF	false
105935	MYBL2	TF	false
105937	MYH11	TF	false
108603	NCOR1	TF	false
108578	PIGL	Glycogene	false
105945	NFIC	TF	false
105947	NIPBL	TF	false
105713	FKTN	Glycogene	false
105949	NR2C2	TF	false
105951	NR2F1	TF	false
108017	NR2F2	TF	false
117859	NR2F6	TF	false
111109	NR4A1	TF	false
113230	PAX5	TF	false
105953	PBX1	TF	false
113231	PBX3	TF	false
105955	PCGF1	TF	false
107992	ALG14	Glycogene	false
108019	PDX1	TF	false
105956	PHF20	TF	false
105957	PHF6	TF	false
107334	PHF8	TF	false
107336	PML	TF	false
105959	POLR2B	TF	false
105730	PIGN	Glycogene	false
105976	FPGT	Glycogene	false
107278	FUT10	Glycogene	false
109689	PIGG	Glycogene	false
105960	POLR3A	TF	false
118043	POU2F1	TF	false
105954	PIGM	Glycogene	false
106881	PPARA	TF	false
105961	PPARG	TF	false
116602	UGT1A1	Glycogene	false
105962	PRDM1	TF	false
106884	RARA	TF	false
105965	RB1	TF	false
105967	RBBP5	TF	false
105906	HS2ST1	Glycogene	false
105968	RBL2	TF	false
105969	RCOR1	TF	false
105855	GNPNAT1	Glycogene	false
105974	RFX7	TF	false
108020	PIGB	Glycogene	false
105978	RUNX1	TF	false
105982	RUNX3	TF	false
107339	SETDB1	TF	false
108615	SFMBT1	TF	false
105984	SIN3A	TF	false
106885	SIRT6	TF	false
105986	SIX5	TF	false
108617	SMARCB1	TF	false
107344	SMARCC1	TF	false
105989	SMC1A	TF	false
105990	SMC3	TF	false
105700	RTF1	Glycogene	false
109686	SNAI2	TF	false
106888	SPIB	TF	false
108028	SRC	TF	false
107335	SLC35A2	Glycogene	false
105994	SRCAP	TF	false
105791	COG7	Glycogene	false
105999	STAT1	TF	false
106001	STAT2	TF	false
107347	STAT3	TF	false
106002	STAT4	TF	false
106003	STAT5A	TF	false
108029	STAT5B	TF	false
105845	SLC35B4	Glycogene	false
106004	SUMO2	TF	false
106006	TAF1	TF	false
107350	LAMP2	Glycogene	false
111114	TBL1XR1	TF	false
105727	ALG10B	Glycogene	false
105966	UGGT2	Glycogene	false
106007	TCF12	TF	false
108031	TCF21	TF	false
105809	TPST1	Glycogene	false
108032	B3GNT9	Glycogene	false
106009	TCF7L1	TF	false
107998	ST3GAL4	Glycogene	false
106011	TDRD3	TF	false
106013	TEAD1	TF	false
106016	TET2	TF	false
106890	THAP11	TF	false
106891	COG8	Glycogene	false
106018	TRIM28	TF	false
111116	TTF1	TF	false
106019	TTF2	TF	false
108629	UBE2I	TF	false
107356	VDR	TF	false
106024	WDR5	TF	false
105760	MAN1B1	Glycogene	false
108037	XBP1	TF	false
108038	GMPPB	Glycogene	false
106025	XRN2	TF	false
106028	YY1	TF	false
106031	ZBTB33	TF	false
106032	C1GALT1C1	Glycogene	false
