# Supplementary material for: A systems-based framework to computationally describe putative transcription factors and signaling pathways regulating glycan biosynthesis
Source: publisher site journal article supplement (doi:10.3762/bjoc.17.119), 2021-07-22
Supplement: Additional file 2 [file 1860-5397-17-119-S2.cys › CytoscapeSession-2021_03_21-12_01/tables/123839-TGCT/LOCAL_ATTRS-org.cytoscape.model.CyEdge-TGCT+default+edge.cytable]

CyCSV-Version	1
SUID	interaction	name	selected
java.lang.Long	java.lang.String	java.lang.String	java.lang.Boolean
TGCT default edge
123856	interacts with	ADNP (interacts with) FUT7	false
123857	interacts with	AEBP2 (interacts with) DPM1	false
123858	interacts with	AEBP2 (interacts with) UGP2	false
123859	interacts with	ARID2 (interacts with) COG6	false
123860	interacts with	ARID3A (interacts with) UGDH	false
123861	interacts with	ARID3A (interacts with) DSEL	false
123862	interacts with	ARID3A (interacts with) HAS2	false
123863	interacts with	ARID3A (interacts with) GCNT2	false
123864	interacts with	ASCL2 (interacts with) GM2A	false
123865	interacts with	ASCL2 (interacts with) CTSA	false
123866	interacts with	ASCL2 (interacts with) B3GAT3	false
123867	interacts with	ATF2 (interacts with) MAN1A2	false
123868	interacts with	ATF2 (interacts with) MAN2A1	false
123869	interacts with	ATF2 (interacts with) FUT11	false
123870	interacts with	ATF2 (interacts with) ACER2	false
123871	interacts with	ATF2 (interacts with) NEU3	false
123872	interacts with	ATF2 (interacts with) UGGT1	false
123873	interacts with	ATF2 (interacts with) STT3B	false
123874	interacts with	ATF2 (interacts with) COG5	false
123875	interacts with	ATF2 (interacts with) COG6	false
123876	interacts with	ATF2 (interacts with) FAM20B	false
123877	interacts with	ATF2 (interacts with) SLC35A5	false
123878	interacts with	ATF2 (interacts with) SLC35E1	false
123879	interacts with	ATF2 (interacts with) GNE	false
123880	interacts with	ATF2 (interacts with) COG8	false
123881	interacts with	ATF2 (interacts with) B3GALNT2	false
123882	interacts with	ATF2 (interacts with) SLC35A2	false
123883	interacts with	ATF4 (interacts with) RFNG	false
123884	interacts with	ATF4 (interacts with) DPM2	false
123885	interacts with	ATF5 (interacts with) MAN2B1	false
123886	interacts with	ATF5 (interacts with) MGAT1	false
123887	interacts with	ATF5 (interacts with) ST8SIA1	false
123888	interacts with	ATF7IP (interacts with) ALG10	false
123889	interacts with	ATF7IP (interacts with) FUT10	false
123890	interacts with	ATRX (interacts with) SLC35A3	false
123891	interacts with	ATRX (interacts with) COG3	false
123892	interacts with	ATRX (interacts with) FUT10	false
123893	interacts with	AUTS2 (interacts with) POFUT2	false
123894	interacts with	BACH2 (interacts with) COG6	false
123895	interacts with	BATF (interacts with) FUT7	false
123896	interacts with	BATF (interacts with) NAGK	false
123897	interacts with	BATF (interacts with) FUCA1	false
123898	interacts with	BATF (interacts with) LAMP3	false
123899	interacts with	BATF (interacts with) MGAT1	false
123900	interacts with	BATF (interacts with) ST3GAL5	false
123901	interacts with	BATF (interacts with) ST8SIA4	false
123902	interacts with	BATF (interacts with) NAAA	false
123903	interacts with	BATF (interacts with) CTSA	false
123904	interacts with	BATF (interacts with) GM2A	false
123905	interacts with	BATF (interacts with) LIPA	false
123906	interacts with	BCAT1 (interacts with) STT3A	false
123907	interacts with	BCAT1 (interacts with) B3GNT5	false
123908	interacts with	BCAT1 (interacts with) GMDS	false
123909	interacts with	BCOR (interacts with) COG8	false
123910	interacts with	BMI1 (interacts with) FAM20B	false
123911	interacts with	BMI1 (interacts with) CSGALNACT2	false
123912	interacts with	BMI1 (interacts with) STT3B	false
123913	interacts with	BMI1 (interacts with) COG5	false
123914	interacts with	BMI1 (interacts with) GALNT1	false
123915	interacts with	BMI1 (interacts with) SLC35B4	false
123916	interacts with	BMI1 (interacts with) B3GALNT2	false
123917	interacts with	BMI1 (interacts with) GNE	false
123918	interacts with	BMI1 (interacts with) MGAT2	false
123919	interacts with	BMI1 (interacts with) B3GAT2	false
123920	interacts with	BMI1 (interacts with) GCNT1	false
123921	interacts with	BMI1 (interacts with) FUT4	false
123922	interacts with	BMI1 (interacts with) PIGP	false
123923	interacts with	BRD1 (interacts with) OGT	false
123924	interacts with	BRD1 (interacts with) ACER2	false
123925	interacts with	BRD1 (interacts with) STT3B	false
123926	interacts with	BRD1 (interacts with) FAM20B	false
123927	interacts with	BRD1 (interacts with) SLC35A5	false
123928	interacts with	BRD1 (interacts with) SLC35E1	false
123929	interacts with	BRD1 (interacts with) MAN1A2	false
123930	interacts with	BRD1 (interacts with) MGAT3	false
123931	interacts with	BRD1 (interacts with) SLC35B4	false
123932	interacts with	BRD1 (interacts with) SLC35A2	false
123933	interacts with	BRD1 (interacts with) COG5	false
123934	interacts with	BRD2 (interacts with) STT3B	false
123935	interacts with	BRD2 (interacts with) FUT11	false
123936	interacts with	BRD2 (interacts with) COG5	false
123937	interacts with	BRD2 (interacts with) MAN1A2	false
123938	interacts with	BRD2 (interacts with) SLC35A5	false
123939	interacts with	BRD2 (interacts with) ACER2	false
123940	interacts with	BRD2 (interacts with) COG8	false
123941	interacts with	BRD2 (interacts with) SLC35B4	false
123942	interacts with	BRD2 (interacts with) MGAT3	false
123943	interacts with	BRD3 (interacts with) STT3B	false
123944	interacts with	BRD4 (interacts with) SLC35E1	false
123945	interacts with	BRD4 (interacts with) STT3B	false
123946	interacts with	BRD4 (interacts with) UGCG	false
123947	interacts with	BRD4 (interacts with) MAN1A2	false
123948	interacts with	BRD4 (interacts with) NEU3	false
123949	interacts with	BRD4 (interacts with) COG8	false
123950	interacts with	BRD4 (interacts with) B3GALNT2	false
123951	interacts with	BRD4 (interacts with) UGGT1	false
123952	interacts with	BRD4 (interacts with) ACER2	false
123953	interacts with	BRD4 (interacts with) SLC35A5	false
123954	interacts with	BRD4 (interacts with) SLC35E3	false
123955	interacts with	BRD4 (interacts with) SLC35A2	false
123956	interacts with	BTAF1 (interacts with) SLC35A1	false
123957	interacts with	C17orf49 (interacts with) B3GAT3	false
123958	interacts with	C17orf49 (interacts with) B3GALT4	false
123959	interacts with	CAMTA2 (interacts with) SGSH	false
123960	interacts with	CASP8AP2 (interacts with) SLC35A5	false
123961	interacts with	CASP8AP2 (interacts with) SLC35B4	false
123962	interacts with	CBX2 (interacts with) COG5	false
123963	interacts with	CBX2 (interacts with) ST6GALNAC1	false
123964	interacts with	CBX2 (interacts with) SLC35B2	false
123965	interacts with	CBX3 (interacts with) SLC35A1	false
123966	interacts with	CBX3 (interacts with) PIGP	false
123967	interacts with	CBX3 (interacts with) SLC35A5	false
123968	interacts with	CBX3 (interacts with) OGT	false
123969	interacts with	CCNT2 (interacts with) FAM20B	false
123970	interacts with	CDK12 (interacts with) PIGO	false
123971	interacts with	CDK12 (interacts with) GANAB	false
123972	interacts with	CDK12 (interacts with) ACER2	false
123973	interacts with	CDK8 (interacts with) STT3B	false
123974	interacts with	CDK8 (interacts with) NEU3	false
123975	interacts with	CDK8 (interacts with) MAN1A2	false
123976	interacts with	CDK8 (interacts with) UGGT1	false
123977	interacts with	CDK8 (interacts with) SLC35F5	false
123978	interacts with	CEBPA (interacts with) MGAT1	false
123979	interacts with	CEBPA (interacts with) GM2A	false
123980	interacts with	CEBPA (interacts with) FUCA1	false
123981	interacts with	CEBPA (interacts with) HK3	false
123982	interacts with	CEBPA (interacts with) NPL	false
123983	interacts with	CEBPA (interacts with) LIPA	false
123984	interacts with	CEBPA (interacts with) HEXA	false
123985	interacts with	CEBPA (interacts with) CTSA	false
123986	interacts with	CEBPA (interacts with) ST6GALNAC2	false
123987	interacts with	CEBPA (interacts with) SGSH	false
123988	interacts with	CEBPA (interacts with) NAAA	false
123989	interacts with	CEBPA (interacts with) GNS	false
123990	interacts with	CEBPG (interacts with) SLC35B4	false
123991	interacts with	CEBPG (interacts with) OGT	false
123992	interacts with	CHD1 (interacts with) OGT	false
123993	interacts with	CHD1 (interacts with) STT3B	false
123994	interacts with	CHD1 (interacts with) ALG13	false
123995	interacts with	CHD1 (interacts with) COG5	false
123996	interacts with	CHD1 (interacts with) MAN1A2	false
123997	interacts with	CHD1 (interacts with) COG6	false
123998	interacts with	CHD1 (interacts with) B3GALNT2	false
123999	interacts with	CHD1 (interacts with) SLC35B4	false
124000	interacts with	CHD1 (interacts with) SLC35A1	false
124001	interacts with	CHD2 (interacts with) MAN1A2	false
124002	interacts with	CHD2 (interacts with) OGT	false
124003	interacts with	CHD2 (interacts with) NDST2	false
124004	interacts with	CHD2 (interacts with) FKTN	false
124005	interacts with	CHD2 (interacts with) STT3B	false
124006	interacts with	CHD2 (interacts with) SLC35E1	false
124007	interacts with	CHD2 (interacts with) COG6	false
124008	interacts with	CHD2 (interacts with) GLCE	false
124009	interacts with	CHD2 (interacts with) FPGT	false
124010	interacts with	CHD2 (interacts with) ST3GAL2	false
124011	interacts with	CHD2 (interacts with) GNE	false
124012	interacts with	CHD2 (interacts with) SLC35B4	false
124013	interacts with	CHD2 (interacts with) FUT8	false
124014	interacts with	CHD2 (interacts with) SLC35A1	false
124015	interacts with	CHD4 (interacts with) NEU3	false
124016	interacts with	CHD4 (interacts with) GANAB	false
124017	interacts with	CHD8 (interacts with) NEU3	false
124018	interacts with	CHD8 (interacts with) STT3B	false
124019	interacts with	CHD8 (interacts with) FUT11	false
124020	interacts with	CHD8 (interacts with) COG5	false
124021	interacts with	CHD8 (interacts with) ACER2	false
124022	interacts with	CHD8 (interacts with) COG8	false
124023	interacts with	CHD8 (interacts with) B4GALT5	false
124024	interacts with	CHD8 (interacts with) FUT8	false
124025	interacts with	CHD8 (interacts with) COG6	false
124026	interacts with	CHD8 (interacts with) PIGN	false
124027	interacts with	CHD8 (interacts with) MAN1A2	false
124028	interacts with	CHD8 (interacts with) SLC35E1	false
124029	interacts with	CHD8 (interacts with) GNE	false
124030	interacts with	CHD8 (interacts with) ALG13	false
124031	interacts with	CHD8 (interacts with) B3GALNT2	false
124032	interacts with	CIITA (interacts with) FUT7	false
124033	interacts with	CIITA (interacts with) LAMP3	false
124034	interacts with	CIITA (interacts with) MAN2B1	false
124035	interacts with	CIITA (interacts with) FUCA1	false
124036	interacts with	CREB1 (interacts with) SLC35A2	false
124037	interacts with	CREBBP (interacts with) FUT11	false
124038	interacts with	CREBBP (interacts with) MAN1A2	false
124039	interacts with	CREBBP (interacts with) NEU3	false
124040	interacts with	CREBBP (interacts with) ACER2	false
124041	interacts with	CREBBP (interacts with) STT3B	false
124042	interacts with	CREBBP (interacts with) FUT10	false
124043	interacts with	CREBBP (interacts with) SLC35E1	false
124044	interacts with	CREBBP (interacts with) PIGN	false
124045	interacts with	CREBBP (interacts with) COG8	false
124046	interacts with	CREBBP (interacts with) UGCG	false
124047	interacts with	CREBBP (interacts with) UGGT1	false
124048	interacts with	CREBBP (interacts with) OGT	false
124049	interacts with	CREBBP (interacts with) COG5	false
124050	interacts with	CREBBP (interacts with) B4GALT5	false
124051	interacts with	CREBBP (interacts with) MGAT3	false
124052	interacts with	CREBBP (interacts with) SLC35A2	false
124053	interacts with	CSNK2A1 (interacts with) COG8	false
124054	interacts with	DCP1A (interacts with) SLC35D1	false
124055	interacts with	DCP1A (interacts with) EXTL2	false
124056	interacts with	DCP1A (interacts with) PIGO	false
124057	interacts with	DCP1A (interacts with) MOGS	false
124058	interacts with	DDIT3 (interacts with) SLC35B1	false
124059	interacts with	DDX5 (interacts with) FAM20B	false
124060	interacts with	DDX5 (interacts with) COG5	false
124061	interacts with	DICER1 (interacts with) MGAT2	false
124062	interacts with	DICER1 (interacts with) SLC35E1	false
124063	interacts with	DLX4 (interacts with) HS3ST6	false
124064	interacts with	DR1 (interacts with) STT3A	false
124065	interacts with	E2F2 (interacts with) GLCE	false
124066	interacts with	E2F2 (interacts with) SLC35A5	false
124067	interacts with	E2F6 (interacts with) FAM20B	false
124068	interacts with	E2F6 (interacts with) COG5	false
124069	interacts with	E2F6 (interacts with) FPGT	false
124070	interacts with	E2F6 (interacts with) SLC35A1	false
124071	interacts with	E2F6 (interacts with) COG6	false
124072	interacts with	E2F6 (interacts with) PIGP	false
124073	interacts with	E2F6 (interacts with) SLC35A2	false
124074	interacts with	E2F6 (interacts with) OGT	false
124075	interacts with	E2F6 (interacts with) FUT4	false
124076	interacts with	E2F7 (interacts with) ALG10	false
124077	interacts with	E2F7 (interacts with) SLC35A3	false
124078	interacts with	E2F7 (interacts with) DPM1	false
124079	interacts with	E2F7 (interacts with) UGDH	false
124080	interacts with	E2F8 (interacts with) GANAB	false
124081	interacts with	EBF1 (interacts with) CSGALNACT1	false
124082	interacts with	EBF1 (interacts with) IDUA	false
124083	interacts with	EBNA1BP2 (interacts with) DPM1	false
124084	interacts with	EBNA1BP2 (interacts with) GCNT2	false
124085	interacts with	EGLN2 (interacts with) SLC35A2	false
124086	interacts with	EGLN2 (interacts with) MGAT3	false
124087	interacts with	EGR2 (interacts with) MFNG	false
124088	interacts with	EGR2 (interacts with) MGAT1	false
124089	interacts with	EGR2 (interacts with) GM2A	false
124090	interacts with	EGR2 (interacts with) ST3GAL5	false
124091	interacts with	EGR2 (interacts with) SGSH	false
124092	interacts with	EGR2 (interacts with) B3GALT4	false
124093	interacts with	EGR2 (interacts with) FUT7	false
124094	interacts with	EGR2 (interacts with) FUCA1	false
124095	interacts with	EGR2 (interacts with) GBA	false
124096	interacts with	EGR2 (interacts with) CTSA	false
124097	interacts with	EHMT2 (interacts with) STT3A	false
124098	interacts with	EHMT2 (interacts with) ST3GAL6	false
124099	interacts with	EHMT2 (interacts with) GALE	false
124100	interacts with	EHMT2 (interacts with) GALNT3	false
124101	interacts with	EHMT2 (interacts with) B3GAT1	false
124102	interacts with	EHMT2 (interacts with) CHST9	false
124103	interacts with	EHMT2 (interacts with) SLC35F1	false
124104	interacts with	EHMT2 (interacts with) UGGT2	false
124105	interacts with	EHMT2 (interacts with) CHST4	false
124106	interacts with	EHMT2 (interacts with) GLA	false
124107	interacts with	EHMT2 (interacts with) GALNT7	false
124108	interacts with	ELF2 (interacts with) COG3	false
124109	interacts with	EP400 (interacts with) FKTN	false
124110	interacts with	EP400 (interacts with) STT3B	false
124111	interacts with	EP400 (interacts with) OGT	false
124112	interacts with	EP400 (interacts with) ACER2	false
124113	interacts with	EP400 (interacts with) COG5	false
124114	interacts with	EP400 (interacts with) B3GALNT2	false
124115	interacts with	EP400 (interacts with) FPGT	false
124116	interacts with	ERCC3 (interacts with) SLC35A5	false
124117	interacts with	ERCC6 (interacts with) STT3B	false
124118	interacts with	ERCC6 (interacts with) NDST2	false
124119	interacts with	ERCC6 (interacts with) COG5	false
124120	interacts with	ERCC6 (interacts with) ACER2	false
124121	interacts with	ERCC6 (interacts with) UGGT1	false
124122	interacts with	ERCC6 (interacts with) COG6	false
124123	interacts with	ERCC6 (interacts with) SLC35E1	false
124124	interacts with	ERCC6 (interacts with) CSGALNACT2	false
124125	interacts with	ERCC6 (interacts with) SLC35A5	false
124126	interacts with	ERCC6 (interacts with) B3GALNT2	false
124127	interacts with	ERCC6 (interacts with) COG8	false
124128	interacts with	ERCC6 (interacts with) GALNT6	false
124129	interacts with	ERCC6 (interacts with) B4GALNT1	false
124130	interacts with	ERCC6 (interacts with) B4GALT5	false
124131	interacts with	ERCC6 (interacts with) GNE	false
124132	interacts with	ERCC6 (interacts with) FUT4	false
124133	interacts with	ERCC6 (interacts with) SLC35A1	false
124134	interacts with	ERCC6 (interacts with) PIGP	false
124135	interacts with	ETS1 (interacts with) MFNG	false
124136	interacts with	ETS1 (interacts with) ST8SIA4	false
124137	interacts with	ETS1 (interacts with) ST3GAL5	false
124138	interacts with	ETS1 (interacts with) FUT7	false
124139	interacts with	ETV4 (interacts with) CHST7	false
124140	interacts with	ETV4 (interacts with) SLC35B1	false
124141	interacts with	ETV4 (interacts with) HAS3	false
124142	interacts with	ETV7 (interacts with) MAN2B1	false
124143	interacts with	EZH1 (interacts with) OGT	false
124144	interacts with	EZH1 (interacts with) NDST2	false
124145	interacts with	EZH1 (interacts with) SLC35A1	false
124146	interacts with	EZH1 (interacts with) FPGT	false
124147	interacts with	EZH1 (interacts with) COG6	false
124148	interacts with	EZH1 (interacts with) CTBS	false
124149	interacts with	EZH1 (interacts with) COG5	false
124150	interacts with	FANCD2 (interacts with) PIGW	false
124151	interacts with	FLI1 (interacts with) MFNG	false
124152	interacts with	FLI1 (interacts with) ST8SIA4	false
124153	interacts with	FLI1 (interacts with) FUT7	false
124154	interacts with	FLI1 (interacts with) FUCA1	false
124155	interacts with	FLI1 (interacts with) HK3	false
124156	interacts with	FLI1 (interacts with) ST8SIA1	false
124157	interacts with	FLI1 (interacts with) MGAT1	false
124158	interacts with	FLI1 (interacts with) GM2A	false
124159	interacts with	FLI1 (interacts with) GNS	false
124160	interacts with	FLI1 (interacts with) CTBS	false
124161	interacts with	FLI1 (interacts with) ST6GALNAC4	false
124162	interacts with	FLI1 (interacts with) B3GALT4	false
124163	interacts with	FLI1 (interacts with) IDUA	false
124164	interacts with	FLI1 (interacts with) SGSH	false
124165	interacts with	FLI1 (interacts with) GBA	false
124166	interacts with	FOXH1 (interacts with) GCNT2	false
124167	interacts with	FOXH1 (interacts with) UGP2	false
124168	interacts with	FOXK1 (interacts with) NDST1	false
124169	interacts with	FOXM1 (interacts with) ALG10	false
124170	interacts with	FOXM1 (interacts with) SLC35B1	false
124171	interacts with	FOXM1 (interacts with) MOGS	false
124172	interacts with	FOXM1 (interacts with) DPM1	false
124173	interacts with	FOXM1 (interacts with) SLC35A3	false
124174	interacts with	FOXM1 (interacts with) UGDH	false
124175	interacts with	FOXM1 (interacts with) TPST2	false
124176	interacts with	FOXM1 (interacts with) GCNT2	false
124177	interacts with	FOXM1 (interacts with) CHST4	false
124178	interacts with	FOXP3 (interacts with) FUT7	false
124179	interacts with	FOXP3 (interacts with) ST8SIA4	false
124180	interacts with	FOXP3 (interacts with) LIPA	false
124181	interacts with	FOXP3 (interacts with) MFNG	false
124182	interacts with	FOXP3 (interacts with) ST3GAL5	false
124183	interacts with	FOXP3 (interacts with) NPL	false
124184	interacts with	FOXP3 (interacts with) FUCA1	false
124185	interacts with	FOXP3 (interacts with) NAAA	false
124186	interacts with	FOXP3 (interacts with) GM2A	false
124187	interacts with	FOXP3 (interacts with) B3GALT4	false
124188	interacts with	FOXP3 (interacts with) SGSH	false
124189	interacts with	FUS (interacts with) MOGS	false
124190	interacts with	FUS (interacts with) SLC35B1	false
124191	interacts with	GABPA (interacts with) SLC35A5	false
124192	interacts with	GABPA (interacts with) ALG10B	false
124193	interacts with	GABPA (interacts with) FPGT	false
124194	interacts with	GABPA (interacts with) STT3B	false
124195	interacts with	GABPA (interacts with) COG5	false
124196	interacts with	GABPA (interacts with) B3GALNT2	false
124197	interacts with	GABPA (interacts with) ALG13	false
124198	interacts with	GABPA (interacts with) OGT	false
124199	interacts with	GATA3 (interacts with) SULF2	false
124200	interacts with	GATA3 (interacts with) EXT1	false
124201	interacts with	GATA3 (interacts with) ST3GAL6	false
124202	interacts with	GATA3 (interacts with) CHPF2	false
124203	interacts with	GATA4 (interacts with) ST6GALNAC1	false
124204	interacts with	GATA4 (interacts with) FUT4	false
124205	interacts with	GATA4 (interacts with) ALG14	false
124206	interacts with	GATA6 (interacts with) SULT1C4	false
124207	interacts with	GATA6 (interacts with) CHST3	false
124208	interacts with	GATA6 (interacts with) ST3GAL6	false
124209	interacts with	GATA6 (interacts with) EXT2	false
124210	interacts with	GATA6 (interacts with) CSGALNACT1	false
124211	interacts with	GATA6 (interacts with) B3GNT5	false
124212	interacts with	GLI1 (interacts with) UGP2	false
124213	interacts with	GLI2 (interacts with) UGP2	false
124214	interacts with	GLI2 (interacts with) STT3A	false
124215	interacts with	GLI2 (interacts with) MOGS	false
124216	interacts with	GLIS3 (interacts with) ST6GALNAC1	false
124217	interacts with	GLYR1 (interacts with) ALG1	false
124218	interacts with	GLYR1 (interacts with) COG5	false
124219	interacts with	GLYR1 (interacts with) ALG10B	false
124220	interacts with	GLYR1 (interacts with) GANAB	false
124221	interacts with	GMEB1 (interacts with) ALG10	false
124222	interacts with	GRHL3 (interacts with) HS6ST3	false
124223	interacts with	GRHL3 (interacts with) EXT1	false
124224	interacts with	GRHL3 (interacts with) MOGS	false
124225	interacts with	GRHL3 (interacts with) GALNT7	false
124226	interacts with	GRHL3 (interacts with) HAS3	false
124227	interacts with	GRHL3 (interacts with) HS6ST1	false
124228	interacts with	GTF2I (interacts with) SLC35E3	false
124229	interacts with	GTF2I (interacts with) COG8	false
124230	interacts with	GTF3C2 (interacts with) FUT10	false
124231	interacts with	HBP1 (interacts with) SLC35B4	false
124232	interacts with	HBP1 (interacts with) B4GALNT1	false
124233	interacts with	HCFC1 (interacts with) NEU3	false
124234	interacts with	HCFC1 (interacts with) UGGT1	false
124235	interacts with	HCFC1 (interacts with) MAN1A2	false
124236	interacts with	HCFC1 (interacts with) COG8	false
124237	interacts with	HCFC1 (interacts with) NDST1	false
124238	interacts with	HCFC1 (interacts with) ACER2	false
124239	interacts with	HCFC1 (interacts with) RTF1	false
124240	interacts with	HCFC1 (interacts with) FUT10	false
124241	interacts with	HCFC1 (interacts with) SLC35E3	false
124242	interacts with	HDAC1 (interacts with) ALG6	false
124243	interacts with	HDAC1 (interacts with) GALE	false
124244	interacts with	HDAC1 (interacts with) SLC35B1	false
124245	interacts with	HDAC1 (interacts with) DPM1	false
124246	interacts with	HDAC1 (interacts with) TPST2	false
124247	interacts with	HDAC1 (interacts with) GNPNAT1	false
124248	interacts with	HDAC1 (interacts with) NANS	false
124249	interacts with	HDAC1 (interacts with) RFNG	false
124250	interacts with	HDAC1 (interacts with) MOGS	false
124251	interacts with	HDAC1 (interacts with) STT3A	false
124252	interacts with	HDAC1 (interacts with) B3GNT7	false
124253	interacts with	HDAC8 (interacts with) MOGS	false
124254	interacts with	HDAC8 (interacts with) B4GALNT4	false
124255	interacts with	HECTD1 (interacts with) FUT11	false
124256	interacts with	HECTD1 (interacts with) UGCG	false
124257	interacts with	HECTD1 (interacts with) FUT8	false
124258	interacts with	HECTD1 (interacts with) B4GALT5	false
124259	interacts with	HEXIM1 (interacts with) CHPF2	false
124260	interacts with	HEYL (interacts with) GAL3ST4	false
124261	interacts with	HIF1A (interacts with) STT3B	false
124262	interacts with	HIF1A (interacts with) MAN2A1	false
124263	interacts with	HIF1A (interacts with) FUT11	false
124264	interacts with	HIF1A (interacts with) SLC35F5	false
124265	interacts with	HIF1A (interacts with) B4GALT5	false
124266	interacts with	HIF1A (interacts with) COG6	false
124267	interacts with	HIF1A (interacts with) GALC	false
124268	interacts with	HIF1A (interacts with) B3GNT2	false
124269	interacts with	HIF1A (interacts with) NEU3	false
124270	interacts with	HIF1A (interacts with) MGAT5	false
124271	interacts with	HIF1A (interacts with) SLC35E1	false
124272	interacts with	HIF1A (interacts with) HS2ST1	false
124273	interacts with	HIF1A (interacts with) FKTN	false
124274	interacts with	HIF1A (interacts with) ALG10B	false
124275	interacts with	HIF1A (interacts with) SLC35E3	false
124276	interacts with	HIF1A (interacts with) NDST1	false
124277	interacts with	HINFP (interacts with) DPAGT1	false
124278	interacts with	HIRA (interacts with) UGCG	false
124279	interacts with	HIRA (interacts with) UGGT1	false
124280	interacts with	HIRA (interacts with) SLC35A3	false
124281	interacts with	HIRA (interacts with) MAN1A2	false
124282	interacts with	HMGN1 (interacts with) DPM1	false
124283	interacts with	HMGN1 (interacts with) MOGS	false
124284	interacts with	HNF4A (interacts with) SLC35A3	false
124285	interacts with	HNF4A (interacts with) GALNT7	false
124286	interacts with	HNF4A (interacts with) B4GALT4	false
124287	interacts with	HNF4A (interacts with) B3GNT5	false
124288	interacts with	HNF4A (interacts with) UGDH	false
124289	interacts with	HNF4A (interacts with) EXT1	false
124290	interacts with	ID3 (interacts with) GNPNAT1	false
124291	interacts with	ID3 (interacts with) STT3A	false
124292	interacts with	IKZF1 (interacts with) MFNG	false
124293	interacts with	IKZF1 (interacts with) ST8SIA4	false
124294	interacts with	IKZF1 (interacts with) LAMP3	false
124295	interacts with	IKZF1 (interacts with) MAN2B1	false
124296	interacts with	IKZF1 (interacts with) GM2A	false
124297	interacts with	IKZF1 (interacts with) FUT7	false
124298	interacts with	IKZF1 (interacts with) ST3GAL5	false
124299	interacts with	IKZF1 (interacts with) FUCA1	false
124300	interacts with	IKZF1 (interacts with) NDST2	false
124301	interacts with	IKZF1 (interacts with) NAGK	false
124302	interacts with	IKZF1 (interacts with) CSGALNACT2	false
124303	interacts with	IKZF1 (interacts with) B3GALT4	false
124304	interacts with	INO80 (interacts with) MGAT3	false
124305	interacts with	IRF1 (interacts with) HK3	false
124306	interacts with	IRF1 (interacts with) LAMP3	false
124307	interacts with	IRF1 (interacts with) ST8SIA4	false
124308	interacts with	IRF1 (interacts with) NAGK	false
124309	interacts with	IRF1 (interacts with) MGAT1	false
124310	interacts with	IRF1 (interacts with) LIPA	false
124311	interacts with	IRF1 (interacts with) ST3GAL5	false
124312	interacts with	IRF1 (interacts with) B3GALT4	false
124313	interacts with	IRF1 (interacts with) GM2A	false
124314	interacts with	IRF1 (interacts with) GNS	false
124315	interacts with	IRF3 (interacts with) B3GAT3	false
124316	interacts with	IRF3 (interacts with) GMPPA	false
124317	interacts with	IRF3 (interacts with) ST3GAL5	false
124318	interacts with	IRF4 (interacts with) MFNG	false
124319	interacts with	IRF4 (interacts with) ST3GAL5	false
124320	interacts with	IRF4 (interacts with) GM2A	false
124321	interacts with	IRF4 (interacts with) LIPA	false
124322	interacts with	IRF4 (interacts with) NAAA	false
124323	interacts with	IRF4 (interacts with) FUCA1	false
124324	interacts with	IRF4 (interacts with) B3GALT4	false
124325	interacts with	IRF4 (interacts with) CTBS	false
124326	interacts with	IRF5 (interacts with) HK3	false
124327	interacts with	IRF5 (interacts with) FUT7	false
124328	interacts with	IRF5 (interacts with) MFNG	false
124329	interacts with	IRF5 (interacts with) MAN2B1	false
124330	interacts with	IRF5 (interacts with) MGAT1	false
124331	interacts with	IRF5 (interacts with) GM2A	false
124332	interacts with	IRF5 (interacts with) NAAA	false
124333	interacts with	IRF5 (interacts with) CTSA	false
124334	interacts with	IRF5 (interacts with) ARSA	false
124335	interacts with	IRF5 (interacts with) SGSH	false
124336	interacts with	IRF5 (interacts with) IDUA	false
124337	interacts with	IRF8 (interacts with) HK3	false
124338	interacts with	IRF8 (interacts with) ST8SIA4	false
124339	interacts with	IRF8 (interacts with) LIPA	false
124340	interacts with	IRF8 (interacts with) FUCA1	false
124341	interacts with	IRF8 (interacts with) NAAA	false
124342	interacts with	IRF8 (interacts with) GM2A	false
124343	interacts with	IRF8 (interacts with) CSGALNACT2	false
124344	interacts with	IRF8 (interacts with) GNS	false
124345	interacts with	IRF8 (interacts with) B3GALT4	false
124346	interacts with	JARID2 (interacts with) GNPNAT1	false
124347	interacts with	JARID2 (interacts with) GALNT3	false
124348	interacts with	JARID2 (interacts with) B4GALNT2	false
124349	interacts with	JARID2 (interacts with) GALNT7	false
124350	interacts with	JARID2 (interacts with) A4GALT	false
124351	interacts with	JARID2 (interacts with) CHST7	false
124352	interacts with	JMJD1C (interacts with) FUT11	false
124353	interacts with	JMJD1C (interacts with) STT3B	false
124354	interacts with	JMJD1C (interacts with) NEU3	false
124355	interacts with	JMJD1C (interacts with) GANAB	false
124356	interacts with	JMJD1C (interacts with) UGGT1	false
124357	interacts with	JMJD1C (interacts with) B4GALT5	false
124358	interacts with	JMJD1C (interacts with) ALG13	false
124359	interacts with	JMJD1C (interacts with) SLC35E3	false
124360	interacts with	KDM3A (interacts with) COG6	false
124361	interacts with	KDM3A (interacts with) ALG13	false
124362	interacts with	KDM5A (interacts with) NEU3	false
124363	interacts with	KDM5A (interacts with) ALG10B	false
124364	interacts with	KDM5A (interacts with) UGGT1	false
124365	interacts with	KDM5A (interacts with) SLC35F5	false
124366	interacts with	KDM5B (interacts with) MAN1A2	false
124367	interacts with	KDM5B (interacts with) STT3B	false
124368	interacts with	KDM5B (interacts with) UGGT1	false
124369	interacts with	KDM5B (interacts with) ACER2	false
124370	interacts with	KDM5B (interacts with) COG8	false
124371	interacts with	KDM5B (interacts with) B4GALT5	false
124372	interacts with	KDM5B (interacts with) NEU3	false
124373	interacts with	KDM5B (interacts with) UGCG	false
124374	interacts with	KLF10 (interacts with) FUT11	false
124375	interacts with	KLF10 (interacts with) ACER2	false
124376	interacts with	KLF10 (interacts with) GANAB	false
124377	interacts with	KLF10 (interacts with) PIGO	false
124378	interacts with	KLF11 (interacts with) FAM20B	false
124379	interacts with	KLF11 (interacts with) STT3B	false
124380	interacts with	KLF11 (interacts with) B4GALT5	false
124381	interacts with	KLF11 (interacts with) ACER2	false
124382	interacts with	KLF11 (interacts with) UGCG	false
124383	interacts with	KLF11 (interacts with) SLC35E1	false
124384	interacts with	KLF11 (interacts with) MGAT3	false
124385	interacts with	KLF11 (interacts with) SLC35B4	false
124386	interacts with	KLF11 (interacts with) GALNT6	false
124387	interacts with	KLF11 (interacts with) COG8	false
124388	interacts with	KLF11 (interacts with) SLC35A2	false
124389	interacts with	KLF11 (interacts with) SLC35D2	false
124390	interacts with	KLF4 (interacts with) UGCG	false
124391	interacts with	KLF4 (interacts with) ACER2	false
124392	interacts with	KLF4 (interacts with) GALNT6	false
124393	interacts with	KLF4 (interacts with) ALG2	false
124394	interacts with	L3MBTL2 (interacts with) MGAT3	false
124395	interacts with	LDB1 (interacts with) FAM20B	false
124396	interacts with	LDB1 (interacts with) MGAT3	false
124397	interacts with	LMO2 (interacts with) ST6GALNAC3	false
124398	interacts with	LMO2 (interacts with) ALG14	false
124399	interacts with	LMO2 (interacts with) PIGP	false
124400	interacts with	LMO2 (interacts with) FUT4	false
124401	interacts with	LMO2 (interacts with) FAM20B	false
124402	interacts with	LMO2 (interacts with) B3GNT9	false
124403	interacts with	LMO2 (interacts with) MGAT2	false
124404	interacts with	LMO2 (interacts with) SLC35A2	false
124405	interacts with	LYL1 (interacts with) MFNG	false
124406	interacts with	LYL1 (interacts with) FUT7	false
124407	interacts with	LYL1 (interacts with) MAN2B1	false
124408	interacts with	LYL1 (interacts with) MGAT1	false
124409	interacts with	LYL1 (interacts with) HK3	false
124410	interacts with	LYL1 (interacts with) ST8SIA4	false
124411	interacts with	LYL1 (interacts with) IDUA	false
124412	interacts with	LYL1 (interacts with) ST6GALNAC4	false
124413	interacts with	LYL1 (interacts with) ST3GAL5	false
124414	interacts with	LYL1 (interacts with) NPL	false
124415	interacts with	LYL1 (interacts with) NAAA	false
124416	interacts with	MBD3 (interacts with) B4GALT7	false
124417	interacts with	MECP2 (interacts with) NDST2	false
124418	interacts with	MECP2 (interacts with) SLC35E1	false
124419	interacts with	MECP2 (interacts with) ALG14	false
124420	interacts with	MECP2 (interacts with) GLCE	false
124421	interacts with	MECP2 (interacts with) SLC35A1	false
124422	interacts with	MECP2 (interacts with) FPGT	false
124423	interacts with	MECP2 (interacts with) COG6	false
124424	interacts with	MECP2 (interacts with) PIGP	false
124425	interacts with	MECP2 (interacts with) FUT4	false
124426	interacts with	MED1 (interacts with) GANAB	false
124427	interacts with	MED1 (interacts with) PIGO	false
124428	interacts with	MNT (interacts with) ST3GAL2	false
124429	interacts with	MNT (interacts with) COG5	false
124430	interacts with	MRE11A (interacts with) DPAGT1	false
124431	interacts with	MYBL1 (interacts with) SLC35A2	false
124432	interacts with	NCOR1 (interacts with) SLC35D1	false
124433	interacts with	NFATC1 (interacts with) FUT7	false
124434	interacts with	NFATC1 (interacts with) MAN2B1	false
124435	interacts with	NFATC1 (interacts with) ARSA	false
124436	interacts with	NFATC1 (interacts with) HK3	false
124437	interacts with	NFATC1 (interacts with) B3GALT4	false
124438	interacts with	NFATC1 (interacts with) MGAT1	false
124439	interacts with	NFATC1 (interacts with) LAMP3	false
124440	interacts with	NFATC1 (interacts with) CTBS	false
124441	interacts with	NFYA (interacts with) STT3B	false
124442	interacts with	NFYA (interacts with) FAM20B	false
124443	interacts with	NFYA (interacts with) OGT	false
124444	interacts with	NFYA (interacts with) SLC35E1	false
124445	interacts with	NFYA (interacts with) SLC35B4	false
124446	interacts with	NFYA (interacts with) MGAT3	false
124447	interacts with	NFYA (interacts with) SLC35A2	false
124448	interacts with	NFYC (interacts with) GALE	false
124449	interacts with	NFYC (interacts with) CHST12	false
124450	interacts with	NIPBL (interacts with) SLC35A5	false
124451	interacts with	NIPBL (interacts with) COG5	false
124452	interacts with	NIPBL (interacts with) FAM20B	false
124453	interacts with	NIPBL (interacts with) SLC35B4	false
124454	interacts with	NIPBL (interacts with) SLC35A1	false
124455	interacts with	NKX2-5 (interacts with) SLC35B1	false
124456	interacts with	NKX2-5 (interacts with) MOGS	false
124457	interacts with	NKX2-5 (interacts with) CHPF	false
124458	interacts with	NKX2-5 (interacts with) GNPDA1	false
124459	interacts with	NME2 (interacts with) A4GALT	false
124460	interacts with	NR1H3 (interacts with) NAAA	false
124461	interacts with	NR1H3 (interacts with) GNS	false
124462	interacts with	NR2C2 (interacts with) STT3B	false
124463	interacts with	NR2C2 (interacts with) FKTN	false
124464	interacts with	NR2C2 (interacts with) OGT	false
124465	interacts with	NR2C2 (interacts with) FUT11	false
124466	interacts with	NR2C2 (interacts with) FAM20B	false
124467	interacts with	NR2C2 (interacts with) COG5	false
124468	interacts with	NR2C2 (interacts with) SLC35B4	false
124469	interacts with	NR2C2 (interacts with) B3GALNT2	false
124470	interacts with	NR2C2 (interacts with) SLC35E1	false
124471	interacts with	NR2C2 (interacts with) GNE	false
124472	interacts with	NR2C2 (interacts with) SLC35A2	false
124473	interacts with	NR5A2 (interacts with) GCNT2	false
124474	interacts with	NR5A2 (interacts with) GFPT1	false
124475	interacts with	OVOL2 (interacts with) NANS	false
124476	interacts with	OVOL2 (interacts with) MOGS	false
124477	interacts with	OVOL2 (interacts with) GALK1	false
124478	interacts with	PALB2 (interacts with) SLC35A5	false
124479	interacts with	PCGF6 (interacts with) PIGW	false
124480	interacts with	PHF8 (interacts with) COG5	false
124481	interacts with	PHF8 (interacts with) ACER2	false
124482	interacts with	PHF8 (interacts with) UGGT1	false
124483	interacts with	PHF8 (interacts with) STT3B	false
124484	interacts with	PHF8 (interacts with) PIGN	false
124485	interacts with	PHF8 (interacts with) SLC35A2	false
124486	interacts with	PHF8 (interacts with) SLC35A5	false
124487	interacts with	PHF8 (interacts with) ALG13	false
124488	interacts with	PHF8 (interacts with) UGCG	false
124489	interacts with	PHF8 (interacts with) B4GALT5	false
124490	interacts with	PHF8 (interacts with) SLC35B4	false
124491	interacts with	PIAS1 (interacts with) MGAT5	false
124492	interacts with	PIAS1 (interacts with) COG5	false
124493	interacts with	PIAS1 (interacts with) SLC35A5	false
124494	interacts with	PIAS1 (interacts with) COG6	false
124495	interacts with	PIAS1 (interacts with) OGT	false
124496	interacts with	PIAS1 (interacts with) COG8	false
124497	interacts with	PIAS1 (interacts with) SLC35B4	false
124498	interacts with	PIAS1 (interacts with) SLC35E1	false
124499	interacts with	PIAS1 (interacts with) MGAT3	false
124500	interacts with	PIAS1 (interacts with) FUT4	false
124501	interacts with	PIAS1 (interacts with) ST6GALNAC3	false
124502	interacts with	PIAS1 (interacts with) PIGP	false
124503	interacts with	PITX1 (interacts with) SULF2	false
124504	interacts with	PML (interacts with) FUT7	false
124505	interacts with	PML (interacts with) LAMP3	false
124506	interacts with	PML (interacts with) MFNG	false
124507	interacts with	PML (interacts with) ST3GAL5	false
124508	interacts with	PML (interacts with) ARSA	false
124509	interacts with	POLR2B (interacts with) STT3B	false
124510	interacts with	POLR2B (interacts with) UGGT1	false
124511	interacts with	POLR2B (interacts with) SLC35A5	false
124512	interacts with	POLR2B (interacts with) COG2	false
124513	interacts with	POLR3A (interacts with) MGAT5	false
124514	interacts with	POLR3A (interacts with) NEU3	false
124515	interacts with	POLR3A (interacts with) MAN2A1	false
124516	interacts with	POLR3A (interacts with) UGCG	false
124517	interacts with	POLR3A (interacts with) ACER2	false
124518	interacts with	POLR3A (interacts with) SLC35E3	false
124519	interacts with	POLR3A (interacts with) PIGN	false
124520	interacts with	POLR3A (interacts with) SLC35B4	false
124521	interacts with	POLR3A (interacts with) FUT11	false
124522	interacts with	POLR3A (interacts with) SLC35A2	false
124523	interacts with	POLR3D (interacts with) B4GALT5	false
124524	interacts with	POLR3D (interacts with) STT3B	false
124525	interacts with	POLR3D (interacts with) UGCG	false
124526	interacts with	POU2F2 (interacts with) MAN2A2	false
124527	interacts with	POU5F1 (interacts with) CHST8	false
124528	interacts with	POU5F1 (interacts with) A4GALT	false
124529	interacts with	POU5F1 (interacts with) B3GNT7	false
124530	interacts with	POU5F1 (interacts with) TPST2	false
124531	interacts with	PRDM1 (interacts with) CSGALNACT2	false
124532	interacts with	PRDM1 (interacts with) B4GALNT1	false
124533	interacts with	PRDM1 (interacts with) STT3B	false
124534	interacts with	PRDM1 (interacts with) B3GAT2	false
124535	interacts with	PRDM1 (interacts with) MGAT3	false
124536	interacts with	PRDM1 (interacts with) ST6GALNAC1	false
124537	interacts with	PRDM1 (interacts with) FAM20B	false
124538	interacts with	PRDM1 (interacts with) SLC35A1	false
124539	interacts with	PRDM1 (interacts with) GCNT1	false
124540	interacts with	PRDM1 (interacts with) GALNT1	false
124541	interacts with	PRDM1 (interacts with) SLC35E1	false
124542	interacts with	PRDM1 (interacts with) MGAT2	false
124543	interacts with	PRDM14 (interacts with) TPST2	false
124544	interacts with	PRDM14 (interacts with) GCNT2	false
124545	interacts with	PRDM14 (interacts with) A4GALT	false
124546	interacts with	PRDM14 (interacts with) B3GNT7	false
124547	interacts with	PRDM14 (interacts with) B4GALNT2	false
124548	interacts with	PRDM14 (interacts with) SLC35A3	false
124549	interacts with	PRDM4 (interacts with) MGAT5	false
124550	interacts with	PRDM4 (interacts with) B4GALNT1	false
124551	interacts with	PRKDC (interacts with) ALG10	false
124552	interacts with	PRKDC (interacts with) RTF1	false
124553	interacts with	PRKDC (interacts with) NDST1	false
124554	interacts with	PRKDC (interacts with) SLC35F5	false
124555	interacts with	PRKDC (interacts with) COG8	false
124556	interacts with	PRKDC (interacts with) UGCG	false
124557	interacts with	PRKDC (interacts with) FUT10	false
124558	interacts with	PRKDC (interacts with) MAN2A1	false
124559	interacts with	RBBP5 (interacts with) MAN1A2	false
124560	interacts with	RBBP5 (interacts with) COG5	false
124561	interacts with	RBBP5 (interacts with) ACER2	false
124562	interacts with	RBBP5 (interacts with) UGGT1	false
124563	interacts with	RBBP5 (interacts with) SLC35E1	false
124564	interacts with	RBBP5 (interacts with) PIGN	false
124565	interacts with	RBBP5 (interacts with) STT3B	false
124566	interacts with	RBBP5 (interacts with) B3GALNT2	false
124567	interacts with	RBBP5 (interacts with) UGCG	false
124568	interacts with	RBBP5 (interacts with) SLC35A5	false
124569	interacts with	RBBP5 (interacts with) B4GALT5	false
124570	interacts with	RBBP5 (interacts with) COG8	false
124571	interacts with	RCOR1 (interacts with) UGCG	false
124572	interacts with	RFX7 (interacts with) NEU3	false
124573	interacts with	RFX7 (interacts with) MGAT3	false
124574	interacts with	RNF2 (interacts with) FAM20B	false
124575	interacts with	RNF2 (interacts with) STT3B	false
124576	interacts with	RNF2 (interacts with) SLC35A5	false
124577	interacts with	RNF2 (interacts with) ALG10B	false
124578	interacts with	RNF2 (interacts with) ACER2	false
124579	interacts with	RNF2 (interacts with) SLC35B4	false
124580	interacts with	RNF2 (interacts with) SLC35A2	false
124581	interacts with	RUNX3 (interacts with) B3GALT4	false
124582	interacts with	SETDB1 (interacts with) FAM20B	false
124583	interacts with	SETDB1 (interacts with) SLC35A2	false
124584	interacts with	SETDB1 (interacts with) SLC35A5	false
124585	interacts with	SFMBT1 (interacts with) STT3B	false
124586	interacts with	SFMBT1 (interacts with) SLC35A5	false
124587	interacts with	SFMBT1 (interacts with) B3GALNT2	false
124588	interacts with	SFMBT1 (interacts with) SLC35B4	false
124589	interacts with	SFMBT1 (interacts with) GALNT1	false
124590	interacts with	SFMBT1 (interacts with) GALC	false
124591	interacts with	SFMBT1 (interacts with) SLC35A1	false
124592	interacts with	SIN3A (interacts with) RTF1	false
124593	interacts with	SIN3A (interacts with) NEU3	false
124594	interacts with	SIN3A (interacts with) MAN1A2	false
124595	interacts with	SIN3A (interacts with) UGGT1	false
124596	interacts with	SIN3A (interacts with) COG5	false
124597	interacts with	SIN3A (interacts with) ACER2	false
124598	interacts with	SIN3A (interacts with) SLC35A5	false
124599	interacts with	SIN3A (interacts with) COG6	false
124600	interacts with	SIN3A (interacts with) COG8	false
124601	interacts with	SIN3A (interacts with) SLC35B4	false
124602	interacts with	SIN3A (interacts with) B4GALT5	false
124603	interacts with	SIRT6 (interacts with) DPM2	false
124604	interacts with	SIX5 (interacts with) MGAT3	false
124605	interacts with	SIX5 (interacts with) SLC35A1	false
124606	interacts with	SIX5 (interacts with) SLC35A2	false
124607	interacts with	SIX5 (interacts with) SLC35E1	false
124608	interacts with	SIX5 (interacts with) ALG14	false
124609	interacts with	SMAD3 (interacts with) ST6GALNAC3	false
124610	interacts with	SMAD3 (interacts with) MGAT3	false
124611	interacts with	SMAD3 (interacts with) GLCE	false
124612	interacts with	SMAD3 (interacts with) FAM20B	false
124613	interacts with	SMAD3 (interacts with) MGAT2	false
124614	interacts with	SMAD3 (interacts with) ST3GAL2	false
124615	interacts with	SMAD3 (interacts with) GNE	false
124616	interacts with	SMAD3 (interacts with) FUT8	false
124617	interacts with	SMAD3 (interacts with) SLC35E1	false
124618	interacts with	SMAD3 (interacts with) COG6	false
124619	interacts with	SMAD3 (interacts with) B4GALNT1	false
124620	interacts with	SMAD3 (interacts with) CSGALNACT2	false
124621	interacts with	SMAD3 (interacts with) B3GNT9	false
124622	interacts with	SMAD3 (interacts with) FPGT	false
124623	interacts with	SMAD3 (interacts with) STT3B	false
124624	interacts with	SMAD3 (interacts with) PIGH	false
124625	interacts with	SMAD3 (interacts with) COG5	false
124626	interacts with	SMAD3 (interacts with) SLC35A2	false
124627	interacts with	SMARCA4 (interacts with) B3GALNT2	false
124628	interacts with	SMC1A (interacts with) NEU3	false
124629	interacts with	SMC1A (interacts with) STT3B	false
124630	interacts with	SMC1A (interacts with) MAN1A2	false
124631	interacts with	SMC1A (interacts with) UGGT1	false
124632	interacts with	SMC1A (interacts with) RTF1	false
124633	interacts with	SMC1A (interacts with) MAN2A1	false
124634	interacts with	SMC1A (interacts with) ACER2	false
124635	interacts with	SMC1A (interacts with) SLC35A3	false
124636	interacts with	SMC1A (interacts with) PIGN	false
124637	interacts with	SMC1A (interacts with) B4GALT5	false
124638	interacts with	SMC1A (interacts with) UGCG	false
124639	interacts with	SMC1A (interacts with) SLC35E3	false
124640	interacts with	SMC3 (interacts with) STT3B	false
124641	interacts with	SMC3 (interacts with) FUT11	false
124642	interacts with	SMC3 (interacts with) NEU3	false
124643	interacts with	SMC3 (interacts with) SLC35A5	false
124644	interacts with	SMC3 (interacts with) FAM20B	false
124645	interacts with	SMC3 (interacts with) COG5	false
124646	interacts with	SMC3 (interacts with) MAN1A2	false
124647	interacts with	SMC3 (interacts with) UGCG	false
124648	interacts with	SMC3 (interacts with) UGGT1	false
124649	interacts with	SMC3 (interacts with) SLC35E3	false
124650	interacts with	SMC3 (interacts with) ACER2	false
124651	interacts with	SMC3 (interacts with) B4GALT5	false
124652	interacts with	SMC3 (interacts with) B3GALNT2	false
124653	interacts with	SMC3 (interacts with) COG8	false
124654	interacts with	SMC3 (interacts with) SLC35B4	false
124655	interacts with	SMC3 (interacts with) B3GALT5	false
124656	interacts with	SNAPC1 (interacts with) SLC35A5	false
124657	interacts with	SNAPC5 (interacts with) SLC35A5	false
124658	interacts with	SND1 (interacts with) MGAT5	false
124659	interacts with	SND1 (interacts with) B4GALT5	false
124660	interacts with	SOX17 (interacts with) SLC35A2	false
124661	interacts with	SOX17 (interacts with) GALNT1	false
124662	interacts with	SOX2 (interacts with) CHST7	false
124663	interacts with	SOX2 (interacts with) GCNT2	false
124664	interacts with	SOX2 (interacts with) GFPT2	false
124665	interacts with	SOX2 (interacts with) UGP2	false
124666	interacts with	SOX2 (interacts with) CHPF	false
124667	interacts with	SOX2 (interacts with) GALNT3	false
124668	interacts with	SOX2 (interacts with) NANS	false
124669	interacts with	SOX2 (interacts with) SLC35B1	false
124670	interacts with	SOX2 (interacts with) STT3A	false
124671	interacts with	SOX2 (interacts with) RFNG	false
124672	interacts with	SOX2 (interacts with) CHST8	false
124673	interacts with	SOX2 (interacts with) GALE	false
124674	interacts with	SOX2 (interacts with) EXT1	false
124675	interacts with	SOX2 (interacts with) HK1	false
124676	interacts with	SOX2 (interacts with) B3GNT7	false
124677	interacts with	SOX2 (interacts with) TPST2	false
124678	interacts with	SOX2 (interacts with) HAS3	false
124679	interacts with	SP2 (interacts with) PIGO	false
124680	interacts with	SPIB (interacts with) FUT7	false
124681	interacts with	SRCAP (interacts with) PIGG	false
124682	interacts with	SRCAP (interacts with) MGAT3	false
124683	interacts with	SSRP1 (interacts with) ALG10	false
124684	interacts with	SSRP1 (interacts with) DPM1	false
124685	interacts with	SSRP1 (interacts with) PGM1	false
124686	interacts with	SSRP1 (interacts with) GALNT7	false
124687	interacts with	STAT1 (interacts with) LAMP3	false
124688	interacts with	STAT1 (interacts with) HK3	false
124689	interacts with	STAT1 (interacts with) LIPA	false
124690	interacts with	STAT1 (interacts with) ST8SIA4	false
124691	interacts with	STAT1 (interacts with) GM2A	false
124692	interacts with	STAT1 (interacts with) NPL	false
124693	interacts with	STAT1 (interacts with) IDS	false
124694	interacts with	STAT1 (interacts with) CSGALNACT2	false
124695	interacts with	STAT1 (interacts with) ST3GAL5	false
124696	interacts with	STAT1 (interacts with) MFNG	false
124697	interacts with	STAT1 (interacts with) NAAA	false
124698	interacts with	STAT1 (interacts with) HS3ST3B1	false
124699	interacts with	STAT1 (interacts with) GNS	false
124700	interacts with	STAT1 (interacts with) MAN2B1	false
124701	interacts with	STAT1 (interacts with) MGAT1	false
124702	interacts with	STAT1 (interacts with) FUCA1	false
124703	interacts with	STAT1 (interacts with) GBA	false
124704	interacts with	STAT1 (interacts with) FUT4	false
124705	interacts with	STAT1 (interacts with) B3GALT4	false
124706	interacts with	STAT2 (interacts with) OGT	false
124707	interacts with	STAT2 (interacts with) GNS	false
124708	interacts with	STAT2 (interacts with) CSGALNACT2	false
124709	interacts with	STAT2 (interacts with) FUT4	false
124710	interacts with	STAT2 (interacts with) GALNT1	false
124711	interacts with	STAT2 (interacts with) GALC	false
124712	interacts with	STAT4 (interacts with) FUT7	false
124713	interacts with	STAT4 (interacts with) ST8SIA4	false
124714	interacts with	STAT4 (interacts with) MFNG	false
124715	interacts with	STAT4 (interacts with) FUCA1	false
124716	interacts with	STAT4 (interacts with) GM2A	false
124717	interacts with	STAT4 (interacts with) ST8SIA1	false
124718	interacts with	STAT4 (interacts with) MAN2B1	false
124719	interacts with	STAT4 (interacts with) NPL	false
124720	interacts with	STAT4 (interacts with) NAAA	false
124721	interacts with	STAT4 (interacts with) MGAT1	false
124722	interacts with	STAT4 (interacts with) B3GALT4	false
124723	interacts with	STAT4 (interacts with) SGSH	false
124724	interacts with	STAT5A (interacts with) MFNG	false
124725	interacts with	STAT5A (interacts with) GM2A	false
124726	interacts with	STAT5A (interacts with) LIPA	false
124727	interacts with	STAT5A (interacts with) NPL	false
124728	interacts with	STAT5A (interacts with) MGAT1	false
124729	interacts with	STAT5A (interacts with) SGSH	false
124730	interacts with	STAT5A (interacts with) B3GALT4	false
124731	interacts with	STAT5A (interacts with) CTSA	false
124732	interacts with	STAT5A (interacts with) B3GALT2	false
124733	interacts with	STAT5B (interacts with) CSGALNACT2	false
124734	interacts with	STAT5B (interacts with) COG1	false
124735	interacts with	STAT5B (interacts with) MAN2A2	false
124736	interacts with	STAT5B (interacts with) OGT	false
124737	interacts with	STAT5B (interacts with) FUT4	false
124738	interacts with	STAT5B (interacts with) ST8SIA1	false
124739	interacts with	STAT5B (interacts with) NDST2	false
124740	interacts with	STAT5B (interacts with) ALG14	false
124741	interacts with	STAT5B (interacts with) LIPA	false
124742	interacts with	STAT5B (interacts with) SGSH	false
124743	interacts with	STAT5B (interacts with) MGAT2	false
124744	interacts with	STAT5B (interacts with) GALNT1	false
124745	interacts with	STAT5B (interacts with) ST3GAL5	false
124746	interacts with	STAT5B (interacts with) NAAA	false
124747	interacts with	STAT5B (interacts with) GNS	false
124748	interacts with	SUMO2 (interacts with) SLC35B1	false
124749	interacts with	SUPT5H (interacts with) PIGP	false
124750	interacts with	SUPT5H (interacts with) ALG14	false
124751	interacts with	SUPT5H (interacts with) SLC35A1	false
124752	interacts with	SUPT5H (interacts with) SLC35A2	false
124753	interacts with	SUPT5H (interacts with) OGT	false
124754	interacts with	SUPT5H (interacts with) SLC35A5	false
124755	interacts with	TAF1 (interacts with) NEU3	false
124756	interacts with	TAF1 (interacts with) MAN1A2	false
124757	interacts with	TAF1 (interacts with) OGT	false
124758	interacts with	TAF1 (interacts with) COG5	false
124759	interacts with	TAF1 (interacts with) STT3B	false
124760	interacts with	TAF1 (interacts with) UGCG	false
124761	interacts with	TAF1 (interacts with) ACER2	false
124762	interacts with	TAF1 (interacts with) UGGT1	false
124763	interacts with	TAF1 (interacts with) SLC35E1	false
124764	interacts with	TAF1 (interacts with) ALG13	false
124765	interacts with	TAF1 (interacts with) SLC35B4	false
124766	interacts with	TAF1 (interacts with) COG6	false
124767	interacts with	TAF1 (interacts with) SLC35F5	false
124768	interacts with	TAF1 (interacts with) SLC35A5	false
124769	interacts with	TAF1 (interacts with) COG8	false
124770	interacts with	TAF1 (interacts with) HS2ST1	false
124771	interacts with	TAF1 (interacts with) PIGN	false
124772	interacts with	TAF3 (interacts with) FUT11	false
124773	interacts with	TAF3 (interacts with) GANAB	false
124774	interacts with	TAF7 (interacts with) SLC35A2	false
124775	interacts with	TBX21 (interacts with) FUT7	false
124776	interacts with	TBX21 (interacts with) GM2A	false
124777	interacts with	TBX21 (interacts with) B3GALT4	false
124778	interacts with	TBX3 (interacts with) UGDH	false
124779	interacts with	TCF21 (interacts with) CHST3	false
124780	interacts with	TCF21 (interacts with) CSGALNACT1	false
124781	interacts with	TCF7L1 (interacts with) EXT1	false
124782	interacts with	TCF7L1 (interacts with) HS6ST1	false
124783	interacts with	TCF7L1 (interacts with) GFPT2	false
124784	interacts with	TCF7L1 (interacts with) GALNT3	false
124785	interacts with	TCF7L1 (interacts with) SULF1	false
124786	interacts with	TCF7L1 (interacts with) GNPNAT1	false
124787	interacts with	TCF7L1 (interacts with) EXT2	false
124788	interacts with	TCF7L1 (interacts with) GALNT9	false
124789	interacts with	TCF7L1 (interacts with) UGDH	false
124790	interacts with	TCF7L1 (interacts with) HAS3	false
124791	interacts with	TCF7L1 (interacts with) GCNT2	false
124792	interacts with	TCF7L1 (interacts with) CHST4	false
124793	interacts with	TDRD3 (interacts with) COG6	false
124794	interacts with	TEAD4 (interacts with) UGP2	false
124795	interacts with	TEAD4 (interacts with) TPST2	false
124796	interacts with	TEAD4 (interacts with) SLC35B1	false
124797	interacts with	TEAD4 (interacts with) A4GALT	false
124798	interacts with	TEAD4 (interacts with) B3GNT7	false
124799	interacts with	TEAD4 (interacts with) GNPNAT1	false
124800	interacts with	TEAD4 (interacts with) CHST4	false
124801	interacts with	TEAD4 (interacts with) HK1	false
124802	interacts with	TEAD4 (interacts with) DPM1	false
124803	interacts with	TEAD4 (interacts with) GCNT2	false
124804	interacts with	TET2 (interacts with) COG5	false
124805	interacts with	TET2 (interacts with) CSGALNACT2	false
124806	interacts with	TET2 (interacts with) COG6	false
124807	interacts with	TET2 (interacts with) B3GAT2	false
124808	interacts with	TET2 (interacts with) PIGP	false
124809	interacts with	TET2 (interacts with) GCNT1	false
124810	interacts with	TET2 (interacts with) FUT4	false
124811	interacts with	TET2 (interacts with) B3GNT9	false
124812	interacts with	TET3 (interacts with) STT3B	false
124813	interacts with	TFAM (interacts with) PIGO	false
124814	interacts with	TFCP2 (interacts with) B4GALT5	false
124815	interacts with	TFCP2 (interacts with) ACER2	false
124816	interacts with	TFDP1 (interacts with) DPM1	false
124817	interacts with	TFDP1 (interacts with) UGDH	false
124818	interacts with	TFDP1 (interacts with) MOGS	false
124819	interacts with	TFE3 (interacts with) NEU1	false
124820	interacts with	TFE3 (interacts with) SULF2	false
124821	interacts with	TGIF1 (interacts with) MOGS	false
124822	interacts with	TGIF1 (interacts with) GALE	false
124823	interacts with	THAP1 (interacts with) COG5	false
124824	interacts with	TOP1 (interacts with) GNPDA1	false
124825	interacts with	TOX4 (interacts with) ST6GALNAC1	false
124826	interacts with	TOX4 (interacts with) GAL3ST1	false
124827	interacts with	TRRAP (interacts with) SLC35A5	false
124828	interacts with	TTF1 (interacts with) UGCG	false
124829	interacts with	TTF2 (interacts with) MAN1A2	false
124830	interacts with	TTF2 (interacts with) NEU3	false
124831	interacts with	TTF2 (interacts with) MAN2A1	false
124832	interacts with	TTF2 (interacts with) UGCG	false
124833	interacts with	TTF2 (interacts with) ACER2	false
124834	interacts with	USF1 (interacts with) DPM2	false
124835	interacts with	USF1 (interacts with) B3GAT3	false
124836	interacts with	USF1 (interacts with) B4GALT7	false
124837	interacts with	USF1 (interacts with) NANS	false
124838	interacts with	USF2 (interacts with) DPM3	false
124839	interacts with	USF2 (interacts with) NAGK	false
124840	interacts with	USP49 (interacts with) UGCG	false
124841	interacts with	USP49 (interacts with) MGAT3	false
124842	interacts with	XRN2 (interacts with) STT3B	false
124843	interacts with	XRN2 (interacts with) MAN2A1	false
124844	interacts with	XRN2 (interacts with) MAN1A2	false
124845	interacts with	XRN2 (interacts with) NEU3	false
124846	interacts with	XRN2 (interacts with) UGGT1	false
124847	interacts with	XRN2 (interacts with) POFUT1	false
124848	interacts with	XRN2 (interacts with) SLC35F5	false
124849	interacts with	XRN2 (interacts with) UGCG	false
124850	interacts with	XRN2 (interacts with) SLC35E3	false
124851	interacts with	XRN2 (interacts with) ACER2	false
124852	interacts with	XRN2 (interacts with) SLC35A5	false
124853	interacts with	XRN2 (interacts with) COG8	false
124854	interacts with	YBX1 (interacts with) CHST8	false
124855	interacts with	YY1 (interacts with) ACER2	false
124856	interacts with	ZBTB10 (interacts with) SLC35F5	false
124857	interacts with	ZBTB10 (interacts with) UGGT1	false
124858	interacts with	ZBTB10 (interacts with) STT3B	false
