# Supplementary material for: A systems-based framework to computationally describe putative transcription factors and signaling pathways regulating glycan biosynthesis
Source: publisher site journal article supplement (doi:10.3762/bjoc.17.119), 2021-07-22
Supplement: Additional file 2 [file 1860-5397-17-119-S2.cys › CytoscapeSession-2021_03_21-12_01/tables/123839-TGCT/LOCAL_ATTRS-org.cytoscape.model.CyNode-TGCT+default+node.cytable]

CyCSV-Version	1
SUID	name	nodeType	selected
java.lang.Long	java.lang.String	java.lang.String	java.lang.Boolean
		mutable
TGCT default node
105684	ADNP	TF	false
105685	FUT7	Glycogene	false
110787	AEBP2	TF	false
105799	DPM1	Glycogene	false
108584	UGP2	Glycogene	false
105699	ARID2	TF	false
105824	COG6	Glycogene	false
107970	ARID3A	TF	false
108551	UGDH	Glycogene	false
105857	DSEL	Glycogene	false
105709	HAS2	Glycogene	false
107296	GCNT2	Glycogene	false
106837	ASCL2	TF	false
105883	GM2A	Glycogene	false
107984	CTSA	Glycogene	false
105754	B3GAT3	Glycogene	false
105704	ATF2	TF	false
105687	MAN1A2	Glycogene	false
105694	MAN2A1	Glycogene	false
105690	FUT11	Glycogene	false
105691	ACER2	Glycogene	false
105689	NEU3	Glycogene	false
105705	UGGT1	Glycogene	false
105688	STT3B	Glycogene	false
105692	COG5	Glycogene	false
105731	FAM20B	Glycogene	false
105702	SLC35A5	Glycogene	false
106844	SLC35E1	Glycogene	false
107297	GNE	Glycogene	false
106891	COG8	Glycogene	false
105908	B3GALNT2	Glycogene	false
107335	SLC35A2	Glycogene	false
108550	ATF4	TF	false
105744	RFNG	Glycogene	false
105758	DPM2	Glycogene	false
111091	ATF5	TF	false
105777	MAN2B1	Glycogene	false
105724	MGAT1	Glycogene	false
105840	ST8SIA1	Glycogene	false
105710	ATF7IP	TF	false
105711	ALG10	Glycogene	false
107278	FUT10	Glycogene	false
105712	ATRX	TF	false
105695	SLC35A3	Glycogene	false
105823	COG3	Glycogene	false
107973	AUTS2	TF	false
107327	POFUT2	Glycogene	false
108553	BACH2	TF	false
105721	BATF	TF	false
105765	NAGK	Glycogene	false
106856	FUCA1	Glycogene	false
105776	LAMP3	Glycogene	false
106857	ST3GAL5	Glycogene	false
105834	ST8SIA4	Glycogene	false
107310	NAAA	Glycogene	false
105884	LIPA	Glycogene	false
105725	BCAT1	TF	false
106893	STT3A	Glycogene	false
105707	B3GNT5	Glycogene	false
113219	GMDS	Glycogene	false
110788	BCOR	TF	false
105726	BMI1	TF	false
105715	CSGALNACT2	Glycogene	false
106014	GALNT1	Glycogene	false
105845	SLC35B4	Glycogene	false
106868	MGAT2	Glycogene	false
108606	B3GAT2	Glycogene	false
108552	GCNT1	Glycogene	false
105810	FUT4	Glycogene	false
113212	PIGP	Glycogene	false
105733	BRD1	TF	false
105771	OGT	Glycogene	false
105750	MGAT3	Glycogene	false
107276	BRD2	TF	false
107277	BRD3	TF	false
106843	BRD4	TF	false
105985	UGCG	Glycogene	false
105732	SLC35E3	Glycogene	false
110789	BTAF1	TF	false
108001	SLC35A1	Glycogene	false
105736	C17orf49	TF	false
106030	B3GALT4	Glycogene	false
111093	CAMTA2	TF	false
110804	SGSH	Glycogene	false
105738	CASP8AP2	TF	false
123849	CBX2	TF	false
105920	ST6GALNAC1	Glycogene	false
108572	SLC35B2	Glycogene	false
105741	CBX3	TF	false
108562	CCNT2	TF	false
106848	CDK12	TF	false
105874	PIGO	Glycogene	false
105998	GANAB	Glycogene	false
105756	CDK8	TF	false
105696	SLC35F5	Glycogene	false
105764	CEBPA	TF	false
105859	HK3	Glycogene	false
105860	NPL	Glycogene	false
112216	HEXA	Glycogene	false
112225	ST6GALNAC2	Glycogene	false
105905	GNS	Glycogene	false
110791	CEBPG	TF	false
105769	CHD1	TF	false
105864	ALG13	Glycogene	false
105770	CHD2	TF	false
105772	NDST2	Glycogene	false
105713	FKTN	Glycogene	false
105851	GLCE	Glycogene	false
105976	FPGT	Glycogene	false
105806	ST3GAL2	Glycogene	false
107976	FUT8	Glycogene	false
105773	CHD4	TF	false
105774	CHD8	TF	false
107279	B4GALT5	Glycogene	false
105730	PIGN	Glycogene	false
105775	CIITA	TF	false
105785	CREB1	TF	false
105790	CREBBP	TF	false
108568	CSNK2A1	TF	false
106850	DCP1A	TF	false
105950	SLC35D1	Glycogene	false
105844	EXTL2	Glycogene	false
105762	MOGS	Glycogene	false
110793	DDIT3	TF	false
105798	SLC35B1	Glycogene	false
112218	DDX5	TF	false
107985	DICER1	TF	false
123850	DLX4	TF	false
107280	HS3ST6	Glycogene	false
108571	DR1	TF	false
108573	E2F2	TF	false
105801	E2F6	TF	false
105803	E2F7	TF	false
108575	E2F8	TF	false
105804	EBF1	TF	false
105805	CSGALNACT1	Glycogene	false
105749	IDUA	Glycogene	false
108576	EBNA1BP2	TF	false
105813	EGLN2	TF	false
105816	EGR2	TF	false
105766	MFNG	Glycogene	false
107309	GBA	Glycogene	false
105821	EHMT2	TF	false
105811	ST3GAL6	Glycogene	false
108559	GALE	Glycogene	false
108000	GALNT3	Glycogene	false
113216	B3GAT1	Glycogene	false
105939	CHST9	Glycogene	false
105927	SLC35F1	Glycogene	false
105966	UGGT2	Glycogene	false
113221	CHST4	Glycogene	false
108026	GLA	Glycogene	false
106859	GALNT7	Glycogene	false
105825	ELF2	TF	false
105829	EP400	TF	false
107292	ERCC3	TF	false
105830	ERCC6	TF	false
108561	GALNT6	Glycogene	false
107990	B4GALNT1	Glycogene	false
105839	ETS1	TF	false
108581	ETV4	TF	false
105835	CHST7	Glycogene	false
105941	HAS3	Glycogene	false
118329	ETV7	TF	false
105846	EZH1	TF	false
105869	CTBS	Glycogene	false
105847	FANCD2	TF	false
105729	PIGW	Glycogene	false
105848	FLI1	TF	false
106839	ST6GALNAC4	Glycogene	false
123851	FOXH1	TF	false
107298	FOXK1	TF	false
105923	NDST1	Glycogene	false
105853	FOXM1	TF	false
106840	TPST2	Glycogene	false
105858	FOXP3	TF	false
106862	FUS	TF	false
105861	GABPA	TF	false
105727	ALG10B	Glycogene	false
109677	GATA3	TF	false
105979	SULF2	Glycogene	false
108580	EXT1	Glycogene	false
108007	CHPF2	Glycogene	false
116607	GATA4	TF	false
107992	ALG14	Glycogene	false
105862	GATA6	TF	false
105837	SULT1C4	Glycogene	false
105807	CHST3	Glycogene	false
107307	EXT2	Glycogene	false
107991	GLI1	TF	false
105865	GLI2	TF	false
112220	GLIS3	TF	false
105866	GLYR1	TF	false
105867	ALG1	Glycogene	false
120757	GMEB1	TF	false
114938	GRHL3	TF	false
114930	HS6ST3	Glycogene	false
107996	HS6ST1	Glycogene	false
105871	GTF2I	TF	false
107302	GTF3C2	TF	false
108591	HBP1	TF	false
105873	HCFC1	TF	false
105700	RTF1	Glycogene	false
107303	HDAC1	TF	false
106879	ALG6	Glycogene	false
105855	GNPNAT1	Glycogene	false
108002	NANS	Glycogene	false
108004	B3GNT7	Glycogene	false
114939	HDAC8	TF	false
105784	B4GALNT4	Glycogene	false
105875	HECTD1	TF	false
112221	HEXIM1	TF	false
107993	HEYL	TF	false
105778	GAL3ST4	Glycogene	false
106867	HIF1A	TF	false
106869	GALC	Glycogene	false
106838	B3GNT2	Glycogene	false
105893	MGAT5	Glycogene	false
105906	HS2ST1	Glycogene	false
105877	HINFP	TF	false
105878	DPAGT1	Glycogene	false
108595	HIRA	TF	false
123043	HMGN1	TF	false
107995	HNF4A	TF	false
112227	B4GALT4	Glycogene	false
114940	ID3	TF	false
105882	IKZF1	TF	false
105885	INO80	TF	false
105887	IRF1	TF	false
106872	IRF3	TF	false
105787	GMPPA	Glycogene	false
105888	IRF4	TF	false
105889	IRF5	TF	false
111105	ARSA	Glycogene	false
105890	IRF8	TF	false
107311	JARID2	TF	false
107352	B4GALNT2	Glycogene	false
105768	A4GALT	Glycogene	false
105892	JMJD1C	TF	false
105903	KDM3A	TF	false
105904	KDM5A	TF	false
105907	KDM5B	TF	false
111106	KLF10	TF	false
107316	KLF11	TF	false
116605	SLC35D2	Glycogene	false
107317	KLF4	TF	false
109671	ALG2	Glycogene	false
112224	L3MBTL2	TF	false
107320	LDB1	TF	false
105909	LMO2	TF	false
105815	ST6GALNAC3	Glycogene	false
108032	B3GNT9	Glycogene	false
105911	LYL1	TF	false
107323	MBD3	TF	false
105782	B4GALT7	Glycogene	false
105921	MECP2	TF	false
105924	MED1	TF	false
110801	MNT	TF	false
105931	MRE11A	TF	false
105934	MYBL1	TF	false
108603	NCOR1	TF	false
105944	NFATC1	TF	false
107329	NFYA	TF	false
105946	NFYC	TF	false
105763	CHST12	Glycogene	false
105947	NIPBL	TF	false
123852	NKX2-5	TF	false
108583	CHPF	Glycogene	false
107305	GNPDA1	Glycogene	false
110803	NME2	TF	false
110807	NR1H3	TF	false
105949	NR2C2	TF	false
105952	NR5A2	TF	false
106882	GFPT1	Glycogene	false
118336	OVOL2	TF	false
105753	GALK1	Glycogene	false
112228	PALB2	TF	false
113232	PCGF6	TF	false
107334	PHF8	TF	false
105958	PIAS1	TF	false
123853	PITX1	TF	false
107336	PML	TF	false
105959	POLR2B	TF	false
105973	COG2	Glycogene	false
105960	POLR3A	TF	false
108609	POLR3D	TF	false
106880	POU2F2	TF	false
105748	MAN2A2	Glycogene	false
111110	POU5F1	TF	false
108011	CHST8	Glycogene	false
105962	PRDM1	TF	false
123854	PRDM14	TF	false
108021	PRDM4	TF	false
105963	PRKDC	TF	false
105967	RBBP5	TF	false
105969	RCOR1	TF	false
105974	RFX7	TF	false
105975	RNF2	TF	false
105982	RUNX3	TF	false
107339	SETDB1	TF	false
108615	SFMBT1	TF	false
105984	SIN3A	TF	false
106885	SIRT6	TF	false
105986	SIX5	TF	false
107342	SMAD3	TF	false
105852	PIGH	Glycogene	false
107343	SMARCA4	TF	false
105989	SMC1A	TF	false
105990	SMC3	TF	false
108034	B3GALT5	Glycogene	false
108618	SNAPC1	TF	false
110811	SNAPC5	TF	false
110812	SND1	TF	false
105992	SOX17	TF	false
107345	SOX2	TF	false
105719	GFPT2	Glycogene	false
107293	HK1	Glycogene	false
107346	SP2	TF	false
106888	SPIB	TF	false
105994	SRCAP	TF	false
109689	PIGG	Glycogene	false
105997	SSRP1	TF	false
116601	PGM1	Glycogene	false
105999	STAT1	TF	false
105922	IDS	Glycogene	false
105841	HS3ST3B1	Glycogene	false
106001	STAT2	TF	false
106002	STAT4	TF	false
106003	STAT5A	TF	false
105808	B3GALT2	Glycogene	false
108029	STAT5B	TF	false
106005	COG1	Glycogene	false
106004	SUMO2	TF	false
108622	SUPT5H	TF	false
106006	TAF1	TF	false
107351	TAF3	TF	false
108623	TAF7	TF	false
106889	TBX21	TF	false
116610	TBX3	TF	false
108031	TCF21	TF	false
106009	TCF7L1	TF	false
106883	SULF1	Glycogene	false
108605	GALNT9	Glycogene	false
106011	TDRD3	TF	false
108035	TEAD4	TF	false
106016	TET2	TF	false
118045	TET3	TF	false
113234	TFAM	TF	false
107355	TFCP2	TF	false
108036	TFDP1	TF	false
108625	TFE3	TF	false
107971	NEU1	Glycogene	false
109691	TGIF1	TF	false
108626	THAP1	TF	false
110814	TOP1	TF	false
123855	TOX4	TF	false
116603	GAL3ST1	Glycogene	false
108628	TRRAP	TF	false
111116	TTF1	TF	false
106019	TTF2	TF	false
106021	USF1	TF	false
106022	USF2	TF	false
105722	DPM3	Glycogene	false
113235	USP49	TF	false
106025	XRN2	TF	false
105792	POFUT1	Glycogene	false
111117	YBX1	TF	false
106028	YY1	TF	false
106894	ZBTB10	TF	false
