# Supplementary material for: A systems-based framework to computationally describe putative transcription factors and signaling pathways regulating glycan biosynthesis
Source: publisher site journal article supplement (doi:10.3762/bjoc.17.119), 2021-07-22
Supplement: Additional file 2 [file 1860-5397-17-119-S2.cys › CytoscapeSession-2021_03_21-12_01/tables/124859-THCA/LOCAL_ATTRS-org.cytoscape.model.CyEdge-THCA+default+edge.cytable]

CyCSV-Version	1
SUID	interaction	name	selected
java.lang.Long	java.lang.String	java.lang.String	java.lang.Boolean
THCA default edge
124869	interacts with	ADNP (interacts with) FUT7	false
124870	interacts with	AEBP2 (interacts with) FAM20B	false
124871	interacts with	AFF4 (interacts with) MAN1A2	false
124872	interacts with	AFF4 (interacts with) STT3B	false
124873	interacts with	AFF4 (interacts with) NEU3	false
124874	interacts with	AFF4 (interacts with) FUT11	false
124875	interacts with	AFF4 (interacts with) ACER2	false
124876	interacts with	AFF4 (interacts with) SLC35E1	false
124877	interacts with	AHR (interacts with) UGCG	false
124878	interacts with	AHR (interacts with) GCNT4	false
124879	interacts with	AHR (interacts with) GALNT5	false
124880	interacts with	AHR (interacts with) B3GNT6	false
124881	interacts with	ARID2 (interacts with) RTF1	false
124882	interacts with	ARID2 (interacts with) COG6	false
124883	interacts with	ARNT (interacts with) FUT11	false
124884	interacts with	ARNT (interacts with) GNE	false
124885	interacts with	ARNT (interacts with) NDST1	false
124886	interacts with	ARNT (interacts with) GCNT1	false
124887	interacts with	ARNT (interacts with) MAN2A2	false
124888	interacts with	ARNTL (interacts with) PAPSS1	false
124889	interacts with	ARNTL (interacts with) CHST2	false
124890	interacts with	ARNTL (interacts with) B4GALT5	false
124891	interacts with	ARNTL (interacts with) FUT8	false
124892	interacts with	ARNTL (interacts with) B4GALNT3	false
124893	interacts with	ARNTL (interacts with) B3GNT3	false
124894	interacts with	ARNTL (interacts with) B3GNT6	false
124895	interacts with	ARNTL (interacts with) GALNT7	false
124896	interacts with	ARNTL (interacts with) UAP1	false
124897	interacts with	ARNTL (interacts with) GLCE	false
124898	interacts with	ARNTL (interacts with) MGAT4B	false
124899	interacts with	ARNTL (interacts with) SLC17A5	false
124900	interacts with	ARNTL (interacts with) UGCG	false
124901	interacts with	ATF1 (interacts with) SLC35A5	false
124902	interacts with	ATF1 (interacts with) STT3B	false
124903	interacts with	ATF1 (interacts with) SLC35A3	false
124904	interacts with	ATF1 (interacts with) FUT11	false
124905	interacts with	ATF1 (interacts with) GALNT4	false
124906	interacts with	ATF1 (interacts with) NEU3	false
124907	interacts with	ATF1 (interacts with) FAM20B	false
124908	interacts with	ATF1 (interacts with) LAMP2	false
124909	interacts with	ATF1 (interacts with) UGDH	false
124910	interacts with	ATF1 (interacts with) UGGT2	false
124911	interacts with	ATF1 (interacts with) SLC17A5	false
124912	interacts with	ATF2 (interacts with) MAN1A2	false
124913	interacts with	ATF2 (interacts with) MAN2A1	false
124914	interacts with	ATF2 (interacts with) FUT11	false
124915	interacts with	ATF2 (interacts with) SLC35F5	false
124916	interacts with	ATF2 (interacts with) FUT10	false
124917	interacts with	ATF2 (interacts with) GANAB	false
124918	interacts with	ATF2 (interacts with) PIGO	false
124919	interacts with	ATF7IP (interacts with) ALG10	false
124920	interacts with	ATRX (interacts with) FKTN	false
124921	interacts with	ATRX (interacts with) SLC35A3	false
124922	interacts with	ATRX (interacts with) FUT10	false
124923	interacts with	BACH1 (interacts with) CSGALNACT2	false
124924	interacts with	BACH1 (interacts with) UGCG	false
124925	interacts with	BACH1 (interacts with) MAN1A2	false
124926	interacts with	BACH1 (interacts with) FUT11	false
124927	interacts with	BACH1 (interacts with) MAN1A1	false
124928	interacts with	BACH1 (interacts with) ACER2	false
124929	interacts with	BACH1 (interacts with) B4GALT5	false
124930	interacts with	BACH1 (interacts with) PAPSS1	false
124931	interacts with	BACH1 (interacts with) GCNT4	false
124932	interacts with	BACH1 (interacts with) GNB1	false
124933	interacts with	BACH1 (interacts with) B4GALNT3	false
124934	interacts with	BACH1 (interacts with) MGAT3	false
124935	interacts with	BATF3 (interacts with) HK3	false
124936	interacts with	BATF3 (interacts with) ST8SIA4	false
124937	interacts with	BATF3 (interacts with) DSE	false
124938	interacts with	BATF3 (interacts with) B4GALT5	false
124939	interacts with	BCAT1 (interacts with) B3GNT5	false
124940	interacts with	BCAT1 (interacts with) FUT4	false
124941	interacts with	BCAT1 (interacts with) B3GNT3	false
124942	interacts with	BHLHE40 (interacts with) B3GNT3	false
124943	interacts with	BHLHE40 (interacts with) CHST15	false
124944	interacts with	BHLHE40 (interacts with) UGCG	false
124945	interacts with	BHLHE40 (interacts with) B4GALT5	false
124946	interacts with	BHLHE40 (interacts with) GALNT5	false
124947	interacts with	BHLHE40 (interacts with) FUT2	false
124948	interacts with	BHLHE40 (interacts with) MGAT3	false
124949	interacts with	BHLHE40 (interacts with) HPSE	false
124950	interacts with	BHLHE40 (interacts with) PAPSS1	false
124951	interacts with	BHLHE40 (interacts with) B4GALNT3	false
124952	interacts with	BHLHE40 (interacts with) CTSA	false
124953	interacts with	BHLHE40 (interacts with) GNB1	false
124954	interacts with	BHLHE40 (interacts with) B4GALT1	false
124955	interacts with	BHLHE40 (interacts with) MGAT4B	false
124956	interacts with	BHLHE40 (interacts with) UAP1	false
124957	interacts with	BMI1 (interacts with) ALG10B	false
124958	interacts with	BMI1 (interacts with) MAN1A2	false
124959	interacts with	BMI1 (interacts with) ALG10	false
124960	interacts with	BMI1 (interacts with) STT3B	false
124961	interacts with	BMI1 (interacts with) GALNT4	false
124962	interacts with	BMI1 (interacts with) UGCG	false
124963	interacts with	BMI1 (interacts with) PIGK	false
124964	interacts with	BMI1 (interacts with) FKTN	false
124965	interacts with	BMI1 (interacts with) NEU3	false
124966	interacts with	BMI1 (interacts with) MGAT4A	false
124967	interacts with	BMI1 (interacts with) GCNT4	false
124968	interacts with	BRD2 (interacts with) STT3B	false
124969	interacts with	BRD2 (interacts with) GANAB	false
124970	interacts with	BRD2 (interacts with) COG3	false
124971	interacts with	BRD2 (interacts with) PIGO	false
124972	interacts with	BRD2 (interacts with) MAN2A2	false
124973	interacts with	BRD2 (interacts with) FKTN	false
124974	interacts with	BRD2 (interacts with) POFUT2	false
124975	interacts with	BRD2 (interacts with) COG5	false
124976	interacts with	BRD2 (interacts with) STT3A	false
124977	interacts with	BRD2 (interacts with) PIGG	false
124978	interacts with	BRD2 (interacts with) B3GALNT2	false
124979	interacts with	BRD2 (interacts with) FPGT	false
124980	interacts with	BRD2 (interacts with) GALC	false
124981	interacts with	BRD2 (interacts with) TPST1	false
124982	interacts with	BRD2 (interacts with) ALG1	false
124983	interacts with	BRD3 (interacts with) RTF1	false
124984	interacts with	BRD3 (interacts with) STT3B	false
124985	interacts with	BRD3 (interacts with) FUT11	false
124986	interacts with	BRD3 (interacts with) ALG10	false
124987	interacts with	BRD3 (interacts with) MAN1A2	false
124988	interacts with	BRD3 (interacts with) MAN2A1	false
124989	interacts with	BRD3 (interacts with) GANAB	false
124990	interacts with	BRD3 (interacts with) NDST1	false
124991	interacts with	BRD3 (interacts with) FUT10	false
124992	interacts with	BTAF1 (interacts with) ALG10	false
124993	interacts with	BTAF1 (interacts with) PIGL	false
124994	interacts with	C17orf49 (interacts with) B3GAT3	false
124995	interacts with	C17orf49 (interacts with) TSTA3	false
124996	interacts with	C17orf49 (interacts with) B3GALT4	false
124997	interacts with	C17orf96 (interacts with) GALE	false
124998	interacts with	CASP8AP2 (interacts with) ALG10B	false
124999	interacts with	CASP8AP2 (interacts with) ALG10	false
125000	interacts with	CASP8AP2 (interacts with) SLC35A5	false
125001	interacts with	CASP8AP2 (interacts with) NDST2	false
125002	interacts with	CBFA2T3 (interacts with) ST3GAL2	false
125003	interacts with	CBFB (interacts with) CSGALNACT2	false
125004	interacts with	CBFB (interacts with) GALNT7	false
125005	interacts with	CBFB (interacts with) CTBS	false
125006	interacts with	CBFB (interacts with) ST8SIA4	false
125007	interacts with	CBFB (interacts with) SLC35F2	false
125008	interacts with	CBFB (interacts with) B4GALT5	false
125009	interacts with	CBFB (interacts with) UAP1	false
125010	interacts with	CBFB (interacts with) GALNT4	false
125011	interacts with	CBFB (interacts with) FUT8	false
125012	interacts with	CBFB (interacts with) CHST15	false
125013	interacts with	CBFB (interacts with) MGAT3	false
125014	interacts with	CBFB (interacts with) UGCG	false
125015	interacts with	CBFB (interacts with) ST6GALNAC5	false
125016	interacts with	CBX6 (interacts with) UGGT1	false
125017	interacts with	CBX6 (interacts with) ALG10	false
125018	interacts with	CBX8 (interacts with) SLC35B1	false
125019	interacts with	CBX8 (interacts with) CHST14	false
125020	interacts with	CBX8 (interacts with) B4GALT7	false
125021	interacts with	CBX8 (interacts with) GALT	false
125022	interacts with	CBX8 (interacts with) B3GNT9	false
125023	interacts with	CBX8 (interacts with) ALG1	false
125024	interacts with	CBX8 (interacts with) ALG3	false
125025	interacts with	CCDC101 (interacts with) B3GAT3	false
125026	interacts with	CD59 (interacts with) LAMP2	false
125027	interacts with	CD59 (interacts with) SLC17A5	false
125028	interacts with	CD59 (interacts with) RENBP	false
125029	interacts with	CD59 (interacts with) MGAT4B	false
125030	interacts with	CDK9 (interacts with) DPM2	false
125031	interacts with	CDK9 (interacts with) RFNG	false
125032	interacts with	CDK9 (interacts with) B3GAT3	false
125033	interacts with	CDK9 (interacts with) TSTA3	false
125034	interacts with	CDK9 (interacts with) B3GALT6	false
125035	interacts with	CDK9 (interacts with) B3GALT4	false
125036	interacts with	CDK9 (interacts with) HYAL2	false
125037	interacts with	CDK9 (interacts with) GALE	false
125038	interacts with	CEBPA (interacts with) MGAT1	false
125039	interacts with	CEBPA (interacts with) MFNG	false
125040	interacts with	CEBPA (interacts with) SLC35B1	false
125041	interacts with	CEBPA (interacts with) GLA	false
125042	interacts with	CEBPA (interacts with) GALT	false
125043	interacts with	CEBPA (interacts with) SLC35A4	false
125044	interacts with	CEBPA (interacts with) RPN1	false
125045	interacts with	CEBPA (interacts with) ALG14	false
125046	interacts with	CEBPB (interacts with) CHST12	false
125047	interacts with	CEBPB (interacts with) IDUA	false
125048	interacts with	CEBPB (interacts with) GALK1	false
125049	interacts with	CEBPB (interacts with) DPM3	false
125050	interacts with	CHD1 (interacts with) OGT	false
125051	interacts with	CHD1 (interacts with) CSGALNACT2	false
125052	interacts with	CHD1 (interacts with) NEU3	false
125053	interacts with	CHD1 (interacts with) ACER2	false
125054	interacts with	CHD1 (interacts with) FUT11	false
125055	interacts with	CHD2 (interacts with) MAN1A2	false
125056	interacts with	CHD2 (interacts with) NDST2	false
125057	interacts with	CHD2 (interacts with) UGGT2	false
125058	interacts with	CHD2 (interacts with) UGDH	false
125059	interacts with	CHD8 (interacts with) NEU3	false
125060	interacts with	CHD8 (interacts with) STT3B	false
125061	interacts with	CHD8 (interacts with) FUT11	false
125062	interacts with	CHD8 (interacts with) RTF1	false
125063	interacts with	CHD8 (interacts with) PIGO	false
125064	interacts with	CHD8 (interacts with) GANAB	false
125065	interacts with	CHD8 (interacts with) POFUT1	false
125066	interacts with	CHD8 (interacts with) FUT10	false
125067	interacts with	CIITA (interacts with) FUT7	false
125068	interacts with	CIITA (interacts with) MAN2B1	false
125069	interacts with	CIITA (interacts with) GAL3ST4	false
125070	interacts with	CIITA (interacts with) MAN1A1	false
125071	interacts with	CIITA (interacts with) DSE	false
125072	interacts with	CIITA (interacts with) FUT2	false
125073	interacts with	CIITA (interacts with) B4GALT5	false
125074	interacts with	CIITA (interacts with) B3GNT3	false
125075	interacts with	CIITA (interacts with) SULF2	false
125076	interacts with	CLOCK (interacts with) FUT11	false
125077	interacts with	CPSF3L (interacts with) B3GALT6	false
125078	interacts with	CPSF3L (interacts with) RFNG	false
125079	interacts with	CPSF3L (interacts with) B3GAT3	false
125080	interacts with	CPSF3L (interacts with) SLC35C2	false
125081	interacts with	CPSF3L (interacts with) TSTA3	false
125082	interacts with	CPSF3L (interacts with) B4GALT7	false
125083	interacts with	CPSF3L (interacts with) GALE	false
125084	interacts with	CPSF3L (interacts with) COG4	false
125085	interacts with	CPSF3L (interacts with) GPAA1	false
125086	interacts with	CPSF3L (interacts with) B3GALT4	false
125087	interacts with	CREB3 (interacts with) B3GALT4	false
125088	interacts with	CREB3L2 (interacts with) FUT11	false
125089	interacts with	CREBBP (interacts with) FUT11	false
125090	interacts with	CREBBP (interacts with) NEU3	false
125091	interacts with	CREBBP (interacts with) STT3B	false
125092	interacts with	CREBBP (interacts with) FUT10	false
125093	interacts with	CREBBP (interacts with) GANAB	false
125094	interacts with	CTBP1 (interacts with) B3GAT3	false
125095	interacts with	CTBP1 (interacts with) DPM3	false
125096	interacts with	CTBP1 (interacts with) DPM2	false
125097	interacts with	CTBP1 (interacts with) TSTA3	false
125098	interacts with	CTBP2 (interacts with) GANAB	false
125099	interacts with	CTNNB1 (interacts with) FUT11	false
125100	interacts with	CTNNB1 (interacts with) UGCG	false
125101	interacts with	CTNNB1 (interacts with) B4GALT5	false
125102	interacts with	CTNNB1 (interacts with) NEU3	false
125103	interacts with	CTNNB1 (interacts with) PAPSS1	false
125104	interacts with	CTNNB1 (interacts with) GNB1	false
125105	interacts with	CTNNB1 (interacts with) SLC17A5	false
125106	interacts with	CTNNB1 (interacts with) CTBS	false
125107	interacts with	CTNNB1 (interacts with) CHST15	false
125108	interacts with	CTNNB1 (interacts with) ACER2	false
125109	interacts with	CTNNB1 (interacts with) LAMP2	false
125110	interacts with	CTNNB1 (interacts with) UGDH	false
125111	interacts with	CTNNB1 (interacts with) GALNT12	false
125112	interacts with	DCP1A (interacts with) STT3B	false
125113	interacts with	DCP1A (interacts with) SLC35D1	false
125114	interacts with	DDIT3 (interacts with) SLC35B1	false
125115	interacts with	DDX5 (interacts with) EXTL2	false
125116	interacts with	DEK (interacts with) ALG10	false
125117	interacts with	DEK (interacts with) STT3B	false
125118	interacts with	DEK (interacts with) ALG10B	false
125119	interacts with	DEK (interacts with) PIGK	false
125120	interacts with	DEK (interacts with) FPGT	false
125121	interacts with	DR1 (interacts with) FUT11	false
125122	interacts with	EBF1 (interacts with) ST3GAL2	false
125123	interacts with	EBF1 (interacts with) CHSY1	false
125124	interacts with	EBF1 (interacts with) HYAL1	false
125125	interacts with	EBF1 (interacts with) B4GALNT1	false
125126	interacts with	EBF1 (interacts with) MGAT5B	false
125127	interacts with	EBNA1BP2 (interacts with) DPM1	false
125128	interacts with	EGLN2 (interacts with) B3GALT4	false
125129	interacts with	EGLN2 (interacts with) B3GAT3	false
125130	interacts with	EGLN2 (interacts with) HYAL2	false
125131	interacts with	EGLN2 (interacts with) GALE	false
125132	interacts with	EHMT2 (interacts with) MAN1B1	false
125133	interacts with	EHMT2 (interacts with) COG4	false
125134	interacts with	ELF1 (interacts with) SLC35A5	false
125135	interacts with	ELF1 (interacts with) FUT11	false
125136	interacts with	ELF2 (interacts with) COG3	false
125137	interacts with	ELF2 (interacts with) ALG10B	false
125138	interacts with	ELF2 (interacts with) SLC35A5	false
125139	interacts with	ELK3 (interacts with) FUT11	false
125140	interacts with	EP400 (interacts with) FKTN	false
125141	interacts with	EP400 (interacts with) STT3B	false
125142	interacts with	EP400 (interacts with) OGT	false
125143	interacts with	EP400 (interacts with) ACER2	false
125144	interacts with	EP400 (interacts with) FUT11	false
125145	interacts with	EP400 (interacts with) GANAB	false
125146	interacts with	EP400 (interacts with) FUT10	false
125147	interacts with	EP400 (interacts with) PIGG	false
125148	interacts with	EP400 (interacts with) UGDH	false
125149	interacts with	EP400 (interacts with) GALC	false
125150	interacts with	ERCC6 (interacts with) MAN1A2	false
125151	interacts with	ERCC6 (interacts with) NDST2	false
125152	interacts with	ERCC6 (interacts with) ACER2	false
125153	interacts with	ERCC6 (interacts with) MAN2A1	false
125154	interacts with	ERCC6 (interacts with) COG6	false
125155	interacts with	ERCC6 (interacts with) UGCG	false
125156	interacts with	ERCC6 (interacts with) SLC35E1	false
125157	interacts with	ERCC6 (interacts with) SLC35A3	false
125158	interacts with	ERCC6 (interacts with) FUT10	false
125159	interacts with	ERCC6 (interacts with) UGDH	false
125160	interacts with	ERCC6 (interacts with) HS2ST1	false
125161	interacts with	ERCC6 (interacts with) GCNT1	false
125162	interacts with	ERF (interacts with) HYAL2	false
125163	interacts with	ERG (interacts with) MFNG	false
125164	interacts with	ERG (interacts with) GCNT2	false
125165	interacts with	ERG (interacts with) EXTL2	false
125166	interacts with	ERG (interacts with) MGAT5B	false
125167	interacts with	ERG (interacts with) ST3GAL6	false
125168	interacts with	ERG (interacts with) GALNT10	false
125169	interacts with	ERG (interacts with) B4GALNT1	false
125170	interacts with	ERG (interacts with) CHST14	false
125171	interacts with	ETS1 (interacts with) MFNG	false
125172	interacts with	ETS1 (interacts with) ST3GAL2	false
125173	interacts with	ETS1 (interacts with) MGAT4A	false
125174	interacts with	ETS1 (interacts with) HS3ST3B1	false
125175	interacts with	ETS1 (interacts with) ST8SIA6	false
125176	interacts with	ETS1 (interacts with) GLCE	false
125177	interacts with	ETS2 (interacts with) ST6GALNAC1	false
125178	interacts with	ETS2 (interacts with) HYAL1	false
125179	interacts with	ETV4 (interacts with) SLC35F2	false
125180	interacts with	ETV7 (interacts with) MAN2B1	false
125181	interacts with	ETV7 (interacts with) CTSA	false
125182	interacts with	EZH1 (interacts with) NDST2	false
125183	interacts with	FLI1 (interacts with) MFNG	false
125184	interacts with	FLI1 (interacts with) ST3GAL2	false
125185	interacts with	FLI1 (interacts with) CHSY1	false
125186	interacts with	FLI1 (interacts with) HS3ST3B1	false
125187	interacts with	FLI1 (interacts with) ST3GAL6	false
125188	interacts with	FLI1 (interacts with) ST6GALNAC1	false
125189	interacts with	FLI1 (interacts with) ST8SIA6	false
125190	interacts with	FOS (interacts with) EXT1	false
125191	interacts with	FOSL1 (interacts with) B3GNT3	false
125192	interacts with	FOSL1 (interacts with) B3GNT5	false
125193	interacts with	FOSL1 (interacts with) GALNT5	false
125194	interacts with	FOSL1 (interacts with) SULF2	false
125195	interacts with	FOSL1 (interacts with) FUT3	false
125196	interacts with	FOSL1 (interacts with) CHPF2	false
125197	interacts with	FOSL1 (interacts with) B4GALT5	false
125198	interacts with	FOSL1 (interacts with) HYAL2	false
125199	interacts with	FOXA2 (interacts with) CHST14	false
125200	interacts with	FOXA2 (interacts with) EXT1	false
125201	interacts with	FOXA2 (interacts with) HK1	false
125202	interacts with	FOXA2 (interacts with) GALNT10	false
125203	interacts with	FOXA2 (interacts with) B3GNT9	false
125204	interacts with	FOXO1 (interacts with) SULT1C4	false
125205	interacts with	FOXO1 (interacts with) UST	false
125206	interacts with	FOXO1 (interacts with) POFUT1	false
125207	interacts with	FOXO1 (interacts with) GANAB	false
125208	interacts with	FOXO1 (interacts with) GALNT10	false
125209	interacts with	FOXO1 (interacts with) TPST1	false
125210	interacts with	FOXO1 (interacts with) PIGK	false
125211	interacts with	FOXO1 (interacts with) GALC	false
125212	interacts with	FOXO1 (interacts with) B3GALNT2	false
125213	interacts with	FOXO1 (interacts with) STT3A	false
125214	interacts with	FOXO1 (interacts with) FPGT	false
125215	interacts with	FOXO1 (interacts with) B3GNT9	false
125216	interacts with	FOXO3 (interacts with) FUT11	false
125217	interacts with	FOXO3 (interacts with) UGCG	false
125218	interacts with	FOXO3 (interacts with) FKTN	false
125219	interacts with	FOXO3 (interacts with) NEU3	false
125220	interacts with	FOXP3 (interacts with) FUT7	false
125221	interacts with	FOXP3 (interacts with) ST8SIA4	false
125222	interacts with	FOXP3 (interacts with) HK3	false
125223	interacts with	FOXP3 (interacts with) LIPA	false
125224	interacts with	FOXP3 (interacts with) ST8SIA1	false
125225	interacts with	FOXP3 (interacts with) GBGT1	false
125226	interacts with	FOXP3 (interacts with) GAL3ST4	false
125227	interacts with	FOXP3 (interacts with) CSGALNACT2	false
125228	interacts with	FOXP3 (interacts with) ST6GALNAC5	false
125229	interacts with	FOXP3 (interacts with) LFNG	false
125230	interacts with	FOXP3 (interacts with) CTSA	false
125231	interacts with	FOXP3 (interacts with) FUT2	false
125232	interacts with	FOXP3 (interacts with) DSE	false
125233	interacts with	FOXP3 (interacts with) B4GALT5	false
125234	interacts with	FOXP3 (interacts with) GFPT2	false
125235	interacts with	FOXP3 (interacts with) HAS1	false
125236	interacts with	FOXP3 (interacts with) MAN1A1	false
125237	interacts with	FOXP3 (interacts with) SULF1	false
125238	interacts with	GABPA (interacts with) SLC35A5	false
125239	interacts with	GABPA (interacts with) ALG10B	false
125240	interacts with	GABPA (interacts with) FPGT	false
125241	interacts with	GABPA (interacts with) COG3	false
125242	interacts with	GABPA (interacts with) STT3B	false
125243	interacts with	GABPA (interacts with) EXTL2	false
125244	interacts with	GABPA (interacts with) PIGK	false
125245	interacts with	GABPA (interacts with) PIGN	false
125246	interacts with	GABPA (interacts with) COG5	false
125247	interacts with	GABPA (interacts with) B3GALNT2	false
125248	interacts with	GABPA (interacts with) GANAB	false
125249	interacts with	GABPA (interacts with) COG6	false
125250	interacts with	GABPA (interacts with) SLC35F5	false
125251	interacts with	GABPA (interacts with) PIGG	false
125252	interacts with	GATA2 (interacts with) ST3GAL2	false
125253	interacts with	GATA2 (interacts with) MFNG	false
125254	interacts with	GATA2 (interacts with) EXTL2	false
125255	interacts with	GATA2 (interacts with) HYAL1	false
125256	interacts with	GATA2 (interacts with) ST3GAL6	false
125257	interacts with	GATA2 (interacts with) SLC35B1	false
125258	interacts with	GATA2 (interacts with) B3GNT9	false
125259	interacts with	GATA3 (interacts with) MGAT3	false
125260	interacts with	GATAD1 (interacts with) PIGL	false
125261	interacts with	GATAD1 (interacts with) ALG13	false
125262	interacts with	GATAD1 (interacts with) POFUT2	false
125263	interacts with	GATAD1 (interacts with) COG3	false
125264	interacts with	GATAD1 (interacts with) COG1	false
125265	interacts with	GATAD1 (interacts with) COG7	false
125266	interacts with	GATAD1 (interacts with) MAN2A2	false
125267	interacts with	GATAD1 (interacts with) FPGT	false
125268	interacts with	GATAD1 (interacts with) PIGH	false
125269	interacts with	GATAD1 (interacts with) POMT2	false
125270	interacts with	GLI3 (interacts with) CHST14	false
125271	interacts with	GLIS3 (interacts with) RTF1	false
125272	interacts with	GLYR1 (interacts with) COG5	false
125273	interacts with	GLYR1 (interacts with) SLC35D1	false
125274	interacts with	GLYR1 (interacts with) PIGO	false
125275	interacts with	GLYR1 (interacts with) GANAB	false
125276	interacts with	GLYR1 (interacts with) PIGK	false
125277	interacts with	GMEB1 (interacts with) ALG10	false
125278	interacts with	GMEB2 (interacts with) GPAA1	false
125279	interacts with	GMEB2 (interacts with) PIGQ	false
125280	interacts with	GMEB2 (interacts with) SLC35A4	false
125281	interacts with	GRHL1 (interacts with) GALNT3	false
125282	interacts with	GRHL3 (interacts with) SULF2	false
125283	interacts with	GRHL3 (interacts with) PAPSS1	false
125284	interacts with	GTF2F1 (interacts with) RFNG	false
125285	interacts with	GTF2F1 (interacts with) B3GAT3	false
125286	interacts with	GTF2F1 (interacts with) MAN1B1	false
125287	interacts with	GTF2F1 (interacts with) DPM2	false
125288	interacts with	GTF2F1 (interacts with) ST6GALNAC6	false
125289	interacts with	GTF2I (interacts with) COG5	false
125290	interacts with	GTF2I (interacts with) UGGT1	false
125291	interacts with	GTF2I (interacts with) SLC35A3	false
125292	interacts with	GTF2I (interacts with) ALG10	false
125293	interacts with	GTF2I (interacts with) FUT11	false
125294	interacts with	GTF2I (interacts with) SLC35E3	false
125295	interacts with	GTF2I (interacts with) SLC35E1	false
125296	interacts with	GTF2I (interacts with) COG6	false
125297	interacts with	GTF2I (interacts with) GANAB	false
125298	interacts with	GTF2I (interacts with) ALG10B	false
125299	interacts with	GTF2I (interacts with) MGAT5	false
125300	interacts with	GTF2I (interacts with) POFUT1	false
125301	interacts with	GTF2I (interacts with) NEU3	false
125302	interacts with	GTF2I (interacts with) GNS	false
125303	interacts with	GTF2I (interacts with) COG3	false
125304	interacts with	GTF2I (interacts with) STT3A	false
125305	interacts with	GTF2I (interacts with) NDST1	false
125306	interacts with	GTF3C2 (interacts with) RTF1	false
125307	interacts with	GTF3C2 (interacts with) GANAB	false
125308	interacts with	GTF3C2 (interacts with) MAN2A2	false
125309	interacts with	HBP1 (interacts with) ALG10	false
125310	interacts with	HDAC1 (interacts with) SLC35B1	false
125311	interacts with	HDAC1 (interacts with) PIGH	false
125312	interacts with	HDAC1 (interacts with) B3GNT9	false
125313	interacts with	HDAC1 (interacts with) GALT	false
125314	interacts with	HDAC1 (interacts with) SULT1A2	false
125315	interacts with	HDAC1 (interacts with) ALG14	false
125316	interacts with	HDAC1 (interacts with) ST3GAL3	false
125317	interacts with	HDAC1 (interacts with) DPM2	false
125318	interacts with	HDAC1 (interacts with) ST6GALNAC6	false
125319	interacts with	HDAC1 (interacts with) PIGQ	false
125320	interacts with	HDAC1 (interacts with) GALNT11	false
125321	interacts with	HDAC1 (interacts with) POFUT2	false
125322	interacts with	HDAC1 (interacts with) ALG1	false
125323	interacts with	HDAC3 (interacts with) TPST1	false
125324	interacts with	HDAC3 (interacts with) POMT2	false
125325	interacts with	HDAC3 (interacts with) PIGO	false
125326	interacts with	HDAC6 (interacts with) OGT	false
125327	interacts with	HECTD1 (interacts with) FUT11	false
125328	interacts with	HECTD1 (interacts with) FAM20B	false
125329	interacts with	HES4 (interacts with) GALK1	false
125330	interacts with	HES4 (interacts with) TSTA3	false
125331	interacts with	HEXIM1 (interacts with) ST6GALNAC6	false
125332	interacts with	HEY1 (interacts with) CHST14	false
125333	interacts with	HEY1 (interacts with) MGAT5B	false
125334	interacts with	HEY1 (interacts with) B4GALNT1	false
125335	interacts with	HEY1 (interacts with) B3GNT9	false
125336	interacts with	HEY1 (interacts with) HYAL1	false
125337	interacts with	HEY1 (interacts with) B3GALNT2	false
125338	interacts with	HEYL (interacts with) B4GALNT1	false
125339	interacts with	HIF1A (interacts with) FUT11	false
125340	interacts with	HIF1A (interacts with) B4GALT5	false
125341	interacts with	HIF1A (interacts with) CHST15	false
125342	interacts with	HIF1A (interacts with) CSGALNACT2	false
125343	interacts with	HIF1A (interacts with) SLC35E1	false
125344	interacts with	HIF1A (interacts with) GLCE	false
125345	interacts with	HIF1A (interacts with) HPSE	false
125346	interacts with	HIF1A (interacts with) B3GNT3	false
125347	interacts with	HINFP (interacts with) MOGS	false
125348	interacts with	HMGN3 (interacts with) GALT	false
125349	interacts with	HSF1 (interacts with) TSTA3	false
125350	interacts with	HSF1 (interacts with) RFNG	false
125351	interacts with	HSF1 (interacts with) DPM2	false
125352	interacts with	HSF1 (interacts with) B3GAT3	false
125353	interacts with	HSF1 (interacts with) PIGQ	false
125354	interacts with	HSF1 (interacts with) SLC35C2	false
125355	interacts with	HSF1 (interacts with) DPM3	false
125356	interacts with	HSF1 (interacts with) B3GALT6	false
125357	interacts with	INO80 (interacts with) GANAB	false
125358	interacts with	IRF3 (interacts with) B3GAT3	false
125359	interacts with	IRF3 (interacts with) MOGS	false
125360	interacts with	IRF3 (interacts with) TSTA3	false
125361	interacts with	IRF3 (interacts with) B3GALT6	false
125362	interacts with	IRF3 (interacts with) B3GALT4	false
125363	interacts with	IRF5 (interacts with) HK3	false
125364	interacts with	IRF5 (interacts with) FUT7	false
125365	interacts with	IRF5 (interacts with) MAN2B1	false
125366	interacts with	IRF5 (interacts with) CTSA	false
125367	interacts with	IRF5 (interacts with) LFNG	false
125368	interacts with	IRF5 (interacts with) HPSE	false
125369	interacts with	IRF5 (interacts with) MGAT4B	false
125370	interacts with	IRF5 (interacts with) B3GNT3	false
125371	interacts with	IRF5 (interacts with) FUT3	false
125372	interacts with	IRF5 (interacts with) MGAT3	false
125373	interacts with	IRF5 (interacts with) CSGALNACT2	false
125374	interacts with	IRF5 (interacts with) FUT2	false
125375	interacts with	IRF5 (interacts with) FUT6	false
125376	interacts with	JMJD1C (interacts with) FUT11	false
125377	interacts with	JMJD1C (interacts with) STT3B	false
125378	interacts with	JMJD1C (interacts with) NEU3	false
125379	interacts with	JMJD1C (interacts with) FUT10	false
125380	interacts with	JMJD1C (interacts with) SLC35A5	false
125381	interacts with	KAT2B (interacts with) FPGT	false
125382	interacts with	KAT2B (interacts with) STT3B	false
125383	interacts with	KAT2B (interacts with) COG5	false
125384	interacts with	KAT2B (interacts with) SLC35D1	false
125385	interacts with	KAT2B (interacts with) B3GALNT2	false
125386	interacts with	KAT5 (interacts with) GALT	false
125387	interacts with	KAT5 (interacts with) ALG8	false
125388	interacts with	KAT5 (interacts with) ST3GAL3	false
125389	interacts with	KAT5 (interacts with) PIGH	false
125390	interacts with	KAT5 (interacts with) COG7	false
125391	interacts with	KAT5 (interacts with) DPM2	false
125392	interacts with	KAT5 (interacts with) ALG1	false
125393	interacts with	KDM3A (interacts with) FKTN	false
125394	interacts with	KDM4A (interacts with) GANAB	false
125395	interacts with	KDM4A (interacts with) PIGO	false
125396	interacts with	KDM4C (interacts with) FKTN	false
125397	interacts with	KDM4C (interacts with) MAN1A2	false
125398	interacts with	KDM4C (interacts with) COG3	false
125399	interacts with	KDM4C (interacts with) MAN2A2	false
125400	interacts with	KDM4C (interacts with) NEU3	false
125401	interacts with	KDM4C (interacts with) SLC35A5	false
125402	interacts with	KDM4C (interacts with) FPGT	false
125403	interacts with	KDM4C (interacts with) EXTL2	false
125404	interacts with	KDM4C (interacts with) B4GALT6	false
125405	interacts with	KDM5A (interacts with) ALG10	false
125406	interacts with	KDM5A (interacts with) NEU3	false
125407	interacts with	KDM5A (interacts with) ALG10B	false
125408	interacts with	KDM5A (interacts with) MAN2A1	false
125409	interacts with	KDM5A (interacts with) UGGT1	false
125410	interacts with	KDM5A (interacts with) SLC35A3	false
125411	interacts with	KDM5A (interacts with) FUT11	false
125412	interacts with	KDM5A (interacts with) SLC35F5	false
125413	interacts with	KDM5A (interacts with) GNS	false
125414	interacts with	KDM5A (interacts with) RTF1	false
125415	interacts with	KDM5A (interacts with) SLC35A5	false
125416	interacts with	KDM5A (interacts with) GANAB	false
125417	interacts with	KDM5A (interacts with) SLC35E1	false
125418	interacts with	KDM5C (interacts with) NEU3	false
125419	interacts with	KDM6B (interacts with) CHSY1	false
125420	interacts with	KDM6B (interacts with) PIGA	false
125421	interacts with	KLF10 (interacts with) FUT11	false
125422	interacts with	KLF15 (interacts with) UST	false
125423	interacts with	KLF5 (interacts with) B3GNT3	false
125424	interacts with	KLF5 (interacts with) HPSE	false
125425	interacts with	KLF5 (interacts with) B3GNT5	false
125426	interacts with	KLF5 (interacts with) GCNT4	false
125427	interacts with	KLF5 (interacts with) PAPSS1	false
125428	interacts with	KLF5 (interacts with) MGAT3	false
125429	interacts with	KLF5 (interacts with) B3GNT6	false
125430	interacts with	KLF5 (interacts with) B4GALT5	false
125431	interacts with	KLF5 (interacts with) PIGA	false
125432	interacts with	KLF5 (interacts with) B4GALT1	false
125433	interacts with	KLF5 (interacts with) GCNT1	false
125434	interacts with	KLF5 (interacts with) SULF2	false
125435	interacts with	KLF5 (interacts with) SLC17A5	false
125436	interacts with	LEF1 (interacts with) ST3GAL2	false
125437	interacts with	LMO2 (interacts with) MFNG	false
125438	interacts with	LMO2 (interacts with) HYAL1	false
125439	interacts with	LMO2 (interacts with) ST3GAL2	false
125440	interacts with	LMO2 (interacts with) SLC35B1	false
125441	interacts with	LMO2 (interacts with) GLA	false
125442	interacts with	LMO2 (interacts with) SULT1A3	false
125443	interacts with	LYL1 (interacts with) MFNG	false
125444	interacts with	LYL1 (interacts with) FUT7	false
125445	interacts with	LYL1 (interacts with) CHST12	false
125446	interacts with	LYL1 (interacts with) ST3GAL2	false
125447	interacts with	LYL1 (interacts with) IDUA	false
125448	interacts with	LYL1 (interacts with) LFNG	false
125449	interacts with	LYL1 (interacts with) B3GALT6	false
125450	interacts with	LYL1 (interacts with) SULT1A3	false
125451	interacts with	LYL1 (interacts with) GALK1	false
125452	interacts with	LYL1 (interacts with) HYAL1	false
125453	interacts with	LYL1 (interacts with) GLA	false
125454	interacts with	LYL1 (interacts with) A4GALT	false
125455	interacts with	LYL1 (interacts with) B4GALNT1	false
125456	interacts with	MAFB (interacts with) GALNT10	false
125457	interacts with	MAFF (interacts with) B3GNT5	false
125458	interacts with	MAFF (interacts with) HPSE	false
125459	interacts with	MAFF (interacts with) GALNT5	false
125460	interacts with	MAFF (interacts with) MGAT3	false
125461	interacts with	MAFF (interacts with) B3GNT6	false
125462	interacts with	MAFF (interacts with) B4GALT5	false
125463	interacts with	MAFF (interacts with) IDS	false
125464	interacts with	MAFF (interacts with) SLC35F2	false
125465	interacts with	MAFF (interacts with) PAPSS1	false
125466	interacts with	MAFF (interacts with) MGAT4B	false
125467	interacts with	MBD3 (interacts with) DPM2	false
125468	interacts with	MBD3 (interacts with) PIGQ	false
125469	interacts with	MBD3 (interacts with) B3GAT3	false
125470	interacts with	MBD3 (interacts with) RFNG	false
125471	interacts with	MBD3 (interacts with) B4GALT7	false
125472	interacts with	MBD3 (interacts with) DPM3	false
125473	interacts with	MBD3 (interacts with) GALK1	false
125474	interacts with	MBD3 (interacts with) GPAA1	false
125475	interacts with	MBD3 (interacts with) ALG3	false
125476	interacts with	MBD3 (interacts with) IDUA	false
125477	interacts with	MBD3 (interacts with) MAN1B1	false
125478	interacts with	MBD3 (interacts with) CHPF	false
125479	interacts with	MBD3 (interacts with) ALG12	false
125480	interacts with	MECP2 (interacts with) FKTN	false
125481	interacts with	MECP2 (interacts with) FUT11	false
125482	interacts with	MECP2 (interacts with) MAN2A2	false
125483	interacts with	MECP2 (interacts with) MAN1A2	false
125484	interacts with	MECP2 (interacts with) NEU3	false
125485	interacts with	MECP2 (interacts with) SLC35A5	false
125486	interacts with	MECP2 (interacts with) STT3B	false
125487	interacts with	MECP2 (interacts with) GANAB	false
125488	interacts with	MECP2 (interacts with) PIGO	false
125489	interacts with	MED12 (interacts with) NEU3	false
125490	interacts with	MED12 (interacts with) RTF1	false
125491	interacts with	MED12 (interacts with) GANAB	false
125492	interacts with	MED12 (interacts with) MAN2A2	false
125493	interacts with	MED12 (interacts with) NDST2	false
125494	interacts with	MED12 (interacts with) FUT11	false
125495	interacts with	MED12 (interacts with) NDST1	false
125496	interacts with	MEF2A (interacts with) MGAT5	false
125497	interacts with	MEF2A (interacts with) PIGK	false
125498	interacts with	MEF2A (interacts with) SLC35A5	false
125499	interacts with	MEF2A (interacts with) SLC35A3	false
125500	interacts with	MEF2A (interacts with) COG3	false
125501	interacts with	MEF2A (interacts with) FPGT	false
125502	interacts with	MEF2A (interacts with) GNE	false
125503	interacts with	MEF2A (interacts with) GALNT10	false
125504	interacts with	MEF2A (interacts with) FKTN	false
125505	interacts with	MEF2A (interacts with) COG5	false
125506	interacts with	MEF2A (interacts with) PIGN	false
125507	interacts with	MEF2A (interacts with) SLC35B4	false
125508	interacts with	MEF2A (interacts with) GALC	false
125509	interacts with	MEF2B (interacts with) SULT1A3	false
125510	interacts with	MEF2B (interacts with) GALK1	false
125511	interacts with	MEF2C (interacts with) ST3GAL2	false
125512	interacts with	MEF2C (interacts with) GALNT10	false
125513	interacts with	MEF2C (interacts with) MFNG	false
125514	interacts with	MEF2C (interacts with) MGAT5B	false
125515	interacts with	MEF2C (interacts with) UST	false
125516	interacts with	MEF2C (interacts with) GCNT2	false
125517	interacts with	MEF2C (interacts with) GALNT14	false
125518	interacts with	MEF2D (interacts with) FUT11	false
125519	interacts with	MITF (interacts with) SLC35A5	false
125520	interacts with	MITF (interacts with) SLC17A5	false
125521	interacts with	MLLT1 (interacts with) GALNT9	false
125522	interacts with	MNT (interacts with) UGDH	false
125523	interacts with	MSX1 (interacts with) ST3GAL2	false
125524	interacts with	MSX1 (interacts with) MFNG	false
125525	interacts with	MSX1 (interacts with) A4GALT	false
125526	interacts with	MXI1 (interacts with) PIGH	false
125527	interacts with	MYH11 (interacts with) B4GALNT1	false
125528	interacts with	MZF1 (interacts with) DPM3	false
125529	interacts with	MZF1 (interacts with) GPAA1	false
125530	interacts with	MZF1 (interacts with) B3GNT9	false
125531	interacts with	MZF1 (interacts with) DPM2	false
125532	interacts with	NFAT5 (interacts with) ACER2	false
125533	interacts with	NFE2 (interacts with) POFUT2	false
125534	interacts with	NFE2 (interacts with) GALT	false
125535	interacts with	NFE2 (interacts with) CHST5	false
125536	interacts with	NFE2 (interacts with) B4GALT7	false
125537	interacts with	NFE2 (interacts with) B3GNT9	false
125538	interacts with	NFE2 (interacts with) DPM2	false
125539	interacts with	NFE2 (interacts with) SLC35B1	false
125540	interacts with	NFE2 (interacts with) GAL3ST3	false
125541	interacts with	NFE2 (interacts with) GPAA1	false
125542	interacts with	NFE2 (interacts with) RPN1	false
125543	interacts with	NFIC (interacts with) MGAT5	false
125544	interacts with	NFIC (interacts with) FUT11	false
125545	interacts with	NFIC (interacts with) SLC35E1	false
125546	interacts with	NFIC (interacts with) NDST1	false
125547	interacts with	NFIC (interacts with) GANAB	false
125548	interacts with	NFIC (interacts with) PIGO	false
125549	interacts with	NFIC (interacts with) SLC35A3	false
125550	interacts with	NFIC (interacts with) FKTN	false
125551	interacts with	NFIC (interacts with) UGGT1	false
125552	interacts with	NFIC (interacts with) GNS	false
125553	interacts with	NFIC (interacts with) FUT10	false
125554	interacts with	NFYA (interacts with) STT3B	false
125555	interacts with	NFYA (interacts with) NEU3	false
125556	interacts with	NFYA (interacts with) PIGM	false
125557	interacts with	NFYA (interacts with) FAM20B	false
125558	interacts with	NFYA (interacts with) FUT11	false
125559	interacts with	NFYA (interacts with) PIGG	false
125560	interacts with	NFYA (interacts with) FUT10	false
125561	interacts with	NFYC (interacts with) DDOST	false
125562	interacts with	NFYC (interacts with) GALT	false
125563	interacts with	NFYC (interacts with) DPAGT1	false
125564	interacts with	NIPBL (interacts with) NEU3	false
125565	interacts with	NIPBL (interacts with) FUT11	false
125566	interacts with	NIPBL (interacts with) RTF1	false
125567	interacts with	NIPBL (interacts with) SLC35A5	false
125568	interacts with	NIPBL (interacts with) FUT10	false
125569	interacts with	NKX2-1 (interacts with) DPM2	false
125570	interacts with	NKX2-1 (interacts with) SGSH	false
125571	interacts with	NKX2-1 (interacts with) PIGQ	false
125572	interacts with	NKX2-1 (interacts with) GALT	false
125573	interacts with	NKX2-1 (interacts with) DPM3	false
125574	interacts with	NKX2-1 (interacts with) SLC35C2	false
125575	interacts with	NKX2-1 (interacts with) B3GNT9	false
125576	interacts with	NPAT (interacts with) FUT11	false
125577	interacts with	NR1D1 (interacts with) GALE	false
125578	interacts with	NR1H2 (interacts with) RFNG	false
125579	interacts with	NR1H2 (interacts with) DPM3	false
125580	interacts with	NR1H2 (interacts with) PIGQ	false
125581	interacts with	NR1H2 (interacts with) DPM2	false
125582	interacts with	NR1H2 (interacts with) B3GAT3	false
125583	interacts with	NR1H2 (interacts with) GALK1	false
125584	interacts with	NR1H2 (interacts with) B3GALT4	false
125585	interacts with	NR1H2 (interacts with) TSTA3	false
125586	interacts with	NR1H2 (interacts with) GALE	false
125587	interacts with	NR1H2 (interacts with) HYAL2	false
125588	interacts with	NR2C2 (interacts with) STT3B	false
125589	interacts with	NR2C2 (interacts with) FKTN	false
125590	interacts with	NR2C2 (interacts with) OGT	false
125591	interacts with	NR2C2 (interacts with) ALG10B	false
125592	interacts with	NR2C2 (interacts with) FUT11	false
125593	interacts with	NR2C2 (interacts with) FAM20B	false
125594	interacts with	NR2C2 (interacts with) COG3	false
125595	interacts with	NR2C2 (interacts with) SLC35D1	false
125596	interacts with	NR2C2 (interacts with) GNE	false
125597	interacts with	NR2C2 (interacts with) PIGG	false
125598	interacts with	NR2F6 (interacts with) TSTA3	false
125599	interacts with	NRF1 (interacts with) POMT1	false
125600	interacts with	NRF1 (interacts with) MAN2A2	false
125601	interacts with	NRF1 (interacts with) OGT	false
125602	interacts with	NRF1 (interacts with) POFUT2	false
125603	interacts with	NRF1 (interacts with) CHST10	false
125604	interacts with	OVOL2 (interacts with) MOGS	false
125605	interacts with	PBX1 (interacts with) MAN1A2	false
125606	interacts with	PBX1 (interacts with) GLCE	false
125607	interacts with	PBX1 (interacts with) GCNT4	false
125608	interacts with	PBX1 (interacts with) NEU3	false
125609	interacts with	PBX1 (interacts with) GALC	false
125610	interacts with	PBX1 (interacts with) SLC35A5	false
125611	interacts with	PBX1 (interacts with) STT3B	false
125612	interacts with	PBX1 (interacts with) UGDH	false
125613	interacts with	PBX1 (interacts with) GANAB	false
125614	interacts with	PBX1 (interacts with) NDST1	false
125615	interacts with	PBX1 (interacts with) SLC17A5	false
125616	interacts with	PBX1 (interacts with) UXS1	false
125617	interacts with	PCGF1 (interacts with) RFNG	false
125618	interacts with	PCGF1 (interacts with) TSTA3	false
125619	interacts with	PHF6 (interacts with) FAM20B	false
125620	interacts with	PHF8 (interacts with) ACER2	false
125621	interacts with	PHF8 (interacts with) NDST2	false
125622	interacts with	PHF8 (interacts with) GANAB	false
125623	interacts with	PHF8 (interacts with) FUT11	false
125624	interacts with	PHF8 (interacts with) UGDH	false
125625	interacts with	PHF8 (interacts with) UGCG	false
125626	interacts with	PIAS1 (interacts with) MGAT5	false
125627	interacts with	PIAS1 (interacts with) ACER2	false
125628	interacts with	PIAS1 (interacts with) UGCG	false
125629	interacts with	PIAS1 (interacts with) FUT11	false
125630	interacts with	PIAS1 (interacts with) ALG10	false
125631	interacts with	PIAS1 (interacts with) SLC35A3	false
125632	interacts with	PIAS1 (interacts with) FKTN	false
125633	interacts with	PIAS1 (interacts with) FUT10	false
125634	interacts with	PIAS1 (interacts with) COG5	false
125635	interacts with	PIAS1 (interacts with) GNE	false
125636	interacts with	PIAS1 (interacts with) PIGO	false
125637	interacts with	PIAS1 (interacts with) GANAB	false
125638	interacts with	PIAS1 (interacts with) POFUT1	false
125639	interacts with	PIAS1 (interacts with) PIGK	false
125640	interacts with	PIAS1 (interacts with) UGDH	false
125641	interacts with	PML (interacts with) FUT7	false
125642	interacts with	PML (interacts with) HK3	false
125643	interacts with	PML (interacts with) GAL3ST4	false
125644	interacts with	PML (interacts with) FUT2	false
125645	interacts with	PML (interacts with) MAN2B1	false
125646	interacts with	PML (interacts with) LFNG	false
125647	interacts with	PML (interacts with) HS3ST1	false
125648	interacts with	POLR3D (interacts with) ST6GALNAC5	false
125649	interacts with	POLR3D (interacts with) B3GNT3	false
125650	interacts with	POLR3D (interacts with) HPSE	false
125651	interacts with	POLR3D (interacts with) MGAT3	false
125652	interacts with	POLR3D (interacts with) FUT3	false
125653	interacts with	PPARA (interacts with) STT3B	false
125654	interacts with	PPARA (interacts with) MAN2A1	false
125655	interacts with	PPARGC1A (interacts with) HK1	false
125656	interacts with	PPARGC1A (interacts with) PIGO	false
125657	interacts with	PRDM4 (interacts with) MGAT5	false
125658	interacts with	PRDM4 (interacts with) ACER2	false
125659	interacts with	PSIP1 (interacts with) STT3B	false
125660	interacts with	RARA (interacts with) HYAL2	false
125661	interacts with	RARA (interacts with) CHST2	false
125662	interacts with	RARA (interacts with) B3GNT8	false
125663	interacts with	RARA (interacts with) GALE	false
125664	interacts with	RARA (interacts with) CHPF2	false
125665	interacts with	RARG (interacts with) B3GNT3	false
125666	interacts with	RARG (interacts with) MGAT4B	false
125667	interacts with	RARG (interacts with) FUT2	false
125668	interacts with	RARG (interacts with) MGAT3	false
125669	interacts with	RARG (interacts with) CHST15	false
125670	interacts with	RARG (interacts with) CSGALNACT2	false
125671	interacts with	RARG (interacts with) SULF2	false
125672	interacts with	RARG (interacts with) B3GNT6	false
125673	interacts with	RARG (interacts with) TSTA3	false
125674	interacts with	RARG (interacts with) HYAL2	false
125675	interacts with	RB1 (interacts with) COG6	false
125676	interacts with	RB1 (interacts with) COG3	false
125677	interacts with	RB1 (interacts with) STT3B	false
125678	interacts with	RB1 (interacts with) ALG10B	false
125679	interacts with	RB1 (interacts with) ALG10	false
125680	interacts with	RB1 (interacts with) SLC35A3	false
125681	interacts with	RB1 (interacts with) COG5	false
125682	interacts with	RB1 (interacts with) PIGK	false
125683	interacts with	RB1 (interacts with) SLC35F5	false
125684	interacts with	RB1 (interacts with) NEU3	false
125685	interacts with	RB1 (interacts with) UGGT1	false
125686	interacts with	RB1 (interacts with) FKTN	false
125687	interacts with	RB1 (interacts with) GNE	false
125688	interacts with	RB1 (interacts with) GNS	false
125689	interacts with	RB1 (interacts with) SLC35E3	false
125690	interacts with	RB1 (interacts with) COG2	false
125691	interacts with	RBBP5 (interacts with) MAN1A2	false
125692	interacts with	RBBP5 (interacts with) FAM20B	false
125693	interacts with	RBBP5 (interacts with) COG5	false
125694	interacts with	RBBP5 (interacts with) FUT11	false
125695	interacts with	RBBP5 (interacts with) ACER2	false
125696	interacts with	RBBP5 (interacts with) SLC35A3	false
125697	interacts with	RBBP5 (interacts with) SLC35E1	false
125698	interacts with	RBBP5 (interacts with) GANAB	false
125699	interacts with	RBBP5 (interacts with) PIGO	false
125700	interacts with	RBBP5 (interacts with) GNS	false
125701	interacts with	RBL2 (interacts with) ALG10B	false
125702	interacts with	RBL2 (interacts with) SLC35A5	false
125703	interacts with	RBL2 (interacts with) ALG10	false
125704	interacts with	RBL2 (interacts with) SLC35A3	false
125705	interacts with	RBL2 (interacts with) STT3B	false
125706	interacts with	RBL2 (interacts with) FPGT	false
125707	interacts with	RBL2 (interacts with) COG6	false
125708	interacts with	RBL2 (interacts with) SLC35D1	false
125709	interacts with	RBL2 (interacts with) PIGK	false
125710	interacts with	RBL2 (interacts with) GNE	false
125711	interacts with	RBL2 (interacts with) SLC35E3	false
125712	interacts with	RBL2 (interacts with) UGGT2	false
125713	interacts with	RBL2 (interacts with) PIGO	false
125714	interacts with	REST (interacts with) FUT11	false
125715	interacts with	RFX7 (interacts with) NEU3	false
125716	interacts with	RING1 (interacts with) RFNG	false
125717	interacts with	RING1 (interacts with) IDUA	false
125718	interacts with	RING1 (interacts with) B4GALT7	false
125719	interacts with	RING1 (interacts with) B3GALT6	false
125720	interacts with	RING1 (interacts with) POFUT2	false
125721	interacts with	RING1 (interacts with) DPM3	false
125722	interacts with	RING1 (interacts with) PIGQ	false
125723	interacts with	RING1 (interacts with) DPM2	false
125724	interacts with	RING1 (interacts with) COG4	false
125725	interacts with	RING1 (interacts with) B3GAT3	false
125726	interacts with	RING1 (interacts with) CHST5	false
125727	interacts with	RING1 (interacts with) GALT	false
125728	interacts with	RING1 (interacts with) MPI	false
125729	interacts with	RING1 (interacts with) SULT1A2	false
125730	interacts with	RORA (interacts with) MAN2A2	false
125731	interacts with	RUNX1 (interacts with) CHST15	false
125732	interacts with	RUNX1 (interacts with) CSGALNACT2	false
125733	interacts with	RUNX1 (interacts with) DSE	false
125734	interacts with	RUNX1 (interacts with) B4GALT1	false
125735	interacts with	RUNX1 (interacts with) B4GALT5	false
125736	interacts with	RUNX1 (interacts with) FUT2	false
125737	interacts with	RUNX1 (interacts with) B3GNT3	false
125738	interacts with	RUNX1 (interacts with) FUT7	false
125739	interacts with	RUNX1 (interacts with) MGAT3	false
125740	interacts with	RUNX1 (interacts with) B3GNT6	false
125741	interacts with	RUNX1 (interacts with) B3GNT5	false
125742	interacts with	RUNX1 (interacts with) MGAT4B	false
125743	interacts with	RUNX2 (interacts with) CHST15	false
125744	interacts with	RUNX2 (interacts with) GALE	false
125745	interacts with	RUNX2 (interacts with) B4GALT5	false
125746	interacts with	RXRA (interacts with) ALG12	false
125747	interacts with	RXRA (interacts with) SLC35A4	false
125748	interacts with	RXRG (interacts with) B3GALT4	false
125749	interacts with	RXRG (interacts with) ST6GALNAC6	false
125750	interacts with	RXRG (interacts with) GALNT12	false
125751	interacts with	RYBP (interacts with) GLCE	false
125752	interacts with	RYBP (interacts with) GCNT4	false
125753	interacts with	SATB1 (interacts with) MGAT5	false
125754	interacts with	SATB1 (interacts with) FUT11	false
125755	interacts with	SIN3A (interacts with) RTF1	false
125756	interacts with	SIN3A (interacts with) NEU3	false
125757	interacts with	SIN3A (interacts with) FUT11	false
125758	interacts with	SIN3A (interacts with) MAN1A2	false
125759	interacts with	SIN3A (interacts with) UGGT1	false
125760	interacts with	SIN3A (interacts with) GANAB	false
125761	interacts with	SIN3A (interacts with) GALC	false
125762	interacts with	SIN3A (interacts with) FUT10	false
125763	interacts with	SIRT6 (interacts with) B3GAT3	false
125764	interacts with	SIRT6 (interacts with) RFNG	false
125765	interacts with	SIRT6 (interacts with) TSTA3	false
125766	interacts with	SIRT6 (interacts with) B4GALT7	false
125767	interacts with	SIRT6 (interacts with) GALK1	false
125768	interacts with	SIRT6 (interacts with) ALG3	false
125769	interacts with	SIRT6 (interacts with) B3GALT6	false
125770	interacts with	SIRT6 (interacts with) GALE	false
125771	interacts with	SIRT6 (interacts with) B3GALT4	false
125772	interacts with	SIX5 (interacts with) PIGQ	false
125773	interacts with	SIX5 (interacts with) B3GALT6	false
125774	interacts with	SIX5 (interacts with) RFNG	false
125775	interacts with	SIX5 (interacts with) B3GAT3	false
125776	interacts with	SIX5 (interacts with) B4GALT7	false
125777	interacts with	SIX5 (interacts with) SGSH	false
125778	interacts with	SIX5 (interacts with) DPM3	false
125779	interacts with	SIX5 (interacts with) GPAA1	false
125780	interacts with	SIX5 (interacts with) POFUT2	false
125781	interacts with	SIX5 (interacts with) ALG12	false
125782	interacts with	SIX5 (interacts with) POMT1	false
125783	interacts with	SIX5 (interacts with) GALT	false
125784	interacts with	SIX5 (interacts with) DPM2	false
125785	interacts with	SIX5 (interacts with) GAL3ST3	false
125786	interacts with	SIX5 (interacts with) ALG3	false
125787	interacts with	SMAD2 (interacts with) ALG10B	false
125788	interacts with	SMAD2 (interacts with) NDST1	false
125789	interacts with	SMAD3 (interacts with) CHST15	false
125790	interacts with	SMAD3 (interacts with) MGAT3	false
125791	interacts with	SMAD4 (interacts with) SLC35D1	false
125792	interacts with	SMAD4 (interacts with) COG3	false
125793	interacts with	SMAD4 (interacts with) COG6	false
125794	interacts with	SMAD4 (interacts with) STT3B	false
125795	interacts with	SMAD4 (interacts with) FUT10	false
125796	interacts with	SMAD4 (interacts with) GANAB	false
125797	interacts with	SMAD4 (interacts with) PIGK	false
125798	interacts with	SMARCA4 (interacts with) MGAT4B	false
125799	interacts with	SMARCC1 (interacts with) FKTN	false
125800	interacts with	SMARCC1 (interacts with) RTF1	false
125801	interacts with	SMARCC1 (interacts with) ALG10	false
125802	interacts with	SMARCC1 (interacts with) UGGT1	false
125803	interacts with	SMARCC1 (interacts with) UGCG	false
125804	interacts with	SMARCC1 (interacts with) FAM20B	false
125805	interacts with	SMARCC1 (interacts with) HS2ST1	false
125806	interacts with	SMARCC1 (interacts with) NDST1	false
125807	interacts with	SMARCC1 (interacts with) SLC17A5	false
125808	interacts with	SMARCC1 (interacts with) ACER2	false
125809	interacts with	SMARCC2 (interacts with) OGT	false
125810	interacts with	SMC3 (interacts with) STT3B	false
125811	interacts with	SMC3 (interacts with) FUT11	false
125812	interacts with	SMC3 (interacts with) RTF1	false
125813	interacts with	SMC3 (interacts with) SLC35A3	false
125814	interacts with	SMC3 (interacts with) MAN2A1	false
125815	interacts with	SMC3 (interacts with) NEU3	false
125816	interacts with	SMC3 (interacts with) SLC35A5	false
125817	interacts with	SMC3 (interacts with) FAM20B	false
125818	interacts with	SMC3 (interacts with) UGCG	false
125819	interacts with	SMC3 (interacts with) GANAB	false
125820	interacts with	SMC3 (interacts with) FUT10	false
125821	interacts with	SMC3 (interacts with) PIGK	false
125822	interacts with	SMC3 (interacts with) SLC17A5	false
125823	interacts with	SP2 (interacts with) PIGO	false
125824	interacts with	SP2 (interacts with) MAN1A2	false
125825	interacts with	SP2 (interacts with) STT3B	false
125826	interacts with	SP2 (interacts with) GANAB	false
125827	interacts with	SP2 (interacts with) ALG10	false
125828	interacts with	SP2 (interacts with) UGGT1	false
125829	interacts with	SP2 (interacts with) PIGN	false
125830	interacts with	SP2 (interacts with) MAN2A2	false
125831	interacts with	SP2 (interacts with) POFUT1	false
125832	interacts with	SP2 (interacts with) PIGG	false
125833	interacts with	SP2 (interacts with) COG3	false
125834	interacts with	SP2 (interacts with) GALNT10	false
125835	interacts with	SP2 (interacts with) STT3A	false
125836	interacts with	SP2 (interacts with) GNS	false
125837	interacts with	SP2 (interacts with) UGT8	false
125838	interacts with	SP2 (interacts with) TPST1	false
125839	interacts with	SP4 (interacts with) GANAB	false
125840	interacts with	SRF (interacts with) EXT1	false
125841	interacts with	STAT1 (interacts with) HK3	false
125842	interacts with	STAT1 (interacts with) LIPA	false
125843	interacts with	STAT1 (interacts with) ST8SIA4	false
125844	interacts with	STAT1 (interacts with) HPSE	false
125845	interacts with	STAT1 (interacts with) GM2A	false
125846	interacts with	STAT1 (interacts with) DSE	false
125847	interacts with	STAT1 (interacts with) IDS	false
125848	interacts with	STAT1 (interacts with) CSGALNACT2	false
125849	interacts with	STAT1 (interacts with) UGCG	false
125850	interacts with	STAT1 (interacts with) MAN1A1	false
125851	interacts with	STAT1 (interacts with) CHST15	false
125852	interacts with	STAT1 (interacts with) B4GALT5	false
125853	interacts with	STAT1 (interacts with) B3GNT3	false
125854	interacts with	STAT1 (interacts with) MGAT3	false
125855	interacts with	STAT1 (interacts with) PAPSS1	false
125856	interacts with	STAT1 (interacts with) FUT7	false
125857	interacts with	STAT1 (interacts with) GNB1	false
125858	interacts with	STAT2 (interacts with) HK3	false
125859	interacts with	STAT2 (interacts with) DSE	false
125860	interacts with	STAT2 (interacts with) ST8SIA4	false
125861	interacts with	STAT2 (interacts with) CSGALNACT2	false
125862	interacts with	STAT2 (interacts with) FUT4	false
125863	interacts with	STAT2 (interacts with) HPSE	false
125864	interacts with	STAT2 (interacts with) SULF2	false
125865	interacts with	STAT2 (interacts with) B4GALT5	false
125866	interacts with	STAT2 (interacts with) MAN1A1	false
125867	interacts with	STAT2 (interacts with) LFNG	false
125868	interacts with	STAT2 (interacts with) UGCG	false
125869	interacts with	STAT2 (interacts with) B3GNT6	false
125870	interacts with	STAT2 (interacts with) CHPF2	false
125871	interacts with	STAT2 (interacts with) GLCE	false
125872	interacts with	STAT3 (interacts with) UGCG	false
125873	interacts with	STAT3 (interacts with) NEU3	false
125874	interacts with	STAT3 (interacts with) FUT11	false
125875	interacts with	STAT3 (interacts with) ACER2	false
125876	interacts with	STAT3 (interacts with) B4GALT5	false
125877	interacts with	STAT3 (interacts with) CSGALNACT2	false
125878	interacts with	STAT4 (interacts with) FUT7	false
125879	interacts with	STAT4 (interacts with) ST8SIA4	false
125880	interacts with	STAT4 (interacts with) MAN2B1	false
125881	interacts with	STAT4 (interacts with) GAL3ST4	false
125882	interacts with	STAT4 (interacts with) CSGALNACT2	false
125883	interacts with	STAT4 (interacts with) GALNT6	false
125884	interacts with	STAT4 (interacts with) B3GNT3	false
125885	interacts with	STAT4 (interacts with) HAS1	false
125886	interacts with	STAT4 (interacts with) FUT2	false
125887	interacts with	STAT4 (interacts with) LFNG	false
125888	interacts with	STAT4 (interacts with) B4GALT5	false
125889	interacts with	STAT5B (interacts with) MGAT5	false
125890	interacts with	STAT5B (interacts with) MAN2A2	false
125891	interacts with	STAT5B (interacts with) STT3B	false
125892	interacts with	STAT5B (interacts with) NDST2	false
125893	interacts with	STAT5B (interacts with) FUT11	false
125894	interacts with	STAT5B (interacts with) GALC	false
125895	interacts with	STAT6 (interacts with) OGT	false
125896	interacts with	STAT6 (interacts with) GALNT7	false
125897	interacts with	STAT6 (interacts with) SLC17A5	false
125898	interacts with	STAT6 (interacts with) MGAT4B	false
125899	interacts with	STAT6 (interacts with) CSGALNACT2	false
125900	interacts with	SUMO1 (interacts with) PIGY	false
125901	interacts with	SUMO1 (interacts with) DAD1	false
125902	interacts with	SUMO1 (interacts with) ALG5	false
125903	interacts with	SUMO1 (interacts with) DPM3	false
125904	interacts with	SUMO1 (interacts with) ALG14	false
125905	interacts with	SUMO1 (interacts with) DPM2	false
125906	interacts with	SUMO2 (interacts with) PIGC	false
125907	interacts with	SUMO2 (interacts with) DPM3	false
125908	interacts with	SUMO2 (interacts with) TSTA3	false
125909	interacts with	SUMO2 (interacts with) B3GALT6	false
125910	interacts with	SUMO2 (interacts with) GALE	false
125911	interacts with	SUMO2 (interacts with) B3GAT3	false
125912	interacts with	SUZ12 (interacts with) GNS	false
125913	interacts with	SVIL (interacts with) ACER2	false
125914	interacts with	SVIL (interacts with) B4GALT5	false
125915	interacts with	SVIL (interacts with) B4GALNT3	false
125916	interacts with	SVIL (interacts with) GALNT3	false
125917	interacts with	TAF1 (interacts with) NEU3	false
125918	interacts with	TAF1 (interacts with) FUT11	false
125919	interacts with	TAF1 (interacts with) FUT10	false
125920	interacts with	TAF1 (interacts with) PIGO	false
125921	interacts with	TAF3 (interacts with) FUT11	false
125922	interacts with	TAF3 (interacts with) GANAB	false
125923	interacts with	TAL1 (interacts with) EXTL2	false
125924	interacts with	TAL1 (interacts with) ST3GAL1	false
125925	interacts with	TAL1 (interacts with) SULT1C4	false
125926	interacts with	TAL1 (interacts with) HYAL1	false
125927	interacts with	TAL1 (interacts with) ST3GAL2	false
125928	interacts with	TAL1 (interacts with) ST3GAL6	false
125929	interacts with	TAL1 (interacts with) GCNT2	false
125930	interacts with	TAL1 (interacts with) HS6ST3	false
125931	interacts with	TAL1 (interacts with) MFNG	false
125932	interacts with	TAL1 (interacts with) TPST1	false
125933	interacts with	TBL1XR1 (interacts with) ALG10	false
125934	interacts with	TBL1XR1 (interacts with) ALG10B	false
125935	interacts with	TBL1XR1 (interacts with) FUT10	false
125936	interacts with	TBP (interacts with) COG3	false
125937	interacts with	TBP (interacts with) NDST2	false
125938	interacts with	TBP (interacts with) MAN2A2	false
125939	interacts with	TCF7L1 (interacts with) EXT1	false
125940	interacts with	TCF7L1 (interacts with) TPST1	false
125941	interacts with	TCF7L1 (interacts with) CHST14	false
125942	interacts with	TCF7L1 (interacts with) POMT1	false
125943	interacts with	TCF7L1 (interacts with) TPST2	false
125944	interacts with	TCF7L1 (interacts with) ST3GAL2	false
125945	interacts with	TCF7L1 (interacts with) NEU4	false
125946	interacts with	TCF7L1 (interacts with) B3GNT9	false
125947	interacts with	TCF7L1 (interacts with) POFUT2	false
125948	interacts with	TCF7L1 (interacts with) SLC35B1	false
125949	interacts with	TCF7L1 (interacts with) MGAT5B	false
125950	interacts with	TCF7L1 (interacts with) GALNT10	false
125951	interacts with	TCF7L1 (interacts with) DDOST	false
125952	interacts with	TCF7L1 (interacts with) GAL3ST3	false
125953	interacts with	TCF7L1 (interacts with) MGAT1	false
125954	interacts with	TCF7L1 (interacts with) HK1	false
125955	interacts with	TCF7L1 (interacts with) ST6GAL1	false
125956	interacts with	TCF7L1 (interacts with) UST	false
125957	interacts with	TCF7L1 (interacts with) ALG12	false
125958	interacts with	TCF7L1 (interacts with) DPAGT1	false
125959	interacts with	TCF7L2 (interacts with) EXTL2	false
125960	interacts with	TCF7L2 (interacts with) POFUT2	false
125961	interacts with	TEAD1 (interacts with) CSGALNACT2	false
125962	interacts with	TEAD1 (interacts with) UGCG	false
125963	interacts with	TEAD1 (interacts with) FUT11	false
125964	interacts with	TEAD1 (interacts with) CHST15	false
125965	interacts with	TEAD1 (interacts with) B4GALT5	false
125966	interacts with	TEAD1 (interacts with) PAPSS1	false
125967	interacts with	TET2 (interacts with) MAN1A2	false
125968	interacts with	TET2 (interacts with) STT3B	false
125969	interacts with	TET2 (interacts with) FUT11	false
125970	interacts with	TET2 (interacts with) ACER2	false
125971	interacts with	TET2 (interacts with) UGCG	false
125972	interacts with	TET2 (interacts with) NDST2	false
125973	interacts with	TET2 (interacts with) SLC35D1	false
125974	interacts with	TET2 (interacts with) GLCE	false
125975	interacts with	TET2 (interacts with) B3GAT2	false
125976	interacts with	TET2 (interacts with) ALG10	false
125977	interacts with	TET2 (interacts with) PIGG	false
125978	interacts with	TET2 (interacts with) SLC35A5	false
125979	interacts with	TFAP2C (interacts with) B3GNT3	false
125980	interacts with	TFAP2C (interacts with) SULF2	false
125981	interacts with	TFAP2C (interacts with) FUT2	false
125982	interacts with	TFAP2C (interacts with) B4GALT5	false
125983	interacts with	TFAP2C (interacts with) B4GALT1	false
125984	interacts with	TFAP2C (interacts with) FUT3	false
125985	interacts with	TFAP2C (interacts with) FUT6	false
125986	interacts with	TFAP2C (interacts with) MGAT3	false
125987	interacts with	TFAP2C (interacts with) MGAT4B	false
125988	interacts with	TFAP2C (interacts with) B3GNT6	false
125989	interacts with	TFAP2C (interacts with) B4GALNT3	false
125990	interacts with	TGIF1 (interacts with) B4GALT5	false
125991	interacts with	THAP1 (interacts with) COG5	false
125992	interacts with	TOP1 (interacts with) CHST15	false
125993	interacts with	TRIM28 (interacts with) GPAA1	false
125994	interacts with	TRIM28 (interacts with) B4GALT7	false
125995	interacts with	TRIM28 (interacts with) PIGQ	false
125996	interacts with	TRIM28 (interacts with) B3GAT3	false
125997	interacts with	TRIM28 (interacts with) XYLT2	false
125998	interacts with	TRIM28 (interacts with) DPM2	false
125999	interacts with	TRIM28 (interacts with) RFNG	false
126000	interacts with	TRIM28 (interacts with) MAN1B1	false
126001	interacts with	TRRAP (interacts with) FUT11	false
126002	interacts with	UBTF (interacts with) COG1	false
126003	interacts with	UBTF (interacts with) ALG1	false
126004	interacts with	UBTF (interacts with) B3GNT9	false
126005	interacts with	USF1 (interacts with) DPM3	false
126006	interacts with	USF1 (interacts with) TSTA3	false
126007	interacts with	USF1 (interacts with) NAGK	false
126008	interacts with	USF1 (interacts with) IDUA	false
126009	interacts with	USF1 (interacts with) GALK1	false
126010	interacts with	USF1 (interacts with) B3GAT3	false
126011	interacts with	USF1 (interacts with) SLC35C2	false
126012	interacts with	USF1 (interacts with) FUT7	false
126013	interacts with	USF1 (interacts with) B3GALT4	false
126014	interacts with	USF1 (interacts with) B3GALT6	false
126015	interacts with	USF2 (interacts with) DPM3	false
126016	interacts with	USF2 (interacts with) IDUA	false
126017	interacts with	USF2 (interacts with) B3GALT6	false
126018	interacts with	USF2 (interacts with) RFNG	false
126019	interacts with	USF2 (interacts with) GALK1	false
126020	interacts with	USF2 (interacts with) DPM2	false
126021	interacts with	USF2 (interacts with) CHST12	false
126022	interacts with	USF2 (interacts with) B3GAT3	false
126023	interacts with	USF2 (interacts with) GALT	false
126024	interacts with	VDR (interacts with) CHST6	false
126025	interacts with	VEZF1 (interacts with) ALG10B	false
126026	interacts with	VEZF1 (interacts with) ALG10	false
126027	interacts with	VEZF1 (interacts with) SLC35A5	false
126028	interacts with	VEZF1 (interacts with) UGCG	false
126029	interacts with	VEZF1 (interacts with) FKTN	false
126030	interacts with	VEZF1 (interacts with) GNS	false
126031	interacts with	VEZF1 (interacts with) COG6	false
126032	interacts with	VEZF1 (interacts with) GNE	false
126033	interacts with	VEZF1 (interacts with) UGGT1	false
126034	interacts with	VEZF1 (interacts with) GANAB	false
126035	interacts with	VEZF1 (interacts with) NDST2	false
126036	interacts with	VEZF1 (interacts with) UGDH	false
126037	interacts with	VEZF1 (interacts with) SLC17A5	false
126038	interacts with	XBP1 (interacts with) GMPPB	false
126039	interacts with	XBP1 (interacts with) STT3A	false
126040	interacts with	XBP1 (interacts with) GALK2	false
126041	interacts with	XBP1 (interacts with) MGAT1	false
126042	interacts with	XRN2 (interacts with) STT3B	false
126043	interacts with	XRN2 (interacts with) MAN2A1	false
126044	interacts with	XRN2 (interacts with) MAN1A2	false
126045	interacts with	XRN2 (interacts with) FUT11	false
126046	interacts with	XRN2 (interacts with) SLC35E1	false
126047	interacts with	XRN2 (interacts with) FUT10	false
126048	interacts with	XRN2 (interacts with) UGDH	false
126049	interacts with	XRN2 (interacts with) GNS	false
126050	interacts with	YAP1 (interacts with) STT3B	false
126051	interacts with	YAP1 (interacts with) FUT11	false
126052	interacts with	YAP1 (interacts with) SLC35A5	false
126053	interacts with	YAP1 (interacts with) GANAB	false
126054	interacts with	YAP1 (interacts with) CHST15	false
126055	interacts with	YAP1 (interacts with) FKTN	false
126056	interacts with	YAP1 (interacts with) CTBS	false
126057	interacts with	YAP1 (interacts with) UGDH	false
126058	interacts with	YAP1 (interacts with) NDST1	false
126059	interacts with	YY1 (interacts with) SLC35F5	false
126060	interacts with	YY1 (interacts with) PIGK	false
126061	interacts with	YY1 (interacts with) FKTN	false
126062	interacts with	YY1 (interacts with) CTBS	false
126063	interacts with	ZBTB10 (interacts with) ALG10	false
126064	interacts with	ZBTB17 (interacts with) RFNG	false
126065	interacts with	ZBTB17 (interacts with) B3GALT6	false
126066	interacts with	ZBTB17 (interacts with) PIGQ	false
126067	interacts with	ZBTB17 (interacts with) B3GAT3	false
126068	interacts with	ZBTB17 (interacts with) DPM3	false
126069	interacts with	ZBTB17 (interacts with) IDUA	false
126070	interacts with	ZBTB17 (interacts with) MOGS	false
126071	interacts with	ZBTB17 (interacts with) POMT1	false
126072	interacts with	ZBTB17 (interacts with) B4GALT7	false
126073	interacts with	ZBTB17 (interacts with) GALK1	false
126074	interacts with	ZBTB17 (interacts with) SLC35C2	false
126075	interacts with	ZBTB17 (interacts with) CHST12	false
126076	interacts with	ZBTB17 (interacts with) DPM2	false
126077	interacts with	ZBTB17 (interacts with) GMPPA	false
126078	interacts with	ZBTB17 (interacts with) ALG3	false
126079	interacts with	ZBTB2 (interacts with) POFUT1	false
126080	interacts with	ZBTB2 (interacts with) ALG2	false
126081	interacts with	ZBTB33 (interacts with) FKTN	false
126082	interacts with	ZBTB33 (interacts with) ALG10	false
126083	interacts with	ZBTB33 (interacts with) SLC35A5	false
126084	interacts with	ZBTB33 (interacts with) LAMP2	false
126085	interacts with	ZBTB33 (interacts with) FUT11	false
126086	interacts with	ZBTB33 (interacts with) NEU3	false
126087	interacts with	ZBTB33 (interacts with) UGDH	false
126088	interacts with	ZBTB33 (interacts with) IDS	false
126089	interacts with	ZBTB33 (interacts with) SLC17A5	false
