# Supplementary material for: A systems-based framework to computationally describe putative transcription factors and signaling pathways regulating glycan biosynthesis
Source: publisher site journal article supplement (doi:10.3762/bjoc.17.119), 2021-07-22
Supplement: Additional file 2 [file 1860-5397-17-119-S2.cys › CytoscapeSession-2021_03_21-12_01/tables/124859-THCA/LOCAL_ATTRS-org.cytoscape.model.CyNode-THCA+default+node.cytable]

CyCSV-Version	1
SUID	name	nodeType	selected
java.lang.Long	java.lang.String	java.lang.String	java.lang.Boolean
		mutable
THCA default node
105684	ADNP	TF	false
105685	FUT7	Glycogene	false
110787	AEBP2	TF	false
105731	FAM20B	Glycogene	false
105686	AFF4	TF	false
105687	MAN1A2	Glycogene	false
105688	STT3B	Glycogene	false
105689	NEU3	Glycogene	false
105690	FUT11	Glycogene	false
105691	ACER2	Glycogene	false
106844	SLC35E1	Glycogene	false
106836	AHR	TF	false
105985	UGCG	Glycogene	false
106858	GCNT4	Glycogene	false
106027	GALNT5	Glycogene	false
107999	B3GNT6	Glycogene	false
105699	ARID2	TF	false
105700	RTF1	Glycogene	false
105824	COG6	Glycogene	false
113211	ARNT	TF	false
107297	GNE	Glycogene	false
105923	NDST1	Glycogene	false
108552	GCNT1	Glycogene	false
105748	MAN2A2	Glycogene	false
112214	ARNTL	TF	false
107291	PAPSS1	Glycogene	false
105838	CHST2	Glycogene	false
107279	B4GALT5	Glycogene	false
107976	FUT8	Glycogene	false
108015	B4GALNT3	Glycogene	false
112223	B3GNT3	Glycogene	false
106859	GALNT7	Glycogene	false
105820	UAP1	Glycogene	false
105851	GLCE	Glycogene	false
105918	MGAT4B	Glycogene	false
108005	SLC17A5	Glycogene	false
105701	ATF1	TF	false
105702	SLC35A5	Glycogene	false
105695	SLC35A3	Glycogene	false
105703	GALNT4	Glycogene	false
107350	LAMP2	Glycogene	false
108551	UGDH	Glycogene	false
105966	UGGT2	Glycogene	false
105704	ATF2	TF	false
105694	MAN2A1	Glycogene	false
105696	SLC35F5	Glycogene	false
107278	FUT10	Glycogene	false
105998	GANAB	Glycogene	false
105874	PIGO	Glycogene	false
105710	ATF7IP	TF	false
105711	ALG10	Glycogene	false
105712	ATRX	TF	false
105713	FKTN	Glycogene	false
105714	BACH1	TF	false
105715	CSGALNACT2	Glycogene	false
105716	MAN1A1	Glycogene	false
105902	GNB1	Glycogene	false
105750	MGAT3	Glycogene	false
105723	BATF3	TF	false
105859	HK3	Glycogene	false
105834	ST8SIA4	Glycogene	false
105779	DSE	Glycogene	false
105725	BCAT1	TF	false
105707	B3GNT5	Glycogene	false
105810	FUT4	Glycogene	false
112215	BHLHE40	TF	false
106861	CHST15	Glycogene	false
107287	FUT2	Glycogene	false
106000	HPSE	Glycogene	false
107984	CTSA	Glycogene	false
107274	B4GALT1	Glycogene	false
105726	BMI1	TF	false
105727	ALG10B	Glycogene	false
106835	PIGK	Glycogene	false
106860	MGAT4A	Glycogene	false
107276	BRD2	TF	false
105823	COG3	Glycogene	false
107327	POFUT2	Glycogene	false
105692	COG5	Glycogene	false
106893	STT3A	Glycogene	false
109689	PIGG	Glycogene	false
105908	B3GALNT2	Glycogene	false
105976	FPGT	Glycogene	false
106869	GALC	Glycogene	false
105809	TPST1	Glycogene	false
105867	ALG1	Glycogene	false
107277	BRD3	TF	false
110789	BTAF1	TF	false
108578	PIGL	Glycogene	false
105736	C17orf49	TF	false
105754	B3GAT3	Glycogene	false
105880	TSTA3	Glycogene	false
106030	B3GALT4	Glycogene	false
107978	C17orf96	TF	false
108559	GALE	Glycogene	false
105738	CASP8AP2	TF	false
105772	NDST2	Glycogene	false
106845	CBFA2T3	TF	false
105806	ST3GAL2	Glycogene	false
105739	CBFB	TF	false
105869	CTBS	Glycogene	false
107979	SLC35F2	Glycogene	false
107989	ST6GALNAC5	Glycogene	false
106847	CBX6	TF	false
105705	UGGT1	Glycogene	false
105752	CBX8	TF	false
105798	SLC35B1	Glycogene	false
108018	CHST14	Glycogene	false
105782	B4GALT7	Glycogene	false
106851	GALT	Glycogene	false
108032	B3GNT9	Glycogene	false
105797	ALG3	Glycogene	false
105755	CCDC101	TF	false
111094	CD59	TF	false
105912	RENBP	Glycogene	false
105757	CDK9	TF	false
105758	DPM2	Glycogene	false
105744	RFNG	Glycogene	false
105781	B3GALT6	Glycogene	false
105737	HYAL2	Glycogene	false
105764	CEBPA	TF	false
105724	MGAT1	Glycogene	false
105766	MFNG	Glycogene	false
108026	GLA	Glycogene	false
108586	SLC35A4	Glycogene	false
105936	RPN1	Glycogene	false
107992	ALG14	Glycogene	false
105767	CEBPB	TF	false
105763	CHST12	Glycogene	false
105749	IDUA	Glycogene	false
105753	GALK1	Glycogene	false
105722	DPM3	Glycogene	false
105769	CHD1	TF	false
105771	OGT	Glycogene	false
105770	CHD2	TF	false
105774	CHD8	TF	false
105792	POFUT1	Glycogene	false
105775	CIITA	TF	false
105777	MAN2B1	Glycogene	false
105778	GAL3ST4	Glycogene	false
105979	SULF2	Glycogene	false
106849	CLOCK	TF	false
105780	CPSF3L	TF	false
107986	SLC35C2	Glycogene	false
106892	COG4	Glycogene	false
105881	GPAA1	Glycogene	false
105786	CREB3	TF	false
111095	CREB3L2	TF	false
105790	CREBBP	TF	false
105793	CTBP1	TF	false
111096	CTBP2	TF	false
105794	CTNNB1	TF	false
105812	GALNT12	Glycogene	false
106850	DCP1A	TF	false
105950	SLC35D1	Glycogene	false
110793	DDIT3	TF	false
112218	DDX5	TF	false
105844	EXTL2	Glycogene	false
105795	DEK	TF	false
108571	DR1	TF	false
105804	EBF1	TF	false
105717	CHSY1	Glycogene	false
105751	HYAL1	Glycogene	false
107990	B4GALNT1	Glycogene	false
108014	MGAT5B	Glycogene	false
108576	EBNA1BP2	TF	false
105799	DPM1	Glycogene	false
105813	EGLN2	TF	false
105821	EHMT2	TF	false
105760	MAN1B1	Glycogene	false
105822	ELF1	TF	false
105825	ELF2	TF	false
105826	ELK3	TF	false
105829	EP400	TF	false
105830	ERCC6	TF	false
105906	HS2ST1	Glycogene	false
105831	ERF	TF	false
105832	ERG	TF	false
107296	GCNT2	Glycogene	false
105811	ST3GAL6	Glycogene	false
105697	GALNT10	Glycogene	false
105839	ETS1	TF	false
105841	HS3ST3B1	Glycogene	false
105698	ST8SIA6	Glycogene	false
111098	ETS2	TF	false
105920	ST6GALNAC1	Glycogene	false
108581	ETV4	TF	false
118329	ETV7	TF	false
105846	EZH1	TF	false
105848	FLI1	TF	false
105849	FOS	TF	false
108580	EXT1	Glycogene	false
107294	FOSL1	TF	false
107289	FUT3	Glycogene	false
108007	CHPF2	Glycogene	false
116606	FOXA2	TF	false
107293	HK1	Glycogene	false
105856	FOXO1	TF	false
105837	SULT1C4	Glycogene	false
105836	UST	Glycogene	false
108587	FOXO3	TF	false
105858	FOXP3	TF	false
105884	LIPA	Glycogene	false
105840	ST8SIA1	Glycogene	false
105897	GBGT1	Glycogene	false
106846	LFNG	Glycogene	false
105719	GFPT2	Glycogene	false
105708	HAS1	Glycogene	false
106883	SULF1	Glycogene	false
105861	GABPA	TF	false
105730	PIGN	Glycogene	false
111100	GATA2	TF	false
109677	GATA3	TF	false
105863	GATAD1	TF	false
105864	ALG13	Glycogene	false
106005	COG1	Glycogene	false
105791	COG7	Glycogene	false
105852	PIGH	Glycogene	false
108023	POMT2	Glycogene	false
114937	GLI3	TF	false
112220	GLIS3	TF	false
105866	GLYR1	TF	false
120757	GMEB1	TF	false
108589	GMEB2	TF	false
105759	PIGQ	Glycogene	false
106866	GRHL1	TF	false
108000	GALNT3	Glycogene	false
114938	GRHL3	TF	false
105870	GTF2F1	TF	false
105746	ST6GALNAC6	Glycogene	false
105871	GTF2I	TF	false
105732	SLC35E3	Glycogene	false
105893	MGAT5	Glycogene	false
105905	GNS	Glycogene	false
107302	GTF3C2	TF	false
108591	HBP1	TF	false
107303	HDAC1	TF	false
117555	SULT1A2	Glycogene	false
105747	ST3GAL3	Glycogene	false
107974	GALNT11	Glycogene	false
107304	HDAC3	TF	false
108593	HDAC6	TF	false
105875	HECTD1	TF	false
105876	HES4	TF	false
112221	HEXIM1	TF	false
109679	HEY1	TF	false
107993	HEYL	TF	false
106867	HIF1A	TF	false
105877	HINFP	TF	false
105762	MOGS	Glycogene	false
111102	HMGN3	TF	false
105879	HSF1	TF	false
105885	INO80	TF	false
106872	IRF3	TF	false
105889	IRF5	TF	false
107288	FUT6	Glycogene	false
105892	JMJD1C	TF	false
107312	KAT2B	TF	false
105900	KAT5	TF	false
107286	ALG8	Glycogene	false
105903	KDM3A	TF	false
106874	KDM4A	TF	false
107997	KDM4C	TF	false
107331	B4GALT6	Glycogene	false
105904	KDM5A	TF	false
107314	KDM5C	TF	false
107315	KDM6B	TF	false
108027	PIGA	Glycogene	false
111106	KLF10	TF	false
108597	KLF15	TF	false
107318	KLF5	TF	false
106875	LEF1	TF	false
105909	LMO2	TF	false
108594	SULT1A3	Glycogene	false
105911	LYL1	TF	false
105768	A4GALT	Glycogene	false
105914	MAFB	TF	false
108598	MAFF	TF	false
105922	IDS	Glycogene	false
107323	MBD3	TF	false
108583	CHPF	Glycogene	false
105734	ALG12	Glycogene	false
105921	MECP2	TF	false
107324	MED12	TF	false
105925	MEF2A	TF	false
105845	SLC35B4	Glycogene	false
106877	MEF2B	TF	false
105926	MEF2C	TF	false
113215	GALNT14	Glycogene	false
107325	MEF2D	TF	false
105929	MITF	TF	false
108601	MLLT1	TF	false
108605	GALNT9	Glycogene	false
110801	MNT	TF	false
105932	MSX1	TF	false
111108	MXI1	TF	false
105937	MYH11	TF	false
105942	MZF1	TF	false
105943	NFAT5	TF	false
113229	NFE2	TF	false
108612	CHST5	Glycogene	false
108590	GAL3ST3	Glycogene	false
105945	NFIC	TF	false
107329	NFYA	TF	false
105954	PIGM	Glycogene	false
105946	NFYC	TF	false
108555	DDOST	Glycogene	false
105878	DPAGT1	Glycogene	false
105947	NIPBL	TF	false
116995	NKX2-1	TF	false
110804	SGSH	Glycogene	false
105948	NPAT	TF	false
114946	NR1D1	TF	false
109685	NR1H2	TF	false
105949	NR2C2	TF	false
117859	NR2F6	TF	false
107333	NRF1	TF	false
105761	POMT1	Glycogene	false
108013	CHST10	Glycogene	false
118336	OVOL2	TF	false
105953	PBX1	TF	false
109669	UXS1	Glycogene	false
105955	PCGF1	TF	false
105957	PHF6	TF	false
107334	PHF8	TF	false
105958	PIAS1	TF	false
107336	PML	TF	false
105910	HS3ST1	Glycogene	false
108609	POLR3D	TF	false
106881	PPARA	TF	false
110809	PPARGC1A	TF	false
108021	PRDM4	TF	false
110810	PSIP1	TF	false
106884	RARA	TF	false
107983	B3GNT8	Glycogene	false
118337	RARG	TF	false
105965	RB1	TF	false
105973	COG2	Glycogene	false
105967	RBBP5	TF	false
105968	RBL2	TF	false
105970	REST	TF	false
105974	RFX7	TF	false
108613	RING1	TF	false
107340	MPI	Glycogene	false
105977	RORA	TF	false
105978	RUNX1	TF	false
105981	RUNX2	TF	false
105983	RXRA	TF	false
118338	RXRG	TF	false
107338	RYBP	TF	false
108614	SATB1	TF	false
105984	SIN3A	TF	false
106885	SIRT6	TF	false
105986	SIX5	TF	false
106886	SMAD2	TF	false
107342	SMAD3	TF	false
105987	SMAD4	TF	false
107343	SMARCA4	TF	false
107344	SMARCC1	TF	false
105988	SMARCC2	TF	false
105990	SMC3	TF	false
107346	SP2	TF	false
106842	UGT8	Glycogene	false
110813	SP4	TF	false
105996	SRF	TF	false
105999	STAT1	TF	false
105883	GM2A	Glycogene	false
106001	STAT2	TF	false
107347	STAT3	TF	false
106002	STAT4	TF	false
108561	GALNT6	Glycogene	false
108029	STAT5B	TF	false
107348	STAT6	TF	false
112231	SUMO1	TF	false
107332	PIGY	Glycogene	false
108008	DAD1	Glycogene	false
106012	ALG5	Glycogene	false
106004	SUMO2	TF	false
108558	PIGC	Glycogene	false
118044	SUZ12	TF	false
107349	SVIL	TF	false
106006	TAF1	TF	false
107351	TAF3	TF	false
108624	TAL1	TF	false
108579	ST3GAL1	Glycogene	false
114930	HS6ST3	Glycogene	false
111114	TBL1XR1	TF	false
108030	TBP	TF	false
106009	TCF7L1	TF	false
106840	TPST2	Glycogene	false
113217	NEU4	Glycogene	false
106855	ST6GAL1	Glycogene	false
106010	TCF7L2	TF	false
106013	TEAD1	TF	false
106016	TET2	TF	false
108606	B3GAT2	Glycogene	false
107354	TFAP2C	TF	false
109691	TGIF1	TF	false
108626	THAP1	TF	false
110814	TOP1	TF	false
106018	TRIM28	TF	false
109684	XYLT2	Glycogene	false
108628	TRRAP	TF	false
106020	UBTF	TF	false
106021	USF1	TF	false
105765	NAGK	Glycogene	false
106022	USF2	TF	false
107356	VDR	TF	false
105930	CHST6	Glycogene	false
106023	VEZF1	TF	false
108037	XBP1	TF	false
108038	GMPPB	Glycogene	false
110806	GALK2	Glycogene	false
106025	XRN2	TF	false
106026	YAP1	TF	false
106028	YY1	TF	false
106894	ZBTB10	TF	false
106029	ZBTB17	TF	false
105787	GMPPA	Glycogene	false
108039	ZBTB2	TF	false
109671	ALG2	Glycogene	false
106031	ZBTB33	TF	false
