# Supplementary material for: A systems-based framework to computationally describe putative transcription factors and signaling pathways regulating glycan biosynthesis
Source: publisher site journal article supplement (doi:10.3762/bjoc.17.119), 2021-07-22
Supplement: Additional file 2 [file 1860-5397-17-119-S2.cys › CytoscapeSession-2021_03_21-12_01/tables/126090-THYM/LOCAL_ATTRS-org.cytoscape.model.CyNode-THYM+default+node.cytable]

CyCSV-Version	1
SUID	name	nodeType	selected
java.lang.Long	java.lang.String	java.lang.String	java.lang.Boolean
		mutable
THYM default node
105699	ARID2	TF	false
105700	RTF1	Glycogene	false
105732	SLC35E3	Glycogene	false
107970	ARID3A	TF	false
106838	B3GNT2	Glycogene	false
106837	ASCL2	TF	false
108003	GCNT3	Glycogene	false
107273	ASH2L	TF	false
105973	COG2	Glycogene	false
105701	ATF1	TF	false
105702	SLC35A5	Glycogene	false
105688	STT3B	Glycogene	false
105695	SLC35A3	Glycogene	false
105690	FUT11	Glycogene	false
105694	MAN2A1	Glycogene	false
105689	NEU3	Glycogene	false
106868	MGAT2	Glycogene	false
105716	MAN1A1	Glycogene	false
105998	GANAB	Glycogene	false
105823	COG3	Glycogene	false
105902	GNB1	Glycogene	false
110806	GALK2	Glycogene	false
105704	ATF2	TF	false
105687	MAN1A2	Glycogene	false
105691	ACER2	Glycogene	false
107278	FUT10	Glycogene	false
108551	UGDH	Glycogene	false
105712	ATRX	TF	false
107973	AUTS2	TF	false
107327	POFUT2	Glycogene	false
105966	UGGT2	Glycogene	false
118335	MANBA	Glycogene	false
107307	EXT2	Glycogene	false
108553	BACH2	TF	false
106858	GCNT4	Glycogene	false
105718	CHST11	Glycogene	false
105834	ST8SIA4	Glycogene	false
108579	ST3GAL1	Glycogene	false
106855	ST6GAL1	Glycogene	false
105715	CSGALNACT2	Glycogene	false
105721	BATF	TF	false
105685	FUT7	Glycogene	false
105725	BCAT1	TF	false
105806	ST3GAL2	Glycogene	false
107275	BCL6	TF	false
126100	BCLAF1	TF	false
110788	BCOR	TF	false
105726	BMI1	TF	false
105727	ALG10B	Glycogene	false
105731	FAM20B	Glycogene	false
105711	ALG10	Glycogene	false
105703	GALNT4	Glycogene	false
105985	UGCG	Glycogene	false
105845	SLC35B4	Glycogene	false
106882	GFPT1	Glycogene	false
105851	GLCE	Glycogene	false
108580	EXT1	Glycogene	false
108000	GALNT3	Glycogene	false
106893	STT3A	Glycogene	false
106869	GALC	Glycogene	false
105843	ARSB	Glycogene	false
105779	DSE	Glycogene	false
105750	MGAT3	Glycogene	false
105939	CHST9	Glycogene	false
105728	BRCA1	TF	false
107980	PIGX	Glycogene	false
105772	NDST2	Glycogene	false
105733	BRD1	TF	false
105717	CHSY1	Glycogene	false
107291	PAPSS1	Glycogene	false
111090	PIGV	Glycogene	false
105740	GALNS	Glycogene	false
105696	SLC35F5	Glycogene	false
109671	ALG2	Glycogene	false
107276	BRD2	TF	false
105896	FKRP	Glycogene	false
105869	CTBS	Glycogene	false
108001	SLC35A1	Glycogene	false
108005	SLC17A5	Glycogene	false
105810	FUT4	Glycogene	false
106835	PIGK	Glycogene	false
107277	BRD3	TF	false
105705	UGGT1	Glycogene	false
105950	SLC35D1	Glycogene	false
106843	BRD4	TF	false
107977	BRD7	TF	false
106879	ALG6	Glycogene	false
110789	BTAF1	TF	false
111093	CAMTA2	TF	false
105697	GALNT10	Glycogene	false
105738	CASP8AP2	TF	false
105739	CBFB	TF	false
106859	GALNT7	Glycogene	false
107297	GNE	Glycogene	false
106860	MGAT4A	Glycogene	false
105741	CBX3	TF	false
108584	UGP2	Glycogene	false
126101	LCT	Glycogene	false
105778	GAL3ST4	Glycogene	false
106847	CBX6	TF	false
106891	COG8	Glycogene	false
105745	CBX7	TF	false
106853	MAN1C1	Glycogene	false
106844	SLC35E1	Glycogene	false
107290	ASAH1	Glycogene	false
108567	NAGA	Glycogene	false
105752	CBX8	TF	false
111094	CD59	TF	false
118328	CDK7	TF	false
108558	PIGC	Glycogene	false
105756	CDK8	TF	false
105906	HS2ST1	Glycogene	false
105730	PIGN	Glycogene	false
105757	CDK9	TF	false
105880	TSTA3	Glycogene	false
108563	CEBPD	TF	false
105737	HYAL2	Glycogene	false
107984	CTSA	Glycogene	false
110791	CEBPG	TF	false
105855	GNPNAT1	Glycogene	false
108564	CEBPZ	TF	false
105769	CHD1	TF	false
114932	NDST3	Glycogene	false
114944	AGA	Glycogene	false
106857	ST3GAL5	Glycogene	false
105770	CHD2	TF	false
126102	CHD3	TF	false
105773	CHD4	TF	false
105774	CHD8	TF	false
105692	COG5	Glycogene	false
105874	PIGO	Glycogene	false
105771	OGT	Glycogene	false
107976	FUT8	Glycogene	false
109689	PIGG	Glycogene	false
105780	CPSF3L	TF	false
105754	B3GAT3	Glycogene	false
105786	CREB3	TF	false
105787	GMPPA	Glycogene	false
105790	CREBBP	TF	false
126103	CREM	TF	false
105799	DPM1	Glycogene	false
113221	CHST4	Glycogene	false
105793	CTBP1	TF	false
105794	CTNNB1	TF	false
107279	B4GALT5	Glycogene	false
106854	XYLT1	Glycogene	false
105905	GNS	Glycogene	false
106861	CHST15	Glycogene	false
108585	HEXB	Glycogene	false
108552	GCNT1	Glycogene	false
108569	DAXX	TF	false
106850	DCP1A	TF	false
110793	DDIT3	TF	false
109680	NAGLU	Glycogene	false
105795	DEK	TF	false
123850	DLX4	TF	false
108590	GAL3ST3	Glycogene	false
107282	DNMT3A	TF	false
108571	DR1	TF	false
120755	DYRK1A	TF	false
105796	E2F1	TF	false
105753	GALK1	Glycogene	false
108573	E2F2	TF	false
107987	E2F4	TF	false
105801	E2F6	TF	false
108557	PIGF	Glycogene	false
107305	GNPDA1	Glycogene	false
108018	CHST14	Glycogene	false
109669	UXS1	Glycogene	false
112227	B4GALT4	Glycogene	false
107974	GALNT11	Glycogene	false
108023	POMT2	Glycogene	false
105922	IDS	Glycogene	false
105803	E2F7	TF	false
105813	EGLN2	TF	false
106030	B3GALT4	Glycogene	false
105797	ALG3	Glycogene	false
105816	EGR2	TF	false
105822	ELF1	TF	false
107281	SLC35B3	Glycogene	false
105825	ELF2	TF	false
105828	ELL	TF	false
105829	EP400	TF	false
105713	FKTN	Glycogene	false
105844	EXTL2	Glycogene	false
107292	ERCC3	TF	false
105830	ERCC6	TF	false
105824	COG6	Glycogene	false
105748	MAN2A2	Glycogene	false
105832	ERG	TF	false
105815	ST6GALNAC3	Glycogene	false
105839	ETS1	TF	false
111098	ETS2	TF	false
118329	ETV7	TF	false
105789	B4GALT3	Glycogene	false
113220	HYAL3	Glycogene	false
112226	UGT1A6	Glycogene	false
105846	EZH1	TF	false
108582	EZH2	TF	false
108561	GALNT6	Glycogene	false
105848	FLI1	TF	false
107298	FOXK1	TF	false
105923	NDST1	Glycogene	false
106005	COG1	Glycogene	false
105918	MGAT4B	Glycogene	false
105976	FPGT	Glycogene	false
105853	FOXM1	TF	false
105838	CHST2	Glycogene	false
105856	FOXO1	TF	false
105792	POFUT1	Glycogene	false
109675	GLB1	Glycogene	false
107274	B4GALT1	Glycogene	false
113218	FOXP1	TF	false
118330	FOXQ1	TF	false
106862	FUS	TF	false
105861	GABPA	TF	false
105742	CMAS	Glycogene	false
109677	GATA3	TF	false
105863	GATAD1	TF	false
112225	ST6GALNAC2	Glycogene	false
105866	GLYR1	TF	false
120757	GMEB1	TF	false
106865	GPS2	TF	false
106866	GRHL1	TF	false
105707	B3GNT5	Glycogene	false
112230	ARSD	Glycogene	false
107301	GRHL2	TF	false
106000	HPSE	Glycogene	false
114938	GRHL3	TF	false
105765	NAGK	Glycogene	false
105871	GTF2I	TF	false
105893	MGAT5	Glycogene	false
105820	UAP1	Glycogene	false
110795	GTF3C1	TF	false
107335	SLC35A2	Glycogene	false
107302	GTF3C2	TF	false
105872	H2AFX	TF	false
108002	NANS	Glycogene	false
105873	HCFC1	TF	false
107300	ALG11	Glycogene	false
108038	GMPPB	Glycogene	false
107303	HDAC1	TF	false
108592	HDAC2	TF	false
107304	HDAC3	TF	false
111101	HES1	TF	false
107981	LAMP1	Glycogene	false
112216	HEXA	Glycogene	false
105876	HES4	TF	false
112221	HEXIM1	TF	false
107319	ABO	Glycogene	false
109679	HEY1	TF	false
105768	A4GALT	Glycogene	false
126104	HS6ST2	Glycogene	false
107993	HEYL	TF	false
108583	CHPF	Glycogene	false
105809	TPST1	Glycogene	false
105877	HINFP	TF	false
106012	ALG5	Glycogene	false
108595	HIRA	TF	false
126105	HIST1H1B	TF	false
118333	HOXA4	TF	false
105897	GBGT1	Glycogene	false
105882	IKZF1	TF	false
105766	MFNG	Glycogene	false
105811	ST3GAL6	Glycogene	false
113224	ING5	TF	false
105885	INO80	TF	false
105886	INTS3	TF	false
106871	IRF2	TF	false
106872	IRF3	TF	false
108026	GLA	Glycogene	false
105890	IRF8	TF	false
105859	HK3	Glycogene	false
107310	NAAA	Glycogene	false
106840	TPST2	Glycogene	false
118334	ISL1	TF	false
107311	JARID2	TF	false
107331	B4GALT6	Glycogene	false
105891	JDP2	TF	false
105892	JMJD1C	TF	false
107312	KAT2B	TF	false
105901	KDM1A	TF	false
107313	KDM2B	TF	false
105903	KDM3A	TF	false
105864	ALG13	Glycogene	false
106874	KDM4A	TF	false
107997	KDM4C	TF	false
105904	KDM5A	TF	false
107314	KDM5C	TF	false
107315	KDM6B	TF	false
111106	KLF10	TF	false
108597	KLF15	TF	false
105979	SULF2	Glycogene	false
107318	KLF5	TF	false
112224	L3MBTL2	TF	false
110798	LARP7	TF	false
107320	LDB1	TF	false
106875	LEF1	TF	false
107321	LIN9	TF	false
109681	LMNB1	TF	false
105911	LYL1	TF	false
105777	MAN2B1	Glycogene	false
105914	MAFB	TF	false
108006	MAFK	TF	false
105916	MAZ	TF	false
107323	MBD3	TF	false
105758	DPM2	Glycogene	false
105722	DPM3	Glycogene	false
105735	PMM1	Glycogene	false
108599	MBD4	TF	false
105921	MECP2	TF	false
105941	HAS3	Glycogene	false
105924	MED1	TF	false
107324	MED12	TF	false
108578	PIGL	Glycogene	false
105925	MEF2A	TF	false
105926	MEF2C	TF	false
107325	MEF2D	TF	false
105928	MEIS1	TF	false
111115	B3GALNT1	Glycogene	false
110804	SGSH	Glycogene	false
108601	MLLT1	TF	false
110800	MLLT3	TF	false
110801	MNT	TF	false
105931	MRE11A	TF	false
109683	MXD1	TF	false
113228	MYB	TF	false
105934	MYBL1	TF	false
105935	MYBL2	TF	false
108009	MYC	TF	false
105942	MZF1	TF	false
105734	ALG12	Glycogene	false
117858	NCAPG2	TF	false
108603	NCOR1	TF	false
107326	NCOR2	TF	false
126106	NFATC3	TF	false
126107	NFIB	TF	false
107329	NFYA	TF	false
107330	NFYB	TF	false
105947	NIPBL	TF	false
110803	NME2	TF	false
105948	NPAT	TF	false
114946	NR1D1	TF	false
110807	NR1H3	TF	false
105881	GPAA1	Glycogene	false
105949	NR2C2	TF	false
107333	NRF1	TF	false
112228	PALB2	TF	false
105953	PBX1	TF	false
105807	CHST3	Glycogene	false
126108	PBX2	TF	false
105955	PCGF1	TF	false
105744	RFNG	Glycogene	false
105956	PHF20	TF	false
105957	PHF6	TF	false
107334	PHF8	TF	false
105958	PIAS1	TF	false
105959	POLR2B	TF	false
105960	POLR3A	TF	false
105884	LIPA	Glycogene	false
114948	POLR3GL	TF	false
110809	PPARGC1A	TF	false
106864	GPI	Glycogene	false
108034	B3GALT5	Glycogene	false
111111	PRAME	TF	false
105963	PRKDC	TF	false
105954	PIGM	Glycogene	false
105841	HS3ST3B1	Glycogene	false
112229	RAG1	TF	false
106884	RARA	TF	false
116605	SLC35D2	Glycogene	false
108032	B3GNT9	Glycogene	false
105965	RB1	TF	false
105967	RBBP5	TF	false
108022	RBL1	TF	false
105968	RBL2	TF	false
105969	RCOR1	TF	false
108027	PIGA	Glycogene	false
105970	REST	TF	false
105971	RFX1	TF	false
105972	RFX5	TF	false
105974	RFX7	TF	false
107337	RLF	TF	false
105975	RNF2	TF	false
106014	GALNT1	Glycogene	false
105977	RORA	TF	false
105981	RUNX2	TF	false
105982	RUNX3	TF	false
105983	RXRA	TF	false
107338	RYBP	TF	false
114949	SAP30	TF	false
108614	SATB1	TF	false
107339	SETDB1	TF	false
105984	SIN3A	TF	false
106885	SIRT6	TF	false
105986	SIX5	TF	false
107341	SMAD1	TF	false
106886	SMAD2	TF	false
107342	SMAD3	TF	false
105987	SMAD4	TF	false
107343	SMARCA4	TF	false
105989	SMC1A	TF	false
105990	SMC3	TF	false
109686	SNAI2	TF	false
108618	SNAPC1	TF	false
126109	SOX15	TF	false
105908	B3GALNT2	Glycogene	false
108620	SOX4	TF	false
107346	SP2	TF	false
106888	SPIB	TF	false
105994	SRCAP	TF	false
105999	STAT1	TF	false
106001	STAT2	TF	false
108029	STAT5B	TF	false
107348	STAT6	TF	false
112231	SUMO1	TF	false
106004	SUMO2	TF	false
107349	SVIL	TF	false
106006	TAF1	TF	false
107351	TAF3	TF	false
108623	TAF7	TF	false
111113	TBL1X	TF	false
111114	TBL1XR1	TF	false
108030	TBP	TF	false
106889	TBX21	TF	false
106007	TCF12	TF	false
106008	TCF7	TF	false
106009	TCF7L1	TF	false
108004	B3GNT7	Glycogene	false
106010	TCF7L2	TF	false
106015	TERF1	TF	false
105791	COG7	Glycogene	false
105837	SULT1C4	Glycogene	false
107353	TERF2	TF	false
106016	TET2	TF	false
118340	TFAP2A	TF	false
107355	TFCP2	TF	false
108036	TFDP1	TF	false
108625	TFE3	TF	false
109691	TGIF1	TF	false
108626	THAP1	TF	false
114953	TLE3	TF	false
110814	TOP1	TF	false
110815	TOP2B	TF	false
108627	TP53	TF	false
106017	TP63	TF	false
105776	LAMP3	Glycogene	false
126110	TP73	TF	false
106018	TRIM28	TF	false
108628	TRRAP	TF	false
111116	TTF1	TF	false
106019	TTF2	TF	false
106020	UBTF	TF	false
106021	USF1	TF	false
106022	USF2	TF	false
106023	VEZF1	TF	false
106024	WDR5	TF	false
109692	WRNIP1	TF	false
106025	XRN2	TF	false
106032	C1GALT1C1	Glycogene	false
106028	YY1	TF	false
106029	ZBTB17	TF	false
106031	ZBTB33	TF	false
