# Supplementary material for: A systems-based framework to computationally describe putative transcription factors and signaling pathways regulating glycan biosynthesis
Source: publisher site journal article supplement (doi:10.3762/bjoc.17.119), 2021-07-22
Supplement: Additional file 2 [file 1860-5397-17-119-S2.cys › CytoscapeSession-2021_03_21-12_01/tables/127699-UCEC/LOCAL_ATTRS-org.cytoscape.model.CyNode-UCEC+default+node.cytable]

CyCSV-Version	1
SUID	name	nodeType	selected
java.lang.Long	java.lang.String	java.lang.String	java.lang.Boolean
		mutable
UCEC default node
113210	ALKBH3	TF	false
108590	GAL3ST3	Glycogene	false
105699	ARID2	TF	false
105824	COG6	Glycogene	false
108548	ARNT2	TF	false
105727	ALG10B	Glycogene	false
105702	SLC35A5	Glycogene	false
105701	ATF1	TF	false
105688	STT3B	Glycogene	false
106868	MGAT2	Glycogene	false
105710	ATF7IP	TF	false
105711	ALG10	Glycogene	false
105712	ATRX	TF	false
105713	FKTN	Glycogene	false
105823	COG3	Glycogene	false
105715	CSGALNACT2	Glycogene	false
105966	UGGT2	Glycogene	false
105721	BATF	TF	false
105685	FUT7	Glycogene	false
105726	BMI1	TF	false
105731	FAM20B	Glycogene	false
105728	BRCA1	TF	false
105729	PIGW	Glycogene	false
105874	PIGO	Glycogene	false
105733	BRD1	TF	false
105772	NDST2	Glycogene	false
107974	GALNT11	Glycogene	false
107276	BRD2	TF	false
105700	RTF1	Glycogene	false
105908	B3GALNT2	Glycogene	false
107277	BRD3	TF	false
105690	FUT11	Glycogene	false
105694	MAN2A1	Glycogene	false
105985	UGCG	Glycogene	false
107278	FUT10	Glycogene	false
105950	SLC35D1	Glycogene	false
106843	BRD4	TF	false
106844	SLC35E1	Glycogene	false
107977	BRD7	TF	false
105738	CASP8AP2	TF	false
105739	CBFB	TF	false
105741	CBX3	TF	false
105742	CMAS	Glycogene	false
111094	CD59	TF	false
112225	ST6GALNAC2	Glycogene	false
106848	CDK12	TF	false
105691	ACER2	Glycogene	false
106891	COG8	Glycogene	false
105756	CDK8	TF	false
105689	NEU3	Glycogene	false
105687	MAN1A2	Glycogene	false
105692	COG5	Glycogene	false
105705	UGGT1	Glycogene	false
105906	HS2ST1	Glycogene	false
105998	GANAB	Glycogene	false
105769	CHD1	TF	false
105771	OGT	Glycogene	false
105696	SLC35F5	Glycogene	false
108001	SLC35A1	Glycogene	false
106838	B3GNT2	Glycogene	false
105730	PIGN	Glycogene	false
105770	CHD2	TF	false
105717	CHSY1	Glycogene	false
105773	CHD4	TF	false
105799	DPM1	Glycogene	false
105774	CHD8	TF	false
107279	B4GALT5	Glycogene	false
105785	CREB1	TF	false
105786	CREB3	TF	false
105787	GMPPA	Glycogene	false
105788	CREB3L4	TF	false
105703	GALNT4	Glycogene	false
108015	B4GALNT3	Glycogene	false
108003	GCNT3	Glycogene	false
105790	CREBBP	TF	false
126103	CREM	TF	false
108568	CSNK2A1	TF	false
111096	CTBP2	TF	false
105794	CTNNB1	TF	false
106850	DCP1A	TF	false
112218	DDX5	TF	false
105844	EXTL2	Glycogene	false
105795	DEK	TF	false
108571	DR1	TF	false
108575	E2F8	TF	false
105825	ELF2	TF	false
107292	ERCC3	TF	false
105830	ERCC6	TF	false
105831	ERF	TF	false
112219	ESR1	TF	false
107296	GCNT2	Glycogene	false
105847	FANCD2	TF	false
105861	GABPA	TF	false
106835	PIGK	Glycogene	false
106863	GAPDH	TF	false
106864	GPI	Glycogene	false
105863	GATAD1	TF	false
108020	PIGB	Glycogene	false
112220	GLIS3	TF	false
105920	ST6GALNAC1	Glycogene	false
107274	B4GALT1	Glycogene	false
110806	GALK2	Glycogene	false
105866	GLYR1	TF	false
120757	GMEB1	TF	false
106893	STT3A	Glycogene	false
107301	GRHL2	TF	false
105695	SLC35A3	Glycogene	false
114938	GRHL3	TF	false
105871	GTF2I	TF	false
105893	MGAT5	Glycogene	false
105873	HCFC1	TF	false
105923	NDST1	Glycogene	false
105875	HECTD1	TF	false
107993	HEYL	TF	false
106887	EXTL1	Glycogene	false
106867	HIF1A	TF	false
107290	ASAH1	Glycogene	false
106014	GALNT1	Glycogene	false
105976	FPGT	Glycogene	false
106859	GALNT7	Glycogene	false
109670	C1GALT1	Glycogene	false
106032	C1GALT1C1	Glycogene	false
105877	HINFP	TF	false
105878	DPAGT1	Glycogene	false
107308	HOXA6	TF	false
107311	JARID2	TF	false
106873	KDM1B	TF	false
105903	KDM3A	TF	false
105922	IDS	Glycogene	false
106874	KDM4A	TF	false
107997	KDM4C	TF	false
105907	KDM5B	TF	false
107315	KDM6B	TF	false
108597	KLF15	TF	false
107327	POFUT2	Glycogene	false
110798	LARP7	TF	false
113227	LEO1	TF	false
105732	SLC35E3	Glycogene	false
105911	LYL1	TF	false
105766	MFNG	Glycogene	false
107323	MBD3	TF	false
105758	DPM2	Glycogene	false
108599	MBD4	TF	false
105919	MECOM	TF	false
105924	MED1	TF	false
107324	MED12	TF	false
110801	MNT	TF	false
105931	MRE11A	TF	false
105934	MYBL1	TF	false
107976	FUT8	Glycogene	false
117858	NCAPG2	TF	false
105943	NFAT5	TF	false
107329	NFYA	TF	false
105845	SLC35B4	Glycogene	false
107300	ALG11	Glycogene	false
105947	NIPBL	TF	false
112228	PALB2	TF	false
105956	PHF20	TF	false
105792	POFUT1	Glycogene	false
105957	PHF6	TF	false
105959	POLR2B	TF	false
105960	POLR3A	TF	false
114948	POLR3GL	TF	false
106012	ALG5	Glycogene	false
108021	PRDM4	TF	false
110810	PSIP1	TF	false
105965	RB1	TF	false
105967	RBBP5	TF	false
105969	RCOR1	TF	false
105970	REST	TF	false
105971	RFX1	TF	false
108611	RFX2	TF	false
108612	CHST5	Glycogene	false
105974	RFX7	TF	false
105975	RNF2	TF	false
107338	RYBP	TF	false
105984	SIN3A	TF	false
106885	SIRT6	TF	false
105722	DPM3	Glycogene	false
107341	SMAD1	TF	false
107344	SMARCC1	TF	false
105989	SMC1A	TF	false
105902	GNB1	Glycogene	false
105990	SMC3	TF	false
110812	SND1	TF	false
107346	SP2	TF	false
110813	SP4	TF	false
105993	SPDEF	TF	false
105791	COG7	Glycogene	false
107347	STAT3	TF	false
109689	PIGG	Glycogene	false
107349	SVIL	TF	false
106006	TAF1	TF	false
108623	TAF7	TF	false
106007	TCF12	TF	false
105851	GLCE	Glycogene	false
106013	TEAD1	TF	false
109690	TEAD2	TF	false
106015	TERF1	TF	false
107353	TERF2	TF	false
106016	TET2	TF	false
118045	TET3	TF	false
113234	TFAM	TF	false
107355	TFCP2	TF	false
108036	TFDP1	TF	false
108626	THAP1	TF	false
110815	TOP2B	TF	false
108628	TRRAP	TF	false
106019	TTF2	TF	false
106023	VEZF1	TF	false
105973	COG2	Glycogene	false
106025	XRN2	TF	false
106026	YAP1	TF	false
106028	YY1	TF	false
106894	ZBTB10	TF	false
106031	ZBTB33	TF	false
