# Supplementary material for: A systems-based framework to computationally describe putative transcription factors and signaling pathways regulating glycan biosynthesis
Source: publisher site journal article supplement (doi:10.3762/bjoc.17.119), 2021-07-22
Supplement: Additional file 2 [file 1860-5397-17-119-S2.cys › CytoscapeSession-2021_03_21-12_01/tables/128148-UVM/LOCAL_ATTRS-org.cytoscape.model.CyEdge-UVM+default+edge.cytable]

CyCSV-Version	1
SUID	interaction	name	selected
java.lang.Long	java.lang.String	java.lang.String	java.lang.Boolean
UVM default edge
128159	interacts with	ALKBH3 (interacts with) RTF1	false
128160	interacts with	ARNT2 (interacts with) ALG10B	false
128161	interacts with	ARNT2 (interacts with) PIGB	false
128162	interacts with	BCOR (interacts with) MGAT2	false
128163	interacts with	BRD2 (interacts with) FUT10	false
128164	interacts with	CAMTA2 (interacts with) COG1	false
128165	interacts with	CBX4 (interacts with) RFNG	false
128166	interacts with	CBX5 (interacts with) HEXB	false
128167	interacts with	CBX5 (interacts with) SLC35E3	false
128168	interacts with	CBX5 (interacts with) CMAS	false
128169	interacts with	CBX6 (interacts with) UGGT1	false
128170	interacts with	CDK12 (interacts with) PIGM	false
128171	interacts with	CHD4 (interacts with) SLC35E3	false
128172	interacts with	CHD4 (interacts with) HEXB	false
128173	interacts with	CHD4 (interacts with) GNE	false
128174	interacts with	CHD7 (interacts with) GCNT4	false
128175	interacts with	CHD7 (interacts with) GFPT1	false
128176	interacts with	CHD7 (interacts with) SLC35E3	false
128177	interacts with	CHD7 (interacts with) PIGB	false
128178	interacts with	CHD8 (interacts with) FUT11	false
128179	interacts with	CHD8 (interacts with) COG5	false
128180	interacts with	CHD8 (interacts with) UGGT1	false
128181	interacts with	CHD8 (interacts with) POFUT1	false
128182	interacts with	CHD8 (interacts with) SLC35E3	false
128183	interacts with	CHD8 (interacts with) B4GALT5	false
128184	interacts with	CHD8 (interacts with) GFPT1	false
128185	interacts with	CHD8 (interacts with) RPN2	false
128186	interacts with	CHD8 (interacts with) PIGF	false
128187	interacts with	CREB3 (interacts with) GMPPA	false
128188	interacts with	CREB3 (interacts with) B3GALT4	false
128189	interacts with	CREB3 (interacts with) GBA	false
128190	interacts with	CREB3 (interacts with) COG1	false
128191	interacts with	CREB3 (interacts with) B3GNT8	false
128192	interacts with	CREB3L4 (interacts with) HYAL2	false
128193	interacts with	CREBBP (interacts with) MGAT5	false
128194	interacts with	CREM (interacts with) DPM1	false
128195	interacts with	CTBP1 (interacts with) CHST5	false
128196	interacts with	DAXX (interacts with) HYAL2	false
128197	interacts with	DAXX (interacts with) HYAL1	false
128198	interacts with	DDIT3 (interacts with) COG5	false
128199	interacts with	DDIT3 (interacts with) B3GALNT2	false
128200	interacts with	DNMT3A (interacts with) B3GALNT2	false
128201	interacts with	DNMT3A (interacts with) B4GALT5	false
128202	interacts with	DNMT3A (interacts with) PIGM	false
128203	interacts with	DNMT3A (interacts with) UGDH	false
128204	interacts with	DNMT3A (interacts with) STT3B	false
128205	interacts with	DNMT3A (interacts with) C1GALT1C1	false
128206	interacts with	DNMT3A (interacts with) GFPT1	false
128207	interacts with	DNMT3A (interacts with) PIGA	false
128208	interacts with	DNMT3A (interacts with) COG6	false
128209	interacts with	DNMT3A (interacts with) GALK2	false
128210	interacts with	DNMT3A (interacts with) OGT	false
128211	interacts with	DNMT3A (interacts with) PIGF	false
128212	interacts with	DNMT3A (interacts with) SLC35B3	false
128213	interacts with	DNMT3A (interacts with) SLC35F5	false
128214	interacts with	DNMT3A (interacts with) FUT11	false
128215	interacts with	DNMT3A (interacts with) MGAT2	false
128216	interacts with	DNMT3A (interacts with) COG3	false
128217	interacts with	DNMT3A (interacts with) PIGB	false
128218	interacts with	DNMT3A (interacts with) FUT8	false
128219	interacts with	DNMT3A (interacts with) UAP1	false
128220	interacts with	DYRK1A (interacts with) PIGN	false
128221	interacts with	DYRK1A (interacts with) GLCE	false
128222	interacts with	DYRK1A (interacts with) SLC35B4	false
128223	interacts with	DYRK1A (interacts with) PIGW	false
128224	interacts with	E2F3 (interacts with) GNPNAT1	false
128225	interacts with	E2F3 (interacts with) GALNT1	false
128226	interacts with	E2F3 (interacts with) CHSY1	false
128227	interacts with	E2F3 (interacts with) SLC35A5	false
128228	interacts with	E2F3 (interacts with) B4GALT4	false
128229	interacts with	E2F3 (interacts with) GALNT4	false
128230	interacts with	E2F6 (interacts with) PIGW	false
128231	interacts with	E2F6 (interacts with) EXTL2	false
128232	interacts with	E2F6 (interacts with) UGP2	false
128233	interacts with	E2F6 (interacts with) B3GALNT2	false
128234	interacts with	E2F6 (interacts with) ALG10B	false
128235	interacts with	E2F6 (interacts with) UGDH	false
128236	interacts with	E2F6 (interacts with) ALG10	false
128237	interacts with	E2F6 (interacts with) COG5	false
128238	interacts with	E2F6 (interacts with) FKTN	false
128239	interacts with	E2F6 (interacts with) FUT8	false
128240	interacts with	E2F6 (interacts with) UAP1	false
128241	interacts with	E2F6 (interacts with) SLC35A3	false
128242	interacts with	E2F6 (interacts with) COG3	false
128243	interacts with	E2F6 (interacts with) MGAT2	false
128244	interacts with	EED (interacts with) FAM20B	false
128245	interacts with	EED (interacts with) FUT8	false
128246	interacts with	EED (interacts with) GALK2	false
128247	interacts with	EED (interacts with) DPM1	false
128248	interacts with	EED (interacts with) ALG5	false
128249	interacts with	EED (interacts with) MGAT2	false
128250	interacts with	EED (interacts with) PIGB	false
128251	interacts with	EED (interacts with) SULT1A3	false
128252	interacts with	EED (interacts with) SLC35F5	false
128253	interacts with	EED (interacts with) HEXB	false
128254	interacts with	EED (interacts with) SLC35B3	false
128255	interacts with	EED (interacts with) B3GNT5	false
128256	interacts with	EED (interacts with) MGAT4A	false
128257	interacts with	EED (interacts with) UGCG	false
128258	interacts with	EED (interacts with) ALG2	false
128259	interacts with	EED (interacts with) UAP1	false
128260	interacts with	EED (interacts with) PIGF	false
128261	interacts with	EED (interacts with) PIGG	false
128262	interacts with	EED (interacts with) CHST11	false
128263	interacts with	EED (interacts with) C1GALT1	false
128264	interacts with	EGLN2 (interacts with) B3GALT4	false
128265	interacts with	EGLN2 (interacts with) ALG3	false
128266	interacts with	EGLN2 (interacts with) SLC35A4	false
128267	interacts with	EGLN2 (interacts with) CHPF	false
128268	interacts with	EGLN2 (interacts with) DPAGT1	false
128269	interacts with	ERCC3 (interacts with) FKTN	false
128270	interacts with	ERCC3 (interacts with) COG6	false
128271	interacts with	ERCC3 (interacts with) DPM1	false
128272	interacts with	FUS (interacts with) TSTA3	false
128273	interacts with	FUS (interacts with) EXT1	false
128274	interacts with	GAPDH (interacts with) GPI	false
128275	interacts with	GMEB1 (interacts with) SLC35B4	false
128276	interacts with	GMEB1 (interacts with) SLC35A5	false
128277	interacts with	GPS2 (interacts with) GALK1	false
128278	interacts with	GTF2B (interacts with) CTBS	false
128279	interacts with	GTF2B (interacts with) FPGT	false
128280	interacts with	GTF2B (interacts with) DPM1	false
128281	interacts with	GTF2B (interacts with) PIGK	false
128282	interacts with	GTF2B (interacts with) B3GALNT2	false
128283	interacts with	GTF2B (interacts with) UGGT2	false
128284	interacts with	GTF2B (interacts with) COG6	false
128285	interacts with	GTF2B (interacts with) MAN2A1	false
128286	interacts with	GTF2B (interacts with) PIGB	false
128287	interacts with	GTF2B (interacts with) LAMP2	false
128288	interacts with	GTF2B (interacts with) FUT8	false
128289	interacts with	GTF2B (interacts with) GALK2	false
128290	interacts with	GTF2B (interacts with) UGP2	false
128291	interacts with	GTF2F1 (interacts with) RFNG	false
128292	interacts with	GTF3C1 (interacts with) COG8	false
128293	interacts with	GTF3C1 (interacts with) PIGQ	false
128294	interacts with	GTF3C1 (interacts with) GBA	false
128295	interacts with	GTF3C2 (interacts with) NEU1	false
128296	interacts with	GTF3C2 (interacts with) GBA	false
128297	interacts with	H2AFX (interacts with) TSTA3	false
128298	interacts with	HCFC1 (interacts with) GANAB	false
128299	interacts with	HECTD1 (interacts with) FUT11	false
128300	interacts with	HECTD1 (interacts with) FUT8	false
128301	interacts with	HECTD1 (interacts with) PIGH	false
128302	interacts with	HINFP (interacts with) FUT4	false
128303	interacts with	HINFP (interacts with) SLC35A5	false
128304	interacts with	HINFP (interacts with) C1GALT1	false
128305	interacts with	HINFP (interacts with) FUT10	false
128306	interacts with	HMGN3 (interacts with) FAM20B	false
128307	interacts with	HMGN3 (interacts with) GALNT4	false
128308	interacts with	HSF1 (interacts with) TSTA3	false
128309	interacts with	HSF1 (interacts with) DPM2	false
128310	interacts with	HSF1 (interacts with) GALK1	false
128311	interacts with	ING5 (interacts with) UGDH	false
128312	interacts with	INO80 (interacts with) MAN2A1	false
128313	interacts with	INO80 (interacts with) GALK2	false
128314	interacts with	INO80 (interacts with) CSGALNACT2	false
128315	interacts with	KAT5 (interacts with) SLC35C2	false
128316	interacts with	KDM2B (interacts with) RTF1	false
128317	interacts with	KDM2B (interacts with) UGGT1	false
128318	interacts with	KDM2B (interacts with) GALK2	false
128319	interacts with	KDM2B (interacts with) MGAT4A	false
128320	interacts with	KDM2B (interacts with) GFPT1	false
128321	interacts with	KDM2B (interacts with) FUT11	false
128322	interacts with	KDM2B (interacts with) UGDH	false
128323	interacts with	KDM2B (interacts with) MGAT2	false
128324	interacts with	KDM2B (interacts with) STT3B	false
128325	interacts with	KDM2B (interacts with) MAN1A2	false
128326	interacts with	KDM2B (interacts with) COG6	false
128327	interacts with	KDM2B (interacts with) CMAS	false
128328	interacts with	KDM2B (interacts with) COG3	false
128329	interacts with	KDM2B (interacts with) SLC35E3	false
128330	interacts with	KDM2B (interacts with) PIGB	false
128331	interacts with	KDM2B (interacts with) GALNT3	false
128332	interacts with	KDM2B (interacts with) SLC35B3	false
128333	interacts with	KDM2B (interacts with) COG5	false
128334	interacts with	KDM2B (interacts with) MAN2A1	false
128335	interacts with	KDM2B (interacts with) UXS1	false
128336	interacts with	KDM2B (interacts with) SLC35D1	false
128337	interacts with	KDM2B (interacts with) GALNT11	false
128338	interacts with	KDM4A (interacts with) GNB1	false
128339	interacts with	KDM4A (interacts with) PIGV	false
128340	interacts with	KDM4A (interacts with) MAN1B1	false
128341	interacts with	L3MBTL2 (interacts with) LAMP1	false
128342	interacts with	MAF (interacts with) ST8SIA4	false
128343	interacts with	MAF (interacts with) MAN1A1	false
128344	interacts with	MAF (interacts with) GALNT3	false
128345	interacts with	MAF (interacts with) GFPT1	false
128346	interacts with	MAF (interacts with) MAN2A1	false
128347	interacts with	MAF (interacts with) RTF1	false
128348	interacts with	MAFG (interacts with) XYLT1	false
128349	interacts with	MAZ (interacts with) CHST14	false
128350	interacts with	MEF2C (interacts with) GALNT4	false
128351	interacts with	MEF2C (interacts with) OGT	false
128352	interacts with	MEF2C (interacts with) ALG10B	false
128353	interacts with	MEF2C (interacts with) COG3	false
128354	interacts with	MEF2C (interacts with) SLC35A3	false
128355	interacts with	MEF2C (interacts with) SLC35F5	false
128356	interacts with	MEF2C (interacts with) DPM1	false
128357	interacts with	MEF2C (interacts with) SLC35A5	false
128358	interacts with	MEF2D (interacts with) B4GALT1	false
128359	interacts with	MEIS3 (interacts with) ST8SIA1	false
128360	interacts with	MITF (interacts with) LAMP2	false
128361	interacts with	MITF (interacts with) SLC35A5	false
128362	interacts with	MITF (interacts with) SLC35F5	false
128363	interacts with	MITF (interacts with) FPGT	false
128364	interacts with	MITF (interacts with) STT3B	false
128365	interacts with	MITF (interacts with) UGCG	false
128366	interacts with	MITF (interacts with) GALNT11	false
128367	interacts with	MITF (interacts with) B3GNT2	false
128368	interacts with	MITF (interacts with) GNPNAT1	false
128369	interacts with	MITF (interacts with) GALK2	false
128370	interacts with	MITF (interacts with) FAM20B	false
128371	interacts with	MNT (interacts with) GANAB	false
128372	interacts with	MXD3 (interacts with) NANS	false
128373	interacts with	MXD3 (interacts with) DPM2	false
128374	interacts with	MXD3 (interacts with) DAD1	false
128375	interacts with	MXD3 (interacts with) RENBP	false
128376	interacts with	MXD3 (interacts with) ALG1	false
128377	interacts with	MXI1 (interacts with) SLC35A5	false
128378	interacts with	MXI1 (interacts with) GLCE	false
128379	interacts with	MXI1 (interacts with) COG3	false
128380	interacts with	MXI1 (interacts with) CSGALNACT2	false
128381	interacts with	MXI1 (interacts with) PIGX	false
128382	interacts with	NFYA (interacts with) STT3B	false
128383	interacts with	NFYA (interacts with) PIGM	false
128384	interacts with	NFYA (interacts with) B3GALNT2	false
128385	interacts with	NFYA (interacts with) GALK2	false
128386	interacts with	NFYA (interacts with) OGT	false
128387	interacts with	NFYA (interacts with) FUT11	false
128388	interacts with	NFYA (interacts with) SLC35F5	false
128389	interacts with	NFYA (interacts with) MGAT2	false
128390	interacts with	NFYA (interacts with) COG3	false
128391	interacts with	NFYA (interacts with) COG6	false
128392	interacts with	NFYA (interacts with) DPM1	false
128393	interacts with	NFYA (interacts with) UGDH	false
128394	interacts with	NFYA (interacts with) GALNT11	false
128395	interacts with	NFYA (interacts with) UGP2	false
128396	interacts with	NFYC (interacts with) ST3GAL3	false
128397	interacts with	NFYC (interacts with) GALE	false
128398	interacts with	NFYC (interacts with) B3GALT6	false
128399	interacts with	NFYC (interacts with) DDOST	false
128400	interacts with	NFYC (interacts with) HYAL1	false
128401	interacts with	NFYC (interacts with) NAGA	false
128402	interacts with	NFYC (interacts with) CTSA	false
128403	interacts with	NR1H2 (interacts with) RFNG	false
128404	interacts with	NR1H2 (interacts with) PMM1	false
128405	interacts with	PALB2 (interacts with) SLC35A5	false
128406	interacts with	PCGF1 (interacts with) TSTA3	false
128407	interacts with	PCGF1 (interacts with) GBA	false
128408	interacts with	PHF20 (interacts with) UGCG	false
128409	interacts with	PIAS4 (interacts with) NDST1	false
128410	interacts with	PIAS4 (interacts with) COG1	false
128411	interacts with	PML (interacts with) ALG3	false
128412	interacts with	PML (interacts with) COG1	false
128413	interacts with	PML (interacts with) SLC35C2	false
128414	interacts with	PML (interacts with) PMM1	false
128415	interacts with	POLR3A (interacts with) MGAT5	false
128416	interacts with	POLR3A (interacts with) NEU3	false
128417	interacts with	POLR3A (interacts with) SLC35E3	false
128418	interacts with	POLR3A (interacts with) FUT11	false
128419	interacts with	POLR3A (interacts with) UGDH	false
128420	interacts with	POLR3GL (interacts with) PIGC	false
128421	interacts with	POLR3GL (interacts with) SLC35A3	false
128422	interacts with	POLR3GL (interacts with) PIGK	false
128423	interacts with	POLR3GL (interacts with) MGAT2	false
128424	interacts with	POLR3GL (interacts with) FPGT	false
128425	interacts with	PPARA (interacts with) STT3B	false
128426	interacts with	PPARA (interacts with) MAN2A1	false
128427	interacts with	PPARA (interacts with) CMAS	false
128428	interacts with	PRAME (interacts with) NEU1	false
128429	interacts with	PRAME (interacts with) MPI	false
128430	interacts with	RAC3 (interacts with) GALK1	false
128431	interacts with	RAC3 (interacts with) ALG8	false
128432	interacts with	RNF2 (interacts with) FAM20B	false
128433	interacts with	RNF2 (interacts with) STT3B	false
128434	interacts with	RNF2 (interacts with) SLC35A5	false
128435	interacts with	RNF2 (interacts with) MAN1A2	false
128436	interacts with	RNF2 (interacts with) GALNT1	false
128437	interacts with	RNF2 (interacts with) SLC35A3	false
128438	interacts with	RNF2 (interacts with) GNPNAT1	false
128439	interacts with	RNF2 (interacts with) FKTN	false
128440	interacts with	RNF2 (interacts with) PAPSS1	false
128441	interacts with	RNF2 (interacts with) B3GALNT1	false
128442	interacts with	RNF2 (interacts with) GALC	false
128443	interacts with	RNF2 (interacts with) GALNT4	false
128444	interacts with	RNF2 (interacts with) UGP2	false
128445	interacts with	RNF2 (interacts with) PIGX	false
128446	interacts with	RNF2 (interacts with) FUT4	false
128447	interacts with	RUNX3 (interacts with) FKRP	false
128448	interacts with	RUNX3 (interacts with) PIGV	false
128449	interacts with	SIN3A (interacts with) RTF1	false
128450	interacts with	SIN3A (interacts with) FUT11	false
128451	interacts with	SIN3A (interacts with) COG5	false
128452	interacts with	SIN3A (interacts with) SLC35E3	false
128453	interacts with	SIN3A (interacts with) GALK2	false
128454	interacts with	SIN3A (interacts with) UGDH	false
128455	interacts with	SIN3A (interacts with) PIGF	false
128456	interacts with	SIRT6 (interacts with) DPM2	false
128457	interacts with	SIRT6 (interacts with) PIGQ	false
128458	interacts with	SIX5 (interacts with) SLC35C2	false
128459	interacts with	SIX5 (interacts with) COG1	false
128460	interacts with	SMAD2 (interacts with) ALG10B	false
128461	interacts with	SMAD2 (interacts with) GALNT1	false
128462	interacts with	SMAD2 (interacts with) IDS	false
128463	interacts with	SMAD2 (interacts with) CSGALNACT2	false
128464	interacts with	SMAD2 (interacts with) SLC35B4	false
128465	interacts with	SMAD2 (interacts with) UGP2	false
128466	interacts with	SMAD2 (interacts with) MAN1A2	false
128467	interacts with	SMAD2 (interacts with) SLC35F5	false
128468	interacts with	SMAD2 (interacts with) COG7	false
128469	interacts with	SMARCB1 (interacts with) DPM2	false
128470	interacts with	SMARCB1 (interacts with) GALK1	false
128471	interacts with	SMARCB1 (interacts with) COG1	false
128472	interacts with	SNAPC5 (interacts with) UGCG	false
128473	interacts with	SP2 (interacts with) GANAB	false
128474	interacts with	STAT6 (interacts with) CHST3	false
128475	interacts with	SUPT5H (interacts with) COG1	false
128476	interacts with	TBP (interacts with) SLC35A1	false
128477	interacts with	TBP (interacts with) FAM20B	false
128478	interacts with	TBP (interacts with) UST	false
128479	interacts with	TCF12 (interacts with) FUT11	false
128480	interacts with	TCF12 (interacts with) COG5	false
128481	interacts with	TCF12 (interacts with) COG3	false
128482	interacts with	TCF12 (interacts with) UGDH	false
128483	interacts with	TCF12 (interacts with) GALK2	false
128484	interacts with	TCF12 (interacts with) B3GALNT2	false
128485	interacts with	TCF12 (interacts with) PIGB	false
128486	interacts with	TCF12 (interacts with) SLC35F5	false
128487	interacts with	TCF12 (interacts with) UGGT2	false
128488	interacts with	TCF12 (interacts with) UGP2	false
128489	interacts with	TCF12 (interacts with) C1GALT1C1	false
128490	interacts with	TCF12 (interacts with) SLC35B3	false
128491	interacts with	TCF12 (interacts with) SLC35E3	false
128492	interacts with	TCF12 (interacts with) PIGL	false
128493	interacts with	TCF12 (interacts with) COG7	false
128494	interacts with	TCFL5 (interacts with) ALG10B	false
128495	interacts with	TCFL5 (interacts with) PIGG	false
128496	interacts with	TEAD1 (interacts with) CSGALNACT2	false
128497	interacts with	TEAD1 (interacts with) UGCG	false
128498	interacts with	TEAD1 (interacts with) SLC35A3	false
128499	interacts with	TEAD1 (interacts with) FAM20B	false
128500	interacts with	TEAD1 (interacts with) EXTL2	false
128501	interacts with	TEAD1 (interacts with) SLC35D1	false
128502	interacts with	TEAD1 (interacts with) SLC35A5	false
128503	interacts with	TEAD1 (interacts with) GALNT1	false
128504	interacts with	TEAD1 (interacts with) GLCE	false
128505	interacts with	TEAD1 (interacts with) COG6	false
128506	interacts with	TEAD1 (interacts with) FUT4	false
128507	interacts with	TEAD1 (interacts with) UXS1	false
128508	interacts with	TEAD1 (interacts with) C1GALT1	false
128509	interacts with	TEAD1 (interacts with) COG3	false
128510	interacts with	TEAD1 (interacts with) B4GALT4	false
128511	interacts with	TEAD1 (interacts with) UGGT2	false
128512	interacts with	TEAD1 (interacts with) UGP2	false
128513	interacts with	TEAD2 (interacts with) B4GALT3	false
128514	interacts with	TEAD4 (interacts with) GAA	false
128515	interacts with	TEAD4 (interacts with) SLC35A4	false
128516	interacts with	TEAD4 (interacts with) GMPPA	false
128517	interacts with	TERF1 (interacts with) FAM20B	false
128518	interacts with	TERF1 (interacts with) STT3B	false
128519	interacts with	TERF1 (interacts with) FKTN	false
128520	interacts with	TERF1 (interacts with) SLC35F5	false
128521	interacts with	TERF1 (interacts with) PIGK	false
128522	interacts with	TERF1 (interacts with) SLC35E3	false
128523	interacts with	TERF1 (interacts with) SLC35A3	false
128524	interacts with	TERF1 (interacts with) MAN2A1	false
128525	interacts with	TERF1 (interacts with) PIGW	false
128526	interacts with	TERF1 (interacts with) GALNT3	false
128527	interacts with	TERF1 (interacts with) SLC35B4	false
128528	interacts with	TERF1 (interacts with) FPGT	false
128529	interacts with	TERF1 (interacts with) COG3	false
128530	interacts with	TERF1 (interacts with) COG7	false
128531	interacts with	TERF1 (interacts with) ALG2	false
128532	interacts with	TERF1 (interacts with) GALK2	false
128533	interacts with	TERF1 (interacts with) SULT1A3	false
128534	interacts with	TERF1 (interacts with) OGT	false
128535	interacts with	TERF1 (interacts with) SLC35B3	false
128536	interacts with	TERF1 (interacts with) PIGL	false
128537	interacts with	TERF1 (interacts with) PIGH	false
128538	interacts with	TERF1 (interacts with) ALG5	false
128539	interacts with	TERF1 (interacts with) PIGF	false
128540	interacts with	TERF1 (interacts with) ST8SIA4	false
128541	interacts with	TFE3 (interacts with) GAA	false
128542	interacts with	TFE3 (interacts with) CTSA	false
128543	interacts with	TFE3 (interacts with) SULF2	false
128544	interacts with	TFE3 (interacts with) GBA	false
128545	interacts with	TFE3 (interacts with) DPM2	false
128546	interacts with	TGIF1 (interacts with) SLC35A5	false
128547	interacts with	WRNIP1 (interacts with) GALNT4	false
128548	interacts with	WRNIP1 (interacts with) C1GALT1	false
128549	interacts with	XRN2 (interacts with) STT3B	false
128550	interacts with	XRN2 (interacts with) MAN2A1	false
128551	interacts with	XRN2 (interacts with) MAN1A2	false
128552	interacts with	XRN2 (interacts with) COG5	false
128553	interacts with	XRN2 (interacts with) SLC35F5	false
128554	interacts with	XRN2 (interacts with) EXTL2	false
128555	interacts with	XRN2 (interacts with) MGAT2	false
128556	interacts with	XRN2 (interacts with) UGGT2	false
128557	interacts with	XRN2 (interacts with) GFPT1	false
128558	interacts with	XRN2 (interacts with) OGT	false
128559	interacts with	XRN2 (interacts with) C1GALT1C1	false
128560	interacts with	XRN2 (interacts with) GALNT11	false
128561	interacts with	XRN2 (interacts with) GALK2	false
128562	interacts with	YAP1 (interacts with) SLC35F5	false
128563	interacts with	YAP1 (interacts with) COG5	false
128564	interacts with	YAP1 (interacts with) COG6	false
128565	interacts with	YAP1 (interacts with) PIGK	false
128566	interacts with	YAP1 (interacts with) EXTL2	false
128567	interacts with	YAP1 (interacts with) SLC35D1	false
128568	interacts with	YAP1 (interacts with) OGT	false
128569	interacts with	YAP1 (interacts with) UGP2	false
128570	interacts with	YAP1 (interacts with) C1GALT1	false
128571	interacts with	YAP1 (interacts with) SLC35E3	false
128572	interacts with	ZBTB10 (interacts with) ALG10	false
128573	interacts with	ZBTB10 (interacts with) SLC35F5	false
128574	interacts with	ZBTB10 (interacts with) UGP2	false
