# Supplementary material for: A systems-based framework to computationally describe putative transcription factors and signaling pathways regulating glycan biosynthesis
Source: publisher site journal article supplement (doi:10.3762/bjoc.17.119), 2021-07-22
Supplement: Additional file 2 [file 1860-5397-17-119-S2.cys › CytoscapeSession-2021_03_21-12_01/tables/128575-ACC/LOCAL_ATTRS-org.cytoscape.model.CyNode-ACC+default+node.cytable]

CyCSV-Version	1
SUID	name	nodeType	selected
java.lang.Long	java.lang.String	java.lang.String	java.lang.Boolean
		mutable
ACC default node
105686	AFF4	TF	false
105687	MAN1A2	Glycogene	false
105688	STT3B	Glycogene	false
105689	NEU3	Glycogene	false
105694	MAN2A1	Glycogene	false
105702	SLC35A5	Glycogene	false
105824	COG6	Glycogene	false
107350	LAMP2	Glycogene	false
106836	AHR	TF	false
105709	HAS2	Glycogene	false
107976	FUT8	Glycogene	false
105701	ATF1	TF	false
105695	SLC35A3	Glycogene	false
105874	PIGO	Glycogene	false
105710	ATF7IP	TF	false
105711	ALG10	Glycogene	false
105727	ALG10B	Glycogene	false
105725	BCAT1	TF	false
105760	MAN1B1	Glycogene	false
126100	BCLAF1	TF	false
105998	GANAB	Glycogene	false
110788	BCOR	TF	false
106868	MGAT2	Glycogene	false
105806	ST3GAL2	Glycogene	false
107977	BRD7	TF	false
105966	UGGT2	Glycogene	false
106032	C1GALT1C1	Glycogene	false
105736	C17orf49	TF	false
105754	B3GAT3	Glycogene	false
105880	TSTA3	Glycogene	false
105737	HYAL2	Glycogene	false
111093	CAMTA2	TF	false
109671	ALG2	Glycogene	false
105743	CBX4	TF	false
107287	FUT2	Glycogene	false
111094	CD59	TF	false
110791	CEBPG	TF	false
105845	SLC35B4	Glycogene	false
105773	CHD4	TF	false
105786	CREB3	TF	false
108568	CSNK2A1	TF	false
105732	SLC35E3	Glycogene	false
105791	COG7	Glycogene	false
108569	DAXX	TF	false
108008	DAD1	Glycogene	false
113220	HYAL3	Glycogene	false
110793	DDIT3	TF	false
105883	GM2A	Glycogene	false
108570	DOT1L	TF	false
108023	POMT2	Glycogene	false
105832	ERG	TF	false
106861	CHST15	Glycogene	false
107296	GCNT2	Glycogene	false
106862	FUS	TF	false
106844	SLC35E1	Glycogene	false
106863	GAPDH	TF	false
106864	GPI	Glycogene	false
105866	GLYR1	TF	false
105867	ALG1	Glycogene	false
105692	COG5	Glycogene	false
106835	PIGK	Glycogene	false
105871	GTF2I	TF	false
108591	HBP1	TF	false
105873	HCFC1	TF	false
105875	HECTD1	TF	false
105985	UGCG	Glycogene	false
112221	HEXIM1	TF	false
106005	COG1	Glycogene	false
105729	PIGW	Glycogene	false
106867	HIF1A	TF	false
105877	HINFP	TF	false
105762	MOGS	Glycogene	false
105761	POMT1	Glycogene	false
107308	HOXA6	TF	false
110797	HOXA7	TF	false
128585	HOXB6	TF	false
108605	GALNT9	Glycogene	false
111106	KLF10	TF	false
105691	ACER2	Glycogene	false
108597	KLF15	TF	false
105748	MAN2A2	Glycogene	false
110798	LARP7	TF	false
107989	ST6GALNAC5	Glycogene	false
107320	LDB1	TF	false
108601	MLLT1	TF	false
105715	CSGALNACT2	Glycogene	false
110801	MNT	TF	false
105932	MSX1	TF	false
105979	SULF2	Glycogene	false
107327	POFUT2	Glycogene	false
105933	MXD3	TF	false
105758	DPM2	Glycogene	false
105934	MYBL1	TF	false
106854	XYLT1	Glycogene	false
105942	MZF1	TF	false
108032	B3GNT9	Glycogene	false
117858	NCAPG2	TF	false
105717	CHSY1	Glycogene	false
105945	NFIC	TF	false
105893	MGAT5	Glycogene	false
105855	GNPNAT1	Glycogene	false
105946	NFYC	TF	false
113232	PCGF6	TF	false
114931	HS3ST5	Glycogene	false
105956	PHF20	TF	false
105792	POFUT1	Glycogene	false
107980	PIGX	Glycogene	false
105957	PHF6	TF	false
105782	B4GALT7	Glycogene	false
114944	AGA	Glycogene	false
108586	SLC35A4	Glycogene	false
123853	PITX1	TF	false
105959	POLR2B	TF	false
105713	FKTN	Glycogene	false
105973	COG2	Glycogene	false
105960	POLR3A	TF	false
105690	FUT11	Glycogene	false
105697	GALNT10	Glycogene	false
114948	POLR3GL	TF	false
106030	B3GALT4	Glycogene	false
105800	KHK	Glycogene	false
106881	PPARA	TF	false
107300	ALG11	Glycogene	false
107996	HS6ST1	Glycogene	false
108021	PRDM4	TF	false
106882	GFPT1	Glycogene	false
107335	SLC35A2	Glycogene	false
105968	RBL2	TF	false
105976	FPGT	Glycogene	false
105974	RFX7	TF	false
105703	GALNT4	Glycogene	false
105977	RORA	TF	false
106857	ST3GAL5	Glycogene	false
105751	HYAL1	Glycogene	false
105990	SMC3	TF	false
110812	SND1	TF	false
106006	TAF1	TF	false
105771	OGT	Glycogene	false
105922	IDS	Glycogene	false
107351	TAF3	TF	false
108623	TAF7	TF	false
116610	TBX3	TF	false
112232	TCFL5	TF	false
109689	PIGG	Glycogene	false
109690	TEAD2	TF	false
105802	FUT1	Glycogene	false
113234	TFAM	TF	false
107355	TFCP2	TF	false
108625	TFE3	TF	false
107984	CTSA	Glycogene	false
110814	TOP1	TF	false
107291	PAPSS1	Glycogene	false
108629	UBE2I	TF	false
105763	CHST12	Glycogene	false
106025	XRN2	TF	false
105799	DPM1	Glycogene	false
106031	ZBTB33	TF	false
