# Supplementary material for: A systems-based framework to computationally describe putative transcription factors and signaling pathways regulating glycan biosynthesis
Source: publisher site journal article supplement (doi:10.3762/bjoc.17.119), 2021-07-22
Supplement: Additional file 2 [file 1860-5397-17-119-S2.cys › CytoscapeSession-2021_03_21-12_01/tables/159940-BLCA/LOCAL_ATTRS-org.cytoscape.model.CyNode-BLCA+default++node.cytable]

CyCSV-Version	1
SUID	name	nodeType	selected
java.lang.Long	java.lang.String	java.lang.String	java.lang.Boolean
		mutable
BLCA default node
105699	ARID2	TF	false
105700	RTF1	Glycogene	false
105701	ATF1	TF	false
105702	SLC35A5	Glycogene	false
105688	STT3B	Glycogene	false
105695	SLC35A3	Glycogene	false
105690	FUT11	Glycogene	false
105906	HS2ST1	Glycogene	false
105696	SLC35F5	Glycogene	false
105694	MAN2A1	Glycogene	false
105851	GLCE	Glycogene	false
107350	LAMP2	Glycogene	false
105998	GANAB	Glycogene	false
105799	DPM1	Glycogene	false
105717	CHSY1	Glycogene	false
105854	RPN2	Glycogene	false
105712	ATRX	TF	false
106868	MGAT2	Glycogene	false
105714	BACH1	TF	false
105715	CSGALNACT2	Glycogene	false
105985	UGCG	Glycogene	false
105687	MAN1A2	Glycogene	false
105716	MAN1A1	Glycogene	false
105689	NEU3	Glycogene	false
105692	COG5	Glycogene	false
106838	B3GNT2	Glycogene	false
107279	B4GALT5	Glycogene	false
106882	GFPT1	Glycogene	false
105725	BCAT1	TF	false
105806	ST3GAL2	Glycogene	false
105726	BMI1	TF	false
105703	GALNT4	Glycogene	false
105728	BRCA1	TF	false
105729	PIGW	Glycogene	false
105711	ALG10	Glycogene	false
105705	UGGT1	Glycogene	false
107980	PIGX	Glycogene	false
105855	GNPNAT1	Glycogene	false
105798	SLC35B1	Glycogene	false
105936	RPN1	Glycogene	false
106879	ALG6	Glycogene	false
105733	BRD1	TF	false
105771	OGT	Glycogene	false
105864	ALG13	Glycogene	false
107276	BRD2	TF	false
105727	ALG10B	Glycogene	false
109689	PIGG	Glycogene	false
105976	FPGT	Glycogene	false
107277	BRD3	TF	false
109671	ALG2	Glycogene	false
106843	BRD4	TF	false
106844	SLC35E1	Glycogene	false
105748	MAN2A2	Glycogene	false
110789	BTAF1	TF	false
108578	PIGL	Glycogene	false
105738	CASP8AP2	TF	false
105741	CBX3	TF	false
106847	CBX6	TF	false
109669	UXS1	Glycogene	false
105752	CBX8	TF	false
105784	B4GALNT4	Glycogene	false
106848	CDK12	TF	false
105874	PIGO	Glycogene	false
105756	CDK8	TF	false
106835	PIGK	Glycogene	false
109670	C1GALT1	Glycogene	false
105757	CDK9	TF	false
105758	DPM2	Glycogene	false
105760	MAN1B1	Glycogene	false
105764	CEBPA	TF	false
105765	NAGK	Glycogene	false
108564	CEBPZ	TF	false
160033	CENPA	TF	false
105800	KHK	Glycogene	false
107335	SLC35A2	Glycogene	false
105769	CHD1	TF	false
105770	CHD2	TF	false
105773	CHD4	TF	false
105732	SLC35E3	Glycogene	false
105774	CHD8	TF	false
105775	CIITA	TF	false
105685	FUT7	Glycogene	false
105776	LAMP3	Glycogene	false
105859	HK3	Glycogene	false
108552	GCNT1	Glycogene	false
105780	CPSF3L	TF	false
105781	B3GALT6	Glycogene	false
105744	RFNG	Glycogene	false
105722	DPM3	Glycogene	false
105786	CREB3	TF	false
111095	CREB3L2	TF	false
126103	CREM	TF	false
107328	PAPSS2	Glycogene	false
108568	CSNK2A1	TF	false
105794	CTNNB1	TF	false
105824	COG6	Glycogene	false
106850	DCP1A	TF	false
105795	DEK	TF	false
107281	SLC35B3	Glycogene	false
105707	B3GNT5	Glycogene	false
108000	GALNT3	Glycogene	false
108571	DR1	TF	false
105796	E2F1	TF	false
105753	GALK1	Glycogene	false
105735	PMM1	Glycogene	false
108574	GUSB	Glycogene	false
107987	E2F4	TF	false
106892	COG4	Glycogene	false
105803	E2F7	TF	false
105816	EGR2	TF	false
105719	GFPT2	Glycogene	false
106883	SULF1	Glycogene	false
105833	CHSY3	Glycogene	false
105718	CHST11	Glycogene	false
105841	HS3ST3B1	Glycogene	false
106861	CHST15	Glycogene	false
105809	TPST1	Glycogene	false
107989	ST6GALNAC5	Glycogene	false
105979	SULF2	Glycogene	false
105811	ST3GAL6	Glycogene	false
105819	EHF	TF	false
105822	ELF1	TF	false
105823	COG3	Glycogene	false
105730	PIGN	Glycogene	false
106859	GALNT7	Glycogene	false
105826	ELK3	TF	false
105829	EP400	TF	false
105908	B3GALNT2	Glycogene	false
107292	ERCC3	TF	false
105830	ERCC6	TF	false
105772	NDST2	Glycogene	false
105839	ETS1	TF	false
108582	EZH2	TF	false
105820	UAP1	Glycogene	false
107295	FOSL2	TF	false
105893	MGAT5	Glycogene	false
105850	FOXA1	TF	false
105853	FOXM1	TF	false
105789	B4GALT3	Glycogene	false
105902	GNB1	Glycogene	false
105858	FOXP3	TF	false
105834	ST8SIA4	Glycogene	false
106855	ST6GAL1	Glycogene	false
105861	GABPA	TF	false
106863	GAPDH	TF	false
106864	GPI	Glycogene	false
105862	GATA6	TF	false
105817	HPSE2	Glycogene	false
105863	GATAD1	TF	false
114938	GRHL3	TF	false
106860	MGAT4A	Glycogene	false
105691	ACER2	Glycogene	false
105871	GTF2I	TF	false
105792	POFUT1	Glycogene	false
109675	GLB1	Glycogene	false
105873	HCFC1	TF	false
107300	ALG11	Glycogene	false
108593	HDAC6	TF	false
107327	POFUT2	Glycogene	false
105875	HECTD1	TF	false
106867	HIF1A	TF	false
105950	SLC35D1	Glycogene	false
108580	EXT1	Glycogene	false
105877	HINFP	TF	false
105878	DPAGT1	Glycogene	false
105761	POMT1	Glycogene	false
118332	HOXA13	TF	false
105885	INO80	TF	false
105886	INTS3	TF	false
105749	IDUA	Glycogene	false
105887	IRF1	TF	false
106872	IRF3	TF	false
105894	JMJD6	TF	false
107312	KAT2B	TF	false
105713	FKTN	Glycogene	false
111099	A4GNT	Glycogene	false
107313	KDM2B	TF	false
107997	KDM4C	TF	false
105904	KDM5A	TF	false
105907	KDM5B	TF	false
107316	KLF11	TF	false
107317	KLF4	TF	false
107318	KLF5	TF	false
110798	LARP7	TF	false
109681	LMNB1	TF	false
105911	LYL1	TF	false
105766	MFNG	Glycogene	false
105897	GBGT1	Glycogene	false
105913	CHST13	Glycogene	false
107323	MBD3	TF	false
105759	PIGQ	Glycogene	false
105754	B3GAT3	Glycogene	false
105881	GPAA1	Glycogene	false
108599	MBD4	TF	false
105919	MECOM	TF	false
108020	PIGB	Glycogene	false
105924	MED1	TF	false
107324	MED12	TF	false
106877	MEF2B	TF	false
108612	CHST5	Glycogene	false
106878	MEIS3	TF	false
105931	MRE11A	TF	false
105935	MYBL2	TF	false
105937	MYH11	TF	false
105815	ST6GALNAC3	Glycogene	false
108602	NCAPG	TF	false
107329	NFYA	TF	false
105947	NIPBL	TF	false
105948	NPAT	TF	false
109685	NR1H2	TF	false
105949	NR2C2	TF	false
105951	NR2F1	TF	false
105953	PBX1	TF	false
108001	SLC35A1	Glycogene	false
113231	PBX3	TF	false
105956	PHF20	TF	false
107334	PHF8	TF	false
108027	PIGA	Glycogene	false
105959	POLR2B	TF	false
105960	POLR3A	TF	false
111111	PRAME	TF	false
105962	PRDM1	TF	false
108021	PRDM4	TF	false
105963	PRKDC	TF	false
106893	STT3A	Glycogene	false
105964	RAC3	TF	false
105965	RB1	TF	false
108022	RBL1	TF	false
105968	RBL2	TF	false
105969	RCOR1	TF	false
105970	REST	TF	false
105972	RFX5	TF	false
105974	RFX7	TF	false
108613	RING1	TF	false
105975	RNF2	TF	false
105731	FAM20B	Glycogene	false
105981	RUNX2	TF	false
107338	RYBP	TF	false
108615	SFMBT1	TF	false
107309	GBA	Glycogene	false
105984	SIN3A	TF	false
106869	GALC	Glycogene	false
106885	SIRT6	TF	false
107342	SMAD3	TF	false
107293	HK1	Glycogene	false
105941	HAS3	Glycogene	false
107344	SMARCC1	TF	false
105988	SMARCC2	TF	false
105989	SMC1A	TF	false
105990	SMC3	TF	false
109686	SNAI2	TF	false
105740	GALNS	Glycogene	false
108618	SNAPC1	TF	false
107346	SP2	TF	false
107971	NEU1	Glycogene	false
105994	SRCAP	TF	false
105791	COG7	Glycogene	false
105997	SSRP1	TF	false
105999	STAT1	TF	false
105884	LIPA	Glycogene	false
106003	STAT5A	TF	false
106839	ST6GALNAC4	Glycogene	false
106006	TAF1	TF	false
107351	TAF3	TF	false
108031	TCF21	TF	false
105805	CSGALNACT1	Glycogene	false
106013	TEAD1	TF	false
107297	GNE	Glycogene	false
105697	GALNT10	Glycogene	false
106015	TERF1	TF	false
106016	TET2	TF	false
118045	TET3	TF	false
107354	TFAP2C	TF	false
108036	TFDP1	TF	false
108626	THAP1	TF	false
106890	THAP11	TF	false
106891	COG8	Glycogene	false
106017	TP63	TF	false
106857	ST3GAL5	Glycogene	false
109687	UGT1A9	Glycogene	false
106019	TTF2	TF	false
107356	VDR	TF	false
106024	WDR5	TF	false
105917	B4GALT2	Glycogene	false
106025	XRN2	TF	false
106026	YAP1	TF	false
105869	CTBS	Glycogene	false
108005	SLC17A5	Glycogene	false
106028	YY1	TF	false
106029	ZBTB17	TF	false
106031	ZBTB33	TF	false
106032	C1GALT1C1	Glycogene	false
105954	PIGM	Glycogene	false
