# Supplementary material for: A systems-based framework to computationally describe putative transcription factors and signaling pathways regulating glycan biosynthesis
Source: publisher site journal article supplement (doi:10.3762/bjoc.17.119), 2021-07-22
Supplement: Additional file 2 [file 1860-5397-17-119-S2.cys › CytoscapeSession-2021_03_21-12_01/views/105674-132612-Luminal+Breast.xgmml]

<?xml version="1.0" encoding="UTF-8" standalone="yes"?>
<graph id="132612" label="Luminal Breast" cy:view="1" cy:networkId="105674" cy:visualStyle="default" cy:rendererId="org.cytoscape.ding" cy:documentVersion="3.0" xmlns:dc="http://purl.org/dc/elements/1.1/" xmlns:xlink="http://www.w3.org/1999/xlink" xmlns:rdf="http://www.w3.org/1999/02/22-rdf-syntax-ns#" xmlns:cy="http://www.cytoscape.org" xmlns="http://www.cs.rpi.edu/XGMML">
  <graphics>
    <att name="NETWORK_NODE_SELECTION" value="true" type="string" cy:type="String"/>
    <att name="NETWORK_CENTER_X_LOCATION" value="223.06294421962826" type="string" cy:type="String"/>
    <att name="NETWORK_HEIGHT" value="510.0" type="string" cy:type="String"/>
    <att name="NETWORK_TITLE" value="Luminal Breast" type="string" cy:type="String"/>
    <att name="NETWORK_EDGE_SELECTION" value="true" type="string" cy:type="String"/>
    <att name="NETWORK_CENTER_Y_LOCATION" value="-39.755006377039024" type="string" cy:type="String"/>
    <att name="NETWORK_WIDTH" value="1312.0" type="string" cy:type="String"/>
    <att name="NETWORK_DEPTH" value="0.0" type="string" cy:type="String"/>
    <att name="NETWORK_SCALE_FACTOR" value="0.13755825022498952" type="string" cy:type="String"/>
    <att name="NETWORK_ANNOTATION_SELECTION" value="false" type="string" cy:type="String"/>
    <att name="NETWORK_CENTER_Z_LOCATION" value="0.0" type="string" cy:type="String"/>
  </graphics>
  <node id="132678" label="RBL2" cy:nodeId="105968">
    <graphics y="797.7383527246793" z="0.0" x="-1000.6926633696844"/>
  </node>
  <node id="132679" label="RBBP5" cy:nodeId="105967">
    <graphics y="631.3480329004606" z="0.0" x="-654.1731321196844"/>
  </node>
  <node id="132676" label="REST" cy:nodeId="105970">
    <graphics y="231.0871991602262" z="0.0" x="-564.6583005767156"/>
  </node>
  <node id="132677" label="RCOR1" cy:nodeId="105969">
    <graphics y="335.79981512702307" z="0.0" x="-1026.438879189997"/>
  </node>
  <node id="132674" label="RFX5" cy:nodeId="105972">
    <graphics y="1985.3238629785856" z="0.0" x="-1176.0364133696844"/>
  </node>
  <node id="132675" label="RFX1" cy:nodeId="105971">
    <graphics y="-758.5241594823519" z="0.0" x="1295.263269247503"/>
  </node>
  <node id="132672" label="RFX7" cy:nodeId="105974">
    <graphics y="228.14036078131994" z="0.0" x="-1238.5325071196844"/>
  </node>
  <node id="132673" label="COG2" cy:nodeId="105973">
    <graphics y="1854.6251325098356" z="0.0" x="-1138.663244424372"/>
  </node>
  <node id="132670" label="FPGT" cy:nodeId="105976">
    <graphics y="1396.4571637598356" z="0.0" x="-1013.7247678618719"/>
  </node>
  <node id="132671" label="RNF2" cy:nodeId="105975">
    <graphics y="1669.439951845773" z="0.0" x="-1086.319982705622"/>
  </node>
  <node id="132668" label="RUNX1" cy:nodeId="105978">
    <graphics y="-487.5830889257113" z="0.0" x="-221.09052103570002"/>
  </node>
  <node id="132669" label="RORA" cy:nodeId="105977">
    <graphics y="-744.2528582128207" z="0.0" x="-388.5426389556219"/>
  </node>
  <node id="132666" label="ST8SIA2" cy:nodeId="105980">
    <graphics y="-682.6146746190707" z="0.0" x="-247.30408304741877"/>
  </node>
  <node id="132667" label="SULF2" cy:nodeId="105979">
    <graphics y="-346.11681084953943" z="0.0" x="-95.52161234429377"/>
  </node>
  <node id="132664" label="RUNX3" cy:nodeId="105982">
    <graphics y="-892.9228411229769" z="0.0" x="-33.207418618707834"/>
  </node>
  <node id="132665" label="RUNX2" cy:nodeId="105981">
    <graphics y="-403.14845757805506" z="0.0" x="72.44596272894842"/>
  </node>
  <node id="132662" label="SIN3A" cy:nodeId="105984">
    <graphics y="744.0393170801481" z="0.0" x="-942.5068723540594"/>
  </node>
  <node id="132663" label="RXRA" cy:nodeId="105983">
    <graphics y="-255.78799920403162" z="0.0" x="880.7751711029719"/>
  </node>
  <node id="132660" label="SIX5" cy:nodeId="105986">
    <graphics y="-508.5880938085238" z="0.0" x="1364.743737997503"/>
  </node>
  <node id="132661" label="UGCG" cy:nodeId="105985">
    <graphics y="896.4351911035856" z="0.0" x="-876.7030393462469"/>
  </node>
  <node id="132658" label="SMARCC2" cy:nodeId="105988">
    <graphics y="-135.64453225456873" z="0.0" x="-1377.6658079009344"/>
  </node>
  <node id="132659" label="SMAD4" cy:nodeId="105987">
    <graphics y="892.3499860254606" z="0.0" x="-1607.399572549372"/>
  </node>
  <node id="132656" label="SMC3" cy:nodeId="105990">
    <graphics y="676.4443463770231" z="0.0" x="-819.8072263579656"/>
  </node>
  <node id="132657" label="SMC1A" cy:nodeId="105989">
    <graphics y="549.6768292871793" z="0.0" x="-584.7366086821844"/>
  </node>
  <node id="132654" label="SOX17" cy:nodeId="105992">
    <graphics y="-617.3527422460238" z="0.0" x="638.0342958588312"/>
  </node>
  <node id="132655" label="SOX10" cy:nodeId="105991">
    <graphics y="-326.38255791985193" z="0.0" x="163.16551763007146"/>
  </node>
  <node id="132652" label="SRCAP" cy:nodeId="105994">
    <graphics y="630.5293683496793" z="0.0" x="201.42594510504705"/>
  </node>
  <node id="132653" label="SPDEF" cy:nodeId="105993">
    <graphics y="116.02073187506994" z="0.0" x="1288.165857138128"/>
  </node>
  <node id="132650" label="SRF" cy:nodeId="105996">
    <graphics y="-835.8614397557894" z="0.0" x="636.0097902435969"/>
  </node>
  <node id="132651" label="SREBF2" cy:nodeId="105995">
    <graphics y="210.0442304102262" z="0.0" x="2480.4472292084406"/>
  </node>
  <node id="132648" label="GANAB" cy:nodeId="105998">
    <graphics y="2094.6214398828824" z="0.0" x="-2322.69297617486"/>
  </node>
  <node id="132649" label="SSRP1" cy:nodeId="105997">
    <graphics y="2085.3238629785856" z="0.0" x="-2422.2598020415594"/>
  </node>
  <node id="132646" label="HPSE" cy:nodeId="106000">
    <graphics y="-1368.929432919852" z="0.0" x="-135.4513303618719"/>
  </node>
  <node id="132647" label="STAT1" cy:nodeId="105999">
    <graphics y="-1269.822011044852" z="0.0" x="18.606347860784354"/>
  </node>
  <node id="132644" label="STAT4" cy:nodeId="106002">
    <graphics y="-1015.6703997167269" z="0.0" x="302.75861531683904"/>
  </node>
  <node id="132645" label="STAT2" cy:nodeId="106001">
    <graphics y="-1162.340809872977" z="0.0" x="-57.791769204645334"/>
  </node>
  <node id="132642" label="SUMO2" cy:nodeId="106004">
    <graphics y="1127.583994814523" z="0.0" x="836.9941042084406"/>
  </node>
  <node id="132643" label="STAT5A" cy:nodeId="106003">
    <graphics y="-769.8374529393832" z="0.0" x="600.25957662055"/>
  </node>
  <node id="132640" label="TAF1" cy:nodeId="106006">
    <graphics y="322.39588446296057" z="0.0" x="-855.1532346587469"/>
  </node>
  <node id="132641" label="COG1" cy:nodeId="106005">
    <graphics y="1206.1497907129606" z="0.0" x="957.9072511810969"/>
  </node>
  <node id="132638" label="TCF7" cy:nodeId="106008">
    <graphics y="-913.8162127050082" z="0.0" x="161.1413839478205"/>
  </node>
  <node id="132639" label="TCF12" cy:nodeId="106007">
    <graphics y="59.43062872565588" z="0.0" x="-440.55258768609065"/>
  </node>
  <node id="132636" label="TCF7L2" cy:nodeId="106010">
    <graphics y="-755.6550798925082" z="0.0" x="10.248040976018729"/>
  </node>
  <node id="132637" label="TCF7L1" cy:nodeId="106009">
    <graphics y="-752.0332537206332" z="0.0" x="386.14655476996404"/>
  </node>
  <node id="132634" label="ALG5" cy:nodeId="106012">
    <graphics y="1251.8748883692106" z="0.0" x="-1717.7998411040594"/>
  </node>
  <node id="132635" label="TDRD3" cy:nodeId="106011">
    <graphics y="1142.539072939523" z="0.0" x="-1603.9509641509344"/>
  </node>
  <node id="132632" label="GALNT1" cy:nodeId="106014">
    <graphics y="-339.80014520012537" z="0.0" x="-563.6700193267156"/>
  </node>
  <node id="132633" label="TEAD1" cy:nodeId="106013">
    <graphics y="-233.70906167351404" z="0.0" x="-380.0358030181219"/>
  </node>
  <node id="132630" label="TET2" cy:nodeId="106016">
    <graphics y="394.68030829108557" z="0.0" x="-630.9092161040594"/>
  </node>
  <node id="132631" label="TERF1" cy:nodeId="106015">
    <graphics y="937.7848004785856" z="0.0" x="-56.27857035210627"/>
  </node>
  <node id="132628" label="TRIM28" cy:nodeId="106018">
    <graphics y="-220.64536385857264" z="0.0" x="1579.291589560003"/>
  </node>
  <node id="132629" label="TP63" cy:nodeId="106017">
    <graphics y="-732.6854754003207" z="0.0" x="-74.73772257378596"/>
  </node>
  <node id="132626" label="UBTF" cy:nodeId="106020">
    <graphics y="-62.13912682854334" z="0.0" x="1700.6361940521906"/>
  </node>
  <node id="132627" label="TTF2" cy:nodeId="106019">
    <graphics y="801.6010236231168" z="0.0" x="-364.15598124077815"/>
  </node>
  <node id="132624" label="USF2" cy:nodeId="106022">
    <graphics y="-468.99001031243006" z="0.0" x="1466.297937216253"/>
  </node>
  <node id="132625" label="USF1" cy:nodeId="106021">
    <graphics y="-858.2220354589144" z="0.0" x="1520.5839479584406"/>
  </node>
  <node id="132622" label="WDR5" cy:nodeId="106024">
    <graphics y="-109.29932885491053" z="0.0" x="1162.5624025482844"/>
  </node>
  <node id="132623" label="VEZF1" cy:nodeId="106023">
    <graphics y="961.7945661035856" z="0.0" x="-919.2502805571844"/>
  </node>
  <node id="132620" label="YAP1" cy:nodeId="106026">
    <graphics y="-442.28331475578943" z="0.0" x="-165.12851542046565"/>
  </node>
  <node id="132621" label="XRN2" cy:nodeId="106025">
    <graphics y="454.72278875983557" z="0.0" x="-749.8178464751531"/>
  </node>
  <node id="132618" label="YY1" cy:nodeId="106028">
    <graphics y="1441.0050153223356" z="0.0" x="741.1312502045344"/>
  </node>
  <node id="132619" label="GALNT5" cy:nodeId="106027">
    <graphics y="-537.1157427343051" z="0.0" x="-419.5046750884344"/>
  </node>
  <node id="132616" label="B3GALT4" cy:nodeId="106030">
    <graphics y="-734.8627825292269" z="0.0" x="1472.409997763128"/>
  </node>
  <node id="132617" label="ZBTB17" cy:nodeId="106029">
    <graphics y="-469.15392022453943" z="0.0" x="1319.0756471771906"/>
  </node>
  <node id="132614" label="C1GALT1C1" cy:nodeId="106032">
    <graphics y="1102.8267926660856" z="0.0" x="-954.9641477446844"/>
  </node>
  <node id="132615" label="ZBTB33" cy:nodeId="106031">
    <graphics y="793.1258649317106" z="0.0" x="-870.8900510649969"/>
  </node>
  <node id="132962" label="ADNP" cy:nodeId="105684">
    <graphics y="-1485.6719866307894" z="0.0" x="304.07529622504217"/>
  </node>
  <node id="132960" label="AFF4" cy:nodeId="105686">
    <graphics y="378.3991193262418" z="0.0" x="-724.0000974517156"/>
  </node>
  <node id="132961" label="FUT7" cy:nodeId="105685">
    <graphics y="-1166.5762224706332" z="0.0" x="284.3891771454523"/>
  </node>
  <node id="132958" label="STT3B" cy:nodeId="105688">
    <graphics y="477.4326886621793" z="0.0" x="-664.1982786040594"/>
  </node>
  <node id="132959" label="MAN1A2" cy:nodeId="105687">
    <graphics y="517.4044904199918" z="0.0" x="-722.1471311431219"/>
  </node>
  <node id="132956" label="FUT11" cy:nodeId="105690">
    <graphics y="331.42173285163244" z="0.0" x="-657.3212034087469"/>
  </node>
  <node id="132957" label="NEU3" cy:nodeId="105689">
    <graphics y="277.4086408106168" z="0.0" x="-916.7815305571844"/>
  </node>
  <node id="132954" label="COG5" cy:nodeId="105692">
    <graphics y="559.4375104395231" z="0.0" x="-687.5426999907781"/>
  </node>
  <node id="132955" label="ACER2" cy:nodeId="105691">
    <graphics y="414.39185614264807" z="0.0" x="-884.2169553618719"/>
  </node>
  <node id="132952" label="MAN2A1" cy:nodeId="105694">
    <graphics y="409.04871649421057" z="0.0" x="-972.0710813384344"/>
  </node>
  <node id="132953" label="AR" cy:nodeId="105693">
    <graphics y="268.9065656153043" z="0.0" x="-812.2952634673406"/>
  </node>
  <node id="132950" label="SLC35F5" cy:nodeId="105696">
    <graphics y="586.4751080957731" z="0.0" x="-912.0188352446844"/>
  </node>
  <node id="132951" label="SLC35A3" cy:nodeId="105695">
    <graphics y="578.3441266504606" z="0.0" x="-777.4589597564031"/>
  </node>
  <node id="132948" label="ST8SIA6" cy:nodeId="105698">
    <graphics y="125.98075384772619" z="0.0" x="-934.2342893462469"/>
  </node>
  <node id="132949" label="GALNT10" cy:nodeId="105697">
    <graphics y="-113.29252343498865" z="0.0" x="-538.4576780181219"/>
  </node>
  <node id="132946" label="RTF1" cy:nodeId="105700">
    <graphics y="991.4903668848356" z="0.0" x="-1083.8967649321844"/>
  </node>
  <node id="132947" label="ARID2" cy:nodeId="105699">
    <graphics y="1162.603281923898" z="0.0" x="-1244.2532102446844"/>
  </node>
  <node id="132944" label="SLC35A5" cy:nodeId="105702">
    <graphics y="692.6509503809293" z="0.0" x="-1010.9053098540594"/>
  </node>
  <node id="132945" label="ATF1" cy:nodeId="105701">
    <graphics y="573.8479108301481" z="0.0" x="-1095.4695188384344"/>
  </node>
  <node id="132942" label="ATF2" cy:nodeId="105704">
    <graphics y="477.0249738184293" z="0.0" x="-918.4667112212469"/>
  </node>
  <node id="132943" label="GALNT4" cy:nodeId="105703">
    <graphics y="641.5290631738981" z="0.0" x="-1386.255529580622"/>
  </node>
  <node id="132940" label="ATF3" cy:nodeId="105706">
    <graphics y="-452.99876885735193" z="0.0" x="394.9143160004328"/>
  </node>
  <node id="132941" label="UGGT1" cy:nodeId="105705">
    <graphics y="621.4835919824918" z="0.0" x="-746.3515989165594"/>
  </node>
  <node id="132938" label="HAS1" cy:nodeId="105708">
    <graphics y="-700.3456316503207" z="0.0" x="559.9114626068781"/>
  </node>
  <node id="132939" label="B3GNT5" cy:nodeId="105707">
    <graphics y="-546.7081804784457" z="0.0" x="139.401120962591"/>
  </node>
  <node id="132936" label="ATF7IP" cy:nodeId="105710">
    <graphics y="1038.0865582910856" z="0.0" x="-691.5544797759344"/>
  </node>
  <node id="132937" label="HAS2" cy:nodeId="105709">
    <graphics y="-491.6327410253207" z="0.0" x="285.89057332465154"/>
  </node>
  <node id="132934" label="ATRX" cy:nodeId="105712">
    <graphics y="563.1859845606168" z="0.0" x="-1271.4858762603094"/>
  </node>
  <node id="132935" label="ALG10" cy:nodeId="105711">
    <graphics y="756.5250958887418" z="0.0" x="-804.6974241118719"/>
  </node>
  <node id="132932" label="BACH1" cy:nodeId="105714">
    <graphics y="-196.86281304680506" z="0.0" x="-239.78009623101252"/>
  </node>
  <node id="132933" label="FKTN" cy:nodeId="105713">
    <graphics y="530.4746808496793" z="0.0" x="-999.7035276274969"/>
  </node>
  <node id="132930" label="MAN1A1" cy:nodeId="105716">
    <graphics y="-38.95589166008631" z="0.0" x="-231.98093241265315"/>
  </node>
  <node id="132931" label="CSGALNACT2" cy:nodeId="105715">
    <graphics y="-142.7390528234164" z="0.0" x="-323.1832944732"/>
  </node>
  <node id="132928" label="CHST11" cy:nodeId="105718">
    <graphics y="-868.6584978612582" z="0.0" x="97.66440755316717"/>
  </node>
  <node id="132929" label="CHSY1" cy:nodeId="105717">
    <graphics y="-202.92909722649256" z="0.0" x="-448.96237772515315"/>
  </node>
  <node id="132926" label="ST6GAL2" cy:nodeId="105720">
    <graphics y="-242.0721025975863" z="0.0" x="-82.29173868706721"/>
  </node>
  <node id="132927" label="GFPT2" cy:nodeId="105719">
    <graphics y="-614.8306780370394" z="0.0" x="41.40017110297185"/>
  </node>
  <node id="132924" label="DPM3" cy:nodeId="105722">
    <graphics y="-616.7469683202426" z="0.0" x="1451.5194948334406"/>
  </node>
  <node id="132925" label="BATF" cy:nodeId="105721">
    <graphics y="-812.3320208104769" z="0.0" x="1640.3222292084406"/>
  </node>
  <node id="132922" label="MGAT1" cy:nodeId="105724">
    <graphics y="-1085.5087175878207" z="0.0" x="541.6016481537531"/>
  </node>
  <node id="132923" label="BATF3" cy:nodeId="105723">
    <graphics y="-846.2820940526644" z="0.0" x="358.6524294037531"/>
  </node>
  <node id="132920" label="BMI1" cy:nodeId="105726">
    <graphics y="744.2685651270231" z="0.0" x="-1372.5644895415594"/>
  </node>
  <node id="132921" label="BCAT1" cy:nodeId="105725">
    <graphics y="-220.58427529656092" z="0.0" x="147.17975789496404"/>
  </node>
  <node id="132918" label="BRCA1" cy:nodeId="105728">
    <graphics y="943.7094830957731" z="0.0" x="-603.9416868071844"/>
  </node>
  <node id="132919" label="ALG10B" cy:nodeId="105727">
    <graphics y="769.9168805567106" z="0.0" x="-1088.5637571196844"/>
  </node>
  <node id="132916" label="PIGN" cy:nodeId="105730">
    <graphics y="818.9600324121793" z="0.0" x="-769.4924070220281"/>
  </node>
  <node id="132917" label="PIGW" cy:nodeId="105729">
    <graphics y="928.8822125879606" z="0.0" x="-195.78561991265315"/>
  </node>
  <node id="132914" label="SLC35E3" cy:nodeId="105732">
    <graphics y="1138.424326845773" z="0.0" x="-732.7696287017156"/>
  </node>
  <node id="132915" label="FAM20B" cy:nodeId="105731">
    <graphics y="774.4449567285856" z="0.0" x="-675.8594114165594"/>
  </node>
  <node id="132912" label="ALG12" cy:nodeId="105734">
    <graphics y="152.94929022467932" z="0.0" x="2356.7233522553156"/>
  </node>
  <node id="132913" label="BRD1" cy:nodeId="105733">
    <graphics y="70.7618360010465" z="0.0" x="2178.891687216253"/>
  </node>
  <node id="132910" label="C17orf49" cy:nodeId="105736">
    <graphics y="-862.7110491307894" z="0.0" x="1073.8813722748469"/>
  </node>
  <node id="132911" label="PMM1" cy:nodeId="105735">
    <graphics y="-53.68251519524256" z="0.0" x="1917.541833700628"/>
  </node>
  <node id="132908" label="CASP8AP2" cy:nodeId="105738">
    <graphics y="857.0146588770231" z="0.0" x="-1080.0376340728094"/>
  </node>
  <node id="132909" label="HYAL2" cy:nodeId="105737">
    <graphics y="-695.6097918065707" z="0.0" x="971.4834230560969"/>
  </node>
  <node id="132906" label="GALNS" cy:nodeId="105740">
    <graphics y="2094.6214398828824" z="0.0" x="-1524.4256727080633"/>
  </node>
  <node id="132907" label="CBFB" cy:nodeId="105739">
    <graphics y="2085.3238629785856" z="0.0" x="-1623.9924985747625"/>
  </node>
  <node id="132904" label="CMAS" cy:nodeId="105742">
    <graphics y="2094.6214398828824" z="0.0" x="-1324.858846841364"/>
  </node>
  <node id="132905" label="CBX3" cy:nodeId="105741">
    <graphics y="2085.3238629785856" z="0.0" x="-1424.4256727080633"/>
  </node>
  <node id="132902" label="RFNG" cy:nodeId="105744">
    <graphics y="-404.4241228612582" z="0.0" x="1491.780359091253"/>
  </node>
  <node id="132903" label="CBX4" cy:nodeId="105743">
    <graphics y="-432.7584581884066" z="0.0" x="1769.521814169378"/>
  </node>
  <node id="132900" label="ST6GALNAC6" cy:nodeId="105746">
    <graphics y="-609.0283403905551" z="0.0" x="820.2290895600031"/>
  </node>
  <node id="132901" label="CBX7" cy:nodeId="105745">
    <graphics y="-540.5459795507113" z="0.0" x="869.8426149506281"/>
  </node>
  <node id="132898" label="MAN2A2" cy:nodeId="105748">
    <graphics y="-396.75360589348475" z="0.0" x="882.3390138764094"/>
  </node>
  <node id="132899" label="ST3GAL3" cy:nodeId="105747">
    <graphics y="-505.33034234368006" z="0.0" x="1038.1195924896906"/>
  </node>
  <node id="132896" label="MGAT3" cy:nodeId="105750">
    <graphics y="-630.4647722753207" z="0.0" x="530.1805360932062"/>
  </node>
  <node id="132897" label="IDUA" cy:nodeId="105749">
    <graphics y="-611.2902117284457" z="0.0" x="1234.037195028753"/>
  </node>
  <node id="132894" label="CBX8" cy:nodeId="105752">
    <graphics y="-274.5632601293246" z="0.0" x="1641.274011435003"/>
  </node>
  <node id="132895" label="HYAL1" cy:nodeId="105751">
    <graphics y="-692.9274797948519" z="0.0" x="632.2560670990656"/>
  </node>
  <node id="132892" label="B3GAT3" cy:nodeId="105754">
    <graphics y="-365.18634515129725" z="0.0" x="1574.230310263128"/>
  </node>
  <node id="132893" label="GALK1" cy:nodeId="105753">
    <graphics y="-144.80864434563318" z="0.0" x="1545.947595419378"/>
  </node>
  <node id="132890" label="CDK8" cy:nodeId="105756">
    <graphics y="549.0225324121793" z="0.0" x="-483.37534159234065"/>
  </node>
  <node id="132891" label="CCDC101" cy:nodeId="105755">
    <graphics y="-433.09943108879725" z="0.0" x="1898.1098268646906"/>
  </node>
  <node id="132888" label="DPM2" cy:nodeId="105758">
    <graphics y="-87.187993100516" z="0.0" x="1290.703698935003"/>
  </node>
  <node id="132889" label="CDK9" cy:nodeId="105757">
    <graphics y="-422.0363359960238" z="0.0" x="1228.236413778753"/>
  </node>
  <node id="132886" label="MAN1B1" cy:nodeId="105760">
    <graphics y="-207.1229525121371" z="0.0" x="1179.8791139740656"/>
  </node>
  <node id="132887" label="PIGQ" cy:nodeId="105759">
    <graphics y="-359.9344072850863" z="0.0" x="1299.090417685003"/>
  </node>
  <node id="132884" label="MOGS" cy:nodeId="105762">
    <graphics y="-549.4773760350863" z="0.0" x="1517.3905885834406"/>
  </node>
  <node id="132885" label="POMT1" cy:nodeId="105761">
    <graphics y="-292.71982293450037" z="0.0" x="1117.848474325628"/>
  </node>
  <node id="132882" label="CEBPA" cy:nodeId="105764">
    <graphics y="-1239.774403622977" z="0.0" x="460.55690938422185"/>
  </node>
  <node id="132883" label="CHST12" cy:nodeId="105763">
    <graphics y="-631.2642107518832" z="0.0" x="1095.915368856878"/>
  </node>
  <node id="132880" label="MFNG" cy:nodeId="105766">
    <graphics y="-920.6941423925082" z="0.0" x="430.00820332953435"/>
  </node>
  <node id="132881" label="NAGK" cy:nodeId="105765">
    <graphics y="-1518.9864397557894" z="0.0" x="542.3344667572687"/>
  </node>
  <node id="132878" label="A4GALT" cy:nodeId="105768">
    <graphics y="-1052.3555803807894" z="0.0" x="1108.7492921967219"/>
  </node>
  <node id="132879" label="CEBPB" cy:nodeId="105767">
    <graphics y="-934.4398699315707" z="0.0" x="1191.6875246185969"/>
  </node>
  <node id="132876" label="CHD2" cy:nodeId="105770">
    <graphics y="-127.41767220818201" z="0.0" x="-1242.054845986872"/>
  </node>
  <node id="132877" label="CHD1" cy:nodeId="105769">
    <graphics y="671.5066022363981" z="0.0" x="-904.8163205962469"/>
  </node>
  <node id="132874" label="NDST2" cy:nodeId="105772">
    <graphics y="-136.7504702123324" z="0.0" x="-1100.920812783747"/>
  </node>
  <node id="132875" label="OGT" cy:nodeId="105771">
    <graphics y="2.516322085030879" z="0.0" x="-1157.430578408747"/>
  </node>
  <node id="132872" label="CHD8" cy:nodeId="105774">
    <graphics y="429.8205060449918" z="0.0" x="-822.1840574126531"/>
  </node>
  <node id="132873" label="CHD4" cy:nodeId="105773">
    <graphics y="146.34287542975744" z="0.0" x="-1164.014318643122"/>
  </node>
  <node id="132870" label="LAMP3" cy:nodeId="105776">
    <graphics y="-1160.4321795018832" z="0.0" x="66.65474111029607"/>
  </node>
  <node id="132871" label="CIITA" cy:nodeId="105775">
    <graphics y="-1059.4135027440707" z="0.0" x="58.91340047308904"/>
  </node>
  <node id="132868" label="GAL3ST4" cy:nodeId="105778">
    <graphics y="-976.2546282323519" z="0.0" x="-87.40210550835627"/>
  </node>
  <node id="132869" label="MAN2B1" cy:nodeId="105777">
    <graphics y="-1132.0538836034457" z="0.0" x="360.4867036957453"/>
  </node>
  <node id="132866" label="CPSF3L" cy:nodeId="105780">
    <graphics y="-318.8746691259066" z="0.0" x="1469.4635866303156"/>
  </node>
  <node id="132867" label="DSE" cy:nodeId="105779">
    <graphics y="-639.8542070897738" z="0.0" x="-91.65003031304377"/>
  </node>
  <node id="132864" label="B4GALT7" cy:nodeId="105782">
    <graphics y="-414.4645586522738" z="0.0" x="1396.131189169378"/>
  </node>
  <node id="132865" label="B3GALT6" cy:nodeId="105781">
    <graphics y="-334.95729546868006" z="0.0" x="1381.209802450628"/>
  </node>
  <node id="132862" label="B4GALNT4" cy:nodeId="105784">
    <graphics y="-282.3475161107699" z="0.0" x="1525.8351686615656"/>
  </node>
  <node id="132863" label="POMGNT1" cy:nodeId="105783">
    <graphics y="-51.448430112234746" z="0.0" x="1578.4516237396906"/>
  </node>
  <node id="132860" label="CREB3" cy:nodeId="105786">
    <graphics y="2085.3238629785856" z="0.0" x="-1224.858846841364"/>
  </node>
  <node id="132861" label="CREB1" cy:nodeId="105785">
    <graphics y="393.6787824121793" z="0.0" x="-360.75436991265315"/>
  </node>
  <node id="132858" label="CREB3L4" cy:nodeId="105788">
    <graphics y="-1152.323964169852" z="0.0" x="1941.6923463959406"/>
  </node>
  <node id="132859" label="GMPPA" cy:nodeId="105787">
    <graphics y="2094.6214398828824" z="0.0" x="-1125.2920209746649"/>
  </node>
  <node id="132856" label="CREBBP" cy:nodeId="105790">
    <graphics y="451.4126691309293" z="0.0" x="-520.2090207915594"/>
  </node>
  <node id="132857" label="B4GALT3" cy:nodeId="105789">
    <graphics y="-1105.4310198339144" z="0.0" x="1785.014001669378"/>
  </node>
  <node id="132854" label="POFUT1" cy:nodeId="105792">
    <graphics y="616.3235578028043" z="0.0" x="-537.7330076079656"/>
  </node>
  <node id="132855" label="COG7" cy:nodeId="105791">
    <graphics y="519.2254132715543" z="0.0" x="159.8898389954279"/>
  </node>
  <node id="132852" label="CTNNB1" cy:nodeId="105794">
    <graphics y="179.22703070319494" z="0.0" x="-681.1468870024969"/>
  </node>
  <node id="132853" label="CTBP1" cy:nodeId="105793">
    <graphics y="-545.7150774511019" z="0.0" x="1430.1169069428156"/>
  </node>
  <node id="132850" label="E2F1" cy:nodeId="105796">
    <graphics y="1162.5626325098356" z="0.0" x="278.08993703314763"/>
  </node>
  <node id="132851" label="DEK" cy:nodeId="105795">
    <graphics y="1065.731944033273" z="0.0" x="-822.2104246001531"/>
  </node>
  <node id="132848" label="SLC35B1" cy:nodeId="105798">
    <graphics y="1024.3729352442106" z="0.0" x="651.2136171478937"/>
  </node>
  <node id="132849" label="ALG3" cy:nodeId="105797">
    <graphics y="1209.240000673898" z="0.0" x="404.95990926215154"/>
  </node>
  <node id="132846" label="KHK" cy:nodeId="105800">
    <graphics y="1316.2325543848356" z="0.0" x="224.19582539984685"/>
  </node>
  <node id="132847" label="DPM1" cy:nodeId="105799">
    <graphics y="1318.5135602442106" z="0.0" x="390.71230489203435"/>
  </node>
  <node id="132844" label="FUT1" cy:nodeId="105802">
    <graphics y="2094.6214398828824" z="0.0" x="-925.7251951079656"/>
  </node>
  <node id="132845" label="E2F6" cy:nodeId="105801">
    <graphics y="2085.3238629785856" z="0.0" x="-1025.2920209746649"/>
  </node>
  <node id="132842" label="EBF1" cy:nodeId="105804">
    <graphics y="-634.3815508397738" z="0.0" x="321.94455892035467"/>
  </node>
  <node id="132843" label="E2F7" cy:nodeId="105803">
    <graphics y="1155.003916689523" z="0.0" x="-121.38312357476252"/>
  </node>
  <node id="132840" label="ST3GAL2" cy:nodeId="105806">
    <graphics y="-719.6079607518832" z="0.0" x="480.8725221771906"/>
  </node>
  <node id="132841" label="CSGALNACT1" cy:nodeId="105805">
    <graphics y="-655.7636004003207" z="0.0" x="225.0994165558527"/>
  </node>
  <node id="132838" label="B3GALT2" cy:nodeId="105808">
    <graphics y="-685.7446489843051" z="0.0" x="156.75984078833562"/>
  </node>
  <node id="132839" label="CHST3" cy:nodeId="105807">
    <graphics y="-617.2143755468051" z="0.0" x="152.05044919440252"/>
  </node>
  <node id="132836" label="FUT4" cy:nodeId="105810">
    <graphics y="-785.8953753026644" z="0.0" x="144.87144261786443"/>
  </node>
  <node id="132837" label="TPST1" cy:nodeId="105809">
    <graphics y="-585.3047380956332" z="0.0" x="253.72379476019842"/>
  </node>
  <node id="132834" label="GALNT12" cy:nodeId="105812">
    <graphics y="-562.6510820897738" z="0.0" x="379.35997945258123"/>
  </node>
  <node id="132835" label="ST3GAL6" cy:nodeId="105811">
    <graphics y="-760.9873552831332" z="0.0" x="83.86374074408513"/>
  </node>
  <node id="132832" label="EGR1" cy:nodeId="105814">
    <graphics y="-547.3250628026644" z="0.0" x="208.1595438141535"/>
  </node>
  <node id="132833" label="EGLN2" cy:nodeId="105813">
    <graphics y="-513.3784685643832" z="0.0" x="1666.1650026459406"/>
  </node>
  <node id="132830" label="EGR2" cy:nodeId="105816">
    <graphics y="-701.9211931737582" z="0.0" x="335.26088887640935"/>
  </node>
  <node id="132831" label="ST6GALNAC3" cy:nodeId="105815">
    <graphics y="-756.2839861425082" z="0.0" x="304.6093843598078"/>
  </node>
  <node id="132828" label="B3GALT1" cy:nodeId="105818">
    <graphics y="-1032.4384050878207" z="0.0" x="459.4904420990656"/>
  </node>
  <node id="132829" label="HPSE2" cy:nodeId="105817">
    <graphics y="-967.4477434667269" z="0.0" x="519.9566286225031"/>
  </node>
  <node id="132826" label="UAP1" cy:nodeId="105820">
    <graphics y="308.37769598639807" z="0.0" x="-1610.6235715728094"/>
  </node>
  <node id="132827" label="EHF" cy:nodeId="105819">
    <graphics y="333.53135199225744" z="0.0" x="-1410.7842161040594"/>
  </node>
  <node id="132824" label="ELF1" cy:nodeId="105822">
    <graphics y="692.0168561426481" z="0.0" x="-1093.3330442290594"/>
  </node>
  <node id="132825" label="EHMT2" cy:nodeId="105821">
    <graphics y="-697.5328875096957" z="0.0" x="1796.328943075628"/>
  </node>
  <node id="132822" label="COG6" cy:nodeId="105824">
    <graphics y="937.2312116113981" z="0.0" x="-1395.318762002497"/>
  </node>
  <node id="132823" label="COG3" cy:nodeId="105823">
    <graphics y="655.2065534082731" z="0.0" x="-1189.846105752497"/>
  </node>
  <node id="132820" label="ELK3" cy:nodeId="105826">
    <graphics y="223.8738202539762" z="0.0" x="-466.6859495024969"/>
  </node>
  <node id="132821" label="ELF2" cy:nodeId="105825">
    <graphics y="968.8016461817106" z="0.0" x="-1245.303869424372"/>
  </node>
  <node id="132818" label="ELL" cy:nodeId="105828">
    <graphics y="-602.6025286229769" z="0.0" x="986.6134889740656"/>
  </node>
  <node id="132819" label="ELK4" cy:nodeId="105827">
    <graphics y="519.1579083887418" z="0.0" x="-787.6371824126531"/>
  </node>
  <node id="132816" label="ERCC6" cy:nodeId="105830">
    <graphics y="555.3790997949918" z="0.0" x="-853.3843137603094"/>
  </node>
  <node id="132817" label="EP400" cy:nodeId="105829">
    <graphics y="264.77088446296057" z="0.0" x="-1095.325842080622"/>
  </node>
  <node id="132814" label="ERG" cy:nodeId="105832">
    <graphics y="-716.5211077245394" z="0.0" x="227.97671300360662"/>
  </node>
  <node id="132815" label="ERF" cy:nodeId="105831">
    <graphics y="-507.18813042961756" z="0.0" x="1212.7284792084406"/>
  </node>
  <node id="132812" label="ST8SIA4" cy:nodeId="105834">
    <graphics y="-999.1642351659457" z="0.0" x="179.04606658408147"/>
  </node>
  <node id="132813" label="CHSY3" cy:nodeId="105833">
    <graphics y="-564.7887468846957" z="0.0" x="-36.99230021050471"/>
  </node>
  <node id="132810" label="UST" cy:nodeId="105836">
    <graphics y="-669.7201433690707" z="0.0" x="-3.229330239801584"/>
  </node>
  <node id="132811" label="CHST7" cy:nodeId="105835">
    <graphics y="-792.8862810643832" z="0.0" x="442.1680544037531"/>
  </node>
  <node id="132808" label="CHST2" cy:nodeId="105838">
    <graphics y="-855.9301653417269" z="0.0" x="437.80352193305"/>
  </node>
  <node id="132809" label="SULT1C4" cy:nodeId="105837">
    <graphics y="-929.2593889745394" z="0.0" x="330.9575288910578"/>
  </node>
  <node id="132806" label="ST8SIA1" cy:nodeId="105840">
    <graphics y="-934.8455095800082" z="0.0" x="230.48015004584295"/>
  </node>
  <node id="132807" label="ETS1" cy:nodeId="105839">
    <graphics y="-774.5025530370394" z="0.0" x="223.0009630341242"/>
  </node>
  <node id="132804" label="ETV1" cy:nodeId="105842">
    <graphics y="-545.4518328221957" z="0.0" x="-116.37183207085627"/>
  </node>
  <node id="132805" label="HS3ST3B1" cy:nodeId="105841">
    <graphics y="-958.2571917089144" z="0.0" x="90.89637929388982"/>
  </node>
  <node id="132802" label="EXTL2" cy:nodeId="105844">
    <graphics y="-404.62840752922693" z="0.0" x="-356.1876584868719"/>
  </node>
  <node id="132803" label="ARSB" cy:nodeId="105843">
    <graphics y="-727.8298235448519" z="0.0" x="-171.96881693413752"/>
  </node>
  <node id="132800" label="EZH1" cy:nodeId="105846">
    <graphics y="-211.39561562859217" z="0.0" x="-1192.636144814997"/>
  </node>
  <node id="132801" label="SLC35B4" cy:nodeId="105845">
    <graphics y="-326.392338803641" z="0.0" x="-233.13690775445002"/>
  </node>
  <node id="132798" label="FLI1" cy:nodeId="105848">
    <graphics y="-872.5479631932894" z="0.0" x="234.88730794379217"/>
  </node>
  <node id="132799" label="FANCD2" cy:nodeId="105847">
    <graphics y="1053.9193219629606" z="0.0" x="-65.6619016509344"/>
  </node>
  <node id="132796" label="FOXA1" cy:nodeId="105850">
    <graphics y="1094.531992861398" z="0.0" x="-2141.3052121978094"/>
  </node>
  <node id="132797" label="FOS" cy:nodeId="105849">
    <graphics y="-264.12276940666834" z="0.0" x="282.2678392548273"/>
  </node>
  <node id="132794" label="PIGH" cy:nodeId="105852">
    <graphics y="1160.545908877023" z="0.0" x="-2302.0300657134344"/>
  </node>
  <node id="132795" label="GLCE" cy:nodeId="105851">
    <graphics y="1005.5987653223356" z="0.0" x="-1923.4570676665594"/>
  </node>
  <node id="132792" label="RPN2" cy:nodeId="105854">
    <graphics y="1159.657237002023" z="0.0" x="532.7061403412531"/>
  </node>
  <node id="132793" label="FOXM1" cy:nodeId="105853">
    <graphics y="1106.714365908273" z="0.0" x="406.5312593598078"/>
  </node>
  <node id="132790" label="FOXO1" cy:nodeId="105856">
    <graphics y="-603.7739763768832" z="0.0" x="96.72883778998357"/>
  </node>
  <node id="132791" label="GNPNAT1" cy:nodeId="105855">
    <graphics y="1318.090830752023" z="0.0" x="636.6695192475031"/>
  </node>
  <node id="132788" label="FOXP3" cy:nodeId="105858">
    <graphics y="-1110.1323748143832" z="0.0" x="208.06094914862615"/>
  </node>
  <node id="132789" label="DSEL" cy:nodeId="105857">
    <graphics y="-445.56847100578943" z="0.0" x="-71.81250589898127"/>
  </node>
  <node id="132786" label="NPL" cy:nodeId="105860">
    <graphics y="-1270.069813779227" z="0.0" x="131.76994496771795"/>
  </node>
  <node id="132787" label="HK3" cy:nodeId="105859">
    <graphics y="-1348.8506975682894" z="0.0" x="68.25961476752263"/>
  </node>
  <node id="132784" label="GATA6" cy:nodeId="105862">
    <graphics y="-1160.9686785253207" z="0.0" x="663.0061586518"/>
  </node>
  <node id="132785" label="GABPA" cy:nodeId="105861">
    <graphics y="609.4446515528043" z="0.0" x="-987.0288450103094"/>
  </node>
  <node id="132782" label="ALG13" cy:nodeId="105864">
    <graphics y="718.7120465723356" z="0.0" x="447.484430136175"/>
  </node>
  <node id="132783" label="GATAD1" cy:nodeId="105863">
    <graphics y="635.5446881738981" z="0.0" x="340.11892110297185"/>
  </node>
  <node id="132780" label="GLYR1" cy:nodeId="105866">
    <graphics y="379.69532293952307" z="0.0" x="605.4081667084406"/>
  </node>
  <node id="132781" label="GLI2" cy:nodeId="105865">
    <graphics y="-963.9720964940707" z="0.0" x="666.0039919037531"/>
  </node>
  <node id="132778" label="GTF2B" cy:nodeId="105868">
    <graphics y="2085.3238629785856" z="0.0" x="-2222.69297617486"/>
  </node>
  <node id="132779" label="ALG1" cy:nodeId="105867">
    <graphics y="162.64008612311682" z="0.0" x="996.5273073334406"/>
  </node>
  <node id="132776" label="GTF2F1" cy:nodeId="105870">
    <graphics y="-467.82677178703943" z="0.0" x="1544.2421510834406"/>
  </node>
  <node id="132777" label="CTBS" cy:nodeId="105869">
    <graphics y="2094.6214398828824" z="0.0" x="-2123.126150308161"/>
  </node>
  <node id="132774" label="H2AFX" cy:nodeId="105872">
    <graphics y="-83.61406426750818" z="0.0" x="1448.2685182709406"/>
  </node>
  <node id="132775" label="GTF2I" cy:nodeId="105871">
    <graphics y="710.2240094629606" z="0.0" x="-754.9923459868719"/>
  </node>
  <node id="132772" label="PIGO" cy:nodeId="105874">
    <graphics y="-19.25130181633631" z="0.0" x="-1476.0918332915594"/>
  </node>
  <node id="132773" label="HCFC1" cy:nodeId="105873">
    <graphics y="23.594920107491816" z="0.0" x="-1257.333898721247"/>
  </node>
  <node id="132770" label="HES4" cy:nodeId="105876">
    <graphics y="-366.47809319817225" z="0.0" x="1681.379480185003"/>
  </node>
  <node id="132771" label="HECTD1" cy:nodeId="105875">
    <graphics y="333.2891034571012" z="0.0" x="-460.4072629790594"/>
  </node>
  <node id="132768" label="DPAGT1" cy:nodeId="105878">
    <graphics y="2094.6214398828824" z="0.0" x="-1923.5593244414617"/>
  </node>
  <node id="132769" label="HINFP" cy:nodeId="105877">
    <graphics y="2085.3238629785856" z="0.0" x="-2023.126150308161"/>
  </node>
  <node id="132766" label="TSTA3" cy:nodeId="105880">
    <graphics y="-200.2317591222445" z="0.0" x="1973.461999716253"/>
  </node>
  <node id="132767" label="HSF1" cy:nodeId="105879">
    <graphics y="-231.6148157628695" z="0.0" x="1731.976159872503"/>
  </node>
  <node id="132764" label="IKZF1" cy:nodeId="105882">
    <graphics y="-1115.9302874120394" z="0.0" x="121.3378770966242"/>
  </node>
  <node id="132765" label="GPAA1" cy:nodeId="105881">
    <graphics y="-140.6774073156039" z="0.0" x="1787.939782919378"/>
  </node>
  <node id="132762" label="LIPA" cy:nodeId="105884">
    <graphics y="-1201.0809832128207" z="0.0" x="-179.29269999077815"/>
  </node>
  <node id="132763" label="GM2A" cy:nodeId="105883">
    <graphics y="-1261.328846982352" z="0.0" x="-96.20032328179377"/>
  </node>
  <node id="132760" label="INTS3" cy:nodeId="105886">
    <graphics y="-1252.4957170995394" z="0.0" x="1845.4464967865656"/>
  </node>
  <node id="132761" label="INO80" cy:nodeId="105885">
    <graphics y="1215.8431500879606" z="0.0" x="-1132.828771768122"/>
  </node>
  <node id="132758" label="IRF4" cy:nodeId="105888">
    <graphics y="-1015.8745623143832" z="0.0" x="238.00060445258123"/>
  </node>
  <node id="132759" label="IRF1" cy:nodeId="105887">
    <graphics y="-1473.2408342870394" z="0.0" x="-32.42600077202815"/>
  </node>
  <node id="132756" label="IRF8" cy:nodeId="105890">
    <graphics y="-1100.2769670995394" z="0.0" x="-99.53265970757502"/>
  </node>
  <node id="132757" label="IRF5" cy:nodeId="105889">
    <graphics y="-1425.227040341727" z="0.0" x="173.82442909666997"/>
  </node>
  <node id="132754" label="JMJD1C" cy:nodeId="105892">
    <graphics y="-66.9555483373324" z="0.0" x="-693.5655271392156"/>
  </node>
  <node id="132755" label="JDP2" cy:nodeId="105891">
    <graphics y="-1332.904042294852" z="0.0" x="714.4206178803156"/>
  </node>
  <node id="132752" label="JMJD6" cy:nodeId="105894">
    <graphics y="485.06519598639807" z="0.0" x="1123.6792238373469"/>
  </node>
  <node id="132753" label="MGAT5" cy:nodeId="105893">
    <graphics y="6.4416608301480665" z="0.0" x="-861.5239621978094"/>
  </node>
  <node id="132750" label="FKRP" cy:nodeId="105896">
    <graphics y="-743.5433245214144" z="0.0" x="1031.7272585053156"/>
  </node>
  <node id="132751" label="JUN" cy:nodeId="105895">
    <graphics y="-787.2242937596957" z="0.0" x="808.0221803803156"/>
  </node>
  <node id="132748" label="JUNB" cy:nodeId="105898">
    <graphics y="-729.4490252050082" z="0.0" x="742.1837404389094"/>
  </node>
  <node id="132749" label="GBGT1" cy:nodeId="105897">
    <graphics y="-775.7836199315707" z="0.0" x="683.5550783295344"/>
  </node>
  <node id="132746" label="KAT5" cy:nodeId="105900">
    <graphics y="-316.7749529393832" z="0.0" x="1850.773767294378"/>
  </node>
  <node id="132747" label="JUND" cy:nodeId="105899">
    <graphics y="-581.1727495702426" z="0.0" x="1306.247644247503"/>
  </node>
  <node id="132744" label="GNB1" cy:nodeId="105902">
    <graphics y="2094.6214398828824" z="0.0" x="-1723.9924985747625"/>
  </node>
  <node id="132745" label="KDM1A" cy:nodeId="105901">
    <graphics y="2085.3238629785856" z="0.0" x="-1823.5593244414617"/>
  </node>
  <node id="132742" label="KDM5A" cy:nodeId="105904">
    <graphics y="606.6782941309293" z="0.0" x="-833.9701902251531"/>
  </node>
  <node id="132743" label="KDM3A" cy:nodeId="105903">
    <graphics y="460.9688214746793" z="0.0" x="-1308.1736204009344"/>
  </node>
  <node id="132740" label="HS2ST1" cy:nodeId="105906">
    <graphics y="245.00315375006994" z="0.0" x="-351.7590696196844"/>
  </node>
  <node id="132741" label="GNS" cy:nodeId="105905">
    <graphics y="897.4202985254606" z="0.0" x="-983.8996946196844"/>
  </node>
  <node id="132738" label="B3GALNT2" cy:nodeId="105908">
    <graphics y="831.4018659082731" z="0.0" x="-542.7530271392156"/>
  </node>
  <node id="132739" label="KDM5B" cy:nodeId="105907">
    <graphics y="695.8084210840543" z="0.0" x="-695.1725828032781"/>
  </node>
  <node id="132736" label="HS3ST1" cy:nodeId="105910">
    <graphics y="-1053.2166643651644" z="0.0" x="754.9677980560969"/>
  </node>
  <node id="132737" label="LMO2" cy:nodeId="105909">
    <graphics y="-838.7371721776644" z="0.0" x="548.5645387787531"/>
  </node>
  <node id="132734" label="RENBP" cy:nodeId="105912">
    <graphics y="-1145.6573381932894" z="0.0" x="884.1935060639094"/>
  </node>
  <node id="132735" label="LYL1" cy:nodeId="105911">
    <graphics y="-871.9895525487582" z="0.0" x="742.5109499115656"/>
  </node>
  <node id="132732" label="MAFB" cy:nodeId="105914">
    <graphics y="-598.2711992772738" z="0.0" x="-183.5896360259344"/>
  </node>
  <node id="132733" label="CHST13" cy:nodeId="105913">
    <graphics y="-1051.7755022557894" z="0.0" x="945.6002443451594"/>
  </node>
  <node id="132730" label="MAZ" cy:nodeId="105916">
    <graphics y="-176.57441561543146" z="0.0" x="1365.898767294378"/>
  </node>
  <node id="132731" label="MAX" cy:nodeId="105915">
    <graphics y="1209.808604189523" z="0.0" x="-2422.2598020415594"/>
  </node>
  <node id="132728" label="MGAT4B" cy:nodeId="105918">
    <graphics y="67.15757269538244" z="0.0" x="1433.555261435003"/>
  </node>
  <node id="132729" label="B4GALT2" cy:nodeId="105917">
    <graphics y="-220.7196093114535" z="0.0" x="1434.0546510834406"/>
  </node>
  <node id="132726" label="ST6GALNAC1" cy:nodeId="105920">
    <graphics y="-481.21812920891443" z="0.0" x="611.0722902435969"/>
  </node>
  <node id="132727" label="MECOM" cy:nodeId="105919">
    <graphics y="-489.42381768547693" z="0.0" x="518.8684328217219"/>
  </node>
  <node id="132724" label="IDS" cy:nodeId="105922">
    <graphics y="55.51143927253088" z="0.0" x="200.90672284552556"/>
  </node>
  <node id="132725" label="MECP2" cy:nodeId="105921">
    <graphics y="69.79529852546057" z="0.0" x="477.38491231390935"/>
  </node>
  <node id="132722" label="MED1" cy:nodeId="105924">
    <graphics y="654.0398053613981" z="0.0" x="-306.63437479546565"/>
  </node>
  <node id="132723" label="NDST1" cy:nodeId="105923">
    <graphics y="-32.41493707024256" z="0.0" x="702.2420900482844"/>
  </node>
  <node id="132720" label="MEF2C" cy:nodeId="105926">
    <graphics y="-682.2568560155551" z="0.0" x="84.42204457709295"/>
  </node>
  <node id="132721" label="MEF2A" cy:nodeId="105925">
    <graphics y="-85.30872826897303" z="0.0" x="-116.13825052788752"/>
  </node>
  <node id="132718" label="MEIS1" cy:nodeId="105928">
    <graphics y="-411.20432000481287" z="0.0" x="249.03567677924138"/>
  </node>
  <node id="132719" label="SLC35F1" cy:nodeId="105927">
    <graphics y="-860.4544573339144" z="0.0" x="-235.1377317290594"/>
  </node>
  <node id="132716" label="CHST6" cy:nodeId="105930">
    <graphics y="-964.4834490331332" z="0.0" x="-355.9844114165594"/>
  </node>
  <node id="132717" label="MITF" cy:nodeId="105929">
    <graphics y="-808.7748919042269" z="0.0" x="-94.03760355523127"/>
  </node>
  <node id="132714" label="MSX1" cy:nodeId="105932">
    <graphics y="-945.8029680761019" z="0.0" x="882.9051149506281"/>
  </node>
  <node id="132715" label="MRE11A" cy:nodeId="105931">
    <graphics y="125.31327337897619" z="0.0" x="-1060.626867471247"/>
  </node>
  <node id="132712" label="MYBL1" cy:nodeId="105934">
    <graphics y="1094.9166364160856" z="0.0" x="-223.71301859429377"/>
  </node>
  <node id="132713" label="MXD3" cy:nodeId="105933">
    <graphics y="-682.2624102147738" z="0.0" x="1681.997400106878"/>
  </node>
  <node id="132710" label="RPN1" cy:nodeId="105936">
    <graphics y="1448.0350446192106" z="0.0" x="544.567437948675"/>
  </node>
  <node id="132711" label="MYBL2" cy:nodeId="105935">
    <graphics y="1261.7535504785856" z="0.0" x="522.9680421967219"/>
  </node>
  <node id="132708" label="HS3ST4" cy:nodeId="105938">
    <graphics y="-1375.627919247977" z="0.0" x="442.4047487396906"/>
  </node>
  <node id="132709" label="MYH11" cy:nodeId="105937">
    <graphics y="-1026.0584002050082" z="0.0" x="377.9672945160578"/>
  </node>
  <node id="132706" label="SLC35F3" cy:nodeId="105940">
    <graphics y="-1316.414784482352" z="0.0" x="344.7998445648859"/>
  </node>
  <node id="132707" label="CHST9" cy:nodeId="105939">
    <graphics y="-1321.6924944432894" z="0.0" x="554.6995485443781"/>
  </node>
  <node id="132704" label="MZF1" cy:nodeId="105942">
    <graphics y="-637.6285601171176" z="0.0" x="1379.3100221771906"/>
  </node>
  <node id="132705" label="HAS3" cy:nodeId="105941">
    <graphics y="-983.8682756932894" z="0.0" x="4.151803793401541"/>
  </node>
  <node id="132702" label="NFATC1" cy:nodeId="105944">
    <graphics y="-1197.5467424901644" z="0.0" x="558.8908937592219"/>
  </node>
  <node id="132703" label="NFAT5" cy:nodeId="105943">
    <graphics y="366.3178204981168" z="0.0" x="-1193.261388955622"/>
  </node>
  <node id="132700" label="NFYC" cy:nodeId="105946">
    <graphics y="-712.6146135839144" z="0.0" x="1160.3778932709406"/>
  </node>
  <node id="132701" label="NFIC" cy:nodeId="105945">
    <graphics y="-187.8424988301913" z="0.0" x="-931.1467649321844"/>
  </node>
  <node id="132698" label="NPAT" cy:nodeId="105948">
    <graphics y="81.51829046881994" z="0.0" x="-674.3886472564031"/>
  </node>
  <node id="132699" label="NIPBL" cy:nodeId="105947">
    <graphics y="162.42206854499182" z="0.0" x="-809.8195554595281"/>
  </node>
  <node id="132696" label="SLC35D1" cy:nodeId="105950">
    <graphics y="113.55369085944494" z="0.0" x="-567.8305417876531"/>
  </node>
  <node id="132697" label="NR2C2" cy:nodeId="105949">
    <graphics y="360.8148908106168" z="0.0" x="-792.0962278228094"/>
  </node>
  <node id="132694" label="NR5A2" cy:nodeId="105952">
    <graphics y="-817.9012346776644" z="0.0" x="267.70919972846013"/>
  </node>
  <node id="132695" label="NR2F1" cy:nodeId="105951">
    <graphics y="-480.6992693456332" z="0.0" x="170.08552199789983"/>
  </node>
  <node id="132692" label="PIGM" cy:nodeId="105954">
    <graphics y="992.1103620020231" z="0.0" x="-458.60922831109065"/>
  </node>
  <node id="132693" label="PBX1" cy:nodeId="105953">
    <graphics y="750.9040631738981" z="0.0" x="-601.3693601470281"/>
  </node>
  <node id="132690" label="PHF20" cy:nodeId="105956">
    <graphics y="681.7456159082731" z="0.0" x="-459.13510721734065"/>
  </node>
  <node id="132691" label="PCGF1" cy:nodeId="105955">
    <graphics y="-542.6090899022738" z="0.0" x="1781.8678835053156"/>
  </node>
  <node id="132688" label="PIAS1" cy:nodeId="105958">
    <graphics y="490.0270490137418" z="0.0" x="-859.9603635649969"/>
  </node>
  <node id="132689" label="PHF6" cy:nodeId="105957">
    <graphics y="897.3486432520231" z="0.0" x="-735.6848508696844"/>
  </node>
  <node id="132686" label="POLR3A" cy:nodeId="105960">
    <graphics y="23.85428900397619" z="0.0" x="-966.5806028228094"/>
  </node>
  <node id="132687" label="POLR2B" cy:nodeId="105959">
    <graphics y="435.2982892481168" z="0.0" x="-1067.2734739165594"/>
  </node>
  <node id="132684" label="PRDM1" cy:nodeId="105962">
    <graphics y="-515.0804949315707" z="0.0" x="39.645608725042166"/>
  </node>
  <node id="132685" label="PPARG" cy:nodeId="105961">
    <graphics y="-633.1264544042269" z="0.0" x="430.2091615814875"/>
  </node>
  <node id="132682" label="RAC3" cy:nodeId="105964">
    <graphics y="88.90751166022619" z="0.0" x="1676.045495810003"/>
  </node>
  <node id="132683" label="PRKDC" cy:nodeId="105963">
    <graphics y="697.9702863184293" z="0.0" x="-561.2263547759344"/>
  </node>
  <node id="132680" label="UGGT2" cy:nodeId="105966">
    <graphics y="976.1955670801481" z="0.0" x="-1503.2654172759344"/>
  </node>
  <node id="132681" label="RB1" cy:nodeId="105965">
    <graphics y="841.2016095606168" z="0.0" x="-1316.5723020415594"/>
  </node>
</graph>
