# Supplementary material for: A systems-based framework to computationally describe putative transcription factors and signaling pathways regulating glycan biosynthesis
Source: publisher site journal article supplement (doi:10.3762/bjoc.17.119), 2021-07-22
Supplement: Additional file 2 [file 1860-5397-17-119-S2.cys › CytoscapeSession-2021_03_21-12_01/views/106825-134412-Basal+Breast.xgmml]

<?xml version="1.0" encoding="UTF-8" standalone="yes"?>
<graph id="134412" label="Basal Breast" cy:view="1" cy:networkId="106825" cy:visualStyle="default" cy:rendererId="org.cytoscape.ding" cy:documentVersion="3.0" xmlns:dc="http://purl.org/dc/elements/1.1/" xmlns:xlink="http://www.w3.org/1999/xlink" xmlns:rdf="http://www.w3.org/1999/02/22-rdf-syntax-ns#" xmlns:cy="http://www.cytoscape.org" xmlns="http://www.cs.rpi.edu/XGMML">
  <graphics>
    <att name="NETWORK_NODE_SELECTION" value="true" type="string" cy:type="String"/>
    <att name="NETWORK_CENTER_X_LOCATION" value="248.22528076171875" type="string" cy:type="String"/>
    <att name="NETWORK_HEIGHT" value="510.0" type="string" cy:type="String"/>
    <att name="NETWORK_TITLE" value="Basal Breast" type="string" cy:type="String"/>
    <att name="NETWORK_EDGE_SELECTION" value="true" type="string" cy:type="String"/>
    <att name="NETWORK_CENTER_Y_LOCATION" value="32.84765625" type="string" cy:type="String"/>
    <att name="NETWORK_WIDTH" value="1312.0" type="string" cy:type="String"/>
    <att name="NETWORK_DEPTH" value="0.0" type="string" cy:type="String"/>
    <att name="NETWORK_SCALE_FACTOR" value="0.10235940849387057" type="string" cy:type="String"/>
    <att name="NETWORK_ANNOTATION_SELECTION" value="false" type="string" cy:type="String"/>
    <att name="NETWORK_CENTER_Z_LOCATION" value="0.0" type="string" cy:type="String"/>
  </graphics>
  <node id="134461" label="RBL2" cy:nodeId="105968">
    <graphics y="-1264.6021332874834" z="0.0" x="1202.155351221681"/>
  </node>
  <node id="134462" label="RBBP5" cy:nodeId="105967">
    <graphics y="-1489.275106920296" z="0.0" x="745.6534591318373"/>
  </node>
  <node id="134457" label="REST" cy:nodeId="105970">
    <graphics y="-639.1489472523272" z="0.0" x="791.1098189951185"/>
  </node>
  <node id="134458" label="RCOR1" cy:nodeId="105969">
    <graphics y="-1399.0491547718584" z="0.0" x="918.6566329599623"/>
  </node>
  <node id="134456" label="RFX7" cy:nodeId="105974">
    <graphics y="-1978.754110826546" z="0.0" x="651.4940353037123"/>
  </node>
  <node id="134454" label="RNF2" cy:nodeId="105975">
    <graphics y="2235.596309171623" z="0.0" x="-549.6728653310533"/>
  </node>
  <node id="134452" label="RUNX3" cy:nodeId="105982">
    <graphics y="499.76291798204784" z="0.0" x="-841.5112747548815"/>
  </node>
  <node id="134453" label="RUNX2" cy:nodeId="105981">
    <graphics y="-121.02715159803029" z="0.0" x="-40.93772739160022"/>
  </node>
  <node id="134451" label="SIN3A" cy:nodeId="105984">
    <graphics y="-1783.244101060921" z="0.0" x="492.6447921396498"/>
  </node>
  <node id="134447" label="SIX5" cy:nodeId="105986">
    <graphics y="1386.6058745250166" z="0.0" x="-844.257734715819"/>
  </node>
  <node id="134652" label="UGCG" cy:nodeId="105985">
    <graphics y="-1044.235311998421" z="0.0" x="475.22056728613416"/>
  </node>
  <node id="134443" label="SMC3" cy:nodeId="105990">
    <graphics y="-1868.161825670296" z="0.0" x="727.1611495615248"/>
  </node>
  <node id="134444" label="SMC1A" cy:nodeId="105989">
    <graphics y="-1805.0711274281084" z="0.0" x="826.8815475107435"/>
  </node>
  <node id="134442" label="SOX10" cy:nodeId="105991">
    <graphics y="2138.4534849986494" z="0.0" x="-1086.6192764638658"/>
  </node>
  <node id="134435" label="SRCAP" cy:nodeId="105994">
    <graphics y="2031.8924956187666" z="0.0" x="-817.790693700194"/>
  </node>
  <node id="134438" label="SPDEF" cy:nodeId="105993">
    <graphics y="179.56565235704784" z="0.0" x="468.09712368261853"/>
  </node>
  <node id="134595" label="GANAB" cy:nodeId="105998">
    <graphics y="-2247.672079576546" z="0.0" x="882.916581690431"/>
  </node>
  <node id="134433" label="HPSE" cy:nodeId="106000">
    <graphics y="-484.7102112904131" z="0.0" x="-1196.779463231444"/>
  </node>
  <node id="134434" label="STAT1" cy:nodeId="105999">
    <graphics y="-449.1124863758623" z="0.0" x="-1053.796308934569"/>
  </node>
  <node id="134431" label="STAT4" cy:nodeId="106002">
    <graphics y="220.07749317736034" z="0.0" x="-659.0981888173815"/>
  </node>
  <node id="134432" label="STAT2" cy:nodeId="106001">
    <graphics y="-476.74609233289357" z="0.0" x="-912.1386551259752"/>
  </node>
  <node id="134430" label="TAF1" cy:nodeId="106006">
    <graphics y="-1386.5493989124834" z="0.0" x="756.321366846681"/>
  </node>
  <node id="134510" label="COG1" cy:nodeId="106005">
    <graphics y="1854.1749663218916" z="0.0" x="-966.350508153319"/>
  </node>
  <node id="134427" label="TCF12" cy:nodeId="106007">
    <graphics y="-1193.1192231312334" z="0.0" x="866.1757369638685"/>
  </node>
  <node id="134426" label="TDRD3" cy:nodeId="106011">
    <graphics y="-1350.2260956898272" z="0.0" x="1693.2299361826185"/>
  </node>
  <node id="134445" label="GALNT1" cy:nodeId="106014">
    <graphics y="-2202.6087250843584" z="0.0" x="424.5750899912123"/>
  </node>
  <node id="134425" label="TEAD1" cy:nodeId="106013">
    <graphics y="-1955.1267914906084" z="0.0" x="472.42125087988416"/>
  </node>
  <node id="134424" label="TET2" cy:nodeId="106016">
    <graphics y="-1145.5694184437334" z="0.0" x="655.6537032724623"/>
  </node>
  <node id="134420" label="USF1" cy:nodeId="106021">
    <graphics y="1125.241250501579" z="0.0" x="-985.348799168944"/>
  </node>
  <node id="134418" label="VEZF1" cy:nodeId="106023">
    <graphics y="-1603.1324067249834" z="0.0" x="938.1327071787123"/>
  </node>
  <node id="134417" label="YAP1" cy:nodeId="106026">
    <graphics y="2447.447591291374" z="0.0" x="-1196.779463231444"/>
  </node>
  <node id="134500" label="B3GALT4" cy:nodeId="106030">
    <graphics y="709.3802885875166" z="0.0" x="-423.2258133291002"/>
  </node>
  <node id="134414" label="ZBTB17" cy:nodeId="106029">
    <graphics y="1286.1786284312666" z="0.0" x="-616.2056717275377"/>
  </node>
  <node id="134662" label="ADNP" cy:nodeId="105684">
    <graphics y="507.4817290172041" z="0.0" x="-664.301435887694"/>
  </node>
  <node id="134660" label="AFF4" cy:nodeId="105686">
    <graphics y="-1178.3042817249834" z="0.0" x="758.2157760263685"/>
  </node>
  <node id="134661" label="FUT7" cy:nodeId="105685">
    <graphics y="399.79599903673534" z="0.0" x="-674.4098953603502"/>
  </node>
  <node id="134658" label="STT3B" cy:nodeId="105688">
    <graphics y="-1164.9424653187334" z="0.0" x="939.6486373544935"/>
  </node>
  <node id="134659" label="MAN1A2" cy:nodeId="105687">
    <graphics y="-1254.003622545296" z="0.0" x="747.819413721681"/>
  </node>
  <node id="134656" label="FUT11" cy:nodeId="105690">
    <graphics y="-887.6732697620928" z="0.0" x="849.0962081552748"/>
  </node>
  <node id="134657" label="NEU3" cy:nodeId="105689">
    <graphics y="-1628.0982270374834" z="0.0" x="689.9936690927748"/>
  </node>
  <node id="134653" label="COG5" cy:nodeId="105692">
    <graphics y="-1121.7527680531084" z="0.0" x="836.9494186044935"/>
  </node>
  <node id="134654" label="ACER2" cy:nodeId="105691">
    <graphics y="-1216.523397935921" z="0.0" x="684.8106856943373"/>
  </node>
  <node id="134655" label="MAN2A1" cy:nodeId="105694">
    <graphics y="-1241.3432831898272" z="0.0" x="967.967607081056"/>
  </node>
  <node id="134646" label="SLC35F5" cy:nodeId="105696">
    <graphics y="-1045.305624498421" z="0.0" x="1033.0429244638685"/>
  </node>
  <node id="134649" label="SLC35A3" cy:nodeId="105695">
    <graphics y="-1205.104208482796" z="0.0" x="567.0077987314467"/>
  </node>
  <node id="134651" label="GALNT10" cy:nodeId="105697">
    <graphics y="-458.17308665662404" z="0.0" x="181.12478786718884"/>
  </node>
  <node id="134525" label="RTF1" cy:nodeId="105700">
    <graphics y="-1083.4411835804522" z="0.0" x="1592.787675440431"/>
  </node>
  <node id="134647" label="SLC35A5" cy:nodeId="105702">
    <graphics y="-1355.3014130726397" z="0.0" x="848.4738326669935"/>
  </node>
  <node id="134639" label="ATF1" cy:nodeId="105701">
    <graphics y="-1241.652060045296" z="0.0" x="304.28978115332166"/>
  </node>
  <node id="134638" label="ATF2" cy:nodeId="105704">
    <graphics y="-1260.3727021351397" z="0.0" x="829.7416549326185"/>
  </node>
  <node id="134455" label="GALNT4" cy:nodeId="105703">
    <graphics y="-2145.5530610218584" z="0.0" x="645.039628565431"/>
  </node>
  <node id="134650" label="UGGT1" cy:nodeId="105705">
    <graphics y="-1446.0909028187334" z="0.0" x="807.4685226083998"/>
  </node>
  <node id="134584" label="B3GNT5" cy:nodeId="105707">
    <graphics y="2138.4534849986494" z="0.0" x="-607.6305069326158"/>
  </node>
  <node id="134636" label="ATF7IP" cy:nodeId="105710">
    <graphics y="-1859.059286607796" z="0.0" x="1390.7406783701185"/>
  </node>
  <node id="134642" label="HAS2" cy:nodeId="105709">
    <graphics y="-750.5670991077959" z="0.0" x="298.1835647226576"/>
  </node>
  <node id="134634" label="ATRX" cy:nodeId="105712">
    <graphics y="-1456.6626801624834" z="0.0" x="1403.2956100107435"/>
  </node>
  <node id="134635" label="ALG10" cy:nodeId="105711">
    <graphics y="-1765.1353364124834" z="0.0" x="1242.5597701669935"/>
  </node>
  <node id="134633" label="BACH1" cy:nodeId="105714">
    <graphics y="-991.2680268421709" z="0.0" x="663.8711104990248"/>
  </node>
  <node id="134637" label="FKTN" cy:nodeId="105713">
    <graphics y="-1483.2596039906084" z="0.0" x="878.8702560068373"/>
  </node>
  <node id="134582" label="MAN1A1" cy:nodeId="105716">
    <graphics y="-771.7640595570147" z="0.0" x="-61.51286166894397"/>
  </node>
  <node id="134632" label="CSGALNACT2" cy:nodeId="105715">
    <graphics y="-956.1594452992022" z="0.0" x="588.8455062509779"/>
  </node>
  <node id="134466" label="CHST11" cy:nodeId="105718">
    <graphics y="-937.9720673695147" z="0.0" x="-968.224775731444"/>
  </node>
  <node id="134494" label="CHSY1" cy:nodeId="105717">
    <graphics y="-1005.9926972523272" z="0.0" x="-521.6651443837877"/>
  </node>
  <node id="134448" label="DPM3" cy:nodeId="105722">
    <graphics y="1292.902871595329" z="0.0" x="-879.2006668447252"/>
  </node>
  <node id="134630" label="BATF" cy:nodeId="105721">
    <graphics y="839.4969878062666" z="0.0" x="-682.2017044423815"/>
  </node>
  <node id="134624" label="MGAT1" cy:nodeId="105724">
    <graphics y="647.8473296031416" z="0.0" x="-614.2844681142565"/>
  </node>
  <node id="134625" label="BATF3" cy:nodeId="105723">
    <graphics y="450.5864653453291" z="0.0" x="-493.6298660634752"/>
  </node>
  <node id="134615" label="ALG10B" cy:nodeId="105727">
    <graphics y="-1494.5291352406084" z="0.0" x="1105.2995162607435"/>
  </node>
  <node id="134572" label="FAM20B" cy:nodeId="105731">
    <graphics y="-1823.280478014046" z="0.0" x="1006.5883346201185"/>
  </node>
  <node id="134618" label="C17orf49" cy:nodeId="105736">
    <graphics y="1759.7179350718916" z="0.0" x="-605.1270584462877"/>
  </node>
  <node id="134616" label="CASP8AP2" cy:nodeId="105738">
    <graphics y="-1602.212118639046" z="0.0" x="1125.3053756357435"/>
  </node>
  <node id="134609" label="RFNG" cy:nodeId="105744">
    <graphics y="1677.9803862437666" z="0.0" x="-677.3338455556627"/>
  </node>
  <node id="134602" label="ST6GALNAC6" cy:nodeId="105746">
    <graphics y="1007.9260649547041" z="0.0" x="-348.83656162011584"/>
  </node>
  <node id="134598" label="MAN2A2" cy:nodeId="105748">
    <graphics y="-1519.822958482796" z="0.0" x="208.17049556982556"/>
  </node>
  <node id="134482" label="ST3GAL3" cy:nodeId="105747">
    <graphics y="2193.0499052867353" z="0.0" x="-449.67286533105334"/>
  </node>
  <node id="134501" label="IDUA" cy:nodeId="105749">
    <graphics y="1064.384072767204" z="0.0" x="-528.3594803212877"/>
  </node>
  <node id="134610" label="CBX8" cy:nodeId="105752">
    <graphics y="1589.152383314079" z="0.0" x="-753.0986770986315"/>
  </node>
  <node id="134617" label="B3GAT3" cy:nodeId="105754">
    <graphics y="1510.2862944468916" z="0.0" x="-586.052900731444"/>
  </node>
  <node id="134608" label="GALK1" cy:nodeId="105753">
    <graphics y="1470.6898589000166" z="0.0" x="-857.7980789541002"/>
  </node>
  <node id="134605" label="CDK8" cy:nodeId="105756">
    <graphics y="-1062.564901842171" z="0.0" x="938.1837325693373"/>
  </node>
  <node id="134607" label="CCDC101" cy:nodeId="105755">
    <graphics y="1506.719277845329" z="0.0" x="-465.28373569238147"/>
  </node>
  <node id="134603" label="DPM2" cy:nodeId="105758">
    <graphics y="1324.282510267204" z="0.0" x="-394.18787997949084"/>
  </node>
  <node id="134604" label="CDK9" cy:nodeId="105757">
    <graphics y="1246.820596204704" z="0.0" x="-272.36125034081897"/>
  </node>
  <node id="134449" label="PIGQ" cy:nodeId="105759">
    <graphics y="1451.2193999156416" z="0.0" x="-745.6159500478502"/>
  </node>
  <node id="134481" label="MOGS" cy:nodeId="105762">
    <graphics y="2031.8924956187666" z="0.0" x="-307.5200027822252"/>
  </node>
  <node id="134628" label="CHST12" cy:nodeId="105763">
    <graphics y="962.3358549937666" z="0.0" x="-786.4734329580065"/>
  </node>
  <node id="134567" label="MFNG" cy:nodeId="105766">
    <graphics y="-22.05843211560841" z="0.0" x="-464.0032791494127"/>
  </node>
  <node id="134629" label="NAGK" cy:nodeId="105765">
    <graphics y="1112.1590971812666" z="0.0" x="-628.1995682119127"/>
  </node>
  <node id="134599" label="CHD2" cy:nodeId="105770">
    <graphics y="-1429.7061371937334" z="0.0" x="373.84614712011853"/>
  </node>
  <node id="134600" label="CHD1" cy:nodeId="105769">
    <graphics y="-1319.0440888538897" z="0.0" x="775.4122481943373"/>
  </node>
  <node id="134429" label="OGT" cy:nodeId="105771">
    <graphics y="-1532.2014985218584" z="0.0" x="586.0274825693373"/>
  </node>
  <node id="134594" label="CHD8" cy:nodeId="105774">
    <graphics y="-1310.6506562367022" z="0.0" x="680.5814986826185"/>
  </node>
  <node id="134596" label="CHD4" cy:nodeId="105773">
    <graphics y="-2021.8206391468584" z="0.0" x="820.173173487306"/>
  </node>
  <node id="134528" label="LAMP3" cy:nodeId="105776">
    <graphics y="-394.1405377522051" z="0.0" x="-810.7698196767565"/>
  </node>
  <node id="134593" label="CIITA" cy:nodeId="105775">
    <graphics y="360.47409962267284" z="0.0" x="-852.8936600087877"/>
  </node>
  <node id="134502" label="MAN2B1" cy:nodeId="105777">
    <graphics y="832.1027006968916" z="0.0" x="-397.31654208886584"/>
  </node>
  <node id="134591" label="CPSF3L" cy:nodeId="105780">
    <graphics y="1587.589883314079" z="0.0" x="-155.49168246972522"/>
  </node>
  <node id="134514" label="DSE" cy:nodeId="105779">
    <graphics y="-176.15720225720997" z="0.0" x="-239.57176059472522"/>
  </node>
  <node id="134519" label="B4GALT7" cy:nodeId="105782">
    <graphics y="1331.8133940562666" z="0.0" x="-740.497969090819"/>
  </node>
  <node id="134590" label="B3GALT6" cy:nodeId="105781">
    <graphics y="1509.9833159312666" z="0.0" x="-328.82023471581897"/>
  </node>
  <node id="134578" label="B4GALNT4" cy:nodeId="105784">
    <graphics y="1734.6061186656416" z="0.0" x="-497.03300327050647"/>
  </node>
  <node id="134589" label="CREB3" cy:nodeId="105786">
    <graphics y="2041.1900725230635" z="0.0" x="179.82386928808728"/>
  </node>
  <node id="134419" label="B4GALT3" cy:nodeId="105789">
    <graphics y="1084.4088530406416" z="0.0" x="-1152.1838821767565"/>
  </node>
  <node id="134544" label="COG7" cy:nodeId="105791">
    <graphics y="2134.614755140251" z="0.0" x="-853.8791946767565"/>
  </node>
  <node id="134587" label="CTNNB1" cy:nodeId="105794">
    <graphics y="-1075.3543305531084" z="0.0" x="1159.919023096681"/>
  </node>
  <node id="134585" label="DEK" cy:nodeId="105795">
    <graphics y="2164.1544432506025" z="0.0" x="-717.790693700194"/>
  </node>
  <node id="134486" label="FUT1" cy:nodeId="105802">
    <graphics y="2456.745168195671" z="0.0" x="-498.5121597646471"/>
  </node>
  <node id="134583" label="EBF1" cy:nodeId="105804">
    <graphics y="-894.3709015980303" z="0.0" x="-57.85478061425647"/>
  </node>
  <node id="134612" label="ST3GAL2" cy:nodeId="105806">
    <graphics y="473.1289458140791" z="0.0" x="-267.41398471581897"/>
  </node>
  <node id="134570" label="CSGALNACT1" cy:nodeId="105805">
    <graphics y="2456.745168195671" z="0.0" x="-897.6458114980455"/>
  </node>
  <node id="134440" label="CHST3" cy:nodeId="105807">
    <graphics y="2031.8924956187666" z="0.0" x="-1041.3362259267565"/>
  </node>
  <node id="134643" label="AHR" cy:nodeId="106836">
    <graphics y="-868.5365204945147" z="0.0" x="358.1917739511732"/>
  </node>
  <node id="134439" label="ST3GAL6" cy:nodeId="105811">
    <graphics y="2235.596309171623" z="0.0" x="-1028.6616348623033"/>
  </node>
  <node id="134644" label="PIGK" cy:nodeId="106835">
    <graphics y="-1387.4403290882647" z="0.0" x="1206.9440475107435"/>
  </node>
  <node id="134631" label="B3GNT2" cy:nodeId="106838">
    <graphics y="-788.7845063343584" z="0.0" x="561.6555038095717"/>
  </node>
  <node id="134581" label="EGLN2" cy:nodeId="105813">
    <graphics y="1289.9823393687666" z="0.0" x="-1193.8586868642565"/>
  </node>
  <node id="134641" label="ASCL2" cy:nodeId="106837">
    <graphics y="41.32868336290721" z="0.0" x="-898.8445267080065"/>
  </node>
  <node id="134623" label="TPST2" cy:nodeId="106840">
    <graphics y="189.2589506968916" z="0.0" x="-372.4536880849596"/>
  </node>
  <node id="134627" label="ST6GALNAC4" cy:nodeId="106839">
    <graphics y="808.4745268687666" z="0.0" x="-761.5713943837877"/>
  </node>
  <node id="134621" label="UGT8" cy:nodeId="106842">
    <graphics y="2041.1900725230635" z="0.0" x="379.3906951547865"/>
  </node>
  <node id="134622" label="BCL11A" cy:nodeId="106841">
    <graphics y="2031.8924956187666" z="0.0" x="279.8238692880873"/>
  </node>
  <node id="134619" label="SLC35E1" cy:nodeId="106844">
    <graphics y="2041.1900725230635" z="0.0" x="578.9575210214857"/>
  </node>
  <node id="134620" label="BRD4" cy:nodeId="106843">
    <graphics y="2031.8924956187666" z="0.0" x="479.3906951547865"/>
  </node>
  <node id="134577" label="ELF1" cy:nodeId="105822">
    <graphics y="-1009.8930878773272" z="0.0" x="245.46571499121228"/>
  </node>
  <node id="134613" label="LFNG" cy:nodeId="106846">
    <graphics y="235.2860503062666" z="0.0" x="-165.42274326074084"/>
  </node>
  <node id="134579" label="EHMT2" cy:nodeId="105821">
    <graphics y="1931.8924956187666" z="0.0" x="-462.49626010644397"/>
  </node>
  <node id="134614" label="CBFA2T3" cy:nodeId="106845">
    <graphics y="316.9787993297041" z="0.0" x="-245.56800693261584"/>
  </node>
  <node id="134460" label="COG6" cy:nodeId="105824">
    <graphics y="-1317.5557465687334" z="0.0" x="1526.9015670419935"/>
  </node>
  <node id="134606" label="CDK12" cy:nodeId="106848">
    <graphics y="-1394.391073717171" z="0.0" x="499.80113369238416"/>
  </node>
  <node id="134576" label="COG3" cy:nodeId="105823">
    <graphics y="-1054.389120592171" z="0.0" x="105.74362608802357"/>
  </node>
  <node id="134611" label="CBX6" cy:nodeId="106847">
    <graphics y="603.2822050914228" z="0.0" x="-223.96363681542834"/>
  </node>
  <node id="134574" label="ELK3" cy:nodeId="105826">
    <graphics y="-621.7003541126787" z="0.0" x="915.3609786630873"/>
  </node>
  <node id="134586" label="DCP1A" cy:nodeId="106850">
    <graphics y="-1172.0796723499834" z="0.0" x="1121.898027002931"/>
  </node>
  <node id="134575" label="ELF2" cy:nodeId="105825">
    <graphics y="-1515.304403795296" z="0.0" x="999.892167627931"/>
  </node>
  <node id="134592" label="CLOCK" cy:nodeId="106849">
    <graphics y="-751.6018891468584" z="0.0" x="792.6162276865248"/>
  </node>
  <node id="134571" label="ELL2" cy:nodeId="106852">
    <graphics y="2447.447591291374" z="0.0" x="-997.2126373647448"/>
  </node>
  <node id="134573" label="ELK4" cy:nodeId="105827">
    <graphics y="-1724.5196137562334" z="0.0" x="1062.1493087412123"/>
  </node>
  <node id="134580" label="GALT" cy:nodeId="106851">
    <graphics y="1234.843789564079" z="0.0" x="-1033.3667435048815"/>
  </node>
  <node id="134563" label="XYLT1" cy:nodeId="106854">
    <graphics y="-701.275625719124" z="0.0" x="-293.12077182519397"/>
  </node>
  <node id="134569" label="ERCC6" cy:nodeId="105830">
    <graphics y="-1061.0735077992022" z="0.0" x="580.7301192880873"/>
  </node>
  <node id="134565" label="MAN1C1" cy:nodeId="106853">
    <graphics y="-265.94252635388966" z="0.0" x="-325.1024917958971"/>
  </node>
  <node id="134558" label="FUCA1" cy:nodeId="106856">
    <graphics y="-162.8141389027178" z="0.0" x="-526.024092137694"/>
  </node>
  <node id="134568" label="ERG" cy:nodeId="105832">
    <graphics y="-470.05789424329396" z="0.0" x="-292.6963943837877"/>
  </node>
  <node id="134559" label="ST6GAL1" cy:nodeId="106855">
    <graphics y="-143.14089061170216" z="0.0" x="-441.87919467675647"/>
  </node>
  <node id="134556" label="GCNT4" cy:nodeId="106858">
    <graphics y="22.91642140001659" z="0.0" x="-243.8980240224596"/>
  </node>
  <node id="134561" label="ST8SIA4" cy:nodeId="105834">
    <graphics y="-45.31474925428029" z="0.0" x="-547.990889012694"/>
  </node>
  <node id="134557" label="ST3GAL5" cy:nodeId="106857">
    <graphics y="-272.05222178846" z="0.0" x="-516.6518997548815"/>
  </node>
  <node id="134566" label="CHSY3" cy:nodeId="105833">
    <graphics y="-556.4063630238115" z="0.0" x="-388.98710483300647"/>
  </node>
  <node id="134553" label="MGAT4A" cy:nodeId="106860">
    <graphics y="-51.51122142224904" z="0.0" x="303.65445095312634"/>
  </node>
  <node id="134554" label="GALNT7" cy:nodeId="106859">
    <graphics y="98.94886158556346" z="0.0" x="352.38211208593884"/>
  </node>
  <node id="134564" label="CHST7" cy:nodeId="105835">
    <graphics y="-523.1360383167803" z="0.0" x="-201.34568637597522"/>
  </node>
  <node id="134436" label="CHST2" cy:nodeId="105838">
    <graphics y="462.3562407359541" z="0.0" x="-1160.1641067861315"/>
  </node>
  <node id="134549" label="FUS" cy:nodeId="106862">
    <graphics y="1636.4979643687666" z="0.0" x="-503.35319370019397"/>
  </node>
  <node id="134551" label="CHST15" cy:nodeId="106861">
    <graphics y="-16.18343211560841" z="0.0" x="11.5042205454115"/>
  </node>
  <node id="134546" label="GPI" cy:nodeId="106864">
    <graphics y="2456.745168195671" z="0.0" x="-698.0789856313463"/>
  </node>
  <node id="134547" label="GAPDH" cy:nodeId="106863">
    <graphics y="2447.447591291374" z="0.0" x="-797.6458114980455"/>
  </node>
  <node id="134562" label="ETS1" cy:nodeId="105839">
    <graphics y="-106.48860789685841" z="0.0" x="-628.2134231923815"/>
  </node>
  <node id="134541" label="GRHL1" cy:nodeId="106866">
    <graphics y="2031.8924956187666" z="0.0" x="-562.3474563955065"/>
  </node>
  <node id="134524" label="HS3ST3B1" cy:nodeId="105841">
    <graphics y="-962.8470673695147" z="0.0" x="1546.1642623544935"/>
  </node>
  <node id="134542" label="GPS2" cy:nodeId="106865">
    <graphics y="1140.4235014781416" z="0.0" x="-782.782392918944"/>
  </node>
  <node id="134508" label="EXTL2" cy:nodeId="105844">
    <graphics y="-2094.951864732796" z="0.0" x="292.52115017187634"/>
  </node>
  <node id="134534" label="MGAT2" cy:nodeId="106868">
    <graphics y="-813.9901337757647" z="0.0" x="1291.126542627931"/>
  </node>
  <node id="134535" label="HIF1A" cy:nodeId="106867">
    <graphics y="-900.7898163929522" z="0.0" x="1096.3512740732435"/>
  </node>
  <node id="134532" label="HOXB4" cy:nodeId="106870">
    <graphics y="378.03135059923534" z="0.0" x="-377.1409439443346"/>
  </node>
  <node id="134533" label="GALC" cy:nodeId="106869">
    <graphics y="-715.0838532581865" z="0.0" x="1219.039140284181"/>
  </node>
  <node id="134520" label="IRF3" cy:nodeId="106872">
    <graphics y="1229.7181792125166" z="0.0" x="-770.9089798330065"/>
  </node>
  <node id="134560" label="FLI1" cy:nodeId="105848">
    <graphics y="34.07727955431346" z="0.0" x="-420.38029330956897"/>
  </node>
  <node id="134521" label="IRF2" cy:nodeId="106871">
    <graphics y="-246.98728038220997" z="0.0" x="-752.0647415517565"/>
  </node>
  <node id="134506" label="KDM4A" cy:nodeId="106874">
    <graphics y="-2391.049765123421" z="0.0" x="921.8424239755873"/>
  </node>
  <node id="134555" label="FOXA1" cy:nodeId="105850">
    <graphics y="-39.20754100232716" z="0.0" x="177.00926357519666"/>
  </node>
  <node id="134509" label="KDM1B" cy:nodeId="106873">
    <graphics y="-2197.3135590687334" z="0.0" x="186.6636901499037"/>
  </node>
  <node id="134499" label="MAF" cy:nodeId="106876">
    <graphics y="124.44529102892284" z="0.0" x="-464.77335971581897"/>
  </node>
  <node id="134504" label="LEF1" cy:nodeId="106875">
    <graphics y="-43.71541453748341" z="0.0" x="-355.14091342675647"/>
  </node>
  <node id="134491" label="MEIS3" cy:nodeId="106878">
    <graphics y="604.0464873179853" z="0.0" x="-96.88914340722522"/>
  </node>
  <node id="134493" label="MEF2B" cy:nodeId="106877">
    <graphics y="880.5865874156416" z="0.0" x="-877.959883153319"/>
  </node>
  <node id="134471" label="POU2F2" cy:nodeId="106880">
    <graphics y="-857.7725739613115" z="0.0" x="-174.4640640615221"/>
  </node>
  <node id="134552" label="FOXO1" cy:nodeId="105856">
    <graphics y="39.10614918321971" z="0.0" x="-88.75694125878772"/>
  </node>
  <node id="134475" label="ALG6" cy:nodeId="106879">
    <graphics y="-2162.076620592171" z="0.0" x="1246.9438033701185"/>
  </node>
  <node id="134469" label="GFPT1" cy:nodeId="106882">
    <graphics y="2456.745168195671" z="0.0" x="-298.9453338979479"/>
  </node>
  <node id="134550" label="FOXP3" cy:nodeId="105858">
    <graphics y="130.55832813829784" z="0.0" x="-587.0112137197252"/>
  </node>
  <node id="134470" label="PPARA" cy:nodeId="106881">
    <graphics y="2447.447591291374" z="0.0" x="-398.5121597646471"/>
  </node>
  <node id="134463" label="RARA" cy:nodeId="106884">
    <graphics y="287.0923247203291" z="0.0" x="-15.659574925779907"/>
  </node>
  <node id="134527" label="NPL" cy:nodeId="105860">
    <graphics y="-619.4017853870928" z="0.0" x="-707.6034988759752"/>
  </node>
  <node id="134467" label="SULF1" cy:nodeId="106883">
    <graphics y="-834.8252167835772" z="0.0" x="-1062.742597997069"/>
  </node>
  <node id="134522" label="HK3" cy:nodeId="105859">
    <graphics y="206.2634672984541" z="0.0" x="-834.359785497069"/>
  </node>
  <node id="134446" label="SMAD2" cy:nodeId="106886">
    <graphics y="-2354.056112779671" z="0.0" x="393.4480147958998"/>
  </node>
  <node id="134450" label="SIRT6" cy:nodeId="106885">
    <graphics y="1408.766641126579" z="0.0" x="-619.4670242666002"/>
  </node>
  <node id="134548" label="GABPA" cy:nodeId="105861">
    <graphics y="-1501.066122545296" z="0.0" x="1265.8554244638685"/>
  </node>
  <node id="134437" label="SPIB" cy:nodeId="106888">
    <graphics y="444.9932036265791" z="0.0" x="-997.048017918944"/>
  </node>
  <node id="134441" label="EXTL1" cy:nodeId="106887">
    <graphics y="2164.1544432506025" z="0.0" x="-1196.779463231444"/>
  </node>
  <node id="134423" label="THAP11" cy:nodeId="106890">
    <graphics y="2083.6598296031416" z="0.0" x="-113.70700687158069"/>
  </node>
  <node id="134545" label="GLYR1" cy:nodeId="105866">
    <graphics y="2244.727273450798" z="0.0" x="-892.5678238271471"/>
  </node>
  <node id="134428" label="TBX21" cy:nodeId="106889">
    <graphics y="256.52829884142284" z="0.0" x="-490.6054520009752"/>
  </node>
  <node id="134421" label="COG4" cy:nodeId="106892">
    <graphics y="2031.8924956187666" z="0.0" x="-19.74295657861194"/>
  </node>
  <node id="134422" label="COG8" cy:nodeId="106891">
    <graphics y="2135.3440947398603" z="0.0" x="-207.52000278222522"/>
  </node>
  <node id="134543" label="ALG1" cy:nodeId="105867">
    <graphics y="2347.447591291374" z="0.0" x="-928.6616348623033"/>
  </node>
  <node id="134415" label="ZBTB10" cy:nodeId="106894">
    <graphics y="-961.4014496937334" z="0.0" x="1220.5006881357435"/>
  </node>
  <node id="134416" label="STT3A" cy:nodeId="106893">
    <graphics y="2456.745168195671" z="0.0" x="-1097.2126373647448"/>
  </node>
  <node id="134539" label="H2AFX" cy:nodeId="105872">
    <graphics y="1614.4352202281416" z="0.0" x="-618.3332962392565"/>
  </node>
  <node id="134540" label="GTF2I" cy:nodeId="105871">
    <graphics y="-1318.9707245960772" z="0.0" x="963.3448653818373"/>
  </node>
  <node id="134588" label="PIGO" cy:nodeId="105874">
    <graphics y="2031.8924956187666" z="0.0" x="80.25704342138806"/>
  </node>
  <node id="134538" label="HCFC1" cy:nodeId="105873">
    <graphics y="-1758.275595201546" z="0.0" x="705.2961593271498"/>
  </node>
  <node id="134536" label="HES4" cy:nodeId="105876">
    <graphics y="1610.5582671031416" z="0.0" x="-1000.195478856444"/>
  </node>
  <node id="134537" label="HECTD1" cy:nodeId="105875">
    <graphics y="-859.6030488148272" z="0.0" x="661.5736861826185"/>
  </node>
  <node id="134601" label="TSTA3" cy:nodeId="105880">
    <graphics y="1439.9723296031416" z="0.0" x="-221.18714755761584"/>
  </node>
  <node id="134531" label="HSF1" cy:nodeId="105879">
    <graphics y="1649.6886381968916" z="0.0" x="-341.4149002431627"/>
  </node>
  <node id="134529" label="IKZF1" cy:nodeId="105882">
    <graphics y="-358.5481324329912" z="0.0" x="-439.86857455956897"/>
  </node>
  <node id="134515" label="LIPA" cy:nodeId="105884">
    <graphics y="-61.88555003553029" z="0.0" x="-765.9765457509752"/>
  </node>
  <node id="134640" label="GM2A" cy:nodeId="105883">
    <graphics y="95.11094044298534" z="0.0" x="-714.8632645009752"/>
  </node>
  <node id="134526" label="INO80" cy:nodeId="105885">
    <graphics y="-1080.9709687367022" z="0.0" x="1408.672685206056"/>
  </node>
  <node id="134518" label="IRF4" cy:nodeId="105888">
    <graphics y="-387.58358622937794" z="0.0" x="-622.333418309569"/>
  </node>
  <node id="134523" label="IRF1" cy:nodeId="105887">
    <graphics y="191.6943755015791" z="0.0" x="-1017.560469090819"/>
  </node>
  <node id="134516" label="IRF8" cy:nodeId="105890">
    <graphics y="8.728219495719713" z="0.0" x="-584.4722732900377"/>
  </node>
  <node id="134517" label="IRF5" cy:nodeId="105889">
    <graphics y="429.9111723765791" z="0.0" x="-756.2500442861315"/>
  </node>
  <node id="134512" label="JMJD1C" cy:nodeId="105892">
    <graphics y="-1059.9985566273272" z="0.0" x="746.5529342294935"/>
  </node>
  <node id="134513" label="JDP2" cy:nodeId="105891">
    <graphics y="662.1875395640791" z="0.0" x="-758.816084325194"/>
  </node>
  <node id="134511" label="JMJD6" cy:nodeId="105894">
    <graphics y="1713.7457671031416" z="0.0" x="-866.7559646962877"/>
  </node>
  <node id="134597" label="MGAT5" cy:nodeId="105893">
    <graphics y="-1330.1045136585772" z="0.0" x="408.1008773447279"/>
  </node>
  <node id="134505" label="KDM5A" cy:nodeId="105904">
    <graphics y="-1672.954306139046" z="0.0" x="471.8957687021498"/>
  </node>
  <node id="134507" label="KDM3A" cy:nodeId="105903">
    <graphics y="-1142.758749498421" z="0.0" x="373.72822719824353"/>
  </node>
  <node id="134645" label="HS2ST1" cy:nodeId="105906">
    <graphics y="-1347.2390961781084" z="0.0" x="600.2480025888685"/>
  </node>
  <node id="134459" label="GNS" cy:nodeId="105905">
    <graphics y="-1259.7616181507647" z="0.0" x="1370.687577784181"/>
  </node>
  <node id="134626" label="RENBP" cy:nodeId="105912">
    <graphics y="844.8874907359541" z="0.0" x="-575.0920242666002"/>
  </node>
  <node id="134503" label="LYL1" cy:nodeId="105911">
    <graphics y="736.4737944468916" z="0.0" x="-536.024336278319"/>
  </node>
  <node id="134498" label="MAFB" cy:nodeId="105914">
    <graphics y="-326.2142090931475" z="0.0" x="-3.354063451170532"/>
  </node>
  <node id="134497" label="MAZ" cy:nodeId="105916">
    <graphics y="1740.8812651500166" z="0.0" x="-408.3832840322252"/>
  </node>
  <node id="134530" label="B4GALT2" cy:nodeId="105917">
    <graphics y="1783.0030913218916" z="0.0" x="-290.22404330956897"/>
  </node>
  <node id="134496" label="MED1" cy:nodeId="105924">
    <graphics y="-751.0005707874834" z="0.0" x="912.3095870615248"/>
  </node>
  <node id="134492" label="MEF2C" cy:nodeId="105926">
    <graphics y="-636.2614045277178" z="0.0" x="-47.23068088281116"/>
  </node>
  <node id="134495" label="MEF2A" cy:nodeId="105925">
    <graphics y="-895.1482758656084" z="0.0" x="-434.1130203603502"/>
  </node>
  <node id="134489" label="MSX1" cy:nodeId="105932">
    <graphics y="483.6625151500166" z="0.0" x="-113.3454880117174"/>
  </node>
  <node id="134490" label="MRE11A" cy:nodeId="105931">
    <graphics y="-1703.4029145374834" z="0.0" x="594.6075606943373"/>
  </node>
  <node id="134487" label="MYBL1" cy:nodeId="105934">
    <graphics y="2447.447591291374" z="0.0" x="-598.0789856313463"/>
  </node>
  <node id="134488" label="MXD3" cy:nodeId="105933">
    <graphics y="1298.559854017204" z="0.0" x="-527.5000442861315"/>
  </node>
  <node id="134485" label="MYH11" cy:nodeId="105937">
    <graphics y="-766.5983185902178" z="0.0" x="-397.9611343740221"/>
  </node>
  <node id="134484" label="NFAT5" cy:nodeId="105943">
    <graphics y="-963.2583222523272" z="0.0" x="927.1207442880873"/>
  </node>
  <node id="134483" label="NFYC" cy:nodeId="105946">
    <graphics y="2112.4701628550947" z="0.0" x="-378.59757846581897"/>
  </node>
  <node id="134479" label="NPAT" cy:nodeId="105948">
    <graphics y="-684.133780015999" z="0.0" x="1020.611650049806"/>
  </node>
  <node id="134480" label="NIPBL" cy:nodeId="105947">
    <graphics y="-1271.5334687367022" z="0.0" x="630.9394698740248"/>
  </node>
  <node id="134648" label="SLC35D1" cy:nodeId="105950">
    <graphics y="-1401.6101288929522" z="0.0" x="677.6778731943373"/>
  </node>
  <node id="134478" label="NR2C2" cy:nodeId="105949">
    <graphics y="-1389.7918305531084" z="0.0" x="1055.975907862306"/>
  </node>
  <node id="134477" label="PCGF1" cy:nodeId="105955">
    <graphics y="1871.9669585093916" z="0.0" x="-729.341719090819"/>
  </node>
  <node id="134474" label="PIAS1" cy:nodeId="105958">
    <graphics y="-1246.7881684437334" z="0.0" x="482.86995083105603"/>
  </node>
  <node id="134476" label="PHF6" cy:nodeId="105957">
    <graphics y="-2038.8428559437334" z="0.0" x="1153.023027002931"/>
  </node>
  <node id="134472" label="POLR3A" cy:nodeId="105960">
    <graphics y="-801.8666291370928" z="0.0" x="1005.0825362802748"/>
  </node>
  <node id="134473" label="POLR2B" cy:nodeId="105959">
    <graphics y="-1644.8892426624834" z="0.0" x="809.0429244638685"/>
  </node>
  <node id="134468" label="PRDM1" cy:nodeId="105962">
    <graphics y="-802.3421235218584" z="0.0" x="-918.0550369619127"/>
  </node>
  <node id="134464" label="RAC3" cy:nodeId="105964">
    <graphics y="1497.150674329704" z="0.0" x="-1034.459394872069"/>
  </node>
  <node id="134465" label="PRKDC" cy:nodeId="105963">
    <graphics y="-1816.5799164906084" z="0.0" x="599.4106002451185"/>
  </node>
</graph>
