# Supplementary material for: A systems-based framework to computationally describe putative transcription factors and signaling pathways regulating glycan biosynthesis
Source: publisher site journal article supplement (doi:10.3762/bjoc.17.119), 2021-07-22
Supplement: Additional file 2 [file 1860-5397-17-119-S2.cys › CytoscapeSession-2021_03_21-12_01/views/107263-159055-CESC.xgmml]

<?xml version="1.0" encoding="UTF-8" standalone="yes"?>
<graph id="159055" label="CESC" cy:view="1" cy:networkId="107263" cy:visualStyle="default" cy:rendererId="org.cytoscape.ding" cy:documentVersion="3.0" xmlns:dc="http://purl.org/dc/elements/1.1/" xmlns:xlink="http://www.w3.org/1999/xlink" xmlns:rdf="http://www.w3.org/1999/02/22-rdf-syntax-ns#" xmlns:cy="http://www.cytoscape.org" xmlns="http://www.cs.rpi.edu/XGMML">
  <graphics>
    <att name="NETWORK_NODE_SELECTION" value="true" type="string" cy:type="String"/>
    <att name="NETWORK_CENTER_X_LOCATION" value="133.9412841796875" type="string" cy:type="String"/>
    <att name="NETWORK_HEIGHT" value="510.0" type="string" cy:type="String"/>
    <att name="NETWORK_TITLE" value="CESC" type="string" cy:type="String"/>
    <att name="NETWORK_EDGE_SELECTION" value="true" type="string" cy:type="String"/>
    <att name="NETWORK_CENTER_Y_LOCATION" value="-72.96575927734375" type="string" cy:type="String"/>
    <att name="NETWORK_WIDTH" value="1312.0" type="string" cy:type="String"/>
    <att name="NETWORK_DEPTH" value="0.0" type="string" cy:type="String"/>
    <att name="NETWORK_SCALE_FACTOR" value="0.16888988877392686" type="string" cy:type="String"/>
    <att name="NETWORK_ANNOTATION_SELECTION" value="false" type="string" cy:type="String"/>
    <att name="NETWORK_CENTER_Z_LOCATION" value="0.0" type="string" cy:type="String"/>
  </graphics>
  <node id="159114" label="RBL2" cy:nodeId="105968">
    <graphics y="-79.62385925735748" z="0.0" x="-42.79351411121252"/>
  </node>
  <node id="159117" label="RBBP5" cy:nodeId="105967">
    <graphics y="-116.72601565803802" z="0.0" x="-99.95995698230627"/>
  </node>
  <node id="159113" label="RCOR1" cy:nodeId="105969">
    <graphics y="119.28793468986237" z="0.0" x="-85.61967072742345"/>
  </node>
  <node id="159111" label="RFX7" cy:nodeId="105974">
    <graphics y="394.27145519767487" z="0.0" x="5.303150317498421"/>
  </node>
  <node id="159104" label="COG2" cy:nodeId="105973">
    <graphics y="-982.6220994898251" z="0.0" x="-507.3998526121891"/>
  </node>
  <node id="159172" label="FPGT" cy:nodeId="105976">
    <graphics y="-238.40000781502044" z="0.0" x="49.92507567150233"/>
  </node>
  <node id="159109" label="RNF2" cy:nodeId="105975">
    <graphics y="-197.3517518946103" z="0.0" x="138.55200328571436"/>
  </node>
  <node id="159108" label="RUNX1" cy:nodeId="105978">
    <graphics y="1078.7720045140811" z="0.0" x="-799.9661444212711"/>
  </node>
  <node id="159103" label="SIN3A" cy:nodeId="105984">
    <graphics y="-314.37904223884857" z="0.0" x="-101.07978425281408"/>
  </node>
  <node id="159107" label="RXRA" cy:nodeId="105983">
    <graphics y="-220.18682727302826" z="0.0" x="-1209.8623770262516"/>
  </node>
  <node id="159333" label="UGCG" cy:nodeId="105985">
    <graphics y="229.18081799064362" z="0.0" x="-273.19901643054845"/>
  </node>
  <node id="159097" label="SMAD4" cy:nodeId="105987">
    <graphics y="-858.1513353296689" z="0.0" x="223.25373472911951"/>
  </node>
  <node id="159093" label="SMC3" cy:nodeId="105990">
    <graphics y="-56.78978785957611" z="0.0" x="16.43845762951014"/>
  </node>
  <node id="159094" label="SMC1A" cy:nodeId="105989">
    <graphics y="59.642228513104556" z="0.0" x="3.2336160157406084"/>
  </node>
  <node id="159090" label="SRCAP" cy:nodeId="105994">
    <graphics y="252.2767347386905" z="0.0" x="-574.7826040770328"/>
  </node>
  <node id="159324" label="GANAB" cy:nodeId="105998">
    <graphics y="-360.26028308357513" z="0.0" x="-554.5083731200016"/>
  </node>
  <node id="159089" label="SSRP1" cy:nodeId="105997">
    <graphics y="-454.1304918238095" z="0.0" x="-754.8511465575016"/>
  </node>
  <node id="159088" label="STAT1" cy:nodeId="105999">
    <graphics y="-970.5864549585751" z="0.0" x="1346.835010669061"/>
  </node>
  <node id="159084" label="STAT4" cy:nodeId="106002">
    <graphics y="-1016.1558519312314" z="0.0" x="1676.262989184686"/>
  </node>
  <node id="159087" label="STAT2" cy:nodeId="106001">
    <graphics y="-1090.1656785913876" z="0.0" x="2383.880176684686"/>
  </node>
  <node id="159083" label="STAT5A" cy:nodeId="106003">
    <graphics y="-1169.2153001734189" z="0.0" x="2003.4811288331234"/>
  </node>
  <node id="159080" label="TAF1" cy:nodeId="106006">
    <graphics y="-10.865973086016538" z="0.0" x="61.87069334728358"/>
  </node>
  <node id="159076" label="TCF7L1" cy:nodeId="106009">
    <graphics y="1078.7720045140811" z="0.0" x="-500.3993185545719"/>
  </node>
  <node id="159073" label="ALG5" cy:nodeId="106012">
    <graphics y="1389.1964735082217" z="0.0" x="-1816.8638571287906"/>
  </node>
  <node id="159074" label="TDRD3" cy:nodeId="106011">
    <graphics y="1379.8988966039249" z="0.0" x="-1916.4306829954899"/>
  </node>
  <node id="159070" label="TET2" cy:nodeId="106016">
    <graphics y="59.541032224042056" z="0.0" x="92.96930327159998"/>
  </node>
  <node id="159066" label="TP63" cy:nodeId="106017">
    <graphics y="565.1598829320499" z="0.0" x="1096.0203744385922"/>
  </node>
  <node id="159064" label="UBTF" cy:nodeId="106020">
    <graphics y="308.09201183829987" z="0.0" x="698.5245858643734"/>
  </node>
  <node id="159065" label="TTF2" cy:nodeId="106019">
    <graphics y="-135.34630832161224" z="0.0" x="-44.63013825672033"/>
  </node>
  <node id="159063" label="USF1" cy:nodeId="106021">
    <graphics y="-1140.5470872827939" z="0.0" x="1838.5494882081234"/>
  </node>
  <node id="159061" label="WDR5" cy:nodeId="106024">
    <graphics y="1078.7720045140811" z="0.0" x="-1087.7431906248844"/>
  </node>
  <node id="159060" label="XRN2" cy:nodeId="106025">
    <graphics y="33.36901226554596" z="0.0" x="-268.3408010985172"/>
  </node>
  <node id="159059" label="YY1" cy:nodeId="106028">
    <graphics y="272.0548414281436" z="0.0" x="-56.798686840704704"/>
  </node>
  <node id="159149" label="C1GALT1C1" cy:nodeId="106032">
    <graphics y="283.0367445043155" z="0.0" x="329.4410897706234"/>
  </node>
  <node id="159057" label="ZBTB33" cy:nodeId="106031">
    <graphics y="214.1998304418155" z="0.0" x="178.17063536388514"/>
  </node>
  <node id="159336" label="ADNP" cy:nodeId="105684">
    <graphics y="-1283.7455736109189" z="0.0" x="1846.091846606561"/>
  </node>
  <node id="159335" label="FUT7" cy:nodeId="105685">
    <graphics y="-1116.3390794702939" z="0.0" x="1699.2289315674984"/>
  </node>
  <node id="159326" label="STT3B" cy:nodeId="105688">
    <graphics y="-58.442387194292905" z="0.0" x="-157.1456106688297"/>
  </node>
  <node id="159319" label="MAN1A2" cy:nodeId="105687">
    <graphics y="-12.902212710039976" z="0.0" x="-17.614131786993767"/>
  </node>
  <node id="159318" label="FUT11" cy:nodeId="105690">
    <graphics y="159.739991574628" z="0.0" x="-300.64664826648595"/>
  </node>
  <node id="159316" label="NEU3" cy:nodeId="105689">
    <graphics y="48.26175060783112" z="0.0" x="-133.8207815672672"/>
  </node>
  <node id="159309" label="COG5" cy:nodeId="105692">
    <graphics y="133.31303539787018" z="0.0" x="126.16285433513758"/>
  </node>
  <node id="159317" label="ACER2" cy:nodeId="105691">
    <graphics y="-13.285437197344663" z="0.0" x="-141.8586233641422"/>
  </node>
  <node id="159272" label="MAN2A1" cy:nodeId="105694">
    <graphics y="14.463960080487368" z="0.0" x="-188.0877493407047"/>
  </node>
  <node id="159257" label="SLC35F5" cy:nodeId="105696">
    <graphics y="541.3428052953311" z="0.0" x="-133.11762604968908"/>
  </node>
  <node id="159302" label="SLC35A3" cy:nodeId="105695">
    <graphics y="116.015382199628" z="0.0" x="45.76691069347498"/>
  </node>
  <node id="159196" label="GALNT10" cy:nodeId="105697">
    <graphics y="-74.08565864052093" z="0.0" x="-909.8068350340641"/>
  </node>
  <node id="159331" label="RTF1" cy:nodeId="105700">
    <graphics y="-300.87452563728607" z="0.0" x="131.07873644573328"/>
  </node>
  <node id="159332" label="ARID2" cy:nodeId="105699">
    <graphics y="-230.55576953377044" z="0.0" x="329.86819853527186"/>
  </node>
  <node id="159287" label="SLC35A5" cy:nodeId="105702">
    <graphics y="-110.261135668414" z="0.0" x="31.09196867687342"/>
  </node>
  <node id="159327" label="ATF1" cy:nodeId="105701">
    <graphics y="-381.7676683374814" z="0.0" x="-424.95496735828283"/>
  </node>
  <node id="159231" label="GALNT4" cy:nodeId="105703">
    <graphics y="492.44564953361237" z="0.0" x="194.13563170177576"/>
  </node>
  <node id="159304" label="UGGT1" cy:nodeId="105705">
    <graphics y="655.4882520726749" z="0.0" x="-217.42350373523595"/>
  </node>
  <node id="159208" label="B3GNT5" cy:nodeId="105707">
    <graphics y="451.6802076390811" z="0.0" x="839.8657723878109"/>
  </node>
  <node id="159305" label="ALG10" cy:nodeId="105711">
    <graphics y="324.88876476798737" z="0.0" x="-92.5897024657047"/>
  </node>
  <node id="159320" label="BACH1" cy:nodeId="105714">
    <graphics y="106.44537487540924" z="0.0" x="-278.49174103992345"/>
  </node>
  <node id="159242" label="FKTN" cy:nodeId="105713">
    <graphics y="-246.41090259041107" z="0.0" x="-126.04182038562658"/>
  </node>
  <node id="159323" label="CSGALNACT2" cy:nodeId="105715">
    <graphics y="-471.9488511988095" z="0.0" x="-454.54932770984533"/>
  </node>
  <node id="159322" label="CHSY1" cy:nodeId="105717">
    <graphics y="-240.472410769122" z="0.0" x="-358.3449209715641"/>
  </node>
  <node id="159163" label="ST6GAL2" cy:nodeId="105720">
    <graphics y="1130.5393384984561" z="0.0" x="-893.9301947142399"/>
  </node>
  <node id="159315" label="BATF" cy:nodeId="105721">
    <graphics y="-1156.1734300562314" z="0.0" x="1543.727100512811"/>
  </node>
  <node id="159160" label="MGAT1" cy:nodeId="105724">
    <graphics y="-843.8343797632626" z="0.0" x="1874.678516528436"/>
  </node>
  <node id="159307" label="BRCA1" cy:nodeId="105728">
    <graphics y="222.38519421134674" z="0.0" x="-134.92231354968908"/>
  </node>
  <node id="159301" label="ALG10B" cy:nodeId="105727">
    <graphics y="-90.52263125862396" z="0.0" x="-293.83048615711095"/>
  </node>
  <node id="159308" label="PIGN" cy:nodeId="105730">
    <graphics y="-78.4629338690213" z="0.0" x="98.42539229137537"/>
  </node>
  <node id="159306" label="PIGW" cy:nodeId="105729">
    <graphics y="534.2873853734561" z="0.0" x="-317.5851858641422"/>
  </node>
  <node id="159325" label="SLC35E3" cy:nodeId="105732">
    <graphics y="-389.91274890388763" z="0.0" x="-158.53248200672033"/>
  </node>
  <node id="159283" label="FAM20B" cy:nodeId="105731">
    <graphics y="-156.08228930916107" z="0.0" x="283.45808806163905"/>
  </node>
  <node id="159299" label="ALG12" cy:nodeId="105734">
    <graphics y="-482.90923938240326" z="0.0" x="550.0814095948422"/>
  </node>
  <node id="159300" label="BRD1" cy:nodeId="105733">
    <graphics y="-298.66253528084076" z="0.0" x="274.6528512452328"/>
  </node>
  <node id="159259" label="PMM1" cy:nodeId="105735">
    <graphics y="1224.1474927953311" z="0.0" x="-1795.1338614012516"/>
  </node>
  <node id="159288" label="CASP8AP2" cy:nodeId="105738">
    <graphics y="-321.0361772486142" z="0.0" x="-293.98316560047033"/>
  </node>
  <node id="159321" label="B4GALT1" cy:nodeId="107274">
    <graphics y="-603.3729539820126" z="0.0" x="-572.6789663817203"/>
  </node>
  <node id="159329" label="ASH2L" cy:nodeId="107273">
    <graphics y="173.26272717033112" z="0.0" x="707.8268929932797"/>
  </node>
  <node id="159296" label="BRD2" cy:nodeId="107276">
    <graphics y="-154.35334643806732" z="0.0" x="-282.65003571765783"/>
  </node>
  <node id="159286" label="CBFB" cy:nodeId="105739">
    <graphics y="196.789796262128" z="0.0" x="398.9652596924984"/>
  </node>
  <node id="159310" label="BCL6" cy:nodeId="107275">
    <graphics y="67.59707775626862" z="0.0" x="340.0002175782406"/>
  </node>
  <node id="159203" label="CMAS" cy:nodeId="105742">
    <graphics y="-862.2367845484189" z="0.0" x="-90.85541901843908"/>
  </node>
  <node id="159294" label="FUT10" cy:nodeId="107278">
    <graphics y="268.0254224828311" z="0.0" x="-181.55036530750158"/>
  </node>
  <node id="159295" label="BRD3" cy:nodeId="107277">
    <graphics y="173.39503613029206" z="0.0" x="-184.37916169422033"/>
  </node>
  <node id="159274" label="HS3ST6" cy:nodeId="107280">
    <graphics y="1212.2179273656436" z="0.0" x="-1418.7690695311344"/>
  </node>
  <node id="159293" label="B4GALT5" cy:nodeId="107279">
    <graphics y="504.50192394767487" z="0.0" x="-212.91199860828283"/>
  </node>
  <node id="159262" label="DNMT3A" cy:nodeId="107282">
    <graphics y="-687.1752000757626" z="0.0" x="62.29668059093592"/>
  </node>
  <node id="159263" label="SLC35B3" cy:nodeId="107281">
    <graphics y="1379.8988966039249" z="0.0" x="-1517.2970312620914"/>
  </node>
  <node id="159285" label="CBX7" cy:nodeId="105745">
    <graphics y="-172.60379657234466" z="0.0" x="591.5177194092953"/>
  </node>
  <node id="159258" label="E2F3" cy:nodeId="107284">
    <graphics y="778.1779493382999" z="0.0" x="-190.7243460203922"/>
  </node>
  <node id="159298" label="MAN2A2" cy:nodeId="105748">
    <graphics y="-389.09109363045013" z="0.0" x="286.67357268077967"/>
  </node>
  <node id="159261" label="GAL3ST2" cy:nodeId="107283">
    <graphics y="-928.4960008570126" z="0.0" x="62.49087156993983"/>
  </node>
  <node id="159176" label="MGAT3" cy:nodeId="105750">
    <graphics y="-803.1286912867001" z="0.0" x="477.58726896984217"/>
  </node>
  <node id="159254" label="ALG8" cy:nodeId="107286">
    <graphics y="-272.5797868677548" z="0.0" x="1255.844043872186"/>
  </node>
  <node id="159255" label="EED" cy:nodeId="107285">
    <graphics y="-206.46064624275482" z="0.0" x="1094.7613412354672"/>
  </node>
  <node id="159249" label="FUT6" cy:nodeId="107288">
    <graphics y="590.6883863500186" z="0.0" x="155.68205275280116"/>
  </node>
  <node id="159250" label="FUT2" cy:nodeId="107287">
    <graphics y="611.2680982640811" z="0.0" x="457.05296721202967"/>
  </node>
  <node id="159247" label="ASAH1" cy:nodeId="107290">
    <graphics y="178.67318859611237" z="0.0" x="71.86016859752772"/>
  </node>
  <node id="159248" label="FUT3" cy:nodeId="107289">
    <graphics y="655.7489332250186" z="0.0" x="57.29314818126795"/>
  </node>
  <node id="159241" label="ERCC3" cy:nodeId="107292">
    <graphics y="-670.3464036890439" z="0.0" x="-310.29374299304845"/>
  </node>
  <node id="159278" label="CDK8" cy:nodeId="105756">
    <graphics y="105.88473644767487" z="0.0" x="-152.80421052234533"/>
  </node>
  <node id="159245" label="PAPSS1" cy:nodeId="107291">
    <graphics y="-377.5230394312314" z="0.0" x="113.97488798839686"/>
  </node>
  <node id="159153" label="DPM2" cy:nodeId="105758">
    <graphics y="1124.439210324628" z="0.0" x="-2015.203075268439"/>
  </node>
  <node id="159236" label="FOSL1" cy:nodeId="107294">
    <graphics y="848.6376661351749" z="0.0" x="1296.5895272706234"/>
  </node>
  <node id="159239" label="HK1" cy:nodeId="107293">
    <graphics y="767.1960157445499" z="0.0" x="-386.09608063953283"/>
  </node>
  <node id="159228" label="GCNT2" cy:nodeId="107296">
    <graphics y="755.2181715062686" z="0.0" x="399.0951119874203"/>
  </node>
  <node id="159234" label="FOSL2" cy:nodeId="107295">
    <graphics y="305.9302076390811" z="0.0" x="-251.33243928211095"/>
  </node>
  <node id="159226" label="FOXK1" cy:nodeId="107298">
    <graphics y="-250.502195925372" z="0.0" x="-870.3372305418766"/>
  </node>
  <node id="159128" label="POMT1" cy:nodeId="105761">
    <graphics y="1159.3496717504092" z="0.0" x="-1158.8207663084781"/>
  </node>
  <node id="159227" label="GNE" cy:nodeId="107297">
    <graphics y="650.5560621312686" z="0.0" x="354.264469287225"/>
  </node>
  <node id="159222" label="ALG11" cy:nodeId="107300">
    <graphics y="-700.1457811304501" z="0.0" x="-123.47611603992345"/>
  </node>
  <node id="159276" label="CEBPA" cy:nodeId="105764">
    <graphics y="1144.0259107640811" z="0.0" x="-1508.3123434569156"/>
  </node>
  <node id="159158" label="CHST12" cy:nodeId="105763">
    <graphics y="-756.8451219507626" z="0.0" x="1777.010791919061"/>
  </node>
  <node id="159224" label="EXTL3" cy:nodeId="107299">
    <graphics y="-346.63699206795013" z="0.0" x="-1069.1834219481266"/>
  </node>
  <node id="159206" label="GTF3C2" cy:nodeId="107302">
    <graphics y="-629.2986741968564" z="0.0" x="498.2852975342953"/>
  </node>
  <node id="159218" label="MFNG" cy:nodeId="105766">
    <graphics y="-873.1075731226376" z="0.0" x="1556.0463143799984"/>
  </node>
  <node id="159207" label="GRHL2" cy:nodeId="107301">
    <graphics y="-191.48389300789154" z="0.0" x="216.7883264039242"/>
  </node>
  <node id="159275" label="NAGK" cy:nodeId="105765">
    <graphics y="1078.7720045140811" z="0.0" x="-1593.9985006834781"/>
  </node>
  <node id="159202" label="HDAC3" cy:nodeId="107304">
    <graphics y="1379.8988966039249" z="0.0" x="-918.5965536619938"/>
  </node>
  <node id="159204" label="HDAC1" cy:nodeId="107303">
    <graphics y="-603.9883104273251" z="0.0" x="-27.901347973517204"/>
  </node>
  <node id="159198" label="GALNT2" cy:nodeId="107306">
    <graphics y="69.07940807853424" z="0.0" x="-765.3460196043766"/>
  </node>
  <node id="159271" label="CHD2" cy:nodeId="105770">
    <graphics y="-277.08570727791107" z="0.0" x="-32.47045502918127"/>
  </node>
  <node id="159201" label="GNPDA1" cy:nodeId="107305">
    <graphics y="1389.1964735082217" z="0.0" x="-819.0297277952945"/>
  </node>
  <node id="159273" label="CHD1" cy:nodeId="105769">
    <graphics y="-187.21050891365326" z="0.0" x="-205.91144929187658"/>
  </node>
  <node id="159194" label="HOXA6" cy:nodeId="107308">
    <graphics y="371.879640012128" z="0.0" x="-565.3285025145328"/>
  </node>
  <node id="159297" label="NDST2" cy:nodeId="105772">
    <graphics y="-87.14742955650604" z="0.0" x="205.83530821544764"/>
  </node>
  <node id="159197" label="EXT2" cy:nodeId="107307">
    <graphics y="19.969483762127993" z="0.0" x="-978.6486319090641"/>
  </node>
  <node id="159282" label="OGT" cy:nodeId="105771">
    <graphics y="29.956750302655337" z="0.0" x="200.6351739381039"/>
  </node>
  <node id="159180" label="NAAA" cy:nodeId="107310">
    <graphics y="-1444.2900072046689" z="0.0" x="1478.353077075311"/>
  </node>
  <node id="159270" label="CHD8" cy:nodeId="105774">
    <graphics y="-35.091868013995054" z="0.0" x="-216.1757620360172"/>
  </node>
  <node id="159187" label="GBA" cy:nodeId="107309">
    <graphics y="75.69339123283112" z="0.0" x="1580.1149178956234"/>
  </node>
  <node id="159178" label="KAT2B" cy:nodeId="107312">
    <graphics y="-311.5946794458798" z="0.0" x="43.88344969493983"/>
  </node>
  <node id="159184" label="LAMP3" cy:nodeId="105776">
    <graphics y="-1129.6026292749814" z="0.0" x="2248.814991137811"/>
  </node>
  <node id="159179" label="JARID2" cy:nodeId="107311">
    <graphics y="730.4109205297061" z="0.0" x="1375.2802010987484"/>
  </node>
  <node id="159171" label="KDM5C" cy:nodeId="107314">
    <graphics y="169.58055248771393" z="0.0" x="311.1857339356625"/>
  </node>
  <node id="159281" label="GAL3ST4" cy:nodeId="105778">
    <graphics y="-297.83701953377044" z="0.0" x="765.6384774659359"/>
  </node>
  <node id="159177" label="KDM2B" cy:nodeId="107313">
    <graphics y="-586.7443223902158" z="0.0" x="362.2708932374203"/>
  </node>
  <node id="159217" label="MAN2B1" cy:nodeId="105777">
    <graphics y="-818.5985399195126" z="0.0" x="1463.6490975831234"/>
  </node>
  <node id="159169" label="KLF11" cy:nodeId="107316">
    <graphics y="-343.89089831795013" z="0.0" x="512.9644967530453"/>
  </node>
  <node id="159268" label="CPSF3L" cy:nodeId="105780">
    <graphics y="-1214.5030198999814" z="0.0" x="-2115.997508862189"/>
  </node>
  <node id="159170" label="KDM6B" cy:nodeId="107315">
    <graphics y="405.30609264884674" z="0.0" x="-137.39277253406408"/>
  </node>
  <node id="159167" label="KLF5" cy:nodeId="107318">
    <graphics y="446.5102857640811" z="0.0" x="388.0513192628109"/>
  </node>
  <node id="159168" label="KLF4" cy:nodeId="107317">
    <graphics y="651.5982984593936" z="0.0" x="1040.1137582276547"/>
  </node>
  <node id="159267" label="B3GALT6" cy:nodeId="105781">
    <graphics y="-1146.7533861109189" z="0.0" x="-2013.562694409064"/>
  </node>
  <node id="159165" label="LDB1" cy:nodeId="107320">
    <graphics y="978.7720045140811" z="0.0" x="-402.9679678465641"/>
  </node>
  <node id="159166" label="ABO" cy:nodeId="107319">
    <graphics y="364.79147472892487" z="0.0" x="460.46162810070155"/>
  </node>
  <node id="159155" label="MBD2" cy:nodeId="107322">
    <graphics y="-310.21595630134857" z="0.0" x="402.2846871827328"/>
  </node>
  <node id="159162" label="LIN9" cy:nodeId="107321">
    <graphics y="-662.8579393335751" z="0.0" x="179.9845277283871"/>
  </node>
  <node id="159266" label="CREB1" cy:nodeId="105785">
    <graphics y="493.5906080297061" z="0.0" x="-543.1179312254703"/>
  </node>
  <node id="159150" label="MED12" cy:nodeId="107324">
    <graphics y="66.61268749747956" z="0.0" x="256.8660394166195"/>
  </node>
  <node id="159154" label="MBD3" cy:nodeId="107323">
    <graphics y="1174.3413709691592" z="0.0" x="-1905.062419750861"/>
  </node>
  <node id="159142" label="NCOR2" cy:nodeId="107326">
    <graphics y="154.15529003654206" z="0.0" x="-514.0174063231266"/>
  </node>
  <node id="159265" label="CREBBP" cy:nodeId="105790">
    <graphics y="57.603166013104556" z="0.0" x="-53.30883393543127"/>
  </node>
  <node id="159147" label="MEF2D" cy:nodeId="107325">
    <graphics y="-245.44981250252044" z="0.0" x="868.4204598878109"/>
  </node>
  <node id="159188" label="B4GALT3" cy:nodeId="105789">
    <graphics y="-66.22539004768646" z="0.0" x="1245.234180590936"/>
  </node>
  <node id="159140" label="PAPSS2" cy:nodeId="107328">
    <graphics y="227.714600949628" z="0.0" x="-792.1482046629703"/>
  </node>
  <node id="159290" label="POFUT1" cy:nodeId="105792">
    <graphics y="124.19455090079987" z="0.0" x="-640.0402334715641"/>
  </node>
  <node id="159141" label="POFUT2" cy:nodeId="107327">
    <graphics y="355.5703443578311" z="0.0" x="-801.0141104246891"/>
  </node>
  <node id="159328" label="COG7" cy:nodeId="105791">
    <graphics y="112.75370922599518" z="0.0" x="442.3032418702328"/>
  </node>
  <node id="159136" label="NFYB" cy:nodeId="107330">
    <graphics y="-1393.2952562281064" z="0.0" x="264.7499734376156"/>
  </node>
  <node id="159138" label="NFYA" cy:nodeId="107329">
    <graphics y="-295.10781726326263" z="0.0" x="-209.46000275867345"/>
  </node>
  <node id="159134" label="PIGY" cy:nodeId="107332">
    <graphics y="-1535.1280198999814" z="0.0" x="271.5621530030453"/>
  </node>
  <node id="159260" label="E2F1" cy:nodeId="105796">
    <graphics y="1269.9696973851749" z="0.0" x="-1693.9985006834781"/>
  </node>
  <node id="159135" label="B4GALT6" cy:nodeId="107331">
    <graphics y="-1180.4203782984189" z="0.0" x="251.69651427013514"/>
  </node>
  <node id="159264" label="DEK" cy:nodeId="105795">
    <graphics y="1389.1964735082217" z="0.0" x="-1417.7302053953922"/>
  </node>
  <node id="159124" label="PHF8" cy:nodeId="107334">
    <graphics y="-10.461226076739194" z="0.0" x="259.91587462169764"/>
  </node>
  <node id="159129" label="NRF1" cy:nodeId="107333">
    <graphics y="1239.9294141820499" z="0.0" x="-1229.8960531737125"/>
  </node>
  <node id="159121" label="PML" cy:nodeId="107336">
    <graphics y="-1234.8107591577939" z="0.0" x="2347.210010669061"/>
  </node>
  <node id="159156" label="KHK" cy:nodeId="105800">
    <graphics y="-963.7702928492001" z="0.0" x="-1727.717235424689"/>
  </node>
  <node id="159123" label="SLC35A2" cy:nodeId="107335">
    <graphics y="-32.80070743049896" z="0.0" x="607.6173287842953"/>
  </node>
  <node id="159106" label="RYBP" cy:nodeId="107338">
    <graphics y="-434.8016038843564" z="0.0" x="-343.52299103992345"/>
  </node>
  <node id="159110" label="RLF" cy:nodeId="107337">
    <graphics y="-564.7060228296689" z="0.0" x="119.12135519725916"/>
  </node>
  <node id="159102" label="MPI" cy:nodeId="107340">
    <graphics y="-592.6090990015439" z="0.0" x="-201.82453522937658"/>
  </node>
  <node id="159105" label="SETDB1" cy:nodeId="107339">
    <graphics y="-809.2588182398251" z="0.0" x="-421.1688955809391"/>
  </node>
  <node id="159256" label="E2F7" cy:nodeId="105803">
    <graphics y="-24.45036563362396" z="0.0" x="-333.95655427234533"/>
  </node>
  <node id="159098" label="SMAD3" cy:nodeId="107342">
    <graphics y="929.7636426976749" z="0.0" x="-528.2628897215641"/>
  </node>
  <node id="159237" label="ST3GAL2" cy:nodeId="105806">
    <graphics y="1379.8988966039249" z="0.0" x="-1118.163379528693"/>
  </node>
  <node id="159100" label="SMAD1" cy:nodeId="107341">
    <graphics y="-323.991942019122" z="0.0" x="201.29837431652186"/>
  </node>
  <node id="159095" label="SMARCC1" cy:nodeId="107344">
    <graphics y="487.78207531486237" z="0.0" x="-55.83031831043127"/>
  </node>
  <node id="159096" label="SMARCA4" cy:nodeId="107343">
    <graphics y="-255.63177356209076" z="0.0" x="-638.2704580809391"/>
  </node>
  <node id="159091" label="SP2" cy:nodeId="107346">
    <graphics y="-168.11395129646576" z="0.0" x="64.06480040294764"/>
  </node>
  <node id="159212" label="FUT4" cy:nodeId="105810">
    <graphics y="1088.069581418378" z="0.0" x="-600.3993185545719"/>
  </node>
  <node id="159092" label="SOX2" cy:nodeId="107345">
    <graphics y="737.8217481664249" z="0.0" x="624.9260446046078"/>
  </node>
  <node id="159082" label="STAT6" cy:nodeId="107348">
    <graphics y="845.3515333226749" z="0.0" x="551.1786691163265"/>
  </node>
  <node id="159334" label="AHR" cy:nodeId="106836">
    <graphics y="574.5207838109561" z="0.0" x="-449.04273591297033"/>
  </node>
  <node id="159086" label="STAT3" cy:nodeId="107347">
    <graphics y="62.81964245353424" z="0.0" x="-189.35987458484533"/>
  </node>
  <node id="159132" label="PIGK" cy:nodeId="106835">
    <graphics y="530.4682935765811" z="0.0" x="48.55517973644373"/>
  </node>
  <node id="159079" label="LAMP2" cy:nodeId="107350">
    <graphics y="-430.12737903084076" z="0.0" x="198.88889708263514"/>
  </node>
  <node id="159221" label="B3GNT2" cy:nodeId="106838">
    <graphics y="-179.1551958033017" z="0.0" x="-138.7098196532047"/>
  </node>
  <node id="159081" label="SVIL" cy:nodeId="107349">
    <graphics y="-531.5371385523251" z="0.0" x="242.3515359376156"/>
  </node>
  <node id="159075" label="B4GALNT2" cy:nodeId="107352">
    <graphics y="1088.069581418378" z="0.0" x="-400.8324926878727"/>
  </node>
  <node id="159078" label="TAF3" cy:nodeId="107351">
    <graphics y="335.49176159415924" z="0.0" x="-475.9783438231266"/>
  </node>
  <node id="159069" label="TFAP2C" cy:nodeId="107354">
    <graphics y="1279.8988966039249" z="0.0" x="-1329.8960531737125"/>
  </node>
  <node id="159072" label="TERF2" cy:nodeId="107353">
    <graphics y="-501.2641282984189" z="0.0" x="-963.6316641356266"/>
  </node>
  <node id="159062" label="VDR" cy:nodeId="107356">
    <graphics y="-161.6553712793759" z="0.0" x="-717.1933096434391"/>
  </node>
  <node id="159291" label="SLC35E1" cy:nodeId="106844">
    <graphics y="-96.99189910377777" z="0.0" x="-364.46757111804845"/>
  </node>
  <node id="159068" label="TFCP2" cy:nodeId="107355">
    <graphics y="-571.9863878199033" z="0.0" x="-731.2708242918766"/>
  </node>
  <node id="159251" label="EHF" cy:nodeId="105819">
    <graphics y="270.0118421605655" z="0.0" x="39.05514158947108"/>
  </node>
  <node id="159292" label="BRD4" cy:nodeId="106843">
    <graphics y="54.08978405509674" z="0.0" x="-345.9776419188297"/>
  </node>
  <node id="159246" label="ELF1" cy:nodeId="105822">
    <graphics y="-125.37513980354584" z="0.0" x="140.65722145778773"/>
  </node>
  <node id="159280" label="CDK12" cy:nodeId="106848">
    <graphics y="-146.62245044197357" z="0.0" x="-409.08643708484533"/>
  </node>
  <node id="159330" label="COG6" cy:nodeId="105824">
    <graphics y="-15.63581714119232" z="0.0" x="122.13383116466639"/>
  </node>
  <node id="159277" label="COG3" cy:nodeId="105823">
    <graphics y="76.2852796605655" z="0.0" x="149.0955430482113"/>
  </node>
  <node id="159244" label="ELK3" cy:nodeId="105826">
    <graphics y="444.75070324454987" z="0.0" x="-644.3787954832828"/>
  </node>
  <node id="159269" label="CLOCK" cy:nodeId="106849">
    <graphics y="439.36215343986237" z="0.0" x="-436.1966055418766"/>
  </node>
  <node id="159240" label="ERCC6" cy:nodeId="105830">
    <graphics y="164.49742260490143" z="0.0" x="-113.49325166004064"/>
  </node>
  <node id="159243" label="EP400" cy:nodeId="105829">
    <graphics y="-109.20449313606537" z="0.0" x="-167.80399689929845"/>
  </node>
  <node id="159284" label="MAN1C1" cy:nodeId="106853">
    <graphics y="-511.92010364021576" z="0.0" x="954.9559213135922"/>
  </node>
  <node id="159314" label="FUCA1" cy:nodeId="106856">
    <graphics y="-1307.8398118921689" z="0.0" x="1539.6254159424984"/>
  </node>
  <node id="159312" label="ST8SIA4" cy:nodeId="105834">
    <graphics y="-1058.6799608179501" z="0.0" x="1574.4281503174984"/>
  </node>
  <node id="159313" label="ST3GAL5" cy:nodeId="106857">
    <graphics y="-979.5520921656064" z="0.0" x="1446.946338794061"/>
  </node>
  <node id="159311" label="MGAT4A" cy:nodeId="106860">
    <graphics y="-1067.5437913843564" z="0.0" x="1363.952198169061"/>
  </node>
  <node id="159230" label="GALNT7" cy:nodeId="106859">
    <graphics y="425.35995617423737" z="0.0" x="128.78494562847254"/>
  </node>
  <node id="159214" label="GPI" cy:nodeId="106864">
    <graphics y="1389.1964735082217" z="0.0" x="-1218.163379528693"/>
  </node>
  <node id="159215" label="GAPDH" cy:nodeId="106863">
    <graphics y="1379.8988966039249" z="0.0" x="-1317.7302053953922"/>
  </node>
  <node id="159209" label="GRHL1" cy:nodeId="106866">
    <graphics y="261.1224378636905" z="0.0" x="591.1227914307797"/>
  </node>
  <node id="159058" label="MGAT2" cy:nodeId="106868">
    <graphics y="661.2676710179874" z="0.0" x="-71.22404084461095"/>
  </node>
  <node id="159199" label="HIF1A" cy:nodeId="106867">
    <graphics y="-47.058333010332944" z="0.0" x="-695.8650625731266"/>
  </node>
  <node id="159238" label="FLI1" cy:nodeId="105848">
    <graphics y="1389.1964735082217" z="0.0" x="-1018.5965536619938"/>
  </node>
  <node id="159185" label="IRF2" cy:nodeId="106871">
    <graphics y="-1061.4458909937314" z="0.0" x="1993.8258553956234"/>
  </node>
  <node id="159232" label="FOXA1" cy:nodeId="105850">
    <graphics y="459.58688488517487" z="0.0" x="274.5892526124203"/>
  </node>
  <node id="159164" label="LEF1" cy:nodeId="106875">
    <graphics y="1182.2236036351749" z="0.0" x="-987.7431906248844"/>
  </node>
  <node id="159223" label="FOXO1" cy:nodeId="105856">
    <graphics y="-374.67523059334076" z="0.0" x="-52.10528168933752"/>
  </node>
  <node id="159099" label="ALG6" cy:nodeId="106879">
    <graphics y="-499.14373645271576" z="0.0" x="420.9197274659359"/>
  </node>
  <node id="159112" label="GNPNAT1" cy:nodeId="105855">
    <graphics y="397.31369152579987" z="0.0" x="-218.88459382312658"/>
  </node>
  <node id="159220" label="FOXP3" cy:nodeId="105858">
    <graphics y="-975.2739549585751" z="0.0" x="1518.8597909424984"/>
  </node>
  <node id="159219" label="HK3" cy:nodeId="105859">
    <graphics y="-1062.1994920679501" z="0.0" x="1484.4269296143734"/>
  </node>
  <node id="159213" label="GATA6" cy:nodeId="105862">
    <graphics y="1078.7720045140811" z="0.0" x="-699.9661444212711"/>
  </node>
  <node id="159101" label="SIRT6" cy:nodeId="106885">
    <graphics y="1078.7720045140811" z="0.0" x="-2115.997508862189"/>
  </node>
  <node id="159216" label="GABPA" cy:nodeId="105861">
    <graphics y="-30.637762636797788" z="0.0" x="182.07243742687342"/>
  </node>
  <node id="159067" label="THAP11" cy:nodeId="106890">
    <graphics y="-843.6694627710751" z="0.0" x="-1532.639598705939"/>
  </node>
  <node id="159211" label="GLYR1" cy:nodeId="105866">
    <graphics y="80.87944164787018" z="0.0" x="593.5875741456234"/>
  </node>
  <node id="159077" label="TBX21" cy:nodeId="106889">
    <graphics y="-1305.8446947046689" z="0.0" x="1731.0326425049984"/>
  </node>
  <node id="159071" label="COG4" cy:nodeId="106892">
    <graphics y="-695.9337449976376" z="0.0" x="-1287.907176830939"/>
  </node>
  <node id="159210" label="ALG1" cy:nodeId="105867">
    <graphics y="134.4261488011905" z="0.0" x="843.2029916260922"/>
  </node>
  <node id="159279" label="COG8" cy:nodeId="106891">
    <graphics y="-182.94432696785248" z="0.0" x="-482.3325918700016"/>
  </node>
  <node id="159252" label="STT3A" cy:nodeId="106893">
    <graphics y="-121.17564258064544" z="0.0" x="1145.471729419061"/>
  </node>
  <node id="159303" label="PIGO" cy:nodeId="105874">
    <graphics y="-23.580175966875913" z="0.0" x="-267.96961579578283"/>
  </node>
  <node id="159205" label="HCFC1" cy:nodeId="105873">
    <graphics y="-106.08578738655365" z="0.0" x="-228.75257478015783"/>
  </node>
  <node id="159200" label="HECTD1" cy:nodeId="105875">
    <graphics y="300.89630260978424" z="0.0" x="-660.8063467528141"/>
  </node>
  <node id="159253" label="DPAGT1" cy:nodeId="105878">
    <graphics y="-89.59467086281097" z="0.0" x="813.2210580323422"/>
  </node>
  <node id="159195" label="HINFP" cy:nodeId="105877">
    <graphics y="-75.29219874824798" z="0.0" x="1026.2133065674984"/>
  </node>
  <node id="159192" label="TSTA3" cy:nodeId="105880">
    <graphics y="1389.1964735082217" z="0.0" x="-2016.4306829954899"/>
  </node>
  <node id="159193" label="HSF1" cy:nodeId="105879">
    <graphics y="1379.8988966039249" z="0.0" x="-2115.997508862189"/>
  </node>
  <node id="159191" label="IKZF1" cy:nodeId="105882">
    <graphics y="-768.0993333765439" z="0.0" x="1219.5770760987484"/>
  </node>
  <node id="159181" label="LIPA" cy:nodeId="105884">
    <graphics y="-1381.3393236109189" z="0.0" x="1358.2509042237484"/>
  </node>
  <node id="159189" label="INTS3" cy:nodeId="105886">
    <graphics y="19.569695859295962" z="0.0" x="1447.7826425049984"/>
  </node>
  <node id="159190" label="INO80" cy:nodeId="105885">
    <graphics y="-627.6236864038876" z="0.0" x="273.9607125733578"/>
  </node>
  <node id="159183" label="IRF4" cy:nodeId="105888">
    <graphics y="-970.4773851343564" z="0.0" x="1605.595508715936"/>
  </node>
  <node id="159186" label="IRF1" cy:nodeId="105887">
    <graphics y="-1125.3345628687314" z="0.0" x="1442.8759042237484"/>
  </node>
  <node id="159182" label="IRF8" cy:nodeId="105890">
    <graphics y="-1248.3266282984189" z="0.0" x="1447.0848885987484"/>
  </node>
  <node id="159233" label="MGAT5" cy:nodeId="105893">
    <graphics y="266.723390012128" z="0.0" x="-351.12525544422033"/>
  </node>
  <node id="159143" label="FKRP" cy:nodeId="105896">
    <graphics y="1379.8988966039249" z="0.0" x="-1716.8638571287906"/>
  </node>
  <node id="159174" label="KDM5A" cy:nodeId="105904">
    <graphics y="140.78915539298737" z="0.0" x="-31.063106396368767"/>
  </node>
  <node id="159175" label="KDM3A" cy:nodeId="105903">
    <graphics y="348.6575025609561" z="0.0" x="230.18055357677576"/>
  </node>
  <node id="159115" label="HS2ST1" cy:nodeId="105906">
    <graphics y="-229.7179399439267" z="0.0" x="-266.6598623778141"/>
  </node>
  <node id="159085" label="GNS" cy:nodeId="105905">
    <graphics y="62.66465893302643" z="0.0" x="-558.4795645262516"/>
  </node>
  <node id="159116" label="B3GALNT2" cy:nodeId="105908">
    <graphics y="-431.36611804451263" z="0.0" x="20.02676787120936"/>
  </node>
  <node id="159173" label="KDM5B" cy:nodeId="105907">
    <graphics y="-34.34773883308685" z="0.0" x="-72.10245881336095"/>
  </node>
  <node id="159159" label="RENBP" cy:nodeId="105912">
    <graphics y="-1037.0997606226376" z="0.0" x="1841.971729419061"/>
  </node>
  <node id="159161" label="LYL1" cy:nodeId="105911">
    <graphics y="-905.2271409937314" z="0.0" x="1697.508106372186"/>
  </node>
  <node id="159157" label="MAZ" cy:nodeId="105916">
    <graphics y="-1064.1169725367001" z="0.0" x="-1886.2083242918766"/>
  </node>
  <node id="159229" label="ST6GALNAC1" cy:nodeId="105920">
    <graphics y="763.3119215062686" z="0.0" x="271.5763131592953"/>
  </node>
  <node id="159152" label="MECOM" cy:nodeId="105919">
    <graphics y="754.1001295140811" z="0.0" x="175.85614027721522"/>
  </node>
  <node id="159151" label="MED1" cy:nodeId="105924">
    <graphics y="-102.29735431160248" z="0.0" x="-527.3831900145328"/>
  </node>
  <node id="159225" label="NDST1" cy:nodeId="105923">
    <graphics y="-215.61367663826263" z="0.0" x="-1007.9331778075016"/>
  </node>
  <node id="159148" label="MEF2A" cy:nodeId="105925">
    <graphics y="-208.0581270166806" z="0.0" x="-54.89838776843908"/>
  </node>
  <node id="159146" label="MEIS1" cy:nodeId="105928">
    <graphics y="-205.20480212654388" z="0.0" x="448.77339567882655"/>
  </node>
  <node id="159145" label="MRE11A" cy:nodeId="105931">
    <graphics y="-0.41201648201263197" z="0.0" x="491.51585783702967"/>
  </node>
  <node id="159144" label="MZF1" cy:nodeId="105942">
    <graphics y="1389.1964735082217" z="0.0" x="-1617.2970312620914"/>
  </node>
  <node id="159235" label="HAS3" cy:nodeId="105941">
    <graphics y="711.2063917211124" z="0.0" x="1219.3573495362484"/>
  </node>
  <node id="159139" label="NFAT5" cy:nodeId="105943">
    <graphics y="-13.832487673418882" z="0.0" x="-498.1330069090641"/>
  </node>
  <node id="159131" label="NPAT" cy:nodeId="105948">
    <graphics y="-100.08771953071869" z="0.0" x="445.3696786378109"/>
  </node>
  <node id="159133" label="NIPBL" cy:nodeId="105947">
    <graphics y="211.4166273168155" z="0.0" x="-8.729549267462517"/>
  </node>
  <node id="159289" label="SLC35D1" cy:nodeId="105950">
    <graphics y="113.667237668378" z="0.0" x="-218.53129182117345"/>
  </node>
  <node id="159130" label="NR2C2" cy:nodeId="105949">
    <graphics y="18.485543637616274" z="0.0" x="-91.03301606433752"/>
  </node>
  <node id="159137" label="PIGM" cy:nodeId="105954">
    <graphics y="-441.98480090584076" z="0.0" x="-234.57850251453283"/>
  </node>
  <node id="159127" label="PBX1" cy:nodeId="105953">
    <graphics y="-48.769331545489194" z="0.0" x="333.4802438233578"/>
  </node>
  <node id="159126" label="PHF20" cy:nodeId="105956">
    <graphics y="209.80569592033112" z="0.0" x="-931.7229727293766"/>
  </node>
  <node id="159122" label="PIAS1" cy:nodeId="105958">
    <graphics y="121.4203657201358" z="0.0" x="-359.7349356200016"/>
  </node>
  <node id="159125" label="PHF6" cy:nodeId="105957">
    <graphics y="-288.41651782478607" z="0.0" x="600.2774850342953"/>
  </node>
  <node id="159119" label="POLR3A" cy:nodeId="105960">
    <graphics y="201.69723644767487" z="0.0" x="-381.7658194090641"/>
  </node>
  <node id="159120" label="POLR2B" cy:nodeId="105959">
    <graphics y="-182.16580066170013" z="0.0" x="0.3705178712093584"/>
  </node>
  <node id="159118" label="RB1" cy:nodeId="105965">
    <graphics y="234.52005138908112" z="0.0" x="480.24217619640467"/>
  </node>
</graph>
