# Supplementary material for: A systems-based framework to computationally describe putative transcription factors and signaling pathways regulating glycan biosynthesis
Source: publisher site journal article supplement (doi:10.3762/bjoc.17.119), 2021-07-22
Supplement: Additional file 2 [file 1860-5397-17-119-S2.cys › CytoscapeSession-2021_03_21-12_01/views/107960-140593-COAD_READ.xgmml]

<?xml version="1.0" encoding="UTF-8" standalone="yes"?>
<graph id="140593" label="COAD_READ" cy:view="1" cy:networkId="107960" cy:visualStyle="default" cy:rendererId="org.cytoscape.ding" cy:documentVersion="3.0" xmlns:dc="http://purl.org/dc/elements/1.1/" xmlns:xlink="http://www.w3.org/1999/xlink" xmlns:rdf="http://www.w3.org/1999/02/22-rdf-syntax-ns#" xmlns:cy="http://www.cytoscape.org" xmlns="http://www.cs.rpi.edu/XGMML">
  <graphics>
    <att name="NETWORK_NODE_SELECTION" value="true" type="string" cy:type="String"/>
    <att name="NETWORK_CENTER_X_LOCATION" value="-1.294189453125" type="string" cy:type="String"/>
    <att name="NETWORK_HEIGHT" value="510.0" type="string" cy:type="String"/>
    <att name="NETWORK_TITLE" value="COAD_READ" type="string" cy:type="String"/>
    <att name="NETWORK_EDGE_SELECTION" value="true" type="string" cy:type="String"/>
    <att name="NETWORK_CENTER_Y_LOCATION" value="85.83172607421875" type="string" cy:type="String"/>
    <att name="NETWORK_WIDTH" value="1312.0" type="string" cy:type="String"/>
    <att name="NETWORK_DEPTH" value="0.0" type="string" cy:type="String"/>
    <att name="NETWORK_SCALE_FACTOR" value="0.1227186794454265" type="string" cy:type="String"/>
    <att name="NETWORK_ANNOTATION_SELECTION" value="false" type="string" cy:type="String"/>
    <att name="NETWORK_CENTER_Z_LOCATION" value="0.0" type="string" cy:type="String"/>
  </graphics>
  <node id="140651" label="RBL2" cy:nodeId="105968">
    <graphics y="-1116.1561626707896" z="0.0" x="-1705.4040269576585"/>
  </node>
  <node id="140675" label="NOTCH1" cy:nodeId="108016">
    <graphics y="-263.37747805470076" z="0.0" x="-180.57175156703352"/>
  </node>
  <node id="140654" label="RBBP5" cy:nodeId="105967">
    <graphics y="-110.87939112537947" z="0.0" x="534.2506056107009"/>
  </node>
  <node id="140679" label="B4GALNT3" cy:nodeId="108015">
    <graphics y="629.4456439698354" z="0.0" x="-19.318028422502266"/>
  </node>
  <node id="140647" label="REST" cy:nodeId="105970">
    <graphics y="131.978755542101" z="0.0" x="1109.282374409529"/>
  </node>
  <node id="140669" label="CHST14" cy:nodeId="108018">
    <graphics y="1240.1438861573354" z="0.0" x="911.8083143509352"/>
  </node>
  <node id="140671" label="NR2F2" cy:nodeId="108017">
    <graphics y="934.6141010010854" z="0.0" x="809.7878065384352"/>
  </node>
  <node id="140650" label="RCOR1" cy:nodeId="105969">
    <graphics y="-1472.1662945067271" z="0.0" x="1742.399561909529"/>
  </node>
  <node id="140661" label="PIGB" cy:nodeId="108020">
    <graphics y="76.66256291514787" z="0.0" x="667.0930433548415"/>
  </node>
  <node id="140668" label="PDX1" cy:nodeId="108019">
    <graphics y="-618.0458721434459" z="0.0" x="-1391.462254496721"/>
  </node>
  <node id="140646" label="RFX7" cy:nodeId="105974">
    <graphics y="-26.830768994031814" z="0.0" x="399.5310316360915"/>
  </node>
  <node id="140652" label="RBL1" cy:nodeId="108022">
    <graphics y="-862.6802105223521" z="0.0" x="-939.498387309221"/>
  </node>
  <node id="140656" label="PRDM4" cy:nodeId="108021">
    <graphics y="406.4496112549916" z="0.0" x="6.180537251325859"/>
  </node>
  <node id="140648" label="RELA" cy:nodeId="108024">
    <graphics y="-618.340824536024" z="0.0" x="369.04841139683367"/>
  </node>
  <node id="140769" label="FPGT" cy:nodeId="105976">
    <graphics y="1726.8612323487416" z="0.0" x="-1902.4199990951097"/>
  </node>
  <node id="140649" label="POMT2" cy:nodeId="108023">
    <graphics y="-1605.4230083739146" z="0.0" x="1751.829493550154"/>
  </node>
  <node id="140645" label="RNF2" cy:nodeId="105975">
    <graphics y="-284.80072443836775" z="0.0" x="1184.9372816360915"/>
  </node>
  <node id="140637" label="GLA" cy:nodeId="108026">
    <graphics y="-680.3836712157115" z="0.0" x="-348.61563584437727"/>
  </node>
  <node id="140644" label="RUNX1" cy:nodeId="105978">
    <graphics y="739.8377948487416" z="0.0" x="603.3976698196852"/>
  </node>
  <node id="140639" label="SCML2" cy:nodeId="108025">
    <graphics y="-717.6875652586803" z="0.0" x="-536.4884996139085"/>
  </node>
  <node id="140629" label="SRC" cy:nodeId="108028">
    <graphics y="-542.9517559325084" z="0.0" x="-836.112889262346"/>
  </node>
  <node id="140631" label="PIGA" cy:nodeId="108027">
    <graphics y="-427.2432140623912" z="0.0" x="-89.80547043910383"/>
  </node>
  <node id="140789" label="SULF2" cy:nodeId="105979">
    <graphics y="-1464.0228618895396" z="0.0" x="-1735.6537828170335"/>
  </node>
  <node id="140617" label="TBP" cy:nodeId="108030">
    <graphics y="-977.1728863036021" z="0.0" x="-929.9960679732835"/>
  </node>
  <node id="140641" label="RUNX3" cy:nodeId="105982">
    <graphics y="1013.1521869385854" z="0.0" x="1011.3830213821852"/>
  </node>
  <node id="140623" label="STAT5B" cy:nodeId="108029">
    <graphics y="-252.56264536732283" z="0.0" x="-645.8619737350023"/>
  </node>
  <node id="140642" label="RUNX2" cy:nodeId="105981">
    <graphics y="1003.8870502198354" z="0.0" x="538.3374281204665"/>
  </node>
  <node id="140614" label="B3GNT9" cy:nodeId="108032">
    <graphics y="1228.2080951417104" z="0.0" x="747.692042378279"/>
  </node>
  <node id="140615" label="TCF21" cy:nodeId="108031">
    <graphics y="892.1422992432729" z="0.0" x="634.9335584915602"/>
  </node>
  <node id="140610" label="B3GALT5" cy:nodeId="108034">
    <graphics y="-1933.0331157957896" z="0.0" x="1272.7971449173415"/>
  </node>
  <node id="140613" label="HS3ST3A1" cy:nodeId="108033">
    <graphics y="1225.3078265870229" z="0.0" x="636.4716444290602"/>
  </node>
  <node id="140905" label="UGCG" cy:nodeId="105985">
    <graphics y="369.4848895753041" z="0.0" x="721.8803968704665"/>
  </node>
  <node id="140606" label="TFDP1" cy:nodeId="108036">
    <graphics y="-971.0218242918834" z="0.0" x="-828.2219590865648"/>
  </node>
  <node id="140607" label="TEAD4" cy:nodeId="108035">
    <graphics y="-1459.0417827879771" z="0.0" x="-507.1489000045335"/>
  </node>
  <node id="140599" label="GMPPB" cy:nodeId="108038">
    <graphics y="-846.7906231200084" z="0.0" x="1834.8449964798415"/>
  </node>
  <node id="140600" label="XBP1" cy:nodeId="108037">
    <graphics y="-905.7478985106334" z="0.0" x="1699.7282972610915"/>
  </node>
  <node id="140632" label="SMC1A" cy:nodeId="105989">
    <graphics y="-264.0217670714244" z="0.0" x="78.96047118076922"/>
  </node>
  <node id="140596" label="ZBTB2" cy:nodeId="108039">
    <graphics y="-351.6413311278209" z="0.0" x="-541.8955430709398"/>
  </node>
  <node id="140630" label="SPDEF" cy:nodeId="105993">
    <graphics y="-963.5329937254771" z="0.0" x="1397.3344984329665"/>
  </node>
  <node id="140628" label="SREBF2" cy:nodeId="105995">
    <graphics y="421.1220966065541" z="0.0" x="1904.6521253860915"/>
  </node>
  <node id="140848" label="GANAB" cy:nodeId="105998">
    <graphics y="-408.2194408690318" z="0.0" x="355.5810804642165"/>
  </node>
  <node id="140720" label="HPSE" cy:nodeId="106000">
    <graphics y="-1234.5513042723521" z="0.0" x="983.1076307571852"/>
  </node>
  <node id="140627" label="STAT1" cy:nodeId="105999">
    <graphics y="724.3753314698354" z="0.0" x="849.8385877884352"/>
  </node>
  <node id="140622" label="SUMO2" cy:nodeId="106004">
    <graphics y="1705.0429950440541" z="0.0" x="-1650.9942483626878"/>
  </node>
  <node id="140620" label="TAF1" cy:nodeId="106006">
    <graphics y="-379.00787775868025" z="0.0" x="66.39641096958758"/>
  </node>
  <node id="140841" label="COG1" cy:nodeId="106005">
    <graphics y="-127.53949396961775" z="0.0" x="-835.0030870162523"/>
  </node>
  <node id="140612" label="TCF7" cy:nodeId="106008">
    <graphics y="-603.4651836668834" z="0.0" x="-911.986668559221"/>
  </node>
  <node id="140616" label="TCF12" cy:nodeId="106007">
    <graphics y="725.8865009034291" z="0.0" x="1415.9468031204665"/>
  </node>
  <node id="140611" label="TCF7L2" cy:nodeId="106010">
    <graphics y="-1791.3954204832896" z="0.0" x="1263.931056050154"/>
  </node>
  <node id="140854" label="ALG5" cy:nodeId="106012">
    <graphics y="-949.8730816161021" z="0.0" x="-1158.0578355514085"/>
  </node>
  <node id="140609" label="TDRD3" cy:nodeId="106011">
    <graphics y="-1108.3059429442271" z="0.0" x="-1356.517918559221"/>
  </node>
  <node id="140608" label="TEAD1" cy:nodeId="106013">
    <graphics y="510.8942523682729" z="0.0" x="479.4367018021071"/>
  </node>
  <node id="140604" label="TRIM28" cy:nodeId="106018">
    <graphics y="1705.0429950440541" z="0.0" x="-1408.8413858138597"/>
  </node>
  <node id="140603" label="TTF2" cy:nodeId="106019">
    <graphics y="-315.03624384754744" z="0.0" x="298.64847853550555"/>
  </node>
  <node id="140601" label="WDR5" cy:nodeId="106024">
    <graphics y="-155.58622401112166" z="0.0" x="-1169.0373277389085"/>
  </node>
  <node id="140598" label="YAP1" cy:nodeId="106026">
    <graphics y="-820.5130352293834" z="0.0" x="-157.88052842250227"/>
  </node>
  <node id="140597" label="YY1" cy:nodeId="106028">
    <graphics y="-1463.1245464598521" z="0.0" x="1948.8066664017165"/>
  </node>
  <node id="140663" label="C1GALT1C1" cy:nodeId="106032">
    <graphics y="-564.0491070067271" z="0.0" x="-304.18298813929914"/>
  </node>
  <node id="140595" label="ZBTB33" cy:nodeId="106031">
    <graphics y="-497.5684551512584" z="0.0" x="-223.91312119593977"/>
  </node>
  <node id="140818" label="STT3B" cy:nodeId="105688">
    <graphics y="-206.3497242247447" z="0.0" x="581.3565626419509"/>
  </node>
  <node id="140879" label="MAN1A2" cy:nodeId="105687">
    <graphics y="-124.47115748280135" z="0.0" x="453.21053603062273"/>
  </node>
  <node id="140891" label="FUT11" cy:nodeId="105690">
    <graphics y="274.3104510987416" z="0.0" x="870.322657612654"/>
  </node>
  <node id="140847" label="NEU3" cy:nodeId="105689">
    <graphics y="-192.46994822376814" z="0.0" x="55.37848189243914"/>
  </node>
  <node id="140844" label="COG5" cy:nodeId="105692">
    <graphics y="-760.4426616942271" z="0.0" x="-1285.4565171920335"/>
  </node>
  <node id="140728" label="ACER2" cy:nodeId="105691">
    <graphics y="-1368.2859234129771" z="0.0" x="1224.1882581985915"/>
  </node>
  <node id="140745" label="MAN2A1" cy:nodeId="105694">
    <graphics y="212.25576359874162" z="0.0" x="638.3861952103102"/>
  </node>
  <node id="140725" label="SLC35A3" cy:nodeId="105695">
    <graphics y="-1194.1617779051646" z="0.0" x="1315.7041273392165"/>
  </node>
  <node id="140903" label="RTF1" cy:nodeId="105700">
    <graphics y="731.6141620362416" z="0.0" x="1205.365870503279"/>
  </node>
  <node id="140904" label="ARID2" cy:nodeId="105699">
    <graphics y="855.6911273682729" z="0.0" x="1393.0224867142165"/>
  </node>
  <node id="140893" label="SLC35A5" cy:nodeId="105702">
    <graphics y="-1220.6191753661021" z="0.0" x="-1982.8503160201585"/>
  </node>
  <node id="140894" label="ATF1" cy:nodeId="105701">
    <graphics y="-1178.5909771239146" z="0.0" x="-2099.3945054732835"/>
  </node>
  <node id="140892" label="ATF2" cy:nodeId="105704">
    <graphics y="335.3383441651479" z="0.0" x="577.0917616165602"/>
  </node>
  <node id="140890" label="UGGT1" cy:nodeId="105705">
    <graphics y="-85.03758662098494" z="0.0" x="219.89525893101336"/>
  </node>
  <node id="140870" label="HAS1" cy:nodeId="105708">
    <graphics y="993.2609515870229" z="0.0" x="1174.3559828079665"/>
  </node>
  <node id="140724" label="B3GNT5" cy:nodeId="105707">
    <graphics y="-1560.8125347411021" z="0.0" x="1267.3742933548415"/>
  </node>
  <node id="140883" label="ATRX" cy:nodeId="105712">
    <graphics y="555.3751483643666" z="0.0" x="1001.3879652298415"/>
  </node>
  <node id="140807" label="ALG10" cy:nodeId="105711">
    <graphics y="1543.8855853760854" z="0.0" x="-2259.5727281295335"/>
  </node>
  <node id="140880" label="BACH1" cy:nodeId="105714">
    <graphics y="256.7430072510854" z="0.0" x="567.9562635696852"/>
  </node>
  <node id="140736" label="FKTN" cy:nodeId="105713">
    <graphics y="-86.76039545887556" z="0.0" x="-1490.271336527971"/>
  </node>
  <node id="140887" label="CSGALNACT2" cy:nodeId="105715">
    <graphics y="609.4861102784291" z="0.0" x="661.137599018904"/>
  </node>
  <node id="140872" label="CHST11" cy:nodeId="105718">
    <graphics y="789.7674213135854" z="0.0" x="779.3799696243727"/>
  </node>
  <node id="140753" label="CHSY1" cy:nodeId="105717">
    <graphics y="666.1740375245229" z="0.0" x="910.1663465774977"/>
  </node>
  <node id="140773" label="GFPT2" cy:nodeId="105719">
    <graphics y="824.3866840088979" z="0.0" x="454.39388563999773"/>
  </node>
  <node id="140874" label="MGAT1" cy:nodeId="105724">
    <graphics y="650.6609760010854" z="0.0" x="1008.4637098587477"/>
  </node>
  <node id="140876" label="BATF3" cy:nodeId="105723">
    <graphics y="794.7415424073354" z="0.0" x="900.1726942337477"/>
  </node>
  <node id="140868" label="BRCA1" cy:nodeId="105728">
    <graphics y="-1188.7629131590709" z="0.0" x="-733.6245469771898"/>
  </node>
  <node id="140698" label="PIGN" cy:nodeId="105730">
    <graphics y="2095.3989062989367" z="0.0" x="-2259.5727281295335"/>
  </node>
  <node id="140867" label="PIGW" cy:nodeId="105729">
    <graphics y="-1030.6020855223521" z="0.0" x="-675.2402085982835"/>
  </node>
  <node id="140653" label="FAM20B" cy:nodeId="105731">
    <graphics y="-232.63941829556074" z="0.0" x="1059.144923237654"/>
  </node>
  <node id="140865" label="ALG12" cy:nodeId="105734">
    <graphics y="399.4411273682729" z="0.0" x="1765.536768940779"/>
  </node>
  <node id="140866" label="BRD1" cy:nodeId="105733">
    <graphics y="371.3718524659291" z="0.0" x="1554.894923237654"/>
  </node>
  <node id="140657" label="B4GALT1" cy:nodeId="107274">
    <graphics y="492.9581561768666" z="0.0" x="1078.4059706009352"/>
  </node>
  <node id="140855" label="CBFB" cy:nodeId="105739">
    <graphics y="-894.3443340575084" z="0.0" x="-1052.089695902971"/>
  </node>
  <node id="140853" label="CBX3" cy:nodeId="105741">
    <graphics y="-1037.7972149168834" z="0.0" x="-1062.6159410201585"/>
  </node>
  <node id="140850" label="RFNG" cy:nodeId="105744">
    <graphics y="184.18169743663225" z="0.0" x="-1488.409275981096"/>
  </node>
  <node id="140898" label="B4GALT5" cy:nodeId="107279">
    <graphics y="-180.5135425841197" z="0.0" x="-524.833104106096"/>
  </node>
  <node id="140746" label="ST6GALNAC6" cy:nodeId="105746">
    <graphics y="-547.1517071043834" z="0.0" x="1128.447657612654"/>
  </node>
  <node id="140799" label="SLC35B3" cy:nodeId="107281">
    <graphics y="-965.3425640379771" z="0.0" x="-1506.2572984420335"/>
  </node>
  <node id="140864" label="MAN2A2" cy:nodeId="105748">
    <graphics y="349.6977191651479" z="0.0" x="1236.467921284529"/>
  </node>
  <node id="140804" label="ALG8" cy:nodeId="107286">
    <graphics y="1940.6437030518666" z="0.0" x="-2039.7297067367113"/>
  </node>
  <node id="140635" label="IDUA" cy:nodeId="105749">
    <graphics y="-335.1936535155162" z="0.0" x="1520.6067152298415"/>
  </node>
  <node id="140805" label="EED" cy:nodeId="107285">
    <graphics y="1898.6349750245229" z="0.0" x="-2150.682999583391"/>
  </node>
  <node id="140851" label="CBX8" cy:nodeId="105752">
    <graphics y="-43.81634943836775" z="0.0" x="-1310.778172465471"/>
  </node>
  <node id="140716" label="HYAL1" cy:nodeId="105751">
    <graphics y="-1089.6079448973521" z="0.0" x="1022.860255268904"/>
  </node>
  <node id="140826" label="B3GAT3" cy:nodeId="105754">
    <graphics y="277.5252643311635" z="0.0" x="-1285.195164652971"/>
  </node>
  <node id="140846" label="CDK8" cy:nodeId="105756">
    <graphics y="-740.8463177000865" z="0.0" x="-969.9089097701585"/>
  </node>
  <node id="140813" label="DPM2" cy:nodeId="105758">
    <graphics y="-329.9475673949107" z="0.0" x="-763.7933702193773"/>
  </node>
  <node id="140750" label="PIGQ" cy:nodeId="105759">
    <graphics y="1595.6529193604604" z="0.0" x="-1072.875527354387"/>
  </node>
  <node id="140795" label="FOSL2" cy:nodeId="107295">
    <graphics y="410.0324359620229" z="0.0" x="638.9734754837477"/>
  </node>
  <node id="140726" label="GNE" cy:nodeId="107297">
    <graphics y="-1088.3506817137584" z="0.0" x="1387.398097065779"/>
  </node>
  <node id="140798" label="ALG11" cy:nodeId="107300">
    <graphics y="-882.2453960692271" z="0.0" x="-1349.6730699264085"/>
  </node>
  <node id="140840" label="CEBPA" cy:nodeId="105764">
    <graphics y="-446.30104487293806" z="0.0" x="-962.488865824846"/>
  </node>
  <node id="140748" label="MFNG" cy:nodeId="105766">
    <graphics y="696.7223773682729" z="0.0" x="763.2665663040602"/>
  </node>
  <node id="140782" label="NAGK" cy:nodeId="105765">
    <graphics y="507.1036029542104" z="0.0" x="826.149317768904"/>
  </node>
  <node id="140763" label="HDAC3" cy:nodeId="107304">
    <graphics y="2095.3989062989367" z="0.0" x="-1860.439076396135"/>
  </node>
  <node id="140830" label="A4GALT" cy:nodeId="105768">
    <graphics y="827.0765033448354" z="0.0" x="681.6401014603102"/>
  </node>
  <node id="140838" label="CEBPB" cy:nodeId="105767">
    <graphics y="-527.426029614149" z="0.0" x="-922.5080308639085"/>
  </node>
  <node id="140835" label="CHD2" cy:nodeId="105770">
    <graphics y="392.8263812745229" z="0.0" x="928.4414320267165"/>
  </node>
  <node id="140762" label="GNPDA1" cy:nodeId="107305">
    <graphics y="2104.6964832032336" z="0.0" x="-1760.8722505294359"/>
  </node>
  <node id="140836" label="CHD1" cy:nodeId="105769">
    <graphics y="1.0361743653431859" z="0.0" x="92.71405127415301"/>
  </node>
  <node id="140834" label="NDST2" cy:nodeId="105772">
    <graphics y="172.77834660655412" z="0.0" x="543.9465284622634"/>
  </node>
  <node id="140672" label="OGT" cy:nodeId="105771">
    <graphics y="-330.5362591063365" z="0.0" x="0.26737501988054646"/>
  </node>
  <node id="140833" label="CHD4" cy:nodeId="105773">
    <graphics y="-280.35511439198103" z="0.0" x="207.75329115757586"/>
  </node>
  <node id="140831" label="LAMP3" cy:nodeId="105776">
    <graphics y="748.8675189698354" z="0.0" x="1020.6156873978102"/>
  </node>
  <node id="140744" label="JARID2" cy:nodeId="107311">
    <graphics y="-471.744877270399" z="0.0" x="-565.0277452193773"/>
  </node>
  <node id="140832" label="CIITA" cy:nodeId="105775">
    <graphics y="879.2358051026479" z="0.0" x="963.7807264603102"/>
  </node>
  <node id="140738" label="KDM2B" cy:nodeId="107313">
    <graphics y="-85.67555659168806" z="0.0" x="-17.066258402971016"/>
  </node>
  <node id="140828" label="CPSF3L" cy:nodeId="105780">
    <graphics y="368.3532367432729" z="0.0" x="-1493.5102281295335"/>
  </node>
  <node id="140730" label="KDM6B" cy:nodeId="107315">
    <graphics y="623.8962665284291" z="0.0" x="374.5090894974196"/>
  </node>
  <node id="140871" label="DSE" cy:nodeId="105779">
    <graphics y="987.8378558838979" z="0.0" x="886.3249769485915"/>
  </node>
  <node id="140711" label="KLF5" cy:nodeId="107318">
    <graphics y="-1278.7322124754771" z="0.0" x="-1533.6344957076585"/>
  </node>
  <node id="140729" label="KLF4" cy:nodeId="107317">
    <graphics y="-1147.8271221434459" z="0.0" x="1188.546778706404"/>
  </node>
  <node id="140827" label="B3GALT6" cy:nodeId="105781">
    <graphics y="438.3928485596791" z="0.0" x="-1639.2052964889085"/>
  </node>
  <node id="140825" label="POMGNT1" cy:nodeId="105783">
    <graphics y="519.0989032471791" z="0.0" x="-1527.544774027971"/>
  </node>
  <node id="140699" label="MBD2" cy:nodeId="107322">
    <graphics y="2104.6964832032336" z="0.0" x="-2160.0059022628343"/>
  </node>
  <node id="140695" label="MED12" cy:nodeId="107324">
    <graphics y="-61.197040966688064" z="0.0" x="-111.7821244918382"/>
  </node>
  <node id="140697" label="MBD3" cy:nodeId="107323">
    <graphics y="1543.8855853760854" z="0.0" x="-978.9114770614183"/>
  </node>
  <node id="140680" label="NCOR2" cy:nodeId="107326">
    <graphics y="507.4163470948354" z="0.0" x="190.35792830357195"/>
  </node>
  <node id="140824" label="CREBBP" cy:nodeId="105790">
    <graphics y="270.1357074463979" z="0.0" x="406.03866103062273"/>
  </node>
  <node id="140900" label="POFUT1" cy:nodeId="105792">
    <graphics y="-512.807133129774" z="0.0" x="-682.327244731096"/>
  </node>
  <node id="140705" label="POFUT2" cy:nodeId="107327">
    <graphics y="1647.3371844971791" z="0.0" x="-878.9114770614183"/>
  </node>
  <node id="140821" label="CTNNB1" cy:nodeId="105794">
    <graphics y="190.90264470225725" z="0.0" x="-252.95139023890852"/>
  </node>
  <node id="140678" label="NFYA" cy:nodeId="107329">
    <graphics y="-252.21209376209822" z="0.0" x="1792.4104261673415"/>
  </node>
  <node id="140822" label="CTBP1" cy:nodeId="105793">
    <graphics y="411.4773822510854" z="0.0" x="-1290.743504496721"/>
  </node>
  <node id="140768" label="PIGY" cy:nodeId="107332">
    <graphics y="1735.6412463868276" z="0.0" x="-1750.9942483626878"/>
  </node>
  <node id="140815" label="E2F1" cy:nodeId="105796">
    <graphics y="-676.631596020399" z="0.0" x="-693.5007676803148"/>
  </node>
  <node id="140666" label="PHF8" cy:nodeId="107334">
    <graphics y="-601.8139995848521" z="0.0" x="-420.9875230514085"/>
  </node>
  <node id="140739" label="SLC35B1" cy:nodeId="105798">
    <graphics y="1624.4632526124135" z="0.0" x="-1579.9189614974534"/>
  </node>
  <node id="140814" label="ALG3" cy:nodeId="105797">
    <graphics y="-878.0244488036021" z="0.0" x="-576.486424418596"/>
  </node>
  <node id="140859" label="KHK" cy:nodeId="105800">
    <graphics y="-1296.1138042723521" z="0.0" x="-559.2749376021898"/>
  </node>
  <node id="140665" label="SLC35A2" cy:nodeId="107335">
    <graphics y="-800.1633037840709" z="0.0" x="-351.02405259242414"/>
  </node>
  <node id="140899" label="DPM1" cy:nodeId="105799">
    <graphics y="-701.8204082762584" z="0.0" x="-844.838475199846"/>
  </node>
  <node id="140640" label="RYBP" cy:nodeId="107338">
    <graphics y="-1668.2558941161021" z="0.0" x="1350.4101820267165"/>
  </node>
  <node id="140809" label="E2F6" cy:nodeId="105801">
    <graphics y="-651.5323833739146" z="0.0" x="-1089.0424546920335"/>
  </node>
  <node id="140636" label="SETDB1" cy:nodeId="107339">
    <graphics y="-267.34440272205916" z="0.0" x="1418.2453871048415"/>
  </node>
  <node id="140808" label="E2F7" cy:nodeId="105803">
    <graphics y="1650.7241473878041" z="0.0" x="-2225.003031703142"/>
  </node>
  <node id="140634" label="SMAD1" cy:nodeId="107341">
    <graphics y="-531.4278911864146" z="0.0" x="824.576808003279"/>
  </node>
  <node id="140643" label="CSGALNACT1" cy:nodeId="105805">
    <graphics y="1093.5089984620229" z="0.0" x="760.5551405228102"/>
  </node>
  <node id="140633" label="SMARCC1" cy:nodeId="107344">
    <graphics y="-133.9327663695201" z="0.0" x="-283.56421372523664"/>
  </node>
  <node id="140823" label="CHST3" cy:nodeId="105807">
    <graphics y="817.9325824463979" z="0.0" x="524.5815687454665"/>
  </node>
  <node id="140708" label="TPST1" cy:nodeId="105809">
    <graphics y="1068.6794086182729" z="0.0" x="655.3293104446852"/>
  </node>
  <node id="140906" label="AHR" cy:nodeId="106836">
    <graphics y="152.35152775889787" z="0.0" x="880.7245741165602"/>
  </node>
  <node id="140624" label="STAT3" cy:nodeId="107347">
    <graphics y="163.96889836436662" z="0.0" x="752.238673237654"/>
  </node>
  <node id="140779" label="PIGK" cy:nodeId="106835">
    <graphics y="-1404.4952739989146" z="0.0" x="-2259.5727281295335"/>
  </node>
  <node id="140869" label="ST3GAL6" cy:nodeId="105811">
    <graphics y="890.0877338135854" z="0.0" x="712.701808003279"/>
  </node>
  <node id="140664" label="LAMP2" cy:nodeId="107350">
    <graphics y="-658.2993816649303" z="0.0" x="-226.50613877406477"/>
  </node>
  <node id="140621" label="SVIL" cy:nodeId="107349">
    <graphics y="1443.8855853760854" z="0.0" x="486.95128920445086"/>
  </node>
  <node id="140897" label="ASCL2" cy:nodeId="106837">
    <graphics y="-310.48280756825056" z="0.0" x="-1356.259617777971"/>
  </node>
  <node id="140721" label="B4GALNT2" cy:nodeId="107352">
    <graphics y="-963.6037945067271" z="0.0" x="1285.694727925154"/>
  </node>
  <node id="140618" label="TAF3" cy:nodeId="107351">
    <graphics y="240.343501635851" z="0.0" x="1105.727198628279"/>
  </node>
  <node id="140727" label="UAP1" cy:nodeId="105820">
    <graphics y="-1016.8357281004771" z="0.0" x="1508.799708393904"/>
  </node>
  <node id="140862" label="SLC35E1" cy:nodeId="106844">
    <graphics y="51.40874821788225" z="0.0" x="220.9961958206618"/>
  </node>
  <node id="140863" label="BRD4" cy:nodeId="106843">
    <graphics y="153.84627873546037" z="0.0" x="80.17495253452898"/>
  </node>
  <node id="140801" label="ELF1" cy:nodeId="105822">
    <graphics y="-778.8013653075084" z="0.0" x="-1159.4469957076585"/>
  </node>
  <node id="140896" label="LFNG" cy:nodeId="106846">
    <graphics y="-305.9236797606334" z="0.0" x="-1521.819432231096"/>
  </node>
  <node id="140802" label="EHMT2" cy:nodeId="105821">
    <graphics y="-1200.4170879637584" z="0.0" x="-124.22894761195539"/>
  </node>
  <node id="140857" label="CBFA2T3" cy:nodeId="106845">
    <graphics y="718.6823383057729" z="0.0" x="304.82787611851336"/>
  </node>
  <node id="140790" label="COG6" cy:nodeId="105824">
    <graphics y="-1151.4064678465709" z="0.0" x="-1504.499608012346"/>
  </node>
  <node id="140849" label="CDK12" cy:nodeId="106848">
    <graphics y="-184.9384464537486" z="0.0" x="178.4063177383864"/>
  </node>
  <node id="140800" label="COG3" cy:nodeId="105823">
    <graphics y="-662.1013836180553" z="0.0" x="-1192.083104106096"/>
  </node>
  <node id="140819" label="DCP1A" cy:nodeId="106850">
    <graphics y="-316.8482708250865" z="0.0" x="719.9433241165602"/>
  </node>
  <node id="140829" label="CLOCK" cy:nodeId="106849">
    <graphics y="83.77956730967912" z="0.0" x="1000.8457289017165"/>
  </node>
  <node id="140741" label="XYLT1" cy:nodeId="106854">
    <graphics y="604.8203387940541" z="0.0" x="216.95128157505633"/>
  </node>
  <node id="140796" label="ERCC6" cy:nodeId="105830">
    <graphics y="19.575175830186936" z="0.0" x="522.9792738235915"/>
  </node>
  <node id="140785" label="MAN1C1" cy:nodeId="106853">
    <graphics y="986.9001117432729" z="0.0" x="725.3694715774977"/>
  </node>
  <node id="140797" label="EP400" cy:nodeId="105829">
    <graphics y="312.7489886963979" z="0.0" x="991.0165663040602"/>
  </node>
  <node id="140757" label="ST6GAL1" cy:nodeId="106855">
    <graphics y="-225.22366850727644" z="0.0" x="-756.7612046920335"/>
  </node>
  <node id="140873" label="ST8SIA4" cy:nodeId="105834">
    <graphics y="601.3778339112416" z="0.0" x="864.5640516556227"/>
  </node>
  <node id="140709" label="CHSY3" cy:nodeId="105833">
    <graphics y="1076.6346088135854" z="0.0" x="423.98043349156023"/>
  </node>
  <node id="140786" label="ST3GAL5" cy:nodeId="106857">
    <graphics y="546.6449847901479" z="0.0" x="591.223780659529"/>
  </node>
  <node id="140717" label="GALNT7" cy:nodeId="106859">
    <graphics y="-858.3577617918834" z="0.0" x="1130.534571675154"/>
  </node>
  <node id="140886" label="CHST2" cy:nodeId="105838">
    <graphics y="275.77410466319475" z="0.0" x="764.8948622024977"/>
  </node>
  <node id="140747" label="CHST15" cy:nodeId="106861">
    <graphics y="744.5589252198354" z="0.0" x="511.282130268904"/>
  </node>
  <node id="140777" label="GPI" cy:nodeId="106864">
    <graphics y="2104.6964832032336" z="0.0" x="-1960.439076396135"/>
  </node>
  <node id="140787" label="ST8SIA1" cy:nodeId="105840">
    <graphics y="857.3561664307729" z="0.0" x="771.2373914993727"/>
  </node>
  <node id="140778" label="GAPDH" cy:nodeId="106863">
    <graphics y="2095.3989062989367" z="0.0" x="-2060.0059022628343"/>
  </node>
  <node id="140856" label="HS3ST3B1" cy:nodeId="105841">
    <graphics y="638.5592914307729" z="0.0" x="551.0149183548415"/>
  </node>
  <node id="140816" label="MGAT2" cy:nodeId="106868">
    <graphics y="-1599.3310894286021" z="0.0" x="1958.666895893904"/>
  </node>
  <node id="140670" label="ARSB" cy:nodeId="105843">
    <graphics y="1175.6338763917104" z="0.0" x="1032.7774305618727"/>
  </node>
  <node id="140638" label="SLC35B4" cy:nodeId="105845">
    <graphics y="-480.0396312987193" z="0.0" x="-446.692723246721"/>
  </node>
  <node id="140751" label="IRF3" cy:nodeId="106872">
    <graphics y="1647.3371844971791" z="0.0" x="-1166.6885232650316"/>
  </node>
  <node id="140794" label="FOXA1" cy:nodeId="105850">
    <graphics y="-1185.7547954832896" z="0.0" x="1767.5290785110915"/>
  </node>
  <node id="140702" label="PIGH" cy:nodeId="105852">
    <graphics y="-1545.1494488036021" z="0.0" x="2100.2029066360915"/>
  </node>
  <node id="140710" label="LEF1" cy:nodeId="106875">
    <graphics y="984.2637592042104" z="0.0" x="608.5366773880446"/>
  </node>
  <node id="140820" label="GLCE" cy:nodeId="105851">
    <graphics y="298.6153827393666" z="0.0" x="-365.3844957076585"/>
  </node>
  <node id="140694" label="MEIS3" cy:nodeId="106878">
    <graphics y="1106.7560687745229" z="0.0" x="921.1006117142165"/>
  </node>
  <node id="140901" label="RPN2" cy:nodeId="105854">
    <graphics y="-641.2547039305553" z="0.0" x="-780.5925645553148"/>
  </node>
  <node id="140791" label="FOXO1" cy:nodeId="105856">
    <graphics y="-1343.8614849364146" z="0.0" x="-1657.3444566451585"/>
  </node>
  <node id="140602" label="ALG6" cy:nodeId="106879">
    <graphics y="-492.975346020399" z="0.0" x="292.6011305130446"/>
  </node>
  <node id="140793" label="GNPNAT1" cy:nodeId="105855">
    <graphics y="-1291.6783794676646" z="0.0" x="1725.515284565779"/>
  </node>
  <node id="140788" label="FOXP3" cy:nodeId="105858">
    <graphics y="686.8970599854604" z="0.0" x="696.3385877884352"/>
  </node>
  <node id="140783" label="DSEL" cy:nodeId="105857">
    <graphics y="954.6817279542104" z="0.0" x="662.7766371048415"/>
  </node>
  <node id="140625" label="NPL" cy:nodeId="105860">
    <graphics y="833.9662738526479" z="0.0" x="1139.7866468704665"/>
  </node>
  <node id="140774" label="SULF1" cy:nodeId="106883">
    <graphics y="914.7920795167104" z="0.0" x="542.2273206985915"/>
  </node>
  <node id="140875" label="HK3" cy:nodeId="105859">
    <graphics y="634.1852679932729" z="0.0" x="813.3039198196852"/>
  </node>
  <node id="140780" label="GABPA" cy:nodeId="105861">
    <graphics y="-1336.7980083739146" z="0.0" x="-2145.6537828170335"/>
  </node>
  <node id="140619" label="ALG13" cy:nodeId="105864">
    <graphics y="-521.0360760008678" z="0.0" x="78.36019041905047"/>
  </node>
  <node id="140683" label="EXTL1" cy:nodeId="106887">
    <graphics y="1250.5622211182729" z="0.0" x="375.27794936070086"/>
  </node>
  <node id="140776" label="GATAD1" cy:nodeId="105863">
    <graphics y="-587.555424145399" z="0.0" x="-605.0947007857835"/>
  </node>
  <node id="140605" label="THAP11" cy:nodeId="106890">
    <graphics y="-898.7043194090709" z="0.0" x="39.5612592972243"/>
  </node>
  <node id="140772" label="GTF2B" cy:nodeId="105868">
    <graphics y="1639.2273669922963" z="0.0" x="-1830.078782054094"/>
  </node>
  <node id="140810" label="COG4" cy:nodeId="106892">
    <graphics y="-1046.0063823973521" z="0.0" x="-175.92776963343977"/>
  </node>
  <node id="140764" label="COG8" cy:nodeId="106891">
    <graphics y="-618.6805462157115" z="0.0" x="175.50594618687273"/>
  </node>
  <node id="140770" label="CTBS" cy:nodeId="105869">
    <graphics y="1579.8416019166127" z="0.0" x="-1939.7297067367113"/>
  </node>
  <node id="140806" label="STT3A" cy:nodeId="106893">
    <graphics y="1770.6639972413197" z="0.0" x="-2189.223174067644"/>
  </node>
  <node id="140766" label="H2AFX" cy:nodeId="105872">
    <graphics y="31.802760669054123" z="0.0" x="-1058.0807847701585"/>
  </node>
  <node id="140767" label="GTF2I" cy:nodeId="105871">
    <graphics y="-764.9074444090709" z="0.0" x="-1488.369725199846"/>
  </node>
  <node id="140735" label="PIGO" cy:nodeId="105874">
    <graphics y="-30.473530224500564" z="0.0" x="-1850.6650132857835"/>
  </node>
  <node id="140765" label="HCFC1" cy:nodeId="105873">
    <graphics y="-159.88119166248885" z="0.0" x="270.36178114781023"/>
  </node>
  <node id="140803" label="DPAGT1" cy:nodeId="105878">
    <graphics y="1995.398906298937" z="0.0" x="-2219.444881411699"/>
  </node>
  <node id="140755" label="HSF1" cy:nodeId="105879">
    <graphics y="219.39007146006975" z="0.0" x="-1627.891697856096"/>
  </node>
  <node id="140888" label="LIPA" cy:nodeId="105884">
    <graphics y="522.5992694581166" z="0.0" x="677.5451307571852"/>
  </node>
  <node id="140626" label="GM2A" cy:nodeId="105883">
    <graphics y="908.0133929932729" z="0.0" x="1074.0705824173415"/>
  </node>
  <node id="140754" label="INO80" cy:nodeId="105885">
    <graphics y="642.6031757081166" z="0.0" x="1194.4265394485915"/>
  </node>
  <node id="140749" label="IRF4" cy:nodeId="105888">
    <graphics y="490.2372699463979" z="0.0" x="747.3787489212477"/>
  </node>
  <node id="140752" label="IRF1" cy:nodeId="105887">
    <graphics y="519.9607196534291" z="0.0" x="924.9301405228102"/>
  </node>
  <node id="140743" label="JMJD1C" cy:nodeId="105892">
    <graphics y="283.3855853760854" z="0.0" x="296.02169325718523"/>
  </node>
  <node id="140740" label="JMJD6" cy:nodeId="105894">
    <graphics y="1543.8855853760854" z="0.0" x="-1508.8413858138597"/>
  </node>
  <node id="140889" label="MGAT5" cy:nodeId="105893">
    <graphics y="395.9474750245229" z="0.0" x="195.79594710240008"/>
  </node>
  <node id="140681" label="FKRP" cy:nodeId="105896">
    <graphics y="1624.4632526124135" z="0.0" x="-1337.7660989486253"/>
  </node>
  <node id="140734" label="KDM5A" cy:nodeId="105904">
    <graphics y="-211.09279864185896" z="0.0" x="387.12349989781023"/>
  </node>
  <node id="140733" label="GNS" cy:nodeId="105905">
    <graphics y="-76.25297968739119" z="0.0" x="662.9182386673415"/>
  </node>
  <node id="140732" label="KDM5B" cy:nodeId="105907">
    <graphics y="-1571.9722027098521" z="0.0" x="992.1106214798415"/>
  </node>
  <node id="140700" label="MAZ" cy:nodeId="105916">
    <graphics y="-1074.9319805418834" z="0.0" x="-471.59048936000227"/>
  </node>
  <node id="140703" label="MAX" cy:nodeId="105915">
    <graphics y="-1654.6208843504771" z="0.0" x="2138.807032612654"/>
  </node>
  <node id="140758" label="MGAT4B" cy:nodeId="105918">
    <graphics y="-738.6985210692271" z="0.0" x="-769.8888292037523"/>
  </node>
  <node id="140722" label="ST6GALNAC1" cy:nodeId="105920">
    <graphics y="-1254.9446758543834" z="0.0" x="1213.005030659529"/>
  </node>
  <node id="140742" label="IDS" cy:nodeId="105922">
    <graphics y="-224.22546522968855" z="0.0" x="-65.08966538539289"/>
  </node>
  <node id="140902" label="ARID3A" cy:nodeId="107970">
    <graphics y="-444.8792309080943" z="0.0" x="-693.495701762346"/>
  </node>
  <node id="140696" label="MED1" cy:nodeId="105924">
    <graphics y="-608.5889934813365" z="0.0" x="491.209132222029"/>
  </node>
  <node id="140885" label="ATF7" cy:nodeId="107972">
    <graphics y="419.8167987549916" z="0.0" x="347.43078139195086"/>
  </node>
  <node id="140884" label="NDST1" cy:nodeId="105923">
    <graphics y="388.5180927003041" z="0.0" x="489.75988295445086"/>
  </node>
  <node id="140895" label="NEU1" cy:nodeId="107971">
    <graphics y="-356.6285976683482" z="0.0" x="-1055.6879625045335"/>
  </node>
  <node id="140881" label="GALNT11" cy:nodeId="107974">
    <graphics y="1553.1831622803822" z="0.0" x="-491.5676049911058"/>
  </node>
  <node id="140882" label="AUTS2" cy:nodeId="107973">
    <graphics y="1543.8855853760854" z="0.0" x="-591.134430857805"/>
  </node>
  <node id="140877" label="FUT8" cy:nodeId="107976">
    <graphics y="-1066.2325176512584" z="0.0" x="1686.0354261673415"/>
  </node>
  <node id="140707" label="SLC35F1" cy:nodeId="105927">
    <graphics y="1114.8571429932729" z="0.0" x="512.4052381790602"/>
  </node>
  <node id="140878" label="BARX2" cy:nodeId="107975">
    <graphics y="-1054.2740215575084" z="0.0" x="1850.127833393904"/>
  </node>
  <node id="140860" label="C17orf96" cy:nodeId="107978">
    <graphics y="-1328.1496929442271" z="0.0" x="-672.7059678756273"/>
  </node>
  <node id="140861" label="BRD7" cy:nodeId="107977">
    <graphics y="-876.5906109129771" z="0.0" x="-784.1012925826585"/>
  </node>
  <node id="140852" label="PIGX" cy:nodeId="107980">
    <graphics y="-1214.1264385496959" z="0.0" x="-1123.3610582076585"/>
  </node>
  <node id="140693" label="MRE11A" cy:nodeId="105931">
    <graphics y="-396.0901836668834" z="0.0" x="-362.5835618697679"/>
  </node>
  <node id="140858" label="SLC35F2" cy:nodeId="107979">
    <graphics y="-1496.4166607176646" z="0.0" x="-717.7297715865648"/>
  </node>
  <node id="140842" label="CDX2" cy:nodeId="107982">
    <graphics y="-347.57531397694197" z="0.0" x="-897.5663194381273"/>
  </node>
  <node id="140692" label="MXD3" cy:nodeId="105933">
    <graphics y="-693.7609295164928" z="0.0" x="-52.57611558070539"/>
  </node>
  <node id="140843" label="LAMP1" cy:nodeId="107981">
    <graphics y="-665.7352031981334" z="0.0" x="-1006.226902934221"/>
  </node>
  <node id="140837" label="CTSA" cy:nodeId="107984">
    <graphics y="-497.13983576649275" z="0.0" x="-1030.4111070357835"/>
  </node>
  <node id="140691" label="MYBL2" cy:nodeId="105935">
    <graphics y="-754.9209942137584" z="0.0" x="-677.786473246721"/>
  </node>
  <node id="140839" label="B3GNT8" cy:nodeId="107983">
    <graphics y="-328.1870846068248" z="0.0" x="-1160.647068949846"/>
  </node>
  <node id="140812" label="SLC35C2" cy:nodeId="107986">
    <graphics y="-578.1094402586803" z="0.0" x="-720.3752793990648"/>
  </node>
  <node id="140689" label="MYH11" cy:nodeId="105937">
    <graphics y="945.3791156495229" z="0.0" x="450.36788466343523"/>
  </node>
  <node id="140817" label="DICER1" cy:nodeId="107985">
    <graphics y="-1740.4562114989146" z="0.0" x="1983.129542378279"/>
  </node>
  <node id="140792" label="FOXD2" cy:nodeId="107988">
    <graphics y="-466.9308666502818" z="0.0" x="-1231.4216050826585"/>
  </node>
  <node id="140811" label="E2F4" cy:nodeId="107987">
    <graphics y="-923.7501568114146" z="0.0" x="-478.682469340471"/>
  </node>
  <node id="140682" label="MZF1" cy:nodeId="105942">
    <graphics y="1543.8855853760854" z="0.0" x="-1266.6885232650316"/>
  </node>
  <node id="140781" label="B4GALNT1" cy:nodeId="107990">
    <graphics y="882.2613177979604" z="0.0" x="298.43273451695086"/>
  </node>
  <node id="140784" label="ST6GALNAC5" cy:nodeId="107989">
    <graphics y="819.1344867432729" z="0.0" x="601.6613722122634"/>
  </node>
  <node id="140771" label="ALG14" cy:nodeId="107992">
    <graphics y="1543.8855853760854" z="0.0" x="-1751.3745889388597"/>
  </node>
  <node id="140775" label="GLI1" cy:nodeId="107991">
    <graphics y="886.4836078370229" z="0.0" x="391.26681044468523"/>
  </node>
  <node id="140760" label="HNF1B" cy:nodeId="107994">
    <graphics y="27.95806462413225" z="0.0" x="-872.5571641646898"/>
  </node>
  <node id="140761" label="HEYL" cy:nodeId="107993">
    <graphics y="964.3094135010854" z="0.0" x="80.126799610945"/>
  </node>
  <node id="140674" label="NPAT" cy:nodeId="105948">
    <graphics y="-490.3272747313365" z="0.0" x="495.01168349156023"/>
  </node>
  <node id="140756" label="HS6ST1" cy:nodeId="107996">
    <graphics y="-424.66473811024275" z="0.0" x="-862.3376817428148"/>
  </node>
  <node id="140676" label="NIPBL" cy:nodeId="105947">
    <graphics y="539.5844379151479" z="0.0" x="86.95532896885516"/>
  </node>
  <node id="140759" label="HNF4A" cy:nodeId="107995">
    <graphics y="-465.5440258299693" z="0.0" x="-783.5088243209398"/>
  </node>
  <node id="140731" label="ST3GAL4" cy:nodeId="107998">
    <graphics y="-1430.8049663817271" z="0.0" x="1057.0036268509352"/>
  </node>
  <node id="140673" label="NR2C2" cy:nodeId="105949">
    <graphics y="-53.07196467274275" z="0.0" x="316.9628706253493"/>
  </node>
  <node id="140737" label="KDM4C" cy:nodeId="107997">
    <graphics y="-54.01242487782088" z="0.0" x="-1707.451268168596"/>
  </node>
  <node id="140719" label="GALNT3" cy:nodeId="108000">
    <graphics y="-1039.0070537840709" z="0.0" x="1138.363429097029"/>
  </node>
  <node id="140723" label="B3GNT6" cy:nodeId="107999">
    <graphics y="-1297.6614116942271" z="0.0" x="1099.0160780228102"/>
  </node>
  <node id="140677" label="PIGM" cy:nodeId="105954">
    <graphics y="-256.3950714384898" z="0.0" x="1649.2602796829665"/>
  </node>
  <node id="140715" label="NANS" cy:nodeId="108002">
    <graphics y="-962.8252300536021" z="0.0" x="574.7858228958571"/>
  </node>
  <node id="140718" label="SLC35A1" cy:nodeId="108001">
    <graphics y="-1059.6790508543834" z="0.0" x="1292.964991597029"/>
  </node>
  <node id="140667" label="PHF20" cy:nodeId="105956">
    <graphics y="-353.42721217030135" z="0.0" x="-649.6562242232835"/>
  </node>
  <node id="140713" label="B3GNT7" cy:nodeId="108004">
    <graphics y="-1186.3714947020396" z="0.0" x="1090.4287977493727"/>
  </node>
  <node id="140714" label="GCNT3" cy:nodeId="108003">
    <graphics y="-1357.9087261473521" z="0.0" x="1505.071925190779"/>
  </node>
  <node id="140662" label="PIAS1" cy:nodeId="105958">
    <graphics y="348.0500140870229" z="0.0" x="829.0395765579665"/>
  </node>
  <node id="140706" label="MAFK" cy:nodeId="108006">
    <graphics y="1595.6529193604604" z="0.0" x="-785.0984811507738"/>
  </node>
  <node id="140712" label="SLC17A5" cy:nodeId="108005">
    <graphics y="-1298.2574810301646" z="0.0" x="1333.234034565779"/>
  </node>
  <node id="140659" label="POLR3A" cy:nodeId="105960">
    <graphics y="90.2139850342885" z="0.0" x="313.88325026402117"/>
  </node>
  <node id="140701" label="DAD1" cy:nodeId="108008">
    <graphics y="-1733.6167339598521" z="0.0" x="2256.9844007767165"/>
  </node>
  <node id="140660" label="POLR2B" cy:nodeId="105959">
    <graphics y="-313.70573084705916" z="0.0" x="550.930567768904"/>
  </node>
  <node id="140704" label="CHPF2" cy:nodeId="108007">
    <graphics y="1543.8855853760854" z="0.0" x="-691.134430857805"/>
  </node>
  <node id="140658" label="PRDM1" cy:nodeId="105962">
    <graphics y="589.1161151612416" z="0.0" x="731.528224018904"/>
  </node>
  <node id="140688" label="CHST1" cy:nodeId="108010">
    <graphics y="1225.6924701417104" z="0.0" x="260.0925550735915"/>
  </node>
  <node id="140690" label="MYC" cy:nodeId="108009">
    <graphics y="-993.2662700926646" z="0.0" x="-588.319676371721"/>
  </node>
  <node id="140686" label="ST8SIA3" cy:nodeId="108012">
    <graphics y="1008.6108051026479" z="0.0" x="235.22406294712664"/>
  </node>
  <node id="140687" label="CHST8" cy:nodeId="108011">
    <graphics y="1110.3844867432729" z="0.0" x="309.6854810989821"/>
  </node>
  <node id="140684" label="MGAT5B" cy:nodeId="108014">
    <graphics y="1215.3158832276479" z="0.0" x="508.12353041538836"/>
  </node>
  <node id="140845" label="UGGT2" cy:nodeId="105966">
    <graphics y="-802.6333965575084" z="0.0" x="-881.173680277971"/>
  </node>
  <node id="140655" label="RB1" cy:nodeId="105965">
    <graphics y="-868.1054424559459" z="0.0" x="-1192.7756089889085"/>
  </node>
  <node id="140685" label="CHST10" cy:nodeId="108013">
    <graphics y="1120.7536273682729" z="0.0" x="185.76684096226336"/>
  </node>
</graph>
