# Supplementary material for: A systems-based framework to computationally describe putative transcription factors and signaling pathways regulating glycan biosynthesis
Source: publisher site journal article supplement (doi:10.3762/bjoc.17.119), 2021-07-22
Supplement: Additional file 2 [file 1860-5397-17-119-S2.cys › CytoscapeSession-2021_03_21-12_01/views/108538-157620-GBM.xgmml]

<?xml version="1.0" encoding="UTF-8" standalone="yes"?>
<graph id="157620" label="GBM" cy:view="1" cy:networkId="108538" cy:visualStyle="default" cy:rendererId="org.cytoscape.ding" cy:documentVersion="3.0" xmlns:dc="http://purl.org/dc/elements/1.1/" xmlns:xlink="http://www.w3.org/1999/xlink" xmlns:rdf="http://www.w3.org/1999/02/22-rdf-syntax-ns#" xmlns:cy="http://www.cytoscape.org" xmlns="http://www.cs.rpi.edu/XGMML">
  <graphics>
    <att name="NETWORK_NODE_SELECTION" value="true" type="string" cy:type="String"/>
    <att name="NETWORK_CENTER_X_LOCATION" value="-294.42474365234375" type="string" cy:type="String"/>
    <att name="NETWORK_HEIGHT" value="510.0" type="string" cy:type="String"/>
    <att name="NETWORK_TITLE" value="GBM" type="string" cy:type="String"/>
    <att name="NETWORK_EDGE_SELECTION" value="true" type="string" cy:type="String"/>
    <att name="NETWORK_CENTER_Y_LOCATION" value="-40.0594482421875" type="string" cy:type="String"/>
    <att name="NETWORK_WIDTH" value="1312.0" type="string" cy:type="String"/>
    <att name="NETWORK_DEPTH" value="0.0" type="string" cy:type="String"/>
    <att name="NETWORK_SCALE_FACTOR" value="0.1882968959969978" type="string" cy:type="String"/>
    <att name="NETWORK_ANNOTATION_SELECTION" value="false" type="string" cy:type="String"/>
    <att name="NETWORK_CENTER_Z_LOCATION" value="0.0" type="string" cy:type="String"/>
  </graphics>
  <node id="158017" label="ARNT2" cy:nodeId="108548">
    <graphics y="697.4567184261609" z="0.0" x="504.5242438248647"/>
  </node>
  <node id="157999" label="ATF4" cy:nodeId="108550">
    <graphics y="1269.5999984554578" z="0.0" x="-1464.586992747401"/>
  </node>
  <node id="158015" label="ASCL1" cy:nodeId="108549">
    <graphics y="497.3788986019422" z="0.0" x="1126.6894049576772"/>
  </node>
  <node id="157985" label="GCNT1" cy:nodeId="108552">
    <graphics y="40.03360746424687" z="0.0" x="-1192.2819085188853"/>
  </node>
  <node id="157986" label="UGDH" cy:nodeId="108551">
    <graphics y="-213.35115816075313" z="0.0" x="210.44701909341939"/>
  </node>
  <node id="157965" label="ALG9" cy:nodeId="108554">
    <graphics y="-175.63876726109493" z="0.0" x="483.3115057877553"/>
  </node>
  <node id="157980" label="BACH2" cy:nodeId="108553">
    <graphics y="254.7208480648328" z="0.0" x="625.3852057389272"/>
  </node>
  <node id="157946" label="PMM2" cy:nodeId="108556">
    <graphics y="-481.3501053043078" z="0.0" x="459.5346198014272"/>
  </node>
  <node id="157947" label="DDOST" cy:nodeId="108555">
    <graphics y="-753.0123367496203" z="0.0" x="445.83924626627095"/>
  </node>
  <node id="157939" label="PIGC" cy:nodeId="108558">
    <graphics y="-824.9418411441516" z="0.0" x="677.7734503678334"/>
  </node>
  <node id="157941" label="PIGF" cy:nodeId="108557">
    <graphics y="-802.2105179019641" z="0.0" x="554.7180609635366"/>
  </node>
  <node id="157929" label="GAA" cy:nodeId="108560">
    <graphics y="-124.15604402501094" z="0.0" x="-1824.6074700423228"/>
  </node>
  <node id="157935" label="GALE" cy:nodeId="108559">
    <graphics y="-540.3565445132922" z="0.0" x="987.803113453771"/>
  </node>
  <node id="157921" label="CCNT2" cy:nodeId="108562">
    <graphics y="-500.18802644688594" z="0.0" x="120.5463385514272"/>
  </node>
  <node id="157928" label="GALNT6" cy:nodeId="108561">
    <graphics y="-213.8321953006457" z="0.0" x="-1645.8799309798228"/>
  </node>
  <node id="157906" label="CEBPZ" cy:nodeId="108564">
    <graphics y="110.35228727381718" z="0.0" x="302.31332158365376"/>
  </node>
  <node id="157907" label="CEBPD" cy:nodeId="108563">
    <graphics y="-191.56776471812236" z="0.0" x="-2036.3369622298228"/>
  </node>
  <node id="157899" label="B3GNT4" cy:nodeId="108566">
    <graphics y="1269.5999984554578" z="0.0" x="-666.319689280604"/>
  </node>
  <node id="157900" label="CHD5" cy:nodeId="108565">
    <graphics y="1260.302421551161" z="0.0" x="-765.8865151473033"/>
  </node>
  <node id="157889" label="CSNK2A1" cy:nodeId="108568">
    <graphics y="-220.90361978489864" z="0.0" x="71.96783422746785"/>
  </node>
  <node id="157894" label="NAGA" cy:nodeId="108567">
    <graphics y="-249.81779863316524" z="0.0" x="-1388.2102532454478"/>
  </node>
  <node id="157878" label="DOT1L" cy:nodeId="108570">
    <graphics y="646.8231735042859" z="0.0" x="844.2297491959584"/>
  </node>
  <node id="157885" label="DAXX" cy:nodeId="108569">
    <graphics y="-937.1198806949328" z="0.0" x="420.4100165299428"/>
  </node>
  <node id="157874" label="SLC35B2" cy:nodeId="108572">
    <graphics y="-358.9881363101672" z="0.0" x="671.3183722428334"/>
  </node>
  <node id="157877" label="DR1" cy:nodeId="108571">
    <graphics y="-1349.718818683214" z="0.0" x="843.2023444108022"/>
  </node>
  <node id="157867" label="GUSB" cy:nodeId="108574">
    <graphics y="-744.5111770816516" z="0.0" x="303.1613745621694"/>
  </node>
  <node id="157873" label="E2F2" cy:nodeId="108573">
    <graphics y="-445.45600130040157" z="0.0" x="600.514539235021"/>
  </node>
  <node id="157865" label="EBNA1BP2" cy:nodeId="108576">
    <graphics y="-895.2705764957141" z="0.0" x="561.0807623795522"/>
  </node>
  <node id="157866" label="E2F8" cy:nodeId="108575">
    <graphics y="-135.9915428348254" z="0.0" x="552.581433766271"/>
  </node>
  <node id="157858" label="PIGL" cy:nodeId="108578">
    <graphics y="98.87526701014531" z="0.0" x="507.2217841080678"/>
  </node>
  <node id="157861" label="EPAS1" cy:nodeId="108577">
    <graphics y="354.71465299647343" z="0.0" x="-890.2900261946666"/>
  </node>
  <node id="157846" label="EXT1" cy:nodeId="108580">
    <graphics y="-479.06998445469844" z="0.0" x="-225.50190973958843"/>
  </node>
  <node id="157854" label="ST3GAL1" cy:nodeId="108579">
    <graphics y="-359.1463394351672" z="0.0" x="-1231.9973626204478"/>
  </node>
  <node id="157839" label="EZH2" cy:nodeId="108582">
    <graphics y="-296.0315170474719" z="0.0" x="626.3812994889272"/>
  </node>
  <node id="157842" label="ETV4" cy:nodeId="108581">
    <graphics y="1269.5999984554578" z="0.0" x="-865.8865151473033"/>
  </node>
  <node id="157828" label="UGP2" cy:nodeId="108584">
    <graphics y="-945.9010086246203" z="0.0" x="-446.2765374251353"/>
  </node>
  <node id="157830" label="CHPF" cy:nodeId="108583">
    <graphics y="-856.6315384097766" z="0.0" x="-523.9850335188853"/>
  </node>
  <node id="157823" label="SLC35A4" cy:nodeId="108586">
    <graphics y="-507.3758621402453" z="0.0" x="543.1919073990834"/>
  </node>
  <node id="157827" label="HEXB" cy:nodeId="108585">
    <graphics y="-879.6690139957141" z="0.0" x="42.889314167882276"/>
  </node>
  <node id="157813" label="SLC35C1" cy:nodeId="108588">
    <graphics y="971.9536666683484" z="0.0" x="-1418.2401604720103"/>
  </node>
  <node id="157822" label="FOXO3" cy:nodeId="108587">
    <graphics y="582.8349532894422" z="0.0" x="135.37949895181782"/>
  </node>
  <node id="157799" label="GAL3ST3" cy:nodeId="108590">
    <graphics y="-378.1785202213" z="0.0" x="1119.5811285904897"/>
  </node>
  <node id="157810" label="GMEB2" cy:nodeId="108589">
    <graphics y="-1.6888656802843798" z="0.0" x="568.6962714127553"/>
  </node>
  <node id="157796" label="HDAC2" cy:nodeId="108592">
    <graphics y="-233.51266481358516" z="0.0" x="549.6010565690053"/>
  </node>
  <node id="157798" label="HBP1" cy:nodeId="108591">
    <graphics y="-1292.2838821597766" z="0.0" x="513.1872992447866"/>
  </node>
  <node id="157789" label="SULT1A3" cy:nodeId="108594">
    <graphics y="1160.302421551161" z="0.0" x="73.7652470997823"/>
  </node>
  <node id="157790" label="HDAC6" cy:nodeId="108593">
    <graphics y="860.6285934261609" z="0.0" x="125.43462514200337"/>
  </node>
  <node id="157785" label="HOXA1" cy:nodeId="108596">
    <graphics y="-1033.7218704410266" z="0.0" x="191.03723668375142"/>
  </node>
  <node id="157786" label="HIRA" cy:nodeId="108595">
    <graphics y="618.1478805355359" z="0.0" x="465.67799138345845"/>
  </node>
  <node id="157754" label="MAFF" cy:nodeId="108598">
    <graphics y="-715.1740188785266" z="0.0" x="-667.0122551985728"/>
  </node>
  <node id="157764" label="KLF15" cy:nodeId="108597">
    <graphics y="1013.3392867855359" z="0.0" x="1574.0047125748647"/>
  </node>
  <node id="157745" label="STS" cy:nodeId="108600">
    <graphics y="183.21920011561406" z="0.0" x="-1084.4611077376353"/>
  </node>
  <node id="157749" label="MBD4" cy:nodeId="108599">
    <graphics y="246.05162809412968" z="0.0" x="-1274.6869378157603"/>
  </node>
  <node id="157732" label="NCAPG" cy:nodeId="108602">
    <graphics y="-403.26493074376094" z="0.0" x="476.7585883072866"/>
  </node>
  <node id="157738" label="MLLT1" cy:nodeId="108601">
    <graphics y="697.3325118831922" z="0.0" x="-181.3241448470103"/>
  </node>
  <node id="157729" label="NEUROD2" cy:nodeId="108604">
    <graphics y="1260.302421551161" z="0.0" x="-1763.7206444807994"/>
  </node>
  <node id="157731" label="NCOR1" cy:nodeId="108603">
    <graphics y="976.0223922542859" z="0.0" x="199.14079045572407"/>
  </node>
  <node id="157721" label="B3GAT2" cy:nodeId="108606">
    <graphics y="1260.302421551161" z="0.0" x="-1165.0201668807017"/>
  </node>
  <node id="157728" label="GALNT9" cy:nodeId="108605">
    <graphics y="1269.5999984554578" z="0.0" x="-1664.1538186141001"/>
  </node>
  <node id="157715" label="PCGF2" cy:nodeId="108608">
    <graphics y="-496.8952713199328" z="0.0" x="1395.5802740983022"/>
  </node>
  <node id="157719" label="PAX6" cy:nodeId="108607">
    <graphics y="786.0888595394422" z="0.0" x="642.3462653092397"/>
  </node>
  <node id="157703" label="RBCK1" cy:nodeId="108610">
    <graphics y="76.71373746912968" z="0.0" x="1186.6944098404897"/>
  </node>
  <node id="157712" label="POLR3D" cy:nodeId="108609">
    <graphics y="-288.61737825352657" z="0.0" x="453.3345160416616"/>
  </node>
  <node id="157695" label="CHST5" cy:nodeId="108612">
    <graphics y="824.1263351253797" z="0.0" x="1313.1281256608022"/>
  </node>
  <node id="157696" label="RFX2" cy:nodeId="108611">
    <graphics y="693.9310836605359" z="0.0" x="1191.3712897233022"/>
  </node>
  <node id="157686" label="SATB1" cy:nodeId="108614">
    <graphics y="-296.2322998233508" z="0.0" x="-485.42222834310405"/>
  </node>
  <node id="157691" label="RING1" cy:nodeId="108613">
    <graphics y="-253.66695024449336" z="0.0" x="1444.3637213639272"/>
  </node>
  <node id="157682" label="SFPQ" cy:nodeId="108616">
    <graphics y="-344.90999605137813" z="0.0" x="277.507962696935"/>
  </node>
  <node id="157683" label="SFMBT1" cy:nodeId="108615">
    <graphics y="46.777412395887495" z="0.0" x="-185.53895807943218"/>
  </node>
  <node id="157671" label="SNAPC1" cy:nodeId="108618">
    <graphics y="-954.0142898746203" z="0.0" x="-260.2943291731822"/>
  </node>
  <node id="157673" label="SMARCB1" cy:nodeId="108617">
    <graphics y="-463.9167556949328" z="0.0" x="933.9619269303334"/>
  </node>
  <node id="157664" label="SOX4" cy:nodeId="108620">
    <graphics y="90.74706266444218" z="0.0" x="884.401746266271"/>
  </node>
  <node id="157667" label="SOX11" cy:nodeId="108619">
    <graphics y="-151.13965990025508" z="0.0" x="967.4820074967397"/>
  </node>
  <node id="157656" label="SUPT5H" cy:nodeId="108622">
    <graphics y="284.9403304867078" z="0.0" x="1017.6347174576772"/>
  </node>
  <node id="157663" label="SOX9" cy:nodeId="108621">
    <graphics y="465.9667892269422" z="0.0" x="529.6538214615834"/>
  </node>
  <node id="157653" label="TAL1" cy:nodeId="108624">
    <graphics y="-394.3668441959094" z="0.0" x="-1744.5516839095103"/>
  </node>
  <node id="157654" label="TAF7" cy:nodeId="108623">
    <graphics y="-849.2877884097766" z="0.0" x="482.1329169205678"/>
  </node>
  <node id="157644" label="THAP1" cy:nodeId="108626">
    <graphics y="-976.4600906558703" z="0.0" x="759.7370734147084"/>
  </node>
  <node id="157645" label="TFE3" cy:nodeId="108625">
    <graphics y="73.66353605311406" z="0.0" x="-1887.7717766829478"/>
  </node>
  <node id="157640" label="TRRAP" cy:nodeId="108628">
    <graphics y="264.80232999842656" z="0.0" x="526.4700751236928"/>
  </node>
  <node id="157642" label="TP53" cy:nodeId="108627">
    <graphics y="-223.80150606114375" z="0.0" x="443.3549017838491"/>
  </node>
  <node id="157631" label="WWTR1" cy:nodeId="108630">
    <graphics y="345.7820968441297" z="0.0" x="-544.7868523665416"/>
  </node>
  <node id="157639" label="UBE2I" cy:nodeId="108629">
    <graphics y="-516.7363662906359" z="0.0" x="686.3130621842397"/>
  </node>
  <node id="158026" label="AFF4" cy:nodeId="105686">
    <graphics y="132.10399625819218" z="0.0" x="-168.64404535970561"/>
  </node>
  <node id="158024" label="STT3B" cy:nodeId="105688">
    <graphics y="12.23667142909062" z="0.0" x="-120.69058466634624"/>
  </node>
  <node id="158025" label="MAN1A2" cy:nodeId="105687">
    <graphics y="215.8055648617078" z="0.0" x="-144.67103815755718"/>
  </node>
  <node id="158022" label="FUT11" cy:nodeId="105690">
    <graphics y="90.72539518397343" z="0.0" x="-254.43260431966655"/>
  </node>
  <node id="158023" label="NEU3" cy:nodeId="105689">
    <graphics y="175.50948331873906" z="0.0" x="-19.99563837728374"/>
  </node>
  <node id="158009" label="COG5" cy:nodeId="105692">
    <graphics y="45.350349407606245" z="0.0" x="57.34794472971089"/>
  </node>
  <node id="158021" label="ACER2" cy:nodeId="105691">
    <graphics y="31.325263958387495" z="0.0" x="-340.2344536849009"/>
  </node>
  <node id="158012" label="MAN2A1" cy:nodeId="105694">
    <graphics y="163.68962858241093" z="0.0" x="-456.21068049154155"/>
  </node>
  <node id="158011" label="SLC35F5" cy:nodeId="105696">
    <graphics y="-237.07315828282344" z="0.0" x="-27.95707178792827"/>
  </node>
  <node id="158007" label="SLC35A3" cy:nodeId="105695">
    <graphics y="-26.93776704747188" z="0.0" x="-60.96516657552593"/>
  </node>
  <node id="157726" label="GALNT10" cy:nodeId="105697">
    <graphics y="283.32024381678593" z="0.0" x="-416.5445122786509"/>
  </node>
  <node id="158016" label="RTF1" cy:nodeId="105700">
    <graphics y="308.8751449398328" z="0.0" x="316.6628699234975"/>
  </node>
  <node id="158013" label="ATF2" cy:nodeId="105704">
    <graphics y="97.50023649256718" z="0.0" x="-23.93082667074077"/>
  </node>
  <node id="157628" label="GALNT4" cy:nodeId="105703">
    <graphics y="611.8351363949109" z="0.0" x="-671.701281077479"/>
  </node>
  <node id="158001" label="ATF3" cy:nodeId="105706">
    <graphics y="1260.302421551161" z="0.0" x="-2162.854296214198"/>
  </node>
  <node id="158020" label="UGGT1" cy:nodeId="105705">
    <graphics y="250.28118131678593" z="0.0" x="75.77268027582295"/>
  </node>
  <node id="157679" label="B3GNT5" cy:nodeId="105707">
    <graphics y="437.8815841488172" z="0.0" x="-609.4870476790416"/>
  </node>
  <node id="157994" label="ATRX" cy:nodeId="105712">
    <graphics y="856.4281539730359" z="0.0" x="-45.526422984217334"/>
  </node>
  <node id="157816" label="ALG10" cy:nodeId="105711">
    <graphics y="102.52419279139531" z="0.0" x="68.40694891729481"/>
  </node>
  <node id="157993" label="BACH1" cy:nodeId="105714">
    <graphics y="-73.11304475743282" z="0.0" x="-587.9440789290416"/>
  </node>
  <node id="158005" label="FKTN" cy:nodeId="105713">
    <graphics y="418.6165695003797" z="0.0" x="51.52735280313618"/>
  </node>
  <node id="157990" label="MAN1A1" cy:nodeId="105716">
    <graphics y="-43.284416217393755" z="0.0" x="-1105.2778801985728"/>
  </node>
  <node id="157992" label="CSGALNACT2" cy:nodeId="105715">
    <graphics y="48.27022550623906" z="0.0" x="-800.7756829329478"/>
  </node>
  <node id="157850" label="CHST11" cy:nodeId="105718">
    <graphics y="372.4669112972547" z="0.0" x="330.25819157877095"/>
  </node>
  <node id="157989" label="CHSY1" cy:nodeId="105717">
    <graphics y="-91.79424287755" z="0.0" x="-444.23118830404155"/>
  </node>
  <node id="157792" label="DPM3" cy:nodeId="105722">
    <graphics y="-670.8092727847766" z="0.0" x="830.1679816178334"/>
  </node>
  <node id="157912" label="MGAT1" cy:nodeId="105724">
    <graphics y="-237.82789613682735" z="0.0" x="-1808.6075921126353"/>
  </node>
  <node id="157976" label="BATF3" cy:nodeId="105723">
    <graphics y="-1279.2789993472766" z="0.0" x="965.4946417740834"/>
  </node>
  <node id="157971" label="BMI1" cy:nodeId="105726">
    <graphics y="1034.157157879286" z="0.0" x="436.97645329752095"/>
  </node>
  <node id="157974" label="BCAT1" cy:nodeId="105725">
    <graphics y="272.6687240413953" z="0.0" x="771.9575934342397"/>
  </node>
  <node id="157969" label="BRCA1" cy:nodeId="105728">
    <graphics y="178.32366178553593" z="0.0" x="216.87560796060689"/>
  </node>
  <node id="157967" label="ALG10B" cy:nodeId="105727">
    <graphics y="361.1492843441297" z="0.0" x="-142.39991999349468"/>
  </node>
  <node id="157886" label="PIGN" cy:nodeId="105730">
    <graphics y="-172.73459436375606" z="0.0" x="-100.4945550032603"/>
  </node>
  <node id="157968" label="PIGW" cy:nodeId="105729">
    <graphics y="-151.94811250645625" z="0.0" x="387.78809880533345"/>
  </node>
  <node id="158006" label="FAM20B" cy:nodeId="105731">
    <graphics y="347.84978483241093" z="0.0" x="78.96496152200825"/>
  </node>
  <node id="157957" label="C17orf49" cy:nodeId="105736">
    <graphics y="-687.5631179996203" z="0.0" x="1160.2791266373647"/>
  </node>
  <node id="157998" label="PMM1" cy:nodeId="105735">
    <graphics y="1260.302421551161" z="0.0" x="-1564.1538186141001"/>
  </node>
  <node id="157949" label="CASP8AP2" cy:nodeId="105738">
    <graphics y="664.1644210628797" z="0.0" x="-427.99290705404155"/>
  </node>
  <node id="157734" label="HYAL2" cy:nodeId="105737">
    <graphics y="-642.5916519351672" z="0.0" x="926.841931813146"/>
  </node>
  <node id="157948" label="CBFB" cy:nodeId="105739">
    <graphics y="-820.3337478824328" z="0.0" x="354.08265446939595"/>
  </node>
  <node id="157945" label="CBX3" cy:nodeId="105741">
    <graphics y="-668.0385818668078" z="0.0" x="621.774549000646"/>
  </node>
  <node id="157924" label="RFNG" cy:nodeId="105744">
    <graphics y="-176.90327932316768" z="0.0" x="1119.6125006608022"/>
  </node>
  <node id="157934" label="CBX4" cy:nodeId="105743">
    <graphics y="1260.302421551161" z="0.0" x="-1364.586992747401"/>
  </node>
  <node id="157931" label="CBX7" cy:nodeId="105745">
    <graphics y="-112.79480745274532" z="0.0" x="-1718.6340813704478"/>
  </node>
  <node id="157995" label="MAN2A2" cy:nodeId="105748">
    <graphics y="741.0463790706922" z="0.0" x="167.30831670084126"/>
  </node>
  <node id="157891" label="ST3GAL3" cy:nodeId="105747">
    <graphics y="-441.43790437657344" z="0.0" x="1065.5224738053334"/>
  </node>
  <node id="157933" label="MGAT3" cy:nodeId="105750">
    <graphics y="1269.5999984554578" z="0.0" x="-1265.0201668807017"/>
  </node>
  <node id="157779" label="IDUA" cy:nodeId="105749">
    <graphics y="-84.88978578526485" z="0.0" x="1393.7077155045522"/>
  </node>
  <node id="157925" label="CBX8" cy:nodeId="105752">
    <graphics y="-54.81076814610469" z="0.0" x="918.0529303483022"/>
  </node>
  <node id="157914" label="HYAL1" cy:nodeId="105751">
    <graphics y="46.96695707362187" z="0.0" x="1534.5087408951772"/>
  </node>
  <node id="157956" label="B3GAT3" cy:nodeId="105754">
    <graphics y="-809.9479446597766" z="0.0" x="1371.7149176529897"/>
  </node>
  <node id="157920" label="CDK8" cy:nodeId="105756">
    <graphics y="-81.79415132481563" z="0.0" x="114.17681264200337"/>
  </node>
  <node id="157917" label="DPM2" cy:nodeId="105758">
    <graphics y="-332.09285737950313" z="0.0" x="875.215222828771"/>
  </node>
  <node id="157918" label="CDK9" cy:nodeId="105757">
    <graphics y="-10.665138263292192" z="0.0" x="1218.8568854264272"/>
  </node>
  <node id="157916" label="PIGQ" cy:nodeId="105759">
    <graphics y="219.0250472835828" z="0.0" x="1134.3440680436147"/>
  </node>
  <node id="157892" label="MOGS" cy:nodeId="105762">
    <graphics y="-110.27561189610469" z="0.0" x="775.179090016271"/>
  </node>
  <node id="158014" label="POMT1" cy:nodeId="105761">
    <graphics y="323.82231901209843" z="0.0" x="864.003552906896"/>
  </node>
  <node id="157913" label="CEBPA" cy:nodeId="105764">
    <graphics y="-149.40419008213985" z="0.0" x="-1636.8995843001353"/>
  </node>
  <node id="157836" label="MFNG" cy:nodeId="105766">
    <graphics y="-357.2365799136828" z="0.0" x="-1522.0570550032603"/>
  </node>
  <node id="157911" label="NAGK" cy:nodeId="105765">
    <graphics y="12.538169842176558" z="0.0" x="-1585.8462395735728"/>
  </node>
  <node id="157901" label="CHD2" cy:nodeId="105770">
    <graphics y="510.1734542660047" z="0.0" x="-458.9315667220103"/>
  </node>
  <node id="157905" label="CHD1" cy:nodeId="105769">
    <graphics y="128.72118375819218" z="0.0" x="177.17079686441548"/>
  </node>
  <node id="157984" label="NDST2" cy:nodeId="105772">
    <graphics y="-116.63975526768672" z="0.0" x="-1002.0247063704478"/>
  </node>
  <node id="157904" label="OGT" cy:nodeId="105771">
    <graphics y="288.2758712581922" z="0.0" x="218.61141728677876"/>
  </node>
  <node id="157898" label="CHD8" cy:nodeId="105774">
    <graphics y="709.2415084652234" z="0.0" x="405.8902411393178"/>
  </node>
  <node id="157897" label="CIITA" cy:nodeId="105775">
    <graphics y="-157.41399003941524" z="0.0" x="-1148.0646233626353"/>
  </node>
  <node id="157834" label="GAL3ST4" cy:nodeId="105778">
    <graphics y="-28.253334064073442" z="0.0" x="-1285.8218255110728"/>
  </node>
  <node id="157896" label="MAN2B1" cy:nodeId="105777">
    <graphics y="-319.42121126133907" z="0.0" x="-1426.8545403548228"/>
  </node>
  <node id="157893" label="CPSF3L" cy:nodeId="105780">
    <graphics y="-63.44901277501094" z="0.0" x="1028.0444464615834"/>
  </node>
  <node id="157895" label="DSE" cy:nodeId="105779">
    <graphics y="-113.55915071446407" z="0.0" x="-1302.0582757063853"/>
  </node>
  <node id="157793" label="B4GALT7" cy:nodeId="105782">
    <graphics y="-1111.0825271793078" z="0.0" x="560.6916022233022"/>
  </node>
  <node id="157950" label="B3GALT6" cy:nodeId="105781">
    <graphics y="-153.4724540897082" z="0.0" x="824.8473639420522"/>
  </node>
  <node id="157915" label="B4GALNT4" cy:nodeId="105784">
    <graphics y="181.46843717616093" z="0.0" x="1001.995740406896"/>
  </node>
  <node id="157890" label="CREBBP" cy:nodeId="105790">
    <graphics y="452.23967741053593" z="0.0" x="418.39796208658345"/>
  </node>
  <node id="157940" label="B4GALT3" cy:nodeId="105789">
    <graphics y="-526.7805862613391" z="0.0" x="622.6016364029897"/>
  </node>
  <node id="157902" label="POFUT1" cy:nodeId="105792">
    <graphics y="155.52989957850468" z="0.0" x="-241.85853815755718"/>
  </node>
  <node id="157922" label="COG7" cy:nodeId="105791">
    <graphics y="222.43370817225468" z="0.0" x="864.4741339615834"/>
  </node>
  <node id="157887" label="CTNNB1" cy:nodeId="105794">
    <graphics y="-192.2707767337929" z="0.0" x="-281.2444634505259"/>
  </node>
  <node id="157888" label="CTBP1" cy:nodeId="105793">
    <graphics y="-220.44456483799922" z="0.0" x="1224.7562994889272"/>
  </node>
  <node id="157876" label="E2F1" cy:nodeId="105796">
    <graphics y="-266.531791705675" z="0.0" x="703.144177906896"/>
  </node>
  <node id="157883" label="DEK" cy:nodeId="105795">
    <graphics y="-530.1350479312609" z="0.0" x="247.2512946061147"/>
  </node>
  <node id="157954" label="SLC35B1" cy:nodeId="105798">
    <graphics y="-421.1794967838" z="0.0" x="702.7172980240834"/>
  </node>
  <node id="157875" label="ALG3" cy:nodeId="105797">
    <graphics y="-480.52716829258907" z="0.0" x="780.9252448014272"/>
  </node>
  <node id="157944" label="DPM1" cy:nodeId="105799">
    <graphics y="-654.0964431949328" z="0.0" x="566.0575690201772"/>
  </node>
  <node id="157855" label="FUT1" cy:nodeId="105802">
    <graphics y="-855.4093704410266" z="0.0" x="-1522.2551751204478"/>
  </node>
  <node id="157870" label="E2F6" cy:nodeId="105801">
    <graphics y="-585.7143020816516" z="0.0" x="497.7654547623647"/>
  </node>
  <node id="157868" label="E2F7" cy:nodeId="105803">
    <graphics y="-184.43786241490352" z="0.0" x="309.8730444840444"/>
  </node>
  <node id="157973" label="ST3GAL2" cy:nodeId="105806">
    <graphics y="35.18416593592656" z="0.0" x="491.5711493424428"/>
  </node>
  <node id="157668" label="B3GALT2" cy:nodeId="105808">
    <graphics y="-482.7965164371203" z="0.0" x="-2162.854296214198"/>
  </node>
  <node id="157659" label="CHST3" cy:nodeId="105807">
    <graphics y="-246.90798570591915" z="0.0" x="-593.6511712141978"/>
  </node>
  <node id="157710" label="FUT4" cy:nodeId="105810">
    <graphics y="265.55403898280156" z="0.0" x="-1449.3035149641978"/>
  </node>
  <node id="158000" label="TPST1" cy:nodeId="105809">
    <graphics y="1269.5999984554578" z="0.0" x="-2063.2874703474986"/>
  </node>
  <node id="157818" label="PIGK" cy:nodeId="106835">
    <graphics y="-241.31164934117305" z="0.0" x="-196.95991755208843"/>
  </node>
  <node id="157988" label="B3GNT2" cy:nodeId="106838">
    <graphics y="-285.27172090489375" z="0.0" x="-962.1904778548228"/>
  </node>
  <node id="157864" label="EGR2" cy:nodeId="105816">
    <graphics y="50.485725384168745" z="0.0" x="-485.9698968001353"/>
  </node>
  <node id="157758" label="ST6GALNAC3" cy:nodeId="105815">
    <graphics y="-451.2345047183703" z="0.0" x="-1851.5941643782603"/>
  </node>
  <node id="157725" label="B3GALT1" cy:nodeId="105818">
    <graphics y="-99.48172761876094" z="0.0" x="-93.3467278548228"/>
  </node>
  <node id="157805" label="UAP1" cy:nodeId="105820">
    <graphics y="-1227.925117511339" z="0.0" x="649.9426398209584"/>
  </node>
  <node id="158019" label="SLC35E1" cy:nodeId="106844">
    <graphics y="316.48336027186406" z="0.0" x="18.40330647745259"/>
  </node>
  <node id="157960" label="BRD4" cy:nodeId="106843">
    <graphics y="230.9946517757703" z="0.0" x="242.85192631998189"/>
  </node>
  <node id="157763" label="LFNG" cy:nodeId="106846">
    <graphics y="904.3494186214734" z="0.0" x="1444.9702887467397"/>
  </node>
  <node id="157817" label="COG6" cy:nodeId="105824">
    <graphics y="-300.94493867833125" z="0.0" x="-104.34788752279155"/>
  </node>
  <node id="157919" label="COG3" cy:nodeId="105823">
    <graphics y="5.734367351942183" z="0.0" x="122.68187855997212"/>
  </node>
  <node id="157932" label="CBX6" cy:nodeId="106847">
    <graphics y="627.4789962581922" z="0.0" x="7.393662922765088"/>
  </node>
  <node id="157863" label="ELK3" cy:nodeId="105826">
    <graphics y="-14.828849811143755" z="0.0" x="-401.8148369856822"/>
  </node>
  <node id="157884" label="DCP1A" cy:nodeId="106850">
    <graphics y="-312.59498598057735" z="0.0" x="-352.47154474935405"/>
  </node>
  <node id="157977" label="XYLT1" cy:nodeId="106854">
    <graphics y="516.1774215511609" z="0.0" x="691.029920094396"/>
  </node>
  <node id="157782" label="MAN1C1" cy:nodeId="106853">
    <graphics y="-177.2609691806506" z="0.0" x="-887.6052117415416"/>
  </node>
  <node id="157862" label="EP400" cy:nodeId="105829">
    <graphics y="808.8878707699109" z="0.0" x="-142.02339411458843"/>
  </node>
  <node id="157783" label="FUCA1" cy:nodeId="106856">
    <graphics y="-445.7762527652453" z="0.0" x="-1502.1074700423228"/>
  </node>
  <node id="157856" label="ERG" cy:nodeId="105832">
    <graphics y="-713.9583816714953" z="0.0" x="-1384.4843010970103"/>
  </node>
  <node id="157857" label="ERF" cy:nodeId="105831">
    <graphics y="-730.1151809879016" z="0.0" x="66.34260749139912"/>
  </node>
  <node id="157930" label="ST6GAL1" cy:nodeId="106855">
    <graphics y="-192.47498196739662" z="0.0" x="-1544.7367425032603"/>
  </node>
  <node id="157908" label="MGAT4A" cy:nodeId="106860">
    <graphics y="-206.37192441899288" z="0.0" x="-1471.8428216048228"/>
  </node>
  <node id="157744" label="GALNT7" cy:nodeId="106859">
    <graphics y="79.62593839686406" z="0.0" x="-1025.7848382063853"/>
  </node>
  <node id="157841" label="CHST7" cy:nodeId="105835">
    <graphics y="1260.302421551161" z="0.0" x="-965.4533410140025"/>
  </node>
  <node id="157821" label="FUS" cy:nodeId="106862">
    <graphics y="355.3386153988172" z="0.0" x="1331.2841315201772"/>
  </node>
  <node id="157693" label="SULT1C4" cy:nodeId="105837">
    <graphics y="551.0353927425672" z="0.0" x="-336.74119806966655"/>
  </node>
  <node id="157835" label="CHST15" cy:nodeId="106861">
    <graphics y="-234.12241746861446" z="0.0" x="-1047.0098137923228"/>
  </node>
  <node id="157860" label="GPI" cy:nodeId="106864">
    <graphics y="662.5442428402234" z="0.0" x="-1152.8040032454478"/>
  </node>
  <node id="157814" label="GAPDH" cy:nodeId="106863">
    <graphics y="855.6438522152234" z="0.0" x="-1316.4116692610728"/>
  </node>
  <node id="157851" label="ETS1" cy:nodeId="105839">
    <graphics y="-104.23238374669063" z="0.0" x="10.776410572911573"/>
  </node>
  <node id="157843" label="ETV1" cy:nodeId="105842">
    <graphics y="-347.540092486925" z="0.0" x="502.7288031510366"/>
  </node>
  <node id="157826" label="MGAT2" cy:nodeId="106868">
    <graphics y="-729.5647049136828" z="0.0" x="-192.13820124349468"/>
  </node>
  <node id="158002" label="EXTL2" cy:nodeId="105844">
    <graphics y="-242.79644777256954" z="0.0" x="294.3613562516225"/>
  </node>
  <node id="157788" label="HIF1A" cy:nodeId="106867">
    <graphics y="-373.78153230626094" z="0.0" x="-233.13048029622905"/>
  </node>
  <node id="157879" label="ARSB" cy:nodeId="105843">
    <graphics y="-150.91692735630977" z="0.0" x="109.84493016519673"/>
  </node>
  <node id="157840" label="EZH1" cy:nodeId="105846">
    <graphics y="802.6232223324109" z="0.0" x="342.64735173502095"/>
  </node>
  <node id="157966" label="SLC35B4" cy:nodeId="105845">
    <graphics y="283.73030851405156" z="0.0" x="114.09035252847798"/>
  </node>
  <node id="157837" label="FLI1" cy:nodeId="105848">
    <graphics y="-255.13798906285274" z="0.0" x="-1310.4028801985728"/>
  </node>
  <node id="157838" label="FANCD2" cy:nodeId="105847">
    <graphics y="118.65718839686406" z="0.0" x="783.4121832779897"/>
  </node>
  <node id="157766" label="KDM4A" cy:nodeId="106874">
    <graphics y="175.90105436366093" z="0.0" x="484.5291571549428"/>
  </node>
  <node id="157757" label="MAF" cy:nodeId="106876">
    <graphics y="-53.38391878087032" z="0.0" x="-1382.1976800032603"/>
  </node>
  <node id="157626" label="GLCE" cy:nodeId="105851">
    <graphics y="-595.8097915836047" z="0.0" x="-26.856272227381396"/>
  </node>
  <node id="157743" label="MEF2B" cy:nodeId="106877">
    <graphics y="0.3164596370984327" z="0.0" x="1382.4312262467397"/>
  </node>
  <node id="157824" label="FOXM1" cy:nodeId="105853">
    <graphics y="-230.23027040440547" z="0.0" x="613.4653448990834"/>
  </node>
  <node id="157711" label="POU2F2" cy:nodeId="106880">
    <graphics y="52.88478849452031" z="0.0" x="-1337.1449456282603"/>
  </node>
  <node id="157844" label="GNPNAT1" cy:nodeId="105855">
    <graphics y="-391.44583894688594" z="0.0" x="201.07296513834126"/>
  </node>
  <node id="157869" label="ALG6" cy:nodeId="106879">
    <graphics y="-488.68265535313594" z="0.0" x="367.9577460221303"/>
  </node>
  <node id="158018" label="GFPT1" cy:nodeId="106882">
    <graphics y="-13.786354083604692" z="0.0" x="-219.23640680990093"/>
  </node>
  <node id="157709" label="PPARA" cy:nodeId="106881">
    <graphics y="1001.0593795589734" z="0.0" x="82.54058694162495"/>
  </node>
  <node id="157979" label="DSEL" cy:nodeId="105857">
    <graphics y="-41.90192415196407" z="0.0" x="726.2251105240834"/>
  </node>
  <node id="157706" label="RARA" cy:nodeId="106884">
    <graphics y="-222.3766975589465" z="0.0" x="783.409070485021"/>
  </node>
  <node id="157755" label="NPL" cy:nodeId="105860">
    <graphics y="297.92757413905156" z="0.0" x="-1598.4847893782603"/>
  </node>
  <node id="157776" label="HK3" cy:nodeId="105859">
    <graphics y="-532.2193374820422" z="0.0" x="-1653.6219964095103"/>
  </node>
  <node id="157681" label="SIRT6" cy:nodeId="106885">
    <graphics y="-264.32845308262813" z="0.0" x="929.0293707779897"/>
  </node>
  <node id="157820" label="GABPA" cy:nodeId="105861">
    <graphics y="12.435371380262495" z="0.0" x="7.726472371007276"/>
  </node>
  <node id="157970" label="ALG13" cy:nodeId="105864">
    <graphics y="702.8346481136609" z="0.0" x="280.8725409440053"/>
  </node>
  <node id="157669" label="EXTL1" cy:nodeId="106887">
    <graphics y="-601.7567825504016" z="0.0" x="-2092.604540354823"/>
  </node>
  <node id="157812" label="GATAD1" cy:nodeId="105863">
    <graphics y="349.4034347347547" z="0.0" x="184.39796208658345"/>
  </node>
  <node id="157643" label="THAP11" cy:nodeId="106890">
    <graphics y="-393.10176851231563" z="0.0" x="836.4127936295522"/>
  </node>
  <node id="157809" label="GTF2B" cy:nodeId="105868">
    <graphics y="-915.6103592105578" z="0.0" x="673.6092047623647"/>
  </node>
  <node id="157923" label="COG4" cy:nodeId="106892">
    <graphics y="-145.4649963565539" z="0.0" x="889.0346198014272"/>
  </node>
  <node id="158003" label="COG8" cy:nodeId="106891">
    <graphics y="186.1583480648328" z="0.0" x="295.12318181314595"/>
  </node>
  <node id="157625" label="ZBTB10" cy:nodeId="106894">
    <graphics y="583.2697677425672" z="0.0" x="-179.9457268782603"/>
  </node>
  <node id="157803" label="GTF2F1" cy:nodeId="105870">
    <graphics y="362.25481412928593" z="0.0" x="633.1103033951772"/>
  </node>
  <node id="158004" label="STT3A" cy:nodeId="106893">
    <graphics y="-52.19815828282344" z="0.0" x="43.3678717545522"/>
  </node>
  <node id="157800" label="H2AFX" cy:nodeId="105872">
    <graphics y="-340.218803424425" z="0.0" x="1005.6759772233022"/>
  </node>
  <node id="157802" label="GTF2I" cy:nodeId="105871">
    <graphics y="153.96208951991093" z="0.0" x="-88.59280634603374"/>
  </node>
  <node id="157797" label="HCFC1" cy:nodeId="105873">
    <graphics y="265.0385970882703" z="0.0" x="386.2322821549428"/>
  </node>
  <node id="157845" label="DPAGT1" cy:nodeId="105878">
    <graphics y="-405.0271072574328" z="0.0" x="92.6994318894399"/>
  </node>
  <node id="157787" label="HINFP" cy:nodeId="105877">
    <graphics y="-592.8678360171984" z="0.0" x="752.0059332779897"/>
  </node>
  <node id="157955" label="TSTA3" cy:nodeId="105880">
    <graphics y="-652.5792923160266" z="0.0" x="1054.7903571061147"/>
  </node>
  <node id="157784" label="IKZF1" cy:nodeId="105882">
    <graphics y="-186.57427312809932" z="0.0" x="-1377.1313958235728"/>
  </node>
  <node id="157909" label="LIPA" cy:nodeId="105884">
    <graphics y="-92.70758058506954" z="0.0" x="-1569.4768548079478"/>
  </node>
  <node id="157927" label="GM2A" cy:nodeId="105883">
    <graphics y="-140.32334520298946" z="0.0" x="-1507.7709221907603"/>
  </node>
  <node id="157780" label="INTS3" cy:nodeId="105886">
    <graphics y="-114.72854616124141" z="0.0" x="1273.2937750748647"/>
  </node>
  <node id="157781" label="INO80" cy:nodeId="105885">
    <graphics y="670.1915206722547" z="0.0" x="594.847791188146"/>
  </node>
  <node id="157777" label="IRF8" cy:nodeId="105890">
    <graphics y="-281.76309968907344" z="0.0" x="-1509.6438469954478"/>
  </node>
  <node id="157778" label="IRF5" cy:nodeId="105889">
    <graphics y="-243.6259308047961" z="0.0" x="-1561.2806878157603"/>
  </node>
  <node id="157773" label="JMJD1C" cy:nodeId="105892">
    <graphics y="75.33403776209843" z="0.0" x="-587.642443186854"/>
  </node>
  <node id="157772" label="JMJD6" cy:nodeId="105894">
    <graphics y="-896.4224319644641" z="0.0" x="1071.684461110021"/>
  </node>
  <node id="157849" label="MGAT5" cy:nodeId="105893">
    <graphics y="-34.592582721300005" z="0.0" x="-298.6030755110728"/>
  </node>
  <node id="157751" label="FKRP" cy:nodeId="105896">
    <graphics y="116.28615568202031" z="0.0" x="1083.7024664811147"/>
  </node>
  <node id="157770" label="JUN" cy:nodeId="105895">
    <graphics y="-171.144491214342" z="0.0" x="-688.5576653548228"/>
  </node>
  <node id="157833" label="GBGT1" cy:nodeId="105897">
    <graphics y="-131.18152620274532" z="0.0" x="-1419.4496331282603"/>
  </node>
  <node id="157769" label="JUND" cy:nodeId="105899">
    <graphics y="336.0859298519422" z="0.0" x="1194.9163336686147"/>
  </node>
  <node id="157847" label="GNB1" cy:nodeId="105902">
    <graphics y="-75.54505922276485" z="0.0" x="590.3964362076772"/>
  </node>
  <node id="157768" label="KDM1A" cy:nodeId="105901">
    <graphics y="-204.0257578082751" z="0.0" x="706.8395514420522"/>
  </node>
  <node id="157660" label="GNS" cy:nodeId="105905">
    <graphics y="-365.32306673008907" z="0.0" x="-591.0403313704478"/>
  </node>
  <node id="157964" label="B3GALNT2" cy:nodeId="105908">
    <graphics y="66.54640958827031" z="0.0" x="234.20040654459126"/>
  </node>
  <node id="157759" label="RENBP" cy:nodeId="105912">
    <graphics y="-325.4629135318469" z="0.0" x="-1933.3264641829478"/>
  </node>
  <node id="157760" label="LYL1" cy:nodeId="105911">
    <graphics y="-311.38507844883907" z="0.0" x="-1686.9918694563853"/>
  </node>
  <node id="157756" label="MAFB" cy:nodeId="105914">
    <graphics y="108.53038785975468" z="0.0" x="-1433.7031731673228"/>
  </node>
  <node id="157753" label="MAZ" cy:nodeId="105916">
    <graphics y="-348.4581070132922" z="0.0" x="935.1844000748647"/>
  </node>
  <node id="157699" label="MGAT4B" cy:nodeId="105918">
    <graphics y="-754.0826492496203" z="0.0" x="189.52208470621235"/>
  </node>
  <node id="157951" label="B4GALT2" cy:nodeId="105917">
    <graphics y="-210.96309282261836" z="0.0" x="860.8654913834584"/>
  </node>
  <node id="157635" label="ST6GALNAC1" cy:nodeId="105920">
    <graphics y="1269.5999984554578" z="0.0" x="-1863.7206444807994"/>
  </node>
  <node id="157630" label="IDS" cy:nodeId="105922">
    <graphics y="581.4856490902234" z="0.0" x="-783.3940911360728"/>
  </node>
  <node id="157748" label="MECP2" cy:nodeId="105921">
    <graphics y="608.1509933285047" z="0.0" x="-86.28950739583843"/>
  </node>
  <node id="157997" label="ATF7" cy:nodeId="107972">
    <graphics y="504.64128873866093" z="0.0" x="-22.20700312337749"/>
  </node>
  <node id="157806" label="NEU1" cy:nodeId="107971">
    <graphics y="-1035.3215408511828" z="0.0" x="664.831189625646"/>
  </node>
  <node id="157996" label="NDST1" cy:nodeId="105923">
    <graphics y="649.7507247738172" z="0.0" x="215.5818610123647"/>
  </node>
  <node id="157742" label="MEF2C" cy:nodeId="105926">
    <graphics y="1260.302421551161" z="0.0" x="-566.319689280604"/>
  </node>
  <node id="157746" label="MEF2A" cy:nodeId="105925">
    <graphics y="-32.519157428331255" z="0.0" x="-951.4816765852916"/>
  </node>
  <node id="157795" label="SLC35F1" cy:nodeId="105927">
    <graphics y="-254.20405199009883" z="0.0" x="1017.0695929459584"/>
  </node>
  <node id="157953" label="C17orf96" cy:nodeId="107978">
    <graphics y="-288.3661880679797" z="0.0" x="1126.4348883561147"/>
  </node>
  <node id="157740" label="MITF" cy:nodeId="105929">
    <graphics y="-72.0597458072375" z="0.0" x="-1481.4888176985728"/>
  </node>
  <node id="157958" label="BRD7" cy:nodeId="107977">
    <graphics y="956.9262008480359" z="0.0" x="326.4345221451772"/>
  </node>
  <node id="157718" label="PIGX" cy:nodeId="107980">
    <graphics y="670.2566451839734" z="0.0" x="717.2667975358022"/>
  </node>
  <node id="157678" label="SLC35F2" cy:nodeId="107979">
    <graphics y="300.0068282894422" z="0.0" x="-660.8051018782603"/>
  </node>
  <node id="157736" label="MYBL1" cy:nodeId="105934">
    <graphics y="799.1566695980359" z="0.0" x="878.1325201920522"/>
  </node>
  <node id="157737" label="MXD3" cy:nodeId="105933">
    <graphics y="-46.05448152501094" z="0.0" x="824.3795905045522"/>
  </node>
  <node id="157975" label="RPN1" cy:nodeId="105936">
    <graphics y="-1057.5533523746203" z="0.0" x="777.869031422521"/>
  </node>
  <node id="157735" label="MYBL2" cy:nodeId="105935">
    <graphics y="-362.78804780919063" z="0.0" x="587.7510504654897"/>
  </node>
  <node id="157741" label="HS3ST4" cy:nodeId="105938">
    <graphics y="1269.5999984554578" z="0.0" x="-466.75286341390483"/>
  </node>
  <node id="157871" label="E2F4" cy:nodeId="107987">
    <graphics y="-139.78943254429805" z="0.0" x="1056.8598151139272"/>
  </node>
  <node id="157733" label="MZF1" cy:nodeId="105942">
    <graphics y="229.2287826351453" z="0.0" x="1237.8742194108022"/>
  </node>
  <node id="157952" label="B4GALNT1" cy:nodeId="107990">
    <graphics y="-405.09159090001094" z="0.0" x="1236.0601324967397"/>
  </node>
  <node id="157981" label="HAS3" cy:nodeId="105941">
    <graphics y="-278.9074478336047" z="0.0" x="-763.0170769759166"/>
  </node>
  <node id="157808" label="ALG14" cy:nodeId="107992">
    <graphics y="-924.5384597964953" z="0.0" x="833.8532233170522"/>
  </node>
  <node id="157727" label="NFIC" cy:nodeId="105945">
    <graphics y="88.64717863123906" z="0.0" x="-86.30035639486186"/>
  </node>
  <node id="157903" label="SLC35D1" cy:nodeId="105950">
    <graphics y="374.06133268397343" z="0.0" x="-0.9599175520884273"/>
  </node>
  <node id="157723" label="NR2C2" cy:nodeId="105949">
    <graphics y="248.09496305506718" z="0.0" x="4.535787098790479"/>
  </node>
  <node id="157722" label="NR2F1" cy:nodeId="105951">
    <graphics y="1269.5999984554578" z="0.0" x="-1065.4533410140025"/>
  </node>
  <node id="157771" label="NANS" cy:nodeId="108002">
    <graphics y="-1056.9809646793078" z="0.0" x="1249.8054938248647"/>
  </node>
  <node id="157774" label="PIGM" cy:nodeId="105954">
    <graphics y="296.3212814144422" z="0.0" x="-121.15466547689311"/>
  </node>
  <node id="157717" label="PBX1" cy:nodeId="105953">
    <graphics y="530.1334152035047" z="0.0" x="69.01913904466755"/>
  </node>
  <node id="157688" label="SLC35A1" cy:nodeId="108001">
    <graphics y="-611.3326187320422" z="0.0" x="307.6509833268178"/>
  </node>
  <node id="157716" label="PCGF1" cy:nodeId="105955">
    <graphics y="-888.4946365543078" z="0.0" x="942.905896656896"/>
  </node>
  <node id="157714" label="PHF6" cy:nodeId="105957">
    <graphics y="731.6342696956922" z="0.0" x="-39.886835581873584"/>
  </node>
  <node id="157807" label="DAD1" cy:nodeId="108008">
    <graphics y="-1212.9574051089953" z="0.0" x="763.9281744889272"/>
  </node>
  <node id="157713" label="POLR2B" cy:nodeId="105959">
    <graphics y="-26.892875690050005" z="0.0" x="194.87486027994282"/>
  </node>
  <node id="157707" label="RAC3" cy:nodeId="105964">
    <graphics y="-766.3983230777453" z="0.0" x="925.1255621842397"/>
  </node>
  <node id="157708" label="PRKDC" cy:nodeId="105963">
    <graphics y="156.25228117030156" z="0.0" x="98.6638808182729"/>
  </node>
  <node id="157665" label="CHST10" cy:nodeId="108013">
    <graphics y="532.5233077816297" z="0.0" x="455.70863103189595"/>
  </node>
  <node id="157705" label="RB1" cy:nodeId="105965">
    <graphics y="-315.8203888126086" z="0.0" x="84.78667020120747"/>
  </node>
  <node id="157701" label="RBL2" cy:nodeId="105968">
    <graphics y="256.3231124691297" z="0.0" x="-195.98628473958843"/>
  </node>
  <node id="157724" label="NOTCH1" cy:nodeId="108016">
    <graphics y="349.2032394222547" z="0.0" x="733.3050055436147"/>
  </node>
  <node id="157704" label="RBBP5" cy:nodeId="105967">
    <graphics y="134.47566984217656" z="0.0" x="14.663781636143995"/>
  </node>
  <node id="157698" label="REST" cy:nodeId="105970">
    <graphics y="192.63402555506718" z="0.0" x="-575.7997307845103"/>
  </node>
  <node id="157694" label="RFX5" cy:nodeId="105972">
    <graphics y="425.53105924647343" z="0.0" x="-314.4619622298228"/>
  </node>
  <node id="157697" label="RFX1" cy:nodeId="105971">
    <graphics y="508.54009244959843" z="0.0" x="285.2215552262319"/>
  </node>
  <node id="157692" label="RFX7" cy:nodeId="105974">
    <graphics y="490.8773116878797" z="0.0" x="-244.17750788411968"/>
  </node>
  <node id="157702" label="RBL1" cy:nodeId="108022">
    <graphics y="-100.84714509922969" z="0.0" x="448.9069342545522"/>
  </node>
  <node id="157815" label="COG2" cy:nodeId="105973">
    <graphics y="348.9341964535047" z="0.0" x="-226.4025139876353"/>
  </node>
  <node id="157700" label="RELA" cy:nodeId="108024">
    <graphics y="-405.03258516270625" z="0.0" x="364.9316840104116"/>
  </node>
  <node id="157819" label="FPGT" cy:nodeId="105976">
    <graphics y="-343.57527925450313" z="0.0" x="-18.33561182699077"/>
  </node>
  <node id="157689" label="RNF2" cy:nodeId="105975">
    <graphics y="-552.0452957339953" z="0.0" x="438.7220282486928"/>
  </node>
  <node id="157959" label="POMT2" cy:nodeId="108023">
    <graphics y="404.1168136410047" z="0.0" x="576.5420050553334"/>
  </node>
  <node id="157936" label="GLA" cy:nodeId="108026">
    <graphics y="-751.4291458316516" z="0.0" x="683.1762213639272"/>
  </node>
  <node id="157685" label="SCML2" cy:nodeId="108025">
    <graphics y="29.922630291395308" z="0.0" x="356.0298590592397"/>
  </node>
  <node id="157622" label="PIGA" cy:nodeId="108027">
    <graphics y="680.2412643245984" z="0.0" x="-301.9062676497447"/>
  </node>
  <node id="157848" label="SULF2" cy:nodeId="105979">
    <graphics y="-443.34545137364375" z="0.0" x="-120.24647761068218"/>
  </node>
  <node id="157652" label="TBP" cy:nodeId="108030">
    <graphics y="-308.9549865909289" z="0.0" x="387.9401678971303"/>
  </node>
  <node id="157658" label="STAT5B" cy:nodeId="108029">
    <graphics y="125.92513273280156" z="0.0" x="-337.9068169661509"/>
  </node>
  <node id="157687" label="RXRA" cy:nodeId="105983">
    <graphics y="1066.208915691786" z="0.0" x="265.7985815934194"/>
  </node>
  <node id="157991" label="UGCG" cy:nodeId="105985">
    <graphics y="-176.85143758732784" z="0.0" x="-504.5704827376353"/>
  </node>
  <node id="157676" label="SMAD4" cy:nodeId="105987">
    <graphics y="-41.25827791172969" z="0.0" x="365.0098395279897"/>
  </node>
  <node id="157672" label="SMC1A" cy:nodeId="105989">
    <graphics y="206.72823331873906" z="0.0" x="47.462434285069776"/>
  </node>
  <node id="157670" label="SOX10" cy:nodeId="105991">
    <graphics y="-461.2169265933703" z="0.0" x="-1966.3645501204478"/>
  </node>
  <node id="158008" label="GANAB" cy:nodeId="105998">
    <graphics y="-73.79628755528438" z="0.0" x="311.70940923013814"/>
  </node>
  <node id="157910" label="HPSE" cy:nodeId="106000">
    <graphics y="-317.9837951846789" z="0.0" x="-1602.2277093001353"/>
  </node>
  <node id="157657" label="SUMO2" cy:nodeId="106004">
    <graphics y="-674.2065200992297" z="0.0" x="705.6438727311147"/>
  </node>
  <node id="157655" label="TAF1" cy:nodeId="106006">
    <graphics y="574.3347091488172" z="0.0" x="580.4542975358022"/>
  </node>
  <node id="157963" label="COG1" cy:nodeId="106005">
    <graphics y="488.77629850428593" z="0.0" x="351.3219427994741"/>
  </node>
  <node id="157650" label="TCF12" cy:nodeId="106007">
    <graphics y="-4.762214679307817" z="0.0" x="253.1333746842397"/>
  </node>
  <node id="157649" label="TCF7L1" cy:nodeId="106009">
    <graphics y="569.2905196956922" z="0.0" x="1033.4636969498647"/>
  </node>
  <node id="157943" label="ALG5" cy:nodeId="106012">
    <graphics y="-730.7931595035266" z="0.0" x="510.2641425065053"/>
  </node>
  <node id="157675" label="GALNT1" cy:nodeId="106014">
    <graphics y="169.78185270350468" z="0.0" x="572.406384938146"/>
  </node>
  <node id="157648" label="TEAD1" cy:nodeId="106013">
    <graphics y="445.89421842616093" z="0.0" x="236.19459294595845"/>
  </node>
  <node id="157646" label="TET2" cy:nodeId="106016">
    <graphics y="404.8835372738172" z="0.0" x="-436.2144341536509"/>
  </node>
  <node id="157641" label="TRIM28" cy:nodeId="106018">
    <graphics y="-130.5829734988879" z="0.0" x="715.8371100358022"/>
  </node>
  <node id="157638" label="UBTF" cy:nodeId="106020">
    <graphics y="358.30474088709843" z="0.0" x="930.1738409928334"/>
  </node>
  <node id="157636" label="USF2" cy:nodeId="106022">
    <graphics y="1260.302421551161" z="0.0" x="-1963.2874703474986"/>
  </node>
  <node id="157637" label="USF1" cy:nodeId="106021">
    <graphics y="-569.8787307925891" z="0.0" x="869.9195074967397"/>
  </node>
  <node id="157632" label="WDR5" cy:nodeId="106024">
    <graphics y="-8.825477618760942" z="0.0" x="655.832166188146"/>
  </node>
  <node id="157634" label="VEZF1" cy:nodeId="106023">
    <graphics y="504.27751920741093" z="0.0" x="-134.91394282064311"/>
  </node>
  <node id="157627" label="XRN2" cy:nodeId="106025">
    <graphics y="-306.8461456485461" z="0.0" x="168.17993687906392"/>
  </node>
  <node id="157629" label="GALNT5" cy:nodeId="106027">
    <graphics y="466.1081466488172" z="0.0" x="-767.2314324446666"/>
  </node>
  <node id="157624" label="ZBTB17" cy:nodeId="106029">
    <graphics y="38.00595853846562" z="0.0" x="986.496472828771"/>
  </node>
  <node id="157804" label="C1GALT1C1" cy:nodeId="106032">
    <graphics y="-1146.331123370714" z="0.0" x="884.875867360021"/>
  </node>
  <node id="157623" label="ZBTB33" cy:nodeId="106031">
    <graphics y="333.66313932459843" z="0.0" x="-69.41571284017436"/>
  </node>
  <node id="157982" label="B4GALT1" cy:nodeId="107274">
    <graphics y="-109.35350038487422" z="0.0" x="-1230.1637444563853"/>
  </node>
  <node id="157962" label="BRD2" cy:nodeId="107276">
    <graphics y="193.9745101742078" z="0.0" x="155.70182561197407"/>
  </node>
  <node id="157972" label="BCL6" cy:nodeId="107275">
    <graphics y="183.52965543787968" z="0.0" x="-913.647325999354"/>
  </node>
  <node id="158010" label="FUT10" cy:nodeId="107278">
    <graphics y="299.8150558285047" z="0.0" x="-286.7633843489634"/>
  </node>
  <node id="157961" label="BRD3" cy:nodeId="107277">
    <graphics y="468.60039518397343" z="0.0" x="756.7751593522084"/>
  </node>
  <node id="157987" label="B4GALT5" cy:nodeId="107279">
    <graphics y="-187.318901080675" z="0.0" x="-382.54124689779155"/>
  </node>
  <node id="157882" label="DNMT3A" cy:nodeId="107282">
    <graphics y="-122.19488527256954" z="0.0" x="274.38929509439595"/>
  </node>
  <node id="157651" label="SLC35B3" cy:nodeId="107281">
    <graphics y="-621.5280838199328" z="0.0" x="172.13013219156392"/>
  </node>
  <node id="157872" label="E2F3" cy:nodeId="107284">
    <graphics y="73.30522916834843" z="0.0" x="130.3877806595815"/>
  </node>
  <node id="157942" label="ALG8" cy:nodeId="107286">
    <graphics y="-644.8874283023547" z="0.0" x="420.2406439713491"/>
  </node>
  <node id="157750" label="FUT2" cy:nodeId="107287">
    <graphics y="116.08736417811406" z="0.0" x="1285.9427008561147"/>
  </node>
  <node id="157859" label="ERCC3" cy:nodeId="107292">
    <graphics y="69.21944425623906" z="0.0" x="596.8151373795522"/>
  </node>
  <node id="157633" label="PAPSS1" cy:nodeId="107291">
    <graphics y="839.0264205745984" z="0.0" x="-319.8581719466197"/>
  </node>
  <node id="157831" label="FOSL1" cy:nodeId="107294">
    <graphics y="-706.5398636050891" z="0.0" x="-368.7170891829478"/>
  </node>
  <node id="157829" label="HK1" cy:nodeId="107293">
    <graphics y="-560.1432876773547" z="0.0" x="-518.8555169173228"/>
  </node>
  <node id="157761" label="GCNT2" cy:nodeId="107296">
    <graphics y="-331.7523269839953" z="0.0" x="754.2234625748647"/>
  </node>
  <node id="157825" label="FOXK1" cy:nodeId="107298">
    <graphics y="584.8170089535047" z="0.0" x="263.22906255045064"/>
  </node>
  <node id="157978" label="GNE" cy:nodeId="107297">
    <graphics y="29.628730755262495" z="0.0" x="795.8939948014272"/>
  </node>
  <node id="157881" label="ALG11" cy:nodeId="107300">
    <graphics y="-135.41266633946407" z="0.0" x="200.92663335123189"/>
  </node>
  <node id="157880" label="EXTL3" cy:nodeId="107299">
    <graphics y="-446.6400222964953" z="0.0" x="280.9835638932241"/>
  </node>
  <node id="157801" label="GTF3C2" cy:nodeId="107302">
    <graphics y="107.33687589686406" z="0.0" x="413.46046208658345"/>
  </node>
  <node id="157794" label="HDAC3" cy:nodeId="107304">
    <graphics y="-754.4608841129016" z="0.0" x="600.2270026139272"/>
  </node>
  <node id="157983" label="GALNT2" cy:nodeId="107306">
    <graphics y="13.69907377284062" z="0.0" x="-630.0568718977916"/>
  </node>
  <node id="157937" label="GNPDA1" cy:nodeId="107305">
    <graphics y="-997.1837234683703" z="0.0" x="579.4867987565053"/>
  </node>
  <node id="157791" label="EXT2" cy:nodeId="107307">
    <graphics y="-1088.172187823839" z="0.0" x="445.2584662369741"/>
  </node>
  <node id="157832" label="NAAA" cy:nodeId="107310">
    <graphics y="-419.462944049425" z="0.0" x="-1394.2444329329478"/>
  </node>
  <node id="157926" label="GBA" cy:nodeId="107309">
    <graphics y="-45.584342975206255" z="0.0" x="-1666.1521477766978"/>
  </node>
  <node id="157775" label="JARID2" cy:nodeId="107311">
    <graphics y="410.5489425472547" z="0.0" x="-68.1432366438853"/>
  </node>
  <node id="157765" label="KDM5C" cy:nodeId="107314">
    <graphics y="234.0445785335828" z="0.0" x="-76.70714045247905"/>
  </node>
  <node id="157767" label="KDM2B" cy:nodeId="107313">
    <graphics y="186.27898405116093" z="0.0" x="371.2182135514272"/>
  </node>
  <node id="157852" label="ABO" cy:nodeId="107319">
    <graphics y="-893.0968704410266" z="0.0" x="-1395.5941643782603"/>
  </node>
  <node id="157762" label="LIN9" cy:nodeId="107321">
    <graphics y="-158.28642274815547" z="0.0" x="651.7061285904897"/>
  </node>
  <node id="157747" label="MED12" cy:nodeId="107324">
    <graphics y="452.30742643397343" z="0.0" x="158.2571310929311"/>
  </node>
  <node id="157752" label="MBD3" cy:nodeId="107323">
    <graphics y="-29.895057696885942" z="0.0" x="1125.1084723404897"/>
  </node>
  <node id="157730" label="NCOR2" cy:nodeId="107326">
    <graphics y="384.89116666834843" z="0.0" x="486.89613103189595"/>
  </node>
  <node id="157853" label="PAPSS2" cy:nodeId="107328">
    <graphics y="-578.9688186832141" z="0.0" x="-1346.7733635970103"/>
  </node>
  <node id="157811" label="POFUT2" cy:nodeId="107327">
    <graphics y="730.8712081722547" z="0.0" x="73.06063913622029"/>
  </node>
  <node id="157938" label="PIGY" cy:nodeId="107332">
    <graphics y="-755.8027420230578" z="0.0" x="762.0019659928334"/>
  </node>
  <node id="157720" label="NRF1" cy:nodeId="107333">
    <graphics y="82.92205045741093" z="0.0" x="715.8930792740834"/>
  </node>
  <node id="157690" label="RLF" cy:nodeId="107337">
    <graphics y="798.4659957699109" z="0.0" x="488.7835211686147"/>
  </node>
  <node id="157684" label="SETDB1" cy:nodeId="107339">
    <graphics y="-63.486930865831255" z="0.0" x="515.6924567154897"/>
  </node>
  <node id="157677" label="SMAD3" cy:nodeId="107342">
    <graphics y="777.9745406917859" z="0.0" x="243.11228703775532"/>
  </node>
  <node id="157680" label="SMAD1" cy:nodeId="107341">
    <graphics y="206.54891202967656" z="0.0" x="-342.5779595442759"/>
  </node>
  <node id="157674" label="SMARCA4" cy:nodeId="107343">
    <graphics y="138.02745817225468" z="0.0" x="658.695935719396"/>
  </node>
  <node id="157662" label="SP2" cy:nodeId="107346">
    <graphics y="610.4141769222547" z="0.0" x="352.4607977799428"/>
  </node>
  <node id="157666" label="SOX2" cy:nodeId="107345">
    <graphics y="305.7215499691297" z="0.0" x="469.6364569596303"/>
  </node>
  <node id="157661" label="STAT3" cy:nodeId="107347">
    <graphics y="-83.11949922520625" z="0.0" x="-369.5599846907603"/>
  </node>
  <node id="157739" label="LAMP2" cy:nodeId="107350">
    <graphics y="136.38597868006718" z="0.0" x="-1686.5382561751353"/>
  </node>
  <node id="157647" label="TERF2" cy:nodeId="107353">
    <graphics y="214.0143050960828" z="0.0" x="703.770398610021"/>
  </node>
</graph>
