# Supplementary material for: A systems-based framework to computationally describe putative transcription factors and signaling pathways regulating glycan biosynthesis
Source: publisher site journal article supplement (doi:10.3762/bjoc.17.119), 2021-07-22
Supplement: Additional file 2 [file 1860-5397-17-119-S2.cys › CytoscapeSession-2021_03_21-12_01/views/109659-139114-HNSC.xgmml]

<?xml version="1.0" encoding="UTF-8" standalone="yes"?>
<graph id="139114" label="HNSC" cy:view="1" cy:networkId="109659" cy:visualStyle="default" cy:rendererId="org.cytoscape.ding" cy:documentVersion="3.0" xmlns:dc="http://purl.org/dc/elements/1.1/" xmlns:xlink="http://www.w3.org/1999/xlink" xmlns:rdf="http://www.w3.org/1999/02/22-rdf-syntax-ns#" xmlns:cy="http://www.cytoscape.org" xmlns="http://www.cs.rpi.edu/XGMML">
  <graphics>
    <att name="NETWORK_NODE_SELECTION" value="true" type="string" cy:type="String"/>
    <att name="NETWORK_CENTER_X_LOCATION" value="-89.8668212890625" type="string" cy:type="String"/>
    <att name="NETWORK_HEIGHT" value="510.0" type="string" cy:type="String"/>
    <att name="NETWORK_TITLE" value="HNSC" type="string" cy:type="String"/>
    <att name="NETWORK_EDGE_SELECTION" value="true" type="string" cy:type="String"/>
    <att name="NETWORK_CENTER_Y_LOCATION" value="99.21875" type="string" cy:type="String"/>
    <att name="NETWORK_WIDTH" value="1312.0" type="string" cy:type="String"/>
    <att name="NETWORK_DEPTH" value="0.0" type="string" cy:type="String"/>
    <att name="NETWORK_SCALE_FACTOR" value="0.16873418256744918" type="string" cy:type="String"/>
    <att name="NETWORK_ANNOTATION_SELECTION" value="false" type="string" cy:type="String"/>
    <att name="NETWORK_CENTER_Z_LOCATION" value="0.0" type="string" cy:type="String"/>
  </graphics>
  <node id="139483" label="ATF4" cy:nodeId="108550">
    <graphics y="1562.7464807802485" z="0.0" x="-1408.559893210729"/>
  </node>
  <node id="139261" label="GCNT1" cy:nodeId="108552">
    <graphics y="-351.3780767148687" z="0.0" x="1424.2179006735485"/>
  </node>
  <node id="139351" label="UGDH" cy:nodeId="108551">
    <graphics y="319.6735132509516" z="0.0" x="-98.08974703152967"/>
  </node>
  <node id="139365" label="ALG9" cy:nodeId="108554">
    <graphics y="599.8871973329829" z="0.0" x="1122.4163870016735"/>
  </node>
  <node id="139251" label="DDOST" cy:nodeId="108555">
    <graphics y="395.83189948142035" z="0.0" x="-566.4800363381703"/>
  </node>
  <node id="139210" label="PIGF" cy:nodeId="108557">
    <graphics y="-20.16297356545465" z="0.0" x="-1907.2603708108265"/>
  </node>
  <node id="139417" label="CEBPZ" cy:nodeId="108564">
    <graphics y="-505.9099828427984" z="0.0" x="-248.71248873074842"/>
  </node>
  <node id="139284" label="B3GNT4" cy:nodeId="108566">
    <graphics y="1562.7464807802485" z="0.0" x="-809.8594156106312"/>
  </node>
  <node id="139371" label="NAGA" cy:nodeId="108567">
    <graphics y="64.33420355856879" z="0.0" x="373.11243192354846"/>
  </node>
  <node id="139178" label="SLC35B2" cy:nodeId="108572">
    <graphics y="640.5223291689204" z="0.0" x="-502.7278390725453"/>
  </node>
  <node id="139367" label="EBNA1BP2" cy:nodeId="108576">
    <graphics y="948.1908472353266" z="0.0" x="-942.560785849889"/>
  </node>
  <node id="139333" label="EXT1" cy:nodeId="108580">
    <graphics y="-203.6343366330816" z="0.0" x="2.2705434958140813"/>
  </node>
  <node id="139312" label="ST3GAL1" cy:nodeId="108579">
    <graphics y="-26.164652032251524" z="0.0" x="546.2989248434703"/>
  </node>
  <node id="139331" label="EZH2" cy:nodeId="108582">
    <graphics y="100.5966089540766" z="0.0" x="-636.8341623147328"/>
  </node>
  <node id="139407" label="SLC35A4" cy:nodeId="108586">
    <graphics y="-210.0485440915777" z="0.0" x="1490.331792275111"/>
  </node>
  <node id="139153" label="HEXB" cy:nodeId="108585">
    <graphics y="192.0740259462641" z="0.0" x="1231.739751259486"/>
  </node>
  <node id="139309" label="FOXO3" cy:nodeId="108587">
    <graphics y="-648.4088536924078" z="0.0" x="27.249798218409296"/>
  </node>
  <node id="139290" label="HDAC2" cy:nodeId="108592">
    <graphics y="512.7390039736079" z="0.0" x="-444.9492746194203"/>
  </node>
  <node id="139239" label="MAFF" cy:nodeId="108598">
    <graphics y="-942.8684789365484" z="0.0" x="-13.052748282750372"/>
  </node>
  <node id="139327" label="STS" cy:nodeId="108600">
    <graphics y="-494.6648351377203" z="0.0" x="1091.0948537985485"/>
  </node>
  <node id="139196" label="RFX2" cy:nodeId="108611">
    <graphics y="241.44234259665473" z="0.0" x="-440.7190805276234"/>
  </node>
  <node id="139194" label="RING1" cy:nodeId="108613">
    <graphics y="69.33377631247504" z="0.0" x="-1357.9168649514515"/>
  </node>
  <node id="139186" label="SFPQ" cy:nodeId="108616">
    <graphics y="373.4283960634516" z="0.0" x="-476.50316866238904"/>
  </node>
  <node id="139171" label="SNAPC1" cy:nodeId="108618">
    <graphics y="-40.22268883645074" z="0.0" x="-558.3668771584828"/>
  </node>
  <node id="139179" label="SMARCB1" cy:nodeId="108617">
    <graphics y="295.6489771181391" z="0.0" x="-381.77819307645154"/>
  </node>
  <node id="139167" label="SOX9" cy:nodeId="108621">
    <graphics y="234.91261847556098" z="0.0" x="1064.682378212611"/>
  </node>
  <node id="139131" label="UBE2I" cy:nodeId="108629">
    <graphics y="425.6703394228266" z="0.0" x="-956.9917550881703"/>
  </node>
  <node id="139437" label="C1GALT1" cy:nodeId="109670">
    <graphics y="766.6179102236079" z="0.0" x="-1068.423334678014"/>
  </node>
  <node id="139440" label="UXS1" cy:nodeId="109669">
    <graphics y="262.1136072450922" z="0.0" x="-216.6810403664906"/>
  </node>
  <node id="139419" label="NEU2" cy:nodeId="109672">
    <graphics y="1553.4489038759516" z="0.0" x="-1707.6935449441273"/>
  </node>
  <node id="139421" label="ALG2" cy:nodeId="109671">
    <graphics y="202.39232428610785" z="0.0" x="-966.7264962991078"/>
  </node>
  <node id="139368" label="HS3ST2" cy:nodeId="109674">
    <graphics y="-461.5019017881109" z="0.0" x="940.719975868861"/>
  </node>
  <node id="139375" label="SMPD1" cy:nodeId="109673">
    <graphics y="157.87975104392035" z="0.0" x="958.0523733297985"/>
  </node>
  <node id="139319" label="UGT1A7" cy:nodeId="109676">
    <graphics y="1147.048391180639" z="0.0" x="704.3247732321422"/>
  </node>
  <node id="139343" label="GLB1" cy:nodeId="109675">
    <graphics y="-156.48915020882623" z="0.0" x="565.166264931361"/>
  </node>
  <node id="139303" label="GLIS1" cy:nodeId="109678">
    <graphics y="-997.5622045224859" z="0.0" x="990.104253212611"/>
  </node>
  <node id="139304" label="GATA3" cy:nodeId="109677">
    <graphics y="48.57579596579535" z="0.0" x="1233.9627737204235"/>
  </node>
  <node id="139275" label="NAGLU" cy:nodeId="109680">
    <graphics y="477.4946802431391" z="0.0" x="663.5694021383922"/>
  </node>
  <node id="139283" label="HEY1" cy:nodeId="109679">
    <graphics y="226.26851447165473" z="0.0" x="568.4989065329235"/>
  </node>
  <node id="139230" label="ST8SIA5" cy:nodeId="109682">
    <graphics y="-660.8238317197515" z="0.0" x="1107.0975393454235"/>
  </node>
  <node id="139240" label="LMNB1" cy:nodeId="109681">
    <graphics y="-162.9266893094732" z="0.0" x="-393.8694406350453"/>
  </node>
  <node id="139219" label="XYLT2" cy:nodeId="109684">
    <graphics y="48.57871039450629" z="0.0" x="259.39645902315783"/>
  </node>
  <node id="139226" label="MXD1" cy:nodeId="109683">
    <graphics y="1562.7464807802485" z="0.0" x="-1208.9930673440297"/>
  </node>
  <node id="139175" label="SNAI2" cy:nodeId="109686">
    <graphics y="-250.28840844094293" z="0.0" x="129.36098996798205"/>
  </node>
  <node id="139213" label="NR1H2" cy:nodeId="109685">
    <graphics y="8.758306341771913" z="0.0" x="1727.5267385641735"/>
  </node>
  <node id="139168" label="UGT1A3" cy:nodeId="109688">
    <graphics y="1137.886770086889" z="0.0" x="870.7656912008922"/>
  </node>
  <node id="139169" label="UGT1A9" cy:nodeId="109687">
    <graphics y="1029.185109930639" z="0.0" x="922.8783620993297"/>
  </node>
  <node id="139141" label="TEAD2" cy:nodeId="109690">
    <graphics y="469.6255396181391" z="0.0" x="463.5741323630016"/>
  </node>
  <node id="139165" label="PIGG" cy:nodeId="109689">
    <graphics y="-853.5795385068609" z="0.0" x="-806.2011056741078"/>
  </node>
  <node id="139126" label="WRNIP1" cy:nodeId="109692">
    <graphics y="335.077413397436" z="0.0" x="-1026.601069053014"/>
  </node>
  <node id="139137" label="TGIF1" cy:nodeId="109691">
    <graphics y="508.38048346579535" z="0.0" x="-1051.859858115514"/>
  </node>
  <node id="139508" label="ADNP" cy:nodeId="105684">
    <graphics y="90.8185327822016" z="0.0" x="1423.2293752829235"/>
  </node>
  <node id="139506" label="AFF4" cy:nodeId="105686">
    <graphics y="-320.53040520607965" z="0.0" x="219.31990567843127"/>
  </node>
  <node id="139507" label="FUT7" cy:nodeId="105685">
    <graphics y="-76.36831871926324" z="0.0" x="1157.435796181361"/>
  </node>
  <node id="139504" label="STT3B" cy:nodeId="105688">
    <graphics y="-294.0412847226812" z="0.0" x="100.60465757052111"/>
  </node>
  <node id="139505" label="MAN1A2" cy:nodeId="105687">
    <graphics y="-146.35833756386774" z="0.0" x="9.05724469820666"/>
  </node>
  <node id="139502" label="FUT11" cy:nodeId="105690">
    <graphics y="-55.52920739113824" z="0.0" x="128.22678128878283"/>
  </node>
  <node id="139503" label="NEU3" cy:nodeId="105689">
    <graphics y="-230.14778344094293" z="0.0" x="71.69241468111682"/>
  </node>
  <node id="139499" label="COG5" cy:nodeId="105692">
    <graphics y="-110.78136650979059" z="0.0" x="83.5456327597301"/>
  </node>
  <node id="139500" label="ACER2" cy:nodeId="105691">
    <graphics y="-277.589449090357" z="0.0" x="44.75278226534533"/>
  </node>
  <node id="139501" label="MAN2A1" cy:nodeId="105694">
    <graphics y="-348.47107903420465" z="0.0" x="291.2189077536266"/>
  </node>
  <node id="139190" label="SLC35F5" cy:nodeId="105696">
    <graphics y="52.55478461325629" z="0.0" x="-548.1614328225453"/>
  </node>
  <node id="139489" label="SLC35A3" cy:nodeId="105695">
    <graphics y="3.082219915990663" z="0.0" x="31.029937187830683"/>
  </node>
  <node id="139265" label="ST8SIA6" cy:nodeId="105698">
    <graphics y="-567.555399102564" z="0.0" x="1254.556157509486"/>
  </node>
  <node id="139497" label="GALNT10" cy:nodeId="105697">
    <graphics y="-217.8518544858648" z="0.0" x="547.802983681361"/>
  </node>
  <node id="139453" label="RTF1" cy:nodeId="105700">
    <graphics y="-149.20964066445367" z="0.0" x="-158.62357576688123"/>
  </node>
  <node id="139490" label="SLC35A5" cy:nodeId="105702">
    <graphics y="-224.00679985939996" z="0.0" x="-182.19687898953748"/>
  </node>
  <node id="139491" label="ATF1" cy:nodeId="105701">
    <graphics y="-195.22743241250055" z="0.0" x="-121.15810640652967"/>
  </node>
  <node id="139493" label="GALNT4" cy:nodeId="105703">
    <graphics y="-367.02369133889215" z="0.0" x="-149.11942537625623"/>
  </node>
  <node id="139455" label="UGGT1" cy:nodeId="105705">
    <graphics y="-106.0890371030523" z="0.0" x="-43.321535666783575"/>
  </node>
  <node id="139481" label="ATF7IP" cy:nodeId="105710">
    <graphics y="-557.5510961240484" z="0.0" x="-484.8251291116078"/>
  </node>
  <node id="139174" label="HAS2" cy:nodeId="105709">
    <graphics y="-681.4143773740484" z="0.0" x="230.8322652975719"/>
  </node>
  <node id="139480" label="ALG10" cy:nodeId="105711">
    <graphics y="-184.39811531960504" z="0.0" x="-258.81994112332654"/>
  </node>
  <node id="139477" label="BACH1" cy:nodeId="105714">
    <graphics y="-497.988748711939" z="0.0" x="63.96807042757678"/>
  </node>
  <node id="139478" label="FKTN" cy:nodeId="105713">
    <graphics y="-70.46594445168512" z="0.0" x="-275.42129000027967"/>
  </node>
  <node id="139408" label="MAN1A1" cy:nodeId="105716">
    <graphics y="-372.6690618222906" z="0.0" x="996.1967214743297"/>
  </node>
  <node id="139345" label="CSGALNACT2" cy:nodeId="105715">
    <graphics y="-234.20068566262262" z="0.0" x="460.3185476462047"/>
  </node>
  <node id="139341" label="CHST11" cy:nodeId="105718">
    <graphics y="-59.0867406552984" z="0.0" x="775.2029470602672"/>
  </node>
  <node id="139495" label="CHSY1" cy:nodeId="105717">
    <graphics y="-274.07061211525934" z="0.0" x="398.49155179659533"/>
  </node>
  <node id="139359" label="ST6GAL2" cy:nodeId="105720">
    <graphics y="-812.0070287412359" z="0.0" x="910.8870290915172"/>
  </node>
  <node id="139363" label="GFPT2" cy:nodeId="105719">
    <graphics y="-845.5723973935796" z="0.0" x="804.514897743861"/>
  </node>
  <node id="139257" label="DPM3" cy:nodeId="105722">
    <graphics y="-484.2505590146734" z="0.0" x="-1379.840815146764"/>
  </node>
  <node id="139475" label="BATF" cy:nodeId="105721">
    <graphics y="-66.34713189064996" z="0.0" x="1038.6317800680797"/>
  </node>
  <node id="139472" label="MGAT1" cy:nodeId="105724">
    <graphics y="-110.11760537087457" z="0.0" x="1076.8372854391735"/>
  </node>
  <node id="139466" label="BATF3" cy:nodeId="105723">
    <graphics y="-166.34076504170434" z="0.0" x="1165.552495400111"/>
  </node>
  <node id="139464" label="BCAT1" cy:nodeId="105725">
    <graphics y="105.68431647360785" z="0.0" x="742.4579519430797"/>
  </node>
  <node id="139457" label="BRCA1" cy:nodeId="105728">
    <graphics y="-109.3959218686773" z="0.0" x="-344.21349581082654"/>
  </node>
  <node id="139454" label="ALG10B" cy:nodeId="105727">
    <graphics y="-235.62545220314996" z="0.0" x="-328.2802072366078"/>
  </node>
  <node id="139301" label="PIGN" cy:nodeId="105730">
    <graphics y="-1154.094919366236" z="0.0" x="-163.40658052762342"/>
  </node>
  <node id="139456" label="PIGW" cy:nodeId="105729">
    <graphics y="176.92543585837348" z="0.0" x="-435.54455049832654"/>
  </node>
  <node id="139488" label="SLC35E3" cy:nodeId="105732">
    <graphics y="22.796468573217226" z="0.0" x="-269.3342843850453"/>
  </node>
  <node id="139492" label="FAM20B" cy:nodeId="105731">
    <graphics y="199.83705695212348" z="0.0" x="-38.60920961697889"/>
  </node>
  <node id="139451" label="ALG12" cy:nodeId="105734">
    <graphics y="718.6518457704829" z="0.0" x="224.57309476534533"/>
  </node>
  <node id="139452" label="BRD1" cy:nodeId="105733">
    <graphics y="405.4221704775141" z="0.0" x="168.6137594381969"/>
  </node>
  <node id="139446" label="C17orf49" cy:nodeId="105736">
    <graphics y="-578.9052221006109" z="0.0" x="-1618.490473349889"/>
  </node>
  <node id="139482" label="PMM1" cy:nodeId="105735">
    <graphics y="1553.4489038759516" z="0.0" x="-1508.126719077428"/>
  </node>
  <node id="139444" label="CASP8AP2" cy:nodeId="105738">
    <graphics y="-291.6595861142828" z="0.0" x="-293.7724252541859"/>
  </node>
  <node id="139372" label="HYAL2" cy:nodeId="105737">
    <graphics y="219.6348169618891" z="0.0" x="745.050542275111"/>
  </node>
  <node id="139145" label="GALNS" cy:nodeId="105740">
    <graphics y="527.1993311220454" z="0.0" x="164.37418119112658"/>
  </node>
  <node id="139442" label="CBFB" cy:nodeId="105739">
    <graphics y="39.459798651342226" z="0.0" x="-140.48087557156873"/>
  </node>
  <node id="139439" label="CBX3" cy:nodeId="105741">
    <graphics y="575.6819971376704" z="0.0" x="-893.7015939553578"/>
  </node>
  <node id="139404" label="RFNG" cy:nodeId="105744">
    <graphics y="-61.94227044045465" z="0.0" x="-1349.2530465920765"/>
  </node>
  <node id="139460" label="MAN2A2" cy:nodeId="105748">
    <graphics y="223.45119269431098" z="0.0" x="258.4360250631969"/>
  </node>
  <node id="139268" label="ST3GAL3" cy:nodeId="105747">
    <graphics y="-576.6341649717046" z="0.0" x="-1258.1026559670765"/>
  </node>
  <node id="139212" label="IDUA" cy:nodeId="105749">
    <graphics y="-28.115991753931212" z="0.0" x="1510.9454397360485"/>
  </node>
  <node id="139445" label="B3GAT3" cy:nodeId="105754">
    <graphics y="-406.8274633115484" z="0.0" x="-1474.312006553014"/>
  </node>
  <node id="139429" label="CDK8" cy:nodeId="105756">
    <graphics y="-209.63232247292535" z="0.0" x="184.08159391085314"/>
  </node>
  <node id="139424" label="DPM2" cy:nodeId="105758">
    <graphics y="-114.8506337827398" z="0.0" x="-1213.740717490514"/>
  </node>
  <node id="139425" label="CDK9" cy:nodeId="105757">
    <graphics y="41.47763617575629" z="0.0" x="-1196.732172568639"/>
  </node>
  <node id="139423" label="MAN1B1" cy:nodeId="105760">
    <graphics y="139.59105475485785" z="0.0" x="-1212.8301950295765"/>
  </node>
  <node id="139403" label="PIGQ" cy:nodeId="105759">
    <graphics y="-339.1698400205328" z="0.0" x="-1362.430658896764"/>
  </node>
  <node id="139435" label="MOGS" cy:nodeId="105762">
    <graphics y="308.39415534079535" z="0.0" x="-798.7507882912953"/>
  </node>
  <node id="139127" label="POMT1" cy:nodeId="105761">
    <graphics y="-135.47107331215875" z="0.0" x="-1015.3348337014515"/>
  </node>
  <node id="139420" label="CEBPA" cy:nodeId="105764">
    <graphics y="1562.7464807802485" z="0.0" x="-1608.126719077428"/>
  </node>
  <node id="139140" label="CHST12" cy:nodeId="105763">
    <graphics y="645.8821924501704" z="0.0" x="610.3795828024547"/>
  </node>
  <node id="139328" label="MFNG" cy:nodeId="105766">
    <graphics y="-275.8728048032476" z="0.0" x="1013.2760671774547"/>
  </node>
  <node id="139418" label="CEBPB" cy:nodeId="105767">
    <graphics y="-469.6519262021734" z="0.0" x="-1699.480463584264"/>
  </node>
  <node id="139414" label="CHD2" cy:nodeId="105770">
    <graphics y="275.0275171572016" z="0.0" x="65.56360379854846"/>
  </node>
  <node id="139415" label="CHD1" cy:nodeId="105769">
    <graphics y="-399.62305657326715" z="0.0" x="79.48467389742541"/>
  </node>
  <node id="139266" label="NDST2" cy:nodeId="105772">
    <graphics y="-444.7139074033453" z="0.0" x="665.351811806361"/>
  </node>
  <node id="139413" label="OGT" cy:nodeId="105771">
    <graphics y="651.3141992861079" z="0.0" x="90.72736493746447"/>
  </node>
  <node id="139410" label="CHD8" cy:nodeId="105774">
    <graphics y="-163.96476106106775" z="0.0" x="-56.7399011452992"/>
  </node>
  <node id="139412" label="CHD4" cy:nodeId="105773">
    <graphics y="-295.2030736631109" z="0.0" x="-149.32226045926404"/>
  </node>
  <node id="139473" label="LAMP3" cy:nodeId="105776">
    <graphics y="-244.15919701516168" z="0.0" x="1195.2159475485485"/>
  </node>
  <node id="139409" label="CIITA" cy:nodeId="105775">
    <graphics y="-201.14880577981012" z="0.0" x="1336.3512014547985"/>
  </node>
  <node id="139310" label="MAN2B1" cy:nodeId="105777">
    <graphics y="-602.3058263486578" z="0.0" x="764.5658010641735"/>
  </node>
  <node id="139406" label="CPSF3L" cy:nodeId="105780">
    <graphics y="-159.98529593407648" z="0.0" x="-1403.507319053014"/>
  </node>
  <node id="139426" label="DSE" cy:nodeId="105779">
    <graphics y="-133.583044213648" z="0.0" x="335.89526883761096"/>
  </node>
  <node id="139401" label="B4GALT7" cy:nodeId="105782">
    <graphics y="-247.7219182676031" z="0.0" x="-1593.421137412389"/>
  </node>
  <node id="139405" label="B3GALT6" cy:nodeId="105781">
    <graphics y="-207.26135842263238" z="0.0" x="-1326.745112021764"/>
  </node>
  <node id="139276" label="B4GALNT4" cy:nodeId="105784">
    <graphics y="437.0065210634516" z="0.0" x="-335.20067842801404"/>
  </node>
  <node id="139258" label="POMGNT1" cy:nodeId="105783">
    <graphics y="-377.8258306211187" z="0.0" x="-695.4525094827015"/>
  </node>
  <node id="139398" label="CREB1" cy:nodeId="105785">
    <graphics y="276.7547205263422" z="0.0" x="-21.94855364163709"/>
  </node>
  <node id="139399" label="GMPPA" cy:nodeId="105787">
    <graphics y="-8.427057427759337" z="0.0" x="-1514.8138376077015"/>
  </node>
  <node id="139397" label="CREBBP" cy:nodeId="105790">
    <graphics y="-165.56526861845987" z="0.0" x="62.99718610445666"/>
  </node>
  <node id="139148" label="B4GALT3" cy:nodeId="105789">
    <graphics y="694.0711572939204" z="0.0" x="-85.43014772733045"/>
  </node>
  <node id="139447" label="POFUT1" cy:nodeId="105792">
    <graphics y="47.31900580466254" z="0.0" x="-86.80751283963514"/>
  </node>
  <node id="139163" label="COG7" cy:nodeId="105791">
    <graphics y="1562.7464807802485" z="0.0" x="-1807.6935449441273"/>
  </node>
  <node id="139390" label="E2F1" cy:nodeId="105796">
    <graphics y="-36.699930352564024" z="0.0" x="-1042.816645224889"/>
  </node>
  <node id="139392" label="DEK" cy:nodeId="105795">
    <graphics y="-348.6282140439703" z="0.0" x="-246.30129488309217"/>
  </node>
  <node id="139436" label="SLC35B1" cy:nodeId="105798">
    <graphics y="236.49721320212348" z="0.0" x="-803.7532296975453"/>
  </node>
  <node id="139389" label="ALG3" cy:nodeId="105797">
    <graphics y="195.22655280173285" z="0.0" x="-1073.278803428014"/>
  </node>
  <node id="139135" label="KHK" cy:nodeId="105800">
    <graphics y="451.0615747743891" z="0.0" x="-1314.1527047952015"/>
  </node>
  <node id="139438" label="DPM1" cy:nodeId="105799">
    <graphics y="754.5284326845454" z="0.0" x="-841.3442941506703"/>
  </node>
  <node id="139381" label="EBF1" cy:nodeId="105804">
    <graphics y="-114.03299157082574" z="0.0" x="682.729497353236"/>
  </node>
  <node id="139382" label="E2F7" cy:nodeId="105803">
    <graphics y="-88.89153496682184" z="0.0" x="-154.52547701199842"/>
  </node>
  <node id="139463" label="ST3GAL2" cy:nodeId="105806">
    <graphics y="-182.91498391091363" z="0.0" x="709.7650198141735"/>
  </node>
  <node id="139433" label="CSGALNACT1" cy:nodeId="105805">
    <graphics y="-315.4123479551031" z="0.0" x="669.8953909079235"/>
  </node>
  <node id="139231" label="B3GALT2" cy:nodeId="105808">
    <graphics y="-689.8558446592046" z="0.0" x="1218.040532509486"/>
  </node>
  <node id="139395" label="CHST3" cy:nodeId="105807">
    <graphics y="-182.99202935158746" z="0.0" x="430.5356802145641"/>
  </node>
  <node id="139462" label="FUT4" cy:nodeId="105810">
    <graphics y="67.74127753317816" z="0.0" x="558.3571218649547"/>
  </node>
  <node id="139280" label="TPST1" cy:nodeId="105809">
    <graphics y="261.84386237204535" z="0.0" x="649.8111013571422"/>
  </node>
  <node id="139458" label="GALNT12" cy:nodeId="105812">
    <graphics y="1002.7673853212641" z="0.0" x="453.1262563864391"/>
  </node>
  <node id="139494" label="AHR" cy:nodeId="106836">
    <graphics y="-2.4193822568608994" z="0.0" x="-200.62307222684217"/>
  </node>
  <node id="139173" label="PIGK" cy:nodeId="106835">
    <graphics y="210.7753198915766" z="0.0" x="-322.39675386746717"/>
  </node>
  <node id="139271" label="B3GNT2" cy:nodeId="106838">
    <graphics y="-1185.7500707334234" z="0.0" x="436.65390531222033"/>
  </node>
  <node id="139139" label="TPST2" cy:nodeId="106840">
    <graphics y="723.7001856142329" z="0.0" x="534.3306020895641"/>
  </node>
  <node id="139364" label="EGR2" cy:nodeId="105816">
    <graphics y="-437.50452629982965" z="0.0" x="764.1016287008922"/>
  </node>
  <node id="139380" label="ST6GALNAC3" cy:nodeId="105815">
    <graphics y="-355.4819738095953" z="0.0" x="738.128178993861"/>
  </node>
  <node id="139232" label="B3GALT1" cy:nodeId="105818">
    <graphics y="-782.5620214170171" z="0.0" x="1144.294438759486"/>
  </node>
  <node id="139449" label="SLC35E1" cy:nodeId="106844">
    <graphics y="542.1260278993891" z="0.0" x="-254.17751558621717"/>
  </node>
  <node id="139358" label="EHF" cy:nodeId="105819">
    <graphics y="870.1882837587641" z="0.0" x="152.58626310030627"/>
  </node>
  <node id="139450" label="BRD4" cy:nodeId="106843">
    <graphics y="219.14671881735785" z="0.0" x="-125.0250345071156"/>
  </node>
  <node id="139354" label="ELF1" cy:nodeId="105822">
    <graphics y="-441.21521965920465" z="0.0" x="11.524314324061152"/>
  </node>
  <node id="139427" label="COG6" cy:nodeId="105824">
    <graphics y="-273.7976094907476" z="0.0" x="333.15662137667346"/>
  </node>
  <node id="139430" label="CDK12" cy:nodeId="106848">
    <graphics y="236.7177027040766" z="0.0" x="172.0624441305797"/>
  </node>
  <node id="139428" label="COG3" cy:nodeId="105823">
    <graphics y="-502.4732152646734" z="0.0" x="172.3338522116344"/>
  </node>
  <node id="139434" label="CBX6" cy:nodeId="106847">
    <graphics y="-425.68384758889215" z="0.0" x="171.79776517550158"/>
  </node>
  <node id="139353" label="ELK3" cy:nodeId="105826">
    <graphics y="101.60451300681098" z="0.0" x="80.96992246309924"/>
  </node>
  <node id="139352" label="ELK4" cy:nodeId="105827">
    <graphics y="51.60556586325629" z="0.0" x="-2.8817697366077937"/>
  </node>
  <node id="139340" label="XYLT1" cy:nodeId="106854">
    <graphics y="-96.59874169289606" z="0.0" x="589.2084402243297"/>
  </node>
  <node id="139349" label="ERCC6" cy:nodeId="105830">
    <graphics y="-341.7554418271734" z="0.0" x="56.29279271761584"/>
  </node>
  <node id="139350" label="EP400" cy:nodeId="105829">
    <graphics y="-106.10451332985895" z="0.0" x="161.76736203829455"/>
  </node>
  <node id="139373" label="MAN1C1" cy:nodeId="106853">
    <graphics y="-179.32623593270318" z="0.0" x="874.9538015524547"/>
  </node>
  <node id="139347" label="ERG" cy:nodeId="105832">
    <graphics y="-352.6820775693609" z="0.0" x="610.5120901266735"/>
  </node>
  <node id="139474" label="FUCA1" cy:nodeId="106856">
    <graphics y="-121.52514473855035" z="0.0" x="947.1616872946422"/>
  </node>
  <node id="139348" label="ERF" cy:nodeId="105831">
    <graphics y="593.7806299501704" z="0.0" x="-997.4180856545765"/>
  </node>
  <node id="139467" label="ST6GAL1" cy:nodeId="106855">
    <graphics y="-147.06243340432184" z="0.0" x="822.5284475485485"/>
  </node>
  <node id="139471" label="ST8SIA4" cy:nodeId="105834">
    <graphics y="-215.08036248147027" z="0.0" x="1014.2445730368297"/>
  </node>
  <node id="139476" label="GCNT4" cy:nodeId="106858">
    <graphics y="-785.1916600888921" z="0.0" x="162.6001867453258"/>
  </node>
  <node id="139339" label="ST3GAL5" cy:nodeId="106857">
    <graphics y="-651.5714208310796" z="0.0" x="644.1557058493297"/>
  </node>
  <node id="139346" label="CHSY3" cy:nodeId="105833">
    <graphics y="-702.7767430967046" z="0.0" x="866.8983816305797"/>
  </node>
  <node id="139469" label="MGAT4A" cy:nodeId="106860">
    <graphics y="-226.80791298806207" z="0.0" x="949.7594656149547"/>
  </node>
  <node id="139282" label="CHST7" cy:nodeId="105835">
    <graphics y="686.3737085634516" z="0.0" x="756.1892751852672"/>
  </node>
  <node id="139344" label="SULT1C4" cy:nodeId="105837">
    <graphics y="-532.1433202451421" z="0.0" x="642.7686208883922"/>
  </node>
  <node id="139376" label="CHST15" cy:nodeId="106861">
    <graphics y="-155.19628159462945" z="0.0" x="499.05734769503283"/>
  </node>
  <node id="139305" label="GPI" cy:nodeId="106864">
    <graphics y="547.6162012392329" z="0.0" x="-1719.6260934670765"/>
  </node>
  <node id="139360" label="ST8SIA1" cy:nodeId="105840">
    <graphics y="-207.78502098977106" z="0.0" x="779.4747976462047"/>
  </node>
  <node id="139306" label="GAPDH" cy:nodeId="106863">
    <graphics y="621.6947534853266" z="0.0" x="-1859.760737021764"/>
  </node>
  <node id="139342" label="ETS1" cy:nodeId="105839">
    <graphics y="-247.02608696877496" z="0.0" x="590.030522743861"/>
  </node>
  <node id="139302" label="GRHL1" cy:nodeId="106866">
    <graphics y="-1331.202585381861" z="0.0" x="-273.4909005959828"/>
  </node>
  <node id="139337" label="HS3ST3B1" cy:nodeId="105841">
    <graphics y="-700.6568700498296" z="0.0" x="726.3477834860485"/>
  </node>
  <node id="139281" label="EXTL2" cy:nodeId="105844">
    <graphics y="101.38768561423285" z="0.0" x="180.88919583956408"/>
  </node>
  <node id="139485" label="MGAT2" cy:nodeId="106868">
    <graphics y="87.56236823142035" z="0.0" x="-211.1301828225453"/>
  </node>
  <node id="139272" label="HIF1A" cy:nodeId="106867">
    <graphics y="-937.2633153623296" z="0.0" x="398.5415395895641"/>
  </node>
  <node id="139361" label="ARSB" cy:nodeId="105843">
    <graphics y="-174.0215665525152" z="0.0" x="642.6588186422985"/>
  </node>
  <node id="139443" label="SLC35B4" cy:nodeId="105845">
    <graphics y="-140.85828415810602" z="0.0" x="121.84269467989611"/>
  </node>
  <node id="139259" label="IRF3" cy:nodeId="106872">
    <graphics y="-340.8640386289312" z="0.0" x="-1238.4449411233265"/>
  </node>
  <node id="139329" label="FLI1" cy:nodeId="105848">
    <graphics y="-250.38562218606012" z="0.0" x="833.6981252829235"/>
  </node>
  <node id="139260" label="IRF2" cy:nodeId="106871">
    <graphics y="-292.4200917905523" z="0.0" x="1327.2152151266735"/>
  </node>
  <node id="139330" label="FANCD2" cy:nodeId="105847">
    <graphics y="504.25194342673285" z="0.0" x="-675.252192099889"/>
  </node>
  <node id="139324" label="FOXA1" cy:nodeId="105850">
    <graphics y="1213.9186304384516" z="0.0" x="576.7631277243297"/>
  </node>
  <node id="139121" label="PIGH" cy:nodeId="105852">
    <graphics y="-65.32556359231012" z="0.0" x="-650.3904367287953"/>
  </node>
  <node id="139486" label="GLCE" cy:nodeId="105851">
    <graphics y="-497.0020543760015" z="0.0" x="-51.33583315213514"/>
  </node>
  <node id="139222" label="RPN2" cy:nodeId="105854">
    <graphics y="-451.0616857236578" z="0.0" x="-818.6101632912953"/>
  </node>
  <node id="139228" label="MEIS3" cy:nodeId="106878">
    <graphics y="-368.01546685158746" z="0.0" x="842.7249197165172"/>
  </node>
  <node id="139317" label="FOXM1" cy:nodeId="105853">
    <graphics y="90.56322272360785" z="0.0" x="-424.4969125588734"/>
  </node>
  <node id="139314" label="FOXO1" cy:nodeId="105856">
    <graphics y="-283.926851434107" z="0.0" x="618.3048147360485"/>
  </node>
  <node id="139291" label="ALG6" cy:nodeId="106879">
    <graphics y="1014.3250025087641" z="0.0" x="-355.62182100613904"/>
  </node>
  <node id="139316" label="GNPNAT1" cy:nodeId="105855">
    <graphics y="272.39635260642035" z="0.0" x="-557.2393136819203"/>
  </node>
  <node id="139308" label="FOXP3" cy:nodeId="105858">
    <graphics y="-112.25629250466363" z="0.0" x="870.373052040736"/>
  </node>
  <node id="139484" label="GFPT1" cy:nodeId="106882">
    <graphics y="98.4304712587641" z="0.0" x="-55.442438681920294"/>
  </node>
  <node id="139204" label="PPARA" cy:nodeId="106881">
    <graphics y="-518.693582696314" z="0.0" x="315.66040555636096"/>
  </node>
  <node id="139313" label="DSEL" cy:nodeId="105857">
    <graphics y="-552.6434117978765" z="0.0" x="857.559087196986"/>
  </node>
  <node id="139362" label="SULF1" cy:nodeId="106883">
    <graphics y="-279.3381749814703" z="0.0" x="752.2035574118297"/>
  </node>
  <node id="139465" label="HK3" cy:nodeId="105859">
    <graphics y="-237.76141564309137" z="0.0" x="1097.207524696986"/>
  </node>
  <node id="139185" label="SIRT6" cy:nodeId="106885">
    <graphics y="-287.6155263608648" z="0.0" x="-1307.436029990514"/>
  </node>
  <node id="139378" label="EXTL1" cy:nodeId="106887">
    <graphics y="-530.6728612607671" z="0.0" x="739.9336599508922"/>
  </node>
  <node id="139136" label="THAP11" cy:nodeId="106890">
    <graphics y="303.7785242372797" z="0.0" x="-1110.728510459264"/>
  </node>
  <node id="139299" label="GTF2B" cy:nodeId="105868">
    <graphics y="1562.7464807802485" z="0.0" x="-1009.4262414773304"/>
  </node>
  <node id="139383" label="COG4" cy:nodeId="106892">
    <graphics y="406.59020026267035" z="0.0" x="-1153.2752633889515"/>
  </node>
  <node id="139159" label="COG8" cy:nodeId="106891">
    <graphics y="145.6388452822016" z="0.0" x="-859.9112497170765"/>
  </node>
  <node id="139315" label="ALG1" cy:nodeId="105867">
    <graphics y="57.417623358373476" z="0.0" x="-717.2930856545765"/>
  </node>
  <node id="139416" label="STT3A" cy:nodeId="106893">
    <graphics y="-326.0214788144781" z="0.0" x="-65.01973970731092"/>
  </node>
  <node id="139296" label="H2AFX" cy:nodeId="105872">
    <graphics y="-274.99842278420465" z="0.0" x="-892.4400583108265"/>
  </node>
  <node id="139293" label="PIGO" cy:nodeId="105874">
    <graphics y="-585.654520196314" z="0.0" x="-346.83852632840467"/>
  </node>
  <node id="139294" label="HCFC1" cy:nodeId="105873">
    <graphics y="-131.10862938820856" z="0.0" x="-110.70223482449842"/>
  </node>
  <node id="139285" label="HES4" cy:nodeId="105876">
    <graphics y="1553.4489038759516" z="0.0" x="-909.4262414773304"/>
  </node>
  <node id="139286" label="HECTD1" cy:nodeId="105875">
    <graphics y="558.3579614931391" z="0.0" x="-131.13210542996717"/>
  </node>
  <node id="139295" label="DPAGT1" cy:nodeId="105878">
    <graphics y="-327.7158452695562" z="0.0" x="-484.90868624051404"/>
  </node>
  <node id="139402" label="TSTA3" cy:nodeId="105880">
    <graphics y="-252.93196312844293" z="0.0" x="-1410.546381553014"/>
  </node>
  <node id="139270" label="HSF1" cy:nodeId="105879">
    <graphics y="-327.8710881894781" z="0.0" x="-1158.334223349889"/>
  </node>
  <node id="139267" label="IKZF1" cy:nodeId="105882">
    <graphics y="-331.2526036924078" z="0.0" x="947.2167410055797"/>
  </node>
  <node id="139269" label="GPAA1" cy:nodeId="105881">
    <graphics y="-422.47754876076715" z="0.0" x="-1310.2344919045765"/>
  </node>
  <node id="139377" label="LIPA" cy:nodeId="105884">
    <graphics y="-284.77508751809137" z="0.0" x="872.3956960837047"/>
  </node>
  <node id="139263" label="INO80" cy:nodeId="105885">
    <graphics y="-430.6316930478765" z="0.0" x="-475.83764131863904"/>
  </node>
  <node id="139256" label="IRF4" cy:nodeId="105888">
    <graphics y="-179.1098987287237" z="0.0" x="933.0651296774547"/>
  </node>
  <node id="139262" label="IRF1" cy:nodeId="105887">
    <graphics y="-215.48388497292535" z="0.0" x="1255.350346962611"/>
  </node>
  <node id="139255" label="IRF8" cy:nodeId="105890">
    <graphics y="-174.04889695107477" z="0.0" x="1065.1353811422985"/>
  </node>
  <node id="139254" label="JMJD1C" cy:nodeId="105892">
    <graphics y="-193.74521462380426" z="0.0" x="303.3428396383922"/>
  </node>
  <node id="139253" label="JMJD6" cy:nodeId="105894">
    <graphics y="68.85078986227973" z="0.0" x="-1090.1177926858265"/>
  </node>
  <node id="139338" label="MGAT5" cy:nodeId="105893">
    <graphics y="-273.11897484719293" z="0.0" x="266.42339078585314"/>
  </node>
  <node id="139468" label="GBGT1" cy:nodeId="105897">
    <graphics y="-24.479456109399962" z="0.0" x="830.0209402243297"/>
  </node>
  <node id="139250" label="GNB1" cy:nodeId="105902">
    <graphics y="-71.76011864602106" z="0.0" x="-466.85729463895154"/>
  </node>
  <node id="139252" label="KDM1A" cy:nodeId="105901">
    <graphics y="249.42235358298285" z="0.0" x="-688.2203927834828"/>
  </node>
  <node id="139247" label="KDM5A" cy:nodeId="105904">
    <graphics y="-233.20579735695856" z="0.0" x="-67.63856752713514"/>
  </node>
  <node id="139248" label="KDM3A" cy:nodeId="105903">
    <graphics y="345.9007776552485" z="0.0" x="266.03572599093127"/>
  </node>
  <node id="139487" label="HS2ST1" cy:nodeId="105906">
    <graphics y="-66.81250206887262" z="0.0" x="-209.93245943387342"/>
  </node>
  <node id="139393" label="GNS" cy:nodeId="105905">
    <graphics y="-204.67492882668512" z="0.0" x="377.88635770479846"/>
  </node>
  <node id="139448" label="B3GALNT2" cy:nodeId="105908">
    <graphics y="185.67641242087348" z="0.0" x="-192.5655618508656"/>
  </node>
  <node id="139246" label="KDM5B" cy:nodeId="105907">
    <graphics y="516.5132349306391" z="0.0" x="37.568136374155756"/>
  </node>
  <node id="139307" label="RENBP" cy:nodeId="105912">
    <graphics y="50.93781073630316" z="0.0" x="1041.4185232321422"/>
  </node>
  <node id="139326" label="CHST13" cy:nodeId="105913">
    <graphics y="-469.2433263486578" z="0.0" x="1180.4766897360485"/>
  </node>
  <node id="139400" label="B4GALT2" cy:nodeId="105917">
    <graphics y="-212.51587502419488" z="0.0" x="-1225.541987021764"/>
  </node>
  <node id="139356" label="ST6GALNAC1" cy:nodeId="105920">
    <graphics y="1177.0477808290766" z="0.0" x="337.1187185446422"/>
  </node>
  <node id="139236" label="MED1" cy:nodeId="105924">
    <graphics y="160.03066046774848" z="0.0" x="129.79414121309924"/>
  </node>
  <node id="139129" label="NDST1" cy:nodeId="105923">
    <graphics y="-812.0647679990484" z="0.0" x="618.614262978236"/>
  </node>
  <node id="139234" label="MEF2C" cy:nodeId="105926">
    <graphics y="-449.2023107236578" z="0.0" x="853.9168752829235"/>
  </node>
  <node id="139235" label="MEF2A" cy:nodeId="105925">
    <graphics y="-372.05005852639215" z="0.0" x="133.4889578024547"/>
  </node>
  <node id="139479" label="AUTS2" cy:nodeId="107973">
    <graphics y="-197.45618454873102" z="0.0" x="-576.1791330178578"/>
  </node>
  <node id="139374" label="FUT8" cy:nodeId="107976">
    <graphics y="-272.62410180031793" z="0.0" x="534.1158498922985"/>
  </node>
  <node id="139233" label="SLC35F1" cy:nodeId="105927">
    <graphics y="-714.4759618467046" z="0.0" x="1010.439946571986"/>
  </node>
  <node id="139431" label="CHST6" cy:nodeId="105930">
    <graphics y="-838.2550145810796" z="0.0" x="276.1040701071422"/>
  </node>
  <node id="139124" label="SLC35F2" cy:nodeId="107979">
    <graphics y="374.0247095400141" z="0.0" x="73.01733915011096"/>
  </node>
  <node id="139227" label="MRE11A" cy:nodeId="105931">
    <graphics y="-473.4394017881109" z="0.0" x="-369.26281221707654"/>
  </node>
  <node id="139224" label="MYBL1" cy:nodeId="105934">
    <graphics y="-16.7822972959234" z="0.0" x="342.2953237692516"/>
  </node>
  <node id="139387" label="RPN1" cy:nodeId="105936">
    <graphics y="136.69460089743598" z="0.0" x="-713.9549508889515"/>
  </node>
  <node id="139223" label="MYBL2" cy:nodeId="105935">
    <graphics y="-31.575159234399962" z="0.0" x="-743.1293283303578"/>
  </node>
  <node id="139225" label="B3GNT8" cy:nodeId="107983">
    <graphics y="1553.4489038759516" z="0.0" x="-1308.559893210729"/>
  </node>
  <node id="139388" label="SLC35C2" cy:nodeId="107986">
    <graphics y="-394.3153325742437" z="0.0" x="-1020.458490928014"/>
  </node>
  <node id="139384" label="E2F4" cy:nodeId="107987">
    <graphics y="299.1510828310297" z="0.0" x="-903.2660470803578"/>
  </node>
  <node id="139369" label="ST6GALNAC5" cy:nodeId="107989">
    <graphics y="234.8052271181391" z="0.0" x="887.6093191305797"/>
  </node>
  <node id="139218" label="NFATC1" cy:nodeId="105944">
    <graphics y="-580.8300878232671" z="0.0" x="981.3155569235485"/>
  </node>
  <node id="139298" label="ALG14" cy:nodeId="107992">
    <graphics y="1553.4489038759516" z="0.0" x="-1108.9930673440297"/>
  </node>
  <node id="139217" label="NFIC" cy:nodeId="105945">
    <graphics y="-116.68198601662652" z="0.0" x="399.9699148337047"/>
  </node>
  <node id="139274" label="HEYL" cy:nodeId="107993">
    <graphics y="-735.6429540342046" z="0.0" x="535.4433035055797"/>
  </node>
  <node id="139214" label="NPAT" cy:nodeId="105948">
    <graphics y="-351.69080559670465" z="0.0" x="-369.40746553738904"/>
  </node>
  <node id="139216" label="NIPBL" cy:nodeId="105947">
    <graphics y="-11.722025079126524" z="0.0" x="-30.232859214146856"/>
  </node>
  <node id="139277" label="ST3GAL4" cy:nodeId="107998">
    <graphics y="518.8516138368891" z="0.0" x="788.5175222555797"/>
  </node>
  <node id="139496" label="SLC35D1" cy:nodeId="105950">
    <graphics y="-414.0255071347906" z="0.0" x="258.1731313864391"/>
  </node>
  <node id="139391" label="GALNT3" cy:nodeId="108000">
    <graphics y="-405.72393242775934" z="0.0" x="-68.48128755887342"/>
  </node>
  <node id="139322" label="B3GNT6" cy:nodeId="107999">
    <graphics y="1382.5548609072016" z="0.0" x="533.3778433005016"/>
  </node>
  <node id="139394" label="PIGM" cy:nodeId="105954">
    <graphics y="-126.4887410825445" z="0.0" x="-212.46285494168592"/>
  </node>
  <node id="139422" label="NANS" cy:nodeId="108002">
    <graphics y="-93.54136101662652" z="0.0" x="-1135.452875693639"/>
  </node>
  <node id="139289" label="SLC35A1" cy:nodeId="108001">
    <graphics y="805.8432520204829" z="0.0" x="-519.5657907327015"/>
  </node>
  <node id="139264" label="B3GNT7" cy:nodeId="108004">
    <graphics y="-523.2586766904546" z="0.0" x="1348.5802053610485"/>
  </node>
  <node id="139211" label="PCGF1" cy:nodeId="105955">
    <graphics y="-31.594095391626524" z="0.0" x="-1723.045404990514"/>
  </node>
  <node id="139321" label="GCNT3" cy:nodeId="108003">
    <graphics y="1453.4489038759516" z="0.0" x="635.3616995016735"/>
  </node>
  <node id="139209" label="PIAS1" cy:nodeId="105958">
    <graphics y="-341.2574865049078" z="0.0" x="-3.819967826207403"/>
  </node>
  <node id="139311" label="SLC17A5" cy:nodeId="108005">
    <graphics y="76.47629340231879" z="0.0" x="644.3756155172985"/>
  </node>
  <node id="139193" label="DAD1" cy:nodeId="108008">
    <graphics y="160.01473029196723" z="0.0" x="-1559.6903024514515"/>
  </node>
  <node id="139205" label="POLR3A" cy:nodeId="105960">
    <graphics y="-261.0029470151617" z="0.0" x="198.3624929587047"/>
  </node>
  <node id="139207" label="POLR2B" cy:nodeId="105959">
    <graphics y="118.88658698142035" z="0.0" x="-275.07262667020154"/>
  </node>
  <node id="139273" label="CHPF2" cy:nodeId="108007">
    <graphics y="-655.1115209287359" z="0.0" x="127.26584378878283"/>
  </node>
  <node id="139203" label="PRDM1" cy:nodeId="105962">
    <graphics y="-900.1186620420171" z="0.0" x="136.67329160372424"/>
  </node>
  <node id="139221" label="MYC" cy:nodeId="108009">
    <graphics y="350.96336920798285" z="0.0" x="-641.2413278420765"/>
  </node>
  <node id="139385" label="UGGT2" cy:nodeId="105966">
    <graphics y="135.9574487978266" z="0.0" x="249.1430563131969"/>
  </node>
  <node id="139202" label="RB1" cy:nodeId="105965">
    <graphics y="-323.67037407814996" z="0.0" x="161.25669614473986"/>
  </node>
  <node id="139278" label="CHST10" cy:nodeId="108013">
    <graphics y="406.04405768454535" z="0.0" x="773.7891897360485"/>
  </node>
  <node id="139215" label="NOTCH1" cy:nodeId="108016">
    <graphics y="-386.7469884580328" z="0.0" x="1265.1287893454235"/>
  </node>
  <node id="139201" label="RBBP5" cy:nodeId="105967">
    <graphics y="-50.77874199807184" z="0.0" x="-74.20205171902967"/>
  </node>
  <node id="139459" label="B4GALNT3" cy:nodeId="108015">
    <graphics y="655.6359766298579" z="0.0" x="416.8191274801891"/>
  </node>
  <node id="139197" label="REST" cy:nodeId="105970">
    <graphics y="-477.56604973732965" z="0.0" x="-137.11522920926404"/>
  </node>
  <node id="139370" label="CHST14" cy:nodeId="108018">
    <graphics y="117.91902716696723" z="0.0" x="466.8042654196422"/>
  </node>
  <node id="139199" label="RCOR1" cy:nodeId="105969">
    <graphics y="235.80711920798285" z="0.0" x="353.29175321261096"/>
  </node>
  <node id="139195" label="RFX7" cy:nodeId="105974">
    <graphics y="-590.3099462217046" z="0.0" x="-125.43674715359998"/>
  </node>
  <node id="139200" label="RBL1" cy:nodeId="108022">
    <graphics y="280.1462000185297" z="0.0" x="488.5730642477672"/>
  </node>
  <node id="139206" label="COG2" cy:nodeId="105973">
    <graphics y="332.95396979392035" z="0.0" x="-316.66283663113904"/>
  </node>
  <node id="139198" label="RELA" cy:nodeId="108024">
    <graphics y="-603.2092992490484" z="0.0" x="-223.90346773465467"/>
  </node>
  <node id="139183" label="POMT2" cy:nodeId="108023">
    <graphics y="-551.1652318662359" z="0.0" x="-598.834711631139"/>
  </node>
  <node id="139191" label="RNF2" cy:nodeId="105975">
    <graphics y="100.52684577048285" z="0.0" x="-139.5525461037953"/>
  </node>
  <node id="139189" label="RUNX1" cy:nodeId="105978">
    <graphics y="-80.3667470639898" z="0.0" x="506.48828641573596"/>
  </node>
  <node id="139166" label="SRC" cy:nodeId="108028">
    <graphics y="-657.9771520322515" z="0.0" x="-678.7159372170765"/>
  </node>
  <node id="139229" label="ST8SIA2" cy:nodeId="105980">
    <graphics y="-819.5592748349859" z="0.0" x="1038.8779958883922"/>
  </node>
  <node id="139336" label="SULF2" cy:nodeId="105979">
    <graphics y="-344.20537774025934" z="0.0" x="461.26624051729846"/>
  </node>
  <node id="139150" label="TBP" cy:nodeId="108030">
    <graphics y="506.4296167665766" z="0.0" x="-573.572504599889"/>
  </node>
  <node id="139187" label="RUNX3" cy:nodeId="105982">
    <graphics y="73.22730048239691" z="0.0" x="843.7371267477672"/>
  </node>
  <node id="139188" label="RUNX2" cy:nodeId="105981">
    <graphics y="-47.57087914406793" z="0.0" x="454.79819242159533"/>
  </node>
  <node id="139172" label="B3GNT9" cy:nodeId="108032">
    <graphics y="-730.2868749326421" z="0.0" x="-50.82182558377576"/>
  </node>
  <node id="139184" label="SIX5" cy:nodeId="105986">
    <graphics y="-512.2065831845953" z="0.0" x="-1026.462885459264"/>
  </node>
  <node id="139498" label="UGCG" cy:nodeId="105985">
    <graphics y="-550.011697930689" z="0.0" x="104.9111990133922"/>
  </node>
  <node id="139176" label="SMC3" cy:nodeId="105990">
    <graphics y="-95.67261712014215" z="0.0" x="2.2261709372203313"/>
  </node>
  <node id="139177" label="SMC1A" cy:nodeId="105989">
    <graphics y="-191.80303399025934" z="0.0" x="131.09908048311877"/>
  </node>
  <node id="139119" label="ZBTB2" cy:nodeId="108039">
    <graphics y="437.6647241884516" z="0.0" x="-61.96659334500623"/>
  </node>
  <node id="139164" label="SRCAP" cy:nodeId="105994">
    <graphics y="1553.4489038759516" z="0.0" x="-1907.2603708108265"/>
  </node>
  <node id="139162" label="SRF" cy:nodeId="105996">
    <graphics y="588.8799341493891" z="0.0" x="-33.605600913365606"/>
  </node>
  <node id="139432" label="GANAB" cy:nodeId="105998">
    <graphics y="-55.512437981958556" z="0.0" x="-22.7453943093617"/>
  </node>
  <node id="139161" label="SSRP1" cy:nodeId="105997">
    <graphics y="170.09786017477973" z="0.0" x="-626.7589059670765"/>
  </node>
  <node id="139355" label="HPSE" cy:nodeId="106000">
    <graphics y="1172.8702905947016" z="0.0" x="172.8162740866344"/>
  </node>
  <node id="139158" label="STAT1" cy:nodeId="105999">
    <graphics y="-332.6135503476812" z="0.0" x="1171.8717092672985"/>
  </node>
  <node id="139154" label="STAT4" cy:nodeId="106002">
    <graphics y="-55.788309258814024" z="0.0" x="949.8488210837047"/>
  </node>
  <node id="139157" label="STAT2" cy:nodeId="106001">
    <graphics y="-341.453104180689" z="0.0" x="1091.417729775111"/>
  </node>
  <node id="139152" label="STAT5A" cy:nodeId="106003">
    <graphics y="-125.92254845559137" z="0.0" x="1009.4196218649547"/>
  </node>
  <node id="139411" label="COG1" cy:nodeId="106005">
    <graphics y="-416.96453301369684" z="0.0" x="-304.1320138772328"/>
  </node>
  <node id="139147" label="TCF7" cy:nodeId="106008">
    <graphics y="-131.24643532692926" z="0.0" x="723.4988454977672"/>
  </node>
  <node id="139146" label="TCF7L1" cy:nodeId="106009">
    <graphics y="178.68507941306098" z="0.0" x="60.78284398714709"/>
  </node>
  <node id="139144" label="TEAD1" cy:nodeId="106013">
    <graphics y="-218.44487587868707" z="0.0" x="260.8965505758922"/>
  </node>
  <node id="139138" label="TET2" cy:nodeId="106016">
    <graphics y="-585.4452611631109" z="0.0" x="-22.42505510648084"/>
  </node>
  <node id="139133" label="TRIM28" cy:nodeId="106018">
    <graphics y="417.74950202048285" z="0.0" x="-1484.0479684670765"/>
  </node>
  <node id="139134" label="TP63" cy:nodeId="106017">
    <graphics y="344.6086939150141" z="0.0" x="-200.1413675149281"/>
  </node>
  <node id="139132" label="TTF2" cy:nodeId="106019">
    <graphics y="-32.65320794045465" z="0.0" x="-128.0147806008656"/>
  </node>
  <node id="139128" label="WDR5" cy:nodeId="106024">
    <graphics y="34.257284002904726" z="0.0" x="-933.5430856545765"/>
  </node>
  <node id="139123" label="YAP1" cy:nodeId="106026">
    <graphics y="-82.93421379982965" z="0.0" x="-836.0096994241078"/>
  </node>
  <node id="139125" label="XRN2" cy:nodeId="106025">
    <graphics y="-56.45632378518121" z="0.0" x="39.95527640978503"/>
  </node>
  <node id="139122" label="YY1" cy:nodeId="106028">
    <graphics y="89.87550910056098" z="0.0" x="-350.78847750027967"/>
  </node>
  <node id="139143" label="GALNT5" cy:nodeId="106027">
    <graphics y="-578.6748754209234" z="0.0" x="410.46936551729846"/>
  </node>
  <node id="139120" label="ZBTB17" cy:nodeId="106029">
    <graphics y="-207.57449547707574" z="0.0" x="-1510.106440146764"/>
  </node>
  <node id="139117" label="C1GALT1C1" cy:nodeId="106032">
    <graphics y="-462.9509679502203" z="0.0" x="-578.7712961037953"/>
  </node>
  <node id="139118" label="ZBTB33" cy:nodeId="106031">
    <graphics y="-269.700662774439" z="0.0" x="-236.18728121121717"/>
  </node>
  <node id="139335" label="B4GALT1" cy:nodeId="107274">
    <graphics y="-476.7639562314703" z="0.0" x="563.147221962611"/>
  </node>
  <node id="139461" label="BCL6" cy:nodeId="107275">
    <graphics y="586.4330347353266" z="0.0" x="293.53857938448596"/>
  </node>
  <node id="139396" label="FUT10" cy:nodeId="107278">
    <graphics y="-269.12159172951715" z="0.0" x="-25.76505525906873"/>
  </node>
  <node id="139441" label="B4GALT5" cy:nodeId="107279">
    <graphics y="-12.798441094751524" z="0.0" x="226.49629727999377"/>
  </node>
  <node id="139149" label="SLC35B3" cy:nodeId="107281">
    <graphics y="755.8600977236079" z="0.0" x="-679.910639365514"/>
  </node>
  <node id="139386" label="E2F3" cy:nodeId="107284">
    <graphics y="148.30843146384223" z="0.0" x="-99.80842073758436"/>
  </node>
  <node id="139160" label="ALG8" cy:nodeId="107286">
    <graphics y="432.00841315329535" z="0.0" x="-797.4732614358265"/>
  </node>
  <node id="139366" label="EED" cy:nodeId="107285">
    <graphics y="443.9908960634516" z="0.0" x="946.786626259486"/>
  </node>
  <node id="139357" label="FUT2" cy:nodeId="107287">
    <graphics y="1048.3727320009516" z="0.0" x="96.9416174093883"/>
  </node>
  <node id="139155" label="ASAH1" cy:nodeId="107290">
    <graphics y="-799.2296849912359" z="0.0" x="50.13207284609484"/>
  </node>
  <node id="139320" label="FUT3" cy:nodeId="107289">
    <graphics y="1351.392385321264" z="0.0" x="708.0612234274547"/>
  </node>
  <node id="139181" label="PAPSS1" cy:nodeId="107291">
    <graphics y="-191.091100854273" z="0.0" x="-694.2846017678578"/>
  </node>
  <node id="139323" label="GCNT2" cy:nodeId="107296">
    <graphics y="849.7444361025141" z="0.0" x="659.4614919821422"/>
  </node>
  <node id="139325" label="FOSL2" cy:nodeId="107295">
    <graphics y="-151.44055478035943" z="0.0" x="207.82326261202502"/>
  </node>
  <node id="139318" label="FOXK1" cy:nodeId="107298">
    <graphics y="444.9257105165766" z="0.0" x="-180.21833284695936"/>
  </node>
  <node id="139297" label="GTF3C2" cy:nodeId="107302">
    <graphics y="-433.1748449033453" z="0.0" x="-208.3114572366078"/>
  </node>
  <node id="139300" label="GRHL2" cy:nodeId="107301">
    <graphics y="132.42397101462348" z="0.0" x="-511.8811593850453"/>
  </node>
  <node id="139288" label="HDAC3" cy:nodeId="107304">
    <graphics y="1553.4489038759516" z="0.0" x="-709.8594156106312"/>
  </node>
  <node id="139292" label="HDAC1" cy:nodeId="107303">
    <graphics y="781.4769190126704" z="0.0" x="-306.60866792996717"/>
  </node>
  <node id="139332" label="GALNT2" cy:nodeId="107306">
    <graphics y="-23.798059625024962" z="0.0" x="626.3347829977672"/>
  </node>
  <node id="139287" label="GNPDA1" cy:nodeId="107305">
    <graphics y="1562.7464807802485" z="0.0" x="-610.292589743932"/>
  </node>
  <node id="139334" label="EXT2" cy:nodeId="107307">
    <graphics y="-613.4257299131109" z="0.0" x="551.0551199118297"/>
  </node>
  <node id="139470" label="NAAA" cy:nodeId="107310">
    <graphics y="-9.265604180689024" z="0.0" x="1109.3446096579235"/>
  </node>
  <node id="139245" label="KDM5C" cy:nodeId="107314">
    <graphics y="-313.1226751035406" z="0.0" x="-571.0306955178578"/>
  </node>
  <node id="139249" label="KDM2B" cy:nodeId="107313">
    <graphics y="11.862752752904726" z="0.0" x="-460.0207162698109"/>
  </node>
  <node id="139244" label="KLF11" cy:nodeId="107316">
    <graphics y="33.953450995092226" z="0.0" x="145.47285977999377"/>
  </node>
  <node id="139242" label="KLF5" cy:nodeId="107318">
    <graphics y="1298.0717066103266" z="0.0" x="245.23367826143908"/>
  </node>
  <node id="139243" label="KLF4" cy:nodeId="107317">
    <graphics y="862.0151880556391" z="0.0" x="454.56287137667346"/>
  </node>
  <node id="139238" label="MBD2" cy:nodeId="107322">
    <graphics y="-1364.3089086240484" z="0.0" x="-145.23929842313123"/>
  </node>
  <node id="139241" label="LIN9" cy:nodeId="107321">
    <graphics y="-260.24286095559137" z="0.0" x="-407.0437570412953"/>
  </node>
  <node id="139237" label="MBD3" cy:nodeId="107323">
    <graphics y="-324.6609594052984" z="0.0" x="-1465.0255075295765"/>
  </node>
  <node id="139220" label="NCOR2" cy:nodeId="107326">
    <graphics y="-80.20757500588434" z="0.0" x="311.12109891573596"/>
  </node>
  <node id="139379" label="PAPSS2" cy:nodeId="107328">
    <graphics y="-249.99871270119684" z="0.0" x="691.3356374899547"/>
  </node>
  <node id="139279" label="POFUT2" cy:nodeId="107327">
    <graphics y="174.40334113181098" z="0.0" x="416.98837796847033"/>
  </node>
  <node id="139142" label="B4GALT6" cy:nodeId="107331">
    <graphics y="-667.6743261045171" z="0.0" x="353.5497488180797"/>
  </node>
  <node id="139208" label="PML" cy:nodeId="107336">
    <graphics y="-78.88149468361871" z="0.0" x="1296.729253212611"/>
  </node>
  <node id="139192" label="RLF" cy:nodeId="107337">
    <graphics y="-767.9714452451421" z="0.0" x="-291.60085542996717"/>
  </node>
  <node id="139182" label="SMAD1" cy:nodeId="107341">
    <graphics y="-30.34803215920465" z="0.0" x="-345.43422945340467"/>
  </node>
  <node id="139180" label="SMARCA4" cy:nodeId="107343">
    <graphics y="571.7753809267329" z="0.0" x="-373.91771944363904"/>
  </node>
  <node id="139170" label="SOX2" cy:nodeId="107345">
    <graphics y="946.6465357118891" z="0.0" x="743.7092947165172"/>
  </node>
  <node id="139156" label="STAT3" cy:nodeId="107347">
    <graphics y="-552.5774327939703" z="0.0" x="229.86745206515002"/>
  </node>
  <node id="139116" label="LAMP2" cy:nodeId="107350">
    <graphics y="-681.7670995420171" z="0.0" x="-447.9185129006703"/>
  </node>
  <node id="139151" label="SVIL" cy:nodeId="107349">
    <graphics y="355.2721460634516" z="0.0" x="387.2963003317516"/>
  </node>
  <node id="139130" label="VDR" cy:nodeId="107356">
    <graphics y="-365.506570977564" z="0.0" x="540.812749306361"/>
  </node>
</graph>
