# Supplementary material for: A systems-based framework to computationally describe putative transcription factors and signaling pathways regulating glycan biosynthesis
Source: publisher site journal article supplement (doi:10.3762/bjoc.17.119), 2021-07-22
Supplement: Additional file 2 [file 1860-5397-17-119-S2.cys › CytoscapeSession-2021_03_21-12_01/views/110777-155206-KICH.xgmml]

<?xml version="1.0" encoding="UTF-8" standalone="yes"?>
<graph id="155206" label="KICH" cy:view="1" cy:networkId="110777" cy:visualStyle="default" cy:rendererId="org.cytoscape.ding" cy:documentVersion="3.0" xmlns:dc="http://purl.org/dc/elements/1.1/" xmlns:xlink="http://www.w3.org/1999/xlink" xmlns:rdf="http://www.w3.org/1999/02/22-rdf-syntax-ns#" xmlns:cy="http://www.cytoscape.org" xmlns="http://www.cs.rpi.edu/XGMML">
  <graphics>
    <att name="NETWORK_NODE_SELECTION" value="true" type="string" cy:type="String"/>
    <att name="NETWORK_CENTER_X_LOCATION" value="293.50457763671875" type="string" cy:type="String"/>
    <att name="NETWORK_HEIGHT" value="510.0" type="string" cy:type="String"/>
    <att name="NETWORK_TITLE" value="KICH" type="string" cy:type="String"/>
    <att name="NETWORK_EDGE_SELECTION" value="true" type="string" cy:type="String"/>
    <att name="NETWORK_CENTER_Y_LOCATION" value="109.547607421875" type="string" cy:type="String"/>
    <att name="NETWORK_WIDTH" value="1312.0" type="string" cy:type="String"/>
    <att name="NETWORK_DEPTH" value="0.0" type="string" cy:type="String"/>
    <att name="NETWORK_SCALE_FACTOR" value="0.10406583415251887" type="string" cy:type="String"/>
    <att name="NETWORK_ANNOTATION_SELECTION" value="false" type="string" cy:type="String"/>
    <att name="NETWORK_CENTER_Z_LOCATION" value="0.0" type="string" cy:type="String"/>
  </graphics>
  <node id="155238" label="RBL2" cy:nodeId="105968">
    <graphics y="-1267.9351346348271" z="0.0" x="91.40602431875277"/>
  </node>
  <node id="155319" label="B4GALNT3" cy:nodeId="108015">
    <graphics y="338.7417185451045" z="0.0" x="297.16954360586215"/>
  </node>
  <node id="155240" label="RBBP5" cy:nodeId="105967">
    <graphics y="-1412.1128499363408" z="0.0" x="102.8519776878934"/>
  </node>
  <node id="155387" label="FPGT" cy:nodeId="105976">
    <graphics y="-1722.5820119236455" z="0.0" x="161.37489638906527"/>
  </node>
  <node id="155340" label="POMT2" cy:nodeId="108023">
    <graphics y="2088.1238596583858" z="0.0" x="-348.0878359259982"/>
  </node>
  <node id="155269" label="B3GNT9" cy:nodeId="108032">
    <graphics y="2374.817066445495" z="0.0" x="-82.43373550790739"/>
  </node>
  <node id="155239" label="UGCG" cy:nodeId="105985">
    <graphics y="-1644.6776845310674" z="0.0" x="100.97474990469027"/>
  </node>
  <node id="155260" label="GMPPB" cy:nodeId="108038">
    <graphics y="-2169.1300465916142" z="0.0" x="-410.51609482187223"/>
  </node>
  <node id="155378" label="GCNT1" cy:nodeId="108552">
    <graphics y="-358.05912374005175" z="0.0" x="478.4129479942899"/>
  </node>
  <node id="155233" label="UGDH" cy:nodeId="108551">
    <graphics y="2374.817066445495" z="0.0" x="-880.7010389747043"/>
  </node>
  <node id="155228" label="SRCAP" cy:nodeId="105994">
    <graphics y="-207.628764853333" z="0.0" x="344.33365188222933"/>
  </node>
  <node id="155300" label="GANAB" cy:nodeId="105998">
    <graphics y="-1627.1222340916142" z="0.0" x="706.5345643578153"/>
  </node>
  <node id="155285" label="GAA" cy:nodeId="108560">
    <graphics y="2374.817066445495" z="0.0" x="-481.5673872413058"/>
  </node>
  <node id="155265" label="GALE" cy:nodeId="108559">
    <graphics y="438.7417185451045" z="0.0" x="309.81817947011996"/>
  </node>
  <node id="155226" label="TAF1" cy:nodeId="106006">
    <graphics y="-1318.9641702030644" z="0.0" x="65.47682510000277"/>
  </node>
  <node id="155351" label="CSNK2A1" cy:nodeId="108568">
    <graphics y="-1720.8579213474736" z="0.0" x="32.72627578359652"/>
  </node>
  <node id="155223" label="TCF12" cy:nodeId="106007">
    <graphics y="-1470.6041524265752" z="0.0" x="24.71242080312777"/>
  </node>
  <node id="155341" label="DOT1L" cy:nodeId="108570">
    <graphics y="2162.8281443263545" z="0.0" x="-451.0609861792941"/>
  </node>
  <node id="155221" label="ALG5" cy:nodeId="106012">
    <graphics y="-1995.1097829197392" z="0.0" x="546.2711452065091"/>
  </node>
  <node id="155222" label="TDRD3" cy:nodeId="106011">
    <graphics y="-1839.4935719822392" z="0.0" x="413.75987563711215"/>
  </node>
  <node id="155337" label="E2F8" cy:nodeId="108575">
    <graphics y="-179.831645712708" z="0.0" x="855.4432252464871"/>
  </node>
  <node id="155304" label="PIGL" cy:nodeId="108578">
    <graphics y="-170.5788380955205" z="0.0" x="1118.179034572659"/>
  </node>
  <node id="155362" label="UGP2" cy:nodeId="108584">
    <graphics y="-1973.4992482517705" z="0.0" x="382.8781465111356"/>
  </node>
  <node id="155213" label="VEZF1" cy:nodeId="106023">
    <graphics y="-1203.0367162083135" z="0.0" x="195.04002700429965"/>
  </node>
  <node id="155211" label="YAP1" cy:nodeId="106026">
    <graphics y="-1398.2886235569463" z="0.0" x="-26.98692001718473"/>
  </node>
  <node id="155346" label="SLC35A4" cy:nodeId="108586">
    <graphics y="2023.3707773829951" z="0.0" x="323.7967256126981"/>
  </node>
  <node id="155212" label="XRN2" cy:nodeId="106025">
    <graphics y="-1957.2353322361455" z="0.0" x="-185.43919052499723"/>
  </node>
  <node id="155253" label="SLC35C1" cy:nodeId="108588">
    <graphics y="2384.114643349792" z="0.0" x="216.69991622549105"/>
  </node>
  <node id="155250" label="GAL3ST3" cy:nodeId="108590">
    <graphics y="2384.114643349792" z="0.0" x="416.26674209219027"/>
  </node>
  <node id="155318" label="GMEB2" cy:nodeId="108589">
    <graphics y="1079.8365061427608" z="0.0" x="-967.0506798209567"/>
  </node>
  <node id="155209" label="ZBTB17" cy:nodeId="106029">
    <graphics y="688.3516581202998" z="0.0" x="11.561534267483239"/>
  </node>
  <node id="155350" label="C1GALT1C1" cy:nodeId="106032">
    <graphics y="-1701.5542409275517" z="0.0" x="-64.67960800546598"/>
  </node>
  <node id="155312" label="HBP1" cy:nodeId="108591">
    <graphics y="-863.7714650486455" z="0.0" x="124.9613526878934"/>
  </node>
  <node id="155299" label="GALNT9" cy:nodeId="108605">
    <graphics y="-1513.746684775208" z="0.0" x="835.2523988304715"/>
  </node>
  <node id="155251" label="PCGF2" cy:nodeId="108608">
    <graphics y="2374.817066445495" z="0.0" x="316.69991622549105"/>
  </node>
  <node id="155237" label="SATB1" cy:nodeId="108614">
    <graphics y="-1655.6852834080205" z="0.0" x="-179.60038437265348"/>
  </node>
  <node id="155234" label="SNAPC1" cy:nodeId="108618">
    <graphics y="2384.114643349792" z="0.0" x="-781.134213108005"/>
  </node>
  <node id="155224" label="TAF7" cy:nodeId="108623">
    <graphics y="-314.9167287205205" z="0.0" x="787.5217317162137"/>
  </node>
  <node id="155220" label="TFE3" cy:nodeId="108625">
    <graphics y="994.6421702052608" z="0.0" x="701.749591213284"/>
  </node>
  <node id="155214" label="TRRAP" cy:nodeId="108628">
    <graphics y="-1294.5056741093144" z="0.0" x="615.2456620751004"/>
  </node>
  <node id="155352" label="ALG2" cy:nodeId="109671">
    <graphics y="2374.817066445495" z="0.0" x="-681.134213108005"/>
  </node>
  <node id="155246" label="XYLT2" cy:nodeId="109684">
    <graphics y="2374.817066445495" z="0.0" x="-282.0005613746066"/>
  </node>
  <node id="155367" label="PIGG" cy:nodeId="109689">
    <graphics y="-417.75236104473925" z="0.0" x="326.89651809316683"/>
  </node>
  <node id="155381" label="BCOR" cy:nodeId="110788">
    <graphics y="-580.6127126072392" z="0.0" x="586.5563500938993"/>
  </node>
  <node id="155405" label="AEBP2" cy:nodeId="110787">
    <graphics y="1942.793110146667" z="0.0" x="58.68698440176058"/>
  </node>
  <node id="155371" label="CARM1" cy:nodeId="110790">
    <graphics y="801.5595286036983" z="0.0" x="-998.9938780249972"/>
  </node>
  <node id="155372" label="BTAF1" cy:nodeId="110789">
    <graphics y="-908.6238515232549" z="0.0" x="-5.74717392343473"/>
  </node>
  <node id="155347" label="DBP" cy:nodeId="110792">
    <graphics y="2103.9505198146358" z="0.0" x="252.7214387474637"/>
  </node>
  <node id="155358" label="CEBPG" cy:nodeId="110791">
    <graphics y="711.308246865417" z="0.0" x="409.81817947011996"/>
  </node>
  <node id="155326" label="ESRRA" cy:nodeId="110794">
    <graphics y="2199.0166208888545" z="0.0" x="-1022.393475192966"/>
  </node>
  <node id="155343" label="DDIT3" cy:nodeId="110793">
    <graphics y="559.042133584167" z="0.0" x="425.7186311302762"/>
  </node>
  <node id="155307" label="HOXA10" cy:nodeId="110796">
    <graphics y="2183.9465525294795" z="0.0" x="-267.0754438819308"/>
  </node>
  <node id="155314" label="GTF3C1" cy:nodeId="110795">
    <graphics y="-777.6435353611455" z="0.0" x="1073.1706117210965"/>
  </node>
  <node id="155294" label="LARP7" cy:nodeId="110798">
    <graphics y="-1462.5243794773564" z="0.0" x="-292.9451109351535"/>
  </node>
  <node id="155306" label="HOXA7" cy:nodeId="110797">
    <graphics y="1981.3732798244014" z="0.0" x="-414.0370947303195"/>
  </node>
  <node id="155281" label="MLLT3" cy:nodeId="110800">
    <graphics y="-1400.9147603367314" z="0.0" x="404.199054103909"/>
  </node>
  <node id="155286" label="MAFG" cy:nodeId="110799">
    <graphics y="2384.114643349792" z="0.0" x="-382.0005613746066"/>
  </node>
  <node id="155261" label="NKX6-1" cy:nodeId="110802">
    <graphics y="-2035.5629689548955" z="0.0" x="-326.19834579843473"/>
  </node>
  <node id="155280" label="MNT" cy:nodeId="110801">
    <graphics y="2010.4645884181514" z="0.0" x="-241.04159225839567"/>
  </node>
  <node id="155258" label="SGSH" cy:nodeId="110804">
    <graphics y="1091.541401162292" z="0.0" x="123.97990928274203"/>
  </node>
  <node id="155259" label="NME2" cy:nodeId="110803">
    <graphics y="984.0459787990108" z="0.0" x="75.47483192068148"/>
  </node>
  <node id="155255" label="GALK2" cy:nodeId="110806">
    <graphics y="438.7417185451045" z="0.0" x="663.159539562283"/>
  </node>
  <node id="155403" label="AFF4" cy:nodeId="105686">
    <graphics y="-1376.7491223667607" z="0.0" x="32.376086574612145"/>
  </node>
  <node id="155256" label="NR0B2" cy:nodeId="110805">
    <graphics y="538.7764475490108" z="0.0" x="602.1013444481473"/>
  </node>
  <node id="155247" label="PIAS4" cy:nodeId="110808">
    <graphics y="2384.114643349792" z="0.0" x="-182.4337355079074"/>
  </node>
  <node id="155401" label="STT3B" cy:nodeId="105688">
    <graphics y="-1415.4812581394658" z="0.0" x="-120.92863144296598"/>
  </node>
  <node id="155254" label="NR1H3" cy:nodeId="110807">
    <graphics y="2374.817066445495" z="0.0" x="117.13309035879183"/>
  </node>
  <node id="155402" label="MAN1A2" cy:nodeId="105687">
    <graphics y="-1334.3197982166753" z="0.0" x="138.46101699453402"/>
  </node>
  <node id="155241" label="PSIP1" cy:nodeId="110810">
    <graphics y="-1383.921619162415" z="0.0" x="-382.7659117164035"/>
  </node>
  <node id="155297" label="FUT11" cy:nodeId="105690">
    <graphics y="-1812.2846486423955" z="0.0" x="-1080.2678648414035"/>
  </node>
  <node id="155242" label="PPARGC1A" cy:nodeId="110809">
    <graphics y="-1532.8121602390752" z="0.0" x="-405.2463804664035"/>
  </node>
  <node id="155231" label="SND1" cy:nodeId="110812">
    <graphics y="-591.0498463963017" z="0.0" x="1179.2485536156278"/>
  </node>
  <node id="155399" label="COG5" cy:nodeId="105692">
    <graphics y="-1412.4021336887822" z="0.0" x="212.65053115469027"/>
  </node>
  <node id="155232" label="SNAPC5" cy:nodeId="110811">
    <graphics y="-1181.4377553318486" z="0.0" x="-186.14512314218473"/>
  </node>
  <node id="155218" label="TOP1" cy:nodeId="110814">
    <graphics y="-1616.5029103611455" z="0.0" x="-319.33872665780973"/>
  </node>
  <node id="155400" label="MAN2A1" cy:nodeId="105694">
    <graphics y="-1541.4768483494267" z="0.0" x="38.69105849844027"/>
  </node>
  <node id="155229" label="SP4" cy:nodeId="110813">
    <graphics y="-1726.7826649998174" z="0.0" x="846.3640626488309"/>
  </node>
  <node id="155217" label="TOP2B" cy:nodeId="110815">
    <graphics y="-2120.0019337986455" z="0.0" x="181.4348634300809"/>
  </node>
  <node id="155397" label="SLC35A3" cy:nodeId="105695">
    <graphics y="-1407.6178090427861" z="0.0" x="157.87306533437777"/>
  </node>
  <node id="155301" label="RTF1" cy:nodeId="105700">
    <graphics y="-1377.2161061619267" z="0.0" x="728.8182405052762"/>
  </node>
  <node id="155395" label="SLC35A5" cy:nodeId="105702">
    <graphics y="-1309.3562905643926" z="0.0" x="-17.19761337655973"/>
  </node>
  <node id="155392" label="ATF1" cy:nodeId="105701">
    <graphics y="-1198.1067845676885" z="0.0" x="-1.8812681617159797"/>
  </node>
  <node id="155391" label="ATF2" cy:nodeId="105704">
    <graphics y="-1548.3671681736455" z="0.0" x="171.55366836172152"/>
  </node>
  <node id="155398" label="UGGT1" cy:nodeId="105705">
    <graphics y="-1467.3344075535283" z="0.0" x="169.83479629140902"/>
  </node>
  <node id="155386" label="ATF7IP" cy:nodeId="105710">
    <graphics y="-952.1445119236455" z="0.0" x="215.0704835472684"/>
  </node>
  <node id="155385" label="ATRX" cy:nodeId="105712">
    <graphics y="-1544.9892537449346" z="0.0" x="-85.91331161874723"/>
  </node>
  <node id="155396" label="ALG10" cy:nodeId="105711">
    <graphics y="-1112.1162526463017" z="0.0" x="155.92186294179965"/>
  </node>
  <node id="155225" label="FKTN" cy:nodeId="105713">
    <graphics y="-1084.4767567966924" z="0.0" x="-50.39750351327848"/>
  </node>
  <node id="155216" label="MAN1A1" cy:nodeId="105716">
    <graphics y="-2274.3169362400517" z="0.0" x="121.91170058828402"/>
  </node>
  <node id="155375" label="CSGALNACT2" cy:nodeId="105715">
    <graphics y="-1705.9740712498174" z="0.0" x="-792.9311949195285"/>
  </node>
  <node id="155354" label="DPM3" cy:nodeId="105722">
    <graphics y="847.3379099513545" z="0.0" x="12.043429714260583"/>
  </node>
  <node id="155376" label="BMI1" cy:nodeId="105726">
    <graphics y="-1622.9382436130986" z="0.0" x="-555.938152927341"/>
  </node>
  <node id="155332" label="ALG10B" cy:nodeId="105727">
    <graphics y="-1236.5560033176885" z="0.0" x="342.94168410879183"/>
  </node>
  <node id="155388" label="SLC35E3" cy:nodeId="105732">
    <graphics y="-1733.5564076755986" z="0.0" x="311.6896241722684"/>
  </node>
  <node id="155404" label="FAM20B" cy:nodeId="105731">
    <graphics y="2058.54191996112" z="0.0" x="54.54840407949496"/>
  </node>
  <node id="155334" label="HYAL2" cy:nodeId="105737">
    <graphics y="1248.3969919826045" z="0.0" x="-947.6232534827609"/>
  </node>
  <node id="155219" label="GALNS" cy:nodeId="105740">
    <graphics y="1098.392849221374" z="0.0" x="748.3167680321317"/>
  </node>
  <node id="155377" label="FUT10" cy:nodeId="107278">
    <graphics y="-953.2176625584111" z="0.0" x="379.3292268334012"/>
  </node>
  <node id="155208" label="RFNG" cy:nodeId="105744">
    <graphics y="604.3995287562861" z="0.0" x="-77.99747909921598"/>
  </node>
  <node id="155276" label="MGAT3" cy:nodeId="105750">
    <graphics y="1666.9209940577998" z="0.0" x="-479.20440353769254"/>
  </node>
  <node id="155364" label="B3GAT3" cy:nodeId="105754">
    <graphics y="2147.5229685451045" z="0.0" x="-922.9191404761691"/>
  </node>
  <node id="155363" label="CDK8" cy:nodeId="105756">
    <graphics y="-1878.6833913181767" z="0.0" x="283.33433852773715"/>
  </node>
  <node id="155365" label="CCDC101" cy:nodeId="105755">
    <graphics y="2274.817066445495" z="0.0" x="-891.8209349097629"/>
  </node>
  <node id="155370" label="DPM2" cy:nodeId="105758">
    <graphics y="666.0161936427608" z="0.0" x="-999.4733721198459"/>
  </node>
  <node id="155361" label="CDK9" cy:nodeId="105757">
    <graphics y="525.4252512599483" z="0.0" x="-996.1692091407199"/>
  </node>
  <node id="155360" label="MAN1B1" cy:nodeId="105760">
    <graphics y="438.7417185451045" z="0.0" x="-1080.2678648414035"/>
  </node>
  <node id="155338" label="PIGQ" cy:nodeId="105759">
    <graphics y="-812.5730397556767" z="0.0" x="1359.5318788109403"/>
  </node>
  <node id="155308" label="MOGS" cy:nodeId="105762">
    <graphics y="1942.793110146667" z="0.0" x="-1080.2678648414035"/>
  </node>
  <node id="155348" label="CHST12" cy:nodeId="105763">
    <graphics y="2109.1365549708858" z="0.0" x="-664.4939085425754"/>
  </node>
  <node id="155329" label="MFNG" cy:nodeId="105766">
    <graphics y="1621.1110575343623" z="0.0" x="-782.2564360083957"/>
  </node>
  <node id="155316" label="NAGK" cy:nodeId="105765">
    <graphics y="2493.412220254089" z="0.0" x="-781.134213108005"/>
  </node>
  <node id="155277" label="A4GALT" cy:nodeId="105768">
    <graphics y="1816.2969248439326" z="0.0" x="-541.3379789771457"/>
  </node>
  <node id="155357" label="CHD4" cy:nodeId="105773">
    <graphics y="-1813.9161488865361" z="0.0" x="519.1364186821561"/>
  </node>
  <node id="155296" label="KAT2B" cy:nodeId="107312">
    <graphics y="-1602.831889853333" z="0.0" x="272.500323635159"/>
  </node>
  <node id="155356" label="CPSF3L" cy:nodeId="105780">
    <graphics y="903.9260752345576" z="0.0" x="-138.8717771949191"/>
  </node>
  <node id="155264" label="B3GALT6" cy:nodeId="105781">
    <graphics y="640.0348589564815" z="0.0" x="144.07469497304965"/>
  </node>
  <node id="155293" label="LDB1" cy:nodeId="107320">
    <graphics y="-876.119487509583" z="0.0" x="1538.2198670921903"/>
  </node>
  <node id="155353" label="CREB3" cy:nodeId="105786">
    <graphics y="2384.114643349792" z="0.0" x="-581.5673872413058"/>
  </node>
  <node id="155284" label="MBD3" cy:nodeId="107323">
    <graphics y="1942.793110146667" z="0.0" x="394.87430129629183"/>
  </node>
  <node id="155321" label="COG7" cy:nodeId="105791">
    <graphics y="37.346699013854504" z="0.0" x="294.9803956566434"/>
  </node>
  <node id="155349" label="CTBP1" cy:nodeId="105793">
    <graphics y="2119.5967295314326" z="0.0" x="-785.8848387183566"/>
  </node>
  <node id="155382" label="SLC35B1" cy:nodeId="105798">
    <graphics y="646.2917978908076" z="0.0" x="517.6622956810575"/>
  </node>
  <node id="155359" label="ALG3" cy:nodeId="105797">
    <graphics y="459.6589548732295" z="0.0" x="-896.4857450904269"/>
  </node>
  <node id="155313" label="SLC35A2" cy:nodeId="107335">
    <graphics y="-680.473735556458" z="0.0" x="1084.5891297875028"/>
  </node>
  <node id="155369" label="MPI" cy:nodeId="107340">
    <graphics y="937.6587107326045" z="0.0" x="-988.2144133033175"/>
  </node>
  <node id="155292" label="ST3GAL2" cy:nodeId="105806">
    <graphics y="-901.8209645603642" z="0.0" x="1667.276934963284"/>
  </node>
  <node id="155366" label="CSGALNACT1" cy:nodeId="105805">
    <graphics y="-589.758403525208" z="0.0" x="286.4655793724637"/>
  </node>
  <node id="155230" label="SP2" cy:nodeId="107346">
    <graphics y="-1077.911220297669" z="0.0" x="306.685626369534"/>
  </node>
  <node id="155393" label="PIGK" cy:nodeId="106835">
    <graphics y="-1495.2144276951299" z="0.0" x="-145.14701523202848"/>
  </node>
  <node id="155244" label="LAMP2" cy:nodeId="107350">
    <graphics y="-1820.0208852146611" z="0.0" x="120.10060439687777"/>
  </node>
  <node id="155335" label="EGLN2" cy:nodeId="105813">
    <graphics y="1261.110996499206" z="0.0" x="-1064.6321073951144"/>
  </node>
  <node id="155273" label="SLC35E1" cy:nodeId="106844">
    <graphics y="-789.7739064548955" z="0.0" x="927.2600587425809"/>
  </node>
  <node id="155344" label="UAP1" cy:nodeId="105820">
    <graphics y="-1233.3344685886846" z="0.0" x="-638.360027927341"/>
  </node>
  <node id="155290" label="LFNG" cy:nodeId="106846">
    <graphics y="1403.384590401794" z="0.0" x="-740.0838285865207"/>
  </node>
  <node id="155390" label="COG6" cy:nodeId="105824">
    <graphics y="-1540.8259694431767" z="0.0" x="306.83743606191683"/>
  </node>
  <node id="155368" label="CBX6" cy:nodeId="106847">
    <graphics y="-690.412456259583" z="0.0" x="365.90700088125277"/>
  </node>
  <node id="155345" label="DCP1A" cy:nodeId="106850">
    <graphics y="-1285.48098729596" z="0.0" x="-480.263836521091"/>
  </node>
  <node id="155333" label="ELF2" cy:nodeId="105825">
    <graphics y="-1235.0806157444463" z="0.0" x="491.6639207420926"/>
  </node>
  <node id="155330" label="ERG" cy:nodeId="105832">
    <graphics y="1763.9901011134639" z="0.0" x="-843.3935133399386"/>
  </node>
  <node id="155331" label="ERF" cy:nodeId="105831">
    <graphics y="2105.66057230487" z="0.0" x="-551.0609861792941"/>
  </node>
  <node id="155328" label="ST8SIA4" cy:nodeId="105834">
    <graphics y="1756.3847544337764" z="0.0" x="-988.0296427192111"/>
  </node>
  <node id="155327" label="CHST15" cy:nodeId="106861">
    <graphics y="1842.793110146667" z="0.0" x="-895.8068586768527"/>
  </node>
  <node id="155323" label="GPI" cy:nodeId="106864">
    <graphics y="2493.412220254089" z="0.0" x="-980.7010389747043"/>
  </node>
  <node id="155324" label="GAPDH" cy:nodeId="106863">
    <graphics y="2484.114643349792" z="0.0" x="-1080.2678648414035"/>
  </node>
  <node id="155317" label="GPS2" cy:nodeId="106865">
    <graphics y="2484.114643349792" z="0.0" x="-880.7010389747043"/>
  </node>
  <node id="155310" label="HIF1A" cy:nodeId="106867">
    <graphics y="-1281.2437245701299" z="0.0" x="181.66658340078402"/>
  </node>
  <node id="155305" label="HOXB4" cy:nodeId="106870">
    <graphics y="-264.0439259861455" z="0.0" x="1008.6855042992215"/>
  </node>
  <node id="155325" label="FLI1" cy:nodeId="105848">
    <graphics y="1696.1597178126826" z="0.0" x="-904.8796163978"/>
  </node>
  <node id="155282" label="RPN2" cy:nodeId="105854">
    <graphics y="-1063.1611440037236" z="0.0" x="574.9912866173368"/>
  </node>
  <node id="155373" label="GNPNAT1" cy:nodeId="105855">
    <graphics y="-1768.0894887302861" z="0.0" x="-161.34330429452848"/>
  </node>
  <node id="155243" label="PPARA" cy:nodeId="106881">
    <graphics y="-1231.5398747776494" z="0.0" x="-321.61729111093473"/>
  </node>
  <node id="155287" label="NPL" cy:nodeId="105860">
    <graphics y="2374.817066445495" z="0.0" x="-1080.2678648414035"/>
  </node>
  <node id="155235" label="SIRT6" cy:nodeId="106885">
    <graphics y="768.5519144679561" z="0.0" x="123.8745664177518"/>
  </node>
  <node id="155322" label="GLYR1" cy:nodeId="105866">
    <graphics y="221.0053904201045" z="0.0" x="245.94844375234652"/>
  </node>
  <node id="155320" label="ALG1" cy:nodeId="105867">
    <graphics y="299.319965615417" z="0.0" x="143.5045655785184"/>
  </node>
  <node id="155379" label="COG8" cy:nodeId="106891">
    <graphics y="-688.7945973728642" z="0.0" x="680.7359345970731"/>
  </node>
  <node id="155210" label="ZBTB10" cy:nodeId="106894">
    <graphics y="-986.3610951755986" z="0.0" x="87.38136611562777"/>
  </node>
  <node id="155267" label="STT3A" cy:nodeId="106893">
    <graphics y="2493.412220254089" z="0.0" x="-581.5673872413058"/>
  </node>
  <node id="155315" label="GTF2I" cy:nodeId="105871">
    <graphics y="-1438.4049107883916" z="0.0" x="288.53673110586215"/>
  </node>
  <node id="155380" label="PIGO" cy:nodeId="105874">
    <graphics y="-402.54154561505175" z="0.0" x="834.3592408714871"/>
  </node>
  <node id="155311" label="HECTD1" cy:nodeId="105875">
    <graphics y="2119.9995005275264" z="0.0" x="152.7214387474637"/>
  </node>
  <node id="155383" label="DPAGT1" cy:nodeId="105878">
    <graphics y="886.2289927150264" z="0.0" x="652.5484074173551"/>
  </node>
  <node id="155309" label="HINFP" cy:nodeId="105877">
    <graphics y="2035.1189158107295" z="0.0" x="-1009.4055601539035"/>
  </node>
  <node id="155355" label="TSTA3" cy:nodeId="105880">
    <graphics y="954.0796702052608" z="0.0" x="-269.24065842050504"/>
  </node>
  <node id="155303" label="HSF1" cy:nodeId="105879">
    <graphics y="995.005024209167" z="0.0" x="-379.20440353769254"/>
  </node>
  <node id="155271" label="GPAA1" cy:nodeId="105881">
    <graphics y="-592.323589072083" z="0.0" x="825.6018556175809"/>
  </node>
  <node id="155302" label="INO80" cy:nodeId="105885">
    <graphics y="-1490.9831960056767" z="0.0" x="647.2778352318387"/>
  </node>
  <node id="155298" label="JMJD1C" cy:nodeId="105892">
    <graphics y="-1766.4657704685674" z="0.0" x="-958.7805601539035"/>
  </node>
  <node id="155262" label="MGAT5" cy:nodeId="105893">
    <graphics y="-1856.4992482517705" z="0.0" x="-30.81760849374723"/>
  </node>
  <node id="155295" label="KDM5A" cy:nodeId="105904">
    <graphics y="-1331.8996565197453" z="0.0" x="251.46638808828402"/>
  </node>
  <node id="155394" label="HS2ST1" cy:nodeId="105906">
    <graphics y="-1301.4981152866826" z="0.0" x="-107.94395126718473"/>
  </node>
  <node id="155389" label="GNS" cy:nodeId="105905">
    <graphics y="-1631.9252736423955" z="0.0" x="200.15382705312777"/>
  </node>
  <node id="155291" label="LMO2" cy:nodeId="105909">
    <graphics y="1512.9881708766475" z="0.0" x="-717.6059080542941"/>
  </node>
  <node id="155289" label="LYL1" cy:nodeId="105911">
    <graphics y="1415.3215944911494" z="0.0" x="-852.3004805030246"/>
  </node>
  <node id="155288" label="MAFB" cy:nodeId="105914">
    <graphics y="2384.114643349792" z="0.0" x="-980.7010389747043"/>
  </node>
  <node id="155279" label="B4GALT2" cy:nodeId="105917">
    <graphics y="1942.793110146667" z="0.0" x="-147.7625242652316"/>
  </node>
  <node id="155283" label="MECOM" cy:nodeId="105919">
    <graphics y="-1114.7579915379033" z="0.0" x="494.2897294579129"/>
  </node>
  <node id="155274" label="FUT8" cy:nodeId="107976">
    <graphics y="-547.8304860447392" z="0.0" x="948.0499452171903"/>
  </node>
  <node id="155384" label="BARX2" cy:nodeId="107975">
    <graphics y="770.6787302638545" z="0.0" x="592.9887269554715"/>
  </node>
  <node id="155374" label="BRD7" cy:nodeId="107977">
    <graphics y="-1891.0839040134892" z="0.0" x="-300.82224716562223"/>
  </node>
  <node id="155278" label="MSX1" cy:nodeId="105932">
    <graphics y="1701.3631327296748" z="0.0" x="-602.6388822974582"/>
  </node>
  <node id="155275" label="MYBL1" cy:nodeId="105934">
    <graphics y="-669.4914357517705" z="0.0" x="899.8289674339871"/>
  </node>
  <node id="155236" label="RPN1" cy:nodeId="105936">
    <graphics y="-1763.7807118748174" z="0.0" x="-369.662518161716"/>
  </node>
  <node id="155227" label="B3GNT8" cy:nodeId="107983">
    <graphics y="-130.831889853333" z="0.0" x="254.0811036644559"/>
  </node>
  <node id="155342" label="DICER1" cy:nodeId="107985">
    <graphics y="-847.7490956638799" z="0.0" x="465.09479079824496"/>
  </node>
  <node id="155339" label="E2F4" cy:nodeId="107987">
    <graphics y="-738.364848837708" z="0.0" x="1460.9301942406278"/>
  </node>
  <node id="155270" label="MZF1" cy:nodeId="105942">
    <graphics y="2384.114643349792" z="0.0" x="17.133090358791833"/>
  </node>
  <node id="155268" label="NFAT5" cy:nodeId="105943">
    <graphics y="2484.114643349792" z="0.0" x="-681.134213108005"/>
  </node>
  <node id="155266" label="NFYC" cy:nodeId="105946">
    <graphics y="529.9652140285029" z="0.0" x="236.74508987051058"/>
  </node>
  <node id="155257" label="NPAT" cy:nodeId="105948">
    <graphics y="-1556.9458424900517" z="0.0" x="503.05533156972933"/>
  </node>
  <node id="155263" label="NIPBL" cy:nodeId="105947">
    <graphics y="-1597.1787831638799" z="0.0" x="-1.1070372046847297"/>
  </node>
  <node id="155252" label="NR2C2" cy:nodeId="105949">
    <graphics y="-1333.7207553242192" z="0.0" x="-271.0293394507785"/>
  </node>
  <node id="155336" label="NANS" cy:nodeId="108002">
    <graphics y="-40.767070517395496" z="0.0" x="876.9381288109403"/>
  </node>
  <node id="155248" label="PIAS1" cy:nodeId="105958">
    <graphics y="-1071.2537953709111" z="0.0" x="-199.67930282968473"/>
  </node>
  <node id="155249" label="PHF6" cy:nodeId="105957">
    <graphics y="2112.8325998927608" z="0.0" x="-47.762524265231605"/>
  </node>
  <node id="155272" label="DAD1" cy:nodeId="108008">
    <graphics y="-568.455180868958" z="0.0" x="1066.743487697659"/>
  </node>
  <node id="155245" label="POLR2B" cy:nodeId="105959">
    <graphics y="-1513.839931235169" z="0.0" x="103.65306411367465"/>
  </node>
  <node id="155215" label="UGGT2" cy:nodeId="105966">
    <graphics y="-2268.995952353333" z="0.0" x="260.0220216332059"/>
  </node>
</graph>
