# Supplementary material for: A systems-based framework to computationally describe putative transcription factors and signaling pathways regulating glycan biosynthesis
Source: publisher site journal article supplement (doi:10.3762/bjoc.17.119), 2021-07-22
Supplement: Additional file 2 [file 1860-5397-17-119-S2.cys › CytoscapeSession-2021_03_21-12_01/views/111080-136447-KIRC.xgmml]

<?xml version="1.0" encoding="UTF-8" standalone="yes"?>
<graph id="136447" label="KIRC" cy:view="1" cy:networkId="111080" cy:visualStyle="default" cy:rendererId="org.cytoscape.ding" cy:documentVersion="3.0" xmlns:dc="http://purl.org/dc/elements/1.1/" xmlns:xlink="http://www.w3.org/1999/xlink" xmlns:rdf="http://www.w3.org/1999/02/22-rdf-syntax-ns#" xmlns:cy="http://www.cytoscape.org" xmlns="http://www.cs.rpi.edu/XGMML">
  <graphics>
    <att name="NETWORK_NODE_SELECTION" value="true" type="string" cy:type="String"/>
    <att name="NETWORK_CENTER_X_LOCATION" value="-204.7291259765625" type="string" cy:type="String"/>
    <att name="NETWORK_HEIGHT" value="510.0" type="string" cy:type="String"/>
    <att name="NETWORK_TITLE" value="KIRC" type="string" cy:type="String"/>
    <att name="NETWORK_EDGE_SELECTION" value="true" type="string" cy:type="String"/>
    <att name="NETWORK_CENTER_Y_LOCATION" value="-79.5408935546875" type="string" cy:type="String"/>
    <att name="NETWORK_WIDTH" value="1312.0" type="string" cy:type="String"/>
    <att name="NETWORK_DEPTH" value="0.0" type="string" cy:type="String"/>
    <att name="NETWORK_SCALE_FACTOR" value="0.15941758149766871" type="string" cy:type="String"/>
    <att name="NETWORK_ANNOTATION_SELECTION" value="false" type="string" cy:type="String"/>
    <att name="NETWORK_CENTER_Z_LOCATION" value="0.0" type="string" cy:type="String"/>
  </graphics>
  <node id="136808" label="ATF4" cy:nodeId="108550">
    <graphics y="-625.9926049084215" z="0.0" x="-290.5705494153499"/>
  </node>
  <node id="136794" label="GCNT1" cy:nodeId="108552">
    <graphics y="-46.27287167020131" z="0.0" x="-690.6338276135921"/>
  </node>
  <node id="136795" label="UGDH" cy:nodeId="108551">
    <graphics y="762.601755443141" z="0.0" x="-22.530739234685825"/>
  </node>
  <node id="136710" label="PMM2" cy:nodeId="108556">
    <graphics y="-1174.543019947484" z="0.0" x="-476.0878681409358"/>
  </node>
  <node id="136481" label="PIGC" cy:nodeId="108558">
    <graphics y="1470.5402930407972" z="0.0" x="-1792.585976051092"/>
  </node>
  <node id="136736" label="GALE" cy:nodeId="108559">
    <graphics y="-1177.432180103734" z="0.0" x="-381.2848896253108"/>
  </node>
  <node id="136777" label="GALNT6" cy:nodeId="108561">
    <graphics y="-162.56316917844106" z="0.0" x="-870.6485981214046"/>
  </node>
  <node id="136728" label="CSNK2A1" cy:nodeId="108568">
    <graphics y="872.0835669665785" z="0.0" x="871.5266338121892"/>
  </node>
  <node id="136714" label="DR1" cy:nodeId="108571">
    <graphics y="268.7652075915785" z="0.0" x="1078.856650902033"/>
  </node>
  <node id="136759" label="PIGL" cy:nodeId="108578">
    <graphics y="-885.087941822484" z="0.0" x="-49.48634188055985"/>
  </node>
  <node id="136564" label="EXT1" cy:nodeId="108580">
    <graphics y="726.7544043689222" z="0.0" x="-797.9001240003108"/>
  </node>
  <node id="136793" label="UGP2" cy:nodeId="108584">
    <graphics y="957.074167552516" z="0.0" x="-129.43853800177567"/>
  </node>
  <node id="136676" label="SLC35A4" cy:nodeId="108586">
    <graphics y="-1546.535451588109" z="0.0" x="-250.3963855969905"/>
  </node>
  <node id="136660" label="FOXO3" cy:nodeId="108587">
    <graphics y="248.08976203493785" z="0.0" x="620.4062114489079"/>
  </node>
  <node id="136637" label="HBP1" cy:nodeId="108591">
    <graphics y="1020.0745337634535" z="0.0" x="871.3557964098454"/>
  </node>
  <node id="136667" label="SULT1A3" cy:nodeId="108594">
    <graphics y="-661.2014061779528" z="0.0" x="106.43764455437667"/>
  </node>
  <node id="136636" label="HDAC6" cy:nodeId="108593">
    <graphics y="-1544.140187916234" z="0.0" x="225.45922048211105"/>
  </node>
  <node id="136582" label="MAFF" cy:nodeId="108598">
    <graphics y="-37.75178566284467" z="0.0" x="46.203765465021206"/>
  </node>
  <node id="136591" label="KLF15" cy:nodeId="108597">
    <graphics y="-1513.429982838109" z="0.0" x="360.7921672594548"/>
  </node>
  <node id="136530" label="RBCK1" cy:nodeId="108610">
    <graphics y="-1125.425832447484" z="0.0" x="-1149.4391254651546"/>
  </node>
  <node id="136734" label="CHST5" cy:nodeId="108612">
    <graphics y="-902.4408470959215" z="0.0" x="-283.14063303351395"/>
  </node>
  <node id="136523" label="RFX2" cy:nodeId="108611">
    <graphics y="-448.76521843381215" z="0.0" x="-187.60787241339676"/>
  </node>
  <node id="136510" label="SATB1" cy:nodeId="108614">
    <graphics y="1259.1558325915785" z="0.0" x="520.3711772692204"/>
  </node>
  <node id="136508" label="SFMBT1" cy:nodeId="108615">
    <graphics y="962.5146582751722" z="0.0" x="341.5263896715642"/>
  </node>
  <node id="136479" label="SUPT5H" cy:nodeId="108622">
    <graphics y="-878.370412525609" z="0.0" x="233.38719899773605"/>
  </node>
  <node id="136475" label="TAL1" cy:nodeId="108624">
    <graphics y="103.18403083376597" z="0.0" x="12.982734276056362"/>
  </node>
  <node id="136462" label="THAP1" cy:nodeId="108626">
    <graphics y="437.3157447009535" z="0.0" x="1120.002646995783"/>
  </node>
  <node id="136461" label="TRRAP" cy:nodeId="108628">
    <graphics y="182.5175116687269" z="0.0" x="1037.426719261408"/>
  </node>
  <node id="136732" label="ALG2" cy:nodeId="109671">
    <graphics y="-78.94076698727895" z="0.0" x="1177.638389183283"/>
  </node>
  <node id="136646" label="GLIS1" cy:nodeId="109678">
    <graphics y="-959.9076439709215" z="0.0" x="415.02733571648605"/>
  </node>
  <node id="136673" label="NAGLU" cy:nodeId="109680">
    <graphics y="-1512.0365502209215" z="0.0" x="-382.4630512464046"/>
  </node>
  <node id="136633" label="HEY1" cy:nodeId="109679">
    <graphics y="369.2747290759535" z="0.0" x="-248.69622080206864"/>
  </node>
  <node id="136497" label="SNAI2" cy:nodeId="109686">
    <graphics y="454.6181433825941" z="0.0" x="-471.5456012952327"/>
  </node>
  <node id="136556" label="NR1H2" cy:nodeId="109685">
    <graphics y="-1030.3127343029528" z="0.0" x="-507.1368183362483"/>
  </node>
  <node id="136761" label="PIGG" cy:nodeId="109689">
    <graphics y="-182.01338737912465" z="0.0" x="521.0996318590642"/>
  </node>
  <node id="136846" label="AEBP2" cy:nodeId="110787">
    <graphics y="885.103952708766" z="0.0" x="202.48424489617355"/>
  </node>
  <node id="136760" label="BTAF1" cy:nodeId="110789">
    <graphics y="-1110.6259056896715" z="0.0" x="20.38378102898605"/>
  </node>
  <node id="136680" label="ESRRA" cy:nodeId="110794">
    <graphics y="-1293.9889427990465" z="0.0" x="-374.7250751721858"/>
  </node>
  <node id="136717" label="DDIT3" cy:nodeId="110793">
    <graphics y="-953.6012474865465" z="0.0" x="-117.62076990485184"/>
  </node>
  <node id="136757" label="SGSH" cy:nodeId="110804">
    <graphics y="-1353.5297142834215" z="0.0" x="-946.9899677503108"/>
  </node>
  <node id="136848" label="ADNP" cy:nodeId="105684">
    <graphics y="-535.8443810314684" z="0.0" x="-1091.9869770276546"/>
  </node>
  <node id="136642" label="GALK2" cy:nodeId="110806">
    <graphics y="129.72359687380504" z="0.0" x="1264.878135277033"/>
  </node>
  <node id="136844" label="AFF4" cy:nodeId="105686">
    <graphics y="672.769968333766" z="0.0" x="303.6315227282048"/>
  </node>
  <node id="136847" label="FUT7" cy:nodeId="105685">
    <graphics y="-535.447805103734" z="0.0" x="-766.4646381604671"/>
  </node>
  <node id="136842" label="STT3B" cy:nodeId="105688">
    <graphics y="572.7458594470472" z="0.0" x="309.0963359606267"/>
  </node>
  <node id="136843" label="MAN1A2" cy:nodeId="105687">
    <graphics y="531.6671240954847" z="0.0" x="371.4976421129704"/>
  </node>
  <node id="136840" label="FUT11" cy:nodeId="105690">
    <graphics y="456.8905127673597" z="0.0" x="636.5623393785954"/>
  </node>
  <node id="136841" label="NEU3" cy:nodeId="105689">
    <graphics y="639.112497630641" z="0.0" x="228.1973186266423"/>
  </node>
  <node id="136496" label="SND1" cy:nodeId="110812">
    <graphics y="1172.574167552516" z="0.0" x="773.6400981676579"/>
  </node>
  <node id="136839" label="COG5" cy:nodeId="105692">
    <graphics y="702.7729590564222" z="0.0" x="459.0333476793767"/>
  </node>
  <node id="136835" label="ACER2" cy:nodeId="105691">
    <graphics y="416.83817512087535" z="0.0" x="312.5098186266423"/>
  </node>
  <node id="136836" label="MAN2A1" cy:nodeId="105694">
    <graphics y="683.8022559314222" z="0.0" x="513.9361797106267"/>
  </node>
  <node id="136837" label="AR" cy:nodeId="105693">
    <graphics y="614.7910254626722" z="0.0" x="625.4505229723454"/>
  </node>
  <node id="136826" label="SLC35F5" cy:nodeId="105696">
    <graphics y="721.5739844470472" z="0.0" x="576.3897319567204"/>
  </node>
  <node id="136833" label="SLC35A3" cy:nodeId="105695">
    <graphics y="495.383005443141" z="0.0" x="581.2959819567204"/>
  </node>
  <node id="136596" label="RTF1" cy:nodeId="105700">
    <graphics y="854.173288646266" z="0.0" x="308.72716481804855"/>
  </node>
  <node id="136818" label="ARID2" cy:nodeId="105699">
    <graphics y="409.3381140857191" z="0.0" x="1243.7937846910954"/>
  </node>
  <node id="136812" label="SLC35A5" cy:nodeId="105702">
    <graphics y="562.8352149157972" z="0.0" x="605.2630229723454"/>
  </node>
  <node id="136813" label="ATF1" cy:nodeId="105701">
    <graphics y="602.9462989001722" z="0.0" x="681.1012798082829"/>
  </node>
  <node id="136809" label="ATF2" cy:nodeId="105704">
    <graphics y="628.1670020251722" z="0.0" x="529.9378276598454"/>
  </node>
  <node id="136811" label="GALNT4" cy:nodeId="105703">
    <graphics y="719.7868750720472" z="0.0" x="678.0728374254704"/>
  </node>
  <node id="136698" label="UGGT1" cy:nodeId="105705">
    <graphics y="783.845163646266" z="0.0" x="393.8241191637517"/>
  </node>
  <node id="136800" label="ATF7IP" cy:nodeId="105710">
    <graphics y="711.6192725329847" z="0.0" x="862.9993510973454"/>
  </node>
  <node id="136653" label="HAS2" cy:nodeId="105709">
    <graphics y="404.7544654040785" z="0.0" x="-722.2996601331233"/>
  </node>
  <node id="136825" label="ALG10" cy:nodeId="105711">
    <graphics y="662.8261817126722" z="0.0" x="670.5333476793767"/>
  </node>
  <node id="136798" label="BACH1" cy:nodeId="105714">
    <graphics y="640.696970286891" z="0.0" x="68.87430532097824"/>
  </node>
  <node id="136830" label="FKTN" cy:nodeId="105713">
    <graphics y="293.584665599391" z="0.0" x="549.1704936754704"/>
  </node>
  <node id="136796" label="MAN1A1" cy:nodeId="105716">
    <graphics y="836.153757396266" z="0.0" x="30.128028465509487"/>
  </node>
  <node id="136797" label="CSGALNACT2" cy:nodeId="105715">
    <graphics y="448.3840125232191" z="0.0" x="219.63317067742355"/>
  </node>
  <node id="136784" label="CHST11" cy:nodeId="105718">
    <graphics y="-340.6818749279528" z="0.0" x="-933.4393085706233"/>
  </node>
  <node id="136707" label="CHSY1" cy:nodeId="105717">
    <graphics y="437.9646704822035" z="0.0" x="36.0179973375798"/>
  </node>
  <node id="136517" label="GFPT2" cy:nodeId="105719">
    <graphics y="206.3275397448988" z="0.0" x="-1150.309853004217"/>
  </node>
  <node id="136806" label="DPM3" cy:nodeId="105722">
    <graphics y="-824.813527759984" z="0.0" x="-436.7725605237483"/>
  </node>
  <node id="136792" label="BATF" cy:nodeId="105721">
    <graphics y="-655.243947681859" z="0.0" x="-940.0429462659358"/>
  </node>
  <node id="136789" label="MGAT1" cy:nodeId="105724">
    <graphics y="-771.7936302990465" z="0.0" x="-1228.2137836682796"/>
  </node>
  <node id="136770" label="BMI1" cy:nodeId="105726">
    <graphics y="552.2979224353285" z="0.0" x="423.63964040398605"/>
  </node>
  <node id="136778" label="BCAT1" cy:nodeId="105725">
    <graphics y="-51.57068031735707" z="0.0" x="-885.2205585706233"/>
  </node>
  <node id="136769" label="ALG10B" cy:nodeId="105727">
    <graphics y="401.9847510486097" z="0.0" x="679.0710063707829"/>
  </node>
  <node id="136657" label="PIGN" cy:nodeId="105730">
    <graphics y="745.6335547595472" z="0.0" x="508.9888530504704"/>
  </node>
  <node id="136743" label="PIGW" cy:nodeId="105729">
    <graphics y="-140.37695854611684" z="0.0" x="625.8528056871892"/>
  </node>
  <node id="136823" label="SLC35E3" cy:nodeId="105732">
    <graphics y="828.7592871814222" z="0.0" x="747.6905742418767"/>
  </node>
  <node id="136845" label="FAM20B" cy:nodeId="105731">
    <graphics y="501.9150489001722" z="0.0" x="449.4768291246892"/>
  </node>
  <node id="136692" label="ALG12" cy:nodeId="105734">
    <graphics y="-1284.4154564709215" z="0.0" x="-223.40055124640458"/>
  </node>
  <node id="136753" label="PMM1" cy:nodeId="105735">
    <graphics y="-713.2982079357653" z="0.0" x="462.3892436754704"/>
  </node>
  <node id="136756" label="CASP8AP2" cy:nodeId="105738">
    <graphics y="-15.778093037083636" z="0.0" x="639.8847881090642"/>
  </node>
  <node id="136687" label="HYAL2" cy:nodeId="105737">
    <graphics y="-52.129703220799456" z="0.0" x="-141.49407236456864"/>
  </node>
  <node id="136807" label="RFNG" cy:nodeId="105744">
    <graphics y="-1005.560842213109" z="0.0" x="-401.26783029913895"/>
  </node>
  <node id="136586" label="ST6GALNAC6" cy:nodeId="105746">
    <graphics y="180.24994880251597" z="0.0" x="-550.2318500745296"/>
  </node>
  <node id="136755" label="CBX7" cy:nodeId="105745">
    <graphics y="-345.268117603734" z="0.0" x="601.9233012926579"/>
  </node>
  <node id="136762" label="MAN2A2" cy:nodeId="105748">
    <graphics y="-510.5395714611559" z="0.0" x="166.5413890612126"/>
  </node>
  <node id="136711" label="IDUA" cy:nodeId="105749">
    <graphics y="-948.0953881115465" z="0.0" x="-559.6886982190608"/>
  </node>
  <node id="136774" label="B3GAT3" cy:nodeId="105754">
    <graphics y="-878.926564869359" z="0.0" x="-536.133552955389"/>
  </node>
  <node id="136678" label="GALK1" cy:nodeId="105753">
    <graphics y="-1214.060842213109" z="0.0" x="-561.5292133557796"/>
  </node>
  <node id="136555" label="DPM2" cy:nodeId="105758">
    <graphics y="-1102.657766041234" z="0.0" x="-684.4759296643733"/>
  </node>
  <node id="136737" label="PIGQ" cy:nodeId="105759">
    <graphics y="-1048.3856713146715" z="0.0" x="-307.80632822394364"/>
  </node>
  <node id="136775" label="MOGS" cy:nodeId="105762">
    <graphics y="-947.2502343029528" z="0.0" x="-328.4997944104671"/>
  </node>
  <node id="136751" label="POMT1" cy:nodeId="105761">
    <graphics y="-446.84212273068715" z="0.0" x="609.8248515856267"/>
  </node>
  <node id="136773" label="CHST12" cy:nodeId="105763">
    <graphics y="-795.550588306859" z="0.0" x="-636.1082538831233"/>
  </node>
  <node id="136685" label="MFNG" cy:nodeId="105766">
    <graphics y="44.26555854372691" z="0.0" x="-240.11507456183426"/>
  </node>
  <node id="136791" label="NAGK" cy:nodeId="105765">
    <graphics y="-594.5710350842028" z="0.0" x="-684.0962299573421"/>
  </node>
  <node id="136805" label="A4GALT" cy:nodeId="105768">
    <graphics y="-334.966603931859" z="0.0" x="-265.88330881476395"/>
  </node>
  <node id="136748" label="CEBPB" cy:nodeId="105767">
    <graphics y="-346.00081413693715" z="0.0" x="-1084.304970191717"/>
  </node>
  <node id="136742" label="CHD2" cy:nodeId="105770">
    <graphics y="23.319708171412458" z="0.0" x="469.2018047106267"/>
  </node>
  <node id="136745" label="CHD1" cy:nodeId="105769">
    <graphics y="120.67557746462535" z="0.0" x="366.01940114617355"/>
  </node>
  <node id="136763" label="NDST2" cy:nodeId="105772">
    <graphics y="-62.19408958859731" z="0.0" x="314.0106731188298"/>
  </node>
  <node id="136741" label="OGT" cy:nodeId="105771">
    <graphics y="-436.04964226193715" z="0.0" x="139.46984059929855"/>
  </node>
  <node id="136790" label="LAMP3" cy:nodeId="105776">
    <graphics y="-285.51736992306996" z="0.0" x="-878.9572529065608"/>
  </node>
  <node id="136740" label="CIITA" cy:nodeId="105775">
    <graphics y="-147.36125725217153" z="0.0" x="-483.73255197882645"/>
  </node>
  <node id="136780" label="GAL3ST4" cy:nodeId="105778">
    <graphics y="-296.5065819592028" z="0.0" x="-724.6915668714046"/>
  </node>
  <node id="136802" label="MAN2B1" cy:nodeId="105777">
    <graphics y="-572.986135181859" z="0.0" x="-607.0863422620296"/>
  </node>
  <node id="136738" label="CPSF3L" cy:nodeId="105780">
    <graphics y="-1008.0223900646715" z="0.0" x="-217.439476417303"/>
  </node>
  <node id="136739" label="DSE" cy:nodeId="105779">
    <graphics y="107.22150641970347" z="0.0" x="-483.4444050061702"/>
  </node>
  <node id="136538" label="B4GALT7" cy:nodeId="105782">
    <graphics y="-992.764699634984" z="0.0" x="-1792.585976051092"/>
  </node>
  <node id="136772" label="B3GALT6" cy:nodeId="105781">
    <graphics y="-693.4963280529528" z="0.0" x="-487.16394846320145"/>
  </node>
  <node id="136674" label="POMGNT1" cy:nodeId="105783">
    <graphics y="-1351.881642994359" z="0.0" x="-549.1110615003108"/>
  </node>
  <node id="136733" label="CREB3" cy:nodeId="105786">
    <graphics y="-177.68916862912465" z="0.0" x="1383.127646995783"/>
  </node>
  <node id="136712" label="GMPPA" cy:nodeId="105787">
    <graphics y="-1123.192922291234" z="0.0" x="-573.5649799573421"/>
  </node>
  <node id="136729" label="CREBBP" cy:nodeId="105790">
    <graphics y="485.810251536891" z="0.0" x="319.6308818590642"/>
  </node>
  <node id="136640" label="POFUT1" cy:nodeId="105792">
    <graphics y="1157.4793189197035" z="0.0" x="925.6414409410954"/>
  </node>
  <node id="136754" label="COG7" cy:nodeId="105791">
    <graphics y="-189.7151543468981" z="0.0" x="901.7940898668767"/>
  </node>
  <node id="136725" label="CTNNB1" cy:nodeId="105794">
    <graphics y="397.7766211657972" z="0.0" x="143.81905324578292"/>
  </node>
  <node id="136715" label="DEK" cy:nodeId="105795">
    <graphics y="617.7937110095472" z="0.0" x="738.6028667223454"/>
  </node>
  <node id="136675" label="SLC35B1" cy:nodeId="105798">
    <graphics y="-1629.622121509984" z="0.0" x="-366.3873676526546"/>
  </node>
  <node id="136779" label="ALG3" cy:nodeId="105797">
    <graphics y="-835.5031639904528" z="0.0" x="-1395.614052222967"/>
  </node>
  <node id="136693" label="KHK" cy:nodeId="105800">
    <graphics y="-1354.956838306859" z="0.0" x="207.86998708367355"/>
  </node>
  <node id="136704" label="FUT1" cy:nodeId="105802">
    <graphics y="180.4544928698988" z="0.0" x="-183.1258777844905"/>
  </node>
  <node id="136709" label="EBF1" cy:nodeId="105804">
    <graphics y="432.4597266345472" z="0.0" x="-218.38321726202958"/>
  </node>
  <node id="136683" label="ST3GAL2" cy:nodeId="105806">
    <graphics y="-17.916932758763323" z="0.0" x="-57.08537428259842"/>
  </node>
  <node id="136708" label="CSGALNACT1" cy:nodeId="105805">
    <graphics y="380.3030493884535" z="0.0" x="-119.82541696906083"/>
  </node>
  <node id="136518" label="CHST3" cy:nodeId="105807">
    <graphics y="249.5400183825941" z="0.0" x="-1288.406532691717"/>
  </node>
  <node id="136838" label="AHR" cy:nodeId="106836">
    <graphics y="995.549509349391" z="0.0" x="194.43346364617355"/>
  </node>
  <node id="136533" label="PIGK" cy:nodeId="106835">
    <graphics y="725.0263770251722" z="0.0" x="1149.181846214533"/>
  </node>
  <node id="136766" label="B3GNT2" cy:nodeId="106838">
    <graphics y="503.2910864978285" z="0.0" x="66.21097524285324"/>
  </node>
  <node id="136747" label="TPST2" cy:nodeId="106840">
    <graphics y="-8.550214466526995" z="0.0" x="-1220.034218238592"/>
  </node>
  <node id="136726" label="ST6GALNAC3" cy:nodeId="105815">
    <graphics y="256.31937629275035" z="0.0" x="39.26923329949386"/>
  </node>
  <node id="136574" label="B3GALT1" cy:nodeId="105818">
    <graphics y="832.5618384509535" z="0.0" x="-297.10511057257645"/>
  </node>
  <node id="136697" label="SLC35E1" cy:nodeId="106844">
    <graphics y="786.432077708766" z="0.0" x="603.0122905504704"/>
  </node>
  <node id="136585" label="LFNG" cy:nodeId="106846">
    <graphics y="-436.0070702404528" z="0.0" x="-642.4164203870296"/>
  </node>
  <node id="136703" label="ELF1" cy:nodeId="105822">
    <graphics y="542.633982005641" z="0.0" x="117.10243947625167"/>
  </node>
  <node id="136817" label="COG6" cy:nodeId="105824">
    <graphics y="449.01285773806285" z="0.0" x="763.5536113512517"/>
  </node>
  <node id="136764" label="COG3" cy:nodeId="105823">
    <graphics y="-114.03550499387075" z="0.0" x="474.6534038317204"/>
  </node>
  <node id="136700" label="ELK3" cy:nodeId="105826">
    <graphics y="274.4378760486097" z="0.0" x="-554.3442157971858"/>
  </node>
  <node id="136718" label="DCP1A" cy:nodeId="106850">
    <graphics y="936.3619483142347" z="0.0" x="90.95331533074386"/>
  </node>
  <node id="136701" label="ELF2" cy:nodeId="105825">
    <graphics y="-322.75142448849965" z="0.0" x="752.4757915270329"/>
  </node>
  <node id="136696" label="ELL2" cy:nodeId="106852">
    <graphics y="-314.35640495724965" z="0.0" x="-1235.529823707342"/>
  </node>
  <node id="136699" label="ELK4" cy:nodeId="105827">
    <graphics y="544.4837134509535" z="0.0" x="507.9318462145329"/>
  </node>
  <node id="136752" label="GALT" cy:nodeId="106851">
    <graphics y="-736.7282616467028" z="0.0" x="254.2483440172673"/>
  </node>
  <node id="136690" label="ERCC6" cy:nodeId="105830">
    <graphics y="388.8459265857191" z="0.0" x="359.2903362047673"/>
  </node>
  <node id="136723" label="XYLT1" cy:nodeId="106854">
    <graphics y="424.35257941775035" z="0.0" x="-301.178734229803"/>
  </node>
  <node id="136652" label="MAN1C1" cy:nodeId="106853">
    <graphics y="426.77982551150035" z="0.0" x="-807.4352802503108"/>
  </node>
  <node id="136686" label="ERG" cy:nodeId="105832">
    <graphics y="294.0903113513441" z="0.0" x="-67.10069887518875"/>
  </node>
  <node id="136688" label="ERF" cy:nodeId="105831">
    <graphics y="-201.37874382443715" z="0.0" x="-312.79122202277176"/>
  </node>
  <node id="136665" label="ST8SIA4" cy:nodeId="105834">
    <graphics y="709.3413184314222" z="0.0" x="-349.3379902112483"/>
  </node>
  <node id="136618" label="ST3GAL5" cy:nodeId="106857">
    <graphics y="-324.06734245724965" z="0.0" x="-537.6944660413265"/>
  </node>
  <node id="136651" label="CHSY3" cy:nodeId="105833">
    <graphics y="534.5197852282972" z="0.0" x="-462.71460764288895"/>
  </node>
  <node id="136720" label="MGAT4A" cy:nodeId="106860">
    <graphics y="477.2198584704847" z="0.0" x="386.4940715563298"/>
  </node>
  <node id="136514" label="GALNT7" cy:nodeId="106859">
    <graphics y="400.34025031618785" z="0.0" x="-1126.1459125745296"/>
  </node>
  <node id="136682" label="CHST7" cy:nodeId="105835">
    <graphics y="499.6365454822035" z="0.0" x="-367.0991901624202"/>
  </node>
  <node id="136705" label="CHST2" cy:nodeId="105838">
    <graphics y="607.2024024157972" z="0.0" x="-486.00257151007645"/>
  </node>
  <node id="136519" label="CHST15" cy:nodeId="106861">
    <graphics y="330.7168677478285" z="0.0" x="-1215.719765113592"/>
  </node>
  <node id="136679" label="GPI" cy:nodeId="106864">
    <graphics y="-1569.7445580334215" z="0.0" x="-498.05408518195145"/>
  </node>
  <node id="136781" label="ST8SIA1" cy:nodeId="105840">
    <graphics y="-500.3720909924059" z="0.0" x="-956.8219990003108"/>
  </node>
  <node id="136672" label="ETS1" cy:nodeId="105839">
    <graphics y="294.7073767810316" z="0.0" x="77.58460195183761"/>
  </node>
  <node id="136689" label="HS3ST3B1" cy:nodeId="105841">
    <graphics y="46.374468150660505" z="0.0" x="397.9287639391423"/>
  </node>
  <node id="136451" label="MGAT2" cy:nodeId="106868">
    <graphics y="-75.28219383664418" z="0.0" x="979.7123637926579"/>
  </node>
  <node id="136749" label="EXTL2" cy:nodeId="105844">
    <graphics y="307.2283423572035" z="0.0" x="4.4388957750798"/>
  </node>
  <node id="136624" label="ARSB" cy:nodeId="105843">
    <graphics y="-1203.941457447484" z="0.0" x="756.5558696520329"/>
  </node>
  <node id="136629" label="HIF1A" cy:nodeId="106867">
    <graphics y="512.9793799548597" z="0.0" x="-5.718536781072544"/>
  </node>
  <node id="136670" label="EZH1" cy:nodeId="105846">
    <graphics y="-423.3531700939684" z="0.0" x="278.8381877672673"/>
  </node>
  <node id="136507" label="SLC35B4" cy:nodeId="105845">
    <graphics y="1068.596872630641" z="0.0" x="334.56542165398605"/>
  </node>
  <node id="136810" label="GALC" cy:nodeId="106869">
    <graphics y="296.64383918337535" z="0.0" x="823.4619365465642"/>
  </node>
  <node id="136612" label="IRF3" cy:nodeId="106872">
    <graphics y="-857.8824974865465" z="0.0" x="-174.05265085577958"/>
  </node>
  <node id="136666" label="FLI1" cy:nodeId="105848">
    <graphics y="368.9809668689222" z="0.0" x="-172.8109058606624"/>
  </node>
  <node id="136613" label="IRF2" cy:nodeId="106871">
    <graphics y="-142.4551750988512" z="0.0" x="-960.6987690198421"/>
  </node>
  <node id="136600" label="KDM1B" cy:nodeId="106873">
    <graphics y="702.771677318141" z="0.0" x="-211.18462412238114"/>
  </node>
  <node id="136450" label="PIGH" cy:nodeId="105852">
    <graphics y="23.326277080103864" z="0.0" x="1053.8194194567204"/>
  </node>
  <node id="136822" label="GLCE" cy:nodeId="105851">
    <graphics y="802.3762915759535" z="0.0" x="910.0347514879704"/>
  </node>
  <node id="136573" label="MEIS3" cy:nodeId="106878">
    <graphics y="-172.0005547375231" z="0.0" x="-67.52071063399308"/>
  </node>
  <node id="136542" label="POU2F2" cy:nodeId="106880">
    <graphics y="-8.784818348362933" z="0.0" x="-1000.3870624768733"/>
  </node>
  <node id="136661" label="FOXO1" cy:nodeId="105856">
    <graphics y="470.09928351931285" z="0.0" x="133.946021629572"/>
  </node>
  <node id="136721" label="GNPNAT1" cy:nodeId="105855">
    <graphics y="315.77616340212535" z="0.0" x="208.97557790398605"/>
  </node>
  <node id="136543" label="GFPT1" cy:nodeId="106882">
    <graphics y="970.2100318103285" z="0.0" x="436.5538554918767"/>
  </node>
  <node id="136659" label="FOXP3" cy:nodeId="105858">
    <graphics y="-470.3209130138903" z="0.0" x="-815.2968525159358"/>
  </node>
  <node id="136535" label="RARA" cy:nodeId="106884">
    <graphics y="-488.6602990002184" z="0.0" x="-23.721542762517856"/>
  </node>
  <node id="136617" label="NPL" cy:nodeId="105860">
    <graphics y="1.0298026233167548" z="0.0" x="-777.8159565198421"/>
  </node>
  <node id="136719" label="SULF1" cy:nodeId="106883">
    <graphics y="404.707712474391" z="0.0" x="-411.5398639905452"/>
  </node>
  <node id="136786" label="HK3" cy:nodeId="105859">
    <graphics y="-590.1137596935778" z="0.0" x="-811.1796039807796"/>
  </node>
  <node id="136504" label="SMAD2" cy:nodeId="106886">
    <graphics y="246.77588874392222" z="0.0" x="697.0877300035954"/>
  </node>
  <node id="136654" label="GATA6" cy:nodeId="105862">
    <graphics y="508.4763281970472" z="0.0" x="-678.9905170667171"/>
  </node>
  <node id="136658" label="GABPA" cy:nodeId="105861">
    <graphics y="657.3639014392347" z="0.0" x="581.4474712145329"/>
  </node>
  <node id="136649" label="ALG13" cy:nodeId="105864">
    <graphics y="-1013.1495873302965" z="0.0" x="271.9663921129704"/>
  </node>
  <node id="136650" label="GATAD1" cy:nodeId="105863">
    <graphics y="-813.836232838109" z="0.0" x="143.5048137438298"/>
  </node>
  <node id="136644" label="GLYR1" cy:nodeId="105866">
    <graphics y="228.3553259997816" z="0.0" x="934.5631938707829"/>
  </node>
  <node id="136471" label="TBX21" cy:nodeId="106889">
    <graphics y="-643.9349266857653" z="0.0" x="-1063.5152973401546"/>
  </node>
  <node id="136647" label="GLI2" cy:nodeId="105865">
    <graphics y="-225.5567375988512" z="0.0" x="13.488112999200894"/>
  </node>
  <node id="136735" label="COG4" cy:nodeId="106892">
    <graphics y="-1297.4782006115465" z="0.0" x="-82.83645765662186"/>
  </node>
  <node id="136824" label="COG8" cy:nodeId="106891">
    <graphics y="604.244333568141" z="0.0" x="888.8490215075017"/>
  </node>
  <node id="136449" label="ZBTB10" cy:nodeId="106894">
    <graphics y="927.6771338611097" z="0.0" x="773.5905986559392"/>
  </node>
  <node id="136656" label="CTBS" cy:nodeId="105869">
    <graphics y="1001.8792212634535" z="0.0" x="588.7740703356267"/>
  </node>
  <node id="136730" label="STT3A" cy:nodeId="106893">
    <graphics y="970.5828955798597" z="0.0" x="1149.455527855158"/>
  </node>
  <node id="136641" label="GTF2I" cy:nodeId="105871">
    <graphics y="764.8328955798597" z="0.0" x="743.3462138903142"/>
  </node>
  <node id="136832" label="PIGO" cy:nodeId="105874">
    <graphics y="320.4856055407972" z="0.0" x="697.3289409410954"/>
  </node>
  <node id="136635" label="HECTD1" cy:nodeId="105875">
    <graphics y="381.82291633181285" z="0.0" x="872.0498882067204"/>
  </node>
  <node id="136628" label="HINFP" cy:nodeId="105877">
    <graphics y="-903.6824852795153" z="0.0" x="42.374656273126675"/>
  </node>
  <node id="136801" label="TSTA3" cy:nodeId="105880">
    <graphics y="-953.1776635021715" z="0.0" x="-748.3313373792171"/>
  </node>
  <node id="136620" label="IKZF1" cy:nodeId="105882">
    <graphics y="-221.76863640256215" z="0.0" x="-670.4011615979671"/>
  </node>
  <node id="136702" label="LIPA" cy:nodeId="105884">
    <graphics y="219.26688605837535" z="0.0" x="-326.1997760999202"/>
  </node>
  <node id="136619" label="GM2A" cy:nodeId="105883">
    <graphics y="-231.8819023937731" z="0.0" x="-799.2881855237483"/>
  </node>
  <node id="136615" label="INTS3" cy:nodeId="105886">
    <graphics y="-1074.6420189709215" z="0.0" x="-434.9216694104671"/>
  </node>
  <node id="136616" label="INO80" cy:nodeId="105885">
    <graphics y="406.7625525622816" z="0.0" x="1028.8672710192204"/>
  </node>
  <node id="136611" label="IRF4" cy:nodeId="105888">
    <graphics y="-368.89888542599965" z="0.0" x="-828.5349506604671"/>
  </node>
  <node id="136614" label="IRF1" cy:nodeId="105887">
    <graphics y="-757.032766041234" z="0.0" x="-936.6141742932796"/>
  </node>
  <node id="136607" label="IRF8" cy:nodeId="105890">
    <graphics y="-126.40843742795278" z="0.0" x="-654.8861469495296"/>
  </node>
  <node id="136610" label="IRF5" cy:nodeId="105889">
    <graphics y="-1015.0070702404528" z="0.0" x="-582.8448871839046"/>
  </node>
  <node id="136606" label="JMJD1C" cy:nodeId="105892">
    <graphics y="245.60437995485972" z="0.0" x="452.2658916246892"/>
  </node>
  <node id="136604" label="JMJD6" cy:nodeId="105894">
    <graphics y="-1172.8832299084215" z="0.0" x="-257.9328998792171"/>
  </node>
  <node id="136663" label="MGAT5" cy:nodeId="105893">
    <graphics y="860.869333568141" z="0.0" x="474.9605937731267"/>
  </node>
  <node id="136804" label="FKRP" cy:nodeId="105896">
    <graphics y="-360.2101952404528" z="0.0" x="-88.26538698554032"/>
  </node>
  <node id="136787" label="GBGT1" cy:nodeId="105897">
    <graphics y="-642.3455712170153" z="0.0" x="-737.3603290784358"/>
  </node>
  <node id="136601" label="KAT5" cy:nodeId="105900">
    <graphics y="-376.1998802990465" z="0.0" x="483.6925884020329"/>
  </node>
  <node id="136603" label="JUND" cy:nodeId="105899">
    <graphics y="-652.396779713109" z="0.0" x="-403.65039865851395"/>
  </node>
  <node id="136821" label="GNB1" cy:nodeId="105902">
    <graphics y="380.9691260486097" z="0.0" x="239.88613088250167"/>
  </node>
  <node id="136597" label="KDM5A" cy:nodeId="105904">
    <graphics y="662.3399146228285" z="0.0" x="426.94860036492355"/>
  </node>
  <node id="136599" label="KDM3A" cy:nodeId="105903">
    <graphics y="149.86649543337535" z="0.0" x="602.0055766832829"/>
  </node>
  <node id="136767" label="HS2ST1" cy:nodeId="105906">
    <graphics y="873.2049048572035" z="0.0" x="392.8981242907048"/>
  </node>
  <node id="136639" label="GNS" cy:nodeId="105905">
    <graphics y="1004.5425513415785" z="0.0" x="692.2324443590642"/>
  </node>
  <node id="136744" label="B3GALNT2" cy:nodeId="105908">
    <graphics y="24.916887584254255" z="0.0" x="300.8013530504704"/>
  </node>
  <node id="136588" label="LMO2" cy:nodeId="105909">
    <graphics y="101.58414680056285" z="0.0" x="-73.09806601881974"/>
  </node>
  <node id="136587" label="LYL1" cy:nodeId="105911">
    <graphics y="-489.89851921506215" z="0.0" x="-537.4829487073421"/>
  </node>
  <node id="136583" label="MAFB" cy:nodeId="105914">
    <graphics y="102.77091437868785" z="0.0" x="-704.3580097424983"/>
  </node>
  <node id="136677" label="CHST13" cy:nodeId="105913">
    <graphics y="-1308.4664818615465" z="0.0" x="-477.4636615979671"/>
  </node>
  <node id="136608" label="MGAT4B" cy:nodeId="105918">
    <graphics y="-1295.8412377209215" z="0.0" x="-675.5041279065608"/>
  </node>
  <node id="136457" label="B4GALT2" cy:nodeId="105917">
    <graphics y="-1192.467580494359" z="0.0" x="-865.4637226331233"/>
  </node>
  <node id="136580" label="MECOM" cy:nodeId="105919">
    <graphics y="-148.3543679089098" z="0.0" x="81.75424916863449"/>
  </node>
  <node id="136605" label="IDS" cy:nodeId="105922">
    <graphics y="44.238245311305036" z="0.0" x="743.9211040270329"/>
  </node>
  <node id="136579" label="MECP2" cy:nodeId="105921">
    <graphics y="226.1069129138441" z="0.0" x="341.1182475817204"/>
  </node>
  <node id="136578" label="MED1" cy:nodeId="105924">
    <graphics y="321.9851782947035" z="0.0" x="986.5741801989079"/>
  </node>
  <node id="136684" label="NDST1" cy:nodeId="105923">
    <graphics y="247.28315192751597" z="0.0" x="-114.33168833136551"/>
  </node>
  <node id="136575" label="MEF2C" cy:nodeId="105926">
    <graphics y="456.1844275622816" z="0.0" x="-125.79435007452958"/>
  </node>
  <node id="136576" label="MEF2A" cy:nodeId="105925">
    <graphics y="368.0901587634535" z="0.0" x="617.9411845934392"/>
  </node>
  <node id="136799" label="AUTS2" cy:nodeId="107973">
    <graphics y="134.7215369372816" z="0.0" x="775.6369243395329"/>
  </node>
  <node id="136632" label="SLC35F1" cy:nodeId="105927">
    <graphics y="296.5699561267347" z="0.0" x="-192.12288706183426"/>
  </node>
  <node id="136572" label="MITF" cy:nodeId="105929">
    <graphics y="1145.555124583766" z="0.0" x="650.9716411364079"/>
  </node>
  <node id="136571" label="MRE11A" cy:nodeId="105931">
    <graphics y="235.99585944704722" z="0.0" x="256.4590373766423"/>
  </node>
  <node id="136569" label="MXD3" cy:nodeId="105933">
    <graphics y="-1171.1449486584215" z="0.0" x="-152.5196995007991"/>
  </node>
  <node id="136788" label="CTSA" cy:nodeId="107984">
    <graphics y="-975.868703541234" z="0.0" x="-895.5889667737483"/>
  </node>
  <node id="136782" label="SLC35C2" cy:nodeId="107986">
    <graphics y="-877.5797631115465" z="0.0" x="-699.4716572034358"/>
  </node>
  <node id="136567" label="MYH11" cy:nodeId="105937">
    <graphics y="466.5849402575941" z="0.0" x="-598.9441913831233"/>
  </node>
  <node id="136713" label="E2F4" cy:nodeId="107987">
    <graphics y="-932.6954857677965" z="0.0" x="-457.8492206799983"/>
  </node>
  <node id="136563" label="MZF1" cy:nodeId="105942">
    <graphics y="-640.0465599865465" z="0.0" x="-56.217523025274204"/>
  </node>
  <node id="136566" label="B4GALNT1" cy:nodeId="107990">
    <graphics y="367.12638312868785" z="0.0" x="-905.7936176526546"/>
  </node>
  <node id="136562" label="NFATC1" cy:nodeId="105944">
    <graphics y="-275.5992333263903" z="0.0" x="-138.1059498059749"/>
  </node>
  <node id="136648" label="GLI1" cy:nodeId="107991">
    <graphics y="654.5006201892347" z="0.0" x="-648.7021869885921"/>
  </node>
  <node id="136560" label="NFYC" cy:nodeId="105946">
    <graphics y="-867.1508690685778" z="0.0" x="490.9549175035954"/>
  </node>
  <node id="136561" label="NFIC" cy:nodeId="105945">
    <graphics y="696.4541114001722" z="0.0" x="749.4361797106267"/>
  </node>
  <node id="136630" label="HEYL" cy:nodeId="107993">
    <graphics y="812.993601146266" z="0.0" x="-566.8283161389827"/>
  </node>
  <node id="136467" label="HS6ST1" cy:nodeId="107996">
    <graphics y="4.872938457056989" z="0.0" x="-501.5693744885921"/>
  </node>
  <node id="136557" label="NPAT" cy:nodeId="105948">
    <graphics y="521.8941138415785" z="0.0" x="1055.3582378160954"/>
  </node>
  <node id="136559" label="NIPBL" cy:nodeId="105947">
    <graphics y="910.0797217517347" z="0.0" x="524.6786113512517"/>
  </node>
  <node id="136626" label="HNF4A" cy:nodeId="107995">
    <graphics y="-1066.968068775609" z="0.0" x="620.5554424059392"/>
  </node>
  <node id="136643" label="SLC35D1" cy:nodeId="105950">
    <graphics y="642.918405833766" z="0.0" x="810.4132915270329"/>
  </node>
  <node id="136554" label="NR2C2" cy:nodeId="105949">
    <graphics y="182.95795661501597" z="0.0" x="390.9248882067204"/>
  </node>
  <node id="136598" label="KDM4C" cy:nodeId="107997">
    <graphics y="234.67896491579722" z="0.0" x="527.8572002184392"/>
  </node>
  <node id="136553" label="NR2F1" cy:nodeId="105951">
    <graphics y="195.4818671374769" z="0.0" x="-440.7264789807796"/>
  </node>
  <node id="136785" label="NANS" cy:nodeId="108002">
    <graphics y="-813.1346947521715" z="0.0" x="-1128.1263813245296"/>
  </node>
  <node id="136549" label="PBX1" cy:nodeId="105953">
    <graphics y="438.4131568103285" z="0.0" x="435.4662090075017"/>
  </node>
  <node id="136547" label="PHF20" cy:nodeId="105956">
    <graphics y="1267.0886939197035" z="0.0" x="877.7356181871892"/>
  </node>
  <node id="136516" label="B3GNT7" cy:nodeId="108004">
    <graphics y="292.518015208766" z="0.0" x="-1071.3993305432796"/>
  </node>
  <node id="136548" label="PCGF1" cy:nodeId="105955">
    <graphics y="-1365.3734642834215" z="0.0" x="-309.66085092902176"/>
  </node>
  <node id="136546" label="PIAS1" cy:nodeId="105958">
    <graphics y="573.6892798572035" z="0.0" x="556.9127422106267"/>
  </node>
  <node id="136581" label="MAFK" cy:nodeId="108006">
    <graphics y="-716.9472557873278" z="0.0" x="-124.89916269659989"/>
  </node>
  <node id="136532" label="SLC17A5" cy:nodeId="108005">
    <graphics y="750.5718482165785" z="0.0" x="1031.456504417658"/>
  </node>
  <node id="136544" label="POLR3A" cy:nodeId="105960">
    <graphics y="773.658640208766" z="0.0" x="458.4667583239079"/>
  </node>
  <node id="136771" label="CHPF2" cy:nodeId="108007">
    <graphics y="-1069.3209740490465" z="0.0" x="-841.3195575940608"/>
  </node>
  <node id="136537" label="PRDM1" cy:nodeId="105962">
    <graphics y="486.361032786891" z="0.0" x="-177.89482920050614"/>
  </node>
  <node id="136706" label="CHST1" cy:nodeId="108010">
    <graphics y="330.43668586306285" z="0.0" x="-326.7625507581233"/>
  </node>
  <node id="136540" label="PPARG" cy:nodeId="105961">
    <graphics y="85.06354743532847" z="0.0" x="-390.0326313245296"/>
  </node>
  <node id="136565" label="CHST8" cy:nodeId="108011">
    <graphics y="622.5214942126722" z="0.0" x="-860.2860492932796"/>
  </node>
  <node id="136631" label="UGGT2" cy:nodeId="105966">
    <graphics y="714.5874732165785" z="0.0" x="-471.1660541760921"/>
  </node>
  <node id="136534" label="RB1" cy:nodeId="105965">
    <graphics y="545.4776709704847" z="0.0" x="665.9665141832829"/>
  </node>
  <node id="136528" label="RBL2" cy:nodeId="105968">
    <graphics y="540.2182715564222" z="0.0" x="734.5315776598454"/>
  </node>
  <node id="136558" label="NOTCH1" cy:nodeId="108016">
    <graphics y="156.91243964724254" z="0.0" x="-104.46211283087723"/>
  </node>
  <node id="136531" label="RBBP5" cy:nodeId="105967">
    <graphics y="635.3701270251722" z="0.0" x="477.3113017809392"/>
  </node>
  <node id="136524" label="REST" cy:nodeId="105970">
    <graphics y="618.6340430407972" z="0.0" x="1110.4051128160954"/>
  </node>
  <node id="136814" label="PIGV" cy:nodeId="111090">
    <graphics y="-138.2152764172106" z="0.0" x="761.9092632067204"/>
  </node>
  <node id="136527" label="RCOR1" cy:nodeId="105969">
    <graphics y="300.408396068141" z="0.0" x="331.6568828356267"/>
  </node>
  <node id="136552" label="NR2F2" cy:nodeId="108017">
    <graphics y="576.7072852282972" z="0.0" x="-324.1229175794124"/>
  </node>
  <node id="136776" label="BCL3" cy:nodeId="111092">
    <graphics y="-891.620168384984" z="0.0" x="-628.4502338635921"/>
  </node>
  <node id="136803" label="ATF5" cy:nodeId="111091">
    <graphics y="-788.6774193615465" z="0.0" x="-787.2620014417171"/>
  </node>
  <node id="136522" label="RFX7" cy:nodeId="105974">
    <graphics y="1039.982370677516" z="0.0" x="30.134124351739956"/>
  </node>
  <node id="136529" label="RBL1" cy:nodeId="108022">
    <graphics y="1148.814401927516" z="0.0" x="263.10326345086105"/>
  </node>
  <node id="136750" label="CD59" cy:nodeId="111094">
    <graphics y="291.85441047243785" z="0.0" x="-267.8503193128108"/>
  </node>
  <node id="136536" label="PRDM4" cy:nodeId="108021">
    <graphics y="1127.005319896266" z="0.0" x="480.4617534410954"/>
  </node>
  <node id="136638" label="COG2" cy:nodeId="105973">
    <graphics y="1053.497019115016" z="0.0" x="1029.341514183283"/>
  </node>
  <node id="136758" label="CAMTA2" cy:nodeId="111093">
    <graphics y="-1517.4486595959215" z="0.0" x="-1076.9110492932796"/>
  </node>
  <node id="136525" label="RELA" cy:nodeId="108024">
    <graphics y="-693.5568138927965" z="0.0" x="-570.2124714124202"/>
  </node>
  <node id="136727" label="CTBP2" cy:nodeId="111096">
    <graphics y="132.9658759265394" z="0.0" x="233.95552785515792"/>
  </node>
  <node id="136815" label="FPGT" cy:nodeId="105976">
    <graphics y="531.8612158923597" z="0.0" x="828.1726299059392"/>
  </node>
  <node id="136521" label="RNF2" cy:nodeId="105975">
    <graphics y="515.4212134509535" z="0.0" x="216.01235158562667"/>
  </node>
  <node id="136669" label="POMT2" cy:nodeId="108023">
    <graphics y="-277.0416924328356" z="0.0" x="424.6597209703923"/>
  </node>
  <node id="136731" label="CREB3L2" cy:nodeId="111095">
    <graphics y="841.1452735095472" z="0.0" x="1084.7522807848454"/>
  </node>
  <node id="136520" label="RUNX1" cy:nodeId="105978">
    <graphics y="149.29076606325816" z="0.0" x="-953.1048969495296"/>
  </node>
  <node id="136671" label="ETS2" cy:nodeId="111098">
    <graphics y="-75.59309166379262" z="0.0" x="-225.3334430921077"/>
  </node>
  <node id="136783" label="GLA" cy:nodeId="108026">
    <graphics y="-655.7567040295153" z="0.0" x="-1231.037147926092"/>
  </node>
  <node id="136695" label="EMX1" cy:nodeId="111097">
    <graphics y="-1225.386281666234" z="0.0" x="80.90058095574386"/>
  </node>
  <node id="136655" label="GATA2" cy:nodeId="111100">
    <graphics y="52.46229011110972" z="0.0" x="-138.72269480109208"/>
  </node>
  <node id="136526" label="PIGA" cy:nodeId="108027">
    <graphics y="72.48192817263316" z="0.0" x="647.7771220934392"/>
  </node>
  <node id="136668" label="A4GNT" cy:nodeId="111099">
    <graphics y="-579.2485253185778" z="0.0" x="483.0065532457829"/>
  </node>
  <node id="136512" label="RUNX3" cy:nodeId="105982">
    <graphics y="-230.2107903332262" z="0.0" x="-1058.3673481214046"/>
  </node>
  <node id="136627" label="HMGN3" cy:nodeId="111102">
    <graphics y="-1443.2247826427965" z="0.0" x="-691.5553974378108"/>
  </node>
  <node id="136484" label="STAT5B" cy:nodeId="108029">
    <graphics y="392.7532447009535" z="0.0" x="559.0539165270329"/>
  </node>
  <node id="136513" label="RUNX2" cy:nodeId="105981">
    <graphics y="5.932188334986677" z="0.0" x="-1454.469520972967"/>
  </node>
  <node id="136634" label="HES1" cy:nodeId="111101">
    <graphics y="-31.41161840863515" z="0.0" x="-292.8071674573421"/>
  </node>
  <node id="136506" label="SIN3A" cy:nodeId="105984">
    <graphics y="579.4266455798597" z="0.0" x="468.9728008043767"/>
  </node>
  <node id="136621" label="HOXC9" cy:nodeId="111104">
    <graphics y="-738.3368431896715" z="0.0" x="-320.11280100226395"/>
  </node>
  <node id="136469" label="TCF21" cy:nodeId="108031">
    <graphics y="389.43180305056285" z="0.0" x="-525.5644916760921"/>
  </node>
  <node id="136622" label="HOXC6" cy:nodeId="111103">
    <graphics y="-877.523244556859" z="0.0" x="-893.1574482190608"/>
  </node>
  <node id="136515" label="B3GALT5" cy:nodeId="108034">
    <graphics y="137.80994636110972" z="0.0" x="-1255.9811176526546"/>
  </node>
  <node id="136593" label="KLF10" cy:nodeId="111106">
    <graphics y="532.5689795642347" z="0.0" x="1166.5779643785954"/>
  </node>
  <node id="136609" label="ARSA" cy:nodeId="111105">
    <graphics y="-1313.000051197484" z="0.0" x="-785.5082782971858"/>
  </node>
  <node id="136834" label="UGCG" cy:nodeId="105985">
    <graphics y="599.4631446032972" z="0.0" x="405.19701345086105"/>
  </node>
  <node id="136501" label="SMARCC2" cy:nodeId="105988">
    <graphics y="-536.6451012463122" z="0.0" x="104.60744435906417"/>
  </node>
  <node id="136568" label="MXI1" cy:nodeId="111108">
    <graphics y="413.20755988650035" z="0.0" x="812.0667949450017"/>
  </node>
  <node id="136464" label="TEAD4" cy:nodeId="108035">
    <graphics y="136.61280280642222" z="0.0" x="-1096.354774879217"/>
  </node>
  <node id="136502" label="SMAD4" cy:nodeId="105987">
    <graphics y="382.423532786891" z="0.0" x="490.3283305895329"/>
  </node>
  <node id="136570" label="MSC" cy:nodeId="111107">
    <graphics y="-1041.4201561779528" z="0.0" x="-1023.0168842542171"/>
  </node>
  <node id="136541" label="POU5F1" cy:nodeId="111110">
    <graphics y="-1050.1395165295153" z="0.0" x="-103.82415048956864"/>
  </node>
  <node id="136485" label="GMPPB" cy:nodeId="108038">
    <graphics y="-451.35689323849965" z="0.0" x="-1269.414833472967"/>
  </node>
  <node id="136498" label="SMC3" cy:nodeId="105990">
    <graphics y="497.5532324939222" z="0.0" x="531.3661723864079"/>
  </node>
  <node id="136500" label="SMC1A" cy:nodeId="105989">
    <graphics y="720.0872290759535" z="0.0" x="414.07897145867355"/>
  </node>
  <node id="136551" label="NR4A1" cy:nodeId="111109">
    <graphics y="-523.4571129650622" z="0.0" x="-119.73744623541825"/>
  </node>
  <node id="136495" label="SOX17" cy:nodeId="105992">
    <graphics y="209.3733161120863" z="0.0" x="-249.4632801282405"/>
  </node>
  <node id="136494" label="SLC35E4" cy:nodeId="111112">
    <graphics y="228.49015265993785" z="0.0" x="-769.2929462659358"/>
  </node>
  <node id="136539" label="PRAME" cy:nodeId="111111">
    <graphics y="-934.543996509984" z="0.0" x="-1644.6420063245296"/>
  </node>
  <node id="136473" label="TBL1XR1" cy:nodeId="111114">
    <graphics y="502.6757910876722" z="0.0" x="976.5191264879704"/>
  </node>
  <node id="136474" label="TBL1X" cy:nodeId="111113">
    <graphics y="153.6180213122816" z="0.0" x="854.6169048082829"/>
  </node>
  <node id="136492" label="SRF" cy:nodeId="105996">
    <graphics y="-181.4422356457262" z="0.0" x="-186.71480600714676"/>
  </node>
  <node id="136460" label="TTF1" cy:nodeId="111116">
    <graphics y="-27.755098995640765" z="0.0" x="-389.66040842413895"/>
  </node>
  <node id="136472" label="B3GALNT1" cy:nodeId="111115">
    <graphics y="573.9627173572035" z="0.0" x="1338.347129417658"/>
  </node>
  <node id="136828" label="GANAB" cy:nodeId="105998">
    <graphics y="823.1848242907972" z="0.0" x="655.3265605700017"/>
  </node>
  <node id="136453" label="YBX1" cy:nodeId="111117">
    <graphics y="-1163.688039478734" z="0.0" x="-992.5073017346858"/>
  </node>
  <node id="136490" label="HPSE" cy:nodeId="106000">
    <graphics y="59.400224986598005" z="0.0" x="-907.1157001721858"/>
  </node>
  <node id="136491" label="STAT1" cy:nodeId="105999">
    <graphics y="-81.44814842648793" z="0.0" x="-747.4391254651546"/>
  </node>
  <node id="136487" label="STAT4" cy:nodeId="106002">
    <graphics y="-579.0214745373278" z="0.0" x="-902.9852070081233"/>
  </node>
  <node id="136489" label="STAT2" cy:nodeId="106001">
    <graphics y="-464.1442162365465" z="0.0" x="-377.0641559827327"/>
  </node>
  <node id="136482" label="SUMO2" cy:nodeId="106004">
    <graphics y="1418.8560279040785" z="0.0" x="-1698.7729801404475"/>
  </node>
  <node id="136486" label="STAT5A" cy:nodeId="106003">
    <graphics y="-401.1058251232653" z="0.0" x="-985.6355976331233"/>
  </node>
  <node id="136477" label="TAF1" cy:nodeId="106006">
    <graphics y="168.0023444323988" z="0.0" x="480.1228252184392"/>
  </node>
  <node id="136645" label="COG1" cy:nodeId="106005">
    <graphics y="-1061.2091576427965" z="0.0" x="411.17308766961105"/>
  </node>
  <node id="136470" label="TCF12" cy:nodeId="106007">
    <graphics y="580.7656348376722" z="0.0" x="208.17296559929855"/>
  </node>
  <node id="136466" label="TCF7L2" cy:nodeId="106010">
    <graphics y="141.98571235232066" z="0.0" x="-289.1443256604671"/>
  </node>
  <node id="136468" label="TCF7L1" cy:nodeId="106009">
    <graphics y="121.61420661501597" z="0.0" x="-225.4050983655452"/>
  </node>
  <node id="136768" label="GALNT1" cy:nodeId="106014">
    <graphics y="713.793894115016" z="0.0" x="130.099830223322"/>
  </node>
  <node id="136465" label="TEAD1" cy:nodeId="106013">
    <graphics y="472.92508918337535" z="0.0" x="684.2047343981267"/>
  </node>
  <node id="136463" label="TET2" cy:nodeId="106016">
    <graphics y="371.5092871814222" z="0.0" x="424.4895549547673"/>
  </node>
  <node id="136458" label="USF2" cy:nodeId="106022">
    <graphics y="-969.337453541234" z="0.0" x="-646.4627460706233"/>
  </node>
  <node id="136459" label="USF1" cy:nodeId="106021">
    <graphics y="-824.379934009984" z="0.0" x="-540.8116230237483"/>
  </node>
  <node id="136456" label="VEZF1" cy:nodeId="106023">
    <graphics y="511.0905860095472" z="0.0" x="626.5085674059392"/>
  </node>
  <node id="136454" label="YAP1" cy:nodeId="106026">
    <graphics y="736.470896068141" z="0.0" x="331.06713063836105"/>
  </node>
  <node id="136455" label="XRN2" cy:nodeId="106025">
    <graphics y="812.2486670642347" z="0.0" x="532.5221172106267"/>
  </node>
  <node id="136452" label="YY1" cy:nodeId="106028">
    <graphics y="177.5014441638441" z="0.0" x="705.1574321520329"/>
  </node>
  <node id="136584" label="B3GALT4" cy:nodeId="106030">
    <graphics y="-430.5332238049059" z="0.0" x="-480.3790668714046"/>
  </node>
  <node id="136816" label="ASH2L" cy:nodeId="107273">
    <graphics y="349.0055945544691" z="0.0" x="771.7036968004704"/>
  </node>
  <node id="136765" label="BRD2" cy:nodeId="107276">
    <graphics y="-169.26558464474965" z="0.0" x="333.09801442742355"/>
  </node>
  <node id="136829" label="FUT10" cy:nodeId="107278">
    <graphics y="441.232858958766" z="0.0" x="513.4034648668767"/>
  </node>
  <node id="136499" label="B4GALT5" cy:nodeId="107279">
    <graphics y="1192.509958568141" z="0.0" x="375.3047405016423"/>
  </node>
  <node id="136694" label="FUT6" cy:nodeId="107288">
    <graphics y="-1472.743215259984" z="0.0" x="145.9014659655095"/>
  </node>
  <node id="136819" label="ASAH1" cy:nodeId="107290">
    <graphics y="490.786814036891" z="0.0" x="888.4557109606267"/>
  </node>
  <node id="136691" label="ERCC3" cy:nodeId="107292">
    <graphics y="-1111.0045677990465" z="0.0" x="155.261695457697"/>
  </node>
  <node id="136724" label="PAPSS1" cy:nodeId="107291">
    <graphics y="633.8447364001722" z="0.0" x="-13.378296302556919"/>
  </node>
  <node id="136820" label="GCNT2" cy:nodeId="107296">
    <graphics y="926.2635596423597" z="0.0" x="968.2287212145329"/>
  </node>
  <node id="136664" label="FOSL2" cy:nodeId="107295">
    <graphics y="773.7170508532972" z="0.0" x="208.7046428453923"/>
  </node>
  <node id="136662" label="FOXK1" cy:nodeId="107298">
    <graphics y="299.0970557361097" z="0.0" x="-432.8077778089046"/>
  </node>
  <node id="136831" label="GNE" cy:nodeId="107297">
    <graphics y="308.8314002185316" z="0.0" x="607.2754741442204"/>
  </node>
  <node id="136722" label="EXTL3" cy:nodeId="107299">
    <graphics y="194.1905768542738" z="0.0" x="-22.24561350226395"/>
  </node>
  <node id="136746" label="GALNT2" cy:nodeId="107306">
    <graphics y="-106.46897667355825" z="0.0" x="-1155.7489399182796"/>
  </node>
  <node id="136623" label="HOXA6" cy:nodeId="107308">
    <graphics y="333.7714636950941" z="0.0" x="1141.2806010973454"/>
  </node>
  <node id="136681" label="EXT2" cy:nodeId="107307">
    <graphics y="563.0631201892347" z="0.0" x="-225.87566416144364"/>
  </node>
  <node id="136602" label="KAT2B" cy:nodeId="107312">
    <graphics y="443.7779029040785" z="0.0" x="573.4019389879704"/>
  </node>
  <node id="136595" label="KDM5C" cy:nodeId="107314">
    <graphics y="-321.0202538342028" z="0.0" x="189.50466115593917"/>
  </node>
  <node id="136592" label="KLF11" cy:nodeId="107316">
    <graphics y="313.824655833766" z="0.0" x="483.7895122301579"/>
  </node>
  <node id="136594" label="KDM6B" cy:nodeId="107315">
    <graphics y="-301.8526512951403" z="0.0" x="519.8344341051579"/>
  </node>
  <node id="136590" label="KLF4" cy:nodeId="107317">
    <graphics y="53.33575660280894" z="0.0" x="918.8864970934392"/>
  </node>
  <node id="136589" label="LDB1" cy:nodeId="107320">
    <graphics y="-1015.6879174084215" z="0.0" x="90.23067433953292"/>
  </node>
  <node id="136577" label="MED12" cy:nodeId="107324">
    <graphics y="298.07401496462535" z="0.0" x="403.3887553942204"/>
  </node>
  <node id="136716" label="POFUT2" cy:nodeId="107327">
    <graphics y="-803.7864891857653" z="0.0" x="-236.99138681769364"/>
  </node>
  <node id="136480" label="PIGY" cy:nodeId="107332">
    <graphics y="1367.0886939197035" z="0.0" x="-1604.8089298474788"/>
  </node>
  <node id="136550" label="NRF1" cy:nodeId="107333">
    <graphics y="-336.3683983654528" z="0.0" x="106.5094524157048"/>
  </node>
  <node id="136545" label="PML" cy:nodeId="107336">
    <graphics y="-1187.402639088109" z="0.0" x="-740.5759662854671"/>
  </node>
  <node id="136511" label="RYBP" cy:nodeId="107338">
    <graphics y="396.26761848025035" z="0.0" x="85.96219594597824"/>
  </node>
  <node id="136625" label="MPI" cy:nodeId="107340">
    <graphics y="-505.8672997326403" z="0.0" x="738.4863506090642"/>
  </node>
  <node id="136509" label="SETDB1" cy:nodeId="107339">
    <graphics y="-575.5335594982653" z="0.0" x="279.3810344469548"/>
  </node>
  <node id="136503" label="SMAD3" cy:nodeId="107342">
    <graphics y="-372.3177697033434" z="0.0" x="375.5697856676579"/>
  </node>
  <node id="136505" label="SMAD1" cy:nodeId="107341">
    <graphics y="381.08512336306285" z="0.0" x="-19.45735208868973"/>
  </node>
  <node id="136493" label="SP2" cy:nodeId="107346">
    <graphics y="98.88862067751597" z="0.0" x="513.8314433825017"/>
  </node>
  <node id="136483" label="STAT6" cy:nodeId="107348">
    <graphics y="-669.7165428967028" z="0.0" x="347.1455302965642"/>
  </node>
  <node id="136488" label="STAT3" cy:nodeId="107347">
    <graphics y="625.5064795642347" z="0.0" x="354.9430156481267"/>
  </node>
  <node id="136827" label="LAMP2" cy:nodeId="107350">
    <graphics y="895.6858008532972" z="0.0" x="675.2213969957829"/>
  </node>
  <node id="136478" label="SVIL" cy:nodeId="107349">
    <graphics y="0.02496558718394226" z="0.0" x="538.2386089098454"/>
  </node>
  <node id="136476" label="TAF3" cy:nodeId="107351">
    <graphics y="636.2843115954847" z="0.0" x="1011.7395854723454"/>
  </node>
</graph>
