# Supplementary material for: A systems-based framework to computationally describe putative transcription factors and signaling pathways regulating glycan biosynthesis
Source: publisher site journal article supplement (doi:10.3762/bjoc.17.119), 2021-07-22
Supplement: Additional file 2 [file 1860-5397-17-119-S2.cys › CytoscapeSession-2021_03_21-12_01/views/112204-144582-KIRP.xgmml]

<?xml version="1.0" encoding="UTF-8" standalone="yes"?>
<graph id="144582" label="KIRP" cy:view="1" cy:networkId="112204" cy:visualStyle="default" cy:rendererId="org.cytoscape.ding" cy:documentVersion="3.0" xmlns:dc="http://purl.org/dc/elements/1.1/" xmlns:xlink="http://www.w3.org/1999/xlink" xmlns:rdf="http://www.w3.org/1999/02/22-rdf-syntax-ns#" xmlns:cy="http://www.cytoscape.org" xmlns="http://www.cs.rpi.edu/XGMML">
  <graphics>
    <att name="NETWORK_NODE_SELECTION" value="true" type="string" cy:type="String"/>
    <att name="NETWORK_CENTER_X_LOCATION" value="-19.2886962890625" type="string" cy:type="String"/>
    <att name="NETWORK_HEIGHT" value="510.0" type="string" cy:type="String"/>
    <att name="NETWORK_TITLE" value="KIRP" type="string" cy:type="String"/>
    <att name="NETWORK_EDGE_SELECTION" value="true" type="string" cy:type="String"/>
    <att name="NETWORK_CENTER_Y_LOCATION" value="-26.553466796875" type="string" cy:type="String"/>
    <att name="NETWORK_WIDTH" value="1312.0" type="string" cy:type="String"/>
    <att name="NETWORK_DEPTH" value="0.0" type="string" cy:type="String"/>
    <att name="NETWORK_SCALE_FACTOR" value="0.11200663029444474" type="string" cy:type="String"/>
    <att name="NETWORK_ANNOTATION_SELECTION" value="false" type="string" cy:type="String"/>
    <att name="NETWORK_CENTER_Z_LOCATION" value="0.0" type="string" cy:type="String"/>
  </graphics>
  <node id="144650" label="RBL2" cy:nodeId="105968">
    <graphics y="123.02861262071929" z="0.0" x="217.82563417986194"/>
  </node>
  <node id="144616" label="PIGV" cy:nodeId="111090">
    <graphics y="-636.6867499281088" z="0.0" x="505.99619692400256"/>
  </node>
  <node id="144649" label="REST" cy:nodeId="105970">
    <graphics y="77.95064020860991" z="0.0" x="499.4005548341588"/>
  </node>
  <node id="144664" label="CHST14" cy:nodeId="108018">
    <graphics y="-614.5975775648276" z="0.0" x="-156.6688573972865"/>
  </node>
  <node id="144665" label="NR2F2" cy:nodeId="108017">
    <graphics y="-15.700543873421339" z="0.0" x="115.35766237810412"/>
  </node>
  <node id="144647" label="RFX5" cy:nodeId="105972">
    <graphics y="403.8022027086099" z="0.0" x="367.1187860353307"/>
  </node>
  <node id="144898" label="BCL3" cy:nodeId="111092">
    <graphics y="2092.910326487907" z="0.0" x="-15.832019628731814"/>
  </node>
  <node id="144909" label="ATF5" cy:nodeId="111091">
    <graphics y="914.2396416734537" z="0.0" x="-1111.3968084470912"/>
  </node>
  <node id="144656" label="PRDM4" cy:nodeId="108021">
    <graphics y="305.98109675157866" z="0.0" x="863.5262872560338"/>
  </node>
  <node id="144879" label="CAMTA2" cy:nodeId="111093">
    <graphics y="-953.8589301038901" z="0.0" x="-643.7091863767787"/>
  </node>
  <node id="144918" label="COG2" cy:nodeId="105973">
    <graphics y="413.93834162462554" z="0.0" x="708.1786920411901"/>
  </node>
  <node id="144814" label="CTBP2" cy:nodeId="111096">
    <graphics y="-707.0292792249838" z="0.0" x="279.6799432618932"/>
  </node>
  <node id="144915" label="FPGT" cy:nodeId="105976">
    <graphics y="464.4886040757974" z="0.0" x="628.7382013185338"/>
  </node>
  <node id="144820" label="CREB3L2" cy:nodeId="111095">
    <graphics y="52.43755579698882" z="0.0" x="-150.22369748517713"/>
  </node>
  <node id="144830" label="POMT2" cy:nodeId="108023">
    <graphics y="-486.71973943006196" z="0.0" x="-364.7283819334193"/>
  </node>
  <node id="144800" label="EMX1" cy:nodeId="111097">
    <graphics y="-1257.36869572889" z="0.0" x="-530.5714910642787"/>
  </node>
  <node id="144587" label="PIGA" cy:nodeId="108027">
    <graphics y="231.21107722032866" z="0.0" x="-252.1064336912318"/>
  </node>
  <node id="144621" label="A4GNT" cy:nodeId="111099">
    <graphics y="-184.17759465467134" z="0.0" x="-265.4495885984584"/>
  </node>
  <node id="144609" label="TBP" cy:nodeId="108030">
    <graphics y="-277.4287085462729" z="0.0" x="-305.2467382566615"/>
  </node>
  <node id="144644" label="RUNX3" cy:nodeId="105982">
    <graphics y="1142.131548411735" z="0.0" x="-800.9635809080287"/>
  </node>
  <node id="144617" label="STAT5B" cy:nodeId="108029">
    <graphics y="-355.6680121351401" z="0.0" x="235.72761171892444"/>
  </node>
  <node id="144754" label="HES1" cy:nodeId="111101">
    <graphics y="-617.3596625257651" z="0.0" x="-354.81181699201306"/>
  </node>
  <node id="144733" label="HOXC9" cy:nodeId="111104">
    <graphics y="-1044.80570744764" z="0.0" x="-468.9981573240443"/>
  </node>
  <node id="144606" label="TCF21" cy:nodeId="108031">
    <graphics y="2092.910326487907" z="0.0" x="-814.0993230955287"/>
  </node>
  <node id="144636" label="SIX5" cy:nodeId="105986">
    <graphics y="-1167.40775822889" z="0.0" x="-544.6929205076381"/>
  </node>
  <node id="144711" label="KLF10" cy:nodeId="111106">
    <graphics y="-49.904642038456586" z="0.0" x="-325.71574765607556"/>
  </node>
  <node id="144832" label="B3GALT5" cy:nodeId="108034">
    <graphics y="-104.76188802014985" z="0.0" x="339.15217226579944"/>
  </node>
  <node id="144938" label="UGCG" cy:nodeId="105985">
    <graphics y="143.46551752794585" z="0.0" x="296.5776483400182"/>
  </node>
  <node id="144630" label="SMARCC2" cy:nodeId="105988">
    <graphics y="-418.70872258435884" z="0.0" x="-57.01397425100049"/>
  </node>
  <node id="144924" label="ARNT2" cy:nodeId="108548">
    <graphics y="-467.4395270277182" z="0.0" x="386.6296502931432"/>
  </node>
  <node id="144633" label="SMAD4" cy:nodeId="105987">
    <graphics y="-121.49260472547212" z="0.0" x="142.3435937745885"/>
  </node>
  <node id="144659" label="POU5F1" cy:nodeId="111110">
    <graphics y="-1047.1901068617026" z="0.0" x="-344.20900327130994"/>
  </node>
  <node id="144781" label="GCNT1" cy:nodeId="108552">
    <graphics y="847.4134697984537" z="0.0" x="-235.00598508283338"/>
  </node>
  <node id="144910" label="UGDH" cy:nodeId="108551">
    <graphics y="553.0756402086099" z="0.0" x="639.9200250490026"/>
  </node>
  <node id="144624" label="SRCAP" cy:nodeId="105994">
    <graphics y="-102.15825413953462" z="0.0" x="578.3760797365026"/>
  </node>
  <node id="144687" label="ALG9" cy:nodeId="108554">
    <graphics y="-1039.7433905531088" z="0.0" x="560.0047418458776"/>
  </node>
  <node id="144610" label="TBL1X" cy:nodeId="111113">
    <graphics y="226.50636530626616" z="0.0" x="-39.4127710477992"/>
  </node>
  <node id="144612" label="PIGC" cy:nodeId="108558">
    <graphics y="-1856.1508002210776" z="0.0" x="-733.2238958494349"/>
  </node>
  <node id="144935" label="GANAB" cy:nodeId="105998">
    <graphics y="249.7659478257974" z="0.0" x="218.8896905763463"/>
  </node>
  <node id="144855" label="HPSE" cy:nodeId="106000">
    <graphics y="879.8555474351724" z="0.0" x="-589.2695501463099"/>
  </node>
  <node id="144623" label="STAT1" cy:nodeId="105999">
    <graphics y="316.17003107775054" z="0.0" x="420.2329522950963"/>
  </node>
  <node id="144637" label="GALE" cy:nodeId="108559">
    <graphics y="-1463.8878607679526" z="0.0" x="-746.1320989744349"/>
  </node>
  <node id="144619" label="STAT4" cy:nodeId="106002">
    <graphics y="1004.4311089586099" z="0.0" x="-154.7308691160365"/>
  </node>
  <node id="144622" label="STAT2" cy:nodeId="106001">
    <graphics y="-503.03370427381196" z="0.0" x="-181.68355924054822"/>
  </node>
  <node id="144782" label="GALNT6" cy:nodeId="108561">
    <graphics y="1094.437212474235" z="0.0" x="-681.3823431150599"/>
  </node>
  <node id="144613" label="SUMO2" cy:nodeId="106004">
    <graphics y="-1683.959271900765" z="0.0" x="-636.7007024900599"/>
  </node>
  <node id="144618" label="STAT5A" cy:nodeId="106003">
    <graphics y="550.5230279039224" z="0.0" x="-902.4767645017787"/>
  </node>
  <node id="144788" label="COG1" cy:nodeId="106005">
    <graphics y="-632.7386298109213" z="0.0" x="-62.54993993207654"/>
  </node>
  <node id="144817" label="CSNK2A1" cy:nodeId="108568">
    <graphics y="413.5617241929849" z="0.0" x="493.55186098650256"/>
  </node>
  <node id="144607" label="TCF12" cy:nodeId="106007">
    <graphics y="346.2977776597818" z="0.0" x="103.7205468995885"/>
  </node>
  <node id="144808" label="DOT1L" cy:nodeId="108570">
    <graphics y="-430.26157902967134" z="0.0" x="-701.6898992674037"/>
  </node>
  <node id="144653" label="GALNT1" cy:nodeId="106014">
    <graphics y="-218.8959174085776" z="0.0" x="545.6937066896276"/>
  </node>
  <node id="144603" label="TEAD1" cy:nodeId="106013">
    <graphics y="283.74305964220366" z="0.0" x="274.59992617204944"/>
  </node>
  <node id="144597" label="TET2" cy:nodeId="106016">
    <graphics y="134.69854975450835" z="0.0" x="-19.137656988350955"/>
  </node>
  <node id="144599" label="TERF1" cy:nodeId="106015">
    <graphics y="255.5319085191568" z="0.0" x="480.81052797869006"/>
  </node>
  <node id="144882" label="PIGL" cy:nodeId="108578">
    <graphics y="-804.0099310804526" z="0.0" x="-124.72304898664197"/>
  </node>
  <node id="144591" label="UBTF" cy:nodeId="106020">
    <graphics y="-934.0535101820151" z="0.0" x="-517.5512884275599"/>
  </node>
  <node id="144676" label="ST3GAL1" cy:nodeId="108579">
    <graphics y="1983.61274958361" z="0.0" x="991.7029229982213"/>
  </node>
  <node id="144590" label="USF2" cy:nodeId="106022">
    <graphics y="-633.3866400648276" z="0.0" x="-592.7486150877162"/>
  </node>
  <node id="144588" label="VEZF1" cy:nodeId="106023">
    <graphics y="55.2667260240396" z="0.0" x="140.72588747576037"/>
  </node>
  <node id="144586" label="XRN2" cy:nodeId="106025">
    <graphics y="234.45094538439116" z="0.0" x="374.36521547869006"/>
  </node>
  <node id="144698" label="HEXB" cy:nodeId="108585">
    <graphics y="1441.3748345445474" z="0.0" x="453.2207452638463"/>
  </node>
  <node id="144933" label="GALNT5" cy:nodeId="106027">
    <graphics y="-282.4301428724448" z="0.0" x="680.6444513185338"/>
  </node>
  <node id="144600" label="GAL3ST3" cy:nodeId="108590">
    <graphics y="-707.6894354749838" z="0.0" x="-1201.4431951658412"/>
  </node>
  <node id="144584" label="ZBTB17" cy:nodeId="106029">
    <graphics y="-1115.1012396742026" z="0.0" x="-316.4200323240443"/>
  </node>
  <node id="144768" label="GMEB2" cy:nodeId="108589">
    <graphics y="-1013.0819525648276" z="0.0" x="-751.4289739744349"/>
  </node>
  <node id="144614" label="C1GALT1C1" cy:nodeId="106032">
    <graphics y="2092.910326487907" z="0.0" x="-614.5324972288295"/>
  </node>
  <node id="144756" label="HBP1" cy:nodeId="108591">
    <graphics y="140.24814081896147" z="0.0" x="-211.0477636472865"/>
  </node>
  <node id="144732" label="SULT1A3" cy:nodeId="108594">
    <graphics y="-1166.4918646742026" z="0.0" x="-766.3947942869349"/>
  </node>
  <node id="144744" label="HIRA" cy:nodeId="108595">
    <graphics y="625.8219170640787" z="0.0" x="142.745815454276"/>
  </node>
  <node id="144710" label="KLF15" cy:nodeId="108597">
    <graphics y="780.2129693101724" z="0.0" x="1088.2200128419713"/>
  </node>
  <node id="144679" label="MLLT1" cy:nodeId="108601">
    <graphics y="-148.2507758070151" z="0.0" x="-497.90468198224744"/>
  </node>
  <node id="144671" label="NCOR1" cy:nodeId="108603">
    <graphics y="198.44029474962554" z="0.0" x="-381.7773016111537"/>
  </node>
  <node id="144596" label="B3GAT2" cy:nodeId="108606">
    <graphics y="316.4689507554849" z="0.0" x="-351.2192266599818"/>
  </node>
  <node id="144806" label="CHST5" cy:nodeId="108612">
    <graphics y="-1257.16068791639" z="0.0" x="-678.3979070799037"/>
  </node>
  <node id="144648" label="RFX2" cy:nodeId="108611">
    <graphics y="-577.1518988538901" z="0.0" x="-252.1158788816615"/>
  </node>
  <node id="144642" label="SATB1" cy:nodeId="108614">
    <graphics y="102.01829767931304" z="0.0" x="626.9430353029088"/>
  </node>
  <node id="144641" label="SFMBT1" cy:nodeId="108615">
    <graphics y="528.2790093492349" z="0.0" x="390.91047304704944"/>
  </node>
  <node id="144629" label="SNAPC1" cy:nodeId="108618">
    <graphics y="1018.0153374742349" z="0.0" x="1044.2601739747838"/>
  </node>
  <node id="144628" label="SOX4" cy:nodeId="108620">
    <graphics y="-6.311311237923292" z="0.0" x="-456.24040585920056"/>
  </node>
  <node id="144627" label="SOX9" cy:nodeId="108621">
    <graphics y="-704.8587469984213" z="0.0" x="155.6707422120885"/>
  </node>
  <node id="144595" label="TFE3" cy:nodeId="108625">
    <graphics y="780.4528985093912" z="0.0" x="898.6660577638463"/>
  </node>
  <node id="144592" label="TRRAP" cy:nodeId="108628">
    <graphics y="-4.61220692884126" z="0.0" x="383.86140078142444"/>
  </node>
  <node id="144922" label="ARNTL" cy:nodeId="112214">
    <graphics y="-524.8719000745932" z="0.0" x="958.0525323732213"/>
  </node>
  <node id="144846" label="HEXA" cy:nodeId="112216">
    <graphics y="976.0086236070474" z="0.0" x="-946.4424627439662"/>
  </node>
  <node id="144896" label="BHLHE40" cy:nodeId="112215">
    <graphics y="446.57017756212554" z="0.0" x="-433.62871152326306"/>
  </node>
  <node id="144809" label="DDX5" cy:nodeId="112218">
    <graphics y="-272.4868903089682" z="0.0" x="-455.22075253888806"/>
  </node>
  <node id="144834" label="CHD7" cy:nodeId="112217">
    <graphics y="-172.88071965467134" z="0.0" x="69.65358370378772"/>
  </node>
  <node id="144772" label="GLIS3" cy:nodeId="112220">
    <graphics y="102.2385277818521" z="0.0" x="-479.34779721662244"/>
  </node>
  <node id="144797" label="ESR1" cy:nodeId="112219">
    <graphics y="1147.4844536851724" z="0.0" x="82.30927675798694"/>
  </node>
  <node id="144736" label="HOXA2" cy:nodeId="112222">
    <graphics y="-131.9286856580893" z="0.0" x="-963.3885687009974"/>
  </node>
  <node id="144750" label="HEXIM1" cy:nodeId="112221">
    <graphics y="-876.4964423109213" z="0.0" x="-182.6542089597865"/>
  </node>
  <node id="144705" label="L3MBTL2" cy:nodeId="112224">
    <graphics y="-1175.8619818617026" z="0.0" x="97.258510766776"/>
  </node>
  <node id="144706" label="B3GNT3" cy:nodeId="112223">
    <graphics y="-890.6552557874838" z="0.0" x="-29.528436483590212"/>
  </node>
  <node id="144693" label="UGT1A6" cy:nodeId="112226">
    <graphics y="1447.4368462632974" z="0.0" x="791.7159234865026"/>
  </node>
  <node id="144696" label="ST6GALNAC2" cy:nodeId="112225">
    <graphics y="1464.38325739611" z="0.0" x="655.2996637208776"/>
  </node>
  <node id="144662" label="PALB2" cy:nodeId="112228">
    <graphics y="743.3076348375162" z="0.0" x="364.54832094744006"/>
  </node>
  <node id="144680" label="B4GALT4" cy:nodeId="112227">
    <graphics y="-437.1698737074057" z="0.0" x="608.7913019044713"/>
  </node>
  <node id="144632" label="ARSD" cy:nodeId="112230">
    <graphics y="-362.8632330824057" z="0.0" x="457.05686586931506"/>
  </node>
  <node id="144876" label="C1GALT1" cy:nodeId="109670">
    <graphics y="-560.3823981214682" z="0.0" x="398.88303774431506"/>
  </node>
  <node id="144654" label="RAG1" cy:nodeId="112229">
    <graphics y="27.807215220816943" z="0.0" x="333.4249383790807"/>
  </node>
  <node id="144604" label="TCFL5" cy:nodeId="112232">
    <graphics y="-471.31422185193696" z="0.0" x="488.47715395525256"/>
  </node>
  <node id="144615" label="SUMO1" cy:nodeId="112231">
    <graphics y="2083.61274958361" z="0.0" x="-714.0993230955287"/>
  </node>
  <node id="144694" label="NAGLU" cy:nodeId="109680">
    <graphics y="1564.08833552111" z="0.0" x="704.5978204591588"/>
  </node>
  <node id="144668" label="NR1H2" cy:nodeId="109685">
    <graphics y="-1407.412396900765" z="0.0" x="-449.22050839826306"/>
  </node>
  <node id="144602" label="TEAD2" cy:nodeId="109690">
    <graphics y="-754.4885077406088" z="0.0" x="-1012.9777410642787"/>
  </node>
  <node id="144836" label="PIGG" cy:nodeId="109689">
    <graphics y="99.51718378771147" z="0.0" x="72.51319521501819"/>
  </node>
  <node id="144594" label="TGIF1" cy:nodeId="109691">
    <graphics y="-682.3298773695151" z="0.0" x="-239.9560125486537"/>
  </node>
  <node id="144947" label="AEBP2" cy:nodeId="110787">
    <graphics y="221.6128716539224" z="0.0" x="773.5585748536901"/>
  </node>
  <node id="144883" label="BTAF1" cy:nodeId="110789">
    <graphics y="-986.3369574476401" z="0.0" x="102.82522219255725"/>
  </node>
  <node id="144794" label="ESRRA" cy:nodeId="110794">
    <graphics y="-1324.1056342054526" z="0.0" x="81.22562807634631"/>
  </node>
  <node id="144759" label="GTF3C1" cy:nodeId="110795">
    <graphics y="-28.508347981087354" z="0.0" x="1019.3210870607213"/>
  </node>
  <node id="144678" label="MNT" cy:nodeId="110801">
    <graphics y="-513.302014820687" z="0.0" x="-633.1756170408412"/>
  </node>
  <node id="144878" label="SGSH" cy:nodeId="110804">
    <graphics y="-955.0541205335776" z="0.0" x="-366.2619512693568"/>
  </node>
  <node id="144916" label="GALK2" cy:nodeId="110806">
    <graphics y="1032.906450755485" z="0.0" x="496.9867364747838"/>
  </node>
  <node id="144944" label="AFF4" cy:nodeId="105686">
    <graphics y="240.3987298082193" z="0.0" x="306.59153383806506"/>
  </node>
  <node id="144848" label="FUT7" cy:nodeId="105685">
    <graphics y="908.7229180406412" z="0.0" x="-777.0965154783412"/>
  </node>
  <node id="144942" label="STT3B" cy:nodeId="105688">
    <graphics y="163.48720026720366" z="0.0" x="363.63047426775256"/>
  </node>
  <node id="144667" label="NR1H3" cy:nodeId="110807">
    <graphics y="1281.81978083361" z="0.0" x="-785.0741766111537"/>
  </node>
  <node id="144943" label="MAN1A2" cy:nodeId="105687">
    <graphics y="180.8616967271646" z="0.0" x="256.8972284181432"/>
  </node>
  <node id="144940" label="FUT11" cy:nodeId="105690">
    <graphics y="105.97636652696929" z="0.0" x="261.5342218263463"/>
  </node>
  <node id="144657" label="PPARGC1A" cy:nodeId="110809">
    <graphics y="-178.58006810437837" z="0.0" x="1056.5314142091588"/>
  </node>
  <node id="144941" label="NEU3" cy:nodeId="105689">
    <graphics y="278.0526909898599" z="0.0" x="342.4212762697057"/>
  </node>
  <node id="144945" label="COG5" cy:nodeId="105692">
    <graphics y="72.22593928087554" z="0.0" x="307.8957940919713"/>
  </node>
  <node id="144939" label="ACER2" cy:nodeId="105691">
    <graphics y="163.3247094224771" z="0.0" x="123.04363649919787"/>
  </node>
  <node id="144930" label="MAN2A1" cy:nodeId="105694">
    <graphics y="217.28807306993804" z="0.0" x="522.8345758302526"/>
  </node>
  <node id="144931" label="AR" cy:nodeId="105693">
    <graphics y="187.94928217638335" z="0.0" x="404.6513788087682"/>
  </node>
  <node id="144911" label="SLC35F5" cy:nodeId="105696">
    <graphics y="141.75136042345366" z="0.0" x="558.6536676271276"/>
  </node>
  <node id="144917" label="SLC35A3" cy:nodeId="105695">
    <graphics y="346.92955256212554" z="0.0" x="457.52756899431506"/>
  </node>
  <node id="144937" label="GALNT10" cy:nodeId="105697">
    <graphics y="495.1088433336099" z="0.0" x="486.56357973650256"/>
  </node>
  <node id="144887" label="RTF1" cy:nodeId="105700">
    <graphics y="-26.89793919812837" z="0.0" x="-67.50770265027722"/>
  </node>
  <node id="144718" label="SLC35A5" cy:nodeId="105702">
    <graphics y="364.2661919664224" z="0.0" x="272.14341372087756"/>
  </node>
  <node id="144912" label="ATF2" cy:nodeId="105704">
    <graphics y="261.14049006212554" z="0.0" x="423.62815493181506"/>
  </node>
  <node id="144932" label="GALNT4" cy:nodeId="105703">
    <graphics y="-158.38287114392915" z="0.0" x="202.57700747087756"/>
  </node>
  <node id="144874" label="UGGT1" cy:nodeId="105705">
    <graphics y="427.34645319689116" z="0.0" x="294.70737856462756"/>
  </node>
  <node id="144838" label="B3GNT5" cy:nodeId="105707">
    <graphics y="-440.72462224256196" z="0.0" x="233.32920473650256"/>
  </node>
  <node id="144907" label="ATF7IP" cy:nodeId="105710">
    <graphics y="514.2245049547037" z="0.0" x="41.92013948992053"/>
  </node>
  <node id="144605" label="HAS2" cy:nodeId="105709">
    <graphics y="2083.61274958361" z="0.0" x="-913.6661489622279"/>
  </node>
  <node id="144905" label="ATRX" cy:nodeId="105712">
    <graphics y="-20.962050907723096" z="0.0" x="493.60007875994006"/>
  </node>
  <node id="144906" label="ALG10" cy:nodeId="105711">
    <graphics y="230.6754937242349" z="0.0" x="87.52904909685412"/>
  </node>
  <node id="144904" label="BACH1" cy:nodeId="105714">
    <graphics y="230.9800591539224" z="0.0" x="151.0073663575963"/>
  </node>
  <node id="144928" label="FKTN" cy:nodeId="105713">
    <graphics y="-23.627131931893018" z="0.0" x="195.26443117693225"/>
  </node>
  <node id="144902" label="MAN1A1" cy:nodeId="105716">
    <graphics y="430.10988093126616" z="0.0" x="169.76789492204944"/>
  </node>
  <node id="144903" label="CSGALNACT2" cy:nodeId="105715">
    <graphics y="589.8856377672037" z="0.0" x="-176.599155248849"/>
  </node>
  <node id="144784" label="CHST11" cy:nodeId="105718">
    <graphics y="1244.13960505236" z="0.0" x="-632.1156194822474"/>
  </node>
  <node id="144891" label="CHSY1" cy:nodeId="105717">
    <graphics y="-428.72215031873384" z="0.0" x="40.49015444353381"/>
  </node>
  <node id="144752" label="ST6GAL2" cy:nodeId="105720">
    <graphics y="-430.5779547620932" z="0.0" x="108.07477968767444"/>
  </node>
  <node id="144861" label="DPM3" cy:nodeId="105722">
    <graphics y="-1288.1119818617026" z="0.0" x="-399.59523374005994"/>
  </node>
  <node id="144857" label="MGAT1" cy:nodeId="105724">
    <graphics y="823.4895806382974" z="0.0" x="-740.0158270017787"/>
  </node>
  <node id="144923" label="ALG10B" cy:nodeId="105727">
    <graphics y="-219.52598332654634" z="0.0" x="169.82366579607287"/>
  </node>
  <node id="144899" label="PIGN" cy:nodeId="105730">
    <graphics y="299.25551081407866" z="0.0" x="146.5000116212682"/>
  </node>
  <node id="144804" label="PIGW" cy:nodeId="105729">
    <graphics y="-384.3418402601401" z="0.0" x="-421.66371518537244"/>
  </node>
  <node id="144913" label="SLC35E3" cy:nodeId="105732">
    <graphics y="298.3743157457193" z="0.0" x="524.7857477052526"/>
  </node>
  <node id="144946" label="FAM20B" cy:nodeId="105731">
    <graphics y="357.32106257189116" z="0.0" x="632.0001642091588"/>
  </node>
  <node id="144739" label="ALG12" cy:nodeId="105734">
    <graphics y="-1049.9775214124838" z="0.0" x="-221.135776342599"/>
  </node>
  <node id="144894" label="BRD1" cy:nodeId="105733">
    <graphics y="-498.7343268324057" z="0.0" x="-102.1914518491908"/>
  </node>
  <node id="144881" label="C17orf49" cy:nodeId="105736">
    <graphics y="-1747.9127631117026" z="0.0" x="-424.87517148420056"/>
  </node>
  <node id="144792" label="PMM1" cy:nodeId="105735">
    <graphics y="-1550.293744557015" z="0.0" x="177.5919305665807"/>
  </node>
  <node id="144920" label="ASH2L" cy:nodeId="107273">
    <graphics y="369.06141901720366" z="0.0" x="547.7707940919713"/>
  </node>
  <node id="144927" label="FUT10" cy:nodeId="107278">
    <graphics y="318.6466851304849" z="0.0" x="314.47736757829944"/>
  </node>
  <node id="144877" label="CBX3" cy:nodeId="105741">
    <graphics y="-833.4421210218588" z="0.0" x="214.3994256837682"/>
  </node>
  <node id="144888" label="BRD3" cy:nodeId="107277">
    <graphics y="-1.036557667366651" z="0.0" x="0.38149279192248287"/>
  </node>
  <node id="144870" label="RFNG" cy:nodeId="105744">
    <graphics y="-1374.1561713148276" z="0.0" x="-255.11684018537244"/>
  </node>
  <node id="144925" label="B4GALT5" cy:nodeId="107279">
    <graphics y="96.65004206407866" z="0.0" x="703.0898248536901"/>
  </node>
  <node id="144751" label="ST6GALNAC6" cy:nodeId="105746">
    <graphics y="-748.0470404554526" z="0.0" x="-406.1557195799037"/>
  </node>
  <node id="144873" label="CBX7" cy:nodeId="105745">
    <graphics y="-543.2537054945151" z="0.0" x="643.5493585450963"/>
  </node>
  <node id="144893" label="MAN2A2" cy:nodeId="105748">
    <graphics y="-250.0614752699057" z="0.0" x="95.9954492433385"/>
  </node>
  <node id="144821" label="ST3GAL3" cy:nodeId="105747">
    <graphics y="-1276.5304388929526" z="0.0" x="-72.83128529950818"/>
  </node>
  <node id="144890" label="IDUA" cy:nodeId="105749">
    <graphics y="-902.1754584242026" z="0.0" x="-336.09254819318494"/>
  </node>
  <node id="144871" label="CBX8" cy:nodeId="105752">
    <graphics y="-1459.763471119515" z="0.0" x="-178.14426022931775"/>
  </node>
  <node id="144601" label="FUT2" cy:nodeId="107287">
    <graphics y="-837.4024481702963" z="0.0" x="-1200.8427312986537"/>
  </node>
  <node id="144791" label="HYAL1" cy:nodeId="105751">
    <graphics y="-1454.0612006117026" z="0.0" x="261.09763735369006"/>
  </node>
  <node id="144796" label="ASAH1" cy:nodeId="107290">
    <graphics y="1341.2574029039224" z="0.0" x="85.9012109620885"/>
  </node>
  <node id="144880" label="B3GAT3" cy:nodeId="105754">
    <graphics y="-1422.37309026014" z="0.0" x="-386.67445737287244"/>
  </node>
  <node id="144766" label="GALK1" cy:nodeId="105753">
    <graphics y="-2087.052045338265" z="0.0" x="-148.98725491925916"/>
  </node>
  <node id="144798" label="ERCC3" cy:nodeId="107292">
    <graphics y="-1016.4990057874838" z="0.0" x="3.551635919363889"/>
  </node>
  <node id="144865" label="CDK8" cy:nodeId="105756">
    <graphics y="153.9860863756021" z="0.0" x="451.7361261232213"/>
  </node>
  <node id="144868" label="CCDC101" cy:nodeId="105755">
    <graphics y="-1655.83012151014" z="0.0" x="-495.20387631818494"/>
  </node>
  <node id="144901" label="PAPSS1" cy:nodeId="107291">
    <graphics y="39.031290538199755" z="0.0" x="72.87934511736194"/>
  </node>
  <node id="144862" label="DPM2" cy:nodeId="105758">
    <graphics y="-1361.7772650648276" z="0.0" x="-397.17091733380994"/>
  </node>
  <node id="144863" label="CDK9" cy:nodeId="105757">
    <graphics y="-1233.4383978773276" z="0.0" x="-430.3121221677943"/>
  </node>
  <node id="144692" label="GCNT2" cy:nodeId="107296">
    <graphics y="1642.4234185289224" z="0.0" x="583.7629815919713"/>
  </node>
  <node id="144779" label="FOSL2" cy:nodeId="107295">
    <graphics y="-97.51569508802095" z="0.0" x="428.36961000994006"/>
  </node>
  <node id="144869" label="PIGQ" cy:nodeId="105759">
    <graphics y="-1208.5245795179526" z="0.0" x="-329.41542416974744"/>
  </node>
  <node id="144889" label="MOGS" cy:nodeId="105762">
    <graphics y="-907.3134589124838" z="0.0" x="-449.1898077146693"/>
  </node>
  <node id="144708" label="GNE" cy:nodeId="107297">
    <graphics y="-132.0463080335776" z="0.0" x="276.48627871111194"/>
  </node>
  <node id="144858" label="CEBPA" cy:nodeId="105764">
    <graphics y="890.4940362047037" z="0.0" x="-689.9777410642787"/>
  </node>
  <node id="144735" label="CHST12" cy:nodeId="105763">
    <graphics y="-154.8090338636557" z="0.0" x="-753.5807684080287"/>
  </node>
  <node id="144757" label="GTF3C2" cy:nodeId="107302">
    <graphics y="61.8206811021646" z="0.0" x="-360.6462286131068"/>
  </node>
  <node id="144853" label="MFNG" cy:nodeId="105766">
    <graphics y="477.23463679064116" z="0.0" x="-715.9570501463099"/>
  </node>
  <node id="144856" label="NAGK" cy:nodeId="105765">
    <graphics y="809.7539239000162" z="0.0" x="-639.1123846189662"/>
  </node>
  <node id="144897" label="A4GALT" cy:nodeId="105768">
    <graphics y="2083.61274958361" z="0.0" x="-115.39884549543103"/>
  </node>
  <node id="144844" label="CEBPB" cy:nodeId="105767">
    <graphics y="-1679.313275807015" z="0.0" x="-324.32106381818494"/>
  </node>
  <node id="144827" label="GALNT2" cy:nodeId="107306">
    <graphics y="990.6153130601724" z="0.0" x="154.3209649904088"/>
  </node>
  <node id="144837" label="CHD2" cy:nodeId="105770">
    <graphics y="-114.14702748548189" z="0.0" x="41.69012087419787"/>
  </node>
  <node id="144697" label="GNPDA1" cy:nodeId="107305">
    <graphics y="1691.8491997789224" z="0.0" x="784.9080011232213"/>
  </node>
  <node id="144843" label="CHD1" cy:nodeId="105769">
    <graphics y="-278.105741016976" z="0.0" x="35.151004968436155"/>
  </node>
  <node id="144734" label="HOXA6" cy:nodeId="107308">
    <graphics y="-49.07274078618684" z="0.0" x="660.9897271974401"/>
  </node>
  <node id="144900" label="NDST2" cy:nodeId="105772">
    <graphics y="-100.12150334607759" z="0.0" x="-25.65791684552869"/>
  </node>
  <node id="144842" label="OGT" cy:nodeId="105771">
    <graphics y="-337.6981940199057" z="0.0" x="-30.062135519234744"/>
  </node>
  <node id="144699" label="GBA" cy:nodeId="107309">
    <graphics y="1357.52974177111" z="0.0" x="692.3382379396276"/>
  </node>
  <node id="144835" label="CHD4" cy:nodeId="105773">
    <graphics y="440.1234612535318" z="0.0" x="421.00730532244006"/>
  </node>
  <node id="144720" label="KAT2B" cy:nodeId="107312">
    <graphics y="465.83339167345366" z="0.0" x="235.5949823243932"/>
  </node>
  <node id="144828" label="LAMP3" cy:nodeId="105776">
    <graphics y="1074.6909966539224" z="0.0" x="-366.12590390607556"/>
  </node>
  <node id="144829" label="CIITA" cy:nodeId="105775">
    <graphics y="1145.52241755236" z="0.0" x="-206.39548093244275"/>
  </node>
  <node id="144854" label="GAL3ST4" cy:nodeId="105778">
    <graphics y="1065.5554986070474" z="0.0" x="-471.0992010252162"/>
  </node>
  <node id="144715" label="KDM2B" cy:nodeId="107313">
    <graphics y="-256.3620276380698" z="0.0" x="-42.89342290326795"/>
  </node>
  <node id="144908" label="MAN2B1" cy:nodeId="105777">
    <graphics y="852.8294854234537" z="0.0" x="-882.0538519041224"/>
  </node>
  <node id="144825" label="CPSF3L" cy:nodeId="105780">
    <graphics y="-1188.504193775765" z="0.0" x="-167.5730550901576"/>
  </node>
  <node id="144712" label="KDM6B" cy:nodeId="107315">
    <graphics y="-459.5048041273276" z="0.0" x="-285.83652097150525"/>
  </node>
  <node id="144778" label="DSE" cy:nodeId="105779">
    <graphics y="67.26046992052397" z="0.0" x="430.10105532244006"/>
  </node>
  <node id="144685" label="B4GALT7" cy:nodeId="105782">
    <graphics y="-1428.0424017835776" z="0.0" x="-570.9643133299037"/>
  </node>
  <node id="144707" label="KLF5" cy:nodeId="107318">
    <graphics y="-788.4006781507651" z="0.0" x="68.79196566179553"/>
  </node>
  <node id="144709" label="KLF4" cy:nodeId="107317">
    <graphics y="-307.6895270277182" z="0.0" x="185.1932794435338"/>
  </node>
  <node id="144860" label="B3GALT6" cy:nodeId="105781">
    <graphics y="-1114.4879584242026" z="0.0" x="-459.89992124005994"/>
  </node>
  <node id="144704" label="LDB1" cy:nodeId="107320">
    <graphics y="545.3902154039224" z="0.0" x="757.6410333497838"/>
  </node>
  <node id="144824" label="POMGNT1" cy:nodeId="105783">
    <graphics y="-1000.9584784437338" z="0.0" x="-127.02247220441541"/>
  </node>
  <node id="144688" label="MBD2" cy:nodeId="107322">
    <graphics y="-852.9271674085776" z="0.0" x="389.5286981447057"/>
  </node>
  <node id="144819" label="CREB3L4" cy:nodeId="105788">
    <graphics y="-838.2421088148276" z="0.0" x="-714.6253851072474"/>
  </node>
  <node id="144686" label="MBD3" cy:nodeId="107323">
    <graphics y="-1274.71342229139" z="0.0" x="-323.0835760252162"/>
  </node>
  <node id="144818" label="CREBBP" cy:nodeId="105790">
    <graphics y="302.3582024644693" z="0.0" x="205.20872133806506"/>
  </node>
  <node id="144762" label="POFUT1" cy:nodeId="105792">
    <graphics y="268.54689265001616" z="0.0" x="634.9523736818151"/>
  </node>
  <node id="144921" label="PAPSS2" cy:nodeId="107328">
    <graphics y="-386.4286322523276" z="0.0" x="721.1947442872838"/>
  </node>
  <node id="144770" label="COG7" cy:nodeId="105791">
    <graphics y="-58.77859925519624" z="0.0" x="757.2478448732213"/>
  </node>
  <node id="144773" label="POFUT2" cy:nodeId="107327">
    <graphics y="-717.8198065687338" z="0.0" x="-316.2960088865443"/>
  </node>
  <node id="144670" label="NFYB" cy:nodeId="107330">
    <graphics y="-545.144055836312" z="0.0" x="7.532055078299436"/>
  </node>
  <node id="144815" label="CTBP1" cy:nodeId="105793">
    <graphics y="-1505.51469182264" z="0.0" x="-463.74135190412244"/>
  </node>
  <node id="144663" label="NRF1" cy:nodeId="107333">
    <graphics y="-919.3939642835776" z="0.0" x="-272.1770818845912"/>
  </node>
  <node id="144737" label="KHK" cy:nodeId="105800">
    <graphics y="695.4944024156412" z="0.0" x="846.2288629396276"/>
  </node>
  <node id="144758" label="SLC35A2" cy:nodeId="107335">
    <graphics y="165.74562311876616" z="0.0" x="932.2562677247838"/>
  </node>
  <node id="144884" label="DPM1" cy:nodeId="105799">
    <graphics y="2092.910326487907" z="0.0" x="-414.96567136213025"/>
  </node>
  <node id="144643" label="RYBP" cy:nodeId="107338">
    <graphics y="-287.6282172132651" z="0.0" x="394.66315859392444"/>
  </node>
  <node id="144805" label="E2F6" cy:nodeId="105801">
    <graphics y="-433.62757634412446" z="0.0" x="-516.4350774900599"/>
  </node>
  <node id="144635" label="SMAD3" cy:nodeId="107342">
    <graphics y="-165.8830313612143" z="0.0" x="-56.003143490998355"/>
  </node>
  <node id="144631" label="SMARCA4" cy:nodeId="107343">
    <graphics y="505.73695612657866" z="0.0" x="-88.97129041120252"/>
  </node>
  <node id="144626" label="SP2" cy:nodeId="107346">
    <graphics y="368.7507805894693" z="0.0" x="193.90554445818225"/>
  </node>
  <node id="144934" label="AHR" cy:nodeId="106836">
    <graphics y="-326.8885931898276" z="0.0" x="579.9073907716588"/>
  </node>
  <node id="144620" label="STAT3" cy:nodeId="107347">
    <graphics y="110.80600214708647" z="0.0" x="329.3196222169713"/>
  </node>
  <node id="144926" label="PIGK" cy:nodeId="106835">
    <graphics y="119.94072199571929" z="0.0" x="379.82163637712756"/>
  </node>
  <node id="144611" label="SVIL" cy:nodeId="107349">
    <graphics y="-119.66010808240571" z="0.0" x="-185.2357977049037"/>
  </node>
  <node id="144740" label="B4GALNT2" cy:nodeId="107352">
    <graphics y="-641.3412299085776" z="0.0" x="71.10515230730334"/>
  </node>
  <node id="144780" label="TPST2" cy:nodeId="106840">
    <graphics y="1027.0345025132974" z="0.0" x="-612.3512151853724"/>
  </node>
  <node id="144625" label="UGT8" cy:nodeId="106842">
    <graphics y="659.6880059312662" z="0.0" x="-10.41170865461072"/>
  </node>
  <node id="144598" label="TERF2" cy:nodeId="107353">
    <graphics y="41.750704295523974" z="0.0" x="569.2003595216588"/>
  </node>
  <node id="144746" label="UAP1" cy:nodeId="105820">
    <graphics y="879.0254082750162" z="0.0" x="875.8870660646276"/>
  </node>
  <node id="144589" label="VDR" cy:nodeId="107356">
    <graphics y="988.7035698961099" z="0.0" x="742.8561212404088"/>
  </node>
  <node id="144936" label="SLC35E1" cy:nodeId="106844">
    <graphics y="201.38223505724272" z="0.0" x="203.67979067400256"/>
  </node>
  <node id="144753" label="LFNG" cy:nodeId="106846">
    <graphics y="-719.0601630140463" z="0.0" x="-475.9785955564662"/>
  </node>
  <node id="144801" label="ELF1" cy:nodeId="105822">
    <graphics y="335.18101740587554" z="0.0" x="33.92266481951037"/>
  </node>
  <node id="144802" label="EHMT2" cy:nodeId="105821">
    <graphics y="-1051.0265936781088" z="0.0" x="-614.8773382322474"/>
  </node>
  <node id="144867" label="CDK12" cy:nodeId="106848">
    <graphics y="299.61107111681304" z="0.0" x="-42.28345471784314"/>
  </node>
  <node id="144919" label="COG6" cy:nodeId="105824">
    <graphics y="345.08287287462554" z="0.0" x="370.25422304704944"/>
  </node>
  <node id="144875" label="CBX6" cy:nodeId="106847">
    <graphics y="638.5583062242349" z="0.0" x="242.10825747087756"/>
  </node>
  <node id="144892" label="COG3" cy:nodeId="105823">
    <graphics y="-183.51499699842134" z="0.0" x="15.939006982596311"/>
  </node>
  <node id="144810" label="DCP1A" cy:nodeId="106850">
    <graphics y="512.2865166734537" z="0.0" x="139.5137140138463"/>
  </node>
  <node id="144826" label="CLOCK" cy:nodeId="106849">
    <graphics y="403.1978325914224" z="0.0" x="-14.999912084786502"/>
  </node>
  <node id="144822" label="GALT" cy:nodeId="106851">
    <graphics y="-1441.991498463265" z="0.0" x="-10.85748273297986"/>
  </node>
  <node id="144786" label="MAN1C1" cy:nodeId="106853">
    <graphics y="1098.3203911851724" z="0.0" x="-560.5073125974818"/>
  </node>
  <node id="144799" label="EP400" cy:nodeId="105829">
    <graphics y="-54.86353587400117" z="0.0" x="21.973354516776"/>
  </node>
  <node id="144785" label="FUCA1" cy:nodeId="106856">
    <graphics y="1157.69136286486" z="0.0" x="-445.37529355451306"/>
  </node>
  <node id="144745" label="ST6GAL1" cy:nodeId="106855">
    <graphics y="839.5898003648599" z="0.0" x="688.6901666505651"/>
  </node>
  <node id="144847" label="ST8SIA4" cy:nodeId="105834">
    <graphics y="804.8773980211099" z="0.0" x="-552.3784368650599"/>
  </node>
  <node id="144674" label="CHSY3" cy:nodeId="105833">
    <graphics y="2187.0643487047037" z="0.0" x="-1201.4431951658412"/>
  </node>
  <node id="144872" label="MGAT4A" cy:nodeId="106860">
    <graphics y="-270.15537785779634" z="0.0" x="321.90684145525256"/>
  </node>
  <node id="144840" label="GALNT7" cy:nodeId="106859">
    <graphics y="-72.42612981092134" z="0.0" x="249.74946230486194"/>
  </node>
  <node id="144646" label="SULT1C4" cy:nodeId="105837">
    <graphics y="718.3706231187662" z="0.0" x="530.0852472169713"/>
  </node>
  <node id="144895" label="CHST15" cy:nodeId="106861">
    <graphics y="314.4419732164224" z="0.0" x="-173.36819058820447"/>
  </node>
  <node id="144775" label="GPI" cy:nodeId="106864">
    <graphics y="2092.910326487907" z="0.0" x="-215.39884549543103"/>
  </node>
  <node id="144783" label="ST8SIA1" cy:nodeId="105840">
    <graphics y="1283.321978099235" z="0.0" x="-526.6948431150599"/>
  </node>
  <node id="144776" label="GAPDH" cy:nodeId="106863">
    <graphics y="2083.61274958361" z="0.0" x="-314.96567136213025"/>
  </node>
  <node id="144765" label="GRHL1" cy:nodeId="106866">
    <graphics y="-1044.6368231702963" z="0.0" x="-905.7900579588099"/>
  </node>
  <node id="144790" label="ETV1" cy:nodeId="105842">
    <graphics y="-505.1648688245932" z="0.0" x="295.34907167986194"/>
  </node>
  <node id="144767" label="GPS2" cy:nodeId="106865">
    <graphics y="-2240.1713080335776" z="0.0" x="-131.50631314679822"/>
  </node>
  <node id="144760" label="MGAT2" cy:nodeId="106868">
    <graphics y="490.6319146226724" z="0.0" x="324.69733828142444"/>
  </node>
  <node id="144833" label="EXTL2" cy:nodeId="105844">
    <graphics y="-269.5846228529135" z="0.0" x="-127.7616537229701"/>
  </node>
  <node id="144640" label="ARSB" cy:nodeId="105843">
    <graphics y="855.0321221422037" z="0.0" x="449.7041437013463"/>
  </node>
  <node id="144749" label="HIF1A" cy:nodeId="106867">
    <graphics y="581.9614434312662" z="0.0" x="500.8223077638463"/>
  </node>
  <node id="144789" label="EZH1" cy:nodeId="105846">
    <graphics y="-749.9679999281088" z="0.0" x="-188.0756414549037"/>
  </node>
  <node id="144747" label="GALC" cy:nodeId="106869">
    <graphics y="732.1849541734537" z="0.0" x="703.0849420411901"/>
  </node>
  <node id="144727" label="IRF3" cy:nodeId="106872">
    <graphics y="-1170.9911322523276" z="0.0" x="-396.8710516111537"/>
  </node>
  <node id="144787" label="FLI1" cy:nodeId="105848">
    <graphics y="964.8006768297037" z="0.0" x="-504.71538144513806"/>
  </node>
  <node id="144716" label="KDM1B" cy:nodeId="106873">
    <graphics y="754.3364434312662" z="0.0" x="51.38418978288928"/>
  </node>
  <node id="144701" label="MAF" cy:nodeId="106876">
    <graphics y="1373.440630442985" z="0.0" x="563.3151056154088"/>
  </node>
  <node id="144761" label="GLCE" cy:nodeId="105851">
    <graphics y="258.4235405992349" z="0.0" x="34.59073275163928"/>
  </node>
  <node id="144748" label="GNPNAT1" cy:nodeId="105855">
    <graphics y="873.4149956773599" z="0.0" x="584.2962457521276"/>
  </node>
  <node id="144717" label="GFPT1" cy:nodeId="106882">
    <graphics y="799.4279961656412" z="0.0" x="167.63450258806506"/>
  </node>
  <node id="144658" label="PPARA" cy:nodeId="106881">
    <graphics y="326.8455376695474" z="0.0" x="743.4514581544713"/>
  </node>
  <node id="144652" label="RARA" cy:nodeId="106884">
    <graphics y="-809.2608466077963" z="0.0" x="-266.46892148420056"/>
  </node>
  <node id="144849" label="NPL" cy:nodeId="105860">
    <graphics y="1090.254107005485" z="0.0" x="-919.6989324705287"/>
  </node>
  <node id="144851" label="HK3" cy:nodeId="105859">
    <graphics y="945.4556450914224" z="0.0" x="-607.4498479978724"/>
  </node>
  <node id="144639" label="SIRT6" cy:nodeId="106885">
    <graphics y="-1335.7594427992026" z="0.0" x="-500.8548162595912"/>
  </node>
  <node id="144841" label="ALG13" cy:nodeId="105864">
    <graphics y="-346.31092595349946" z="0.0" x="-231.6807745115443"/>
  </node>
  <node id="144774" label="GATAD1" cy:nodeId="105863">
    <graphics y="-441.17747258435884" z="0.0" x="-174.2841146604701"/>
  </node>
  <node id="144593" label="THAP11" cy:nodeId="106890">
    <graphics y="-714.6290717054526" z="0.0" x="677.6371270997838"/>
  </node>
  <node id="144771" label="GLYR1" cy:nodeId="105866">
    <graphics y="38.82526636827788" z="0.0" x="863.6550104005651"/>
  </node>
  <node id="144823" label="COG4" cy:nodeId="106892">
    <graphics y="-1053.3898138929526" z="0.0" x="331.3887140138463"/>
  </node>
  <node id="144769" label="ALG1" cy:nodeId="105867">
    <graphics y="42.590189463981005" z="0.0" x="1162.8658868654088"/>
  </node>
  <node id="144864" label="COG8" cy:nodeId="106891">
    <graphics y="-178.86097478162446" z="0.0" x="764.5008355958776"/>
  </node>
  <node id="144585" label="ZBTB10" cy:nodeId="106894">
    <graphics y="452.16990900743804" z="0.0" x="-232.6778906004115"/>
  </node>
  <node id="144719" label="CTBS" cy:nodeId="105869">
    <graphics y="832.5003838609537" z="0.0" x="273.2425653322057"/>
  </node>
  <node id="144816" label="STT3A" cy:nodeId="106893">
    <graphics y="448.3770012925943" z="0.0" x="549.8279229982213"/>
  </node>
  <node id="144763" label="GTF2I" cy:nodeId="105871">
    <graphics y="198.35959101427397" z="0.0" x="320.7611200197057"/>
  </node>
  <node id="144929" label="PIGO" cy:nodeId="105874">
    <graphics y="234.24452448595366" z="0.0" x="258.19392031267444"/>
  </node>
  <node id="144755" label="HCFC1" cy:nodeId="105873">
    <graphics y="111.17648554552397" z="0.0" x="149.8393976075963"/>
  </node>
  <node id="144638" label="TSTA3" cy:nodeId="105880">
    <graphics y="-1555.3666205335776" z="0.0" x="-679.4530218259974"/>
  </node>
  <node id="144731" label="HSF1" cy:nodeId="105879">
    <graphics y="-1435.4413275648276" z="0.0" x="-307.49093991681775"/>
  </node>
  <node id="144730" label="IKZF1" cy:nodeId="105882">
    <graphics y="886.8762993882974" z="0.0" x="-510.44728452130994"/>
  </node>
  <node id="144725" label="LIPA" cy:nodeId="105884">
    <graphics y="1279.11323786486" z="0.0" x="-364.49882871076306"/>
  </node>
  <node id="144852" label="GM2A" cy:nodeId="105883">
    <graphics y="1072.676470286735" z="0.0" x="-239.89752561017713"/>
  </node>
  <node id="144728" label="INTS3" cy:nodeId="105886">
    <graphics y="-841.3577704359213" z="0.0" x="-588.8863104002162"/>
  </node>
  <node id="144729" label="INO80" cy:nodeId="105885">
    <graphics y="177.1669945787271" z="0.0" x="37.494327722342405"/>
  </node>
  <node id="144726" label="IRF8" cy:nodeId="105890">
    <graphics y="989.8599419664224" z="0.0" x="-395.3288458006068"/>
  </node>
  <node id="144724" label="JMJD1C" cy:nodeId="105892">
    <graphics y="-12.048467152229932" z="0.0" x="255.75803774431506"/>
  </node>
  <node id="144722" label="JMJD6" cy:nodeId="105894">
    <graphics y="-1831.99613713514" z="0.0" x="-180.2038458006068"/>
  </node>
  <node id="144655" label="MGAT5" cy:nodeId="105893">
    <graphics y="194.50985956896147" z="0.0" x="700.2380182130651"/>
  </node>
  <node id="144845" label="GBGT1" cy:nodeId="105897">
    <graphics y="696.3532891343912" z="0.0" x="-886.2443426267787"/>
  </node>
  <node id="144721" label="JUND" cy:nodeId="105899">
    <graphics y="-1507.55326604139" z="0.0" x="-349.40321713849744"/>
  </node>
  <node id="144714" label="KDM3A" cy:nodeId="105903">
    <graphics y="-74.51802777539888" z="0.0" x="-113.86606198713025"/>
  </node>
  <node id="144645" label="HS2ST1" cy:nodeId="105906">
    <graphics y="627.4770073961099" z="0.0" x="349.6014520509557"/>
  </node>
  <node id="144795" label="GNS" cy:nodeId="105905">
    <graphics y="928.5197930406412" z="0.0" x="-29.715390981881228"/>
  </node>
  <node id="144886" label="B3GALNT2" cy:nodeId="105908">
    <graphics y="-192.29861211072603" z="0.0" x="-121.56089383527478"/>
  </node>
  <node id="144813" label="HS3ST1" cy:nodeId="105910">
    <graphics y="-549.2594427992026" z="0.0" x="215.9165460450963"/>
  </node>
  <node id="144700" label="RENBP" cy:nodeId="105912">
    <graphics y="1580.764849192985" z="0.0" x="447.1392938478307"/>
  </node>
  <node id="144703" label="LYL1" cy:nodeId="105911">
    <graphics y="734.3720879625162" z="0.0" x="-729.0403631345912"/>
  </node>
  <node id="144793" label="CHST13" cy:nodeId="105913">
    <graphics y="-806.5442328382651" z="0.0" x="563.3431817872838"/>
  </node>
  <node id="144690" label="MAZ" cy:nodeId="105916">
    <graphics y="-1354.8195013929526" z="0.0" x="-314.6586492674037"/>
  </node>
  <node id="144689" label="B4GALT2" cy:nodeId="105917">
    <graphics y="-1295.460736744515" z="0.0" x="-216.0381658689662"/>
  </node>
  <node id="144723" label="IDS" cy:nodeId="105922">
    <graphics y="-184.13250493299165" z="0.0" x="406.26450747087756"/>
  </node>
  <node id="144684" label="MECP2" cy:nodeId="105921">
    <graphics y="-73.65647839795747" z="0.0" x="78.59222048357287"/>
  </node>
  <node id="144683" label="MED1" cy:nodeId="105924">
    <graphics y="409.8534417222818" z="0.0" x="89.46033876970569"/>
  </node>
  <node id="144743" label="NDST1" cy:nodeId="105923">
    <graphics y="563.6710991929849" z="0.0" x="249.08601015642444"/>
  </node>
  <node id="144741" label="GALNT11" cy:nodeId="107974">
    <graphics y="-372.3003363538901" z="0.0" x="314.71162050798694"/>
  </node>
  <node id="144682" label="MEF2A" cy:nodeId="105925">
    <graphics y="-95.76834630262056" z="0.0" x="190.1529657228307"/>
  </node>
  <node id="144812" label="FUT8" cy:nodeId="107976">
    <graphics y="-654.5259833265463" z="0.0" x="352.5531427247838"/>
  </node>
  <node id="144681" label="MITF" cy:nodeId="105929">
    <graphics y="-188.3188910413901" z="0.0" x="325.98142641619006"/>
  </node>
  <node id="144885" label="BRD7" cy:nodeId="107977">
    <graphics y="2083.61274958361" z="0.0" x="-514.5324972288295"/>
  </node>
  <node id="144695" label="CTSA" cy:nodeId="107984">
    <graphics y="1520.901079661735" z="0.0" x="554.8452569825963"/>
  </node>
  <node id="144850" label="B3GNT8" cy:nodeId="107983">
    <graphics y="977.9481988023599" z="0.0" x="-706.9818304197474"/>
  </node>
  <node id="144859" label="SLC35C2" cy:nodeId="107986">
    <graphics y="-1101.5907416273276" z="0.0" x="-397.3816717283412"/>
  </node>
  <node id="144675" label="MYH11" cy:nodeId="105937">
    <graphics y="2135.380083567985" z="0.0" x="-1107.6301992551967"/>
  </node>
  <node id="144807" label="E2F4" cy:nodeId="107987">
    <graphics y="-1379.99418401014" z="0.0" x="-895.9518011228724"/>
  </node>
  <node id="144811" label="CHST9" cy:nodeId="105939">
    <graphics y="-580.2522406507651" z="0.0" x="138.1119806154088"/>
  </node>
  <node id="144672" label="MZF1" cy:nodeId="105942">
    <graphics y="-900.2093939710776" z="0.0" x="-797.0962103025599"/>
  </node>
  <node id="144634" label="HAS3" cy:nodeId="105941">
    <graphics y="-155.96119450818696" z="0.0" x="-384.01759702130994"/>
  </node>
  <node id="144669" label="NFYC" cy:nodeId="105946">
    <graphics y="-1191.3805365492026" z="0.0" x="-46.10937005445203"/>
  </node>
  <node id="144742" label="HNF1B" cy:nodeId="107994">
    <graphics y="-701.4119086195151" z="0.0" x="-65.09079343244275"/>
  </node>
  <node id="144738" label="HNF4A" cy:nodeId="107995">
    <graphics y="-59.00950860273042" z="0.0" x="854.8376886232213"/>
  </node>
  <node id="144831" label="SLC35D1" cy:nodeId="105950">
    <graphics y="73.09540796984038" z="0.0" x="-0.37310010358532963"/>
  </node>
  <node id="144666" label="NR2C2" cy:nodeId="105949">
    <graphics y="-168.87027501355806" z="0.0" x="115.68388002947131"/>
  </node>
  <node id="144713" label="KDM4C" cy:nodeId="107997">
    <graphics y="58.93560267198882" z="0.0" x="194.6477929933385"/>
  </node>
  <node id="144764" label="GALNT3" cy:nodeId="108000">
    <graphics y="-1124.49223088514" z="0.0" x="-1101.6563299314662"/>
  </node>
  <node id="144702" label="NANS" cy:nodeId="108002">
    <graphics y="727.5851006578287" z="0.0" x="-1007.5193670408412"/>
  </node>
  <node id="144866" label="PIGM" cy:nodeId="105954">
    <graphics y="157.18673945177397" z="0.0" x="-100.61418897077283"/>
  </node>
  <node id="144608" label="SLC35A1" cy:nodeId="108001">
    <graphics y="-249.1331000257651" z="0.0" x="-617.9450262205287"/>
  </node>
  <node id="144660" label="PHF20" cy:nodeId="105956">
    <graphics y="206.59108210314116" z="0.0" x="594.3847467286901"/>
  </node>
  <node id="144777" label="B3GNT7" cy:nodeId="108004">
    <graphics y="-285.05804204236665" z="0.0" x="825.2878229005651"/>
  </node>
  <node id="144661" label="PCGF1" cy:nodeId="105955">
    <graphics y="-1626.7142767835776" z="0.0" x="-135.16694241925916"/>
  </node>
  <node id="144691" label="MAFK" cy:nodeId="108006">
    <graphics y="-831.9642157484213" z="0.0" x="-369.89442807599744"/>
  </node>
  <node id="144914" label="SLC17A5" cy:nodeId="108005">
    <graphics y="489.19655085314116" z="0.0" x="914.7004205568151"/>
  </node>
  <node id="144673" label="CHST1" cy:nodeId="108010">
    <graphics y="2083.61274958361" z="0.0" x="-1013.6661489622279"/>
  </node>
  <node id="144677" label="MYC" cy:nodeId="108009">
    <graphics y="1868.0506157945474" z="0.0" x="908.1658746583776"/>
  </node>
  <node id="144839" label="UGGT2" cy:nodeId="105966">
    <graphics y="-68.04778241407075" z="0.0" x="135.9410821779088"/>
  </node>
  <node id="144651" label="RB1" cy:nodeId="105965">
    <graphics y="53.77940607775054" z="0.0" x="248.35154360369006"/>
  </node>
  <node id="144803" label="CHST10" cy:nodeId="108013">
    <graphics y="-687.0244574476401" z="0.0" x="-683.7582586424037"/>
  </node>
</graph>
