# Supplementary material for: A systems-based framework to computationally describe putative transcription factors and signaling pathways regulating glycan biosynthesis
Source: publisher site journal article supplement (doi:10.3762/bjoc.17.119), 2021-07-22
Supplement: Additional file 2 [file 1860-5397-17-119-S2.cys › CytoscapeSession-2021_03_21-12_01/views/113200-130434-LAML.xgmml]

<?xml version="1.0" encoding="UTF-8" standalone="yes"?>
<graph id="130434" label="LAML" cy:view="1" cy:networkId="113200" cy:visualStyle="default" cy:rendererId="org.cytoscape.ding" cy:documentVersion="3.0" xmlns:dc="http://purl.org/dc/elements/1.1/" xmlns:xlink="http://www.w3.org/1999/xlink" xmlns:rdf="http://www.w3.org/1999/02/22-rdf-syntax-ns#" xmlns:cy="http://www.cytoscape.org" xmlns="http://www.cs.rpi.edu/XGMML">
  <graphics>
    <att name="NETWORK_NODE_SELECTION" value="true" type="string" cy:type="String"/>
    <att name="NETWORK_CENTER_X_LOCATION" value="-214.08856201171875" type="string" cy:type="String"/>
    <att name="NETWORK_HEIGHT" value="510.0" type="string" cy:type="String"/>
    <att name="NETWORK_TITLE" value="LAML" type="string" cy:type="String"/>
    <att name="NETWORK_EDGE_SELECTION" value="true" type="string" cy:type="String"/>
    <att name="NETWORK_CENTER_Y_LOCATION" value="55.5770263671875" type="string" cy:type="String"/>
    <att name="NETWORK_WIDTH" value="1312.0" type="string" cy:type="String"/>
    <att name="NETWORK_DEPTH" value="0.0" type="string" cy:type="String"/>
    <att name="NETWORK_SCALE_FACTOR" value="0.14454775130182104" type="string" cy:type="String"/>
    <att name="NETWORK_ANNOTATION_SELECTION" value="false" type="string" cy:type="String"/>
    <att name="NETWORK_CENTER_Z_LOCATION" value="0.0" type="string" cy:type="String"/>
  </graphics>
  <node id="130867" label="ATF4" cy:nodeId="108550">
    <graphics y="-556.8088507661976" z="0.0" x="-353.1506423256626"/>
  </node>
  <node id="130887" label="ALG9" cy:nodeId="108554">
    <graphics y="604.1742424955212" z="0.0" x="-284.82924645163916"/>
  </node>
  <node id="130845" label="BACH2" cy:nodeId="108553">
    <graphics y="-1398.3931403169788" z="0.0" x="297.6043625571499"/>
  </node>
  <node id="130509" label="PMM2" cy:nodeId="108556">
    <graphics y="242.93350458048212" z="0.0" x="259.64922339699365"/>
  </node>
  <node id="130729" label="DDOST" cy:nodeId="108555">
    <graphics y="-780.8948493013538" z="0.0" x="-425.919532706522"/>
  </node>
  <node id="130884" label="PIGC" cy:nodeId="108558">
    <graphics y="359.1724419584118" z="0.0" x="-722.9655837319126"/>
  </node>
  <node id="130778" label="PIGF" cy:nodeId="108557">
    <graphics y="253.82455682657587" z="0.0" x="-1282.8701247475376"/>
  </node>
  <node id="130685" label="GAA" cy:nodeId="108560">
    <graphics y="-417.36109685994757" z="0.0" x="857.2590866782436"/>
  </node>
  <node id="130838" label="GALE" cy:nodeId="108559">
    <graphics y="-612.7954840669788" z="0.0" x="-75.81366722800635"/>
  </node>
  <node id="130754" label="CEBPZ" cy:nodeId="108564">
    <graphics y="962.2711663236462" z="0.0" x="-985.3585891030064"/>
  </node>
  <node id="130756" label="CEBPD" cy:nodeId="108563">
    <graphics y="-343.53541326619757" z="0.0" x="924.7645188071499"/>
  </node>
  <node id="130740" label="CSNK2A1" cy:nodeId="108568">
    <graphics y="556.0608696927868" z="0.0" x="-801.5593337319126"/>
  </node>
  <node id="130904" label="NAGA" cy:nodeId="108567">
    <graphics y="-573.1553473482288" z="0.0" x="974.7681809165249"/>
  </node>
  <node id="130734" label="DOT1L" cy:nodeId="108570">
    <graphics y="-911.8441901216663" z="0.0" x="-406.43915550925635"/>
  </node>
  <node id="130738" label="DAXX" cy:nodeId="108569">
    <graphics y="-236.4960150728382" z="0.0" x="43.212127754903804"/>
  </node>
  <node id="130851" label="SLC35B2" cy:nodeId="108572">
    <graphics y="-504.8074469576038" z="0.0" x="-381.5399245522251"/>
  </node>
  <node id="130908" label="PIGL" cy:nodeId="108578">
    <graphics y="23.202345370277044" z="0.0" x="86.44002539894677"/>
  </node>
  <node id="130714" label="EXT1" cy:nodeId="108580">
    <graphics y="-891.0446906099476" z="0.0" x="1027.034294197775"/>
  </node>
  <node id="130694" label="ST3GAL1" cy:nodeId="108579">
    <graphics y="-984.1656012544788" z="0.0" x="527.9113083579311"/>
  </node>
  <node id="130690" label="EZH2" cy:nodeId="108582">
    <graphics y="746.0894036283337" z="0.0" x="-631.8334426186314"/>
  </node>
  <node id="130655" label="UGP2" cy:nodeId="108584">
    <graphics y="622.8636345853649" z="0.0" x="-693.7984694741001"/>
  </node>
  <node id="130834" label="SLC35A4" cy:nodeId="108586">
    <graphics y="-676.4560065279163" z="0.0" x="526.6463547446499"/>
  </node>
  <node id="130824" label="HEXB" cy:nodeId="108585">
    <graphics y="-621.3794684419788" z="0.0" x="1179.7001877524624"/>
  </node>
  <node id="130896" label="SLC35C1" cy:nodeId="108588">
    <graphics y="-600.3099493990101" z="0.0" x="157.55196387550927"/>
  </node>
  <node id="130665" label="GMEB2" cy:nodeId="108589">
    <graphics y="-737.1519293794788" z="0.0" x="-129.33027260520362"/>
  </node>
  <node id="130656" label="HDAC2" cy:nodeId="108592">
    <graphics y="828.9657464017712" z="0.0" x="-515.0228957436314"/>
  </node>
  <node id="130653" label="HDAC6" cy:nodeId="108593">
    <graphics y="-382.9938178072132" z="0.0" x="-277.1006392739048"/>
  </node>
  <node id="130648" label="HIRA" cy:nodeId="108595">
    <graphics y="-354.56748724080694" z="0.0" x="-139.21847527243995"/>
  </node>
  <node id="130570" label="NCAPG" cy:nodeId="108602">
    <graphics y="766.4467644681774" z="0.0" x="-710.0513991616001"/>
  </node>
  <node id="130580" label="MLLT1" cy:nodeId="108601">
    <graphics y="-290.1185736665882" z="0.0" x="-549.9775771401157"/>
  </node>
  <node id="130799" label="GALNT9" cy:nodeId="108605">
    <graphics y="-351.1541266451038" z="0.0" x="-778.4600905678501"/>
  </node>
  <node id="130529" label="RBCK1" cy:nodeId="108610">
    <graphics y="-616.8457770357288" z="0.0" x="-458.7429274819126"/>
  </node>
  <node id="130537" label="POLR3D" cy:nodeId="108609">
    <graphics y="79.00113725565302" z="0.0" x="-248.6151656410923"/>
  </node>
  <node id="130521" label="RFX2" cy:nodeId="108611">
    <graphics y="-978.9320807466663" z="0.0" x="-140.5242766640415"/>
  </node>
  <node id="130512" label="SATB1" cy:nodeId="108614">
    <graphics y="568.0077996244274" z="0.0" x="377.53105933449365"/>
  </node>
  <node id="130508" label="SFPQ" cy:nodeId="108616">
    <graphics y="925.8970818509899" z="0.0" x="-531.1531447670689"/>
  </node>
  <node id="130497" label="SNAPC1" cy:nodeId="108618">
    <graphics y="1080.804064272865" z="0.0" x="-422.76593773581885"/>
  </node>
  <node id="130495" label="SOX4" cy:nodeId="108620">
    <graphics y="677.1348137845837" z="0.0" x="-835.8867873451939"/>
  </node>
  <node id="130478" label="TAL1" cy:nodeId="108624">
    <graphics y="-915.5801520357288" z="0.0" x="305.976219246603"/>
  </node>
  <node id="130460" label="THAP1" cy:nodeId="108626">
    <graphics y="1394.0780510892712" z="0.0" x="-587.8046340248814"/>
  </node>
  <node id="130461" label="TFE3" cy:nodeId="108625">
    <graphics y="-291.9100775728382" z="0.0" x="990.7385178305874"/>
  </node>
  <node id="130455" label="TRRAP" cy:nodeId="108628">
    <graphics y="-141.88172674276007" z="0.0" x="-706.2375563881626"/>
  </node>
  <node id="130457" label="TP53" cy:nodeId="108627">
    <graphics y="155.80025720499384" z="0.0" x="-460.492042472147"/>
  </node>
  <node id="130452" label="UBE2I" cy:nodeId="108629">
    <graphics y="1766.9174981107556" z="0.0" x="-1701.3038558266392"/>
  </node>
  <node id="130878" label="C1GALT1" cy:nodeId="109670">
    <graphics y="1243.5695061673962" z="0.0" x="21.88825995705224"/>
  </node>
  <node id="130609" label="UXS1" cy:nodeId="109669">
    <graphics y="594.5419182767712" z="0.0" x="-527.0651625893345"/>
  </node>
  <node id="130784" label="SMPD1" cy:nodeId="109673">
    <graphics y="-324.06834173299444" z="0.0" x="1572.260368416525"/>
  </node>
  <node id="130630" label="GLB1" cy:nodeId="109675">
    <graphics y="-393.87428045369757" z="0.0" x="1069.0646897055874"/>
  </node>
  <node id="130671" label="GATA3" cy:nodeId="109677">
    <graphics y="-1150.0321784029163" z="0.0" x="513.7075119712124"/>
  </node>
  <node id="130761" label="NAGLU" cy:nodeId="109680">
    <graphics y="-582.4737067232288" z="0.0" x="-274.6567000649204"/>
  </node>
  <node id="130797" label="XYLT2" cy:nodeId="109684">
    <graphics y="-271.59299993611944" z="0.0" x="-364.1296157143345"/>
  </node>
  <node id="130869" label="PIGG" cy:nodeId="109689">
    <graphics y="258.5259728422009" z="0.0" x="-142.55795281150245"/>
  </node>
  <node id="130443" label="WRNIP1" cy:nodeId="109692">
    <graphics y="-229.29072332479132" z="0.0" x="-756.8694533608189"/>
  </node>
  <node id="130927" label="AEBP2" cy:nodeId="110787">
    <graphics y="1112.2390618314587" z="0.0" x="-58.2985390923252"/>
  </node>
  <node id="130787" label="BTAF1" cy:nodeId="110789">
    <graphics y="-763.0604376802601" z="0.0" x="491.8846359946499"/>
  </node>
  <node id="130755" label="CEBPG" cy:nodeId="110791">
    <graphics y="1639.6868157377087" z="0.0" x="-447.5522231362095"/>
  </node>
  <node id="130661" label="GTF3C1" cy:nodeId="110795">
    <graphics y="-23.41844701863897" z="0.0" x="-598.6126784584751"/>
  </node>
  <node id="130593" label="MAFG" cy:nodeId="110799">
    <graphics y="-126.62693548299444" z="0.0" x="1069.178337166525"/>
  </node>
  <node id="130578" label="MNT" cy:nodeId="110801">
    <graphics y="-548.6346564302601" z="0.0" x="310.39104468605615"/>
  </node>
  <node id="130893" label="SGSH" cy:nodeId="110804">
    <graphics y="-520.9873785982288" z="0.0" x="976.2757492758999"/>
  </node>
  <node id="130868" label="GALK2" cy:nodeId="110806">
    <graphics y="806.0226311673962" z="0.0" x="-268.0588149330845"/>
  </node>
  <node id="130924" label="AFF4" cy:nodeId="105686">
    <graphics y="719.8063836088024" z="0.0" x="1.5896683432827103"/>
  </node>
  <node id="130766" label="FUT7" cy:nodeId="105685">
    <graphics y="-543.6504645357288" z="0.0" x="-770.3866042397251"/>
  </node>
  <node id="130542" label="PIAS4" cy:nodeId="110808">
    <graphics y="-908.8241705904163" z="0.0" x="659.6530075766811"/>
  </node>
  <node id="130922" label="STT3B" cy:nodeId="105688">
    <graphics y="616.7665886869274" z="0.0" x="-4.358680655740727"/>
  </node>
  <node id="130553" label="NR1H3" cy:nodeId="110807">
    <graphics y="-614.7748541841663" z="0.0" x="-914.9417800209751"/>
  </node>
  <node id="130923" label="MAN1A2" cy:nodeId="105687">
    <graphics y="897.3760857572399" z="0.0" x="-67.41689996936225"/>
  </node>
  <node id="130534" label="PSIP1" cy:nodeId="110810">
    <graphics y="836.9492669095837" z="0.0" x="183.76113135597802"/>
  </node>
  <node id="130876" label="FUT11" cy:nodeId="105690">
    <graphics y="566.7350640287243" z="0.0" x="258.409080574728"/>
  </node>
  <node id="130875" label="NEU3" cy:nodeId="105689">
    <graphics y="305.98900079630243" z="0.0" x="-256.1534041664829"/>
  </node>
  <node id="130496" label="SND1" cy:nodeId="110812">
    <graphics y="-542.1860480318226" z="0.0" x="-615.2710036537876"/>
  </node>
  <node id="130925" label="COG5" cy:nodeId="105692">
    <graphics y="876.1588616361462" z="0.0" x="87.46967322609521"/>
  </node>
  <node id="130539" label="MAN2A1" cy:nodeId="105694">
    <graphics y="1297.5027337064587" z="0.0" x="-196.59767906882666"/>
  </node>
  <node id="130493" label="SP4" cy:nodeId="110813">
    <graphics y="945.6447625150524" z="0.0" x="-628.0507888100376"/>
  </node>
  <node id="130916" label="SLC35F5" cy:nodeId="105696">
    <graphics y="702.4108757963024" z="0.0" x="-98.40728943564795"/>
  </node>
  <node id="130458" label="TOP2B" cy:nodeId="110815">
    <graphics y="499.10756158731806" z="0.0" x="82.39579016945459"/>
  </node>
  <node id="130921" label="SLC35A3" cy:nodeId="105695">
    <graphics y="838.5148797025524" z="0.0" x="-119.64916222312354"/>
  </node>
  <node id="130643" label="ST8SIA6" cy:nodeId="105698">
    <graphics y="-827.5742926607288" z="0.0" x="-1375.5376052162876"/>
  </node>
  <node id="130612" label="GALNT10" cy:nodeId="105697">
    <graphics y="1496.0891594877087" z="0.0" x="343.1963730551968"/>
  </node>
  <node id="130813" label="RTF1" cy:nodeId="105700">
    <graphics y="842.9072136869274" z="0.0" x="-609.2295607826939"/>
  </node>
  <node id="130907" label="ARID2" cy:nodeId="105699">
    <graphics y="1258.4537835111462" z="0.0" x="-481.134132315897"/>
  </node>
  <node id="130881" label="SLC35A5" cy:nodeId="105702">
    <graphics y="1125.6431145658337" z="0.0" x="22.40161139748193"/>
  </node>
  <node id="130882" label="ATF1" cy:nodeId="105701">
    <graphics y="1240.2880120267712" z="0.0" x="-263.88707726218604"/>
  </node>
  <node id="130877" label="ATF2" cy:nodeId="105704">
    <graphics y="604.5399651517712" z="0.0" x="-106.33830635764502"/>
  </node>
  <node id="130912" label="GALNT4" cy:nodeId="105703">
    <graphics y="735.5804314603649" z="0.0" x="543.7174607016811"/>
  </node>
  <node id="130815" label="UGGT1" cy:nodeId="105705">
    <graphics y="1132.5646233548962" z="0.0" x="-328.7342910073032"/>
  </node>
  <node id="130850" label="ATF7IP" cy:nodeId="105710">
    <graphics y="1000.4543328275524" z="0.0" x="415.2656479575405"/>
  </node>
  <node id="130849" label="ATRX" cy:nodeId="105712">
    <graphics y="707.7055535306774" z="0.0" x="160.56876380226709"/>
  </node>
  <node id="130919" label="ALG10" cy:nodeId="105711">
    <graphics y="761.7556633939587" z="0.0" x="31.277511666036617"/>
  </node>
  <node id="130848" label="BACH1" cy:nodeId="105714">
    <graphics y="362.72520685098993" z="0.0" x="745.9305954673061"/>
  </node>
  <node id="130886" label="FKTN" cy:nodeId="105713">
    <graphics y="615.2462639798962" z="0.0" x="-206.72040550925635"/>
  </node>
  <node id="130827" label="MAN1A1" cy:nodeId="105716">
    <graphics y="233.54889154337275" z="0.0" x="356.9336777426968"/>
  </node>
  <node id="130847" label="CSGALNACT2" cy:nodeId="105715">
    <graphics y="76.40953874491083" z="0.0" x="997.2775803305874"/>
  </node>
  <node id="130856" label="CHST11" cy:nodeId="105718">
    <graphics y="-828.1503424654163" z="0.0" x="-716.8213576576939"/>
  </node>
  <node id="130862" label="DPM3" cy:nodeId="105722">
    <graphics y="-655.7170538911976" z="0.0" x="-138.97959130027198"/>
  </node>
  <node id="130843" label="BATF" cy:nodeId="105721">
    <graphics y="-605.4074835786976" z="0.0" x="358.0664902426968"/>
  </node>
  <node id="130902" label="MGAT1" cy:nodeId="105724">
    <graphics y="-547.5761237154163" z="0.0" x="910.7902756430874"/>
  </node>
  <node id="130819" label="BMI1" cy:nodeId="105726">
    <graphics y="951.1631951322399" z="0.0" x="242.23088843605615"/>
  </node>
  <node id="130832" label="BCAT1" cy:nodeId="105725">
    <graphics y="891.7839837064587" z="0.0" x="397.79106910011865"/>
  </node>
  <node id="130817" label="BRCA1" cy:nodeId="105728">
    <graphics y="906.7453484525524" z="0.0" x="-377.63874047019385"/>
  </node>
  <node id="130917" label="ALG10B" cy:nodeId="105727">
    <graphics y="696.3655266752087" z="0.0" x="58.87966162941552"/>
  </node>
  <node id="130814" label="PIGN" cy:nodeId="105730">
    <graphics y="810.9723381986462" z="0.0" x="-335.694923331522"/>
  </node>
  <node id="130816" label="PIGW" cy:nodeId="105729">
    <graphics y="765.3470330228649" z="0.0" x="-354.574317862772"/>
  </node>
  <node id="130725" label="SLC35E3" cy:nodeId="105732">
    <graphics y="1279.3920159330212" z="0.0" x="-98.11204521872901"/>
  </node>
  <node id="130926" label="FAM20B" cy:nodeId="105731">
    <graphics y="862.4464592923962" z="0.0" x="-368.8249282143345"/>
  </node>
  <node id="130808" label="ALG12" cy:nodeId="105734">
    <graphics y="-404.83875799276007" z="0.0" x="-127.33540337302588"/>
  </node>
  <node id="130809" label="BRD1" cy:nodeId="105733">
    <graphics y="-180.78632879354132" z="0.0" x="-242.35849755027198"/>
  </node>
  <node id="130895" label="PMM1" cy:nodeId="105735">
    <graphics y="-488.01197576619757" z="0.0" x="846.2076950766811"/>
  </node>
  <node id="130783" label="CASP8AP2" cy:nodeId="105738">
    <graphics y="726.2784295072399" z="0.0" x="275.9264755942593"/>
  </node>
  <node id="130595" label="HYAL2" cy:nodeId="105737">
    <graphics y="-316.9043707857288" z="0.0" x="197.20381934425927"/>
  </node>
  <node id="130520" label="GALNS" cy:nodeId="105740">
    <graphics y="-1284.3860602388538" z="0.0" x="-134.64472954490088"/>
  </node>
  <node id="130781" label="CBFB" cy:nodeId="105739">
    <graphics y="998.0789055814587" z="0.0" x="-259.70861046531104"/>
  </node>
  <node id="130777" label="CMAS" cy:nodeId="105742">
    <graphics y="1015.7155632963024" z="0.0" x="-1190.37024681785"/>
  </node>
  <node id="130780" label="CBX3" cy:nodeId="105741">
    <graphics y="839.2892937650524" z="0.0" x="-755.5208815834751"/>
  </node>
  <node id="130866" label="RFNG" cy:nodeId="105744">
    <graphics y="-480.44959783651007" z="0.0" x="-204.6394118569126"/>
  </node>
  <node id="130772" label="CBX4" cy:nodeId="105743">
    <graphics y="-771.4134650240101" z="0.0" x="-21.062393119119633"/>
  </node>
  <node id="130807" label="ST6GALNAC6" cy:nodeId="105746">
    <graphics y="-279.76063299276007" z="0.0" x="-35.555049826883305"/>
  </node>
  <node id="130674" label="MAN2A2" cy:nodeId="105748">
    <graphics y="-214.90504217244757" z="0.0" x="-125.25297920920752"/>
  </node>
  <node id="130855" label="ST3GAL3" cy:nodeId="105747">
    <graphics y="-294.52369451619757" z="0.0" x="-416.50666039206885"/>
  </node>
  <node id="130647" label="MGAT3" cy:nodeId="105750">
    <graphics y="-687.8066535005726" z="0.0" x="195.4271164633999"/>
  </node>
  <node id="130863" label="IDUA" cy:nodeId="105749">
    <graphics y="-673.9736456880726" z="0.0" x="-268.32753746726416"/>
  </node>
  <node id="130858" label="B3GAT3" cy:nodeId="105754">
    <graphics y="-577.5119757661976" z="0.0" x="-130.58821099021338"/>
  </node>
  <node id="130732" label="GALK1" cy:nodeId="105753">
    <graphics y="-694.0603156099476" z="0.0" x="-6.643062522195805"/>
  </node>
  <node id="130769" label="CDK8" cy:nodeId="105756">
    <graphics y="733.9221062650524" z="0.0" x="-198.96262352683448"/>
  </node>
  <node id="130770" label="CCDC101" cy:nodeId="105755">
    <graphics y="-1022.2896246919788" z="0.0" x="-254.21297447898291"/>
  </node>
  <node id="130840" label="DPM2" cy:nodeId="105758">
    <graphics y="-587.4773077974476" z="0.0" x="-227.80770104148291"/>
  </node>
  <node id="130768" label="CDK9" cy:nodeId="105757">
    <graphics y="-414.67945623494757" z="0.0" x="-317.2822036049595"/>
  </node>
  <node id="130854" label="MAN1B1" cy:nodeId="105760">
    <graphics y="-303.09202337361944" z="0.0" x="-191.76448052146338"/>
  </node>
  <node id="130801" label="PIGQ" cy:nodeId="105759">
    <graphics y="-383.6375250826038" z="0.0" x="-179.76293938376807"/>
  </node>
  <node id="130857" label="MOGS" cy:nodeId="105762">
    <graphics y="-558.4871344576038" z="0.0" x="-175.93292229392432"/>
  </node>
  <node id="130861" label="POMT1" cy:nodeId="105761">
    <graphics y="-332.4979681978382" z="0.0" x="-467.029395987772"/>
  </node>
  <node id="130765" label="CEBPA" cy:nodeId="105764">
    <graphics y="-718.0297980318226" z="0.0" x="-315.8601607582798"/>
  </node>
  <node id="130767" label="CHST12" cy:nodeId="105763">
    <graphics y="-223.00642156697882" z="0.0" x="-266.28810875632666"/>
  </node>
  <node id="130837" label="MFNG" cy:nodeId="105766">
    <graphics y="-466.96778631307257" z="0.0" x="135.7888107993374"/>
  </node>
  <node id="130757" label="NAGK" cy:nodeId="105765">
    <graphics y="-669.9845099458851" z="0.0" x="911.8844528891811"/>
  </node>
  <node id="130477" label="A4GALT" cy:nodeId="105768">
    <graphics y="-1095.7136969576038" z="0.0" x="256.32048804543115"/>
  </node>
  <node id="130759" label="CEBPB" cy:nodeId="105767">
    <graphics y="-688.0054450044788" z="0.0" x="973.7023850180874"/>
  </node>
  <node id="130751" label="CHD2" cy:nodeId="105770">
    <graphics y="588.1682610502087" z="0.0" x="-53.906229903482426"/>
  </node>
  <node id="130753" label="CHD1" cy:nodeId="105769">
    <graphics y="818.0486321439587" z="0.0" x="10.115745613790523"/>
  </node>
  <node id="130914" label="OGT" cy:nodeId="105771">
    <graphics y="482.69078302286493" z="0.0" x="-6.937164237283696"/>
  </node>
  <node id="130749" label="CHD8" cy:nodeId="105774">
    <graphics y="565.2310357084118" z="0.0" x="-166.42800133445166"/>
  </node>
  <node id="130750" label="CHD4" cy:nodeId="105773">
    <graphics y="479.1135735502087" z="0.0" x="-526.4343947670689"/>
  </node>
  <node id="130707" label="LAMP3" cy:nodeId="105776">
    <graphics y="-1343.0976080904163" z="0.0" x="606.3029709555874"/>
  </node>
  <node id="130748" label="CIITA" cy:nodeId="105775">
    <graphics y="293.60753106973993" z="0.0" x="586.1174851157436"/>
  </node>
  <node id="130800" label="GAL3ST4" cy:nodeId="105778">
    <graphics y="314.8379693021618" z="0.0" x="-555.9678420326939"/>
  </node>
  <node id="130771" label="MAN2B1" cy:nodeId="105777">
    <graphics y="-753.5232672701038" z="0.0" x="359.6148606040249"/>
  </node>
  <node id="130747" label="CPSF3L" cy:nodeId="105780">
    <graphics y="-361.10117864705694" z="0.0" x="-226.41323082663916"/>
  </node>
  <node id="130585" label="DSE" cy:nodeId="105779">
    <graphics y="-1655.7633795747913" z="0.0" x="1126.025016854025"/>
  </node>
  <node id="130865" label="B4GALT7" cy:nodeId="105782">
    <graphics y="-500.14075994588507" z="0.0" x="-263.5487593910923"/>
  </node>
  <node id="130730" label="B3GALT6" cy:nodeId="105781">
    <graphics y="-415.8517279634632" z="0.0" x="-489.5163649819126"/>
  </node>
  <node id="130669" label="B4GALNT4" cy:nodeId="105784">
    <graphics y="-1089.3292975435413" z="0.0" x="567.5617600180874"/>
  </node>
  <node id="130802" label="POMGNT1" cy:nodeId="105783">
    <graphics y="-164.30393743611944" z="0.0" x="-297.3202742836704"/>
  </node>
  <node id="130743" label="CREB3L4" cy:nodeId="105788">
    <graphics y="676.6713128080212" z="0.0" x="425.58989722511865"/>
  </node>
  <node id="130722" label="GMPPA" cy:nodeId="105787">
    <graphics y="-535.2153449068226" z="0.0" x="449.87725074074365"/>
  </node>
  <node id="130742" label="CREBBP" cy:nodeId="105790">
    <graphics y="-1252.0100836763538" z="0.0" x="1406.793083260275"/>
  </node>
  <node id="130864" label="B4GALT3" cy:nodeId="105789">
    <graphics y="-517.2465949068226" z="0.0" x="-162.25270073630713"/>
  </node>
  <node id="130712" label="COG7" cy:nodeId="105791">
    <graphics y="-220.9917426119007" z="0.0" x="-425.57611839988135"/>
  </node>
  <node id="130739" label="CTBP1" cy:nodeId="105793">
    <graphics y="-704.6435675630726" z="0.0" x="-200.43173973777198"/>
  </node>
  <node id="130733" label="E2F1" cy:nodeId="105796">
    <graphics y="-619.5538458833851" z="0.0" x="-363.1684951088657"/>
  </node>
  <node id="130735" label="DEK" cy:nodeId="105795">
    <graphics y="1517.7183098783337" z="0.0" x="-577.5052871010532"/>
  </node>
  <node id="130745" label="ALG3" cy:nodeId="105797">
    <graphics y="-464.7949957857288" z="0.0" x="-299.6122359535923"/>
  </node>
  <node id="130488" label="KHK" cy:nodeId="105800">
    <graphics y="-838.4009528169788" z="0.0" x="-345.87641136863135"/>
  </node>
  <node id="130879" label="DPM1" cy:nodeId="105799">
    <graphics y="1250.8459954252087" z="0.0" x="-699.6200026772251"/>
  </node>
  <node id="130798" label="FUT1" cy:nodeId="105802">
    <graphics y="-198.79957342244757" z="0.0" x="127.72058875343896"/>
  </node>
  <node id="130720" label="E2F6" cy:nodeId="105801">
    <graphics y="700.4368767728649" z="0.0" x="-412.343604972147"/>
  </node>
  <node id="130791" label="ST3GAL2" cy:nodeId="105806">
    <graphics y="-175.34539556600225" z="0.0" x="360.9942246176968"/>
  </node>
  <node id="130786" label="CSGALNACT1" cy:nodeId="105805">
    <graphics y="-1305.9608893404163" z="0.0" x="859.0544357993374"/>
  </node>
  <node id="130679" label="B3GALT2" cy:nodeId="105808">
    <graphics y="1127.8300042142712" z="0.0" x="488.06377417824365"/>
  </node>
  <node id="130475" label="CHST3" cy:nodeId="105807">
    <graphics y="-1249.9696784029163" z="0.0" x="223.74776465675927"/>
  </node>
  <node id="130764" label="FUT4" cy:nodeId="105810">
    <graphics y="-1001.3001227388538" z="0.0" x="-597.1799392006626"/>
  </node>
  <node id="130818" label="GALNT12" cy:nodeId="105812">
    <graphics y="1261.3470940580212" z="0.0" x="475.0682297446499"/>
  </node>
  <node id="130913" label="AHR" cy:nodeId="106836">
    <graphics y="185.19120263956415" z="0.0" x="813.9031296469936"/>
  </node>
  <node id="130788" label="PIGK" cy:nodeId="106835">
    <graphics y="1163.7107415189587" z="0.0" x="-463.30768578269385"/>
  </node>
  <node id="130883" label="B3GNT2" cy:nodeId="106838">
    <graphics y="559.5967278470837" z="0.0" x="-984.2391433022251"/>
  </node>
  <node id="130717" label="EGR2" cy:nodeId="105816">
    <graphics y="-736.7642340669788" z="0.0" x="1102.6093674399624"/>
  </node>
  <node id="130841" label="TPST2" cy:nodeId="106840">
    <graphics y="-764.5583014497913" z="0.0" x="616.2573776938686"/>
  </node>
  <node id="130721" label="ST6GALNAC4" cy:nodeId="106839">
    <graphics y="-423.19151067830694" z="0.0" x="211.0491867758999"/>
  </node>
  <node id="130831" label="BCL11A" cy:nodeId="106841">
    <graphics y="571.1309990873181" z="0.0" x="34.39913184425927"/>
  </node>
  <node id="130719" label="UAP1" cy:nodeId="105820">
    <graphics y="690.0389885892712" z="0.0" x="-748.1125563881626"/>
  </node>
  <node id="130792" label="BRD4" cy:nodeId="106843">
    <graphics y="-286.4723639497913" z="0.0" x="124.15497596047021"/>
  </node>
  <node id="130711" label="ELF1" cy:nodeId="105822">
    <graphics y="964.0319085111462" z="0.0" x="-215.44196312644385"/>
  </node>
  <node id="130911" label="LFNG" cy:nodeId="106846">
    <graphics y="-476.72327947713507" z="0.0" x="914.7336960532436"/>
  </node>
  <node id="130713" label="EHMT2" cy:nodeId="105821">
    <graphics y="-331.8303656587757" z="0.0" x="-264.07070152976416"/>
  </node>
  <node id="130782" label="CBFA2T3" cy:nodeId="106845">
    <graphics y="-869.4652228365101" z="0.0" x="-114.08018868186377"/>
  </node>
  <node id="130906" label="COG6" cy:nodeId="105824">
    <graphics y="755.9640984525524" z="0.0" x="-240.57131188132666"/>
  </node>
  <node id="130873" label="COG3" cy:nodeId="105823">
    <graphics y="642.2292351713024" z="0.0" x="-141.79769890525245"/>
  </node>
  <node id="130736" label="DCP1A" cy:nodeId="106850">
    <graphics y="1049.5748772611462" z="0.0" x="204.62483985207177"/>
  </node>
  <node id="130709" label="ELF2" cy:nodeId="105825">
    <graphics y="1015.5195794095837" z="0.0" x="-492.4850844643345"/>
  </node>
  <node id="130852" label="GALT" cy:nodeId="106851">
    <graphics y="-335.3234076509632" z="0.0" x="-307.1133651039829"/>
  </node>
  <node id="130700" label="ERCC6" cy:nodeId="105830">
    <graphics y="774.2708001127087" z="0.0" x="-38.472503592752446"/>
  </node>
  <node id="130683" label="MAN1C1" cy:nodeId="106853">
    <graphics y="-1313.7057623872913" z="0.0" x="982.2300949790249"/>
  </node>
  <node id="130704" label="EP400" cy:nodeId="105829">
    <graphics y="314.6095910062634" z="0.0" x="-75.47382252433204"/>
  </node>
  <node id="130698" label="ERG" cy:nodeId="105832">
    <graphics y="200.34694147013056" z="0.0" x="24.768585274435054"/>
  </node>
  <node id="130820" label="FUCA1" cy:nodeId="106856">
    <graphics y="-575.9272589693226" z="0.0" x="1241.7487717368374"/>
  </node>
  <node id="130699" label="ERF" cy:nodeId="105831">
    <graphics y="-534.7072882661976" z="0.0" x="-222.30062096335791"/>
  </node>
  <node id="130706" label="ST6GAL1" cy:nodeId="106855">
    <graphics y="-897.2732672701038" z="0.0" x="561.5375900962124"/>
  </node>
  <node id="130636" label="ST8SIA4" cy:nodeId="105834">
    <graphics y="-739.3740973482288" z="0.0" x="1485.33776099465"/>
  </node>
  <node id="130844" label="GCNT4" cy:nodeId="106858">
    <graphics y="-1094.4967780122913" z="0.0" x="431.2991867758999"/>
  </node>
  <node id="130741" label="ST3GAL5" cy:nodeId="106857">
    <graphics y="-1104.3325934419788" z="0.0" x="1219.8037033774624"/>
  </node>
  <node id="130692" label="UST" cy:nodeId="105836">
    <graphics y="-1373.2553229341663" z="0.0" x="-301.5917739174595"/>
  </node>
  <node id="130696" label="MGAT4A" cy:nodeId="106860">
    <graphics y="-1475.1334967622913" z="0.0" x="712.2439499594936"/>
  </node>
  <node id="130567" label="CHST7" cy:nodeId="105835">
    <graphics y="-172.32871770955694" z="0.0" x="760.0273361899624"/>
  </node>
  <node id="130871" label="GALNT7" cy:nodeId="106859">
    <graphics y="736.9316887845837" z="0.0" x="-141.09474938132666"/>
  </node>
  <node id="130715" label="CHST2" cy:nodeId="105838">
    <graphics y="-895.6720099458851" z="0.0" x="1384.9953537680874"/>
  </node>
  <node id="130825" label="CHST15" cy:nodeId="106861">
    <graphics y="-787.3626227388538" z="0.0" x="951.6362229087124"/>
  </node>
  <node id="130828" label="SULT1C4" cy:nodeId="105837">
    <graphics y="312.24103021524775" z="0.0" x="156.2622757651577"/>
  </node>
  <node id="130695" label="ST8SIA1" cy:nodeId="105840">
    <graphics y="-1344.3781256685413" z="0.0" x="449.65142066261865"/>
  </node>
  <node id="130762" label="GPI" cy:nodeId="106864">
    <graphics y="-873.2977423677601" z="0.0" x="-522.8937758705845"/>
  </node>
  <node id="130677" label="GAPDH" cy:nodeId="106863">
    <graphics y="-1097.6657233247913" z="0.0" x="-737.0685500405064"/>
  </node>
  <node id="130697" label="ETS1" cy:nodeId="105839">
    <graphics y="-1269.9749274263538" z="0.0" x="389.74175269386865"/>
  </node>
  <node id="130617" label="HS3ST3B1" cy:nodeId="105841">
    <graphics y="-198.1730170259632" z="0.0" x="-993.3614577553501"/>
  </node>
  <node id="130664" label="GPS2" cy:nodeId="106865">
    <graphics y="-870.2586188326038" z="0.0" x="-29.646190573953618"/>
  </node>
  <node id="130530" label="MGAT2" cy:nodeId="106868">
    <graphics y="1209.0292229642712" z="0.0" x="-368.60126488425635"/>
  </node>
  <node id="130776" label="EXTL2" cy:nodeId="105844">
    <graphics y="695.2542595853649" z="0.0" x="-486.1169509194126"/>
  </node>
  <node id="130650" label="HIF1A" cy:nodeId="106867">
    <graphics y="-1542.0436530122913" z="0.0" x="947.7266770102749"/>
  </node>
  <node id="130691" label="EZH1" cy:nodeId="105846">
    <graphics y="401.3058648099743" z="0.0" x="128.72969825050927"/>
  </node>
  <node id="130812" label="SLC35B4" cy:nodeId="105845">
    <graphics y="1031.2838616361462" z="0.0" x="-347.74579613425635"/>
  </node>
  <node id="130634" label="IRF3" cy:nodeId="106872">
    <graphics y="-439.8004889497913" z="0.0" x="-166.90524285056495"/>
  </node>
  <node id="130637" label="IRF2" cy:nodeId="106871">
    <graphics y="-873.2135138521351" z="0.0" x="1533.537712166525"/>
  </node>
  <node id="130614" label="KDM4A" cy:nodeId="106874">
    <graphics y="99.09870386026728" z="0.0" x="-553.5557021401157"/>
  </node>
  <node id="130619" label="KDM1B" cy:nodeId="106873">
    <graphics y="-1046.5985846529163" z="0.0" x="1501.3664475180874"/>
  </node>
  <node id="130689" label="FOS" cy:nodeId="105849">
    <graphics y="-231.8328070650257" z="0.0" x="1330.0458908774624"/>
  </node>
  <node id="130544" label="GLCE" cy:nodeId="105851">
    <graphics y="1126.4712395658337" z="0.0" x="118.2364426352749"/>
  </node>
  <node id="130600" label="LEF1" cy:nodeId="106875">
    <graphics y="-1430.9101080904163" z="0.0" x="464.65996558449365"/>
  </node>
  <node id="130574" label="RPN2" cy:nodeId="105854">
    <graphics y="-1206.4036383638538" z="0.0" x="-258.9083632729282"/>
  </node>
  <node id="130684" label="FOXO1" cy:nodeId="105856">
    <graphics y="-1093.5766119966663" z="0.0" x="884.6791916587124"/>
  </node>
  <node id="130465" label="ALG6" cy:nodeId="106879">
    <graphics y="1095.5577874173962" z="0.0" x="-540.023536612772"/>
  </node>
  <node id="130880" label="GNPNAT1" cy:nodeId="105855">
    <graphics y="904.6970086088024" z="0.0" x="-299.10472862937354"/>
  </node>
  <node id="130918" label="GFPT1" cy:nodeId="106882">
    <graphics y="783.9049553861462" z="0.0" x="-173.70658867576026"/>
  </node>
  <node id="130599" label="DSEL" cy:nodeId="105857">
    <graphics y="-1625.5615973482288" z="0.0" x="504.7344895102749"/>
  </node>
  <node id="130533" label="RARA" cy:nodeId="106884">
    <graphics y="-430.68299627401007" z="0.0" x="938.9486618735561"/>
  </node>
  <node id="130822" label="NPL" cy:nodeId="105860">
    <graphics y="-495.19825506307257" z="0.0" x="1285.8481369712124"/>
  </node>
  <node id="130476" label="SULF1" cy:nodeId="106883">
    <graphics y="-1167.7710700044788" z="0.0" x="156.8042679526577"/>
  </node>
  <node id="130758" label="HK3" cy:nodeId="105859">
    <graphics y="-742.2752203951038" z="0.0" x="1004.6015549399624"/>
  </node>
  <node id="130504" label="SMAD2" cy:nodeId="106886">
    <graphics y="780.9495720853649" z="0.0" x="416.3073654868374"/>
  </node>
  <node id="130678" label="GABPA" cy:nodeId="105861">
    <graphics y="1153.6903557767712" z="0.0" x="-190.93019860007666"/>
  </node>
  <node id="130492" label="SPIB" cy:nodeId="106888">
    <graphics y="-1402.8097662935413" z="0.0" x="1240.014762947775"/>
  </node>
  <node id="130752" label="ALG13" cy:nodeId="105864">
    <graphics y="409.9335198392712" z="0.0" x="-22.398372580789555"/>
  </node>
  <node id="130668" label="GATAD1" cy:nodeId="105863">
    <graphics y="1198.2050042142712" z="0.0" x="-87.5621356270542"/>
  </node>
  <node id="130459" label="THAP11" cy:nodeId="106890">
    <graphics y="-678.4234137544788" z="0.0" x="-73.14342348792457"/>
  </node>
  <node id="130667" label="GLYR1" cy:nodeId="105866">
    <graphics y="-770.0707526216663" z="0.0" x="-525.3533400795689"/>
  </node>
  <node id="130471" label="TBX21" cy:nodeId="106889">
    <graphics y="-896.7999396333851" z="0.0" x="462.89165503761865"/>
  </node>
  <node id="130663" label="GTF2B" cy:nodeId="105868">
    <graphics y="1523.0665764798962" z="0.0" x="-831.2946852944126"/>
  </node>
  <node id="130723" label="COG4" cy:nodeId="106892">
    <graphics y="-1026.3501715669788" z="0.0" x="-27.286521842264165"/>
  </node>
  <node id="130666" label="ALG1" cy:nodeId="105867">
    <graphics y="-380.9592719087757" z="0.0" x="-564.4989089272251"/>
  </node>
  <node id="130805" label="COG8" cy:nodeId="106891">
    <graphics y="-67.66569280721319" z="0.0" x="-209.82443993308448"/>
  </node>
  <node id="130439" label="ZBTB10" cy:nodeId="106894">
    <graphics y="638.1524529447399" z="0.0" x="79.87184912941552"/>
  </node>
  <node id="130486" label="STT3A" cy:nodeId="106893">
    <graphics y="287.4890160550915" z="0.0" x="-937.8610305092564"/>
  </node>
  <node id="130525" label="CTBS" cy:nodeId="105869">
    <graphics y="823.3395256986462" z="0.0" x="1010.1725998618374"/>
  </node>
  <node id="130659" label="H2AFX" cy:nodeId="105872">
    <graphics y="-626.1460089693226" z="0.0" x="-310.5274733803501"/>
  </node>
  <node id="130662" label="GTF2I" cy:nodeId="105871">
    <graphics y="884.9772210111462" z="0.0" x="-130.02257530906104"/>
  </node>
  <node id="130803" label="PIGO" cy:nodeId="105874">
    <graphics y="-111.86735296346319" z="0.0" x="-256.4424361489048"/>
  </node>
  <node id="130658" label="HCFC1" cy:nodeId="105873">
    <graphics y="-283.3075385103382" z="0.0" x="-302.53786461570166"/>
  </node>
  <node id="130651" label="HECTD1" cy:nodeId="105875">
    <graphics y="1154.2777581205212" z="0.0" x="-747.3056105873814"/>
  </node>
  <node id="130737" label="DPAGT1" cy:nodeId="105878">
    <graphics y="-214.15974187947882" z="0.0" x="-191.63529198386573"/>
  </node>
  <node id="130649" label="HINFP" cy:nodeId="105877">
    <graphics y="-138.46983099080694" z="0.0" x="-104.1460265419712"/>
  </node>
  <node id="130746" label="TSTA3" cy:nodeId="105880">
    <graphics y="-644.5504279146351" z="0.0" x="-218.53427880027198"/>
  </node>
  <node id="130642" label="IKZF1" cy:nodeId="105882">
    <graphics y="1507.6252923002087" z="0.0" x="70.01590735695459"/>
  </node>
  <node id="130835" label="GPAA1" cy:nodeId="105881">
    <graphics y="-603.2811408052601" z="0.0" x="-173.31857292868995"/>
  </node>
  <node id="130635" label="LIPA" cy:nodeId="105884">
    <graphics y="-892.6276984224476" z="0.0" x="1273.019157479025"/>
  </node>
  <node id="130899" label="GM2A" cy:nodeId="105883">
    <graphics y="-688.2872443208851" z="0.0" x="1035.3569260337124"/>
  </node>
  <node id="130638" label="INTS3" cy:nodeId="105886">
    <graphics y="5.913755892737981" z="0.0" x="-372.2248305580845"/>
  </node>
  <node id="130639" label="INO80" cy:nodeId="105885">
    <graphics y="394.44093561075556" z="0.0" x="-608.7292556069126"/>
  </node>
  <node id="130633" label="IRF4" cy:nodeId="105888">
    <graphics y="-989.9129157076038" z="0.0" x="796.0836106040249"/>
  </node>
  <node id="130629" label="IRF8" cy:nodeId="105890">
    <graphics y="-731.6717658052601" z="0.0" x="1189.3906174399624"/>
  </node>
  <node id="130631" label="IRF5" cy:nodeId="105889">
    <graphics y="-614.7911505708851" z="0.0" x="818.5565720298061"/>
  </node>
  <node id="130625" label="JMJD1C" cy:nodeId="105892">
    <graphics y="889.1266350736462" z="0.0" x="521.8857346274624"/>
  </node>
  <node id="130626" label="JDP2" cy:nodeId="105891">
    <graphics y="-717.6441168794788" z="0.0" x="688.9797287680874"/>
  </node>
  <node id="130556" label="MGAT5" cy:nodeId="105893">
    <graphics y="182.22020196817743" z="0.0" x="-581.6856765053501"/>
  </node>
  <node id="130806" label="FKRP" cy:nodeId="105896">
    <graphics y="-301.6900153169788" z="0.0" x="-144.92710106589698"/>
  </node>
  <node id="130624" label="JUNB" cy:nodeId="105898">
    <graphics y="-477.0517096529163" z="0.0" x="1020.9869309165249"/>
  </node>
  <node id="130623" label="JUND" cy:nodeId="105899">
    <graphics y="-829.1037726411976" z="0.0" x="-263.29059593894385"/>
  </node>
  <node id="130620" label="KDM1A" cy:nodeId="105901">
    <graphics y="528.4566826810681" z="0.0" x="-401.3658522866001"/>
  </node>
  <node id="130611" label="KDM5A" cy:nodeId="105904">
    <graphics y="789.2880730619274" z="0.0" x="93.15692908547021"/>
  </node>
  <node id="130616" label="KDM3A" cy:nodeId="105903">
    <graphics y="510.45729303263056" z="0.0" x="-258.431495597147"/>
  </node>
  <node id="130915" label="HS2ST1" cy:nodeId="105906">
    <graphics y="851.5695672025524" z="0.0" x="-32.16196816184424"/>
  </node>
  <node id="130898" label="GNS" cy:nodeId="105905">
    <graphics y="-664.0293097505726" z="0.0" x="1111.5483322837124"/>
  </node>
  <node id="130810" label="B3GALNT2" cy:nodeId="105908">
    <graphics y="1327.7968010892712" z="0.0" x="-370.2034987709751"/>
  </node>
  <node id="130610" label="KDM5B" cy:nodeId="105907">
    <graphics y="474.3530755033337" z="0.0" x="-433.7700576088657"/>
  </node>
  <node id="130584" label="HS3ST1" cy:nodeId="105910">
    <graphics y="-1589.8661627779163" z="0.0" x="1232.500602791525"/>
  </node>
  <node id="130568" label="RENBP" cy:nodeId="105912">
    <graphics y="-484.8546881685413" z="0.0" x="638.6900559165249"/>
  </node>
  <node id="130596" label="LYL1" cy:nodeId="105911">
    <graphics y="-365.8551764497913" z="0.0" x="-14.874046256326665"/>
  </node>
  <node id="130594" label="MAFB" cy:nodeId="105914">
    <graphics y="-508.8480963716663" z="0.0" x="1412.6909104087124"/>
  </node>
  <node id="130590" label="MAZ" cy:nodeId="105916">
    <graphics y="-532.5863165865101" z="0.0" x="-307.74498741843604"/>
  </node>
  <node id="130591" label="MAX" cy:nodeId="105915">
    <graphics y="704.3646111478649" z="0.0" x="-947.4562453530064"/>
  </node>
  <node id="130606" label="MGAT4B" cy:nodeId="105918">
    <graphics y="-418.87684393026007" z="0.0" x="34.74481971047021"/>
  </node>
  <node id="130731" label="B4GALT2" cy:nodeId="105917">
    <graphics y="-383.8651862154163" z="0.0" x="-423.5991591713657"/>
  </node>
  <node id="130601" label="ST6GALNAC1" cy:nodeId="105920">
    <graphics y="-789.4431281099476" z="0.0" x="212.17830664894677"/>
  </node>
  <node id="130555" label="IDS" cy:nodeId="105922">
    <graphics y="-233.36750555135382" z="0.0" x="-869.6779860756626"/>
  </node>
  <node id="130905" label="ARID3A" cy:nodeId="107970">
    <graphics y="-543.3375372896351" z="0.0" x="823.9756394126186"/>
  </node>
  <node id="130588" label="MECP2" cy:nodeId="105921">
    <graphics y="383.6795220365368" z="0.0" x="-131.0203818581333"/>
  </node>
  <node id="130836" label="NEU1" cy:nodeId="107971">
    <graphics y="-422.34522771932257" z="0.0" x="989.9531174399624"/>
  </node>
  <node id="130903" label="NDST1" cy:nodeId="105923">
    <graphics y="-439.91087102986944" z="0.0" x="733.7252121665249"/>
  </node>
  <node id="130583" label="MEF2C" cy:nodeId="105926">
    <graphics y="-994.3202643404163" z="0.0" x="871.9844895102749"/>
  </node>
  <node id="130586" label="MEF2A" cy:nodeId="105925">
    <graphics y="-1431.1167731294788" z="0.0" x="1058.78893286965"/>
  </node>
  <node id="130581" label="MEIS1" cy:nodeId="105928">
    <graphics y="-1180.2721686372913" z="0.0" x="-924.6525344155064"/>
  </node>
  <node id="130870" label="FUT8" cy:nodeId="107976">
    <graphics y="604.3422722806774" z="0.0" x="-388.708351065897"/>
  </node>
  <node id="130789" label="BRD7" cy:nodeId="107977">
    <graphics y="1373.0043206205212" z="0.0" x="-702.7884597084751"/>
  </node>
  <node id="130480" label="PIGX" cy:nodeId="107980">
    <graphics y="1227.6119866361462" z="0.0" x="-1006.1967849037876"/>
  </node>
  <node id="130572" label="SLC35F2" cy:nodeId="107979">
    <graphics y="136.45660638712275" z="0.0" x="-818.8764724037876"/>
  </node>
  <node id="130577" label="MRE11A" cy:nodeId="105931">
    <graphics y="266.870974062904" z="0.0" x="-667.8521193764439"/>
  </node>
  <node id="130842" label="CTSA" cy:nodeId="107984">
    <graphics y="-691.2569098482288" z="0.0" x="414.1057968833218"/>
  </node>
  <node id="130575" label="MYBL2" cy:nodeId="105935">
    <graphics y="-899.0561652193226" z="0.0" x="-205.98635094382666"/>
  </node>
  <node id="130833" label="B3GNT8" cy:nodeId="107983">
    <graphics y="-617.1581549654163" z="0.0" x="615.7058029868374"/>
  </node>
  <node id="130794" label="SLC35C2" cy:nodeId="107986">
    <graphics y="-507.96534490682257" z="0.0" x="-478.4169997475376"/>
  </node>
  <node id="130724" label="E2F4" cy:nodeId="107987">
    <graphics y="-584.4657111177601" z="0.0" x="-36.86871712424659"/>
  </node>
  <node id="130571" label="MZF1" cy:nodeId="105942">
    <graphics y="-342.42295599080694" z="0.0" x="-85.26025383689307"/>
  </node>
  <node id="130566" label="NFATC1" cy:nodeId="105944">
    <graphics y="-193.98484563924444" z="0.0" x="506.49614722511865"/>
  </node>
  <node id="130560" label="NFYC" cy:nodeId="105946">
    <graphics y="-957.3831915865101" z="0.0" x="63.27751929543115"/>
  </node>
  <node id="130563" label="NFIC" cy:nodeId="105945">
    <graphics y="-450.4309821138538" z="0.0" x="-421.46869652488135"/>
  </node>
  <node id="130554" label="NPAT" cy:nodeId="105948">
    <graphics y="1165.7743401517712" z="0.0" x="239.02162940285302"/>
  </node>
  <node id="130557" label="HS6ST1" cy:nodeId="107996">
    <graphics y="-95.924436093346" z="0.0" x="-871.7555617592564"/>
  </node>
  <node id="130559" label="NIPBL" cy:nodeId="105947">
    <graphics y="1163.5972161283337" z="0.0" x="363.8494492270718"/>
  </node>
  <node id="130763" label="ST3GAL4" cy:nodeId="107998">
    <graphics y="-1053.8520026216663" z="0.0" x="-488.4281081459751"/>
  </node>
  <node id="130920" label="SLC35D1" cy:nodeId="105950">
    <graphics y="692.5609002103649" z="0.0" x="-148.30165093161963"/>
  </node>
  <node id="130552" label="NR2C2" cy:nodeId="105949">
    <graphics y="467.2512688627087" z="0.0" x="-71.30498092391394"/>
  </node>
  <node id="130613" label="KDM4C" cy:nodeId="107997">
    <graphics y="1217.7262444486462" z="0.0" x="157.49208838722802"/>
  </node>
  <node id="130829" label="PIGM" cy:nodeId="105954">
    <graphics y="954.7207512845837" z="0.0" x="46.858436653829585"/>
  </node>
  <node id="130463" label="SLC35A1" cy:nodeId="108001">
    <graphics y="701.1595330228649" z="0.0" x="882.2677536704311"/>
  </node>
  <node id="130545" label="PIAS1" cy:nodeId="105958">
    <graphics y="1012.5617547025524" z="0.0" x="318.598777840353"/>
  </node>
  <node id="130592" label="MAFK" cy:nodeId="108006">
    <graphics y="-482.51734685994757" z="0.0" x="-106.9061583779087"/>
  </node>
  <node id="130547" label="PHF6" cy:nodeId="105957">
    <graphics y="976.1432976713024" z="0.0" x="-420.9432753823032"/>
  </node>
  <node id="130891" label="SLC17A5" cy:nodeId="108005">
    <graphics y="1766.9174981107556" z="0.0" x="-1900.8706816933384"/>
  </node>
  <node id="130451" label="DAD1" cy:nodeId="108008">
    <graphics y="1757.6199212064587" z="0.0" x="-1800.8706816933384"/>
  </node>
  <node id="130538" label="POLR3A" cy:nodeId="105960">
    <graphics y="529.2808098783337" z="0.0" x="-315.5093611977329"/>
  </node>
  <node id="130540" label="POLR2B" cy:nodeId="105959">
    <graphics y="1028.39512872599" z="0.0" x="-169.94296257712745"/>
  </node>
  <node id="130860" label="CHPF2" cy:nodeId="108007">
    <graphics y="-448.2946295747913" z="0.0" x="-369.1671218178501"/>
  </node>
  <node id="130536" label="PRDM1" cy:nodeId="105962">
    <graphics y="-1526.8579840669788" z="0.0" x="540.4539108969936"/>
  </node>
  <node id="130573" label="MYC" cy:nodeId="108009">
    <graphics y="115.01319360636103" z="0.0" x="-398.54889672019385"/>
  </node>
  <node id="130505" label="MGAT5B" cy:nodeId="108014">
    <graphics y="43.38618898294794" z="0.0" x="299.1612168051968"/>
  </node>
  <node id="130549" label="UGGT2" cy:nodeId="105966">
    <graphics y="-342.54575872518194" z="0.0" x="-1705.81360619285"/>
  </node>
  <node id="130449" label="CHST10" cy:nodeId="108013">
    <graphics y="-6.763570309654597" z="0.0" x="217.7320481040249"/>
  </node>
  <node id="130532" label="RB1" cy:nodeId="105965">
    <graphics y="1466.2393059720837" z="0.0" x="185.35805518410302"/>
  </node>
  <node id="130528" label="RBL2" cy:nodeId="105968">
    <graphics y="1296.6208977689587" z="0.0" x="88.7903977133999"/>
  </node>
  <node id="130558" label="NOTCH1" cy:nodeId="108016">
    <graphics y="-124.5598120699085" z="0.0" x="-414.71210472800635"/>
  </node>
  <node id="130531" label="RBBP5" cy:nodeId="105967">
    <graphics y="870.6699089994274" z="0.0" x="-229.2356490395298"/>
  </node>
  <node id="130726" label="PIGV" cy:nodeId="111090">
    <graphics y="306.4701714505993" z="0.0" x="-440.2385634682407"/>
  </node>
  <node id="130760" label="CHST14" cy:nodeId="108018">
    <graphics y="-561.6682257661976" z="0.0" x="-542.2411574623814"/>
  </node>
  <node id="130524" label="RCOR1" cy:nodeId="105969">
    <graphics y="1080.1632561673962" z="0.0" x="-226.8181685707798"/>
  </node>
  <node id="130519" label="RFX5" cy:nodeId="105972">
    <graphics y="73.46000051401484" z="0.0" x="-314.3170699379673"/>
  </node>
  <node id="130436" label="PIGB" cy:nodeId="108020">
    <graphics y="1402.1970696439587" z="0.0" x="-35.35046379783057"/>
  </node>
  <node id="130522" label="RFX1" cy:nodeId="105971">
    <graphics y="-517.2447028169788" z="0.0" x="30.99127967140771"/>
  </node>
  <node id="130518" label="RFX7" cy:nodeId="105974">
    <graphics y="390.40672540567743" z="0.0" x="-450.730567862772"/>
  </node>
  <node id="130535" label="PRDM4" cy:nodeId="108021">
    <graphics y="145.12053155802118" z="0.0" x="-969.9044875405064"/>
  </node>
  <node id="130773" label="COG2" cy:nodeId="105973">
    <graphics y="879.1850457181774" z="0.0" x="-678.5495681069126"/>
  </node>
  <node id="130785" label="CAMTA2" cy:nodeId="111093">
    <graphics y="-389.6723151216663" z="0.0" x="1302.2718430259"/>
  </node>
  <node id="130523" label="RELA" cy:nodeId="108024">
    <graphics y="-491.6117682466663" z="0.0" x="-35.26248924949073"/>
  </node>
  <node id="130527" label="FPGT" cy:nodeId="105976">
    <graphics y="1310.5192131986462" z="0.0" x="200.05812842629052"/>
  </node>
  <node id="130517" label="RNF2" cy:nodeId="105975">
    <graphics y="900.6669182767712" z="0.0" x="5.148735115743648"/>
  </node>
  <node id="130859" label="POMT2" cy:nodeId="108023">
    <graphics y="-692.0369391451038" z="0.0" x="-465.3326491616001"/>
  </node>
  <node id="130515" label="RUNX1" cy:nodeId="105978">
    <graphics y="431.04185724161493" z="0.0" x="-355.0723037026157"/>
  </node>
  <node id="130511" label="SCML2" cy:nodeId="108025">
    <graphics y="973.8676629056774" z="0.0" x="-40.01948921897315"/>
  </node>
  <node id="130516" label="RORA" cy:nodeId="105977">
    <graphics y="-1118.8551764497913" z="0.0" x="696.6920700766811"/>
  </node>
  <node id="130676" label="GATA2" cy:nodeId="111100">
    <graphics y="67.21611547373163" z="0.0" x="-180.92357628562354"/>
  </node>
  <node id="130632" label="SULF2" cy:nodeId="105979">
    <graphics y="-741.3826422701038" z="0.0" x="879.1933518149624"/>
  </node>
  <node id="130472" label="TBP" cy:nodeId="108030">
    <graphics y="168.77642297647822" z="0.0" x="-330.4983290932407"/>
  </node>
  <node id="130483" label="STAT5B" cy:nodeId="108029">
    <graphics y="-91.97526311971319" z="0.0" x="143.12648780129052"/>
  </node>
  <node id="130507" label="SIN3A" cy:nodeId="105984">
    <graphics y="705.2109856595837" z="0.0" x="-301.91356651999854"/>
  </node>
  <node id="130790" label="B3GNT9" cy:nodeId="108032">
    <graphics y="-584.6948370943226" z="0.0" x="243.38179785988427"/>
  </node>
  <node id="130514" label="RXRA" cy:nodeId="105983">
    <graphics y="-550.8556647310413" z="0.0" x="1017.0811691977749"/>
  </node>
  <node id="130682" label="UGCG" cy:nodeId="105985">
    <graphics y="-1253.2718024263538" z="0.0" x="1052.3837815024624"/>
  </node>
  <node id="130839" label="ARSA" cy:nodeId="111105">
    <graphics y="-502.8925299654163" z="0.0" x="222.2861252524624"/>
  </node>
  <node id="130499" label="SMARCC2" cy:nodeId="105988">
    <graphics y="-63.55449438192022" z="0.0" x="-358.6071547768345"/>
  </node>
  <node id="130502" label="SMAD4" cy:nodeId="105987">
    <graphics y="775.3165154447399" z="0.0" x="-112.25336449363135"/>
  </node>
  <node id="130498" label="SMC3" cy:nodeId="105990">
    <graphics y="850.6035027494274" z="0.0" x="-286.3877486489048"/>
  </node>
  <node id="130728" label="GMPPB" cy:nodeId="108038">
    <graphics y="-675.3957037935413" z="0.0" x="-545.8420790932407"/>
  </node>
  <node id="130442" label="XBP1" cy:nodeId="108037">
    <graphics y="435.44529962442743" z="0.0" x="-818.0406569741001"/>
  </node>
  <node id="130565" label="SLC35E4" cy:nodeId="111112">
    <graphics y="-254.40656805135382" z="0.0" x="827.8369675376186"/>
  </node>
  <node id="130473" label="TBL1XR1" cy:nodeId="111114">
    <graphics y="725.7372918119274" z="0.0" x="-52.31065552451514"/>
  </node>
  <node id="130491" label="SRCAP" cy:nodeId="105994">
    <graphics y="58.088692664130804" z="0.0" x="-29.100154807352055"/>
  </node>
  <node id="130474" label="TBL1X" cy:nodeId="111113">
    <graphics y="-287.90894842244757" z="0.0" x="1110.76647193215"/>
  </node>
  <node id="130489" label="SRF" cy:nodeId="105996">
    <graphics y="-552.0037360201038" z="0.0" x="-88.04731552817725"/>
  </node>
  <node id="130454" label="TTF1" cy:nodeId="111116">
    <graphics y="382.84144830606806" z="0.0" x="-1071.5237502358189"/>
  </node>
  <node id="130675" label="B3GALNT1" cy:nodeId="111115">
    <graphics y="480.0201897611462" z="0.0" x="-169.5407790444126"/>
  </node>
  <node id="130490" label="SREBF2" cy:nodeId="105995">
    <graphics y="-305.0869879732288" z="0.0" x="431.1411972739468"/>
  </node>
  <node id="130909" label="GANAB" cy:nodeId="105998">
    <graphics y="-191.01687383748663" z="0.0" x="-379.17230980613135"/>
  </node>
  <node id="130487" label="SSRP1" cy:nodeId="105997">
    <graphics y="125.94925928018915" z="0.0" x="-712.7431105873814"/>
  </node>
  <node id="130716" label="HPSE" cy:nodeId="106000">
    <graphics y="-455.2373785982288" z="0.0" x="1186.691520760275"/>
  </node>
  <node id="130485" label="STAT2" cy:nodeId="106001">
    <graphics y="-809.4166998872913" z="0.0" x="1110.7054367759"/>
  </node>
  <node id="130481" label="SUMO2" cy:nodeId="106004">
    <graphics y="1038.53526544474" z="0.0" x="-751.9157180092564"/>
  </node>
  <node id="130484" label="STAT5A" cy:nodeId="106003">
    <graphics y="-137.44292974568975" z="0.0" x="15.654441902853023"/>
  </node>
  <node id="130479" label="TAF1" cy:nodeId="106006">
    <graphics y="650.2158074369274" z="0.0" x="-69.491052230381"/>
  </node>
  <node id="130804" label="COG1" cy:nodeId="106005">
    <graphics y="-139.9918646822132" z="0.0" x="-179.8391646645298"/>
  </node>
  <node id="130469" label="TCF7" cy:nodeId="106008">
    <graphics y="-1434.9175543794788" z="0.0" x="550.5955124594936"/>
  </node>
  <node id="130470" label="TCF12" cy:nodeId="106007">
    <graphics y="653.6423211088024" z="0.0" x="-243.79955284812354"/>
  </node>
  <node id="130468" label="TCF7L2" cy:nodeId="106010">
    <graphics y="-203.72825384236944" z="0.0" x="1179.5612717368374"/>
  </node>
  <node id="130779" label="ALG5" cy:nodeId="106012">
    <graphics y="808.1237664213024" z="0.0" x="-927.1963576576939"/>
  </node>
  <node id="130467" label="TDRD3" cy:nodeId="106011">
    <graphics y="1030.2826409330212" z="0.0" x="81.69150550148584"/>
  </node>
  <node id="130627" label="GALNT1" cy:nodeId="106014">
    <graphics y="1657.6199212064587" z="0.0" x="-209.00710289695166"/>
  </node>
  <node id="130464" label="TET2" cy:nodeId="106016">
    <graphics y="629.1623406400524" z="0.0" x="676.9112473227749"/>
  </node>
  <node id="130466" label="TERF1" cy:nodeId="106015">
    <graphics y="953.7445549955212" z="0.0" x="-337.3239516518345"/>
  </node>
  <node id="130456" label="TRIM28" cy:nodeId="106018">
    <graphics y="-416.7303900728382" z="0.0" x="-217.3551100991001"/>
  </node>
  <node id="130450" label="UBTF" cy:nodeId="106020">
    <graphics y="-0.5286002168811592" z="0.0" x="-92.54524605491065"/>
  </node>
  <node id="130453" label="TTF2" cy:nodeId="106019">
    <graphics y="884.0885491361462" z="0.0" x="-453.6012343666782"/>
  </node>
  <node id="130448" label="USF1" cy:nodeId="106021">
    <graphics y="-533.5610480318226" z="0.0" x="753.6024094321499"/>
  </node>
  <node id="130444" label="WDR5" cy:nodeId="106024">
    <graphics y="-567.7221808443226" z="0.0" x="-414.13910668113135"/>
  </node>
  <node id="130445" label="VEZF1" cy:nodeId="106023">
    <graphics y="817.3329949369274" z="0.0" x="-70.37220900275611"/>
  </node>
  <node id="130441" label="XRN2" cy:nodeId="106025">
    <graphics y="1023.4985833158337" z="0.0" x="-98.9604739449253"/>
  </node>
  <node id="130440" label="YY1" cy:nodeId="106028">
    <graphics y="897.9959588041149" z="0.0" x="-184.1054000160923"/>
  </node>
  <node id="130900" label="B3GALT4" cy:nodeId="106030">
    <graphics y="-576.6976447115101" z="0.0" x="862.2437058188686"/>
  </node>
  <node id="130438" label="ZBTB17" cy:nodeId="106029">
    <graphics y="-441.70042181111944" z="0.0" x="-255.97574608542823"/>
  </node>
  <node id="130437" label="ZBTB33" cy:nodeId="106031">
    <graphics y="972.0794548978649" z="0.0" x="-139.07663719870948"/>
  </node>
  <node id="130910" label="ALKBH3" cy:nodeId="113210">
    <graphics y="-41.02297735311163" z="0.0" x="3.852928230978023"/>
  </node>
  <node id="130775" label="PIGP" cy:nodeId="113212">
    <graphics y="876.2899651517712" z="0.0" x="-839.8097609780064"/>
  </node>
  <node id="130892" label="ARNT" cy:nodeId="113211">
    <graphics y="1757.6199212064587" z="0.0" x="-2000.4375075600376"/>
  </node>
  <node id="130705" label="PPBP" cy:nodeId="113214">
    <graphics y="-1628.9735846529163" z="0.0" x="784.5230026938686"/>
  </node>
  <node id="130708" label="EOMES" cy:nodeId="113213">
    <graphics y="-1352.3896002779163" z="0.0" x="709.3400192954311"/>
  </node>
  <node id="130693" label="B3GAT1" cy:nodeId="113216">
    <graphics y="-1514.2671637544788" z="0.0" x="435.3475266196499"/>
  </node>
  <node id="130702" label="GALNT14" cy:nodeId="113215">
    <graphics y="382.1358208646618" z="0.0" x="299.28435523293115"/>
  </node>
  <node id="130680" label="FOXP1" cy:nodeId="113218">
    <graphics y="954.5269646634899" z="0.0" x="163.28629309914209"/>
  </node>
  <node id="130687" label="NEU4" cy:nodeId="113217">
    <graphics y="-1286.5351080904163" z="0.0" x="-498.58295433738135"/>
  </node>
  <node id="130652" label="HYAL3" cy:nodeId="113220">
    <graphics y="-655.9268927583851" z="0.0" x="-714.4248122475376"/>
  </node>
  <node id="130672" label="GMDS" cy:nodeId="113219">
    <graphics y="44.68850183390009" z="0.0" x="-467.0469130776157"/>
  </node>
  <node id="130644" label="HOXA9" cy:nodeId="113222">
    <graphics y="-914.5074591646351" z="0.0" x="-1521.7070388100376"/>
  </node>
  <node id="130645" label="CHST4" cy:nodeId="113221">
    <graphics y="-385.23167181111944" z="0.0" x="-1847.203498770975"/>
  </node>
  <node id="130640" label="ING5" cy:nodeId="113224">
    <graphics y="292.869997500404" z="0.0" x="-343.29218285300635"/>
  </node>
  <node id="130641" label="ING2" cy:nodeId="113223">
    <graphics y="1434.7439446439587" z="0.0" x="-926.3313063881626"/>
  </node>
  <node id="130605" label="KLF1" cy:nodeId="113226">
    <graphics y="-450.29420232869757" z="0.0" x="299.364891121603"/>
  </node>
  <node id="130622" label="FUT5" cy:nodeId="113225">
    <graphics y="-1150.4937262544788" z="0.0" x="-389.73346703269385"/>
  </node>
  <node id="130576" label="MYB" cy:nodeId="113228">
    <graphics y="630.2256340970837" z="0.0" x="-455.975685050272"/>
  </node>
  <node id="130598" label="LEO1" cy:nodeId="113227">
    <graphics y="1066.30919122599" z="0.0" x="-655.1239089272251"/>
  </node>
  <node id="130551" label="PAX5" cy:nodeId="113230">
    <graphics y="-1216.4849371919788" z="0.0" x="629.3232956626186"/>
  </node>
  <node id="130564" label="NFE2" cy:nodeId="113229">
    <graphics y="-131.03257513143194" z="0.0" x="-352.0127028725376"/>
  </node>
  <node id="130548" label="PCGF6" cy:nodeId="113232">
    <graphics y="1171.5989251127087" z="0.0" x="-609.6101149819126"/>
  </node>
  <node id="130550" label="PBX3" cy:nodeId="113231">
    <graphics y="-328.87098455526007" z="0.0" x="-1570.594123770975"/>
  </node>
  <node id="130462" label="TFAM" cy:nodeId="113234">
    <graphics y="1104.8174309720837" z="0.0" x="-1383.7238845131626"/>
  </node>
  <node id="130526" label="RBPJ" cy:nodeId="113233">
    <graphics y="923.1923089017712" z="0.0" x="1174.52721411965"/>
  </node>
  <node id="130447" label="USP49" cy:nodeId="113235">
    <graphics y="151.2370400419079" z="0.0" x="130.60315711281396"/>
  </node>
  <node id="130890" label="ARNTL" cy:nodeId="112214">
    <graphics y="-636.6398444185413" z="0.0" x="1001.1618576743374"/>
  </node>
  <node id="130646" label="HOXA2" cy:nodeId="112222">
    <graphics y="-414.54429388143194" z="0.0" x="-2000.4375075600376"/>
  </node>
  <node id="130603" label="L3MBTL2" cy:nodeId="112224">
    <graphics y="-366.5301032076038" z="0.0" x="-674.6574782631626"/>
  </node>
  <node id="130670" label="B3GNT3" cy:nodeId="112223">
    <graphics y="-1155.2654547701038" z="0.0" x="364.3254318930874"/>
  </node>
  <node id="130901" label="B4GALT1" cy:nodeId="107274">
    <graphics y="-582.5483527193226" z="0.0" x="1106.313102791525"/>
  </node>
  <node id="130888" label="ASH2L" cy:nodeId="107273">
    <graphics y="555.7966485013806" z="0.0" x="-594.1486892006626"/>
  </node>
  <node id="130796" label="BRD2" cy:nodeId="107276">
    <graphics y="-378.58631658651007" z="0.0" x="-347.68915550925635"/>
  </node>
  <node id="130826" label="BCL6" cy:nodeId="107275">
    <graphics y="-481.05555486776007" z="0.0" x="1084.796012947775"/>
  </node>
  <node id="130874" label="FUT10" cy:nodeId="107278">
    <graphics y="398.8955864896618" z="0.0" x="-293.00336449363135"/>
  </node>
  <node id="130793" label="BRD3" cy:nodeId="107277">
    <graphics y="1069.097033022865" z="0.0" x="-917.2005080483189"/>
  </node>
  <node id="130727" label="E2F3" cy:nodeId="107284">
    <graphics y="832.6947503080212" z="0.0" x="-199.82186119773291"/>
  </node>
  <node id="130885" label="ALG8" cy:nodeId="107286">
    <graphics y="644.2112298002087" z="0.0" x="-617.9425734780064"/>
  </node>
  <node id="130718" label="EED" cy:nodeId="107285">
    <graphics y="661.1342644681774" z="0.0" x="-344.353858878397"/>
  </node>
  <node id="130673" label="FUT6" cy:nodeId="107288">
    <graphics y="-54.371945858971" z="0.0" x="-473.7591933510532"/>
  </node>
  <node id="130703" label="FUT2" cy:nodeId="107287">
    <graphics y="173.78280877970087" z="0.0" x="-134.68742363669776"/>
  </node>
  <node id="130846" label="ASAH1" cy:nodeId="107290">
    <graphics y="17.490423678382513" z="0.0" x="932.3302536704311"/>
  </node>
  <node id="130701" label="ERCC3" cy:nodeId="107292">
    <graphics y="292.1990685453259" z="0.0" x="74.81679541847802"/>
  </node>
  <node id="130688" label="FOSL1" cy:nodeId="107294">
    <graphics y="-1489.5072760591663" z="0.0" x="-599.7663039467564"/>
  </node>
  <node id="130889" label="HK1" cy:nodeId="107293">
    <graphics y="-660.8481574068226" z="0.0" x="1232.6445236899624"/>
  </node>
  <node id="130823" label="GCNT2" cy:nodeId="107296">
    <graphics y="-368.92686224080694" z="0.0" x="1151.38561255715"/>
  </node>
  <node id="130686" label="FOSL2" cy:nodeId="107295">
    <graphics y="-612.4694952974476" z="0.0" x="939.4247971274624"/>
  </node>
  <node id="130811" label="GNE" cy:nodeId="107297">
    <graphics y="793.7166619291149" z="0.0" x="-404.660987784647"/>
  </node>
  <node id="130872" label="ALG11" cy:nodeId="107300">
    <graphics y="374.20311212442743" z="0.0" x="-202.16913597800635"/>
  </node>
  <node id="130894" label="EXTL3" cy:nodeId="107299">
    <graphics y="-346.20103216268194" z="0.0" x="798.2175217368374"/>
  </node>
  <node id="130660" label="GTF3C2" cy:nodeId="107302">
    <graphics y="-222.96201849080694" z="0.0" x="-639.5537795326939"/>
  </node>
  <node id="130654" label="HDAC3" cy:nodeId="107304">
    <graphics y="-840.4068121919788" z="0.0" x="796.0397263266811"/>
  </node>
  <node id="130657" label="HDAC1" cy:nodeId="107303">
    <graphics y="2.9009766568981377" z="0.0" x="-767.1936721108189"/>
  </node>
  <node id="130579" label="GALNT2" cy:nodeId="107306">
    <graphics y="-54.87790441609991" z="0.0" x="-686.0036086342564"/>
  </node>
  <node id="130681" label="GNPDA1" cy:nodeId="107305">
    <graphics y="-1000.0320563326038" z="0.0" x="1069.574333260275"/>
  </node>
  <node id="130615" label="EXT2" cy:nodeId="107307">
    <graphics y="217.2304711332165" z="0.0" x="-233.5644606850376"/>
  </node>
  <node id="130821" label="NAAA" cy:nodeId="107310">
    <graphics y="-639.7115607271351" z="0.0" x="1068.793083260275"/>
  </node>
  <node id="130897" label="GBA" cy:nodeId="107309">
    <graphics y="-660.1764044771351" z="0.0" x="846.0814133383999"/>
  </node>
  <node id="130621" label="KAT2B" cy:nodeId="107312">
    <graphics y="200.87237787149775" z="0.0" x="1198.5004807212124"/>
  </node>
  <node id="130628" label="JARID2" cy:nodeId="107311">
    <graphics y="1560.1365227689587" z="0.0" x="-295.33226769187354"/>
  </node>
  <node id="130608" label="KDM5C" cy:nodeId="107314">
    <graphics y="-227.07270574666632" z="0.0" x="-328.6481093666782"/>
  </node>
  <node id="130618" label="KDM2B" cy:nodeId="107313">
    <graphics y="-145.14033269979132" z="0.0" x="-565.4050978920689"/>
  </node>
  <node id="130607" label="KDM6B" cy:nodeId="107315">
    <graphics y="-369.8574957857288" z="0.0" x="92.07987220070459"/>
  </node>
  <node id="130604" label="KLF4" cy:nodeId="107317">
    <graphics y="-541.6671881685413" z="0.0" x="1061.7719650962124"/>
  </node>
  <node id="130602" label="LDB1" cy:nodeId="107320">
    <graphics y="-309.20725774861944" z="0.0" x="47.096168587423335"/>
  </node>
  <node id="130589" label="MBD2" cy:nodeId="107322">
    <graphics y="-539.6811041841663" z="0.0" x="1138.163688729025"/>
  </node>
  <node id="130597" label="LIN9" cy:nodeId="107321">
    <graphics y="838.2662224759899" z="0.0" x="267.18083960793115"/>
  </node>
  <node id="130587" label="MED12" cy:nodeId="107324">
    <graphics y="-67.66541814901007" z="0.0" x="-146.55366509177588"/>
  </node>
  <node id="130569" label="NCOR2" cy:nodeId="107326">
    <graphics y="-385.45176458455694" z="0.0" x="571.3543625571499"/>
  </node>
  <node id="130582" label="MEF2D" cy:nodeId="107325">
    <graphics y="-607.1898932466663" z="0.0" x="1481.7194748618374"/>
  </node>
  <node id="130543" label="PAPSS2" cy:nodeId="107328">
    <graphics y="1203.2693352689587" z="0.0" x="613.1285324790249"/>
  </node>
  <node id="130795" label="POFUT2" cy:nodeId="107327">
    <graphics y="-465.36842107869757" z="0.0" x="-552.3282851479282"/>
  </node>
  <node id="130561" label="NFYB" cy:nodeId="107330">
    <graphics y="749.9780144681774" z="0.0" x="-504.1955336830845"/>
  </node>
  <node id="130562" label="NFYA" cy:nodeId="107329">
    <graphics y="534.1550774564587" z="0.0" x="-124.2458686135044"/>
  </node>
  <node id="130774" label="PIGY" cy:nodeId="107332">
    <graphics y="939.5803704252087" z="0.0" x="-747.1933058998814"/>
  </node>
  <node id="130830" label="B4GALT6" cy:nodeId="107331">
    <graphics y="315.1110100736462" z="0.0" x="-1.049713065408696"/>
  </node>
  <node id="130546" label="PHF8" cy:nodeId="107334">
    <graphics y="-6.6214118013538155" z="0.0" x="-225.86478417136573"/>
  </node>
  <node id="130541" label="PML" cy:nodeId="107336">
    <graphics y="-283.19813299276007" z="0.0" x="-241.79601280906104"/>
  </node>
  <node id="130853" label="SLC35A2" cy:nodeId="107335">
    <graphics y="-679.6290411958851" z="0.0" x="-394.6152419350376"/>
  </node>
  <node id="130513" label="RYBP" cy:nodeId="107338">
    <graphics y="1409.4847893705212" z="0.0" x="-161.38337700583838"/>
  </node>
  <node id="130744" label="MPI" cy:nodeId="107340">
    <graphics y="-43.7492651949085" z="0.0" x="-301.61127464988135"/>
  </node>
  <node id="130510" label="SETDB1" cy:nodeId="107339">
    <graphics y="183.5029091825329" z="0.0" x="-52.76232712485694"/>
  </node>
  <node id="130503" label="SMAD3" cy:nodeId="107342">
    <graphics y="-231.19007635213507" z="0.0" x="922.2383347251186"/>
  </node>
  <node id="130506" label="SMAD1" cy:nodeId="107341">
    <graphics y="106.73618173502314" z="0.0" x="240.64870459816552"/>
  </node>
  <node id="130500" label="SMARCC1" cy:nodeId="107344">
    <graphics y="754.8085198392712" z="0.0" x="-295.08649437644385"/>
  </node>
  <node id="130501" label="SMARCA4" cy:nodeId="107343">
    <graphics y="-326.5939154634632" z="0.0" x="-366.4240798256626"/>
  </node>
  <node id="130494" label="SP2" cy:nodeId="107346">
    <graphics y="-425.2863287935413" z="0.0" x="-48.71169655539893"/>
  </node>
  <node id="130482" label="STAT6" cy:nodeId="107348">
    <graphics y="-605.7989630708851" z="0.0" x="733.1711350180874"/>
  </node>
  <node id="130710" label="LAMP2" cy:nodeId="107350">
    <graphics y="1405.7584710111462" z="0.0" x="-284.6347731850376"/>
  </node>
  <node id="130446" label="VDR" cy:nodeId="107356">
    <graphics y="-600.5249152193226" z="0.0" x="1039.8040695884"/>
  </node>
</graph>
