# Supplementary material for: A systems-based framework to computationally describe putative transcription factors and signaling pathways regulating glycan biosynthesis
Source: publisher site journal article supplement (doi:10.3762/bjoc.17.119), 2021-07-22
Supplement: Additional file 2 [file 1860-5397-17-119-S2.cys › CytoscapeSession-2021_03_21-12_01/views/114920-145915-LGG.xgmml]

<?xml version="1.0" encoding="UTF-8" standalone="yes"?>
<graph id="145915" label="LGG" cy:view="1" cy:networkId="114920" cy:visualStyle="default" cy:rendererId="org.cytoscape.ding" cy:documentVersion="3.0" xmlns:dc="http://purl.org/dc/elements/1.1/" xmlns:xlink="http://www.w3.org/1999/xlink" xmlns:rdf="http://www.w3.org/1999/02/22-rdf-syntax-ns#" xmlns:cy="http://www.cytoscape.org" xmlns="http://www.cs.rpi.edu/XGMML">
  <graphics>
    <att name="NETWORK_NODE_SELECTION" value="true" type="string" cy:type="String"/>
    <att name="NETWORK_CENTER_X_LOCATION" value="-216.83856201171875" type="string" cy:type="String"/>
    <att name="NETWORK_HEIGHT" value="510.0" type="string" cy:type="String"/>
    <att name="NETWORK_TITLE" value="LGG" type="string" cy:type="String"/>
    <att name="NETWORK_EDGE_SELECTION" value="true" type="string" cy:type="String"/>
    <att name="NETWORK_CENTER_Y_LOCATION" value="170.85113525390625" type="string" cy:type="String"/>
    <att name="NETWORK_WIDTH" value="1312.0" type="string" cy:type="String"/>
    <att name="NETWORK_DEPTH" value="0.0" type="string" cy:type="String"/>
    <att name="NETWORK_SCALE_FACTOR" value="0.18888985616804935" type="string" cy:type="String"/>
    <att name="NETWORK_ANNOTATION_SELECTION" value="false" type="string" cy:type="String"/>
    <att name="NETWORK_CENTER_Z_LOCATION" value="0.0" type="string" cy:type="String"/>
  </graphics>
  <node id="146336" label="ATF4" cy:nodeId="108550">
    <graphics y="-1008.3585364506796" z="0.0" x="72.03399570538431"/>
  </node>
  <node id="146348" label="ASCL1" cy:nodeId="108549">
    <graphics y="-78.97953864794522" z="0.0" x="414.8661642844859"/>
  </node>
  <node id="146319" label="GCNT1" cy:nodeId="108552">
    <graphics y="-129.34414741259366" z="0.0" x="-1036.0954140846547"/>
  </node>
  <node id="146352" label="UGDH" cy:nodeId="108551">
    <graphics y="58.80211570996494" z="0.0" x="517.967757302064"/>
  </node>
  <node id="146281" label="ALG9" cy:nodeId="108554">
    <graphics y="-90.74548408251553" z="0.0" x="584.3382407005015"/>
  </node>
  <node id="146331" label="BACH2" cy:nodeId="108553">
    <graphics y="115.95973947781772" z="0.0" x="778.6114950950328"/>
  </node>
  <node id="146178" label="PMM2" cy:nodeId="108556">
    <graphics y="-256.1483313725546" z="0.0" x="620.7909384544078"/>
  </node>
  <node id="146134" label="DDOST" cy:nodeId="108555">
    <graphics y="-298.79853889208584" z="0.0" x="-223.567643088561"/>
  </node>
  <node id="146253" label="PIGC" cy:nodeId="108558">
    <graphics y="-563.5387122319296" z="0.0" x="832.1169882590953"/>
  </node>
  <node id="146254" label="PIGF" cy:nodeId="108557">
    <graphics y="-494.9444739506796" z="0.0" x="953.8683310325328"/>
  </node>
  <node id="146196" label="GAA" cy:nodeId="108560">
    <graphics y="-637.7945716069296" z="0.0" x="-16.362923545103968"/>
  </node>
  <node id="146201" label="GALE" cy:nodeId="108559">
    <graphics y="-496.12776252489834" z="0.0" x="-161.57215206072897"/>
  </node>
  <node id="146045" label="GALNT6" cy:nodeId="108561">
    <graphics y="1209.779280932133" z="0.0" x="-702.667008322936"/>
  </node>
  <node id="146215" label="CEBPZ" cy:nodeId="108564">
    <graphics y="692.4847863032267" z="0.0" x="818.629378395814"/>
  </node>
  <node id="146245" label="B3GNT4" cy:nodeId="108566">
    <graphics y="-287.1527564213827" z="0.0" x="-1699.0526894752797"/>
  </node>
  <node id="146209" label="CHD5" cy:nodeId="108565">
    <graphics y="-360.45796272021084" z="0.0" x="-1932.9077920143422"/>
  </node>
  <node id="146189" label="CSNK2A1" cy:nodeId="108568">
    <graphics y="254.5547173335001" z="0.0" x="823.916487770814"/>
  </node>
  <node id="146112" label="NAGA" cy:nodeId="108567">
    <graphics y="431.64408806103916" z="0.0" x="-359.82038967059225"/>
  </node>
  <node id="146181" label="DOT1L" cy:nodeId="108570">
    <graphics y="-803.7626502202108" z="0.0" x="1201.9897909934703"/>
  </node>
  <node id="146184" label="DAXX" cy:nodeId="108569">
    <graphics y="-565.6284949467733" z="0.0" x="686.8249960715953"/>
  </node>
  <node id="146163" label="SLC35B2" cy:nodeId="108572">
    <graphics y="-349.82051154833584" z="0.0" x="607.4161825950328"/>
  </node>
  <node id="146194" label="GUSB" cy:nodeId="108574">
    <graphics y="-674.2223059819296" z="0.0" x="66.08911045147806"/>
  </node>
  <node id="146274" label="PIGL" cy:nodeId="108578">
    <graphics y="-228.86717292528897" z="0.0" x="503.637679177064"/>
  </node>
  <node id="146168" label="ST3GAL1" cy:nodeId="108579">
    <graphics y="-186.5343177006796" z="0.0" x="-2005.6533974830922"/>
  </node>
  <node id="146157" label="EZH2" cy:nodeId="108582">
    <graphics y="-277.71138068896084" z="0.0" x="491.85868747784525"/>
  </node>
  <node id="146244" label="UGP2" cy:nodeId="108584">
    <graphics y="-102.09390327196866" z="0.0" x="-1201.1496133034047"/>
  </node>
  <node id="145988" label="SLC35A4" cy:nodeId="108586">
    <graphics y="-197.36497565966397" z="0.0" x="-91.75989047930807"/>
  </node>
  <node id="146261" label="GAL3ST3" cy:nodeId="108590">
    <graphics y="-443.92707893114834" z="0.0" x="353.86613376690775"/>
  </node>
  <node id="146132" label="HDAC2" cy:nodeId="108592">
    <graphics y="-158.65641853075772" z="0.0" x="526.349104958314"/>
  </node>
  <node id="146130" label="SULT1A3" cy:nodeId="108594">
    <graphics y="-336.54841682177334" z="0.0" x="1127.4946738059703"/>
  </node>
  <node id="146131" label="HDAC6" cy:nodeId="108593">
    <graphics y="-222.7098548100546" z="0.0" x="703.276106911439"/>
  </node>
  <node id="146086" label="STS" cy:nodeId="108600">
    <graphics y="-937.1427161381796" z="0.0" x="-1452.1374062721547"/>
  </node>
  <node id="146034" label="NEUROD2" cy:nodeId="108604">
    <graphics y="-120.7776801274374" z="0.0" x="-1833.4894570534047"/>
  </node>
  <node id="146052" label="GALNT9" cy:nodeId="108605">
    <graphics y="-63.63040229540616" z="0.0" x="-1546.1829384987172"/>
  </node>
  <node id="146016" label="PCGF2" cy:nodeId="108608">
    <graphics y="-959.5877844975546" z="0.0" x="444.252913552064"/>
  </node>
  <node id="146020" label="PAX6" cy:nodeId="108607">
    <graphics y="847.3968956782267" z="0.0" x="-1176.5034951393422"/>
  </node>
  <node id="146006" label="POLR3D" cy:nodeId="108609">
    <graphics y="-171.65635749560147" z="0.0" x="684.416243630189"/>
  </node>
  <node id="146198" label="CHST5" cy:nodeId="108612">
    <graphics y="-891.0812537358358" z="0.0" x="-17.597428244811"/>
  </node>
  <node id="145979" label="SATB1" cy:nodeId="108614">
    <graphics y="618.2190697504923" z="0.0" x="489.62370212628275"/>
  </node>
  <node id="145984" label="RING1" cy:nodeId="108613">
    <graphics y="-575.2705847905233" z="0.0" x="225.2491293723765"/>
  </node>
  <node id="145977" label="SFPQ" cy:nodeId="108616">
    <graphics y="-246.32722541552334" z="0.0" x="12.410674172181189"/>
  </node>
  <node id="145967" label="SNAPC1" cy:nodeId="108618">
    <graphics y="257.16259697217197" z="0.0" x="-66.99252597735494"/>
  </node>
  <node id="145970" label="SMARCB1" cy:nodeId="108617">
    <graphics y="-506.1427161381796" z="0.0" x="449.2825766380015"/>
  </node>
  <node id="145959" label="SOX4" cy:nodeId="108620">
    <graphics y="478.4301598383829" z="0.0" x="1266.2698202903453"/>
  </node>
  <node id="145962" label="SOX11" cy:nodeId="108619">
    <graphics y="-1067.0780188725546" z="0.0" x="749.0882407005015"/>
  </node>
  <node id="145950" label="SUPT5H" cy:nodeId="108622">
    <graphics y="-477.9365393803671" z="0.0" x="-377.84394924090475"/>
  </node>
  <node id="145958" label="SOX9" cy:nodeId="108621">
    <graphics y="495.6359398676798" z="0.0" x="-1112.3966836159047"/>
  </node>
  <node id="145945" label="TAL1" cy:nodeId="108624">
    <graphics y="519.7230980708048" z="0.0" x="-567.125016135436"/>
  </node>
  <node id="145946" label="TAF7" cy:nodeId="108623">
    <graphics y="-145.16020271044522" z="0.0" x="373.52311618878275"/>
  </node>
  <node id="145934" label="THAP1" cy:nodeId="108626">
    <graphics y="-142.16008064013272" z="0.0" x="1187.9977255637828"/>
  </node>
  <node id="145928" label="TRRAP" cy:nodeId="108628">
    <graphics y="237.68340996045322" z="0.0" x="984.5958700950328"/>
  </node>
  <node id="145929" label="TP53" cy:nodeId="108627">
    <graphics y="-160.7140052006796" z="0.0" x="575.7942343528453"/>
  </node>
  <node id="146306" label="HS3ST2" cy:nodeId="109674">
    <graphics y="-461.5338294194296" z="0.0" x="-1418.5669717018422"/>
  </node>
  <node id="145993" label="GLB1" cy:nodeId="109675">
    <graphics y="604.0174706293985" z="0.0" x="3.8038931663218136"/>
  </node>
  <node id="145987" label="NAGLU" cy:nodeId="109680">
    <graphics y="-377.28840705614834" z="0.0" x="24.046256142396032"/>
  </node>
  <node id="146124" label="HEY1" cy:nodeId="109679">
    <graphics y="-486.4321448491171" z="0.0" x="756.065413552064"/>
  </node>
  <node id="146311" label="ST8SIA5" cy:nodeId="109682">
    <graphics y="-366.6142737553671" z="0.0" x="-1409.6940468971547"/>
  </node>
  <node id="146228" label="XYLT2" cy:nodeId="109684">
    <graphics y="-799.2187049077108" z="0.0" x="47.51162632061869"/>
  </node>
  <node id="146039" label="MXD1" cy:nodeId="109683">
    <graphics y="111.70821741360874" z="0.0" x="1186.2734823997203"/>
  </node>
  <node id="146212" label="PIGG" cy:nodeId="109689">
    <graphics y="813.9636071040079" z="0.0" x="585.6863241965953"/>
  </node>
  <node id="145920" label="WRNIP1" cy:nodeId="109692">
    <graphics y="-841.8109290288046" z="0.0" x="542.2036581809703"/>
  </node>
  <node id="146268" label="BTAF1" cy:nodeId="110789">
    <graphics y="26.407195360843843" z="0.0" x="234.202376442689"/>
  </node>
  <node id="146217" label="CEBPG" cy:nodeId="110791">
    <graphics y="289.4848473383829" z="0.0" x="-807.020279807311"/>
  </node>
  <node id="146138" label="GTF3C1" cy:nodeId="110795">
    <graphics y="-225.70356818896084" z="0.0" x="830.338851052064"/>
  </node>
  <node id="146070" label="MAFG" cy:nodeId="110799">
    <graphics y="-661.6143347905233" z="0.0" x="-862.484879416686"/>
  </node>
  <node id="146040" label="MNT" cy:nodeId="110801">
    <graphics y="-236.99852058153897" z="0.0" x="1296.5157919700328"/>
  </node>
  <node id="146231" label="SGSH" cy:nodeId="110804">
    <graphics y="-900.4982459233358" z="0.0" x="131.01701267315775"/>
  </node>
  <node id="146371" label="AFF4" cy:nodeId="105686">
    <graphics y="250.04461601514072" z="0.0" x="368.18315036847025"/>
  </node>
  <node id="146230" label="FUT7" cy:nodeId="105685">
    <graphics y="-788.1004187748983" z="0.0" x="-199.39251033709616"/>
  </node>
  <node id="146010" label="PIAS4" cy:nodeId="110808">
    <graphics y="-62.80493232470303" z="0.0" x="1295.3031454856578"/>
  </node>
  <node id="146369" label="STT3B" cy:nodeId="105688">
    <graphics y="319.7692253901407" z="0.0" x="513.9429770286265"/>
  </node>
  <node id="146370" label="MAN1A2" cy:nodeId="105687">
    <graphics y="392.94703605908603" z="0.0" x="446.25321872784525"/>
  </node>
  <node id="146367" label="FUT11" cy:nodeId="105690">
    <graphics y="259.43774345654697" z="0.0" x="575.8870688255015"/>
  </node>
  <node id="145999" label="PPARGC1A" cy:nodeId="110809">
    <graphics y="-506.5024573491171" z="0.0" x="-1825.4677285377797"/>
  </node>
  <node id="146368" label="NEU3" cy:nodeId="105689">
    <graphics y="185.62707451123447" z="0.0" x="389.1607504661265"/>
  </node>
  <node id="146365" label="COG5" cy:nodeId="105692">
    <graphics y="344.57568290967197" z="0.0" x="445.39347751690775"/>
  </node>
  <node id="146366" label="ACER2" cy:nodeId="105691">
    <graphics y="517.3162987543985" z="0.0" x="293.6311789329234"/>
  </node>
  <node id="145930" label="TOP1" cy:nodeId="110814">
    <graphics y="317.20768669385166" z="0.0" x="1173.2053671653453"/>
  </node>
  <node id="146046" label="MAN2A1" cy:nodeId="105694">
    <graphics y="1178.851058275883" z="0.0" x="-594.6591042702016"/>
  </node>
  <node id="145956" label="SP4" cy:nodeId="110813">
    <graphics y="411.7768090083048" z="0.0" x="1117.8623495872203"/>
  </node>
  <node id="146211" label="SLC35F5" cy:nodeId="105696">
    <graphics y="462.73622062939853" z="0.0" x="298.7074118430796"/>
  </node>
  <node id="146361" label="SLC35A3" cy:nodeId="105695">
    <graphics y="334.7387230708048" z="0.0" x="395.7705832297984"/>
  </node>
  <node id="146363" label="GALNT10" cy:nodeId="105697">
    <graphics y="568.6611779047892" z="0.0" x="212.33097751690775"/>
  </node>
  <node id="146342" label="RTF1" cy:nodeId="105700">
    <graphics y="310.3445427729532" z="0.0" x="468.3069907005015"/>
  </node>
  <node id="146349" label="ARID2" cy:nodeId="105699">
    <graphics y="517.1829674555704" z="0.0" x="1077.9554892356578"/>
  </node>
  <node id="146332" label="SLC35A5" cy:nodeId="105702">
    <graphics y="2.971518786136812" z="0.0" x="1793.3929892356578"/>
  </node>
  <node id="146338" label="ATF2" cy:nodeId="105704">
    <graphics y="403.6839135004923" z="0.0" x="328.088606911439"/>
  </node>
  <node id="145994" label="GALNT4" cy:nodeId="105703">
    <graphics y="514.0601342036173" z="0.0" x="-213.26876155779928"/>
  </node>
  <node id="146362" label="UGGT1" cy:nodeId="105705">
    <graphics y="149.78511932629795" z="0.0" x="536.5115805442515"/>
  </node>
  <node id="146310" label="HAS1" cy:nodeId="105708">
    <graphics y="-372.72374030810147" z="0.0" x="-1590.4650429909047"/>
  </node>
  <node id="146323" label="B3GNT5" cy:nodeId="105707">
    <graphics y="494.40577629346103" z="0.0" x="-857.3361367409047"/>
  </node>
  <node id="146334" label="ATF7IP" cy:nodeId="105710">
    <graphics y="816.3165734126017" z="0.0" x="453.84513767315775"/>
  </node>
  <node id="146216" label="HAS2" cy:nodeId="105709">
    <graphics y="361.0090172602579" z="0.0" x="-1081.0277871315297"/>
  </node>
  <node id="146333" label="ATRX" cy:nodeId="105712">
    <graphics y="15.702605517093843" z="0.0" x="1973.7477255637828"/>
  </node>
  <node id="146360" label="ALG10" cy:nodeId="105711">
    <graphics y="362.0571587397501" z="0.0" x="496.56950290753275"/>
  </node>
  <node id="146316" label="HS6ST3" cy:nodeId="114930">
    <graphics y="-402.94087287646084" z="0.0" x="-1469.4231728737172"/>
  </node>
  <node id="146277" label="FKTN" cy:nodeId="105713">
    <graphics y="374.08940056103916" z="0.0" x="609.871565895814"/>
  </node>
  <node id="146059" label="MAN1A1" cy:nodeId="105716">
    <graphics y="21.664084704105562" z="0.0" x="-1111.4889687721547"/>
  </node>
  <node id="146309" label="NDST3" cy:nodeId="114932">
    <graphics y="-264.9155738041952" z="0.0" x="-1248.1881875221547"/>
  </node>
  <node id="146282" label="CSGALNACT2" cy:nodeId="105715">
    <graphics y="6.994895250980562" z="0.0" x="696.5342856223765"/>
  </node>
  <node id="146312" label="HS3ST5" cy:nodeId="114931">
    <graphics y="-279.2978675053671" z="0.0" x="-1377.3473672096547"/>
  </node>
  <node id="146207" label="NDST4" cy:nodeId="114934">
    <graphics y="535.7353051020548" z="0.0" x="943.4360800559703"/>
  </node>
  <node id="146330" label="CHST11" cy:nodeId="105718">
    <graphics y="-94.30358955126553" z="0.0" x="875.0806113059703"/>
  </node>
  <node id="146307" label="SLC35F4" cy:nodeId="114933">
    <graphics y="-497.05830451708584" z="0.0" x="-1329.9696816627797"/>
  </node>
  <node id="146355" label="CHSY1" cy:nodeId="105717">
    <graphics y="487.3409264399454" z="0.0" x="220.26624973370463"/>
  </node>
  <node id="146165" label="SULT1B1" cy:nodeId="114936">
    <graphics y="-403.2487952397421" z="0.0" x="-2284.8345498268422"/>
  </node>
  <node id="146110" label="GFPT2" cy:nodeId="105719">
    <graphics y="411.67619255322666" z="0.0" x="-930.7369546119985"/>
  </node>
  <node id="146186" label="CTCF" cy:nodeId="114935">
    <graphics y="640.2245934321329" z="0.0" x="1131.7338095481578"/>
  </node>
  <node id="146143" label="GRHL3" cy:nodeId="114938">
    <graphics y="634.1758873774454" z="0.0" x="-239.6861733619985"/>
  </node>
  <node id="146234" label="DPM3" cy:nodeId="105722">
    <graphics y="-554.2593543217733" z="0.0" x="106.83740146710306"/>
  </node>
  <node id="146147" label="GLI3" cy:nodeId="114937">
    <graphics y="1050.3536827876017" z="0.0" x="444.844954567689"/>
  </node>
  <node id="146118" label="ID3" cy:nodeId="114940">
    <graphics y="1367.0467369868204" z="0.0" x="-1413.9966592018422"/>
  </node>
  <node id="146226" label="MGAT1" cy:nodeId="105724">
    <graphics y="640.0784142329142" z="0.0" x="-704.8707436744985"/>
  </node>
  <node id="146128" label="HDAC8" cy:nodeId="114939">
    <graphics y="-569.4544837163046" z="0.0" x="423.95243747784525"/>
  </node>
  <node id="146325" label="BATF3" cy:nodeId="105723">
    <graphics y="193.68612602490634" z="0.0" x="-661.0692300026235"/>
  </node>
  <node id="146082" label="ARSF" cy:nodeId="114942">
    <graphics y="-716.1519934819296" z="0.0" x="-1541.1798867409047"/>
  </node>
  <node id="146291" label="BMI1" cy:nodeId="105726">
    <graphics y="403.1817467524454" z="0.0" x="671.2051230247203"/>
  </node>
  <node id="146089" label="LHX2" cy:nodeId="114941">
    <graphics y="-640.2656409428671" z="0.0" x="-1388.7375039284047"/>
  </node>
  <node id="146320" label="BCAT1" cy:nodeId="105725">
    <graphics y="-250.96434089403897" z="0.0" x="-1032.7126015846547"/>
  </node>
  <node id="146041" label="AGA" cy:nodeId="114944">
    <graphics y="1086.333724291508" z="0.0" x="-748.003434104186"/>
  </node>
  <node id="146077" label="LMTK3" cy:nodeId="114943">
    <graphics y="-665.5312049077108" z="0.0" x="-1712.7652138893422"/>
  </node>
  <node id="146358" label="ALG10B" cy:nodeId="105727">
    <graphics y="273.3181755854532" z="0.0" x="503.975569802064"/>
  </node>
  <node id="146025" label="NR1D1" cy:nodeId="114946">
    <graphics y="-76.17874213915616" z="0.0" x="-1984.0816201393422"/>
  </node>
  <node id="146327" label="PIGN" cy:nodeId="105730">
    <graphics y="348.56857231396884" z="0.0" x="561.9529867942515"/>
  </node>
  <node id="146028" label="NKX2-2" cy:nodeId="114945">
    <graphics y="-618.5808875248983" z="0.0" x="584.9737997825328"/>
  </node>
  <node id="146252" label="PIGW" cy:nodeId="105729">
    <graphics y="-85.54522773485928" z="0.0" x="766.0704184348765"/>
  </node>
  <node id="146003" label="POLR3GL" cy:nodeId="114948">
    <graphics y="-854.6189734623983" z="0.0" x="749.449690895814"/>
  </node>
  <node id="146162" label="SLC35E3" cy:nodeId="105732">
    <graphics y="-8.601486890132719" z="0.0" x="1148.2281943137828"/>
  </node>
  <node id="146004" label="GALNT13" cy:nodeId="114947">
    <graphics y="-456.84224006396084" z="0.0" x="1300.5872031028453"/>
  </node>
  <node id="146339" label="FAM20B" cy:nodeId="105731">
    <graphics y="148.6358654810831" z="0.0" x="-221.74924556658834"/>
  </node>
  <node id="145960" label="SOX3" cy:nodeId="114950">
    <graphics y="-921.5255286381796" z="0.0" x="-160.16011135027975"/>
  </node>
  <node id="145983" label="ALG12" cy:nodeId="105734">
    <graphics y="-1023.5455481694296" z="0.0" x="227.146224098939"/>
  </node>
  <node id="145981" label="SAP30" cy:nodeId="114949">
    <graphics y="1467.0467369868204" z="0.0" x="-2407.4248818580922"/>
  </node>
  <node id="146289" label="BRD1" cy:nodeId="105733">
    <graphics y="-214.7348792241171" z="0.0" x="432.24870212628275"/>
  </node>
  <node id="145941" label="CTNS" cy:nodeId="114952">
    <graphics y="-672.4515540288046" z="0.0" x="-304.8516091530141"/>
  </node>
  <node id="146267" label="C17orf49" cy:nodeId="105736">
    <graphics y="-742.6515662358358" z="0.0" x="474.92533786847025"/>
  </node>
  <node id="145953" label="SREBF1" cy:nodeId="114951">
    <graphics y="1041.3594200922892" z="0.0" x="-1044.479020041686"/>
  </node>
  <node id="146260" label="CASP8AP2" cy:nodeId="105738">
    <graphics y="682.0674279047892" z="0.0" x="557.3268271262828"/>
  </node>
  <node id="145931" label="TLE3" cy:nodeId="114953">
    <graphics y="-1133.8822180913046" z="0.0" x="176.31257541729838"/>
  </node>
  <node id="146259" label="CBFB" cy:nodeId="105739">
    <graphics y="151.40907409924716" z="0.0" x="852.5513144309703"/>
  </node>
  <node id="146314" label="CMAS" cy:nodeId="105742">
    <graphics y="-186.14387580614834" z="0.0" x="-1299.0701455299672"/>
  </node>
  <node id="146258" label="CBX3" cy:nodeId="105741">
    <graphics y="-281.6369788334921" z="0.0" x="742.5608969505015"/>
  </node>
  <node id="146335" label="RFNG" cy:nodeId="105744">
    <graphics y="-570.3026892827108" z="0.0" x="164.98432834698588"/>
  </node>
  <node id="146249" label="CBX4" cy:nodeId="105743">
    <graphics y="-353.9882056401327" z="0.0" x="246.982894020814"/>
  </node>
  <node id="146247" label="ST6GALNAC6" cy:nodeId="105746">
    <graphics y="-173.13694831591397" z="0.0" x="-1660.4637002174672"/>
  </node>
  <node id="146248" label="CBX7" cy:nodeId="105745">
    <graphics y="-317.2596594975546" z="0.0" x="-1528.2710732643422"/>
  </node>
  <node id="145964" label="MAN2A2" cy:nodeId="105748">
    <graphics y="1219.8465416743204" z="0.0" x="-1834.4193886940297"/>
  </node>
  <node id="146299" label="ST3GAL3" cy:nodeId="105747">
    <graphics y="-529.0378577397421" z="0.0" x="-646.4584511940297"/>
  </node>
  <node id="146084" label="MGAT3" cy:nodeId="105750">
    <graphics y="-775.9249427006796" z="0.0" x="-1406.3199013893422"/>
  </node>
  <node id="146284" label="IDUA" cy:nodeId="105749">
    <graphics y="-449.5142981694296" z="0.0" x="223.0066977317515"/>
  </node>
  <node id="146243" label="CBX8" cy:nodeId="105752">
    <graphics y="-101.01326057177334" z="0.0" x="485.31645114972025"/>
  </node>
  <node id="146266" label="B3GAT3" cy:nodeId="105754">
    <graphics y="-792.5678870366171" z="0.0" x="253.06568821026713"/>
  </node>
  <node id="146229" label="GALK1" cy:nodeId="105753">
    <graphics y="-668.1199500248983" z="0.0" x="185.209212380189"/>
  </node>
  <node id="146240" label="CDK8" cy:nodeId="105756">
    <graphics y="70.5506890131876" z="0.0" x="723.7840414817515"/>
  </node>
  <node id="146241" label="CCDC101" cy:nodeId="105755">
    <graphics y="-813.5681311772421" z="0.0" x="859.916487770814"/>
  </node>
  <node id="146237" label="DPM2" cy:nodeId="105758">
    <graphics y="-625.1061560795858" z="0.0" x="209.42957981182963"/>
  </node>
  <node id="146238" label="CDK9" cy:nodeId="105757">
    <graphics y="-708.1104895756796" z="0.0" x="146.49430759503275"/>
  </node>
  <node id="146235" label="MAN1B1" cy:nodeId="105760">
    <graphics y="-619.1065222905233" z="0.0" x="88.22827060772806"/>
  </node>
  <node id="146236" label="PIGQ" cy:nodeId="105759">
    <graphics y="-726.9555823491171" z="0.0" x="3.6201773460093136"/>
  </node>
  <node id="146345" label="MOGS" cy:nodeId="105762">
    <graphics y="-413.56025764208584" z="0.0" x="412.6893149192515"/>
  </node>
  <node id="146021" label="POMT1" cy:nodeId="105761">
    <graphics y="-419.51484748583584" z="0.0" x="147.0743246848765"/>
  </node>
  <node id="146227" label="CEBPA" cy:nodeId="105764">
    <graphics y="544.3278649165079" z="0.0" x="-744.2960366432485"/>
  </node>
  <node id="146187" label="CHST12" cy:nodeId="105763">
    <graphics y="-561.5840613530233" z="0.0" x="345.4729147727671"/>
  </node>
  <node id="146155" label="MFNG" cy:nodeId="105766">
    <graphics y="177.31936958569736" z="0.0" x="-466.3418435280141"/>
  </node>
  <node id="146193" label="NAGK" cy:nodeId="105765">
    <graphics y="-802.7407385991171" z="0.0" x="-68.28708164141744"/>
  </node>
  <node id="146167" label="A4GALT" cy:nodeId="105768">
    <graphics y="-229.88786384325772" z="0.0" x="-2331.0559853737172"/>
  </node>
  <node id="146213" label="CHD2" cy:nodeId="105770">
    <graphics y="243.02040794629306" z="0.0" x="467.37724216534525"/>
  </node>
  <node id="146353" label="NDST2" cy:nodeId="105772">
    <graphics y="56.40660789746494" z="0.0" x="573.8527060325328"/>
  </node>
  <node id="146287" label="OGT" cy:nodeId="105771">
    <graphics y="3.110129625980562" z="0.0" x="592.8361044700328"/>
  </node>
  <node id="146206" label="CHD8" cy:nodeId="105774">
    <graphics y="185.2777397944376" z="0.0" x="518.8994589622203"/>
  </node>
  <node id="146210" label="CHD4" cy:nodeId="105773">
    <graphics y="420.41334465283603" z="0.0" x="1008.1827841575328"/>
  </node>
  <node id="146115" label="LAMP3" cy:nodeId="105776">
    <graphics y="720.5134117915079" z="0.0" x="-870.9679116432485"/>
  </node>
  <node id="146224" label="GAL3ST4" cy:nodeId="105778">
    <graphics y="286.1247856928751" z="0.0" x="-556.8058633034047"/>
  </node>
  <node id="146114" label="MAN2B1" cy:nodeId="105777">
    <graphics y="273.5756676508829" z="0.0" x="-371.4850320045766"/>
  </node>
  <node id="146204" label="CPSF3L" cy:nodeId="105780">
    <graphics y="-605.6986243413046" z="0.0" x="-99.95550791667074"/>
  </node>
  <node id="146295" label="DSE" cy:nodeId="105779">
    <graphics y="422.52665642041416" z="0.0" x="-148.6905335609731"/>
  </node>
  <node id="146232" label="B4GALT7" cy:nodeId="105782">
    <graphics y="-714.4253089116171" z="0.0" x="378.6853781516734"/>
  </node>
  <node id="146203" label="B3GALT6" cy:nodeId="105781">
    <graphics y="-372.47175666552334" z="0.0" x="-125.3704766456899"/>
  </node>
  <node id="146286" label="B4GALNT4" cy:nodeId="105784">
    <graphics y="-522.9189612553671" z="0.0" x="197.9627524192515"/>
  </node>
  <node id="146200" label="POMGNT1" cy:nodeId="105783">
    <graphics y="-420.9200598881796" z="0.0" x="-192.3560494606313"/>
  </node>
  <node id="146191" label="CREB1" cy:nodeId="105785">
    <graphics y="491.4375756098673" z="0.0" x="853.4564047630015"/>
  </node>
  <node id="146190" label="CREBBP" cy:nodeId="105790">
    <graphics y="143.35004356641025" z="0.0" x="618.7090292747203"/>
  </node>
  <node id="146347" label="B4GALT3" cy:nodeId="105789">
    <graphics y="-329.3117835209921" z="0.0" x="461.95451267315775"/>
  </node>
  <node id="146346" label="POFUT1" cy:nodeId="105792">
    <graphics y="103.86735561627597" z="0.0" x="589.5858603294078"/>
  </node>
  <node id="146285" label="COG7" cy:nodeId="105791">
    <graphics y="-336.69953986864834" z="0.0" x="349.2447043235484"/>
  </node>
  <node id="146185" label="CTNNB1" cy:nodeId="105794">
    <graphics y="494.45597770947666" z="0.0" x="524.4070273215953"/>
  </node>
  <node id="146188" label="CTBP1" cy:nodeId="105793">
    <graphics y="-731.0069739506796" z="0.0" x="261.3884421165171"/>
  </node>
  <node id="146264" label="SLC35B1" cy:nodeId="105798">
    <graphics y="-458.44014045458584" z="0.0" x="640.9651938255015"/>
  </node>
  <node id="146263" label="ALG3" cy:nodeId="105797">
    <graphics y="-487.12678596239834" z="0.0" x="383.03568943097025"/>
  </node>
  <node id="146257" label="DPM1" cy:nodeId="105799">
    <graphics y="-593.1417395756796" z="0.0" x="1069.0675497825328"/>
  </node>
  <node id="146305" label="FUT1" cy:nodeId="105802">
    <graphics y="-230.55110236864834" z="0.0" x="-1812.2420205299672"/>
  </node>
  <node id="146177" label="E2F6" cy:nodeId="105801">
    <graphics y="-385.61326667528897" z="0.0" x="696.270491677064"/>
  </node>
  <node id="146269" label="ST3GAL2" cy:nodeId="105806">
    <graphics y="-203.84822150927334" z="0.0" x="911.315413552064"/>
  </node>
  <node id="146276" label="CHST3" cy:nodeId="105807">
    <graphics y="35.94829490918369" z="0.0" x="802.6818075950328"/>
  </node>
  <node id="146220" label="FUT4" cy:nodeId="105810">
    <graphics y="756.4373619868204" z="0.0" x="-693.3868569557485"/>
  </node>
  <node id="146060" label="PIGK" cy:nodeId="106835">
    <graphics y="-20.807221143062407" z="0.0" x="-1024.977555197936"/>
  </node>
  <node id="146219" label="ST3GAL6" cy:nodeId="105811">
    <graphics y="425.8294518305704" z="0.0" x="-800.5812539284047"/>
  </node>
  <node id="146054" label="B3GNT2" cy:nodeId="106838">
    <graphics y="58.88598564404697" z="0.0" x="-1563.6070107643422"/>
  </node>
  <node id="145932" label="ST6GALNAC4" cy:nodeId="106839">
    <graphics y="-1097.7806555913046" z="0.0" x="358.23039157940775"/>
  </node>
  <node id="146044" label="ST6GALNAC3" cy:nodeId="105815">
    <graphics y="1099.4944908930704" z="0.0" x="-1205.7386025612172"/>
  </node>
  <node id="146304" label="B3GALT1" cy:nodeId="105818">
    <graphics y="-110.2090766118124" z="0.0" x="-1372.5257119362172"/>
  </node>
  <node id="146019" label="HPSE2" cy:nodeId="105817">
    <graphics y="929.9965660883829" z="0.0" x="-1348.2339638893422"/>
  </node>
  <node id="146317" label="BCL11A" cy:nodeId="106841">
    <graphics y="-345.39024421435147" z="0.0" x="-1300.4107217018422"/>
  </node>
  <node id="146030" label="SLC35E1" cy:nodeId="106844">
    <graphics y="211.39198234814853" z="0.0" x="112.83805759503275"/>
  </node>
  <node id="146340" label="UAP1" cy:nodeId="105820">
    <graphics y="61.465037615482515" z="0.0" x="-131.37709514544576"/>
  </node>
  <node id="146270" label="BRD4" cy:nodeId="106843">
    <graphics y="-141.69526740771084" z="0.0" x="783.1410361106578"/>
  </node>
  <node id="146357" label="COG6" cy:nodeId="105824">
    <graphics y="177.9902642085001" z="0.0" x="178.8343344505015"/>
  </node>
  <node id="146288" label="COG3" cy:nodeId="105823">
    <graphics y="91.84189728039951" z="0.0" x="542.8306723411265"/>
  </node>
  <node id="146183" label="DCP1A" cy:nodeId="106850">
    <graphics y="567.2958519770548" z="0.0" x="803.741438942689"/>
  </node>
  <node id="146176" label="ELF2" cy:nodeId="105825">
    <graphics y="104.60848549145908" z="0.0" x="306.73136814190775"/>
  </node>
  <node id="146205" label="CLOCK" cy:nodeId="106849">
    <graphics y="92.75983932751865" z="0.0" x="-378.5064858619985"/>
  </node>
  <node id="146175" label="ELL" cy:nodeId="105828">
    <graphics y="-868.0515296147421" z="0.0" x="388.4010153587046"/>
  </node>
  <node id="146233" label="GALT" cy:nodeId="106851">
    <graphics y="-1134.642105786617" z="0.0" x="33.421828346985876"/>
  </node>
  <node id="146069" label="XYLT1" cy:nodeId="106854">
    <graphics y="-827.6250159428671" z="0.0" x="-929.244156760436"/>
  </node>
  <node id="146170" label="ERCC6" cy:nodeId="105830">
    <graphics y="406.00688102978916" z="0.0" x="384.7982931907359"/>
  </node>
  <node id="146056" label="MAN1C1" cy:nodeId="106853">
    <graphics y="19.27943352002353" z="0.0" x="-1443.6327676002797"/>
  </node>
  <node id="146174" label="EP400" cy:nodeId="105829">
    <graphics y="201.8938820673868" z="0.0" x="718.5791464622203"/>
  </node>
  <node id="146169" label="ERG" cy:nodeId="105832">
    <graphics y="-281.8424536870077" z="0.0" x="-2181.3443154518422"/>
  </node>
  <node id="146223" label="FUCA1" cy:nodeId="106856">
    <graphics y="647.6352989985392" z="0.0" x="-600.3111428444204"/>
  </node>
  <node id="146222" label="ST6GAL1" cy:nodeId="106855">
    <graphics y="473.0102074458048" z="0.0" x="-683.9276284401235"/>
  </node>
  <node id="146301" label="GCNT4" cy:nodeId="106858">
    <graphics y="-233.99546882372647" z="0.0" x="-1541.6122597877797"/>
  </node>
  <node id="146324" label="ST8SIA4" cy:nodeId="105834">
    <graphics y="375.5136254145548" z="0.0" x="-652.4705971901235"/>
  </node>
  <node id="146081" label="ST3GAL5" cy:nodeId="106857">
    <graphics y="-825.6390540288046" z="0.0" x="-1502.5930947487172"/>
  </node>
  <node id="146300" label="CHSY3" cy:nodeId="105833">
    <graphics y="-184.1419837163046" z="0.0" x="-1479.6138467018422"/>
  </node>
  <node id="146239" label="UST" cy:nodeId="105836">
    <graphics y="29.20392540234775" z="0.0" x="882.3308554465953"/>
  </node>
  <node id="146322" label="MGAT4A" cy:nodeId="106860">
    <graphics y="377.8573754145548" z="0.0" x="-461.4210061256704"/>
  </node>
  <node id="146043" label="GALNT7" cy:nodeId="106859">
    <graphics y="1074.760970385258" z="0.0" x="-537.1144570534047"/>
  </node>
  <node id="146151" label="FUS" cy:nodeId="106862">
    <graphics y="-779.8144080327108" z="0.0" x="636.7015219505015"/>
  </node>
  <node id="146122" label="CHST15" cy:nodeId="106861">
    <graphics y="1023.5189659907267" z="0.0" x="74.03948886944681"/>
  </node>
  <node id="146053" label="GPI" cy:nodeId="106864">
    <graphics y="-393.4016272709921" z="0.0" x="-1749.0983437721547"/>
  </node>
  <node id="146164" label="ETS1" cy:nodeId="105839">
    <graphics y="21.632735521976656" z="0.0" x="639.2004843528453"/>
  </node>
  <node id="146160" label="ETV1" cy:nodeId="105842">
    <graphics y="110.29254844922275" z="0.0" x="959.1664267356578"/>
  </node>
  <node id="146144" label="GPS2" cy:nodeId="106865">
    <graphics y="-977.8619544194296" z="0.0" x="-48.39523403094381"/>
  </node>
  <node id="146055" label="EXTL2" cy:nodeId="105844">
    <graphics y="-26.55944892626553" z="0.0" x="-1659.1936806862172"/>
  </node>
  <node id="146351" label="MGAT2" cy:nodeId="106868">
    <graphics y="44.30440452832431" z="0.0" x="478.082747536439"/>
  </node>
  <node id="146123" label="HIF1A" cy:nodeId="106867">
    <graphics y="699.3423912836954" z="0.0" x="121.91244419171244"/>
  </node>
  <node id="146172" label="ARSB" cy:nodeId="105843">
    <graphics y="390.02259758252353" z="0.0" x="823.8058310325328"/>
  </node>
  <node id="146159" label="EZH1" cy:nodeId="105846">
    <graphics y="-190.90217658739834" z="0.0" x="1046.4713583762828"/>
  </node>
  <node id="146064" label="SLC35B4" cy:nodeId="105845">
    <graphics y="414.62211540478916" z="0.0" x="223.94831760479838"/>
  </node>
  <node id="146156" label="FLI1" cy:nodeId="105848">
    <graphics y="416.19755485791416" z="0.0" x="-598.5609902565297"/>
  </node>
  <node id="146096" label="KDM4A" cy:nodeId="106874">
    <graphics y="-298.40046760302334" z="0.0" x="-455.92585842059225"/>
  </node>
  <node id="146153" label="FOS" cy:nodeId="105849">
    <graphics y="616.5098412348673" z="0.0" x="-967.1595620338735"/>
  </node>
  <node id="146072" label="MAF" cy:nodeId="106876">
    <graphics y="372.1239617182657" z="0.0" x="-737.4347695534047"/>
  </node>
  <node id="146297" label="GLCE" cy:nodeId="105851">
    <graphics y="-462.8492591069296" z="0.0" x="-1183.9893349830922"/>
  </node>
  <node id="146251" label="RPN2" cy:nodeId="105854">
    <graphics y="-49.213089673335844" z="0.0" x="284.07011325909525"/>
  </node>
  <node id="146002" label="POU2F2" cy:nodeId="106880">
    <graphics y="741.9275353266642" z="0.0" x="-272.8355111305532"/>
  </node>
  <node id="146099" label="ALG6" cy:nodeId="106879">
    <graphics y="-159.38719245653897" z="0.0" x="-386.3822488014516"/>
  </node>
  <node id="146359" label="GFPT1" cy:nodeId="106882">
    <graphics y="227.70612266797275" z="0.0" x="503.6136313255015"/>
  </node>
  <node id="146001" label="PPARA" cy:nodeId="106881">
    <graphics y="1476.3443138911173" z="0.0" x="-1908.7244042579946"/>
  </node>
  <node id="146329" label="DSEL" cy:nodeId="105857">
    <graphics y="456.6411888911173" z="0.0" x="772.0229941184703"/>
  </node>
  <node id="145996" label="RARA" cy:nodeId="106884">
    <graphics y="-402.4900061772421" z="0.0" x="515.0445395286265"/>
  </node>
  <node id="146113" label="NPL" cy:nodeId="105860">
    <graphics y="864.2303917719767" z="0.0" x="-920.1541299049672"/>
  </node>
  <node id="146018" label="SULF1" cy:nodeId="106883">
    <graphics y="697.0020592524454" z="0.0" x="-1264.1242226784047"/>
  </node>
  <node id="146074" label="HK3" cy:nodeId="105859">
    <graphics y="853.5566246821329" z="0.0" x="-541.6717995827016"/>
  </node>
  <node id="145975" label="SIRT6" cy:nodeId="106885">
    <graphics y="-665.2896887944296" z="0.0" x="243.585433083314"/>
  </node>
  <node id="146149" label="GABPA" cy:nodeId="105861">
    <graphics y="155.94359138745517" z="0.0" x="580.059554177064"/>
  </node>
  <node id="146148" label="ALG13" cy:nodeId="105864">
    <graphics y="91.9954731776163" z="0.0" x="836.0306235130015"/>
  </node>
  <node id="146050" label="EXTL1" cy:nodeId="106887">
    <graphics y="5.747962267582125" z="0.0" x="-2407.4248818580922"/>
  </node>
  <node id="145933" label="THAP11" cy:nodeId="106890">
    <graphics y="-651.1961218998983" z="0.0" x="318.8481589133921"/>
  </node>
  <node id="146145" label="GLYR1" cy:nodeId="105866">
    <graphics y="58.04309013623447" z="0.0" x="1052.0181113059703"/>
  </node>
  <node id="146280" label="COG4" cy:nodeId="106892">
    <graphics y="-469.6668860600546" z="0.0" x="501.850569802064"/>
  </node>
  <node id="146350" label="COG8" cy:nodeId="106891">
    <graphics y="70.42056587475986" z="0.0" x="627.4747153098765"/>
  </node>
  <node id="145919" label="ZBTB10" cy:nodeId="106894">
    <graphics y="587.0752404047892" z="0.0" x="575.0638266380015"/>
  </node>
  <node id="146142" label="GTF2F1" cy:nodeId="105870">
    <graphics y="-653.0403601811483" z="0.0" x="704.371565895814"/>
  </node>
  <node id="146154" label="CTBS" cy:nodeId="105869">
    <graphics y="235.57086876172275" z="0.0" x="-739.256607932311"/>
  </node>
  <node id="146214" label="STT3A" cy:nodeId="106893">
    <graphics y="212.04412773389072" z="0.0" x="550.354720192689"/>
  </node>
  <node id="146136" label="H2AFX" cy:nodeId="105872">
    <graphics y="-576.5893103764608" z="0.0" x="38.462096291321814"/>
  </node>
  <node id="146140" label="GTF2I" cy:nodeId="105871">
    <graphics y="405.94740227002353" z="0.0" x="548.002913552064"/>
  </node>
  <node id="146278" label="PIGO" cy:nodeId="105874">
    <graphics y="65.88084724683017" z="0.0" x="671.4745322044078"/>
  </node>
  <node id="146133" label="HCFC1" cy:nodeId="105873">
    <graphics y="-96.5248725102499" z="0.0" x="538.3419028098765"/>
  </node>
  <node id="146126" label="HES4" cy:nodeId="105876">
    <graphics y="-522.2193762944296" z="0.0" x="46.032424050110876"/>
  </node>
  <node id="146127" label="HECTD1" cy:nodeId="105875">
    <graphics y="295.9580681635782" z="0.0" x="9.440779763001501"/>
  </node>
  <node id="146250" label="DPAGT1" cy:nodeId="105878">
    <graphics y="-120.8213812993124" z="0.0" x="989.8308554465953"/>
  </node>
  <node id="146120" label="HINFP" cy:nodeId="105877">
    <graphics y="-574.2757727788046" z="0.0" x="524.8793173606578"/>
  </node>
  <node id="146265" label="TSTA3" cy:nodeId="105880">
    <graphics y="-765.6621253178671" z="0.0" x="324.0047140891734"/>
  </node>
  <node id="146116" label="IKZF1" cy:nodeId="105882">
    <graphics y="481.5038597895548" z="0.0" x="-625.4909218971547"/>
  </node>
  <node id="146135" label="GPAA1" cy:nodeId="105881">
    <graphics y="-782.4907996342733" z="0.0" x="176.41963108136088"/>
  </node>
  <node id="146047" label="GM2A" cy:nodeId="105883">
    <graphics y="1040.5447838618204" z="0.0" x="-653.2078408424672"/>
  </node>
  <node id="146108" label="INTS3" cy:nodeId="105886">
    <graphics y="-335.3864905522421" z="0.0" x="149.15739353253275"/>
  </node>
  <node id="146109" label="INO80" cy:nodeId="105885">
    <graphics y="586.406508715336" z="0.0" x="654.2947836692515"/>
  </node>
  <node id="146107" label="IRF8" cy:nodeId="105890">
    <graphics y="497.8980553461954" z="0.0" x="-462.4476174537954"/>
  </node>
  <node id="146105" label="JMJD1C" cy:nodeId="105892">
    <graphics y="137.70359924573154" z="0.0" x="442.38285739972025"/>
  </node>
  <node id="146104" label="JMJD6" cy:nodeId="105894">
    <graphics y="-893.0700232670858" z="0.0" x="656.8730917747203"/>
  </node>
  <node id="146139" label="MGAT5" cy:nodeId="105893">
    <graphics y="614.5450890376017" z="0.0" x="318.27885349347025"/>
  </node>
  <node id="146321" label="FKRP" cy:nodeId="105896">
    <graphics y="-320.5767066166952" z="0.0" x="-598.6436928932485"/>
  </node>
  <node id="146103" label="JUN" cy:nodeId="105895">
    <graphics y="526.4822228266642" z="0.0" x="-991.777115744811"/>
  </node>
  <node id="146111" label="GBGT1" cy:nodeId="105897">
    <graphics y="447.9374840571329" z="0.0" x="-528.9574441139516"/>
  </node>
  <node id="146101" label="KAT5" cy:nodeId="105900">
    <graphics y="-1120.777115552242" z="0.0" x="499.6353598411265"/>
  </node>
  <node id="146102" label="JUND" cy:nodeId="105899">
    <graphics y="-745.8585974858358" z="0.0" x="105.35871799542338"/>
  </node>
  <node id="146298" label="GNB1" cy:nodeId="105902">
    <graphics y="-79.1685492680624" z="0.0" x="-828.3700722877797"/>
  </node>
  <node id="146100" label="KDM1A" cy:nodeId="105901">
    <graphics y="-134.5663001225546" z="0.0" x="-163.47783748553366"/>
  </node>
  <node id="146095" label="KDM5A" cy:nodeId="105904">
    <graphics y="280.4996178461954" z="0.0" x="398.714583473939"/>
  </node>
  <node id="146097" label="KDM3A" cy:nodeId="105903">
    <graphics y="561.8465111567423" z="0.0" x="728.259505348939"/>
  </node>
  <node id="146094" label="GNS" cy:nodeId="105905">
    <graphics y="375.70121696728916" z="0.0" x="151.70893772198588"/>
  </node>
  <node id="146173" label="B3GALNT2" cy:nodeId="105908">
    <graphics y="-28.29155036669522" z="0.0" x="998.3926230247203"/>
  </node>
  <node id="146093" label="KDM5B" cy:nodeId="105907">
    <graphics y="318.86202934521884" z="0.0" x="627.0992270286265"/>
  </node>
  <node id="146073" label="HS3ST1" cy:nodeId="105910">
    <graphics y="718.6165612055704" z="0.0" x="-535.135270041686"/>
  </node>
  <node id="146079" label="LMO2" cy:nodeId="105909">
    <graphics y="1476.3443138911173" z="0.0" x="-2108.291230124694"/>
  </node>
  <node id="146075" label="RENBP" cy:nodeId="105912">
    <graphics y="847.7016442133829" z="0.0" x="-774.746842307311"/>
  </node>
  <node id="146076" label="LYL1" cy:nodeId="105911">
    <graphics y="587.6797936274454" z="0.0" x="-620.004166526061"/>
  </node>
  <node id="146071" label="MAFB" cy:nodeId="105914">
    <graphics y="752.5132286860392" z="0.0" x="-1024.549088401061"/>
  </node>
  <node id="146068" label="MAZ" cy:nodeId="105916">
    <graphics y="-607.8394324467733" z="0.0" x="283.07621677472025"/>
  </node>
  <node id="146195" label="MGAT4B" cy:nodeId="105918">
    <graphics y="-576.8615271733358" z="0.0" x="-23.57284633563131"/>
  </node>
  <node id="146199" label="B4GALT2" cy:nodeId="105917">
    <graphics y="-442.11714240771084" z="0.0" x="-108.80967704699606"/>
  </node>
  <node id="146166" label="ST6GALNAC1" cy:nodeId="105920">
    <graphics y="-335.8867346928671" z="0.0" x="-2396.7993935768422"/>
  </node>
  <node id="146318" label="IDS" cy:nodeId="105922">
    <graphics y="-322.98228522997647" z="0.0" x="-1095.9027871315297"/>
  </node>
  <node id="146065" label="MECP2" cy:nodeId="105921">
    <graphics y="291.50468376416416" z="0.0" x="191.971419411439"/>
  </node>
  <node id="146063" label="MED1" cy:nodeId="105924">
    <graphics y="420.8459313227579" z="0.0" x="907.9517660911265"/>
  </node>
  <node id="146000" label="NDST1" cy:nodeId="105923">
    <graphics y="1467.0467369868204" z="0.0" x="-2008.2912301246938"/>
  </node>
  <node id="146141" label="NEU1" cy:nodeId="107971">
    <graphics y="-958.5136878178671" z="0.0" x="931.2843466575328"/>
  </node>
  <node id="146057" label="MEF2C" cy:nodeId="105926">
    <graphics y="-198.96482917528897" z="0.0" x="-1397.6616982643422"/>
  </node>
  <node id="146061" label="MEF2A" cy:nodeId="105925">
    <graphics y="92.06645706433505" z="0.0" x="-657.985123557311"/>
  </node>
  <node id="146085" label="SLC35F1" cy:nodeId="105927">
    <graphics y="-910.1298987553671" z="0.0" x="-1585.8069619362172"/>
  </node>
  <node id="146262" label="C17orf96" cy:nodeId="107978">
    <graphics y="-216.4082190678671" z="0.0" x="88.35201938702494"/>
  </node>
  <node id="146049" label="MITF" cy:nodeId="105929">
    <graphics y="882.7967980219767" z="0.0" x="-659.925797385436"/>
  </node>
  <node id="146038" label="MYBL1" cy:nodeId="105934">
    <graphics y="-20.61399909716397" z="0.0" x="1453.5526572044078"/>
  </node>
  <node id="146042" label="LAMP1" cy:nodeId="107981">
    <graphics y="1167.2457115961954" z="0.0" x="-834.1507729713735"/>
  </node>
  <node id="146078" label="CTSA" cy:nodeId="107984">
    <graphics y="1467.0467369868204" z="0.0" x="-2207.858055991393"/>
  </node>
  <node id="146202" label="SLC35C2" cy:nodeId="107986">
    <graphics y="-670.6886145756796" z="0.0" x="-94.22459785388082"/>
  </node>
  <node id="146315" label="HS3ST4" cy:nodeId="105938">
    <graphics y="-275.5669409916952" z="0.0" x="-1457.5240029518422"/>
  </node>
  <node id="146088" label="SLC35F3" cy:nodeId="105940">
    <graphics y="-796.6554724858358" z="0.0" x="-1638.8108681862172"/>
  </node>
  <node id="146036" label="MZF1" cy:nodeId="105942">
    <graphics y="-576.2312781498983" z="0.0" x="-187.71221248553366"/>
  </node>
  <node id="146341" label="B4GALNT1" cy:nodeId="107990">
    <graphics y="180.33768394726962" z="0.0" x="11.00650699688822"/>
  </node>
  <node id="146246" label="ST6GALNAC5" cy:nodeId="107989">
    <graphics y="-461.8365637944296" z="0.0" x="-1532.6232461159047"/>
  </node>
  <node id="146328" label="HAS3" cy:nodeId="105941">
    <graphics y="-63.28134223681241" z="0.0" x="677.1885824973765"/>
  </node>
  <node id="146033" label="NFAT5" cy:nodeId="105943">
    <graphics y="742.2416832758829" z="0.0" x="318.4952536399546"/>
  </node>
  <node id="146032" label="NFIC" cy:nodeId="105945">
    <graphics y="620.2496483637735" z="0.0" x="406.0865011985484"/>
  </node>
  <node id="146026" label="NPAT" cy:nodeId="105948">
    <graphics y="336.62342766064853" z="0.0" x="960.7395468528453"/>
  </node>
  <node id="146029" label="NIPBL" cy:nodeId="105947">
    <graphics y="199.7717812373087" z="0.0" x="449.5921469505015"/>
  </node>
  <node id="145965" label="ST3GAL4" cy:nodeId="107998">
    <graphics y="1315.395491869633" z="0.0" x="-1745.8601845924672"/>
  </node>
  <node id="146292" label="SLC35D1" cy:nodeId="105950">
    <graphics y="522.5232994868204" z="0.0" x="433.635237770814"/>
  </node>
  <node id="146024" label="NR2C2" cy:nodeId="105949">
    <graphics y="269.08830192822666" z="0.0" x="313.5589133079234"/>
  </node>
  <node id="146023" label="NR2F1" cy:nodeId="105951">
    <graphics y="1305.3868248774454" z="0.0" x="-1519.6074990455922"/>
  </node>
  <node id="146067" label="NANS" cy:nodeId="108002">
    <graphics y="-910.0227210209921" z="0.0" x="270.6167136008921"/>
  </node>
  <node id="146344" label="PIGM" cy:nodeId="105954">
    <graphics y="126.53725937146396" z="0.0" x="505.14762790753275"/>
  </node>
  <node id="146017" label="PBX1" cy:nodeId="105953">
    <graphics y="438.90956047314853" z="0.0" x="464.5814047630015"/>
  </node>
  <node id="146326" label="SLC35A1" cy:nodeId="108001">
    <graphics y="-17.979523389156157" z="0.0" x="754.2076254661265"/>
  </node>
  <node id="145963" label="B3GNT7" cy:nodeId="108004">
    <graphics y="1111.249739916508" z="0.0" x="-1771.5586709205922"/>
  </node>
  <node id="146015" label="PHF20" cy:nodeId="105956">
    <graphics y="193.8852150751993" z="0.0" x="312.9488669212046"/>
  </node>
  <node id="146012" label="PIAS1" cy:nodeId="105958">
    <graphics y="473.4690697504923" z="0.0" x="379.6473227317515"/>
  </node>
  <node id="146014" label="PHF6" cy:nodeId="105957">
    <graphics y="890.4932701899454" z="0.0" x="248.78022678448588"/>
  </node>
  <node id="146008" label="POLR3A" cy:nodeId="105960">
    <graphics y="437.89173820752353" z="0.0" x="129.56466587139994"/>
  </node>
  <node id="146009" label="POLR2B" cy:nodeId="105959">
    <graphics y="228.09771660107822" z="0.0" x="416.1111899192515"/>
  </node>
  <node id="146302" label="CHST1" cy:nodeId="108010">
    <graphics y="-413.15144416552334" z="0.0" x="-1343.9610146705922"/>
  </node>
  <node id="146037" label="MYC" cy:nodeId="108009">
    <graphics y="-140.09819099169522" z="0.0" x="293.7576437766734"/>
  </node>
  <node id="145997" label="RAC3" cy:nodeId="105964">
    <graphics y="-781.5694739506796" z="0.0" x="405.54411228253275"/>
  </node>
  <node id="146283" label="UGGT2" cy:nodeId="105966">
    <graphics y="35.49391868848056" z="0.0" x="386.15824802472025"/>
  </node>
  <node id="146313" label="MGAT5B" cy:nodeId="108014">
    <graphics y="-542.7724158452108" z="0.0" x="-1489.1002968971547"/>
  </node>
  <node id="145995" label="RB1" cy:nodeId="105965">
    <graphics y="343.8321068598673" z="0.0" x="246.12129123761088"/>
  </node>
  <node id="145991" label="RBL2" cy:nodeId="105968">
    <graphics y="255.25678947705478" z="0.0" x="539.2405844505015"/>
  </node>
  <node id="146027" label="NOTCH1" cy:nodeId="108016">
    <graphics y="-118.23667976122647" z="0.0" x="711.086165505189"/>
  </node>
  <node id="145992" label="RBBP5" cy:nodeId="105967">
    <graphics y="236.2226631953165" z="0.0" x="253.379622536439"/>
  </node>
  <node id="146303" label="B4GALNT3" cy:nodeId="108015">
    <graphics y="-570.7370154545858" z="0.0" x="-1231.4179238502797"/>
  </node>
  <node id="146117" label="PIGV" cy:nodeId="111090">
    <graphics y="1192.879378588383" z="0.0" x="-1392.7849892799672"/>
  </node>
  <node id="146242" label="CHST14" cy:nodeId="108018">
    <graphics y="-441.1952063725546" z="0.0" x="571.6038046653453"/>
  </node>
  <node id="145986" label="RFX5" cy:nodeId="105972">
    <graphics y="152.7350685908243" z="0.0" x="732.4454184348765"/>
  </node>
  <node id="145985" label="RFX7" cy:nodeId="105974">
    <graphics y="-29.995514600093657" z="0.0" x="824.6609335715953"/>
  </node>
  <node id="145998" label="PRDM4" cy:nodeId="108021">
    <graphics y="514.4122765376017" z="0.0" x="140.001448708314"/>
  </node>
  <node id="145989" label="RELA" cy:nodeId="108024">
    <graphics y="-239.50529548388272" z="0.0" x="178.31190403057963"/>
  </node>
  <node id="146058" label="FPGT" cy:nodeId="105976">
    <graphics y="528.9696190668985" z="0.0" x="-358.56221095965475"/>
  </node>
  <node id="145982" label="RNF2" cy:nodeId="105975">
    <graphics y="280.4740593745157" z="0.0" x="669.4263754661265"/>
  </node>
  <node id="146180" label="POMT2" cy:nodeId="108023">
    <graphics y="-645.4132239506796" z="0.0" x="931.9938193137828"/>
  </node>
  <node id="145955" label="SRC" cy:nodeId="108028">
    <graphics y="-308.3124243901327" z="0.0" x="683.4672079856578"/>
  </node>
  <node id="146272" label="SULF2" cy:nodeId="105979">
    <graphics y="-301.1700598881796" z="0.0" x="811.4048910911265"/>
  </node>
  <node id="145944" label="TBP" cy:nodeId="108030">
    <graphics y="-207.8553626225546" z="0.0" x="643.5212851340953"/>
  </node>
  <node id="146119" label="HMGN3" cy:nodeId="111102">
    <graphics y="-934.6432044194296" z="0.0" x="561.9986410911265"/>
  </node>
  <node id="145952" label="STAT5B" cy:nodeId="108029">
    <graphics y="-43.146744458492094" z="0.0" x="619.488997536439"/>
  </node>
  <node id="145976" label="SIN3A" cy:nodeId="105984">
    <graphics y="301.62927177685947" z="0.0" x="589.3333578880015"/>
  </node>
  <node id="146011" label="B3GALT5" cy:nodeId="108034">
    <graphics y="678.7880089594767" z="0.0" x="240.84449680401713"/>
  </node>
  <node id="146083" label="HS3ST3A1" cy:nodeId="108033">
    <graphics y="-893.3156897709921" z="0.0" x="-1339.7804726784047"/>
  </node>
  <node id="146364" label="UGCG" cy:nodeId="105985">
    <graphics y="317.2566521479532" z="0.0" x="106.43270786358744"/>
  </node>
  <node id="145972" label="SMAD4" cy:nodeId="105987">
    <graphics y="262.2398217036173" z="0.0" x="628.4671469505015"/>
  </node>
  <node id="145968" label="SMC3" cy:nodeId="105990">
    <graphics y="226.65541008252353" z="0.0" x="609.661604958314"/>
  </node>
  <node id="145969" label="SMC1A" cy:nodeId="105989">
    <graphics y="303.55876091260166" z="0.0" x="544.970686989564"/>
  </node>
  <node id="146192" label="SLC35E4" cy:nodeId="111112">
    <graphics y="-415.1408850834921" z="0.0" x="-294.29663173602194"/>
  </node>
  <node id="145966" label="SOX10" cy:nodeId="105991">
    <graphics y="1188.974105150883" z="0.0" x="-1645.6046914284047"/>
  </node>
  <node id="145954" label="SRCAP" cy:nodeId="105994">
    <graphics y="800.9880211665079" z="0.0" x="753.015120583314"/>
  </node>
  <node id="145927" label="TTF1" cy:nodeId="111116">
    <graphics y="-269.4192053959921" z="0.0" x="992.7809286887828"/>
  </node>
  <node id="146356" label="GANAB" cy:nodeId="105998">
    <graphics y="185.96073845166416" z="0.0" x="634.9257040794078"/>
  </node>
  <node id="146225" label="HPSE" cy:nodeId="106000">
    <graphics y="551.9009239985392" z="0.0" x="-671.7398842994985"/>
  </node>
  <node id="145951" label="SUMO2" cy:nodeId="106004">
    <graphics y="-526.7276770756796" z="0.0" x="609.300276833314"/>
  </node>
  <node id="145948" label="TAF1" cy:nodeId="106006">
    <graphics y="167.4033387019083" z="0.0" x="483.63712986065775"/>
  </node>
  <node id="146158" label="COG1" cy:nodeId="106005">
    <graphics y="-242.94133064013272" z="0.0" x="1433.0228720481578"/>
  </node>
  <node id="145943" label="TCF12" cy:nodeId="106007">
    <graphics y="91.04480865735263" z="0.0" x="455.32047947003275"/>
  </node>
  <node id="145942" label="TCF7L1" cy:nodeId="106009">
    <graphics y="-463.5515296147421" z="0.0" x="64.28005893780619"/>
  </node>
  <node id="146256" label="ALG5" cy:nodeId="106012">
    <graphics y="-648.3497473881796" z="0.0" x="814.533675270814"/>
  </node>
  <node id="145940" label="TDRD3" cy:nodeId="106011">
    <graphics y="-737.8588416264608" z="0.0" x="760.4913168723765"/>
  </node>
  <node id="146290" label="GALNT1" cy:nodeId="106014">
    <graphics y="304.3603356196329" z="0.0" x="879.811751442689"/>
  </node>
  <node id="145939" label="TEAD1" cy:nodeId="106013">
    <graphics y="344.4938500239298" z="0.0" x="679.7861777122203"/>
  </node>
  <node id="145937" label="TET2" cy:nodeId="106016">
    <graphics y="195.72106102246494" z="0.0" x="586.6779013450328"/>
  </node>
  <node id="145938" label="TERF1" cy:nodeId="106015">
    <graphics y="680.7927086665079" z="0.0" x="676.9485312278453"/>
  </node>
  <node id="145926" label="UBTF" cy:nodeId="106020">
    <graphics y="-275.41416999560147" z="0.0" x="557.2084189231578"/>
  </node>
  <node id="145924" label="USF2" cy:nodeId="106022">
    <graphics y="-45.02902290087491" z="0.0" x="-405.92353908465475"/>
  </node>
  <node id="145925" label="USF1" cy:nodeId="106021">
    <graphics y="-543.4181677983358" z="0.0" x="272.3275900657359"/>
  </node>
  <node id="145921" label="WDR5" cy:nodeId="106024">
    <graphics y="-484.98567268114834" z="0.0" x="154.8576956565562"/>
  </node>
  <node id="145922" label="VEZF1" cy:nodeId="106023">
    <graphics y="277.37892082471103" z="0.0" x="440.3206625755015"/>
  </node>
  <node id="145918" label="ZBTB17" cy:nodeId="106029">
    <graphics y="-504.9361731694296" z="0.0" x="-46.908257407408655"/>
  </node>
  <node id="145917" label="ZBTB33" cy:nodeId="106031">
    <graphics y="326.81994560498447" z="0.0" x="350.8535910422984"/>
  </node>
  <node id="146080" label="B3GAT1" cy:nodeId="113216">
    <graphics y="-780.8969275639608" z="0.0" x="-1286.0486611549672"/>
  </node>
  <node id="146150" label="NEU4" cy:nodeId="113217">
    <graphics y="-715.1104895756796" z="0.0" x="581.140120583314"/>
  </node>
  <node id="145974" label="GMDS" cy:nodeId="113219">
    <graphics y="-651.2877356694296" z="0.0" x="466.76835544659525"/>
  </node>
  <node id="145936" label="TFAM" cy:nodeId="113234">
    <graphics y="201.32189872998447" z="0.0" x="1136.2843466575328"/>
  </node>
  <node id="145990" label="RBPJ" cy:nodeId="113233">
    <graphics y="182.94622734326572" z="0.0" x="782.3826132590953"/>
  </node>
  <node id="145923" label="USP49" cy:nodeId="113235">
    <graphics y="-549.2077796147421" z="0.0" x="1544.9335165794078"/>
  </node>
  <node id="146182" label="DDX5" cy:nodeId="112218">
    <graphics y="3.155570299808687" z="0.0" x="16.68740757061869"/>
  </node>
  <node id="146208" label="CHD7" cy:nodeId="112217">
    <graphics y="244.87509086865634" z="0.0" x="740.8807822044078"/>
  </node>
  <node id="146146" label="GLIS3" cy:nodeId="112220">
    <graphics y="658.5968468501017" z="0.0" x="-1106.449479026061"/>
  </node>
  <node id="146125" label="HEXIM1" cy:nodeId="112221">
    <graphics y="-1129.6873938725546" z="0.0" x="-134.05063335345358"/>
  </node>
  <node id="145980" label="B4GALT4" cy:nodeId="112227">
    <graphics y="1476.3443138911173" z="0.0" x="-2307.858055991393"/>
  </node>
  <node id="146221" label="B4GALT1" cy:nodeId="107274">
    <graphics y="568.7158959223673" z="0.0" x="-831.282242697936"/>
  </node>
  <node id="146343" label="ASH2L" cy:nodeId="107273">
    <graphics y="71.6546471430704" z="0.0" x="148.69763095929056"/>
  </node>
  <node id="146279" label="BRD2" cy:nodeId="107276">
    <graphics y="13.038115771000093" z="0.0" x="538.933577614564"/>
  </node>
  <node id="146296" label="BCL6" cy:nodeId="107275">
    <graphics y="435.6047203852579" z="0.0" x="35.763411598939"/>
  </node>
  <node id="146337" label="FUT10" cy:nodeId="107278">
    <graphics y="700.5003502680704" z="0.0" x="408.5240011985484"/>
  </node>
  <node id="146273" label="BRD3" cy:nodeId="107277">
    <graphics y="166.53072670239658" z="0.0" x="675.0763388450328"/>
  </node>
  <node id="146092" label="B4GALT5" cy:nodeId="107279">
    <graphics y="782.1547081782267" z="0.0" x="908.553694802064"/>
  </node>
  <node id="146129" label="SLC35B3" cy:nodeId="107281">
    <graphics y="-363.71467658739834" z="0.0" x="891.4302206809703"/>
  </node>
  <node id="146179" label="E2F3" cy:nodeId="107284">
    <graphics y="120.25735655564517" z="0.0" x="695.7945395286265"/>
  </node>
  <node id="146255" label="ALG8" cy:nodeId="107286">
    <graphics y="-527.2367713139608" z="0.0" x="1156.5175009544078"/>
  </node>
  <node id="145949" label="FUT2" cy:nodeId="107287">
    <graphics y="-346.21650764208584" z="0.0" x="-370.0382546608266"/>
  </node>
  <node id="146121" label="ASAH1" cy:nodeId="107290">
    <graphics y="747.4794152094767" z="0.0" x="-136.26355831072897"/>
  </node>
  <node id="146197" label="FUT3" cy:nodeId="107289">
    <graphics y="-841.5624549077108" z="0.0" x="-360.35530177996725"/>
  </node>
  <node id="146171" label="ERCC3" cy:nodeId="107292">
    <graphics y="-377.32566901903897" z="0.0" x="778.2474814231578"/>
  </node>
  <node id="146308" label="HK1" cy:nodeId="107293">
    <graphics y="-462.8110510991171" z="0.0" x="-1647.5529336159047"/>
  </node>
  <node id="146005" label="GCNT2" cy:nodeId="107296">
    <graphics y="-360.6122290776327" z="0.0" x="973.9888144309703"/>
  </node>
  <node id="146152" label="FOXK1" cy:nodeId="107298">
    <graphics y="-339.1610266850546" z="0.0" x="1270.3745566184703"/>
  </node>
  <node id="146354" label="GNE" cy:nodeId="107297">
    <graphics y="-2.363136975581938" z="0.0" x="490.548323708314"/>
  </node>
  <node id="146275" label="ALG11" cy:nodeId="107300">
    <graphics y="225.22879722851962" z="0.0" x="667.970686989564"/>
  </node>
  <node id="146007" label="EXTL3" cy:nodeId="107299">
    <graphics y="839.8880455805704" z="0.0" x="29.76327426983744"/>
  </node>
  <node id="146137" label="GTF3C2" cy:nodeId="107302">
    <graphics y="481.0240319086954" z="0.0" x="695.3087607200328"/>
  </node>
  <node id="146218" label="GALNT2" cy:nodeId="107306">
    <graphics y="656.1592247797892" z="0.0" x="-796.7414101784047"/>
  </node>
  <node id="146271" label="EXT2" cy:nodeId="107307">
    <graphics y="323.7877953364298" z="0.0" x="780.5831747825328"/>
  </node>
  <node id="146161" label="GBA" cy:nodeId="107309">
    <graphics y="-463.80049201708584" z="0.0" x="863.1726523215953"/>
  </node>
  <node id="146106" label="JARID2" cy:nodeId="107311">
    <graphics y="481.78431633252353" z="0.0" x="618.6592245872203"/>
  </node>
  <node id="146091" label="KDM5C" cy:nodeId="107314">
    <graphics y="-76.84948798876553" z="0.0" x="186.1351157005015"/>
  </node>
  <node id="146098" label="KDM2B" cy:nodeId="107313">
    <graphics y="-50.44799873095303" z="0.0" x="556.1399985130015"/>
  </node>
  <node id="146090" label="KDM6B" cy:nodeId="107315">
    <graphics y="-114.60615607958584" z="0.0" x="636.677474098939"/>
  </node>
  <node id="146062" label="MED12" cy:nodeId="107324">
    <graphics y="115.78967192906589" z="0.0" x="648.9551230247203"/>
  </node>
  <node id="146066" label="MBD3" cy:nodeId="107323">
    <graphics y="-624.3360144780233" z="0.0" x="151.61665256573588"/>
  </node>
  <node id="146035" label="NCOR2" cy:nodeId="107326">
    <graphics y="-281.82493659716397" z="0.0" x="413.7086325462046"/>
  </node>
  <node id="146051" label="MEF2D" cy:nodeId="107325">
    <graphics y="-57.71499702196866" z="0.0" x="-2255.0315713112172"/>
  </node>
  <node id="146294" label="PAPSS2" cy:nodeId="107328">
    <graphics y="729.1681359126017" z="0.0" x="-6.253609580260218"/>
  </node>
  <node id="146293" label="POFUT2" cy:nodeId="107327">
    <graphics y="-212.66755744677334" z="0.0" x="376.1193991477671"/>
  </node>
  <node id="146031" label="NFYA" cy:nodeId="107329">
    <graphics y="136.41874054211826" z="0.0" x="366.9148703391734"/>
  </node>
  <node id="146087" label="B4GALT6" cy:nodeId="107331">
    <graphics y="-379.6670081303671" z="0.0" x="-725.3260659401235"/>
  </node>
  <node id="146013" label="PHF8" cy:nodeId="107334">
    <graphics y="11.731200487796968" z="0.0" x="443.26322849347025"/>
  </node>
  <node id="146022" label="NRF1" cy:nodeId="107333">
    <graphics y="-408.2923743413046" z="0.0" x="293.1058493430796"/>
  </node>
  <node id="145978" label="SETDB1" cy:nodeId="107339">
    <graphics y="-223.27598640185147" z="0.0" x="565.3016806419078"/>
  </node>
  <node id="145973" label="SMAD1" cy:nodeId="107341">
    <graphics y="314.35441520947666" z="0.0" x="730.614241677064"/>
  </node>
  <node id="145971" label="SMARCA4" cy:nodeId="107343">
    <graphics y="-343.62339851122647" z="0.0" x="509.233382302064"/>
  </node>
  <node id="145957" label="SP2" cy:nodeId="107346">
    <graphics y="-906.0404212163046" z="0.0" x="1131.5718222434703"/>
  </node>
  <node id="145961" label="SOX2" cy:nodeId="107345">
    <graphics y="201.36781242627353" z="0.0" x="917.9808188255015"/>
  </node>
  <node id="146048" label="LAMP2" cy:nodeId="107350">
    <graphics y="1030.944564135258" z="0.0" x="-844.4823159401235"/>
  </node>
  <node id="145947" label="TAF3" cy:nodeId="107351">
    <graphics y="664.6077721430704" z="0.0" x="945.9100790794078"/>
  </node>
  <node id="145935" label="TFCP2" cy:nodeId="107355">
    <graphics y="-439.0133216069296" z="0.0" x="1083.6362753684703"/>
  </node>
</graph>
