# Supplementary material for: A systems-based framework to computationally describe putative transcription factors and signaling pathways regulating glycan biosynthesis
Source: publisher site journal article supplement (doi:10.3762/bjoc.17.119), 2021-07-22
Supplement: Additional file 2 [file 1860-5397-17-119-S2.cys › CytoscapeSession-2021_03_21-12_01/views/116589-135857-LIHC.xgmml]

<?xml version="1.0" encoding="UTF-8" standalone="yes"?>
<graph id="135857" label="LIHC" cy:view="1" cy:networkId="116589" cy:visualStyle="default" cy:rendererId="org.cytoscape.ding" cy:documentVersion="3.0" xmlns:dc="http://purl.org/dc/elements/1.1/" xmlns:xlink="http://www.w3.org/1999/xlink" xmlns:rdf="http://www.w3.org/1999/02/22-rdf-syntax-ns#" xmlns:cy="http://www.cytoscape.org" xmlns="http://www.cs.rpi.edu/XGMML">
  <graphics>
    <att name="NETWORK_NODE_SELECTION" value="true" type="string" cy:type="String"/>
    <att name="NETWORK_CENTER_X_LOCATION" value="-169.59515380859375" type="string" cy:type="String"/>
    <att name="NETWORK_HEIGHT" value="510.0" type="string" cy:type="String"/>
    <att name="NETWORK_TITLE" value="LIHC" type="string" cy:type="String"/>
    <att name="NETWORK_EDGE_SELECTION" value="true" type="string" cy:type="String"/>
    <att name="NETWORK_CENTER_Y_LOCATION" value="256.76483154296875" type="string" cy:type="String"/>
    <att name="NETWORK_WIDTH" value="1312.0" type="string" cy:type="String"/>
    <att name="NETWORK_DEPTH" value="0.0" type="string" cy:type="String"/>
    <att name="NETWORK_SCALE_FACTOR" value="0.13766089208820023" type="string" cy:type="String"/>
    <att name="NETWORK_ANNOTATION_SELECTION" value="false" type="string" cy:type="String"/>
    <att name="NETWORK_CENTER_Z_LOCATION" value="0.0" type="string" cy:type="String"/>
  </graphics>
  <node id="135974" label="PIGV" cy:nodeId="111090">
    <graphics y="-689.5436700571363" z="0.0" x="640.9754350742446"/>
  </node>
  <node id="136022" label="BCL3" cy:nodeId="111092">
    <graphics y="1425.2237859975512" z="0.0" x="1111.2142046054946"/>
  </node>
  <node id="135905" label="PDX1" cy:nodeId="108019">
    <graphics y="133.55815184227777" z="0.0" x="-1540.9558393398179"/>
  </node>
  <node id="135932" label="FPGT" cy:nodeId="105976">
    <graphics y="-1156.2928155649488" z="0.0" x="610.0889604648696"/>
  </node>
  <node id="135891" label="SCML2" cy:nodeId="108025">
    <graphics y="-305.24082887061286" z="0.0" x="135.13800984231102"/>
  </node>
  <node id="135958" label="A4GNT" cy:nodeId="111099">
    <graphics y="140.40031492821527" z="0.0" x="-1314.3126508632554"/>
  </node>
  <node id="135883" label="SIX5" cy:nodeId="105986">
    <graphics y="41.06355345360589" z="0.0" x="-180.095274154271"/>
  </node>
  <node id="136067" label="UGCG" cy:nodeId="105985">
    <graphics y="-798.80337464698" z="0.0" x="120.06482487527"/>
  </node>
  <node id="136032" label="ATF4" cy:nodeId="108550">
    <graphics y="662.736420274895" z="0.0" x="-344.3088666835679"/>
  </node>
  <node id="135934" label="SLC35E4" cy:nodeId="111112">
    <graphics y="749.89730894677" z="0.0" x="-95.24659556540382"/>
  </node>
  <node id="135941" label="GCNT1" cy:nodeId="108552">
    <graphics y="1115.5405584584887" z="0.0" x="898.8057573398696"/>
  </node>
  <node id="135875" label="TBL1X" cy:nodeId="111113">
    <graphics y="-1208.7721856821363" z="0.0" x="-374.69918650778664"/>
  </node>
  <node id="135881" label="SREBF2" cy:nodeId="105995">
    <graphics y="-370.09442078955817" z="0.0" x="-123.22086924704445"/>
  </node>
  <node id="135988" label="GANAB" cy:nodeId="105998">
    <graphics y="-507.88210999854255" z="0.0" x="46.55975514260399"/>
  </node>
  <node id="136038" label="PIGC" cy:nodeId="108558">
    <graphics y="76.99505674950433" z="0.0" x="-104.89379710348976"/>
  </node>
  <node id="135942" label="HPSE" cy:nodeId="106000">
    <graphics y="1204.6489568959887" z="0.0" x="686.9155595859634"/>
  </node>
  <node id="135880" label="STAT1" cy:nodeId="105999">
    <graphics y="1185.9612127553637" z="0.0" x="566.6965044101821"/>
  </node>
  <node id="135878" label="STAT4" cy:nodeId="106002">
    <graphics y="1566.9504705678637" z="0.0" x="965.7294023594009"/>
  </node>
  <node id="136025" label="GALNT6" cy:nodeId="108561">
    <graphics y="1123.5492254506762" z="0.0" x="376.54251271096336"/>
  </node>
  <node id="135935" label="COG1" cy:nodeId="106005">
    <graphics y="555.0151678334887" z="0.0" x="-11.227216903294448"/>
  </node>
  <node id="135871" label="TCF7" cy:nodeId="106008">
    <graphics y="2045.2975164663012" z="0.0" x="-1458.4164792934312"/>
  </node>
  <node id="135952" label="NAGA" cy:nodeId="108567">
    <graphics y="-802.4461358774488" z="0.0" x="665.3367021640884"/>
  </node>
  <node id="135869" label="TCF7L1" cy:nodeId="106009">
    <graphics y="33.77526915184808" z="0.0" x="-674.5061323085679"/>
  </node>
  <node id="135992" label="SLC35B2" cy:nodeId="108572">
    <graphics y="136.9335027944262" z="0.0" x="-181.21264475973976"/>
  </node>
  <node id="136014" label="GALNT1" cy:nodeId="106014">
    <graphics y="-659.5032647836988" z="0.0" x="469.3219926914321"/>
  </node>
  <node id="135989" label="E2F8" cy:nodeId="108575">
    <graphics y="-205.91380250342536" z="0.0" x="42.18554859963524"/>
  </node>
  <node id="135868" label="USF1" cy:nodeId="106021">
    <graphics y="693.4338690053637" z="0.0" x="-694.7718183437241"/>
  </node>
  <node id="135864" label="WDR5" cy:nodeId="106024">
    <graphics y="223.62097227684808" z="0.0" x="-208.60561961325539"/>
  </node>
  <node id="135929" label="UGP2" cy:nodeId="108584">
    <graphics y="-952.1306451547925" z="0.0" x="720.2817705234634"/>
  </node>
  <node id="135960" label="B3GALT4" cy:nodeId="106030">
    <graphics y="1945.2975164663012" z="0.0" x="1318.7929399570571"/>
  </node>
  <node id="135862" label="ZBTB33" cy:nodeId="106031">
    <graphics y="-727.29995667823" z="0.0" x="12.281907852564927"/>
  </node>
  <node id="135922" label="NCAPG" cy:nodeId="108602">
    <graphics y="291.90292418114495" z="0.0" x="47.23790913430321"/>
  </node>
  <node id="135895" label="RBCK1" cy:nodeId="108610">
    <graphics y="312.1629644643481" z="0.0" x="-622.9681074062241"/>
  </node>
  <node id="135972" label="FOXP1" cy:nodeId="113218">
    <graphics y="-219.24501740821051" z="0.0" x="-314.9364606777085"/>
  </node>
  <node id="135896" label="HYAL3" cy:nodeId="113220">
    <graphics y="2045.2975164663012" z="0.0" x="-1059.2828275600327"/>
  </node>
  <node id="135894" label="RING1" cy:nodeId="108613">
    <graphics y="64.46627867333245" z="0.0" x="621.2763994297134"/>
  </node>
  <node id="135886" label="SFMBT1" cy:nodeId="108615">
    <graphics y="-524.4490350473707" z="0.0" x="417.863954361354"/>
  </node>
  <node id="135928" label="LEO1" cy:nodeId="113227">
    <graphics y="-420.6813958872144" z="0.0" x="455.05346852151024"/>
  </node>
  <node id="135906" label="PCGF6" cy:nodeId="113232">
    <graphics y="-154.8291581857984" z="0.0" x="609.2893999179946"/>
  </node>
  <node id="135909" label="PBX3" cy:nodeId="113231">
    <graphics y="-432.7779535044019" z="0.0" x="-21.14348429831398"/>
  </node>
  <node id="135984" label="ESR1" cy:nodeId="112219">
    <graphics y="-1208.1364434946363" z="0.0" x="167.98033314553368"/>
  </node>
  <node id="136033" label="B4GALT4" cy:nodeId="112227">
    <graphics y="118.68551695458245" z="0.0" x="-421.79467600973976"/>
  </node>
  <node id="135890" label="C1GALT1" cy:nodeId="109670">
    <graphics y="-187.28386628516364" z="0.0" x="328.8498399814712"/>
  </node>
  <node id="136053" label="ARSD" cy:nodeId="112230">
    <graphics y="-1479.0389093149488" z="0.0" x="479.39773732033836"/>
  </node>
  <node id="136045" label="UXS1" cy:nodeId="109669">
    <graphics y="176.50741636864495" z="0.0" x="34.750215347682115"/>
  </node>
  <node id="135966" label="ALG2" cy:nodeId="109671">
    <graphics y="139.76969969384027" z="0.0" x="342.1498735508071"/>
  </node>
  <node id="135874" label="GLB1" cy:nodeId="109675">
    <graphics y="-1330.5033868540113" z="0.0" x="-486.7121869960679"/>
  </node>
  <node id="136005" label="XYLT2" cy:nodeId="109684">
    <graphics y="-170.3282388437574" z="0.0" x="-488.06881541403664"/>
  </node>
  <node id="136060" label="UGT1A3" cy:nodeId="109688">
    <graphics y="-1353.9483331430738" z="0.0" x="432.95569020119774"/>
  </node>
  <node id="135965" label="PIGG" cy:nodeId="109689">
    <graphics y="253.00238096825433" z="0.0" x="348.91226368752586"/>
  </node>
  <node id="136001" label="CEBPG" cy:nodeId="110791">
    <graphics y="1192.6612859975512" z="0.0" x="-494.19918650778664"/>
  </node>
  <node id="135999" label="DDIT3" cy:nodeId="110793">
    <graphics y="1078.4601141225512" z="0.0" x="-338.044981185521"/>
  </node>
  <node id="136030" label="SGSH" cy:nodeId="110804">
    <graphics y="431.1787420522387" z="0.0" x="-311.7616254726304"/>
  </node>
  <node id="136016" label="STT3B" cy:nodeId="105688">
    <graphics y="-711.85610902198" z="0.0" x="366.2119768222915"/>
  </node>
  <node id="136066" label="MAN1A2" cy:nodeId="105687">
    <graphics y="-919.2494806040113" z="0.0" x="367.17846852151024"/>
  </node>
  <node id="135918" label="FUT11" cy:nodeId="105690">
    <graphics y="-987.40786683448" z="0.0" x="-159.853819076146"/>
  </node>
  <node id="136063" label="NEU3" cy:nodeId="105689">
    <graphics y="-990.081939100105" z="0.0" x="489.35193043557274"/>
  </node>
  <node id="135882" label="SND1" cy:nodeId="110812">
    <graphics y="-248.31652772315192" z="0.0" x="-91.60099620016945"/>
  </node>
  <node id="136015" label="COG5" cy:nodeId="105692">
    <graphics y="-487.02349793799567" z="0.0" x="158.8812425693618"/>
  </node>
  <node id="136068" label="ACER2" cy:nodeId="105691">
    <graphics y="-933.1145929086988" z="0.0" x="274.7531602939712"/>
  </node>
  <node id="136069" label="MAN2A1" cy:nodeId="105694">
    <graphics y="-1070.2818292368238" z="0.0" x="463.4313676914321"/>
  </node>
  <node id="136070" label="AR" cy:nodeId="105693">
    <graphics y="-1203.0500177133863" z="0.0" x="318.6728227695571"/>
  </node>
  <node id="135930" label="SLC35F5" cy:nodeId="105696">
    <graphics y="-900.20571839698" z="0.0" x="178.82673817483055"/>
  </node>
  <node id="136065" label="SLC35A3" cy:nodeId="105695">
    <graphics y="-871.04605042823" z="0.0" x="313.4111040195571"/>
  </node>
  <node id="135916" label="GALNT10" cy:nodeId="105697">
    <graphics y="-1097.1677545297925" z="0.0" x="-133.06840342673195"/>
  </node>
  <node id="135977" label="RTF1" cy:nodeId="105700">
    <graphics y="-679.062407850105" z="0.0" x="-125.2812330165757"/>
  </node>
  <node id="135953" label="SLC35A5" cy:nodeId="105702">
    <graphics y="-771.569243787605" z="0.0" x="313.1592271885024"/>
  </node>
  <node id="135982" label="GALNT4" cy:nodeId="105703">
    <graphics y="-520.6611322153394" z="0.0" x="-97.46778697165382"/>
  </node>
  <node id="135861" label="UGGT1" cy:nodeId="105705">
    <graphics y="-813.1003717172925" z="0.0" x="-215.87234324606789"/>
  </node>
  <node id="135907" label="B3GNT5" cy:nodeId="105707">
    <graphics y="-427.5128167856519" z="0.0" x="-266.388487044896"/>
  </node>
  <node id="136018" label="ALG10" cy:nodeId="105711">
    <graphics y="-85.37820470221686" z="0.0" x="253.39785939065086"/>
  </node>
  <node id="136013" label="FKTN" cy:nodeId="105713">
    <graphics y="-680.18521058448" z="0.0" x="86.03316670266258"/>
  </node>
  <node id="135931" label="MAN1A1" cy:nodeId="105716">
    <graphics y="-1063.6822198618238" z="0.0" x="719.8616045078384"/>
  </node>
  <node id="136017" label="CSGALNACT2" cy:nodeId="105715">
    <graphics y="-755.006743787605" z="0.0" x="502.423036392604"/>
  </node>
  <node id="136021" label="CHST11" cy:nodeId="105718">
    <graphics y="1407.4369207631762" z="0.0" x="973.8282793125259"/>
  </node>
  <node id="135963" label="CHSY1" cy:nodeId="105717">
    <graphics y="2054.595093370598" z="0.0" x="-1558.4164792934312"/>
  </node>
  <node id="136058" label="SULT1B1" cy:nodeId="114936">
    <graphics y="-1368.6352227915113" z="0.0" x="546.7310808261977"/>
  </node>
  <node id="135867" label="DPM3" cy:nodeId="105722">
    <graphics y="773.74838316552" z="0.0" x="-817.2849409023179"/>
  </node>
  <node id="136027" label="BATF" cy:nodeId="105721">
    <graphics y="992.3456121694262" z="0.0" x="165.78432637063133"/>
  </node>
  <node id="136020" label="BMI1" cy:nodeId="105726">
    <graphics y="-636.42056214698" z="0.0" x="324.75911122170555"/>
  </node>
  <node id="136019" label="ALG10B" cy:nodeId="105727">
    <graphics y="-817.9423516977613" z="0.0" x="202.77791767922508"/>
  </node>
  <node id="135900" label="PIGN" cy:nodeId="105730">
    <graphics y="-559.2087396372144" z="0.0" x="199.6122224887954"/>
  </node>
  <node id="135985" label="PIGW" cy:nodeId="105729">
    <graphics y="-231.51733338721442" z="0.0" x="439.8516252597915"/>
  </node>
  <node id="136012" label="SLC35E3" cy:nodeId="105732">
    <graphics y="-565.7528985727613" z="0.0" x="272.97097950783836"/>
  </node>
  <node id="135970" label="FAM20B" cy:nodeId="105731">
    <graphics y="-452.0807794321363" z="0.0" x="-431.8032514491929"/>
  </node>
  <node id="136034" label="ALG12" cy:nodeId="105734">
    <graphics y="-81.4952958811109" z="0.0" x="-244.13430613669289"/>
  </node>
  <node id="135888" label="CMAS" cy:nodeId="105742">
    <graphics y="-265.13934266455817" z="0.0" x="224.28877430764305"/>
  </node>
  <node id="135884" label="FUT10" cy:nodeId="107278">
    <graphics y="-397.8251641977613" z="0.0" x="609.5384233554946"/>
  </node>
  <node id="135893" label="RFNG" cy:nodeId="105744">
    <graphics y="198.53561461083245" z="0.0" x="732.7521074375259"/>
  </node>
  <node id="135967" label="B4GALT5" cy:nodeId="107279">
    <graphics y="-111.50555837042975" z="0.0" x="86.88464241829979"/>
  </node>
  <node id="136009" label="CBX4" cy:nodeId="105743">
    <graphics y="356.05661070458245" z="0.0" x="-39.64715403708351"/>
  </node>
  <node id="135915" label="MAN2A2" cy:nodeId="105748">
    <graphics y="-646.1941217172925" z="0.0" x="-200.6832868495835"/>
  </node>
  <node id="135973" label="ST3GAL3" cy:nodeId="105747">
    <graphics y="-153.4955857981031" z="0.0" x="810.3720415195571"/>
  </node>
  <node id="135887" label="ALG8" cy:nodeId="107286">
    <graphics y="-303.6093744028394" z="0.0" x="325.8643663486587"/>
  </node>
  <node id="136006" label="CBX8" cy:nodeId="105752">
    <graphics y="212.54168760887933" z="0.0" x="-481.1162397304429"/>
  </node>
  <node id="135990" label="B3GAT3" cy:nodeId="105754">
    <graphics y="624.169525743645" z="0.0" x="-137.72183055075539"/>
  </node>
  <node id="136010" label="PAPSS1" cy:nodeId="107291">
    <graphics y="-152.70218598731208" z="0.0" x="202.02207356301415"/>
  </node>
  <node id="135995" label="DPM2" cy:nodeId="105758">
    <graphics y="604.5816961538012" z="0.0" x="-416.0860883632554"/>
  </node>
  <node id="136004" label="MAN1B1" cy:nodeId="105760">
    <graphics y="500.98373472801995" z="0.0" x="-392.867246810521"/>
  </node>
  <node id="136008" label="MOGS" cy:nodeId="105762">
    <graphics y="57.848175645988704" z="0.0" x="46.74983769265282"/>
  </node>
  <node id="135863" label="POMT1" cy:nodeId="105761">
    <graphics y="204.51080381981683" z="0.0" x="-374.44335765036476"/>
  </node>
  <node id="136064" label="GNE" cy:nodeId="107297">
    <graphics y="-1032.7823175180738" z="0.0" x="305.87068348733055"/>
  </node>
  <node id="136003" label="CEBPA" cy:nodeId="105764">
    <graphics y="2054.595093370598" z="0.0" x="-1159.2828275600327"/>
  </node>
  <node id="135968" label="EXTL3" cy:nodeId="107299">
    <graphics y="220.01788389794183" z="0.0" x="127.77148609963524"/>
  </node>
  <node id="136028" label="CHST12" cy:nodeId="105763">
    <graphics y="738.6748358022387" z="0.0" x="-288.356504623021"/>
  </node>
  <node id="136026" label="NAGK" cy:nodeId="105765">
    <graphics y="680.6324774038012" z="0.0" x="50.09124928322899"/>
  </node>
  <node id="135859" label="GALNT2" cy:nodeId="107306">
    <graphics y="-914.8857110727613" z="0.0" x="-265.1217328945054"/>
  </node>
  <node id="136042" label="GNPDA1" cy:nodeId="107305">
    <graphics y="401.78595030419183" z="0.0" x="-236.38744944723976"/>
  </node>
  <node id="135889" label="NDST2" cy:nodeId="105772">
    <graphics y="-325.3298333872144" z="0.0" x="-39.74023265036476"/>
  </node>
  <node id="135901" label="OGT" cy:nodeId="105771">
    <graphics y="-591.6235040415113" z="0.0" x="100.07149487343895"/>
  </node>
  <node id="135908" label="EXT2" cy:nodeId="107307">
    <graphics y="-427.28082215674567" z="0.0" x="265.2143266758071"/>
  </node>
  <node id="135933" label="KAT2B" cy:nodeId="107312">
    <graphics y="-925.605376600105" z="0.0" x="448.34790211526024"/>
  </node>
  <node id="135944" label="LAMP3" cy:nodeId="105776">
    <graphics y="901.2890325795825" z="0.0" x="491.57068043557274"/>
  </node>
  <node id="135961" label="GAL3ST4" cy:nodeId="105778">
    <graphics y="1730.1450506459887" z="0.0" x="1126.0613725742446"/>
  </node>
  <node id="135865" label="B4GALT7" cy:nodeId="105782">
    <graphics y="698.642670274895" z="0.0" x="-920.4158613124741"/>
  </node>
  <node id="135939" label="B3GALT6" cy:nodeId="105781">
    <graphics y="970.0714422475512" z="0.0" x="-166.78657359274757"/>
  </node>
  <node id="136000" label="CREB3L4" cy:nodeId="105788">
    <graphics y="314.30926573387933" z="0.0" x="-523.0494672695054"/>
  </node>
  <node id="135866" label="GMPPA" cy:nodeId="105787">
    <graphics y="854.6330877553637" z="0.0" x="-895.9873334804429"/>
  </node>
  <node id="135925" label="MBD3" cy:nodeId="107323">
    <graphics y="824.6611639272387" z="0.0" x="-454.49593943747414"/>
  </node>
  <node id="136040" label="B4GALT3" cy:nodeId="105789">
    <graphics y="314.72396910301995" z="0.0" x="-306.898496810521"/>
  </node>
  <node id="135980" label="POFUT1" cy:nodeId="105792">
    <graphics y="-765.869536756355" z="0.0" x="-61.87054270895851"/>
  </node>
  <node id="136049" label="PAPSS2" cy:nodeId="107328">
    <graphics y="-1541.0655206430738" z="0.0" x="303.9998491367446"/>
  </node>
  <node id="136043" label="POFUT2" cy:nodeId="107327">
    <graphics y="158.62268126122308" z="0.0" x="-89.58239573630226"/>
  </node>
  <node id="135997" label="E2F1" cy:nodeId="105796">
    <graphics y="287.3614507924731" z="0.0" x="-176.27323741110695"/>
  </node>
  <node id="136011" label="B4GALT6" cy:nodeId="107331">
    <graphics y="-555.0464471567457" z="0.0" x="549.2464006504165"/>
  </node>
  <node id="135902" label="PHF8" cy:nodeId="107334">
    <graphics y="-776.9679864633863" z="0.0" x="253.78547840920555"/>
  </node>
  <node id="135998" label="SLC35B1" cy:nodeId="105798">
    <graphics y="909.3352361928637" z="0.0" x="-288.909238998021"/>
  </node>
  <node id="135947" label="ALG3" cy:nodeId="105797">
    <graphics y="411.74688780419183" z="0.0" x="-489.7868940273179"/>
  </node>
  <node id="135921" label="DPM1" cy:nodeId="105799">
    <graphics y="403.76080381981683" z="0.0" x="253.52604847756493"/>
  </node>
  <node id="136036" label="SLC35A2" cy:nodeId="107335">
    <graphics y="-71.53332841284919" z="0.0" x="-119.91016978415382"/>
  </node>
  <node id="136029" label="FUT1" cy:nodeId="105802">
    <graphics y="1019.2895818959887" z="0.0" x="-430.83407420309914"/>
  </node>
  <node id="135892" label="MPI" cy:nodeId="107340">
    <graphics y="92.0647283803637" z="0.0" x="806.1801469883071"/>
  </node>
  <node id="135860" label="ST3GAL2" cy:nodeId="105806">
    <graphics y="-873.566314100105" z="0.0" x="-114.62086314352882"/>
  </node>
  <node id="135904" label="FUT4" cy:nodeId="105810">
    <graphics y="204.9852606069262" z="0.0" x="-1657.9833051601304"/>
  </node>
  <node id="136072" label="AHR" cy:nodeId="106836">
    <graphics y="-797.1631768930738" z="0.0" x="1033.8783891758071"/>
  </node>
  <node id="136056" label="ST3GAL6" cy:nodeId="105811">
    <graphics y="-1360.5468438852613" z="0.0" x="325.7691820224868"/>
  </node>
  <node id="136061" label="PIGK" cy:nodeId="106835">
    <graphics y="-1157.2896417368238" z="0.0" x="398.48547535744774"/>
  </node>
  <node id="136062" label="LAMP2" cy:nodeId="107350">
    <graphics y="-1113.850982068855" z="0.0" x="118.69597035256493"/>
  </node>
  <node id="135987" label="EGLN2" cy:nodeId="105813">
    <graphics y="772.0010076772387" z="0.0" x="-557.6635419765366"/>
  </node>
  <node id="135903" label="B4GALNT2" cy:nodeId="107352">
    <graphics y="54.58819639794183" z="0.0" x="-1652.5267621913804"/>
  </node>
  <node id="136024" label="ST6GALNAC4" cy:nodeId="106839">
    <graphics y="952.9039617788012" z="0.0" x="-2.814169112767104"/>
  </node>
  <node id="135910" label="UAP1" cy:nodeId="105820">
    <graphics y="-723.5030206430738" z="0.0" x="-524.2945844570054"/>
  </node>
  <node id="135917" label="SLC35E1" cy:nodeId="106844">
    <graphics y="-969.7214654672925" z="0.0" x="-21.18858927878273"/>
  </node>
  <node id="135912" label="COG6" cy:nodeId="105824">
    <graphics y="-1295.0577081430738" z="0.0" x="895.7693803867446"/>
  </node>
  <node id="136050" label="COG3" cy:nodeId="105823">
    <graphics y="-1016.1840509165113" z="0.0" x="174.47731953469383"/>
  </node>
  <node id="136051" label="MAN1C1" cy:nodeId="106853">
    <graphics y="-1343.9323419321363" z="0.0" x="221.5283372959243"/>
  </node>
  <node id="135986" label="ERF" cy:nodeId="105831">
    <graphics y="-25.79008424170661" z="0.0" x="351.6206987461196"/>
  </node>
  <node id="135943" label="ST8SIA4" cy:nodeId="105834">
    <graphics y="1385.1157537709887" z="0.0" x="773.6207597812759"/>
  </node>
  <node id="136071" label="GCNT4" cy:nodeId="106858">
    <graphics y="-784.3188775766675" z="0.0" x="838.8276079258071"/>
  </node>
  <node id="136046" label="MGAT4A" cy:nodeId="106860">
    <graphics y="234.7294012319262" z="0.0" x="-39.316076461399916"/>
  </node>
  <node id="136023" label="CHST2" cy:nodeId="105838">
    <graphics y="1144.5989080678637" z="0.0" x="175.24166279641258"/>
  </node>
  <node id="135879" label="ST8SIA1" cy:nodeId="105840">
    <graphics y="1319.0327459584887" z="0.0" x="529.6398027500259"/>
  </node>
  <node id="135954" label="HS3ST3B1" cy:nodeId="105841">
    <graphics y="-1030.7954400766675" z="0.0" x="601.8770464023696"/>
  </node>
  <node id="135979" label="MGAT2" cy:nodeId="106868">
    <graphics y="-731.5998224008863" z="0.0" x="169.30343037453758"/>
  </node>
  <node id="135870" label="ARSB" cy:nodeId="105843">
    <graphics y="2054.595093370598" z="0.0" x="-1358.849653426732"/>
  </node>
  <node id="135914" label="SLC35B4" cy:nodeId="105845">
    <graphics y="-1169.7017511118238" z="0.0" x="-44.796835128392104"/>
  </node>
  <node id="135940" label="IRF3" cy:nodeId="106872">
    <graphics y="774.8790594350512" z="0.0" x="-220.3410016933335"/>
  </node>
  <node id="136057" label="UGT1A5" cy:nodeId="116600">
    <graphics y="-1392.2045587290113" z="0.0" x="117.36945896950829"/>
  </node>
  <node id="136059" label="UGT1A4" cy:nodeId="116599">
    <graphics y="-1484.5791925180738" z="0.0" x="198.45030384865868"/>
  </node>
  <node id="135983" label="FOXA1" cy:nodeId="105850">
    <graphics y="-628.5205987680738" z="0.0" x="-64.7253248134507"/>
  </node>
  <node id="136052" label="UGT1A1" cy:nodeId="116602">
    <graphics y="-1191.8284600961988" z="0.0" x="479.093202408229"/>
  </node>
  <node id="136055" label="PGM1" cy:nodeId="116601">
    <graphics y="-1461.4478448618238" z="0.0" x="367.05044728127586"/>
  </node>
  <node id="136039" label="SULT1C2" cy:nodeId="116604">
    <graphics y="17.368553758781673" z="0.0" x="-354.899473373021"/>
  </node>
  <node id="136044" label="GAL3ST1" cy:nodeId="116603">
    <graphics y="174.47726500145745" z="0.0" x="-611.9735395351304"/>
  </node>
  <node id="135975" label="FOXA2" cy:nodeId="116606">
    <graphics y="-406.79751527198005" z="0.0" x="827.0267656406509"/>
  </node>
  <node id="136047" label="RPN2" cy:nodeId="105854">
    <graphics y="369.6075445424731" z="0.0" x="-155.37618846091164"/>
  </node>
  <node id="136037" label="SLC35D2" cy:nodeId="116605">
    <graphics y="477.56893980614495" z="0.0" x="117.6138208469497"/>
  </node>
  <node id="135927" label="LMNA" cy:nodeId="116608">
    <graphics y="1012.2398992788012" z="0.0" x="-783.3833295741929"/>
  </node>
  <node id="135969" label="GATA4" cy:nodeId="116607">
    <graphics y="113.15417540184808" z="0.0" x="161.98579579201805"/>
  </node>
  <node id="135991" label="ALG6" cy:nodeId="106879">
    <graphics y="383.80133116356683" z="0.0" x="66.15199642983544"/>
  </node>
  <node id="135873" label="TBX3" cy:nodeId="116610">
    <graphics y="2054.595093370598" z="0.0" x="-760.1491758266343"/>
  </node>
  <node id="135978" label="GFPT1" cy:nodeId="106882">
    <graphics y="-527.3831475961988" z="0.0" x="-187.3685895839585"/>
  </node>
  <node id="135876" label="TAT" cy:nodeId="116609">
    <graphics y="-910.9082330454175" z="0.0" x="799.9811723789321"/>
  </node>
  <node id="135899" label="PPARA" cy:nodeId="106881">
    <graphics y="-925.9832452524488" z="0.0" x="569.0881975254165"/>
  </node>
  <node id="135945" label="HK3" cy:nodeId="105859">
    <graphics y="1242.4204412709887" z="0.0" x="930.1083696445571"/>
  </node>
  <node id="135964" label="GATA6" cy:nodeId="105862">
    <graphics y="2045.2975164663012" z="0.0" x="-1657.9833051601304"/>
  </node>
  <node id="136054" label="CTBS" cy:nodeId="105869">
    <graphics y="-1093.37661683448" z="0.0" x="258.18896656838524"/>
  </node>
  <node id="135955" label="PIGO" cy:nodeId="105874">
    <graphics y="-653.4122003305738" z="0.0" x="218.10478382912743"/>
  </node>
  <node id="135950" label="TSTA3" cy:nodeId="105880">
    <graphics y="540.3025213491137" z="0.0" x="-802.8232709804429"/>
  </node>
  <node id="135951" label="HSF1" cy:nodeId="105879">
    <graphics y="489.68808043114495" z="0.0" x="-546.5791303554429"/>
  </node>
  <node id="135949" label="GPAA1" cy:nodeId="105881">
    <graphics y="550.30551207177" z="0.0" x="-681.7592451015366"/>
  </node>
  <node id="135946" label="IRF1" cy:nodeId="105887">
    <graphics y="1210.1693426381762" z="0.0" x="799.5372636875259"/>
  </node>
  <node id="135937" label="IRF8" cy:nodeId="105890">
    <graphics y="1515.3076483022387" z="0.0" x="743.7674882969009"/>
  </node>
  <node id="135938" label="IRF5" cy:nodeId="105889">
    <graphics y="-243.82379090674567" z="0.0" x="-671.7272626796616"/>
  </node>
  <node id="135936" label="JMJD6" cy:nodeId="105894">
    <graphics y="568.8244329702075" z="0.0" x="-213.25240916403664"/>
  </node>
  <node id="135919" label="MGAT5" cy:nodeId="105893">
    <graphics y="-1067.7209771860425" z="0.0" x="-0.23634165915382255"/>
  </node>
  <node id="135877" label="GBGT1" cy:nodeId="105897">
    <graphics y="1696.9608465444262" z="0.0" x="956.4441240390884"/>
  </node>
  <node id="135885" label="GNB1" cy:nodeId="105902">
    <graphics y="-501.73016297705817" z="0.0" x="677.1166093906509"/>
  </node>
  <node id="135971" label="B3GALNT2" cy:nodeId="105908">
    <graphics y="-190.3307794321363" z="0.0" x="-195.74560374411476"/>
  </node>
  <node id="136002" label="CHST13" cy:nodeId="105913">
    <graphics y="2045.2975164663012" z="0.0" x="-1258.849653426732"/>
  </node>
  <node id="135948" label="B4GALT2" cy:nodeId="105917">
    <graphics y="429.43685972801995" z="0.0" x="-761.7052900234116"/>
  </node>
  <node id="136048" label="ARID3A" cy:nodeId="107970">
    <graphics y="151.58876097313714" z="0.0" x="-254.79580516013039"/>
  </node>
  <node id="136007" label="NEU1" cy:nodeId="107971">
    <graphics y="466.6738592397387" z="0.0" x="-42.34015483054054"/>
  </node>
  <node id="135996" label="PIGX" cy:nodeId="107980">
    <graphics y="3.2035070668871413" z="0.0" x="-27.762304488743666"/>
  </node>
  <node id="135924" label="MXD3" cy:nodeId="105933">
    <graphics y="663.8319402944262" z="0.0" x="-503.6700727382554"/>
  </node>
  <node id="135993" label="RPN1" cy:nodeId="105936">
    <graphics y="308.68524229637933" z="0.0" x="-98.70466441306007"/>
  </node>
  <node id="135923" label="MYBL2" cy:nodeId="105935">
    <graphics y="259.6927496205981" z="0.0" x="-264.04134959372414"/>
  </node>
  <node id="135994" label="SLC35C2" cy:nodeId="107986">
    <graphics y="354.1007391225512" z="0.0" x="-391.92428416403664"/>
  </node>
  <node id="135959" label="HNF1B" cy:nodeId="107994">
    <graphics y="149.12191832176995" z="0.0" x="-1022.1505414882554"/>
  </node>
  <node id="135920" label="NFIC" cy:nodeId="105945">
    <graphics y="-867.2001641977613" z="0.0" x="92.67640667763817"/>
  </node>
  <node id="135962" label="HEYL" cy:nodeId="107993">
    <graphics y="1852.2562567006762" z="0.0" x="1235.2024858554946"/>
  </node>
  <node id="135872" label="HS6ST1" cy:nodeId="107996">
    <graphics y="2045.2975164663012" z="0.0" x="-859.7160016933335"/>
  </node>
  <node id="135957" label="HNF4A" cy:nodeId="107995">
    <graphics y="-819.9718927133863" z="0.0" x="405.166932876979"/>
  </node>
  <node id="135956" label="SLC35D1" cy:nodeId="105950">
    <graphics y="-844.3653253305738" z="0.0" x="536.8366411289321"/>
  </node>
  <node id="135911" label="NR5A2" cy:nodeId="105952">
    <graphics y="-652.8571466196363" z="0.0" x="-324.6014692226304"/>
  </node>
  <node id="135913" label="NR2F1" cy:nodeId="105951">
    <graphics y="-1176.1801446665113" z="0.0" x="739.2869585117446"/>
  </node>
  <node id="135981" label="PIGM" cy:nodeId="105954">
    <graphics y="-405.5849298227613" z="0.0" x="61.18161373940575"/>
  </node>
  <node id="136031" label="NANS" cy:nodeId="108002">
    <graphics y="567.502533556145" z="0.0" x="-323.97665232809914"/>
  </node>
  <node id="135976" label="SLC35A1" cy:nodeId="108001">
    <graphics y="-763.2990411508863" z="0.0" x="-342.56173533591164"/>
  </node>
  <node id="136041" label="SLC17A5" cy:nodeId="108005">
    <graphics y="-17.62622010596442" z="0.0" x="-463.5860883632554"/>
  </node>
  <node id="135926" label="DAD1" cy:nodeId="108008">
    <graphics y="850.4172064077075" z="0.0" x="-689.8654462734116"/>
  </node>
  <node id="136035" label="CHPF2" cy:nodeId="108007">
    <graphics y="69.23118651024652" z="0.0" x="-526.5633222499741"/>
  </node>
  <node id="135898" label="PPARG" cy:nodeId="105961">
    <graphics y="603.6110540639575" z="0.0" x="270.78759938088524"/>
  </node>
  <node id="135897" label="RAC3" cy:nodeId="105964">
    <graphics y="2054.595093370598" z="0.0" x="-959.7160016933335"/>
  </node>
</graph>
