# Supplementary material for: A systems-based framework to computationally describe putative transcription factors and signaling pathways regulating glycan biosynthesis
Source: publisher site journal article supplement (doi:10.3762/bjoc.17.119), 2021-07-22
Supplement: Additional file 2 [file 1860-5397-17-119-S2.cys › CytoscapeSession-2021_03_21-12_01/views/116985-128965-LUAD.xgmml]

<?xml version="1.0" encoding="UTF-8" standalone="yes"?>
<graph id="128965" label="LUAD" cy:view="1" cy:networkId="116985" cy:visualStyle="default" cy:rendererId="org.cytoscape.ding" cy:documentVersion="3.0" xmlns:dc="http://purl.org/dc/elements/1.1/" xmlns:xlink="http://www.w3.org/1999/xlink" xmlns:rdf="http://www.w3.org/1999/02/22-rdf-syntax-ns#" xmlns:cy="http://www.cytoscape.org" xmlns="http://www.cs.rpi.edu/XGMML">
  <graphics>
    <att name="NETWORK_NODE_SELECTION" value="true" type="string" cy:type="String"/>
    <att name="NETWORK_CENTER_X_LOCATION" value="177.44134521484375" type="string" cy:type="String"/>
    <att name="NETWORK_HEIGHT" value="510.0" type="string" cy:type="String"/>
    <att name="NETWORK_TITLE" value="LUAD" type="string" cy:type="String"/>
    <att name="NETWORK_EDGE_SELECTION" value="true" type="string" cy:type="String"/>
    <att name="NETWORK_CENTER_Y_LOCATION" value="-591.5684814453125" type="string" cy:type="String"/>
    <att name="NETWORK_WIDTH" value="1312.0" type="string" cy:type="String"/>
    <att name="NETWORK_DEPTH" value="0.0" type="string" cy:type="String"/>
    <att name="NETWORK_SCALE_FACTOR" value="0.08789551258544422" type="string" cy:type="String"/>
    <att name="NETWORK_ANNOTATION_SELECTION" value="false" type="string" cy:type="String"/>
    <att name="NETWORK_CENTER_Z_LOCATION" value="0.0" type="string" cy:type="String"/>
  </graphics>
  <node id="129056" label="NOTCH1" cy:nodeId="108016">
    <graphics y="1050.763506641561" z="0.0" x="735.4452261232357"/>
  </node>
  <node id="129038" label="RBBP5" cy:nodeId="105967">
    <graphics y="-494.45673871976715" z="0.0" x="321.81448881854817"/>
  </node>
  <node id="129034" label="REST" cy:nodeId="105970">
    <graphics y="262.64296220796723" z="0.0" x="-123.63936860332683"/>
  </node>
  <node id="129050" label="NR2F2" cy:nodeId="108017">
    <graphics y="1181.5775935556235" z="0.0" x="1388.7710317872982"/>
  </node>
  <node id="129031" label="RFX7" cy:nodeId="105974">
    <graphics y="-358.8449833486734" z="0.0" x="227.43148939838215"/>
  </node>
  <node id="129036" label="COG2" cy:nodeId="105973">
    <graphics y="-670.7669193838296" z="0.0" x="221.52728026141926"/>
  </node>
  <node id="129264" label="CAMTA2" cy:nodeId="111093">
    <graphics y="-1752.3162052725015" z="0.0" x="-269.89477021465495"/>
  </node>
  <node id="129035" label="RELA" cy:nodeId="108024">
    <graphics y="-360.8292820547281" z="0.0" x="-215.01305634746745"/>
  </node>
  <node id="129149" label="FPGT" cy:nodeId="105976">
    <graphics y="2124.7825057412924" z="0.0" x="-1427.1654611326237"/>
  </node>
  <node id="129028" label="RNF2" cy:nodeId="105975">
    <graphics y="-693.0862553213296" z="0.0" x="517.0921682619075"/>
  </node>
  <node id="129027" label="RUNX1" cy:nodeId="105978">
    <graphics y="460.788653125936" z="0.0" x="1355.5140737794857"/>
  </node>
  <node id="129095" label="ST8SIA2" cy:nodeId="105980">
    <graphics y="1692.2362849618735" z="0.0" x="936.2056020997982"/>
  </node>
  <node id="129209" label="SULF2" cy:nodeId="105979">
    <graphics y="1570.6193416024985" z="0.0" x="1042.2355093263607"/>
  </node>
  <node id="129025" label="RUNX2" cy:nodeId="105981">
    <graphics y="1707.0985896493735" z="0.0" x="1212.0196890138607"/>
  </node>
  <node id="129021" label="SIN3A" cy:nodeId="105984">
    <graphics y="-369.14353681547027" z="0.0" x="470.9615225099544"/>
  </node>
  <node id="129024" label="RXRA" cy:nodeId="105983">
    <graphics y="-2081.910321483439" z="0.0" x="-623.5584359861393"/>
  </node>
  <node id="128992" label="TCF21" cy:nodeId="108031">
    <graphics y="982.8488337899985" z="0.0" x="575.7349294923763"/>
  </node>
  <node id="129019" label="SIX5" cy:nodeId="105986">
    <graphics y="-2158.6577580068765" z="0.0" x="-382.61764008770183"/>
  </node>
  <node id="129097" label="HS3ST3A1" cy:nodeId="108033">
    <graphics y="1777.946367969686" z="0.0" x="849.6352285646419"/>
  </node>
  <node id="129014" label="SMC3" cy:nodeId="105990">
    <graphics y="-208.29306436521392" z="0.0" x="251.46987669696614"/>
  </node>
  <node id="129015" label="SMC1A" cy:nodeId="105989">
    <graphics y="-229.09976316434722" z="0.0" x="314.18250029315755"/>
  </node>
  <node id="128975" label="XBP1" cy:nodeId="108037">
    <graphics y="2001.656359424764" z="0.0" x="-1256.0901742673893"/>
  </node>
  <node id="129005" label="SRCAP" cy:nodeId="105994">
    <graphics y="-2540.3474552725015" z="0.0" x="-262.67540986309245"/>
  </node>
  <node id="129008" label="SPDEF" cy:nodeId="105993">
    <graphics y="1921.078692188436" z="0.0" x="-555.0826898313542"/>
  </node>
  <node id="129004" label="SREBF2" cy:nodeId="105995">
    <graphics y="-1842.861249217814" z="0.0" x="25.05600493182942"/>
  </node>
  <node id="129113" label="DDOST" cy:nodeId="108555">
    <graphics y="-864.4957096670328" z="0.0" x="-813.7016244627018"/>
  </node>
  <node id="129277" label="B3GALNT1" cy:nodeId="111115">
    <graphics y="398.19337724702973" z="0.0" x="678.0629019044857"/>
  </node>
  <node id="129093" label="PIGC" cy:nodeId="108558">
    <graphics y="1972.846026172811" z="0.0" x="-991.199602673151"/>
  </node>
  <node id="129274" label="GANAB" cy:nodeId="105998">
    <graphics y="-242.72419095975738" z="0.0" x="-183.3552804685612"/>
  </node>
  <node id="129003" label="SSRP1" cy:nodeId="105997">
    <graphics y="-461.82188154203277" z="0.0" x="-358.67977387676433"/>
  </node>
  <node id="129001" label="STAT1" cy:nodeId="105999">
    <graphics y="996.314776172811" z="0.0" x="40.71718352069661"/>
  </node>
  <node id="129229" label="GALE" cy:nodeId="108559">
    <graphics y="-1713.4346134756265" z="0.0" x="-1015.6691537595768"/>
  </node>
  <node id="128999" label="STAT4" cy:nodeId="106002">
    <graphics y="1300.722735157186" z="0.0" x="8.076802661321608"/>
  </node>
  <node id="128998" label="STAT5A" cy:nodeId="106003">
    <graphics y="1227.8651912118735" z="0.0" x="331.8714498781185"/>
  </node>
  <node id="128994" label="TAF1" cy:nodeId="106006">
    <graphics y="-105.01737714750152" z="0.0" x="171.32938163509175"/>
  </node>
  <node id="128990" label="TCF7" cy:nodeId="106008">
    <graphics y="1399.7209041024985" z="0.0" x="692.3340811037044"/>
  </node>
  <node id="129120" label="NAGA" cy:nodeId="108567">
    <graphics y="1194.1837947274985" z="0.0" x="-204.10012299785808"/>
  </node>
  <node id="128989" label="TCF7L1" cy:nodeId="106009">
    <graphics y="-2179.569745311564" z="0.0" x="-1038.5779672361393"/>
  </node>
  <node id="128974" label="ALG5" cy:nodeId="106012">
    <graphics y="1921.078692188436" z="0.0" x="-1185.0125985837956"/>
  </node>
  <node id="128988" label="TEAD1" cy:nodeId="106013">
    <graphics y="549.911455860311" z="0.0" x="322.29153959979817"/>
  </node>
  <node id="128987" label="TET2" cy:nodeId="106016">
    <graphics y="78.96278642671723" z="0.0" x="220.44345228900715"/>
  </node>
  <node id="129214" label="E2F8" cy:nodeId="108575">
    <graphics y="-277.0382664297281" z="0.0" x="-298.61217744121745"/>
  </node>
  <node id="128981" label="TRIM28" cy:nodeId="106018">
    <graphics y="-1020.2756168935953" z="0.0" x="-756.7923227048893"/>
  </node>
  <node id="129126" label="PIGL" cy:nodeId="108578">
    <graphics y="-1844.2060978506265" z="0.0" x="-422.69320161113933"/>
  </node>
  <node id="128983" label="TP63" cy:nodeId="106017">
    <graphics y="389.40187334077973" z="0.0" x="-695.1263681150456"/>
  </node>
  <node id="128980" label="TTF2" cy:nodeId="106019">
    <graphics y="-170.99601484281402" z="0.0" x="-83.25904328594402"/>
  </node>
  <node id="129176" label="EZH2" cy:nodeId="108582">
    <graphics y="-90.39400983793121" z="0.0" x="-725.1418100095768"/>
  </node>
  <node id="128979" label="USF1" cy:nodeId="106021">
    <graphics y="-1761.630780467814" z="0.0" x="669.3573660158138"/>
  </node>
  <node id="128976" label="WDR5" cy:nodeId="106024">
    <graphics y="-2284.6352970693765" z="0.0" x="-756.4496103025456"/>
  </node>
  <node id="128972" label="XRN2" cy:nodeId="106025">
    <graphics y="-353.41502119047027" z="0.0" x="724.7942861818294"/>
  </node>
  <node id="128971" label="YY1" cy:nodeId="106028">
    <graphics y="2082.2361018564047" z="0.0" x="-797.2355523801823"/>
  </node>
  <node id="129029" label="B3GALT4" cy:nodeId="106030">
    <graphics y="-1433.538495311564" z="0.0" x="-666.8611703611393"/>
  </node>
  <node id="128970" label="ZBTB17" cy:nodeId="106029">
    <graphics y="-1532.9888126943765" z="0.0" x="-617.0129037595768"/>
  </node>
  <node id="129153" label="GMEB2" cy:nodeId="108589">
    <graphics y="-1426.1128361318765" z="0.0" x="-24.766764233209642"/>
  </node>
  <node id="128968" label="ZBTB33" cy:nodeId="106031">
    <graphics y="-105.16152692777496" z="0.0" x="841.2501577638607"/>
  </node>
  <node id="129144" label="HDAC6" cy:nodeId="108593">
    <graphics y="-1013.9361393545328" z="0.0" x="-141.54091889629558"/>
  </node>
  <node id="129066" label="NCAPG" cy:nodeId="108602">
    <graphics y="-280.16904951078277" z="0.0" x="-807.3569589353581"/>
  </node>
  <node id="129072" label="MLLT1" cy:nodeId="108601">
    <graphics y="134.04152177827973" z="0.0" x="1397.4708608888607"/>
  </node>
  <node id="129032" label="CHST5" cy:nodeId="108612">
    <graphics y="1930.3762690927329" z="0.0" x="342.7514395021419"/>
  </node>
  <node id="129033" label="RFX2" cy:nodeId="108611">
    <graphics y="1921.078692188436" z="0.0" x="243.1846136354427"/>
  </node>
  <node id="129030" label="RING1" cy:nodeId="108613">
    <graphics y="-1466.300946483439" z="0.0" x="-521.6345468259831"/>
  </node>
  <node id="129022" label="SFMBT1" cy:nodeId="108615">
    <graphics y="-238.98035169584136" z="0.0" x="686.0140737794857"/>
  </node>
  <node id="129013" label="SNAPC1" cy:nodeId="108618">
    <graphics y="1921.078692188436" z="0.0" x="-655.0826898313542"/>
  </node>
  <node id="129235" label="CHD7" cy:nodeId="112217">
    <graphics y="-739.5860416982828" z="0.0" x="729.5422720216732"/>
  </node>
  <node id="128995" label="SUMO1" cy:nodeId="112231">
    <graphics y="1921.078692188436" z="0.0" x="-897.2355523801823"/>
  </node>
  <node id="129159" label="GATA3" cy:nodeId="109677">
    <graphics y="1113.3471248056235" z="0.0" x="363.26843779315755"/>
  </node>
  <node id="129092" label="LMNB1" cy:nodeId="109681">
    <graphics y="-136.08992506009918" z="0.0" x="-1028.0938363767643"/>
  </node>
  <node id="129039" label="XYLT2" cy:nodeId="109684">
    <graphics y="143.99196123140473" z="0.0" x="1813.3036245607357"/>
  </node>
  <node id="129187" label="ESRRA" cy:nodeId="110794">
    <graphics y="-1592.1348087881265" z="0.0" x="-1162.0631967283268"/>
  </node>
  <node id="129268" label="SGSH" cy:nodeId="110804">
    <graphics y="-1619.9744083975015" z="0.0" x="-355.1286874509831"/>
  </node>
  <node id="129297" label="ADNP" cy:nodeId="105684">
    <graphics y="1460.750323047811" z="0.0" x="-88.97072846660808"/>
  </node>
  <node id="129295" label="AFF4" cy:nodeId="105686">
    <graphics y="-162.016091594523" z="0.0" x="553.957280566595"/>
  </node>
  <node id="129054" label="NR0B2" cy:nodeId="110805">
    <graphics y="-3225.6760685537515" z="0.0" x="-761.2170053220768"/>
  </node>
  <node id="129296" label="FUT7" cy:nodeId="105685">
    <graphics y="1250.6488826181235" z="0.0" x="201.48359053363606"/>
  </node>
  <node id="129293" label="STT3B" cy:nodeId="105688">
    <graphics y="-288.0932819936929" z="0.0" x="486.02893584003255"/>
  </node>
  <node id="129294" label="MAN1A2" cy:nodeId="105687">
    <graphics y="-93.38654066068511" z="0.0" x="360.61868803729817"/>
  </node>
  <node id="129289" label="FUT11" cy:nodeId="105690">
    <graphics y="187.34086870210785" z="0.0" x="100.72127287616536"/>
  </node>
  <node id="129286" label="NEU3" cy:nodeId="105689">
    <graphics y="-252.96407438260894" z="0.0" x="181.54478304614827"/>
  </node>
  <node id="129284" label="COG5" cy:nodeId="105692">
    <graphics y="-68.10027814847808" z="0.0" x="-141.51473481426433"/>
  </node>
  <node id="129287" label="ACER2" cy:nodeId="105691">
    <graphics y="30.248949756795355" z="0.0" x="575.3491873048763"/>
  </node>
  <node id="129292" label="MAN2A1" cy:nodeId="105694">
    <graphics y="299.2161738778891" z="0.0" x="586.2674001955013"/>
  </node>
  <node id="129288" label="SLC35F5" cy:nodeId="105696">
    <graphics y="-35.64022565824371" z="0.0" x="427.3735098146419"/>
  </node>
  <node id="129178" label="GALNT10" cy:nodeId="105697">
    <graphics y="641.4359309579672" z="0.0" x="1230.1992544435482"/>
  </node>
  <node id="129130" label="RTF1" cy:nodeId="105700">
    <graphics y="-535.9824040029703" z="0.0" x="814.1384023927669"/>
  </node>
  <node id="129290" label="ATF2" cy:nodeId="105704">
    <graphics y="-98.29362226468902" z="0.0" x="278.75913756122395"/>
  </node>
  <node id="129285" label="UGGT1" cy:nodeId="105705">
    <graphics y="-432.2561619375406" z="0.0" x="170.72704451312825"/>
  </node>
  <node id="129175" label="B3GNT5" cy:nodeId="105707">
    <graphics y="62.284167041951605" z="0.0" x="-675.4958749509831"/>
  </node>
  <node id="129281" label="ATF7IP" cy:nodeId="105710">
    <graphics y="-70.62333417875152" z="0.0" x="-529.2031503416081"/>
  </node>
  <node id="129207" label="HAS2" cy:nodeId="105709">
    <graphics y="1470.904864063436" z="0.0" x="1070.590550830267"/>
  </node>
  <node id="129282" label="ALG10" cy:nodeId="105711">
    <graphics y="-224.7884705160318" z="0.0" x="-421.6449228025456"/>
  </node>
  <node id="129280" label="BACH1" cy:nodeId="105714">
    <graphics y="385.763750782186" z="0.0" x="468.37784331073567"/>
  </node>
  <node id="129060" label="FKTN" cy:nodeId="105713">
    <graphics y="-74.26154829007965" z="0.0" x="513.8687795900325"/>
  </node>
  <node id="129181" label="MAN1A1" cy:nodeId="105716">
    <graphics y="956.918535938436" z="0.0" x="376.7067617677669"/>
  </node>
  <node id="129279" label="CSGALNACT2" cy:nodeId="105715">
    <graphics y="715.6693904306235" z="0.0" x="267.99490874042317"/>
  </node>
  <node id="129185" label="CHST11" cy:nodeId="105718">
    <graphics y="1048.2162654306235" z="0.0" x="238.42043822040364"/>
  </node>
  <node id="129210" label="CHSY1" cy:nodeId="105717">
    <graphics y="808.1445491220297" z="0.0" x="580.1581777833919"/>
  </node>
  <node id="129183" label="GFPT2" cy:nodeId="105719">
    <graphics y="732.0280940439047" z="0.0" x="15.200612475774733"/>
  </node>
  <node id="128978" label="DPM3" cy:nodeId="105722">
    <graphics y="-1865.2268498037515" z="0.0" x="766.1011709474544"/>
  </node>
  <node id="129090" label="MGAT1" cy:nodeId="105724">
    <graphics y="1458.672198047811" z="0.0" x="278.4692358278255"/>
  </node>
  <node id="129276" label="BRCA1" cy:nodeId="105728">
    <graphics y="-392.90209699613433" z="0.0" x="-527.8750253416081"/>
  </node>
  <node id="129052" label="ALG10B" cy:nodeId="105727">
    <graphics y="263.522295704061" z="0.0" x="388.22563688983723"/>
  </node>
  <node id="129275" label="PIGW" cy:nodeId="105729">
    <graphics y="-349.00219465238433" z="0.0" x="-438.7909188962956"/>
  </node>
  <node id="129059" label="NKX2-1" cy:nodeId="116995">
    <graphics y="-2863.2134220693765" z="0.0" x="-797.5107064939518"/>
  </node>
  <node id="129291" label="FAM20B" cy:nodeId="105731">
    <graphics y="-525.5246403310953" z="0.0" x="511.0857900880794"/>
  </node>
  <node id="129270" label="ALG12" cy:nodeId="105734">
    <graphics y="-1718.1650822256265" z="0.0" x="-63.965265820123705"/>
  </node>
  <node id="129271" label="BRD1" cy:nodeId="105733">
    <graphics y="-1506.9983341787515" z="0.0" x="-221.04360444317058"/>
  </node>
  <node id="129105" label="CTNS" cy:nodeId="114952">
    <graphics y="-1864.565106639689" z="0.0" x="-775.5922494627018"/>
  </node>
  <node id="129057" label="PMM1" cy:nodeId="105735">
    <graphics y="-2943.4224064443765" z="0.0" x="-711.0550790525456"/>
  </node>
  <node id="129267" label="BRD2" cy:nodeId="107276">
    <graphics y="-1030.5827457998453" z="0.0" x="-446.64242036113933"/>
  </node>
  <node id="129174" label="CMAS" cy:nodeId="105742">
    <graphics y="-51.01345563871246" z="0.0" x="-927.6073861814518"/>
  </node>
  <node id="129196" label="FUT10" cy:nodeId="107278">
    <graphics y="-520.1325504873453" z="0.0" x="1287.8539175294857"/>
  </node>
  <node id="129263" label="CBX3" cy:nodeId="105741">
    <graphics y="-286.2336857412515" z="0.0" x="-1121.7823129392643"/>
  </node>
  <node id="129265" label="BRD3" cy:nodeId="107277">
    <graphics y="-588.9798710439859" z="0.0" x="619.8985952638607"/>
  </node>
  <node id="129251" label="RFNG" cy:nodeId="105744">
    <graphics y="-1365.5732853506265" z="0.0" x="-943.1325326658268"/>
  </node>
  <node id="129260" label="CBX4" cy:nodeId="105743">
    <graphics y="-1532.5906193350015" z="0.0" x="-79.10029084453777"/>
  </node>
  <node id="129222" label="DNMT3A" cy:nodeId="107282">
    <graphics y="-1309.694257030314" z="0.0" x="236.10246794452473"/>
  </node>
  <node id="129257" label="ST6GALNAC6" cy:nodeId="105746">
    <graphics y="1202.326494922811" z="0.0" x="647.6294912599544"/>
  </node>
  <node id="129258" label="CBX7" cy:nodeId="105745">
    <graphics y="1376.466631641561" z="0.0" x="579.99951689472"/>
  </node>
  <node id="129217" label="E2F3" cy:nodeId="107284">
    <graphics y="-513.754315624064" z="0.0" x="-222.47493989238933"/>
  </node>
  <node id="129269" label="MAN2A2" cy:nodeId="105748">
    <graphics y="-1075.3200504873453" z="0.0" x="-257.7052560544987"/>
  </node>
  <node id="129062" label="ST3GAL3" cy:nodeId="105747">
    <graphics y="1921.078692188436" z="0.0" x="-155.94903809795574"/>
  </node>
  <node id="129199" label="MGAT3" cy:nodeId="105750">
    <graphics y="1064.3376033212485" z="0.0" x="542.4981130861263"/>
  </node>
  <node id="128996" label="IDUA" cy:nodeId="105749">
    <graphics y="1930.3762690927329" z="0.0" x="-255.94903809795574"/>
  </node>
  <node id="129007" label="FUT6" cy:nodeId="107288">
    <graphics y="1930.3762690927329" z="0.0" x="-455.51586396465495"/>
  </node>
  <node id="129252" label="CBX8" cy:nodeId="105752">
    <graphics y="-1348.084149608439" z="0.0" x="-1220.2719369627018"/>
  </node>
  <node id="129249" label="B3GAT3" cy:nodeId="105754">
    <graphics y="-1432.745282420939" z="0.0" x="-1016.5823617673893"/>
  </node>
  <node id="129250" label="GALK1" cy:nodeId="105753">
    <graphics y="-1469.218915233439" z="0.0" x="-1431.3825326658268"/>
  </node>
  <node id="129245" label="CDK8" cy:nodeId="105756">
    <graphics y="-178.0433018301187" z="0.0" x="-554.5435434080143"/>
  </node>
  <node id="129169" label="FOSL1" cy:nodeId="107294">
    <graphics y="441.85292314546723" z="0.0" x="-378.73385102520183"/>
  </node>
  <node id="129243" label="DPM2" cy:nodeId="105758">
    <graphics y="-2505.2080509756265" z="0.0" x="-735.9018808103581"/>
  </node>
  <node id="129191" label="HK1" cy:nodeId="107293">
    <graphics y="104.21193193452973" z="0.0" x="455.77286284198567"/>
  </node>
  <node id="129244" label="CDK9" cy:nodeId="105757">
    <graphics y="-2261.8860294912515" z="0.0" x="-618.7782235837956"/>
  </node>
  <node id="129241" label="MAN1B1" cy:nodeId="105760">
    <graphics y="-2395.8672306631265" z="0.0" x="-576.1785531736393"/>
  </node>
  <node id="129242" label="PIGQ" cy:nodeId="105759">
    <graphics y="-1823.6560490225015" z="0.0" x="-580.2218270994206"/>
  </node>
  <node id="129168" label="FOXK1" cy:nodeId="107298">
    <graphics y="264.5470759774985" z="0.0" x="1445.3176626466732"/>
  </node>
  <node id="129259" label="MOGS" cy:nodeId="105762">
    <graphics y="-1387.8462345693765" z="0.0" x="-183.97973115215495"/>
  </node>
  <node id="129104" label="POMT1" cy:nodeId="105761">
    <graphics y="-1963.870526561564" z="0.0" x="-689.8102670408268"/>
  </node>
  <node id="128969" label="CHST12" cy:nodeId="105763">
    <graphics y="-1633.505780467814" z="0.0" x="-604.5898690916081"/>
  </node>
  <node id="129147" label="GTF3C2" cy:nodeId="107302">
    <graphics y="-1719.018964061564" z="0.0" x="505.7353262208919"/>
  </node>
  <node id="129256" label="MFNG" cy:nodeId="105766">
    <graphics y="1200.925127735311" z="0.0" x="509.0831960939388"/>
  </node>
  <node id="129128" label="NAGK" cy:nodeId="105765">
    <graphics y="1434.717364063436" z="0.0" x="174.00124304523274"/>
  </node>
  <node id="129238" label="CHD2" cy:nodeId="105770">
    <graphics y="-439.79255414945465" z="0.0" x="-25.275675366022142"/>
  </node>
  <node id="129240" label="CHD1" cy:nodeId="105769">
    <graphics y="281.59254716890473" z="0.0" x="838.5679678224544"/>
  </node>
  <node id="129236" label="NDST2" cy:nodeId="105772">
    <graphics y="246.8560664560141" z="0.0" x="189.12877409686848"/>
  </node>
  <node id="129237" label="OGT" cy:nodeId="105771">
    <graphics y="-338.89602399808746" z="0.0" x="69.68569700946614"/>
  </node>
  <node id="129121" label="NAAA" cy:nodeId="107310">
    <graphics y="1086.3632380868735" z="0.0" x="80.75921385516926"/>
  </node>
  <node id="129234" label="CHD8" cy:nodeId="105774">
    <graphics y="-506.6744511221109" z="0.0" x="131.4928297304134"/>
  </node>
  <node id="129115" label="KAT2B" cy:nodeId="107312">
    <graphics y="1295.582598438436" z="0.0" x="308.44022124042317"/>
  </node>
  <node id="129118" label="JARID2" cy:nodeId="107311">
    <graphics y="-558.2315189932046" z="0.0" x="385.46602385272786"/>
  </node>
  <node id="129107" label="KDM5C" cy:nodeId="107314">
    <graphics y="-973.2092716787515" z="0.0" x="-252.1820626951237"/>
  </node>
  <node id="129202" label="GAL3ST4" cy:nodeId="105778">
    <graphics y="958.218340625936" z="0.0" x="171.5730652116756"/>
  </node>
  <node id="129111" label="KDM2B" cy:nodeId="107313">
    <graphics y="-1108.234540233439" z="0.0" x="-73.69291169414714"/>
  </node>
  <node id="129162" label="MAN2B1" cy:nodeId="105777">
    <graphics y="1300.5204646493735" z="0.0" x="395.53189604511067"/>
  </node>
  <node id="129102" label="KLF11" cy:nodeId="107316">
    <graphics y="305.5218379403891" z="0.0" x="-567.0167489744206"/>
  </node>
  <node id="129232" label="CPSF3L" cy:nodeId="105780">
    <graphics y="-1665.9397404287515" z="0.0" x="-863.6798959470768"/>
  </node>
  <node id="129106" label="KDM6B" cy:nodeId="107315">
    <graphics y="-1760.584149608439" z="0.0" x="-685.3215585447331"/>
  </node>
  <node id="129204" label="DSE" cy:nodeId="105779">
    <graphics y="1080.4528376962485" z="0.0" x="10.32120268573567"/>
  </node>
  <node id="129100" label="KLF4" cy:nodeId="107317">
    <graphics y="1535.3983943368735" z="0.0" x="1255.4331411622982"/>
  </node>
  <node id="129231" label="B3GALT6" cy:nodeId="105781">
    <graphics y="-1556.937176952189" z="0.0" x="-797.8891244627018"/>
  </node>
  <node id="129228" label="POMGNT1" cy:nodeId="105783">
    <graphics y="-1814.4155705068765" z="0.0" x="-959.8357797361393"/>
  </node>
  <node id="129094" label="LIN9" cy:nodeId="107321">
    <graphics y="2024.5302913095297" z="0.0" x="-1085.0125985837956"/>
  </node>
  <node id="129227" label="CREB1" cy:nodeId="105785">
    <graphics y="345.37550615327973" z="0.0" x="-32.72361237774089"/>
  </node>
  <node id="129079" label="MED12" cy:nodeId="107324">
    <graphics y="-1153.8784611318765" z="0.0" x="-334.89937836895183"/>
  </node>
  <node id="129226" label="CREBBP" cy:nodeId="105790">
    <graphics y="71.1207148935141" z="0.0" x="898.9396719240169"/>
  </node>
  <node id="129220" label="B4GALT3" cy:nodeId="105789">
    <graphics y="-1591.112225780314" z="0.0" x="507.9599355958919"/>
  </node>
  <node id="129218" label="POFUT1" cy:nodeId="105792">
    <graphics y="-645.1845524404703" z="0.0" x="-433.63363129863933"/>
  </node>
  <node id="129143" label="POFUT2" cy:nodeId="107327">
    <graphics y="-1300.3962833975015" z="0.0" x="-331.1814218259831"/>
  </node>
  <node id="129155" label="COG7" cy:nodeId="105791">
    <graphics y="-2419.0640080068765" z="0.0" x="-239.52578217754558"/>
  </node>
  <node id="129219" label="E2F1" cy:nodeId="105796">
    <graphics y="-526.0335209463296" z="0.0" x="-516.0227914548893"/>
  </node>
  <node id="129223" label="DEK" cy:nodeId="105795">
    <graphics y="-82.2244770620523" z="0.0" x="-358.1803231931706"/>
  </node>
  <node id="129046" label="PHF8" cy:nodeId="107334">
    <graphics y="-558.651532420939" z="0.0" x="11.586598803899733"/>
  </node>
  <node id="129248" label="SLC35B1" cy:nodeId="105798">
    <graphics y="-1316.4863712881265" z="0.0" x="-1379.8199105955143"/>
  </node>
  <node id="129049" label="NRF1" cy:nodeId="107333">
    <graphics y="-2082.3984806631265" z="0.0" x="-774.0824228025456"/>
  </node>
  <node id="129166" label="ALG3" cy:nodeId="105797">
    <graphics y="-678.1745426748453" z="0.0" x="-1036.4394174314518"/>
  </node>
  <node id="129044" label="PML" cy:nodeId="107336">
    <graphics y="1210.6735408212485" z="0.0" x="62.909787585638014"/>
  </node>
  <node id="129262" label="DPM1" cy:nodeId="105799">
    <graphics y="-364.71557355863433" z="0.0" x="-1046.5461068845768"/>
  </node>
  <node id="129213" label="EBF1" cy:nodeId="105804">
    <graphics y="1305.303789844686" z="0.0" x="878.0042471193294"/>
  </node>
  <node id="129023" label="SETDB1" cy:nodeId="107339">
    <graphics y="-1591.0674259756265" z="0.0" x="636.6036123537044"/>
  </node>
  <node id="129201" label="ST3GAL2" cy:nodeId="105806">
    <graphics y="1234.589190235311" z="0.0" x="261.0875982545833"/>
  </node>
  <node id="129018" label="SMAD1" cy:nodeId="107341">
    <graphics y="730.153887500936" z="0.0" x="764.3357290529232"/>
  </node>
  <node id="129212" label="CSGALNACT1" cy:nodeId="105805">
    <graphics y="1312.9655330087485" z="0.0" x="1122.2475942872982"/>
  </node>
  <node id="129016" label="SMARCC1" cy:nodeId="107344">
    <graphics y="-594.4738895986734" z="0.0" x="741.0535024904232"/>
  </node>
  <node id="129017" label="SMARCA4" cy:nodeId="107343">
    <graphics y="181.72694658296723" z="0.0" x="1612.1854604982357"/>
  </node>
  <node id="129026" label="CHST3" cy:nodeId="105807">
    <graphics y="528.6148860360922" z="0.0" x="1478.3472036622982"/>
  </node>
  <node id="129009" label="SP2" cy:nodeId="107346">
    <graphics y="-893.021649608439" z="0.0" x="-537.1499276853581"/>
  </node>
  <node id="129011" label="SOX2" cy:nodeId="107345">
    <graphics y="-2195.9453556631265" z="0.0" x="-1181.7251840330143"/>
  </node>
  <node id="128997" label="STAT6" cy:nodeId="107348">
    <graphics y="1921.078692188436" z="0.0" x="-355.51586396465495"/>
  </node>
  <node id="129000" label="STAT3" cy:nodeId="107347">
    <graphics y="-174.4256718252359" z="0.0" x="448.32935087909505"/>
  </node>
  <node id="129253" label="ST3GAL6" cy:nodeId="105811">
    <graphics y="1596.2514216806235" z="0.0" x="666.1130728029232"/>
  </node>
  <node id="128967" label="LAMP2" cy:nodeId="107350">
    <graphics y="-136.19639326078277" z="0.0" x="1020.8465933107357"/>
  </node>
  <node id="129278" label="B3GNT2" cy:nodeId="106838">
    <graphics y="463.06947587984223" z="0.0" x="561.3538259767513"/>
  </node>
  <node id="129086" label="TPST2" cy:nodeId="106840">
    <graphics y="1658.5487849618735" z="0.0" x="336.00826018085286"/>
  </node>
  <node id="129205" label="EGR2" cy:nodeId="105816">
    <graphics y="1113.627764454061" z="0.0" x="263.0728277467708"/>
  </node>
  <node id="129211" label="ST6GALNAC3" cy:nodeId="105815">
    <graphics y="1224.949053516561" z="0.0" x="831.7275137208919"/>
  </node>
  <node id="128977" label="VDR" cy:nodeId="107356">
    <graphics y="617.600664844686" z="0.0" x="1395.2528433107357"/>
  </node>
  <node id="129225" label="SLC35E1" cy:nodeId="106844">
    <graphics y="247.49092363374848" z="0.0" x="1298.6216177247982"/>
  </node>
  <node id="128986" label="TFCP2" cy:nodeId="107355">
    <graphics y="-1015.7546207998453" z="0.0" x="-566.7167001462956"/>
  </node>
  <node id="129198" label="ELF1" cy:nodeId="105822">
    <graphics y="-399.57383466703277" z="0.0" x="1171.7123159669857"/>
  </node>
  <node id="129246" label="CDK12" cy:nodeId="106848">
    <graphics y="-156.5729420278726" z="0.0" x="-269.68798310527995"/>
  </node>
  <node id="129283" label="COG6" cy:nodeId="105824">
    <graphics y="-268.01565290433746" z="0.0" x="831.9398550294857"/>
  </node>
  <node id="129197" label="COG3" cy:nodeId="105823">
    <graphics y="-392.43418622953277" z="0.0" x="1331.8634390138607"/>
  </node>
  <node id="129195" label="ELK3" cy:nodeId="105826">
    <graphics y="566.046221485311" z="0.0" x="51.59116118182942"/>
  </node>
  <node id="129224" label="DCP1A" cy:nodeId="106850">
    <graphics y="-430.20664716703277" z="0.0" x="627.3010916017513"/>
  </node>
  <node id="129233" label="CLOCK" cy:nodeId="106849">
    <graphics y="224.9254023935141" z="0.0" x="-11.544382641412767"/>
  </node>
  <node id="129194" label="ELL" cy:nodeId="105828">
    <graphics y="1478.3644587899985" z="0.0" x="32.78886931171223"/>
  </node>
  <node id="129192" label="ERCC6" cy:nodeId="105830">
    <graphics y="116.82936357515473" z="0.0" x="358.04924528827473"/>
  </node>
  <node id="129206" label="XYLT1" cy:nodeId="106854">
    <graphics y="1249.039141407186" z="0.0" x="731.3484854005794"/>
  </node>
  <node id="129188" label="MAN1C1" cy:nodeId="106853">
    <graphics y="1049.3878962899985" z="0.0" x="416.7498525880794"/>
  </node>
  <node id="129193" label="EP400" cy:nodeId="105829">
    <graphics y="-1218.1356022451578" z="0.0" x="-101.70934540996745"/>
  </node>
  <node id="129190" label="ERG" cy:nodeId="105832">
    <graphics y="1127.6684138681235" z="0.0" x="585.13721220722"/>
  </node>
  <node id="129254" label="FUCA1" cy:nodeId="106856">
    <graphics y="1496.043780079061" z="0.0" x="510.7840017580013"/>
  </node>
  <node id="129123" label="ST6GAL1" cy:nodeId="106855">
    <graphics y="1674.2943904306235" z="0.0" x="492.31543486347005"/>
  </node>
  <node id="129132" label="ST8SIA4" cy:nodeId="105834">
    <graphics y="840.0658748056235" z="0.0" x="224.06678908099934"/>
  </node>
  <node id="129157" label="GCNT4" cy:nodeId="106858">
    <graphics y="1011.7201716806235" z="0.0" x="963.4376577638607"/>
  </node>
  <node id="129058" label="ST3GAL5" cy:nodeId="106857">
    <graphics y="-2913.6736271475015" z="0.0" x="-907.0032602048893"/>
  </node>
  <node id="128991" label="UST" cy:nodeId="105836">
    <graphics y="886.2929255868735" z="0.0" x="730.4507192872982"/>
  </node>
  <node id="129164" label="SULT1C4" cy:nodeId="105837">
    <graphics y="1172.1129939462485" z="0.0" x="1206.8224233888607"/>
  </node>
  <node id="129255" label="ST8SIA1" cy:nodeId="105840">
    <graphics y="1194.7509333993735" z="0.0" x="400.38753264179036"/>
  </node>
  <node id="129272" label="GPI" cy:nodeId="106864">
    <graphics y="-620.6392948721109" z="0.0" x="-831.4294076658268"/>
  </node>
  <node id="129160" label="GAPDH" cy:nodeId="106863">
    <graphics y="-599.4084599111734" z="0.0" x="-948.9024301267643"/>
  </node>
  <node id="129186" label="ETS1" cy:nodeId="105839">
    <graphics y="857.9723689462485" z="0.0" x="388.28572600116536"/>
  </node>
  <node id="129180" label="ETV1" cy:nodeId="105842">
    <graphics y="754.7937190439047" z="0.0" x="1472.3589224122982"/>
  </node>
  <node id="129170" label="HS3ST3B1" cy:nodeId="105841">
    <graphics y="1073.259844532186" z="0.0" x="310.493153979681"/>
  </node>
  <node id="129012" label="MGAT2" cy:nodeId="106868">
    <graphics y="2001.656359424764" z="0.0" x="-726.1602655149479"/>
  </node>
  <node id="129096" label="ARSB" cy:nodeId="105843">
    <graphics y="1715.9384333993735" z="0.0" x="1060.3038687013607"/>
  </node>
  <node id="129140" label="HIF1A" cy:nodeId="106867">
    <graphics y="565.6928889657797" z="0.0" x="660.1675466798763"/>
  </node>
  <node id="129136" label="HOXB4" cy:nodeId="106870">
    <graphics y="1582.945391407186" z="0.0" x="78.11033385028645"/>
  </node>
  <node id="129177" label="EZH1" cy:nodeId="105846">
    <graphics y="-7.63615156156402" z="0.0" x="109.32674925555989"/>
  </node>
  <node id="129073" label="SLC35B4" cy:nodeId="105845">
    <graphics y="925.9577205087485" z="0.0" x="-162.46569306621745"/>
  </node>
  <node id="129127" label="IRF3" cy:nodeId="106872">
    <graphics y="-1699.4512150381265" z="0.0" x="-502.8922372556706"/>
  </node>
  <node id="129172" label="FLI1" cy:nodeId="105848">
    <graphics y="953.7680232431235" z="0.0" x="299.0128378175716"/>
  </node>
  <node id="129173" label="FANCD2" cy:nodeId="105847">
    <graphics y="-300.3149082754312" z="0.0" x="-603.9327035642643"/>
  </node>
  <node id="129085" label="MAF" cy:nodeId="106876">
    <graphics y="957.585772266561" z="0.0" x="241.74705260028645"/>
  </node>
  <node id="129099" label="LEF1" cy:nodeId="106875">
    <graphics y="1565.7440974618735" z="0.0" x="900.5667471193294"/>
  </node>
  <node id="129138" label="GAL3ST1" cy:nodeId="116603">
    <graphics y="-3417.2170841787515" z="0.0" x="-942.1569467283268"/>
  </node>
  <node id="128973" label="RPN2" cy:nodeId="105854">
    <graphics y="2082.2361018564047" z="0.0" x="-1327.1654611326237"/>
  </node>
  <node id="129075" label="MEIS3" cy:nodeId="106878">
    <graphics y="1556.7448298837485" z="0.0" x="194.58419745197102"/>
  </node>
  <node id="129167" label="FOXM1" cy:nodeId="105853">
    <graphics y="-413.3434727285562" z="0.0" x="-716.5952401853581"/>
  </node>
  <node id="129165" label="FOXO1" cy:nodeId="105856">
    <graphics y="1285.6576716806235" z="0.0" x="1262.1388296388607"/>
  </node>
  <node id="129261" label="GNPNAT1" cy:nodeId="105855">
    <graphics y="-309.5583698843179" z="0.0" x="-956.7093148923893"/>
  </node>
  <node id="129163" label="FOXP3" cy:nodeId="105858">
    <graphics y="1173.898516407186" z="0.0" x="273.0460409425716"/>
  </node>
  <node id="129040" label="RARA" cy:nodeId="106884">
    <graphics y="120.50294755952973" z="0.0" x="1950.1660513185482"/>
  </node>
  <node id="129200" label="NPL" cy:nodeId="105860">
    <graphics y="1307.374590625936" z="0.0" x="162.17020552387044"/>
  </node>
  <node id="129098" label="SULF1" cy:nodeId="106883">
    <graphics y="1821.078692188436" z="0.0" x="982.1512808107357"/>
  </node>
  <node id="129171" label="HK3" cy:nodeId="105859">
    <graphics y="1181.422930469686" z="0.0" x="167.23008318772122"/>
  </node>
  <node id="129158" label="GATA6" cy:nodeId="105862">
    <graphics y="1112.2419001962485" z="0.0" x="861.4593252443294"/>
  </node>
  <node id="129020" label="SIRT6" cy:nodeId="106885">
    <graphics y="-1293.856854686564" z="0.0" x="-1043.6784311033268"/>
  </node>
  <node id="129161" label="GABPA" cy:nodeId="105861">
    <graphics y="659.5069758798422" z="0.0" x="160.20768778552815"/>
  </node>
  <node id="129006" label="SPIB" cy:nodeId="106888">
    <graphics y="1143.777422657186" z="0.0" x="442.2581228517513"/>
  </node>
  <node id="128985" label="THAP11" cy:nodeId="106890">
    <graphics y="2224.7825057412924" z="0.0" x="-1595.2832895017643"/>
  </node>
  <node id="129156" label="GLYR1" cy:nodeId="105866">
    <graphics y="-2569.9504826162515" z="0.0" x="-109.07998139629558"/>
  </node>
  <node id="128993" label="TBX21" cy:nodeId="106889">
    <graphics y="1190.9396541024985" z="0.0" x="-27.21718842754558"/>
  </node>
  <node id="129152" label="GTF2B" cy:nodeId="105868">
    <graphics y="2027.6396815683188" z="0.0" x="-1485.1231027341862"/>
  </node>
  <node id="129215" label="COG4" cy:nodeId="106892">
    <graphics y="1930.3762690927329" z="0.0" x="143.1846136354427"/>
  </node>
  <node id="128984" label="COG8" cy:nodeId="106891">
    <graphics y="2234.0800826455893" z="0.0" x="-1495.716463635065"/>
  </node>
  <node id="129154" label="ALG1" cy:nodeId="105867">
    <graphics y="-2681.0898869131265" z="0.0" x="-34.04444367656902"/>
  </node>
  <node id="129002" label="STT3A" cy:nodeId="106893">
    <graphics y="-577.3372624014078" z="0.0" x="-339.3594003416081"/>
  </node>
  <node id="129150" label="CTBS" cy:nodeId="105869">
    <graphics y="1921.078692188436" z="0.0" x="-1439.8400521970768"/>
  </node>
  <node id="129146" label="H2AFX" cy:nodeId="105872">
    <graphics y="-1131.1944401357828" z="0.0" x="-949.8094125486393"/>
  </node>
  <node id="129148" label="GTF2I" cy:nodeId="105871">
    <graphics y="52.63264726656098" z="0.0" x="-290.82604462871745"/>
  </node>
  <node id="129266" label="PIGO" cy:nodeId="105874">
    <graphics y="-920.3541081045328" z="0.0" x="-428.4273935056706"/>
  </node>
  <node id="129145" label="HCFC1" cy:nodeId="105873">
    <graphics y="-778.6587956045328" z="0.0" x="-225.65346772442058"/>
  </node>
  <node id="129141" label="HES4" cy:nodeId="105876">
    <graphics y="-1447.0791447256265" z="0.0" x="-1595.2832895017643"/>
  </node>
  <node id="129142" label="HECTD1" cy:nodeId="105875">
    <graphics y="-693.8666508291421" z="0.0" x="629.4748892091732"/>
  </node>
  <node id="129134" label="TSTA3" cy:nodeId="105880">
    <graphics y="-1011.1835758779703" z="0.0" x="-1299.4132943845768"/>
  </node>
  <node id="129135" label="HSF1" cy:nodeId="105879">
    <graphics y="-1049.7944767568765" z="0.0" x="-1145.0678354002018"/>
  </node>
  <node id="129133" label="IKZF1" cy:nodeId="105882">
    <graphics y="1015.4318416024985" z="0.0" x="300.9982656740169"/>
  </node>
  <node id="129247" label="GPAA1" cy:nodeId="105881">
    <graphics y="-1186.7573063467203" z="0.0" x="-1242.7381234861393"/>
  </node>
  <node id="129184" label="LIPA" cy:nodeId="105884">
    <graphics y="976.117022266561" z="0.0" x="463.13977568378255"/>
  </node>
  <node id="129203" label="GM2A" cy:nodeId="105883">
    <graphics y="1082.967119922811" z="0.0" x="192.32296126117512"/>
  </node>
  <node id="129131" label="INO80" cy:nodeId="105885">
    <graphics y="-634.6497318838296" z="0.0" x="977.2333120607357"/>
  </node>
  <node id="129124" label="IRF4" cy:nodeId="105888">
    <graphics y="1401.9357478524985" z="0.0" x="443.97644560565755"/>
  </node>
  <node id="129129" label="IRF1" cy:nodeId="105887">
    <graphics y="1335.8925349618735" z="0.0" x="93.54565184345051"/>
  </node>
  <node id="129119" label="IRF8" cy:nodeId="105890">
    <graphics y="1013.9262263681235" z="0.0" x="133.8720793031673"/>
  </node>
  <node id="129122" label="IRF5" cy:nodeId="105889">
    <graphics y="1151.5180232431235" z="0.0" x="110.19440977802083"/>
  </node>
  <node id="129117" label="JMJD1C" cy:nodeId="105892">
    <graphics y="288.5955684091391" z="0.0" x="288.25676481952473"/>
  </node>
  <node id="129116" label="JMJD6" cy:nodeId="105894">
    <graphics y="-1461.713544139689" z="0.0" x="-1256.3100229002018"/>
  </node>
  <node id="129182" label="MGAT5" cy:nodeId="105893">
    <graphics y="242.86805986421723" z="0.0" x="521.3699087404232"/>
  </node>
  <node id="129125" label="FKRP" cy:nodeId="105896">
    <graphics y="-1352.427655467814" z="0.0" x="-593.6116586423893"/>
  </node>
  <node id="129087" label="GBGT1" cy:nodeId="105897">
    <graphics y="1695.709307422811" z="0.0" x="219.9853071474056"/>
  </node>
  <node id="129112" label="GNB1" cy:nodeId="105902">
    <graphics y="-787.7629826162515" z="0.0" x="-895.3472543455143"/>
  </node>
  <node id="129114" label="KDM1A" cy:nodeId="105901">
    <graphics y="-765.791180858439" z="0.0" x="-725.3419442869206"/>
  </node>
  <node id="129109" label="KDM5A" cy:nodeId="105904">
    <graphics y="-328.98106122953277" z="0.0" x="-55.78849274883464"/>
  </node>
  <node id="129221" label="B3GALNT2" cy:nodeId="105908">
    <graphics y="-882.7617619131265" z="0.0" x="302.45732634296223"/>
  </node>
  <node id="129108" label="KDM5B" cy:nodeId="105907">
    <graphics y="-660.3970158193765" z="0.0" x="327.7422994874935"/>
  </node>
  <node id="129091" label="LMO2" cy:nodeId="105909">
    <graphics y="1344.0329158212485" z="0.0" x="230.15136854877278"/>
  </node>
  <node id="129088" label="RENBP" cy:nodeId="105912">
    <graphics y="1498.777178516561" z="0.0" x="367.80371611347005"/>
  </node>
  <node id="129089" label="LYL1" cy:nodeId="105911">
    <graphics y="1375.496416797811" z="0.0" x="310.492421557806"/>
  </node>
  <node id="129083" label="MAFB" cy:nodeId="105914">
    <graphics y="1278.292559375936" z="0.0" x="-102.26082856426433"/>
  </node>
  <node id="129010" label="ST6GALNAC1" cy:nodeId="105920">
    <graphics y="-2290.5862248037515" z="0.0" x="-1288.1310678220768"/>
  </node>
  <node id="129101" label="IDS" cy:nodeId="105922">
    <graphics y="233.31141923921723" z="0.0" x="-443.77523286113933"/>
  </node>
  <node id="129081" label="MECP2" cy:nodeId="105921">
    <graphics y="-40.78088117582183" z="0.0" x="2.626485278509108"/>
  </node>
  <node id="129080" label="MED1" cy:nodeId="105924">
    <graphics y="45.793932666951605" z="0.0" x="-50.77437836895183"/>
  </node>
  <node id="129189" label="NDST1" cy:nodeId="105923">
    <graphics y="668.643389454061" z="0.0" x="381.02478544940755"/>
  </node>
  <node id="129077" label="MEF2C" cy:nodeId="105926">
    <graphics y="942.332110157186" z="0.0" x="824.5019888185482"/>
  </node>
  <node id="129078" label="MEF2A" cy:nodeId="105925">
    <graphics y="483.009844532186" z="0.0" x="204.73167555560872"/>
  </node>
  <node id="129076" label="MEIS1" cy:nodeId="105928">
    <graphics y="881.5490291024985" z="0.0" x="486.5000662111263"/>
  </node>
  <node id="129074" label="MITF" cy:nodeId="105929">
    <graphics y="926.5817439462485" z="0.0" x="118.66454832782551"/>
  </node>
  <node id="129273" label="PIGX" cy:nodeId="107980">
    <graphics y="-492.548505077189" z="0.0" x="-617.3560434080143"/>
  </node>
  <node id="129071" label="MRE11A" cy:nodeId="105931">
    <graphics y="-243.16446805936675" z="0.0" x="7.0354360841731705"/>
  </node>
  <node id="129070" label="MXD3" cy:nodeId="105933">
    <graphics y="-1504.420087108439" z="0.0" x="-1098.3818002439518"/>
  </node>
  <node id="129068" label="RPN1" cy:nodeId="105936">
    <graphics y="-494.9210331533609" z="0.0" x="-1232.1148324705143"/>
  </node>
  <node id="129069" label="MYBL2" cy:nodeId="105935">
    <graphics y="-497.2839787100015" z="0.0" x="-1050.9281869627018"/>
  </node>
  <node id="129137" label="B3GNT8" cy:nodeId="107983">
    <graphics y="-3129.0947697256265" z="0.0" x="-836.8837533689518"/>
  </node>
  <node id="129230" label="SLC35C2" cy:nodeId="107986">
    <graphics y="-1642.347577342814" z="0.0" x="-748.3335214353581"/>
  </node>
  <node id="128982" label="CHST9" cy:nodeId="105939">
    <graphics y="472.007158985311" z="0.0" x="-834.1696420408268"/>
  </node>
  <node id="129216" label="E2F4" cy:nodeId="107987">
    <graphics y="1921.078692188436" z="0.0" x="43.61778776874348"/>
  </node>
  <node id="129067" label="MZF1" cy:nodeId="105942">
    <graphics y="-1238.2620060537515" z="0.0" x="-463.73470551738933"/>
  </node>
  <node id="129084" label="ST6GALNAC5" cy:nodeId="107989">
    <graphics y="865.9235408212485" z="0.0" x="-25.316660473444017"/>
  </node>
  <node id="129179" label="HAS3" cy:nodeId="105941">
    <graphics y="800.0979182626547" z="0.0" x="1624.7670034669857"/>
  </node>
  <node id="129065" label="NFATC1" cy:nodeId="105944">
    <graphics y="1259.277910938436" z="0.0" x="467.9823965333919"/>
  </node>
  <node id="129151" label="ALG14" cy:nodeId="107992">
    <graphics y="2053.340639820272" z="0.0" x="-1595.2832895017643"/>
  </node>
  <node id="129063" label="NFYC" cy:nodeId="105946">
    <graphics y="1930.3762690927329" z="0.0" x="-56.38221223125652"/>
  </node>
  <node id="129139" label="HNF1B" cy:nodeId="107994">
    <graphics y="-3293.6606876943765" z="0.0" x="-908.3892465330143"/>
  </node>
  <node id="129064" label="NFIC" cy:nodeId="105945">
    <graphics y="388.7121150399985" z="0.0" x="1054.3619131349544"/>
  </node>
  <node id="129055" label="NPAT" cy:nodeId="105948">
    <graphics y="42.10953020113129" z="0.0" x="-139.97350556621745"/>
  </node>
  <node id="129103" label="HS6ST1" cy:nodeId="107996">
    <graphics y="-2055.5976994131265" z="0.0" x="-988.2021127439518"/>
  </node>
  <node id="129061" label="NIPBL" cy:nodeId="105947">
    <graphics y="-322.34936262113433" z="0.0" x="592.6221975587825"/>
  </node>
  <node id="129239" label="SLC35D1" cy:nodeId="105950">
    <graphics y="252.7310664560141" z="0.0" x="986.8528799318294"/>
  </node>
  <node id="129053" label="NR2C2" cy:nodeId="105949">
    <graphics y="171.2494990732016" z="0.0" x="294.00186674823567"/>
  </node>
  <node id="129110" label="KDM4C" cy:nodeId="107997">
    <graphics y="356.53798173921723" z="0.0" x="109.13781111469075"/>
  </node>
  <node id="129051" label="NR2F1" cy:nodeId="105951">
    <graphics y="761.706133594686" z="0.0" x="464.5346121095638"/>
  </node>
  <node id="129037" label="PIGM" cy:nodeId="105954">
    <graphics y="-745.2307560537515" z="0.0" x="381.59981291522786"/>
  </node>
  <node id="129048" label="PHF20" cy:nodeId="105956">
    <graphics y="-718.3162052725015" z="0.0" x="-530.6491342283268"/>
  </node>
  <node id="129045" label="PIAS1" cy:nodeId="105958">
    <graphics y="143.98173784273285" z="0.0" x="652.8277029298763"/>
  </node>
  <node id="129082" label="MAFK" cy:nodeId="108006">
    <graphics y="-1192.635174999064" z="0.0" x="-212.41329438457683"/>
  </node>
  <node id="129047" label="PHF6" cy:nodeId="105957">
    <graphics y="-807.3237125967203" z="0.0" x="583.776128222845"/>
  </node>
  <node id="129042" label="POLR3A" cy:nodeId="105960">
    <graphics y="36.06125139253754" z="0.0" x="355.5963796876888"/>
  </node>
  <node id="129043" label="POLR2B" cy:nodeId="105959">
    <graphics y="-323.04465223295074" z="0.0" x="356.05620329608723"/>
  </node>
  <node id="129208" label="CHST1" cy:nodeId="108010">
    <graphics y="1455.315508594686" z="0.0" x="927.9400991701107"/>
  </node>
  <node id="129041" label="RAC3" cy:nodeId="105964">
    <graphics y="-1579.100751170939" z="0.0" x="-1552.2294564939518"/>
  </node>
</graph>
