# Supplementary material for: A systems-based framework to computationally describe putative transcription factors and signaling pathways regulating glycan biosynthesis
Source: publisher site journal article supplement (doi:10.3762/bjoc.17.119), 2021-07-22
Supplement: Additional file 2 [file 1860-5397-17-119-S2.cys › CytoscapeSession-2021_03_21-12_01/views/117543-138583-LUSC.xgmml]

<?xml version="1.0" encoding="UTF-8" standalone="yes"?>
<graph id="138583" label="LUSC" cy:view="1" cy:networkId="117543" cy:visualStyle="default" cy:rendererId="org.cytoscape.ding" cy:documentVersion="3.0" xmlns:dc="http://purl.org/dc/elements/1.1/" xmlns:xlink="http://www.w3.org/1999/xlink" xmlns:rdf="http://www.w3.org/1999/02/22-rdf-syntax-ns#" xmlns:cy="http://www.cytoscape.org" xmlns="http://www.cs.rpi.edu/XGMML">
  <graphics>
    <att name="NETWORK_NODE_SELECTION" value="true" type="string" cy:type="String"/>
    <att name="NETWORK_CENTER_X_LOCATION" value="753.235107421875" type="string" cy:type="String"/>
    <att name="NETWORK_HEIGHT" value="510.0" type="string" cy:type="String"/>
    <att name="NETWORK_TITLE" value="LUSC" type="string" cy:type="String"/>
    <att name="NETWORK_EDGE_SELECTION" value="true" type="string" cy:type="String"/>
    <att name="NETWORK_CENTER_Y_LOCATION" value="107.767578125" type="string" cy:type="String"/>
    <att name="NETWORK_WIDTH" value="1312.0" type="string" cy:type="String"/>
    <att name="NETWORK_DEPTH" value="0.0" type="string" cy:type="String"/>
    <att name="NETWORK_SCALE_FACTOR" value="0.10833448872859881" type="string" cy:type="String"/>
    <att name="NETWORK_ANNOTATION_SELECTION" value="false" type="string" cy:type="String"/>
    <att name="NETWORK_CENTER_Z_LOCATION" value="0.0" type="string" cy:type="String"/>
  </graphics>
  <node id="138640" label="RBBP5" cy:nodeId="105967">
    <graphics y="-1206.1775084984401" z="0.0" x="986.9707524876635"/>
  </node>
  <node id="138636" label="PIGB" cy:nodeId="108020">
    <graphics y="2017.2596939551731" z="0.0" x="114.95756126451897"/>
  </node>
  <node id="138810" label="BCL3" cy:nodeId="111092">
    <graphics y="289.34365544198954" z="0.0" x="724.2583501439135"/>
  </node>
  <node id="138637" label="RFX7" cy:nodeId="105974">
    <graphics y="2026.55727085947" z="0.0" x="214.5243871312182"/>
  </node>
  <node id="138638" label="COG2" cy:nodeId="105973">
    <graphics y="-1090.4316588890651" z="0.0" x="931.4542119603198"/>
  </node>
  <node id="138635" label="RUNX1" cy:nodeId="105978">
    <graphics y="-905.7059661400417" z="0.0" x="70.66991020250725"/>
  </node>
  <node id="138617" label="SRC" cy:nodeId="108028">
    <graphics y="2278.417103623142" z="0.0" x="-591.3927881617506"/>
  </node>
  <node id="138787" label="SULF2" cy:nodeId="105979">
    <graphics y="-1197.5885116112331" z="0.0" x="38.29234672594475"/>
  </node>
  <node id="138634" label="RUNX2" cy:nodeId="105981">
    <graphics y="-1331.7552596581081" z="0.0" x="-24.537731399055247"/>
  </node>
  <node id="138633" label="SIN3A" cy:nodeId="105984">
    <graphics y="-68.49350276113546" z="0.0" x="-678.5689813990552"/>
  </node>
  <node id="138604" label="TCF21" cy:nodeId="108031">
    <graphics y="-1613.0030547630886" z="0.0" x="-303.3381101984937"/>
  </node>
  <node id="138632" label="SMAD4" cy:nodeId="105987">
    <graphics y="2387.7146805274388" z="0.0" x="-192.25913642835212"/>
  </node>
  <node id="138591" label="XBP1" cy:nodeId="108037">
    <graphics y="-1656.7524749291042" z="0.0" x="-740.257396926399"/>
  </node>
  <node id="138630" label="SMC1A" cy:nodeId="105989">
    <graphics y="58.75930485605204" z="0.0" x="-617.1020624537427"/>
  </node>
  <node id="138650" label="NR4A1" cy:nodeId="111109">
    <graphics y="-1479.929919387112" z="0.0" x="260.388110886101"/>
  </node>
  <node id="138625" label="UGDH" cy:nodeId="108551">
    <graphics y="-1887.698702956448" z="0.0" x="1292.4160592656176"/>
  </node>
  <node id="138615" label="SRCAP" cy:nodeId="105994">
    <graphics y="2178.417103623142" z="0.0" x="-990.526439895149"/>
  </node>
  <node id="138614" label="SREBF2" cy:nodeId="105995">
    <graphics y="1557.5143707740208" z="0.0" x="-990.526439895149"/>
  </node>
  <node id="138761" label="DDOST" cy:nodeId="108555">
    <graphics y="2278.417103623142" z="0.0" x="-391.82596229505134"/>
  </node>
  <node id="138612" label="GANAB" cy:nodeId="105998">
    <graphics y="2026.55727085947" z="0.0" x="414.0912129979174"/>
  </node>
  <node id="138613" label="SSRP1" cy:nodeId="105997">
    <graphics y="2017.2596939551731" z="0.0" x="314.5243871312182"/>
  </node>
  <node id="138647" label="PIGF" cy:nodeId="108557">
    <graphics y="2278.417103623142" z="0.0" x="-192.25913642835212"/>
  </node>
  <node id="138611" label="STAT1" cy:nodeId="105999">
    <graphics y="-1209.3891097557644" z="0.0" x="-874.7243158717115"/>
  </node>
  <node id="138610" label="STAT4" cy:nodeId="106002">
    <graphics y="-1570.7381011498073" z="0.0" x="-474.0751459498365"/>
  </node>
  <node id="138609" label="SUMO2" cy:nodeId="106004">
    <graphics y="2069.027027939548" z="0.0" x="-654.5605814356763"/>
  </node>
  <node id="138606" label="TAF1" cy:nodeId="106006">
    <graphics y="799.4790924537083" z="0.0" x="-347.4995539088209"/>
  </node>
  <node id="138784" label="COG1" cy:nodeId="106005">
    <graphics y="920.6240967261692" z="0.0" x="-70.35553764295173"/>
  </node>
  <node id="138603" label="TCF7" cy:nodeId="106008">
    <graphics y="-1078.3718444359401" z="0.0" x="-345.2609560389478"/>
  </node>
  <node id="138605" label="TCF12" cy:nodeId="106007">
    <graphics y="-516.1096526634792" z="0.0" x="-418.023151626106"/>
  </node>
  <node id="138762" label="EBNA1BP2" cy:nodeId="108576">
    <graphics y="2287.7146805274388" z="0.0" x="-292.2591364283521"/>
  </node>
  <node id="138602" label="TP63" cy:nodeId="106017">
    <graphics y="-1744.6085235130886" z="0.0" x="503.53209281969475"/>
  </node>
  <node id="138735" label="EZH2" cy:nodeId="108582">
    <graphics y="-1495.940386916409" z="0.0" x="1552.4050481419604"/>
  </node>
  <node id="138737" label="ETV4" cy:nodeId="108581">
    <graphics y="-1657.6885406029323" z="0.0" x="662.6667974095385"/>
  </node>
  <node id="138595" label="WDR5" cy:nodeId="106024">
    <graphics y="-1604.6665984642605" z="0.0" x="2025.1649053196948"/>
  </node>
  <node id="138698" label="CHPF" cy:nodeId="108583">
    <graphics y="2017.2596939551731" z="0.0" x="-272.8194849390943"/>
  </node>
  <node id="138684" label="HEXB" cy:nodeId="108585">
    <graphics y="-1356.5113250267605" z="0.0" x="-927.7467768092115"/>
  </node>
  <node id="138590" label="YY1" cy:nodeId="106028">
    <graphics y="1564.9674042212864" z="0.0" x="-419.481518020149"/>
  </node>
  <node id="138589" label="ZBTB17" cy:nodeId="106029">
    <graphics y="424.2243317115208" z="0.0" x="-742.7520744700391"/>
  </node>
  <node id="138586" label="ZBTB33" cy:nodeId="106031">
    <graphics y="-2057.407260085354" z="0.0" x="1335.4190785985033"/>
  </node>
  <node id="138706" label="HBP1" cy:nodeId="108591">
    <graphics y="1557.5143707740208" z="0.0" x="617.5772893528979"/>
  </node>
  <node id="138704" label="SULT1A3" cy:nodeId="108594">
    <graphics y="399.49111637948954" z="0.0" x="-306.0355951685865"/>
  </node>
  <node id="138705" label="HDAC6" cy:nodeId="108593">
    <graphics y="527.7961090552708" z="0.0" x="-279.9473078150709"/>
  </node>
  <node id="138728" label="STS" cy:nodeId="108600">
    <graphics y="-1689.7483855736355" z="0.0" x="-229.33721565198493"/>
  </node>
  <node id="138722" label="GMDS" cy:nodeId="113219">
    <graphics y="428.6655357825657" z="0.0" x="467.44693351793694"/>
  </node>
  <node id="138628" label="SNAPC1" cy:nodeId="108618">
    <graphics y="1769.1202362525364" z="0.0" x="-325.51392768811775"/>
  </node>
  <node id="138703" label="HEXIM1" cy:nodeId="112221">
    <graphics y="2287.7146805274388" z="0.0" x="306.44134117174553"/>
  </node>
  <node id="138622" label="UGT1A6" cy:nodeId="112226">
    <graphics y="-1595.4993621361355" z="0.0" x="1330.6283071141283"/>
  </node>
  <node id="138623" label="B4GALT4" cy:nodeId="112227">
    <graphics y="-1716.6183196556667" z="0.0" x="1334.6539113621752"/>
  </node>
  <node id="138711" label="SMPD1" cy:nodeId="109673">
    <graphics y="-1734.7490569603542" z="0.0" x="-316.0450651545484"/>
  </node>
  <node id="138600" label="UGT1A7" cy:nodeId="109676">
    <graphics y="-1653.7930633080105" z="0.0" x="395.76414848375725"/>
  </node>
  <node id="138713" label="GATA3" cy:nodeId="109677">
    <graphics y="-1093.5479156029323" z="0.0" x="-246.49896644544197"/>
  </node>
  <node id="138701" label="HEY1" cy:nodeId="109679">
    <graphics y="-1544.4862700951198" z="0.0" x="734.7552373509448"/>
  </node>
  <node id="138702" label="XYLT2" cy:nodeId="109684">
    <graphics y="2278.417103623142" z="0.0" x="206.87451530504632"/>
  </node>
  <node id="138654" label="NR1H2" cy:nodeId="109685">
    <graphics y="445.0792206275364" z="0.0" x="-510.30189155530525"/>
  </node>
  <node id="138601" label="UGT1A9" cy:nodeId="109687">
    <graphics y="-1874.5059539330105" z="0.0" x="473.17515922594475"/>
  </node>
  <node id="138708" label="GTF3C1" cy:nodeId="110795">
    <graphics y="690.4692352759739" z="0.0" x="-604.9514582056959"/>
  </node>
  <node id="138822" label="ADNP" cy:nodeId="105684">
    <graphics y="-1488.8876220238308" z="0.0" x="-88.72169135999275"/>
  </node>
  <node id="138821" label="FUT7" cy:nodeId="105685">
    <graphics y="-1399.1970473778347" z="0.0" x="-423.3532907862623"/>
  </node>
  <node id="138771" label="STT3B" cy:nodeId="105688">
    <graphics y="2278.417103623142" z="0.0" x="-790.9596140284498"/>
  </node>
  <node id="138653" label="NR1H3" cy:nodeId="110807">
    <graphics y="-1523.1479980003933" z="0.0" x="-990.526439895149"/>
  </node>
  <node id="138669" label="NEU3" cy:nodeId="105689">
    <graphics y="1664.0753601539036" z="0.0" x="248.748706589226"/>
  </node>
  <node id="138744" label="GALNT10" cy:nodeId="105697">
    <graphics y="-1244.1899558556179" z="0.0" x="-55.21595405530525"/>
  </node>
  <node id="138819" label="RTF1" cy:nodeId="105700">
    <graphics y="-162.89328303457296" z="0.0" x="-579.8609888453443"/>
  </node>
  <node id="138820" label="ARID2" cy:nodeId="105699">
    <graphics y="-199.19320979238546" z="0.0" x="-704.5467951197584"/>
  </node>
  <node id="138629" label="UGGT1" cy:nodeId="105705">
    <graphics y="189.34365544198954" z="0.0" x="-646.7441522974927"/>
  </node>
  <node id="138741" label="HAS1" cy:nodeId="105708">
    <graphics y="-1426.6851302635769" z="0.0" x="83.75984550524163"/>
  </node>
  <node id="138585" label="FKTN" cy:nodeId="105713">
    <graphics y="-2181.477084304104" z="0.0" x="1363.2548635106127"/>
  </node>
  <node id="138643" label="MAN1A1" cy:nodeId="105716">
    <graphics y="2278.417103623142" z="0.0" x="406.44134117174553"/>
  </node>
  <node id="138730" label="CSGALNACT2" cy:nodeId="105715">
    <graphics y="-1293.538182402859" z="0.0" x="-442.4321710963209"/>
  </node>
  <node id="138752" label="CHST11" cy:nodeId="105718">
    <graphics y="-1183.6226150047878" z="0.0" x="-271.3042070765455"/>
  </node>
  <node id="138667" label="CHSY1" cy:nodeId="105717">
    <graphics y="-340.1357757103542" z="0.0" x="-378.56024574231697"/>
  </node>
  <node id="138619" label="ST6GAL2" cy:nodeId="105720">
    <graphics y="-1739.4751616966823" z="0.0" x="1213.9204328160326"/>
  </node>
  <node id="138788" label="GFPT2" cy:nodeId="105719">
    <graphics y="-1331.0599776756862" z="0.0" x="-150.06791328382087"/>
  </node>
  <node id="138818" label="BATF" cy:nodeId="105721">
    <graphics y="-1541.1434356224636" z="0.0" x="-606.6120111842115"/>
  </node>
  <node id="138743" label="MGAT1" cy:nodeId="105724">
    <graphics y="-1556.3843719017605" z="0.0" x="-362.40963386487556"/>
  </node>
  <node id="138812" label="BATF3" cy:nodeId="105723">
    <graphics y="-1006.7858916771511" z="0.0" x="-760.6326105494459"/>
  </node>
  <node id="138808" label="BRCA1" cy:nodeId="105728">
    <graphics y="-1501.2869597923855" z="0.0" x="1773.4424321751635"/>
  </node>
  <node id="138807" label="PIGW" cy:nodeId="105729">
    <graphics y="-1566.2039214623073" z="0.0" x="1658.8180120091479"/>
  </node>
  <node id="138639" label="FAM20B" cy:nodeId="105731">
    <graphics y="-1363.9671737206081" z="0.0" x="1065.1067235569994"/>
  </node>
  <node id="138658" label="NKX2-1" cy:nodeId="116995">
    <graphics y="-2021.0902434837917" z="0.0" x="-503.00518440198493"/>
  </node>
  <node id="138805" label="ALG12" cy:nodeId="105734">
    <graphics y="1635.9913300025364" z="0.0" x="-911.7123529810865"/>
  </node>
  <node id="138806" label="BRD1" cy:nodeId="105733">
    <graphics y="1713.9259766089817" z="0.0" x="-833.4349481959302"/>
  </node>
  <node id="138681" label="CTNS" cy:nodeId="114952">
    <graphics y="2387.7146805274388" z="0.0" x="-391.82596229505134"/>
  </node>
  <node id="138798" label="CBFB" cy:nodeId="105739">
    <graphics y="1557.5143707740208" z="0.0" x="517.5772893528979"/>
  </node>
  <node id="138795" label="RFNG" cy:nodeId="105744">
    <graphics y="1155.9182327735325" z="0.0" x="94.38797355699944"/>
  </node>
  <node id="138791" label="ST6GALNAC6" cy:nodeId="105746">
    <graphics y="-1760.5217925560573" z="0.0" x="2496.9966924290698"/>
  </node>
  <node id="138620" label="ST3GAL3" cy:nodeId="105747">
    <graphics y="-1449.0749999535183" z="0.0" x="1177.1967351536791"/>
  </node>
  <node id="138759" label="ALG8" cy:nodeId="107286">
    <graphics y="2287.7146805274388" z="0.0" x="705.574992905144"/>
  </node>
  <node id="138588" label="IDUA" cy:nodeId="105749">
    <graphics y="296.2011688697239" z="0.0" x="-807.0193827052076"/>
  </node>
  <node id="138760" label="EED" cy:nodeId="107285">
    <graphics y="2278.417103623142" z="0.0" x="606.0081670384448"/>
  </node>
  <node id="138796" label="CBX8" cy:nodeId="105752">
    <graphics y="1268.628414963474" z="0.0" x="173.84971977281975"/>
  </node>
  <node id="138794" label="GALK1" cy:nodeId="105753">
    <graphics y="1367.621365402927" z="0.0" x="245.84205986071038"/>
  </node>
  <node id="138727" label="FOSL1" cy:nodeId="107294">
    <graphics y="2387.7146805274388" z="0.0" x="-790.9596140284498"/>
  </node>
  <node id="138792" label="DPM2" cy:nodeId="105758">
    <graphics y="-1682.5389739525417" z="0.0" x="2237.2576177220385"/>
  </node>
  <node id="138793" label="CDK9" cy:nodeId="105757">
    <graphics y="-1726.2962676537136" z="0.0" x="2381.7031133275073"/>
  </node>
  <node id="138626" label="GCNT2" cy:nodeId="107296">
    <graphics y="-1494.568850661526" z="0.0" x="1276.189871559624"/>
  </node>
  <node id="138593" label="MAN1B1" cy:nodeId="105760">
    <graphics y="-1723.116427565823" z="0.0" x="2062.9879033665698"/>
  </node>
  <node id="138778" label="PIGQ" cy:nodeId="105759">
    <graphics y="679.7318695533177" z="0.0" x="-747.1431562800367"/>
  </node>
  <node id="138799" label="MOGS" cy:nodeId="105762">
    <graphics y="-1263.7737800133327" z="0.0" x="1718.338062057976"/>
  </node>
  <node id="138594" label="POMT1" cy:nodeId="105761">
    <graphics y="-1554.0806304466823" z="0.0" x="2150.3267705540698"/>
  </node>
  <node id="138707" label="GTF3C2" cy:nodeId="107302">
    <graphics y="-1243.6093169701198" z="0.0" x="1498.4438970189135"/>
  </node>
  <node id="138751" label="MFNG" cy:nodeId="105766">
    <graphics y="-1490.1619445335964" z="0.0" x="-426.23434089612556"/>
  </node>
  <node id="138679" label="A4GALT" cy:nodeId="105768">
    <graphics y="2387.7146805274388" z="0.0" x="-990.526439895149"/>
  </node>
  <node id="138790" label="CEBPB" cy:nodeId="105767">
    <graphics y="-1183.0738402855495" z="0.0" x="-119.81170295667243"/>
  </node>
  <node id="138783" label="CHD2" cy:nodeId="105770">
    <graphics y="665.4201324927708" z="0.0" x="-410.30189155530525"/>
  </node>
  <node id="138764" label="GNPDA1" cy:nodeId="107305">
    <graphics y="1622.7682770240208" z="0.0" x="703.2634465794604"/>
  </node>
  <node id="138786" label="CHD1" cy:nodeId="105769">
    <graphics y="801.0627106177708" z="0.0" x="-165.05613349866462"/>
  </node>
  <node id="138754" label="NDST2" cy:nodeId="105772">
    <graphics y="-1657.9276763451198" z="0.0" x="-563.0185663599927"/>
  </node>
  <node id="138785" label="OGT" cy:nodeId="105771">
    <graphics y="691.8781403052708" z="0.0" x="-287.042553176399"/>
  </node>
  <node id="138815" label="NAAA" cy:nodeId="107310">
    <graphics y="-1462.056841994534" z="0.0" x="-777.7435724635084"/>
  </node>
  <node id="138656" label="LAMP3" cy:nodeId="105776">
    <graphics y="-2181.477084304104" z="0.0" x="-475.2737085719068"/>
  </node>
  <node id="138782" label="CIITA" cy:nodeId="105775">
    <graphics y="-1124.8936645042995" z="0.0" x="-525.3785059351881"/>
  </node>
  <node id="138723" label="UGT2A1" cy:nodeId="117554">
    <graphics y="570.3337181556126" z="0.0" x="661.4026982884448"/>
  </node>
  <node id="138770" label="DLX6" cy:nodeId="117553">
    <graphics y="2397.0122574317356" z="0.0" x="-491.82596229505134"/>
  </node>
  <node id="138781" label="MAN2B1" cy:nodeId="105777">
    <graphics y="-1130.7999907982448" z="0.0" x="-638.143383254524"/>
  </node>
  <node id="138779" label="CPSF3L" cy:nodeId="105780">
    <graphics y="890.6922577369114" z="0.0" x="-808.1615564722974"/>
  </node>
  <node id="138597" label="DSE" cy:nodeId="105779">
    <graphics y="-1135.8919860375026" z="0.0" x="183.14216972399163"/>
  </node>
  <node id="138657" label="SULT1A2" cy:nodeId="117555">
    <graphics y="-2142.500521804104" z="0.0" x="-609.5307428736646"/>
  </node>
  <node id="138682" label="KDM6B" cy:nodeId="107315">
    <graphics y="2397.0122574317356" z="0.0" x="-292.2591364283521"/>
  </node>
  <node id="138680" label="KLF5" cy:nodeId="107318">
    <graphics y="2397.0122574317356" z="0.0" x="-890.9596140284498"/>
  </node>
  <node id="138688" label="B3GALT6" cy:nodeId="105781">
    <graphics y="453.7325104224583" z="0.0" x="-862.1518213648756"/>
  </node>
  <node id="138678" label="LDB1" cy:nodeId="107320">
    <graphics y="713.2969330298802" z="0.0" x="-873.9108240504224"/>
  </node>
  <node id="138804" label="B4GALNT4" cy:nodeId="105784">
    <graphics y="1805.4236877906224" z="0.0" x="-741.5261347193677"/>
  </node>
  <node id="138776" label="CREB3" cy:nodeId="105786">
    <graphics y="2287.7146805274388" z="0.0" x="-890.9596140284498"/>
  </node>
  <node id="138670" label="MED12" cy:nodeId="107324">
    <graphics y="1689.7763184058567" z="0.0" x="138.58851982164788"/>
  </node>
  <node id="138673" label="MBD3" cy:nodeId="107323">
    <graphics y="794.0547455298802" z="0.0" x="-684.0360414881666"/>
  </node>
  <node id="138587" label="GMPPA" cy:nodeId="105787">
    <graphics y="289.34365544198954" z="0.0" x="-668.9572374720533"/>
  </node>
  <node id="138662" label="NCOR2" cy:nodeId="107326">
    <graphics y="-954.6282073509792" z="0.0" x="-304.6762087244947"/>
  </node>
  <node id="138774" label="CREBBP" cy:nodeId="105790">
    <graphics y="2017.2596939551731" z="0.0" x="-848.3735773463209"/>
  </node>
  <node id="138745" label="PAPSS2" cy:nodeId="107328">
    <graphics y="-1454.8741637718776" z="0.0" x="-265.1267359156568"/>
  </node>
  <node id="138773" label="COG7" cy:nodeId="105791">
    <graphics y="2097.8373611915013" z="0.0" x="-919.4511530299146"/>
  </node>
  <node id="138772" label="CTNNB1" cy:nodeId="105794">
    <graphics y="2287.7146805274388" z="0.0" x="-691.3927881617506"/>
  </node>
  <node id="138607" label="PIGY" cy:nodeId="107332">
    <graphics y="2017.2596939551731" z="0.0" x="-560.5965311427076"/>
  </node>
  <node id="138768" label="E2F1" cy:nodeId="105796">
    <graphics y="-1294.0931998741726" z="0.0" x="1387.264964828972"/>
  </node>
  <node id="138631" label="B4GALT6" cy:nodeId="107331">
    <graphics y="2397.0122574317356" z="0.0" x="-92.6923105616529"/>
  </node>
  <node id="138608" label="SLC35B1" cy:nodeId="105798">
    <graphics y="2120.711293076267" z="0.0" x="-748.3735773463209"/>
  </node>
  <node id="138649" label="NRF1" cy:nodeId="107333">
    <graphics y="1917.2596939551731" z="0.0" x="-739.6080438990552"/>
  </node>
  <node id="138769" label="ALG3" cy:nodeId="105797">
    <graphics y="2387.7146805274388" z="0.0" x="-591.3927881617506"/>
  </node>
  <node id="138646" label="PML" cy:nodeId="107336">
    <graphics y="-1590.9385100853542" z="0.0" x="-212.16674446057868"/>
  </node>
  <node id="138800" label="KHK" cy:nodeId="105800">
    <graphics y="-1401.8406707298855" z="0.0" x="1453.7949407200854"/>
  </node>
  <node id="138765" label="E2F6" cy:nodeId="105801">
    <graphics y="1690.9602936255833" z="0.0" x="792.8067205052416"/>
  </node>
  <node id="138789" label="ST3GAL2" cy:nodeId="105806">
    <graphics y="-1194.3751098167995" z="0.0" x="-341.46687339734626"/>
  </node>
  <node id="138747" label="CSGALNACT1" cy:nodeId="105805">
    <graphics y="-1373.9656402123073" z="0.0" x="-217.68919013928962"/>
  </node>
  <node id="138627" label="SOX2" cy:nodeId="107345">
    <graphics y="-1612.0603972923855" z="0.0" x="1207.4608190159838"/>
  </node>
  <node id="138598" label="VDR" cy:nodeId="107356">
    <graphics y="-1109.0853911888698" z="0.0" x="-48.06437324475837"/>
  </node>
  <node id="138802" label="SLC35E1" cy:nodeId="106844">
    <graphics y="2287.7146805274388" z="0.0" x="106.87451530504632"/>
  </node>
  <node id="138803" label="BRD4" cy:nodeId="106843">
    <graphics y="2278.417103623142" z="0.0" x="7.307689438347097"/>
  </node>
  <node id="138758" label="ELF1" cy:nodeId="105822">
    <graphics y="2069.027027939548" z="0.0" x="-79.00648902844978"/>
  </node>
  <node id="138756" label="COG6" cy:nodeId="105824">
    <graphics y="2017.2596939551731" z="0.0" x="14.957561264518972"/>
  </node>
  <node id="138757" label="COG3" cy:nodeId="105823">
    <graphics y="2120.711293076267" z="0.0" x="-172.8194849390943"/>
  </node>
  <node id="138755" label="ERCC6" cy:nodeId="105830">
    <graphics y="-1835.5032073509792" z="0.0" x="-593.6756708521802"/>
  </node>
  <node id="138780" label="XYLT1" cy:nodeId="106854">
    <graphics y="-1066.4360991966823" z="0.0" x="-429.08995460462165"/>
  </node>
  <node id="138731" label="MAN1C1" cy:nodeId="106853">
    <graphics y="-1494.2803832542995" z="0.0" x="-185.39519905042243"/>
  </node>
  <node id="138817" label="FUCA1" cy:nodeId="106856">
    <graphics y="-1409.5638152611355" z="0.0" x="-575.6645777125318"/>
  </node>
  <node id="138813" label="ST6GAL1" cy:nodeId="106855">
    <graphics y="-1477.6611968529323" z="0.0" x="-592.4032404322584"/>
  </node>
  <node id="138732" label="ST8SIA4" cy:nodeId="105834">
    <graphics y="-1348.5432387840847" z="0.0" x="-627.2413446803052"/>
  </node>
  <node id="138816" label="ST3GAL5" cy:nodeId="106857">
    <graphics y="-1656.4144622337917" z="0.0" x="-409.9613001246412"/>
  </node>
  <node id="138621" label="UST" cy:nodeId="105836">
    <graphics y="-1694.2257720482448" z="0.0" x="1098.8950536351244"/>
  </node>
  <node id="138814" label="MGAT4A" cy:nodeId="106860">
    <graphics y="-1425.3213073265651" z="0.0" x="-494.387035598274"/>
  </node>
  <node id="138736" label="CHST7" cy:nodeId="105835">
    <graphics y="-1672.117404128323" z="0.0" x="781.4326360325854"/>
  </node>
  <node id="138716" label="FUS" cy:nodeId="106862">
    <graphics y="1806.8396728980442" z="0.0" x="-629.682445754524"/>
  </node>
  <node id="138746" label="CHST15" cy:nodeId="106861">
    <graphics y="-1255.602870131741" z="0.0" x="-201.8802759547193"/>
  </node>
  <node id="138714" label="GPI" cy:nodeId="106864">
    <graphics y="-1838.8550139916042" z="0.0" x="1093.4345738987963"/>
  </node>
  <node id="138715" label="GAPDH" cy:nodeId="106863">
    <graphics y="-1967.183566237698" z="0.0" x="1032.8236119847338"/>
  </node>
  <node id="138753" label="ETS1" cy:nodeId="105839">
    <graphics y="-1302.7225734245876" z="0.0" x="-317.95033000897956"/>
  </node>
  <node id="138740" label="ETV1" cy:nodeId="105842">
    <graphics y="-627.3230315697292" z="0.0" x="-83.758617629524"/>
  </node>
  <node id="138674" label="MGAT2" cy:nodeId="106868">
    <graphics y="1683.9653900611302" z="0.0" x="-407.6755182642896"/>
  </node>
  <node id="138739" label="ARSB" cy:nodeId="105843">
    <graphics y="-504.5168792259792" z="0.0" x="16.23488212633538"/>
  </node>
  <node id="138689" label="IRF3" cy:nodeId="106872">
    <graphics y="547.5599945533177" z="0.0" x="-755.7259790797193"/>
  </node>
  <node id="138733" label="FLI1" cy:nodeId="105848">
    <graphics y="-1407.9605437767605" z="0.0" x="-363.975788344856"/>
  </node>
  <node id="138734" label="FANCD2" cy:nodeId="105847">
    <graphics y="-1702.183108474026" z="0.0" x="1654.2528874974291"/>
  </node>
  <node id="138599" label="UGT1A1" cy:nodeId="116602">
    <graphics y="-1788.5170318138698" z="0.0" x="360.388110886101"/>
  </node>
  <node id="138725" label="FOXA1" cy:nodeId="105850">
    <graphics y="499.6337212073704" z="0.0" x="564.608569870476"/>
  </node>
  <node id="138675" label="PIGH" cy:nodeId="105852">
    <graphics y="1557.5143707740208" z="0.0" x="-529.682445754524"/>
  </node>
  <node id="138720" label="SULT1C2" cy:nodeId="116604">
    <graphics y="-2080.061068679104" z="0.0" x="-232.8459970850904"/>
  </node>
  <node id="138665" label="MEIS3" cy:nodeId="106878">
    <graphics y="-936.1850615990261" z="0.0" x="-443.95191596936775"/>
  </node>
  <node id="138721" label="FOXA2" cy:nodeId="116606">
    <graphics y="-1933.4769011986355" z="0.0" x="-302.42143463086677"/>
  </node>
  <node id="138666" label="MEF2B" cy:nodeId="106877">
    <graphics y="-1585.1985503685573" z="0.0" x="-829.6320307154615"/>
  </node>
  <node id="138644" label="POU2F2" cy:nodeId="106880">
    <graphics y="2287.7146805274388" z="0.0" x="506.00816703844475"/>
  </node>
  <node id="138719" label="FOXO1" cy:nodeId="105856">
    <graphics y="-791.2468902123073" z="0.0" x="88.23826957750725"/>
  </node>
  <node id="138718" label="FOXP3" cy:nodeId="105858">
    <graphics y="-1229.340319777737" z="0.0" x="-475.66033576917243"/>
  </node>
  <node id="138738" label="DSEL" cy:nodeId="105857">
    <graphics y="-515.1140471947292" z="0.0" x="-230.31055091809822"/>
  </node>
  <node id="138618" label="NPL" cy:nodeId="105860">
    <graphics y="-1600.962893630276" z="0.0" x="1022.5797155003588"/>
  </node>
  <node id="138748" label="SULF1" cy:nodeId="106883">
    <graphics y="-953.2235747826198" z="0.0" x="-92.0646479029615"/>
  </node>
  <node id="138811" label="HK3" cy:nodeId="105859">
    <graphics y="-1214.3893233788112" z="0.0" x="-591.2721979517896"/>
  </node>
  <node id="138712" label="GATA6" cy:nodeId="105862">
    <graphics y="-1489.1900969994167" z="0.0" x="-342.7602159876783"/>
  </node>
  <node id="138699" label="EXTL1" cy:nodeId="106887">
    <graphics y="2120.711293076267" z="0.0" x="-460.5965311427076"/>
  </node>
  <node id="138710" label="GTF2B" cy:nodeId="105868">
    <graphics y="2017.2596939551731" z="0.0" x="514.0912129979174"/>
  </node>
  <node id="138766" label="COG4" cy:nodeId="106892">
    <graphics y="1873.0694664466282" z="0.0" x="406.7063481907885"/>
  </node>
  <node id="138797" label="COG8" cy:nodeId="106891">
    <graphics y="1660.2366302955052" z="0.0" x="481.4887883763354"/>
  </node>
  <node id="138695" label="STT3A" cy:nodeId="106893">
    <graphics y="1758.6412628638645" z="0.0" x="38.58851982164788"/>
  </node>
  <node id="138775" label="PIGO" cy:nodeId="105874">
    <graphics y="2278.417103623142" z="0.0" x="-990.526439895149"/>
  </node>
  <node id="138696" label="DPAGT1" cy:nodeId="105878">
    <graphics y="1622.7682770240208" z="0.0" x="-139.82777046155525"/>
  </node>
  <node id="138697" label="HINFP" cy:nodeId="105877">
    <graphics y="1690.9602936255833" z="0.0" x="-50.284496535774"/>
  </node>
  <node id="138777" label="TSTA3" cy:nodeId="105880">
    <graphics y="1036.1111420142552" z="0.0" x="-839.9616739649732"/>
  </node>
  <node id="138694" label="HSF1" cy:nodeId="105879">
    <graphics y="1166.8735931861302" z="0.0" x="-865.1039545435865"/>
  </node>
  <node id="138692" label="IKZF1" cy:nodeId="105882">
    <graphics y="-1348.5391532433132" z="0.0" x="-522.9567377467115"/>
  </node>
  <node id="138693" label="GPAA1" cy:nodeId="105881">
    <graphics y="1280.1323822486302" z="0.0" x="-885.4995386500318"/>
  </node>
  <node id="138749" label="LIPA" cy:nodeId="105884">
    <graphics y="-1265.1529571068386" z="0.0" x="-652.8871881861646"/>
  </node>
  <node id="138691" label="INO80" cy:nodeId="105885">
    <graphics y="-60.97189631582296" z="0.0" x="-504.6865198512037"/>
  </node>
  <node id="138686" label="IRF4" cy:nodeId="105888">
    <graphics y="-1510.1832305443386" z="0.0" x="-519.7851374049146"/>
  </node>
  <node id="138690" label="IRF1" cy:nodeId="105887">
    <graphics y="-1115.4630614769558" z="0.0" x="-799.7420465846021"/>
  </node>
  <node id="138685" label="IRF8" cy:nodeId="105890">
    <graphics y="-1373.3328124535183" z="0.0" x="-708.8899347681959"/>
  </node>
  <node id="138683" label="JMJD6" cy:nodeId="105894">
    <graphics y="1039.2883308875462" z="0.0" x="14.417266617302175"/>
  </node>
  <node id="138660" label="MGAT5" cy:nodeId="105893">
    <graphics y="-615.4466277611355" z="0.0" x="-377.2827188868482"/>
  </node>
  <node id="138687" label="FKRP" cy:nodeId="105896">
    <graphics y="473.0063141333958" z="0.0" x="-635.0440943140943"/>
  </node>
  <node id="138742" label="GBGT1" cy:nodeId="105897">
    <graphics y="-1371.39048304678" z="0.0" x="-303.9453089137037"/>
  </node>
  <node id="138729" label="GNS" cy:nodeId="105905">
    <graphics y="-1631.1626922142605" z="0.0" x="-108.12752937268806"/>
  </node>
  <node id="138809" label="HS3ST1" cy:nodeId="105910">
    <graphics y="381.8840225684544" z="0.0" x="652.2572820286791"/>
  </node>
  <node id="138676" label="MAX" cy:nodeId="105915">
    <graphics y="1667.9112823951145" z="0.0" x="-526.1751825709302"/>
  </node>
  <node id="138724" label="ST6GALNAC1" cy:nodeId="105920">
    <graphics y="618.9477318274876" z="0.0" x="479.10147453356194"/>
  </node>
  <node id="138672" label="MECOM" cy:nodeId="105919">
    <graphics y="715.6869591224095" z="0.0" x="412.8488957982104"/>
  </node>
  <node id="138671" label="MED1" cy:nodeId="105924">
    <graphics y="-1648.5767547142605" z="0.0" x="1773.409839401726"/>
  </node>
  <node id="138750" label="NDST1" cy:nodeId="105923">
    <graphics y="-979.7999297630886" z="0.0" x="-211.37373756360603"/>
  </node>
  <node id="138668" label="MEF2A" cy:nodeId="105925">
    <graphics y="-219.21615901113546" z="0.0" x="-320.8694879908521"/>
  </node>
  <node id="138801" label="C17orf96" cy:nodeId="107978">
    <graphics y="-1383.7019607079128" z="0.0" x="1631.4837834935229"/>
  </node>
  <node id="138664" label="MRE11A" cy:nodeId="105931">
    <graphics y="1557.5143707740208" z="0.0" x="294.0317571263354"/>
  </node>
  <node id="138616" label="SLC35C2" cy:nodeId="107986">
    <graphics y="2287.7146805274388" z="0.0" x="-491.82596229505134"/>
  </node>
  <node id="138663" label="MYH11" cy:nodeId="105937">
    <graphics y="-1797.6727324974636" z="0.0" x="749.7608525853198"/>
  </node>
  <node id="138767" label="E2F4" cy:nodeId="107987">
    <graphics y="1770.349148606052" z="0.0" x="442.80015922594475"/>
  </node>
  <node id="138592" label="B4GALNT1" cy:nodeId="107990">
    <graphics y="-1477.501422072659" z="0.0" x="2046.768237839226"/>
  </node>
  <node id="138717" label="ST6GALNAC5" cy:nodeId="107989">
    <graphics y="-989.2186004173855" z="0.0" x="-608.1425897974927"/>
  </node>
  <node id="138726" label="HAS3" cy:nodeId="105941">
    <graphics y="2397.0122574317356" z="0.0" x="-691.3927881617506"/>
  </node>
  <node id="138709" label="ALG14" cy:nodeId="107992">
    <graphics y="2026.55727085947" z="0.0" x="613.6580388646166"/>
  </node>
  <node id="138659" label="NFYC" cy:nodeId="105946">
    <graphics y="410.1662567603489" z="0.0" x="-990.526439895149"/>
  </node>
  <node id="138661" label="NFIC" cy:nodeId="105945">
    <graphics y="-747.167208815823" z="0.0" x="-296.92997764539314"/>
  </node>
  <node id="138700" label="HEYL" cy:nodeId="107993">
    <graphics y="2069.027027939548" z="0.0" x="-366.78353523206306"/>
  </node>
  <node id="138655" label="NPAT" cy:nodeId="105948">
    <graphics y="1557.5143707740208" z="0.0" x="-225.51392768811775"/>
  </node>
  <node id="138596" label="SLC35D1" cy:nodeId="105950">
    <graphics y="-1026.8836089623073" z="0.0" x="141.032886276726"/>
  </node>
  <node id="138652" label="NR2C2" cy:nodeId="105949">
    <graphics y="-1819.7016936791042" z="0.0" x="-722.0597345728834"/>
  </node>
  <node id="138651" label="NR2F1" cy:nodeId="105951">
    <graphics y="-1643.9413177025417" z="0.0" x="22.71083427477288"/>
  </node>
  <node id="138763" label="PIGM" cy:nodeId="105954">
    <graphics y="1758.6412628638645" z="0.0" x="881.6797368626635"/>
  </node>
  <node id="138648" label="PCGF1" cy:nodeId="105955">
    <graphics y="2287.7146805274388" z="0.0" x="-92.6923105616529"/>
  </node>
  <node id="138677" label="MAFK" cy:nodeId="108006">
    <graphics y="289.34365544198954" z="0.0" x="-334.8443415064771"/>
  </node>
  <node id="138645" label="POLR3A" cy:nodeId="105960">
    <graphics y="1761.2181843268772" z="0.0" x="306.7063481907885"/>
  </node>
  <node id="138642" label="PRDM1" cy:nodeId="105962">
    <graphics y="-804.6913177025417" z="0.0" x="-50.10618232678962"/>
  </node>
  <node id="138641" label="RAC3" cy:nodeId="105964">
    <graphics y="1457.5143707740208" z="0.0" x="312.8488957982104"/>
  </node>
  <node id="138624" label="CHST10" cy:nodeId="108013">
    <graphics y="-1538.532199050198" z="0.0" x="1109.614429245476"/>
  </node>
</graph>
