# Supplementary material for: A systems-based framework to computationally describe putative transcription factors and signaling pathways regulating glycan biosynthesis
Source: publisher site journal article supplement (doi:10.3762/bjoc.17.119), 2021-07-22
Supplement: Additional file 2 [file 1860-5397-17-119-S2.cys › CytoscapeSession-2021_03_21-12_01/views/117847-143713-MESO.xgmml]

<?xml version="1.0" encoding="UTF-8" standalone="yes"?>
<graph id="143713" label="MESO" cy:view="1" cy:networkId="117847" cy:visualStyle="default" cy:rendererId="org.cytoscape.ding" cy:documentVersion="3.0" xmlns:dc="http://purl.org/dc/elements/1.1/" xmlns:xlink="http://www.w3.org/1999/xlink" xmlns:rdf="http://www.w3.org/1999/02/22-rdf-syntax-ns#" xmlns:cy="http://www.cytoscape.org" xmlns="http://www.cs.rpi.edu/XGMML">
  <graphics>
    <att name="NETWORK_NODE_SELECTION" value="true" type="string" cy:type="String"/>
    <att name="NETWORK_CENTER_X_LOCATION" value="480.0349426269531" type="string" cy:type="String"/>
    <att name="NETWORK_HEIGHT" value="510.0" type="string" cy:type="String"/>
    <att name="NETWORK_TITLE" value="MESO" type="string" cy:type="String"/>
    <att name="NETWORK_EDGE_SELECTION" value="true" type="string" cy:type="String"/>
    <att name="NETWORK_CENTER_Y_LOCATION" value="-287.5235595703125" type="string" cy:type="String"/>
    <att name="NETWORK_WIDTH" value="1312.0" type="string" cy:type="String"/>
    <att name="NETWORK_DEPTH" value="0.0" type="string" cy:type="String"/>
    <att name="NETWORK_SCALE_FACTOR" value="0.13255018867147556" type="string" cy:type="String"/>
    <att name="NETWORK_ANNOTATION_SELECTION" value="false" type="string" cy:type="String"/>
    <att name="NETWORK_CENTER_Z_LOCATION" value="0.0" type="string" cy:type="String"/>
  </graphics>
  <node id="143850" label="ALG10" cy:nodeId="105711">
    <graphics y="740.328138028955" z="0.0" x="175.37374684059546"/>
  </node>
  <node id="143748" label="FKTN" cy:nodeId="105713">
    <graphics y="-1018.6224263555055" z="0.0" x="-152.9695759133108"/>
  </node>
  <node id="143878" label="MAN1A1" cy:nodeId="105716">
    <graphics y="-1341.1005566960816" z="0.0" x="-104.78305247581079"/>
  </node>
  <node id="143870" label="ATF5" cy:nodeId="111091">
    <graphics y="681.4932543390746" z="0.0" x="-677.2646198586233"/>
  </node>
  <node id="143882" label="CSGALNACT2" cy:nodeId="105715">
    <graphics y="-822.0034039861207" z="0.0" x="118.8215732260935"/>
  </node>
  <node id="143741" label="RFX7" cy:nodeId="105974">
    <graphics y="-1236.4975751286988" z="0.0" x="-635.7185535744436"/>
  </node>
  <node id="143860" label="CHST11" cy:nodeId="105718">
    <graphics y="-491.8586743718629" z="0.0" x="569.8440074607126"/>
  </node>
  <node id="143744" label="PRDM4" cy:nodeId="108021">
    <graphics y="-1378.0883191472535" z="0.0" x="683.6747569724314"/>
  </node>
  <node id="143858" label="CHSY1" cy:nodeId="105717">
    <graphics y="-408.8747876531129" z="0.0" x="395.22926136696265"/>
  </node>
  <node id="143740" label="RUNX1" cy:nodeId="105978">
    <graphics y="-582.3705457097535" z="0.0" x="379.91615101540015"/>
  </node>
  <node id="143863" label="BATF" cy:nodeId="105721">
    <graphics y="1571.0025011652465" z="0.0" x="-445.28412059104517"/>
  </node>
  <node id="143869" label="MGAT1" cy:nodeId="105724">
    <graphics y="821.8448473566527" z="0.0" x="-717.4177265480764"/>
  </node>
  <node id="143803" label="PIGA" cy:nodeId="108027">
    <graphics y="-125.89035161795664" z="0.0" x="169.03676411354468"/>
  </node>
  <node id="143861" label="BATF3" cy:nodeId="105723">
    <graphics y="-341.6513989812379" z="0.0" x="681.1115855857126"/>
  </node>
  <node id="143736" label="RUNX3" cy:nodeId="105982">
    <graphics y="-81.13693364920664" z="0.0" x="1584.6640758200876"/>
  </node>
  <node id="143739" label="RUNX2" cy:nodeId="105981">
    <graphics y="-221.26254400076914" z="0.0" x="1293.6432017966501"/>
  </node>
  <node id="143856" label="BCAT1" cy:nodeId="105725">
    <graphics y="1047.4902941339965" z="0.0" x="633.8124293967478"/>
  </node>
  <node id="143837" label="AGA" cy:nodeId="114944">
    <graphics y="1038.1927172296996" z="0.0" x="-64.45487407004907"/>
  </node>
  <node id="143826" label="ALG10B" cy:nodeId="105727">
    <graphics y="493.7976671808715" z="0.0" x="200.4121837302439"/>
  </node>
  <node id="143880" label="UGCG" cy:nodeId="105985">
    <graphics y="-841.8525708562379" z="0.0" x="-153.65391734397485"/>
  </node>
  <node id="143772" label="SLC35E3" cy:nodeId="105732">
    <graphics y="-1255.178300226355" z="0.0" x="512.9372386618845"/>
  </node>
  <node id="143849" label="C17orf49" cy:nodeId="105736">
    <graphics y="426.12152353463125" z="0.0" x="-817.2524891213186"/>
  </node>
  <node id="143855" label="GCNT1" cy:nodeId="108552">
    <graphics y="1038.1927172296996" z="0.0" x="534.2456035300486"/>
  </node>
  <node id="143873" label="GANAB" cy:nodeId="105998">
    <graphics y="-1366.115998590613" z="0.0" x="-376.59602549827173"/>
  </node>
  <node id="143845" label="CBX4" cy:nodeId="105743">
    <graphics y="448.92737451729727" z="0.0" x="495.9220714255564"/>
  </node>
  <node id="143730" label="STAT2" cy:nodeId="106001">
    <graphics y="342.1663653009887" z="0.0" x="336.549421279072"/>
  </node>
  <node id="143788" label="GALNT6" cy:nodeId="108561">
    <graphics y="401.92565790352774" z="0.0" x="-75.85659983909204"/>
  </node>
  <node id="143831" label="E2F3" cy:nodeId="107284">
    <graphics y="-1004.6019338017945" z="0.0" x="537.7965221091501"/>
  </node>
  <node id="143853" label="MAN2A2" cy:nodeId="105748">
    <graphics y="-764.9697583562379" z="0.0" x="-480.6929188088186"/>
  </node>
  <node id="143752" label="ST3GAL3" cy:nodeId="105747">
    <graphics y="1471.0025011652465" z="0.0" x="-146.15046885764673"/>
  </node>
  <node id="143754" label="GAL3ST2" cy:nodeId="107283">
    <graphics y="-707.0949414617066" z="0.0" x="34.627378432392334"/>
  </node>
  <node id="143727" label="TCF12" cy:nodeId="106007">
    <graphics y="-1403.9611218816285" z="0.0" x="-285.8325672463186"/>
  </node>
  <node id="143789" label="NAGA" cy:nodeId="108567">
    <graphics y="299.95046869454336" z="0.0" x="-248.53607371604517"/>
  </node>
  <node id="143808" label="GALK1" cy:nodeId="105753">
    <graphics y="1571.0025011652465" z="0.0" x="-46.15046885764673"/>
  </node>
  <node id="143725" label="ALG5" cy:nodeId="106012">
    <graphics y="1471.0025011652465" z="0.0" x="53.41635700905249"/>
  </node>
  <node id="143726" label="TDRD3" cy:nodeId="106011">
    <graphics y="1461.7049242609496" z="0.0" x="-46.15046885764673"/>
  </node>
  <node id="143763" label="GALNT1" cy:nodeId="106014">
    <graphics y="-13.94949468436289" z="0.0" x="386.12708851540015"/>
  </node>
  <node id="143774" label="DPM2" cy:nodeId="105758">
    <graphics y="255.48454157051992" z="0.0" x="-545.0353489235647"/>
  </node>
  <node id="143724" label="TEAD1" cy:nodeId="106013">
    <graphics y="-920.7558606511598" z="0.0" x="-296.63838389670923"/>
  </node>
  <node id="143834" label="E2F2" cy:nodeId="108573">
    <graphics y="-1866.8038648015504" z="0.0" x="317.26103016579077"/>
  </node>
  <node id="143776" label="PIGQ" cy:nodeId="105759">
    <graphics y="1580.3000780695434" z="0.0" x="652.1168346091501"/>
  </node>
  <node id="143829" label="E2F8" cy:nodeId="108575">
    <graphics y="-1550.5984815007691" z="0.0" x="-406.7966480568655"/>
  </node>
  <node id="143719" label="TRIM28" cy:nodeId="106018">
    <graphics y="-15.23013433280039" z="0.0" x="691.8398570700876"/>
  </node>
  <node id="143816" label="FOXK1" cy:nodeId="107298">
    <graphics y="1461.7049242609496" z="0.0" x="-844.4177723244436"/>
  </node>
  <node id="143833" label="MOGS" cy:nodeId="105762">
    <graphics y="-1987.8483594304566" z="0.0" x="368.92948719704077"/>
  </node>
  <node id="143798" label="MFNG" cy:nodeId="105766">
    <graphics y="1143.976774846887" z="0.0" x="-807.3827305153616"/>
  </node>
  <node id="143862" label="NAGK" cy:nodeId="105765">
    <graphics y="1580.3000780695434" z="0.0" x="-345.71729472434595"/>
  </node>
  <node id="143865" label="UGP2" cy:nodeId="108584">
    <graphics y="1199.3501268976684" z="0.0" x="-306.6077366188772"/>
  </node>
  <node id="143728" label="SLC35A4" cy:nodeId="108586">
    <graphics y="1461.7049242609496" z="0.0" x="552.5500087424509"/>
  </node>
  <node id="143716" label="YAP1" cy:nodeId="106026">
    <graphics y="1571.0025011652465" z="0.0" x="-245.71729472434595"/>
  </node>
  <node id="143717" label="XRN2" cy:nodeId="106025">
    <graphics y="-787.5383008367066" z="0.0" x="-85.80325511252954"/>
  </node>
  <node id="143778" label="NDST2" cy:nodeId="105772">
    <graphics y="-228.49728521170664" z="0.0" x="790.1537608786814"/>
  </node>
  <node id="143817" label="GALNT5" cy:nodeId="106027">
    <graphics y="-2128.128205621863" z="0.0" x="-293.787248642803"/>
  </node>
  <node id="143721" label="GAL3ST3" cy:nodeId="108590">
    <graphics y="1038.1927172296996" z="0.0" x="-406.6077366188772"/>
  </node>
  <node id="143790" label="NAAA" cy:nodeId="107310">
    <graphics y="247.46328607735586" z="0.0" x="-101.91040232932642"/>
  </node>
  <node id="143842" label="CHD8" cy:nodeId="105774">
    <graphics y="-1075.0516560918336" z="0.0" x="90.10327240669653"/>
  </node>
  <node id="143843" label="CHD4" cy:nodeId="105773">
    <graphics y="-1428.7508557683473" z="0.0" x="-471.61131480491235"/>
  </node>
  <node id="143844" label="LAMP3" cy:nodeId="105776">
    <graphics y="338.6112963312621" z="0.0" x="454.375837294697"/>
  </node>
  <node id="143841" label="CIITA" cy:nodeId="105775">
    <graphics y="607.353453313684" z="0.0" x="64.1380138083689"/>
  </node>
  <node id="143801" label="HOXA1" cy:nodeId="108596">
    <graphics y="1580.3000780695434" z="0.0" x="452.5500087424509"/>
  </node>
  <node id="143756" label="SULT1A2" cy:nodeId="117555">
    <graphics y="1471.0025011652465" z="0.0" x="452.5500087424509"/>
  </node>
  <node id="143813" label="B4GALNT4" cy:nodeId="105784">
    <graphics y="1038.1927172296996" z="0.0" x="135.11195179665015"/>
  </node>
  <node id="143773" label="MBD4" cy:nodeId="108599">
    <graphics y="-1245.3861859685426" z="0.0" x="636.8394298239939"/>
  </node>
  <node id="143867" label="POMGNT1" cy:nodeId="105783">
    <graphics y="715.2849108332152" z="0.0" x="-563.0679302529104"/>
  </node>
  <node id="143838" label="CREB3" cy:nodeId="105786">
    <graphics y="1047.4902941339965" z="0.0" x="35.111951796650146"/>
  </node>
  <node id="143775" label="MBD3" cy:nodeId="107323">
    <graphics y="234.53425470528555" z="0.0" x="-425.19879344260767"/>
  </node>
  <node id="143769" label="B4GALT3" cy:nodeId="105789">
    <graphics y="1461.7049242609496" z="0.0" x="-644.8509464577444"/>
  </node>
  <node id="143770" label="MEF2D" cy:nodeId="107325">
    <graphics y="1471.0025011652465" z="0.0" x="-545.2841205910452"/>
  </node>
  <node id="143830" label="POFUT1" cy:nodeId="105792">
    <graphics y="-1040.754378641272" z="0.0" x="405.9665050193064"/>
  </node>
  <node id="143731" label="NEU4" cy:nodeId="113217">
    <graphics y="1461.7049242609496" z="0.0" x="153.4163570090525"/>
  </node>
  <node id="143836" label="DEK" cy:nodeId="105795">
    <graphics y="-580.0597852117066" z="0.0" x="152.23782917702124"/>
  </node>
  <node id="143722" label="FUT1" cy:nodeId="105802">
    <graphics y="1199.3501268976684" z="0.0" x="-548.7605991677053"/>
  </node>
  <node id="143734" label="SNAPC1" cy:nodeId="108618">
    <graphics y="1571.0025011652465" z="0.0" x="-844.4177723244436"/>
  </node>
  <node id="143732" label="SOX11" cy:nodeId="108619">
    <graphics y="1471.0025011652465" z="0.0" x="252.9831828757517"/>
  </node>
  <node id="143832" label="ST3GAL2" cy:nodeId="105806">
    <graphics y="-1680.642609918738" z="0.0" x="268.98988148415015"/>
  </node>
  <node id="143757" label="NFE2" cy:nodeId="113229">
    <graphics y="1461.7049242609496" z="0.0" x="352.9831828757517"/>
  </node>
  <node id="143729" label="TAF7" cy:nodeId="108623">
    <graphics y="1471.0025011652465" z="0.0" x="652.1168346091501"/>
  </node>
  <node id="143737" label="TPST1" cy:nodeId="105809">
    <graphics y="-106.41323980155039" z="0.0" x="1322.4036998435251"/>
  </node>
  <node id="143718" label="TRRAP" cy:nodeId="108628">
    <graphics y="-1426.380402887488" z="0.0" x="149.02630039894507"/>
  </node>
  <node id="143881" label="AHR" cy:nodeId="106836">
    <graphics y="-671.6926587468629" z="0.0" x="-241.66841319358423"/>
  </node>
  <node id="143859" label="TPST2" cy:nodeId="106840">
    <graphics y="-266.61105474295664" z="0.0" x="999.6898936911814"/>
  </node>
  <node id="143764" label="SLC35E1" cy:nodeId="106844">
    <graphics y="37.28280512032461" z="0.0" x="503.93925282204077"/>
  </node>
  <node id="143854" label="BRD4" cy:nodeId="106843">
    <graphics y="-795.3269208318238" z="0.0" x="-290.06245616233423"/>
  </node>
  <node id="143847" label="LFNG" cy:nodeId="106846">
    <graphics y="-187.0266431218629" z="0.0" x="1523.4693736716501"/>
  </node>
  <node id="143806" label="HEXIM1" cy:nodeId="112221">
    <graphics y="1580.3000780695434" z="0.0" x="-545.2841205910452"/>
  </node>
  <node id="143848" label="CBFA2T3" cy:nodeId="106845">
    <graphics y="-223.08554204764414" z="0.0" x="1681.9395885154001"/>
  </node>
  <node id="143827" label="COG3" cy:nodeId="105823">
    <graphics y="248.05450311837149" z="0.0" x="225.32897755348608"/>
  </node>
  <node id="143760" label="NCAPG2" cy:nodeId="117858">
    <graphics y="-305.1701978093629" z="0.0" x="583.3094005271189"/>
  </node>
  <node id="143825" label="ELK3" cy:nodeId="105826">
    <graphics y="-729.7226575261598" z="0.0" x="236.45321461403296"/>
  </node>
  <node id="143802" label="HJURP" cy:nodeId="117857">
    <graphics y="-635.3041699773316" z="0.0" x="-134.56201365745142"/>
  </node>
  <node id="143828" label="ELF2" cy:nodeId="105825">
    <graphics y="369.1719347589965" z="0.0" x="213.05343434059546"/>
  </node>
  <node id="143839" label="CLOCK" cy:nodeId="106849">
    <graphics y="-1238.6627667790895" z="0.0" x="103.65399995291159"/>
  </node>
  <node id="143747" label="NR2F6" cy:nodeId="117859">
    <graphics y="571.2244631403441" z="0.0" x="-844.4177723244436"/>
  </node>
  <node id="143822" label="XYLT1" cy:nodeId="106854">
    <graphics y="-1966.7922070867066" z="0.0" x="-660.9864368752249"/>
  </node>
  <node id="143824" label="ERG" cy:nodeId="105832">
    <graphics y="-2029.6290601140504" z="0.0" x="-562.7810535744436"/>
  </node>
  <node id="143840" label="ST8SIA4" cy:nodeId="105834">
    <graphics y="575.2955462091918" z="0.0" x="-60.92001536643579"/>
  </node>
  <node id="143823" label="CHSY3" cy:nodeId="105833">
    <graphics y="-2104.9264233953004" z="0.0" x="-467.5981922463186"/>
  </node>
  <node id="143791" label="MGAT4A" cy:nodeId="106860">
    <graphics y="414.73242059884024" z="0.0" x="-325.19879344260767"/>
  </node>
  <node id="143821" label="UST" cy:nodeId="105836">
    <graphics y="-2155.347199762488" z="0.0" x="-647.5342884377249"/>
  </node>
  <node id="143814" label="FUS" cy:nodeId="106862">
    <graphics y="1047.4902941339965" z="0.0" x="234.67877766334936"/>
  </node>
  <node id="143738" label="CHST15" cy:nodeId="106861">
    <graphics y="-323.1387036687379" z="0.0" x="1351.2957896872751"/>
  </node>
  <node id="143810" label="GPI" cy:nodeId="106864">
    <graphics y="1580.3000780695434" z="0.0" x="252.9831828757517"/>
  </node>
  <node id="143811" label="GAPDH" cy:nodeId="106863">
    <graphics y="1571.0025011652465" z="0.0" x="153.4163570090525"/>
  </node>
  <node id="143819" label="ETS1" cy:nodeId="105839">
    <graphics y="-306.99740728201914" z="0.0" x="394.56266590797827"/>
  </node>
  <node id="143818" label="ETV1" cy:nodeId="105842">
    <graphics y="-2018.2467358953004" z="0.0" x="-380.088762314678"/>
  </node>
  <node id="143809" label="GPS2" cy:nodeId="106865">
    <graphics y="1580.3000780695434" z="0.0" x="53.41635700905249"/>
  </node>
  <node id="143846" label="HS3ST3B1" cy:nodeId="105841">
    <graphics y="-237.3435376531129" z="0.0" x="1804.4876842185251"/>
  </node>
  <node id="143715" label="EXTL2" cy:nodeId="105844">
    <graphics y="1580.3000780695434" z="0.0" x="-146.15046885764673"/>
  </node>
  <node id="143733" label="MGAT2" cy:nodeId="106868">
    <graphics y="1580.3000780695434" z="0.0" x="-744.8509464577444"/>
  </node>
  <node id="143805" label="XYLT2" cy:nodeId="109684">
    <graphics y="1571.0025011652465" z="0.0" x="-644.8509464577444"/>
  </node>
  <node id="143804" label="HIF1A" cy:nodeId="106867">
    <graphics y="-242.54159673514414" z="0.0" x="254.44402882301733"/>
  </node>
  <node id="143800" label="SLC35B4" cy:nodeId="105845">
    <graphics y="1571.0025011652465" z="0.0" x="352.9831828757517"/>
  </node>
  <node id="143795" label="IRF2" cy:nodeId="106871">
    <graphics y="231.10549799141836" z="0.0" x="526.3919810935251"/>
  </node>
  <node id="143723" label="TEAD2" cy:nodeId="109690">
    <graphics y="1118.7703844660277" z="0.0" x="-477.68531230247095"/>
  </node>
  <node id="143785" label="LEF1" cy:nodeId="106875">
    <graphics y="-1877.6202710515504" z="0.0" x="-579.1444568947561"/>
  </node>
  <node id="143820" label="GLCE" cy:nodeId="105851">
    <graphics y="-1830.506867731238" z="0.0" x="-445.7297840431936"/>
  </node>
  <node id="143768" label="MEIS3" cy:nodeId="106878">
    <graphics y="-1731.0583203679566" z="0.0" x="376.4517345114939"/>
  </node>
  <node id="143779" label="NPL" cy:nodeId="105860">
    <graphics y="-49.60672124686289" z="0.0" x="998.4813975974314"/>
  </node>
  <node id="143792" label="HK3" cy:nodeId="105859">
    <graphics y="526.5987688654418" z="0.0" x="-243.89001658713892"/>
  </node>
  <node id="143735" label="SIRT6" cy:nodeId="106885">
    <graphics y="381.93559900460195" z="0.0" x="-628.4902515724905"/>
  </node>
  <node id="143812" label="GABPA" cy:nodeId="105861">
    <graphics y="137.2828051203246" z="0.0" x="236.54942127907202"/>
  </node>
  <node id="143807" label="GTF2I" cy:nodeId="105871">
    <graphics y="-1342.7382825261598" z="0.0" x="-513.4974232033499"/>
  </node>
  <node id="143868" label="TSTA3" cy:nodeId="105880">
    <graphics y="517.1821123713012" z="0.0" x="-729.4321155861624"/>
  </node>
  <node id="143799" label="IKZF1" cy:nodeId="105882">
    <graphics y="1038.1927172296996" z="0.0" x="-844.4177723244436"/>
  </node>
  <node id="143797" label="INO80" cy:nodeId="105885">
    <graphics y="-872.4967206365113" z="0.0" x="-700.5248279885061"/>
  </node>
  <node id="143793" label="IRF8" cy:nodeId="105890">
    <graphics y="411.61437860665274" z="0.0" x="-179.49829295432642"/>
  </node>
  <node id="143787" label="JMJD1C" cy:nodeId="105892">
    <graphics y="-950.6082929021363" z="0.0" x="63.31676670753882"/>
  </node>
  <node id="143743" label="MGAT5" cy:nodeId="105893">
    <graphics y="-1440.9147656804566" z="0.0" x="802.3281383200876"/>
  </node>
  <node id="143857" label="FKRP" cy:nodeId="105896">
    <graphics y="-143.79745611014414" z="0.0" x="627.5204600974314"/>
  </node>
  <node id="143852" label="GNB1" cy:nodeId="105902">
    <graphics y="-624.3497632390504" z="0.0" x="-390.8298511818655"/>
  </node>
  <node id="143786" label="KDM5A" cy:nodeId="105904">
    <graphics y="619.1207720392699" z="0.0" x="187.68898579323218"/>
  </node>
  <node id="143745" label="GNS" cy:nodeId="105905">
    <graphics y="-1177.3935101872926" z="0.0" x="318.11002918922827"/>
  </node>
  <node id="143784" label="LMO2" cy:nodeId="105909">
    <graphics y="703.590758001184" z="0.0" x="-71.36587718284204"/>
  </node>
  <node id="143781" label="RENBP" cy:nodeId="105912">
    <graphics y="1361.7049242609496" z="0.0" x="-826.5619373635061"/>
  </node>
  <node id="143783" label="LYL1" cy:nodeId="105911">
    <graphics y="1264.1239306086059" z="0.0" x="-762.0662632302053"/>
  </node>
  <node id="143780" label="MAFB" cy:nodeId="105914">
    <graphics y="-164.7434399968629" z="0.0" x="936.6689586325876"/>
  </node>
  <node id="143777" label="MAZ" cy:nodeId="105916">
    <graphics y="1571.0025011652465" z="0.0" x="552.5500087424509"/>
  </node>
  <node id="143771" label="MED1" cy:nodeId="105924">
    <graphics y="-1299.3943799382691" z="0.0" x="-201.96617320334985"/>
  </node>
  <node id="143815" label="NDST1" cy:nodeId="105923">
    <graphics y="1471.0025011652465" z="0.0" x="-744.8509464577444"/>
  </node>
  <node id="143851" label="BTAF1" cy:nodeId="110789">
    <graphics y="850.8488070124145" z="0.0" x="164.1380138083689"/>
  </node>
  <node id="143866" label="BARX2" cy:nodeId="107975">
    <graphics y="1118.7703844660277" z="0.0" x="-235.53244975364282"/>
  </node>
  <node id="143767" label="MRE11A" cy:nodeId="105931">
    <graphics y="-1367.046204889441" z="0.0" x="-641.6071644142874"/>
  </node>
  <node id="143765" label="MYBL1" cy:nodeId="105934">
    <graphics y="-123.94625982108164" z="0.0" x="475.00883290016577"/>
  </node>
  <node id="143766" label="MXD3" cy:nodeId="105933">
    <graphics y="938.1927172296996" z="0.0" x="-736.8325214699514"/>
  </node>
  <node id="143762" label="MYBL2" cy:nodeId="105935">
    <graphics y="1038.1927172296996" z="0.0" x="334.67877766334936"/>
  </node>
  <node id="143794" label="SGSH" cy:nodeId="110804">
    <graphics y="137.2828051203246" z="0.0" x="589.2415294333689"/>
  </node>
  <node id="143761" label="B4GALNT1" cy:nodeId="107990">
    <graphics y="1047.4902941339965" z="0.0" x="434.2456035300486"/>
  </node>
  <node id="143864" label="GALK2" cy:nodeId="110806">
    <graphics y="1038.1927172296996" z="0.0" x="-164.45487407004907"/>
  </node>
  <node id="143887" label="AFF4" cy:nodeId="105686">
    <graphics y="-998.5926717168336" z="0.0" x="-248.89052012717798"/>
  </node>
  <node id="143782" label="FUT7" cy:nodeId="105685">
    <graphics y="1292.8882738703246" z="0.0" x="-648.7605991677053"/>
  </node>
  <node id="143885" label="STT3B" cy:nodeId="105688">
    <graphics y="-947.8037503606324" z="0.0" x="-71.81573680198267"/>
  </node>
  <node id="143750" label="NR1H3" cy:nodeId="110807">
    <graphics y="137.2828051203246" z="0.0" x="-47.08188060081079"/>
  </node>
  <node id="143759" label="NFAT5" cy:nodeId="105943">
    <graphics y="1461.7049242609496" z="0.0" x="-445.28412059104517"/>
  </node>
  <node id="143886" label="MAN1A2" cy:nodeId="105687">
    <graphics y="-1054.7310684567933" z="0.0" x="-346.50337413108423"/>
  </node>
  <node id="143753" label="NFYC" cy:nodeId="105946">
    <graphics y="1461.7049242609496" z="0.0" x="-245.71729472434595"/>
  </node>
  <node id="143876" label="FUT11" cy:nodeId="105690">
    <graphics y="-1077.825393045569" z="0.0" x="-41.442064316631104"/>
  </node>
  <node id="143755" label="NFIC" cy:nodeId="105945">
    <graphics y="-868.7762006169801" z="0.0" x="1.6249675437204587"/>
  </node>
  <node id="143884" label="NEU3" cy:nodeId="105689">
    <graphics y="-1265.59602483573" z="0.0" x="-449.12681773459985"/>
  </node>
  <node id="143758" label="COG5" cy:nodeId="105692">
    <graphics y="1471.0025011652465" z="0.0" x="-345.71729472434595"/>
  </node>
  <node id="143751" label="NIPBL" cy:nodeId="105947">
    <graphics y="-880.6994031316285" z="0.0" x="-544.2838001564749"/>
  </node>
  <node id="143874" label="ACER2" cy:nodeId="105691">
    <graphics y="-1019.7090810185914" z="0.0" x="-514.3187122658499"/>
  </node>
  <node id="143871" label="SLC35D1" cy:nodeId="105950">
    <graphics y="-1231.9633801824098" z="0.0" x="-262.9438953713186"/>
  </node>
  <node id="143883" label="MAN2A1" cy:nodeId="105694">
    <graphics y="-941.7206281072145" z="0.0" x="-433.9900379494436"/>
  </node>
  <node id="143749" label="NR2C2" cy:nodeId="105949">
    <graphics y="-1104.1495870000367" z="0.0" x="-137.76744273459985"/>
  </node>
  <node id="143875" label="SLC35F5" cy:nodeId="105696">
    <graphics y="-1143.973176324988" z="0.0" x="-430.1707020119436"/>
  </node>
  <node id="143720" label="TOP2B" cy:nodeId="110815">
    <graphics y="-1499.5104077703004" z="0.0" x="-65.27539256370142"/>
  </node>
  <node id="143872" label="SLC35A3" cy:nodeId="105695">
    <graphics y="-1165.4658215886598" z="0.0" x="20.231687514423584"/>
  </node>
  <node id="143746" label="PHF20" cy:nodeId="105956">
    <graphics y="-1091.9303868657594" z="0.0" x="203.2947063132517"/>
  </node>
  <node id="143796" label="RTF1" cy:nodeId="105700">
    <graphics y="-837.400208795691" z="0.0" x="-844.4177723244436"/>
  </node>
  <node id="143879" label="ATF1" cy:nodeId="105701">
    <graphics y="-1215.0312054997926" z="0.0" x="-74.45775035178735"/>
  </node>
  <node id="143877" label="ATF2" cy:nodeId="105704">
    <graphics y="-1122.621400201941" z="0.0" x="-267.95869639670923"/>
  </node>
  <node id="143742" label="RAC3" cy:nodeId="105964">
    <graphics y="137.2828051203246" z="0.0" x="-574.2615948036917"/>
  </node>
  <node id="143835" label="B3GNT5" cy:nodeId="105707">
    <graphics y="-451.4867261296754" z="0.0" x="107.35253521644995"/>
  </node>
</graph>
