# Supplementary material for: A systems-based framework to computationally describe putative transcription factors and signaling pathways regulating glycan biosynthesis
Source: publisher site journal article supplement (doi:10.3762/bjoc.17.119), 2021-07-22
Supplement: Additional file 2 [file 1860-5397-17-119-S2.cys › CytoscapeSession-2021_03_21-12_01/views/118033-144061-OV.xgmml]

<?xml version="1.0" encoding="UTF-8" standalone="yes"?>
<graph id="144061" label="OV" cy:view="1" cy:networkId="118033" cy:visualStyle="default" cy:rendererId="org.cytoscape.ding" cy:documentVersion="3.0" xmlns:dc="http://purl.org/dc/elements/1.1/" xmlns:xlink="http://www.w3.org/1999/xlink" xmlns:rdf="http://www.w3.org/1999/02/22-rdf-syntax-ns#" xmlns:cy="http://www.cytoscape.org" xmlns="http://www.cs.rpi.edu/XGMML">
  <graphics>
    <att name="NETWORK_NODE_SELECTION" value="true" type="string" cy:type="String"/>
    <att name="NETWORK_CENTER_X_LOCATION" value="482.51654052734375" type="string" cy:type="String"/>
    <att name="NETWORK_HEIGHT" value="510.0" type="string" cy:type="String"/>
    <att name="NETWORK_TITLE" value="OV" type="string" cy:type="String"/>
    <att name="NETWORK_EDGE_SELECTION" value="true" type="string" cy:type="String"/>
    <att name="NETWORK_CENTER_Y_LOCATION" value="-173.5931396484375" type="string" cy:type="String"/>
    <att name="NETWORK_WIDTH" value="1312.0" type="string" cy:type="String"/>
    <att name="NETWORK_DEPTH" value="0.0" type="string" cy:type="String"/>
    <att name="NETWORK_SCALE_FACTOR" value="0.10003609679452939" type="string" cy:type="String"/>
    <att name="NETWORK_ANNOTATION_SELECTION" value="false" type="string" cy:type="String"/>
    <att name="NETWORK_CENTER_Z_LOCATION" value="0.0" type="string" cy:type="String"/>
  </graphics>
  <node id="144141" label="NOTCH1" cy:nodeId="108016">
    <graphics y="-793.3738843279812" z="0.0" x="1499.6049529066695"/>
  </node>
  <node id="144119" label="RBBP5" cy:nodeId="105967">
    <graphics y="-635.532545216653" z="0.0" x="-58.89908304303765"/>
  </node>
  <node id="144117" label="RCOR1" cy:nodeId="105969">
    <graphics y="628.0393847149876" z="0.0" x="-894.314701939522"/>
  </node>
  <node id="144113" label="PIGB" cy:nodeId="108020">
    <graphics y="2079.112317912009" z="0.0" x="-599.5356644639361"/>
  </node>
  <node id="144115" label="RFX1" cy:nodeId="105971">
    <graphics y="591.8123339337376" z="0.0" x="-538.2391251572955"/>
  </node>
  <node id="144114" label="RFX7" cy:nodeId="105974">
    <graphics y="2088.409894816306" z="0.0" x="-499.96883859723687"/>
  </node>
  <node id="144121" label="PRDM4" cy:nodeId="108021">
    <graphics y="891.4297655743626" z="0.0" x="-703.777592564522"/>
  </node>
  <node id="144118" label="COG2" cy:nodeId="105973">
    <graphics y="-600.6297742205593" z="0.0" x="53.04012594133735"/>
  </node>
  <node id="144207" label="FPGT" cy:nodeId="105976">
    <graphics y="1867.261035792258" z="0.0" x="69.76963338762641"/>
  </node>
  <node id="144112" label="RNF2" cy:nodeId="105975">
    <graphics y="-507.5391980486843" z="0.0" x="88.3448744764936"/>
  </node>
  <node id="144275" label="POMT2" cy:nodeId="108023">
    <graphics y="766.8990648907688" z="0.0" x="-781.5963181504595"/>
  </node>
  <node id="144109" label="RUNX1" cy:nodeId="105978">
    <graphics y="-2326.876783497903" z="0.0" x="112.28455648332954"/>
  </node>
  <node id="144105" label="SCML2" cy:nodeId="108025">
    <graphics y="-134.91523564634053" z="0.0" x="1474.9527007094039"/>
  </node>
  <node id="144094" label="SRC" cy:nodeId="108028">
    <graphics y="-647.5735856371853" z="0.0" x="1376.7820998182906"/>
  </node>
  <node id="144236" label="SULF2" cy:nodeId="105979">
    <graphics y="-2051.4223157244655" z="0.0" x="519.3904677382124"/>
  </node>
  <node id="144106" label="RUNX2" cy:nodeId="105981">
    <graphics y="-2091.499727376077" z="0.0" x="416.6697951307905"/>
  </node>
  <node id="144102" label="SIN3A" cy:nodeId="105984">
    <graphics y="-1158.804487355325" z="0.0" x="1197.3790541639937"/>
  </node>
  <node id="144135" label="B3GNT9" cy:nodeId="108032">
    <graphics y="-1933.8023969012233" z="0.0" x="992.3503981581342"/>
  </node>
  <node id="144306" label="B3GALT5" cy:nodeId="108034">
    <graphics y="2197.707471720603" z="0.0" x="-899.1024903306353"/>
  </node>
  <node id="144098" label="SLC35E4" cy:nodeId="111112">
    <graphics y="2188.409894816306" z="0.0" x="-0.8351868638384303"/>
  </node>
  <node id="144093" label="SRCAP" cy:nodeId="105994">
    <graphics y="1663.5572222394017" z="0.0" x="-198.3481949815142"/>
  </node>
  <node id="144066" label="ALG9" cy:nodeId="108554">
    <graphics y="2079.112317912009" z="0.0" x="-0.8351868638384303"/>
  </node>
  <node id="144177" label="DDOST" cy:nodeId="108555">
    <graphics y="500.73036371889384" z="0.0" x="10.768611048759226"/>
  </node>
  <node id="144110" label="PIGC" cy:nodeId="108558">
    <graphics y="-401.79060185727803" z="0.0" x="174.2467299452436"/>
  </node>
  <node id="144185" label="HPSE" cy:nodeId="106000">
    <graphics y="-1585.4376660662624" z="0.0" x="-699.7547043809283"/>
  </node>
  <node id="144092" label="STAT1" cy:nodeId="105999">
    <graphics y="-1415.7345410662624" z="0.0" x="-896.493168736397"/>
  </node>
  <node id="144091" label="STAT2" cy:nodeId="106001">
    <graphics y="1392.6792620343235" z="0.0" x="-149.48528757184624"/>
  </node>
  <node id="144088" label="SUMO2" cy:nodeId="106004">
    <graphics y="1758.8990038556126" z="0.0" x="-889.0183915147173"/>
  </node>
  <node id="144082" label="TAF1" cy:nodeId="106006">
    <graphics y="-956.8464185076687" z="0.0" x="552.5360060682905"/>
  </node>
  <node id="144085" label="COG1" cy:nodeId="106005">
    <graphics y="1846.532869212058" z="0.0" x="-961.359608555733"/>
  </node>
  <node id="144190" label="NAGA" cy:nodeId="108567">
    <graphics y="-2403.123548634622" z="0.0" x="-360.5653733262408"/>
  </node>
  <node id="144081" label="TCF12" cy:nodeId="106007">
    <graphics y="-899.547193654153" z="0.0" x="1195.2505446425093"/>
  </node>
  <node id="144080" label="TCF7L1" cy:nodeId="106009">
    <graphics y="-525.4517804461452" z="0.0" x="1528.0023528090132"/>
  </node>
  <node id="144075" label="TTF2" cy:nodeId="106019">
    <graphics y="2088.409894816306" z="0.0" x="497.8652907362592"/>
  </node>
  <node id="144071" label="USF2" cy:nodeId="106022">
    <graphics y="2188.409894816306" z="0.0" x="-399.96883859723687"/>
  </node>
  <node id="144227" label="EZH2" cy:nodeId="108582">
    <graphics y="60.04756342592509" z="0.0" x="1335.8300124159468"/>
  </node>
  <node id="144073" label="USF1" cy:nodeId="106021">
    <graphics y="2188.409894816306" z="0.0" x="-599.5356644639361"/>
  </node>
  <node id="144068" label="WDR5" cy:nodeId="106024">
    <graphics y="1353.2163494748143" z="0.0" x="-739.532119656502"/>
  </node>
  <node id="144079" label="CHPF" cy:nodeId="108583">
    <graphics y="-434.46182072934835" z="0.0" x="1583.778785800041"/>
  </node>
  <node id="144067" label="YAP1" cy:nodeId="106026">
    <graphics y="2088.409894816306" z="0.0" x="98.73163900286079"/>
  </node>
  <node id="144239" label="GALNT5" cy:nodeId="106027">
    <graphics y="-2044.3293591814968" z="0.0" x="66.78388509661079"/>
  </node>
  <node id="144065" label="ZBTB17" cy:nodeId="106029">
    <graphics y="541.9752367657688" z="0.0" x="-120.77655496686577"/>
  </node>
  <node id="144064" label="ZBTB33" cy:nodeId="106031">
    <graphics y="2188.409894816306" z="0.0" x="597.8652907362592"/>
  </node>
  <node id="144179" label="PPBP" cy:nodeId="113214">
    <graphics y="2079.112317912009" z="0.0" x="-399.96883859723687"/>
  </node>
  <node id="144133" label="GALNT9" cy:nodeId="108605">
    <graphics y="-2007.0138379412624" z="0.0" x="877.6338454237592"/>
  </node>
  <node id="144220" label="FOXP1" cy:nodeId="113218">
    <graphics y="-2552.408552296731" z="0.0" x="52.42728719622016"/>
  </node>
  <node id="144099" label="SMARCB1" cy:nodeId="108617">
    <graphics y="2197.707471720603" z="0.0" x="98.73163900286079"/>
  </node>
  <node id="144090" label="SUMO1" cy:nodeId="112231">
    <graphics y="2188.409894816306" z="0.0" x="198.7316390028608"/>
  </node>
  <node id="144280" label="ALG2" cy:nodeId="109671">
    <graphics y="1446.9195955914524" z="0.0" x="-998.6693161973345"/>
  </node>
  <node id="144216" label="GATA3" cy:nodeId="109677">
    <graphics y="-1983.7548657732937" z="0.0" x="-120.20132913678765"/>
  </node>
  <node id="144095" label="XYLT2" cy:nodeId="109684">
    <graphics y="2188.409894816306" z="0.0" x="-200.40201273053765"/>
  </node>
  <node id="144295" label="BCOR" cy:nodeId="110788">
    <graphics y="-1270.3583203631374" z="0.0" x="1415.566355799736"/>
  </node>
  <node id="144246" label="ESRRA" cy:nodeId="110794">
    <graphics y="1780.8896959942845" z="0.0" x="-597.6434220322955"/>
  </node>
  <node id="144309" label="AFF4" cy:nodeId="105686">
    <graphics y="2079.112317912009" z="0.0" x="198.7316390028608"/>
  </node>
  <node id="144273" label="FUT7" cy:nodeId="105685">
    <graphics y="-2016.8473645525905" z="0.0" x="-470.4713791856158"/>
  </node>
  <node id="144265" label="STT3B" cy:nodeId="105688">
    <graphics y="-1190.9869824725124" z="0.0" x="240.34765157610298"/>
  </node>
  <node id="144074" label="MAN1A2" cy:nodeId="105687">
    <graphics y="2079.112317912009" z="0.0" x="398.29846486956"/>
  </node>
  <node id="144298" label="NEU3" cy:nodeId="105689">
    <graphics y="1221.8309191388157" z="0.0" x="-431.51519479840874"/>
  </node>
  <node id="144214" label="COG5" cy:nodeId="105692">
    <graphics y="-1158.7821484881374" z="0.0" x="-291.3103653141844"/>
  </node>
  <node id="144172" label="ACER2" cy:nodeId="105691">
    <graphics y="2079.112317912009" z="0.0" x="597.8652907362592"/>
  </node>
  <node id="144308" label="MAN2A1" cy:nodeId="105694">
    <graphics y="2088.409894816306" z="0.0" x="298.29846486956"/>
  </node>
  <node id="144307" label="AR" cy:nodeId="105693">
    <graphics y="2188.409894816306" z="0.0" x="-998.6693161973345"/>
  </node>
  <node id="144225" label="GALNT10" cy:nodeId="105697">
    <graphics y="-2024.8751584368679" z="0.0" x="310.24368200212837"/>
  </node>
  <node id="144304" label="RTF1" cy:nodeId="105700">
    <graphics y="-1050.1438123064968" z="0.0" x="1045.0675612440718"/>
  </node>
  <node id="144305" label="ARID2" cy:nodeId="105699">
    <graphics y="-1179.8368970232937" z="0.0" x="882.2167311659467"/>
  </node>
  <node id="144111" label="SLC35A5" cy:nodeId="105702">
    <graphics y="-526.8602124529812" z="0.0" x="235.14757833391548"/>
  </node>
  <node id="144300" label="ATF1" cy:nodeId="105701">
    <graphics y="-1315.7345410662624" z="0.0" x="652.5360060682905"/>
  </node>
  <node id="144299" label="ATF2" cy:nodeId="105704">
    <graphics y="1143.3539599103" z="0.0" x="-510.32928171247124"/>
  </node>
  <node id="144205" label="UGGT1" cy:nodeId="105705">
    <graphics y="-853.0463696795437" z="0.0" x="-161.10150613874077"/>
  </node>
  <node id="144253" label="HAS1" cy:nodeId="105708">
    <graphics y="-2239.7900372820827" z="0.0" x="479.2961226454389"/>
  </node>
  <node id="144228" label="HAS2" cy:nodeId="105709">
    <graphics y="-2377.691908009622" z="0.0" x="249.54585180193305"/>
  </node>
  <node id="144116" label="FKTN" cy:nodeId="105713">
    <graphics y="551.5706347149876" z="0.0" x="-994.131596470772"/>
  </node>
  <node id="144233" label="MAN1A1" cy:nodeId="105716">
    <graphics y="-2168.810934193704" z="0.0" x="25.1643324843061"/>
  </node>
  <node id="144238" label="CSGALNACT2" cy:nodeId="105715">
    <graphics y="-2339.991331227395" z="0.0" x="-112.7323960313189"/>
  </node>
  <node id="144229" label="CHST11" cy:nodeId="105718">
    <graphics y="-2124.7050181704494" z="0.0" x="-90.4345444688189"/>
  </node>
  <node id="144151" label="CHSY1" cy:nodeId="105717">
    <graphics y="-763.9133435564968" z="0.0" x="1376.6933852186812"/>
  </node>
  <node id="144235" label="ST6GAL2" cy:nodeId="105720">
    <graphics y="-2440.032484181497" z="0.0" x="156.1526137343061"/>
  </node>
  <node id="144232" label="GFPT2" cy:nodeId="105719">
    <graphics y="-2150.559184201333" z="0.0" x="106.41352376848579"/>
  </node>
  <node id="144297" label="BATF3" cy:nodeId="105723">
    <graphics y="-1908.607496388528" z="0.0" x="-561.0958298692095"/>
  </node>
  <node id="144303" label="SLC35E3" cy:nodeId="105732">
    <graphics y="-1256.1734448748562" z="0.0" x="756.012690638603"/>
  </node>
  <node id="144137" label="FAM20B" cy:nodeId="105731">
    <graphics y="-833.5196362811062" z="0.0" x="98.20055684954048"/>
  </node>
  <node id="144124" label="ALG12" cy:nodeId="105734">
    <graphics y="2188.409894816306" z="0.0" x="398.29846486956"/>
  </node>
  <node id="144165" label="CTNS" cy:nodeId="114952">
    <graphics y="1043.3539599103" z="0.0" x="-998.6693161973345"/>
  </node>
  <node id="144108" label="B4GALT1" cy:nodeId="107274">
    <graphics y="-2209.8103238421413" z="0.0" x="198.2962904921186"/>
  </node>
  <node id="144302" label="ASH2L" cy:nodeId="107273">
    <graphics y="2188.409894816306" z="0.0" x="-799.1024903306353"/>
  </node>
  <node id="144289" label="CBFB" cy:nodeId="105739">
    <graphics y="1170.6848162335423" z="0.0" x="252.72078237444282"/>
  </node>
  <node id="144301" label="FUT10" cy:nodeId="107278">
    <graphics y="2197.707471720603" z="0.0" x="-699.5356644639361"/>
  </node>
  <node id="144293" label="BRD3" cy:nodeId="107277">
    <graphics y="1538.3089159649876" z="0.0" x="-610.3292817124712"/>
  </node>
  <node id="144264" label="DNMT3A" cy:nodeId="107282">
    <graphics y="84.75404535951884" z="0.0" x="-224.52562418073296"/>
  </node>
  <node id="144281" label="ST6GALNAC6" cy:nodeId="105746">
    <graphics y="1563.5572222394017" z="0.0" x="-890.809330845772"/>
  </node>
  <node id="144294" label="MAN2A2" cy:nodeId="105748">
    <graphics y="-1136.9126416522" z="0.0" x="1379.2392683973922"/>
  </node>
  <node id="144142" label="ST3GAL3" cy:nodeId="105747">
    <graphics y="2297.707471720603" z="0.0" x="-998.6693161973345"/>
  </node>
  <node id="144222" label="MGAT3" cy:nodeId="105750">
    <graphics y="-1649.076460011575" z="0.0" x="1362.763423060478"/>
  </node>
  <node id="144243" label="FUT2" cy:nodeId="107287">
    <graphics y="1863.6544893902806" z="0.0" x="-501.7388199815142"/>
  </node>
  <node id="144245" label="B3GAT3" cy:nodeId="105754">
    <graphics y="1813.86323725405" z="0.0" x="-709.9338578233111"/>
  </node>
  <node id="144086" label="GALK1" cy:nodeId="105753">
    <graphics y="1699.513238779929" z="0.0" x="-998.6693161973345"/>
  </node>
  <node id="144083" label="SUZ12" cy:nodeId="118044">
    <graphics y="1503.0992830914524" z="0.0" x="-259.4108857163775"/>
  </node>
  <node id="144286" label="CDK8" cy:nodeId="105756">
    <graphics y="175.7453173321751" z="0.0" x="1442.6130782118453"/>
  </node>
  <node id="144127" label="POU2F1" cy:nodeId="118043">
    <graphics y="-931.3640576678249" z="0.0" x="991.9942580214155"/>
  </node>
  <node id="144283" label="DPM2" cy:nodeId="105758">
    <graphics y="1263.7023409527806" z="0.0" x="-784.5973252305376"/>
  </node>
  <node id="144078" label="TET3" cy:nodeId="118045">
    <graphics y="-715.8743573504421" z="0.0" x="1257.3832045546187"/>
  </node>
  <node id="144128" label="HK1" cy:nodeId="107293">
    <graphics y="2297.707471720603" z="0.0" x="-599.5356644639361"/>
  </node>
  <node id="144284" label="CDK9" cy:nodeId="105757">
    <graphics y="1435.628213755515" z="0.0" x="-859.1715439805376"/>
  </node>
  <node id="144282" label="MAN1B1" cy:nodeId="105760">
    <graphics y="1338.981832377341" z="0.0" x="-863.421376133858"/>
  </node>
  <node id="144226" label="FOSL2" cy:nodeId="107295">
    <graphics y="-2126.0284568148586" z="0.0" x="260.9165984144819"/>
  </node>
  <node id="144224" label="FOXK1" cy:nodeId="107298">
    <graphics y="-1712.2366772967312" z="0.0" x="1254.8882399550093"/>
  </node>
  <node id="144262" label="MOGS" cy:nodeId="105762">
    <graphics y="400.62062250795634" z="0.0" x="-302.9411725053179"/>
  </node>
  <node id="144292" label="POMT1" cy:nodeId="105761">
    <graphics y="1465.7293108624485" z="0.0" x="-715.7696093568194"/>
  </node>
  <node id="144279" label="CEBPA" cy:nodeId="105764">
    <graphics y="-2402.894392140481" z="0.0" x="-584.7234543809283"/>
  </node>
  <node id="144193" label="MFNG" cy:nodeId="105766">
    <graphics y="-2114.89825833616" z="0.0" x="-298.9290207871783"/>
  </node>
  <node id="144191" label="NAGK" cy:nodeId="105765">
    <graphics y="-2296.490583546731" z="0.0" x="-562.6949509629595"/>
  </node>
  <node id="144107" label="A4GALT" cy:nodeId="105768">
    <graphics y="-2543.740003712747" z="0.0" x="240.12729558855415"/>
  </node>
  <node id="144202" label="HDAC3" cy:nodeId="107304">
    <graphics y="2297.707471720603" z="0.0" x="-200.40201273053765"/>
  </node>
  <node id="144168" label="GALNT2" cy:nodeId="107306">
    <graphics y="-541.6197186785671" z="0.0" x="1704.478465174736"/>
  </node>
  <node id="144201" label="GNPDA1" cy:nodeId="107305">
    <graphics y="2307.0050486248997" z="0.0" x="-100.83518686383843"/>
  </node>
  <node id="144247" label="NDST2" cy:nodeId="105772">
    <graphics y="-1160.9095288592312" z="0.0" x="417.7545119276655"/>
  </node>
  <node id="144138" label="OGT" cy:nodeId="105771">
    <graphics y="-984.0740186053249" z="0.0" x="431.481684779228"/>
  </node>
  <node id="144276" label="CHD8" cy:nodeId="105774">
    <graphics y="875.4641894024876" z="0.0" x="-829.6998337754595"/>
  </node>
  <node id="144186" label="LAMP3" cy:nodeId="105776">
    <graphics y="-1550.705366261575" z="0.0" x="-863.813725377022"/>
  </node>
  <node id="144182" label="JARID2" cy:nodeId="107311">
    <graphics y="-666.8493176775905" z="0.0" x="-386.3329590806353"/>
  </node>
  <node id="144274" label="CIITA" cy:nodeId="105775">
    <graphics y="-1792.8546582537624" z="0.0" x="-488.2475022324908"/>
  </node>
  <node id="144272" label="GAL3ST4" cy:nodeId="105778">
    <graphics y="-1762.3963452654812" z="0.0" x="-384.2116135606158"/>
  </node>
  <node id="144176" label="KDM2B" cy:nodeId="107313">
    <graphics y="-138.08293736753194" z="0.0" x="-156.43671121686577"/>
  </node>
  <node id="144271" label="CPSF3L" cy:nodeId="105780">
    <graphics y="750.1115893048313" z="0.0" x="-35.11209573835015"/>
  </node>
  <node id="144166" label="KDM6B" cy:nodeId="107315">
    <graphics y="941.5003222149876" z="0.0" x="-917.6183518418658"/>
  </node>
  <node id="144234" label="DSE" cy:nodeId="105779">
    <graphics y="-2448.8622876482937" z="0.0" x="-220.12881937116265"/>
  </node>
  <node id="144270" label="B3GALT6" cy:nodeId="105781">
    <graphics y="678.7575853985813" z="0.0" x="-126.76894083112359"/>
  </node>
  <node id="144167" label="B4GALNT4" cy:nodeId="105784">
    <graphics y="-536.5657864886257" z="0.0" x="1963.70235738665"/>
  </node>
  <node id="144268" label="CREB3" cy:nodeId="105786">
    <graphics y="2088.409894816306" z="0.0" x="-100.83518686383843"/>
  </node>
  <node id="144146" label="NCOR2" cy:nodeId="107326">
    <graphics y="-1877.3439465838405" z="0.0" x="1230.6793166151656"/>
  </node>
  <node id="144072" label="B4GALT3" cy:nodeId="105789">
    <graphics y="2197.707471720603" z="0.0" x="-499.96883859723687"/>
  </node>
  <node id="144130" label="POFUT1" cy:nodeId="105792">
    <graphics y="2297.707471720603" z="0.0" x="-399.96883859723687"/>
  </node>
  <node id="144149" label="PAPSS2" cy:nodeId="107328">
    <graphics y="-1911.9152509051296" z="0.0" x="7.865321253837351"/>
  </node>
  <node id="144212" label="COG7" cy:nodeId="105791">
    <graphics y="1766.279481760886" z="0.0" x="-234.4366959580767"/>
  </node>
  <node id="144266" label="CTNNB1" cy:nodeId="105794">
    <graphics y="-1315.7345410662624" z="0.0" x="219.43245992571235"/>
  </node>
  <node id="144144" label="NFYA" cy:nodeId="107329">
    <graphics y="-410.75372136411397" z="0.0" x="-156.28416910260796"/>
  </node>
  <node id="144087" label="SLC35B1" cy:nodeId="105798">
    <graphics y="1663.5572222394017" z="0.0" x="-810.314198399483"/>
  </node>
  <node id="144089" label="DPM1" cy:nodeId="105799">
    <graphics y="2197.707471720603" z="0.0" x="298.29846486956"/>
  </node>
  <node id="144258" label="E2F6" cy:nodeId="105801">
    <graphics y="-649.1623059588405" z="0.0" x="-671.4687851914751"/>
  </node>
  <node id="144101" label="MPI" cy:nodeId="107340">
    <graphics y="-1285.0611401873562" z="0.0" x="1175.7662306776656"/>
  </node>
  <node id="144103" label="SETDB1" cy:nodeId="107339">
    <graphics y="-574.9598218279812" z="0.0" x="-255.72905054181695"/>
  </node>
  <node id="144256" label="E2F7" cy:nodeId="105803">
    <graphics y="89.01539789858134" z="0.0" x="1573.517319773735"/>
  </node>
  <node id="144261" label="ST3GAL2" cy:nodeId="105806">
    <graphics y="153.7492235821751" z="0.0" x="-147.13678445905327"/>
  </node>
  <node id="144159" label="CSGALNACT1" cy:nodeId="105805">
    <graphics y="-2484.6842786150905" z="0.0" x="-84.53970804303765"/>
  </node>
  <node id="144097" label="SMARCC1" cy:nodeId="107344">
    <graphics y="-231.60449338731496" z="0.0" x="-276.62091341107964"/>
  </node>
  <node id="144100" label="SMARCA4" cy:nodeId="107343">
    <graphics y="721.6698168438938" z="0.0" x="-665.9116562852251"/>
  </node>
  <node id="144096" label="SP2" cy:nodeId="107346">
    <graphics y="2197.707471720603" z="0.0" x="-100.83518686383843"/>
  </node>
  <node id="144063" label="LAMP2" cy:nodeId="107350">
    <graphics y="2197.707471720603" z="0.0" x="697.4321166029584"/>
  </node>
  <node id="144161" label="TPST2" cy:nodeId="106840">
    <graphics y="-2086.4761411028835" z="0.0" x="-644.1629685410845"/>
  </node>
  <node id="144255" label="EGR2" cy:nodeId="105816">
    <graphics y="-2360.765211232278" z="0.0" x="527.7080336561811"/>
  </node>
  <node id="144104" label="ST6GALNAC3" cy:nodeId="105815">
    <graphics y="-312.79282964048116" z="0.0" x="1491.904765223564"/>
  </node>
  <node id="144244" label="ST6GALNAC4" cy:nodeId="106839">
    <graphics y="1663.5572222394017" z="0.0" x="-590.2257584580767"/>
  </node>
  <node id="144077" label="TFAP2C" cy:nodeId="107354">
    <graphics y="1931.1689318341282" z="0.0" x="-409.2191361436236"/>
  </node>
  <node id="144069" label="VDR" cy:nodeId="107356">
    <graphics y="-2057.3850766497585" z="0.0" x="135.45089254289985"/>
  </node>
  <node id="144290" label="SLC35E1" cy:nodeId="106844">
    <graphics y="712.9677904767063" z="0.0" x="-541.519276524483"/>
  </node>
  <node id="144291" label="BRD4" cy:nodeId="106843">
    <graphics y="809.4318407696751" z="0.0" x="-462.02989664167046"/>
  </node>
  <node id="144252" label="ELF1" cy:nodeId="105822">
    <graphics y="1249.1380175274876" z="0.0" x="498.9361525526655"/>
  </node>
  <node id="144250" label="COG6" cy:nodeId="105824">
    <graphics y="1369.2851732892063" z="0.0" x="544.2526198378217"/>
  </node>
  <node id="144251" label="COG3" cy:nodeId="105823">
    <graphics y="1143.3539599103" z="0.0" x="461.90111074358344"/>
  </node>
  <node id="144237" label="XYLT1" cy:nodeId="106854">
    <graphics y="-2304.658277638528" z="0.0" x="11.841731165946726"/>
  </node>
  <node id="144248" label="ERCC6" cy:nodeId="105830">
    <graphics y="-1250.2896558123562" z="0.0" x="513.8136549940717"/>
  </node>
  <node id="144249" label="EP400" cy:nodeId="105829">
    <graphics y="767.5486620587376" z="0.0" x="-916.1339158067095"/>
  </node>
  <node id="144218" label="ST8SIA4" cy:nodeId="105834">
    <graphics y="-2181.8664380389187" z="0.0" x="-360.9793137559283"/>
  </node>
  <node id="144134" label="ST3GAL5" cy:nodeId="106857">
    <graphics y="-1779.7661267596218" z="0.0" x="877.5148268690717"/>
  </node>
  <node id="144254" label="CHSY3" cy:nodeId="105833">
    <graphics y="-2367.5172711688015" z="0.0" x="382.20035848528266"/>
  </node>
  <node id="144288" label="GALNT7" cy:nodeId="106859">
    <graphics y="1143.3539599103" z="0.0" x="361.90111074358344"/>
  </node>
  <node id="144230" label="CHST15" cy:nodeId="106861">
    <graphics y="-2243.6184293108913" z="0.0" x="288.5952371111524"/>
  </node>
  <node id="144070" label="GPI" cy:nodeId="106864">
    <graphics y="2197.707471720603" z="0.0" x="-300.40201273053765"/>
  </node>
  <node id="144231" label="ST8SIA1" cy:nodeId="105840">
    <graphics y="-2098.757757313821" z="0.0" x="-150.65665140241265"/>
  </node>
  <node id="144242" label="ETV1" cy:nodeId="105842">
    <graphics y="-2243.8646375018093" z="0.0" x="88.63386068254829"/>
  </node>
  <node id="144122" label="HS3ST3B1" cy:nodeId="105841">
    <graphics y="-1808.0290662127468" z="0.0" x="-201.56696024030327"/>
  </node>
  <node id="144257" label="EXTL2" cy:nodeId="105844">
    <graphics y="-722.6604138689968" z="0.0" x="-577.1651658067095"/>
  </node>
  <node id="144241" label="ARSB" cy:nodeId="105843">
    <graphics y="-2387.7106915789577" z="0.0" x="7.280970667899851"/>
  </node>
  <node id="144285" label="SLC35B4" cy:nodeId="105845">
    <graphics y="40.53132807436259" z="0.0" x="1458.1831160536422"/>
  </node>
  <node id="144184" label="IRF2" cy:nodeId="106871">
    <graphics y="-1531.8794995623562" z="0.0" x="-998.6693161973345"/>
  </node>
  <node id="144156" label="PIGH" cy:nodeId="105852">
    <graphics y="2079.112317912009" z="0.0" x="-998.6693161973345"/>
  </node>
  <node id="144160" label="MAF" cy:nodeId="106876">
    <graphics y="-2231.619604237649" z="0.0" x="-91.25446024030327"/>
  </node>
  <node id="144147" label="RPN2" cy:nodeId="105854">
    <graphics y="2079.112317912009" z="0.0" x="-799.1024903306353"/>
  </node>
  <node id="144150" label="MEIS3" cy:nodeId="106878">
    <graphics y="-1862.328413136575" z="0.0" x="-69.34598245710015"/>
  </node>
  <node id="144126" label="POU2F2" cy:nodeId="106880">
    <graphics y="-2654.191511281106" z="0.0" x="-234.48114481061577"/>
  </node>
  <node id="144221" label="FOXO1" cy:nodeId="105856">
    <graphics y="1398.049516550925" z="0.0" x="657.5582839003217"/>
  </node>
  <node id="144174" label="GFPT1" cy:nodeId="106882">
    <graphics y="-887.7352124529812" z="0.0" x="-810.1671189317095"/>
  </node>
  <node id="144219" label="FOXP3" cy:nodeId="105858">
    <graphics y="-1967.555723317239" z="0.0" x="-333.4598435410845"/>
  </node>
  <node id="144125" label="PPARA" cy:nodeId="106881">
    <graphics y="2197.707471720603" z="0.0" x="497.8652907362592"/>
  </node>
  <node id="144278" label="NPL" cy:nodeId="105860">
    <graphics y="-2250.058881886575" z="0.0" x="-440.955082798897"/>
  </node>
  <node id="144240" label="SULF1" cy:nodeId="106883">
    <graphics y="-2047.0229626971218" z="0.0" x="-30.52237405866265"/>
  </node>
  <node id="144296" label="HK3" cy:nodeId="105859">
    <graphics y="-2031.1227551775905" z="0.0" x="-391.7299241074908"/>
  </node>
  <node id="144215" label="GATAD1" cy:nodeId="105863">
    <graphics y="-1270.2157422381374" z="0.0" x="-338.4680031785357"/>
  </node>
  <node id="144076" label="THAP11" cy:nodeId="106890">
    <graphics y="1305.5795038861302" z="0.0" x="45.537348841727976"/>
  </node>
  <node id="144213" label="GLYR1" cy:nodeId="105866">
    <graphics y="1876.392000071433" z="0.0" x="-273.12532510846734"/>
  </node>
  <node id="144210" label="GTF2B" cy:nodeId="105868">
    <graphics y="1770.1182116192845" z="0.0" x="11.811991786063913"/>
  </node>
  <node id="144287" label="COG4" cy:nodeId="106892">
    <graphics y="1197.9098757428196" z="0.0" x="123.51883993059516"/>
  </node>
  <node id="144211" label="ALG1" cy:nodeId="105867">
    <graphics y="1979.112317912009" z="0.0" x="-309.2191361436236"/>
  </node>
  <node id="144259" label="COG8" cy:nodeId="106891">
    <graphics y="1245.8033388775852" z="0.0" x="-49.48528757184624"/>
  </node>
  <node id="144198" label="STT3A" cy:nodeId="106893">
    <graphics y="1864.6841143292454" z="0.0" x="433.87208089739204"/>
  </node>
  <node id="144208" label="CTBS" cy:nodeId="105869">
    <graphics y="1663.5572222394017" z="0.0" x="57.09504232317329"/>
  </node>
  <node id="144204" label="H2AFX" cy:nodeId="105872">
    <graphics y="1143.3539599103" z="0.0" x="-765.4809655198443"/>
  </node>
  <node id="144206" label="GTF2I" cy:nodeId="105871">
    <graphics y="-1020.7745190936062" z="0.0" x="-232.7021111497271"/>
  </node>
  <node id="144267" label="PIGO" cy:nodeId="105874">
    <graphics y="2079.112317912009" z="0.0" x="-200.40201273053765"/>
  </node>
  <node id="144203" label="HCFC1" cy:nodeId="105873">
    <graphics y="-1162.1307813006374" z="0.0" x="1511.8111220350875"/>
  </node>
  <node id="144199" label="DPAGT1" cy:nodeId="105878">
    <graphics y="1728.8111284894017" z="0.0" x="255.4557906141889"/>
  </node>
  <node id="144200" label="HINFP" cy:nodeId="105877">
    <graphics y="1797.0031450909642" z="0.0" x="344.99906453997016"/>
  </node>
  <node id="144196" label="TSTA3" cy:nodeId="105880">
    <graphics y="1767.0088213604954" z="0.0" x="533.872080897392"/>
  </node>
  <node id="144197" label="HSF1" cy:nodeId="105879">
    <graphics y="1715.3245562237767" z="0.0" x="627.6850768080366"/>
  </node>
  <node id="144194" label="IKZF1" cy:nodeId="105882">
    <graphics y="-2275.2086469012233" z="0.0" x="-325.6912888535845"/>
  </node>
  <node id="144195" label="GPAA1" cy:nodeId="105881">
    <graphics y="1663.5572222394017" z="0.0" x="721.6491271010053"/>
  </node>
  <node id="144277" label="LIPA" cy:nodeId="105884">
    <graphics y="-2383.074827321145" z="0.0" x="-462.5720871934283"/>
  </node>
  <node id="144192" label="GM2A" cy:nodeId="105883">
    <graphics y="-2285.282819874856" z="0.0" x="-217.78064432233452"/>
  </node>
  <node id="144188" label="INO80" cy:nodeId="105885">
    <graphics y="-1040.405561574075" z="0.0" x="922.2949782362592"/>
  </node>
  <node id="144187" label="IRF1" cy:nodeId="105887">
    <graphics y="-1710.4106885272" z="0.0" x="-672.8441208848345"/>
  </node>
  <node id="144183" label="IRF8" cy:nodeId="105890">
    <graphics y="-2333.7663556414577" z="0.0" x="-298.9694260606158"/>
  </node>
  <node id="144180" label="JUNB" cy:nodeId="105898">
    <graphics y="2088.409894816306" z="0.0" x="-300.40201273053765"/>
  </node>
  <node id="144189" label="GBGT1" cy:nodeId="105897">
    <graphics y="-2515.0578137713405" z="0.0" x="-483.2042893418658"/>
  </node>
  <node id="144269" label="GNB1" cy:nodeId="105902">
    <graphics y="639.8192919415501" z="0.0" x="4.310175990165476"/>
  </node>
  <node id="144178" label="KDM1A" cy:nodeId="105901">
    <graphics y="574.3897265118626" z="0.0" x="101.2055922499311"/>
  </node>
  <node id="144171" label="KDM5A" cy:nodeId="105904">
    <graphics y="1299.765565745261" z="0.0" x="-353.2377900132525"/>
  </node>
  <node id="144175" label="KDM3A" cy:nodeId="105903">
    <graphics y="-821.5413647967312" z="0.0" x="-704.6191758164751"/>
  </node>
  <node id="144170" label="GNS" cy:nodeId="105905">
    <graphics y="1391.2632769269017" z="0.0" x="-261.32897653669"/>
  </node>
  <node id="144263" label="B3GALNT2" cy:nodeId="105908">
    <graphics y="-260.79623044309346" z="0.0" x="-149.41632547467827"/>
  </node>
  <node id="144169" label="KDM5B" cy:nodeId="105907">
    <graphics y="-542.7549039202663" z="0.0" x="1845.4302016249312"/>
  </node>
  <node id="144163" label="HS3ST1" cy:nodeId="105910">
    <graphics y="-2171.094904072854" z="0.0" x="-758.2806443223345"/>
  </node>
  <node id="144164" label="LMO2" cy:nodeId="105909">
    <graphics y="-2129.2416116076442" z="0.0" x="-553.8395432481158"/>
  </node>
  <node id="144217" label="RENBP" cy:nodeId="105912">
    <graphics y="-1910.8397656756374" z="0.0" x="-411.1127366074908"/>
  </node>
  <node id="144162" label="LYL1" cy:nodeId="105911">
    <graphics y="-2102.011217244241" z="0.0" x="-411.849614048897"/>
  </node>
  <node id="144158" label="MAFB" cy:nodeId="105914">
    <graphics y="-2501.523542531106" z="0.0" x="-353.2424973496783"/>
  </node>
  <node id="144157" label="MAX" cy:nodeId="105915">
    <graphics y="2088.409894816306" z="0.0" x="-899.1024903306353"/>
  </node>
  <node id="144155" label="MECOM" cy:nodeId="105919">
    <graphics y="-211.17627538022725" z="0.0" x="-27.413273716865774"/>
  </node>
  <node id="144153" label="IDS" cy:nodeId="105922">
    <graphics y="2307.0050486248997" z="0.0" x="-699.5356644639361"/>
  </node>
  <node id="144154" label="MECP2" cy:nodeId="105921">
    <graphics y="2297.707471720603" z="0.0" x="-799.1024903306353"/>
  </node>
  <node id="144223" label="NDST1" cy:nodeId="105923">
    <graphics y="-1816.076978810403" z="0.0" x="1121.0950880995406"/>
  </node>
  <node id="144152" label="MEF2A" cy:nodeId="105925">
    <graphics y="-959.2354565936062" z="0.0" x="1397.0643721571578"/>
  </node>
  <node id="144148" label="MYBL2" cy:nodeId="105935">
    <graphics y="2088.409894816306" z="0.0" x="-699.5356644639361"/>
  </node>
  <node id="144260" label="E2F4" cy:nodeId="107987">
    <graphics y="1155.0961397809056" z="0.0" x="13.348704432548288"/>
  </node>
  <node id="144145" label="NFATC1" cy:nodeId="105944">
    <graphics y="-1952.8218976336452" z="0.0" x="-686.6709641465533"/>
  </node>
  <node id="144209" label="ALG14" cy:nodeId="107992">
    <graphics y="1795.8191698712376" z="0.0" x="-98.34819498151421"/>
  </node>
  <node id="144143" label="NFYC" cy:nodeId="105946">
    <graphics y="2307.0050486248997" z="0.0" x="-899.1024903306353"/>
  </node>
  <node id="144140" label="NPAT" cy:nodeId="105948">
    <graphics y="1663.5572222394017" z="0.0" x="169.7696333876264"/>
  </node>
  <node id="144139" label="NR2C2" cy:nodeId="105949">
    <graphics y="-1039.573042042825" z="0.0" x="288.7162428846967"/>
  </node>
  <node id="144173" label="KDM4C" cy:nodeId="107997">
    <graphics y="2088.409894816306" z="0.0" x="697.4321166029584"/>
  </node>
  <node id="144136" label="NR2F1" cy:nodeId="105951">
    <graphics y="-1906.2033521014187" z="0.0" x="868.924800013603"/>
  </node>
  <node id="144181" label="PIGM" cy:nodeId="105954">
    <graphics y="-585.2844373064968" z="0.0" x="-141.14044656842827"/>
  </node>
  <node id="144132" label="PBX1" cy:nodeId="105953">
    <graphics y="-753.0627271014187" z="0.0" x="-15.044743443428274"/>
  </node>
  <node id="144131" label="PHF20" cy:nodeId="105956">
    <graphics y="2307.0050486248997" z="0.0" x="-300.40201273053765"/>
  </node>
  <node id="144084" label="DAD1" cy:nodeId="108008">
    <graphics y="1855.3128832501438" z="0.0" x="-809.9338578233111"/>
  </node>
  <node id="144129" label="POLR3A" cy:nodeId="105960">
    <graphics y="2307.0050486248997" z="0.0" x="-499.96883859723687"/>
  </node>
  <node id="144123" label="PRDM1" cy:nodeId="105962">
    <graphics y="-2027.9155408221218" z="0.0" x="-210.95084085553765"/>
  </node>
  <node id="144120" label="RB1" cy:nodeId="105965">
    <graphics y="1466.86616694155" z="0.0" x="479.75694570452094"/>
  </node>
</graph>
