# Supplementary material for: A systems-based framework to computationally describe putative transcription factors and signaling pathways regulating glycan biosynthesis
Source: publisher site journal article supplement (doi:10.3762/bjoc.17.119), 2021-07-22
Supplement: Additional file 2 [file 1860-5397-17-119-S2.cys › CytoscapeSession-2021_03_21-12_01/views/118318-141405-PAAD.xgmml]

<?xml version="1.0" encoding="UTF-8" standalone="yes"?>
<graph id="141405" label="PAAD" cy:view="1" cy:networkId="118318" cy:visualStyle="default" cy:rendererId="org.cytoscape.ding" cy:documentVersion="3.0" xmlns:dc="http://purl.org/dc/elements/1.1/" xmlns:xlink="http://www.w3.org/1999/xlink" xmlns:rdf="http://www.w3.org/1999/02/22-rdf-syntax-ns#" xmlns:cy="http://www.cytoscape.org" xmlns="http://www.cs.rpi.edu/XGMML">
  <graphics>
    <att name="NETWORK_NODE_SELECTION" value="true" type="string" cy:type="String"/>
    <att name="NETWORK_CENTER_X_LOCATION" value="116.327392578125" type="string" cy:type="String"/>
    <att name="NETWORK_HEIGHT" value="510.0" type="string" cy:type="String"/>
    <att name="NETWORK_TITLE" value="PAAD" type="string" cy:type="String"/>
    <att name="NETWORK_EDGE_SELECTION" value="true" type="string" cy:type="String"/>
    <att name="NETWORK_CENTER_Y_LOCATION" value="-23.39129638671875" type="string" cy:type="String"/>
    <att name="NETWORK_WIDTH" value="1312.0" type="string" cy:type="String"/>
    <att name="NETWORK_DEPTH" value="0.0" type="string" cy:type="String"/>
    <att name="NETWORK_SCALE_FACTOR" value="0.1635259242182991" type="string" cy:type="String"/>
    <att name="NETWORK_ANNOTATION_SELECTION" value="false" type="string" cy:type="String"/>
    <att name="NETWORK_CENTER_Z_LOCATION" value="0.0" type="string" cy:type="String"/>
  </graphics>
  <node id="141842" label="ATF4" cy:nodeId="108550">
    <graphics y="706.7255349719501" z="0.0" x="1385.4676390809796"/>
  </node>
  <node id="141603" label="GCNT1" cy:nodeId="108552">
    <graphics y="-799.9167379772687" z="0.0" x="517.9280577821514"/>
  </node>
  <node id="141864" label="UGDH" cy:nodeId="108551">
    <graphics y="-447.5140585339093" z="0.0" x="-466.48621834089545"/>
  </node>
  <node id="141722" label="PMM2" cy:nodeId="108556">
    <graphics y="-259.8799795544171" z="0.0" x="887.7669554872296"/>
  </node>
  <node id="141485" label="PIGC" cy:nodeId="108558">
    <graphics y="-729.4241232311749" z="0.0" x="1121.3599730653546"/>
  </node>
  <node id="141827" label="GALE" cy:nodeId="108559">
    <graphics y="-47.55044693112609" z="0.0" x="984.7442504091046"/>
  </node>
  <node id="141601" label="GALNT6" cy:nodeId="108561">
    <graphics y="-693.9999288952374" z="0.0" x="201.7034751100323"/>
  </node>
  <node id="141757" label="CEBPD" cy:nodeId="108563">
    <graphics y="579.4288430774188" z="0.0" x="1180.0630980653546"/>
  </node>
  <node id="141724" label="DR1" cy:nodeId="108571">
    <graphics y="-662.6924337780499" z="0.0" x="-850.846936114333"/>
  </node>
  <node id="141721" label="E2F8" cy:nodeId="108575">
    <graphics y="-339.77489227414367" z="0.0" x="1355.328356854417"/>
  </node>
  <node id="141807" label="PIGL" cy:nodeId="108578">
    <graphics y="248.44648223757508" z="0.0" x="509.5908385438702"/>
  </node>
  <node id="141859" label="UGP2" cy:nodeId="108584">
    <graphics y="-352.3811544811749" z="0.0" x="-570.2737549619892"/>
  </node>
  <node id="141761" label="CHPF" cy:nodeId="108583">
    <graphics y="658.8338723742938" z="0.0" x="863.5371581239483"/>
  </node>
  <node id="141812" label="SLC35A4" cy:nodeId="108586">
    <graphics y="182.03313690066102" z="0.0" x="376.7089415712139"/>
  </node>
  <node id="141754" label="SLC35C1" cy:nodeId="108588">
    <graphics y="-492.6464132702374" z="0.0" x="582.1039305848858"/>
  </node>
  <node id="141624" label="HDAC6" cy:nodeId="108593">
    <graphics y="260.81409698366883" z="0.0" x="361.9360839051983"/>
  </node>
  <node id="141539" label="MAFF" cy:nodeId="108598">
    <graphics y="-461.8371786510968" z="0.0" x="903.6282225770733"/>
  </node>
  <node id="141516" label="NCOR1" cy:nodeId="108603">
    <graphics y="-913.8844503796124" z="0.0" x="-318.91053474714545"/>
  </node>
  <node id="141498" label="PAX6" cy:nodeId="108607">
    <graphics y="647.4702859485126" z="0.0" x="-1070.969738848708"/>
  </node>
  <node id="141477" label="RBCK1" cy:nodeId="108610">
    <graphics y="96.83573394655946" z="0.0" x="1275.5960570497296"/>
  </node>
  <node id="141767" label="CHST5" cy:nodeId="108612">
    <graphics y="-1534.0893453991437" z="0.0" x="731.4973632020733"/>
  </node>
  <node id="141470" label="RING1" cy:nodeId="108613">
    <graphics y="465.73340850710633" z="0.0" x="714.9010497255108"/>
  </node>
  <node id="141462" label="SFMBT1" cy:nodeId="108615">
    <graphics y="-745.1068624889874" z="0.0" x="-602.7293824033954"/>
  </node>
  <node id="141457" label="SNAPC1" cy:nodeId="108618">
    <graphics y="-722.3640036022687" z="0.0" x="-254.6620606260517"/>
  </node>
  <node id="141456" label="SOX4" cy:nodeId="108620">
    <graphics y="1406.726969298122" z="0.0" x="-1392.731243975661"/>
  </node>
  <node id="141434" label="SUPT5H" cy:nodeId="108622">
    <graphics y="-140.93059295773742" z="0.0" x="1499.6959105653546"/>
  </node>
  <node id="141453" label="SOX9" cy:nodeId="108621">
    <graphics y="-590.4238180553937" z="0.0" x="432.68036185929986"/>
  </node>
  <node id="141431" label="TAF7" cy:nodeId="108623">
    <graphics y="-321.6098379528546" z="0.0" x="829.5010253114483"/>
  </node>
  <node id="141417" label="TFE3" cy:nodeId="108625">
    <graphics y="172.10816436648133" z="0.0" x="-1418.7738159971454"/>
  </node>
  <node id="141608" label="HJURP" cy:nodeId="117857">
    <graphics y="-469.02806610226867" z="0.0" x="1009.3951293153546"/>
  </node>
  <node id="141503" label="NR2F6" cy:nodeId="117859">
    <graphics y="45.172625120875864" z="0.0" x="1465.8343382997296"/>
  </node>
  <node id="141822" label="C1GALT1" cy:nodeId="109670">
    <graphics y="-440.99901336789367" z="0.0" x="311.0492964906475"/>
  </node>
  <node id="141454" label="UXS1" cy:nodeId="109669">
    <graphics y="1487.3067117297626" z="0.0" x="-1463.8065308408954"/>
  </node>
  <node id="141709" label="SMPD1" cy:nodeId="109673">
    <graphics y="558.8278909289813" z="0.0" x="-561.810315020583"/>
  </node>
  <node id="141478" label="GLB1" cy:nodeId="109675">
    <graphics y="-776.9125875866437" z="0.0" x="-385.6481446104267"/>
  </node>
  <node id="141545" label="NAGLU" cy:nodeId="109680">
    <graphics y="677.5872293078876" z="0.0" x="527.5572081727764"/>
  </node>
  <node id="141614" label="HEY1" cy:nodeId="109679">
    <graphics y="284.83854156374696" z="0.0" x="-561.0362671690204"/>
  </node>
  <node id="141615" label="XYLT2" cy:nodeId="109684">
    <graphics y="496.49122100710633" z="0.0" x="1151.4255858583233"/>
  </node>
  <node id="141520" label="MXD1" cy:nodeId="109683">
    <graphics y="96.61783843874696" z="0.0" x="1580.657458416917"/>
  </node>
  <node id="141507" label="NR1H2" cy:nodeId="109685">
    <graphics y="478.2031961047626" z="0.0" x="874.897204510667"/>
  </node>
  <node id="141558" label="UGT1A9" cy:nodeId="109687">
    <graphics y="-778.9704489147687" z="0.0" x="753.584460370042"/>
  </node>
  <node id="141423" label="TEAD2" cy:nodeId="109690">
    <graphics y="668.6135964953876" z="0.0" x="-578.5918701963642"/>
  </node>
  <node id="141625" label="PIGG" cy:nodeId="109689">
    <graphics y="-452.8394979870343" z="0.0" x="793.357897870042"/>
  </node>
  <node id="141416" label="TGIF1" cy:nodeId="109691">
    <graphics y="-39.19851822018859" z="0.0" x="1118.2109862489483"/>
  </node>
  <node id="141808" label="BTAF1" cy:nodeId="110789">
    <graphics y="454.00074249148133" z="0.0" x="374.004366986253"/>
  </node>
  <node id="141756" label="CEBPG" cy:nodeId="110791">
    <graphics y="-562.6748251354718" z="0.0" x="682.8484679384014"/>
  </node>
  <node id="141681" label="ESRRA" cy:nodeId="110794">
    <graphics y="117.23015838503602" z="0.0" x="968.607897870042"/>
  </node>
  <node id="141725" label="DDIT3" cy:nodeId="110793">
    <graphics y="-574.4477133190655" z="0.0" x="1463.5799437684796"/>
  </node>
  <node id="141815" label="SGSH" cy:nodeId="110804">
    <graphics y="604.3332009875751" z="0.0" x="53.875918499924865"/>
  </node>
  <node id="141598" label="GALK2" cy:nodeId="110806">
    <graphics y="-554.879720155003" z="0.0" x="765.7869750184796"/>
  </node>
  <node id="141889" label="AFF4" cy:nodeId="105686">
    <graphics y="-290.28091949582335" z="0.0" x="-397.7575196104267"/>
  </node>
  <node id="141747" label="FUT7" cy:nodeId="105685">
    <graphics y="700.9636941516376" z="0.0" x="-434.6204346494892"/>
  </node>
  <node id="141489" label="PIAS4" cy:nodeId="110808">
    <graphics y="-1226.2133688366437" z="0.0" x="329.51031791398736"/>
  </node>
  <node id="141887" label="STT3B" cy:nodeId="105688">
    <graphics y="-277.4554647839093" z="0.0" x="-352.6717041807392"/>
  </node>
  <node id="141506" label="NR1H3" cy:nodeId="110807">
    <graphics y="241.29020171999696" z="0.0" x="1558.7942992372296"/>
  </node>
  <node id="141888" label="MAN1A2" cy:nodeId="105687">
    <graphics y="-113.17575210690734" z="0.0" x="-374.4563721494892"/>
  </node>
  <node id="141885" label="FUT11" cy:nodeId="105690">
    <graphics y="-296.1153311169171" z="0.0" x="-498.77467048933295"/>
  </node>
  <node id="141886" label="NEU3" cy:nodeId="105689">
    <graphics y="-164.49952453732726" z="0.0" x="-378.97413337995795"/>
  </node>
  <node id="141883" label="COG5" cy:nodeId="105692">
    <graphics y="-344.9507040417218" z="0.0" x="-253.47111213972357"/>
  </node>
  <node id="141561" label="ACER2" cy:nodeId="105691">
    <graphics y="-95.62832397580382" z="0.0" x="171.75378333757135"/>
  </node>
  <node id="141884" label="MAN2A1" cy:nodeId="105694">
    <graphics y="-234.6020712292218" z="0.0" x="-463.3346680479267"/>
  </node>
  <node id="141872" label="SLC35F5" cy:nodeId="105696">
    <graphics y="-360.9166464245343" z="0.0" x="-213.61314094831732"/>
  </node>
  <node id="141879" label="SLC35A3" cy:nodeId="105695">
    <graphics y="-362.2913107311749" z="0.0" x="160.52630149553033"/>
  </node>
  <node id="141881" label="GALNT10" cy:nodeId="105697">
    <graphics y="-433.1245321667218" z="0.0" x="-541.6215332823017"/>
  </node>
  <node id="141855" label="RTF1" cy:nodeId="105700">
    <graphics y="-460.5737509167218" z="0.0" x="-371.4165772276142"/>
  </node>
  <node id="141856" label="ARID2" cy:nodeId="105699">
    <graphics y="-874.0624899303937" z="0.0" x="-638.863293536208"/>
  </node>
  <node id="141875" label="SLC35A5" cy:nodeId="105702">
    <graphics y="-205.65276092648742" z="0.0" x="-385.0252198057392"/>
  </node>
  <node id="141854" label="ATF1" cy:nodeId="105701">
    <graphics y="-151.9664511120343" z="0.0" x="-427.88026130964545"/>
  </node>
  <node id="141846" label="ATF2" cy:nodeId="105704">
    <graphics y="-395.3826193249249" z="0.0" x="-343.8657959776142"/>
  </node>
  <node id="141735" label="GALNT4" cy:nodeId="105703">
    <graphics y="-519.8080953991437" z="0.0" x="457.0664549989483"/>
  </node>
  <node id="141880" label="UGGT1" cy:nodeId="105705">
    <graphics y="-375.57787078976867" z="0.0" x="-293.36488045027045"/>
  </node>
  <node id="141580" label="HAS1" cy:nodeId="105708">
    <graphics y="853.4876199328876" z="0.0" x="-810.4742554502704"/>
  </node>
  <node id="141564" label="B3GNT5" cy:nodeId="105707">
    <graphics y="-462.5500692760968" z="0.0" x="161.96324454972955"/>
  </node>
  <node id="141652" label="HAS2" cy:nodeId="105709">
    <graphics y="241.25055938601258" z="0.0" x="-1209.988293536208"/>
  </node>
  <node id="141840" label="ATRX" cy:nodeId="105712">
    <graphics y="-519.3168539440655" z="0.0" x="-574.3911866026142"/>
  </node>
  <node id="141877" label="ALG10" cy:nodeId="105711">
    <graphics y="-406.5457968151593" z="0.0" x="-260.5822266416767"/>
  </node>
  <node id="141791" label="HS6ST3" cy:nodeId="114930">
    <graphics y="514.3494973742938" z="0.0" x="-880.1388062315204"/>
  </node>
  <node id="141853" label="FKTN" cy:nodeId="105713">
    <graphics y="-303.50938934445617" z="0.0" x="-227.72230232527045"/>
  </node>
  <node id="141860" label="MAN1A1" cy:nodeId="105716">
    <graphics y="-46.0811743176007" z="0.0" x="-549.5392578916767"/>
  </node>
  <node id="141866" label="CSGALNACT2" cy:nodeId="105715">
    <graphics y="-87.4828791058087" z="0.0" x="-571.3241089658954"/>
  </node>
  <node id="141677" label="CHST11" cy:nodeId="105718">
    <graphics y="-143.46226257443664" z="0.0" x="-1079.7140015440204"/>
  </node>
  <node id="141497" label="SLC35F4" cy:nodeId="114933">
    <graphics y="752.7387796008563" z="0.0" x="-1200.4259156065204"/>
  </node>
  <node id="141868" label="CHSY1" cy:nodeId="105717">
    <graphics y="-7.158429566624136" z="0.0" x="-707.311535723708"/>
  </node>
  <node id="141643" label="SULT1B1" cy:nodeId="114936">
    <graphics y="-729.6058859264874" z="0.0" x="323.8463164491436"/>
  </node>
  <node id="141668" label="ST6GAL2" cy:nodeId="105720">
    <graphics y="-276.2441152966046" z="0.0" x="-1064.969494708083"/>
  </node>
  <node id="141703" label="GFPT2" cy:nodeId="105719">
    <graphics y="221.15677886843446" z="0.0" x="-747.4977539854267"/>
  </node>
  <node id="141773" label="DPM3" cy:nodeId="105722">
    <graphics y="559.6712747180438" z="0.0" x="951.028308026292"/>
  </node>
  <node id="141636" label="GLI3" cy:nodeId="114937">
    <graphics y="-99.56260055661437" z="0.0" x="-1459.171399004958"/>
  </node>
  <node id="141839" label="BATF" cy:nodeId="105721">
    <graphics y="-118.39814895749328" z="0.0" x="956.6328612489483"/>
  </node>
  <node id="141830" label="MGAT1" cy:nodeId="105724">
    <graphics y="494.78553253054383" z="0.0" x="-1204.184094317458"/>
  </node>
  <node id="141831" label="BATF3" cy:nodeId="105723">
    <graphics y="452.5559793078876" z="0.0" x="-1126.885510333083"/>
  </node>
  <node id="141821" label="BMI1" cy:nodeId="105726">
    <graphics y="-202.3279013073468" z="0.0" x="-244.03318489362982"/>
  </node>
  <node id="141654" label="AGA" cy:nodeId="114944">
    <graphics y="-1106.8401998913312" z="0.0" x="772.9882079286358"/>
  </node>
  <node id="141549" label="LMTK3" cy:nodeId="114943">
    <graphics y="306.42713409304383" z="0.0" x="1304.4305297059796"/>
  </node>
  <node id="141873" label="ALG10B" cy:nodeId="105727">
    <graphics y="-248.27921051144835" z="0.0" x="-315.9524658994892"/>
  </node>
  <node id="141508" label="NR1D1" cy:nodeId="114946">
    <graphics y="-201.81656402707335" z="0.0" x="1282.1597777528546"/>
  </node>
  <node id="141849" label="PIGN" cy:nodeId="105730">
    <graphics y="-81.31527561307189" z="0.0" x="-411.13819587995795"/>
  </node>
  <node id="141486" label="POLR3GL" cy:nodeId="114948">
    <graphics y="-920.2608541882062" z="0.0" x="1061.301989666917"/>
  </node>
  <node id="141863" label="SLC35E3" cy:nodeId="105732">
    <graphics y="-354.6439413464093" z="0.0" x="-486.2803467588642"/>
  </node>
  <node id="141689" label="GALNT13" cy:nodeId="114947">
    <graphics y="27.700579222438364" z="0.0" x="-1158.801770098708"/>
  </node>
  <node id="141844" label="FAM20B" cy:nodeId="105731">
    <graphics y="-480.50670379758117" z="0.0" x="-288.78565681745795"/>
  </node>
  <node id="141818" label="ALG12" cy:nodeId="105734">
    <graphics y="554.9790139758563" z="0.0" x="567.5380126161358"/>
  </node>
  <node id="141819" label="BRD1" cy:nodeId="105733">
    <graphics y="344.81067901491883" z="0.0" x="267.5695601625225"/>
  </node>
  <node id="141661" label="CTNS" cy:nodeId="114952">
    <graphics y="478.2902322375751" z="0.0" x="-455.35535896589545"/>
  </node>
  <node id="141806" label="C17orf49" cy:nodeId="105736">
    <graphics y="890.1165261828876" z="0.0" x="745.1308776063702"/>
  </node>
  <node id="141546" label="HYAL2" cy:nodeId="105737">
    <graphics y="774.0848489367938" z="0.0" x="440.55780326554986"/>
  </node>
  <node id="141591" label="GALNS" cy:nodeId="105740">
    <graphics y="148.22970062136415" z="0.0" x="-1301.5316284971454"/>
  </node>
  <node id="141800" label="CBFB" cy:nodeId="105739">
    <graphics y="-317.4297842419171" z="0.0" x="13.56174003312799"/>
  </node>
  <node id="141557" label="CMAS" cy:nodeId="105742">
    <graphics y="-917.6623434460187" z="0.0" x="680.5997801942608"/>
  </node>
  <node id="141774" label="RFNG" cy:nodeId="105744">
    <graphics y="390.55958038210633" z="0.0" x="916.3152953309796"/>
  </node>
  <node id="141715" label="ST6GALNAC6" cy:nodeId="105746">
    <graphics y="411.80375152468446" z="0.0" x="-487.3501709776142"/>
  </node>
  <node id="141794" label="CBX7" cy:nodeId="105745">
    <graphics y="596.8683572375751" z="0.0" x="-835.781750567458"/>
  </node>
  <node id="141623" label="MAN2A2" cy:nodeId="105748">
    <graphics y="245.89969879030946" z="0.0" x="-138.19910896589545"/>
  </node>
  <node id="141713" label="ST3GAL3" cy:nodeId="105747">
    <graphics y="492.46692901491883" z="0.0" x="-711.4209717588642"/>
  </node>
  <node id="141447" label="MGAT3" cy:nodeId="105750">
    <graphics y="1335.4468789660907" z="0.0" x="-1122.086842425368"/>
  </node>
  <node id="141762" label="IDUA" cy:nodeId="105749">
    <graphics y="411.78409820437196" z="0.0" x="758.1919432801983"/>
  </node>
  <node id="141805" label="B3GAT3" cy:nodeId="105754">
    <graphics y="503.4934793078876" z="0.0" x="944.602282635667"/>
  </node>
  <node id="141618" label="GALK1" cy:nodeId="105753">
    <graphics y="663.9989114367938" z="0.0" x="753.8972655458233"/>
  </node>
  <node id="141777" label="CDK8" cy:nodeId="105756">
    <graphics y="-395.41328949094054" z="0.0" x="-160.5005616026142"/>
  </node>
  <node id="141841" label="DPM2" cy:nodeId="105758">
    <graphics y="512.0385232532001" z="0.0" x="1037.1366454286358"/>
  </node>
  <node id="141776" label="CDK9" cy:nodeId="105757">
    <graphics y="351.5601602160907" z="0.0" x="852.6968260926983"/>
  </node>
  <node id="141617" label="MAN1B1" cy:nodeId="105760">
    <graphics y="885.6783547961688" z="0.0" x="923.0251952333233"/>
  </node>
  <node id="141775" label="PIGQ" cy:nodeId="105759">
    <graphics y="374.3372598254657" z="0.0" x="795.9441405458233"/>
  </node>
  <node id="141828" label="MOGS" cy:nodeId="105762">
    <graphics y="131.94646697878602" z="0.0" x="890.5850096864483"/>
  </node>
  <node id="141816" label="POMT1" cy:nodeId="105761">
    <graphics y="523.4657083117938" z="0.0" x="479.9467955751202"/>
  </node>
  <node id="141764" label="CHST12" cy:nodeId="105763">
    <graphics y="505.42872100710633" z="0.0" x="631.326647870042"/>
  </node>
  <node id="141802" label="MFNG" cy:nodeId="105766">
    <graphics y="572.9889016711688" z="0.0" x="-389.94031990339545"/>
  </node>
  <node id="141547" label="NAGK" cy:nodeId="105765">
    <graphics y="769.5152688586688" z="0.0" x="284.5606414003155"/>
  </node>
  <node id="141763" label="A4GALT" cy:nodeId="105768">
    <graphics y="930.3201394641376" z="0.0" x="1057.0755492372296"/>
  </node>
  <node id="141765" label="CEBPB" cy:nodeId="105767">
    <graphics y="560.3200784289813" z="0.0" x="877.381579510667"/>
  </node>
  <node id="141751" label="CHD2" cy:nodeId="105770">
    <graphics y="-160.0911611950421" z="0.0" x="-29.171337969801698"/>
  </node>
  <node id="141753" label="CHD1" cy:nodeId="105769">
    <graphics y="-161.1517538464093" z="0.0" x="-219.25291145612982"/>
  </node>
  <node id="141749" label="NDST2" cy:nodeId="105772">
    <graphics y="143.39998870730165" z="0.0" x="-345.1166504698017"/>
  </node>
  <node id="141825" label="OGT" cy:nodeId="105771">
    <graphics y="-9.416181031467886" z="0.0" x="52.20592033097955"/>
  </node>
  <node id="141750" label="CHD8" cy:nodeId="105774">
    <graphics y="-338.04292816281554" z="0.0" x="-352.47437752058295"/>
  </node>
  <node id="141746" label="LAMP3" cy:nodeId="105776">
    <graphics y="966.1898294055438" z="0.0" x="-647.9378174619892"/>
  </node>
  <node id="141748" label="CIITA" cy:nodeId="105775">
    <graphics y="788.5353494250751" z="0.0" x="-584.1670655088642"/>
  </node>
  <node id="141745" label="GAL3ST4" cy:nodeId="105778">
    <graphics y="650.2264504992938" z="0.0" x="-720.6117676573017"/>
  </node>
  <node id="141804" label="MAN2B1" cy:nodeId="105777">
    <graphics y="834.1037088000751" z="0.0" x="562.6125060243389"/>
  </node>
  <node id="141742" label="CPSF3L" cy:nodeId="105780">
    <graphics y="315.26029449343446" z="0.0" x="961.9989501161358"/>
  </node>
  <node id="141673" label="DSE" cy:nodeId="105779">
    <graphics y="58.374964293239145" z="0.0" x="-705.1851319151142"/>
  </node>
  <node id="141760" label="B4GALT7" cy:nodeId="105782">
    <graphics y="449.2901101672626" z="0.0" x="924.6800414247296"/>
  </node>
  <node id="141771" label="B3GALT6" cy:nodeId="105781">
    <graphics y="526.6580911242938" z="0.0" x="699.5064269227764"/>
  </node>
  <node id="141407" label="POMGNT1" cy:nodeId="105783">
    <graphics y="845.5827127063251" z="0.0" x="1140.8137694520733"/>
  </node>
  <node id="141738" label="CREB3" cy:nodeId="105786">
    <graphics y="165.22748809695008" z="0.0" x="640.0260192079327"/>
  </node>
  <node id="141736" label="CREB3L4" cy:nodeId="105788">
    <graphics y="-160.3902334606671" z="0.0" x="819.6414061708233"/>
  </node>
  <node id="141740" label="GMPPA" cy:nodeId="105787">
    <graphics y="191.26301055788758" z="0.0" x="970.1750975770733"/>
  </node>
  <node id="141782" label="B4GALT3" cy:nodeId="105789">
    <graphics y="-53.570069733860464" z="0.0" x="757.8890868348858"/>
  </node>
  <node id="141687" label="POFUT1" cy:nodeId="105792">
    <graphics y="-229.37186187863585" z="0.0" x="-595.5017823057392"/>
  </node>
  <node id="141680" label="COG7" cy:nodeId="105791">
    <graphics y="-373.77083343625304" z="0.0" x="591.821520916917"/>
  </node>
  <node id="141730" label="CTNNB1" cy:nodeId="105794">
    <graphics y="-369.3763937389874" z="0.0" x="-650.0348633604267"/>
  </node>
  <node id="141734" label="CTBP1" cy:nodeId="105793">
    <graphics y="624.0167337024188" z="0.0" x="984.8215819520733"/>
  </node>
  <node id="141778" label="SLC35B1" cy:nodeId="105798">
    <graphics y="-436.3275350964093" z="0.0" x="1223.7964965028546"/>
  </node>
  <node id="141783" label="ALG3" cy:nodeId="105797">
    <graphics y="78.70926910280946" z="0.0" x="909.917468182542"/>
  </node>
  <node id="141810" label="DPM1" cy:nodeId="105799">
    <graphics y="-804.6561788952374" z="0.0" x="279.14642631242486"/>
  </node>
  <node id="141719" label="EBF1" cy:nodeId="105804">
    <graphics y="327.7471414172626" z="0.0" x="-689.1178101377704"/>
  </node>
  <node id="141801" label="ST3GAL2" cy:nodeId="105806">
    <graphics y="411.03763824343446" z="0.0" x="-605.480236895583"/>
  </node>
  <node id="141718" label="CSGALNACT1" cy:nodeId="105805">
    <graphics y="256.12940460085633" z="0.0" x="-710.1624878721454"/>
  </node>
  <node id="141683" label="B3GALT2" cy:nodeId="105808">
    <graphics y="294.19397979616883" z="0.0" x="-403.26917732527045"/>
  </node>
  <node id="141674" label="CHST3" cy:nodeId="105807">
    <graphics y="-37.542245332004995" z="0.0" x="-852.812756426833"/>
  </node>
  <node id="141644" label="FUT4" cy:nodeId="105810">
    <graphics y="-899.5952658092999" z="0.0" x="431.3626738710186"/>
  </node>
  <node id="141711" label="TPST1" cy:nodeId="105809">
    <graphics y="163.40563445925477" z="0.0" x="-859.948010333083"/>
  </node>
  <node id="141639" label="GALNT12" cy:nodeId="105812">
    <graphics y="-382.61852020383117" z="0.0" x="651.3700133485577"/>
  </node>
  <node id="141858" label="AHR" cy:nodeId="106836">
    <graphics y="-204.18248504758117" z="0.0" x="52.17506705949518"/>
  </node>
  <node id="141867" label="PIGK" cy:nodeId="106835">
    <graphics y="-115.01600402951476" z="0.0" x="-516.752209551833"/>
  </node>
  <node id="141752" label="B3GNT2" cy:nodeId="106838">
    <graphics y="-401.12572235226867" z="0.0" x="-8.611187823317323"/>
  </node>
  <node id="141706" label="EGLN2" cy:nodeId="105813">
    <graphics y="708.3355813586688" z="0.0" x="1108.8405028505108"/>
  </node>
  <node id="141704" label="EGR2" cy:nodeId="105816">
    <graphics y="183.71259551882508" z="0.0" x="-804.5980347471454"/>
  </node>
  <node id="141788" label="ST6GALNAC3" cy:nodeId="105815">
    <graphics y="319.75614410280946" z="0.0" x="-643.8319214658954"/>
  </node>
  <node id="141731" label="UGT8" cy:nodeId="106842">
    <graphics y="-338.6444601452374" z="0.0" x="400.98314201066705"/>
  </node>
  <node id="141560" label="UAP1" cy:nodeId="105820">
    <graphics y="1.217913206813364" z="0.0" x="390.2794371766827"/>
  </node>
  <node id="141876" label="SLC35E1" cy:nodeId="106844">
    <graphics y="-557.9330343639874" z="0.0" x="-352.69764412214545"/>
  </node>
  <node id="141698" label="EHF" cy:nodeId="105819">
    <graphics y="-538.4257711803937" z="0.0" x="-61.5104492979267"/>
  </node>
  <node id="141695" label="ELF1" cy:nodeId="105822">
    <graphics y="-309.67899078488585" z="0.0" x="-114.02235115339545"/>
  </node>
  <node id="141833" label="LFNG" cy:nodeId="106846">
    <graphics y="-269.99055999875304" z="0.0" x="1021.7424803895733"/>
  </node>
  <node id="141787" label="CDK12" cy:nodeId="106848">
    <graphics y="340.5815225207782" z="0.0" x="8.100970379807677"/>
  </node>
  <node id="141871" label="COG6" cy:nodeId="105824">
    <graphics y="-281.94315094113585" z="0.0" x="-273.6004456358173"/>
  </node>
  <node id="141817" label="COG3" cy:nodeId="105823">
    <graphics y="-282.85754913449523" z="0.0" x="158.68636619279596"/>
  </node>
  <node id="141693" label="ELK3" cy:nodeId="105826">
    <graphics y="-623.6728414928937" z="0.0" x="-608.754406817458"/>
  </node>
  <node id="141726" label="DCP1A" cy:nodeId="106850">
    <graphics y="-654.6376852428937" z="0.0" x="-346.53858650495795"/>
  </node>
  <node id="141743" label="CLOCK" cy:nodeId="106849">
    <graphics y="-607.5277609264874" z="0.0" x="-470.64613045027045"/>
  </node>
  <node id="141691" label="ELL2" cy:nodeId="106852">
    <graphics y="88.28223663210633" z="0.0" x="-759.202160723708"/>
  </node>
  <node id="141692" label="ELL" cy:nodeId="105828">
    <graphics y="879.4330545032001" z="0.0" x="-543.1854981260517"/>
  </node>
  <node id="141772" label="GALT" cy:nodeId="106851">
    <graphics y="365.45057159304383" z="0.0" x="1056.6185179872296"/>
  </node>
  <node id="141688" label="ERCC6" cy:nodeId="105830">
    <graphics y="-244.16637176633117" z="0.0" x="-405.21546638777045"/>
  </node>
  <node id="141727" label="XYLT1" cy:nodeId="106854">
    <graphics y="-92.52432769894835" z="0.0" x="-710.883557208083"/>
  </node>
  <node id="141793" label="MAN1C1" cy:nodeId="106853">
    <graphics y="392.19751983523133" z="0.0" x="-763.2337769346454"/>
  </node>
  <node id="141685" label="ERG" cy:nodeId="105832">
    <graphics y="329.9196267688251" z="0.0" x="-592.577160723708"/>
  </node>
  <node id="141686" label="ERF" cy:nodeId="105831">
    <graphics y="335.1483865344501" z="0.0" x="716.952624432542"/>
  </node>
  <node id="141792" label="ST6GAL1" cy:nodeId="106855">
    <graphics y="693.6450906360126" z="0.0" x="-831.865002520583"/>
  </node>
  <node id="141682" label="GCNT4" cy:nodeId="106858">
    <graphics y="-36.61857742429015" z="0.0" x="-193.9912842588642"/>
  </node>
  <node id="141847" label="ST8SIA4" cy:nodeId="105834">
    <graphics y="259.05619293093446" z="0.0" x="-650.3773926573017"/>
  </node>
  <node id="141662" label="ST3GAL5" cy:nodeId="106857">
    <graphics y="616.1544900500751" z="0.0" x="-626.2447022276142"/>
  </node>
  <node id="141701" label="CHSY3" cy:nodeId="105833">
    <graphics y="84.31734710573915" z="0.0" x="-928.548596270583"/>
  </node>
  <node id="141714" label="MGAT4A" cy:nodeId="106860">
    <graphics y="237.17518096804383" z="0.0" x="-600.0802124815204"/>
  </node>
  <node id="141649" label="CHST7" cy:nodeId="105835">
    <graphics y="466.3327127063251" z="0.0" x="-520.6496094541767"/>
  </node>
  <node id="141697" label="GALNT7" cy:nodeId="106859">
    <graphics y="-418.75923675656554" z="0.0" x="228.10021745393487"/>
  </node>
  <node id="141710" label="CHST2" cy:nodeId="105838">
    <graphics y="476.16248565554383" z="0.0" x="-783.5150879698017"/>
  </node>
  <node id="141466" label="CHST15" cy:nodeId="106861">
    <graphics y="-194.19717926144835" z="0.0" x="-879.653088458083"/>
  </node>
  <node id="141612" label="SULT1C4" cy:nodeId="105837">
    <graphics y="65.17466216921571" z="0.0" x="-527.557873614333"/>
  </node>
  <node id="141675" label="ST8SIA1" cy:nodeId="105840">
    <graphics y="428.8028359973407" z="0.0" x="-716.5099610166767"/>
  </node>
  <node id="141720" label="GPI" cy:nodeId="106864">
    <graphics y="-294.1974081432843" z="0.0" x="1571.8707152528546"/>
  </node>
  <node id="141678" label="ETS1" cy:nodeId="105839">
    <graphics y="41.04282623171571" z="0.0" x="-660.395520098708"/>
  </node>
  <node id="141632" label="GRHL1" cy:nodeId="106866">
    <graphics y="-364.64925140500304" z="0.0" x="719.7152587098858"/>
  </node>
  <node id="141669" label="ETV1" cy:nodeId="105842">
    <graphics y="-148.21554321408507" z="0.0" x="-746.210949786208"/>
  </node>
  <node id="141554" label="HS3ST3B1" cy:nodeId="105841">
    <graphics y="-199.04533905148742" z="0.0" x="-961.935070879958"/>
  </node>
  <node id="141650" label="EXTL2" cy:nodeId="105844">
    <graphics y="-21.52325195431945" z="0.0" x="-782.7685059385517"/>
  </node>
  <node id="141862" label="MGAT2" cy:nodeId="106868">
    <graphics y="-543.4420675671124" z="0.0" x="-248.22074592878607"/>
  </node>
  <node id="141613" label="HIF1A" cy:nodeId="106867">
    <graphics y="-171.28794616818664" z="0.0" x="-509.38953865339545"/>
  </node>
  <node id="141671" label="ARSB" cy:nodeId="105843">
    <graphics y="120.72123199343446" z="0.0" x="-703.1402710752704"/>
  </node>
  <node id="141593" label="HOXB4" cy:nodeId="106870">
    <graphics y="321.3195596301532" z="0.0" x="-1152.6109742002704"/>
  </node>
  <node id="141664" label="EZH1" cy:nodeId="105846">
    <graphics y="242.0877481067157" z="0.0" x="98.5978270692608"/>
  </node>
  <node id="141716" label="SLC35B4" cy:nodeId="105845">
    <graphics y="-39.02496093869445" z="0.0" x="-608.093762286208"/>
  </node>
  <node id="141851" label="GALC" cy:nodeId="106869">
    <graphics y="-257.74031585812804" z="0.0" x="-95.61704719831732"/>
  </node>
  <node id="141583" label="IRF3" cy:nodeId="106872">
    <graphics y="298.68851714968446" z="0.0" x="883.3404418153546"/>
  </node>
  <node id="141663" label="FLI1" cy:nodeId="105848">
    <graphics y="369.31559234499696" z="0.0" x="-658.6837891416767"/>
  </node>
  <node id="141584" label="IRF2" cy:nodeId="106871">
    <graphics y="-893.8756613171124" z="0.0" x="-421.98426521589545"/>
  </node>
  <node id="141659" label="FOXA1" cy:nodeId="105850">
    <graphics y="-494.72676605344054" z="0.0" x="334.28636466691705"/>
  </node>
  <node id="141544" label="MAF" cy:nodeId="106876">
    <graphics y="109.2129159533954" z="0.0" x="-816.0853394346454"/>
  </node>
  <node id="141535" label="PIGH" cy:nodeId="105852">
    <graphics y="-1240.5743307507062" z="0.0" x="10.773196331956115"/>
  </node>
  <node id="141556" label="LEF1" cy:nodeId="106875">
    <graphics y="-73.30664205909011" z="0.0" x="-942.218518145583"/>
  </node>
  <node id="141861" label="GLCE" cy:nodeId="105851">
    <graphics y="-242.86206573605773" z="0.0" x="-265.6324280576923"/>
  </node>
  <node id="141523" label="MEIS3" cy:nodeId="106878">
    <graphics y="723.3799539172626" z="0.0" x="-732.0699585752704"/>
  </node>
  <node id="141529" label="MEF2B" cy:nodeId="106877">
    <graphics y="695.7751565539813" z="0.0" x="659.1566954774639"/>
  </node>
  <node id="141653" label="FOXO1" cy:nodeId="105856">
    <graphics y="151.73174529909852" z="0.0" x="-656.2486695127704"/>
  </node>
  <node id="141797" label="GNPNAT1" cy:nodeId="105855">
    <graphics y="-638.9762472546124" z="0.0" x="287.9237090272686"/>
  </node>
  <node id="141648" label="FOXP3" cy:nodeId="105858">
    <graphics y="598.8577981555438" z="0.0" x="-505.20301521589545"/>
  </node>
  <node id="141874" label="GFPT1" cy:nodeId="106882">
    <graphics y="-324.1963858044171" z="0.0" x="73.89854728410455"/>
  </node>
  <node id="141484" label="PPARA" cy:nodeId="106881">
    <graphics y="-188.92761749387023" z="0.0" x="-98.6579102354267"/>
  </node>
  <node id="141690" label="DSEL" cy:nodeId="105857">
    <graphics y="97.83475738405946" z="0.0" x="-631.405529864333"/>
  </node>
  <node id="141481" label="RARA" cy:nodeId="106884">
    <graphics y="408.77393585085633" z="0.0" x="621.6854125184796"/>
  </node>
  <node id="141700" label="NPL" cy:nodeId="105860">
    <graphics y="397.85450225710633" z="0.0" x="-833.2586792783954"/>
  </node>
  <node id="141702" label="SULF1" cy:nodeId="106883">
    <graphics y="80.53499847292665" z="0.0" x="-867.963879473708"/>
  </node>
  <node id="141645" label="GATA6" cy:nodeId="105862">
    <graphics y="-730.4625143444562" z="0.0" x="478.4124327821514"/>
  </node>
  <node id="141461" label="SIRT6" cy:nodeId="106885">
    <graphics y="264.71595245241883" z="0.0" x="951.1752196473858"/>
  </node>
  <node id="141451" label="SPIB" cy:nodeId="106888">
    <graphics y="1026.7778421008563" z="0.0" x="-388.2304200010517"/>
  </node>
  <node id="141814" label="ALG13" cy:nodeId="105864">
    <graphics y="95.82059722780946" z="0.0" x="138.70045005510065"/>
  </node>
  <node id="141640" label="GATAD1" cy:nodeId="105863">
    <graphics y="-90.9195589458966" z="0.0" x="434.69066154191705"/>
  </node>
  <node id="141415" label="THAP11" cy:nodeId="106890">
    <graphics y="1213.4447122180438" z="0.0" x="27.78128349015924"/>
  </node>
  <node id="141634" label="GLYR1" cy:nodeId="105866">
    <graphics y="-632.0945944225812" z="0.0" x="63.650698773362365"/>
  </node>
  <node id="141637" label="GLI2" cy:nodeId="105865">
    <graphics y="-100.62136215329406" z="0.0" x="-804.957775958083"/>
  </node>
  <node id="141628" label="GTF2B" cy:nodeId="105868">
    <graphics y="-121.45221847653625" z="0.0" x="1351.267321698167"/>
  </node>
  <node id="141741" label="COG4" cy:nodeId="106892">
    <graphics y="71.81481414675477" z="0.0" x="1100.858630291917"/>
  </node>
  <node id="141633" label="ALG1" cy:nodeId="105867">
    <graphics y="-1023.3403829967999" z="0.0" x="-12.688168414137635"/>
  </node>
  <node id="141785" label="COG8" cy:nodeId="106891">
    <graphics y="986.5728860461688" z="0.0" x="70.64107047746393"/>
  </node>
  <node id="141627" label="GTF2F1" cy:nodeId="105870">
    <graphics y="93.91068511843446" z="0.0" x="835.4442626161358"/>
  </node>
  <node id="141799" label="CTBS" cy:nodeId="105869">
    <graphics y="-142.68987793088195" z="0.0" x="-275.6159485655048"/>
  </node>
  <node id="141843" label="STT3A" cy:nodeId="106893">
    <graphics y="-706.3303732311749" z="0.0" x="-52.58753670027045"/>
  </node>
  <node id="141786" label="PIGO" cy:nodeId="105874">
    <graphics y="127.68541961550477" z="0.0" x="251.01321708390924"/>
  </node>
  <node id="141619" label="HES4" cy:nodeId="105876">
    <graphics y="801.1856790149188" z="0.0" x="874.337634198167"/>
  </node>
  <node id="141621" label="HECTD1" cy:nodeId="105875">
    <graphics y="-525.7447714245343" z="0.0" x="-480.6970948057392"/>
  </node>
  <node id="141609" label="DPAGT1" cy:nodeId="105878">
    <graphics y="-640.2114157116437" z="0.0" x="943.4541503114483"/>
  </node>
  <node id="141610" label="HINFP" cy:nodeId="105877">
    <graphics y="-377.5688681042218" z="0.0" x="1067.4116698426983"/>
  </node>
  <node id="141837" label="TSTA3" cy:nodeId="105880">
    <graphics y="142.55053192019227" z="0.0" x="1187.6331053895733"/>
  </node>
  <node id="141590" label="HSF1" cy:nodeId="105879">
    <graphics y="172.52538543581727" z="0.0" x="922.9957152528546"/>
  </node>
  <node id="141588" label="IKZF1" cy:nodeId="105882">
    <graphics y="441.5153298938251" z="0.0" x="-651.8885010557392"/>
  </node>
  <node id="141769" label="GPAA1" cy:nodeId="105881">
    <graphics y="412.61353546023133" z="0.0" x="870.2104979676983"/>
  </node>
  <node id="141712" label="LIPA" cy:nodeId="105884">
    <graphics y="349.04117828249696" z="0.0" x="-519.612561114333"/>
  </node>
  <node id="141744" label="GM2A" cy:nodeId="105883">
    <graphics y="405.49732452273133" z="0.0" x="-550.4636963682392"/>
  </node>
  <node id="141586" label="INTS3" cy:nodeId="105886">
    <graphics y="103.50704437136415" z="0.0" x="478.026095501878"/>
  </node>
  <node id="141587" label="INO80" cy:nodeId="105885">
    <graphics y="-630.2920431530499" z="0.0" x="-111.66129768659857"/>
  </node>
  <node id="141582" label="IRF4" cy:nodeId="105888">
    <graphics y="545.7984109485126" z="0.0" x="-662.8882569151142"/>
  </node>
  <node id="141585" label="IRF1" cy:nodeId="105887">
    <graphics y="1226.1493020617938" z="0.0" x="-687.6964234190204"/>
  </node>
  <node id="141578" label="IRF8" cy:nodeId="105890">
    <graphics y="443.98255401491883" z="0.0" x="-394.2478760557392"/>
  </node>
  <node id="141579" label="IRF5" cy:nodeId="105889">
    <graphics y="817.1920877063251" z="0.0" x="-258.4174622373798"/>
  </node>
  <node id="141575" label="JMJD1C" cy:nodeId="105892">
    <graphics y="-105.72781128049132" z="0.0" x="-328.71400154402045"/>
  </node>
  <node id="141574" label="JMJD6" cy:nodeId="105894">
    <graphics y="539.3748879992938" z="0.0" x="1317.4061156434796"/>
  </node>
  <node id="141676" label="MGAT5" cy:nodeId="105893">
    <graphics y="-29.432942811253042" z="0.0" x="-453.3620117979267"/>
  </node>
  <node id="141622" label="FKRP" cy:nodeId="105896">
    <graphics y="572.8477273547626" z="0.0" x="646.5733519716046"/>
  </node>
  <node id="141573" label="JUNB" cy:nodeId="105898">
    <graphics y="305.3723855578876" z="0.0" x="782.1898070497296"/>
  </node>
  <node id="141647" label="GBGT1" cy:nodeId="105897">
    <graphics y="668.3610330188251" z="0.0" x="-278.67860115339545"/>
  </node>
  <node id="141572" label="JUND" cy:nodeId="105899">
    <graphics y="456.56226592898133" z="0.0" x="997.438708416917"/>
  </node>
  <node id="141455" label="GNB1" cy:nodeId="105902">
    <graphics y="1326.1493020617938" z="0.0" x="-1321.6536682920673"/>
  </node>
  <node id="141567" label="KDM5A" cy:nodeId="105904">
    <graphics y="-309.1005148327374" z="0.0" x="-446.68714607527045"/>
  </node>
  <node id="141870" label="HS2ST1" cy:nodeId="105906">
    <graphics y="-173.37994903683898" z="0.0" x="-616.5028199033954"/>
  </node>
  <node id="141852" label="GNS" cy:nodeId="105905">
    <graphics y="-272.23912567258117" z="0.0" x="-655.7589844541767"/>
  </node>
  <node id="141566" label="KDM5B" cy:nodeId="105907">
    <graphics y="-490.9327597057843" z="0.0" x="32.75973808000299"/>
  </node>
  <node id="141732" label="HS3ST1" cy:nodeId="105910">
    <graphics y="-280.5804647839093" z="0.0" x="549.7824278993389"/>
  </node>
  <node id="141551" label="LMO2" cy:nodeId="105909">
    <graphics y="549.4221902453876" z="0.0" x="-462.10328377058295"/>
  </node>
  <node id="141550" label="RENBP" cy:nodeId="105912">
    <graphics y="619.6615701282001" z="0.0" x="-108.4318360166767"/>
  </node>
  <node id="141548" label="LYL1" cy:nodeId="105911">
    <graphics y="617.3759255969501" z="0.0" x="190.9849120301983"/>
  </node>
  <node id="141540" label="MAFB" cy:nodeId="105914">
    <graphics y="334.14664703249696" z="0.0" x="-1047.6432007627704"/>
  </node>
  <node id="141536" label="MAX" cy:nodeId="105915">
    <graphics y="-1467.1037496960187" z="0.0" x="-11.499997027418885"/>
  </node>
  <node id="141834" label="MGAT4B" cy:nodeId="105918">
    <graphics y="-132.99501937985656" z="0.0" x="744.4344359559796"/>
  </node>
  <node id="141759" label="B4GALT2" cy:nodeId="105917">
    <graphics y="433.55411773562196" z="0.0" x="1073.6321898622296"/>
  </node>
  <node id="141602" label="ST6GALNAC1" cy:nodeId="105920">
    <graphics y="-640.7944845592999" z="0.0" x="647.1830626649639"/>
  </node>
  <node id="141533" label="MECOM" cy:nodeId="105919">
    <graphics y="-577.7382101452374" z="0.0" x="579.4644957704327"/>
  </node>
  <node id="141699" label="IDS" cy:nodeId="105922">
    <graphics y="-185.45873016476867" z="0.0" x="-792.1275757627704"/>
  </node>
  <node id="141532" label="MECP2" cy:nodeId="105921">
    <graphics y="213.0014443957782" z="0.0" x="-348.3733643369892"/>
  </node>
  <node id="141531" label="MED1" cy:nodeId="105924">
    <graphics y="-575.9029745495343" z="0.0" x="-685.5257080869892"/>
  </node>
  <node id="141684" label="NDST1" cy:nodeId="105923">
    <graphics y="201.80176788210633" z="0.0" x="-625.5536011533954"/>
  </node>
  <node id="141528" label="MEF2C" cy:nodeId="105926">
    <graphics y="167.73841338991883" z="0.0" x="-719.897717364333"/>
  </node>
  <node id="141707" label="GALNT11" cy:nodeId="107974">
    <graphics y="201.57648712038758" z="0.0" x="-476.01075447370795"/>
  </node>
  <node id="141530" label="MEF2A" cy:nodeId="105925">
    <graphics y="-178.28654998898742" z="0.0" x="-551.077893145583"/>
  </node>
  <node id="141526" label="MEIS1" cy:nodeId="105928">
    <graphics y="883.4251199328876" z="0.0" x="-1240.833508379958"/>
  </node>
  <node id="141708" label="SLC35F1" cy:nodeId="105927">
    <graphics y="320.78019195437196" z="0.0" x="-855.9371460752704"/>
  </node>
  <node id="141811" label="BRD7" cy:nodeId="107977">
    <graphics y="-888.0245260632062" z="0.0" x="189.67492210099908"/>
  </node>
  <node id="141437" label="PIGX" cy:nodeId="107980">
    <graphics y="-563.2697958385968" z="0.0" x="1209.2997313661358"/>
  </node>
  <node id="141521" label="MSX1" cy:nodeId="105932">
    <graphics y="830.7923684680438" z="0.0" x="-399.8913086729267"/>
  </node>
  <node id="141522" label="MRE11A" cy:nodeId="105931">
    <graphics y="-5.14374298215148" z="0.0" x="-89.8441895323017"/>
  </node>
  <node id="141630" label="SLC35F2" cy:nodeId="107979">
    <graphics y="-640.3250021374249" z="0.0" x="552.3177062196514"/>
  </node>
  <node id="141768" label="CDX2" cy:nodeId="107982">
    <graphics y="-1338.4496969616437" z="0.0" x="669.8318968934796"/>
  </node>
  <node id="141519" label="MXD3" cy:nodeId="105933">
    <graphics y="50.23032623171571" z="0.0" x="706.5888854188702"/>
  </node>
  <node id="141589" label="RPN1" cy:nodeId="105936">
    <graphics y="-136.2732901012921" z="0.0" x="1116.7455321473858"/>
  </node>
  <node id="141739" label="B3GNT8" cy:nodeId="107983">
    <graphics y="394.5335183703876" z="0.0" x="978.753893963792"/>
  </node>
  <node id="141836" label="SLC35C2" cy:nodeId="107986">
    <graphics y="223.05472808718446" z="0.0" x="901.3463622255108"/>
  </node>
  <node id="141518" label="MYH11" cy:nodeId="105937">
    <graphics y="12.928354796168833" z="0.0" x="-993.3314331846454"/>
  </node>
  <node id="141496" label="SLC35F3" cy:nodeId="105940">
    <graphics y="673.7668557727313" z="0.0" x="-1261.944592364333"/>
  </node>
  <node id="141569" label="CHST9" cy:nodeId="105939">
    <graphics y="572.5922341907001" z="0.0" x="-942.917736895583"/>
  </node>
  <node id="141723" label="E2F4" cy:nodeId="107987">
    <graphics y="21.94304138064149" z="0.0" x="989.450427166917"/>
  </node>
  <node id="141543" label="B4GALNT1" cy:nodeId="107990">
    <graphics y="80.47765594362977" z="0.0" x="-1036.4283570127704"/>
  </node>
  <node id="141517" label="MZF1" cy:nodeId="105942">
    <graphics y="625.8316140735126" z="0.0" x="1094.0006591005108"/>
  </node>
  <node id="141425" label="HAS3" cy:nodeId="105941">
    <graphics y="-764.0535787975812" z="0.0" x="879.4565917176983"/>
  </node>
  <node id="141667" label="ST6GALNAC5" cy:nodeId="107989">
    <graphics y="-60.72860473752257" z="0.0" x="-1006.1622437315204"/>
  </node>
  <node id="141513" label="NFATC1" cy:nodeId="105944">
    <graphics y="512.4235330188251" z="0.0" x="-616.337902911208"/>
  </node>
  <node id="141514" label="NFAT5" cy:nodeId="105943">
    <graphics y="-828.4247946178937" z="0.0" x="-225.3471192198017"/>
  </node>
  <node id="141638" label="GLI1" cy:nodeId="107991">
    <graphics y="378.0180459582782" z="0.0" x="-937.4383667783954"/>
  </node>
  <node id="141607" label="HNF1B" cy:nodeId="107994">
    <graphics y="-1138.3505758678937" z="0.0" x="477.4405547303936"/>
  </node>
  <node id="141509" label="NPAT" cy:nodeId="105948">
    <graphics y="-702.4421896374249" z="0.0" x="-487.43031013777045"/>
  </node>
  <node id="141525" label="HS6ST1" cy:nodeId="107996">
    <graphics y="1083.7511087024188" z="0.0" x="-1360.268566973708"/>
  </node>
  <node id="141511" label="NIPBL" cy:nodeId="105947">
    <graphics y="-261.0667929089093" z="0.0" x="-211.9102295713642"/>
  </node>
  <node id="141605" label="HNF4A" cy:nodeId="107995">
    <graphics y="-541.4899191296124" z="0.0" x="287.7313300294659"/>
  </node>
  <node id="141878" label="SLC35D1" cy:nodeId="105950">
    <graphics y="-431.14879364133117" z="0.0" x="-308.7375000791767"/>
  </node>
  <node id="141505" label="NR2C2" cy:nodeId="105949">
    <graphics y="-308.27034515500304" z="0.0" x="-174.67405403425482"/>
  </node>
  <node id="141568" label="KDM4C" cy:nodeId="107997">
    <graphics y="-254.7171835339093" z="0.0" x="-28.872113116286073"/>
  </node>
  <node id="141658" label="GALNT3" cy:nodeId="108000">
    <graphics y="-521.3927511608624" z="0.0" x="391.6717101259014"/>
  </node>
  <node id="141820" label="PIGM" cy:nodeId="105954">
    <graphics y="-357.98009246945617" z="0.0" x="-75.4192627744892"/>
  </node>
  <node id="141838" label="NANS" cy:nodeId="108002">
    <graphics y="-78.37440485120055" z="0.0" x="907.473132245042"/>
  </node>
  <node id="141495" label="PBX1" cy:nodeId="105953">
    <graphics y="-15.643086854221792" z="0.0" x="-389.71473396589545"/>
  </node>
  <node id="141796" label="SLC35A1" cy:nodeId="108001">
    <graphics y="-361.6161093151593" z="0.0" x="524.8748656434796"/>
  </node>
  <node id="141491" label="PHF20" cy:nodeId="105956">
    <graphics y="-433.2767538464093" z="0.0" x="-684.5257080869892"/>
  </node>
  <node id="141493" label="PCGF1" cy:nodeId="105955">
    <graphics y="221.94715362429383" z="0.0" x="1144.4554320497296"/>
  </node>
  <node id="141766" label="GCNT3" cy:nodeId="108003">
    <graphics y="-937.6442160046124" z="0.0" x="543.3614073915264"/>
  </node>
  <node id="141490" label="PIAS1" cy:nodeId="105958">
    <graphics y="-194.5282186901593" z="0.0" x="-295.69166267683295"/>
  </node>
  <node id="141538" label="MAFK" cy:nodeId="108006">
    <graphics y="499.95130401491883" z="0.0" x="777.7029296083233"/>
  </node>
  <node id="141798" label="SLC17A5" cy:nodeId="108005">
    <graphics y="-461.36021942258117" z="0.0" x="-49.89637459089545"/>
  </node>
  <node id="141781" label="DAD1" cy:nodeId="108008">
    <graphics y="-346.43077606320617" z="0.0" x="1150.1382933778546"/>
  </node>
  <node id="141487" label="POLR2B" cy:nodeId="105959">
    <graphics y="-404.3657431042218" z="0.0" x="-388.4304932432392"/>
  </node>
  <node id="141537" label="CHPF2" cy:nodeId="108007">
    <graphics y="742.9008279407001" z="0.0" x="777.8267089051983"/>
  </node>
  <node id="141482" label="PRDM1" cy:nodeId="105962">
    <graphics y="35.53233581423524" z="0.0" x="-804.7559937315204"/>
  </node>
  <node id="141483" label="PPARG" cy:nodeId="105961">
    <graphics y="-191.7179922497296" z="0.0" x="582.727038495042"/>
  </node>
  <node id="141576" label="ST8SIA3" cy:nodeId="108012">
    <graphics y="656.7344461047626" z="0.0" x="-997.495373614333"/>
  </node>
  <node id="141790" label="CHST8" cy:nodeId="108011">
    <graphics y="753.8069558703876" z="0.0" x="-1065.913830645583"/>
  </node>
  <node id="141611" label="UGGT2" cy:nodeId="105966">
    <graphics y="-443.92748016476867" z="0.0" x="-609.0574463682392"/>
  </node>
  <node id="141479" label="RB1" cy:nodeId="105965">
    <graphics y="-301.7753347790265" z="0.0" x="-319.32374275495795"/>
  </node>
  <node id="141789" label="CHST10" cy:nodeId="108013">
    <graphics y="437.6572976672626" z="0.0" x="-882.775402911208"/>
  </node>
  <node id="141476" label="RBL2" cy:nodeId="105968">
    <graphics y="-213.88231414914367" z="0.0" x="-338.94251716902045"/>
  </node>
  <node id="141510" label="NOTCH1" cy:nodeId="108016">
    <graphics y="417.0593057239032" z="0.0" x="-257.42567146589545"/>
  </node>
  <node id="141642" label="B4GALNT3" cy:nodeId="108015">
    <graphics y="-594.2593283092999" z="0.0" x="365.4088164491436"/>
  </node>
  <node id="141472" label="REST" cy:nodeId="105970">
    <graphics y="-576.750325623753" z="0.0" x="-916.940686114333"/>
  </node>
  <node id="141635" label="CHST14" cy:nodeId="108018">
    <graphics y="-38.12296432614562" z="0.0" x="-1108.5125855283954"/>
  </node>
  <node id="141474" label="RCOR1" cy:nodeId="105969">
    <graphics y="-249.65909332394835" z="0.0" x="257.25689994523736"/>
  </node>
  <node id="141504" label="NR2F2" cy:nodeId="108017">
    <graphics y="90.27926116823915" z="0.0" x="-446.4213379698017"/>
  </node>
  <node id="141829" label="BCL3" cy:nodeId="111092">
    <graphics y="23.08770233034852" z="0.0" x="1167.933825604417"/>
  </node>
  <node id="141471" label="RFX1" cy:nodeId="105971">
    <graphics y="749.3996072375751" z="0.0" x="1023.319811932542"/>
  </node>
  <node id="141492" label="PDX1" cy:nodeId="108019">
    <graphics y="-748.8301290905499" z="0.0" x="66.2792235536358"/>
  </node>
  <node id="141596" label="COG2" cy:nodeId="105973">
    <graphics y="-887.3769430553937" z="0.0" x="780.5760375184796"/>
  </node>
  <node id="141803" label="CAMTA2" cy:nodeId="111093">
    <graphics y="615.8814797961688" z="0.0" x="-216.57011116316107"/>
  </node>
  <node id="141473" label="RELA" cy:nodeId="108024">
    <graphics y="27.114412840602427" z="0.0" x="833.3006468934796"/>
  </node>
  <node id="141733" label="CTBP2" cy:nodeId="111096">
    <graphics y="-166.3632025158429" z="0.0" x="372.5214110536358"/>
  </node>
  <node id="141795" label="FPGT" cy:nodeId="105976">
    <graphics y="-124.24518341183898" z="0.0" x="-166.11930549909857"/>
  </node>
  <node id="141469" label="RNF2" cy:nodeId="105975">
    <graphics y="-497.4212850964093" z="0.0" x="-127.47257698347357"/>
  </node>
  <node id="141737" label="CREB3L2" cy:nodeId="111095">
    <graphics y="84.31626373171571" z="0.0" x="-264.91273201277045"/>
  </node>
  <node id="141467" label="RUNX1" cy:nodeId="105978">
    <graphics y="-24.129247132542105" z="0.0" x="-910.3543824033954"/>
  </node>
  <node id="141468" label="RORA" cy:nodeId="105977">
    <graphics y="265.2789102160907" z="0.0" x="-500.7560547666767"/>
  </node>
  <node id="141450" label="SRC" cy:nodeId="108028">
    <graphics y="-302.4122518932843" z="0.0" x="671.5916014833233"/>
  </node>
  <node id="141553" label="ST8SIA2" cy:nodeId="105980">
    <graphics y="-122.29659408688781" z="0.0" x="-1202.3106812315204"/>
  </node>
  <node id="141542" label="SULF2" cy:nodeId="105979">
    <graphics y="193.79361968874696" z="0.0" x="-1111.406506426833"/>
  </node>
  <node id="141824" label="PIGA" cy:nodeId="108027">
    <graphics y="-103.94350189328429" z="0.0" x="44.51571952531549"/>
  </node>
  <node id="141440" label="STAT5B" cy:nodeId="108029">
    <graphics y="127.40410858034852" z="0.0" x="-554.4400147276142"/>
  </node>
  <node id="141465" label="RUNX2" cy:nodeId="105981">
    <graphics y="103.6092782580829" z="0.0" x="-1124.9051636533954"/>
  </node>
  <node id="141620" label="HES1" cy:nodeId="111101">
    <graphics y="-242.4493154919171" z="0.0" x="1102.8573485536358"/>
  </node>
  <node id="141592" label="B3GNT9" cy:nodeId="108032">
    <graphics y="211.4628701770282" z="0.0" x="-1032.3238648252704"/>
  </node>
  <node id="141428" label="TCF21" cy:nodeId="108031">
    <graphics y="330.7404275500751" z="0.0" x="-757.250012286208"/>
  </node>
  <node id="141460" label="SIX5" cy:nodeId="105986">
    <graphics y="451.2140603625751" z="0.0" x="818.3257323426983"/>
  </node>
  <node id="141563" label="KLF10" cy:nodeId="111106">
    <graphics y="-730.2555441296124" z="0.0" x="-769.3429688291767"/>
  </node>
  <node id="141696" label="B3GALT5" cy:nodeId="108034">
    <graphics y="-581.9124044811749" z="0.0" x="144.4976531190655"/>
  </node>
  <node id="141555" label="HS3ST3A1" cy:nodeId="108033">
    <graphics y="-232.77100128293273" z="0.0" x="-1329.696057208083"/>
  </node>
  <node id="141705" label="ARSA" cy:nodeId="111105">
    <graphics y="698.5181985461688" z="0.0" x="941.8748046083233"/>
  </node>
  <node id="141882" label="UGCG" cy:nodeId="105985">
    <graphics y="-157.37224334836242" z="0.0" x="-329.78468025495795"/>
  </node>
  <node id="141418" label="TFDP1" cy:nodeId="108036">
    <graphics y="-908.1783346569562" z="0.0" x="-531.5333985166767"/>
  </node>
  <node id="141422" label="TEAD4" cy:nodeId="108035">
    <graphics y="-15.974286500217886" z="0.0" x="1290.197009198167"/>
  </node>
  <node id="141502" label="NR4A1" cy:nodeId="111109">
    <graphics y="1133.6539407336688" z="0.0" x="-916.827404864333"/>
  </node>
  <node id="141571" label="SLC35E4" cy:nodeId="111112">
    <graphics y="720.0390115344501" z="0.0" x="1272.411120526292"/>
  </node>
  <node id="141449" label="SRCAP" cy:nodeId="105994">
    <graphics y="-557.5163473522687" z="0.0" x="880.6531859559796"/>
  </node>
  <node id="141452" label="SPDEF" cy:nodeId="105993">
    <graphics y="-646.7435202038312" z="0.0" x="776.099352948167"/>
  </node>
  <node id="141446" label="SRF" cy:nodeId="105996">
    <graphics y="577.9977517688251" z="0.0" x="-766.8026245908954"/>
  </node>
  <node id="141448" label="SREBF2" cy:nodeId="105995">
    <graphics y="1326.1493020617938" z="0.0" x="-1221.6536682920673"/>
  </node>
  <node id="141670" label="B3GALNT1" cy:nodeId="111115">
    <graphics y="-117.65982193112609" z="0.0" x="-898.056408770583"/>
  </node>
  <node id="141869" label="GANAB" cy:nodeId="105998">
    <graphics y="-376.1769308483624" z="0.0" x="-430.62879646589545"/>
  </node>
  <node id="141442" label="STAT4" cy:nodeId="106002">
    <graphics y="456.9248757922626" z="0.0" x="-591.9264038877704"/>
  </node>
  <node id="141444" label="STAT2" cy:nodeId="106001">
    <graphics y="375.81766754030946" z="0.0" x="-356.32264412214545"/>
  </node>
  <node id="141436" label="SUMO2" cy:nodeId="106004">
    <graphics y="1326.1493020617938" z="0.0" x="-1022.0868424253681"/>
  </node>
  <node id="141441" label="STAT5A" cy:nodeId="106003">
    <graphics y="559.7988381946063" z="0.0" x="-311.66151130964545"/>
  </node>
  <node id="141432" label="TAF1" cy:nodeId="106006">
    <graphics y="-215.79985565304992" z="0.0" x="-190.39359749128607"/>
  </node>
  <node id="141435" label="COG1" cy:nodeId="106005">
    <graphics y="1335.4468789660907" z="0.0" x="-922.5200165586689"/>
  </node>
  <node id="141427" label="TCF7" cy:nodeId="106008">
    <graphics y="973.8205667102313" z="0.0" x="-1009.5677613096454"/>
  </node>
  <node id="141429" label="TCF12" cy:nodeId="106007">
    <graphics y="-226.82536834836242" z="0.0" x="-520.8695191221454"/>
  </node>
  <node id="141426" label="TCF7L2" cy:nodeId="106010">
    <graphics y="-439.39705413937804" z="0.0" x="537.6943541688702"/>
  </node>
  <node id="141848" label="GALNT1" cy:nodeId="106014">
    <graphics y="-150.2226995861554" z="0.0" x="-664.1173218565204"/>
  </node>
  <node id="141424" label="TEAD1" cy:nodeId="106013">
    <graphics y="-92.05305999875304" z="0.0" x="-641.3144043760517"/>
  </node>
  <node id="141420" label="TET2" cy:nodeId="106016">
    <graphics y="-99.47597068906066" z="0.0" x="-254.91163337995795"/>
  </node>
  <node id="141413" label="USF2" cy:nodeId="106022">
    <graphics y="620.6112771594501" z="0.0" x="416.70897208879205"/>
  </node>
  <node id="141414" label="USF1" cy:nodeId="106021">
    <graphics y="311.3276162707782" z="0.0" x="1020.058825604417"/>
  </node>
  <node id="141411" label="VEZF1" cy:nodeId="106023">
    <graphics y="-202.41834015012023" z="0.0" x="-434.1889160948017"/>
  </node>
  <node id="141409" label="YAP1" cy:nodeId="106026">
    <graphics y="-331.5902304089093" z="0.0" x="-290.35462654402045"/>
  </node>
  <node id="141410" label="XRN2" cy:nodeId="106025">
    <graphics y="-330.2915548717999" z="0.0" x="-398.96448982527045"/>
  </node>
  <node id="141857" label="GALNT5" cy:nodeId="106027">
    <graphics y="-320.95621246457335" z="0.0" x="320.3380614442608"/>
  </node>
  <node id="141770" label="B3GALT4" cy:nodeId="106030">
    <graphics y="242.78138213991883" z="0.0" x="835.0090819520733"/>
  </node>
  <node id="141408" label="ZBTB17" cy:nodeId="106029">
    <graphics y="521.3658547961688" z="0.0" x="849.3949462098858"/>
  </node>
  <node id="141809" label="C1GALT1C1" cy:nodeId="106032">
    <graphics y="-677.0402120983624" z="0.0" x="417.04620658586236"/>
  </node>
  <node id="141784" label="CDK7" cy:nodeId="118328">
    <graphics y="-209.6125692760968" z="0.0" x="932.6034423036358"/>
  </node>
  <node id="141646" label="FOXQ1" cy:nodeId="118330">
    <graphics y="170.0228067004657" z="0.0" x="1474.168933026292"/>
  </node>
  <node id="141666" label="ETV7" cy:nodeId="118329">
    <graphics y="356.30582671999696" z="0.0" x="1455.665026776292"/>
  </node>
  <node id="141595" label="HOXA13" cy:nodeId="118332">
    <graphics y="-1001.7869772350812" z="0.0" x="131.58448325822565"/>
  </node>
  <node id="141599" label="HNF4G" cy:nodeId="118331">
    <graphics y="-524.3805441296124" z="0.0" x="204.31864463517877"/>
  </node>
  <node id="141577" label="ISL1" cy:nodeId="118334">
    <graphics y="489.53467803835633" z="0.0" x="-990.853772051833"/>
  </node>
  <node id="141594" label="HOXA4" cy:nodeId="118333">
    <graphics y="839.1452127063251" z="0.0" x="-695.188977129958"/>
  </node>
  <node id="141500" label="OVOL2" cy:nodeId="118336">
    <graphics y="-1210.6231588757062" z="0.0" x="1020.465808026292"/>
  </node>
  <node id="141541" label="MANBA" cy:nodeId="118335">
    <graphics y="-257.20262664914367" z="0.0" x="-828.719494708083"/>
  </node>
  <node id="141464" label="RXRG" cy:nodeId="118338">
    <graphics y="582.4657693469501" z="0.0" x="-1046.3470581846454"/>
  </node>
  <node id="141480" label="RARG" cy:nodeId="118337">
    <graphics y="-71.97616458297011" z="0.0" x="834.6575194520733"/>
  </node>
  <node id="141679" label="HYAL3" cy:nodeId="113220">
    <graphics y="179.9709725940204" z="0.0" x="1343.7188597841046"/>
  </node>
  <node id="141419" label="TFAP2A" cy:nodeId="118340">
    <graphics y="134.22245269655946" z="0.0" x="727.5149413270733"/>
  </node>
  <node id="141445" label="STAG1" cy:nodeId="118339">
    <graphics y="-453.48396820187804" z="0.0" x="-1138.730725176833"/>
  </node>
  <node id="141656" label="GMDS" cy:nodeId="113219">
    <graphics y="-718.6962179577374" z="0.0" x="589.8335143251202"/>
  </node>
  <node id="141524" label="CHST4" cy:nodeId="113221">
    <graphics y="986.9480081164813" z="0.0" x="-1452.5291870908954"/>
  </node>
  <node id="141494" label="PBX3" cy:nodeId="113231">
    <graphics y="256.0791726672626" z="0.0" x="-819.236828692458"/>
  </node>
  <node id="141475" label="RBPJ" cy:nodeId="113233">
    <graphics y="-406.5531515514874" z="0.0" x="-840.353527911208"/>
  </node>
  <node id="141823" label="BHLHE40" cy:nodeId="112215">
    <graphics y="-222.71007293820617" z="0.0" x="490.686495892503"/>
  </node>
  <node id="141616" label="HEXIM1" cy:nodeId="112221">
    <graphics y="371.2834268176532" z="0.0" x="1222.5594359559796"/>
  </node>
  <node id="141835" label="B3GNT3" cy:nodeId="112223">
    <graphics y="-183.2712835705304" z="0.0" x="677.6405821962139"/>
  </node>
  <node id="141604" label="B4GALT4" cy:nodeId="112227">
    <graphics y="-413.37389129758117" z="0.0" x="374.535372845628"/>
  </node>
  <node id="141641" label="ARSD" cy:nodeId="112230">
    <graphics y="-817.2531637585187" z="0.0" x="402.7582579774639"/>
  </node>
  <node id="141438" label="SUMO1" cy:nodeId="112231">
    <graphics y="-327.69974273801085" z="0.0" x="919.671862713792"/>
  </node>
  <node id="141826" label="BCL6" cy:nodeId="107275">
    <graphics y="51.05160766482118" z="0.0" x="-11.164669878981385"/>
  </node>
  <node id="141845" label="FUT10" cy:nodeId="107278">
    <graphics y="-457.65367645383117" z="0.0" x="-185.99284065534857"/>
  </node>
  <node id="141813" label="BRD3" cy:nodeId="107277">
    <graphics y="-93.80629867673156" z="0.0" x="-90.52427376081732"/>
  </node>
  <node id="141629" label="B4GALT5" cy:nodeId="107279">
    <graphics y="-265.72318023801085" z="0.0" x="397.233859173753"/>
  </node>
  <node id="141694" label="SLC35B3" cy:nodeId="107281">
    <graphics y="97.37908416628602" z="0.0" x="-147.43491829206732"/>
  </node>
  <node id="141779" label="ALG8" cy:nodeId="107286">
    <graphics y="-450.3964132702374" z="0.0" x="722.8674803895733"/>
  </node>
  <node id="141597" label="FUT6" cy:nodeId="107288">
    <graphics y="-910.3647970592999" z="0.0" x="327.7200194520733"/>
  </node>
  <node id="141755" label="FUT2" cy:nodeId="107287">
    <graphics y="-502.6085714733624" z="0.0" x="644.4326964540264"/>
  </node>
  <node id="141651" label="ASAH1" cy:nodeId="107290">
    <graphics y="-80.71080822110412" z="0.0" x="-471.0406006651142"/>
  </node>
  <node id="141499" label="FUT3" cy:nodeId="107289">
    <graphics y="-1370.0202536022687" z="0.0" x="1140.2982665223858"/>
  </node>
  <node id="141729" label="PAPSS1" cy:nodeId="107291">
    <graphics y="-476.7523703014874" z="0.0" x="-767.2935913877704"/>
  </node>
  <node id="141832" label="HK1" cy:nodeId="107293">
    <graphics y="-272.3463644421124" z="0.0" x="749.4961424989483"/>
  </node>
  <node id="141660" label="FOSL2" cy:nodeId="107295">
    <graphics y="-323.65889495969054" z="0.0" x="-734.2614258604267"/>
  </node>
  <node id="141565" label="ALG11" cy:nodeId="107300">
    <graphics y="-886.5039572155499" z="0.0" x="-37.66004646589545"/>
  </node>
  <node id="141672" label="EXTL3" cy:nodeId="107299">
    <graphics y="185.52918487429383" z="0.0" x="-926.9461792783954"/>
  </node>
  <node id="141631" label="GRHL2" cy:nodeId="107301">
    <graphics y="-455.7876181042218" z="0.0" x="431.045138470628"/>
  </node>
  <node id="141626" label="HDAC1" cy:nodeId="107303">
    <graphics y="-303.0260214245343" z="0.0" x="619.2358885926983"/>
  </node>
  <node id="141728" label="EXT2" cy:nodeId="107307">
    <graphics y="-298.0439199841046" z="0.0" x="-926.7259644346454"/>
  </node>
  <node id="141581" label="NAAA" cy:nodeId="107310">
    <graphics y="964.5514016711688" z="0.0" x="-796.7010620908954"/>
  </node>
  <node id="141570" label="KAT2B" cy:nodeId="107312">
    <graphics y="189.67939239382508" z="0.0" x="-549.8745850401142"/>
  </node>
  <node id="141559" label="KLF5" cy:nodeId="107318">
    <graphics y="-466.14571136594054" z="0.0" x="494.4137755555889"/>
  </node>
  <node id="141562" label="KLF4" cy:nodeId="107317">
    <graphics y="-131.34435409665343" z="0.0" x="498.05443107316705"/>
  </node>
  <node id="141600" label="ABO" cy:nodeId="107319">
    <graphics y="-773.8599142467999" z="0.0" x="186.4521628541729"/>
  </node>
  <node id="141534" label="MBD3" cy:nodeId="107323">
    <graphics y="583.8934426867938" z="0.0" x="789.1200438661358"/>
  </node>
  <node id="141515" label="NCOR2" cy:nodeId="107326">
    <graphics y="601.9106546008563" z="0.0" x="714.058581463792"/>
  </node>
  <node id="141527" label="MEF2D" cy:nodeId="107325">
    <graphics y="-55.72198814511535" z="0.0" x="259.80890571305963"/>
  </node>
  <node id="141717" label="PAPSS2" cy:nodeId="107328">
    <graphics y="202.8240762317157" z="0.0" x="-680.4544190244892"/>
  </node>
  <node id="141758" label="POFUT2" cy:nodeId="107327">
    <graphics y="360.3079629504657" z="0.0" x="484.8530303163311"/>
  </node>
  <node id="141512" label="NFYB" cy:nodeId="107330">
    <graphics y="25.03007751345399" z="0.0" x="-860.7047242002704"/>
  </node>
  <node id="141850" label="B4GALT6" cy:nodeId="107331">
    <graphics y="148.68372588991883" z="0.0" x="-424.53931892683295"/>
  </node>
  <node id="141501" label="NRF1" cy:nodeId="107333">
    <graphics y="330.99222808718446" z="0.0" x="-151.64634407331732"/>
  </node>
  <node id="141488" label="PML" cy:nodeId="107336">
    <graphics y="153.8314004504657" z="0.0" x="805.716540448167"/>
  </node>
  <node id="141780" label="SLC35A2" cy:nodeId="107335">
    <graphics y="-240.20853180051085" z="0.0" x="815.7126952333233"/>
  </node>
  <node id="141463" label="RYBP" cy:nodeId="107338">
    <graphics y="-213.2824911510968" z="0.0" x="-681.762219317458"/>
  </node>
  <node id="141458" label="SMAD3" cy:nodeId="107342">
    <graphics y="-386.02681488156554" z="0.0" x="470.8204528016827"/>
  </node>
  <node id="141459" label="SMAD1" cy:nodeId="107341">
    <graphics y="-134.9979872143292" z="0.0" x="-471.4750489073017"/>
  </node>
  <node id="141439" label="STAT6" cy:nodeId="107348">
    <graphics y="-515.462972108128" z="0.0" x="527.1335021180889"/>
  </node>
  <node id="141443" label="STAT3" cy:nodeId="107347">
    <graphics y="4.798967894313364" z="0.0" x="-559.6289795713642"/>
  </node>
  <node id="141865" label="LAMP2" cy:nodeId="107350">
    <graphics y="-289.168279114964" z="0.0" x="-569.5523804502704"/>
  </node>
  <node id="141433" label="SVIL" cy:nodeId="107349">
    <graphics y="-263.62122100949523" z="0.0" x="-1176.1937378721454"/>
  </node>
  <node id="141421" label="TERF2" cy:nodeId="107353">
    <graphics y="1199.0018411242938" z="0.0" x="152.8255873842022"/>
  </node>
  <node id="141412" label="VDR" cy:nodeId="107356">
    <graphics y="303.1058145129657" z="0.0" x="-1463.8065308408954"/>
  </node>
  <node id="141665" label="SULT1C2" cy:nodeId="116604">
    <graphics y="440.7416482532001" z="0.0" x="1696.4612914247296"/>
  </node>
  <node id="141606" label="GAL3ST1" cy:nodeId="116603">
    <graphics y="-1042.0417379772687" z="0.0" x="500.2154112977764"/>
  </node>
  <node id="141657" label="FOXA2" cy:nodeId="116606">
    <graphics y="-832.2432760632062" z="0.0" x="629.5697814149639"/>
  </node>
  <node id="141655" label="SLC35D2" cy:nodeId="116605">
    <graphics y="-612.0876364147687" z="0.0" x="489.4460478944561"/>
  </node>
  <node id="141552" label="LMNA" cy:nodeId="116608">
    <graphics y="1027.2882180774188" z="0.0" x="937.7046996278546"/>
  </node>
  <node id="141430" label="TBX3" cy:nodeId="116610">
    <graphics y="309.2106729114032" z="0.0" x="-969.0902222471454"/>
  </node>
</graph>
