# Supplementary material for: A systems-based framework to computationally describe putative transcription factors and signaling pathways regulating glycan biosynthesis
Source: publisher site journal article supplement (doi:10.3762/bjoc.17.119), 2021-07-22
Supplement: Additional file 2 [file 1860-5397-17-119-S2.cys › CytoscapeSession-2021_03_21-12_01/views/120164-135031-PCPG.xgmml]

<?xml version="1.0" encoding="UTF-8" standalone="yes"?>
<graph id="135031" label="PCPG" cy:view="1" cy:networkId="120164" cy:visualStyle="default" cy:rendererId="org.cytoscape.ding" cy:documentVersion="3.0" xmlns:dc="http://purl.org/dc/elements/1.1/" xmlns:xlink="http://www.w3.org/1999/xlink" xmlns:rdf="http://www.w3.org/1999/02/22-rdf-syntax-ns#" xmlns:cy="http://www.cytoscape.org" xmlns="http://www.cs.rpi.edu/XGMML">
  <graphics>
    <att name="NETWORK_NODE_SELECTION" value="true" type="string" cy:type="String"/>
    <att name="NETWORK_CENTER_X_LOCATION" value="446.13250732421875" type="string" cy:type="String"/>
    <att name="NETWORK_HEIGHT" value="510.0" type="string" cy:type="String"/>
    <att name="NETWORK_TITLE" value="PCPG" type="string" cy:type="String"/>
    <att name="NETWORK_EDGE_SELECTION" value="true" type="string" cy:type="String"/>
    <att name="NETWORK_CENTER_Y_LOCATION" value="351.6624755859375" type="string" cy:type="String"/>
    <att name="NETWORK_WIDTH" value="1312.0" type="string" cy:type="String"/>
    <att name="NETWORK_DEPTH" value="0.0" type="string" cy:type="String"/>
    <att name="NETWORK_SCALE_FACTOR" value="0.13313018520499556" type="string" cy:type="String"/>
    <att name="NETWORK_ANNOTATION_SELECTION" value="false" type="string" cy:type="String"/>
    <att name="NETWORK_CENTER_Z_LOCATION" value="0.0" type="string" cy:type="String"/>
  </graphics>
  <node id="135078" label="RBL2" cy:nodeId="105968">
    <graphics y="-1057.1106491530725" z="0.0" x="-571.076636102669"/>
  </node>
  <node id="135081" label="RBBP5" cy:nodeId="105967">
    <graphics y="-842.9088364089318" z="0.0" x="-709.381811883919"/>
  </node>
  <node id="135101" label="NR2F2" cy:nodeId="108017">
    <graphics y="938.747138932865" z="0.0" x="1431.7245113582685"/>
  </node>
  <node id="135074" label="RFX5" cy:nodeId="105972">
    <graphics y="-620.3259811843225" z="0.0" x="-724.9957034854815"/>
  </node>
  <node id="135258" label="ATF5" cy:nodeId="111091">
    <graphics y="1950.1151504074744" z="0.0" x="-360.9693591861651"/>
  </node>
  <node id="135072" label="RFX7" cy:nodeId="105974">
    <graphics y="-1157.3142624343225" z="0.0" x="-482.6148746280596"/>
  </node>
  <node id="135227" label="CD59" cy:nodeId="111094">
    <graphics y="2211.272560075443" z="0.0" x="-534.351652887337"/>
  </node>
  <node id="135083" label="PRDM4" cy:nodeId="108021">
    <graphics y="-1427.7388840163537" z="0.0" x="-1007.8745487003252"/>
  </node>
  <node id="135115" label="FPGT" cy:nodeId="105976">
    <graphics y="-1202.67693333276" z="0.0" x="-669.3287112979815"/>
  </node>
  <node id="135191" label="POMT2" cy:nodeId="108023">
    <graphics y="-352.6756439650842" z="0.0" x="-104.17281987952447"/>
  </node>
  <node id="135205" label="CREB3L2" cy:nodeId="111095">
    <graphics y="-423.09327320702755" z="0.0" x="-397.11734655188775"/>
  </node>
  <node id="135193" label="GLA" cy:nodeId="108026">
    <graphics y="1940.8175735031775" z="0.0" x="-859.6698367862627"/>
  </node>
  <node id="135069" label="SCML2" cy:nodeId="108025">
    <graphics y="-1354.7188034499475" z="0.0" x="-515.8489139347002"/>
  </node>
  <node id="135179" label="SULF2" cy:nodeId="105979">
    <graphics y="1090.9274367844275" z="0.0" x="1150.9408199520185"/>
  </node>
  <node id="135051" label="STAT5B" cy:nodeId="108029">
    <graphics y="-302.38120274193966" z="0.0" x="-1156.8516605167315"/>
  </node>
  <node id="135169" label="B3GNT9" cy:nodeId="108032">
    <graphics y="1940.8175735031775" z="0.0" x="-1401.38952520179"/>
  </node>
  <node id="135283" label="UGCG" cy:nodeId="105985">
    <graphics y="-943.3428879226037" z="0.0" x="-470.8914859561846"/>
  </node>
  <node id="135060" label="SMARCC2" cy:nodeId="105988">
    <graphics y="1950.1151504074744" z="0.0" x="-560.5361850528643"/>
  </node>
  <node id="135063" label="SMAD4" cy:nodeId="105987">
    <graphics y="-977.007743879635" z="0.0" x="-351.43179967688775"/>
  </node>
  <node id="135058" label="SMC3" cy:nodeId="105990">
    <graphics y="-817.5414047683068" z="0.0" x="-611.7716434268877"/>
  </node>
  <node id="135261" label="ATF4" cy:nodeId="108550">
    <graphics y="1.3396682297400275" z="0.0" x="1780.6498043270185"/>
  </node>
  <node id="135108" label="GCNT1" cy:nodeId="108552">
    <graphics y="-1352.015556379635" z="0.0" x="23.92052766991401"/>
  </node>
  <node id="135053" label="SOX17" cy:nodeId="105992">
    <graphics y="636.4127883469275" z="0.0" x="1167.383080694206"/>
  </node>
  <node id="135186" label="SLC35E4" cy:nodeId="111112">
    <graphics y="578.4489211594275" z="0.0" x="749.1099483699873"/>
  </node>
  <node id="135056" label="SOX10" cy:nodeId="105991">
    <graphics y="1992.5849074875525" z="0.0" x="-1737.506438043587"/>
  </node>
  <node id="135200" label="ALG9" cy:nodeId="108554">
    <graphics y="561.9418410813025" z="0.0" x="-1243.1519534854815"/>
  </node>
  <node id="135278" label="DDOST" cy:nodeId="108555">
    <graphics y="1940.8175735031775" z="0.0" x="-260.9693591861651"/>
  </node>
  <node id="135203" label="PIGC" cy:nodeId="108558">
    <graphics y="179.49408717505253" z="0.0" x="2213.702904912956"/>
  </node>
  <node id="135282" label="GANAB" cy:nodeId="105998">
    <graphics y="-786.917411848385" z="0.0" x="-691.6749027042315"/>
  </node>
  <node id="135206" label="GALE" cy:nodeId="108559">
    <graphics y="249.72180934302128" z="0.0" x="1534.140404912956"/>
  </node>
  <node id="135047" label="SUMO2" cy:nodeId="106004">
    <graphics y="280.2695388352088" z="0.0" x="2133.675561162956"/>
  </node>
  <node id="135216" label="CEBPZ" cy:nodeId="108564">
    <graphics y="-1312.1008835280725" z="0.0" x="-640.5095584659502"/>
  </node>
  <node id="135132" label="COG1" cy:nodeId="106005">
    <graphics y="-357.8048248732873" z="0.0" x="-983.5450809268877"/>
  </node>
  <node id="135039" label="TEAD1" cy:nodeId="106013">
    <graphics y="-1017.156181379635" z="0.0" x="-509.3750980167315"/>
  </node>
  <node id="135036" label="TET2" cy:nodeId="106016">
    <graphics y="-876.5571518386193" z="0.0" x="-17.72876241492486"/>
  </node>
  <node id="135038" label="TERF1" cy:nodeId="106015">
    <graphics y="-547.1226883376428" z="0.0" x="-603.9021365909502"/>
  </node>
  <node id="135190" label="EPAS1" cy:nodeId="108577">
    <graphics y="571.5580520188025" z="0.0" x="868.937768194206"/>
  </node>
  <node id="135177" label="EXT1" cy:nodeId="108580">
    <graphics y="1071.1791457688025" z="0.0" x="1443.105004522331"/>
  </node>
  <node id="135232" label="ST3GAL1" cy:nodeId="108579">
    <graphics y="920.65656276099" z="0.0" x="1213.332543584831"/>
  </node>
  <node id="135033" label="USF2" cy:nodeId="106022">
    <graphics y="479.3180007492713" z="0.0" x="1996.4627926082685"/>
  </node>
  <node id="135197" label="B3GALT4" cy:nodeId="106030">
    <graphics y="791.080146745365" z="0.0" x="2393.426537725456"/>
  </node>
  <node id="135127" label="SULT1A3" cy:nodeId="108594">
    <graphics y="812.06623072974" z="0.0" x="2242.606469366081"/>
  </node>
  <node id="135126" label="MAFF" cy:nodeId="108598">
    <graphics y="1517.5600051438025" z="0.0" x="1428.1490719051435"/>
  </node>
  <node id="135225" label="CDK7" cy:nodeId="118328">
    <graphics y="2201.974983171146" z="0.0" x="-1232.6189563541338"/>
  </node>
  <node id="135087" label="MANBA" cy:nodeId="118335">
    <graphics y="-1036.5322189772912" z="0.0" x="-822.1006839542315"/>
  </node>
  <node id="135080" label="RBCK1" cy:nodeId="108610">
    <graphics y="68.96320338599003" z="0.0" x="2723.584496709831"/>
  </node>
  <node id="135070" label="SATB1" cy:nodeId="108614">
    <graphics y="-704.7211533034631" z="0.0" x="-113.11644628333306"/>
  </node>
  <node id="135071" label="RING1" cy:nodeId="108613">
    <graphics y="428.2906569992713" z="0.0" x="1875.8263179988935"/>
  </node>
  <node id="135130" label="LEO1" cy:nodeId="113227">
    <graphics y="-1341.2500534499475" z="0.0" x="-329.0474612979815"/>
  </node>
  <node id="135046" label="SUPT5H" cy:nodeId="108622">
    <graphics y="113.95844264380253" z="0.0" x="2357.908715459831"/>
  </node>
  <node id="135042" label="TAL1" cy:nodeId="108624">
    <graphics y="743.211494401615" z="0.0" x="1462.488061162956"/>
  </node>
  <node id="135097" label="PBX3" cy:nodeId="113231">
    <graphics y="-149.13445286400997" z="0.0" x="-594.2956912784502"/>
  </node>
  <node id="135075" label="RBPJ" cy:nodeId="113233">
    <graphics y="149.49799342505253" z="0.0" x="1605.518090459831"/>
  </node>
  <node id="135211" label="CHD7" cy:nodeId="112217">
    <graphics y="-740.4390488112756" z="0.0" x="48.67344019127631"/>
  </node>
  <node id="135055" label="ST6GALNAC2" cy:nodeId="112225">
    <graphics y="2044.2691726242713" z="0.0" x="-1831.3194339542315"/>
  </node>
  <node id="135059" label="ARSD" cy:nodeId="112230">
    <graphics y="1940.8175735031775" z="0.0" x="-660.1030109195635"/>
  </node>
  <node id="135049" label="SUMO1" cy:nodeId="112231">
    <graphics y="2201.974983171146" z="0.0" x="-1831.3194339542315"/>
  </node>
  <node id="135148" label="GLB1" cy:nodeId="109675">
    <graphics y="-1403.73455052026" z="0.0" x="-828.7450320987627"/>
  </node>
  <node id="135172" label="XYLT2" cy:nodeId="109684">
    <graphics y="-1174.8430710280725" z="0.0" x="-1193.2876956729815"/>
  </node>
  <node id="135239" label="PIGG" cy:nodeId="109689">
    <graphics y="-1153.2252121413537" z="0.0" x="-574.3118655948565"/>
  </node>
  <node id="135133" label="LARP7" cy:nodeId="110798">
    <graphics y="-258.12058262475216" z="0.0" x="-944.6061160831377"/>
  </node>
  <node id="135217" label="SGSH" cy:nodeId="110804">
    <graphics y="18.371589616458778" z="0.0" x="2011.154320928581"/>
  </node>
  <node id="135050" label="GALK2" cy:nodeId="110806">
    <graphics y="-389.04848484643185" z="0.0" x="-1068.218481805794"/>
  </node>
  <node id="135291" label="AFF4" cy:nodeId="105686">
    <graphics y="-829.1067123854943" z="0.0" x="-558.0311038761065"/>
  </node>
  <node id="135170" label="FUT7" cy:nodeId="105685">
    <graphics y="2101.974983171146" z="0.0" x="-1543.5423877506182"/>
  </node>
  <node id="135289" label="STT3B" cy:nodeId="105688">
    <graphics y="-718.7043076003381" z="0.0" x="-450.0584781436846"/>
  </node>
  <node id="135290" label="MAN1A2" cy:nodeId="105687">
    <graphics y="-761.18181614526" z="0.0" x="-575.9678104190752"/>
  </node>
  <node id="135287" label="FUT11" cy:nodeId="105690">
    <graphics y="-725.0084152663537" z="0.0" x="-529.826880243294"/>
  </node>
  <node id="135288" label="NEU3" cy:nodeId="105689">
    <graphics y="-889.5710678542443" z="0.0" x="-528.940161493294"/>
  </node>
  <node id="135284" label="COG5" cy:nodeId="105692">
    <graphics y="-704.05681614526" z="0.0" x="-616.3605106143877"/>
  </node>
  <node id="135057" label="SNAPC5" cy:nodeId="110811">
    <graphics y="-1201.1320724929162" z="0.0" x="-192.1044223575518"/>
  </node>
  <node id="135285" label="ACER2" cy:nodeId="105691">
    <graphics y="-842.2358322585412" z="0.0" x="-508.39627721595025"/>
  </node>
  <node id="135286" label="MAN2A1" cy:nodeId="105694">
    <graphics y="-964.0662460769006" z="0.0" x="-735.9282596378252"/>
  </node>
  <node id="135266" label="SLC35F5" cy:nodeId="105696">
    <graphics y="-424.7021789992639" z="0.0" x="-687.2760379581377"/>
  </node>
  <node id="135236" label="SLC35A3" cy:nodeId="105695">
    <graphics y="-967.6485825026818" z="0.0" x="-683.1612308292315"/>
  </node>
  <node id="135114" label="GALNT10" cy:nodeId="105697">
    <graphics y="-1156.36101536401" z="0.0" x="-914.4504764347002"/>
  </node>
  <node id="135273" label="RTF1" cy:nodeId="105700">
    <graphics y="-878.8403244460412" z="0.0" x="-451.1705386905596"/>
  </node>
  <node id="135118" label="SLC35A5" cy:nodeId="105702">
    <graphics y="-638.6119003737756" z="0.0" x="-651.1638553409502"/>
  </node>
  <node id="135274" label="ATF1" cy:nodeId="105701">
    <graphics y="-850.7628403151818" z="0.0" x="-376.9736392764971"/>
  </node>
  <node id="135267" label="ATF2" cy:nodeId="105704">
    <graphics y="-713.5299301589318" z="0.0" x="-698.0481937198565"/>
  </node>
  <node id="135263" label="ATF3" cy:nodeId="105706">
    <graphics y="1840.8175735031775" z="0.0" x="1518.575951787956"/>
  </node>
  <node id="135153" label="UGGT1" cy:nodeId="105705">
    <graphics y="-1490.809989973385" z="0.0" x="-618.0702274112627"/>
  </node>
  <node id="135165" label="HAS1" cy:nodeId="105708">
    <graphics y="1540.03595729224" z="0.0" x="1345.238061162956"/>
  </node>
  <node id="135262" label="B3GNT5" cy:nodeId="105707">
    <graphics y="1710.7116164719275" z="0.0" x="1486.603295537956"/>
  </node>
  <node id="135164" label="HAS2" cy:nodeId="105709">
    <graphics y="1533.51154322974" z="0.0" x="1224.383813116081"/>
  </node>
  <node id="135256" label="ATRX" cy:nodeId="105712">
    <graphics y="-308.12107090600216" z="0.0" x="-332.8186099796221"/>
  </node>
  <node id="135247" label="ALG10" cy:nodeId="105711">
    <graphics y="-1070.6003952468225" z="0.0" x="-476.93631627845025"/>
  </node>
  <node id="135255" label="FKTN" cy:nodeId="105713">
    <graphics y="-578.0190964186975" z="0.0" x="-432.5074222354815"/>
  </node>
  <node id="135139" label="MAN1A1" cy:nodeId="105716">
    <graphics y="-1138.66765598901" z="0.0" x="-399.9597842960284"/>
  </node>
  <node id="135281" label="CSGALNACT2" cy:nodeId="105715">
    <graphics y="-919.1524887526818" z="0.0" x="-401.753638055794"/>
  </node>
  <node id="135230" label="CHST11" cy:nodeId="105718">
    <graphics y="2101.974983171146" z="0.0" x="-1301.38952520179"/>
  </node>
  <node id="135250" label="CHSY1" cy:nodeId="105717">
    <graphics y="1186.9664992844275" z="0.0" x="1448.609399053581"/>
  </node>
  <node id="135218" label="DPM3" cy:nodeId="105722">
    <graphics y="448.1671218430213" z="0.0" x="2099.845727178581"/>
  </node>
  <node id="135251" label="MGAT1" cy:nodeId="105724">
    <graphics y="957.4435500656775" z="0.0" x="2011.1925289363935"/>
  </node>
  <node id="135253" label="BATF3" cy:nodeId="105723">
    <graphics y="1147.630439714115" z="0.0" x="1793.327416631706"/>
  </node>
  <node id="135249" label="BMI1" cy:nodeId="105726">
    <graphics y="-762.9739304030725" z="0.0" x="-481.7481143741534"/>
  </node>
  <node id="135248" label="ALG10B" cy:nodeId="105727">
    <graphics y="-910.9296799147912" z="0.0" x="-319.1654727725909"/>
  </node>
  <node id="135241" label="PIGN" cy:nodeId="105730">
    <graphics y="-905.5082626784631" z="0.0" x="-721.047095087044"/>
  </node>
  <node id="135085" label="POLR3GL" cy:nodeId="114948">
    <graphics y="16.973854020755653" z="0.0" x="2282.329125616081"/>
  </node>
  <node id="135280" label="SLC35E3" cy:nodeId="105732">
    <graphics y="-944.0911789382287" z="0.0" x="-528.2308109073565"/>
  </node>
  <node id="135098" label="GALNT13" cy:nodeId="114947">
    <graphics y="-648.1586685622522" z="0.0" x="1.4726912708356394"/>
  </node>
  <node id="135272" label="FAM20B" cy:nodeId="105731">
    <graphics y="-674.9327469313928" z="0.0" x="-373.1621768741534"/>
  </node>
  <node id="135243" label="ALG12" cy:nodeId="105734">
    <graphics y="2211.272560075443" z="0.0" x="-1532.185782220833"/>
  </node>
  <node id="135244" label="BRD1" cy:nodeId="105733">
    <graphics y="2201.974983171146" z="0.0" x="-1631.7526080875323"/>
  </node>
  <node id="135173" label="CTNS" cy:nodeId="114952">
    <graphics y="-1049.1031418288537" z="0.0" x="-1214.964819696419"/>
  </node>
  <node id="135260" label="PMM1" cy:nodeId="105735">
    <graphics y="-146.83251194604122" z="0.0" x="1790.222192022331"/>
  </node>
  <node id="135181" label="B4GALT1" cy:nodeId="107274">
    <graphics y="1240.41388697974" z="0.0" x="1272.335473272331"/>
  </node>
  <node id="135235" label="CASP8AP2" cy:nodeId="105738">
    <graphics y="-1054.4443893874475" z="0.0" x="-285.658911493294"/>
  </node>
  <node id="135167" label="HYAL2" cy:nodeId="105737">
    <graphics y="697.291084245365" z="0.0" x="1366.6080562801435"/>
  </node>
  <node id="135277" label="ASH2L" cy:nodeId="107273">
    <graphics y="-234.65691380150997" z="0.0" x="-797.0206668643877"/>
  </node>
  <node id="135242" label="BRD2" cy:nodeId="107276">
    <graphics y="-790.1330185378381" z="0.0" x="-525.8223636417315"/>
  </node>
  <node id="135231" label="CBFB" cy:nodeId="105739">
    <graphics y="2021.3952407395057" z="0.0" x="-1230.3142383365557"/>
  </node>
  <node id="135276" label="FUT10" cy:nodeId="107278">
    <graphics y="-629.8117447341272" z="0.0" x="-583.3755862979815"/>
  </node>
  <node id="135240" label="BRD3" cy:nodeId="107277">
    <graphics y="-989.6686935866662" z="0.0" x="-434.0787112979815"/>
  </node>
  <node id="135219" label="RFNG" cy:nodeId="105744">
    <graphics y="344.3390578781775" z="0.0" x="1866.0792476863935"/>
  </node>
  <node id="135138" label="B4GALT5" cy:nodeId="107279">
    <graphics y="-599.1291199172326" z="0.0" x="-111.72801854895806"/>
  </node>
  <node id="135089" label="MAN2A2" cy:nodeId="105748">
    <graphics y="-1216.07683567651" z="0.0" x="-1029.3033206729815"/>
  </node>
  <node id="135189" label="MGAT3" cy:nodeId="105750">
    <graphics y="8.462654069583778" z="0.0" x="454.92537805748725"/>
  </node>
  <node id="135199" label="ALG8" cy:nodeId="107286">
    <graphics y="278.538642839115" z="0.0" x="-1088.1150882511065"/>
  </node>
  <node id="135095" label="IDUA" cy:nodeId="105749">
    <graphics y="553.3422317063025" z="0.0" x="1923.3072750301435"/>
  </node>
  <node id="135201" label="EED" cy:nodeId="107285">
    <graphics y="445.0463943039588" z="0.0" x="-1178.292700555794"/>
  </node>
  <node id="135106" label="FUT2" cy:nodeId="107287">
    <graphics y="2201.974983171146" z="0.0" x="-1033.0521304874346"/>
  </node>
  <node id="135178" label="HYAL1" cy:nodeId="105751">
    <graphics y="983.45636744849" z="0.0" x="1349.8678219051435"/>
  </node>
  <node id="135102" label="ASAH1" cy:nodeId="107290">
    <graphics y="-442.72618488915646" z="0.0" x="-273.01737096595025"/>
  </node>
  <node id="135144" label="B3GAT3" cy:nodeId="105754">
    <graphics y="-634.0544510329553" z="0.0" x="-1831.3194339542315"/>
  </node>
  <node id="135064" label="GALK1" cy:nodeId="105753">
    <graphics y="582.768135026615" z="0.0" x="2055.6104976863935"/>
  </node>
  <node id="135185" label="ERCC3" cy:nodeId="107292">
    <graphics y="-1240.78435520776" z="0.0" x="-299.9348209171221"/>
  </node>
  <node id="135155" label="PAPSS1" cy:nodeId="107291">
    <graphics y="-406.38452152856075" z="0.0" x="-592.8541019229815"/>
  </node>
  <node id="135222" label="DPM2" cy:nodeId="105758">
    <graphics y="386.2829665695838" z="0.0" x="2040.264428350456"/>
  </node>
  <node id="135223" label="CDK9" cy:nodeId="105757">
    <graphics y="218.10596461645878" z="0.0" x="2023.2064449520185"/>
  </node>
  <node id="135220" label="MAN1B1" cy:nodeId="105760">
    <graphics y="57.66675563208378" z="0.0" x="2122.271996709831"/>
  </node>
  <node id="135166" label="FOSL2" cy:nodeId="107295">
    <graphics y="1392.5004348313025" z="0.0" x="1328.443871709831"/>
  </node>
  <node id="135221" label="PIGQ" cy:nodeId="105759">
    <graphics y="214.71521754614628" z="0.0" x="1893.7445308895185"/>
  </node>
  <node id="135163" label="FOXK1" cy:nodeId="107298">
    <graphics y="-830.5187607253381" z="0.0" x="-965.292700555794"/>
  </node>
  <node id="135045" label="POMT1" cy:nodeId="105761">
    <graphics y="22.045692399661903" z="0.0" x="2467.442406866081"/>
  </node>
  <node id="135268" label="GNE" cy:nodeId="107297">
    <graphics y="-870.142997785885" z="0.0" x="-588.9642093448565"/>
  </node>
  <node id="135188" label="MFNG" cy:nodeId="105766">
    <graphics y="846.5031203781775" z="0.0" x="1180.431420537956"/>
  </node>
  <node id="135233" label="A4GALT" cy:nodeId="105768">
    <graphics y="840.6298293625525" z="0.0" x="1398.613061162956"/>
  </node>
  <node id="135214" label="CHD2" cy:nodeId="105770">
    <graphics y="-769.7392197097131" z="0.0" x="-250.44620397376275"/>
  </node>
  <node id="135245" label="GNPDA1" cy:nodeId="107305">
    <graphics y="-851.5233993972131" z="0.0" x="-775.1519534854815"/>
  </node>
  <node id="135270" label="NDST2" cy:nodeId="105772">
    <graphics y="-854.2974167311975" z="0.0" x="-326.2169864444659"/>
  </node>
  <node id="135269" label="OGT" cy:nodeId="105771">
    <graphics y="-715.0978165114709" z="0.0" x="-303.4429996280596"/>
  </node>
  <node id="135213" label="CHD4" cy:nodeId="105773">
    <graphics y="-704.5171890700647" z="0.0" x="-782.0012576847002"/>
  </node>
  <node id="135264" label="GBA" cy:nodeId="107309">
    <graphics y="-771.0681992019006" z="0.0" x="-898.1134403018877"/>
  </node>
  <node id="135140" label="KAT2B" cy:nodeId="107312">
    <graphics y="-776.3489609206506" z="0.0" x="-406.8409183292315"/>
  </node>
  <node id="135111" label="MAN2B1" cy:nodeId="105777">
    <graphics y="2201.974983171146" z="0.0" x="-833.4853046207354"/>
  </node>
  <node id="135209" label="CPSF3L" cy:nodeId="105780">
    <graphics y="79.98450465552128" z="0.0" x="1492.6693355770185"/>
  </node>
  <node id="135259" label="B4GALT7" cy:nodeId="105782">
    <graphics y="235.17389674536503" z="0.0" x="1785.410180303581"/>
  </node>
  <node id="135208" label="B3GALT6" cy:nodeId="105781">
    <graphics y="-35.4654159987756" z="0.0" x="1160.8458492488935"/>
  </node>
  <node id="135131" label="LDB1" cy:nodeId="107320">
    <graphics y="-927.11980442651" z="0.0" x="-927.2436893253252"/>
  </node>
  <node id="135123" label="MBD3" cy:nodeId="107323">
    <graphics y="431.8537673508338" z="0.0" x="1674.191430303581"/>
  </node>
  <node id="135161" label="POFUT1" cy:nodeId="105792">
    <graphics y="-986.8481369460412" z="0.0" x="-578.1434085636065"/>
  </node>
  <node id="135157" label="COG7" cy:nodeId="105791">
    <graphics y="-11.637290998775597" z="0.0" x="-714.4316776065752"/>
  </node>
  <node id="135204" label="CTBP1" cy:nodeId="105793">
    <graphics y="297.77667994849" z="0.0" x="2050.0343258113935"/>
  </node>
  <node id="135048" label="PIGY" cy:nodeId="107332">
    <graphics y="2211.272560075443" z="0.0" x="-1731.7526080875323"/>
  </node>
  <node id="135092" label="PHF8" cy:nodeId="107334">
    <graphics y="-770.2946396315881" z="0.0" x="-638.899878290169"/>
  </node>
  <node id="135100" label="NRF1" cy:nodeId="107333">
    <graphics y="-295.93048863061153" z="0.0" x="412.994408819206"/>
  </node>
  <node id="135121" label="ALG3" cy:nodeId="105797">
    <graphics y="402.74933619849" z="0.0" x="1552.344018194206"/>
  </node>
  <node id="135275" label="KHK" cy:nodeId="105800">
    <graphics y="-61.94268040307247" z="0.0" x="-925.9158084659502"/>
  </node>
  <node id="135088" label="SLC35A2" cy:nodeId="107335">
    <graphics y="-1331.5313644851037" z="0.0" x="-989.0295779972002"/>
  </node>
  <node id="135182" label="FUT1" cy:nodeId="105802">
    <graphics y="905.154365495365" z="0.0" x="1341.043969366081"/>
  </node>
  <node id="135212" label="ST3GAL2" cy:nodeId="105806">
    <graphics y="-572.7870712722131" z="0.0" x="-1074.4632327823565"/>
  </node>
  <node id="135229" label="CSGALNACT1" cy:nodeId="105805">
    <graphics y="1940.8175735031775" z="0.0" x="-1159.236662652962"/>
  </node>
  <node id="135054" label="B3GALT2" cy:nodeId="105808">
    <graphics y="1940.8175735031775" z="0.0" x="-1643.5423877506182"/>
  </node>
  <node id="135062" label="SMARCA4" cy:nodeId="107343">
    <graphics y="-889.246513410885" z="0.0" x="-1103.7420413761065"/>
  </node>
  <node id="135052" label="SP2" cy:nodeId="107346">
    <graphics y="-899.0617905104943" z="0.0" x="-649.7710330753252"/>
  </node>
  <node id="135044" label="SVIL" cy:nodeId="107349">
    <graphics y="-1036.2488327468225" z="0.0" x="-379.4517886905596"/>
  </node>
  <node id="135198" label="EGLN2" cy:nodeId="105813">
    <graphics y="856.9005813156775" z="0.0" x="2520.704125616081"/>
  </node>
  <node id="135043" label="TAF3" cy:nodeId="107351">
    <graphics y="-690.565864607174" z="0.0" x="-865.3448856143877"/>
  </node>
  <node id="135175" label="ST6GALNAC3" cy:nodeId="105815">
    <graphics y="762.026924089115" z="0.0" x="1061.154076787956"/>
  </node>
  <node id="135037" label="TERF2" cy:nodeId="107353">
    <graphics y="-518.177135511715" z="0.0" x="-702.310522821419"/>
  </node>
  <node id="135152" label="SLC35E1" cy:nodeId="106844">
    <graphics y="-949.3501205886193" z="0.0" x="-815.6348026065752"/>
  </node>
  <node id="135234" label="CBFA2T3" cy:nodeId="106845">
    <graphics y="743.561103776615" z="0.0" x="1243.412621709831"/>
  </node>
  <node id="135238" label="COG6" cy:nodeId="105824">
    <graphics y="-1034.312431379635" z="0.0" x="-636.6498172550127"/>
  </node>
  <node id="135228" label="CBX6" cy:nodeId="106847">
    <graphics y="-1294.8475265944787" z="0.0" x="-431.513891962044"/>
  </node>
  <node id="135271" label="COG3" cy:nodeId="105823">
    <graphics y="-938.9338913405725" z="0.0" x="-187.72765233802056"/>
  </node>
  <node id="135195" label="ELK3" cy:nodeId="105826">
    <graphics y="-854.2810898269006" z="0.0" x="-856.1694705753252"/>
  </node>
  <node id="135196" label="ELF2" cy:nodeId="105825">
    <graphics y="-964.1465378249475" z="0.0" x="109.45824548912788"/>
  </node>
  <node id="135210" label="CLOCK" cy:nodeId="106849">
    <graphics y="-617.8769455397912" z="0.0" x="-817.5023563175127"/>
  </node>
  <node id="135194" label="ELL2" cy:nodeId="106852">
    <graphics y="1950.1151504074744" z="0.0" x="-760.1030109195635"/>
  </node>
  <node id="135192" label="EP400" cy:nodeId="105829">
    <graphics y="-544.3670731032678" z="0.0" x="-334.5398624210284"/>
  </node>
  <node id="135184" label="ERG" cy:nodeId="105832">
    <graphics y="1041.55939479224" z="0.0" x="1271.496117803581"/>
  </node>
  <node id="135180" label="ST6GAL1" cy:nodeId="106855">
    <graphics y="1119.5829543625525" z="0.0" x="1236.0003902645185"/>
  </node>
  <node id="135040" label="ST3GAL5" cy:nodeId="106857">
    <graphics y="2201.974983171146" z="0.0" x="-1432.185782220833"/>
  </node>
  <node id="135183" label="CHSY3" cy:nodeId="105833">
    <graphics y="1006.719795182865" z="0.0" x="1080.733910772331"/>
  </node>
  <node id="135160" label="GALNT7" cy:nodeId="106859">
    <graphics y="-1069.6948166335412" z="0.0" x="-12.946282175056695"/>
  </node>
  <node id="135171" label="FEV" cy:nodeId="120174">
    <graphics y="2021.3952407395057" z="0.0" x="-1472.4671008853838"/>
  </node>
  <node id="135082" label="PROX1" cy:nodeId="120176">
    <graphics y="-694.3672867263147" z="0.0" x="-992.003638055794"/>
  </node>
  <node id="135109" label="MTA3" cy:nodeId="120175">
    <graphics y="-1221.796318098385" z="0.0" x="-20.751368310920952"/>
  </node>
  <node id="135176" label="ETS1" cy:nodeId="105839">
    <graphics y="983.013252214115" z="0.0" x="1183.5721676082685"/>
  </node>
  <node id="135067" label="FUT9" cy:nodeId="120178">
    <graphics y="-1250.6387253249475" z="0.0" x="94.86082575035834"/>
  </node>
  <node id="135068" label="SF1" cy:nodeId="120177">
    <graphics y="-1078.3713913405725" z="0.0" x="-162.33142736243462"/>
  </node>
  <node id="135174" label="EZH1" cy:nodeId="105846">
    <graphics y="-1013.244072004635" z="0.0" x="-928.9114139347002"/>
  </node>
  <node id="135073" label="GALC" cy:nodeId="106869">
    <graphics y="-478.7982626403161" z="0.0" x="-823.9733035831377"/>
  </node>
  <node id="135246" label="SLC35B4" cy:nodeId="105845">
    <graphics y="-496.1853580916711" z="0.0" x="-547.9432742862627"/>
  </node>
  <node id="135168" label="FLI1" cy:nodeId="105848">
    <graphics y="977.8473586594275" z="0.0" x="1276.7174312801435"/>
  </node>
  <node id="135124" label="PIGH" cy:nodeId="105852">
    <graphics y="1940.8175735031775" z="0.0" x="-1059.236662652962"/>
  </node>
  <node id="135112" label="MEIS3" cy:nodeId="106878">
    <graphics y="2211.272560075443" z="0.0" x="-733.9184787540362"/>
  </node>
  <node id="135084" label="POU2F2" cy:nodeId="106880">
    <graphics y="-1507.9475632155725" z="0.0" x="138.57959863854194"/>
  </node>
  <node id="135076" label="GFPT1" cy:nodeId="106882">
    <graphics y="-1247.0253830397912" z="0.0" x="-525.7068851261065"/>
  </node>
  <node id="135041" label="TBX3" cy:nodeId="116610">
    <graphics y="2211.272560075443" z="0.0" x="-1332.6189563541338"/>
  </node>
  <node id="135252" label="HK3" cy:nodeId="105859">
    <graphics y="1259.392646745365" z="0.0" x="1880.2970211238935"/>
  </node>
  <node id="135159" label="GATA6" cy:nodeId="105862">
    <graphics y="1355.690498307865" z="0.0" x="1148.235375616081"/>
  </node>
  <node id="135065" label="SIRT6" cy:nodeId="106885">
    <graphics y="387.64533229224" z="0.0" x="1952.0775387020185"/>
  </node>
  <node id="135162" label="GABPA" cy:nodeId="105861">
    <graphics y="-979.3509750808068" z="0.0" x="-263.592993524544"/>
  </node>
  <node id="135035" label="THAP11" cy:nodeId="106890">
    <graphics y="-112.00316624291622" z="0.0" x="-1026.905737665169"/>
  </node>
  <node id="135158" label="GLYR1" cy:nodeId="105866">
    <graphics y="-229.63794712670528" z="0.0" x="-651.2332523136065"/>
  </node>
  <node id="135034" label="COG4" cy:nodeId="106892">
    <graphics y="6.2526931320837775" z="0.0" x="-1174.100561883919"/>
  </node>
  <node id="135136" label="COG8" cy:nodeId="106891">
    <graphics y="-381.44489292748653" z="0.0" x="-792.7904422550127"/>
  </node>
  <node id="135156" label="ALG1" cy:nodeId="105867">
    <graphics y="16.746223405521278" z="0.0" x="-588.003393915169"/>
  </node>
  <node id="135215" label="STT3A" cy:nodeId="106893">
    <graphics y="-1273.4794846022912" z="0.0" x="-736.3076541690752"/>
  </node>
  <node id="135154" label="GTF2I" cy:nodeId="105871">
    <graphics y="-1107.5012741530725" z="0.0" x="-653.0765140323565"/>
  </node>
  <node id="135265" label="PIGO" cy:nodeId="105874">
    <graphics y="-782.7511826003381" z="0.0" x="-794.066870477669"/>
  </node>
  <node id="135147" label="HECTD1" cy:nodeId="105875">
    <graphics y="-840.8173752272912" z="0.0" x="-206.15807225989556"/>
  </node>
  <node id="135145" label="DPAGT1" cy:nodeId="105878">
    <graphics y="-681.3959732497522" z="0.0" x="-1469.981665399544"/>
  </node>
  <node id="135146" label="HINFP" cy:nodeId="105877">
    <graphics y="-651.3422623122522" z="0.0" x="-1688.4007327823565"/>
  </node>
  <node id="135257" label="TSTA3" cy:nodeId="105880">
    <graphics y="1940.8175735031775" z="0.0" x="-460.5361850528643"/>
  </node>
  <node id="135143" label="HSF1" cy:nodeId="105879">
    <graphics y="160.21851344458378" z="0.0" x="1963.0790035457685"/>
  </node>
  <node id="135086" label="GM2A" cy:nodeId="105883">
    <graphics y="-1303.5043869460412" z="0.0" x="-886.8332889347002"/>
  </node>
  <node id="135142" label="JMJD1C" cy:nodeId="105892">
    <graphics y="-813.3720627272912" z="0.0" x="-450.24576452063775"/>
  </node>
  <node id="135151" label="MGAT5" cy:nodeId="105893">
    <graphics y="-1199.73601536401" z="0.0" x="-810.2583377628252"/>
  </node>
  <node id="135137" label="KAT5" cy:nodeId="105900">
    <graphics y="31.923744157474403" z="0.0" x="-962.8306644229815"/>
  </node>
  <node id="135141" label="JUND" cy:nodeId="105899">
    <graphics y="384.5173415695838" z="0.0" x="2274.368432256706"/>
  </node>
  <node id="135135" label="KDM3A" cy:nodeId="105903">
    <graphics y="-296.1742020095178" z="0.0" x="44.51343652916694"/>
  </node>
  <node id="135150" label="GNS" cy:nodeId="105905">
    <graphics y="-1506.2725143874475" z="0.0" x="-766.7347781925127"/>
  </node>
  <node id="135066" label="B3GALNT2" cy:nodeId="105908">
    <graphics y="-1143.8889084304162" z="0.0" x="119.33251306725288"/>
  </node>
  <node id="135129" label="LMO2" cy:nodeId="105909">
    <graphics y="799.7919387375525" z="0.0" x="1319.221459600456"/>
  </node>
  <node id="135128" label="LYL1" cy:nodeId="105911">
    <graphics y="693.26984401099" z="0.0" x="2172.373559209831"/>
  </node>
  <node id="135125" label="MAX" cy:nodeId="105915">
    <graphics y="1950.1151504074744" z="0.0" x="-959.6698367862627"/>
  </node>
  <node id="135061" label="MGAT4B" cy:nodeId="105918">
    <graphics y="-903.2619247878381" z="0.0" x="-1337.411841180794"/>
  </node>
  <node id="135122" label="B4GALT2" cy:nodeId="105917">
    <graphics y="538.7580031906775" z="0.0" x="1636.0494625301435"/>
  </node>
  <node id="135119" label="IDS" cy:nodeId="105922">
    <graphics y="-190.99938206322872" z="0.0" x="-492.7899234561846"/>
  </node>
  <node id="135279" label="ARID3A" cy:nodeId="107970">
    <graphics y="1950.1151504074744" z="0.0" x="-161.40253331946587"/>
  </node>
  <node id="135120" label="MECP2" cy:nodeId="105921">
    <graphics y="-500.9686470473596" z="0.0" x="-482.0731876163409"/>
  </node>
  <node id="135187" label="NDST1" cy:nodeId="105923">
    <graphics y="884.9213332688025" z="0.0" x="1097.503442022331"/>
  </node>
  <node id="135113" label="MEF2C" cy:nodeId="105926">
    <graphics y="855.08429713599" z="0.0" x="1249.1200191707685"/>
  </node>
  <node id="135149" label="GALNT11" cy:nodeId="107974">
    <graphics y="-1412.6738815749475" z="0.0" x="-707.225561883919"/>
  </node>
  <node id="135116" label="MEF2A" cy:nodeId="105925">
    <graphics y="-962.3238754714318" z="0.0" x="-628.4194705753252"/>
  </node>
  <node id="135254" label="AUTS2" cy:nodeId="107973">
    <graphics y="-319.8689804519006" z="0.0" x="-222.2746799259112"/>
  </node>
  <node id="135237" label="BRD7" cy:nodeId="107977">
    <graphics y="-1071.953544660885" z="0.0" x="-1034.500220087044"/>
  </node>
  <node id="135110" label="MSX1" cy:nodeId="105932">
    <graphics y="882.2040481125525" z="0.0" x="1581.078149053581"/>
  </node>
  <node id="135107" label="MYBL1" cy:nodeId="105934">
    <graphics y="2211.272560075443" z="0.0" x="-933.4853046207354"/>
  </node>
  <node id="135079" label="B3GNT8" cy:nodeId="107983">
    <graphics y="95.46540065161503" z="0.0" x="2587.245385381706"/>
  </node>
  <node id="135207" label="SLC35C2" cy:nodeId="107986">
    <graphics y="-44.38771824486935" z="0.0" x="1451.782738897331"/>
  </node>
  <node id="135202" label="DICER1" cy:nodeId="107985">
    <graphics y="-324.0483780349084" z="0.0" x="-514.8973148136065"/>
  </node>
  <node id="135105" label="MZF1" cy:nodeId="105942">
    <graphics y="480.1971511398963" z="0.0" x="2194.481713506706"/>
  </node>
  <node id="135226" label="B4GALNT1" cy:nodeId="107990">
    <graphics y="2201.974983171146" z="0.0" x="-633.9184787540362"/>
  </node>
  <node id="135104" label="NPAT" cy:nodeId="105948">
    <graphics y="-733.3950424636193" z="0.0" x="-1111.486792352669"/>
  </node>
  <node id="135077" label="SLC35D1" cy:nodeId="105950">
    <graphics y="-1455.1431198561975" z="0.0" x="-466.853735712044"/>
  </node>
  <node id="135103" label="NR2C2" cy:nodeId="105949">
    <graphics y="-654.589286848385" z="0.0" x="-499.4466007022784"/>
  </node>
  <node id="135134" label="KDM4C" cy:nodeId="107997">
    <graphics y="-640.8755112136193" z="0.0" x="-238.570044305794"/>
  </node>
  <node id="135117" label="PIGM" cy:nodeId="105954">
    <graphics y="-189.4803085769006" z="0.0" x="-358.9886539249346"/>
  </node>
  <node id="135099" label="PBX1" cy:nodeId="105953">
    <graphics y="-785.8190536940881" z="0.0" x="-336.7139957218096"/>
  </node>
  <node id="135224" label="SLC35A1" cy:nodeId="108001">
    <graphics y="2211.272560075443" z="0.0" x="-1133.0521304874346"/>
  </node>
  <node id="135094" label="PHF20" cy:nodeId="105956">
    <graphics y="-926.6733627761193" z="0.0" x="-586.0710819034502"/>
  </node>
  <node id="135096" label="PCGF1" cy:nodeId="105955">
    <graphics y="527.7699660813025" z="0.0" x="1824.444848272331"/>
  </node>
  <node id="135093" label="PHF6" cy:nodeId="105957">
    <graphics y="-486.0598478759118" z="0.0" x="-125.26172521399712"/>
  </node>
  <node id="135090" label="POLR3A" cy:nodeId="105960">
    <graphics y="-1048.9075241530725" z="0.0" x="-720.358862665169"/>
  </node>
  <node id="135091" label="POLR2B" cy:nodeId="105959">
    <graphics y="-843.3289719069787" z="0.0" x="-655.0926883487627"/>
  </node>
</graph>
