# Supplementary material for: A systems-based framework to computationally describe putative transcription factors and signaling pathways regulating glycan biosynthesis
Source: publisher site journal article supplement (doi:10.3762/bjoc.17.119), 2021-07-22
Supplement: Additional file 2 [file 1860-5397-17-119-S2.cys › CytoscapeSession-2021_03_21-12_01/views/120744-149102-PRAD.xgmml]

<?xml version="1.0" encoding="UTF-8" standalone="yes"?>
<graph id="149102" label="PRAD" cy:view="1" cy:networkId="120744" cy:visualStyle="default" cy:rendererId="org.cytoscape.ding" cy:documentVersion="3.0" xmlns:dc="http://purl.org/dc/elements/1.1/" xmlns:xlink="http://www.w3.org/1999/xlink" xmlns:rdf="http://www.w3.org/1999/02/22-rdf-syntax-ns#" xmlns:cy="http://www.cytoscape.org" xmlns="http://www.cs.rpi.edu/XGMML">
  <graphics>
    <att name="NETWORK_NODE_SELECTION" value="true" type="string" cy:type="String"/>
    <att name="NETWORK_CENTER_X_LOCATION" value="-408.191162109375" type="string" cy:type="String"/>
    <att name="NETWORK_HEIGHT" value="510.0" type="string" cy:type="String"/>
    <att name="NETWORK_TITLE" value="PRAD" type="string" cy:type="String"/>
    <att name="NETWORK_EDGE_SELECTION" value="true" type="string" cy:type="String"/>
    <att name="NETWORK_CENTER_Y_LOCATION" value="20.17236328125" type="string" cy:type="String"/>
    <att name="NETWORK_WIDTH" value="1312.0" type="string" cy:type="String"/>
    <att name="NETWORK_DEPTH" value="0.0" type="string" cy:type="String"/>
    <att name="NETWORK_SCALE_FACTOR" value="0.11217669990500617" type="string" cy:type="String"/>
    <att name="NETWORK_ANNOTATION_SELECTION" value="false" type="string" cy:type="String"/>
    <att name="NETWORK_CENTER_Z_LOCATION" value="0.0" type="string" cy:type="String"/>
  </graphics>
  <node id="149169" label="RBL2" cy:nodeId="105968">
    <graphics y="173.01147433666347" z="0.0" x="744.5598056744225"/>
  </node>
  <node id="149170" label="RBBP5" cy:nodeId="105967">
    <graphics y="-12.428802762945907" z="0.0" x="746.2754428814537"/>
  </node>
  <node id="149165" label="REST" cy:nodeId="105970">
    <graphics y="-520.2455752238834" z="0.0" x="618.3149021099694"/>
  </node>
  <node id="149168" label="RCOR1" cy:nodeId="105969">
    <graphics y="77.53327914623378" z="0.0" x="656.1140048931725"/>
  </node>
  <node id="149187" label="NR2F2" cy:nodeId="108017">
    <graphics y="327.60473605541347" z="0.0" x="178.65311316953967"/>
  </node>
  <node id="149173" label="PRDM4" cy:nodeId="108021">
    <graphics y="448.8544308796322" z="0.0" x="503.00655250059435"/>
  </node>
  <node id="149272" label="COG2" cy:nodeId="105973">
    <graphics y="557.5631711140072" z="0.0" x="1100.9320590923912"/>
  </node>
  <node id="149167" label="RELA" cy:nodeId="108024">
    <graphics y="1906.8954465046322" z="0.0" x="-1764.0711986590736"/>
  </node>
  <node id="149293" label="FPGT" cy:nodeId="105976">
    <graphics y="-124.2711050853336" z="0.0" x="926.396353525985"/>
  </node>
  <node id="149164" label="RNF2" cy:nodeId="105975">
    <graphics y="78.70182773021816" z="0.0" x="905.7079379986412"/>
  </node>
  <node id="149364" label="CREB3L2" cy:nodeId="111095">
    <graphics y="-359.92576626392247" z="0.0" x="1081.806021494735"/>
  </node>
  <node id="149309" label="ETS2" cy:nodeId="111098">
    <graphics y="-11.124405179938094" z="0.0" x="-157.72333641542127"/>
  </node>
  <node id="149163" label="RORA" cy:nodeId="105977">
    <graphics y="715.309692110101" z="0.0" x="286.5165470074303"/>
  </node>
  <node id="149197" label="PIGA" cy:nodeId="108027">
    <graphics y="819.4819943561947" z="0.0" x="1019.5668857525475"/>
  </node>
  <node id="149342" label="SULF2" cy:nodeId="105979">
    <graphics y="419.7708127155697" z="0.0" x="-208.23670311464002"/>
  </node>
  <node id="149132" label="TBP" cy:nodeId="108030">
    <graphics y="-645.149536405524" z="0.0" x="484.9505832623131"/>
  </node>
  <node id="149140" label="STAT5B" cy:nodeId="108029">
    <graphics y="384.4866330280697" z="0.0" x="-50.61066551698377"/>
  </node>
  <node id="149162" label="RUNX2" cy:nodeId="105981">
    <graphics y="271.35067721752284" z="0.0" x="-238.90589256776502"/>
  </node>
  <node id="149265" label="HES1" cy:nodeId="111101">
    <graphics y="-618.4982607707584" z="0.0" x="213.13548926817248"/>
  </node>
  <node id="149157" label="SIN3A" cy:nodeId="105984">
    <graphics y="-375.94517544360997" z="0.0" x="845.1184604595787"/>
  </node>
  <node id="149443" label="B3GNT9" cy:nodeId="108032">
    <graphics y="513.1550900593197" z="0.0" x="-369.6090786029213"/>
  </node>
  <node id="149130" label="TCF21" cy:nodeId="108031">
    <graphics y="713.0646359577572" z="0.0" x="-213.37635155214002"/>
  </node>
  <node id="149111" label="B3GALT5" cy:nodeId="108034">
    <graphics y="734.8969113483822" z="0.0" x="429.93655280577013"/>
  </node>
  <node id="149155" label="SIX5" cy:nodeId="105986">
    <graphics y="-1910.9859011516178" z="0.0" x="-1585.98474998964"/>
  </node>
  <node id="149312" label="HS3ST3A1" cy:nodeId="108033">
    <graphics y="659.7940060749447" z="0.0" x="-181.20948143495252"/>
  </node>
  <node id="149461" label="UGCG" cy:nodeId="105985">
    <graphics y="197.13915988353847" z="0.0" x="567.041373057235"/>
  </node>
  <node id="149122" label="TFDP1" cy:nodeId="108036">
    <graphics y="-386.3448946818912" z="0.0" x="572.3802249859459"/>
  </node>
  <node id="149149" label="SMARCC2" cy:nodeId="105988">
    <graphics y="-335.43904141040684" z="0.0" x="668.2366550396569"/>
  </node>
  <node id="149448" label="ARNT2" cy:nodeId="108548">
    <graphics y="-136.67516735645177" z="0.0" x="1036.82970313536"/>
  </node>
  <node id="149154" label="SMAD4" cy:nodeId="105987">
    <graphics y="391.0932004108822" z="0.0" x="743.952505869735"/>
  </node>
  <node id="149436" label="ATF4" cy:nodeId="108550">
    <graphics y="-1795.8678591594303" z="0.0" x="-1625.61170311464"/>
  </node>
  <node id="149127" label="SLC35E4" cy:nodeId="111112">
    <graphics y="228.64410373119472" z="0.0" x="-610.2053920794838"/>
  </node>
  <node id="149410" label="UGDH" cy:nodeId="108551">
    <graphics y="-345.80537441821934" z="0.0" x="346.49378852354357"/>
  </node>
  <node id="149143" label="SRF" cy:nodeId="105996">
    <graphics y="638.216674531976" z="0.0" x="-445.3880092669838"/>
  </node>
  <node id="149145" label="SREBF2" cy:nodeId="105995">
    <graphics y="-56.88726833911778" z="0.0" x="920.8408115337975"/>
  </node>
  <node id="149446" label="GANAB" cy:nodeId="105998">
    <graphics y="-144.65031627269627" z="0.0" x="811.2630222271569"/>
  </node>
  <node id="149311" label="GALNT6" cy:nodeId="108561">
    <graphics y="346.81457492260097" z="0.0" x="-377.4737026263588"/>
  </node>
  <node id="149135" label="SUMO2" cy:nodeId="106004">
    <graphics y="2068.052856172601" z="0.0" x="-2006.2240612079017"/>
  </node>
  <node id="149378" label="CEBPZ" cy:nodeId="108564">
    <graphics y="-619.6916811809147" z="0.0" x="683.4027622173912"/>
  </node>
  <node id="149381" label="CEBPD" cy:nodeId="108563">
    <graphics y="-480.2066347941959" z="0.0" x="-1022.706673817765"/>
  </node>
  <node id="149133" label="TAF1" cy:nodeId="106006">
    <graphics y="-59.891350065192" z="0.0" x="526.6680057476647"/>
  </node>
  <node id="149408" label="COG1" cy:nodeId="106005">
    <graphics y="-400.05149868579747" z="0.0" x="405.351504130233"/>
  </node>
  <node id="149129" label="TCF7" cy:nodeId="106008">
    <graphics y="426.28186007885097" z="0.0" x="-116.52909203065565"/>
  </node>
  <node id="149361" label="CSNK2A1" cy:nodeId="108568">
    <graphics y="-270.7589800700748" z="0.0" x="629.6757877300865"/>
  </node>
  <node id="149131" label="TCF12" cy:nodeId="106007">
    <graphics y="-80.36576870532872" z="0.0" x="413.02941398130724"/>
  </node>
  <node id="149126" label="TCF7L2" cy:nodeId="106010">
    <graphics y="587.305541719476" z="0.0" x="492.76348762022326"/>
  </node>
  <node id="149128" label="TCF7L1" cy:nodeId="106009">
    <graphics y="436.9335324421322" z="0.0" x="-350.531869130265"/>
  </node>
  <node id="149348" label="DR1" cy:nodeId="108571">
    <graphics y="-163.07949284168126" z="0.0" x="1137.2919834087975"/>
  </node>
  <node id="149418" label="GALNT1" cy:nodeId="106014">
    <graphics y="349.67013522533534" z="0.0" x="899.2780673931725"/>
  </node>
  <node id="149124" label="TET2" cy:nodeId="106016">
    <graphics y="198.29476901439784" z="0.0" x="689.38683204161"/>
  </node>
  <node id="149125" label="TERF1" cy:nodeId="106015">
    <graphics y="240.48901339916347" z="0.0" x="609.2982852886803"/>
  </node>
  <node id="149117" label="TRIM28" cy:nodeId="106018">
    <graphics y="-1553.7695925578678" z="0.0" x="-1453.3532802630775"/>
  </node>
  <node id="149282" label="PIGL" cy:nodeId="108578">
    <graphics y="-1333.8185427531803" z="0.0" x="-465.7038662005775"/>
  </node>
  <node id="149119" label="TP63" cy:nodeId="106017">
    <graphics y="417.9348752155697" z="0.0" x="-480.7520229388588"/>
  </node>
  <node id="149334" label="EXT1" cy:nodeId="108580">
    <graphics y="579.2987668171322" z="0.0" x="-68.8520290423744"/>
  </node>
  <node id="149115" label="USF2" cy:nodeId="106022">
    <graphics y="-1694.5978396281803" z="0.0" x="-1501.8833095599525"/>
  </node>
  <node id="149113" label="WDR5" cy:nodeId="106024">
    <graphics y="-1498.3932497844303" z="0.0" x="-819.48279686464"/>
  </node>
  <node id="149114" label="VEZF1" cy:nodeId="106023">
    <graphics y="231.25118991283534" z="0.0" x="517.8125293682701"/>
  </node>
  <node id="149109" label="YAP1" cy:nodeId="106026">
    <graphics y="209.17330905346034" z="0.0" x="161.0935275982506"/>
  </node>
  <node id="149110" label="XRN2" cy:nodeId="106025">
    <graphics y="-93.17142132373692" z="0.0" x="689.3089206646569"/>
  </node>
  <node id="149108" label="YY1" cy:nodeId="106028">
    <graphics y="25.014938081780656" z="0.0" x="1050.0754917095787"/>
  </node>
  <node id="149254" label="GALNT5" cy:nodeId="106027">
    <graphics y="125.35766574291347" z="0.0" x="-222.83527489198377"/>
  </node>
  <node id="149366" label="B3GALT4" cy:nodeId="106030">
    <graphics y="2161.591003145257" z="0.0" x="-2106.2240612079017"/>
  </node>
  <node id="149393" label="GAL3ST3" cy:nodeId="108590">
    <graphics y="571.904174531976" z="0.0" x="-497.8361293841713"/>
  </node>
  <node id="149106" label="ZBTB17" cy:nodeId="106029">
    <graphics y="-1707.1698611125553" z="0.0" x="-1787.413705067765"/>
  </node>
  <node id="149267" label="HDAC2" cy:nodeId="108592">
    <graphics y="-480.7028506145084" z="0.0" x="499.45593909727404"/>
  </node>
  <node id="149104" label="ZBTB33" cy:nodeId="106031">
    <graphics y="-40.86216000171544" z="0.0" x="987.0005405377037"/>
  </node>
  <node id="149271" label="HBP1" cy:nodeId="108591">
    <graphics y="-106.30065563770177" z="0.0" x="488.89845160948107"/>
  </node>
  <node id="149214" label="SULT1A3" cy:nodeId="108594">
    <graphics y="-2190.063049589118" z="0.0" x="-1957.462044911515"/>
  </node>
  <node id="149261" label="HIRA" cy:nodeId="108595">
    <graphics y="49.97619601635097" z="0.0" x="601.097525400985"/>
  </node>
  <node id="149456" label="ALKBH3" cy:nodeId="113210">
    <graphics y="-1921.8915408000553" z="0.0" x="-2046.43299217714"/>
  </node>
  <node id="149259" label="HOXA13" cy:nodeId="118332">
    <graphics y="-622.8952029094303" z="0.0" x="790.0667331646569"/>
  </node>
  <node id="149202" label="NCOR1" cy:nodeId="108603">
    <graphics y="707.3593747272885" z="0.0" x="853.6992710064537"/>
  </node>
  <node id="149245" label="ISL1" cy:nodeId="118334">
    <graphics y="316.34899875072597" z="0.0" x="-159.83039207948377"/>
  </node>
  <node id="149211" label="GALNT9" cy:nodeId="108605">
    <graphics y="639.9381711140072" z="0.0" x="-566.1059047747963"/>
  </node>
  <node id="149159" label="SATB1" cy:nodeId="108614">
    <graphics y="-17.455963407477157" z="0.0" x="474.6744602154381"/>
  </node>
  <node id="149158" label="SFMBT1" cy:nodeId="108615">
    <graphics y="-99.19140652271153" z="0.0" x="279.59515265928576"/>
  </node>
  <node id="149224" label="LEO1" cy:nodeId="113227">
    <graphics y="123.67242404369472" z="0.0" x="1286.806509775985"/>
  </node>
  <node id="149147" label="SOX9" cy:nodeId="108621">
    <graphics y="987.3366086140072" z="0.0" x="767.8562229107506"/>
  </node>
  <node id="149116" label="TRRAP" cy:nodeId="108628">
    <graphics y="-294.5370791301334" z="0.0" x="781.2574985455162"/>
  </node>
  <node id="149112" label="WWTR1" cy:nodeId="108630">
    <graphics y="360.28378268627284" z="0.0" x="355.2494419048912"/>
  </node>
  <node id="149314" label="ESR1" cy:nodeId="112219">
    <graphics y="496.60852023510097" z="0.0" x="-201.31806297792127"/>
  </node>
  <node id="149291" label="B3GNT3" cy:nodeId="112223">
    <graphics y="146.0826718464291" z="0.0" x="-725.550912099015"/>
  </node>
  <node id="149394" label="ST6GALNAC2" cy:nodeId="112225">
    <graphics y="483.58691378978847" z="0.0" x="-425.4956752826088"/>
  </node>
  <node id="149315" label="ARSD" cy:nodeId="112230">
    <graphics y="1478.5053097858822" z="0.0" x="356.8783405254967"/>
  </node>
  <node id="149137" label="SUMO1" cy:nodeId="112231">
    <graphics y="1906.8954465046322" z="0.0" x="-1864.0711986590736"/>
  </node>
  <node id="149292" label="GATA3" cy:nodeId="109677">
    <graphics y="371.18908664135097" z="0.0" x="-436.5883876849525"/>
  </node>
  <node id="149365" label="NAGLU" cy:nodeId="109680">
    <graphics y="2230.407653535882" z="0.0" x="-2284.0253994037025"/>
  </node>
  <node id="149194" label="NR1H2" cy:nodeId="109685">
    <graphics y="-1629.5513308391178" z="0.0" x="-1662.401986317765"/>
  </node>
  <node id="149144" label="PIGG" cy:nodeId="109689">
    <graphics y="-346.5809481486881" z="0.0" x="1268.003287119735"/>
  </node>
  <node id="149422" label="BCOR" cy:nodeId="110788">
    <graphics y="-420.32632473560216" z="0.0" x="656.0406711529381"/>
  </node>
  <node id="149310" label="ESRRA" cy:nodeId="110794">
    <graphics y="-2053.453674589118" z="0.0" x="-1892.39832420839"/>
  </node>
  <node id="149352" label="DDIT3" cy:nodeId="110793">
    <graphics y="-1693.2387087688053" z="0.0" x="-2155.595345692765"/>
  </node>
  <node id="149208" label="MLLT3" cy:nodeId="110800">
    <graphics y="15.005431856194718" z="0.0" x="1315.3920200298912"/>
  </node>
  <node id="149468" label="AFF4" cy:nodeId="105686">
    <graphics y="142.12322970775722" z="0.0" x="679.6629856060631"/>
  </node>
  <node id="149466" label="STT3B" cy:nodeId="105688">
    <graphics y="24.11779757885097" z="0.0" x="688.4850681255944"/>
  </node>
  <node id="149192" label="NR1H3" cy:nodeId="110807">
    <graphics y="1019.4133908405697" z="0.0" x="-680.43445702089"/>
  </node>
  <node id="149467" label="MAN1A2" cy:nodeId="105687">
    <graphics y="22.093780244866593" z="0.0" x="637.0040958355553"/>
  </node>
  <node id="149464" label="FUT11" cy:nodeId="105690">
    <graphics y="-13.586548124274032" z="0.0" x="683.3482883404381"/>
  </node>
  <node id="149465" label="NEU3" cy:nodeId="105689">
    <graphics y="115.00814792064784" z="0.0" x="719.4121616314537"/>
  </node>
  <node id="149462" label="COG5" cy:nodeId="105692">
    <graphics y="240.74139377025722" z="0.0" x="853.066763682235"/>
  </node>
  <node id="149463" label="ACER2" cy:nodeId="105691">
    <graphics y="257.66476413158534" z="0.0" x="768.7543552349694"/>
  </node>
  <node id="149121" label="TOP1" cy:nodeId="110814">
    <graphics y="-561.0270998820865" z="0.0" x="1205.6183994244225"/>
  </node>
  <node id="149452" label="MAN2A1" cy:nodeId="105694">
    <graphics y="118.6938779011166" z="0.0" x="545.9490268658287"/>
  </node>
  <node id="149453" label="AR" cy:nodeId="105693">
    <graphics y="261.90869113353847" z="0.0" x="669.4072177837975"/>
  </node>
  <node id="149441" label="SLC35F5" cy:nodeId="105696">
    <graphics y="178.67291232494472" z="0.0" x="997.36095313536"/>
  </node>
  <node id="149417" label="SLC35A3" cy:nodeId="105695">
    <graphics y="110.19197055248378" z="0.0" x="837.3252780865319"/>
  </node>
  <node id="149460" label="GALNT10" cy:nodeId="105697">
    <graphics y="174.03256198314784" z="0.0" x="443.8502948711998"/>
  </node>
  <node id="149449" label="RTF1" cy:nodeId="105700">
    <graphics y="-130.24417522998692" z="0.0" x="713.933951182235"/>
  </node>
  <node id="149450" label="ARID2" cy:nodeId="105699">
    <graphics y="-515.9126894816959" z="0.0" x="865.2018955181725"/>
  </node>
  <node id="149234" label="SLC35A5" cy:nodeId="105702">
    <graphics y="274.59921237377284" z="0.0" x="903.4220493267662"/>
  </node>
  <node id="149442" label="ATF1" cy:nodeId="105701">
    <graphics y="213.90295382885097" z="0.0" x="936.0168369244225"/>
  </node>
  <node id="149439" label="ATF2" cy:nodeId="105704">
    <graphics y="-68.3472597941959" z="0.0" x="822.4305942486412"/>
  </node>
  <node id="149440" label="GALNT4" cy:nodeId="105703">
    <graphics y="341.99230929760097" z="0.0" x="668.6774204205162"/>
  </node>
  <node id="149438" label="ATF3" cy:nodeId="105706">
    <graphics y="650.5981442585385" z="0.0" x="-1040.7243740130775"/>
  </node>
  <node id="149330" label="UGGT1" cy:nodeId="105705">
    <graphics y="292.80380221752284" z="0.0" x="714.8647067974694"/>
  </node>
  <node id="149376" label="B3GNT5" cy:nodeId="105707">
    <graphics y="746.1652218952572" z="0.0" x="626.5829227398522"/>
  </node>
  <node id="149340" label="HAS2" cy:nodeId="105709">
    <graphics y="459.87280246166347" z="0.0" x="-305.7078334857338"/>
  </node>
  <node id="149429" label="ATRX" cy:nodeId="105712">
    <graphics y="-115.48813656421544" z="0.0" x="1255.6311557720787"/>
  </node>
  <node id="149419" label="ALG10" cy:nodeId="105711">
    <graphics y="131.2949521198666" z="0.0" x="764.7389133404381"/>
  </node>
  <node id="149425" label="BACH1" cy:nodeId="105714">
    <graphics y="75.18299838451503" z="0.0" x="522.0221164654381"/>
  </node>
  <node id="149428" label="FKTN" cy:nodeId="105713">
    <graphics y="-2.7449648723209066" z="0.0" x="863.5953586529381"/>
  </node>
  <node id="149423" label="MAN1A1" cy:nodeId="105716">
    <graphics y="330.37011691478847" z="0.0" x="92.31792335020373"/>
  </node>
  <node id="149424" label="CSGALNACT2" cy:nodeId="105715">
    <graphics y="95.59088107494472" z="0.0" x="341.91988257871935"/>
  </node>
  <node id="149177" label="NDST4" cy:nodeId="114934">
    <graphics y="-83.60213497730138" z="0.0" x="152.23921851621935"/>
  </node>
  <node id="149335" label="CHST11" cy:nodeId="105718">
    <graphics y="318.7940060749447" z="0.0" x="-79.90485497010877"/>
  </node>
  <node id="149262" label="CHSY1" cy:nodeId="105717">
    <graphics y="150.41180392650722" z="0.0" x="1144.664908213485"/>
  </node>
  <node id="149395" label="SLC35F4" cy:nodeId="114933">
    <graphics y="692.9496457233822" z="0.0" x="-334.7180873919838"/>
  </node>
  <node id="149316" label="ST6GAL2" cy:nodeId="105720">
    <graphics y="1306.5708615436947" z="0.0" x="392.0251603554375"/>
  </node>
  <node id="149313" label="GFPT2" cy:nodeId="105719">
    <graphics y="580.806762422601" z="0.0" x="-188.22321434510877"/>
  </node>
  <node id="149454" label="DPM3" cy:nodeId="105722">
    <graphics y="-1731.0259402141178" z="0.0" x="-1930.42371483339"/>
  </node>
  <node id="149280" label="GLI3" cy:nodeId="114937">
    <graphics y="-207.99540356250645" z="0.0" x="-165.34504051698377"/>
  </node>
  <node id="149380" label="MGAT1" cy:nodeId="105724">
    <graphics y="-1031.9572756633365" z="0.0" x="-1372.7033779193275"/>
  </node>
  <node id="149420" label="BMI1" cy:nodeId="105726">
    <graphics y="205.49325534252284" z="0.0" x="781.3281772564537"/>
  </node>
  <node id="149447" label="ALG10B" cy:nodeId="105727">
    <graphics y="43.81813022045253" z="0.0" x="960.4739292095787"/>
  </node>
  <node id="149346" label="PIGN" cy:nodeId="105730">
    <graphics y="415.94274875072597" z="0.0" x="617.1525028179772"/>
  </node>
  <node id="149223" label="PIGW" cy:nodeId="105729">
    <graphics y="47.16476413158534" z="0.0" x="1231.1692417095787"/>
  </node>
  <node id="149387" label="SLC35E3" cy:nodeId="105732">
    <graphics y="65.81024142650722" z="0.0" x="843.5988376568444"/>
  </node>
  <node id="149451" label="FAM20B" cy:nodeId="105731">
    <graphics y="283.31408664135097" z="0.0" x="825.7743747662194"/>
  </node>
  <node id="149415" label="BRD1" cy:nodeId="105733">
    <graphics y="-578.5135195598209" z="0.0" x="392.19539831386874"/>
  </node>
  <node id="149404" label="C17orf49" cy:nodeId="105736">
    <graphics y="-2075.417785917243" z="0.0" x="-2094.023568349015"/>
  </node>
  <node id="149370" label="PMM1" cy:nodeId="105735">
    <graphics y="-2134.453186307868" z="0.0" x="-1779.34705467714"/>
  </node>
  <node id="149161" label="B4GALT1" cy:nodeId="107274">
    <graphics y="106.91499301342128" z="0.0" x="-39.42203636659315"/>
  </node>
  <node id="149403" label="CASP8AP2" cy:nodeId="105738">
    <graphics y="-3.8151858195865316" z="0.0" x="1428.51476172911"/>
  </node>
  <node id="149401" label="GALNS" cy:nodeId="105740">
    <graphics y="1916.193023408929" z="0.0" x="-1464.9375469256752"/>
  </node>
  <node id="149411" label="BRD2" cy:nodeId="107276">
    <graphics y="-106.41893414111973" z="0.0" x="589.4881046246178"/>
  </node>
  <node id="149295" label="FUT10" cy:nodeId="107278">
    <graphics y="66.1717373981869" z="0.0" x="69.79292945371935"/>
  </node>
  <node id="149406" label="BRD3" cy:nodeId="107277">
    <graphics y="-177.8857119426334" z="0.0" x="675.76427344786"/>
  </node>
  <node id="149435" label="RFNG" cy:nodeId="105744">
    <graphics y="-1847.9031374797428" z="0.0" x="-1679.685189442765"/>
  </node>
  <node id="149357" label="B4GALT5" cy:nodeId="107279">
    <graphics y="397.35693332103847" z="0.0" x="205.83240394102404"/>
  </node>
  <node id="149350" label="DNMT3A" cy:nodeId="107282">
    <graphics y="-217.06958798023106" z="0.0" x="150.1515567730553"/>
  </node>
  <node id="149400" label="CBX7" cy:nodeId="105745">
    <graphics y="576.4804074421322" z="0.0" x="-313.7243740130775"/>
  </node>
  <node id="149421" label="MAN2A2" cy:nodeId="105748">
    <graphics y="-144.2822555646503" z="0.0" x="561.5377567242272"/>
  </node>
  <node id="149230" label="MGAT3" cy:nodeId="105750">
    <graphics y="601.0602414265072" z="0.0" x="-1.8557521869056472"/>
  </node>
  <node id="149432" label="IDUA" cy:nodeId="105749">
    <graphics y="-1788.7326052531803" z="0.0" x="-1529.2575771380775"/>
  </node>
  <node id="149289" label="FUT2" cy:nodeId="107287">
    <graphics y="228.12985202221034" z="0.0" x="-801.6167079974525"/>
  </node>
  <node id="149339" label="HYAL1" cy:nodeId="105751">
    <graphics y="745.647094453851" z="0.0" x="-278.0541469622963"/>
  </node>
  <node id="149455" label="B3GAT3" cy:nodeId="105754">
    <graphics y="-1924.8151247844303" z="0.0" x="-1918.08533592714"/>
  </node>
  <node id="149246" label="GALK1" cy:nodeId="105753">
    <graphics y="-1696.9788210734928" z="0.0" x="-1852.16736717714"/>
  </node>
  <node id="149288" label="FUT3" cy:nodeId="107289">
    <graphics y="322.56298800853847" z="0.0" x="-657.47644920839"/>
  </node>
  <node id="149322" label="ERCC3" cy:nodeId="107292">
    <graphics y="-231.34674099536778" z="0.0" x="1237.4736850689537"/>
  </node>
  <node id="149388" label="CDK8" cy:nodeId="105756">
    <graphics y="33.34790011791347" z="0.0" x="754.6945407818444"/>
  </node>
  <node id="149434" label="DPM2" cy:nodeId="105758">
    <graphics y="-1800.1077273234928" z="0.0" x="-1779.490365224015"/>
  </node>
  <node id="149204" label="HK1" cy:nodeId="107293">
    <graphics y="662.189574922601" z="0.0" x="-44.14444847596815"/>
  </node>
  <node id="149386" label="CDK9" cy:nodeId="105757">
    <graphics y="-1611.2061159953678" z="0.0" x="-1826.20984764589"/>
  </node>
  <node id="149431" label="PIGQ" cy:nodeId="105759">
    <graphics y="-1760.7160036906803" z="0.0" x="-1716.43982811464"/>
  </node>
  <node id="149152" label="MOGS" cy:nodeId="105762">
    <graphics y="-1874.2946169719303" z="0.0" x="-996.3933193255775"/>
  </node>
  <node id="149240" label="GNE" cy:nodeId="107297">
    <graphics y="-265.0238497600162" z="0.0" x="708.9213169048912"/>
  </node>
  <node id="149189" label="ALG11" cy:nodeId="107300">
    <graphics y="-107.98570278735997" z="0.0" x="1377.2743442486412"/>
  </node>
  <node id="149384" label="CEBPA" cy:nodeId="105764">
    <graphics y="-1838.2030642375553" z="0.0" x="-2097.04187889589"/>
  </node>
  <node id="149193" label="CHST12" cy:nodeId="105763">
    <graphics y="-1640.6703493938053" z="0.0" x="-1420.3740322162025"/>
  </node>
  <node id="149209" label="EXTL3" cy:nodeId="107299">
    <graphics y="984.3755490436947" z="0.0" x="-334.7744228412025"/>
  </node>
  <node id="149399" label="MFNG" cy:nodeId="105766">
    <graphics y="631.4210812702572" z="0.0" x="-231.05494041932752"/>
  </node>
  <node id="149385" label="NAGK" cy:nodeId="105765">
    <graphics y="-1523.5315554484928" z="0.0" x="-1861.515267567765"/>
  </node>
  <node id="149210" label="A4GALT" cy:nodeId="105768">
    <graphics y="818.6103512897885" z="0.0" x="-490.7091762591713"/>
  </node>
  <node id="149269" label="HDAC1" cy:nodeId="107303">
    <graphics y="1643.9170529499447" z="0.0" x="307.953367991317"/>
  </node>
  <node id="149375" label="CHD2" cy:nodeId="105770">
    <graphics y="-267.90953091235997" z="0.0" x="392.87832115398714"/>
  </node>
  <node id="149377" label="CHD1" cy:nodeId="105769">
    <graphics y="331.0854794636166" z="0.0" x="591.6821811627037"/>
  </node>
  <node id="149414" label="NDST2" cy:nodeId="105772">
    <graphics y="-228.70974758716466" z="0.0" x="507.2781436871178"/>
  </node>
  <node id="149356" label="EXT2" cy:nodeId="107307">
    <graphics y="-234.8963549480045" z="0.0" x="571.5409152935631"/>
  </node>
  <node id="149413" label="OGT" cy:nodeId="105771">
    <graphics y="-761.294311796149" z="0.0" x="284.62974433409045"/>
  </node>
  <node id="149374" label="CHD8" cy:nodeId="105774">
    <graphics y="-197.6913225993717" z="0.0" x="729.3939426373131"/>
  </node>
  <node id="149242" label="KAT2B" cy:nodeId="107312">
    <graphics y="49.979171480218156" z="0.0" x="469.6157901714928"/>
  </node>
  <node id="149290" label="LAMP3" cy:nodeId="105776">
    <graphics y="637.1349484577572" z="0.0" x="-124.54352684510877"/>
  </node>
  <node id="149426" label="GAL3ST4" cy:nodeId="105778">
    <graphics y="805.7948605671322" z="0.0" x="-349.864876942765"/>
  </node>
  <node id="149231" label="KLF11" cy:nodeId="107316">
    <graphics y="334.0836484089291" z="0.0" x="427.92367820249865"/>
  </node>
  <node id="149372" label="CPSF3L" cy:nodeId="105780">
    <graphics y="-1919.3814089641178" z="0.0" x="-1777.335580067765"/>
  </node>
  <node id="149232" label="KDM6B" cy:nodeId="107315">
    <graphics y="494.9851681843197" z="0.0" x="405.25222281919787"/>
  </node>
  <node id="149297" label="DSE" cy:nodeId="105779">
    <graphics y="822.2225949421322" z="0.0" x="-74.6308376361244"/>
  </node>
  <node id="149229" label="KLF5" cy:nodeId="107318">
    <graphics y="490.2671506061947" z="0.0" x="-499.89295311464"/>
  </node>
  <node id="149433" label="B4GALT7" cy:nodeId="105782">
    <graphics y="-1701.7251589641178" z="0.0" x="-1692.821908192765"/>
  </node>
  <node id="149430" label="B3GALT6" cy:nodeId="105781">
    <graphics y="-1930.0629275188053" z="0.0" x="-1669.45008202089"/>
  </node>
  <node id="149226" label="LDB1" cy:nodeId="107320">
    <graphics y="63.83862277416347" z="0.0" x="169.00200538145373"/>
  </node>
  <node id="149238" label="B4GALNT4" cy:nodeId="105784">
    <graphics y="-1377.2597048625553" z="0.0" x="-1113.2785732318275"/>
  </node>
  <node id="149118" label="ABO" cy:nodeId="107319">
    <graphics y="448.42517062572597" z="0.0" x="-849.7763759662025"/>
  </node>
  <node id="149368" label="CREB3" cy:nodeId="105786">
    <graphics y="2132.8266598835385" z="0.0" x="-2219.5297252704017"/>
  </node>
  <node id="149369" label="CREB1" cy:nodeId="105785">
    <graphics y="-494.5094607219303" z="0.0" x="750.761587900985"/>
  </node>
  <node id="149217" label="MED12" cy:nodeId="107324">
    <graphics y="-206.96540859790684" z="0.0" x="883.1999729107506"/>
  </node>
  <node id="149363" label="CREB3L4" cy:nodeId="105788">
    <graphics y="1906.8954465046322" z="0.0" x="-2301.88123436464"/>
  </node>
  <node id="149221" label="MBD3" cy:nodeId="107323">
    <graphics y="-1783.6746218547428" z="0.0" x="-1848.04090233339"/>
  </node>
  <node id="149367" label="GMPPA" cy:nodeId="105787">
    <graphics y="2012.6795041218197" z="0.0" x="-2264.846192555558"/>
  </node>
  <node id="149201" label="NCOR2" cy:nodeId="107326">
    <graphics y="-0.08082607837559408" z="0.0" x="315.46243934141467"/>
  </node>
  <node id="149362" label="CREBBP" cy:nodeId="105790">
    <graphics y="-352.1266787395084" z="0.0" x="490.75344733702013"/>
  </node>
  <node id="149213" label="MEF2D" cy:nodeId="107325">
    <graphics y="686.4384762897885" z="0.0" x="-672.6076747943275"/>
  </node>
  <node id="149318" label="PAPSS2" cy:nodeId="107328">
    <graphics y="802.9015500202572" z="0.0" x="221.69962195860217"/>
  </node>
  <node id="149409" label="POFUT1" cy:nodeId="105792">
    <graphics y="69.8589169636166" z="0.0" x="710.3835361431725"/>
  </node>
  <node id="149278" label="COG7" cy:nodeId="105791">
    <graphics y="642.7090451374447" z="0.0" x="1250.22081641661"/>
  </node>
  <node id="149412" label="POFUT2" cy:nodeId="107327">
    <graphics y="-857.6437380656803" z="0.0" x="394.8014975021965"/>
  </node>
  <node id="149358" label="CTNNB1" cy:nodeId="105794">
    <graphics y="116.09716769603847" z="0.0" x="480.2761447857506"/>
  </node>
  <node id="149198" label="NFYA" cy:nodeId="107329">
    <graphics y="522.8694455280697" z="0.0" x="856.2235935162194"/>
  </node>
  <node id="149360" label="CTBP1" cy:nodeId="105793">
    <graphics y="-1214.5248415813053" z="0.0" x="-1921.94422264589"/>
  </node>
  <node id="149136" label="PIGY" cy:nodeId="107332">
    <graphics y="1987.4731137409603" z="0.0" x="-1935.1487743426674"/>
  </node>
  <node id="149139" label="B4GALT6" cy:nodeId="107331">
    <graphics y="45.08337375072597" z="0.0" x="-282.5949184466713"/>
  </node>
  <node id="149179" label="PHF8" cy:nodeId="107334">
    <graphics y="136.35400363353847" z="0.0" x="936.7634799908287"/>
  </node>
  <node id="149382" label="ALG3" cy:nodeId="105797">
    <graphics y="-1814.3103640422428" z="0.0" x="-2301.88123436464"/>
  </node>
  <node id="149160" label="RYBP" cy:nodeId="107338">
    <graphics y="485.74743625072597" z="0.0" x="965.8308628033287"/>
  </node>
  <node id="149345" label="EBF1" cy:nodeId="105804">
    <graphics y="486.5820920124447" z="0.0" x="-139.89985008729627"/>
  </node>
  <node id="149343" label="ST3GAL2" cy:nodeId="105806">
    <graphics y="281.33773776439784" z="0.0" x="-8.910256581436897"/>
  </node>
  <node id="149319" label="CSGALNACT1" cy:nodeId="105805">
    <graphics y="1480.7442013874447" z="0.0" x="250.23519019590685"/>
  </node>
  <node id="149150" label="SMARCC1" cy:nodeId="107344">
    <graphics y="147.70709201244472" z="0.0" x="879.0829379986412"/>
  </node>
  <node id="149336" label="B3GALT2" cy:nodeId="105808">
    <graphics y="333.7128293171322" z="0.0" x="-282.06971092714"/>
  </node>
  <node id="149153" label="SMARCA4" cy:nodeId="107343">
    <graphics y="-1765.1412966594303" z="0.0" x="-1074.8645107318275"/>
  </node>
  <node id="149396" label="CHST3" cy:nodeId="105807">
    <graphics y="532.3467404499447" z="0.0" x="-245.65656395448377"/>
  </node>
  <node id="149146" label="SP2" cy:nodeId="107346">
    <graphics y="-15.830047880133407" z="0.0" x="576.2140872906334"/>
  </node>
  <node id="149296" label="FUT4" cy:nodeId="105810">
    <graphics y="252.73663302806972" z="0.0" x="82.28874854551623"/>
  </node>
  <node id="149148" label="SOX2" cy:nodeId="107345">
    <graphics y="404.69824191478847" z="0.0" x="-620.0908901263588"/>
  </node>
  <node id="149284" label="TPST1" cy:nodeId="105809">
    <graphics y="1165.7119748249447" z="0.0" x="-325.9999477435463"/>
  </node>
  <node id="149138" label="STAT6" cy:nodeId="107348">
    <graphics y="839.8185422077572" z="0.0" x="-184.37305565370252"/>
  </node>
  <node id="149141" label="STAT3" cy:nodeId="107347">
    <graphics y="227.4558407917416" z="0.0" x="349.6934459637291"/>
  </node>
  <node id="149134" label="SVIL" cy:nodeId="107349">
    <graphics y="-168.99135807605626" z="0.0" x="-64.54749413026502"/>
  </node>
  <node id="149332" label="EGLN2" cy:nodeId="105813">
    <graphics y="-964.275024686774" z="0.0" x="-1467.5129482318275"/>
  </node>
  <node id="149445" label="ASCL2" cy:nodeId="106837">
    <graphics y="741.9636227741635" z="0.0" x="-566.289193349015"/>
  </node>
  <node id="149344" label="ST6GALNAC3" cy:nodeId="105815">
    <graphics y="456.9461056843197" z="0.0" x="-3.2555324603431472"/>
  </node>
  <node id="149444" label="ST6GALNAC4" cy:nodeId="106839">
    <graphics y="640.6069943561947" z="0.0" x="-377.0449916888588"/>
  </node>
  <node id="149205" label="HPSE2" cy:nodeId="105817">
    <graphics y="992.7318722858822" z="0.0" x="-188.70887108339002"/>
  </node>
  <node id="149458" label="SLC35E1" cy:nodeId="106844">
    <graphics y="-23.979469572027938" z="0.0" x="795.9517429302819"/>
  </node>
  <node id="149123" label="TFCP2" cy:nodeId="107355">
    <graphics y="-460.2636111125553" z="0.0" x="1074.30626563536"/>
  </node>
  <node id="149331" label="EHF" cy:nodeId="105819">
    <graphics y="150.2162167683041" z="0.0" x="808.9831760357506"/>
  </node>
  <node id="149405" label="BRD4" cy:nodeId="106843">
    <graphics y="-174.89676884265782" z="0.0" x="471.4119556378014"/>
  </node>
  <node id="149402" label="CBFA2T3" cy:nodeId="106845">
    <graphics y="1906.8954465046322" z="0.0" x="-1564.5043727923744"/>
  </node>
  <node id="149273" label="COG6" cy:nodeId="105824">
    <graphics y="449.7656857624447" z="0.0" x="693.1526401470787"/>
  </node>
  <node id="149389" label="CDK12" cy:nodeId="106848">
    <graphics y="-209.22106579395177" z="0.0" x="974.28233985411"/>
  </node>
  <node id="149326" label="COG3" cy:nodeId="105823">
    <graphics y="135.29513522533534" z="0.0" x="1428.502798838485"/>
  </node>
  <node id="149353" label="DCP1A" cy:nodeId="106850">
    <graphics y="-263.01775387378575" z="0.0" x="1111.83898047911"/>
  </node>
  <node id="149373" label="CLOCK" cy:nodeId="106849">
    <graphics y="-376.10220364185216" z="0.0" x="761.3574741314537"/>
  </node>
  <node id="149325" label="ELL2" cy:nodeId="106852">
    <graphics y="490.23596164135097" z="0.0" x="1215.7822177837975"/>
  </node>
  <node id="149327" label="ELK4" cy:nodeId="105827">
    <graphics y="105.5926358356869" z="0.0" x="984.2125766705162"/>
  </node>
  <node id="149371" label="GALT" cy:nodeId="106851">
    <graphics y="-1826.3435671672428" z="0.0" x="-1957.52430077089"/>
  </node>
  <node id="149260" label="XYLT1" cy:nodeId="106854">
    <graphics y="156.78002902416347" z="0.0" x="372.0568950604088"/>
  </node>
  <node id="149321" label="ERCC6" cy:nodeId="105830">
    <graphics y="-41.578575406988875" z="0.0" x="632.1077487896569"/>
  </node>
  <node id="149323" label="EP400" cy:nodeId="105829">
    <graphics y="-102.92074230762364" z="0.0" x="861.4635532330162"/>
  </node>
  <node id="149320" label="ERG" cy:nodeId="105832">
    <graphics y="1156.7538449421322" z="0.0" x="294.2744052837975"/>
  </node>
  <node id="149249" label="ST8SIA4" cy:nodeId="105834">
    <graphics y="675.6076047077572" z="0.0" x="93.93688086973498"/>
  </node>
  <node id="149398" label="GCNT4" cy:nodeId="106858">
    <graphics y="449.02478000072597" z="0.0" x="-171.01538963807752"/>
  </node>
  <node id="149227" label="ST3GAL5" cy:nodeId="106857">
    <graphics y="512.6487424030697" z="0.0" x="-571.7524501849525"/>
  </node>
  <node id="149392" label="UST" cy:nodeId="105836">
    <graphics y="542.9965817585385" z="0.0" x="-113.97834129823377"/>
  </node>
  <node id="149329" label="GALNT7" cy:nodeId="106859">
    <graphics y="334.5920712604916" z="0.0" x="1097.329947275985"/>
  </node>
  <node id="149306" label="CHST2" cy:nodeId="105838">
    <graphics y="575.7107541218197" z="0.0" x="-379.973763661515"/>
  </node>
  <node id="149186" label="SULT1C4" cy:nodeId="105837">
    <graphics y="537.3718869343197" z="0.0" x="235.70372657285998"/>
  </node>
  <node id="149397" label="CHST15" cy:nodeId="106861">
    <graphics y="373.82727023510097" z="0.0" x="-162.04877586854627"/>
  </node>
  <node id="149307" label="ST8SIA1" cy:nodeId="105840">
    <graphics y="392.2182004108822" z="0.0" x="-266.01502342714"/>
  </node>
  <node id="149276" label="GRHL1" cy:nodeId="106866">
    <graphics y="995.8596799030697" z="0.0" x="645.1914890240319"/>
  </node>
  <node id="149391" label="HS3ST3B1" cy:nodeId="105841">
    <graphics y="400.54687472728847" z="0.0" x="47.8188693951256"/>
  </node>
  <node id="149303" label="MGAT2" cy:nodeId="106868">
    <graphics y="41.23577853588222" z="0.0" x="1143.9765537212975"/>
  </node>
  <node id="149324" label="EXTL2" cy:nodeId="105844">
    <graphics y="412.3899533405697" z="0.0" x="1274.4100864361412"/>
  </node>
  <node id="149263" label="HIF1A" cy:nodeId="106867">
    <graphics y="229.56225558666347" z="0.0" x="726.03966407286"/>
  </node>
  <node id="149354" label="ARSB" cy:nodeId="105843">
    <graphics y="436.87561007885097" z="0.0" x="288.3482654522545"/>
  </node>
  <node id="149308" label="EZH1" cy:nodeId="105846">
    <graphics y="541.1636349811947" z="0.0" x="-162.69318504823377"/>
  </node>
  <node id="149190" label="SLC35B4" cy:nodeId="105845">
    <graphics y="-215.90588406177403" z="0.0" x="1353.001333994735"/>
  </node>
  <node id="149247" label="IRF3" cy:nodeId="106872">
    <graphics y="-1854.7787478313053" z="0.0" x="-1852.65662498964"/>
  </node>
  <node id="149250" label="IRF2" cy:nodeId="106871">
    <graphics y="778.6669919147885" z="0.0" x="113.64671973692248"/>
  </node>
  <node id="149237" label="KDM4A" cy:nodeId="106874">
    <graphics y="-298.9712527141178" z="0.0" x="988.6916416119225"/>
  </node>
  <node id="149305" label="FOXA1" cy:nodeId="105850">
    <graphics y="206.53988620189784" z="0.0" x="1072.876822275985"/>
  </node>
  <node id="149225" label="LEF1" cy:nodeId="106875">
    <graphics y="214.58715793041347" z="0.0" x="-119.04340477479627"/>
  </node>
  <node id="149416" label="GLCE" cy:nodeId="105851">
    <graphics y="262.1164853229916" z="0.0" x="444.4917743633873"/>
  </node>
  <node id="149215" label="MEF2B" cy:nodeId="106877">
    <graphics y="-1967.3930056438053" z="0.0" x="-1851.12098045839"/>
  </node>
  <node id="149298" label="FOXO1" cy:nodeId="105856">
    <graphics y="469.21069308666347" z="0.0" x="-71.72037621034315"/>
  </node>
  <node id="149301" label="GNPNAT1" cy:nodeId="105855">
    <graphics y="244.65475436596034" z="0.0" x="1152.806021494735"/>
  </node>
  <node id="149302" label="GFPT1" cy:nodeId="106882">
    <graphics y="285.7201230183041" z="0.0" x="1030.4987705181725"/>
  </node>
  <node id="149174" label="PPARA" cy:nodeId="106881">
    <graphics y="-153.7358906612003" z="0.0" x="365.4550140331871"/>
  </node>
  <node id="149251" label="HK3" cy:nodeId="105859">
    <graphics y="-27.503570829352157" z="0.0" x="-573.7241298724525"/>
  </node>
  <node id="149337" label="SULF1" cy:nodeId="106883">
    <graphics y="451.55017062572597" z="0.0" x="-249.97272606385877"/>
  </node>
  <node id="149285" label="GATA6" cy:nodeId="105862">
    <graphics y="1357.5718381061947" z="0.0" x="-397.6379482318275"/>
  </node>
  <node id="149156" label="SIRT6" cy:nodeId="106885">
    <graphics y="-1851.4114382609928" z="0.0" x="-1753.370736317765"/>
  </node>
  <node id="149294" label="GABPA" cy:nodeId="105861">
    <graphics y="-227.07481411548497" z="0.0" x="819.8063266705162"/>
  </node>
  <node id="149283" label="GATAD1" cy:nodeId="105863">
    <graphics y="-1102.7433474406803" z="0.0" x="-103.27655907167127"/>
  </node>
  <node id="149338" label="EXTL1" cy:nodeId="106887">
    <graphics y="879.7871701374447" z="0.0" x="-288.9114467669838"/>
  </node>
  <node id="149279" label="GLYR1" cy:nodeId="105866">
    <graphics y="358.7661740436947" z="0.0" x="984.1022251080162"/>
  </node>
  <node id="149107" label="ZBTB10" cy:nodeId="106894">
    <graphics y="410.47253390697597" z="0.0" x="1079.3073642681725"/>
  </node>
  <node id="149275" label="GTF2F1" cy:nodeId="105870">
    <graphics y="-2052.2365115031803" z="0.0" x="-1521.36170311464"/>
  </node>
  <node id="149241" label="CTBS" cy:nodeId="105869">
    <graphics y="-302.84529141040684" z="0.0" x="203.0638645123131"/>
  </node>
  <node id="149274" label="GTF2I" cy:nodeId="105871">
    <graphics y="192.90795871166347" z="0.0" x="839.62218360411"/>
  </node>
  <node id="149457" label="PIGO" cy:nodeId="105874">
    <graphics y="-70.76889828296544" z="0.0" x="757.4799716900475"/>
  </node>
  <node id="149270" label="HCFC1" cy:nodeId="105873">
    <graphics y="-90.7702334270084" z="0.0" x="645.7414768170006"/>
  </node>
  <node id="149266" label="HECTD1" cy:nodeId="105875">
    <graphics y="403.35302707103847" z="0.0" x="819.2893894146569"/>
  </node>
  <node id="149359" label="TSTA3" cy:nodeId="105880">
    <graphics y="-1334.2577517375553" z="0.0" x="-1829.843880849015"/>
  </node>
  <node id="149258" label="HSF1" cy:nodeId="105879">
    <graphics y="-1568.3301394328678" z="0.0" x="-1703.771126942765"/>
  </node>
  <node id="149255" label="IKZF1" cy:nodeId="105882">
    <graphics y="-117.22623089404942" z="0.0" x="-405.7056362201088"/>
  </node>
  <node id="149257" label="GPAA1" cy:nodeId="105881">
    <graphics y="-1454.5267947063053" z="0.0" x="-1560.82654686464"/>
  </node>
  <node id="149185" label="LIPA" cy:nodeId="105884">
    <graphics y="301.0442502155697" z="0.0" x="309.5303180645592"/>
  </node>
  <node id="149253" label="INO80" cy:nodeId="105885">
    <graphics y="-537.4945681438053" z="0.0" x="980.8123081158287"/>
  </node>
  <node id="149252" label="IRF1" cy:nodeId="105887">
    <graphics y="212.97058078197597" z="0.0" x="-343.0686733294838"/>
  </node>
  <node id="149244" label="JMJD1C" cy:nodeId="105892">
    <graphics y="2.098617280999406" z="0.0" x="386.2367494534142"/>
  </node>
  <node id="149349" label="MGAT5" cy:nodeId="105893">
    <graphics y="164.52560397533534" z="0.0" x="297.53565864073107"/>
  </node>
  <node id="149243" label="JUN" cy:nodeId="105895">
    <graphics y="777.3738400593197" z="0.0" x="-1001.104134755265"/>
  </node>
  <node id="149120" label="GNB1" cy:nodeId="105902">
    <graphics y="-726.2326052531803" z="0.0" x="1364.4219272564537"/>
  </node>
  <node id="149239" label="KDM1A" cy:nodeId="105901">
    <graphics y="-903.1826784953678" z="0.0" x="-412.49451561464"/>
  </node>
  <node id="149235" label="KDM5A" cy:nodeId="105904">
    <graphics y="79.97615023998378" z="0.0" x="790.5086887310631"/>
  </node>
  <node id="149351" label="DLX1" cy:nodeId="120754">
    <graphics y="-544.756225858649" z="0.0" x="119.9265354107506"/>
  </node>
  <node id="149355" label="GNS" cy:nodeId="105905">
    <graphics y="151.13488742260097" z="0.0" x="575.8494022320397"/>
  </node>
  <node id="149286" label="SLC35D3" cy:nodeId="120756">
    <graphics y="335.16464206127284" z="0.0" x="-792.7282802630775"/>
  </node>
  <node id="149233" label="KDM5B" cy:nodeId="105907">
    <graphics y="-147.86469176860692" z="0.0" x="759.7531650494225"/>
  </node>
  <node id="149347" label="DYRK1A" cy:nodeId="120755">
    <graphics y="519.4425656452572" z="0.0" x="611.514776987899"/>
  </node>
  <node id="149277" label="GMEB1" cy:nodeId="120757">
    <graphics y="-615.1664126262272" z="0.0" x="899.8625705670006"/>
  </node>
  <node id="149222" label="MAZ" cy:nodeId="105916">
    <graphics y="-2003.8065798625553" z="0.0" x="-1751.25818748964"/>
  </node>
  <node id="149151" label="MGAT4B" cy:nodeId="105918">
    <graphics y="-1626.9143679484928" z="0.0" x="-1194.8530361224525"/>
  </node>
  <node id="149256" label="B4GALT2" cy:nodeId="105917">
    <graphics y="-1588.1162722453678" z="0.0" x="-1577.151986317765"/>
  </node>
  <node id="149220" label="MECOM" cy:nodeId="105919">
    <graphics y="66.70582553295253" z="0.0" x="-421.7038051654213"/>
  </node>
  <node id="149333" label="IDS" cy:nodeId="105922">
    <graphics y="361.0717160358822" z="0.0" x="248.12972144590685"/>
  </node>
  <node id="149219" label="MECP2" cy:nodeId="105921">
    <graphics y="77.34403964428066" z="0.0" x="270.33596686827013"/>
  </node>
  <node id="149218" label="MED1" cy:nodeId="105924">
    <graphics y="-286.9030917033756" z="0.0" x="885.2392490337975"/>
  </node>
  <node id="149407" label="NDST1" cy:nodeId="105923">
    <graphics y="98.41487094310878" z="0.0" x="606.0194309185631"/>
  </node>
  <node id="149299" label="GALNT11" cy:nodeId="107974">
    <graphics y="411.2212521686947" z="0.0" x="1420.0825107525475"/>
  </node>
  <node id="149216" label="MEF2A" cy:nodeId="105925">
    <graphics y="255.98858615306972" z="0.0" x="225.9955051373131"/>
  </node>
  <node id="149427" label="AUTS2" cy:nodeId="107973">
    <graphics y="1082.4849240436947" z="0.0" x="-520.5432216693275"/>
  </node>
  <node id="149212" label="MEIS1" cy:nodeId="105928">
    <graphics y="633.1921383991635" z="0.0" x="-284.3234340716713"/>
  </node>
  <node id="149248" label="FUT8" cy:nodeId="107976">
    <graphics y="565.1854855671322" z="0.0" x="329.0227725933678"/>
  </node>
  <node id="149287" label="CHST6" cy:nodeId="105930">
    <graphics y="339.84753390697597" z="0.0" x="-524.4955532122963"/>
  </node>
  <node id="149207" label="MRE11A" cy:nodeId="105931">
    <graphics y="-386.5802615031803" z="0.0" x="968.83458594786"/>
  </node>
  <node id="149379" label="B3GNT8" cy:nodeId="107983">
    <graphics y="113.03109713939784" z="0.0" x="-590.5312587787025"/>
  </node>
  <node id="149105" label="SLC35C2" cy:nodeId="107986">
    <graphics y="-1550.8880007609928" z="0.0" x="-1979.48816795839"/>
  </node>
  <node id="149206" label="MYH11" cy:nodeId="105937">
    <graphics y="582.6342160358822" z="0.0" x="-246.03577538026502"/>
  </node>
  <node id="149203" label="MZF1" cy:nodeId="105942">
    <graphics y="-1582.3362429484928" z="0.0" x="-2120.335580067765"/>
  </node>
  <node id="149390" label="B4GALNT1" cy:nodeId="107990">
    <graphics y="715.7996213093197" z="0.0" x="-430.2938930560463"/>
  </node>
  <node id="149437" label="HAS3" cy:nodeId="105941">
    <graphics y="646.0812985554135" z="0.0" x="-811.943978505265"/>
  </node>
  <node id="149200" label="NFAT5" cy:nodeId="105943">
    <graphics y="638.1001584186947" z="0.0" x="974.660513682235"/>
  </node>
  <node id="149281" label="GLI1" cy:nodeId="107991">
    <graphics y="521.2809445515072" z="0.0" x="-45.3086940814369"/>
  </node>
  <node id="149199" label="NFIC" cy:nodeId="105945">
    <graphics y="33.05416842846034" z="0.0" x="552.8674381207115"/>
  </node>
  <node id="149264" label="HEYL" cy:nodeId="107993">
    <graphics y="984.8775021686947" z="0.0" x="-429.816048817765"/>
  </node>
  <node id="149195" label="NPAT" cy:nodeId="105948">
    <graphics y="510.51232882885097" z="0.0" x="754.4308078716881"/>
  </node>
  <node id="149196" label="NIPBL" cy:nodeId="105947">
    <graphics y="292.4060666218197" z="0.0" x="524.2967746685631"/>
  </node>
  <node id="149459" label="SLC35D1" cy:nodeId="105950">
    <graphics y="328.34701510814784" z="0.0" x="763.21153907286"/>
  </node>
  <node id="149191" label="NR2C2" cy:nodeId="105949">
    <graphics y="12.261428560296281" z="0.0" x="924.7604892681725"/>
  </node>
  <node id="149236" label="KDM4C" cy:nodeId="107997">
    <graphics y="-57.57328060718419" z="0.0" x="712.7688205670006"/>
  </node>
  <node id="149184" label="NR5A2" cy:nodeId="105952">
    <graphics y="537.4914548054135" z="0.0" x="49.61849097715685"/>
  </node>
  <node id="149304" label="GALNT3" cy:nodeId="108000">
    <graphics y="284.86975070385097" z="0.0" x="1485.4990146587975"/>
  </node>
  <node id="149188" label="NR2F1" cy:nodeId="105951">
    <graphics y="524.0586545124447" z="0.0" x="-290.8742763568275"/>
  </node>
  <node id="149268" label="B3GNT6" cy:nodeId="107999">
    <graphics y="1806.8954465046322" z="0.0" x="310.71966437803576"/>
  </node>
  <node id="149328" label="PIGM" cy:nodeId="105954">
    <graphics y="133.8943173542416" z="0.0" x="1045.7852085064537"/>
  </node>
  <node id="149383" label="NANS" cy:nodeId="108002">
    <graphics y="-1944.9666140422428" z="0.0" x="-2273.068001942765"/>
  </node>
  <node id="149183" label="PBX1" cy:nodeId="105953">
    <graphics y="340.61889621166347" z="0.0" x="24.851492686141228"/>
  </node>
  <node id="149142" label="B3GNT7" cy:nodeId="108004">
    <graphics y="843.4458615436947" z="0.0" x="-715.9716884662025"/>
  </node>
  <node id="149181" label="PHF20" cy:nodeId="105956">
    <graphics y="21.168258394280656" z="0.0" x="818.1862705181725"/>
  </node>
  <node id="149182" label="PCGF1" cy:nodeId="105955">
    <graphics y="-1892.1608279094303" z="0.0" x="-1473.093880849015"/>
  </node>
  <node id="149228" label="GCNT3" cy:nodeId="108003">
    <graphics y="501.0835568561947" z="0.0" x="-702.365365224015"/>
  </node>
  <node id="149178" label="PIAS1" cy:nodeId="105958">
    <graphics y="169.05688449291347" z="0.0" x="509.26328925596545"/>
  </node>
  <node id="149180" label="PHF6" cy:nodeId="105957">
    <graphics y="277.40914889721034" z="0.0" x="1363.7456577252037"/>
  </node>
  <node id="149300" label="SLC17A5" cy:nodeId="108005">
    <graphics y="275.38366671947597" z="0.0" x="1236.1777255962975"/>
  </node>
  <node id="149175" label="POLR3A" cy:nodeId="105960">
    <graphics y="193.12231418041347" z="0.0" x="642.3059604595787"/>
  </node>
  <node id="149166" label="CHPF2" cy:nodeId="108007">
    <graphics y="1916.193023408929" z="0.0" x="-1664.5043727923744"/>
  </node>
  <node id="149176" label="POLR2B" cy:nodeId="105959">
    <graphics y="-166.3213274821842" z="0.0" x="626.0552432964928"/>
  </node>
  <node id="149341" label="CHST1" cy:nodeId="108010">
    <graphics y="258.0729367390072" z="0.0" x="-428.67322655214"/>
  </node>
  <node id="149171" label="RAC3" cy:nodeId="105964">
    <graphics y="-2096.474914823493" z="0.0" x="-1662.020150380265"/>
  </node>
  <node id="149172" label="PRKDC" cy:nodeId="105963">
    <graphics y="139.9891659870541" z="0.0" x="625.10948829161"/>
  </node>
  <node id="149317" label="MGAT5B" cy:nodeId="108014">
    <graphics y="1313.2376095905697" z="0.0" x="239.39456824766467"/>
  </node>
</graph>
