# Supplementary material for: A systems-based framework to computationally describe putative transcription factors and signaling pathways regulating glycan biosynthesis
Source: publisher site journal article supplement (doi:10.3762/bjoc.17.119), 2021-07-22
Supplement: Additional file 2 [file 1860-5397-17-119-S2.cys › CytoscapeSession-2021_03_21-12_01/views/121907-148007-SARC.xgmml]

<?xml version="1.0" encoding="UTF-8" standalone="yes"?>
<graph id="148007" label="SARC" cy:view="1" cy:networkId="121907" cy:visualStyle="default" cy:rendererId="org.cytoscape.ding" cy:documentVersion="3.0" xmlns:dc="http://purl.org/dc/elements/1.1/" xmlns:xlink="http://www.w3.org/1999/xlink" xmlns:rdf="http://www.w3.org/1999/02/22-rdf-syntax-ns#" xmlns:cy="http://www.cytoscape.org" xmlns="http://www.cs.rpi.edu/XGMML">
  <graphics>
    <att name="NETWORK_NODE_SELECTION" value="true" type="string" cy:type="String"/>
    <att name="NETWORK_CENTER_X_LOCATION" value="169.12786865234375" type="string" cy:type="String"/>
    <att name="NETWORK_HEIGHT" value="510.0" type="string" cy:type="String"/>
    <att name="NETWORK_TITLE" value="SARC" type="string" cy:type="String"/>
    <att name="NETWORK_EDGE_SELECTION" value="true" type="string" cy:type="String"/>
    <att name="NETWORK_CENTER_Y_LOCATION" value="158.2828369140625" type="string" cy:type="String"/>
    <att name="NETWORK_WIDTH" value="1312.0" type="string" cy:type="String"/>
    <att name="NETWORK_DEPTH" value="0.0" type="string" cy:type="String"/>
    <att name="NETWORK_SCALE_FACTOR" value="0.12492486100666876" type="string" cy:type="String"/>
    <att name="NETWORK_ANNOTATION_SELECTION" value="false" type="string" cy:type="String"/>
    <att name="NETWORK_CENTER_Z_LOCATION" value="0.0" type="string" cy:type="String"/>
  </graphics>
  <node id="148065" label="RCOR1" cy:nodeId="105969">
    <graphics y="-956.3719119603363" z="0.0" x="-549.8098162478677"/>
  </node>
  <node id="148081" label="NR2F2" cy:nodeId="108017">
    <graphics y="-1070.5301761204926" z="0.0" x="-65.44397915069976"/>
  </node>
  <node id="148064" label="RFX5" cy:nodeId="105972">
    <graphics y="-1134.6433963353363" z="0.0" x="7.6975690060385205"/>
  </node>
  <node id="148302" label="BCL3" cy:nodeId="111092">
    <graphics y="572.2842770045074" z="0.0" x="798.814146154476"/>
  </node>
  <node id="148334" label="ATF5" cy:nodeId="111091">
    <graphics y="1215.6008663599762" z="0.0" x="1344.7634259396323"/>
  </node>
  <node id="148063" label="RFX7" cy:nodeId="105974">
    <graphics y="-516.0111178929535" z="0.0" x="-355.0263842410318"/>
  </node>
  <node id="148255" label="CD59" cy:nodeId="111094">
    <graphics y="327.0073605006012" z="0.0" x="1238.6779767208823"/>
  </node>
  <node id="148068" label="PRDM4" cy:nodeId="108021">
    <graphics y="839.7959347193512" z="0.0" x="-1137.3961809939615"/>
  </node>
  <node id="148139" label="FPGT" cy:nodeId="105976">
    <graphics y="-734.6228580052582" z="0.0" x="-265.5848864382974"/>
  </node>
  <node id="148061" label="RNF2" cy:nodeId="105975">
    <graphics y="354.5603390162262" z="0.0" x="-649.4044512576334"/>
  </node>
  <node id="148228" label="CREB3L2" cy:nodeId="111095">
    <graphics y="-75.32876010486757" z="0.0" x="-603.5540789431802"/>
  </node>
  <node id="148058" label="RUNX1" cy:nodeId="105978">
    <graphics y="903.2179317896637" z="0.0" x="234.54754459197602"/>
  </node>
  <node id="148311" label="GLA" cy:nodeId="108026">
    <graphics y="744.3628292506012" z="0.0" x="665.590757482601"/>
  </node>
  <node id="148054" label="SCML2" cy:nodeId="108025">
    <graphics y="-979.6291751439301" z="0.0" x="-296.24048031036773"/>
  </node>
  <node id="148040" label="SRC" cy:nodeId="108028">
    <graphics y="-1385.94362826893" z="0.0" x="-33.19014156525054"/>
  </node>
  <node id="148193" label="PIGA" cy:nodeId="108027">
    <graphics y="-1507.1574344212738" z="0.0" x="-782.173402673649"/>
  </node>
  <node id="148029" label="TBP" cy:nodeId="108030">
    <graphics y="-1336.463891940805" z="0.0" x="166.09008609588227"/>
  </node>
  <node id="148056" label="RUNX2" cy:nodeId="105981">
    <graphics y="1027.6307735865387" z="0.0" x="530.7069073849448"/>
  </node>
  <node id="148033" label="STAT5B" cy:nodeId="108029">
    <graphics y="-894.9425906712738" z="0.0" x="8.46459781463227"/>
  </node>
  <node id="148052" label="SIN3A" cy:nodeId="105984">
    <graphics y="-1192.3260745579926" z="0.0" x="-301.13182247345367"/>
  </node>
  <node id="148073" label="UGCG" cy:nodeId="105985">
    <graphics y="-743.6092776829926" z="0.0" x="-151.86781109039703"/>
  </node>
  <node id="148149" label="ARSA" cy:nodeId="111105">
    <graphics y="635.7011471216949" z="0.0" x="1312.7990704708823"/>
  </node>
  <node id="148097" label="MXI1" cy:nodeId="111108">
    <graphics y="-1062.1368655736176" z="0.0" x="16.41729556853852"/>
  </node>
  <node id="148048" label="SMAD4" cy:nodeId="105987">
    <graphics y="-1248.6691531712738" z="0.0" x="-265.6249407595865"/>
  </node>
  <node id="148044" label="SMC3" cy:nodeId="105990">
    <graphics y="-816.7096499974457" z="0.0" x="-483.3708208865396"/>
  </node>
  <node id="148336" label="ATF4" cy:nodeId="108550">
    <graphics y="-401.4375133092133" z="0.0" x="1369.1170636349448"/>
  </node>
  <node id="148045" label="SMC1A" cy:nodeId="105989">
    <graphics y="-1089.02419467518" z="0.0" x="-406.6725481814615"/>
  </node>
  <node id="148307" label="GCNT1" cy:nodeId="108552">
    <graphics y="931.9153194849762" z="0.0" x="618.2315655880698"/>
  </node>
  <node id="148009" label="ZBTB2" cy:nodeId="108039">
    <graphics y="-273.7570132786957" z="0.0" x="-1054.8698748416177"/>
  </node>
  <node id="148304" label="UGDH" cy:nodeId="108551">
    <graphics y="1225.4958858912262" z="0.0" x="193.4721966915854"/>
  </node>
  <node id="148012" label="ALG9" cy:nodeId="108554">
    <graphics y="-1735.4516238743988" z="0.0" x="-358.48106563751617"/>
  </node>
  <node id="148330" label="BACH2" cy:nodeId="108553">
    <graphics y="638.2035274927887" z="0.0" x="-1088.3944720095865"/>
  </node>
  <node id="148039" label="SRF" cy:nodeId="105996">
    <graphics y="-1390.710962253305" z="0.0" x="-135.33728206818023"/>
  </node>
  <node id="148187" label="PMM2" cy:nodeId="108556">
    <graphics y="1012.3724728052887" z="0.0" x="207.6814252072104"/>
  </node>
  <node id="148210" label="DDOST" cy:nodeId="108555">
    <graphics y="1729.175290686396" z="0.0" x="-1020.5490130252115"/>
  </node>
  <node id="148290" label="B3GALNT1" cy:nodeId="111115">
    <graphics y="140.59525112560118" z="0.0" x="-737.6304949588052"/>
  </node>
  <node id="148136" label="GANAB" cy:nodeId="105998">
    <graphics y="1720.256830794123" z="0.0" x="-767.9560488528482"/>
  </node>
  <node id="148038" label="SSRP1" cy:nodeId="105997">
    <graphics y="1716.3325558131012" z="0.0" x="-656.8127154177896"/>
  </node>
  <node id="148076" label="PIGF" cy:nodeId="108557">
    <graphics y="1716.3325558131012" z="0.0" x="383.5549603634604"/>
  </node>
  <node id="148154" label="HPSE" cy:nodeId="106000">
    <graphics y="313.5715694849762" z="0.0" x="1424.4061261349448"/>
  </node>
  <node id="148037" label="STAT1" cy:nodeId="105999">
    <graphics y="-303.8659991795746" z="0.0" x="329.64575015838227"/>
  </node>
  <node id="148169" label="GALE" cy:nodeId="108559">
    <graphics y="356.97434048106993" z="0.0" x="269.3857709103354"/>
  </node>
  <node id="148035" label="STAT4" cy:nodeId="106002">
    <graphics y="570.2696285670074" z="0.0" x="857.9540997677573"/>
  </node>
  <node id="148313" label="GALNT6" cy:nodeId="108561">
    <graphics y="615.0854244654449" z="0.0" x="697.2634259396323"/>
  </node>
  <node id="148034" label="STAT5A" cy:nodeId="106003">
    <graphics y="151.57956509044493" z="0.0" x="733.8447247677573"/>
  </node>
  <node id="148241" label="CEBPD" cy:nodeId="108563">
    <graphics y="804.2612667506012" z="0.0" x="1270.1639386349448"/>
  </node>
  <node id="148030" label="TAF1" cy:nodeId="106006">
    <graphics y="-895.7158450658051" z="0.0" x="-559.678041345524"/>
  </node>
  <node id="148237" label="COG1" cy:nodeId="106005">
    <graphics y="-809.3616275365082" z="0.0" x="-208.693551904606"/>
  </node>
  <node id="148028" label="TCF12" cy:nodeId="106007">
    <graphics y="-645.9586734349457" z="0.0" x="-564.8490923709146"/>
  </node>
  <node id="148306" label="NAGA" cy:nodeId="108567">
    <graphics y="799.0093136256012" z="0.0" x="1035.3123761349448"/>
  </node>
  <node id="148027" label="TCF7L2" cy:nodeId="106010">
    <graphics y="-1275.4742068822113" z="0.0" x="-124.48943508331695"/>
  </node>
  <node id="148217" label="ALG5" cy:nodeId="106012">
    <graphics y="950.9910030787262" z="0.0" x="26.83593570525727"/>
  </node>
  <node id="148059" label="GALNT1" cy:nodeId="106014">
    <graphics y="512.8447628443512" z="0.0" x="-714.7480486697427"/>
  </node>
  <node id="148026" label="TEAD1" cy:nodeId="106013">
    <graphics y="-1054.1781253392426" z="0.0" x="-291.77881801788726"/>
  </node>
  <node id="148212" label="EBNA1BP2" cy:nodeId="108576">
    <graphics y="1733.420914274958" z="0.0" x="-1140.8000201052896"/>
  </node>
  <node id="148020" label="TTF2" cy:nodeId="106019">
    <graphics y="-897.4072513158051" z="0.0" x="-313.6882799929849"/>
  </node>
  <node id="148078" label="ST3GAL1" cy:nodeId="108579">
    <graphics y="-1477.5530643040863" z="0.0" x="138.17376529510102"/>
  </node>
  <node id="148017" label="USF2" cy:nodeId="106022">
    <graphics y="1877.48996548107" z="0.0" x="-58.16472805206695"/>
  </node>
  <node id="148194" label="EZH2" cy:nodeId="108582">
    <graphics y="-1359.0151004368988" z="0.0" x="-548.9752825564615"/>
  </node>
  <node id="148018" label="USF1" cy:nodeId="106021">
    <graphics y="89.21817593028868" z="0.0" x="404.4380475216635"/>
  </node>
  <node id="148197" label="ETV4" cy:nodeId="108581">
    <graphics y="788.2605343287262" z="0.0" x="-284.6679095095865"/>
  </node>
  <node id="148015" label="WDR5" cy:nodeId="106024">
    <graphics y="1359.2827511256012" z="0.0" x="345.6499615841635"/>
  </node>
  <node id="148016" label="VEZF1" cy:nodeId="106023">
    <graphics y="-1137.3294925267426" z="0.0" x="-513.4967974490396"/>
  </node>
  <node id="148162" label="CHPF" cy:nodeId="108583">
    <graphics y="1291.9119015162262" z="0.0" x="7.7890301876791455"/>
  </node>
  <node id="148013" label="YAP1" cy:nodeId="106026">
    <graphics y="-1402.2969607884613" z="0.0" x="-363.5106829470865"/>
  </node>
  <node id="148014" label="XRN2" cy:nodeId="106025">
    <graphics y="-1048.8004397923676" z="0.0" x="-637.0473955935709"/>
  </node>
  <node id="148243" label="HEXB" cy:nodeId="108585">
    <graphics y="980.7002315943512" z="0.0" x="1041.7592755490073"/>
  </node>
  <node id="148011" label="YY1" cy:nodeId="106028">
    <graphics y="-1121.7347049290863" z="0.0" x="-623.094789392399"/>
  </node>
  <node id="148303" label="SLC35C1" cy:nodeId="108588">
    <graphics y="1158.3992062037262" z="0.0" x="275.7894574337729"/>
  </node>
  <node id="148258" label="B3GALT4" cy:nodeId="106030">
    <graphics y="-9.482294040414445" z="0.0" x="671.9107648068198"/>
  </node>
  <node id="148010" label="ZBTB17" cy:nodeId="106029">
    <graphics y="300.31564907481993" z="0.0" x="417.19494449431977"/>
  </node>
  <node id="148103" label="SULT1A3" cy:nodeId="108594">
    <graphics y="2141.1852283900052" z="0.0" x="-952.8099535769693"/>
  </node>
  <node id="148167" label="HDAC6" cy:nodeId="108593">
    <graphics y="-1384.3567752415863" z="0.0" x="-768.2750262088052"/>
  </node>
  <node id="148163" label="HOXA1" cy:nodeId="108596">
    <graphics y="1106.5526485865387" z="0.0" x="30.031461828304145"/>
  </node>
  <node id="148164" label="HIRA" cy:nodeId="108595">
    <graphics y="-1085.7781619603363" z="0.0" x="-948.470033533024"/>
  </node>
  <node id="148115" label="MAFF" cy:nodeId="108598">
    <graphics y="-507.32094760486757" z="0.0" x="1283.9879132443198"/>
  </node>
  <node id="148130" label="KLF15" cy:nodeId="108597">
    <graphics y="-431.0597781712738" z="0.0" x="385.404966466976"/>
  </node>
  <node id="148196" label="ETV7" cy:nodeId="118329">
    <graphics y="545.7703609888824" z="0.0" x="1206.5340558224448"/>
  </node>
  <node id="148257" label="PIGP" cy:nodeId="113212">
    <graphics y="-1031.5367068822113" z="0.0" x="165.0329877072104"/>
  </node>
  <node id="148042" label="GALNT14" cy:nodeId="113215">
    <graphics y="1716.3325558131012" z="0.0" x="183.98813449676118"/>
  </node>
  <node id="148055" label="SATB1" cy:nodeId="108614">
    <graphics y="-111.12375827381288" z="0.0" x="-838.6434344119302"/>
  </node>
  <node id="148043" label="SOX11" cy:nodeId="108619">
    <graphics y="1725.630132717398" z="0.0" x="283.5549603634604"/>
  </node>
  <node id="148023" label="THAP1" cy:nodeId="108626">
    <graphics y="-1305.0301150853363" z="0.0" x="0.11410342986664546"/>
  </node>
  <node id="148066" label="RBPJ" cy:nodeId="113233">
    <graphics y="533.1570797388824" z="0.0" x="348.708921545101"/>
  </node>
  <node id="148021" label="TRRAP" cy:nodeId="108628">
    <graphics y="-1458.0533084447113" z="0.0" x="-476.9644488162271"/>
  </node>
  <node id="148019" label="UBE2I" cy:nodeId="108629">
    <graphics y="906.8010616724762" z="0.0" x="-292.11333645050445"/>
  </node>
  <node id="148242" label="HEXA" cy:nodeId="112216">
    <graphics y="689.9744015162262" z="0.0" x="1112.7962628536948"/>
  </node>
  <node id="148112" label="C1GALT1" cy:nodeId="109670">
    <graphics y="1391.4055538599762" z="0.0" x="1062.8623028927573"/>
  </node>
  <node id="148268" label="UXS1" cy:nodeId="109669">
    <graphics y="376.3408565943512" z="0.0" x="-536.6381853884927"/>
  </node>
  <node id="148119" label="NAGLU" cy:nodeId="109680">
    <graphics y="489.50913052013243" z="0.0" x="1382.5854474240073"/>
  </node>
  <node id="148166" label="HEY1" cy:nodeId="109679">
    <graphics y="664.9939327662262" z="0.0" x="64.6457806759604"/>
  </node>
  <node id="148084" label="NR1H2" cy:nodeId="109685">
    <graphics y="-164.5438785130707" z="0.0" x="737.3023663693198"/>
  </node>
  <node id="148297" label="BCOR" cy:nodeId="110788">
    <graphics y="-696.2156009251801" z="0.0" x="51.072721593929145"/>
  </node>
  <node id="148278" label="BTAF1" cy:nodeId="110789">
    <graphics y="-1197.023462253305" z="0.0" x="-1120.3576067752115"/>
  </node>
  <node id="148121" label="SGSH" cy:nodeId="110804">
    <graphics y="329.0567989771637" z="0.0" x="1045.0629864865073"/>
  </node>
  <node id="148351" label="ADNP" cy:nodeId="105684">
    <graphics y="96.1561947291168" z="0.0" x="904.7741681271323"/>
  </node>
  <node id="148156" label="GALK2" cy:nodeId="110806">
    <graphics y="-1824.6195926243988" z="0.0" x="-762.790346033024"/>
  </node>
  <node id="148349" label="AFF4" cy:nodeId="105686">
    <graphics y="-922.3276614720551" z="0.0" x="-488.5069292849771"/>
  </node>
  <node id="148350" label="FUT7" cy:nodeId="105685">
    <graphics y="372.27219204356993" z="0.0" x="856.9357892208823"/>
  </node>
  <node id="148347" label="STT3B" cy:nodeId="105688">
    <graphics y="-1020.6516971165863" z="0.0" x="-575.6293047732584"/>
  </node>
  <node id="148083" label="NR1H3" cy:nodeId="110807">
    <graphics y="900.9765987818512" z="0.0" x="1155.0078107052573"/>
  </node>
  <node id="148348" label="MAN1A2" cy:nodeId="105687">
    <graphics y="-875.4245853001801" z="0.0" x="-510.04605282013335"/>
  </node>
  <node id="148339" label="FUT11" cy:nodeId="105690">
    <graphics y="-208.94863315174257" z="0.0" x="-571.2568072146646"/>
  </node>
  <node id="148346" label="NEU3" cy:nodeId="105689">
    <graphics y="-883.8817996556488" z="0.0" x="-436.79626644318023"/>
  </node>
  <node id="148345" label="ACER2" cy:nodeId="105691">
    <graphics y="-879.1105594212738" z="0.0" x="-369.6513842410318"/>
  </node>
  <node id="148337" label="MAN2A1" cy:nodeId="105694">
    <graphics y="-734.2022342259613" z="0.0" x="-557.1252459353677"/>
  </node>
  <node id="148060" label="SLC35F5" cy:nodeId="105696">
    <graphics y="392.45895962169493" z="0.0" x="-782.5472430056802"/>
  </node>
  <node id="148287" label="SLC35A3" cy:nodeId="105695">
    <graphics y="-1072.90065951893" z="0.0" x="-470.1506060427896"/>
  </node>
  <node id="148057" label="GALNT10" cy:nodeId="105697">
    <graphics y="1014.0725460474762" z="0.0" x="368.82641422088227"/>
  </node>
  <node id="148342" label="RTF1" cy:nodeId="105700">
    <graphics y="-1108.47487826893" z="0.0" x="-348.794008142399"/>
  </node>
  <node id="148181" label="SLC35A5" cy:nodeId="105702">
    <graphics y="-504.98217197010194" z="0.0" x="-618.9499834841959"/>
  </node>
  <node id="148340" label="ATF1" cy:nodeId="105701">
    <graphics y="-63.46474643299257" z="0.0" x="-725.781068689274"/>
  </node>
  <node id="148338" label="ATF2" cy:nodeId="105704">
    <graphics y="-685.3992251927582" z="0.0" x="-464.497133142399"/>
  </node>
  <node id="148292" label="GALNT4" cy:nodeId="105703">
    <graphics y="-335.71866984913026" z="0.0" x="-809.9453142947427"/>
  </node>
  <node id="148308" label="HAS1" cy:nodeId="105708">
    <graphics y="774.0349483912262" z="0.0" x="788.8565045529135"/>
  </node>
  <node id="148049" label="B3GNT5" cy:nodeId="105707">
    <graphics y="199.81906704356993" z="0.0" x="-423.9873980349771"/>
  </node>
  <node id="148332" label="ATF7IP" cy:nodeId="105710">
    <graphics y="-1091.6404666478363" z="0.0" x="-1106.1198138064615"/>
  </node>
  <node id="148093" label="HAS2" cy:nodeId="105709">
    <graphics y="1424.7442989771637" z="0.0" x="-73.99465358917632"/>
  </node>
  <node id="148331" label="ALG10" cy:nodeId="105711">
    <graphics y="-1076.3602542454926" z="0.0" x="-799.654115564274"/>
  </node>
  <node id="148279" label="FKTN" cy:nodeId="105713">
    <graphics y="-1105.53200717518" z="0.0" x="-570.7046221560709"/>
  </node>
  <node id="148293" label="CSGALNACT2" cy:nodeId="105715">
    <graphics y="-110.4550113255707" z="0.0" x="-498.788392908024"/>
  </node>
  <node id="148265" label="CHSY1" cy:nodeId="105717">
    <graphics y="458.29831509044493" z="0.0" x="-284.25196254913726"/>
  </node>
  <node id="148298" label="GFPT2" cy:nodeId="105719">
    <graphics y="1002.3358517115387" z="0.0" x="717.459898107601"/>
  </node>
  <node id="148142" label="DPM3" cy:nodeId="105722">
    <graphics y="182.35873989513243" z="0.0" x="549.4363385372885"/>
  </node>
  <node id="148326" label="BATF" cy:nodeId="105721">
    <graphics y="653.1203365748199" z="0.0" x="825.218198888851"/>
  </node>
  <node id="148322" label="MGAT1" cy:nodeId="105724">
    <graphics y="639.3707027857574" z="0.0" x="1032.4179669552573"/>
  </node>
  <node id="148295" label="BMI1" cy:nodeId="105726">
    <graphics y="-182.93871493885194" z="0.0" x="-671.6085833377115"/>
  </node>
  <node id="148305" label="BCAT1" cy:nodeId="105725">
    <graphics y="1207.3327999537262" z="0.0" x="382.34728824431977"/>
  </node>
  <node id="148289" label="BRCA1" cy:nodeId="105728">
    <graphics y="-1137.85476108143" z="0.0" x="-695.035463220524"/>
  </node>
  <node id="148294" label="ALG10B" cy:nodeId="105727">
    <graphics y="-823.0484561497894" z="0.0" x="-635.7209185427896"/>
  </node>
  <node id="148179" label="PIGN" cy:nodeId="105730">
    <graphics y="-697.503900485727" z="0.0" x="-1017.2153338259927"/>
  </node>
  <node id="148288" label="PIGW" cy:nodeId="105729">
    <graphics y="-1193.11501498768" z="0.0" x="-543.6319903201334"/>
  </node>
  <node id="148260" label="FAM20B" cy:nodeId="105731">
    <graphics y="-1029.4878787572113" z="0.0" x="-116.93446529571929"/>
  </node>
  <node id="148285" label="ALG12" cy:nodeId="105734">
    <graphics y="-1528.6170291478363" z="0.0" x="-8.44397152130523"/>
  </node>
  <node id="148286" label="BRD1" cy:nodeId="105733">
    <graphics y="-1179.6287478978363" z="0.0" x="-218.7109316653482"/>
  </node>
  <node id="148277" label="C17orf49" cy:nodeId="105736">
    <graphics y="807.7679806177887" z="0.0" x="-41.084504968570855"/>
  </node>
  <node id="148335" label="PMM1" cy:nodeId="105735">
    <graphics y="-369.83220477649843" z="0.0" x="1207.6002179318198"/>
  </node>
  <node id="148274" label="CASP8AP2" cy:nodeId="105738">
    <graphics y="-631.1993350560394" z="0.0" x="-923.9045428103677"/>
  </node>
  <node id="148190" label="HYAL2" cy:nodeId="105737">
    <graphics y="331.5394649927887" z="0.0" x="691.5013409786948"/>
  </node>
  <node id="148343" label="ASH2L" cy:nodeId="107273">
    <graphics y="-1463.9401492650238" z="0.0" x="-216.46238887970367"/>
  </node>
  <node id="148267" label="GALNS" cy:nodeId="105740">
    <graphics y="620.3636227076324" z="0.0" x="-133.90061367218414"/>
  </node>
  <node id="148271" label="CBFB" cy:nodeId="105739">
    <graphics y="313.5354366724762" z="0.0" x="-366.0559557742349"/>
  </node>
  <node id="148178" label="FUT10" cy:nodeId="107278">
    <graphics y="-571.6410922581879" z="0.0" x="-692.1025408572427"/>
  </node>
  <node id="148283" label="BRD3" cy:nodeId="107277">
    <graphics y="-1097.9231814915863" z="0.0" x="-213.58859813873687"/>
  </node>
  <node id="148251" label="ST6GALNAC6" cy:nodeId="105746">
    <graphics y="249.36801723888243" z="0.0" x="1170.4285870724448"/>
  </node>
  <node id="148067" label="SLC35B3" cy:nodeId="107281">
    <graphics y="942.4099483912262" z="0.0" x="-1251.9436053103677"/>
  </node>
  <node id="148263" label="CBX7" cy:nodeId="105745">
    <graphics y="-843.712396579477" z="0.0" x="97.01739322478852"/>
  </node>
  <node id="148221" label="E2F3" cy:nodeId="107284">
    <graphics y="383.4857540552887" z="0.0" x="-1106.4669207400552"/>
  </node>
  <node id="148296" label="MAN2A2" cy:nodeId="105748">
    <graphics y="-878.4149112279144" z="0.0" x="-163.66906917755523"/>
  </node>
  <node id="148087" label="ST3GAL3" cy:nodeId="105747">
    <graphics y="1716.3325558131012" z="0.0" x="583.1217862301596"/>
  </node>
  <node id="148276" label="B3GAT3" cy:nodeId="105754">
    <graphics y="754.1911983912262" z="0.0" x="140.46941959197602"/>
  </node>
  <node id="148171" label="GALK1" cy:nodeId="105753">
    <graphics y="620.5241451685699" z="0.0" x="363.075620763851"/>
  </node>
  <node id="148205" label="ERCC3" cy:nodeId="107292">
    <graphics y="-1345.228540378305" z="0.0" x="-882.9277361697427"/>
  </node>
  <node id="148254" label="CDK8" cy:nodeId="105756">
    <graphics y="-972.3355350072113" z="0.0" x="-622.7391375369302"/>
  </node>
  <node id="148225" label="PAPSS1" cy:nodeId="107291">
    <graphics y="50.295354885366805" z="0.0" x="-635.7266558474771"/>
  </node>
  <node id="148256" label="CCDC101" cy:nodeId="105755">
    <graphics y="-1283.9080447728363" z="0.0" x="410.83080875213227"/>
  </node>
  <node id="148188" label="FOSL1" cy:nodeId="107294">
    <graphics y="886.7953243677887" z="0.0" x="486.72326480681977"/>
  </node>
  <node id="148310" label="DPM2" cy:nodeId="105758">
    <graphics y="548.5766354029449" z="0.0" x="632.3684064083823"/>
  </node>
  <node id="148253" label="CDK9" cy:nodeId="105757">
    <graphics y="157.35153774669493" z="0.0" x="1182.4868146115073"/>
  </node>
  <node id="148185" label="MAN1B1" cy:nodeId="105760">
    <graphics y="1106.9989376490387" z="0.0" x="362.63744937713227"/>
  </node>
  <node id="148252" label="PIGQ" cy:nodeId="105759">
    <graphics y="79.31140713146056" z="0.0" x="1412.4658185177573"/>
  </node>
  <node id="148184" label="FOXK1" cy:nodeId="107298">
    <graphics y="-1191.4931277806488" z="0.0" x="-762.0568255252115"/>
  </node>
  <node id="148250" label="POMT1" cy:nodeId="105761">
    <graphics y="-5.484918552133195" z="0.0" x="1307.0436993771323"/>
  </node>
  <node id="148344" label="GNE" cy:nodeId="107297">
    <graphics y="-1065.03347201893" z="0.0" x="-532.0580767459146"/>
  </node>
  <node id="148301" label="MFNG" cy:nodeId="105766">
    <graphics y="427.3437862818512" z="0.0" x="828.895444982601"/>
  </node>
  <node id="148325" label="NAGK" cy:nodeId="105765">
    <graphics y="509.94553188731993" z="0.0" x="916.2311993771323"/>
  </node>
  <node id="148248" label="CEBPB" cy:nodeId="105767">
    <graphics y="774.2917843287262" z="0.0" x="871.0692120724448"/>
  </node>
  <node id="148236" label="CHD2" cy:nodeId="105770">
    <graphics y="-977.9258670384613" z="0.0" x="-779.487123376774"/>
  </node>
  <node id="148240" label="CHD1" cy:nodeId="105769">
    <graphics y="-1020.8164920384613" z="0.0" x="-366.7714098757974"/>
  </node>
  <node id="148191" label="NDST2" cy:nodeId="105772">
    <graphics y="428.6893673365387" z="0.0" x="667.2142316036948"/>
  </node>
  <node id="148239" label="OGT" cy:nodeId="105771">
    <graphics y="-1016.3225345189301" z="0.0" x="-527.7064837283365"/>
  </node>
  <node id="148327" label="EXT2" cy:nodeId="107307">
    <graphics y="653.4708614771637" z="0.0" x="-968.5715349978677"/>
  </node>
  <node id="148234" label="CHD8" cy:nodeId="105774">
    <graphics y="-825.2663211400238" z="0.0" x="-423.2516039675943"/>
  </node>
  <node id="148319" label="NAAA" cy:nodeId="107310">
    <graphics y="712.9153194849762" z="0.0" x="920.3900128536948"/>
  </node>
  <node id="148235" label="CHD4" cy:nodeId="105773">
    <graphics y="-595.292978244516" z="0.0" x="-296.801462060856"/>
  </node>
  <node id="148246" label="GBA" cy:nodeId="107309">
    <graphics y="1091.1817989771637" z="0.0" x="988.4302960568198"/>
  </node>
  <node id="148140" label="KAT2B" cy:nodeId="107312">
    <graphics y="-929.6761111790863" z="0.0" x="-209.4860667056314"/>
  </node>
  <node id="148323" label="LAMP3" cy:nodeId="105776">
    <graphics y="266.5426388209137" z="0.0" x="825.4525128536948"/>
  </node>
  <node id="148233" label="CIITA" cy:nodeId="105775">
    <graphics y="255.99808315685118" z="0.0" x="931.6752911740073"/>
  </node>
  <node id="148132" label="KDM5C" cy:nodeId="107314">
    <graphics y="-1008.0711307103363" z="0.0" x="-688.7125872439615"/>
  </node>
  <node id="148300" label="MAN2B1" cy:nodeId="105777">
    <graphics y="451.49667934825743" z="0.0" x="963.6423321896323"/>
  </node>
  <node id="148131" label="KLF11" cy:nodeId="107316">
    <graphics y="-941.7610721165863" z="0.0" x="-124.59486950104156"/>
  </node>
  <node id="148232" label="CPSF3L" cy:nodeId="105780">
    <graphics y="1045.5199337427887" z="0.0" x="-239.9700411624185"/>
  </node>
  <node id="148151" label="B4GALT7" cy:nodeId="105782">
    <graphics y="809.6422481959137" z="0.0" x="302.79049503142915"/>
  </node>
  <node id="148129" label="KLF4" cy:nodeId="107317">
    <graphics y="1156.0209103052887" z="0.0" x="531.5142193966635"/>
  </node>
  <node id="148231" label="B3GALT6" cy:nodeId="105781">
    <graphics y="1097.4787960474762" z="0.0" x="-429.8259447879068"/>
  </node>
  <node id="148099" label="B4GALNT4" cy:nodeId="105784">
    <graphics y="2141.1852283900052" z="0.0" x="-1152.3767794436685"/>
  </node>
  <node id="148230" label="POMGNT1" cy:nodeId="105783">
    <graphics y="1186.2573605006012" z="0.0" x="-352.15550411407867"/>
  </node>
  <node id="148113" label="MBD2" cy:nodeId="107322">
    <graphics y="1212.2524776881012" z="0.0" x="974.6119366818198"/>
  </node>
  <node id="148229" label="CREB3" cy:nodeId="105786">
    <graphics y="-1229.1657352025238" z="0.0" x="301.218931310726"/>
  </node>
  <node id="148124" label="LIN9" cy:nodeId="107321">
    <graphics y="-1290.0122928197113" z="0.0" x="-374.84041011993804"/>
  </node>
  <node id="148108" label="MED12" cy:nodeId="107324">
    <graphics y="-1218.40017123768" z="0.0" x="-436.7802447146646"/>
  </node>
  <node id="148111" label="MBD3" cy:nodeId="107323">
    <graphics y="518.9018307154449" z="0.0" x="455.71423160369477"/>
  </node>
  <node id="148091" label="NCOR2" cy:nodeId="107326">
    <graphics y="-301.625612216684" z="0.0" x="-933.3510760134927"/>
  </node>
  <node id="148227" label="CREBBP" cy:nodeId="105790">
    <graphics y="-811.0630740697113" z="0.0" x="-323.75418270294585"/>
  </node>
  <node id="148094" label="B4GALT3" cy:nodeId="105789">
    <graphics y="815.9772091334137" z="0.0" x="-451.832826501774"/>
  </node>
  <node id="148101" label="MEF2D" cy:nodeId="107325">
    <graphics y="-1376.7828616673676" z="0.0" x="321.2918072872885"/>
  </node>
  <node id="148070" label="PAPSS2" cy:nodeId="107328">
    <graphics y="2031.8876514857086" z="0.0" x="-556.8127154177896"/>
  </node>
  <node id="148226" label="CTNNB1" cy:nodeId="105794">
    <graphics y="-355.10077853748476" z="0.0" x="-567.309877283024"/>
  </node>
  <node id="148222" label="E2F1" cy:nodeId="105796">
    <graphics y="-1739.2493533665863" z="0.0" x="-188.17758644287505"/>
  </node>
  <node id="148224" label="DEK" cy:nodeId="105795">
    <graphics y="-1206.3691043431488" z="0.0" x="-901.950746423649"/>
  </node>
  <node id="148275" label="SLC35B1" cy:nodeId="105798">
    <graphics y="803.8033810084137" z="0.0" x="-150.81877887909332"/>
  </node>
  <node id="148080" label="NRF1" cy:nodeId="107333">
    <graphics y="-785.9488467747894" z="0.0" x="-867.048158533024"/>
  </node>
  <node id="148245" label="ALG3" cy:nodeId="105797">
    <graphics y="795.0962276881012" z="0.0" x="481.625181310726"/>
  </node>
  <node id="148259" label="KHK" cy:nodeId="105800">
    <graphics y="-1142.5461062962738" z="0.0" x="110.05560123260102"/>
  </node>
  <node id="148211" label="DPM1" cy:nodeId="105799">
    <graphics y="1737.3447900836738" z="0.0" x="-1251.9436053103677"/>
  </node>
  <node id="148203" label="FUT1" cy:nodeId="105802">
    <graphics y="334.5780392115387" z="0.0" x="515.2852765255698"/>
  </node>
  <node id="148062" label="RLF" cy:nodeId="107337">
    <graphics y="-1501.4274539525238" z="0.0" x="-128.7052820986978"/>
  </node>
  <node id="148214" label="EBF1" cy:nodeId="105804">
    <graphics y="1716.3325558131012" z="0.0" x="-445.94177425568023"/>
  </node>
  <node id="148053" label="SETDB1" cy:nodeId="107339">
    <graphics y="-934.0368289525238" z="0.0" x="-705.1910418338052"/>
  </node>
  <node id="148216" label="E2F7" cy:nodeId="105803">
    <graphics y="-1254.1704959447113" z="0.0" x="-506.1196001834146"/>
  </node>
  <node id="148270" label="ST3GAL2" cy:nodeId="105806">
    <graphics y="85.72644619396056" z="0.0" x="-332.0862292117349"/>
  </node>
  <node id="148050" label="SMAD1" cy:nodeId="107341">
    <graphics y="176.16757778575743" z="0.0" x="-314.945619470524"/>
  </node>
  <node id="148046" label="SMARCC1" cy:nodeId="107344">
    <graphics y="-1186.54763217518" z="0.0" x="-381.9781664675943"/>
  </node>
  <node id="148047" label="SMARCA4" cy:nodeId="107343">
    <graphics y="-952.5668582493988" z="0.0" x="-1162.403139001774"/>
  </node>
  <node id="148041" label="SP2" cy:nodeId="107346">
    <graphics y="-580.4178714329926" z="0.0" x="-433.4740923709146"/>
  </node>
  <node id="148125" label="TPST1" cy:nodeId="105809">
    <graphics y="1390.7681026881012" z="0.0" x="514.352964513851"/>
  </node>
  <node id="148032" label="STAT6" cy:nodeId="107348">
    <graphics y="-876.2633609349457" z="0.0" x="214.92846500213227"/>
  </node>
  <node id="148126" label="GALNT12" cy:nodeId="105812">
    <graphics y="1412.6803341334137" z="0.0" x="633.4400616818198"/>
  </node>
  <node id="148036" label="STAT3" cy:nodeId="107347">
    <graphics y="-668.8682803685394" z="0.0" x="-165.73223388855376"/>
  </node>
  <node id="148031" label="SVIL" cy:nodeId="107349">
    <graphics y="-1550.8332156712738" z="0.0" x="-315.0658434695474"/>
  </node>
  <node id="148209" label="EGLN2" cy:nodeId="105813">
    <graphics y="424.09323696544493" z="0.0" x="474.462827795101"/>
  </node>
  <node id="148312" label="TPST2" cy:nodeId="106840">
    <graphics y="832.2056026881012" z="0.0" x="675.9063702755698"/>
  </node>
  <node id="148249" label="ST6GALNAC4" cy:nodeId="106839">
    <graphics y="224.06882290294493" z="0.0" x="1273.8520489865073"/>
  </node>
  <node id="148025" label="TERF2" cy:nodeId="107353">
    <graphics y="1550.8959103052887" z="0.0" x="-306.1343249148599"/>
  </node>
  <node id="148128" label="UAP1" cy:nodeId="105820">
    <graphics y="1128.8347530787262" z="0.0" x="170.93047916228852"/>
  </node>
  <node id="148280" label="SLC35E1" cy:nodeId="106844">
    <graphics y="-986.9392947728363" z="0.0" x="-873.2836932009927"/>
  </node>
  <node id="148281" label="BRD4" cy:nodeId="106843">
    <graphics y="-981.8944339329926" z="0.0" x="-486.8385943240396"/>
  </node>
  <node id="148272" label="LFNG" cy:nodeId="106846">
    <graphics y="804.6689815943512" z="0.0" x="1590.1993390255698"/>
  </node>
  <node id="148273" label="CBFA2T3" cy:nodeId="106845">
    <graphics y="741.2613888209137" z="0.0" x="1399.5288067990073"/>
  </node>
  <node id="148220" label="COG6" cy:nodeId="105824">
    <graphics y="370.6455440943512" z="0.0" x="-942.101381189274"/>
  </node>
  <node id="148180" label="COG3" cy:nodeId="105823">
    <graphics y="-662.7033328587738" z="0.0" x="-728.211976892399"/>
  </node>
  <node id="148264" label="CBX6" cy:nodeId="106847">
    <graphics y="-1442.7638797337738" z="0.0" x="-612.937562829899"/>
  </node>
  <node id="148208" label="ELK3" cy:nodeId="105826">
    <graphics y="-203.237070041391" z="0.0" x="-769.3341692752115"/>
  </node>
  <node id="148207" label="EP400" cy:nodeId="105829">
    <graphics y="-902.1789187962738" z="0.0" x="-647.0442217654459"/>
  </node>
  <node id="148262" label="MAN1C1" cy:nodeId="106853">
    <graphics y="-938.2848758275238" z="0.0" x="145.78845035369477"/>
  </node>
  <node id="148204" label="ERG" cy:nodeId="105832">
    <graphics y="45.213872951773055" z="0.0" x="513.5406476193198"/>
  </node>
  <node id="148324" label="FUCA1" cy:nodeId="106856">
    <graphics y="496.8491573756012" z="0.0" x="785.6443463497885"/>
  </node>
  <node id="148261" label="ST6GAL1" cy:nodeId="106855">
    <graphics y="-503.74942966053163" z="0.0" x="290.2870160275229"/>
  </node>
  <node id="148320" label="ST8SIA4" cy:nodeId="105834">
    <graphics y="538.4127560084137" z="0.0" x="728.5560284786948"/>
  </node>
  <node id="148321" label="ST3GAL5" cy:nodeId="106857">
    <graphics y="575.8570919459137" z="0.0" x="931.4835187130698"/>
  </node>
  <node id="148318" label="MGAT4A" cy:nodeId="106860">
    <graphics y="635.3219967310699" z="0.0" x="760.796812170101"/>
  </node>
  <node id="148329" label="UST" cy:nodeId="105836">
    <graphics y="675.8562374537262" z="0.0" x="-1246.6969012088052"/>
  </node>
  <node id="148213" label="CHST7" cy:nodeId="105835">
    <graphics y="1819.0548153345856" z="0.0" x="-482.03027523224273"/>
  </node>
  <node id="148106" label="SULT1C4" cy:nodeId="105837">
    <graphics y="-1339.9818362767426" z="0.0" x="-248.99627865021148"/>
  </node>
  <node id="148198" label="CHST15" cy:nodeId="106861">
    <graphics y="648.2457638209137" z="0.0" x="227.88989078338227"/>
  </node>
  <node id="148176" label="GPI" cy:nodeId="106864">
    <graphics y="1796.9102230494293" z="0.0" x="12.910558813167427"/>
  </node>
  <node id="148177" label="GAPDH" cy:nodeId="106863">
    <graphics y="1716.3325558131012" z="0.0" x="83.98813449676118"/>
  </node>
  <node id="148201" label="ETS1" cy:nodeId="105839">
    <graphics y="468.9801388209137" z="0.0" x="192.01086246306977"/>
  </node>
  <node id="148172" label="GPS2" cy:nodeId="106865">
    <graphics y="718.1025753443512" z="0.0" x="351.161558263851"/>
  </node>
  <node id="148328" label="EXTL2" cy:nodeId="105844">
    <graphics y="531.3451900904449" z="0.0" x="-910.4658221072427"/>
  </node>
  <node id="148165" label="HIF1A" cy:nodeId="106867">
    <graphics y="-1676.4789676243988" z="0.0" x="-504.409730798649"/>
  </node>
  <node id="148195" label="EZH1" cy:nodeId="105846">
    <graphics y="-1150.2514285618988" z="0.0" x="-79.3955019778482"/>
  </node>
  <node id="148090" label="SLC35B4" cy:nodeId="105845">
    <graphics y="65.1753597681793" z="0.0" x="-887.6552141970865"/>
  </node>
  <node id="148189" label="GALC" cy:nodeId="106869">
    <graphics y="562.6582394068512" z="0.0" x="13.869413488460395"/>
  </node>
  <node id="148152" label="IRF3" cy:nodeId="106872">
    <graphics y="703.1728878443512" z="0.0" x="449.170103185726"/>
  </node>
  <node id="148192" label="FLI1" cy:nodeId="105848">
    <graphics y="487.6254024927887" z="0.0" x="587.3723126583823"/>
  </node>
  <node id="148153" label="IRF2" cy:nodeId="106871">
    <graphics y="-590.796380954477" z="0.0" x="377.61315738494477"/>
  </node>
  <node id="148117" label="MAF" cy:nodeId="106876">
    <graphics y="1142.8191280787262" z="0.0" x="663.542661779476"/>
  </node>
  <node id="148174" label="GLCE" cy:nodeId="105851">
    <graphics y="-383.604070621225" z="0.0" x="-426.564271814274"/>
  </node>
  <node id="148104" label="MEF2B" cy:nodeId="106877">
    <graphics y="2131.8876514857084" z="0.0" x="-1052.3767794436685"/>
  </node>
  <node id="148095" label="GNPNAT1" cy:nodeId="105855">
    <graphics y="1419.0445919459137" z="0.0" x="-187.2972010440103"/>
  </node>
  <node id="148183" label="FOXP3" cy:nodeId="105858">
    <graphics y="135.60532192638243" z="0.0" x="1015.7390118771323"/>
  </node>
  <node id="148291" label="GFPT1" cy:nodeId="106882">
    <graphics y="187.72946743419493" z="0.0" x="-585.3394793338052"/>
  </node>
  <node id="148244" label="NPL" cy:nodeId="105860">
    <graphics y="896.9105587427887" z="0.0" x="784.1132794552573"/>
  </node>
  <node id="148247" label="HK3" cy:nodeId="105859">
    <graphics y="569.7864742701324" z="0.0" x="1056.3559552365073"/>
  </node>
  <node id="148051" label="SIRT6" cy:nodeId="106885">
    <graphics y="619.5630855982574" z="0.0" x="441.321958654476"/>
  </node>
  <node id="148182" label="GABPA" cy:nodeId="105861">
    <graphics y="-759.5959720189301" z="0.0" x="-653.5833758181802"/>
  </node>
  <node id="148238" label="ALG13" cy:nodeId="105864">
    <graphics y="-1126.4079227025238" z="0.0" x="-270.17754543487945"/>
  </node>
  <node id="148022" label="THAP11" cy:nodeId="106890">
    <graphics y="1483.0967159693512" z="0.0" x="-394.58836544220367"/>
  </node>
  <node id="148175" label="GLI2" cy:nodeId="105865">
    <graphics y="-126.21503634998476" z="0.0" x="-337.07771480743804"/>
  </node>
  <node id="148218" label="COG4" cy:nodeId="106892">
    <graphics y="1313.8678341334137" z="0.0" x="-216.15034664337554"/>
  </node>
  <node id="148024" label="COG8" cy:nodeId="106891">
    <graphics y="1616.3325558131012" z="0.0" x="-415.91328609650054"/>
  </node>
  <node id="148170" label="H2AFX" cy:nodeId="105872">
    <graphics y="562.6128292506012" z="0.0" x="246.14230167205415"/>
  </node>
  <node id="148206" label="PIGO" cy:nodeId="105874">
    <graphics y="-706.304437595102" z="0.0" x="-812.895082361149"/>
  </node>
  <node id="148168" label="HCFC1" cy:nodeId="105873">
    <graphics y="-823.2044314915863" z="0.0" x="-567.9429949588052"/>
  </node>
  <node id="148160" label="TSTA3" cy:nodeId="105880">
    <graphics y="1819.784154934195" z="0.0" x="-345.94177425568023"/>
  </node>
  <node id="148161" label="HSF1" cy:nodeId="105879">
    <graphics y="1768.0998897974762" z="0.0" x="-252.1287783450357"/>
  </node>
  <node id="148158" label="IKZF1" cy:nodeId="105882">
    <graphics y="412.00021938731993" z="0.0" x="755.6662579708823"/>
  </node>
  <node id="148159" label="GPAA1" cy:nodeId="105881">
    <graphics y="1716.3325558131012" z="0.0" x="-158.16472805206695"/>
  </node>
  <node id="148199" label="LIPA" cy:nodeId="105884">
    <graphics y="810.3862667506012" z="0.0" x="577.1207257443198"/>
  </node>
  <node id="148315" label="GM2A" cy:nodeId="105883">
    <graphics y="634.0528316920074" z="0.0" x="879.1059552365073"/>
  </node>
  <node id="148157" label="INO80" cy:nodeId="105885">
    <graphics y="-1623.0877322728363" z="0.0" x="-656.5334795779459"/>
  </node>
  <node id="148155" label="IRF1" cy:nodeId="105887">
    <graphics y="376.40854458263243" z="0.0" x="1131.5690900021323"/>
  </node>
  <node id="148147" label="IRF8" cy:nodeId="105890">
    <graphics y="712.0576534693512" z="0.0" x="758.4988995724448"/>
  </node>
  <node id="148150" label="IRF5" cy:nodeId="105889">
    <graphics y="552.5221310084137" z="0.0" x="987.1470929318198"/>
  </node>
  <node id="148145" label="JMJD1C" cy:nodeId="105892">
    <graphics y="-555.5923251683441" z="0.0" x="-561.6591204470865"/>
  </node>
  <node id="148146" label="JDP2" cy:nodeId="105891">
    <graphics y="1445.1753292506012" z="0.0" x="174.0467816525229"/>
  </node>
  <node id="148143" label="JMJD6" cy:nodeId="105894">
    <graphics y="-160.0391177708832" z="0.0" x="929.7089825802573"/>
  </node>
  <node id="148144" label="MGAT5" cy:nodeId="105893">
    <graphics y="-731.6811770970551" z="0.0" x="-346.50691402618804"/>
  </node>
  <node id="148316" label="GBGT1" cy:nodeId="105897">
    <graphics y="655.7024898951324" z="0.0" x="946.0887433224448"/>
  </node>
  <node id="148138" label="KAT5" cy:nodeId="105900">
    <graphics y="-1146.2143191868988" z="0.0" x="399.284849279476"/>
  </node>
  <node id="148141" label="JUND" cy:nodeId="105899">
    <graphics y="275.3606319849762" z="0.0" x="596.0375958615073"/>
  </node>
  <node id="148269" label="GNB1" cy:nodeId="105902">
    <graphics y="398.9963741724762" z="0.0" x="-117.68684566681304"/>
  </node>
  <node id="148137" label="KDM1A" cy:nodeId="105901">
    <graphics y="1724.5026279514107" z="0.0" x="-888.2069958514444"/>
  </node>
  <node id="148133" label="KDM5A" cy:nodeId="105904">
    <graphics y="-836.4669742161957" z="0.0" x="-696.631898767399"/>
  </node>
  <node id="148135" label="KDM3A" cy:nodeId="105903">
    <graphics y="-1234.9542483861176" z="0.0" x="-664.1920489138834"/>
  </node>
  <node id="148282" label="B3GALNT2" cy:nodeId="105908">
    <graphics y="-1197.9869021947113" z="0.0" x="-144.58638942902007"/>
  </node>
  <node id="148223" label="DYRK1A" cy:nodeId="120755">
    <graphics y="-561.4082736546723" z="0.0" x="-171.49275339310088"/>
  </node>
  <node id="148122" label="LMO2" cy:nodeId="105909">
    <graphics y="501.0950069849762" z="0.0" x="850.8469220333823"/>
  </node>
  <node id="148173" label="GMEB1" cy:nodeId="120757">
    <graphics y="-1286.8529300267426" z="0.0" x="-1049.9457415408365"/>
  </node>
  <node id="148299" label="RENBP" cy:nodeId="105912">
    <graphics y="372.2501583521637" z="0.0" x="952.3303204708823"/>
  </node>
  <node id="148120" label="LYL1" cy:nodeId="105911">
    <graphics y="455.59555630138243" z="0.0" x="1049.9584942990073"/>
  </node>
  <node id="148116" label="MAFB" cy:nodeId="105914">
    <graphics y="1130.6739864771637" z="0.0" x="847.908628576351"/>
  </node>
  <node id="148148" label="CHST13" cy:nodeId="105913">
    <graphics y="485.44309048106993" z="0.0" x="1116.8823224240073"/>
  </node>
  <node id="148114" label="MAX" cy:nodeId="105915">
    <graphics y="-487.90480228016054" z="0.0" x="494.2029400997885"/>
  </node>
  <node id="148109" label="IDS" cy:nodeId="105922">
    <graphics y="-1014.2873782689301" z="0.0" x="285.04293643767915"/>
  </node>
  <node id="148110" label="MECP2" cy:nodeId="105921">
    <graphics y="-987.7988528783051" z="0.0" x="-58.110200769352105"/>
  </node>
  <node id="148200" label="NDST1" cy:nodeId="105923">
    <graphics y="283.11923794200743" z="0.0" x="-62.24404323761382"/>
  </node>
  <node id="148333" label="NEU1" cy:nodeId="107971">
    <graphics y="1079.3827267115387" z="0.0" x="1196.8471661740073"/>
  </node>
  <node id="148102" label="MEF2C" cy:nodeId="105926">
    <graphics y="-615.9566134984223" z="0.0" x="497.0559674435385"/>
  </node>
  <node id="148105" label="MEF2A" cy:nodeId="105925">
    <graphics y="-1019.0739383275238" z="0.0" x="-211.8853586978189"/>
  </node>
  <node id="148100" label="MEIS1" cy:nodeId="105928">
    <graphics y="2131.8876514857084" z="0.0" x="-1251.9436053103677"/>
  </node>
  <node id="148341" label="PIGX" cy:nodeId="107980">
    <graphics y="-1436.0182742650238" z="0.0" x="-279.7294863528482"/>
  </node>
  <node id="148098" label="MRE11A" cy:nodeId="105931">
    <graphics y="-868.8184451634613" z="0.0" x="-914.9740618533365"/>
  </node>
  <node id="148317" label="CTSA" cy:nodeId="107984">
    <graphics y="712.4418087427887" z="0.0" x="1012.7934552365073"/>
  </node>
  <node id="148118" label="B3GNT8" cy:nodeId="107983">
    <graphics y="417.2793331568512" z="0.0" x="1317.4903546505698"/>
  </node>
  <node id="148092" label="MYH11" cy:nodeId="105937">
    <graphics y="-1211.2516727025238" z="0.0" x="-28.013963586734917"/>
  </node>
  <node id="148219" label="E2F4" cy:nodeId="107987">
    <graphics y="852.5704708521637" z="0.0" x="176.28619205291352"/>
  </node>
  <node id="148123" label="HAS3" cy:nodeId="105941">
    <graphics y="-1569.9584598118988" z="0.0" x="-223.80772960846343"/>
  </node>
  <node id="148088" label="NFYC" cy:nodeId="105946">
    <graphics y="1725.630132717398" z="0.0" x="682.6886120968588"/>
  </node>
  <node id="148089" label="NFIC" cy:nodeId="105945">
    <graphics y="-962.7150516087738" z="0.0" x="-359.05700863068023"/>
  </node>
  <node id="148085" label="NPAT" cy:nodeId="105948">
    <graphics y="-1535.3286990697113" z="0.0" x="-420.66172970001617"/>
  </node>
  <node id="148127" label="HS6ST1" cy:nodeId="107996">
    <graphics y="1272.7442989771637" z="0.0" x="643.6519757443198"/>
  </node>
  <node id="148086" label="NIPBL" cy:nodeId="105947">
    <graphics y="-865.9415225560394" z="0.0" x="-254.78967464630523"/>
  </node>
  <node id="148215" label="SLC35D1" cy:nodeId="105950">
    <graphics y="-1312.5899905736176" z="0.0" x="-444.3920306033365"/>
  </node>
  <node id="148082" label="NR2C2" cy:nodeId="105949">
    <graphics y="-1133.8759402806488" z="0.0" x="-446.29858577911773"/>
  </node>
  <node id="148134" label="KDM4C" cy:nodeId="107997">
    <graphics y="-881.0817508275238" z="0.0" x="-783.2667864627115"/>
  </node>
  <node id="148107" label="PIGM" cy:nodeId="105954">
    <graphics y="-1551.7514285618988" z="0.0" x="-571.674867517399"/>
  </node>
  <node id="148314" label="NANS" cy:nodeId="108002">
    <graphics y="683.7840938990387" z="0.0" x="520.9463483029135"/>
  </node>
  <node id="148079" label="PBX1" cy:nodeId="105953">
    <graphics y="-1273.6083621556488" z="0.0" x="81.0373822384604"/>
  </node>
  <node id="148284" label="SLC35A1" cy:nodeId="108001">
    <graphics y="-1112.5650882298676" z="0.0" x="-128.8719881839029"/>
  </node>
  <node id="148075" label="PHF20" cy:nodeId="105956">
    <graphics y="-1262.2259769017426" z="0.0" x="-584.1036700076334"/>
  </node>
  <node id="148309" label="B3GNT7" cy:nodeId="108004">
    <graphics y="631.3285885279449" z="0.0" x="1149.6198712521323"/>
  </node>
  <node id="148077" label="PCGF1" cy:nodeId="105955">
    <graphics y="1725.630132717398" z="0.0" x="483.1217862301596"/>
  </node>
  <node id="148074" label="PIAS1" cy:nodeId="105958">
    <graphics y="-949.9461307103363" z="0.0" x="-418.698060876774"/>
  </node>
  <node id="148266" label="SLC17A5" cy:nodeId="108005">
    <graphics y="460.33310512950743" z="0.0" x="-436.72281063263335"/>
  </node>
  <node id="148186" label="DAD1" cy:nodeId="108008">
    <graphics y="861.8514767115387" z="0.0" x="395.783384435726"/>
  </node>
  <node id="148072" label="POLR2B" cy:nodeId="105959">
    <graphics y="-1017.8606204564301" z="0.0" x="-441.98291195099273"/>
  </node>
  <node id="148069" label="PRDM1" cy:nodeId="105962">
    <graphics y="920.0442257349762" z="0.0" x="907.2757550411948"/>
  </node>
  <node id="148202" label="CHST1" cy:nodeId="108010">
    <graphics y="-100.76268954822694" z="0.0" x="513.9958478146323"/>
  </node>
  <node id="148071" label="PPARG" cy:nodeId="105961">
    <graphics y="1929.1673336451324" z="0.0" x="-520.7189043826334"/>
  </node>
  <node id="148096" label="MYC" cy:nodeId="108009">
    <graphics y="1217.3439083521637" z="0.0" x="-93.45278347198882"/>
  </node>
</graph>
