# Supplementary material for: A systems-based framework to computationally describe putative transcription factors and signaling pathways regulating glycan biosynthesis
Source: publisher site journal article supplement (doi:10.3762/bjoc.17.119), 2021-07-22
Supplement: Additional file 2 [file 1860-5397-17-119-S2.cys › CytoscapeSession-2021_03_21-12_01/views/122667-129845-SKCM.xgmml]

<?xml version="1.0" encoding="UTF-8" standalone="yes"?>
<graph id="129845" label="SKCM" cy:view="1" cy:networkId="122667" cy:visualStyle="default" cy:rendererId="org.cytoscape.ding" cy:documentVersion="3.0" xmlns:dc="http://purl.org/dc/elements/1.1/" xmlns:xlink="http://www.w3.org/1999/xlink" xmlns:rdf="http://www.w3.org/1999/02/22-rdf-syntax-ns#" xmlns:cy="http://www.cytoscape.org" xmlns="http://www.cs.rpi.edu/XGMML">
  <graphics>
    <att name="NETWORK_NODE_SELECTION" value="true" type="string" cy:type="String"/>
    <att name="NETWORK_CENTER_X_LOCATION" value="111.76620483398438" type="string" cy:type="String"/>
    <att name="NETWORK_HEIGHT" value="510.0" type="string" cy:type="String"/>
    <att name="NETWORK_TITLE" value="SKCM" type="string" cy:type="String"/>
    <att name="NETWORK_EDGE_SELECTION" value="true" type="string" cy:type="String"/>
    <att name="NETWORK_CENTER_Y_LOCATION" value="-251.3018798828125" type="string" cy:type="String"/>
    <att name="NETWORK_WIDTH" value="1312.0" type="string" cy:type="String"/>
    <att name="NETWORK_DEPTH" value="0.0" type="string" cy:type="String"/>
    <att name="NETWORK_SCALE_FACTOR" value="0.10649449271300229" type="string" cy:type="String"/>
    <att name="NETWORK_ANNOTATION_SELECTION" value="false" type="string" cy:type="String"/>
    <att name="NETWORK_CENTER_Z_LOCATION" value="0.0" type="string" cy:type="String"/>
  </graphics>
  <node id="129893" label="RBL2" cy:nodeId="105968">
    <graphics y="-677.5401744409505" z="0.0" x="-160.63383007813718"/>
  </node>
  <node id="129895" label="RBBP5" cy:nodeId="105967">
    <graphics y="-1319.74798770389" z="0.0" x="-230.27447224427488"/>
  </node>
  <node id="129888" label="REST" cy:nodeId="105970">
    <graphics y="-1370.1164760156576" z="0.0" x="-146.80959797669675"/>
  </node>
  <node id="129892" label="RCOR1" cy:nodeId="105969">
    <graphics y="-2009.6908702417318" z="0.0" x="-157.39665318299558"/>
  </node>
  <node id="129945" label="PIGB" cy:nodeId="108020">
    <graphics y="-2327.362012819857" z="0.0" x="863.036906234729"/>
  </node>
  <node id="129887" label="RFX7" cy:nodeId="105974">
    <graphics y="-1665.279554323763" z="0.0" x="40.387827865588406"/>
  </node>
  <node id="129894" label="COG2" cy:nodeId="105973">
    <graphics y="-1435.5844096704427" z="0.0" x="-598.9907426910522"/>
  </node>
  <node id="129890" label="RELA" cy:nodeId="108024">
    <graphics y="1489.1787052587565" z="0.0" x="-574.312474258435"/>
  </node>
  <node id="129984" label="FPGT" cy:nodeId="105976">
    <graphics y="-601.4483165307943" z="0.0" x="-246.4386110382202"/>
  </node>
  <node id="129884" label="RNF2" cy:nodeId="105975">
    <graphics y="-1120.6393260522786" z="0.0" x="-506.1281633453491"/>
  </node>
  <node id="130024" label="POMT2" cy:nodeId="108023">
    <graphics y="-2054.785840944857" z="0.0" x="-76.51990223695066"/>
  </node>
  <node id="129883" label="RUNX1" cy:nodeId="105978">
    <graphics y="450.39463238277995" z="0.0" x="542.3682088775513"/>
  </node>
  <node id="129847" label="PIGA" cy:nodeId="108027">
    <graphics y="-562.7794322534505" z="0.0" x="-584.6396989898803"/>
  </node>
  <node id="130001" label="SULF2" cy:nodeId="105979">
    <graphics y="213.98906139889323" z="0.0" x="799.4112043304322"/>
  </node>
  <node id="129997" label="HS3ST3A1" cy:nodeId="108033">
    <graphics y="326.2544117406901" z="0.0" x="770.4342451019165"/>
  </node>
  <node id="130072" label="UGCG" cy:nodeId="105985">
    <graphics y="-1636.035413698763" z="0.0" x="322.5905561370728"/>
  </node>
  <node id="129921" label="MXI1" cy:nodeId="111108">
    <graphics y="-2294.478956179232" z="0.0" x="529.390177719104"/>
  </node>
  <node id="129880" label="SMAD4" cy:nodeId="105987">
    <graphics y="-817.6074962182943" z="0.0" x="181.6676130218384"/>
  </node>
  <node id="129878" label="SMC3" cy:nodeId="105990">
    <graphics y="-1016.734876589388" z="0.0" x="-41.263485916149875"/>
  </node>
  <node id="130048" label="GCNT1" cy:nodeId="108552">
    <graphics y="476.82856945553385" z="0.0" x="-333.9913530426147"/>
  </node>
  <node id="129852" label="ALG9" cy:nodeId="108554">
    <graphics y="1859.2031574682292" z="0.0" x="-528.8518114166382"/>
  </node>
  <node id="129889" label="GANAB" cy:nodeId="105998">
    <graphics y="1611.515040679365" z="0.0" x="-499.52844715882566"/>
  </node>
  <node id="129875" label="SSRP1" cy:nodeId="105997">
    <graphics y="1601.0168891386088" z="0.0" x="-381.6969652252319"/>
  </node>
  <node id="129874" label="STAT1" cy:nodeId="105999">
    <graphics y="446.8736057714518" z="0.0" x="-436.83736134339597"/>
  </node>
  <node id="129916" label="GALE" cy:nodeId="108559">
    <graphics y="1959.2031574682292" z="0.0" x="630.2444333953736"/>
  </node>
  <node id="129872" label="STAT4" cy:nodeId="106002">
    <graphics y="560.5968914465006" z="0.0" x="-97.78621388245847"/>
  </node>
  <node id="129873" label="STAT2" cy:nodeId="106001">
    <graphics y="349.48230175533854" z="0.0" x="-766.723347671521"/>
  </node>
  <node id="129869" label="TAF1" cy:nodeId="106006">
    <graphics y="-840.1622752710286" z="0.0" x="-141.39252854157712"/>
  </node>
  <node id="129940" label="COG1" cy:nodeId="106005">
    <graphics y="1959.2031574682292" z="0.0" x="-168.0228700714233"/>
  </node>
  <node id="129864" label="TCF7" cy:nodeId="106008">
    <graphics y="615.9055576757487" z="0.0" x="65.75736521910403"/>
  </node>
  <node id="129866" label="TCF12" cy:nodeId="106007">
    <graphics y="-551.5098399682943" z="0.0" x="230.9084577484009"/>
  </node>
  <node id="129991" label="ALG5" cy:nodeId="106012">
    <graphics y="-364.592054323763" z="0.0" x="-16.594006546032688"/>
  </node>
  <node id="129885" label="SLC35B2" cy:nodeId="108572">
    <graphics y="2068.500734372526" z="0.0" x="31.543955795275906"/>
  </node>
  <node id="129879" label="GALNT1" cy:nodeId="106014">
    <graphics y="-732.8358287378255" z="0.0" x="396.1611127776978"/>
  </node>
  <node id="129863" label="TEAD1" cy:nodeId="106013">
    <graphics y="-1150.6148967309896" z="0.0" x="-60.082509048474094"/>
  </node>
  <node id="129858" label="TTF2" cy:nodeId="106019">
    <graphics y="-1425.168714480013" z="0.0" x="-20.902020462048313"/>
  </node>
  <node id="129854" label="WDR5" cy:nodeId="106024">
    <graphics y="976.4722767309245" z="0.0" x="607.2354612274048"/>
  </node>
  <node id="129855" label="VEZF1" cy:nodeId="106023">
    <graphics y="-879.730237917513" z="0.0" x="-277.24704457093503"/>
  </node>
  <node id="129853" label="YAP1" cy:nodeId="106026">
    <graphics y="1745.375246091276" z="0.0" x="-520.4217577057007"/>
  </node>
  <node id="129851" label="ZBTB17" cy:nodeId="106029">
    <graphics y="1166.9738026098307" z="0.0" x="411.9859418792603"/>
  </node>
  <node id="129848" label="ZBTB33" cy:nodeId="106031">
    <graphics y="-649.521741823763" z="0.0" x="-403.52824879456784"/>
  </node>
  <node id="129861" label="TFAP2A" cy:nodeId="118340">
    <graphics y="-2113.003187136263" z="0.0" x="723.8949994964478"/>
  </node>
  <node id="129886" label="RING1" cy:nodeId="108613">
    <graphics y="2077.798311276823" z="0.0" x="131.11078166197512"/>
  </node>
  <node id="129977" label="CHST4" cy:nodeId="113221">
    <graphics y="39.6538258031901" z="0.0" x="-291.60420704652097"/>
  </node>
  <node id="129881" label="SFMBT1" cy:nodeId="108615">
    <graphics y="-1404.9552669092122" z="0.0" x="253.26386546324466"/>
  </node>
  <node id="129871" label="SUPT5H" cy:nodeId="108622">
    <graphics y="2077.798311276823" z="0.0" x="330.67760752867434"/>
  </node>
  <node id="130012" label="GLB1" cy:nodeId="109675">
    <graphics y="-1786.1741160913411" z="0.0" x="200.50040721129153"/>
  </node>
  <node id="130041" label="BTAF1" cy:nodeId="110789">
    <graphics y="-767.9765147729818" z="0.0" x="-589.9110612945678"/>
  </node>
  <node id="129989" label="ESRRA" cy:nodeId="110794">
    <graphics y="1231.531236691862" z="0.0" x="-638.1734056549194"/>
  </node>
  <node id="130080" label="ADNP" cy:nodeId="105684">
    <graphics y="68.29362682858073" z="0.0" x="-181.01192189027097"/>
  </node>
  <node id="130078" label="AFF4" cy:nodeId="105686">
    <graphics y="-1340.375516848177" z="0.0" x="106.93467234801028"/>
  </node>
  <node id="130079" label="FUT7" cy:nodeId="105685">
    <graphics y="300.39590649166666" z="0.0" x="-140.30727101136472"/>
  </node>
  <node id="130076" label="STT3B" cy:nodeId="105688">
    <graphics y="-1376.6083659692708" z="0.0" x="48.38279246519778"/>
  </node>
  <node id="129912" label="NR1H3" cy:nodeId="110807">
    <graphics y="861.1252918676432" z="0.0" x="-382.9745073394897"/>
  </node>
  <node id="130077" label="MAN1A2" cy:nodeId="105687">
    <graphics y="-1095.2142467065755" z="0.0" x="41.696360580432156"/>
  </node>
  <node id="130074" label="FUT11" cy:nodeId="105690">
    <graphics y="-1165.5323009057943" z="0.0" x="-159.90363980103757"/>
  </node>
  <node id="130075" label="NEU3" cy:nodeId="105689">
    <graphics y="-1599.6357860132161" z="0.0" x="-54.809750564587375"/>
  </node>
  <node id="129877" label="SND1" cy:nodeId="110812">
    <graphics y="1968.500734372526" z="0.0" x="-467.58969593812253"/>
  </node>
  <node id="129966" label="COG5" cy:nodeId="105692">
    <graphics y="1968.500734372526" z="0.0" x="131.11078166197512"/>
  </node>
  <node id="130069" label="ACER2" cy:nodeId="105691">
    <graphics y="-1266.9713420434896" z="0.0" x="-379.7979936676147"/>
  </node>
  <node id="130073" label="MAN2A1" cy:nodeId="105694">
    <graphics y="-1187.4739665552083" z="0.0" x="155.21763133238528"/>
  </node>
  <node id="130070" label="SLC35F5" cy:nodeId="105696">
    <graphics y="-881.072523073763" z="0.0" x="322.34357737730716"/>
  </node>
  <node id="130067" label="SLC35A3" cy:nodeId="105695">
    <graphics y="-628.465589480013" z="0.0" x="-100.61885548402097"/>
  </node>
  <node id="129947" label="ST8SIA6" cy:nodeId="105698">
    <graphics y="-2436.235059694857" z="0.0" x="712.6249189300415"/>
  </node>
  <node id="129953" label="RTF1" cy:nodeId="105700">
    <graphics y="-329.749769167513" z="0.0" x="393.1916303558228"/>
  </node>
  <node id="129914" label="SLC35A5" cy:nodeId="105702">
    <graphics y="-413.9930553003255" z="0.0" x="-426.33797169495847"/>
  </node>
  <node id="130071" label="ATF2" cy:nodeId="105704">
    <graphics y="-959.9927501245443" z="0.0" x="56.51127146910403"/>
  </node>
  <node id="130063" label="GALNT4" cy:nodeId="105703">
    <graphics y="-928.4928111597005" z="0.0" x="205.93320750426028"/>
  </node>
  <node id="130068" label="UGGT1" cy:nodeId="105705">
    <graphics y="-1001.936780886263" z="0.0" x="291.31659983824466"/>
  </node>
  <node id="130062" label="ATF7IP" cy:nodeId="105710">
    <graphics y="-801.3743114038411" z="0.0" x="-332.09619618226316"/>
  </node>
  <node id="130059" label="ATRX" cy:nodeId="105712">
    <graphics y="-565.8141612573568" z="0.0" x="78.70234202574466"/>
  </node>
  <node id="130061" label="ALG10" cy:nodeId="105711">
    <graphics y="-856.0088939233724" z="0.0" x="-412.2956438140991"/>
  </node>
  <node id="130022" label="MAN1A1" cy:nodeId="105716">
    <graphics y="680.7820454076823" z="0.0" x="-38.21211720277097"/>
  </node>
  <node id="130029" label="CSGALNACT2" cy:nodeId="105715">
    <graphics y="-1066.1431254907552" z="0.0" x="598.6630048675415"/>
  </node>
  <node id="130058" label="BATF" cy:nodeId="105721">
    <graphics y="341.59504894772135" z="0.0" x="-363.1898393707397"/>
  </node>
  <node id="130052" label="BATF3" cy:nodeId="105723">
    <graphics y="311.0169544652995" z="0.0" x="-260.51082325745847"/>
  </node>
  <node id="130047" label="BMI1" cy:nodeId="105726">
    <graphics y="-710.384290651888" z="0.0" x="217.5109968109009"/>
  </node>
  <node id="130049" label="BCAT1" cy:nodeId="105725">
    <graphics y="295.0969410375651" z="0.0" x="-512.8353471832397"/>
  </node>
  <node id="130046" label="BRCA1" cy:nodeId="105728">
    <graphics y="-886.2623118921224" z="0.0" x="-614.1028337555053"/>
  </node>
  <node id="130060" label="ALG10B" cy:nodeId="105727">
    <graphics y="-807.2373790307943" z="0.0" x="-47.745450027478"/>
  </node>
  <node id="129918" label="PIGN" cy:nodeId="105730">
    <graphics y="2068.500734372526" z="0.0" x="-766.723347671521"/>
  </node>
  <node id="130020" label="FAM20B" cy:nodeId="105731">
    <graphics y="-1171.6404170556966" z="0.0" x="-273.98727894593503"/>
  </node>
  <node id="130044" label="ALG12" cy:nodeId="105734">
    <graphics y="2077.798311276823" z="0.0" x="-467.58969593812253"/>
  </node>
  <node id="130045" label="BRD1" cy:nodeId="105733">
    <graphics y="2068.500734372526" z="0.0" x="-567.1565218048218"/>
  </node>
  <node id="129856" label="B4GALT1" cy:nodeId="107274">
    <graphics y="1959.2031574682292" z="0.0" x="430.67760752867434"/>
  </node>
  <node id="130040" label="CASP8AP2" cy:nodeId="105738">
    <graphics y="-855.9999827905599" z="0.0" x="61.09539317320559"/>
  </node>
  <node id="130018" label="RFNG" cy:nodeId="105744">
    <graphics y="2068.500734372526" z="0.0" x="-168.0228700714233"/>
  </node>
  <node id="130032" label="ST6GALNAC6" cy:nodeId="105746">
    <graphics y="490.2172394231852" z="0.0" x="192.01102732847903"/>
  </node>
  <node id="130009" label="SLC35B3" cy:nodeId="107281">
    <graphics y="-488.1270885034505" z="0.0" x="-238.44616413880613"/>
  </node>
  <node id="129987" label="ALG8" cy:nodeId="107286">
    <graphics y="1115.2064686254557" z="0.0" x="-638.9110155182007"/>
  </node>
  <node id="130039" label="CBX8" cy:nodeId="105752">
    <graphics y="1276.3638782934245" z="0.0" x="605.949992172229"/>
  </node>
  <node id="129988" label="B3GAT3" cy:nodeId="105754">
    <graphics y="1368.8269367651042" z="0.0" x="-648.7308702545288"/>
  </node>
  <node id="130013" label="ASAH1" cy:nodeId="107290">
    <graphics y="-1794.811048464388" z="0.0" x="326.2817182464478"/>
  </node>
  <node id="130038" label="GALK1" cy:nodeId="105753">
    <graphics y="1195.7841358617839" z="0.0" x="677.0252790374634"/>
  </node>
  <node id="130036" label="CDK8" cy:nodeId="105756">
    <graphics y="-1242.2245463891927" z="0.0" x="33.12003611754153"/>
  </node>
  <node id="130034" label="DPM2" cy:nodeId="105758">
    <graphics y="865.7950611547526" z="0.0" x="634.4449109954712"/>
  </node>
  <node id="129903" label="HK1" cy:nodeId="107293">
    <graphics y="-1751.934827761263" z="0.0" x="-447.0554399566772"/>
  </node>
  <node id="130035" label="CDK9" cy:nodeId="105757">
    <graphics y="798.5512257055339" z="0.0" x="457.3156194610474"/>
  </node>
  <node id="129946" label="GCNT2" cy:nodeId="107296">
    <graphics y="-2077.872816042513" z="0.0" x="619.8780927581665"/>
  </node>
  <node id="130033" label="MAN1B1" cy:nodeId="105760">
    <graphics y="982.4666920141276" z="0.0" x="492.41197013090823"/>
  </node>
  <node id="129850" label="MOGS" cy:nodeId="105762">
    <graphics y="1218.6580677465495" z="0.0" x="318.17294596861575"/>
  </node>
  <node id="130031" label="POMT1" cy:nodeId="105761">
    <graphics y="887.3731251195964" z="0.0" x="533.5330266876099"/>
  </node>
  <node id="130053" label="CHST12" cy:nodeId="105763">
    <graphics y="206.67903332272135" z="0.0" x="-235.52736378480222"/>
  </node>
  <node id="129994" label="MFNG" cy:nodeId="105766">
    <graphics y="539.9430027441081" z="0.0" x="-13.106984146130344"/>
  </node>
  <node id="130057" label="NAGK" cy:nodeId="105765">
    <graphics y="511.8987932638224" z="0.0" x="-407.97969532777097"/>
  </node>
  <node id="129998" label="A4GALT" cy:nodeId="105768">
    <graphics y="399.7244129613932" z="0.0" x="859.2047223968384"/>
  </node>
  <node id="130028" label="CHD2" cy:nodeId="105770">
    <graphics y="-744.634046511263" z="0.0" x="-85.90027333070066"/>
  </node>
  <node id="129922" label="GNPDA1" cy:nodeId="107305">
    <graphics y="-2018.2193126245443" z="0.0" x="406.18424510191653"/>
  </node>
  <node id="130030" label="CHD1" cy:nodeId="105769">
    <graphics y="-1080.5285167261068" z="0.0" x="419.3022260589478"/>
  </node>
  <node id="129958" label="NDST2" cy:nodeId="105772">
    <graphics y="737.7270832494792" z="0.0" x="-128.12947560120847"/>
  </node>
  <node id="130027" label="OGT" cy:nodeId="105771">
    <graphics y="-743.7676524682943" z="0.0" x="-200.28912068177488"/>
  </node>
  <node id="129955" label="NAAA" cy:nodeId="107310">
    <graphics y="696.432115598112" z="0.0" x="-224.72951222230222"/>
  </node>
  <node id="130026" label="CHD8" cy:nodeId="105774">
    <graphics y="-1917.193860964388" z="0.0" x="-143.76937199403073"/>
  </node>
  <node id="129939" label="KAT2B" cy:nodeId="107312">
    <graphics y="2077.798311276823" z="0.0" x="-268.0228700714233"/>
  </node>
  <node id="130055" label="LAMP3" cy:nodeId="105776">
    <graphics y="422.3170872167643" z="0.0" x="-280.82356739808347"/>
  </node>
  <node id="129942" label="JARID2" cy:nodeId="107311">
    <graphics y="-1706.9960460229818" z="0.0" x="-225.41150379945066"/>
  </node>
  <node id="130023" label="CIITA" cy:nodeId="105775">
    <graphics y="382.053209348112" z="0.0" x="-210.61269093323972"/>
  </node>
  <node id="129930" label="MAN2B1" cy:nodeId="105777">
    <graphics y="182.92912487545573" z="0.0" x="194.10886668394778"/>
  </node>
  <node id="130019" label="CPSF3L" cy:nodeId="105780">
    <graphics y="2077.798311276823" z="0.0" x="-68.4560442047241"/>
  </node>
  <node id="129956" label="DSE" cy:nodeId="105779">
    <graphics y="834.8416004613932" z="0.0" x="-238.15193653870847"/>
  </node>
  <node id="129902" label="POLR3G" cy:nodeId="122678">
    <graphics y="-360.4358653589193" z="0.0" x="-312.48970509339597"/>
  </node>
  <node id="129971" label="GREB1" cy:nodeId="122677">
    <graphics y="-2580.402051882357" z="0.0" x="956.6686201019165"/>
  </node>
  <node id="129932" label="LIN9" cy:nodeId="107321">
    <graphics y="-677.8560924097005" z="0.0" x="124.20051097105716"/>
  </node>
  <node id="130017" label="CREB3L4" cy:nodeId="105788">
    <graphics y="1276.3638782934245" z="0.0" x="848.1028547210572"/>
  </node>
  <node id="129849" label="GMPPA" cy:nodeId="105787">
    <graphics y="1115.2064686254557" z="0.0" x="505.94999217222903"/>
  </node>
  <node id="130015" label="CREBBP" cy:nodeId="105790">
    <graphics y="-1799.2720775171224" z="0.0" x="23.90256785582278"/>
  </node>
  <node id="129924" label="MEF2D" cy:nodeId="107325">
    <graphics y="1115.2064686254557" z="0.0" x="990.2557172698853"/>
  </node>
  <node id="130016" label="B4GALT3" cy:nodeId="105789">
    <graphics y="1195.7841358617839" z="0.0" x="919.1781415862915"/>
  </node>
  <node id="130002" label="PAPSS2" cy:nodeId="107328">
    <graphics y="215.4091968969401" z="0.0" x="660.9523115081665"/>
  </node>
  <node id="130014" label="CTNNB1" cy:nodeId="105794">
    <graphics y="-1645.4507274194661" z="0.0" x="181.42743968199466"/>
  </node>
  <node id="129919" label="NFYA" cy:nodeId="107329">
    <graphics y="2077.798311276823" z="0.0" x="-667.1565218048218"/>
  </node>
  <node id="129948" label="PIGY" cy:nodeId="107332">
    <graphics y="-2172.6663951440755" z="0.0" x="585.8705243987915"/>
  </node>
  <node id="130010" label="DEK" cy:nodeId="105795">
    <graphics y="-702.5977916284505" z="0.0" x="-281.74191761781003"/>
  </node>
  <node id="129910" label="PHF8" cy:nodeId="107334">
    <graphics y="-1717.6162852807943" z="0.0" x="-59.513546951306125"/>
  </node>
  <node id="129908" label="PML" cy:nodeId="107336">
    <graphics y="507.96685223141276" z="0.0" x="-615.236287124646"/>
  </node>
  <node id="129876" label="SLC35A2" cy:nodeId="107335">
    <graphics y="1959.2031574682292" z="0.0" x="-567.1565218048218"/>
  </node>
  <node id="130003" label="EBF1" cy:nodeId="105804">
    <graphics y="361.79336742916666" z="0.0" x="656.1024122161743"/>
  </node>
  <node id="129882" label="SETDB1" cy:nodeId="107339">
    <graphics y="-1487.6134624048177" z="0.0" x="-766.723347671521"/>
  </node>
  <node id="130004" label="ST3GAL2" cy:nodeId="105806">
    <graphics y="1115.2064686254557" z="0.0" x="-69.60410023499753"/>
  </node>
  <node id="129995" label="EGR2" cy:nodeId="105816">
    <graphics y="583.4290256933268" z="0.0" x="160.31034373472903"/>
  </node>
  <node id="129868" label="TAF3" cy:nodeId="107351">
    <graphics y="-1050.1797771020833" z="0.0" x="-364.56367970277097"/>
  </node>
  <node id="129979" label="ST6GALNAC4" cy:nodeId="106839">
    <graphics y="320.05508617916666" z="0.0" x="97.76267527769778"/>
  </node>
  <node id="129865" label="B3GALT1" cy:nodeId="105818">
    <graphics y="-478.6790294214193" z="0.0" x="378.79288768004153"/>
  </node>
  <node id="129862" label="TERF2" cy:nodeId="107353">
    <graphics y="1308.516800327688" z="0.0" x="-281.6969652252319"/>
  </node>
  <node id="129857" label="VDR" cy:nodeId="107356">
    <graphics y="1968.500734372526" z="0.0" x="530.2444333953736"/>
  </node>
  <node id="130042" label="SLC35E1" cy:nodeId="106844">
    <graphics y="-1372.7943553491536" z="0.0" x="-405.8717241363647"/>
  </node>
  <node id="130043" label="BRD4" cy:nodeId="106843">
    <graphics y="-1496.0580577417318" z="0.0" x="-503.1456499176147"/>
  </node>
  <node id="129978" label="LFNG" cy:nodeId="106846">
    <graphics y="270.1659870580729" z="0.0" x="-38.52193165589597"/>
  </node>
  <node id="129992" label="ELF1" cy:nodeId="105822">
    <graphics y="-527.659681276888" z="0.0" x="-90.81758976746823"/>
  </node>
  <node id="130037" label="CDK12" cy:nodeId="106848">
    <graphics y="-1301.0679606958333" z="0.0" x="-550.5866594390991"/>
  </node>
  <node id="130066" label="COG6" cy:nodeId="105824">
    <graphics y="-609.6419200464193" z="0.0" x="-3.8436937408569065"/>
  </node>
  <node id="130065" label="COG3" cy:nodeId="105823">
    <graphics y="-748.1224498315755" z="0.0" x="42.82566355894778"/>
  </node>
  <node id="130011" label="DCP1A" cy:nodeId="106850">
    <graphics y="-1490.0330638452474" z="0.0" x="154.34516429136966"/>
  </node>
  <node id="130021" label="CLOCK" cy:nodeId="106849">
    <graphics y="-1092.18504138431" z="0.0" x="-259.4016084747436"/>
  </node>
  <node id="129990" label="ELK4" cy:nodeId="105827">
    <graphics y="-1162.2930125757161" z="0.0" x="-373.41438771058347"/>
  </node>
  <node id="129981" label="MAN1C1" cy:nodeId="106853">
    <graphics y="142.6223316625651" z="0.0" x="50.217295639025906"/>
  </node>
  <node id="130056" label="FUCA1" cy:nodeId="106856">
    <graphics y="481.70874790707194" z="0.0" x="-216.12111378480222"/>
  </node>
  <node id="129975" label="ST6GAL1" cy:nodeId="106855">
    <graphics y="1968.500734372526" z="0.0" x="-667.1565218048218"/>
  </node>
  <node id="130050" label="ST8SIA4" cy:nodeId="105834">
    <graphics y="529.726585431486" z="0.0" x="-168.70399952698972"/>
  </node>
  <node id="129938" label="ST3GAL5" cy:nodeId="106857">
    <graphics y="2068.500734372526" z="0.0" x="-367.58969593812253"/>
  </node>
  <node id="129982" label="MGAT4A" cy:nodeId="106860">
    <graphics y="611.5496082738932" z="0.0" x="-167.97481251527097"/>
  </node>
  <node id="129993" label="CHST15" cy:nodeId="106861">
    <graphics y="498.7665298418101" z="0.0" x="55.923716537463406"/>
  </node>
  <node id="129870" label="GPI" cy:nodeId="106864">
    <graphics y="2068.500734372526" z="0.0" x="231.11078166197512"/>
  </node>
  <node id="129986" label="ETS1" cy:nodeId="105839">
    <graphics y="-1654.1695384546224" z="0.0" x="484.9017133636353"/>
  </node>
  <node id="129972" label="GPS2" cy:nodeId="106865">
    <graphics y="1115.2064686254557" z="0.0" x="748.1028547210572"/>
  </node>
  <node id="129996" label="HS3ST3B1" cy:nodeId="105841">
    <graphics y="535.8881931737956" z="0.0" x="291.2492017669556"/>
  </node>
  <node id="130025" label="MGAT2" cy:nodeId="106868">
    <graphics y="-2077.614454226107" z="0.0" x="-262.4203310089233"/>
  </node>
  <node id="130064" label="EXTL2" cy:nodeId="105844">
    <graphics y="-1032.9766063257161" z="0.0" x="154.01410960386966"/>
  </node>
  <node id="129985" label="EZH1" cy:nodeId="105846">
    <graphics y="-570.3153819604818" z="0.0" x="-339.9685258941772"/>
  </node>
  <node id="129950" label="IRF3" cy:nodeId="106872">
    <graphics y="31.668657346158852" z="0.0" x="-57.51192189027097"/>
  </node>
  <node id="129983" label="FLI1" cy:nodeId="105848">
    <graphics y="364.8851948217448" z="0.0" x="-91.71986866761472"/>
  </node>
  <node id="129951" label="IRF2" cy:nodeId="106871">
    <graphics y="568.8170338110026" z="0.0" x="-356.94759083558347"/>
  </node>
  <node id="129936" label="KDM4A" cy:nodeId="106874">
    <graphics y="1968.500734372526" z="0.0" x="929.378085128772"/>
  </node>
  <node id="129925" label="MEF2B" cy:nodeId="106877">
    <graphics y="-113.03791614016927" z="0.0" x="-358.9687700348022"/>
  </node>
  <node id="129901" label="POU2F2" cy:nodeId="106880">
    <graphics y="878.1161060766276" z="0.0" x="-93.81618214417722"/>
  </node>
  <node id="129976" label="FOXO1" cy:nodeId="105856">
    <graphics y="1959.2031574682292" z="0.0" x="-766.723347671521"/>
  </node>
  <node id="129891" label="GNPNAT1" cy:nodeId="105855">
    <graphics y="-2196.1016368432943" z="0.0" x="-148.84955406953122"/>
  </node>
  <node id="129899" label="GFPT1" cy:nodeId="106882">
    <graphics y="2077.798311276823" z="0.0" x="729.8112592620728"/>
  </node>
  <node id="129974" label="FOXP3" cy:nodeId="105858">
    <graphics y="453.4132709936198" z="0.0" x="-90.63704396058347"/>
  </node>
  <node id="129900" label="PPARA" cy:nodeId="106881">
    <graphics y="2068.500734372526" z="0.0" x="630.2444333953736"/>
  </node>
  <node id="129999" label="SULF1" cy:nodeId="106883">
    <graphics y="367.13220409908854" z="0.0" x="466.4580020828125"/>
  </node>
  <node id="130051" label="HK3" cy:nodeId="105859">
    <graphics y="421.1993580297526" z="0.0" x="-150.06599903870847"/>
  </node>
  <node id="129973" label="GABPA" cy:nodeId="105861">
    <graphics y="-673.3643931909505" z="0.0" x="-40.35416127015378"/>
  </node>
  <node id="129859" label="THAP11" cy:nodeId="106890">
    <graphics y="1222.7864612773951" z="0.0" x="-101.01559925843503"/>
  </node>
  <node id="129867" label="TBX21" cy:nodeId="106889">
    <graphics y="157.16832165279948" z="0.0" x="-95.06783009339597"/>
  </node>
  <node id="129969" label="GTF2B" cy:nodeId="105868">
    <graphics y="1959.2031574682292" z="0.0" x="-367.58969593812253"/>
  </node>
  <node id="130006" label="COG4" cy:nodeId="106892">
    <graphics y="1207.479042454153" z="0.0" x="-244.41248036195066"/>
  </node>
  <node id="130005" label="COG8" cy:nodeId="106891">
    <graphics y="1287.1682132915553" z="0.0" x="-171.6660814361694"/>
  </node>
  <node id="129965" label="H2AFX" cy:nodeId="105872">
    <graphics y="1959.2031574682292" z="0.0" x="231.11078166197512"/>
  </node>
  <node id="129967" label="GTF2I" cy:nodeId="105871">
    <graphics y="1959.2031574682292" z="0.0" x="31.543955795275906"/>
  </node>
  <node id="129963" label="HCFC1" cy:nodeId="105873">
    <graphics y="-1781.1414622827474" z="0.0" x="-142.26595736314084"/>
  </node>
  <node id="129964" label="DPAGT1" cy:nodeId="105878">
    <graphics y="1968.500734372526" z="0.0" x="330.67760752867434"/>
  </node>
  <node id="129961" label="TSTA3" cy:nodeId="105880">
    <graphics y="1218.6580677465495" z="0.0" x="30.39589976500247"/>
  </node>
  <node id="129962" label="HSF1" cy:nodeId="105879">
    <graphics y="1166.9738026098307" z="0.0" x="124.208895675647"/>
  </node>
  <node id="129959" label="IKZF1" cy:nodeId="105882">
    <graphics y="583.1907062963542" z="0.0" x="-237.76753712464597"/>
  </node>
  <node id="129960" label="GPAA1" cy:nodeId="105881">
    <graphics y="1115.2064686254557" z="0.0" x="218.17294596861575"/>
  </node>
  <node id="129957" label="LIPA" cy:nodeId="105884">
    <graphics y="636.4039936498698" z="0.0" x="-425.3111772613647"/>
  </node>
  <node id="130054" label="GM2A" cy:nodeId="105883">
    <graphics y="392.4402790502604" z="0.0" x="-598.800984390271"/>
  </node>
  <node id="129954" label="INO80" cy:nodeId="105885">
    <graphics y="-213.03791614016927" z="0.0" x="487.93253611754153"/>
  </node>
  <node id="129949" label="IRF4" cy:nodeId="105888">
    <graphics y="-2303.5228404565755" z="0.0" x="732.0976362151978"/>
  </node>
  <node id="129952" label="IRF1" cy:nodeId="105887">
    <graphics y="517.1820116476115" z="0.0" x="-280.31917286683347"/>
  </node>
  <node id="129943" label="IRF8" cy:nodeId="105890">
    <graphics y="636.6008778051432" z="0.0" x="-282.02241993714597"/>
  </node>
  <node id="129944" label="IRF5" cy:nodeId="105889">
    <graphics y="419.4359989599284" z="0.0" x="-43.23878956605222"/>
  </node>
  <node id="129941" label="JMJD6" cy:nodeId="105894">
    <graphics y="1968.500734372526" z="0.0" x="-68.4560442047241"/>
  </node>
  <node id="129904" label="MGAT5" cy:nodeId="105893">
    <graphics y="-1687.9305553003255" z="0.0" x="-549.4946489410522"/>
  </node>
  <node id="129980" label="GBGT1" cy:nodeId="105897">
    <graphics y="423.65893749752604" z="0.0" x="37.142100326525906"/>
  </node>
  <node id="129937" label="KAT5" cy:nodeId="105900">
    <graphics y="1376.9414539770182" z="0.0" x="-766.723347671521"/>
  </node>
  <node id="129935" label="GNB1" cy:nodeId="105902">
    <graphics y="1959.2031574682292" z="0.0" x="829.8112592620728"/>
  </node>
  <node id="129934" label="KDM5A" cy:nodeId="105904">
    <graphics y="-958.6666698022786" z="0.0" x="-137.3282467203262"/>
  </node>
  <node id="129906" label="HS2ST1" cy:nodeId="105906">
    <graphics y="-1229.6039561792318" z="0.0" x="448.71354197691653"/>
  </node>
  <node id="129933" label="KDM5B" cy:nodeId="105907">
    <graphics y="-1607.1427135034505" z="0.0" x="-168.41753102113034"/>
  </node>
  <node id="129931" label="LYL1" cy:nodeId="105911">
    <graphics y="336.5904713110026" z="0.0" x="17.02982615660403"/>
  </node>
  <node id="129929" label="MAFB" cy:nodeId="105914">
    <graphics y="1015.2064686254557" z="0.0" x="-272.2833452301147"/>
  </node>
  <node id="129928" label="MAZ" cy:nodeId="105916">
    <graphics y="2068.500734372526" z="0.0" x="430.67760752867434"/>
  </node>
  <node id="129927" label="B4GALT2" cy:nodeId="105917">
    <graphics y="2077.798311276823" z="0.0" x="530.2444333953736"/>
  </node>
  <node id="129926" label="MED1" cy:nodeId="105924">
    <graphics y="-1263.5894755884115" z="0.0" x="-126.94337178040769"/>
  </node>
  <node id="129923" label="MITF" cy:nodeId="105929">
    <graphics y="-1896.0948619409505" z="0.0" x="380.63163279722903"/>
  </node>
  <node id="130008" label="DICER1" cy:nodeId="107985">
    <graphics y="-2199.529981569857" z="0.0" x="-360.04721546937253"/>
  </node>
  <node id="130007" label="E2F4" cy:nodeId="107987">
    <graphics y="1142.9697708324488" z="0.0" x="-173.6225023346069"/>
  </node>
  <node id="129968" label="ALG14" cy:nodeId="107992">
    <graphics y="1968.500734372526" z="0.0" x="-268.0228700714233"/>
  </node>
  <node id="129917" label="NFYC" cy:nodeId="105946">
    <graphics y="1968.500734372526" z="0.0" x="729.8112592620728"/>
  </node>
  <node id="129920" label="NFIC" cy:nodeId="105945">
    <graphics y="-1362.3128108545247" z="0.0" x="-313.61850453187253"/>
  </node>
  <node id="129913" label="NPAT" cy:nodeId="105948">
    <graphics y="-373.9091319604818" z="0.0" x="-146.0594205932739"/>
  </node>
  <node id="129915" label="NIPBL" cy:nodeId="105947">
    <graphics y="-280.6443614526693" z="0.0" x="-537.053914077771"/>
  </node>
  <node id="129911" label="NR2C2" cy:nodeId="105949">
    <graphics y="-1054.3253306909505" z="0.0" x="-142.17669201661374"/>
  </node>
  <node id="129970" label="GALNT3" cy:nodeId="108000">
    <graphics y="-2477.8421153589193" z="0.0" x="870.045939437854"/>
  </node>
  <node id="129909" label="PIAS1" cy:nodeId="105958">
    <graphics y="-1230.8929423852865" z="0.0" x="-637.4533586578491"/>
  </node>
  <node id="129905" label="POLR3A" cy:nodeId="105960">
    <graphics y="-1594.514875368685" z="0.0" x="-375.48186207581784"/>
  </node>
  <node id="129907" label="POLR2B" cy:nodeId="105959">
    <graphics y="-1148.6456279321615" z="0.0" x="275.97172068785403"/>
  </node>
  <node id="129898" label="PRDM1" cy:nodeId="105962">
    <graphics y="381.66517071285807" z="0.0" x="185.0402936859009"/>
  </node>
  <node id="130000" label="CHST1" cy:nodeId="108010">
    <graphics y="480.9246883825358" z="0.0" x="743.0741987151978"/>
  </node>
  <node id="129860" label="MGAT5B" cy:nodeId="108014">
    <graphics y="-2090.664014772982" z="0.0" x="856.2171430511353"/>
  </node>
  <node id="129896" label="UGGT2" cy:nodeId="105966">
    <graphics y="-266.1505870386068" z="0.0" x="91.2438306732056"/>
  </node>
  <node id="129897" label="RB1" cy:nodeId="105965">
    <graphics y="-472.1543712182943" z="0.0" x="24.724787704455593"/>
  </node>
</graph>
