# Supplementary material for: A systems-based framework to computationally describe putative transcription factors and signaling pathways regulating glycan biosynthesis
Source: publisher site journal article supplement (doi:10.3762/bjoc.17.119), 2021-07-22
Supplement: Additional file 2 [file 1860-5397-17-119-S2.cys › CytoscapeSession-2021_03_21-12_01/views/123032-154045-STES.xgmml]

<?xml version="1.0" encoding="UTF-8" standalone="yes"?>
<graph id="154045" label="STES" cy:view="1" cy:networkId="123032" cy:visualStyle="default" cy:rendererId="org.cytoscape.ding" cy:documentVersion="3.0" xmlns:dc="http://purl.org/dc/elements/1.1/" xmlns:xlink="http://www.w3.org/1999/xlink" xmlns:rdf="http://www.w3.org/1999/02/22-rdf-syntax-ns#" xmlns:cy="http://www.cytoscape.org" xmlns="http://www.cs.rpi.edu/XGMML">
  <graphics>
    <att name="NETWORK_NODE_SELECTION" value="true" type="string" cy:type="String"/>
    <att name="NETWORK_CENTER_X_LOCATION" value="-29.77593994140625" type="string" cy:type="String"/>
    <att name="NETWORK_HEIGHT" value="510.0" type="string" cy:type="String"/>
    <att name="NETWORK_TITLE" value="STES" type="string" cy:type="String"/>
    <att name="NETWORK_EDGE_SELECTION" value="true" type="string" cy:type="String"/>
    <att name="NETWORK_CENTER_Y_LOCATION" value="6.233154296875" type="string" cy:type="String"/>
    <att name="NETWORK_WIDTH" value="1312.0" type="string" cy:type="String"/>
    <att name="NETWORK_DEPTH" value="0.0" type="string" cy:type="String"/>
    <att name="NETWORK_SCALE_FACTOR" value="0.11374662401832053" type="string" cy:type="String"/>
    <att name="NETWORK_ANNOTATION_SELECTION" value="false" type="string" cy:type="String"/>
    <att name="NETWORK_CENTER_Z_LOCATION" value="0.0" type="string" cy:type="String"/>
  </graphics>
  <node id="154106" label="RBL2" cy:nodeId="105968">
    <graphics y="-102.6011480114289" z="0.0" x="851.1142175885348"/>
  </node>
  <node id="154108" label="RBBP5" cy:nodeId="105967">
    <graphics y="-568.1773638150521" z="0.0" x="238.17387945376913"/>
  </node>
  <node id="154174" label="B4GALNT3" cy:nodeId="108015">
    <graphics y="-1689.8222917935677" z="0.0" x="972.9895837994723"/>
  </node>
  <node id="154326" label="CHST14" cy:nodeId="108018">
    <graphics y="680.906162796276" z="0.0" x="359.3705957623629"/>
  </node>
  <node id="154135" label="NR2F2" cy:nodeId="108017">
    <graphics y="1073.5585675814323" z="0.0" x="820.5252283307223"/>
  </node>
  <node id="154105" label="RCOR1" cy:nodeId="105969">
    <graphics y="-1116.6511492154427" z="0.0" x="403.6823633404879"/>
  </node>
  <node id="154102" label="PIGB" cy:nodeId="108020">
    <graphics y="-61.543284835559916" z="0.0" x="-125.58505456722696"/>
  </node>
  <node id="154127" label="PDX1" cy:nodeId="108019">
    <graphics y="-785.7268328091927" z="0.0" x="-1856.0068761614652"/>
  </node>
  <node id="154103" label="RFX7" cy:nodeId="105974">
    <graphics y="-218.7839540860482" z="0.0" x="-46.71206682003458"/>
  </node>
  <node id="154365" label="COG2" cy:nodeId="105973">
    <graphics y="-659.397792281849" z="0.0" x="-23.87216966427286"/>
  </node>
  <node id="154120" label="FPGT" cy:nodeId="105976">
    <graphics y="-865.8023943326302" z="0.0" x="166.82195074283163"/>
  </node>
  <node id="154267" label="POMT2" cy:nodeId="108023">
    <graphics y="-969.859462203724" z="0.0" x="829.4759729596285"/>
  </node>
  <node id="154101" label="RUNX1" cy:nodeId="105978">
    <graphics y="962.2009015658073" z="0.0" x="1390.1791589947848"/>
  </node>
  <node id="154087" label="SRC" cy:nodeId="108028">
    <graphics y="-627.3844255826302" z="0.0" x="-849.545877626309"/>
  </node>
  <node id="154364" label="PIGA" cy:nodeId="108027">
    <graphics y="-766.5016741177865" z="0.0" x="412.71455938540976"/>
  </node>
  <node id="154100" label="RUNX3" cy:nodeId="105982">
    <graphics y="873.9990583040885" z="0.0" x="93.329854795566"/>
  </node>
  <node id="154078" label="STAT5B" cy:nodeId="108029">
    <graphics y="931.9638410189323" z="0.0" x="527.8982752057223"/>
  </node>
  <node id="154067" label="B3GNT9" cy:nodeId="108032">
    <graphics y="1616.9678693392448" z="0.0" x="859.774434873691"/>
  </node>
  <node id="154097" label="SIN3A" cy:nodeId="105984">
    <graphics y="-977.9610857388802" z="0.0" x="530.9305017682223"/>
  </node>
  <node id="154069" label="TCF21" cy:nodeId="108031">
    <graphics y="1281.4429669954948" z="0.0" x="718.2301843854098"/>
  </node>
  <node id="154095" label="SIX5" cy:nodeId="105986">
    <graphics y="688.6980329134635" z="0.0" x="-31.54781310833414"/>
  </node>
  <node id="154169" label="HS3ST3A1" cy:nodeId="108033">
    <graphics y="749.962559280651" z="0.0" x="491.2818811627535"/>
  </node>
  <node id="154405" label="UGCG" cy:nodeId="105985">
    <graphics y="-1262.3998064420052" z="0.0" x="1175.7570398541598"/>
  </node>
  <node id="154051" label="GMPPB" cy:nodeId="108038">
    <graphics y="1924.5639081576041" z="0.0" x="-915.5867101458402"/>
  </node>
  <node id="154091" label="SMC3" cy:nodeId="105990">
    <graphics y="-289.2657427213021" z="0.0" x="250.96712286197226"/>
  </node>
  <node id="154092" label="SMC1A" cy:nodeId="105989">
    <graphics y="-1051.3522600552865" z="0.0" x="279.775655576816"/>
  </node>
  <node id="154052" label="XBP1" cy:nodeId="108037">
    <graphics y="1915.2663312533073" z="0.0" x="-1015.1535360125395"/>
  </node>
  <node id="154133" label="NR4A1" cy:nodeId="111109">
    <graphics y="1732.8311505892448" z="0.0" x="757.1762293072848"/>
  </node>
  <node id="154196" label="GCNT1" cy:nodeId="108552">
    <graphics y="-1436.0959734341927" z="0.0" x="404.56719000064413"/>
  </node>
  <node id="154073" label="TBL1XR1" cy:nodeId="111114">
    <graphics y="-730.725673141224" z="0.0" x="231.35460455142538"/>
  </node>
  <node id="154085" label="SRCAP" cy:nodeId="105994">
    <graphics y="-79.32514900181968" z="0.0" x="-358.67023675716837"/>
  </node>
  <node id="154058" label="TTF1" cy:nodeId="111116">
    <graphics y="-329.244227828724" z="0.0" x="683.0581873150973"/>
  </node>
  <node id="154257" label="PMM2" cy:nodeId="108556">
    <graphics y="-827.1562151334115" z="0.0" x="-1691.2324620989652"/>
  </node>
  <node id="154340" label="DDOST" cy:nodeId="108555">
    <graphics y="-1432.9327654263802" z="0.0" x="-961.0337926653715"/>
  </node>
  <node id="154338" label="GANAB" cy:nodeId="105998">
    <graphics y="-972.416591109974" z="0.0" x="-217.43058221615274"/>
  </node>
  <node id="154352" label="PIGF" cy:nodeId="108557">
    <graphics y="-2009.3138689420052" z="0.0" x="-578.8924352434965"/>
  </node>
  <node id="154083" label="STAT1" cy:nodeId="105999">
    <graphics y="1114.9418683626823" z="0.0" x="-115.44269006527384"/>
  </node>
  <node id="154259" label="GALE" cy:nodeId="108559">
    <graphics y="-809.7641252896615" z="0.0" x="-1466.7473546770902"/>
  </node>
  <node id="154080" label="STAT4" cy:nodeId="106002">
    <graphics y="1148.9920392611198" z="0.0" x="382.675313779941"/>
  </node>
  <node id="154082" label="STAT2" cy:nodeId="106001">
    <graphics y="894.653233108776" z="0.0" x="342.295675108066"/>
  </node>
  <node id="154076" label="SUMO2" cy:nodeId="106004">
    <graphics y="-956.6057390591927" z="0.0" x="-1152.5159093645902"/>
  </node>
  <node id="154079" label="STAT5A" cy:nodeId="106003">
    <graphics y="1026.3250470736198" z="0.0" x="145.8361261578707"/>
  </node>
  <node id="154075" label="TAF1" cy:nodeId="106006">
    <graphics y="-515.8801836392709" z="0.0" x="470.2885645123629"/>
  </node>
  <node id="154313" label="CSNK2A1" cy:nodeId="108568">
    <graphics y="1915.2663312533073" z="0.0" x="-616.019884279141"/>
  </node>
  <node id="154070" label="TCF12" cy:nodeId="106007">
    <graphics y="-648.1901506802865" z="0.0" x="1011.3734949322848"/>
  </node>
  <node id="154066" label="TCF7L1" cy:nodeId="106009">
    <graphics y="1148.0605207064323" z="0.0" x="659.0353601666598"/>
  </node>
  <node id="154354" label="ALG5" cy:nodeId="106012">
    <graphics y="-1865.0917009732552" z="0.0" x="-491.1508886126371"/>
  </node>
  <node id="154064" label="TDRD3" cy:nodeId="106011">
    <graphics y="-356.8059038541146" z="0.0" x="-265.3061773089262"/>
  </node>
  <node id="154063" label="TEAD1" cy:nodeId="106013">
    <graphics y="695.8555646517448" z="0.0" x="647.0072229596285"/>
  </node>
  <node id="154062" label="TET2" cy:nodeId="106016">
    <graphics y="-749.4847673795052" z="0.0" x="530.7352503033785"/>
  </node>
  <node id="154291" label="E2F8" cy:nodeId="108575">
    <graphics y="-891.302089156849" z="0.0" x="-276.34208123959024"/>
  </node>
  <node id="154059" label="TRIM28" cy:nodeId="106018">
    <graphics y="-1236.4382585904427" z="0.0" x="-610.9073888567777"/>
  </node>
  <node id="154141" label="PIGL" cy:nodeId="108578">
    <graphics y="1924.5639081576041" z="0.0" x="-1115.1535360125395"/>
  </node>
  <node id="154057" label="TTF2" cy:nodeId="106019">
    <graphics y="-1040.2797502896615" z="0.0" x="111.301778623691"/>
  </node>
  <node id="154251" label="EZH2" cy:nodeId="108582">
    <graphics y="-1305.8709978482552" z="0.0" x="-154.11503045834024"/>
  </node>
  <node id="154054" label="WDR5" cy:nodeId="106024">
    <graphics y="-1549.4229998013802" z="0.0" x="-823.1758214739652"/>
  </node>
  <node id="154050" label="XRN2" cy:nodeId="106025">
    <graphics y="-669.249354781849" z="0.0" x="86.67131597720663"/>
  </node>
  <node id="154049" label="YY1" cy:nodeId="106028">
    <graphics y="-1405.5348162076302" z="0.0" x="-393.98981683529337"/>
  </node>
  <node id="154403" label="GALNT5" cy:nodeId="106027">
    <graphics y="-1475.9330095670052" z="0.0" x="1553.3407800885348"/>
  </node>
  <node id="154226" label="GMEB2" cy:nodeId="108589">
    <graphics y="-954.612147750599" z="0.0" x="-710.0838414934965"/>
  </node>
  <node id="154047" label="C1GALT1C1" cy:nodeId="106032">
    <graphics y="-554.2650102994271" z="0.0" x="870.492452451816"/>
  </node>
  <node id="154212" label="HDAC2" cy:nodeId="108592">
    <graphics y="-1515.2049822232552" z="0.0" x="-604.582742860684"/>
  </node>
  <node id="154048" label="ZBTB33" cy:nodeId="106031">
    <graphics y="-616.3442034146615" z="0.0" x="585.786397764316"/>
  </node>
  <node id="154195" label="HOXA13" cy:nodeId="118332">
    <graphics y="1915.2663312533073" z="0.0" x="-216.8862325457426"/>
  </node>
  <node id="154142" label="NCOR1" cy:nodeId="108603">
    <graphics y="1915.2663312533073" z="0.0" x="-1214.7203618792387"/>
  </node>
  <node id="154200" label="HNF4G" cy:nodeId="118331">
    <graphics y="-1344.9355730435677" z="0.0" x="247.61388189517538"/>
  </node>
  <node id="154184" label="ISL1" cy:nodeId="118334">
    <graphics y="1421.8674054720573" z="0.0" x="614.556417295566"/>
  </node>
  <node id="154193" label="HOXA4" cy:nodeId="118333">
    <graphics y="1621.1955304720573" z="0.0" x="986.1123865338473"/>
  </node>
  <node id="154332" label="CHST5" cy:nodeId="108612">
    <graphics y="-1452.1534685513802" z="0.0" x="-32.68417279995401"/>
  </node>
  <node id="154098" label="SFMBT1" cy:nodeId="108615">
    <graphics y="-771.829188766224" z="0.0" x="657.477559873691"/>
  </node>
  <node id="154094" label="SMARCB1" cy:nodeId="108617">
    <graphics y="-1413.6095232388802" z="0.0" x="-1592.2052404192777"/>
  </node>
  <node id="154145" label="MYB" cy:nodeId="113228">
    <graphics y="2076.423740921276" z="0.0" x="-1856.0068761614652"/>
  </node>
  <node id="154132" label="PAX5" cy:nodeId="113230">
    <graphics y="1638.2269025423698" z="0.0" x="435.0425928326754"/>
  </node>
  <node id="154130" label="PBX3" cy:nodeId="113231">
    <graphics y="809.6963849642448" z="0.0" x="644.7679041119723"/>
  </node>
  <node id="154056" label="UBE2I" cy:nodeId="108629">
    <graphics y="-594.489345016224" z="0.0" x="-1608.7358800677152"/>
  </node>
  <node id="154258" label="B3GNT3" cy:nodeId="112223">
    <graphics y="-897.6302751920052" z="0.0" x="-1545.9669591692777"/>
  </node>
  <node id="154134" label="NR2F6" cy:nodeId="117859">
    <graphics y="-1047.4643206021615" z="0.0" x="-1685.2483312395902"/>
  </node>
  <node id="154205" label="B4GALT4" cy:nodeId="112227">
    <graphics y="2185.721317825573" z="0.0" x="-1556.8732244280668"/>
  </node>
  <node id="154262" label="SMPD1" cy:nodeId="109673">
    <graphics y="1544.7187238314323" z="0.0" x="548.694600889316"/>
  </node>
  <node id="154233" label="GATA3" cy:nodeId="109677">
    <graphics y="989.6197248079948" z="0.0" x="397.6524561139254"/>
  </node>
  <node id="154089" label="SNAI2" cy:nodeId="109686">
    <graphics y="899.2365460970573" z="0.0" x="662.2438562604098"/>
  </node>
  <node id="154118" label="PIGG" cy:nodeId="109689">
    <graphics y="-284.66546195958335" z="0.0" x="-153.2239553240629"/>
  </node>
  <node id="154330" label="GALNT8" cy:nodeId="123042">
    <graphics y="-1536.0517839810677" z="0.0" x="-224.57001703060587"/>
  </node>
  <node id="154207" label="HMGN1" cy:nodeId="123043">
    <graphics y="-1568.2586931607552" z="0.0" x="-701.1468908099027"/>
  </node>
  <node id="154370" label="BCOR" cy:nodeId="110788">
    <graphics y="-989.409022750599" z="0.0" x="653.2825525494723"/>
  </node>
  <node id="154261" label="ESRRA" cy:nodeId="110794">
    <graphics y="-918.779139938099" z="0.0" x="-1377.2024328020902"/>
  </node>
  <node id="154410" label="ADNP" cy:nodeId="105684">
    <graphics y="1526.1204572298698" z="0.0" x="68.08843023501913"/>
  </node>
  <node id="154198" label="GALK2" cy:nodeId="110806">
    <graphics y="-1494.3236345670052" z="0.0" x="287.12740118228476"/>
  </node>
  <node id="154408" label="AFF4" cy:nodeId="105686">
    <graphics y="-789.6220964810677" z="0.0" x="813.0843103619723"/>
  </node>
  <node id="154409" label="FUT7" cy:nodeId="105685">
    <graphics y="1277.6717267611198" z="0.0" x="225.30013067447226"/>
  </node>
  <node id="154395" label="STT3B" cy:nodeId="105688">
    <graphics y="-672.5730242154427" z="0.0" x="383.22823126040976"/>
  </node>
  <node id="154407" label="MAN1A2" cy:nodeId="105687">
    <graphics y="-417.02056449864585" z="0.0" x="577.5330408307223"/>
  </node>
  <node id="154277" label="FUT11" cy:nodeId="105690">
    <graphics y="1228.0662580111198" z="0.0" x="1054.6001795025973"/>
  </node>
  <node id="154397" label="NEU3" cy:nodeId="105689">
    <graphics y="-582.8189653775521" z="0.0" x="84.5463312359957"/>
  </node>
  <node id="154219" label="COG5" cy:nodeId="105692">
    <graphics y="-537.3881182095834" z="0.0" x="-23.711932351955966"/>
  </node>
  <node id="154177" label="ACER2" cy:nodeId="105691">
    <graphics y="-1502.1701921841927" z="0.0" x="558.153096983066"/>
  </node>
  <node id="154406" label="MAN2A1" cy:nodeId="105694">
    <graphics y="-596.441005172474" z="0.0" x="418.46785528384726"/>
  </node>
  <node id="154275" label="SLC35A3" cy:nodeId="105695">
    <graphics y="-1096.368495406849" z="0.0" x="171.02022344790976"/>
  </node>
  <node id="154090" label="RTF1" cy:nodeId="105700">
    <graphics y="-118.92805904362876" z="0.0" x="174.7658136578707"/>
  </node>
  <node id="154394" label="SLC35A5" cy:nodeId="105702">
    <graphics y="-139.07721275304038" z="0.0" x="671.5766199322848"/>
  </node>
  <node id="154398" label="ATF2" cy:nodeId="105704">
    <graphics y="-344.95420402501304" z="0.0" x="360.8067835065035"/>
  </node>
  <node id="154396" label="UGGT1" cy:nodeId="105705">
    <graphics y="-508.6912798306771" z="0.0" x="228.46855718814413"/>
  </node>
  <node id="154278" label="HAS1" cy:nodeId="105708">
    <graphics y="1409.6731916048698" z="0.0" x="697.4066370221285"/>
  </node>
  <node id="154222" label="B3GNT5" cy:nodeId="105707">
    <graphics y="1915.2663312533073" z="0.0" x="-1414.287187745938"/>
  </node>
  <node id="154239" label="HAS2" cy:nodeId="105709">
    <graphics y="755.6749005892448" z="0.0" x="578.478780576816"/>
  </node>
  <node id="154393" label="ALG10" cy:nodeId="105711">
    <graphics y="-840.096522750599" z="0.0" x="63.49625189029257"/>
  </node>
  <node id="154390" label="BACH1" cy:nodeId="105714">
    <graphics y="598.7764630892448" z="0.0" x="762.5894983502535"/>
  </node>
  <node id="154138" label="FKTN" cy:nodeId="105713">
    <graphics y="-521.4418596646615" z="0.0" x="345.83147222720663"/>
  </node>
  <node id="154391" label="MAN1A1" cy:nodeId="105716">
    <graphics y="282.5094037630729" z="0.0" x="443.34892828189413"/>
  </node>
  <node id="154389" label="CSGALNACT2" cy:nodeId="105715">
    <graphics y="900.0829816439323" z="0.0" x="595.386983701816"/>
  </node>
  <node id="154384" label="CHST11" cy:nodeId="105718">
    <graphics y="1026.8647199251823" z="0.0" x="460.59847051822226"/>
  </node>
  <node id="154208" label="CHSY1" cy:nodeId="105717">
    <graphics y="980.9895978548698" z="0.0" x="1645.0690515729098"/>
  </node>
  <node id="154199" label="SULT1B1" cy:nodeId="114936">
    <graphics y="-1611.2538103482552" z="0.0" x="257.83977300845663"/>
  </node>
  <node id="154372" label="ST6GAL2" cy:nodeId="105720">
    <graphics y="808.9758649447135" z="0.0" x="798.8505457135348"/>
  </node>
  <node id="154378" label="GFPT2" cy:nodeId="105719">
    <graphics y="1104.4976544954948" z="0.0" x="731.3019617291598"/>
  </node>
  <node id="154386" label="MGAT1" cy:nodeId="105724">
    <graphics y="997.7742658236198" z="0.0" x="320.57784063540976"/>
  </node>
  <node id="154388" label="BATF3" cy:nodeId="105723">
    <graphics y="969.9656720736198" z="0.0" x="218.44548589908163"/>
  </node>
  <node id="154368" label="BRCA1" cy:nodeId="105728">
    <graphics y="-847.6023210904427" z="0.0" x="-45.32401864803751"/>
  </node>
  <node id="154072" label="ALG10B" cy:nodeId="105727">
    <graphics y="-433.4925493619271" z="0.0" x="124.749776670566"/>
  </node>
  <node id="154121" label="PIGN" cy:nodeId="105730">
    <graphics y="-856.8603777310677" z="0.0" x="296.65572149478476"/>
  </node>
  <node id="154367" label="PIGW" cy:nodeId="105729">
    <graphics y="-1273.4834246060677" z="0.0" x="-382.8523046282621"/>
  </node>
  <node id="154269" label="FAM20B" cy:nodeId="105731">
    <graphics y="-32.63351768468101" z="0.0" x="428.4537256451754"/>
  </node>
  <node id="154362" label="ALG12" cy:nodeId="105734">
    <graphics y="-1555.7562517545052" z="0.0" x="-1402.6266271380277"/>
  </node>
  <node id="154363" label="BRD1" cy:nodeId="105733">
    <graphics y="-1726.3276628873177" z="0.0" x="-1500.8953038958402"/>
  </node>
  <node id="154361" label="C17orf49" cy:nodeId="105736">
    <graphics y="-1530.7395281216927" z="0.0" x="-1544.6677648333402"/>
  </node>
  <node id="154358" label="CBFB" cy:nodeId="105739">
    <graphics y="1924.5639081576041" z="0.0" x="-716.019884279141"/>
  </node>
  <node id="154383" label="BCL6" cy:nodeId="107275">
    <graphics y="1031.8837628939323" z="0.0" x="713.0587366315035"/>
  </node>
  <node id="154119" label="FUT10" cy:nodeId="107278">
    <graphics y="-938.7236589810677" z="0.0" x="112.43184454165976"/>
  </node>
  <node id="154356" label="CBX3" cy:nodeId="105741">
    <graphics y="-1693.1449236295052" z="0.0" x="-547.3592321184965"/>
  </node>
  <node id="154191" label="RFNG" cy:nodeId="105744">
    <graphics y="-1186.5302996060677" z="0.0" x="-1448.4132482317777"/>
  </node>
  <node id="154203" label="B4GALT5" cy:nodeId="107279">
    <graphics y="-792.8427385709115" z="0.0" x="-654.4105626849027"/>
  </node>
  <node id="154381" label="ST6GALNAC6" cy:nodeId="105746">
    <graphics y="1201.3222394564323" z="0.0" x="629.3356531354098"/>
  </node>
  <node id="154306" label="SLC35B3" cy:nodeId="107281">
    <graphics y="1915.2663312533073" z="0.0" x="-416.4530584124418"/>
  </node>
  <node id="154349" label="CBX7" cy:nodeId="105745">
    <graphics y="1168.9649396517448" z="0.0" x="817.3031213971285"/>
  </node>
  <node id="154295" label="E2F3" cy:nodeId="107284">
    <graphics y="-1013.6706194302865" z="0.0" x="-467.72318475521524"/>
  </node>
  <node id="154369" label="MAN2A2" cy:nodeId="105748">
    <graphics y="-852.1711077115365" z="0.0" x="390.92656500064413"/>
  </node>
  <node id="154380" label="ST3GAL3" cy:nodeId="105747">
    <graphics y="1112.8345685579948" z="0.0" x="785.5790003033785"/>
  </node>
  <node id="154353" label="ALG8" cy:nodeId="107286">
    <graphics y="-1809.5110124966927" z="0.0" x="-646.999246766934"/>
  </node>
  <node id="154285" label="EED" cy:nodeId="107285">
    <graphics y="-1691.3098406216927" z="0.0" x="-707.5416662005277"/>
  </node>
  <node id="154342" label="CBX8" cy:nodeId="105752">
    <graphics y="-1495.6482195279427" z="0.0" x="-1047.3678380755277"/>
  </node>
  <node id="154360" label="B3GAT3" cy:nodeId="105754">
    <graphics y="-1387.6852068326302" z="0.0" x="-1406.9177648333402"/>
  </node>
  <node id="154341" label="GALK1" cy:nodeId="105753">
    <graphics y="-1332.5201677701302" z="0.0" x="-1023.7544957903715"/>
  </node>
  <node id="154337" label="CDK8" cy:nodeId="105756">
    <graphics y="-642.7522234341927" z="0.0" x="278.91866094790976"/>
  </node>
  <node id="154116" label="POU2F1" cy:nodeId="118043">
    <graphics y="-613.3358415982552" z="0.0" x="-433.55829828060587"/>
  </node>
  <node id="154302" label="DPM2" cy:nodeId="105758">
    <graphics y="-1410.3082537076302" z="0.0" x="-1116.1611730364652"/>
  </node>
  <node id="154053" label="MAN1B1" cy:nodeId="105760">
    <graphics y="-1770.4090837857552" z="0.0" x="-887.380594423184"/>
  </node>
  <node id="154159" label="PIGQ" cy:nodeId="105759">
    <graphics y="-1279.5897478482552" z="0.0" x="-1368.3734533099027"/>
  </node>
  <node id="154248" label="FOSL2" cy:nodeId="107295">
    <graphics y="-1174.0875505826302" z="0.0" x="1290.0663660260348"/>
  </node>
  <node id="154244" label="FOXK1" cy:nodeId="107298">
    <graphics y="1915.2663312533073" z="0.0" x="-17.319406679043368"/>
  </node>
  <node id="154298" label="MOGS" cy:nodeId="105762">
    <graphics y="-1056.835048141224" z="0.0" x="-978.275613954434"/>
  </node>
  <node id="154201" label="ALG11" cy:nodeId="107300">
    <graphics y="-712.5027117154427" z="0.0" x="-727.5098668841215"/>
  </node>
  <node id="154329" label="CEBPA" cy:nodeId="105764">
    <graphics y="-1882.5552019498177" z="0.0" x="-161.3285466936918"/>
  </node>
  <node id="154243" label="EXTL3" cy:nodeId="107299">
    <graphics y="1924.5639081576041" z="0.0" x="82.24741918765585"/>
  </node>
  <node id="154327" label="CHST12" cy:nodeId="105763">
    <graphics y="760.2601056673698" z="0.0" x="166.06303961001913"/>
  </node>
  <node id="154217" label="GTF3C2" cy:nodeId="107302">
    <graphics y="-1067.7700456998177" z="0.0" x="-180.752908876309"/>
  </node>
  <node id="154347" label="MFNG" cy:nodeId="105766">
    <graphics y="1269.4756818392448" z="0.0" x="529.4994104596285"/>
  </node>
  <node id="154279" label="NAGK" cy:nodeId="105765">
    <graphics y="1331.2725568392448" z="0.0" x="318.8690088483004"/>
  </node>
  <node id="154376" label="A4GALT" cy:nodeId="105768">
    <graphics y="1233.3637433626823" z="0.0" x="800.6901453229098"/>
  </node>
  <node id="154213" label="HDAC1" cy:nodeId="107303">
    <graphics y="-1673.1539568326302" z="0.0" x="-1084.2399083880277"/>
  </node>
  <node id="154328" label="CEBPB" cy:nodeId="105767">
    <graphics y="376.53839546229165" z="0.0" x="-63.74122255123575"/>
  </node>
  <node id="154321" label="CHD2" cy:nodeId="105770">
    <graphics y="-285.0875200650521" z="0.0" x="546.5304773541598"/>
  </node>
  <node id="154323" label="CHD1" cy:nodeId="105769">
    <graphics y="-505.3529009244271" z="0.0" x="591.372091123691"/>
  </node>
  <node id="154314" label="NDST2" cy:nodeId="105772">
    <graphics y="1461.9989972689323" z="0.0" x="-57.14511697567423"/>
  </node>
  <node id="154322" label="OGT" cy:nodeId="105771">
    <graphics y="-458.085780563099" z="0.0" x="437.40291387759726"/>
  </node>
  <node id="154320" label="CHD8" cy:nodeId="105774">
    <graphics y="-468.9421343228646" z="0.0" x="302.31706793033163"/>
  </node>
  <node id="154318" label="LAMP3" cy:nodeId="105776">
    <graphics y="1122.3821759798698" z="0.0" x="24.052976438632413"/>
  </node>
  <node id="154319" label="CIITA" cy:nodeId="105775">
    <graphics y="1220.6862531283073" z="0.0" x="43.117193052401944"/>
  </node>
  <node id="154280" label="GAL3ST4" cy:nodeId="105778">
    <graphics y="1236.5533185579948" z="0.0" x="464.8993128033785"/>
  </node>
  <node id="154188" label="MAN2B1" cy:nodeId="105777">
    <graphics y="1133.8978009798698" z="0.0" x="129.0849054547457"/>
  </node>
  <node id="154316" label="CPSF3L" cy:nodeId="105780">
    <graphics y="-671.152186813099" z="0.0" x="-1049.3164464739652"/>
  </node>
  <node id="154187" label="DSE" cy:nodeId="105779">
    <graphics y="816.3457990267448" z="0.0" x="422.60771734439413"/>
  </node>
  <node id="154173" label="KLF5" cy:nodeId="107318">
    <graphics y="-678.4298357388802" z="0.0" x="-205.72718255794962"/>
  </node>
  <node id="154310" label="B4GALT7" cy:nodeId="105782">
    <graphics y="-1625.3010515591927" z="0.0" x="-1844.8857824114652"/>
  </node>
  <node id="154178" label="KLF4" cy:nodeId="107317">
    <graphics y="-1529.5559343716927" z="0.0" x="956.3417566510348"/>
  </node>
  <node id="154324" label="B3GALT6" cy:nodeId="105781">
    <graphics y="-780.7162737271615" z="0.0" x="-893.7220250872465"/>
  </node>
  <node id="154171" label="LDB1" cy:nodeId="107320">
    <graphics y="1596.5495343783073" z="0.0" x="663.8375452252535"/>
  </node>
  <node id="154155" label="MED12" cy:nodeId="107324">
    <graphics y="-1090.9134783170052" z="0.0" x="534.891866514316"/>
  </node>
  <node id="154315" label="CREBBP" cy:nodeId="105790">
    <graphics y="1599.4460187533073" z="0.0" x="-203.0076696184965"/>
  </node>
  <node id="154151" label="MEF2D" cy:nodeId="107325">
    <graphics y="1815.2663312533073" z="0.0" x="528.5745447369723"/>
  </node>
  <node id="154297" label="B4GALT3" cy:nodeId="105789">
    <graphics y="-1243.1590837857552" z="0.0" x="-1125.3657628802152"/>
  </node>
  <node id="154401" label="POFUT1" cy:nodeId="105792">
    <graphics y="-783.720790328724" z="0.0" x="-430.93280999935587"/>
  </node>
  <node id="154084" label="COG7" cy:nodeId="105791">
    <graphics y="31.312504349010396" z="0.0" x="-478.4522496966215"/>
  </node>
  <node id="154309" label="CTNNB1" cy:nodeId="105794">
    <graphics y="-660.9985613248177" z="0.0" x="700.5375574322848"/>
  </node>
  <node id="154311" label="CTBP1" cy:nodeId="105793">
    <graphics y="-1542.9454607388802" z="0.0" x="-1700.3004552630277"/>
  </node>
  <node id="154305" label="E2F1" cy:nodeId="105796">
    <graphics y="-1191.3612322232552" z="0.0" x="-866.6131994036527"/>
  </node>
  <node id="154307" label="DEK" cy:nodeId="105795">
    <graphics y="1924.5639081576041" z="0.0" x="-316.8862325457426"/>
  </node>
  <node id="154124" label="PHF8" cy:nodeId="107334">
    <graphics y="-680.918055953724" z="0.0" x="484.21394903384726"/>
  </node>
  <node id="154303" label="SLC35B1" cy:nodeId="105798">
    <graphics y="-1277.1859392545052" z="0.0" x="-941.9717809466215"/>
  </node>
  <node id="154304" label="ALG3" cy:nodeId="105797">
    <graphics y="-1124.6988787076302" z="0.0" x="-1127.8103429583402"/>
  </node>
  <node id="154123" label="PML" cy:nodeId="107336">
    <graphics y="1222.4751935579948" z="0.0" x="-223.37755792416056"/>
  </node>
  <node id="154399" label="KHK" cy:nodeId="105800">
    <graphics y="1995.8439984896354" z="0.0" x="-1784.9315892962309"/>
  </node>
  <node id="154086" label="SLC35A2" cy:nodeId="107335">
    <graphics y="-492.34136527989585" z="0.0" x="-928.1374913958402"/>
  </node>
  <node id="154355" label="DPM1" cy:nodeId="105799">
    <graphics y="-1368.8412126920052" z="0.0" x="-710.8658239153715"/>
  </node>
  <node id="154294" label="E2F6" cy:nodeId="105801">
    <graphics y="-1377.8668474576302" z="0.0" x="-535.3533727434965"/>
  </node>
  <node id="154290" label="EBF1" cy:nodeId="105804">
    <graphics y="1262.4969220736198" z="0.0" x="666.3797815533785"/>
  </node>
  <node id="154099" label="SETDB1" cy:nodeId="107339">
    <graphics y="-572.4384722134896" z="0.0" x="-168.51552789486368"/>
  </node>
  <node id="154293" label="E2F7" cy:nodeId="105803">
    <graphics y="-1157.1643328091927" z="0.0" x="-88.34463708675821"/>
  </node>
  <node id="154350" label="ST3GAL2" cy:nodeId="105806">
    <graphics y="1300.0091291048698" z="0.0" x="434.678975889316"/>
  </node>
  <node id="154289" label="CSGALNACT1" cy:nodeId="105805">
    <graphics y="1279.1694074251823" z="0.0" x="608.9995935650973"/>
  </node>
  <node id="154093" label="SMARCC1" cy:nodeId="107344">
    <graphics y="-803.4628557584115" z="0.0" x="233.1659143658785"/>
  </node>
  <node id="154374" label="CHST3" cy:nodeId="105807">
    <graphics y="1084.0722394564323" z="0.0" x="689.796895811191"/>
  </node>
  <node id="154231" label="FUT4" cy:nodeId="105810">
    <graphics y="1924.5639081576041" z="0.0" x="-1514.287187745938"/>
  </node>
  <node id="154068" label="TPST1" cy:nodeId="105809">
    <graphics y="1418.7660871126823" z="0.0" x="822.3686121197848"/>
  </node>
  <node id="154404" label="AHR" cy:nodeId="106836">
    <graphics y="-1403.6000017545052" z="0.0" x="1421.6338709088473"/>
  </node>
  <node id="154081" label="STAT3" cy:nodeId="107347">
    <graphics y="-1285.9649919888802" z="0.0" x="1334.3850916119723"/>
  </node>
  <node id="154287" label="ST3GAL6" cy:nodeId="105811">
    <graphics y="1368.5248761751823" z="0.0" x="540.889669248691"/>
  </node>
  <node id="154074" label="LAMP2" cy:nodeId="107350">
    <graphics y="-447.1144670865365" z="0.0" x="746.024434873691"/>
  </node>
  <node id="154400" label="ASCL2" cy:nodeId="106837">
    <graphics y="1915.2663312533073" z="0.0" x="-1713.8540136126371"/>
  </node>
  <node id="154284" label="EGR2" cy:nodeId="105816">
    <graphics y="1122.5551496126823" z="0.0" x="600.5794885846285"/>
  </node>
  <node id="154264" label="ST6GALNAC3" cy:nodeId="105815">
    <graphics y="1198.4659162142448" z="0.0" x="688.738302061191"/>
  </node>
  <node id="154055" label="VDR" cy:nodeId="107356">
    <graphics y="-1249.5608171841927" z="0.0" x="201.61899358951132"/>
  </node>
  <node id="154276" label="EHF" cy:nodeId="105819">
    <graphics y="-947.3879656216927" z="0.0" x="236.670675108066"/>
  </node>
  <node id="154273" label="ELF1" cy:nodeId="105822">
    <graphics y="-395.29803031895835" z="0.0" x="-35.423068931469516"/>
  </node>
  <node id="154274" label="EHMT2" cy:nodeId="105821">
    <graphics y="-856.9322771451302" z="0.0" x="-1021.6964513567777"/>
  </node>
  <node id="154359" label="CBFA2T3" cy:nodeId="106845">
    <graphics y="1475.1622052767448" z="0.0" x="1060.6813562604098"/>
  </node>
  <node id="154272" label="COG6" cy:nodeId="105824">
    <graphics y="-477.73955863927085" z="0.0" x="-101.46414773739298"/>
  </node>
  <node id="154339" label="CDK12" cy:nodeId="106848">
    <graphics y="-1143.9968523404427" z="0.0" x="-251.73697870052774"/>
  </node>
  <node id="154336" label="COG3" cy:nodeId="105823">
    <graphics y="-572.5081133267709" z="0.0" x="152.39018804751913"/>
  </node>
  <node id="154351" label="CBX6" cy:nodeId="106847">
    <graphics y="1502.6667218783073" z="0.0" x="453.49593145572226"/>
  </node>
  <node id="154271" label="ELK3" cy:nodeId="105826">
    <graphics y="1393.8047834017448" z="0.0" x="1286.1599939557223"/>
  </node>
  <node id="154270" label="ELK4" cy:nodeId="105827">
    <graphics y="90.98531013514321" z="0.0" x="437.74825079165976"/>
  </node>
  <node id="154266" label="ERCC6" cy:nodeId="105830">
    <graphics y="-603.5661272427865" z="0.0" x="500.7909143658785"/>
  </node>
  <node id="154343" label="XYLT1" cy:nodeId="106854">
    <graphics y="1339.8228498079948" z="0.0" x="1126.3063562604098"/>
  </node>
  <node id="154268" label="EP400" cy:nodeId="105829">
    <graphics y="-872.3102678677865" z="0.0" x="606.273458311191"/>
  </node>
  <node id="154348" label="MAN1C1" cy:nodeId="106853">
    <graphics y="1163.2420392611198" z="0.0" x="743.0691736432223"/>
  </node>
  <node id="154265" label="ERG" cy:nodeId="105832">
    <graphics y="1170.3665509798698" z="0.0" x="592.4649255963473"/>
  </node>
  <node id="154385" label="ST8SIA4" cy:nodeId="105834">
    <graphics y="1050.9843488314323" z="0.0" x="412.116231748691"/>
  </node>
  <node id="154282" label="CHSY3" cy:nodeId="105833">
    <graphics y="866.2195172884635" z="0.0" x="717.6909998150973"/>
  </node>
  <node id="154286" label="ST3GAL5" cy:nodeId="106857">
    <graphics y="1188.3224835970573" z="0.0" x="432.74153692447226"/>
  </node>
  <node id="154331" label="MGAT4A" cy:nodeId="106860">
    <graphics y="-1168.7779802701302" z="0.0" x="-488.67487542904337"/>
  </node>
  <node id="154157" label="GALNT7" cy:nodeId="106859">
    <graphics y="-1126.9503435513802" z="0.0" x="656.7486170025973"/>
  </node>
  <node id="154344" label="CHST7" cy:nodeId="105835">
    <graphics y="1261.9446759798698" z="0.0" x="889.0150354596285"/>
  </node>
  <node id="154254" label="CHST2" cy:nodeId="105838">
    <graphics y="1244.5933576204948" z="0.0" x="336.494161436191"/>
  </node>
  <node id="154167" label="SULT1C4" cy:nodeId="105837">
    <graphics y="697.1201520540885" z="0.0" x="993.3350427838473"/>
  </node>
  <node id="154382" label="CHST15" cy:nodeId="106861">
    <graphics y="1078.9877668001823" z="0.0" x="637.3836267682223"/>
  </node>
  <node id="154241" label="GPI" cy:nodeId="106864">
    <graphics y="-1270.4818376920052" z="0.0" x="-710.4293615130277"/>
  </node>
  <node id="154346" label="ST8SIA1" cy:nodeId="105840">
    <graphics y="1089.1712384798698" z="0.0" x="524.304464170566"/>
  </node>
  <node id="154234" label="GAPDH" cy:nodeId="106863">
    <graphics y="-1449.7816423795052" z="0.0" x="-748.974832704434"/>
  </node>
  <node id="154255" label="ETS1" cy:nodeId="105839">
    <graphics y="1145.8620343783073" z="0.0" x="477.74153692447226"/>
  </node>
  <node id="154223" label="GRHL1" cy:nodeId="106866">
    <graphics y="1924.5639081576041" z="0.0" x="-1314.7203618792387"/>
  </node>
  <node id="154252" label="ETV1" cy:nodeId="105842">
    <graphics y="838.6702008822135" z="0.0" x="1203.2256677838473"/>
  </node>
  <node id="154225" label="GPS2" cy:nodeId="106865">
    <graphics y="-516.6511797330209" z="0.0" x="-1505.5780431536527"/>
  </node>
  <node id="154281" label="HS3ST3B1" cy:nodeId="105841">
    <graphics y="1097.8121076204948" z="0.0" x="446.60893804751913"/>
  </node>
  <node id="154149" label="EXTL2" cy:nodeId="105844">
    <graphics y="1053.5633283236198" z="0.0" x="1176.1386316510348"/>
  </node>
  <node id="154209" label="HIF1A" cy:nodeId="106867">
    <graphics y="997.8879132845573" z="0.0" x="1796.4549158307223"/>
  </node>
  <node id="154379" label="ARSB" cy:nodeId="105843">
    <graphics y="1015.8882794954948" z="0.0" x="619.5209558697848"/>
  </node>
  <node id="154077" label="SLC35B4" cy:nodeId="105845">
    <graphics y="605.8040509798698" z="0.0" x="463.98674566470663"/>
  </node>
  <node id="154249" label="FLI1" cy:nodeId="105848">
    <graphics y="1157.8038068392448" z="0.0" x="526.8966272565035"/>
  </node>
  <node id="154250" label="FANCD2" cy:nodeId="105847">
    <graphics y="-1511.2878679654427" z="0.0" x="-372.83173578060587"/>
  </node>
  <node id="154112" label="UGT1A1" cy:nodeId="116602">
    <graphics y="-1578.3680681607552" z="0.0" x="50.071050474276944"/>
  </node>
  <node id="154179" label="KDM4A" cy:nodeId="106874">
    <graphics y="-992.4031023404427" z="0.0" x="11.299817869296476"/>
  </node>
  <node id="154163" label="MAF" cy:nodeId="106876">
    <graphics y="1076.7132306673698" z="0.0" x="581.8943689557223"/>
  </node>
  <node id="154170" label="LEF1" cy:nodeId="106875">
    <graphics y="948.2572980501823" z="0.0" x="715.3422449322848"/>
  </node>
  <node id="154308" label="GLCE" cy:nodeId="105851">
    <graphics y="-630.341884078724" z="0.0" x="779.2271326275973"/>
  </node>
  <node id="154148" label="MEIS3" cy:nodeId="106878">
    <graphics y="791.0796247103385" z="0.0" x="304.17802984439413"/>
  </node>
  <node id="154247" label="FOXA2" cy:nodeId="116606">
    <graphics y="-1036.494960250599" z="0.0" x="-844.9289953020902"/>
  </node>
  <node id="154299" label="RPN2" cy:nodeId="105854">
    <graphics y="-1138.7328142545052" z="0.0" x="-769.2303258684965"/>
  </node>
  <node id="154153" label="MEF2B" cy:nodeId="106877">
    <graphics y="1422.0583234408073" z="0.0" x="180.23520452701132"/>
  </node>
  <node id="154242" label="FOXM1" cy:nodeId="105853">
    <graphics y="-1112.519374313099" z="0.0" x="-402.58976190365274"/>
  </node>
  <node id="154240" label="FOXO1" cy:nodeId="105856">
    <graphics y="626.1745954134635" z="0.0" x="589.728048154941"/>
  </node>
  <node id="154104" label="GNPNAT1" cy:nodeId="105855">
    <graphics y="-1191.8155779263802" z="0.0" x="318.798360654941"/>
  </node>
  <node id="154292" label="ALG6" cy:nodeId="106879">
    <graphics y="-1220.7976335904427" z="0.0" x="52.18188268863241"/>
  </node>
  <node id="154172" label="GFPT1" cy:nodeId="106882">
    <graphics y="-419.88140434239585" z="0.0" x="-460.7032262591215"/>
  </node>
  <node id="154238" label="FOXP3" cy:nodeId="105858">
    <graphics y="1120.0082746126823" z="0.0" x="261.8226526471285"/>
  </node>
  <node id="154114" label="PPARA" cy:nodeId="106881">
    <graphics y="-294.8119615933724" z="0.0" x="-588.6393224505277"/>
  </node>
  <node id="154377" label="DSEL" cy:nodeId="105857">
    <graphics y="902.749180374401" z="0.0" x="781.7156580182223"/>
  </node>
  <node id="154110" label="RARA" cy:nodeId="106884">
    <graphics y="1594.3342023470573" z="0.0" x="278.95686895572226"/>
  </node>
  <node id="154236" label="NPL" cy:nodeId="105860">
    <graphics y="1211.3113751986198" z="0.0" x="179.1359308453707"/>
  </node>
  <node id="154283" label="SULF1" cy:nodeId="106883">
    <graphics y="960.0715070345573" z="0.0" x="931.102071592441"/>
  </node>
  <node id="154387" label="HK3" cy:nodeId="105859">
    <graphics y="1003.8658185579948" z="0.0" x="41.943425962558194"/>
  </node>
  <node id="154232" label="GATA6" cy:nodeId="105862">
    <graphics y="1915.2663312533073" z="0.0" x="-1613.8540136126371"/>
  </node>
  <node id="154096" label="SIRT6" cy:nodeId="106885">
    <graphics y="-1469.6360124966927" z="0.0" x="-1310.9155675677152"/>
  </node>
  <node id="154235" label="GABPA" cy:nodeId="105861">
    <graphics y="-16.553897323352885" z="0.0" x="569.1299646588473"/>
  </node>
  <node id="154088" label="SPIB" cy:nodeId="106888">
    <graphics y="1380.6435285189323" z="0.0" x="420.36153204165976"/>
  </node>
  <node id="154375" label="EXTL1" cy:nodeId="106887">
    <graphics y="1316.3468976595573" z="0.0" x="658.231954404941"/>
  </node>
  <node id="154061" label="THAP11" cy:nodeId="106890">
    <graphics y="2176.423740921276" z="0.0" x="-1456.8732244280668"/>
  </node>
  <node id="154228" label="GLYR1" cy:nodeId="105866">
    <graphics y="-1259.2600359341927" z="0.0" x="-1761.6340734270902"/>
  </node>
  <node id="154229" label="GLI2" cy:nodeId="105865">
    <graphics y="1262.9660382845573" z="0.0" x="1309.2420252057223"/>
  </node>
  <node id="154221" label="GTF2B" cy:nodeId="105868">
    <graphics y="-2173.2551531216927" z="0.0" x="-593.5855504778715"/>
  </node>
  <node id="154060" label="COG8" cy:nodeId="106891">
    <graphics y="2185.721317825573" z="0.0" x="-1357.3063985613676"/>
  </node>
  <node id="154227" label="ALG1" cy:nodeId="105867">
    <graphics y="-1234.9214128873177" z="0.0" x="-1572.8491613177152"/>
  </node>
  <node id="154312" label="STT3A" cy:nodeId="106893">
    <graphics y="1924.5639081576041" z="0.0" x="-516.4530584124418"/>
  </node>
  <node id="154216" label="H2AFX" cy:nodeId="105872">
    <graphics y="-1256.1198992154427" z="0.0" x="-1057.884256532559"/>
  </node>
  <node id="154220" label="GTF2I" cy:nodeId="105871">
    <graphics y="-605.6621660611459" z="0.0" x="-91.89997308529337"/>
  </node>
  <node id="154366" label="PIGO" cy:nodeId="105874">
    <graphics y="-858.8005632779427" z="0.0" x="-356.0264684466215"/>
  </node>
  <node id="154214" label="HCFC1" cy:nodeId="105873">
    <graphics y="-760.8188738248177" z="0.0" x="7.07886678897421"/>
  </node>
  <node id="154211" label="HECTD1" cy:nodeId="105875">
    <graphics y="-1391.1977800748177" z="0.0" x="1242.3931482525973"/>
  </node>
  <node id="154215" label="DPAGT1" cy:nodeId="105878">
    <graphics y="-1371.9382585904427" z="0.0" x="-1221.0149328020902"/>
  </node>
  <node id="154260" label="TSTA3" cy:nodeId="105880">
    <graphics y="-1055.2920183560677" z="0.0" x="-1496.3794347552152"/>
  </node>
  <node id="154192" label="HSF1" cy:nodeId="105879">
    <graphics y="-1217.8182634732552" z="0.0" x="-1284.7629796770902"/>
  </node>
  <node id="154189" label="IKZF1" cy:nodeId="105882">
    <graphics y="1185.2771955111198" z="0.0" x="293.448018858066"/>
  </node>
  <node id="154296" label="GPAA1" cy:nodeId="105881">
    <graphics y="-1175.0108904263802" z="0.0" x="-1069.7580968645902"/>
  </node>
  <node id="154237" label="LIPA" cy:nodeId="105884">
    <graphics y="1307.9869123079948" z="0.0" x="107.67505438052694"/>
  </node>
  <node id="154317" label="GM2A" cy:nodeId="105883">
    <graphics y="1059.5119367220573" z="0.0" x="282.9654443951754"/>
  </node>
  <node id="154185" label="IRF4" cy:nodeId="105888">
    <graphics y="1147.8152814486198" z="0.0" x="327.25777227603476"/>
  </node>
  <node id="154186" label="IRF1" cy:nodeId="105887">
    <graphics y="1012.9754376986198" z="0.0" x="-120.06446283138712"/>
  </node>
  <node id="154183" label="JMJD1C" cy:nodeId="105892">
    <graphics y="-118.33314746831138" z="0.0" x="575.4982507916598"/>
  </node>
  <node id="154218" label="MGAT5" cy:nodeId="105893">
    <graphics y="-733.2406877896615" z="0.0" x="-96.80286233700235"/>
  </node>
  <node id="154288" label="GBGT1" cy:nodeId="105897">
    <graphics y="1340.4229474642448" z="0.0" x="771.760274717441"/>
  </node>
  <node id="154181" label="KDM1A" cy:nodeId="105901">
    <graphics y="-1624.7086443326302" z="0.0" x="-981.2157384661527"/>
  </node>
  <node id="154180" label="KDM3A" cy:nodeId="105903">
    <graphics y="-308.3650621793099" z="0.0" x="87.50337774478476"/>
  </node>
  <node id="154107" label="HS2ST1" cy:nodeId="105906">
    <graphics y="-736.4645647427865" z="0.0" x="308.27681524478476"/>
  </node>
  <node id="154392" label="GNS" cy:nodeId="105905">
    <graphics y="-86.88743728612144" z="0.0" x="307.79707891665976"/>
  </node>
  <node id="154335" label="B3GALNT2" cy:nodeId="105908">
    <graphics y="-580.2246355435677" z="0.0" x="322.84685308658163"/>
  </node>
  <node id="154165" label="LMO2" cy:nodeId="105909">
    <graphics y="1212.5049787142448" z="0.0" x="532.1361292096285"/>
  </node>
  <node id="154325" label="RENBP" cy:nodeId="105912">
    <graphics y="863.2353253939323" z="0.0" x="216.7850549908785"/>
  </node>
  <node id="154164" label="LYL1" cy:nodeId="105911">
    <graphics y="1076.0358625033073" z="0.0" x="361.93733770572226"/>
  </node>
  <node id="154161" label="MAFB" cy:nodeId="105914">
    <graphics y="589.5281720736198" z="0.0" x="257.8592432233004"/>
  </node>
  <node id="154160" label="MAZ" cy:nodeId="105916">
    <graphics y="-1201.7839617154427" z="0.0" x="-1188.7515050677152"/>
  </node>
  <node id="154256" label="MGAT4B" cy:nodeId="105918">
    <graphics y="-1062.1906389615365" z="0.0" x="-653.4166051653715"/>
  </node>
  <node id="154190" label="B4GALT2" cy:nodeId="105917">
    <graphics y="-1119.1750139615365" z="0.0" x="-1315.5997716692777"/>
  </node>
  <node id="154175" label="ST6GALNAC1" cy:nodeId="105920">
    <graphics y="-1432.4023699185677" z="0.0" x="921.0891931744723"/>
  </node>
  <node id="154158" label="MECOM" cy:nodeId="105919">
    <graphics y="-1312.4878191373177" z="0.0" x="828.4147546979098"/>
  </node>
  <node id="154182" label="IDS" cy:nodeId="105922">
    <graphics y="472.20932441736977" z="0.0" x="667.332052061191"/>
  </node>
  <node id="154402" label="ARID3A" cy:nodeId="107970">
    <graphics y="-721.9235491177865" z="0.0" x="-529.2100621966215"/>
  </node>
  <node id="154156" label="MECP2" cy:nodeId="105921">
    <graphics y="1181.2630353548698" z="0.0" x="903.315938779941"/>
  </node>
  <node id="154263" label="NDST1" cy:nodeId="105923">
    <graphics y="1023.2393537142448" z="0.0" x="526.8036707135348"/>
  </node>
  <node id="154152" label="MEF2C" cy:nodeId="105926">
    <graphics y="985.6261945345573" z="0.0" x="773.7027796002535"/>
  </node>
  <node id="154154" label="MEF2A" cy:nodeId="105925">
    <graphics y="1084.4603009798698" z="0.0" x="895.0501306744723"/>
  </node>
  <node id="154150" label="MEIS1" cy:nodeId="105928">
    <graphics y="1048.2052960970573" z="0.0" x="771.3461511822848"/>
  </node>
  <node id="154371" label="SLC35F1" cy:nodeId="105927">
    <graphics y="1004.7321515658073" z="0.0" x="864.4624841900973"/>
  </node>
  <node id="154147" label="MRE11A" cy:nodeId="105931">
    <graphics y="-998.148280563099" z="0.0" x="-344.3460790423246"/>
  </node>
  <node id="154357" label="SLC35F2" cy:nodeId="107979">
    <graphics y="1915.2663312533073" z="0.0" x="-815.5867101458402"/>
  </node>
  <node id="154334" label="CDX2" cy:nodeId="107982">
    <graphics y="-1354.5365251920052" z="0.0" x="-269.0798436907621"/>
  </node>
  <node id="154146" label="MXD3" cy:nodeId="105933">
    <graphics y="-1604.5383562466927" z="0.0" x="-1219.8644201067777"/>
  </node>
  <node id="154245" label="CTSA" cy:nodeId="107984">
    <graphics y="-409.3363909146615" z="0.0" x="-1056.4615880755277"/>
  </node>
  <node id="154300" label="RPN1" cy:nodeId="105936">
    <graphics y="-1339.6628679654427" z="0.0" x="-846.4667150286527"/>
  </node>
  <node id="154144" label="MYBL2" cy:nodeId="105935">
    <graphics y="-1199.0162615201302" z="0.0" x="-968.3403722552152"/>
  </node>
  <node id="154333" label="B3GNT8" cy:nodeId="107983">
    <graphics y="-1704.1426042935677" z="0.0" x="-199.96962945736368"/>
  </node>
  <node id="154301" label="SLC35C2" cy:nodeId="107986">
    <graphics y="-958.3395647427865" z="0.0" x="-900.763406923184"/>
  </node>
  <node id="154143" label="MYH11" cy:nodeId="105937">
    <graphics y="946.2948957064323" z="0.0" x="1070.4612634869723"/>
  </node>
  <node id="154246" label="FOXD2" cy:nodeId="107988">
    <graphics y="-289.9780687711068" z="0.0" x="-1166.8882238177152"/>
  </node>
  <node id="154162" label="B4GALNT1" cy:nodeId="107990">
    <graphics y="711.0517316439323" z="0.0" x="828.2112634869723"/>
  </node>
  <node id="154373" label="ST6GALNAC5" cy:nodeId="107989">
    <graphics y="966.7460675814323" z="0.0" x="657.607198545566"/>
  </node>
  <node id="154128" label="ALG14" cy:nodeId="107992">
    <graphics y="2176.423740921276" z="0.0" x="-1856.0068761614652"/>
  </node>
  <node id="154230" label="GLI1" cy:nodeId="107991">
    <graphics y="1119.9583478548698" z="0.0" x="980.998067686191"/>
  </node>
  <node id="154206" label="HNF1B" cy:nodeId="107994">
    <graphics y="2176.423740921276" z="0.0" x="-1656.440050294766"/>
  </node>
  <node id="154140" label="NFIC" cy:nodeId="105945">
    <graphics y="1290.6664777376823" z="0.0" x="959.8974207135348"/>
  </node>
  <node id="154210" label="HEYL" cy:nodeId="107993">
    <graphics y="1450.7045636751823" z="0.0" x="916.4894006940035"/>
  </node>
  <node id="154139" label="NIPBL" cy:nodeId="105947">
    <graphics y="-411.15517753575523" z="0.0" x="221.801290342441"/>
  </node>
  <node id="154204" label="HNF4A" cy:nodeId="107995">
    <graphics y="-894.6996721646615" z="0.0" x="-618.7204992083402"/>
  </node>
  <node id="154065" label="ST3GAL4" cy:nodeId="107998">
    <graphics y="1525.6302228548698" z="0.0" x="777.5966394635348"/>
  </node>
  <node id="154202" label="SLC35D1" cy:nodeId="105950">
    <graphics y="-840.966639938099" z="0.0" x="-769.4589025286527"/>
  </node>
  <node id="154137" label="NR2C2" cy:nodeId="105949">
    <graphics y="-413.4264788052865" z="0.0" x="376.4681299420504"/>
  </node>
  <node id="154136" label="NR2F1" cy:nodeId="105951">
    <graphics y="1216.5501447298698" z="0.0" x="743.7433679791598"/>
  </node>
  <node id="154176" label="B3GNT6" cy:nodeId="107999">
    <graphics y="-1629.8875994107552" z="0.0" x="1089.5122888775973"/>
  </node>
  <node id="154115" label="PIGM" cy:nodeId="105954">
    <graphics y="-530.8552507779427" z="0.0" x="-342.452371766934"/>
  </node>
  <node id="154131" label="PBX1" cy:nodeId="105953">
    <graphics y="912.7278791048698" z="0.0" x="880.5044763775973"/>
  </node>
  <node id="154126" label="PHF20" cy:nodeId="105956">
    <graphics y="-604.1702837369271" z="0.0" x="-575.2519933489652"/>
  </node>
  <node id="154129" label="PCGF1" cy:nodeId="105955">
    <graphics y="2185.721317825573" z="0.0" x="-1756.440050294766"/>
  </node>
  <node id="154194" label="GCNT3" cy:nodeId="108003">
    <graphics y="1924.5639081576041" z="0.0" x="-117.31940667904337"/>
  </node>
  <node id="154125" label="PHF6" cy:nodeId="105957">
    <graphics y="-1426.2516130826302" z="0.0" x="114.84651739322226"/>
  </node>
  <node id="154197" label="SLC17A5" cy:nodeId="108005">
    <graphics y="-1577.7735857388802" z="0.0" x="388.7003076764254"/>
  </node>
  <node id="154117" label="POLR3A" cy:nodeId="105960">
    <graphics y="-753.765956344349" z="0.0" x="144.60191900455038"/>
  </node>
  <node id="154224" label="DAD1" cy:nodeId="108008">
    <graphics y="-664.5594744107552" z="0.0" x="-1439.0564367083402"/>
  </node>
  <node id="154122" label="POLR2B" cy:nodeId="105959">
    <graphics y="-650.371180953724" z="0.0" x="189.87500555240194"/>
  </node>
  <node id="154111" label="PRDM1" cy:nodeId="105962">
    <graphics y="916.4472394564323" z="0.0" x="416.49529058658163"/>
  </node>
  <node id="154253" label="CHST1" cy:nodeId="108010">
    <graphics y="961.0248761751823" z="0.0" x="582.5854089947848"/>
  </node>
  <node id="154113" label="PPARG" cy:nodeId="105961">
    <graphics y="-1341.7346453091927" z="0.0" x="24.962903806796476"/>
  </node>
  <node id="154345" label="CHST8" cy:nodeId="108011">
    <graphics y="1016.4732404329948" z="0.0" x="965.1394861432223"/>
  </node>
  <node id="154071" label="UGGT2" cy:nodeId="105966">
    <graphics y="-958.2206682584115" z="0.0" x="394.03850347720663"/>
  </node>
  <node id="154166" label="MGAT5B" cy:nodeId="108014">
    <graphics y="1076.7657209017448" z="0.0" x="1056.8252771588473"/>
  </node>
  <node id="154109" label="RB1" cy:nodeId="105965">
    <graphics y="-500.34856742833335" z="0.0" x="65.44868261539023"/>
  </node>
  <node id="154168" label="CHST10" cy:nodeId="108013">
    <graphics y="827.9634748079948" z="0.0" x="944.927022764316"/>
  </node>
</graph>
