# Supplementary material for: A systems-based framework to computationally describe putative transcription factors and signaling pathways regulating glycan biosynthesis
Source: publisher site journal article supplement (doi:10.3762/bjoc.17.119), 2021-07-22
Supplement: Additional file 2 [file 1860-5397-17-119-S2.cys › CytoscapeSession-2021_03_21-12_01/views/123839-150618-TGCT.xgmml]

<?xml version="1.0" encoding="UTF-8" standalone="yes"?>
<graph id="150618" label="TGCT" cy:view="1" cy:networkId="123839" cy:visualStyle="default" cy:rendererId="org.cytoscape.ding" cy:documentVersion="3.0" xmlns:dc="http://purl.org/dc/elements/1.1/" xmlns:xlink="http://www.w3.org/1999/xlink" xmlns:rdf="http://www.w3.org/1999/02/22-rdf-syntax-ns#" xmlns:cy="http://www.cytoscape.org" xmlns="http://www.cs.rpi.edu/XGMML">
  <graphics>
    <att name="NETWORK_NODE_SELECTION" value="true" type="string" cy:type="String"/>
    <att name="NETWORK_CENTER_X_LOCATION" value="544.7510375976562" type="string" cy:type="String"/>
    <att name="NETWORK_HEIGHT" value="510.0" type="string" cy:type="String"/>
    <att name="NETWORK_TITLE" value="TGCT" type="string" cy:type="String"/>
    <att name="NETWORK_EDGE_SELECTION" value="true" type="string" cy:type="String"/>
    <att name="NETWORK_CENTER_Y_LOCATION" value="23.8009033203125" type="string" cy:type="String"/>
    <att name="NETWORK_WIDTH" value="1312.0" type="string" cy:type="String"/>
    <att name="NETWORK_DEPTH" value="0.0" type="string" cy:type="String"/>
    <att name="NETWORK_SCALE_FACTOR" value="0.16343860420590103" type="string" cy:type="String"/>
    <att name="NETWORK_ANNOTATION_SELECTION" value="false" type="string" cy:type="String"/>
    <att name="NETWORK_CENTER_Z_LOCATION" value="0.0" type="string" cy:type="String"/>
  </graphics>
  <node id="150694" label="RBBP5" cy:nodeId="105967">
    <graphics y="555.772055248581" z="0.0" x="-421.03931455172824"/>
  </node>
  <node id="150693" label="RCOR1" cy:nodeId="105969">
    <graphics y="1049.6976533931122" z="0.0" x="-96.40843801059054"/>
  </node>
  <node id="150953" label="ATF5" cy:nodeId="111091">
    <graphics y="-729.5252469975128" z="0.0" x="-614.5938799814157"/>
  </node>
  <node id="150692" label="RFX7" cy:nodeId="105974">
    <graphics y="827.6781831782685" z="0.0" x="-624.4366534189157"/>
  </node>
  <node id="150696" label="PRDM4" cy:nodeId="108021">
    <graphics y="825.5790010493622" z="0.0" x="-785.524360938447"/>
  </node>
  <node id="150705" label="COG2" cy:nodeId="105973">
    <graphics y="1202.0320039790497" z="0.0" x="-465.5079119638376"/>
  </node>
  <node id="150906" label="CAMTA2" cy:nodeId="111093">
    <graphics y="-744.681802173294" z="0.0" x="-1293.5007403329782"/>
  </node>
  <node id="150880" label="FPGT" cy:nodeId="105976">
    <graphics y="180.98726520951845" z="0.0" x="-618.932808204072"/>
  </node>
  <node id="150691" label="RNF2" cy:nodeId="105975">
    <graphics y="569.882650951706" z="0.0" x="-542.9356463388376"/>
  </node>
  <node id="150837" label="GLA" cy:nodeId="108026">
    <graphics y="-696.320474048294" z="0.0" x="2066.7387616201468"/>
  </node>
  <node id="150808" label="SULF2" cy:nodeId="105979">
    <graphics y="-652.4159940678253" z="0.0" x="2587.1730877920218"/>
  </node>
  <node id="150690" label="RUNX3" cy:nodeId="105982">
    <graphics y="-1189.2447294193878" z="0.0" x="-726.647896094697"/>
  </node>
  <node id="150658" label="STAT5B" cy:nodeId="108029">
    <graphics y="-279.421533008255" z="0.0" x="-898.8208697275095"/>
  </node>
  <node id="150687" label="SIN3A" cy:nodeId="105984">
    <graphics y="467.57356892045595" z="0.0" x="-376.97937802829074"/>
  </node>
  <node id="150737" label="B3GNT9" cy:nodeId="108032">
    <graphics y="176.48018513139345" z="0.0" x="-994.7287676767282"/>
  </node>
  <node id="150649" label="TCF21" cy:nodeId="108031">
    <graphics y="-1300.5204862553253" z="0.0" x="1205.6674725576468"/>
  </node>
  <node id="150685" label="SIX5" cy:nodeId="105986">
    <graphics y="402.47774372514345" z="0.0" x="-849.2888262704782"/>
  </node>
  <node id="150679" label="B3GALT5" cy:nodeId="108034">
    <graphics y="963.0665498774872" z="0.0" x="-229.71387509860324"/>
  </node>
  <node id="150746" label="KLF10" cy:nodeId="111106">
    <graphics y="749.4732881587372" z="0.0" x="101.24431581936551"/>
  </node>
  <node id="150755" label="ARSA" cy:nodeId="111105">
    <graphics y="-1126.1036161381378" z="0.0" x="-910.6834795907907"/>
  </node>
  <node id="150912" label="UGCG" cy:nodeId="105985">
    <graphics y="719.7436739009247" z="0.0" x="-289.0467303232126"/>
  </node>
  <node id="150639" label="TFDP1" cy:nodeId="108036">
    <graphics y="-53.93172587934873" z="0.0" x="1356.6092450185843"/>
  </node>
  <node id="150644" label="TEAD4" cy:nodeId="108035">
    <graphics y="-410.05187358442686" z="0.0" x="1302.8176190420218"/>
  </node>
  <node id="150680" label="SMC3" cy:nodeId="105990">
    <graphics y="612.9256807368622" z="0.0" x="-412.82007627047824"/>
  </node>
  <node id="150700" label="POU5F1" cy:nodeId="111110">
    <graphics y="-480.04203166548155" z="0.0" x="1079.9504315420218"/>
  </node>
  <node id="150956" label="ATF4" cy:nodeId="108550">
    <graphics y="-1059.250161548294" z="0.0" x="970.7558514638968"/>
  </node>
  <node id="150681" label="SMC1A" cy:nodeId="105989">
    <graphics y="494.74849567826845" z="0.0" x="-144.4030001596384"/>
  </node>
  <node id="150675" label="SOX17" cy:nodeId="105992">
    <graphics y="189.96831379350283" z="0.0" x="-1085.7069170907907"/>
  </node>
  <node id="150921" label="GCNT1" cy:nodeId="108552">
    <graphics y="88.19544086869814" z="0.0" x="-895.6190264657907"/>
  </node>
  <node id="150980" label="UGDH" cy:nodeId="108551">
    <graphics y="-14.92994060102842" z="0.0" x="1423.9171063467093"/>
  </node>
  <node id="150669" label="SRCAP" cy:nodeId="105994">
    <graphics y="1088.0503145259247" z="0.0" x="-1089.2513506845407"/>
  </node>
  <node id="150941" label="BACH2" cy:nodeId="108553">
    <graphics y="-49.533669849075295" z="0.0" x="-335.56153134860324"/>
  </node>
  <node id="150630" label="TTF1" cy:nodeId="111116">
    <graphics y="1122.2249971431122" z="0.0" x="-177.849312110322"/>
  </node>
  <node id="150896" label="GANAB" cy:nodeId="105998">
    <graphics y="861.9811616938935" z="0.0" x="149.5424115224905"/>
  </node>
  <node id="150622" label="YBX1" cy:nodeId="111117">
    <graphics y="-831.2991117436065" z="0.0" x="972.7203290029593"/>
  </node>
  <node id="150667" label="SSRP1" cy:nodeId="105997">
    <graphics y="66.59158955033877" z="0.0" x="1234.0168377920218"/>
  </node>
  <node id="150665" label="STAT1" cy:nodeId="105999">
    <graphics y="-655.6279996830597" z="0.0" x="-885.667915625947"/>
  </node>
  <node id="150844" label="GALE" cy:nodeId="108559">
    <graphics y="-639.3835233647003" z="0.0" x="1715.1987225576468"/>
  </node>
  <node id="150661" label="STAT4" cy:nodeId="106002">
    <graphics y="-776.0353788334503" z="0.0" x="-827.438423438447"/>
  </node>
  <node id="150899" label="CCNT2" cy:nodeId="108562">
    <graphics y="587.760336498581" z="0.0" x="-1183.2442706064157"/>
  </node>
  <node id="150662" label="STAT2" cy:nodeId="106001">
    <graphics y="-89.96414317671201" z="0.0" x="-760.9644244150095"/>
  </node>
  <node id="150831" label="GALNT6" cy:nodeId="108561">
    <graphics y="822.0094209712372" z="0.0" x="-518.560005469697"/>
  </node>
  <node id="150656" label="SUMO2" cy:nodeId="106004">
    <graphics y="-534.0823759037628" z="0.0" x="973.7534100576468"/>
  </node>
  <node id="150660" label="STAT5A" cy:nodeId="106003">
    <graphics y="-922.1667264897003" z="0.0" x="-969.580513282197"/>
  </node>
  <node id="150654" label="TAF1" cy:nodeId="106006">
    <graphics y="415.90938435014345" z="0.0" x="-386.25736264743136"/>
  </node>
  <node id="150657" label="COG1" cy:nodeId="106005">
    <graphics y="-284.42416514936826" z="0.0" x="-1083.395454688447"/>
  </node>
  <node id="150870" label="CSNK2A1" cy:nodeId="108568">
    <graphics y="674.3891817134247" z="0.0" x="25.10062380276395"/>
  </node>
  <node id="150648" label="TCF7L1" cy:nodeId="106009">
    <graphics y="-392.22904338423155" z="0.0" x="1669.1945721670218"/>
  </node>
  <node id="150901" label="SLC35B2" cy:nodeId="108572">
    <graphics y="400.80769977983095" z="0.0" x="-1494.7039874032907"/>
  </node>
  <node id="150645" label="TDRD3" cy:nodeId="106011">
    <graphics y="-82.21746959272764" z="0.0" x="-442.94034604586886"/>
  </node>
  <node id="150859" label="DR1" cy:nodeId="108571">
    <graphics y="-950.0237821537628" z="0.0" x="1689.5169598623343"/>
  </node>
  <node id="150925" label="GALNT1" cy:nodeId="106014">
    <graphics y="12.21306477006533" z="0.0" x="-883.9625323251657"/>
  </node>
  <node id="150858" label="E2F2" cy:nodeId="108573">
    <graphics y="574.0960908931122" z="0.0" x="-970.3315508798532"/>
  </node>
  <node id="150643" label="TET2" cy:nodeId="106016">
    <graphics y="111.3271699946747" z="0.0" x="-804.8980181650095"/>
  </node>
  <node id="150851" label="EBNA1BP2" cy:nodeId="108576">
    <graphics y="-56.82363261762998" z="0.0" x="1238.1552655263968"/>
  </node>
  <node id="150855" label="E2F8" cy:nodeId="108575">
    <graphics y="1045.1445528071747" z="0.0" x="305.817924217803"/>
  </node>
  <node id="150807" label="EXT1" cy:nodeId="108580">
    <graphics y="-396.04007854048155" z="0.0" x="1769.0373456045218"/>
  </node>
  <node id="150629" label="TTF2" cy:nodeId="106019">
    <graphics y="717.1884981196747" z="0.0" x="-189.9677737192087"/>
  </node>
  <node id="150627" label="USF2" cy:nodeId="106022">
    <graphics y="-1090.7722562748565" z="0.0" x="-1426.2392657236032"/>
  </node>
  <node id="150628" label="USF1" cy:nodeId="106021">
    <graphics y="-1123.2997831303253" z="0.0" x="548.819633202178"/>
  </node>
  <node id="150828" label="ETV4" cy:nodeId="108581">
    <graphics y="-326.7813810307159" z="0.0" x="1492.5270916982718"/>
  </node>
  <node id="150984" label="UGP2" cy:nodeId="108584">
    <graphics y="-464.7557157475128" z="0.0" x="1387.8447186513968"/>
  </node>
  <node id="150721" label="CHPF" cy:nodeId="108583">
    <graphics y="-662.3755582768097" z="0.0" x="1284.3759686513968"/>
  </node>
  <node id="150624" label="XRN2" cy:nodeId="106025">
    <graphics y="625.1610322993622" z="0.0" x="-229.07988767184543"/>
  </node>
  <node id="150621" label="YY1" cy:nodeId="106028">
    <graphics y="1062.0290742915497" z="0.0" x="-289.3982165292673"/>
  </node>
  <node id="150907" label="B3GALT4" cy:nodeId="106030">
    <graphics y="-865.4040311772003" z="0.0" x="-769.8086016611032"/>
  </node>
  <node id="150788" label="HBP1" cy:nodeId="108591">
    <graphics y="655.127523998581" z="0.0" x="-898.8636553720407"/>
  </node>
  <node id="150767" label="HIRA" cy:nodeId="108595">
    <graphics y="477.7276826899872" z="0.0" x="82.44271059475614"/>
  </node>
  <node id="150825" label="ETV7" cy:nodeId="118329">
    <graphics y="-1205.8475126225128" z="0.0" x="-601.230903907197"/>
  </node>
  <node id="150919" label="PIGP" cy:nodeId="113212">
    <graphics y="232.33074055131533" z="0.0" x="-782.5369952157907"/>
  </node>
  <node id="150728" label="NCOR1" cy:nodeId="108603">
    <graphics y="776.4858614009247" z="0.0" x="1366.5707928701468"/>
  </node>
  <node id="150922" label="B3GAT2" cy:nodeId="108606">
    <graphics y="46.68895588334658" z="0.0" x="-747.3459551767282"/>
  </node>
  <node id="150646" label="GALNT9" cy:nodeId="108605">
    <graphics y="-384.95848979536436" z="0.0" x="1900.7401043935843"/>
  </node>
  <node id="150714" label="OVOL2" cy:nodeId="118336">
    <graphics y="-767.8066190678253" z="0.0" x="1291.0384442373343"/>
  </node>
  <node id="150842" label="B3GAT1" cy:nodeId="113216">
    <graphics y="-564.1109708744659" z="0.0" x="2115.0305096670218"/>
  </node>
  <node id="150703" label="POLR3D" cy:nodeId="108609">
    <graphics y="809.1474214595185" z="0.0" x="-324.7228014902048"/>
  </node>
  <node id="150929" label="GMDS" cy:nodeId="113219">
    <graphics y="-1068.2893461186065" z="0.0" x="1885.7307049795218"/>
  </node>
  <node id="150838" label="CHST4" cy:nodeId="113221">
    <graphics y="-374.1221250492706" z="0.0" x="1556.1625897451468"/>
  </node>
  <node id="150688" label="SFMBT1" cy:nodeId="108615">
    <graphics y="274.1878877681122" z="0.0" x="-566.7282488779001"/>
  </node>
  <node id="150678" label="SNAPC1" cy:nodeId="108618">
    <graphics y="996.3322969477997" z="0.0" x="-678.8819659189157"/>
  </node>
  <node id="150655" label="SUPT5H" cy:nodeId="108622">
    <graphics y="311.1535554927216" z="0.0" x="-802.3277667001657"/>
  </node>
  <node id="150711" label="PCGF6" cy:nodeId="113232">
    <graphics y="1374.1579805415497" z="0.0" x="-1424.1039126352243"/>
  </node>
  <node id="150652" label="TAF7" cy:nodeId="108623">
    <graphics y="823.436850170456" z="0.0" x="-1118.7525713876657"/>
  </node>
  <node id="150635" label="THAP1" cy:nodeId="108626">
    <graphics y="639.2533174556122" z="0.0" x="-1044.6060870126657"/>
  </node>
  <node id="150641" label="TFAM" cy:nodeId="113234">
    <graphics y="814.6977144282685" z="0.0" x="715.3514935537405"/>
  </node>
  <node id="150638" label="TFE3" cy:nodeId="108625">
    <graphics y="-615.0348600346222" z="0.0" x="2806.2123944326468"/>
  </node>
  <node id="150631" label="TRRAP" cy:nodeId="108628">
    <graphics y="916.7022920649872" z="0.0" x="-743.697700782197"/>
  </node>
  <node id="150625" label="USP49" cy:nodeId="113235">
    <graphics y="916.2417207759247" z="0.0" x="-584.6108172372751"/>
  </node>
  <node id="150890" label="HEXA" cy:nodeId="112216">
    <graphics y="-853.4921659428253" z="0.0" x="-1357.6374590829782"/>
  </node>
  <node id="150863" label="DDX5" cy:nodeId="112218">
    <graphics y="498.7334199946747" z="0.0" x="-930.3670123056345"/>
  </node>
  <node id="150797" label="GLIS3" cy:nodeId="112220">
    <graphics y="139.0698457759247" z="0.0" x="-1531.1727374032907"/>
  </node>
  <node id="150777" label="HEXIM1" cy:nodeId="112221">
    <graphics y="-890.7095731693878" z="0.0" x="2527.9077069326468"/>
  </node>
  <node id="150741" label="L3MBTL2" cy:nodeId="112224">
    <graphics y="1044.9637666743622" z="0.0" x="-933.9976275400095"/>
  </node>
  <node id="150889" label="ST6GALNAC2" cy:nodeId="112225">
    <graphics y="-959.0713895756378" z="0.0" x="-1279.6145098642282"/>
  </node>
  <node id="150712" label="PALB2" cy:nodeId="112228">
    <graphics y="170.07146320756533" z="0.0" x="-402.34415463961886"/>
  </node>
  <node id="150764" label="B4GALT4" cy:nodeId="112227">
    <graphics y="-34.291299243606545" z="0.0" x="1643.8990399404593"/>
  </node>
  <node id="150742" label="ALG2" cy:nodeId="109671">
    <graphics y="1274.1579805415497" z="0.0" x="-294.140327735322"/>
  </node>
  <node id="150809" label="GATA3" cy:nodeId="109677">
    <graphics y="-671.5134061772003" z="0.0" x="2220.8276288076468"/>
  </node>
  <node id="150668" label="PIGG" cy:nodeId="109689">
    <graphics y="1246.5813203852997" z="0.0" x="-1224.2745440439157"/>
  </node>
  <node id="150636" label="TGIF1" cy:nodeId="109691">
    <graphics y="-498.49308147016905" z="0.0" x="1727.5121991201468"/>
  </node>
  <node id="150766" label="HMGN1" cy:nodeId="123043">
    <graphics y="-102.25121440473936" z="0.0" x="1453.7265545888968"/>
  </node>
  <node id="150928" label="BCOR" cy:nodeId="110788">
    <graphics y="598.7296968501435" z="0.0" x="104.25321169338895"/>
  </node>
  <node id="150986" label="AEBP2" cy:nodeId="110787">
    <graphics y="-183.9778837162628" z="0.0" x="1359.2626874013968"/>
  </node>
  <node id="150910" label="BTAF1" cy:nodeId="110789">
    <graphics y="-99.81261195722959" z="0.0" x="-577.089058204072"/>
  </node>
  <node id="150887" label="CEBPG" cy:nodeId="110791">
    <graphics y="475.06551227983095" z="0.0" x="-840.9862139657907"/>
  </node>
  <node id="150865" label="DDIT3" cy:nodeId="110793">
    <graphics y="-408.69808330122373" z="0.0" x="970.9417645498343"/>
  </node>
  <node id="150731" label="MNT" cy:nodeId="110801">
    <graphics y="500.04964313920595" z="0.0" x="-1062.2459795907907"/>
  </node>
  <node id="150905" label="SGSH" cy:nodeId="110804">
    <graphics y="-737.036538501419" z="0.0" x="-1000.080269141572"/>
  </node>
  <node id="150988" label="ADNP" cy:nodeId="105684">
    <graphics y="-1296.1418241459503" z="0.0" x="-827.951362891572"/>
  </node>
  <node id="150719" label="NME2" cy:nodeId="110803">
    <graphics y="-286.46295299116514" z="0.0" x="906.4071576162405"/>
  </node>
  <node id="150987" label="FUT7" cy:nodeId="105685">
    <graphics y="-972.2757352787628" z="0.0" x="-829.8399737314157"/>
  </node>
  <node id="150965" label="STT3B" cy:nodeId="105688">
    <graphics y="531.1883760493622" z="0.0" x="-466.94010190524386"/>
  </node>
  <node id="150718" label="NR1H3" cy:nodeId="110807">
    <graphics y="-489.5035489994659" z="0.0" x="-1036.5244219736032"/>
  </node>
  <node id="150971" label="MAN1A2" cy:nodeId="105687">
    <graphics y="499.3990694087372" z="0.0" x="-328.8469164804392"/>
  </node>
  <node id="150969" label="FUT11" cy:nodeId="105690">
    <graphics y="674.9911104243622" z="0.0" x="-320.285103125947"/>
  </node>
  <node id="150967" label="NEU3" cy:nodeId="105689">
    <graphics y="572.4672456782685" z="0.0" x="-263.61121396579074"/>
  </node>
  <node id="150676" label="SND1" cy:nodeId="110812">
    <graphics y="929.7749239009247" z="0.0" x="-453.89722470797824"/>
  </node>
  <node id="150964" label="COG5" cy:nodeId="105692">
    <graphics y="450.75020466264345" z="0.0" x="-631.2249834970407"/>
  </node>
  <node id="150677" label="SNAPC5" cy:nodeId="110811">
    <graphics y="1038.9039522212372" z="0.0" x="-778.8438189462595"/>
  </node>
  <node id="150968" label="ACER2" cy:nodeId="105691">
    <graphics y="613.4753633540497" z="0.0" x="-332.7724383310251"/>
  </node>
  <node id="150634" label="TOP1" cy:nodeId="110814">
    <graphics y="-799.8803495365753" z="0.0" x="774.6330487295218"/>
  </node>
  <node id="150970" label="MAN2A1" cy:nodeId="105694">
    <graphics y="564.9848238032685" z="0.0" x="-138.85361127414035"/>
  </node>
  <node id="150894" label="SLC35F5" cy:nodeId="105696">
    <graphics y="426.98457966264345" z="0.0" x="-87.22539262332248"/>
  </node>
  <node id="150945" label="SLC35A3" cy:nodeId="105695">
    <graphics y="69.58699665483095" z="0.0" x="748.8415448232718"/>
  </node>
  <node id="150786" label="RTF1" cy:nodeId="105700">
    <graphics y="338.4918428462372" z="0.0" x="-72.66988257922458"/>
  </node>
  <node id="150983" label="ARID2" cy:nodeId="105699">
    <graphics y="278.50224934037783" z="0.0" x="-1085.8718951181345"/>
  </node>
  <node id="150962" label="SLC35A5" cy:nodeId="105702">
    <graphics y="599.3991914790497" z="0.0" x="-591.5853350595407"/>
  </node>
  <node id="150972" label="ATF2" cy:nodeId="105704">
    <graphics y="485.80061970170595" z="0.0" x="-484.51456479586886"/>
  </node>
  <node id="150966" label="UGGT1" cy:nodeId="105705">
    <graphics y="515.6467500727997" z="0.0" x="-259.2329791025095"/>
  </node>
  <node id="150930" label="B3GNT5" cy:nodeId="105707">
    <graphics y="-758.361977954544" z="0.0" x="1691.3655926748343"/>
  </node>
  <node id="150949" label="ATF7IP" cy:nodeId="105710">
    <graphics y="242.21465168412783" z="0.0" x="554.541068749053"/>
  </node>
  <node id="150978" label="HAS2" cy:nodeId="105709">
    <graphics y="218.06185017045595" z="0.0" x="1722.0006024404593"/>
  </node>
  <node id="150946" label="ATRX" cy:nodeId="105712">
    <graphics y="88.73576984819033" z="0.0" x="501.24303408108426"/>
  </node>
  <node id="150948" label="ALG10" cy:nodeId="105711">
    <graphics y="152.0136934321747" z="0.0" x="834.869193749053"/>
  </node>
  <node id="150792" label="HS6ST3" cy:nodeId="114930">
    <graphics y="-103.21096171919248" z="0.0" x="1935.2142254873343"/>
  </node>
  <node id="150882" label="FKTN" cy:nodeId="105713">
    <graphics y="256.70625935014345" z="0.0" x="-401.2498248056345"/>
  </node>
  <node id="150926" label="CSGALNACT2" cy:nodeId="105715">
    <graphics y="-128.94758548323057" z="0.0" x="-821.1482012704782"/>
  </node>
  <node id="150673" label="GFPT2" cy:nodeId="105719">
    <graphics y="-574.2845243412628" z="0.0" x="1610.0865399404593"/>
  </node>
  <node id="150626" label="DPM3" cy:nodeId="105722">
    <graphics y="-1197.7134794193878" z="0.0" x="-1563.9426348642282"/>
  </node>
  <node id="150793" label="GRHL3" cy:nodeId="114938">
    <graphics y="-223.19377650801084" z="0.0" x="1726.8563153310843"/>
  </node>
  <node id="150940" label="BATF" cy:nodeId="105721">
    <graphics y="-850.5305570561065" z="0.0" x="-945.1540606454782"/>
  </node>
  <node id="150763" label="ID3" cy:nodeId="114940">
    <graphics y="-744.984048267044" z="0.0" x="1544.1190106435843"/>
  </node>
  <node id="150951" label="MGAT1" cy:nodeId="105724">
    <graphics y="-853.3046659428253" z="0.0" x="-883.4226763681345"/>
  </node>
  <node id="150780" label="HDAC8" cy:nodeId="114939">
    <graphics y="11.051596264205955" z="0.0" x="1770.3897625967093"/>
  </node>
  <node id="150927" label="BMI1" cy:nodeId="105726">
    <graphics y="202.61534748490908" z="0.0" x="-730.2542193368845"/>
  </node>
  <node id="150932" label="BCAT1" cy:nodeId="105725">
    <graphics y="-892.2439969975128" z="0.0" x="1789.0185467763968"/>
  </node>
  <node id="150810" label="ALG10B" cy:nodeId="105727">
    <graphics y="472.71297321733095" z="0.0" x="-211.0024645761423"/>
  </node>
  <node id="150874" label="PIGN" cy:nodeId="105730">
    <graphics y="443.8724580806122" z="0.0" x="-319.02169065036105"/>
  </node>
  <node id="150821" label="PIGW" cy:nodeId="105729">
    <graphics y="1425.9253145259247" z="0.0" x="-1518.067962928193"/>
  </node>
  <node id="150911" label="SLC35E3" cy:nodeId="105732">
    <graphics y="576.7148042720185" z="0.0" x="-192.81360654391574"/>
  </node>
  <node id="150963" label="FAM20B" cy:nodeId="105731">
    <graphics y="488.3646455806122" z="0.0" x="-764.805366797822"/>
  </node>
  <node id="150918" label="BRD1" cy:nodeId="105733">
    <graphics y="547.917318920456" z="0.0" x="-624.1424639657907"/>
  </node>
  <node id="150908" label="C17orf49" cy:nodeId="105736">
    <graphics y="-1027.0732816654815" z="0.0" x="-379.51966123141574"/>
  </node>
  <node id="150904" label="CASP8AP2" cy:nodeId="105738">
    <graphics y="744.3371797602997" z="0.0" x="-685.6256182626657"/>
  </node>
  <node id="150915" label="BRD2" cy:nodeId="107276">
    <graphics y="640.4579072993622" z="0.0" x="-500.3389666513376"/>
  </node>
  <node id="150947" label="FUT10" cy:nodeId="107278">
    <graphics y="273.2086092036591" z="0.0" x="184.140189842803"/>
  </node>
  <node id="150900" label="CBX3" cy:nodeId="105741">
    <graphics y="343.5388399165497" z="0.0" x="-731.5748370126657"/>
  </node>
  <node id="150914" label="BRD3" cy:nodeId="107277">
    <graphics y="1007.5465303462372" z="0.0" x="-538.5391619638376"/>
  </node>
  <node id="150860" label="HS3ST6" cy:nodeId="107280">
    <graphics y="1374.1579805415497" z="0.0" x="-1124.5370867685251"/>
  </node>
  <node id="150955" label="RFNG" cy:nodeId="105744">
    <graphics y="-829.8584379154815" z="0.0" x="1215.4080731435843"/>
  </node>
  <node id="150875" label="B4GALT5" cy:nodeId="107279">
    <graphics y="652.1436983149872" z="0.0" x="-370.9787371591501"/>
  </node>
  <node id="150701" label="MAN2A2" cy:nodeId="105748">
    <graphics y="-318.59984721723936" z="0.0" x="-1280.4372637704782"/>
  </node>
  <node id="150916" label="MGAT3" cy:nodeId="105750">
    <graphics y="696.554525951706" z="0.0" x="-764.7739336923532"/>
  </node>
  <node id="150852" label="IDUA" cy:nodeId="105749">
    <graphics y="-908.479409595169" z="0.0" x="-425.0579607919626"/>
  </node>
  <node id="150973" label="B3GAT3" cy:nodeId="105754">
    <graphics y="-1110.2156766850128" z="0.0" x="-160.25923947848605"/>
  </node>
  <node id="150713" label="GALK1" cy:nodeId="105753">
    <graphics y="-992.060952563919" z="0.0" x="1276.0609051748343"/>
  </node>
  <node id="150833" label="ERCC3" cy:nodeId="107292">
    <graphics y="932.3458467524872" z="0.0" x="-853.8938067392282"/>
  </node>
  <node id="150895" label="CDK8" cy:nodeId="105756">
    <graphics y="387.9985567134247" z="0.0" x="-203.7045672372751"/>
  </node>
  <node id="150954" label="DPM2" cy:nodeId="105758">
    <graphics y="-1198.4200223881378" z="0.0" x="760.6190106435843"/>
  </node>
  <node id="150642" label="TET3" cy:nodeId="118045">
    <graphics y="1029.6346651118622" z="0.0" x="-433.904732032197"/>
  </node>
  <node id="150672" label="HK1" cy:nodeId="107293">
    <graphics y="-571.8318265873565" z="0.0" x="1261.1960370107718"/>
  </node>
  <node id="150977" label="GCNT2" cy:nodeId="107296">
    <graphics y="-281.19503917280576" z="0.0" x="1356.8146893545218"/>
  </node>
  <node id="150817" label="FOXK1" cy:nodeId="107298">
    <graphics y="320.21147785600283" z="0.0" x="296.68123598538114"/>
  </node>
  <node id="150866" label="MOGS" cy:nodeId="105762">
    <graphics y="-251.45004405561826" z="0.0" x="1425.3983075185843"/>
  </node>
  <node id="150960" label="GNE" cy:nodeId="107297">
    <graphics y="334.00057087358095" z="0.0" x="-591.4097369150095"/>
  </node>
  <node id="150893" label="CEBPA" cy:nodeId="105764">
    <graphics y="-780.8003324467315" z="0.0" x="-1056.111275000947"/>
  </node>
  <node id="150724" label="CHST12" cy:nodeId="105763">
    <graphics y="-1032.920815845169" z="0.0" x="2129.5429608388968"/>
  </node>
  <node id="150789" label="GTF3C2" cy:nodeId="107302">
    <graphics y="161.79305134233095" z="0.0" x="306.4355694814749"/>
  </node>
  <node id="150848" label="MFNG" cy:nodeId="105766">
    <graphics y="-822.9872831303253" z="0.0" x="-789.4976885751657"/>
  </node>
  <node id="150939" label="NAGK" cy:nodeId="105765">
    <graphics y="-870.8572172123565" z="0.0" x="-1141.1805499032907"/>
  </node>
  <node id="150751" label="A4GALT" cy:nodeId="105768">
    <graphics y="-352.0501798588409" z="0.0" x="1098.5215985342093"/>
  </node>
  <node id="150785" label="HDAC1" cy:nodeId="107303">
    <graphics y="-547.7891019779815" z="0.0" x="1328.0736004873343"/>
  </node>
  <node id="150884" label="CHD2" cy:nodeId="105770">
    <graphics y="340.97127399858095" z="0.0" x="-650.244087500947"/>
  </node>
  <node id="150720" label="GNPDA1" cy:nodeId="107305">
    <graphics y="-705.359780688919" z="0.0" x="896.4622723623343"/>
  </node>
  <node id="150886" label="CHD1" cy:nodeId="105769">
    <graphics y="291.6444002192841" z="0.0" x="-485.7797625497751"/>
  </node>
  <node id="150883" label="NDST2" cy:nodeId="105772">
    <graphics y="-57.58917369429014" z="0.0" x="-689.9849932626657"/>
  </node>
  <node id="150800" label="EXT2" cy:nodeId="107307">
    <graphics y="-839.2396024662628" z="0.0" x="1632.1335370107718"/>
  </node>
  <node id="150917" label="OGT" cy:nodeId="105771">
    <graphics y="284.6248994868622" z="0.0" x="-639.9720538095407"/>
  </node>
  <node id="150876" label="CHD8" cy:nodeId="105774">
    <graphics y="456.5189424556122" z="0.0" x="-438.80408505954074"/>
  </node>
  <node id="150934" label="NAAA" cy:nodeId="107310">
    <graphics y="-641.0463346439972" z="0.0" x="-932.904487891572"/>
  </node>
  <node id="150847" label="GBA" cy:nodeId="107309">
    <graphics y="-903.145913501419" z="0.0" x="-641.8407061532907"/>
  </node>
  <node id="150877" label="CHD4" cy:nodeId="105773">
    <graphics y="822.530111889206" z="0.0" x="40.8835217519827"/>
  </node>
  <node id="150937" label="LAMP3" cy:nodeId="105776">
    <graphics y="-878.1401151615753" z="0.0" x="-1020.6026690439157"/>
  </node>
  <node id="150753" label="JARID2" cy:nodeId="107311">
    <graphics y="-369.3478330570831" z="0.0" x="1413.1818768545218"/>
  </node>
  <node id="150873" label="CIITA" cy:nodeId="105775">
    <graphics y="-999.7433866459503" z="0.0" x="-1003.502144141572"/>
  </node>
  <node id="150775" label="GAL3ST4" cy:nodeId="105778">
    <graphics y="1374.1579805415497" z="0.0" x="-924.9702609018259"/>
  </node>
  <node id="150952" label="MAN2B1" cy:nodeId="105777">
    <graphics y="-911.891030688919" z="0.0" x="-727.295357032197"/>
  </node>
  <node id="150745" label="KLF11" cy:nodeId="107316">
    <graphics y="678.3227754634247" z="0.0" x="-557.9653094247751"/>
  </node>
  <node id="150734" label="B4GALT7" cy:nodeId="105782">
    <graphics y="-1340.1332792240753" z="0.0" x="517.4571454092093"/>
  </node>
  <node id="150743" label="KLF4" cy:nodeId="107317">
    <graphics y="953.9497285884247" z="0.0" x="-338.463081641572"/>
  </node>
  <node id="150740" label="LDB1" cy:nodeId="107320">
    <graphics y="728.9203706782685" z="0.0" x="-939.0184405282907"/>
  </node>
  <node id="150779" label="B4GALNT4" cy:nodeId="105784">
    <graphics y="131.24739704545595" z="0.0" x="1933.7336346670218"/>
  </node>
  <node id="150872" label="CREB1" cy:nodeId="105785">
    <graphics y="797.8390718501435" z="0.0" x="-1014.8753741220407"/>
  </node>
  <node id="150735" label="MBD3" cy:nodeId="107323">
    <graphics y="-1487.7136014897003" z="0.0" x="505.509574608428"/>
  </node>
  <node id="150758" label="GMPPA" cy:nodeId="105787">
    <graphics y="-1299.5147489506378" z="0.0" x="-307.88004331149386"/>
  </node>
  <node id="150871" label="CREBBP" cy:nodeId="105790">
    <graphics y="511.4632783931122" z="0.0" x="-403.30847959079074"/>
  </node>
  <node id="150623" label="POFUT1" cy:nodeId="105792">
    <graphics y="929.6718965571747" z="0.0" x="-79.89860133685397"/>
  </node>
  <node id="150942" label="POFUT2" cy:nodeId="107327">
    <graphics y="1383.4555574458466" z="0.0" x="-1224.5370867685251"/>
  </node>
  <node id="150726" label="NFYA" cy:nodeId="107329">
    <graphics y="537.7887178462372" z="0.0" x="-687.5915606454782"/>
  </node>
  <node id="150710" label="PHF8" cy:nodeId="107334">
    <graphics y="587.0373750727997" z="0.0" x="-472.70133237399386"/>
  </node>
  <node id="150864" label="SLC35B1" cy:nodeId="105798">
    <graphics y="-421.10563029829405" z="0.0" x="1222.7759930654593"/>
  </node>
  <node id="150707" label="PML" cy:nodeId="107336">
    <graphics y="-1027.086343188919" z="0.0" x="-923.8747637704782"/>
  </node>
  <node id="150957" label="SLC35A2" cy:nodeId="107335">
    <graphics y="557.200766186081" z="0.0" x="-749.787300391572"/>
  </node>
  <node id="150985" label="DPM1" cy:nodeId="105799">
    <graphics y="-136.20771731916807" z="0.0" x="1278.1895672842093"/>
  </node>
  <node id="150857" label="E2F6" cy:nodeId="105801">
    <graphics y="280.87776813920595" z="0.0" x="-718.2921221689157"/>
  </node>
  <node id="150854" label="EBF1" cy:nodeId="105804">
    <graphics y="-1083.4604886967315" z="0.0" x="291.51155825100614"/>
  </node>
  <node id="150689" label="SETDB1" cy:nodeId="107339">
    <graphics y="642.0146089595185" z="0.0" x="-810.8604205087595"/>
  </node>
  <node id="150856" label="E2F7" cy:nodeId="105803">
    <graphics y="43.908835033737205" z="0.0" x="1054.2657391592093"/>
  </node>
  <node id="150684" label="SMAD3" cy:nodeId="107342">
    <graphics y="381.72749958451845" z="0.0" x="-795.1034014657907"/>
  </node>
  <node id="150879" label="ST3GAL2" cy:nodeId="105806">
    <graphics y="429.1712862056122" z="0.0" x="-1003.2027667001657"/>
  </node>
  <node id="150853" label="CSGALNACT1" cy:nodeId="105805">
    <graphics y="-1193.8309110600128" z="0.0" x="1014.5319745107718"/>
  </node>
  <node id="150659" label="B3GALT2" cy:nodeId="105808">
    <graphics y="-1152.9272245365753" z="0.0" x="-1149.0780108407907"/>
  </node>
  <node id="150682" label="SMARCA4" cy:nodeId="107343">
    <graphics y="71.42941914018252" z="0.0" x="-192.0933077768259"/>
  </node>
  <node id="150801" label="CHST3" cy:nodeId="105807">
    <graphics y="-1252.1891874272003" z="0.0" x="1394.4765545888968"/>
  </node>
  <node id="150671" label="SP2" cy:nodeId="107346">
    <graphics y="935.3977266352997" z="0.0" x="663.4296795888968"/>
  </node>
  <node id="150920" label="FUT4" cy:nodeId="105810">
    <graphics y="27.51854572709658" z="0.0" x="-816.5192950204782"/>
  </node>
  <node id="150674" label="SOX2" cy:nodeId="107345">
    <graphics y="-550.3240140873565" z="0.0" x="1401.3332440420218"/>
  </node>
  <node id="150845" label="ST3GAL6" cy:nodeId="105811">
    <graphics y="-794.0403226811065" z="0.0" x="1919.2785565420218"/>
  </node>
  <node id="150772" label="B3GNT2" cy:nodeId="106838">
    <graphics y="345.2784334224091" z="0.0" x="123.10828371487332"/>
  </node>
  <node id="150850" label="EGLN2" cy:nodeId="105813">
    <graphics y="802.1262422602997" z="0.0" x="-879.8377764657907"/>
  </node>
  <node id="150976" label="ASCL2" cy:nodeId="106837">
    <graphics y="-1063.7678007084503" z="0.0" x="-561.2334368661814"/>
  </node>
  <node id="150752" label="B4GALNT2" cy:nodeId="107352">
    <graphics y="-245.11813487593076" z="0.0" x="1160.1658856435843"/>
  </node>
  <node id="150814" label="TPST2" cy:nodeId="106840">
    <graphics y="-367.5977567631378" z="0.0" x="1189.7602459951468"/>
  </node>
  <node id="150849" label="EGR2" cy:nodeId="105816">
    <graphics y="-897.5064481693878" z="0.0" x="-833.4897540048532"/>
  </node>
  <node id="150653" label="TAF3" cy:nodeId="107351">
    <graphics y="927.1129365962372" z="0.0" x="33.61613436184598"/>
  </node>
  <node id="150738" label="ST6GALNAC3" cy:nodeId="105815">
    <graphics y="351.88677082475283" z="0.0" x="-980.0211260751657"/>
  </node>
  <node id="150819" label="ST6GALNAC4" cy:nodeId="106839">
    <graphics y="-798.2724393803253" z="0.0" x="-518.5727923349314"/>
  </node>
  <node id="150961" label="SLC35E1" cy:nodeId="106844">
    <graphics y="415.70967731889345" z="0.0" x="-600.6900103525095"/>
  </node>
  <node id="150640" label="TFCP2" cy:nodeId="107355">
    <graphics y="837.9515596431122" z="0.0" x="-229.5394518808298"/>
  </node>
  <node id="150913" label="BRD4" cy:nodeId="106843">
    <graphics y="561.2565523188935" z="0.0" x="-370.2818377450876"/>
  </node>
  <node id="150846" label="EHMT2" cy:nodeId="105821">
    <graphics y="-553.727212329544" z="0.0" x="1859.2266766592093"/>
  </node>
  <node id="150898" label="CDK12" cy:nodeId="106848">
    <graphics y="769.3144136470185" z="0.0" x="232.14562197170926"/>
  </node>
  <node id="150982" label="COG6" cy:nodeId="105824">
    <graphics y="225.04402790483095" z="0.0" x="-549.9715350107126"/>
  </node>
  <node id="150944" label="COG3" cy:nodeId="105823">
    <graphics y="-62.53454722944639" z="0.0" x="527.276664452178"/>
  </node>
  <node id="150869" label="DCP1A" cy:nodeId="106850">
    <graphics y="445.8008028071747" z="0.0" x="1104.2110516592093"/>
  </node>
  <node id="150835" label="ELF2" cy:nodeId="105825">
    <graphics y="-186.3852609593048" z="0.0" x="531.1454388662405"/>
  </node>
  <node id="150832" label="ERCC6" cy:nodeId="105830">
    <graphics y="375.03792438920595" z="0.0" x="-558.3473895029001"/>
  </node>
  <node id="150834" label="EP400" cy:nodeId="105829">
    <graphics y="343.1235567134247" z="0.0" x="-495.82288388766574"/>
  </node>
  <node id="150938" label="FUCA1" cy:nodeId="106856">
    <graphics y="-772.5771268803253" z="0.0" x="-933.5994341806345"/>
  </node>
  <node id="150935" label="ST8SIA4" cy:nodeId="105834">
    <graphics y="-695.7226346928253" z="0.0" x="-766.125923438447"/>
  </node>
  <node id="150936" label="ST3GAL5" cy:nodeId="106857">
    <graphics y="-767.0461820561065" z="0.0" x="-769.164985938447"/>
  </node>
  <node id="150827" label="CHST7" cy:nodeId="105835">
    <graphics y="-431.77262248579405" z="0.0" x="1477.5738446279593"/>
  </node>
  <node id="150836" label="GALNT7" cy:nodeId="106859">
    <graphics y="-213.8655561405792" z="0.0" x="1595.9079510732718"/>
  </node>
  <node id="150812" label="FUS" cy:nodeId="106862">
    <graphics y="-260.05536021772764" z="0.0" x="1260.1857831045218"/>
  </node>
  <node id="150802" label="SULT1C4" cy:nodeId="105837">
    <graphics y="-1224.3154081303253" z="0.0" x="1622.0672528310843"/>
  </node>
  <node id="150950" label="ST8SIA1" cy:nodeId="105840">
    <graphics y="-592.1834501225128" z="0.0" x="-686.2527544931345"/>
  </node>
  <node id="150829" label="ETS1" cy:nodeId="105839">
    <graphics y="-827.843179126419" z="0.0" x="-638.2846758798532"/>
  </node>
  <node id="150663" label="HS3ST3B1" cy:nodeId="105841">
    <graphics y="-653.3503202397003" z="0.0" x="-1201.3702471689157"/>
  </node>
  <node id="150867" label="EXTL2" cy:nodeId="105844">
    <graphics y="572.7654024165497" z="0.0" x="1140.0654217763968"/>
  </node>
  <node id="150923" label="MGAT2" cy:nodeId="106868">
    <graphics y="153.56661091264345" z="0.0" x="-911.6547930673532"/>
  </node>
  <node id="150774" label="HIF1A" cy:nodeId="106867">
    <graphics y="402.46736774858095" z="0.0" x="-269.6309740976267"/>
  </node>
  <node id="150824" label="EZH1" cy:nodeId="105846">
    <graphics y="58.08519611772158" z="0.0" x="-627.3625567392282"/>
  </node>
  <node id="150773" label="GALC" cy:nodeId="106869">
    <graphics y="69.83434162553408" z="0.0" x="-485.5174029306345"/>
  </node>
  <node id="150924" label="SLC35B4" cy:nodeId="105845">
    <graphics y="507.71773395951845" z="0.0" x="-591.728462500947"/>
  </node>
  <node id="150759" label="IRF3" cy:nodeId="106872">
    <graphics y="-1130.4928983647003" z="0.0" x="-376.69312314547824"/>
  </node>
  <node id="150820" label="FLI1" cy:nodeId="105848">
    <graphics y="-745.5969022709503" z="0.0" x="-719.9624102548532"/>
  </node>
  <node id="150822" label="FANCD2" cy:nodeId="105847">
    <graphics y="1477.6095796626435" z="0.0" x="-1611.8809588388376"/>
  </node>
  <node id="150666" label="PGM1" cy:nodeId="116601">
    <graphics y="236.51866779740908" z="0.0" x="1259.7851483388968"/>
  </node>
  <node id="150683" label="PIGH" cy:nodeId="105852">
    <graphics y="436.3785615962372" z="0.0" x="-1178.2248614267282"/>
  </node>
  <node id="150632" label="GAL3ST1" cy:nodeId="116603">
    <graphics y="202.09374103959658" z="0.0" x="-1854.0338213876657"/>
  </node>
  <node id="150881" label="GLCE" cy:nodeId="105851">
    <graphics y="344.38069782670595" z="0.0" x="-898.5013506845407"/>
  </node>
  <node id="150744" label="SLC35D2" cy:nodeId="116605">
    <graphics y="1117.0274873774872" z="0.0" x="-630.368110938447"/>
  </node>
  <node id="150815" label="FOXM1" cy:nodeId="105853">
    <graphics y="-155.44509162489317" z="0.0" x="1196.2491375967093"/>
  </node>
  <node id="150702" label="POU2F2" cy:nodeId="106880">
    <graphics y="-348.64388408247373" z="0.0" x="-1473.8271563486032"/>
  </node>
  <node id="150783" label="GNPNAT1" cy:nodeId="105855">
    <graphics y="-542.185220142044" z="0.0" x="1478.7288739248343"/>
  </node>
  <node id="150784" label="ALG6" cy:nodeId="106879">
    <graphics y="-714.3427518803253" z="0.0" x="1192.8489911123343"/>
  </node>
  <node id="150805" label="GATA4" cy:nodeId="116607">
    <graphics y="42.14981708940127" z="0.0" x="-1153.0323565439157"/>
  </node>
  <node id="150650" label="TBX3" cy:nodeId="116610">
    <graphics y="184.4797578852997" z="0.0" x="1457.1835858388968"/>
  </node>
  <node id="150715" label="GFPT1" cy:nodeId="106882">
    <graphics y="-907.7324613529815" z="0.0" x="1464.0823895498343"/>
  </node>
  <node id="150813" label="FOXP3" cy:nodeId="105858">
    <graphics y="-785.953530688919" z="0.0" x="-887.8093340829782"/>
  </node>
  <node id="150979" label="DSEL" cy:nodeId="105857">
    <graphics y="290.1240144770966" z="0.0" x="1620.5722577138968"/>
  </node>
  <node id="150891" label="NPL" cy:nodeId="105860">
    <graphics y="-812.5626005131378" z="0.0" x="-992.1711504892282"/>
  </node>
  <node id="150647" label="SULF1" cy:nodeId="106883">
    <graphics y="-278.42225780073545" z="0.0" x="1948.0373456045218"/>
  </node>
  <node id="150892" label="HK3" cy:nodeId="105859">
    <graphics y="-730.1362699467315" z="0.0" x="-868.7628252939157"/>
  </node>
  <node id="150803" label="GATA6" cy:nodeId="105862">
    <graphics y="-1045.7280057865753" z="0.0" x="1550.6138836904593"/>
  </node>
  <node id="150686" label="SIRT6" cy:nodeId="106885">
    <graphics y="-1349.0262235600128" z="0.0" x="776.9252240224905"/>
  </node>
  <node id="150811" label="GABPA" cy:nodeId="105861">
    <graphics y="395.94698200639345" z="0.0" x="-482.1063006357126"/>
  </node>
  <node id="150670" label="SPIB" cy:nodeId="106888">
    <graphics y="-1269.2687772709503" z="0.0" x="-962.8753741220407"/>
  </node>
  <node id="150885" label="ALG13" cy:nodeId="105864">
    <graphics y="333.8470369380341" z="0.0" x="-335.2878191904001"/>
  </node>
  <node id="150796" label="GLYR1" cy:nodeId="105866">
    <graphics y="800.4782930415497" z="0.0" x="-90.99213246859836"/>
  </node>
  <node id="150651" label="TBX21" cy:nodeId="106889">
    <graphics y="-1044.4611600834503" z="0.0" x="-731.393013282197"/>
  </node>
  <node id="150798" label="GLI2" cy:nodeId="105865">
    <graphics y="-496.2768644291534" z="0.0" x="1541.5004803701468"/>
  </node>
  <node id="150795" label="ALG1" cy:nodeId="105867">
    <graphics y="1078.4631563227997" z="0.0" x="87.98720522366239"/>
  </node>
  <node id="150959" label="COG8" cy:nodeId="106891">
    <graphics y="545.1366182368622" z="0.0" x="-307.11197690524386"/>
  </node>
  <node id="150620" label="ZBTB10" cy:nodeId="106894">
    <graphics y="561.4748750727997" z="0.0" x="-68.06088571109103"/>
  </node>
  <node id="150823" label="CTBS" cy:nodeId="105869">
    <graphics y="-510.76569499555967" z="0.0" x="-733.2002642587595"/>
  </node>
  <node id="150931" label="STT3A" cy:nodeId="106893">
    <graphics y="-689.7131132084503" z="0.0" x="1610.6551434560843"/>
  </node>
  <node id="150790" label="GTF2I" cy:nodeId="105871">
    <graphics y="690.1562105220185" z="0.0" x="-65.24306039370822"/>
  </node>
  <node id="150897" label="PIGO" cy:nodeId="105874">
    <graphics y="769.0583711665497" z="0.0" x="558.1525799795218"/>
  </node>
  <node id="150787" label="HCFC1" cy:nodeId="105873">
    <graphics y="426.7773653071747" z="0.0" x="-141.46600369967746"/>
  </node>
  <node id="150778" label="HECTD1" cy:nodeId="105875">
    <graphics y="775.8265596431122" z="0.0" x="-412.1745379404001"/>
  </node>
  <node id="150768" label="DPAGT1" cy:nodeId="105878">
    <graphics y="1454.7356477778778" z="0.0" x="-1782.9585345224314"/>
  </node>
  <node id="150769" label="HINFP" cy:nodeId="105877">
    <graphics y="1535.3153902095185" z="0.0" x="-1854.0338213876657"/>
  </node>
  <node id="150762" label="IKZF1" cy:nodeId="105882">
    <graphics y="-646.5327543217315" z="0.0" x="-814.9470293954782"/>
  </node>
  <node id="150933" label="LIPA" cy:nodeId="105884">
    <graphics y="-652.057290454544" z="0.0" x="-993.797066016572"/>
  </node>
  <node id="150975" label="GM2A" cy:nodeId="105883">
    <graphics y="-826.2604764897003" z="0.0" x="-842.771187110322"/>
  </node>
  <node id="150761" label="INO80" cy:nodeId="105885">
    <graphics y="947.7304903071747" z="0.0" x="-1023.8428423837595"/>
  </node>
  <node id="150757" label="IRF4" cy:nodeId="105888">
    <graphics y="-695.7972196537628" z="0.0" x="-825.9932940439157"/>
  </node>
  <node id="150760" label="IRF1" cy:nodeId="105887">
    <graphics y="-720.626626392044" z="0.0" x="-937.4043658212595"/>
  </node>
  <node id="150754" label="IRF8" cy:nodeId="105890">
    <graphics y="-579.948403735794" z="0.0" x="-866.690620704072"/>
  </node>
  <node id="150756" label="IRF5" cy:nodeId="105889">
    <graphics y="-932.942788501419" z="0.0" x="-789.558540625947"/>
  </node>
  <node id="150750" label="JMJD1C" cy:nodeId="105892">
    <graphics y="646.0967012446747" z="0.0" x="-170.0425036386423"/>
  </node>
  <node id="150771" label="MGAT5" cy:nodeId="105893">
    <graphics y="747.174887279831" z="0.0" x="-556.7721331552439"/>
  </node>
  <node id="150748" label="KDM5A" cy:nodeId="105904">
    <graphics y="488.2691865962372" z="0.0" x="-45.727667136567106"/>
  </node>
  <node id="150749" label="KDM3A" cy:nodeId="105903">
    <graphics y="111.03594074662783" z="0.0" x="-324.0895770029001"/>
  </node>
  <node id="150770" label="HS2ST1" cy:nodeId="105906">
    <graphics y="228.7447725337372" z="0.0" x="-198.49566678561496"/>
  </node>
  <node id="150888" label="GNS" cy:nodeId="105905">
    <graphics y="-498.4753202397003" z="0.0" x="-909.3404009775095"/>
  </node>
  <node id="150958" label="B3GALNT2" cy:nodeId="105908">
    <graphics y="350.7109590571747" z="0.0" x="-433.1119158700876"/>
  </node>
  <node id="150747" label="KDM5B" cy:nodeId="105907">
    <graphics y="644.458822826706" z="0.0" x="-276.0310748056345"/>
  </node>
  <node id="150739" label="LMO2" cy:nodeId="105909">
    <graphics y="237.45320759233095" z="0.0" x="-918.2205279306345"/>
  </node>
  <node id="150794" label="GMEB1" cy:nodeId="120757">
    <graphics y="267.97164020951845" z="0.0" x="887.1183392568655"/>
  </node>
  <node id="150736" label="LYL1" cy:nodeId="105911">
    <graphics y="-820.162026782669" z="0.0" x="-714.8533404306345"/>
  </node>
  <node id="150902" label="ST6GALNAC1" cy:nodeId="105920">
    <graphics y="185.48351154740908" z="0.0" x="-1346.1069415048532"/>
  </node>
  <node id="150664" label="IDS" cy:nodeId="105922">
    <graphics y="-546.4893583256378" z="0.0" x="-1157.8277667001657"/>
  </node>
  <node id="150981" label="ARID3A" cy:nodeId="107970">
    <graphics y="91.4543672602997" z="0.0" x="1557.1544110342093"/>
  </node>
  <node id="150733" label="MECP2" cy:nodeId="105921">
    <graphics y="135.06035480912783" z="0.0" x="-723.4111407236032"/>
  </node>
  <node id="150732" label="MED1" cy:nodeId="105924">
    <graphics y="875.7818819087372" z="0.0" x="423.08190126858426"/>
  </node>
  <node id="150637" label="NEU1" cy:nodeId="107971">
    <graphics y="-609.2121061283722" z="0.0" x="2943.5358807607718"/>
  </node>
  <node id="150816" label="NDST1" cy:nodeId="105923">
    <graphics y="300.0329500239716" z="0.0" x="35.47929354153348"/>
  </node>
  <node id="150943" label="AUTS2" cy:nodeId="107973">
    <graphics y="1374.1579805415497" z="0.0" x="-1324.1039126352243"/>
  </node>
  <node id="150878" label="FUT8" cy:nodeId="107976">
    <graphics y="621.7800508540497" z="0.0" x="-668.4905474618845"/>
  </node>
  <node id="150840" label="SLC35F1" cy:nodeId="105927">
    <graphics y="-642.465005298294" z="0.0" x="1969.3978192373343"/>
  </node>
  <node id="150861" label="DLX4" cy:nodeId="123850">
    <graphics y="1383.4555574458466" z="0.0" x="-1024.970260901826"/>
  </node>
  <node id="150903" label="CBX2" cy:nodeId="123849">
    <graphics y="345.1235261958466" z="0.0" x="-1268.6430743173532"/>
  </node>
  <node id="150722" label="NKX2-5" cy:nodeId="123852">
    <graphics y="-559.9730924564972" z="0.0" x="1154.1524579092093"/>
  </node>
  <node id="150730" label="MRE11A" cy:nodeId="105931">
    <graphics y="1374.1579805415497" z="0.0" x="-1711.8809588388376"/>
  </node>
  <node id="150818" label="FOXH1" cy:nodeId="123851">
    <graphics y="-340.7878507572784" z="0.0" x="1320.4094159170218"/>
  </node>
  <node id="150697" label="PRDM14" cy:nodeId="123854">
    <graphics y="-246.16830577436826" z="0.0" x="1071.2274090810843"/>
  </node>
  <node id="150729" label="MYBL1" cy:nodeId="105934">
    <graphics y="715.836752514206" z="0.0" x="-1143.1239092782907"/>
  </node>
  <node id="150708" label="PITX1" cy:nodeId="123853">
    <graphics y="-704.7361844975128" z="0.0" x="2701.9938885732718"/>
  </node>
  <node id="150974" label="CTSA" cy:nodeId="107984">
    <graphics y="-1032.1747831303253" z="0.0" x="-851.0931475595407"/>
  </node>
  <node id="150633" label="TOX4" cy:nodeId="123855">
    <graphics y="198.46764240678408" z="0.0" x="-1682.7473223642282"/>
  </node>
  <node id="150862" label="DICER1" cy:nodeId="107985">
    <graphics y="265.8188692134247" z="0.0" x="-992.997749610322"/>
  </node>
  <node id="150841" label="CHST9" cy:nodeId="105939">
    <graphics y="-433.42035808149717" z="0.0" x="2099.2514569326468"/>
  </node>
  <node id="150830" label="B4GALNT1" cy:nodeId="107990">
    <graphics y="554.3747163813935" z="0.0" x="-855.1070025400095"/>
  </node>
  <node id="150826" label="HAS3" cy:nodeId="105941">
    <graphics y="-320.5819181400909" z="0.0" x="1628.2398602529593"/>
  </node>
  <node id="150727" label="NFATC1" cy:nodeId="105944">
    <graphics y="-928.6077665287628" z="0.0" x="-886.8755572275095"/>
  </node>
  <node id="150804" label="ALG14" cy:nodeId="107992">
    <graphics y="75.07770405229189" z="0.0" x="-980.0244830087595"/>
  </node>
  <node id="150799" label="GLI1" cy:nodeId="107991">
    <graphics y="-757.723550220169" z="0.0" x="1410.9543377920218"/>
  </node>
  <node id="150725" label="NFYC" cy:nodeId="105946">
    <graphics y="-905.6569608647003" z="0.0" x="1999.9326092763968"/>
  </node>
  <node id="150776" label="HEYL" cy:nodeId="107993">
    <graphics y="1383.4555574458466" z="0.0" x="-825.4034350351267"/>
  </node>
  <node id="150791" label="HS6ST1" cy:nodeId="107996">
    <graphics y="-242.02977885786436" z="0.0" x="1826.0141522451468"/>
  </node>
  <node id="150723" label="NIPBL" cy:nodeId="105947">
    <graphics y="472.0626436274872" z="0.0" x="-708.437691016572"/>
  </node>
  <node id="150765" label="HNF4A" cy:nodeId="107995">
    <graphics y="-193.55983485762022" z="0.0" x="1505.0513836904593"/>
  </node>
  <node id="150868" label="SLC35D1" cy:nodeId="105950">
    <graphics y="654.1330781977997" z="0.0" x="1272.3244549795218"/>
  </node>
  <node id="150717" label="NR2C2" cy:nodeId="105949">
    <graphics y="446.2977510493622" z="0.0" x="-552.2977374032907"/>
  </node>
  <node id="150716" label="NR5A2" cy:nodeId="105952">
    <graphics y="-671.5467313725128" z="0.0" x="1442.6779706045218"/>
  </node>
  <node id="150843" label="GALNT3" cy:nodeId="108000">
    <graphics y="-481.5578702885284" z="0.0" x="1634.9780194326468"/>
  </node>
  <node id="150782" label="NANS" cy:nodeId="108002">
    <graphics y="-798.6379178959503" z="0.0" x="1105.0097577138968"/>
  </node>
  <node id="150909" label="SLC35A1" cy:nodeId="108001">
    <graphics y="226.65227375444033" z="0.0" x="-674.2671587900095"/>
  </node>
  <node id="150781" label="B3GNT7" cy:nodeId="108004">
    <graphics y="-483.3574003178253" z="0.0" x="1201.1834637685843"/>
  </node>
  <node id="150709" label="PIAS1" cy:nodeId="105958">
    <graphics y="411.8484102290497" z="0.0" x="-686.012886329072"/>
  </node>
  <node id="150704" label="POLR3A" cy:nodeId="105960">
    <graphics y="687.9174409907685" z="0.0" x="-409.2015154794626"/>
  </node>
  <node id="150706" label="POLR2B" cy:nodeId="105959">
    <graphics y="843.5645967524872" z="0.0" x="-436.94239072360324"/>
  </node>
  <node id="150806" label="CHPF2" cy:nodeId="108007">
    <graphics y="-798.1659940678253" z="0.0" x="2411.3266522451468"/>
  </node>
  <node id="150698" label="PRDM1" cy:nodeId="105962">
    <graphics y="254.11434040483095" z="0.0" x="-844.6947100595407"/>
  </node>
  <node id="150695" label="PRKDC" cy:nodeId="105963">
    <graphics y="402.6754365962372" z="0.0" x="57.24427004299832"/>
  </node>
  <node id="150699" label="CHST8" cy:nodeId="108011">
    <graphics y="-659.875893970169" z="0.0" x="1082.3713299795218"/>
  </node>
  <node id="150839" label="UGGT2" cy:nodeId="105966">
    <graphics y="-518.5343717533722" z="0.0" x="2008.2060467763968"/>
  </node>
</graph>
