# Supplementary material for: A systems-based framework to computationally describe putative transcription factors and signaling pathways regulating glycan biosynthesis
Source: publisher site journal article supplement (doi:10.3762/bjoc.17.119), 2021-07-22
Supplement: Additional file 2 [file 1860-5397-17-119-S2.cys › CytoscapeSession-2021_03_21-12_01/views/124859-155975-THCA.xgmml]

<?xml version="1.0" encoding="UTF-8" standalone="yes"?>
<graph id="155975" label="THCA" cy:view="1" cy:networkId="124859" cy:visualStyle="default" cy:rendererId="org.cytoscape.ding" cy:documentVersion="3.0" xmlns:dc="http://purl.org/dc/elements/1.1/" xmlns:xlink="http://www.w3.org/1999/xlink" xmlns:rdf="http://www.w3.org/1999/02/22-rdf-syntax-ns#" xmlns:cy="http://www.cytoscape.org" xmlns="http://www.cs.rpi.edu/XGMML">
  <graphics>
    <att name="NETWORK_NODE_SELECTION" value="true" type="string" cy:type="String"/>
    <att name="NETWORK_CENTER_X_LOCATION" value="45.96514892578125" type="string" cy:type="String"/>
    <att name="NETWORK_HEIGHT" value="510.0" type="string" cy:type="String"/>
    <att name="NETWORK_TITLE" value="THCA" type="string" cy:type="String"/>
    <att name="NETWORK_EDGE_SELECTION" value="true" type="string" cy:type="String"/>
    <att name="NETWORK_CENTER_Y_LOCATION" value="218.65594482421875" type="string" cy:type="String"/>
    <att name="NETWORK_WIDTH" value="1312.0" type="string" cy:type="String"/>
    <att name="NETWORK_DEPTH" value="0.0" type="string" cy:type="String"/>
    <att name="NETWORK_SCALE_FACTOR" value="0.15498632406231808" type="string" cy:type="String"/>
    <att name="NETWORK_ANNOTATION_SELECTION" value="false" type="string" cy:type="String"/>
    <att name="NETWORK_CENTER_Z_LOCATION" value="0.0" type="string" cy:type="String"/>
  </graphics>
  <node id="156376" label="GCNT1" cy:nodeId="108552">
    <graphics y="-395.3156750332828" z="0.0" x="-493.9005950882113"/>
  </node>
  <node id="156357" label="UGDH" cy:nodeId="108551">
    <graphics y="-583.2923596035953" z="0.0" x="-309.3884948684847"/>
  </node>
  <node id="156092" label="DDOST" cy:nodeId="108555">
    <graphics y="543.759703384686" z="0.0" x="1094.3039642379606"/>
  </node>
  <node id="156020" label="PIGC" cy:nodeId="108558">
    <graphics y="1397.1892688143735" z="0.0" x="-58.86675109407065"/>
  </node>
  <node id="156304" label="GALE" cy:nodeId="108559">
    <graphics y="928.0737292635922" z="0.0" x="-155.992689509598"/>
  </node>
  <node id="156028" label="GALNT6" cy:nodeId="108561">
    <graphics y="611.1732165682797" z="0.0" x="-1060.362905879227"/>
  </node>
  <node id="156239" label="DR1" cy:nodeId="108571">
    <graphics y="-1139.2604382168765" z="0.0" x="-686.7282012893832"/>
  </node>
  <node id="156233" label="EBNA1BP2" cy:nodeId="108576">
    <graphics y="1813.5563037264828" z="0.0" x="-970.9727310135042"/>
  </node>
  <node id="156310" label="PIGL" cy:nodeId="108578">
    <graphics y="-596.832337630939" z="0.0" x="702.0783783004606"/>
  </node>
  <node id="156207" label="EXT1" cy:nodeId="108580">
    <graphics y="180.21186708097503" z="0.0" x="1321.241098027023"/>
  </node>
  <node id="156014" label="ST3GAL1" cy:nodeId="108579">
    <graphics y="-242.37017942781404" z="0.0" x="980.1757904098356"/>
  </node>
  <node id="156212" label="ETV4" cy:nodeId="108581">
    <graphics y="-303.2597668301578" z="0.0" x="-1339.5768951370394"/>
  </node>
  <node id="156118" label="CHPF" cy:nodeId="108583">
    <graphics y="1332.368101822186" z="0.0" x="563.4834686324918"/>
  </node>
  <node id="156274" label="SLC35A4" cy:nodeId="108586">
    <graphics y="1015.4273059237485" z="0.0" x="899.9745574996793"/>
  </node>
  <node id="156198" label="FOXO3" cy:nodeId="108587">
    <graphics y="-560.3024304043765" z="0.0" x="-398.02333678743"/>
  </node>
  <node id="156097" label="GAL3ST3" cy:nodeId="108590">
    <graphics y="671.3422839510922" z="0.0" x="718.4477020309293"/>
  </node>
  <node id="156175" label="GMEB2" cy:nodeId="108589">
    <graphics y="1110.074156509686" z="0.0" x="712.2566619918668"/>
  </node>
  <node id="156163" label="HBP1" cy:nodeId="108591">
    <graphics y="-1298.6264050137515" z="0.0" x="218.0953460738981"/>
  </node>
  <node id="156125" label="SULT1A3" cy:nodeId="108594">
    <graphics y="551.6406237948422" z="0.0" x="330.7904449508512"/>
  </node>
  <node id="156157" label="HDAC6" cy:nodeId="108593">
    <graphics y="15.643488632488697" z="0.0" x="-130.6677850677645"/>
  </node>
  <node id="156121" label="MAFF" cy:nodeId="108598">
    <graphics y="-42.86280180330232" z="0.0" x="-790.8365386917269"/>
  </node>
  <node id="156129" label="KLF15" cy:nodeId="108597">
    <graphics y="-240.5836193692203" z="0.0" x="1210.1516204879606"/>
  </node>
  <node id="156107" label="MLLT1" cy:nodeId="108601">
    <graphics y="1804.258726822186" z="0.0" x="-1469.673208613602"/>
  </node>
  <node id="156003" label="B3GAT2" cy:nodeId="108606">
    <graphics y="-298.6366284024234" z="0.0" x="-102.48584975740073"/>
  </node>
  <node id="156106" label="GALNT9" cy:nodeId="108605">
    <graphics y="1813.5563037264828" z="0.0" x="-1370.1063827469027"/>
  </node>
  <node id="156070" label="POLR3D" cy:nodeId="108609">
    <graphics y="48.387274490642994" z="0.0" x="-967.2606719925082"/>
  </node>
  <node id="156098" label="CHST5" cy:nodeId="108612">
    <graphics y="962.6049792635922" z="0.0" x="637.7484832809293"/>
  </node>
  <node id="156048" label="SATB1" cy:nodeId="108614">
    <graphics y="-1119.458558334064" z="0.0" x="-273.4871734573519"/>
  </node>
  <node id="156056" label="RING1" cy:nodeId="108613">
    <graphics y="955.772886978436" z="0.0" x="477.9569183395231"/>
  </node>
  <node id="156015" label="TAL1" cy:nodeId="108624">
    <graphics y="-52.215440047931224" z="0.0" x="761.4613739059293"/>
  </node>
  <node id="156000" label="THAP1" cy:nodeId="108626">
    <graphics y="-963.5507214200015" z="0.0" x="548.7787567184293"/>
  </node>
  <node id="155996" label="TRRAP" cy:nodeId="108628">
    <graphics y="-1054.4245007168765" z="0.0" x="-625.588522334305"/>
  </node>
  <node id="156083" label="NR2F6" cy:nodeId="117859">
    <graphics y="1236.5408313143735" z="0.0" x="-198.13713683625815"/>
  </node>
  <node id="156077" label="UXS1" cy:nodeId="109669">
    <graphics y="-252.95611692781404" z="0.0" x="-231.3863204910433"/>
  </node>
  <node id="155978" label="ALG2" cy:nodeId="109671">
    <graphics y="-1245.667054427814" z="0.0" x="874.0965057418668"/>
  </node>
  <node id="156186" label="GATA3" cy:nodeId="109677">
    <graphics y="27.746886001873463" z="0.0" x="-1249.6113189651644"/>
  </node>
  <node id="156153" label="HEY1" cy:nodeId="109679">
    <graphics y="153.4141070712094" z="0.0" x="778.2161346481168"/>
  </node>
  <node id="155997" label="XYLT2" cy:nodeId="109684">
    <graphics y="1462.2420031893735" z="0.0" x="585.2220550582731"/>
  </node>
  <node id="156085" label="NR1H2" cy:nodeId="109685">
    <graphics y="942.6154773104672" z="0.0" x="115.15485535124185"/>
  </node>
  <node id="156318" label="PIGG" cy:nodeId="109689">
    <graphics y="-538.7595226895328" z="0.0" x="58.73104248503091"/>
  </node>
  <node id="156001" label="TGIF1" cy:nodeId="109691">
    <graphics y="-116.8109905850406" z="0.0" x="-1091.5603546096957"/>
  </node>
  <node id="156396" label="AEBP2" cy:nodeId="110787">
    <graphics y="-1327.842347396564" z="0.0" x="-485.095358271805"/>
  </node>
  <node id="156311" label="BTAF1" cy:nodeId="110789">
    <graphics y="-840.2504284512515" z="0.0" x="549.5181976363981"/>
  </node>
  <node id="156243" label="DDIT3" cy:nodeId="110793">
    <graphics y="773.980406509686" z="0.0" x="1108.0717865035856"/>
  </node>
  <node id="156105" label="MNT" cy:nodeId="110801">
    <graphics y="-684.373353255939" z="0.0" x="-672.4153350784457"/>
  </node>
  <node id="156088" label="SGSH" cy:nodeId="110804">
    <graphics y="730.594908462811" z="0.0" x="480.34015808561685"/>
  </node>
  <node id="156398" label="ADNP" cy:nodeId="105684">
    <graphics y="681.183043228436" z="0.0" x="-743.4522003128207"/>
  </node>
  <node id="155986" label="GALK2" cy:nodeId="110806">
    <graphics y="-432.83380247468904" z="0.0" x="1335.698129277023"/>
  </node>
  <node id="156394" label="AFF4" cy:nodeId="105686">
    <graphics y="-741.8033459317203" z="0.0" x="-407.7038787796175"/>
  </node>
  <node id="156397" label="FUT7" cy:nodeId="105685">
    <graphics y="422.38799928312346" z="0.0" x="-638.8771881057894"/>
  </node>
  <node id="156392" label="STT3B" cy:nodeId="105688">
    <graphics y="-734.1309826504703" z="0.0" x="-53.62729491731284"/>
  </node>
  <node id="156393" label="MAN1A2" cy:nodeId="105687">
    <graphics y="-609.7501232754703" z="0.0" x="-201.57885589143393"/>
  </node>
  <node id="156066" label="PSIP1" cy:nodeId="110810">
    <graphics y="-1228.574280990314" z="0.0" x="-102.89336242219565"/>
  </node>
  <node id="156390" label="FUT11" cy:nodeId="105690">
    <graphics y="-759.5856945645328" z="0.0" x="-355.07800902864096"/>
  </node>
  <node id="156068" label="PPARGC1A" cy:nodeId="110809">
    <graphics y="-410.9235851895328" z="0.0" x="608.4818817184293"/>
  </node>
  <node id="156391" label="NEU3" cy:nodeId="105689">
    <graphics y="-757.4205334317203" z="0.0" x="-251.44350280305503"/>
  </node>
  <node id="156320" label="COG5" cy:nodeId="105692">
    <graphics y="-719.6013195645328" z="0.0" x="248.09171448210122"/>
  </node>
  <node id="156389" label="ACER2" cy:nodeId="105691">
    <graphics y="-583.083070052814" z="0.0" x="-458.4233612014925"/>
  </node>
  <node id="155999" label="TOP1" cy:nodeId="110814">
    <graphics y="-356.27850462312654" z="0.0" x="-1010.4272979690707"/>
  </node>
  <node id="156354" label="MAN2A1" cy:nodeId="105694">
    <graphics y="-905.0067761075015" z="0.0" x="-247.9065612747347"/>
  </node>
  <node id="156035" label="SP4" cy:nodeId="110813">
    <graphics y="-1182.2162487637515" z="0.0" x="151.9642425582731"/>
  </node>
  <node id="156353" label="SLC35F5" cy:nodeId="105696">
    <graphics y="-678.939271224689" z="0.0" x="42.01546631315591"/>
  </node>
  <node id="156360" label="SLC35A3" cy:nodeId="105695">
    <graphics y="-789.2789318692203" z="0.0" x="-42.16730346223471"/>
  </node>
  <node id="156215" label="ST8SIA6" cy:nodeId="105698">
    <graphics y="82.403876053143" z="0.0" x="462.7393890426481"/>
  </node>
  <node id="156218" label="GALNT10" cy:nodeId="105697">
    <graphics y="-198.0872357022281" z="0.0" x="711.2112518356168"/>
  </node>
  <node id="156381" label="RTF1" cy:nodeId="105700">
    <graphics y="-963.3187267910953" z="0.0" x="-119.99150477787612"/>
  </node>
  <node id="156382" label="ARID2" cy:nodeId="105699">
    <graphics y="-1156.059876693439" z="0.0" x="-16.05339660188315"/>
  </node>
  <node id="156361" label="SLC35A5" cy:nodeId="105702">
    <graphics y="-637.228089584064" z="0.0" x="-126.10864438554404"/>
  </node>
  <node id="156362" label="ATF1" cy:nodeId="105701">
    <graphics y="-674.1000988614078" z="0.0" x="-353.0519164993441"/>
  </node>
  <node id="156355" label="ATF2" cy:nodeId="105704">
    <graphics y="-764.3865978848453" z="0.0" x="-111.19092788240073"/>
  </node>
  <node id="156359" label="GALNT4" cy:nodeId="105703">
    <graphics y="-373.0798351895328" z="0.0" x="-372.00163878938315"/>
  </node>
  <node id="156294" label="UGGT1" cy:nodeId="105705">
    <graphics y="-900.417054427814" z="0.0" x="28.360070805343412"/>
  </node>
  <node id="156191" label="HAS1" cy:nodeId="105708">
    <graphics y="453.8843982089047" z="0.0" x="-1081.8913482620394"/>
  </node>
  <node id="156335" label="B3GNT5" cy:nodeId="105707">
    <graphics y="172.2034594882016" z="0.0" x="-590.05946959993"/>
  </node>
  <node id="156349" label="ATF7IP" cy:nodeId="105710">
    <graphics y="-1105.0514538418765" z="0.0" x="454.88569031217935"/>
  </node>
  <node id="156347" label="ATRX" cy:nodeId="105712">
    <graphics y="-1018.4389050137515" z="0.0" x="-57.75547637483237"/>
  </node>
  <node id="156348" label="ALG10" cy:nodeId="105711">
    <graphics y="-882.4935925137515" z="0.0" x="113.86156616667154"/>
  </node>
  <node id="156013" label="HS6ST3" cy:nodeId="114930">
    <graphics y="-154.2947094571109" z="0.0" x="1065.5903411910856"/>
  </node>
  <node id="156345" label="BACH1" cy:nodeId="105714">
    <graphics y="-259.4717877041812" z="0.0" x="-606.2326568557894"/>
  </node>
  <node id="156346" label="FKTN" cy:nodeId="105713">
    <graphics y="-577.847962630939" z="0.0" x="-61.811502833572604"/>
  </node>
  <node id="156343" label="MAN1A1" cy:nodeId="105716">
    <graphics y="87.01621125822112" z="0.0" x="-882.1327423050082"/>
  </node>
  <node id="156344" label="CSGALNACT2" cy:nodeId="105715">
    <graphics y="-48.26781774873689" z="0.0" x="-679.1348785354769"/>
  </node>
  <node id="156237" label="CHSY1" cy:nodeId="105717">
    <graphics y="264.8758227694516" z="0.0" x="409.50312195280435"/>
  </node>
  <node id="156192" label="GFPT2" cy:nodeId="105719">
    <graphics y="318.1026599276547" z="0.0" x="-1289.5912994339144"/>
  </node>
  <node id="156171" label="GRHL3" cy:nodeId="114938">
    <graphics y="211.7413012850766" z="0.0" x="-656.9267486526644"/>
  </node>
  <node id="156267" label="DPM3" cy:nodeId="105722">
    <graphics y="990.797545181561" z="0.0" x="346.7041412399137"/>
  </node>
  <node id="156179" label="GLI3" cy:nodeId="114937">
    <graphics y="342.56985353117034" z="0.0" x="1316.2502533004606"/>
  </node>
  <node id="156277" label="MGAT1" cy:nodeId="105724">
    <graphics y="176.18972657804534" z="0.0" x="1054.030160527023"/>
  </node>
  <node id="156340" label="BATF3" cy:nodeId="105723">
    <graphics y="128.2445514071469" z="0.0" x="-1036.4868072464144"/>
  </node>
  <node id="156327" label="BMI1" cy:nodeId="105726">
    <graphics y="-510.55978514070466" z="0.0" x="-89.78092612763999"/>
  </node>
  <node id="156336" label="BCAT1" cy:nodeId="105725">
    <graphics y="319.69610475187346" z="0.0" x="-551.7832244827425"/>
  </node>
  <node id="156326" label="ALG10B" cy:nodeId="105727">
    <graphics y="-787.0698254239078" z="0.0" x="138.45124206999185"/>
  </node>
  <node id="156086" label="NR1D1" cy:nodeId="114946">
    <graphics y="1165.142760025311" z="0.0" x="-361.6726440384066"/>
  </node>
  <node id="156188" label="PIGN" cy:nodeId="105730">
    <graphics y="-646.0634167325015" z="0.0" x="418.0753265426481"/>
  </node>
  <node id="156167" label="SLC35E3" cy:nodeId="105732">
    <graphics y="-953.770570052814" z="0.0" x="191.75486145475747"/>
  </node>
  <node id="156089" label="NKX2-1" cy:nodeId="116995">
    <graphics y="811.4216906893735" z="0.0" x="511.5009857223356"/>
  </node>
  <node id="156395" label="FAM20B" cy:nodeId="105731">
    <graphics y="-958.0479748379703" z="0.0" x="-367.90610351106284"/>
  </node>
  <node id="156117" label="ALG12" cy:nodeId="105734">
    <graphics y="879.0800769198422" z="0.0" x="735.2403656051481"/>
  </node>
  <node id="156309" label="C17orf49" cy:nodeId="105736">
    <graphics y="1182.9443957674985" z="0.0" x="-47.74249114534018"/>
  </node>
  <node id="156303" label="CASP8AP2" cy:nodeId="105738">
    <graphics y="-650.9476330410953" z="0.0" x="90.67708740690591"/>
  </node>
  <node id="156279" label="HYAL2" cy:nodeId="105737">
    <graphics y="743.8465564120297" z="0.0" x="-308.4978851272738"/>
  </node>
  <node id="156299" label="CBFB" cy:nodeId="105739">
    <graphics y="-146.93970610017732" z="0.0" x="-728.9005645706332"/>
  </node>
  <node id="156281" label="RFNG" cy:nodeId="105744">
    <graphics y="1066.284605728436" z="0.0" x="292.6249786422575"/>
  </node>
  <node id="156169" label="ST6GALNAC6" cy:nodeId="105746">
    <graphics y="1128.4883410799985" z="0.0" x="354.9350677535856"/>
  </node>
  <node id="156375" label="MAN2A2" cy:nodeId="105748">
    <graphics y="-412.6046154629703" z="0.0" x="162.05988464811685"/>
  </node>
  <node id="156160" label="ST3GAL3" cy:nodeId="105747">
    <graphics y="713.1831042635922" z="0.0" x="824.9556366012418"/>
  </node>
  <node id="156341" label="MGAT3" cy:nodeId="105750">
    <graphics y="25.467093216228932" z="0.0" x="-848.1927398636019"/>
  </node>
  <node id="156269" label="IDUA" cy:nodeId="105749">
    <graphics y="823.2753894198422" z="0.0" x="282.58017883757"/>
  </node>
  <node id="156293" label="CBX8" cy:nodeId="105752">
    <graphics y="606.0104968417172" z="0.0" x="622.6665130660856"/>
  </node>
  <node id="156236" label="HYAL1" cy:nodeId="105751">
    <graphics y="318.60891603117034" z="0.0" x="710.4657684371793"/>
  </node>
  <node id="156308" label="B3GAT3" cy:nodeId="105754">
    <graphics y="1085.614683853436" z="0.0" x="185.7154632613981"/>
  </node>
  <node id="156268" label="GALK1" cy:nodeId="105753">
    <graphics y="840.0797107089047" z="0.0" x="156.18680725553872"/>
  </node>
  <node id="156019" label="SUZ12" cy:nodeId="118044">
    <graphics y="-1376.2443249356265" z="0.0" x="63.937783818038724"/>
  </node>
  <node id="156286" label="CCDC101" cy:nodeId="105755">
    <graphics y="1372.711363540936" z="0.0" x="82.78823242643716"/>
  </node>
  <node id="156282" label="DPM2" cy:nodeId="105758">
    <graphics y="964.912291275311" z="0.0" x="422.28791199186685"/>
  </node>
  <node id="156283" label="CDK9" cy:nodeId="105757">
    <graphics y="982.1425769198422" z="0.0" x="46.15322266081216"/>
  </node>
  <node id="156229" label="MAN1B1" cy:nodeId="105760">
    <graphics y="1297.905943619061" z="0.0" x="454.2011810348356"/>
  </node>
  <node id="156174" label="PIGQ" cy:nodeId="105759">
    <graphics y="1014.559752212811" z="0.0" x="470.53156433561685"/>
  </node>
  <node id="156149" label="MOGS" cy:nodeId="105762">
    <graphics y="1469.6397082674985" z="0.0" x="140.2358490035856"/>
  </node>
  <node id="156081" label="POMT1" cy:nodeId="105761">
    <graphics y="573.643248306561" z="0.0" x="447.31574402311685"/>
  </node>
  <node id="156278" label="CEBPA" cy:nodeId="105764">
    <graphics y="629.8914172518735" z="0.0" x="828.1051727340543"/>
  </node>
  <node id="156270" label="CHST12" cy:nodeId="105763">
    <graphics y="721.3116443026547" z="0.0" x="278.51911316374185"/>
  </node>
  <node id="156276" label="MFNG" cy:nodeId="105766">
    <graphics y="225.13801454191253" z="0.0" x="624.1300140426481"/>
  </node>
  <node id="155993" label="NAGK" cy:nodeId="105765">
    <graphics y="1093.766295181561" z="0.0" x="-202.93344726106284"/>
  </node>
  <node id="156123" label="A4GALT" cy:nodeId="105768">
    <graphics y="401.8564135897641" z="0.0" x="347.1571441696012"/>
  </node>
  <node id="156271" label="CEBPB" cy:nodeId="105767">
    <graphics y="778.431822525311" z="0.0" x="213.5116058395231"/>
  </node>
  <node id="156264" label="CHD2" cy:nodeId="105770">
    <graphics y="-465.49545408601716" z="0.0" x="-296.759909053055"/>
  </node>
  <node id="156266" label="CHD1" cy:nodeId="105769">
    <graphics y="-487.09515501375154" z="0.0" x="-470.83269347688315"/>
  </node>
  <node id="156302" label="NDST2" cy:nodeId="105772">
    <graphics y="-451.3408215176578" z="0.0" x="-97.1589378311312"/>
  </node>
  <node id="156265" label="OGT" cy:nodeId="105771">
    <graphics y="-203.96165586824372" z="0.0" x="-142.23546638032553"/>
  </node>
  <node id="156263" label="CHD8" cy:nodeId="105774">
    <graphics y="-858.5775768887515" z="0.0" x="-20.537191767898776"/>
  </node>
  <node id="156261" label="CIITA" cy:nodeId="105775">
    <graphics y="304.16277955656096" z="0.0" x="-808.5931304886019"/>
  </node>
  <node id="156259" label="GAL3ST4" cy:nodeId="105778">
    <graphics y="463.51873658781096" z="0.0" x="-938.6685089065707"/>
  </node>
  <node id="156260" label="MAN2B1" cy:nodeId="105777">
    <graphics y="396.25466798429534" z="0.0" x="-972.0753692581332"/>
  </node>
  <node id="156256" label="CPSF3L" cy:nodeId="105780">
    <graphics y="1035.334166275311" z="0.0" x="186.1030365035856"/>
  </node>
  <node id="156337" label="DSE" cy:nodeId="105779">
    <graphics y="170.40395997648284" z="0.0" x="-913.0812896682894"/>
  </node>
  <node id="156290" label="B4GALT7" cy:nodeId="105782">
    <graphics y="910.213804947186" z="0.0" x="405.05976257780435"/>
  </node>
  <node id="156280" label="B3GALT6" cy:nodeId="105781">
    <graphics y="953.331969009686" z="0.0" x="201.9176116988981"/>
  </node>
  <node id="156252" label="CREB3" cy:nodeId="105786">
    <graphics y="1359.5654895174985" z="0.0" x="-200.5377334549105"/>
  </node>
  <node id="155980" label="GMPPA" cy:nodeId="105787">
    <graphics y="1320.1021106112485" z="0.0" x="251.48294983366372"/>
  </node>
  <node id="156250" label="CREBBP" cy:nodeId="105790">
    <graphics y="-926.2338879239078" z="0.0" x="-189.8469146682894"/>
  </node>
  <node id="156262" label="POFUT1" cy:nodeId="105792">
    <graphics y="-782.287415755939" z="0.0" x="350.1242462203825"/>
  </node>
  <node id="156182" label="COG7" cy:nodeId="105791">
    <graphics y="153.5623462069516" z="0.0" x="558.1228118942106"/>
  </node>
  <node id="156247" label="CTNNB1" cy:nodeId="105794">
    <graphics y="-325.45553709382966" z="0.0" x="-503.2696136428988"/>
  </node>
  <node id="156249" label="CTBP1" cy:nodeId="105793">
    <graphics y="1152.3560168612485" z="0.0" x="219.84940491178872"/>
  </node>
  <node id="156240" label="DEK" cy:nodeId="105795">
    <graphics y="-793.1254284512515" z="0.0" x="252.50675354460122"/>
  </node>
  <node id="156292" label="SLC35B1" cy:nodeId="105798">
    <graphics y="555.0975329745297" z="0.0" x="781.6462493942106"/>
  </node>
  <node id="156287" label="ALG3" cy:nodeId="105797">
    <graphics y="828.6292712557797" z="0.0" x="381.8400970504606"/>
  </node>
  <node id="156232" label="DPM1" cy:nodeId="105799">
    <graphics y="1804.258726822186" z="0.0" x="-1070.5395568802035"/>
  </node>
  <node id="156238" label="EBF1" cy:nodeId="105804">
    <graphics y="257.75079225187346" z="0.0" x="772.6156707809293"/>
  </node>
  <node id="156300" label="ST3GAL2" cy:nodeId="105806">
    <graphics y="194.0165698397641" z="0.0" x="716.3350921676481"/>
  </node>
  <node id="156334" label="FUT4" cy:nodeId="105810">
    <graphics y="409.23635743742034" z="0.0" x="-545.7133392288363"/>
  </node>
  <node id="156314" label="TPST1" cy:nodeId="105809">
    <graphics y="-287.5595715176578" z="0.0" x="571.1127410934293"/>
  </node>
  <node id="156246" label="GALNT12" cy:nodeId="105812">
    <graphics y="330.38592408781096" z="0.0" x="-235.78481139680503"/>
  </node>
  <node id="156387" label="AHR" cy:nodeId="106836">
    <graphics y="-53.00303388948396" z="0.0" x="-435.57768859407065"/>
  </node>
  <node id="156219" label="ST3GAL6" cy:nodeId="105811">
    <graphics y="55.508185135174244" z="0.0" x="714.5554290817106"/>
  </node>
  <node id="156325" label="PIGK" cy:nodeId="106835">
    <graphics y="-612.3141491543765" z="0.0" x="137.0140472457731"/>
  </node>
  <node id="156231" label="EGLN2" cy:nodeId="105813">
    <graphics y="1008.8779895174985" z="0.0" x="-135.1524385406649"/>
  </node>
  <node id="156009" label="TPST2" cy:nodeId="106840">
    <graphics y="438.2325427401547" z="0.0" x="1235.536508183273"/>
  </node>
  <node id="156036" label="UGT8" cy:nodeId="106842">
    <graphics y="-794.029847396564" z="0.0" x="658.0388275192106"/>
  </node>
  <node id="156366" label="UAP1" cy:nodeId="105820">
    <graphics y="-186.14970518464997" z="0.0" x="-873.1669830276644"/>
  </node>
  <node id="156388" label="SLC35E1" cy:nodeId="106844">
    <graphics y="-742.1314709317203" z="0.0" x="-303.6243804886019"/>
  </node>
  <node id="156193" label="LFNG" cy:nodeId="106846">
    <graphics y="388.5349109042172" z="0.0" x="-702.9375518753207"/>
  </node>
  <node id="156228" label="ELF1" cy:nodeId="105822">
    <graphics y="-817.4328014981265" z="0.0" x="-484.1902984573519"/>
  </node>
  <node id="156230" label="EHMT2" cy:nodeId="105821">
    <graphics y="1460.8223254549985" z="0.0" x="449.5542083785856"/>
  </node>
  <node id="156301" label="CBFA2T3" cy:nodeId="106845">
    <graphics y="54.082648025799244" z="0.0" x="1068.499154667648"/>
  </node>
  <node id="156380" label="COG6" cy:nodeId="105824">
    <graphics y="-855.946107162189" z="0.0" x="56.15664062956216"/>
  </node>
  <node id="156295" label="CBX6" cy:nodeId="106847">
    <graphics y="-1086.0387585293765" z="0.0" x="199.10395203092935"/>
  </node>
  <node id="156322" label="COG3" cy:nodeId="105823">
    <graphics y="-522.7479260098453" z="0.0" x="226.03458557585122"/>
  </node>
  <node id="156226" label="ELK3" cy:nodeId="105826">
    <graphics y="-1140.304261459064" z="0.0" x="-558.5658782913363"/>
  </node>
  <node id="156245" label="DCP1A" cy:nodeId="106850">
    <graphics y="-935.3061535489078" z="0.0" x="284.3411956832731"/>
  </node>
  <node id="156227" label="ELF2" cy:nodeId="105825">
    <graphics y="-696.526673568439" z="0.0" x="322.7108551071012"/>
  </node>
  <node id="156257" label="CLOCK" cy:nodeId="106849">
    <graphics y="-858.582337630939" z="0.0" x="-631.7969879104769"/>
  </node>
  <node id="156289" label="GALT" cy:nodeId="106851">
    <graphics y="799.8170153964047" z="0.0" x="692.1417327926481"/>
  </node>
  <node id="156224" label="ERCC6" cy:nodeId="105830">
    <graphics y="-644.417054427814" z="0.0" x="-285.6282562210238"/>
  </node>
  <node id="156225" label="EP400" cy:nodeId="105829">
    <graphics y="-577.9467175137515" z="0.0" x="-142.13297309419272"/>
  </node>
  <node id="156221" label="ERG" cy:nodeId="105832">
    <graphics y="55.74181245451018" z="0.0" x="798.2069793746793"/>
  </node>
  <node id="156007" label="ST6GAL1" cy:nodeId="106855">
    <graphics y="419.40923951749846" z="0.0" x="1109.1145111129606"/>
  </node>
  <node id="156222" label="ERF" cy:nodeId="105831">
    <graphics y="895.3830554354672" z="0.0" x="-450.0936187698519"/>
  </node>
  <node id="156338" label="ST8SIA4" cy:nodeId="105834">
    <graphics y="119.22056459074065" z="0.0" x="-953.9628814651644"/>
  </node>
  <node id="156385" label="GCNT4" cy:nodeId="106858">
    <graphics y="-190.37863279695466" z="0.0" x="-367.3613189651644"/>
  </node>
  <node id="156199" label="UST" cy:nodeId="105836">
    <graphics y="-136.6502697598453" z="0.0" x="924.1092620895231"/>
  </node>
  <node id="156324" label="MGAT4A" cy:nodeId="106860">
    <graphics y="-124.3589413296695" z="0.0" x="151.25632629850747"/>
  </node>
  <node id="156367" label="GALNT7" cy:nodeId="106859">
    <graphics y="-131.30430723543122" z="0.0" x="-556.0414337112582"/>
  </node>
  <node id="156372" label="CHST2" cy:nodeId="105838">
    <graphics y="476.2683093417172" z="0.0" x="-456.5314544632113"/>
  </node>
  <node id="156200" label="SULT1C4" cy:nodeId="105837">
    <graphics y="-291.1389172207828" z="0.0" x="717.1179290817106"/>
  </node>
  <node id="156332" label="CHST15" cy:nodeId="106861">
    <graphics y="-158.4905102383609" z="0.0" x="-667.6787628128207"/>
  </node>
  <node id="156195" label="ST8SIA1" cy:nodeId="105840">
    <graphics y="500.3203112948422" z="0.0" x="-1253.339956660477"/>
  </node>
  <node id="156217" label="ETS1" cy:nodeId="105839">
    <graphics y="39.817145096111744" z="0.0" x="345.6711822555387"/>
  </node>
  <node id="156173" label="GRHL1" cy:nodeId="106866">
    <graphics y="-641.459290755939" z="0.0" x="-1469.673208613602"/>
  </node>
  <node id="156216" label="HS3ST3B1" cy:nodeId="105841">
    <graphics y="23.162718521404713" z="0.0" x="554.9914642379606"/>
  </node>
  <node id="156241" label="EXTL2" cy:nodeId="105844">
    <graphics y="-108.1408474575992" z="0.0" x="505.51557312467935"/>
  </node>
  <node id="156151" label="HIF1A" cy:nodeId="106867">
    <graphics y="-216.9680187832828" z="0.0" x="-557.11757506868"/>
  </node>
  <node id="156210" label="EZH1" cy:nodeId="105846">
    <graphics y="-173.18170286531404" z="0.0" x="-12.545133967605807"/>
  </node>
  <node id="156113" label="SLC35B4" cy:nodeId="105845">
    <graphics y="-704.589905990314" z="0.0" x="562.5612884567106"/>
  </node>
  <node id="156315" label="GALC" cy:nodeId="106869">
    <graphics y="-497.49591184968904" z="0.0" x="117.37062988737466"/>
  </node>
  <node id="156145" label="IRF3" cy:nodeId="106872">
    <graphics y="1195.1362902987485" z="0.0" x="65.83623657682779"/>
  </node>
  <node id="156209" label="FLI1" cy:nodeId="105848">
    <graphics y="124.10552857999846" z="0.0" x="641.5643402145231"/>
  </node>
  <node id="156137" label="KDM4A" cy:nodeId="106874">
    <graphics y="-869.1364147793765" z="0.0" x="334.28623352507"/>
  </node>
  <node id="156208" label="FOS" cy:nodeId="105849">
    <graphics y="235.15847657804534" z="0.0" x="1561.6035247848356"/>
  </node>
  <node id="156181" label="PIGH" cy:nodeId="105852">
    <graphics y="438.1108081210141" z="0.0" x="776.6009002731168"/>
  </node>
  <node id="156127" label="LEF1" cy:nodeId="106875">
    <graphics y="288.8294360507016" z="0.0" x="1058.2382904098356"/>
  </node>
  <node id="156365" label="GLCE" cy:nodeId="105851">
    <graphics y="-132.064141524982" z="0.0" x="-287.9925903274691"/>
  </node>
  <node id="156112" label="MEF2B" cy:nodeId="106877">
    <graphics y="647.7513415682797" z="0.0" x="154.46665344694497"/>
  </node>
  <node id="156201" label="FOXO1" cy:nodeId="105856">
    <graphics y="-381.5622570645328" z="0.0" x="473.85798035124185"/>
  </node>
  <node id="156197" label="FOXP3" cy:nodeId="105858">
    <graphics y="254.4785144198422" z="0.0" x="-1018.3436187698519"/>
  </node>
  <node id="156069" label="PPARA" cy:nodeId="106881">
    <graphics y="-1115.474915755939" z="0.0" x="-168.83510055085776"/>
  </node>
  <node id="156065" label="RARA" cy:nodeId="106884">
    <graphics y="741.779967056561" z="0.0" x="-446.8682464553988"/>
  </node>
  <node id="156190" label="SULF1" cy:nodeId="106883">
    <graphics y="242.16168092374846" z="0.0" x="-1371.643667597977"/>
  </node>
  <node id="156339" label="HK3" cy:nodeId="105859">
    <graphics y="230.54334901456878" z="0.0" x="-953.5762237503207"/>
  </node>
  <node id="156044" label="SMAD2" cy:nodeId="106886">
    <graphics y="-1057.3551647793765" z="0.0" x="48.15010986784341"/>
  </node>
  <node id="156046" label="SIRT6" cy:nodeId="106885">
    <graphics y="998.2491443026547" z="0.0" x="127.77004394987466"/>
  </node>
  <node id="156189" label="GABPA" cy:nodeId="105861">
    <graphics y="-572.052796615314" z="0.0" x="183.7866302535856"/>
  </node>
  <node id="156184" label="ALG13" cy:nodeId="105864">
    <graphics y="-343.90448118562654" z="0.0" x="810.3989349410856"/>
  </node>
  <node id="156185" label="GATAD1" cy:nodeId="105863">
    <graphics y="-192.8725903164859" z="0.0" x="525.0804534957731"/>
  </node>
  <node id="156177" label="GLYR1" cy:nodeId="105866">
    <graphics y="-669.367249740314" z="0.0" x="222.2562347457731"/>
  </node>
  <node id="156254" label="COG4" cy:nodeId="106892">
    <graphics y="1283.334654556561" z="0.0" x="367.1326995895231"/>
  </node>
  <node id="156313" label="ALG1" cy:nodeId="105867">
    <graphics y="380.3066394198422" z="0.0" x="544.7766815231168"/>
  </node>
  <node id="155982" label="ZBTB10" cy:nodeId="106894">
    <graphics y="-1291.7999889981265" z="0.0" x="324.9813324020231"/>
  </node>
  <node id="156170" label="GTF2F1" cy:nodeId="105870">
    <graphics y="1202.7920520174985" z="0.0" x="332.5997711227262"/>
  </node>
  <node id="156298" label="CTBS" cy:nodeId="105869">
    <graphics y="-290.4594738614078" z="0.0" x="-372.34131469270346"/>
  </node>
  <node id="156319" label="STT3A" cy:nodeId="106893">
    <graphics y="-529.7703869473453" z="0.0" x="482.6704193160856"/>
  </node>
  <node id="156168" label="GTF2I" cy:nodeId="105871">
    <graphics y="-800.5036022793765" z="0.0" x="45.039956669601224"/>
  </node>
  <node id="156350" label="PIGO" cy:nodeId="105874">
    <graphics y="-687.4389050137515" z="0.0" x="148.8772064254606"/>
  </node>
  <node id="156155" label="HES4" cy:nodeId="105876">
    <graphics y="886.018492447186" z="0.0" x="-68.92076339265464"/>
  </node>
  <node id="156156" label="HECTD1" cy:nodeId="105875">
    <graphics y="-1031.216859115314" z="0.0" x="-481.44927062532065"/>
  </node>
  <node id="156091" label="DPAGT1" cy:nodeId="105878">
    <graphics y="576.5607898104672" z="0.0" x="1185.6108490035856"/>
  </node>
  <node id="156150" label="HINFP" cy:nodeId="105877">
    <graphics y="1681.956724869061" z="0.0" x="44.82233581999185"/>
  </node>
  <node id="156307" label="TSTA3" cy:nodeId="105880">
    <graphics y="1012.8113391268735" z="0.0" x="-10.70908965608237"/>
  </node>
  <node id="156147" label="HSF1" cy:nodeId="105879">
    <graphics y="1023.671812759686" z="0.0" x="256.9030853317106"/>
  </node>
  <node id="156253" label="GPAA1" cy:nodeId="105881">
    <graphics y="1032.3865344393735" z="0.0" x="544.4249969528043"/>
  </node>
  <node id="156196" label="LIPA" cy:nodeId="105884">
    <graphics y="127.68292115812346" z="0.0" x="-1166.8876861526644"/>
  </node>
  <node id="156032" label="GM2A" cy:nodeId="105883">
    <graphics y="-91.05219389314607" z="0.0" x="-1229.8459381057894"/>
  </node>
  <node id="156146" label="INO80" cy:nodeId="105885">
    <graphics y="-1236.912904037189" z="0.0" x="59.38265381315591"/>
  </node>
  <node id="156144" label="IRF5" cy:nodeId="105889">
    <graphics y="215.0033862460141" z="0.0" x="-860.8003448440707"/>
  </node>
  <node id="156142" label="JMJD1C" cy:nodeId="105892">
    <graphics y="-829.8873303067203" z="0.0" x="-318.86047973176596"/>
  </node>
  <node id="156166" label="MGAT5" cy:nodeId="105893">
    <graphics y="-916.0001232754703" z="0.0" x="-61.592089076248385"/>
  </node>
  <node id="156194" label="GBGT1" cy:nodeId="105897">
    <graphics y="416.04986451749846" z="0.0" x="-1352.975210566727"/>
  </node>
  <node id="156140" label="KAT5" cy:nodeId="105900">
    <graphics y="586.339537369061" z="0.0" x="699.3657318160856"/>
  </node>
  <node id="156342" label="GNB1" cy:nodeId="105902">
    <graphics y="-244.97670103425935" z="0.0" x="-742.6655792190707"/>
  </node>
  <node id="156134" label="KDM5A" cy:nodeId="105904">
    <graphics y="-868.4117443692203" z="0.0" x="-82.40255965730307"/>
  </node>
  <node id="156138" label="KDM3A" cy:nodeId="105903">
    <graphics y="-293.97213865632966" z="0.0" x="23.907678227218412"/>
  </node>
  <node id="156223" label="HS2ST1" cy:nodeId="105906">
    <graphics y="-728.247864974689" z="0.0" x="-537.6599334671175"/>
  </node>
  <node id="156165" label="GNS" cy:nodeId="105905">
    <graphics y="-954.3585217129703" z="0.0" x="4.528359989913724"/>
  </node>
  <node id="156317" label="B3GALNT2" cy:nodeId="105908">
    <graphics y="-324.07208372468904" z="0.0" x="423.96930847624185"/>
  </node>
  <node id="156071" label="HS3ST1" cy:nodeId="105910">
    <graphics y="735.2024524081235" z="0.0" x="-984.2139800979769"/>
  </node>
  <node id="156126" label="LMO2" cy:nodeId="105909">
    <graphics y="424.7034594882016" z="0.0" x="610.2785125778043"/>
  </node>
  <node id="156284" label="RENBP" cy:nodeId="105912">
    <graphics y="-616.3735363614078" z="0.0" x="-1050.2465118362582"/>
  </node>
  <node id="156124" label="LYL1" cy:nodeId="105911">
    <graphics y="502.5156237948422" z="0.0" x="265.24347839811685"/>
  </node>
  <node id="156122" label="MAFB" cy:nodeId="105914">
    <graphics y="-395.8166515957828" z="0.0" x="947.1939788863981"/>
  </node>
  <node id="156364" label="MGAT4B" cy:nodeId="105918">
    <graphics y="-85.18360258455232" z="0.0" x="-829.0195220901644"/>
  </node>
  <node id="156213" label="ST6GALNAC1" cy:nodeId="105920">
    <graphics y="216.88316224699065" z="0.0" x="954.4134613082731"/>
  </node>
  <node id="156120" label="IDS" cy:nodeId="105922">
    <graphics y="-331.2480480801578" z="0.0" x="-773.8819488479769"/>
  </node>
  <node id="156116" label="MECP2" cy:nodeId="105921">
    <graphics y="-630.9987805020328" z="0.0" x="-70.40437926789878"/>
  </node>
  <node id="156377" label="NDST1" cy:nodeId="105923">
    <graphics y="-717.9191296231265" z="0.0" x="-149.06190528413413"/>
  </node>
  <node id="156111" label="MEF2C" cy:nodeId="105926">
    <graphics y="10.5019976962094" z="0.0" x="892.1908050582731"/>
  </node>
  <node id="156159" label="GALNT11" cy:nodeId="107974">
    <graphics y="876.712095962811" z="0.0" x="967.8762298629606"/>
  </node>
  <node id="156114" label="MEF2A" cy:nodeId="105925">
    <graphics y="-591.9486706387515" z="0.0" x="235.76545105436685"/>
  </node>
  <node id="156370" label="FUT8" cy:nodeId="107976">
    <graphics y="4.369658218670338" z="0.0" x="-506.57536925813315"/>
  </node>
  <node id="155990" label="CHST6" cy:nodeId="105930">
    <graphics y="1813.5563037264828" z="0.0" x="-1170.5395568802035"/>
  </node>
  <node id="156305" label="C17orf96" cy:nodeId="107978">
    <graphics y="1044.4519641268735" z="0.0" x="-359.94133605500815"/>
  </node>
  <node id="156108" label="MITF" cy:nodeId="105929">
    <graphics y="-365.39718748445466" z="0.0" x="-260.69646300813315"/>
  </node>
  <node id="156104" label="MSX1" cy:nodeId="105932">
    <graphics y="299.84222291593596" z="0.0" x="566.3538909957731"/>
  </node>
  <node id="156297" label="SLC35F2" cy:nodeId="107979">
    <graphics y="-227.69120909089997" z="0.0" x="-1056.124624629227"/>
  </node>
  <node id="156273" label="RPN1" cy:nodeId="105936">
    <graphics y="788.1153552401547" z="0.0" x="874.2248626754606"/>
  </node>
  <node id="156329" label="CTSA" cy:nodeId="107984">
    <graphics y="220.83811830167815" z="0.0" x="-1093.9519561721957"/>
  </node>
  <node id="156064" label="B3GNT8" cy:nodeId="107983">
    <graphics y="921.581724869061" z="0.0" x="-609.9535736038363"/>
  </node>
  <node id="156255" label="SLC35C2" cy:nodeId="107986">
    <graphics y="900.4412829745297" z="0.0" x="234.96784363249185"/>
  </node>
  <node id="156102" label="MYH11" cy:nodeId="105937">
    <graphics y="99.53762696867034" z="0.0" x="1204.3701263473356"/>
  </node>
  <node id="156101" label="MZF1" cy:nodeId="105942">
    <graphics y="880.8909289706235" z="0.0" x="568.7739349410856"/>
  </node>
  <node id="156235" label="B4GALNT1" cy:nodeId="107990">
    <graphics y="222.5025622714047" z="0.0" x="864.0869842574918"/>
  </node>
  <node id="156296" label="ST6GALNAC5" cy:nodeId="107989">
    <graphics y="11.273565994549244" z="0.0" x="-1064.5226959182894"/>
  </node>
  <node id="156272" label="ALG14" cy:nodeId="107992">
    <graphics y="927.059752212811" z="0.0" x="834.3970428512418"/>
  </node>
  <node id="156100" label="NFAT5" cy:nodeId="105943">
    <graphics y="-689.7470104825015" z="0.0" x="-817.4977325393832"/>
  </node>
  <node id="156093" label="NFYC" cy:nodeId="105946">
    <graphics y="678.5352771151547" z="0.0" x="1086.5488372848356"/>
  </node>
  <node id="156096" label="NFIC" cy:nodeId="105945">
    <graphics y="-821.654603255939" z="0.0" x="-78.79606093904135"/>
  </node>
  <node id="156152" label="HEYL" cy:nodeId="107993">
    <graphics y="214.95457337980315" z="0.0" x="1184.3244720504606"/>
  </node>
  <node id="156087" label="NPAT" cy:nodeId="105948">
    <graphics y="-917.5892956387515" z="0.0" x="-805.8556426956332"/>
  </node>
  <node id="156090" label="NIPBL" cy:nodeId="105947">
    <graphics y="-896.8156750332828" z="0.0" x="-319.2134918167269"/>
  </node>
  <node id="156244" label="SLC35D1" cy:nodeId="105950">
    <graphics y="-735.7725842129703" z="0.0" x="189.35825500944497"/>
  </node>
  <node id="156084" label="NR2C2" cy:nodeId="105949">
    <graphics y="-618.5274670254703" z="0.0" x="-8.181372065750338"/>
  </node>
  <node id="156136" label="KDM4C" cy:nodeId="107997">
    <graphics y="-432.0134594571109" z="0.0" x="87.65891418913247"/>
  </node>
  <node id="156172" label="GALNT3" cy:nodeId="108000">
    <graphics y="-560.0260021817203" z="0.0" x="-1279.612173457352"/>
  </node>
  <node id="156383" label="B3GNT6" cy:nodeId="107999">
    <graphics y="71.6822955477719" z="0.0" x="-634.5764678909457"/>
  </node>
  <node id="156094" label="PIGM" cy:nodeId="105954">
    <graphics y="-1363.1222546231265" z="0.0" x="-323.26262511750815"/>
  </node>
  <node id="156078" label="PBX1" cy:nodeId="105953">
    <graphics y="-485.54513670320466" z="0.0" x="-212.96591796418784"/>
  </node>
  <node id="156076" label="PCGF1" cy:nodeId="105955">
    <graphics y="1243.555357681561" z="0.0" x="129.7226654098356"/>
  </node>
  <node id="156073" label="PIAS1" cy:nodeId="105958">
    <graphics y="-687.3536389004703" z="0.0" x="-31.491651911941744"/>
  </node>
  <node id="156075" label="PHF6" cy:nodeId="105957">
    <graphics y="-1292.4437878262515" z="0.0" x="-598.7881988479769"/>
  </node>
  <node id="156363" label="SLC17A5" cy:nodeId="108005">
    <graphics y="-439.47149778718904" z="0.0" x="-408.21034850618"/>
  </node>
  <node id="156023" label="DAD1" cy:nodeId="108008">
    <graphics y="1456.570250259686" z="0.0" x="809.8013397262418"/>
  </node>
  <node id="156204" label="CHPF2" cy:nodeId="108007">
    <graphics y="530.1835925448422" z="0.0" x="-601.8699249221957"/>
  </node>
  <node id="156234" label="MGAT5B" cy:nodeId="108014">
    <graphics y="134.69819520597503" z="0.0" x="875.8554779098356"/>
  </node>
  <node id="156356" label="UGGT2" cy:nodeId="105966">
    <graphics y="-667.1253674160953" z="0.0" x="-436.9185394241488"/>
  </node>
  <node id="156062" label="RB1" cy:nodeId="105965">
    <graphics y="-813.745179427814" z="0.0" x="99.01806030729654"/>
  </node>
  <node id="156080" label="CHST10" cy:nodeId="108013">
    <graphics y="226.73223756437346" z="0.0" x="152.28623352506997"/>
  </node>
  <node id="156059" label="RBL2" cy:nodeId="105968">
    <graphics y="-737.3551037442203" z="0.0" x="66.35982666471841"/>
  </node>
  <node id="156060" label="RBBP5" cy:nodeId="105967">
    <graphics y="-781.0863049160953" z="0.0" x="-174.28789367219565"/>
  </node>
  <node id="156369" label="B4GALNT3" cy:nodeId="108015">
    <graphics y="-188.57920957918122" z="0.0" x="-803.2657379104769"/>
  </node>
  <node id="156058" label="REST" cy:nodeId="105970">
    <graphics y="-963.6637585293765" z="0.0" x="-587.72353209993"/>
  </node>
  <node id="156291" label="CHST14" cy:nodeId="108018">
    <graphics y="291.5450122225766" z="0.0" x="954.9238372848356"/>
  </node>
  <node id="156057" label="RFX7" cy:nodeId="105974">
    <graphics y="-1214.690736068439" z="0.0" x="-346.83579101106284"/>
  </node>
  <node id="156285" label="CD59" cy:nodeId="111094">
    <graphics y="-471.08590818757966" z="0.0" x="-801.7540191604769"/>
  </node>
  <node id="156061" label="COG2" cy:nodeId="105973">
    <graphics y="-1155.909730209064" z="0.0" x="306.63202820280435"/>
  </node>
  <node id="156067" label="PRDM4" cy:nodeId="108021">
    <graphics y="-911.0141003262515" z="0.0" x="-458.5430511428988"/>
  </node>
  <node id="156248" label="CTBP2" cy:nodeId="111096">
    <graphics y="-1042.829163802814" z="0.0" x="332.06086121061685"/>
  </node>
  <node id="156316" label="FPGT" cy:nodeId="105976">
    <graphics y="-492.6779797207828" z="0.0" x="318.84247742155435"/>
  </node>
  <node id="156180" label="POMT2" cy:nodeId="108023">
    <graphics y="-437.2094738614078" z="0.0" x="711.2696624801481"/>
  </node>
  <node id="156251" label="CREB3L2" cy:nodeId="111095">
    <graphics y="-1041.1468517910953" z="0.0" x="-762.5482696487582"/>
  </node>
  <node id="156053" label="RUNX1" cy:nodeId="105978">
    <graphics y="85.83080934171721" z="0.0" x="-725.3257965042269"/>
  </node>
  <node id="156214" label="ETS2" cy:nodeId="111098">
    <graphics y="392.61025880460784" z="0.0" x="946.9880462692106"/>
  </node>
  <node id="156275" label="GLA" cy:nodeId="108026">
    <graphics y="536.917662369061" z="0.0" x="551.1591888473356"/>
  </node>
  <node id="156054" label="RORA" cy:nodeId="105977">
    <graphics y="-243.16789366121247" z="0.0" x="314.821633915695"/>
  </node>
  <node id="156187" label="GATA2" cy:nodeId="111100">
    <graphics y="254.2736499178891" z="0.0" x="682.0326019332731"/>
  </node>
  <node id="156131" label="PIGA" cy:nodeId="108027">
    <graphics y="209.32679628019378" z="0.0" x="-252.7343658401644"/>
  </node>
  <node id="156258" label="SULF2" cy:nodeId="105979">
    <graphics y="255.1094653475766" z="0.0" x="-711.4180206253207"/>
  </node>
  <node id="156011" label="TBP" cy:nodeId="108030">
    <graphics y="-330.78656126375154" z="0.0" x="142.10318909147622"/>
  </node>
  <node id="156148" label="HMGN3" cy:nodeId="111102">
    <graphics y="982.9726550448422" z="0.0" x="1029.1372161910856"/>
  </node>
  <node id="156027" label="STAT5B" cy:nodeId="108029">
    <graphics y="-540.6339733731265" z="0.0" x="-12.300634761062838"/>
  </node>
  <node id="156052" label="RUNX2" cy:nodeId="105981">
    <graphics y="311.15383790617034" z="0.0" x="-441.86504210969565"/>
  </node>
  <node id="156047" label="SIN3A" cy:nodeId="105984">
    <graphics y="-818.3792736660953" z="0.0" x="-136.52235450288413"/>
  </node>
  <node id="156288" label="B3GNT9" cy:nodeId="108032">
    <graphics y="419.13223146085784" z="0.0" x="679.9192596481168"/>
  </node>
  <node id="156051" label="RXRA" cy:nodeId="105983">
    <graphics y="1099.679136978436" z="0.0" x="952.3595062301481"/>
  </node>
  <node id="156045" label="SIX5" cy:nodeId="105986">
    <graphics y="856.4634997714047" z="0.0" x="463.24933777311685"/>
  </node>
  <node id="156130" label="KLF10" cy:nodeId="111106">
    <graphics y="-953.000794662189" z="0.0" x="-696.5624908401644"/>
  </node>
  <node id="156386" label="UGCG" cy:nodeId="105985">
    <graphics y="-361.4194653164859" z="0.0" x="-438.0419525100863"/>
  </node>
  <node id="156103" label="MXI1" cy:nodeId="111108">
    <graphics y="530.1008288729672" z="0.0" x="969.8859954879606"/>
  </node>
  <node id="156039" label="SMARCC2" cy:nodeId="105988">
    <graphics y="-19.800885928821117" z="0.0" x="-29.88963164826987"/>
  </node>
  <node id="156042" label="SMAD4" cy:nodeId="105987">
    <graphics y="-737.2766125332828" z="0.0" x="119.44352112272622"/>
  </node>
  <node id="155987" label="GMPPB" cy:nodeId="108038">
    <graphics y="-531.4366161953922" z="0.0" x="1248.9943939254606"/>
  </node>
  <node id="156038" label="SMC3" cy:nodeId="105990">
    <graphics y="-733.3417370450015" z="0.0" x="-206.6156677200472"/>
  </node>
  <node id="155988" label="XBP1" cy:nodeId="108037">
    <graphics y="-367.79477049226716" z="0.0" x="1086.6860443160856"/>
  </node>
  <node id="155979" label="ZBTB2" cy:nodeId="108039">
    <graphics y="-1097.584534896564" z="0.0" x="715.1129241988981"/>
  </node>
  <node id="156012" label="TBL1XR1" cy:nodeId="111114">
    <graphics y="-1019.790345443439" z="0.0" x="124.24857483366372"/>
  </node>
  <node id="156034" label="SRF" cy:nodeId="105996">
    <graphics y="104.74905274992034" z="0.0" x="1537.023812870773"/>
  </node>
  <node id="156351" label="GANAB" cy:nodeId="105998">
    <graphics y="-756.1969006192203" z="0.0" x="5.147538761886381"/>
  </node>
  <node id="156330" label="HPSE" cy:nodeId="106000">
    <graphics y="20.829645859051197" z="0.0" x="-779.9534210159457"/>
  </node>
  <node id="156033" label="STAT1" cy:nodeId="105999">
    <graphics y="-21.429770452928096" z="0.0" x="-856.3820098831332"/>
  </node>
  <node id="156029" label="STAT4" cy:nodeId="106002">
    <graphics y="345.8781421053891" z="0.0" x="-862.0495513870394"/>
  </node>
  <node id="156031" label="STAT2" cy:nodeId="106001">
    <graphics y="138.96162294035003" z="0.0" x="-681.2505401565707"/>
  </node>
  <node id="156021" label="SUMO2" cy:nodeId="106004">
    <graphics y="1110.468443619061" z="0.0" x="62.300271611007474"/>
  </node>
  <node id="156017" label="TAF1" cy:nodeId="106006">
    <graphics y="-998.6527722012515" z="0.0" x="-180.08762969514487"/>
  </node>
  <node id="156183" label="COG1" cy:nodeId="106005">
    <graphics y="-18.418686402987987" z="0.0" x="468.1602874801481"/>
  </node>
  <node id="156006" label="TCF7L2" cy:nodeId="106010">
    <graphics y="158.45603822355315" z="0.0" x="401.0368743942106"/>
  </node>
  <node id="156010" label="TCF7L1" cy:nodeId="106009">
    <graphics y="315.1445300448422" z="0.0" x="884.0283294723356"/>
  </node>
  <node id="156022" label="ALG5" cy:nodeId="106012">
    <graphics y="1466.2158801424985" z="0.0" x="931.0766693160856"/>
  </node>
  <node id="156005" label="TEAD1" cy:nodeId="106013">
    <graphics y="-306.4393322598453" z="0.0" x="-644.3931182815707"/>
  </node>
  <node id="156004" label="TET2" cy:nodeId="106016">
    <graphics y="-523.9072582852359" z="0.0" x="-160.05562819978354"/>
  </node>
  <node id="155998" label="TRIM28" cy:nodeId="106018">
    <graphics y="1149.850523697186" z="0.0" x="453.47919617155435"/>
  </node>
  <node id="155995" label="UBTF" cy:nodeId="106020">
    <graphics y="242.8497302401547" z="0.0" x="508.1131683395231"/>
  </node>
  <node id="155992" label="USF2" cy:nodeId="106022">
    <graphics y="897.4510485995297" z="0.0" x="322.3477874801481"/>
  </node>
  <node id="155994" label="USF1" cy:nodeId="106021">
    <graphics y="899.206236587811" z="0.0" x="28.029153446944974"/>
  </node>
  <node id="155989" label="VEZF1" cy:nodeId="106023">
    <graphics y="-683.0567639004703" z="0.0" x="-90.17913665315268"/>
  </node>
  <node id="155984" label="YAP1" cy:nodeId="106026">
    <graphics y="-548.8087780606265" z="0.0" x="-250.90181579133628"/>
  </node>
  <node id="155985" label="XRN2" cy:nodeId="106025">
    <graphics y="-829.1566784512515" z="0.0" x="-253.2090515091097"/>
  </node>
  <node id="155983" label="YY1" cy:nodeId="106028">
    <graphics y="-420.85064817781404" z="0.0" x="-18.394537348953463"/>
  </node>
  <node id="156384" label="GALNT5" cy:nodeId="106027">
    <graphics y="97.86839173917815" z="0.0" x="-556.94277038118"/>
  </node>
  <node id="156306" label="B3GALT4" cy:nodeId="106030">
    <graphics y="1077.2239367831235" z="0.0" x="-20.401930232254244"/>
  </node>
  <node id="155981" label="ZBTB17" cy:nodeId="106029">
    <graphics y="965.2164294589047" z="0.0" x="293.8351837203825"/>
  </node>
  <node id="155977" label="ZBTB33" cy:nodeId="106031">
    <graphics y="-614.0852062832828" z="0.0" x="-367.0939544632113"/>
  </node>
  <node id="156211" label="ETV7" cy:nodeId="118329">
    <graphics y="384.73809693937346" z="0.0" x="-1178.922964472977"/>
  </node>
  <node id="156379" label="ARNT" cy:nodeId="113211">
    <graphics y="-444.95602537507966" z="0.0" x="-164.8483680679476"/>
  </node>
  <node id="156079" label="OVOL2" cy:nodeId="118336">
    <graphics y="1704.258726822186" z="0.0" x="174.29618225553872"/>
  </node>
  <node id="156110" label="GALNT14" cy:nodeId="113215">
    <graphics y="-74.17455030794099" z="0.0" x="1209.103158573898"/>
  </node>
  <node id="156050" label="RXRG" cy:nodeId="118338">
    <graphics y="790.534117447186" z="0.0" x="-19.043898005691744"/>
  </node>
  <node id="156063" label="RARG" cy:nodeId="118337">
    <graphics y="250.57415650968596" z="0.0" x="-594.3235992386019"/>
  </node>
  <node id="156008" label="NEU4" cy:nodeId="113217">
    <graphics y="336.5026538241391" z="0.0" x="1189.335824589523"/>
  </node>
  <node id="156099" label="NFE2" cy:nodeId="113229">
    <graphics y="752.1580798495297" z="0.0" x="610.4890838668668"/>
  </node>
  <node id="156374" label="ARNTL" cy:nodeId="112214">
    <graphics y="-68.31382871980622" z="0.0" x="-586.5790924026644"/>
  </node>
  <node id="156333" label="BHLHE40" cy:nodeId="112215">
    <graphics y="-65.49640776033357" z="0.0" x="-750.9607452346957"/>
  </node>
  <node id="156242" label="DDX5" cy:nodeId="112218">
    <graphics y="-139.45400358552888" z="0.0" x="630.7827850387418"/>
  </node>
  <node id="156178" label="GLIS3" cy:nodeId="112220">
    <graphics y="-1373.451234115314" z="0.0" x="-147.08375587007163"/>
  </node>
  <node id="156154" label="HEXIM1" cy:nodeId="112221">
    <graphics y="1462.416685806561" z="0.0" x="331.4701019332731"/>
  </node>
  <node id="156368" label="B3GNT3" cy:nodeId="112223">
    <graphics y="150.60310243253753" z="0.0" x="-742.2493804886019"/>
  </node>
  <node id="156025" label="SUMO1" cy:nodeId="112231">
    <graphics y="1233.2324817049985" z="0.0" x="750.3805023238981"/>
  </node>
  <node id="156328" label="B4GALT1" cy:nodeId="107274">
    <graphics y="84.78785585050628" z="0.0" x="-788.3749298050082"/>
  </node>
  <node id="156323" label="BRD2" cy:nodeId="107276">
    <graphics y="-402.0339672696109" z="0.0" x="266.22260437467935"/>
  </node>
  <node id="156352" label="FUT10" cy:nodeId="107278">
    <graphics y="-878.1093762051578" z="0.0" x="-144.59531440278647"/>
  </node>
  <node id="156312" label="BRD3" cy:nodeId="107277">
    <graphics y="-849.8961193692203" z="0.0" x="-189.7825836136019"/>
  </node>
  <node id="156371" label="B4GALT5" cy:nodeId="107279">
    <graphics y="-6.450254691791088" z="0.0" x="-725.3862823440707"/>
  </node>
  <node id="156139" label="ALG8" cy:nodeId="107286">
    <graphics y="681.021177994061" z="0.0" x="965.5147796676481"/>
  </node>
  <node id="156143" label="FUT6" cy:nodeId="107288">
    <graphics y="327.99893067960784" z="0.0" x="-1053.6003326370394"/>
  </node>
  <node id="156331" label="FUT2" cy:nodeId="107287">
    <graphics y="243.06240724210784" z="0.0" x="-802.4166168167269"/>
  </node>
  <node id="156205" label="FUT3" cy:nodeId="107289">
    <graphics y="285.3704821932797" z="0.0" x="-905.8088897659457"/>
  </node>
  <node id="156373" label="PAPSS1" cy:nodeId="107291">
    <graphics y="-102.64193846101716" z="0.0" x="-654.3525299026644"/>
  </node>
  <node id="156206" label="FOSL1" cy:nodeId="107294">
    <graphics y="321.9978015292172" z="0.0" x="-640.1496490432894"/>
  </node>
  <node id="156202" label="HK1" cy:nodeId="107293">
    <graphics y="-71.50059629793122" z="0.0" x="858.5292449996793"/>
  </node>
  <node id="156220" label="GCNT2" cy:nodeId="107296">
    <graphics y="-41.45674063081697" z="0.0" x="958.4358001754606"/>
  </node>
  <node id="156378" label="GNE" cy:nodeId="107297">
    <graphics y="-601.6318371426578" z="0.0" x="55.40468750456216"/>
  </node>
  <node id="156164" label="GTF3C2" cy:nodeId="107302">
    <graphics y="-861.0073254239078" z="0.0" x="196.06842956999185"/>
  </node>
  <node id="156158" label="HDAC3" cy:nodeId="107304">
    <graphics y="-521.2086804043765" z="0.0" x="578.1842132613981"/>
  </node>
  <node id="156162" label="HDAC1" cy:nodeId="107303">
    <graphics y="735.538023697186" z="0.0" x="672.0320526168668"/>
  </node>
  <node id="156141" label="KAT2B" cy:nodeId="107312">
    <graphics y="-580.5441296231265" z="0.0" x="340.95075378874185"/>
  </node>
  <node id="156133" label="KDM5C" cy:nodeId="107314">
    <graphics y="-1147.1088268887515" z="0.0" x="-433.586080928055"/>
  </node>
  <node id="156161" label="SULT1A2" cy:nodeId="117555">
    <graphics y="991.6636950839047" z="0.0" x="720.1992889449918"/>
  </node>
  <node id="156132" label="KDM6B" cy:nodeId="107315">
    <graphics y="298.8695056307797" z="0.0" x="39.77428589323404"/>
  </node>
  <node id="156128" label="KLF5" cy:nodeId="107318">
    <graphics y="3.7031581271176037" z="0.0" x="-599.35536803743"/>
  </node>
  <node id="156115" label="MED12" cy:nodeId="107324">
    <graphics y="-668.9357922207828" z="0.0" x="-173.58958282014487"/>
  </node>
  <node id="156119" label="MBD3" cy:nodeId="107323">
    <graphics y="1045.221129165936" z="0.0" x="405.8249603317106"/>
  </node>
  <node id="156109" label="MEF2D" cy:nodeId="107325">
    <graphics y="-827.5737316739078" z="0.0" x="-735.9069732620394"/>
  </node>
  <node id="156321" label="POFUT2" cy:nodeId="107327">
    <graphics y="380.8896472323422" z="0.0" x="472.4648529098356"/>
  </node>
  <node id="156095" label="NFYA" cy:nodeId="107329">
    <graphics y="-970.575745834064" z="0.0" x="-255.3290161087191"/>
  </node>
  <node id="156024" label="PIGY" cy:nodeId="107332">
    <graphics y="1345.5144641268735" z="0.0" x="935.5529876754606"/>
  </node>
  <node id="156135" label="B4GALT6" cy:nodeId="107331">
    <graphics y="-225.38778807039216" z="0.0" x="195.97590027311685"/>
  </node>
  <node id="156074" label="PHF8" cy:nodeId="107334">
    <graphics y="-523.5795605313297" z="0.0" x="-333.4052947952425"/>
  </node>
  <node id="156082" label="NRF1" cy:nodeId="107333">
    <graphics y="118.13172792081878" z="0.0" x="209.43247375944497"/>
  </node>
  <node id="156072" label="PML" cy:nodeId="107336">
    <graphics y="473.8675219882016" z="0.0" x="-855.0311187698519"/>
  </node>
  <node id="156049" label="RYBP" cy:nodeId="107338">
    <graphics y="-24.027818216037304" z="0.0" x="-282.7616790725863"/>
  </node>
  <node id="156055" label="MPI" cy:nodeId="107340">
    <graphics y="1216.796080337811" z="0.0" x="626.9162078903043"/>
  </node>
  <node id="156043" label="SMAD3" cy:nodeId="107342">
    <graphics y="-133.2248852383609" z="0.0" x="-962.7668365432894"/>
  </node>
  <node id="156040" label="SMARCC1" cy:nodeId="107344">
    <graphics y="-699.8270886075015" z="0.0" x="-268.3085388137972"/>
  </node>
  <node id="156041" label="SMARCA4" cy:nodeId="107343">
    <graphics y="-230.2773754727359" z="0.0" x="-1180.6596588089144"/>
  </node>
  <node id="156037" label="SP2" cy:nodeId="107346">
    <graphics y="-636.835511459064" z="0.0" x="276.39167175749185"/>
  </node>
  <node id="156026" label="STAT6" cy:nodeId="107348">
    <graphics y="-169.14628721589997" z="0.0" x="-481.8898834182894"/>
  </node>
  <node id="156030" label="STAT3" cy:nodeId="107347">
    <graphics y="-439.2351391446109" z="0.0" x="-566.1487029983675"/>
  </node>
  <node id="156358" label="LAMP2" cy:nodeId="107350">
    <graphics y="-552.3285534512515" z="0.0" x="-611.7130035354769"/>
  </node>
  <node id="156018" label="SVIL" cy:nodeId="107349">
    <graphics y="-383.95553709382966" z="0.0" x="-896.4785675003207"/>
  </node>
  <node id="156016" label="TAF3" cy:nodeId="107351">
    <graphics y="-1039.8023693692203" z="0.0" x="-322.40134276887534"/>
  </node>
  <node id="156002" label="TFAP2C" cy:nodeId="107354">
    <graphics y="133.97415040617034" z="0.0" x="-828.4623931839144"/>
  </node>
  <node id="155991" label="VDR" cy:nodeId="107356">
    <graphics y="1804.258726822186" z="0.0" x="-1270.1063827469027"/>
  </node>
  <node id="156203" label="FOXA2" cy:nodeId="116606">
    <graphics y="103.45941041593596" z="0.0" x="969.1925140426481"/>
  </node>
  <node id="156176" label="GMEB1" cy:nodeId="120757">
    <graphics y="-1214.6994030606265" z="0.0" x="412.8396087692106"/>
  </node>
</graph>
