# Supplementary material for: A systems-based framework to computationally describe putative transcription factors and signaling pathways regulating glycan biosynthesis
Source: publisher site journal article supplement (doi:10.3762/bjoc.17.119), 2021-07-22
Supplement: Additional file 2 [file 1860-5397-17-119-S2.cys › CytoscapeSession-2021_03_21-12_01/views/126090-151992-THYM.xgmml]

<?xml version="1.0" encoding="UTF-8" standalone="yes"?>
<graph id="151992" label="THYM" cy:view="1" cy:networkId="126090" cy:visualStyle="default" cy:rendererId="org.cytoscape.ding" cy:documentVersion="3.0" xmlns:dc="http://purl.org/dc/elements/1.1/" xmlns:xlink="http://www.w3.org/1999/xlink" xmlns:rdf="http://www.w3.org/1999/02/22-rdf-syntax-ns#" xmlns:cy="http://www.cytoscape.org" xmlns="http://www.cs.rpi.edu/XGMML">
  <graphics>
    <att name="NETWORK_NODE_SELECTION" value="true" type="string" cy:type="String"/>
    <att name="NETWORK_CENTER_X_LOCATION" value="372.557373046875" type="string" cy:type="String"/>
    <att name="NETWORK_HEIGHT" value="510.0" type="string" cy:type="String"/>
    <att name="NETWORK_TITLE" value="THYM" type="string" cy:type="String"/>
    <att name="NETWORK_EDGE_SELECTION" value="true" type="string" cy:type="String"/>
    <att name="NETWORK_CENTER_Y_LOCATION" value="-511.568603515625" type="string" cy:type="String"/>
    <att name="NETWORK_WIDTH" value="1312.0" type="string" cy:type="String"/>
    <att name="NETWORK_DEPTH" value="0.0" type="string" cy:type="String"/>
    <att name="NETWORK_SCALE_FACTOR" value="0.09338669818269205" type="string" cy:type="String"/>
    <att name="NETWORK_ANNOTATION_SELECTION" value="false" type="string" cy:type="String"/>
    <att name="NETWORK_CENTER_Z_LOCATION" value="0.0" type="string" cy:type="String"/>
  </graphics>
  <node id="152307" label="GCNT1" cy:nodeId="108552">
    <graphics y="860.4364615338282" z="0.0" x="-429.85427188564336"/>
  </node>
  <node id="152430" label="UGDH" cy:nodeId="108551">
    <graphics y="436.2304678814844" z="0.0" x="-394.75267886806523"/>
  </node>
  <node id="152423" label="BACH2" cy:nodeId="108553">
    <graphics y="-903.1063241107031" z="0.0" x="126.6792364151379"/>
  </node>
  <node id="152347" label="PIGC" cy:nodeId="108558">
    <graphics y="2066.3217459576563" z="0.0" x="-1249.6481790511707"/>
  </node>
  <node id="152291" label="PIGF" cy:nodeId="108557">
    <graphics y="1105.2507925885157" z="0.0" x="-720.8813104598621"/>
  </node>
  <node id="152257" label="GALNT6" cy:nodeId="108561">
    <graphics y="-886.8566903216406" z="0.0" x="328.90708065341914"/>
  </node>
  <node id="152336" label="CEBPZ" cy:nodeId="108564">
    <graphics y="-251.11245814390622" z="0.0" x="-577.6309442489246"/>
  </node>
  <node id="152341" label="CEBPD" cy:nodeId="108563">
    <graphics y="1700.3311148541407" z="0.0" x="95.73035335849727"/>
  </node>
  <node id="152351" label="NAGA" cy:nodeId="108567">
    <graphics y="839.9548941510157" z="0.0" x="-97.67009830165898"/>
  </node>
  <node id="152306" label="DAXX" cy:nodeId="108569">
    <graphics y="-738.8947762591406" z="0.0" x="1072.0794439346691"/>
  </node>
  <node id="152298" label="DR1" cy:nodeId="108571">
    <graphics y="-413.28363123960935" z="0.0" x="-199.02995776821172"/>
  </node>
  <node id="152294" label="E2F2" cy:nodeId="108573">
    <graphics y="-944.0548714739843" z="0.0" x="1150.2607183487316"/>
  </node>
  <node id="152142" label="PIGL" cy:nodeId="108578">
    <graphics y="-634.3769539935156" z="0.0" x="-405.2208642928699"/>
  </node>
  <node id="152400" label="EXT1" cy:nodeId="108580">
    <graphics y="862.5447989361719" z="0.0" x="-327.1573572127918"/>
  </node>
  <node id="152419" label="ST3GAL1" cy:nodeId="108579">
    <graphics y="-1464.0386361224218" z="0.0" x="-97.98229312587773"/>
  </node>
  <node id="152258" label="EZH2" cy:nodeId="108582">
    <graphics y="-1074.1804818255468" z="0.0" x="531.5530157120129"/>
  </node>
  <node id="152360" label="UGP2" cy:nodeId="108584">
    <graphics y="-879.9552620989843" z="0.0" x="840.1372442276379"/>
  </node>
  <node id="152202" label="CHPF" cy:nodeId="108583">
    <graphics y="1398.8748160260157" z="0.0" x="-1074.737999912987"/>
  </node>
  <node id="152308" label="HEXB" cy:nodeId="108585">
    <graphics y="1069.4826041119532" z="0.0" x="-280.95226382900273"/>
  </node>
  <node id="152300" label="GAL3ST3" cy:nodeId="108590">
    <graphics y="917.2328482525782" z="0.0" x="-858.5179071395496"/>
  </node>
  <node id="152214" label="HDAC2" cy:nodeId="108592">
    <graphics y="-686.7589730364843" z="0.0" x="567.9230718643566"/>
  </node>
  <node id="152198" label="HIRA" cy:nodeId="108595">
    <graphics y="-498.52118006773435" z="0.0" x="-399.6046991317371"/>
  </node>
  <node id="152165" label="KLF15" cy:nodeId="108597">
    <graphics y="1022.6588126080469" z="0.0" x="-177.8069801299671"/>
  </node>
  <node id="152147" label="MBD4" cy:nodeId="108599">
    <graphics y="-676.2774666888281" z="0.0" x="-158.578488346825"/>
  </node>
  <node id="152135" label="MLLT1" cy:nodeId="108601">
    <graphics y="1136.3596793072657" z="0.0" x="-328.7739801375965"/>
  </node>
  <node id="152123" label="NCOR1" cy:nodeId="108603">
    <graphics y="109.87952336244143" z="0.0" x="-576.6895990340809"/>
  </node>
  <node id="152065" label="SATB1" cy:nodeId="108614">
    <graphics y="-733.0137948138281" z="0.0" x="79.2739629776379"/>
  </node>
  <node id="152052" label="SNAPC1" cy:nodeId="108618">
    <graphics y="456.28057774476565" z="0.0" x="-881.5875482528309"/>
  </node>
  <node id="152049" label="SOX4" cy:nodeId="108620">
    <graphics y="-1163.8925179583593" z="0.0" x="846.2935552627941"/>
  </node>
  <node id="152036" label="TAF7" cy:nodeId="108623">
    <graphics y="-495.9428719622656" z="0.0" x="-121.61639117885625"/>
  </node>
  <node id="152016" label="THAP1" cy:nodeId="108626">
    <graphics y="-549.1213387591406" z="0.0" x="-309.4482812850574"/>
  </node>
  <node id="152018" label="TFE3" cy:nodeId="108625">
    <graphics y="1392.9860220807032" z="0.0" x="-759.6347894637684"/>
  </node>
  <node id="152007" label="TRRAP" cy:nodeId="108628">
    <graphics y="-296.7069405657812" z="0.0" x="-679.6314020125965"/>
  </node>
  <node id="152012" label="TP53" cy:nodeId="108627">
    <graphics y="-877.5460824114843" z="0.0" x="530.5093755752941"/>
  </node>
  <node id="152124" label="NCAPG2" cy:nodeId="117858">
    <graphics y="-500.51495448179685" z="0.0" x="668.8578863174816"/>
  </node>
  <node id="152288" label="UXS1" cy:nodeId="109669">
    <graphics y="878.2824087994532" z="0.0" x="-527.411797520409"/>
  </node>
  <node id="152383" label="ALG2" cy:nodeId="109671">
    <graphics y="693.0316153424219" z="0.0" x="-299.622490879784"/>
  </node>
  <node id="152246" label="GLB1" cy:nodeId="109675">
    <graphics y="1045.4880362408594" z="0.0" x="-383.379326817284"/>
  </node>
  <node id="152239" label="GATA3" cy:nodeId="109677">
    <graphics y="-765.9418953997656" z="0.0" x="739.4501104385754"/>
  </node>
  <node id="152303" label="NAGLU" cy:nodeId="109680">
    <graphics y="1277.4424429791407" z="0.0" x="-1251.7569818465809"/>
  </node>
  <node id="152206" label="HEY1" cy:nodeId="109679">
    <graphics y="1552.2826529400782" z="0.0" x="-708.6507196395496"/>
  </node>
  <node id="152157" label="LMNB1" cy:nodeId="109681">
    <graphics y="-756.4158333880468" z="0.0" x="538.2372198135754"/>
  </node>
  <node id="152131" label="MXD1" cy:nodeId="109683">
    <graphics y="-727.0800179583593" z="0.0" x="-268.5787973373035"/>
  </node>
  <node id="152053" label="SNAI2" cy:nodeId="109686">
    <graphics y="902.4765616314844" z="0.0" x="-73.2961282699207"/>
  </node>
  <node id="152323" label="PIGG" cy:nodeId="109689">
    <graphics y="-1.9825600726171615" z="0.0" x="-475.5281305282215"/>
  </node>
  <node id="151999" label="WRNIP1" cy:nodeId="109692">
    <graphics y="428.2775870221094" z="0.0" x="-648.8699884383777"/>
  </node>
  <node id="152017" label="TGIF1" cy:nodeId="109691">
    <graphics y="1142.4545279400782" z="0.0" x="-184.93277835536992"/>
  </node>
  <node id="152411" label="BCLAF1" cy:nodeId="126100">
    <graphics y="286.8948508160547" z="0.0" x="-899.3619623153309"/>
  </node>
  <node id="152330" label="CHD3" cy:nodeId="126102">
    <graphics y="-262.9587411028906" z="0.0" x="-990.2477655379871"/>
  </node>
  <node id="152359" label="LCT" cy:nodeId="126101">
    <graphics y="-883.4116219622656" z="0.0" x="936.1105718643566"/>
  </node>
  <node id="152204" label="HS6ST2" cy:nodeId="126104">
    <graphics y="1508.4849234478907" z="0.0" x="-617.5565118758777"/>
  </node>
  <node id="152317" label="CREM" cy:nodeId="126103">
    <graphics y="2037.5114127057032" z="0.0" x="-1514.6875162093738"/>
  </node>
  <node id="152121" label="NFATC3" cy:nodeId="126106">
    <graphics y="-1300.0596322161718" z="0.0" x="766.2455816299816"/>
  </node>
  <node id="152197" label="HIST1H1B" cy:nodeId="126105">
    <graphics y="-1255.3810433489843" z="0.0" x="1524.2281255752941"/>
  </node>
  <node id="152106" label="PBX2" cy:nodeId="126108">
    <graphics y="622.6590567486719" z="0.0" x="-1005.2134027450184"/>
  </node>
  <node id="152120" label="NFIB" cy:nodeId="126107">
    <graphics y="1710.2212515728907" z="0.0" x="-139.5128316848377"/>
  </node>
  <node id="152009" label="TP73" cy:nodeId="126110">
    <graphics y="1070.165404404922" z="0.0" x="-517.4589776961902"/>
  </node>
  <node id="152051" label="SOX15" cy:nodeId="126109">
    <graphics y="-608.2707528216406" z="0.0" x="-884.3380975692371"/>
  </node>
  <node id="152410" label="BCOR" cy:nodeId="110788">
    <graphics y="-556.1198739153906" z="0.0" x="-215.7149744002918"/>
  </node>
  <node id="152369" label="BTAF1" cy:nodeId="110789">
    <graphics y="-69.04060450621091" z="0.0" x="-810.0207147567371"/>
  </node>
  <node id="152338" label="CEBPG" cy:nodeId="110791">
    <graphics y="348.77996739320315" z="0.0" x="-1278.2307367293934"/>
  </node>
  <node id="152304" label="DDIT3" cy:nodeId="110793">
    <graphics y="1364.3253775494532" z="0.0" x="-1417.4763421981434"/>
  </node>
  <node id="152223" label="GTF3C1" cy:nodeId="110795">
    <graphics y="-112.26585475035154" z="0.0" x="-1430.2219476668934"/>
  </node>
  <node id="152161" label="LARP7" cy:nodeId="110798">
    <graphics y="-412.7563180071875" z="0.0" x="621.7791509659191"/>
  </node>
  <node id="152134" label="MLLT3" cy:nodeId="110800">
    <graphics y="-416.5267342669531" z="0.0" x="-291.5093088119129"/>
  </node>
  <node id="152133" label="MNT" cy:nodeId="110801">
    <graphics y="347.58746251039065" z="0.0" x="-688.0865106551746"/>
  </node>
  <node id="152136" label="SGSH" cy:nodeId="110804">
    <graphics y="1123.5855093853907" z="0.0" x="-556.7470941512684"/>
  </node>
  <node id="152116" label="NME2" cy:nodeId="110803">
    <graphics y="-1684.3475960833593" z="0.0" x="1774.7953863174816"/>
  </node>
  <node id="152435" label="GALK2" cy:nodeId="110806">
    <graphics y="-353.7898263079687" z="0.0" x="-3.606301304588669"/>
  </node>
  <node id="152415" label="FUT7" cy:nodeId="105685">
    <graphics y="-2221.810608778672" z="0.0" x="-489.5801629989246"/>
  </node>
  <node id="152445" label="STT3B" cy:nodeId="105688">
    <graphics y="216.84661778382815" z="0.0" x="-227.33741855312383"/>
  </node>
  <node id="152113" label="NR1H3" cy:nodeId="110807">
    <graphics y="1995.041655625625" z="0.0" x="-380.3032999007801"/>
  </node>
  <node id="152433" label="MAN1A2" cy:nodeId="105687">
    <graphics y="455.3190909283594" z="0.0" x="-176.30374431301152"/>
  </node>
  <node id="152443" label="FUT11" cy:nodeId="105690">
    <graphics y="345.2242117779688" z="0.0" x="-268.4336328475574"/>
  </node>
  <node id="152095" label="PPARGC1A" cy:nodeId="110809">
    <graphics y="-2654.409241591172" z="0.0" x="1726.2288579971691"/>
  </node>
  <node id="152441" label="NEU3" cy:nodeId="105689">
    <graphics y="-71.38180628843747" z="0.0" x="-194.9051542251209"/>
  </node>
  <node id="152327" label="COG5" cy:nodeId="105692">
    <graphics y="377.9465628521875" z="0.0" x="-80.50210666347539"/>
  </node>
  <node id="152432" label="ACER2" cy:nodeId="105691">
    <graphics y="203.7263174908594" z="0.0" x="-108.06989001918828"/>
  </node>
  <node id="152014" label="TOP1" cy:nodeId="110814">
    <graphics y="-776.9218148333593" z="0.0" x="-75.23352145839726"/>
  </node>
  <node id="152442" label="MAN2A1" cy:nodeId="105694">
    <graphics y="-12.389115248398411" z="0.0" x="-55.11150455165898"/>
  </node>
  <node id="152384" label="SLC35F5" cy:nodeId="105696">
    <graphics y="709.6502676861719" z="0.0" x="-218.54546069789922"/>
  </node>
  <node id="152013" label="TOP2B" cy:nodeId="110815">
    <graphics y="-551.1842660052343" z="0.0" x="-17.90940189052617"/>
  </node>
  <node id="152444" label="SLC35A3" cy:nodeId="105695">
    <graphics y="-42.256134901718724" z="0.0" x="-94.82940768886601"/>
  </node>
  <node id="152367" label="GALNT10" cy:nodeId="105697">
    <graphics y="338.1217032330469" z="0.0" x="-21.195260044823044"/>
  </node>
  <node id="152455" label="RTF1" cy:nodeId="105700">
    <graphics y="-11.99659052916013" z="0.0" x="-226.25975894619023"/>
  </node>
  <node id="152456" label="ARID2" cy:nodeId="105699">
    <graphics y="-293.0155343157812" z="0.0" x="-278.87998294521367"/>
  </node>
  <node id="152446" label="SLC35A5" cy:nodeId="105702">
    <graphics y="404.518218125625" z="0.0" x="-365.33799075771367"/>
  </node>
  <node id="152447" label="ATF1" cy:nodeId="105701">
    <graphics y="35.53507908753909" z="0.0" x="-175.04690932918584"/>
  </node>
  <node id="152434" label="ATF2" cy:nodeId="105704">
    <graphics y="314.0486136334375" z="0.0" x="-129.9330682723621"/>
  </node>
  <node id="152405" label="GALNT4" cy:nodeId="105703">
    <graphics y="622.8535757916407" z="0.0" x="-159.57186031032597"/>
  </node>
  <node id="152374" label="UGGT1" cy:nodeId="105705">
    <graphics y="11.081053818984401" z="0.0" x="-131.72633456874883"/>
  </node>
  <node id="152232" label="B3GNT5" cy:nodeId="105707">
    <graphics y="957.1329947369532" z="0.0" x="190.13190365146602"/>
  </node>
  <node id="152429" label="ATRX" cy:nodeId="105712">
    <graphics y="61.16346463136233" z="0.0" x="-771.5815668075184"/>
  </node>
  <node id="152406" label="ALG10" cy:nodeId="105711">
    <graphics y="103.59683522157229" z="0.0" x="-358.455986973534"/>
  </node>
  <node id="152273" label="FKTN" cy:nodeId="105713">
    <graphics y="439.05718907289065" z="0.0" x="-64.0844354598621"/>
  </node>
  <node id="152334" label="NDST3" cy:nodeId="114932">
    <graphics y="-482.4016121966406" z="0.0" x="568.6183843643566"/>
  </node>
  <node id="152439" label="MAN1A1" cy:nodeId="105716">
    <graphics y="21.768332566542995" z="0.0" x="35.58113766025508"/>
  </node>
  <node id="152417" label="CSGALNACT2" cy:nodeId="105715">
    <graphics y="-396.61407557554685" z="0.0" x="111.2670049698254"/>
  </node>
  <node id="152421" label="CHST11" cy:nodeId="105718">
    <graphics y="-686.8956307513281" z="0.0" x="391.8714971573254"/>
  </node>
  <node id="152388" label="CHSY1" cy:nodeId="105717">
    <graphics y="735.4155875103907" z="0.0" x="-255.13422488857304"/>
  </node>
  <node id="152149" label="DPM3" cy:nodeId="105722">
    <graphics y="-1615.6397103411718" z="0.0" x="1583.5951910049816"/>
  </node>
  <node id="152228" label="GRHL3" cy:nodeId="114938">
    <graphics y="1995.041655625625" z="0.0" x="-579.8701257674793"/>
  </node>
  <node id="152416" label="BATF" cy:nodeId="105721">
    <graphics y="-2211.939515028672" z="0.0" x="-609.5735101668934"/>
  </node>
  <node id="152409" label="BMI1" cy:nodeId="105726">
    <graphics y="549.6076651471094" z="0.0" x="-360.9892206161121"/>
  </node>
  <node id="152414" label="BCAT1" cy:nodeId="105725">
    <graphics y="-119.6492928607031" z="0.0" x="855.2492437393566"/>
  </node>
  <node id="152333" label="AGA" cy:nodeId="114944">
    <graphics y="-630.0982064349218" z="0.0" x="489.34433651279414"/>
  </node>
  <node id="152392" label="BRCA1" cy:nodeId="105728">
    <graphics y="-675.1844491107031" z="0.0" x="783.3220586807629"/>
  </node>
  <node id="152408" label="ALG10B" cy:nodeId="105727">
    <graphics y="289.6912833111719" z="0.0" x="-375.7214441268543"/>
  </node>
  <node id="152114" label="NR1D1" cy:nodeId="114946">
    <graphics y="1644.8292837994532" z="0.0" x="-33.850289341698044"/>
  </node>
  <node id="152344" label="PIGN" cy:nodeId="105730">
    <graphics y="82.63287147454776" z="0.0" x="-250.30622958828008"/>
  </node>
  <node id="152096" label="POLR3GL" cy:nodeId="114948">
    <graphics y="1985.7440787213282" z="0.0" x="-1178.570603367577"/>
  </node>
  <node id="152454" label="SLC35E3" cy:nodeId="105732">
    <graphics y="-102.70086756773435" z="0.0" x="-138.14341067958867"/>
  </node>
  <node id="152407" label="FAM20B" cy:nodeId="105731">
    <graphics y="613.2336417096094" z="0.0" x="-484.17470645595586"/>
  </node>
  <node id="152125" label="ALG12" cy:nodeId="105734">
    <graphics y="1985.7440787213282" z="0.0" x="-1078.570603367577"/>
  </node>
  <node id="152066" label="SAP30" cy:nodeId="114949">
    <graphics y="-1931.6618050677343" z="0.0" x="1128.0893316299816"/>
  </node>
  <node id="152389" label="BRD1" cy:nodeId="105733">
    <graphics y="792.0477896588282" z="0.0" x="-418.3665094344715"/>
  </node>
  <node id="152148" label="PMM1" cy:nodeId="105735">
    <graphics y="-1953.9677132708593" z="0.0" x="1576.8338384659191"/>
  </node>
  <node id="152366" label="CASP8AP2" cy:nodeId="105738">
    <graphics y="-82.56315699644529" z="0.0" x="-475.33043765712773"/>
  </node>
  <node id="152015" label="TLE3" cy:nodeId="114953">
    <graphics y="-2929.661438856797" z="0.0" x="1749.1567144424816"/>
  </node>
  <node id="152340" label="HYAL2" cy:nodeId="105737">
    <graphics y="1347.9562369244532" z="0.0" x="-74.49436282802617"/>
  </node>
  <node id="152385" label="GALNS" cy:nodeId="105740">
    <graphics y="1027.3114615338282" z="0.0" x="-838.4696893661121"/>
  </node>
  <node id="152365" label="CBFB" cy:nodeId="105739">
    <graphics y="-496.3524178607031" z="0.0" x="171.3747930557629"/>
  </node>
  <node id="152240" label="CMAS" cy:nodeId="105742">
    <graphics y="127.33550557069339" z="0.0" x="58.94220638584102"/>
  </node>
  <node id="152361" label="CBX3" cy:nodeId="105741">
    <graphics y="-860.0706185442968" z="0.0" x="761.9983892471691"/>
  </node>
  <node id="152104" label="RFNG" cy:nodeId="105744">
    <graphics y="1985.7440787213282" z="0.0" x="-879.0037775008777"/>
  </node>
  <node id="152355" label="CBX7" cy:nodeId="105745">
    <graphics y="595.9567862408594" z="0.0" x="-7.334389683494919"/>
  </node>
  <node id="152268" label="MAN2A2" cy:nodeId="105748">
    <graphics y="419.2821951764063" z="0.0" x="8.320349696387893"/>
  </node>
  <node id="152394" label="MGAT3" cy:nodeId="105750">
    <graphics y="741.2286978619532" z="0.0" x="-1034.1270990340809"/>
  </node>
  <node id="152350" label="CBX8" cy:nodeId="105752">
    <graphics y="-939.5111703021093" z="0.0" x="1021.9816656143566"/>
  </node>
  <node id="152321" label="B3GAT3" cy:nodeId="105754">
    <graphics y="-1812.1021126849218" z="0.0" x="1641.0166997940441"/>
  </node>
  <node id="152295" label="GALK1" cy:nodeId="105753">
    <graphics y="-1524.2915658099218" z="0.0" x="1241.8743658096691"/>
  </node>
  <node id="152346" label="CDK8" cy:nodeId="105756">
    <graphics y="79.66592204145945" z="0.0" x="-206.62452792812383"/>
  </node>
  <node id="152150" label="DPM2" cy:nodeId="105758">
    <graphics y="-1674.1389779192968" z="0.0" x="1501.3892583877941"/>
  </node>
  <node id="152343" label="CDK9" cy:nodeId="105757">
    <graphics y="-1083.6224984271093" z="0.0" x="1063.7640142471691"/>
  </node>
  <node id="152193" label="MFNG" cy:nodeId="105766">
    <graphics y="-1287.7080697161718" z="0.0" x="936.6631841690441"/>
  </node>
  <node id="152227" label="NAGK" cy:nodeId="105765">
    <graphics y="1985.7440787213282" z="0.0" x="-679.4369516341785"/>
  </node>
  <node id="152205" label="A4GALT" cy:nodeId="105768">
    <graphics y="1269.6514273541407" z="0.0" x="-613.9248590438465"/>
  </node>
  <node id="152331" label="CHD2" cy:nodeId="105770">
    <graphics y="486.67779454164065" z="0.0" x="-407.9269189803699"/>
  </node>
  <node id="152335" label="CHD1" cy:nodeId="105769">
    <graphics y="-602.5272835833593" z="0.0" x="393.15378475498164"/>
  </node>
  <node id="152390" label="NDST2" cy:nodeId="105772">
    <graphics y="-584.3051156146093" z="0.0" x="566.3964605362316"/>
  </node>
  <node id="152325" label="OGT" cy:nodeId="105771">
    <graphics y="-38.83326045103513" z="0.0" x="70.43488216709102"/>
  </node>
  <node id="152328" label="CHD8" cy:nodeId="105774">
    <graphics y="92.49073704652346" z="0.0" x="-153.64162635494267"/>
  </node>
  <node id="152329" label="CHD4" cy:nodeId="105773">
    <graphics y="-1242.2728890521093" z="0.0" x="592.9764165909191"/>
  </node>
  <node id="152010" label="LAMP3" cy:nodeId="105776">
    <graphics y="1217.1054068463282" z="0.0" x="219.60962581943477"/>
  </node>
  <node id="152358" label="GAL3ST4" cy:nodeId="105778">
    <graphics y="-970.5075081927343" z="0.0" x="761.4239873917004"/>
  </node>
  <node id="152155" label="MAN2B1" cy:nodeId="105777">
    <graphics y="-2529.613343153672" z="0.0" x="-724.3744745223621"/>
  </node>
  <node id="152322" label="CPSF3L" cy:nodeId="105780">
    <graphics y="-1922.2589730364843" z="0.0" x="1788.6055669815441"/>
  </node>
  <node id="152395" label="DSE" cy:nodeId="105779">
    <graphics y="802.4272452252344" z="0.0" x="-266.0201730697254"/>
  </node>
  <node id="152320" label="CREB3" cy:nodeId="105786">
    <graphics y="-1514.7809456927343" z="0.0" x="1824.5456304581066"/>
  </node>
  <node id="152319" label="GMPPA" cy:nodeId="105787">
    <graphics y="-1518.2400521380468" z="0.0" x="1625.5558843643566"/>
  </node>
  <node id="152318" label="CREBBP" cy:nodeId="105790">
    <graphics y="246.7382040875391" z="0.0" x="-350.4673395125965"/>
  </node>
  <node id="152262" label="B4GALT3" cy:nodeId="105789">
    <graphics y="-2807.152161513047" z="0.0" x="1963.9683599502941"/>
  </node>
  <node id="152247" label="POFUT1" cy:nodeId="105792">
    <graphics y="710.0017691510157" z="0.0" x="33.87380123447383"/>
  </node>
  <node id="152025" label="COG7" cy:nodeId="105791">
    <graphics y="667.2033072369532" z="0.0" x="-700.2748651473621"/>
  </node>
  <node id="152313" label="CTNNB1" cy:nodeId="105794">
    <graphics y="672.8197623150782" z="0.0" x="-414.794854161034"/>
  </node>
  <node id="152314" label="CTBP1" cy:nodeId="105793">
    <graphics y="-1379.5457162005468" z="0.0" x="1581.5965337784191"/>
  </node>
  <node id="152296" label="E2F1" cy:nodeId="105796">
    <graphics y="-1282.1015023333593" z="0.0" x="1159.5098638565441"/>
  </node>
  <node id="152302" label="DEK" cy:nodeId="105795">
    <graphics y="-673.5148324114843" z="0.0" x="-51.62412357021367"/>
  </node>
  <node id="152280" label="ALG3" cy:nodeId="105797">
    <graphics y="-1731.9075326067968" z="0.0" x="1397.9767828018566"/>
  </node>
  <node id="152316" label="DPM1" cy:nodeId="105799">
    <graphics y="2089.195677842422" z="0.0" x="-1608.5005121200184"/>
  </node>
  <node id="152292" label="E2F6" cy:nodeId="105801">
    <graphics y="785.1760245221094" z="0.0" x="-343.1913690536121"/>
  </node>
  <node id="152283" label="E2F7" cy:nodeId="105803">
    <graphics y="-291.61630335875" z="0.0" x="259.95273495029414"/>
  </node>
  <node id="152413" label="ST3GAL2" cy:nodeId="105806">
    <graphics y="-196.8472909075781" z="0.0" x="623.4530401260754"/>
  </node>
  <node id="152107" label="CHST3" cy:nodeId="105807">
    <graphics y="1031.7119742291407" z="0.0" x="304.3102178604504"/>
  </node>
  <node id="152377" label="FUT4" cy:nodeId="105810">
    <graphics y="-96.26284876890622" z="0.0" x="-686.0142450301746"/>
  </node>
  <node id="152201" label="TPST1" cy:nodeId="105809">
    <graphics y="1170.1874380963282" z="0.0" x="-625.3395929305652"/>
  </node>
  <node id="152192" label="ST3GAL6" cy:nodeId="105811">
    <graphics y="-974.3806771380468" z="0.0" x="429.5032110245129"/>
  </node>
  <node id="152376" label="PIGK" cy:nodeId="106835">
    <graphics y="461.036284531875" z="0.0" x="-348.3920068709949"/>
  </node>
  <node id="152452" label="B3GNT2" cy:nodeId="106838">
    <graphics y="-211.96563807554685" z="0.0" x="70.16091060947383"/>
  </node>
  <node id="152282" label="EGLN2" cy:nodeId="105813">
    <graphics y="-1679.0138558489843" z="0.0" x="1280.6576910049816"/>
  </node>
  <node id="152451" label="ASCL2" cy:nodeId="106837">
    <graphics y="1494.5850211041407" z="0.0" x="458.22678280185664"/>
  </node>
  <node id="152182" label="TPST2" cy:nodeId="106840">
    <graphics y="-1785.9216927630468" z="0.0" x="-204.45320224453008"/>
  </node>
  <node id="152279" label="EGR2" cy:nodeId="105816">
    <graphics y="-441.85223475523435" z="0.0" x="-42.48641299892461"/>
  </node>
  <node id="152266" label="ST6GALNAC3" cy:nodeId="105815">
    <graphics y="776.2806387799219" z="0.0" x="-730.6599969832996"/>
  </node>
  <node id="152224" label="UAP1" cy:nodeId="105820">
    <graphics y="589.8347769635157" z="0.0" x="181.77435970615352"/>
  </node>
  <node id="152353" label="SLC35E1" cy:nodeId="106844">
    <graphics y="547.0002127545313" z="0.0" x="-62.465775486717575"/>
  </node>
  <node id="152372" label="BRD4" cy:nodeId="106843">
    <graphics y="312.70094212464846" z="0.0" x="-223.95976733852422"/>
  </node>
  <node id="152278" label="ELF1" cy:nodeId="105822">
    <graphics y="-148.0823983294531" z="0.0" x="42.993948939551956"/>
  </node>
  <node id="152269" label="COG6" cy:nodeId="105824">
    <graphics y="278.3903342144922" z="0.0" x="-32.18285464931523"/>
  </node>
  <node id="152357" label="CBX6" cy:nodeId="106847">
    <graphics y="-59.49607935972654" z="0.0" x="-1274.2004632918934"/>
  </node>
  <node id="152437" label="COG3" cy:nodeId="105823">
    <graphics y="253.57784947328128" z="0.0" x="-253.20151614833867"/>
  </node>
  <node id="152305" label="DCP1A" cy:nodeId="106850">
    <graphics y="199.42282017640628" z="0.0" x="-522.3763666122059"/>
  </node>
  <node id="152276" label="ELF2" cy:nodeId="105825">
    <graphics y="344.043120469375" z="0.0" x="266.5891485245129"/>
  </node>
  <node id="152275" label="ELL" cy:nodeId="105828">
    <graphics y="1216.3600455182032" z="0.0" x="-22.672326084862107"/>
  </node>
  <node id="152270" label="ERCC6" cy:nodeId="105830">
    <graphics y="391.49005040101565" z="0.0" x="-154.88803195644414"/>
  </node>
  <node id="152311" label="XYLT1" cy:nodeId="106854">
    <graphics y="742.6630850689844" z="0.0" x="-607.2602472274402"/>
  </node>
  <node id="152274" label="EP400" cy:nodeId="105829">
    <graphics y="466.5646658795313" z="0.0" x="-267.29293918300664"/>
  </node>
  <node id="152354" label="MAN1C1" cy:nodeId="106853">
    <graphics y="799.1873160260157" z="0.0" x="288.3829717667004"/>
  </node>
  <node id="152267" label="ERG" cy:nodeId="105832">
    <graphics y="662.6757193463282" z="0.0" x="-608.5983819930652"/>
  </node>
  <node id="152418" label="ST6GAL1" cy:nodeId="106855">
    <graphics y="-1157.5285042864843" z="0.0" x="113.1346807510754"/>
  </node>
  <node id="152420" label="ST8SIA4" cy:nodeId="105834">
    <graphics y="-718.5086068255468" z="0.0" x="190.4285039932629"/>
  </node>
  <node id="152422" label="GCNT4" cy:nodeId="106858">
    <graphics y="-617.7037972552343" z="0.0" x="94.6417608292004"/>
  </node>
  <node id="152332" label="ST3GAL5" cy:nodeId="106857">
    <graphics y="-788.2475594622656" z="0.0" x="423.6229620010754"/>
  </node>
  <node id="152362" label="MGAT4A" cy:nodeId="106860">
    <graphics y="-409.4249276263281" z="0.0" x="241.90805721591914"/>
  </node>
  <node id="152364" label="GALNT7" cy:nodeId="106859">
    <graphics y="-520.3165291888281" z="0.0" x="373.09445858310664"/>
  </node>
  <node id="152242" label="FUS" cy:nodeId="106862">
    <graphics y="-1291.4627083880468" z="0.0" x="1655.1207037002941"/>
  </node>
  <node id="152249" label="CHST2" cy:nodeId="105838">
    <graphics y="-1208.4979867083593" z="0.0" x="722.8857183487316"/>
  </node>
  <node id="152024" label="SULT1C4" cy:nodeId="105837">
    <graphics y="757.6353140728907" z="0.0" x="-849.7740106551746"/>
  </node>
  <node id="152309" label="CHST15" cy:nodeId="106861">
    <graphics y="778.0593253033594" z="0.0" x="-116.82819080043828"/>
  </node>
  <node id="152094" label="GPI" cy:nodeId="106864">
    <graphics y="-2360.707337294297" z="0.0" x="1452.1404790909191"/>
  </node>
  <node id="152265" label="ETS1" cy:nodeId="105839">
    <graphics y="-412.1793221575781" z="0.0" x="180.35031795810664"/>
  </node>
  <node id="152233" label="GRHL1" cy:nodeId="106866">
    <graphics y="899.3930045025782" z="0.0" x="289.3888311417004"/>
  </node>
  <node id="152089" label="HS3ST3B1" cy:nodeId="105841">
    <graphics y="-68.83065882749997" z="0.0" x="-390.90512942958867"/>
  </node>
  <node id="152234" label="GPS2" cy:nodeId="106865">
    <graphics y="-1739.5601204974218" z="0.0" x="1178.0846929581066"/>
  </node>
  <node id="152272" label="EXTL2" cy:nodeId="105844">
    <graphics y="224.1343222516016" z="0.0" x="-0.7978754012683567"/>
  </node>
  <node id="152440" label="MGAT2" cy:nodeId="106868">
    <graphics y="-137.52114955015622" z="0.0" x="-105.27467059780156"/>
  </node>
  <node id="152396" label="ARSB" cy:nodeId="105843">
    <graphics y="738.6246329205469" z="0.0" x="-390.6296472518543"/>
  </node>
  <node id="152259" label="EZH1" cy:nodeId="105846">
    <graphics y="-178.4160164935156" z="0.0" x="-461.6091852157215"/>
  </node>
  <node id="152397" label="GALC" cy:nodeId="106869">
    <graphics y="718.4499503033594" z="0.0" x="-157.90640258480107"/>
  </node>
  <node id="152403" label="SLC35B4" cy:nodeId="105845">
    <graphics y="128.5880576031641" z="0.0" x="-308.5231103866199"/>
  </node>
  <node id="152187" label="IRF3" cy:nodeId="106872">
    <graphics y="-1592.2123421771093" z="0.0" x="1358.0894537002941"/>
  </node>
  <node id="152256" label="FLI1" cy:nodeId="105848">
    <graphics y="-762.4363412005468" z="0.0" x="333.88449764560664"/>
  </node>
  <node id="152188" label="IRF2" cy:nodeId="106871">
    <graphics y="-592.4141854388281" z="0.0" x="209.4570684463879"/>
  </node>
  <node id="152171" label="KDM4A" cy:nodeId="106874">
    <graphics y="263.1891775982813" z="0.0" x="-679.4697504012684"/>
  </node>
  <node id="152159" label="LEF1" cy:nodeId="106875">
    <graphics y="-797.6761483294531" z="0.0" x="830.6271734268566"/>
  </node>
  <node id="152401" label="GLCE" cy:nodeId="105851">
    <graphics y="625.3458853619532" z="0.0" x="-80.72329044033086"/>
  </node>
  <node id="152250" label="FOXM1" cy:nodeId="105853">
    <graphics y="-1038.0873421771093" z="0.0" x="716.2496099502941"/>
  </node>
  <node id="152248" label="FOXO1" cy:nodeId="105856">
    <graphics y="793.1063834088282" z="0.0" x="-193.95893954921758"/>
  </node>
  <node id="152337" label="GNPNAT1" cy:nodeId="105855">
    <graphics y="361.2880545514063" z="0.0" x="-995.9587640731434"/>
  </node>
  <node id="152370" label="ALG6" cy:nodeId="106879">
    <graphics y="-463.6571053607031" z="0.0" x="404.59470272373164"/>
  </node>
  <node id="152402" label="GFPT1" cy:nodeId="106882">
    <graphics y="292.2757254498438" z="0.0" x="-276.30133914638554"/>
  </node>
  <node id="152087" label="RARA" cy:nodeId="106884">
    <graphics y="999.7625723736719" z="0.0" x="-331.5158777206043"/>
  </node>
  <node id="152184" label="HK3" cy:nodeId="105859">
    <graphics y="-1693.6453255755468" z="0.0" x="-122.4688692062"/>
  </node>
  <node id="152059" label="SMAD2" cy:nodeId="106886">
    <graphics y="-94.36540309019529" z="0.0" x="-22.441063877830857"/>
  </node>
  <node id="152062" label="SIRT6" cy:nodeId="106885">
    <graphics y="-1618.5203255755468" z="0.0" x="1450.7560796768566"/>
  </node>
  <node id="152241" label="GABPA" cy:nodeId="105861">
    <graphics y="247.1862021344141" z="0.0" x="-305.3549890487293"/>
  </node>
  <node id="152047" label="SPIB" cy:nodeId="106888">
    <graphics y="-2309.330384169297" z="0.0" x="-395.1427087752918"/>
  </node>
  <node id="152172" label="ALG13" cy:nodeId="105864">
    <graphics y="-50.048737440781224" z="0.0" x="-563.658867832909"/>
  </node>
  <node id="152238" label="GATAD1" cy:nodeId="105863">
    <graphics y="667.8317862408594" z="0.0" x="-42.738907810936325"/>
  </node>
  <node id="152236" label="GLYR1" cy:nodeId="105866">
    <graphics y="287.2534933941797" z="0.0" x="-496.9482965438465"/>
  </node>
  <node id="152032" label="TBX21" cy:nodeId="106889">
    <graphics y="-2352.752991591172" z="0.0" x="-518.1911249129871"/>
  </node>
  <node id="152356" label="COG8" cy:nodeId="106891">
    <graphics y="3.0647726910547135" z="0.0" x="-1063.7822504012684"/>
  </node>
  <node id="152380" label="CTBS" cy:nodeId="105869">
    <graphics y="394.8487234967188" z="0.0" x="-435.99746036220586"/>
  </node>
  <node id="152398" label="STT3A" cy:nodeId="106893">
    <graphics y="575.9166251080469" z="0.0" x="-577.205010411034"/>
  </node>
  <node id="152220" label="H2AFX" cy:nodeId="105872">
    <graphics y="-1166.9180306536718" z="0.0" x="1115.4456548721691"/>
  </node>
  <node id="152226" label="GTF2I" cy:nodeId="105871">
    <graphics y="272.2949515240625" z="0.0" x="-194.2737188308338"/>
  </node>
  <node id="152326" label="PIGO" cy:nodeId="105874">
    <graphics y="327.1861258404688" z="0.0" x="-433.66176700283086"/>
  </node>
  <node id="152218" label="HCFC1" cy:nodeId="105873">
    <graphics y="-635.1904915911718" z="0.0" x="977.4892339737316"/>
  </node>
  <node id="152209" label="HES4" cy:nodeId="105876">
    <graphics y="-1655.0529183489843" z="0.0" x="1111.3592290909191"/>
  </node>
  <node id="152200" label="HINFP" cy:nodeId="105877">
    <graphics y="-263.793305311875" z="0.0" x="1639.8743658096691"/>
  </node>
  <node id="152342" label="TSTA3" cy:nodeId="105880">
    <graphics y="-1376.3670052630468" z="0.0" x="1401.6780767471691"/>
  </node>
  <node id="152194" label="IKZF1" cy:nodeId="105882">
    <graphics y="-868.7073372942968" z="0.0" x="417.65329647373164"/>
  </node>
  <node id="152112" label="GPAA1" cy:nodeId="105881">
    <graphics y="1985.7440787213282" z="0.0" x="-479.8701257674793"/>
  </node>
  <node id="152097" label="LIPA" cy:nodeId="105884">
    <graphics y="251.12164219789065" z="0.0" x="365.67356014560664"/>
  </node>
  <node id="152189" label="INTS3" cy:nodeId="105886">
    <graphics y="176.39906224183596" z="0.0" x="-857.0309076278309"/>
  </node>
  <node id="152190" label="INO80" cy:nodeId="105885">
    <graphics y="549.7189322369532" z="0.0" x="-261.61522769619023"/>
  </node>
  <node id="152185" label="IRF8" cy:nodeId="105890">
    <graphics y="-1582.9484261614843" z="0.0" x="-59.12627505947148"/>
  </node>
  <node id="152177" label="JMJD1C" cy:nodeId="105892">
    <graphics y="502.14276036195315" z="0.0" x="-208.88888644863164"/>
  </node>
  <node id="152178" label="JDP2" cy:nodeId="105891">
    <graphics y="479.42205723695315" z="0.0" x="-766.8291254012684"/>
  </node>
  <node id="152225" label="MGAT5" cy:nodeId="105893">
    <graphics y="176.6905280011133" z="0.0" x="-376.3530359237293"/>
  </node>
  <node id="152381" label="FKRP" cy:nodeId="105896">
    <graphics y="508.896636094375" z="0.0" x="-674.7303400008777"/>
  </node>
  <node id="152195" label="GBGT1" cy:nodeId="105897">
    <graphics y="1202.2273550885157" z="0.0" x="-782.2336664168934"/>
  </node>
  <node id="152436" label="GNB1" cy:nodeId="105902">
    <graphics y="-193.32077113218747" z="0.0" x="-248.15666293788945"/>
  </node>
  <node id="152175" label="KDM1A" cy:nodeId="105901">
    <graphics y="-818.0158700091406" z="0.0" x="1141.5634527237316"/>
  </node>
  <node id="152169" label="KDM5A" cy:nodeId="105904">
    <graphics y="-19.911232863144505" z="0.0" x="-269.7713479964832"/>
  </node>
  <node id="152173" label="KDM3A" cy:nodeId="105903">
    <graphics y="138.87940892152346" z="0.0" x="-261.553643223534"/>
  </node>
  <node id="152345" label="HS2ST1" cy:nodeId="105906">
    <graphics y="-50.6905526263281" z="0.0" x="-4.976845738182419"/>
  </node>
  <node id="152310" label="GNS" cy:nodeId="105905">
    <graphics y="892.9977408307032" z="0.0" x="-474.55007266689336"/>
  </node>
  <node id="152050" label="B3GALNT2" cy:nodeId="105908">
    <graphics y="-423.9537057025" z="0.0" x="-677.8773126571277"/>
  </node>
  <node id="152156" label="LYL1" cy:nodeId="105911">
    <graphics y="-2412.594300184922" z="0.0" x="-644.3470697372059"/>
  </node>
  <node id="152154" label="MAFB" cy:nodeId="105914">
    <graphics y="1070.7456046002344" z="0.0" x="127.20978451084102"/>
  </node>
  <node id="152152" label="MAZ" cy:nodeId="105916">
    <graphics y="-1340.4365853411718" z="0.0" x="1050.4208745987316"/>
  </node>
  <node id="152252" label="MGAT4B" cy:nodeId="105918">
    <graphics y="885.3255606549219" z="0.0" x="15.264838221778518"/>
  </node>
  <node id="152284" label="IDS" cy:nodeId="105922">
    <graphics y="880.0940543072657" z="0.0" x="-228.21235751796758"/>
  </node>
  <node id="152453" label="ARID3A" cy:nodeId="107970">
    <graphics y="-204.84317103453122" z="0.0" x="226.53888607334102"/>
  </node>
  <node id="152146" label="MECP2" cy:nodeId="105921">
    <graphics y="566.0545035260157" z="0.0" x="-114.23868655849492"/>
  </node>
  <node id="152144" label="MED1" cy:nodeId="105924">
    <graphics y="348.1560965435938" z="0.0" x="-589.6220636336902"/>
  </node>
  <node id="152254" label="NDST1" cy:nodeId="105923">
    <graphics y="952.2960196392969" z="0.0" x="-303.8968896834949"/>
  </node>
  <node id="152140" label="MEF2C" cy:nodeId="105926">
    <graphics y="718.9760123150782" z="0.0" x="-82.10144138027226"/>
  </node>
  <node id="152286" label="GALNT11" cy:nodeId="107974">
    <graphics y="1012.9381094830469" z="0.0" x="27.61305904697383"/>
  </node>
  <node id="152141" label="MEF2A" cy:nodeId="105925">
    <graphics y="501.0668631451563" z="0.0" x="-313.4143915145496"/>
  </node>
  <node id="152428" label="AUTS2" cy:nodeId="107973">
    <graphics y="870.1715689557032" z="0.0" x="-617.028008457909"/>
  </node>
  <node id="152138" label="MEIS1" cy:nodeId="105928">
    <graphics y="957.2315054791407" z="0.0" x="-498.76137637783086"/>
  </node>
  <node id="152324" label="FUT8" cy:nodeId="107976">
    <graphics y="-273.7934273821875" z="0.0" x="123.52661800693477"/>
  </node>
  <node id="152371" label="BRD7" cy:nodeId="107977">
    <graphics y="-270.1407784564062" z="0.0" x="398.47336483310664"/>
  </node>
  <node id="152391" label="PIGX" cy:nodeId="107980">
    <graphics y="-941.6200570208593" z="0.0" x="696.7796392471691"/>
  </node>
  <node id="152132" label="MRE11A" cy:nodeId="105931">
    <graphics y="-421.9709176165625" z="0.0" x="-478.97292422939336"/>
  </node>
  <node id="152129" label="MYBL1" cy:nodeId="105934">
    <graphics y="-411.084320936875" z="0.0" x="35.75015926670039"/>
  </node>
  <node id="152211" label="LAMP1" cy:nodeId="107981">
    <graphics y="1885.7440787213282" z="0.0" x="-1447.5827875106434"/>
  </node>
  <node id="152339" label="CTSA" cy:nodeId="107984">
    <graphics y="1882.4456168072657" z="0.0" x="161.90015316318477"/>
  </node>
  <node id="152128" label="MYBL2" cy:nodeId="105935">
    <graphics y="-1236.5953988177343" z="0.0" x="1046.0097417862316"/>
  </node>
  <node id="152293" label="E2F4" cy:nodeId="107987">
    <graphics y="-837.0242318255468" z="0.0" x="1014.4399175674816"/>
  </node>
  <node id="152393" label="CHST9" cy:nodeId="105939">
    <graphics y="898.0701285260157" z="0.0" x="-719.6810541122059"/>
  </node>
  <node id="152126" label="MZF1" cy:nodeId="105942">
    <graphics y="1995.041655625625" z="0.0" x="-979.0037775008777"/>
  </node>
  <node id="152145" label="HAS3" cy:nodeId="105941">
    <graphics y="537.6891775982813" z="0.0" x="291.69394588779414"/>
  </node>
  <node id="152203" label="HEYL" cy:nodeId="107993">
    <graphics y="1240.5303336041407" z="0.0" x="-929.6900873153309"/>
  </node>
  <node id="152115" label="NPAT" cy:nodeId="105948">
    <graphics y="-270.8540047747656" z="0.0" x="-359.1445703475574"/>
  </node>
  <node id="152117" label="NIPBL" cy:nodeId="105947">
    <graphics y="-96.19375697203122" z="0.0" x="-293.5241785018543"/>
  </node>
  <node id="152373" label="SLC35D1" cy:nodeId="105950">
    <graphics y="171.19609745912112" z="0.0" x="-229.85086917568242"/>
  </node>
  <node id="152111" label="NR2C2" cy:nodeId="105949">
    <graphics y="257.2908926861719" z="0.0" x="-140.38444804836308"/>
  </node>
  <node id="152170" label="KDM4C" cy:nodeId="107997">
    <graphics y="-253.72580042906247" z="0.0" x="-75.55836581874883"/>
  </node>
  <node id="152399" label="GALNT3" cy:nodeId="108000">
    <graphics y="650.8329459088282" z="0.0" x="-214.320130345116"/>
  </node>
  <node id="152090" label="PIGM" cy:nodeId="105954">
    <graphics y="67.07359703950442" z="0.0" x="-478.2303094832996"/>
  </node>
  <node id="152219" label="NANS" cy:nodeId="108002">
    <graphics y="-1336.5208138567968" z="0.0" x="1315.2834234268566"/>
  </node>
  <node id="152108" label="PBX1" cy:nodeId="105953">
    <graphics y="747.3079825299219" z="0.0" x="-16.60001468349492"/>
  </node>
  <node id="152379" label="SLC35A1" cy:nodeId="108001">
    <graphics y="93.61460789613284" z="0.0" x="-409.8147363631824"/>
  </node>
  <node id="152028" label="B3GNT7" cy:nodeId="108004">
    <graphics y="1513.0912466900782" z="0.0" x="-481.128350254784"/>
  </node>
  <node id="152103" label="PHF20" cy:nodeId="105956">
    <graphics y="222.81089695863284" z="0.0" x="-440.27245425869023"/>
  </node>
  <node id="152105" label="PCGF1" cy:nodeId="105955">
    <graphics y="1995.041655625625" z="0.0" x="-779.4369516341785"/>
  </node>
  <node id="152450" label="GCNT3" cy:nodeId="108003">
    <graphics y="1325.8705435650782" z="0.0" x="322.6264104874035"/>
  </node>
  <node id="152100" label="PIAS1" cy:nodeId="105958">
    <graphics y="105.4204092877344" z="0.0" x="-52.711380955467575"/>
  </node>
  <node id="152153" label="MAFK" cy:nodeId="108006">
    <graphics y="-964.6250619036718" z="0.0" x="539.3588628799816"/>
  </node>
  <node id="152102" label="PHF6" cy:nodeId="105957">
    <graphics y="-821.7229622942968" z="0.0" x="29.493582728614456"/>
  </node>
  <node id="152378" label="SLC17A5" cy:nodeId="108005">
    <graphics y="467.6629629986719" z="0.0" x="-571.6170282332996"/>
  </node>
  <node id="152098" label="POLR3A" cy:nodeId="105960">
    <graphics y="157.75974949769534" z="0.0" x="-97.9732522933582"/>
  </node>
  <node id="152099" label="POLR2B" cy:nodeId="105959">
    <graphics y="37.442534531875026" z="0.0" x="-64.3993997542957"/>
  </node>
  <node id="152127" label="MYC" cy:nodeId="108009">
    <graphics y="-475.77435389585935" z="0.0" x="835.0531377823254"/>
  </node>
  <node id="152091" label="PRKDC" cy:nodeId="105963">
    <graphics y="28.301646317763698" z="0.0" x="-379.8711023299793"/>
  </node>
  <node id="152426" label="UGGT2" cy:nodeId="105966">
    <graphics y="826.1257925885157" z="0.0" x="-479.38613223720586"/>
  </node>
  <node id="152084" label="RB1" cy:nodeId="105965">
    <graphics y="55.0050040142969" z="0.0" x="-121.04250812221562"/>
  </node>
  <node id="152081" label="RBL2" cy:nodeId="105968">
    <graphics y="84.95174273423709" z="0.0" x="-297.1577997176746"/>
  </node>
  <node id="152083" label="RBBP5" cy:nodeId="105967">
    <graphics y="218.9391623394922" z="0.0" x="-162.6372213332752"/>
  </node>
  <node id="152078" label="REST" cy:nodeId="105970">
    <graphics y="275.2003928082422" z="0.0" x="-585.3270502059559"/>
  </node>
  <node id="152289" label="CHST14" cy:nodeId="108018">
    <graphics y="1116.4349966900782" z="0.0" x="-426.07701968837773"/>
  </node>
  <node id="152386" label="PIGV" cy:nodeId="111090">
    <graphics y="844.8150626080469" z="0.0" x="-167.0293807952503"/>
  </node>
  <node id="152080" label="RCOR1" cy:nodeId="105969">
    <graphics y="-151.12155238218747" z="0.0" x="-4.480309483299607"/>
  </node>
  <node id="152076" label="RFX5" cy:nodeId="105972">
    <graphics y="-205.82742396421872" z="0.0" x="138.36533260654414"/>
  </node>
  <node id="152077" label="RFX1" cy:nodeId="105971">
    <graphics y="502.6006155865625" z="0.0" x="-493.1155328719715"/>
  </node>
  <node id="152075" label="RFX7" cy:nodeId="105974">
    <graphics y="-505.51397791929685" z="0.0" x="-536.8293390243152"/>
  </node>
  <node id="152082" label="RBL1" cy:nodeId="108022">
    <graphics y="-115.6112069232031" z="0.0" x="135.9819707901379"/>
  </node>
  <node id="152349" label="CD59" cy:nodeId="111094">
    <graphics y="492.7871390240625" z="0.0" x="-1023.1277093856434"/>
  </node>
  <node id="152368" label="CAMTA2" cy:nodeId="111093">
    <graphics y="171.93982609681643" z="0.0" x="-629.313408848534"/>
  </node>
  <node id="152448" label="COG2" cy:nodeId="105973">
    <graphics y="-2153.691956434922" z="0.0" x="1117.7442388565441"/>
  </node>
  <node id="152251" label="FPGT" cy:nodeId="105976">
    <graphics y="511.5712576764063" z="0.0" x="25.56909847568477"/>
  </node>
  <node id="152073" label="RNF2" cy:nodeId="105975">
    <graphics y="422.9732352154688" z="0.0" x="-249.2521066634754"/>
  </node>
  <node id="152285" label="POMT2" cy:nodeId="108023">
    <graphics y="1111.9695425885157" z="0.0" x="-22.505562779198044"/>
  </node>
  <node id="152186" label="GLA" cy:nodeId="108026">
    <graphics y="-1858.8441781146093" z="0.0" x="1261.6155767471691"/>
  </node>
  <node id="152264" label="ETS2" cy:nodeId="111098">
    <graphics y="579.6748343365625" z="0.0" x="-753.9728631942371"/>
  </node>
  <node id="152071" label="RORA" cy:nodeId="105977">
    <graphics y="1235.2661734478907" z="0.0" x="-192.06560229946172"/>
  </node>
  <node id="152079" label="PIGA" cy:nodeId="108027">
    <graphics y="-28.2437752825781" z="0.0" x="199.07126522373164"/>
  </node>
  <node id="152164" label="SULF2" cy:nodeId="105979">
    <graphics y="1454.8604117291407" z="0.0" x="-98.3958368270496"/>
  </node>
  <node id="152033" label="TBP" cy:nodeId="108030">
    <graphics y="78.42277499608554" z="0.0" x="359.89731502841914"/>
  </node>
  <node id="152069" label="RUNX3" cy:nodeId="105982">
    <graphics y="-1870.0778206927343" z="0.0" x="-297.6739892928699"/>
  </node>
  <node id="152070" label="RUNX2" cy:nodeId="105981">
    <graphics y="840.7452383892969" z="0.0" x="-950.0591669051746"/>
  </node>
  <node id="152043" label="STAT5B" cy:nodeId="108029">
    <graphics y="-136.05069056578122" z="0.0" x="-175.78651618648564"/>
  </node>
  <node id="152212" label="HES1" cy:nodeId="111101">
    <graphics y="1766.8541861432032" z="0.0" x="-1350.3534173934559"/>
  </node>
  <node id="152063" label="SIN3A" cy:nodeId="105984">
    <graphics y="-105.57286158628904" z="0.0" x="-233.7648553817371"/>
  </node>
  <node id="152085" label="B3GNT9" cy:nodeId="108032">
    <graphics y="1396.6715689557032" z="0.0" x="-311.65781497646367"/>
  </node>
  <node id="152068" label="RXRA" cy:nodeId="105983">
    <graphics y="1106.0032339947657" z="0.0" x="-102.35331821132695"/>
  </node>
  <node id="152093" label="B3GALT5" cy:nodeId="108034">
    <graphics y="-2804.390931044297" z="0.0" x="1739.7129888565441"/>
  </node>
  <node id="152061" label="SIX5" cy:nodeId="105986">
    <graphics y="1076.4037466900782" z="0.0" x="-615.5918512313465"/>
  </node>
  <node id="152166" label="KLF10" cy:nodeId="111106">
    <graphics y="603.8343497174219" z="0.0" x="91.12030697177852"/>
  </node>
  <node id="152404" label="UGCG" cy:nodeId="105985">
    <graphics y="384.1076956646875" z="0.0" x="-214.00125598598515"/>
  </node>
  <node id="152019" label="TFDP1" cy:nodeId="108036">
    <graphics y="-312.3407906634375" z="0.0" x="-487.3625116317371"/>
  </node>
  <node id="152057" label="SMAD4" cy:nodeId="105987">
    <graphics y="425.7407523053125" z="0.0" x="-310.34142398525273"/>
  </node>
  <node id="152054" label="SMC3" cy:nodeId="105990">
    <graphics y="-101.41153040953122" z="0.0" x="-71.27736758876836"/>
  </node>
  <node id="152216" label="GMPPB" cy:nodeId="108038">
    <graphics y="-706.6977547747656" z="0.0" x="1319.0577154190441"/>
  </node>
  <node id="152055" label="SMC1A" cy:nodeId="105989">
    <graphics y="-214.74020472593747" z="0.0" x="13.229041102637893"/>
  </node>
  <node id="152092" label="PRAME" cy:nodeId="111111">
    <graphics y="811.4794913189844" z="0.0" x="-1289.1822748153309"/>
  </node>
  <node id="152034" label="TBL1XR1" cy:nodeId="111114">
    <graphics y="31.597270097060573" z="0.0" x="-304.11733340908086"/>
  </node>
  <node id="152046" label="SRCAP" cy:nodeId="105994">
    <graphics y="-217.57086268492185" z="0.0" x="-832.2625360457996"/>
  </node>
  <node id="152035" label="TBL1X" cy:nodeId="111113">
    <graphics y="360.11456211976565" z="0.0" x="89.81684017490352"/>
  </node>
  <node id="152006" label="TTF1" cy:nodeId="111116">
    <graphics y="-1062.9243783099218" z="0.0" x="625.3223638565441"/>
  </node>
  <node id="152137" label="B3GALNT1" cy:nodeId="111115">
    <graphics y="976.6083365338282" z="0.0" x="-597.6809015243152"/>
  </node>
  <node id="152438" label="GANAB" cy:nodeId="105998">
    <graphics y="362.2333975689844" z="0.0" x="-337.9717645614246"/>
  </node>
  <node id="152229" label="HPSE" cy:nodeId="106000">
    <graphics y="820.9174185650782" z="0.0" x="616.9300298721691"/>
  </node>
  <node id="152045" label="STAT1" cy:nodeId="105999">
    <graphics y="477.23284825257815" z="0.0" x="92.34372616123164"/>
  </node>
  <node id="152044" label="STAT2" cy:nodeId="106001">
    <graphics y="593.9923697369532" z="0.0" x="-318.4154138534168"/>
  </node>
  <node id="152040" label="SUMO2" cy:nodeId="106004">
    <graphics y="-134.34195033140622" z="0.0" x="1605.9736089737316"/>
  </node>
  <node id="152038" label="TAF1" cy:nodeId="106006">
    <graphics y="264.4272910016016" z="0.0" x="-89.46462344814336"/>
  </node>
  <node id="152253" label="COG1" cy:nodeId="106005">
    <graphics y="806.9870596783594" z="0.0" x="-28.502037998924607"/>
  </node>
  <node id="152030" label="TCF7" cy:nodeId="106008">
    <graphics y="-980.3456429583593" z="0.0" x="626.9787359268566"/>
  </node>
  <node id="152031" label="TCF12" cy:nodeId="106007">
    <graphics y="-332.1273507220312" z="0.0" x="185.33234310459102"/>
  </node>
  <node id="152027" label="TCF7L2" cy:nodeId="106010">
    <graphics y="845.0828848736719" z="0.0" x="-380.69269656826054"/>
  </node>
  <node id="152029" label="TCF7L1" cy:nodeId="106009">
    <graphics y="1181.6911002057032" z="0.0" x="-494.631524082909"/>
  </node>
  <node id="152199" label="ALG5" cy:nodeId="106012">
    <graphics y="-234.18487635679685" z="0.0" x="1473.0998296768566"/>
  </node>
  <node id="152072" label="GALNT1" cy:nodeId="106014">
    <graphics y="229.80352696351565" z="0.0" x="149.80023861240352"/>
  </node>
  <node id="152022" label="TET2" cy:nodeId="106016">
    <graphics y="478.8901053326563" z="0.0" x="-134.2717256515125"/>
  </node>
  <node id="152026" label="TERF1" cy:nodeId="106015">
    <graphics y="619.5650626080469" z="0.0" x="-416.95913028408086"/>
  </node>
  <node id="152008" label="TRIM28" cy:nodeId="106018">
    <graphics y="-1496.6781624896093" z="0.0" x="1043.1548833877941"/>
  </node>
  <node id="152011" label="TP63" cy:nodeId="106017">
    <graphics y="941.5687247174219" z="0.0" x="17.39180660556758"/>
  </node>
  <node id="152004" label="UBTF" cy:nodeId="106020">
    <graphics y="-1037.7697152239843" z="0.0" x="961.1983404190441"/>
  </node>
  <node id="152005" label="TTF2" cy:nodeId="106019">
    <graphics y="-286.1224679095312" z="0.0" x="59.07599544834102"/>
  </node>
  <node id="152002" label="USF2" cy:nodeId="106022">
    <graphics y="-1472.8914193255468" z="0.0" x="1329.0073003799816"/>
  </node>
  <node id="152003" label="USF1" cy:nodeId="106021">
    <graphics y="-1478.2177132708593" z="0.0" x="1466.5687017471691"/>
  </node>
  <node id="152000" label="WDR5" cy:nodeId="106024">
    <graphics y="-2481.693665419297" z="0.0" x="1489.1708745987316"/>
  </node>
  <node id="152001" label="VEZF1" cy:nodeId="106023">
    <graphics y="562.0547171490625" z="0.0" x="-414.2527704207996"/>
  </node>
  <node id="151998" label="XRN2" cy:nodeId="106025">
    <graphics y="130.51906117372073" z="0.0" x="-203.14581012416875"/>
  </node>
  <node id="151996" label="YY1" cy:nodeId="106028">
    <graphics y="-43.01250544615232" z="0.0" x="-136.3062486617664"/>
  </node>
  <node id="152281" label="B3GALT4" cy:nodeId="106030">
    <graphics y="-1456.7637337786718" z="0.0" x="1200.8005132706066"/>
  </node>
  <node id="151995" label="ZBTB17" cy:nodeId="106029">
    <graphics y="-1381.5449837786718" z="0.0" x="1223.5575933487316"/>
  </node>
  <node id="151997" label="C1GALT1C1" cy:nodeId="106032">
    <graphics y="-157.27833643980466" z="0.0" x="-359.744561192284"/>
  </node>
  <node id="151994" label="ZBTB33" cy:nodeId="106031">
    <graphics y="105.16844853333987" z="0.0" x="-101.81704806972539"/>
  </node>
  <node id="152348" label="CDK7" cy:nodeId="118328">
    <graphics y="2146.901488389297" z="0.0" x="-1320.723465916405"/>
  </node>
  <node id="152243" label="FOXQ1" cy:nodeId="118330">
    <graphics y="-3170.038636122422" z="0.0" x="2353.615332606544"/>
  </node>
  <node id="152263" label="ETV7" cy:nodeId="118329">
    <graphics y="-2942.633118544297" z="0.0" x="2153.130469325294"/>
  </node>
  <node id="152181" label="ISL1" cy:nodeId="118334">
    <graphics y="1015.3275748150782" z="0.0" x="524.5060186417004"/>
  </node>
  <node id="152196" label="HOXA4" cy:nodeId="118333">
    <graphics y="1114.4696646588282" z="0.0" x="-932.5257196395496"/>
  </node>
  <node id="152425" label="MANBA" cy:nodeId="118335">
    <graphics y="913.3749380963282" z="0.0" x="-362.64609622646367"/>
  </node>
  <node id="152244" label="FOXP1" cy:nodeId="113218">
    <graphics y="1325.6310416119532" z="0.0" x="-547.4742364852527"/>
  </node>
  <node id="152021" label="TFAP2A" cy:nodeId="118340">
    <graphics y="932.9898062603907" z="0.0" x="-419.1705408065418"/>
  </node>
  <node id="152261" label="HYAL3" cy:nodeId="113220">
    <graphics y="-3080.426819716172" z="0.0" x="2261.720801356544"/>
  </node>
  <node id="152315" label="CHST4" cy:nodeId="113221">
    <graphics y="1985.7440787213282" z="0.0" x="-1420.723465916405"/>
  </node>
  <node id="152191" label="ING5" cy:nodeId="113224">
    <graphics y="52.09793385438479" z="0.0" x="-656.4206476180652"/>
  </node>
  <node id="152130" label="MYB" cy:nodeId="113228">
    <graphics y="-831.5197152239843" z="0.0" x="696.9477911026379"/>
  </node>
  <node id="152210" label="HEXA" cy:nodeId="112216">
    <graphics y="1570.8695670025782" z="0.0" x="-1191.479210850487"/>
  </node>
  <node id="152208" label="HEXIM1" cy:nodeId="112221">
    <graphics y="923.3400259869532" z="0.0" x="-149.95160960842168"/>
  </node>
  <node id="152162" label="L3MBTL2" cy:nodeId="112224">
    <graphics y="-761.0017098528906" z="0.0" x="1505.0186529190441"/>
  </node>
  <node id="152260" label="UGT1A6" cy:nodeId="112226">
    <graphics y="-2911.383118544297" z="0.0" x="2268.948584559669"/>
  </node>
  <node id="152237" label="ST6GALNAC2" cy:nodeId="112225">
    <graphics y="807.6262198346094" z="0.0" x="165.73108578037227"/>
  </node>
  <node id="152109" label="PALB2" cy:nodeId="112228">
    <graphics y="278.59666356019534" z="0.0" x="-797.3150262801746"/>
  </node>
  <node id="152287" label="B4GALT4" cy:nodeId="112227">
    <graphics y="756.8916006939844" z="0.0" x="-474.08287906337773"/>
  </node>
  <node id="152231" label="ARSD" cy:nodeId="112230">
    <graphics y="874.6782828228907" z="0.0" x="499.87973690341914"/>
  </node>
  <node id="152088" label="RAG1" cy:nodeId="112229">
    <graphics y="-683.2495736224218" z="0.0" x="312.874335292091"/>
  </node>
  <node id="152041" label="SUMO1" cy:nodeId="112231">
    <graphics y="-323.5727547747656" z="0.0" x="1106.4041509659191"/>
  </node>
  <node id="152245" label="B4GALT1" cy:nodeId="107274">
    <graphics y="977.6541739361719" z="0.0" x="-79.26481723476445"/>
  </node>
  <node id="152449" label="ASH2L" cy:nodeId="107273">
    <graphics y="-2297.524964247422" z="0.0" x="1112.2876958877941"/>
  </node>
  <node id="152382" label="BRD2" cy:nodeId="107276">
    <graphics y="277.7077933209375" z="0.0" x="-429.35012149501836"/>
  </node>
  <node id="152412" label="BCL6" cy:nodeId="107275">
    <graphics y="-384.9947213275" z="0.0" x="-375.13781070400273"/>
  </node>
  <node id="152431" label="FUT10" cy:nodeId="107278">
    <graphics y="377.5034476178125" z="0.0" x="-293.3511819808582"/>
  </node>
  <node id="152375" label="BRD3" cy:nodeId="107277">
    <graphics y="39.14538868836917" z="0.0" x="-246.95883273769414"/>
  </node>
  <node id="152312" label="B4GALT5" cy:nodeId="107279">
    <graphics y="942.8822623150782" z="0.0" x="-214.73582935024297"/>
  </node>
  <node id="152299" label="DNMT3A" cy:nodeId="107282">
    <graphics y="-1017.3309945208593" z="0.0" x="841.5708990127941"/>
  </node>
  <node id="152277" label="SLC35B3" cy:nodeId="107281">
    <graphics y="66.53757103852786" z="0.0" x="110.53192806552852"/>
  </node>
  <node id="152352" label="ASAH1" cy:nodeId="107290">
    <graphics y="636.5775748150782" z="0.0" x="-262.4350671737293"/>
  </node>
  <node id="152271" label="ERCC3" cy:nodeId="107292">
    <graphics y="-314.48358241148435" z="0.0" x="-174.51971006084477"/>
  </node>
  <node id="152387" label="PAPSS1" cy:nodeId="107291">
    <graphics y="603.6471548932032" z="0.0" x="-370.29100894619023"/>
  </node>
  <node id="152255" label="FOXK1" cy:nodeId="107298">
    <graphics y="552.2172842877344" z="0.0" x="-172.28812884975468"/>
  </node>
  <node id="152363" label="GNE" cy:nodeId="107297">
    <graphics y="-187.46542445249997" z="0.0" x="-57.61412906337773"/>
  </node>
  <node id="152217" label="ALG11" cy:nodeId="107300">
    <graphics y="-554.4575203997656" z="0.0" x="1174.9311285049816"/>
  </node>
  <node id="152221" label="GTF3C2" cy:nodeId="107302">
    <graphics y="137.0792342083887" z="0.0" x="-482.09304141689336"/>
  </node>
  <node id="152230" label="GRHL2" cy:nodeId="107301">
    <graphics y="919.0512686627344" z="0.0" x="699.1020269424816"/>
  </node>
  <node id="152213" label="HDAC3" cy:nodeId="107304">
    <graphics y="-633.1923836810156" z="0.0" x="1491.1401128799816"/>
  </node>
  <node id="152215" label="HDAC1" cy:nodeId="107303">
    <graphics y="-601.4660042864843" z="0.0" x="660.5791387588879"/>
  </node>
  <node id="152290" label="GNPDA1" cy:nodeId="107305">
    <graphics y="1001.2143546002344" z="0.0" x="-729.3954706161121"/>
  </node>
  <node id="152424" label="EXT2" cy:nodeId="107307">
    <graphics y="785.2272330182032" z="0.0" x="-543.7783136336902"/>
  </node>
  <node id="152183" label="NAAA" cy:nodeId="107310">
    <graphics y="-1738.9458626849218" z="0.0" x="0.7960882217785183"/>
  </node>
  <node id="152176" label="KAT2B" cy:nodeId="107312">
    <graphics y="170.4294424908594" z="0.0" x="-176.00637721706426"/>
  </node>
  <node id="152180" label="JARID2" cy:nodeId="107311">
    <graphics y="-535.7879037005468" z="0.0" x="452.8021612198254"/>
  </node>
  <node id="152168" label="KDM5C" cy:nodeId="107314">
    <graphics y="-17.834862623886693" z="0.0" x="-178.02370929409062"/>
  </node>
  <node id="152174" label="KDM2B" cy:nodeId="107313">
    <graphics y="-476.5042733294531" z="0.0" x="274.765692713966"/>
  </node>
  <node id="152167" label="KDM6B" cy:nodeId="107315">
    <graphics y="-376.2101143939062" z="0.0" x="303.44177913974727"/>
  </node>
  <node id="152163" label="KLF5" cy:nodeId="107318">
    <graphics y="707.5914908307032" z="0.0" x="275.24472713779414"/>
  </node>
  <node id="152160" label="LDB1" cy:nodeId="107320">
    <graphics y="137.84661015443362" z="0.0" x="196.4444952042004"/>
  </node>
  <node id="152207" label="ABO" cy:nodeId="107319">
    <graphics y="1213.2638541119532" z="0.0" x="-286.049622532616"/>
  </node>
  <node id="152158" label="LIN9" cy:nodeId="107321">
    <graphics y="-191.1649178607031" z="0.0" x="348.8368291885754"/>
  </node>
  <node id="152143" label="MED12" cy:nodeId="107324">
    <graphics y="-213.84417811460935" z="0.0" x="-135.51744556118047"/>
  </node>
  <node id="152151" label="MBD3" cy:nodeId="107323">
    <graphics y="-1766.7734994036718" z="0.0" x="1511.8322515518566"/>
  </node>
  <node id="152122" label="NCOR2" cy:nodeId="107326">
    <graphics y="373.3341971295313" z="0.0" x="-793.4456415145496"/>
  </node>
  <node id="152139" label="MEF2D" cy:nodeId="107325">
    <graphics y="-802.1260995013281" z="0.0" x="-181.29322528530156"/>
  </node>
  <node id="152427" label="POFUT2" cy:nodeId="107327">
    <graphics y="676.1286002057032" z="0.0" x="-511.547539707909"/>
  </node>
  <node id="152118" label="NFYB" cy:nodeId="107330">
    <graphics y="-48.9456795794531" z="0.0" x="338.7199163467785"/>
  </node>
  <node id="152119" label="NFYA" cy:nodeId="107329">
    <graphics y="-275.6210946185156" z="0.0" x="3.7145757706066433"/>
  </node>
  <node id="152179" label="B4GALT6" cy:nodeId="107331">
    <graphics y="-468.34869471617185" z="0.0" x="78.11141109775508"/>
  </node>
  <node id="152101" label="PHF8" cy:nodeId="107334">
    <graphics y="202.48541935853518" z="0.0" x="-280.90786075283086"/>
  </node>
  <node id="152110" label="NRF1" cy:nodeId="107333">
    <graphics y="-701.7589120013281" z="0.0" x="650.5588750870129"/>
  </node>
  <node id="152222" label="SLC35A2" cy:nodeId="107335">
    <graphics y="-169.35813990660154" z="0.0" x="-1608.5005121200184"/>
  </node>
  <node id="152067" label="RYBP" cy:nodeId="107338">
    <graphics y="339.7208243267969" z="0.0" x="-175.80046558071172"/>
  </node>
  <node id="152074" label="RLF" cy:nodeId="107337">
    <graphics y="-362.5583199603125" z="0.0" x="-573.8475275008777"/>
  </node>
  <node id="152064" label="SETDB1" cy:nodeId="107339">
    <graphics y="-122.24769679136716" z="0.0" x="230.42578792880977"/>
  </node>
  <node id="152058" label="SMAD3" cy:nodeId="107342">
    <graphics y="685.4254141705469" z="0.0" x="-368.14301395107304"/>
  </node>
  <node id="152060" label="SMAD1" cy:nodeId="107341">
    <graphics y="346.8574210064844" z="0.0" x="-383.03464603115117"/>
  </node>
  <node id="152056" label="SMARCA4" cy:nodeId="107343">
    <graphics y="-841.1299447161718" z="0.0" x="614.9064092667004"/>
  </node>
  <node id="152048" label="SP2" cy:nodeId="107346">
    <graphics y="177.76771458558596" z="0.0" x="-322.7000818221668"/>
  </node>
  <node id="152042" label="STAT6" cy:nodeId="107348">
    <graphics y="730.4508658307032" z="0.0" x="-331.6149988143543"/>
  </node>
  <node id="152039" label="SVIL" cy:nodeId="107349">
    <graphics y="424.80328282289065" z="0.0" x="157.24011898349727"/>
  </node>
  <node id="152037" label="TAF3" cy:nodeId="107351">
    <graphics y="167.7779532330469" z="0.0" x="-750.5448846786121"/>
  </node>
  <node id="152023" label="TERF2" cy:nodeId="107353">
    <graphics y="-401.71612635679685" z="0.0" x="-119.82975101161992"/>
  </node>
  <node id="152020" label="TFCP2" cy:nodeId="107355">
    <graphics y="402.7987967389063" z="0.0" x="-531.5115900008777"/>
  </node>
  <node id="152086" label="SLC35D2" cy:nodeId="116605">
    <graphics y="1281.2103873150782" z="0.0" x="-453.24169253994023"/>
  </node>
  <node id="152297" label="DYRK1A" cy:nodeId="120755">
    <graphics y="-178.99563685484372" z="0.0" x="-654.247735020409"/>
  </node>
  <node id="152235" label="GMEB1" cy:nodeId="120757">
    <graphics y="-71.31118861265622" z="0.0" x="439.91208553623164"/>
  </node>
  <node id="152301" label="DLX4" cy:nodeId="123850">
    <graphics y="639.1165152447657" z="0.0" x="-855.7640619247059"/>
  </node>
</graph>
