# Supplementary material for: A systems-based framework to computationally describe putative transcription factors and signaling pathways regulating glycan biosynthesis
Source: publisher site journal article supplement (doi:10.3762/bjoc.17.119), 2021-07-22
Supplement: Additional file 2 [file 1860-5397-17-119-S2.cys › CytoscapeSession-2021_03_21-12_01/views/127699-133755-UCEC.xgmml]

<?xml version="1.0" encoding="UTF-8" standalone="yes"?>
<graph id="133755" label="UCEC" cy:view="1" cy:networkId="127699" cy:visualStyle="default" cy:rendererId="org.cytoscape.ding" cy:documentVersion="3.0" xmlns:dc="http://purl.org/dc/elements/1.1/" xmlns:xlink="http://www.w3.org/1999/xlink" xmlns:rdf="http://www.w3.org/1999/02/22-rdf-syntax-ns#" xmlns:cy="http://www.cytoscape.org" xmlns="http://www.cs.rpi.edu/XGMML">
  <graphics>
    <att name="NETWORK_NODE_SELECTION" value="true" type="string" cy:type="String"/>
    <att name="NETWORK_CENTER_X_LOCATION" value="37.3372802734375" type="string" cy:type="String"/>
    <att name="NETWORK_HEIGHT" value="510.0" type="string" cy:type="String"/>
    <att name="NETWORK_TITLE" value="UCEC" type="string" cy:type="String"/>
    <att name="NETWORK_EDGE_SELECTION" value="true" type="string" cy:type="String"/>
    <att name="NETWORK_CENTER_Y_LOCATION" value="-522.03466796875" type="string" cy:type="String"/>
    <att name="NETWORK_WIDTH" value="1312.0" type="string" cy:type="String"/>
    <att name="NETWORK_DEPTH" value="0.0" type="string" cy:type="String"/>
    <att name="NETWORK_SCALE_FACTOR" value="0.1338819632909374" type="string" cy:type="String"/>
    <att name="NETWORK_ANNOTATION_SELECTION" value="false" type="string" cy:type="String"/>
    <att name="NETWORK_CENTER_Z_LOCATION" value="0.0" type="string" cy:type="String"/>
  </graphics>
  <node id="133805" label="RBBP5" cy:nodeId="105967">
    <graphics y="139.27683750236474" z="0.0" x="179.5032262316456"/>
  </node>
  <node id="133900" label="B4GALNT3" cy:nodeId="108015">
    <graphics y="-1358.7288692847446" z="0.0" x="-538.9228296765575"/>
  </node>
  <node id="133803" label="REST" cy:nodeId="105970">
    <graphics y="670.5963260277554" z="0.0" x="-103.32309823124501"/>
  </node>
  <node id="133804" label="RCOR1" cy:nodeId="105969">
    <graphics y="225.31342807853662" z="0.0" x="46.26750845820811"/>
  </node>
  <node id="133875" label="PIGB" cy:nodeId="108020">
    <graphics y="902.1822635277554" z="0.0" x="-622.9792109021434"/>
  </node>
  <node id="133802" label="RFX1" cy:nodeId="105971">
    <graphics y="-212.71957668220557" z="0.0" x="788.1742772570362"/>
  </node>
  <node id="133799" label="RFX7" cy:nodeId="105974">
    <graphics y="-385.39928707038916" z="0.0" x="461.4931859484425"/>
  </node>
  <node id="133929" label="CD59" cy:nodeId="111094">
    <graphics y="-2371.104235495682" z="0.0" x="-1102.4447412976513"/>
  </node>
  <node id="133762" label="COG2" cy:nodeId="105973">
    <graphics y="-710.9739254370884" z="0.0" x="51.587958287309675"/>
  </node>
  <node id="133808" label="PRDM4" cy:nodeId="108021">
    <graphics y="-512.5075863257603" z="0.0" x="581.9182652941456"/>
  </node>
  <node id="133854" label="FPGT" cy:nodeId="105976">
    <graphics y="-11.445696677322758" z="0.0" x="-278.0354700574169"/>
  </node>
  <node id="133895" label="CTBP2" cy:nodeId="111096">
    <graphics y="-369.5451992407993" z="0.0" x="350.06309409053233"/>
  </node>
  <node id="133798" label="RNF2" cy:nodeId="105975">
    <graphics y="158.52732578361474" z="0.0" x="45.37161917598155"/>
  </node>
  <node id="133796" label="SIN3A" cy:nodeId="105984">
    <graphics y="-226.01718410408057" z="0.0" x="89.23123831660655"/>
  </node>
  <node id="133939" label="UGCG" cy:nodeId="105985">
    <graphics y="154.4510928734585" z="0.0" x="244.0209493151417"/>
  </node>
  <node id="133768" label="TFDP1" cy:nodeId="108036">
    <graphics y="-36.24441799079932" z="0.0" x="-369.25187020390126"/>
  </node>
  <node id="133968" label="ARNT2" cy:nodeId="108548">
    <graphics y="-439.12033351814307" z="0.0" x="728.6951817980519"/>
  </node>
  <node id="133789" label="SMC3" cy:nodeId="105990">
    <graphics y="102.00462070548974" z="0.0" x="61.13272757441905"/>
  </node>
  <node id="133791" label="SMC1A" cy:nodeId="105989">
    <graphics y="264.7827884300991" z="0.0" x="104.83551688105968"/>
  </node>
  <node id="133785" label="SPDEF" cy:nodeId="105993">
    <graphics y="-2067.582751120682" z="0.0" x="-756.8930445203075"/>
  </node>
  <node id="133918" label="GANAB" cy:nodeId="105998">
    <graphics y="72.00779453361474" z="0.0" x="-228.76368050663564"/>
  </node>
  <node id="133780" label="TAF1" cy:nodeId="106006">
    <graphics y="141.02082553947412" z="0.0" x="126.16422171504405"/>
  </node>
  <node id="133896" label="CSNK2A1" cy:nodeId="108568">
    <graphics y="250.35401645744287" z="0.0" x="-238.57914071171376"/>
  </node>
  <node id="133778" label="TCF12" cy:nodeId="106007">
    <graphics y="-112.61923488533057" z="0.0" x="210.1791047564259"/>
  </node>
  <node id="133809" label="ALG5" cy:nodeId="106012">
    <graphics y="902.1822635277554" z="0.0" x="-223.845559168745"/>
  </node>
  <node id="133889" label="DR1" cy:nodeId="108571">
    <graphics y="712.4800540550991" z="0.0" x="18.256888341020613"/>
  </node>
  <node id="133855" label="GALNT1" cy:nodeId="106014">
    <graphics y="22.835766945724117" z="0.0" x="-161.90097909062"/>
  </node>
  <node id="133776" label="TEAD1" cy:nodeId="106013">
    <graphics y="508.4491702660366" z="0.0" x="95.66365713984874"/>
  </node>
  <node id="133772" label="TET2" cy:nodeId="106016">
    <graphics y="-79.88713344490088" z="0.0" x="151.67520804316905"/>
  </node>
  <node id="133774" label="TERF1" cy:nodeId="106015">
    <graphics y="227.3822452172085" z="0.0" x="-339.2438745984325"/>
  </node>
  <node id="133888" label="E2F8" cy:nodeId="108575">
    <graphics y="-337.5671871558384" z="0.0" x="-336.0375757703075"/>
  </node>
  <node id="133764" label="TTF2" cy:nodeId="106019">
    <graphics y="435.03065219963037" z="0.0" x="488.5790318957081"/>
  </node>
  <node id="133763" label="VEZF1" cy:nodeId="106023">
    <graphics y="-454.02948268806495" z="0.0" x="118.19755453975108"/>
  </node>
  <node id="133760" label="YAP1" cy:nodeId="106026">
    <graphics y="-112.42290004646338" z="0.0" x="15.571722935747175"/>
  </node>
  <node id="133761" label="XRN2" cy:nodeId="106025">
    <graphics y="150.22382846916162" z="0.0" x="452.7395085802784"/>
  </node>
  <node id="133759" label="YY1" cy:nodeId="106028">
    <graphics y="317.5121585472866" z="0.0" x="-180.21024422733876"/>
  </node>
  <node id="133971" label="GAL3ST3" cy:nodeId="108590">
    <graphics y="911.4798404320522" z="0.0" x="75.28809256465343"/>
  </node>
  <node id="133851" label="C1GALT1C1" cy:nodeId="106032">
    <graphics y="-134.12176784431495" z="0.0" x="-440.150734949995"/>
  </node>
  <node id="133757" label="ZBTB33" cy:nodeId="106031">
    <graphics y="-106.12033351814307" z="0.0" x="297.8046330919972"/>
  </node>
  <node id="133839" label="KLF15" cy:nodeId="108597">
    <graphics y="902.1822635277554" z="0.0" x="-423.41238503544423"/>
  </node>
  <node id="133830" label="MBD4" cy:nodeId="108599">
    <graphics y="29.654553566817867" z="0.0" x="-787.1254053601513"/>
  </node>
  <node id="133972" label="ALKBH3" cy:nodeId="113210">
    <graphics y="902.1822635277554" z="0.0" x="-24.278733302045794"/>
  </node>
  <node id="133800" label="CHST5" cy:nodeId="108612">
    <graphics y="1327.0349361046597" z="0.0" x="-603.7442636975536"/>
  </node>
  <node id="133801" label="RFX2" cy:nodeId="108611">
    <graphics y="1317.7373592003628" z="0.0" x="-703.3110895642528"/>
  </node>
  <node id="133836" label="LEO1" cy:nodeId="113227">
    <graphics y="-709.7051571265415" z="0.0" x="-930.5410547742138"/>
  </node>
  <node id="133779" label="TAF7" cy:nodeId="108623">
    <graphics y="760.7570926293179" z="0.0" x="167.3382558336964"/>
  </node>
  <node id="133770" label="TFAM" cy:nodeId="113234">
    <graphics y="-725.3556087866978" z="0.0" x="-475.7372828015575"/>
  </node>
  <node id="133767" label="THAP1" cy:nodeId="108626">
    <graphics y="597.5915652855679" z="0.0" x="-5.272774744916887"/>
  </node>
  <node id="133765" label="TRRAP" cy:nodeId="108628">
    <graphics y="641.8400394066616" z="0.0" x="117.3172368517628"/>
  </node>
  <node id="133892" label="DDX5" cy:nodeId="112218">
    <graphics y="168.965619240646" z="0.0" x="590.0822057238331"/>
  </node>
  <node id="133874" label="GLIS3" cy:nodeId="112220">
    <graphics y="-947.5612667456821" z="0.0" x="1040.3401097765675"/>
  </node>
  <node id="133883" label="ESR1" cy:nodeId="112219">
    <graphics y="-2103.588122214432" z="0.0" x="-977.0430078992138"/>
  </node>
  <node id="133822" label="NCAPG2" cy:nodeId="117858">
    <graphics y="-102.96866115486182" z="0.0" x="844.40322012813"/>
  </node>
  <node id="133928" label="ST6GALNAC2" cy:nodeId="112225">
    <graphics y="-2259.6019161597446" z="0.0" x="-1043.4051905164013"/>
  </node>
  <node id="133816" label="PALB2" cy:nodeId="112228">
    <graphics y="-482.1133297339634" z="0.0" x="286.59990210444835"/>
  </node>
  <node id="133852" label="C1GALT1" cy:nodeId="109670">
    <graphics y="-24.21518215095557" z="0.0" x="-574.7220850476513"/>
  </node>
  <node id="133775" label="TEAD2" cy:nodeId="109690">
    <graphics y="-231.87060054695166" z="0.0" x="-558.5541162976513"/>
  </node>
  <node id="133782" label="PIGG" cy:nodeId="109689">
    <graphics y="-339.41964229499854" z="0.0" x="1120.4792699328175"/>
  </node>
  <node id="133897" label="CREM" cy:nodeId="126103">
    <graphics y="284.74793735588037" z="0.0" x="1061.2809667101612"/>
  </node>
  <node id="133837" label="LARP7" cy:nodeId="110798">
    <graphics y="-189.0910900489048" z="0.0" x="-920.6735010632763"/>
  </node>
  <node id="133826" label="MNT" cy:nodeId="110801">
    <graphics y="-707.2877376929478" z="0.0" x="-358.151711512495"/>
  </node>
  <node id="133871" label="GALK2" cy:nodeId="110806">
    <graphics y="-727.8993099585728" z="0.0" x="828.7185277453175"/>
  </node>
  <node id="133954" label="FUT7" cy:nodeId="105685">
    <graphics y="1098.3776370629116" z="0.0" x="-988.6027765759716"/>
  </node>
  <node id="133964" label="STT3B" cy:nodeId="105688">
    <graphics y="77.94996372306787" z="0.0" x="171.88324637324718"/>
  </node>
  <node id="133922" label="MAN1A2" cy:nodeId="105687">
    <graphics y="16.165723000411617" z="0.0" x="269.64739890010264"/>
  </node>
  <node id="133807" label="PSIP1" cy:nodeId="110810">
    <graphics y="585.9065677269741" z="0.0" x="462.2639836779347"/>
  </node>
  <node id="133941" label="FUT11" cy:nodeId="105690">
    <graphics y="325.3198978050991" z="0.0" x="82.51192374141124"/>
  </node>
  <node id="133923" label="NEU3" cy:nodeId="105689">
    <graphics y="-41.88791164314307" z="0.0" x="241.66811652095225"/>
  </node>
  <node id="133788" label="SND1" cy:nodeId="110812">
    <graphics y="-861.1409786597446" z="0.0" x="881.1608495226612"/>
  </node>
  <node id="133921" label="COG5" cy:nodeId="105692">
    <graphics y="5.082165871505367" z="0.0" x="148.36492819697764"/>
  </node>
  <node id="133926" label="ACER2" cy:nodeId="105691">
    <graphics y="-515.9636562720493" z="0.0" x="418.65306754023936"/>
  </node>
  <node id="133940" label="MAN2A1" cy:nodeId="105694">
    <graphics y="37.91462436759912" z="0.0" x="197.57473654658702"/>
  </node>
  <node id="133786" label="SP4" cy:nodeId="110813">
    <graphics y="165.38581577384912" z="0.0" x="-576.1570215710888"/>
  </node>
  <node id="133915" label="SLC35F5" cy:nodeId="105696">
    <graphics y="370.5924808129116" z="0.0" x="-252.59952645390126"/>
  </node>
  <node id="133766" label="TOP2B" cy:nodeId="110815">
    <graphics y="264.14747348869287" z="0.0" x="771.334128331255"/>
  </node>
  <node id="133866" label="SLC35A3" cy:nodeId="105695">
    <graphics y="-516.6800716773228" z="0.0" x="-153.59952645390126"/>
  </node>
  <node id="133944" label="RTF1" cy:nodeId="105700">
    <graphics y="-173.56666835701026" z="0.0" x="-133.3140345105419"/>
  </node>
  <node id="133970" label="ARID2" cy:nodeId="105699">
    <graphics y="-430.82029994880713" z="0.0" x="-68.95871834843251"/>
  </node>
  <node id="133966" label="SLC35A5" cy:nodeId="105702">
    <graphics y="-168.40873226081885" z="0.0" x="259.3758306017628"/>
  </node>
  <node id="133965" label="ATF1" cy:nodeId="105701">
    <graphics y="425.4801761254116" z="0.0" x="3.0437230578174876"/>
  </node>
  <node id="133901" label="GALNT4" cy:nodeId="105703">
    <graphics y="-1937.9665401831821" z="0.0" x="-817.0079737195263"/>
  </node>
  <node id="133920" label="UGGT1" cy:nodeId="105705">
    <graphics y="288.02125278556787" z="0.0" x="252.17403883845714"/>
  </node>
  <node id="133962" label="ATF7IP" cy:nodeId="105710">
    <graphics y="7.072217141036617" z="0.0" x="962.0659398546925"/>
  </node>
  <node id="133960" label="ATRX" cy:nodeId="105712">
    <graphics y="-49.58497890388526" z="0.0" x="409.3306188097706"/>
  </node>
  <node id="133961" label="ALG10" cy:nodeId="105711">
    <graphics y="7.552350197677242" z="0.0" x="671.7045506945362"/>
  </node>
  <node id="133959" label="FKTN" cy:nodeId="105713">
    <graphics y="-100.99713405525245" z="0.0" x="84.86554617793468"/>
  </node>
  <node id="133957" label="CSGALNACT2" cy:nodeId="105715">
    <graphics y="190.536420021896" z="0.0" x="300.9857472887745"/>
  </node>
  <node id="133910" label="CHSY1" cy:nodeId="105717">
    <graphics y="263.40565219963037" z="0.0" x="340.82730765254405"/>
  </node>
  <node id="133794" label="DPM3" cy:nodeId="105722">
    <graphics y="902.1822635277554" z="0.0" x="-722.9792109021434"/>
  </node>
  <node id="133865" label="GRHL3" cy:nodeId="114938">
    <graphics y="368.4109622582241" z="0.0" x="243.84115595729259"/>
  </node>
  <node id="133955" label="BATF" cy:nodeId="105721">
    <graphics y="1192.736371193771" z="0.0" x="-933.8501520642528"/>
  </node>
  <node id="133953" label="BMI1" cy:nodeId="105726">
    <graphics y="375.2490970238491" z="0.0" x="574.2397679796925"/>
  </node>
  <node id="133951" label="BRCA1" cy:nodeId="105728">
    <graphics y="-613.3176754370884" z="0.0" x="-574.1880274304638"/>
  </node>
  <node id="133967" label="ALG10B" cy:nodeId="105727">
    <graphics y="-566.1885555640415" z="0.0" x="990.0708226671925"/>
  </node>
  <node id="133912" label="PIGN" cy:nodeId="105730">
    <graphics y="86.82951084220849" z="0.0" x="-23.046196986127825"/>
  </node>
  <node id="133950" label="PIGW" cy:nodeId="105729">
    <graphics y="-561.3494747534946" z="0.0" x="-691.066262293745"/>
  </node>
  <node id="133810" label="POLR3GL" cy:nodeId="114948">
    <graphics y="911.4798404320522" z="0.0" x="-124.2787333020458"/>
  </node>
  <node id="133835" label="SLC35E3" cy:nodeId="105732">
    <graphics y="-790.7692745581821" z="0.0" x="-1061.1428614148388"/>
  </node>
  <node id="133952" label="FAM20B" cy:nodeId="105731">
    <graphics y="255.16682163322412" z="0.0" x="513.7891454210987"/>
  </node>
  <node id="133948" label="BRD1" cy:nodeId="105733">
    <graphics y="-362.6990536109165" z="0.0" x="238.18183321864512"/>
  </node>
  <node id="133872" label="B4GALT1" cy:nodeId="107274">
    <graphics y="-989.8071773902134" z="0.0" x="1177.119284581255"/>
  </node>
  <node id="133933" label="CASP8AP2" cy:nodeId="105738">
    <graphics y="-153.38492092048682" z="0.0" x="645.4055394640675"/>
  </node>
  <node id="133945" label="BRD2" cy:nodeId="107276">
    <graphics y="-187.74122127449073" z="0.0" x="15.418951939653425"/>
  </node>
  <node id="133932" label="CBFB" cy:nodeId="105739">
    <graphics y="-510.858355368729" z="0.0" x="9.839682530473738"/>
  </node>
  <node id="133930" label="CMAS" cy:nodeId="105742">
    <graphics y="653.2688113793179" z="0.0" x="-421.2707300671825"/>
  </node>
  <node id="133938" label="FUT10" cy:nodeId="107278">
    <graphics y="406.36671176994287" z="0.0" x="116.00637717158702"/>
  </node>
  <node id="133931" label="CBX3" cy:nodeId="105741">
    <graphics y="802.1822635277554" z="0.0" x="-537.9393702039013"/>
  </node>
  <node id="133942" label="BRD3" cy:nodeId="107277">
    <graphics y="210.79127231681787" z="0.0" x="157.22723288447764"/>
  </node>
  <node id="133906" label="B4GALT5" cy:nodeId="107279">
    <graphics y="254.25178257072412" z="0.0" x="-102.10035042851064"/>
  </node>
  <node id="133856" label="ASAH1" cy:nodeId="107290">
    <graphics y="-260.09908207809485" z="0.0" x="-408.111672449995"/>
  </node>
  <node id="133886" label="ERCC3" cy:nodeId="107292">
    <graphics y="-283.9300335303501" z="0.0" x="302.07591147334483"/>
  </node>
  <node id="133924" label="CDK8" cy:nodeId="105756">
    <graphics y="72.03931919181787" z="0.0" x="124.5617436877003"/>
  </node>
  <node id="133831" label="DPM2" cy:nodeId="105758">
    <graphics y="1115.0170413597866" z="0.0" x="-797.7563410290966"/>
  </node>
  <node id="133771" label="TET3" cy:nodeId="118045">
    <graphics y="436.7020999535366" z="0.0" x="344.9239797106495"/>
  </node>
  <node id="133882" label="GCNT2" cy:nodeId="107296">
    <graphics y="-2094.755358542557" z="0.0" x="-1095.4039698132763"/>
  </node>
  <node id="133818" label="ALG11" cy:nodeId="107300">
    <graphics y="368.88428989494287" z="0.0" x="-404.0754175671825"/>
  </node>
  <node id="133833" label="MFNG" cy:nodeId="105766">
    <graphics y="902.1822635277554" z="0.0" x="-1102.4447412976513"/>
  </node>
  <node id="133867" label="GRHL2" cy:nodeId="107301">
    <graphics y="-997.6004513159946" z="0.0" x="-363.239602137495"/>
  </node>
  <node id="133911" label="CHD2" cy:nodeId="105770">
    <graphics y="-49.30095180427588" z="0.0" x="323.13948721797374"/>
  </node>
  <node id="133917" label="CHD1" cy:nodeId="105769">
    <graphics y="-33.74563869392432" z="0.0" x="179.91123480708507"/>
  </node>
  <node id="133848" label="HOXA6" cy:nodeId="107308">
    <graphics y="557.5944949730679" z="0.0" x="-125.11301522343251"/>
  </node>
  <node id="133947" label="NDST2" cy:nodeId="105772">
    <graphics y="-639.5998714820103" z="0.0" x="349.13641257197764"/>
  </node>
  <node id="133916" label="OGT" cy:nodeId="105771">
    <graphics y="-203.69475444709815" z="0.0" x="409.7471684923878"/>
  </node>
  <node id="133907" label="CHD8" cy:nodeId="105774">
    <graphics y="166.3177920922085" z="0.0" x="-16.645302821088762"/>
  </node>
  <node id="133909" label="CHD4" cy:nodeId="105773">
    <graphics y="120.76606479728662" z="0.0" x="718.6489171496144"/>
  </node>
  <node id="133847" label="JARID2" cy:nodeId="107311">
    <graphics y="227.17896762931787" z="0.0" x="429.24185843379405"/>
  </node>
  <node id="133840" label="KDM6B" cy:nodeId="107315">
    <graphics y="-311.3913486853794" z="0.0" x="407.9136723986378"/>
  </node>
  <node id="133904" label="CREB3" cy:nodeId="105786">
    <graphics y="1317.7373592003628" z="0.0" x="-902.877915430952"/>
  </node>
  <node id="133905" label="CREB1" cy:nodeId="105785">
    <graphics y="95.01292148673974" z="0.0" x="-488.3290796765575"/>
  </node>
  <node id="133827" label="MED12" cy:nodeId="107324">
    <graphics y="21.421948586349117" z="0.0" x="435.28780264766124"/>
  </node>
  <node id="133902" label="CREB3L4" cy:nodeId="105788">
    <graphics y="-1664.6177853003696" z="0.0" x="-693.56504159062"/>
  </node>
  <node id="133832" label="MBD3" cy:nodeId="107323">
    <graphics y="1217.7373592003628" z="0.0" x="-833.8501520642528"/>
  </node>
  <node id="133903" label="GMPPA" cy:nodeId="105787">
    <graphics y="1327.0349361046597" z="0.0" x="-803.3110895642528"/>
  </node>
  <node id="133898" label="CREBBP" cy:nodeId="105790">
    <graphics y="146.87257114494287" z="0.0" x="356.7010259142628"/>
  </node>
  <node id="133814" label="POFUT1" cy:nodeId="105792">
    <graphics y="586.1867190941616" z="0.0" x="625.1343602648487"/>
  </node>
  <node id="133784" label="COG7" cy:nodeId="105791">
    <graphics y="-2179.5955685034946" z="0.0" x="-708.795266199995"/>
  </node>
  <node id="133838" label="POFUT2" cy:nodeId="107327">
    <graphics y="911.4798404320522" z="0.0" x="-323.845559168745"/>
  </node>
  <node id="133894" label="CTNNB1" cy:nodeId="105794">
    <graphics y="218.22742954338037" z="0.0" x="214.54370398433116"/>
  </node>
  <node id="133820" label="NFYA" cy:nodeId="107329">
    <graphics y="177.27198520744287" z="0.0" x="-135.4223108777294"/>
  </node>
  <node id="133890" label="DEK" cy:nodeId="105795">
    <graphics y="79.58009067619287" z="0.0" x="607.4588231554737"/>
  </node>
  <node id="133908" label="DPM1" cy:nodeId="105799">
    <graphics y="205.962689553146" z="0.0" x="858.9272679796925"/>
  </node>
  <node id="133797" label="RYBP" cy:nodeId="107338">
    <graphics y="88.12849155509912" z="0.0" x="399.5253972521534"/>
  </node>
  <node id="133793" label="SMAD1" cy:nodeId="107341">
    <graphics y="10.519238625411617" z="0.0" x="-70.03644661991689"/>
  </node>
  <node id="133792" label="SMARCC1" cy:nodeId="107344">
    <graphics y="25.590314064864742" z="0.0" x="-12.2522211560497"/>
  </node>
  <node id="133787" label="SP2" cy:nodeId="107346">
    <graphics y="-122.58641323005713" z="0.0" x="374.0473393908253"/>
  </node>
  <node id="133783" label="STAT3" cy:nodeId="107347">
    <graphics y="-318.12277492439307" z="0.0" x="935.2367772570362"/>
  </node>
  <node id="133879" label="PIGK" cy:nodeId="106835">
    <graphics y="118.30518833244287" z="0.0" x="-109.02011971562001"/>
  </node>
  <node id="133913" label="B3GNT2" cy:nodeId="106838">
    <graphics y="-214.48636135017432" z="0.0" x="-50.09458260624501"/>
  </node>
  <node id="133781" label="SVIL" cy:nodeId="107349">
    <graphics y="-728.6282223120884" z="0.0" x="524.0657567492237"/>
  </node>
  <node id="133773" label="TERF2" cy:nodeId="107353">
    <graphics y="-1077.0336788550571" z="0.0" x="220.60362429530528"/>
  </node>
  <node id="133935" label="SLC35E1" cy:nodeId="106844">
    <graphics y="-71.61805995857276" z="0.0" x="549.3891515246144"/>
  </node>
  <node id="133769" label="TFCP2" cy:nodeId="107355">
    <graphics y="510.2455569847866" z="0.0" x="-288.6279078015575"/>
  </node>
  <node id="133936" label="BRD4" cy:nodeId="106843">
    <graphics y="-1.2775448218540078" z="0.0" x="564.5800084582081"/>
  </node>
  <node id="133927" label="CDK12" cy:nodeId="106848">
    <graphics y="-574.4864376441196" z="0.0" x="191.0327023974171"/>
  </node>
  <node id="133969" label="COG6" cy:nodeId="105824">
    <graphics y="-160.4818142310337" z="0.0" x="87.9351567736378"/>
  </node>
  <node id="133958" label="COG3" cy:nodeId="105823">
    <graphics y="-191.17431148445166" z="0.0" x="308.17295737178233"/>
  </node>
  <node id="133893" label="DCP1A" cy:nodeId="106850">
    <graphics y="325.7869388207241" z="0.0" x="178.5239781847706"/>
  </node>
  <node id="133887" label="ELF2" cy:nodeId="105825">
    <graphics y="-411.12904628669776" z="0.0" x="557.8521337023487"/>
  </node>
  <node id="133885" label="ERCC6" cy:nodeId="105830">
    <graphics y="100.77296176994287" z="0.0" x="305.49983878047374"/>
  </node>
  <node id="133884" label="ERF" cy:nodeId="105831">
    <graphics y="111.75330844963037" z="0.0" x="836.166159581255"/>
  </node>
  <node id="133853" label="GALNT7" cy:nodeId="106859">
    <graphics y="-153.33815273201026" z="0.0" x="-645.2382593640575"/>
  </node>
  <node id="133877" label="GPI" cy:nodeId="106864">
    <graphics y="1327.0349361046597" z="0.0" x="-1002.877915430952"/>
  </node>
  <node id="133878" label="GAPDH" cy:nodeId="106863">
    <graphics y="1317.7373592003628" z="0.0" x="-1102.4447412976513"/>
  </node>
  <node id="133891" label="EXTL2" cy:nodeId="105844">
    <graphics y="309.9015628441616" z="0.0" x="664.5734471789112"/>
  </node>
  <node id="133963" label="MGAT2" cy:nodeId="106868">
    <graphics y="329.17213169181787" z="0.0" x="-24.434395838666887"/>
  </node>
  <node id="133857" label="HIF1A" cy:nodeId="106867">
    <graphics y="-102.68757900154151" z="0.0" x="-94.82077889530751"/>
  </node>
  <node id="133819" label="SLC35B4" cy:nodeId="105845">
    <graphics y="404.66602817619287" z="0.0" x="-92.96009163944814"/>
  </node>
  <node id="133881" label="FANCD2" cy:nodeId="105847">
    <graphics y="-662.667925681229" z="0.0" x="-789.7148218640575"/>
  </node>
  <node id="133843" label="KDM4A" cy:nodeId="106874">
    <graphics y="245.0826846703335" z="0.0" x="-495.65641121952626"/>
  </node>
  <node id="133846" label="KDM1B" cy:nodeId="106873">
    <graphics y="482.18018833244287" z="0.0" x="852.2179784289112"/>
  </node>
  <node id="133777" label="GLCE" cy:nodeId="105851">
    <graphics y="-317.58212551033057" z="0.0" x="145.04579062373546"/>
  </node>
  <node id="133795" label="SIRT6" cy:nodeId="106885">
    <graphics y="1004.9045230492397" z="0.0" x="-759.067711878706"/>
  </node>
  <node id="133880" label="GABPA" cy:nodeId="105861">
    <graphics y="72.63450351798974" z="0.0" x="257.19140906245616"/>
  </node>
  <node id="133858" label="EXTL1" cy:nodeId="106887">
    <graphics y="1327.0349361046597" z="0.0" x="-404.1774378308544"/>
  </node>
  <node id="133876" label="GATAD1" cy:nodeId="105863">
    <graphics y="911.4798404320522" z="0.0" x="-523.4123850354442"/>
  </node>
  <node id="133870" label="GLYR1" cy:nodeId="105866">
    <graphics y="-286.3026092902378" z="0.0" x="505.1738500109425"/>
  </node>
  <node id="133925" label="COG8" cy:nodeId="106891">
    <graphics y="-907.2478512183384" z="0.0" x="207.05003447444346"/>
  </node>
  <node id="133758" label="ZBTB10" cy:nodeId="106894">
    <graphics y="512.1304446800991" z="0.0" x="-460.5424585828075"/>
  </node>
  <node id="133868" label="STT3A" cy:nodeId="106893">
    <graphics y="-414.55064662849463" z="0.0" x="-846.3862696179638"/>
  </node>
  <node id="133864" label="GTF2I" cy:nodeId="105871">
    <graphics y="13.286999855880367" z="0.0" x="336.8022527209034"/>
  </node>
  <node id="133949" label="PIGO" cy:nodeId="105874">
    <graphics y="-525.9429806128696" z="0.0" x="-360.00040536015126"/>
  </node>
  <node id="133862" label="HCFC1" cy:nodeId="105873">
    <graphics y="-417.0983913794712" z="0.0" x="-419.58652596562"/>
  </node>
  <node id="133860" label="HECTD1" cy:nodeId="105875">
    <graphics y="473.0478030785366" z="0.0" x="219.75387282283214"/>
  </node>
  <node id="133849" label="DPAGT1" cy:nodeId="105878">
    <graphics y="-260.33663877403296" z="0.0" x="-1070.1339502820263"/>
  </node>
  <node id="133850" label="HINFP" cy:nodeId="105877">
    <graphics y="-377.387522544022" z="0.0" x="-1029.0301905164013"/>
  </node>
  <node id="133863" label="MGAT5" cy:nodeId="105893">
    <graphics y="-226.20033916389502" z="0.0" x="562.8852757921925"/>
  </node>
  <node id="133790" label="GNB1" cy:nodeId="105902">
    <graphics y="612.7525760277554" z="0.0" x="244.88285059840587"/>
  </node>
  <node id="133845" label="KDM3A" cy:nodeId="105903">
    <graphics y="902.1822635277554" z="0.0" x="175.28809256465343"/>
  </node>
  <node id="133919" label="HS2ST1" cy:nodeId="105906">
    <graphics y="-27.604922141189945" z="0.0" x="35.63173575312999"/>
  </node>
  <node id="133943" label="B3GALNT2" cy:nodeId="105908">
    <graphics y="39.24323764884912" z="0.0" x="47.38411612422374"/>
  </node>
  <node id="133841" label="KDM5B" cy:nodeId="105907">
    <graphics y="16.669598732833492" z="0.0" x="105.9705571642628"/>
  </node>
  <node id="133869" label="GMEB1" cy:nodeId="120757">
    <graphics y="-406.90021022712745" z="0.0" x="-529.8440332898388"/>
  </node>
  <node id="133834" label="LYL1" cy:nodeId="105911">
    <graphics y="997.0154544457241" z="0.0" x="-1047.4182672986278"/>
  </node>
  <node id="133873" label="ST6GALNAC1" cy:nodeId="105920">
    <graphics y="-1087.4065426245884" z="0.0" x="1084.1543797960987"/>
  </node>
  <node id="133829" label="MECOM" cy:nodeId="105919">
    <graphics y="-630.2708004370884" z="0.0" x="1143.7556981554737"/>
  </node>
  <node id="133844" label="IDS" cy:nodeId="105922">
    <graphics y="911.4798404320522" z="0.0" x="274.85491843135264"/>
  </node>
  <node id="133828" label="MED1" cy:nodeId="105924">
    <graphics y="-217.16538890754737" z="0.0" x="-324.8898706921825"/>
  </node>
  <node id="133861" label="NDST1" cy:nodeId="105923">
    <graphics y="-129.87004360115088" z="0.0" x="-326.90714364140126"/>
  </node>
  <node id="133946" label="GALNT11" cy:nodeId="107974">
    <graphics y="-683.9207332984165" z="0.0" x="238.76942820460704"/>
  </node>
  <node id="133823" label="FUT8" cy:nodeId="107976">
    <graphics y="902.1822635277554" z="0.0" x="374.85491843135264"/>
  </node>
  <node id="133934" label="BRD7" cy:nodeId="107977">
    <graphics y="-332.58432277595557" z="0.0" x="-141.94983773319814"/>
  </node>
  <node id="133825" label="MRE11A" cy:nodeId="105931">
    <graphics y="-70.24592861091651" z="0.0" x="-183.243020106245"/>
  </node>
  <node id="133824" label="MYBL1" cy:nodeId="105934">
    <graphics y="911.4798404320522" z="0.0" x="474.42174429805186"/>
  </node>
  <node id="133821" label="NFAT5" cy:nodeId="105943">
    <graphics y="-341.9401195899204" z="0.0" x="14.992972325395613"/>
  </node>
  <node id="133859" label="HEYL" cy:nodeId="107993">
    <graphics y="1317.7373592003628" z="0.0" x="-503.7442636975536"/>
  </node>
  <node id="133817" label="NIPBL" cy:nodeId="105947">
    <graphics y="-45.31456264411963" z="0.0" x="90.73430533320811"/>
  </node>
  <node id="133937" label="SLC35D1" cy:nodeId="105950">
    <graphics y="96.84647861564599" z="0.0" x="210.19191450984385"/>
  </node>
  <node id="133842" label="KDM4C" cy:nodeId="107997">
    <graphics y="-160.0173595801548" z="0.0" x="157.96297354609874"/>
  </node>
  <node id="133914" label="SLC35A1" cy:nodeId="108001">
    <graphics y="-217.72276195442237" z="0.0" x="195.66875739009288"/>
  </node>
  <node id="133815" label="PHF20" cy:nodeId="105956">
    <graphics y="336.5501224144741" z="0.0" x="450.9985112658253"/>
  </node>
  <node id="133899" label="GCNT3" cy:nodeId="108003">
    <graphics y="-1703.0455196753696" z="0.0" x="-793.1515284070263"/>
  </node>
  <node id="133813" label="PHF6" cy:nodeId="105957">
    <graphics y="352.19776645744287" z="0.0" x="360.16438956172374"/>
  </node>
  <node id="133811" label="POLR3A" cy:nodeId="105960">
    <graphics y="-132.8858669654087" z="0.0" x="473.6111363878956"/>
  </node>
  <node id="133812" label="POLR2B" cy:nodeId="105959">
    <graphics y="-45.51521572029151" z="0.0" x="-25.081734705854387"/>
  </node>
  <node id="133956" label="UGGT2" cy:nodeId="105966">
    <graphics y="62.04685703361474" z="0.0" x="496.5244664660206"/>
  </node>
  <node id="133806" label="RB1" cy:nodeId="105965">
    <graphics y="95.47514072502099" z="0.0" x="-352.85733895390126"/>
  </node>
</graph>
