# Supplementary material for: A systems-based framework to computationally describe putative transcription factors and signaling pathways regulating glycan biosynthesis
Source: publisher site journal article supplement (doi:10.3762/bjoc.17.119), 2021-07-22
Supplement: Additional file 2 [file 1860-5397-17-119-S2.cys › CytoscapeSession-2021_03_21-12_01/views/128148-137935-UVM.xgmml]

<?xml version="1.0" encoding="UTF-8" standalone="yes"?>
<graph id="137935" label="UVM" cy:view="1" cy:networkId="128148" cy:visualStyle="default" cy:rendererId="org.cytoscape.ding" cy:documentVersion="3.0" xmlns:dc="http://purl.org/dc/elements/1.1/" xmlns:xlink="http://www.w3.org/1999/xlink" xmlns:rdf="http://www.w3.org/1999/02/22-rdf-syntax-ns#" xmlns:cy="http://www.cytoscape.org" xmlns="http://www.cs.rpi.edu/XGMML">
  <graphics>
    <att name="NETWORK_NODE_SELECTION" value="true" type="string" cy:type="String"/>
    <att name="NETWORK_CENTER_X_LOCATION" value="-31.101572015411236" type="string" cy:type="String"/>
    <att name="NETWORK_HEIGHT" value="510.0" type="string" cy:type="String"/>
    <att name="NETWORK_TITLE" value="UVM" type="string" cy:type="String"/>
    <att name="NETWORK_EDGE_SELECTION" value="true" type="string" cy:type="String"/>
    <att name="NETWORK_CENTER_Y_LOCATION" value="-262.72607371153623" type="string" cy:type="String"/>
    <att name="NETWORK_WIDTH" value="1312.0" type="string" cy:type="String"/>
    <att name="NETWORK_DEPTH" value="0.0" type="string" cy:type="String"/>
    <att name="NETWORK_SCALE_FACTOR" value="0.17448801722818416" type="string" cy:type="String"/>
    <att name="NETWORK_ANNOTATION_SELECTION" value="false" type="string" cy:type="String"/>
    <att name="NETWORK_CENTER_Z_LOCATION" value="0.0" type="string" cy:type="String"/>
  </graphics>
  <node id="138014" label="CHST14" cy:nodeId="108018">
    <graphics y="1410.2293019077051" z="0.0" x="-1056.0007213087185"/>
  </node>
  <node id="138024" label="PIGV" cy:nodeId="111090">
    <graphics y="1143.9657521030176" z="0.0" x="-977.0689815015896"/>
  </node>
  <node id="138162" label="PIGB" cy:nodeId="108020">
    <graphics y="-12.955939791513629" z="0.0" x="-287.78348955823026"/>
  </node>
  <node id="138157" label="CAMTA2" cy:nodeId="111093">
    <graphics y="-238.73725082666988" z="0.0" x="751.4027592210666"/>
  </node>
  <node id="138058" label="FPGT" cy:nodeId="105976">
    <graphics y="-275.925043604685" z="0.0" x="-721.3722346754178"/>
  </node>
  <node id="137973" label="RNF2" cy:nodeId="105975">
    <graphics y="-615.2135386684668" z="0.0" x="-517.9747127027615"/>
  </node>
  <node id="137942" label="SULF2" cy:nodeId="105979">
    <graphics y="97.30568883626347" z="0.0" x="1520.1633793382541"/>
  </node>
  <node id="138112" label="PIGA" cy:nodeId="108027">
    <graphics y="369.5218739291895" z="0.0" x="-711.4890559644803"/>
  </node>
  <node id="137969" label="RUNX3" cy:nodeId="105982">
    <graphics y="1226.8710560580957" z="0.0" x="-1071.3460505933865"/>
  </node>
  <node id="137955" label="TBP" cy:nodeId="108030">
    <graphics y="-872.2550425747168" z="0.0" x="-960.295879694949"/>
  </node>
  <node id="138040" label="HMGN3" cy:nodeId="111102">
    <graphics y="-794.6109690883886" z="0.0" x="-511.50501665783963"/>
  </node>
  <node id="137967" label="SIN3A" cy:nodeId="105984">
    <graphics y="181.77181289403325" z="0.0" x="-333.5279353590115"/>
  </node>
  <node id="137965" label="SIX5" cy:nodeId="105986">
    <graphics y="-405.505347750498" z="0.0" x="753.694842961301"/>
  </node>
  <node id="138079" label="UGCG" cy:nodeId="105985">
    <graphics y="-475.6815409878027" z="0.0" x="-206.32319292737088"/>
  </node>
  <node id="138000" label="MXI1" cy:nodeId="111108">
    <graphics y="-615.7832408169043" z="0.0" x="-595.6799281568631"/>
  </node>
  <node id="138164" label="ARNT2" cy:nodeId="108548">
    <graphics y="-170.0890650966894" z="0.0" x="-66.97382769299588"/>
  </node>
  <node id="137946" label="TEAD4" cy:nodeId="108035">
    <graphics y="-286.35218002588863" z="0.0" x="1403.9347874193088"/>
  </node>
  <node id="137977" label="PRAME" cy:nodeId="111111">
    <graphics y="131.87859008519536" z="0.0" x="453.86592450426974"/>
  </node>
  <node id="138115" label="UGDH" cy:nodeId="108551">
    <graphics y="128.95262954442387" z="0.0" x="-385.3110621900662"/>
  </node>
  <node id="137993" label="DDOST" cy:nodeId="108555">
    <graphics y="-64.69368698389644" z="0.0" x="2229.03975262927"/>
  </node>
  <node id="137971" label="B3GALNT1" cy:nodeId="111115">
    <graphics y="-887.6663584926855" z="0.0" x="-593.7497523756131"/>
  </node>
  <node id="137979" label="PIGC" cy:nodeId="108558">
    <graphics y="-279.14469101221675" z="0.0" x="-1113.3398860426053"/>
  </node>
  <node id="138045" label="GANAB" cy:nodeId="105998">
    <graphics y="1043.607948758291" z="0.0" x="-549.7656024427517"/>
  </node>
  <node id="138134" label="PIGF" cy:nodeId="108557">
    <graphics y="136.94637344090825" z="0.0" x="-520.6982158155545"/>
  </node>
  <node id="137945" label="GAA" cy:nodeId="108560">
    <graphics y="-107.56917526514644" z="0.0" x="1434.0634190111057"/>
  </node>
  <node id="137995" label="GALE" cy:nodeId="108559">
    <graphics y="60.892784573720746" z="0.0" x="2196.6534000902075"/>
  </node>
  <node id="138156" label="COG1" cy:nodeId="106005">
    <graphics y="-243.01837875635738" z="0.0" x="908.0911442308322"/>
  </node>
  <node id="137992" label="NAGA" cy:nodeId="108567">
    <graphics y="-202.64493515284175" z="0.0" x="2121.1612125902075"/>
  </node>
  <node id="137952" label="TCF12" cy:nodeId="106007">
    <graphics y="-21.82392074854488" z="0.0" x="-486.2441676588162"/>
  </node>
  <node id="138120" label="DAXX" cy:nodeId="108569">
    <graphics y="-279.78263046534175" z="0.0" x="2452.9859196214575"/>
  </node>
  <node id="138083" label="ALG5" cy:nodeId="106012">
    <graphics y="-162.17285873682613" z="0.0" x="-844.6103633375271"/>
  </node>
  <node id="138096" label="GALNT1" cy:nodeId="106014">
    <graphics y="-636.870093844248" z="0.0" x="-434.83352122021756"/>
  </node>
  <node id="137949" label="TEAD1" cy:nodeId="106013">
    <graphics y="-465.35050155909175" z="0.0" x="-395.19871935559354"/>
  </node>
  <node id="137944" label="TERF1" cy:nodeId="106015">
    <graphics y="-132.530005953623" z="0.0" x="-645.58297381116"/>
  </node>
  <node id="137951" label="PIGL" cy:nodeId="108578">
    <graphics y="67.7464833041895" z="0.0" x="-738.6119807691678"/>
  </node>
  <node id="138066" label="EXT1" cy:nodeId="108580">
    <graphics y="565.4624562045801" z="0.0" x="1736.475360539426"/>
  </node>
  <node id="138089" label="UGP2" cy:nodeId="108584">
    <graphics y="-316.93624069483394" z="0.0" x="-545.3035319776639"/>
  </node>
  <node id="138071" label="CHPF" cy:nodeId="108583">
    <graphics y="-744.513404391123" z="0.0" x="1250.046927121152"/>
  </node>
  <node id="137938" label="YAP1" cy:nodeId="106026">
    <graphics y="-201.8664546230566" z="0.0" x="-373.4045108289822"/>
  </node>
  <node id="138072" label="SLC35A4" cy:nodeId="108586">
    <graphics y="-465.34574081690425" z="0.0" x="1377.991489079465"/>
  </node>
  <node id="137939" label="XRN2" cy:nodeId="106025">
    <graphics y="-113.27338363916988" z="0.0" x="-439.29603419018827"/>
  </node>
  <node id="138152" label="HEXB" cy:nodeId="108585">
    <graphics y="120.51168105809575" z="0.0" x="-99.74714312268338"/>
  </node>
  <node id="138131" label="B3GALT4" cy:nodeId="106030">
    <graphics y="-430.280494234873" z="0.0" x="1199.8149868516819"/>
  </node>
  <node id="138113" label="C1GALT1C1" cy:nodeId="106032">
    <graphics y="95.494408108877" z="0.0" x="-593.1808131666287"/>
  </node>
  <node id="138082" label="SULT1A3" cy:nodeId="108594">
    <graphics y="-128.9690928676855" z="0.0" x="-772.397198054324"/>
  </node>
  <node id="138166" label="ALKBH3" cy:nodeId="113210">
    <graphics y="566.8993153354395" z="0.0" x="-203.90618548108182"/>
  </node>
  <node id="138121" label="CHST5" cy:nodeId="108612">
    <graphics y="1400.9317250034082" z="0.0" x="-956.0007213087185"/>
  </node>
  <node id="138037" label="ING5" cy:nodeId="113224">
    <graphics y="425.77449844090825" z="0.0" x="-261.40284380627713"/>
  </node>
  <node id="137961" label="SMARCB1" cy:nodeId="108617">
    <graphics y="195.95146987645512" z="0.0" x="1095.162128117551"/>
  </node>
  <node id="137956" label="SUPT5H" cy:nodeId="108622">
    <graphics y="-143.95299484522457" z="0.0" x="844.7599369554416"/>
  </node>
  <node id="137943" label="TFE3" cy:nodeId="108625">
    <graphics y="80.09387920110112" z="0.0" x="1398.8305088548557"/>
  </node>
  <node id="138143" label="CHD7" cy:nodeId="112217">
    <graphics y="230.9352040073145" z="0.0" x="-170.6122096510037"/>
  </node>
  <node id="138022" label="L3MBTL2" cy:nodeId="112224">
    <graphics y="946.3445362827051" z="0.0" x="306.45934262560763"/>
  </node>
  <node id="137988" label="PALB2" cy:nodeId="112228">
    <graphics y="-1011.9471202114355" z="0.0" x="-597.8435328931912"/>
  </node>
  <node id="138093" label="B4GALT4" cy:nodeId="112227">
    <graphics y="-740.8584361294043" z="0.0" x="-186.92554888440213"/>
  </node>
  <node id="138075" label="C1GALT1" cy:nodeId="109670">
    <graphics y="-514.8136210659277" z="0.0" x="-303.66097674084745"/>
  </node>
  <node id="138029" label="UXS1" cy:nodeId="109669">
    <graphics y="-243.52115585596675" z="0.0" x="-167.31412920666776"/>
  </node>
  <node id="137950" label="TCFL5" cy:nodeId="112232">
    <graphics y="-404.9573436001074" z="0.0" x="-17.829418513308383"/>
  </node>
  <node id="138078" label="ALG2" cy:nodeId="109671">
    <graphics y="-53.99861862452144" z="0.0" x="-825.9820369215115"/>
  </node>
  <node id="137990" label="NR1H2" cy:nodeId="109685">
    <graphics y="-1012.4850230434668" z="0.0" x="689.9409977464572"/>
  </node>
  <node id="137948" label="TEAD2" cy:nodeId="109690">
    <graphics y="1410.2293019077051" z="0.0" x="-656.8670695753201"/>
  </node>
  <node id="138077" label="PIGG" cy:nodeId="109689">
    <graphics y="-321.9208865383398" z="0.0" x="-110.11677202893338"/>
  </node>
  <node id="137940" label="WRNIP1" cy:nodeId="109692">
    <graphics y="-646.7195506313574" z="0.0" x="-181.3469508619412"/>
  </node>
  <node id="137941" label="TGIF1" cy:nodeId="109691">
    <graphics y="-1017.8021617153418" z="0.0" x="-417.7124942274197"/>
  </node>
  <node id="138124" label="CREM" cy:nodeId="126103">
    <graphics y="-251.40257980616207" z="0.0" x="43.32475629137912"/>
  </node>
  <node id="138153" label="CBX5" cy:nodeId="128158">
    <graphics y="118.6122059604395" z="0.0" x="-5.861828181277133"/>
  </node>
  <node id="138161" label="BCOR" cy:nodeId="110788">
    <graphics y="101.12334487645512" z="0.0" x="-989.9819758863553"/>
  </node>
  <node id="138118" label="DDIT3" cy:nodeId="110793">
    <graphics y="72.30394790379887" z="0.0" x="-202.8904841871365"/>
  </node>
  <node id="138052" label="GTF3C1" cy:nodeId="110795">
    <graphics y="194.90619704930668" z="0.0" x="945.1028934984104"/>
  </node>
  <node id="138017" label="MAFG" cy:nodeId="110799">
    <graphics y="937.0469593784082" z="0.0" x="-192.24113497449002"/>
  </node>
  <node id="138006" label="MNT" cy:nodeId="110801">
    <graphics y="937.0469593784082" z="0.0" x="-504.48255190564237"/>
  </node>
  <node id="138110" label="GALK2" cy:nodeId="110806">
    <graphics y="-67.34317734034175" z="0.0" x="-421.3119784326657"/>
  </node>
  <node id="137985" label="PIAS4" cy:nodeId="110808">
    <graphics y="-353.03812362940425" z="0.0" x="913.4825016527072"/>
  </node>
  <node id="138114" label="STT3B" cy:nodeId="105688">
    <graphics y="-180.797828219248" z="0.0" x="-432.9094851942166"/>
  </node>
  <node id="138031" label="MAN1A2" cy:nodeId="105687">
    <graphics y="-364.8556361416113" z="0.0" x="-401.83575281811795"/>
  </node>
  <node id="138139" label="FUT11" cy:nodeId="105690">
    <graphics y="193.4403309604395" z="0.0" x="-460.77807268811307"/>
  </node>
  <node id="137981" label="NEU3" cy:nodeId="105689">
    <graphics y="517.6923451205957" z="0.0" x="-41.10905108166776"/>
  </node>
  <node id="138138" label="COG5" cy:nodeId="105692">
    <graphics y="60.223534085439496" z="0.0" x="-343.37311205578885"/>
  </node>
  <node id="137960" label="SNAPC5" cy:nodeId="110811">
    <graphics y="-634.4973826626074" z="0.0" x="4.295428898800992"/>
  </node>
  <node id="138055" label="MAN2A1" cy:nodeId="105694">
    <graphics y="-61.580054781748004" z="0.0" x="-338.47826037121854"/>
  </node>
  <node id="138107" label="SLC35F5" cy:nodeId="105696">
    <graphics y="-241.13413955958003" z="0.0" x="-561.258526179324"/>
  </node>
  <node id="138086" label="SLC35A3" cy:nodeId="105695">
    <graphics y="-393.1072764614355" z="0.0" x="-600.2171901197537"/>
  </node>
  <node id="138165" label="RTF1" cy:nodeId="105700">
    <graphics y="325.239281155752" z="0.0" x="-314.05607256604276"/>
  </node>
  <node id="138094" label="SLC35A5" cy:nodeId="105702">
    <graphics y="-713.3505320766699" z="0.0" x="-493.8608668775662"/>
  </node>
  <node id="138092" label="GALNT4" cy:nodeId="105703">
    <graphics y="-701.6715769985449" z="0.0" x="-349.4852794141873"/>
  </node>
  <node id="138148" label="UGGT1" cy:nodeId="105705">
    <graphics y="462.975853421377" z="0.0" x="-376.7581828565701"/>
  </node>
  <node id="138081" label="B3GNT5" cy:nodeId="105707">
    <graphics y="-32.715812228037066" z="0.0" x="-961.3490413160428"/>
  </node>
  <node id="138088" label="ALG10" cy:nodeId="105711">
    <graphics y="-303.1309447506201" z="0.0" x="-922.236797663699"/>
  </node>
  <node id="138087" label="FKTN" cy:nodeId="105713">
    <graphics y="-383.8998103359472" z="0.0" x="-663.0872004957303"/>
  </node>
  <node id="138018" label="MAN1A1" cy:nodeId="105716">
    <graphics y="543.6327137729395" z="0.0" x="-645.6367610426053"/>
  </node>
  <node id="138035" label="CSGALNACT2" cy:nodeId="105715">
    <graphics y="-536.1999430874121" z="0.0" x="-436.07742342663846"/>
  </node>
  <node id="138076" label="CHST11" cy:nodeId="105718">
    <graphics y="-148.45250656397457" z="0.0" x="-966.0210383863553"/>
  </node>
  <node id="138095" label="CHSY1" cy:nodeId="105717">
    <graphics y="-939.6517100551855" z="0.0" x="-117.81953081799588"/>
  </node>
  <node id="138163" label="ALG10B" cy:nodeId="105727">
    <graphics y="-372.5422358730566" z="0.0" x="-247.57165178967557"/>
  </node>
  <node id="138102" label="PIGN" cy:nodeId="105730">
    <graphics y="-614.4756541469824" z="0.0" x="-1155.5675471754178"/>
  </node>
  <node id="138099" label="PIGW" cy:nodeId="105729">
    <graphics y="-365.4472117641699" z="0.0" x="-857.9659236402615"/>
  </node>
  <node id="137980" label="POLR3GL" cy:nodeId="114948">
    <graphics y="-256.52148010523433" z="0.0" x="-825.9476130933865"/>
  </node>
  <node id="138151" label="SLC35E3" cy:nodeId="105732">
    <graphics y="137.02120254247075" z="0.0" x="-261.23682818127713"/>
  </node>
  <node id="138084" label="FAM20B" cy:nodeId="105731">
    <graphics y="-515.8694377163183" z="0.0" x="-625.2859309644803"/>
  </node>
  <node id="137989" label="PMM1" cy:nodeId="105735">
    <graphics y="-831.0179820278418" z="0.0" x="762.3204227952854"/>
  </node>
  <node id="138011" label="B4GALT1" cy:nodeId="107274">
    <graphics y="937.0469593784082" z="0.0" x="-391.80796084118924"/>
  </node>
  <node id="138127" label="HYAL2" cy:nodeId="105737">
    <graphics y="-360.0172801235449" z="0.0" x="2571.06807294177"/>
  </node>
  <node id="138159" label="BRD2" cy:nodeId="107276">
    <graphics y="-1288.3541636684668" z="0.0" x="-137.41596636487088"/>
  </node>
  <node id="138150" label="CMAS" cy:nodeId="105742">
    <graphics y="15.671257474111371" z="0.0" x="-51.27125200940213"/>
  </node>
  <node id="138158" label="FUT10" cy:nodeId="107278">
    <graphics y="-1143.9015269497168" z="0.0" x="-200.1581080885037"/>
  </node>
  <node id="138154" label="RFNG" cy:nodeId="105744">
    <graphics y="-1171.1800914028418" z="0.0" x="631.029071476926"/>
  </node>
  <node id="138136" label="B4GALT5" cy:nodeId="107279">
    <graphics y="389.8248524448145" z="0.0" x="-550.7155726881131"/>
  </node>
  <node id="138155" label="CBX4" cy:nodeId="105743">
    <graphics y="-1288.3541636684668" z="0.0" x="676.4698063402072"/>
  </node>
  <node id="138116" label="DNMT3A" cy:nodeId="107282">
    <graphics y="46.19561050145512" z="0.0" x="-526.389370295535"/>
  </node>
  <node id="138108" label="SLC35B3" cy:nodeId="107281">
    <graphics y="3.4441456577051213" z="0.0" x="-579.2368434400662"/>
  </node>
  <node id="138098" label="E2F3" cy:nodeId="107284">
    <graphics y="-773.6836009243261" z="0.0" x="-286.07787737561307"/>
  </node>
  <node id="137996" label="ST3GAL3" cy:nodeId="105747">
    <graphics y="52.3381352206934" z="0.0" x="2055.2220036058325"/>
  </node>
  <node id="137974" label="ALG8" cy:nodeId="107286">
    <graphics y="837.0469593784082" z="0.0" x="1339.4377171068088"/>
  </node>
  <node id="138085" label="EED" cy:nodeId="107285">
    <graphics y="-128.3388896206152" z="0.0" x="-560.1192439527615"/>
  </node>
  <node id="138119" label="HYAL1" cy:nodeId="105751">
    <graphics y="-187.926002047373" z="0.0" x="2311.0513493089575"/>
  </node>
  <node id="138061" label="GALK1" cy:nodeId="105753">
    <graphics y="498.680687405752" z="0.0" x="1211.7488934068576"/>
  </node>
  <node id="138069" label="ERCC3" cy:nodeId="107292">
    <graphics y="-324.87152054102535" z="0.0" x="-453.81146654797635"/>
  </node>
  <node id="137972" label="PAPSS1" cy:nodeId="107291">
    <graphics y="-877.0831675747168" z="0.0" x="-702.7542842359646"/>
  </node>
  <node id="138038" label="DPM2" cy:nodeId="105758">
    <graphics y="353.02306411473637" z="0.0" x="1149.6030918626682"/>
  </node>
  <node id="138023" label="MAN1B1" cy:nodeId="105760">
    <graphics y="1077.9179005405176" z="0.0" x="-759.9257892103299"/>
  </node>
  <node id="138050" label="PIGQ" cy:nodeId="105759">
    <graphics y="325.67318008153325" z="0.0" x="933.8257633714572"/>
  </node>
  <node id="138144" label="GNE" cy:nodeId="107297">
    <graphics y="288.63179824559575" z="0.0" x="230.83772626208224"/>
  </node>
  <node id="138049" label="GTF3C2" cy:nodeId="107302">
    <graphics y="64.31281326024418" z="0.0" x="838.184344914426"/>
  </node>
  <node id="138109" label="OGT" cy:nodeId="105771">
    <graphics y="-189.95394851954097" z="0.0" x="-520.7684672803982"/>
  </node>
  <node id="138140" label="CHD8" cy:nodeId="105774">
    <graphics y="350.30147597997075" z="0.0" x="-422.2513757677182"/>
  </node>
  <node id="138130" label="GBA" cy:nodeId="107309">
    <graphics y="61.249893643544965" z="0.0" x="1128.2720982103244"/>
  </node>
  <node id="138145" label="CHD4" cy:nodeId="105773">
    <graphics y="221.636253812002" z="0.0" x="44.31471600817599"/>
  </node>
  <node id="138032" label="KDM2B" cy:nodeId="107313">
    <graphics y="14.533592679189496" z="0.0" x="-373.19591173840604"/>
  </node>
  <node id="137994" label="B3GALT6" cy:nodeId="105781">
    <graphics y="-109.40448715479488" z="0.0" x="2007.718524601926"/>
  </node>
  <node id="138133" label="CREB3" cy:nodeId="105786">
    <graphics y="-207.82926132471675" z="0.0" x="1128.03811993884"/>
  </node>
  <node id="138128" label="CREB3L4" cy:nodeId="105788">
    <graphics y="-429.31925155909175" z="0.0" x="2667.8255192308325"/>
  </node>
  <node id="138132" label="GMPPA" cy:nodeId="105787">
    <graphics y="-245.960670016123" z="0.0" x="1281.849435475339"/>
  </node>
  <node id="138126" label="CREBBP" cy:nodeId="105790">
    <graphics y="785.2790150424707" z="0.0" x="114.01546063708224"/>
  </node>
  <node id="137947" label="B4GALT3" cy:nodeId="105789">
    <graphics y="1400.9317250034082" z="0.0" x="-756.4338954420193"/>
  </node>
  <node id="138012" label="MEF2D" cy:nodeId="107325">
    <graphics y="946.3445362827051" z="0.0" x="-292.24113497449"/>
  </node>
  <node id="138137" label="POFUT1" cy:nodeId="105792">
    <graphics y="589.946800687002" z="0.0" x="-403.41588244153104"/>
  </node>
  <node id="137962" label="COG7" cy:nodeId="105791">
    <graphics y="-285.96238972933406" z="0.0" x="-639.6585048170193"/>
  </node>
  <node id="137998" label="NFYA" cy:nodeId="107329">
    <graphics y="-79.29418136866207" z="0.0" x="-494.110691401492"/>
  </node>
  <node id="138122" label="CTBP1" cy:nodeId="105793">
    <graphics y="1410.2293019077051" z="0.0" x="-856.4338954420193"/>
  </node>
  <node id="138073" label="ALG3" cy:nodeId="105797">
    <graphics y="-641.8228526333105" z="0.0" x="1050.5870396165744"/>
  </node>
  <node id="137983" label="PML" cy:nodeId="107336">
    <graphics y="-592.5223155239355" z="0.0" x="852.759540226926"/>
  </node>
  <node id="138123" label="DPM1" cy:nodeId="105799">
    <graphics y="-234.7401881435644" z="0.0" x="-316.8377727003201"/>
  </node>
  <node id="138091" label="E2F6" cy:nodeId="105801">
    <graphics y="-188.68109848291988" z="0.0" x="-596.1385005445584"/>
  </node>
  <node id="137976" label="MPI" cy:nodeId="107340">
    <graphics y="157.59092757909184" z="0.0" x="330.83772626208224"/>
  </node>
  <node id="137957" label="CHST3" cy:nodeId="105807">
    <graphics y="946.3445362827051" z="0.0" x="106.89251675890841"/>
  </node>
  <node id="137959" label="SP2" cy:nodeId="107346">
    <graphics y="1140.7507729312647" z="0.0" x="-491.80796084118924"/>
  </node>
  <node id="138041" label="FUT4" cy:nodeId="105810">
    <graphics y="-767.9738841274511" z="0.0" x="-401.6327250928982"/>
  </node>
  <node id="137958" label="STAT6" cy:nodeId="107348">
    <graphics y="937.0469593784082" z="0.0" x="7.325690892209195"/>
  </node>
  <node id="138057" label="PIGK" cy:nodeId="106835">
    <graphics y="-198.23030807764644" z="0.0" x="-693.8398555250271"/>
  </node>
  <node id="138007" label="B3GNT2" cy:nodeId="106838">
    <graphics y="-593.2268138149511" z="0.0" x="-827.1587642164334"/>
  </node>
  <node id="138054" label="LAMP2" cy:nodeId="107350">
    <graphics y="-409.5836711147558" z="0.0" x="-323.816143366824"/>
  </node>
  <node id="138074" label="EGLN2" cy:nodeId="105813">
    <graphics y="-600.3904795864355" z="0.0" x="1252.621531632413"/>
  </node>
  <node id="138104" label="UAP1" cy:nodeId="105820">
    <graphics y="-38.94301559717769" z="0.0" x="-720.039532038699"/>
  </node>
  <node id="138111" label="COG6" cy:nodeId="105824">
    <graphics y="-144.65167953760738" z="0.0" x="-366.52005037976346"/>
  </node>
  <node id="138147" label="CDK12" cy:nodeId="106848">
    <graphics y="377.48177383153325" z="0.0" x="-922.8064998121365"/>
  </node>
  <node id="138106" label="COG3" cy:nodeId="105823">
    <graphics y="-249.68715240748043" z="0.0" x="-497.0923427076443"/>
  </node>
  <node id="138149" label="CBX6" cy:nodeId="106847">
    <graphics y="718.2161488315332" z="0.0" x="-343.28467974377713"/>
  </node>
  <node id="138016" label="XYLT1" cy:nodeId="106854">
    <graphics y="946.3445362827051" z="0.0" x="-92.6743091077908"/>
  </node>
  <node id="138019" label="ST8SIA4" cy:nodeId="105834">
    <graphics y="260.569603421377" z="0.0" x="-665.549053523074"/>
  </node>
  <node id="138142" label="GCNT4" cy:nodeId="106858">
    <graphics y="369.89827773778325" z="0.0" x="11.090716984738492"/>
  </node>
  <node id="137953" label="UST" cy:nodeId="105836">
    <graphics y="-948.3592906215918" z="0.0" x="-1124.9198420972928"/>
  </node>
  <node id="138080" label="MGAT4A" cy:nodeId="106860">
    <graphics y="88.0221180698145" z="0.0" x="-452.38392290783963"/>
  </node>
  <node id="138068" label="FUS" cy:nodeId="106862">
    <graphics y="489.49645278661137" z="0.0" x="1630.2137943773166"/>
  </node>
  <node id="138009" label="ST8SIA1" cy:nodeId="105840">
    <graphics y="1410.2293019077051" z="0.0" x="-457.3002437086209"/>
  </node>
  <node id="138064" label="GPI" cy:nodeId="106864">
    <graphics y="946.3445362827051" z="0.0" x="506.02616849230685"/>
  </node>
  <node id="138065" label="GAPDH" cy:nodeId="106863">
    <graphics y="937.0469593784082" z="0.0" x="406.45934262560763"/>
  </node>
  <node id="138062" label="GPS2" cy:nodeId="106865">
    <graphics y="613.3180775424707" z="0.0" x="1177.9965778856174"/>
  </node>
  <node id="138090" label="EXTL2" cy:nodeId="105844">
    <graphics y="-305.5413336971533" z="0.0" x="-355.07924685193143"/>
  </node>
  <node id="138160" label="MGAT2" cy:nodeId="106868">
    <graphics y="-56.731925509287066" z="0.0" x="-644.0996516676053"/>
  </node>
  <node id="137970" label="GALC" cy:nodeId="106869">
    <graphics y="-913.8902354458105" z="0.0" x="-478.21736178113065"/>
  </node>
  <node id="138100" label="SLC35B4" cy:nodeId="105845">
    <graphics y="-493.69898178370113" z="0.0" x="-798.7819026441678"/>
  </node>
  <node id="138026" label="KDM4A" cy:nodeId="106874">
    <graphics y="1055.5409779330957" z="0.0" x="-876.515850398074"/>
  </node>
  <node id="138020" label="MAF" cy:nodeId="106876">
    <graphics y="302.16866347997075" z="0.0" x="-508.5559428663357"/>
  </node>
  <node id="138043" label="PIGH" cy:nodeId="105852">
    <graphics y="167.55892226903325" z="0.0" x="-873.6824763746365"/>
  </node>
  <node id="138101" label="GLCE" cy:nodeId="105851">
    <graphics y="-591.1449046352636" z="0.0" x="-717.9506953687771"/>
  </node>
  <node id="138010" label="MEIS3" cy:nodeId="106878">
    <graphics y="1400.9317250034082" z="0.0" x="-556.8670695753201"/>
  </node>
  <node id="138135" label="RPN2" cy:nodeId="105854">
    <graphics y="609.2889027377832" z="0.0" x="-516.7695430250271"/>
  </node>
  <node id="138097" label="GNPNAT1" cy:nodeId="105855">
    <graphics y="-625.5223155239355" z="0.0" x="-346.08729967785916"/>
  </node>
  <node id="138141" label="GFPT1" cy:nodeId="106882">
    <graphics y="223.7796864291895" z="0.0" x="-391.2674830885037"/>
  </node>
  <node id="137978" label="PPARA" cy:nodeId="106881">
    <graphics y="-61.007010958505816" z="0.0" x="-149.39728960705838"/>
  </node>
  <node id="137964" label="SMAD2" cy:nodeId="106886">
    <graphics y="-477.35086777002925" z="0.0" x="-540.9709437818631"/>
  </node>
  <node id="137966" label="SIRT6" cy:nodeId="106885">
    <graphics y="393.55187270848637" z="0.0" x="1026.733173039426"/>
  </node>
  <node id="138060" label="GTF2B" cy:nodeId="105868">
    <graphics y="-148.51175644190425" z="0.0" x="-492.19617876721463"/>
  </node>
  <node id="138001" label="ALG1" cy:nodeId="105867">
    <graphics y="733.708275296377" z="0.0" x="983.1363102464572"/>
  </node>
  <node id="138051" label="COG8" cy:nodeId="106891">
    <graphics y="236.84163711278325" z="0.0" x="811.1401859788791"/>
  </node>
  <node id="137937" label="ZBTB10" cy:nodeId="106894">
    <graphics y="-365.50067093165035" z="0.0" x="-766.6236995191678"/>
  </node>
  <node id="138053" label="GTF2F1" cy:nodeId="105870">
    <graphics y="-1230.5481333950293" z="0.0" x="520.6744572191135"/>
  </node>
  <node id="138059" label="CTBS" cy:nodeId="105869">
    <graphics y="53.67400405614262" z="0.0" x="-846.8209651441678"/>
  </node>
  <node id="138047" label="H2AFX" cy:nodeId="105872">
    <graphics y="520.9823841830957" z="0.0" x="1494.3001133470432"/>
  </node>
  <node id="138046" label="HCFC1" cy:nodeId="105873">
    <graphics y="1069.3089070102442" z="0.0" x="-659.9257892103299"/>
  </node>
  <node id="138044" label="HECTD1" cy:nodeId="105875">
    <graphics y="242.437767483877" z="0.0" x="-775.7916987867459"/>
  </node>
  <node id="138070" label="DPAGT1" cy:nodeId="105878">
    <graphics y="-681.7334361294043" z="0.0" x="1376.7620121507541"/>
  </node>
  <node id="138042" label="HINFP" cy:nodeId="105877">
    <graphics y="-869.8274913051855" z="0.0" x="-312.69923052502713"/>
  </node>
  <node id="138067" label="TSTA3" cy:nodeId="105880">
    <graphics y="407.0851063510645" z="0.0" x="1447.552997258176"/>
  </node>
  <node id="138039" label="HSF1" cy:nodeId="105879">
    <graphics y="422.00377700536137" z="0.0" x="1294.6837727098361"/>
  </node>
  <node id="138036" label="INO80" cy:nodeId="105885">
    <graphics y="-273.3588443020117" z="0.0" x="-255.01144060803495"/>
  </node>
  <node id="138125" label="MGAT5" cy:nodeId="105893">
    <graphics y="648.844017483877" z="0.0" x="19.120624211300992"/>
  </node>
  <node id="137968" label="FKRP" cy:nodeId="105896">
    <graphics y="1300.9317250034082" z="0.0" x="-1155.5675471754178"/>
  </node>
  <node id="138034" label="KAT5" cy:nodeId="105900">
    <graphics y="-602.7148814419043" z="0.0" x="581.1051212816135"/>
  </node>
  <node id="138025" label="GNB1" cy:nodeId="105902">
    <graphics y="937.0469593784082" z="0.0" x="-883.8057368726834"/>
  </node>
  <node id="138117" label="B3GALNT2" cy:nodeId="105908">
    <graphics y="-0.5206065395605037" z="0.0" x="-430.42096361828885"/>
  </node>
  <node id="138103" label="DYRK1A" cy:nodeId="120755">
    <graphics y="-543.8862376430761" z="0.0" x="-958.3202327222928"/>
  </node>
  <node id="138063" label="GMEB1" cy:nodeId="120757">
    <graphics y="-731.2692332485449" z="0.0" x="-799.879619929324"/>
  </node>
  <node id="138002" label="RENBP" cy:nodeId="105912">
    <graphics y="642.1431507846582" z="0.0" x="773.7014042405979"/>
  </node>
  <node id="138015" label="MAZ" cy:nodeId="105916">
    <graphics y="1400.9317250034082" z="0.0" x="-1155.5675471754178"/>
  </node>
  <node id="137963" label="IDS" cy:nodeId="105922">
    <graphics y="-702.7573924282324" z="0.0" x="-712.4358027906521"/>
  </node>
  <node id="137984" label="NDST1" cy:nodeId="105923">
    <graphics y="-460.98014023096675" z="0.0" x="931.5112186937229"/>
  </node>
  <node id="138048" label="NEU1" cy:nodeId="107971">
    <graphics y="99.7070488712061" z="0.0" x="614.996112492551"/>
  </node>
  <node id="138013" label="MEF2C" cy:nodeId="105926">
    <graphics y="-424.0184092739355" z="0.0" x="-447.760780665408"/>
  </node>
  <node id="138027" label="GALNT11" cy:nodeId="107974">
    <graphics y="-68.68131210596675" z="0.0" x="-553.25875506116"/>
  </node>
  <node id="138105" label="FUT8" cy:nodeId="107976">
    <graphics y="28.187950589345746" z="0.0" x="-659.3845332594021"/>
  </node>
  <node id="138008" label="MITF" cy:nodeId="105929">
    <graphics y="-398.52149917872066" z="0.0" x="-513.5488475294217"/>
  </node>
  <node id="137999" label="PIGX" cy:nodeId="107980">
    <graphics y="-747.3214793422949" z="0.0" x="-619.9069941969021"/>
  </node>
  <node id="138005" label="MXD3" cy:nodeId="105933">
    <graphics y="655.9278797885645" z="0.0" x="912.0492741136447"/>
  </node>
  <node id="138021" label="LAMP1" cy:nodeId="107981">
    <graphics y="937.0469593784082" z="0.0" x="206.8925167589084"/>
  </node>
  <node id="137991" label="CTSA" cy:nodeId="107984">
    <graphics y="6.203506924794965" z="0.0" x="1765.4993778734104"/>
  </node>
  <node id="138129" label="B3GNT8" cy:nodeId="107983">
    <graphics y="-299.9874034145605" z="0.0" x="1107.003421452512"/>
  </node>
  <node id="138033" label="SLC35C2" cy:nodeId="107986">
    <graphics y="-550.0461802700293" z="0.0" x="705.0668522386447"/>
  </node>
  <node id="137997" label="NFYC" cy:nodeId="105946">
    <graphics y="-63.366004488779254" z="0.0" x="2101.7547184495825"/>
  </node>
  <node id="138028" label="SLC35D1" cy:nodeId="105950">
    <graphics y="-176.34549667627925" z="0.0" x="-234.09103045178495"/>
  </node>
  <node id="138030" label="GALNT3" cy:nodeId="108000">
    <graphics y="197.61333511083012" z="0.0" x="-574.6628535719021"/>
  </node>
  <node id="138004" label="NANS" cy:nodeId="108002">
    <graphics y="832.3396839877832" z="0.0" x="897.8390690355197"/>
  </node>
  <node id="138146" label="PIGM" cy:nodeId="105954">
    <graphics y="177.21367690770512" z="0.0" x="-719.9065364332303"/>
  </node>
  <node id="137954" label="SLC35A1" cy:nodeId="108001">
    <graphics y="-1041.217261812998" z="0.0" x="-1023.4567073316678"/>
  </node>
  <node id="137986" label="PHF20" cy:nodeId="105956">
    <graphics y="-538.1863322475683" z="0.0" x="72.73335614489474"/>
  </node>
  <node id="137987" label="PCGF1" cy:nodeId="105955">
    <graphics y="228.80742690770512" z="0.0" x="1309.6411854295627"/>
  </node>
  <node id="137982" label="POLR3A" cy:nodeId="105960">
    <graphics y="368.83980605809575" z="0.0" x="-181.69976458264432"/>
  </node>
  <node id="138003" label="DAD1" cy:nodeId="108008">
    <graphics y="764.104027249502" z="0.0" x="784.4143864183322"/>
  </node>
  <node id="137975" label="RAC3" cy:nodeId="105964">
    <graphics y="704.6797718784082" z="0.0" x="1296.272063878049"/>
  </node>
  <node id="138056" label="UGGT2" cy:nodeId="105966">
    <graphics y="-250.29956772120113" z="0.0" x="-419.158115419875"/>
  </node>
</graph>
