# Supplementary material for: A systems-based framework to computationally describe putative transcription factors and signaling pathways regulating glycan biosynthesis
Source: publisher site journal article supplement (doi:10.3762/bjoc.17.119), 2021-07-22
Supplement: Additional file 2 [file 1860-5397-17-119-S2.cys › CytoscapeSession-2021_03_21-12_01/views/128575-155670-ACC.xgmml]

<?xml version="1.0" encoding="UTF-8" standalone="yes"?>
<graph id="155670" label="ACC" cy:view="1" cy:networkId="128575" cy:visualStyle="default" cy:rendererId="org.cytoscape.ding" cy:documentVersion="3.0" xmlns:dc="http://purl.org/dc/elements/1.1/" xmlns:xlink="http://www.w3.org/1999/xlink" xmlns:rdf="http://www.w3.org/1999/02/22-rdf-syntax-ns#" xmlns:cy="http://www.cytoscape.org" xmlns="http://www.cs.rpi.edu/XGMML">
  <graphics>
    <att name="NETWORK_NODE_SELECTION" value="true" type="string" cy:type="String"/>
    <att name="NETWORK_CENTER_X_LOCATION" value="226.18084716796875" type="string" cy:type="String"/>
    <att name="NETWORK_HEIGHT" value="510.0" type="string" cy:type="String"/>
    <att name="NETWORK_TITLE" value="ACC" type="string" cy:type="String"/>
    <att name="NETWORK_EDGE_SELECTION" value="true" type="string" cy:type="String"/>
    <att name="NETWORK_CENTER_Y_LOCATION" value="-360.09002685546875" type="string" cy:type="String"/>
    <att name="NETWORK_WIDTH" value="1312.0" type="string" cy:type="String"/>
    <att name="NETWORK_DEPTH" value="0.0" type="string" cy:type="String"/>
    <att name="NETWORK_SCALE_FACTOR" value="0.11544960194411914" type="string" cy:type="String"/>
    <att name="NETWORK_ANNOTATION_SELECTION" value="false" type="string" cy:type="String"/>
    <att name="NETWORK_CENTER_Z_LOCATION" value="0.0" type="string" cy:type="String"/>
  </graphics>
  <node id="155701" label="RBL2" cy:nodeId="105968">
    <graphics y="-457.14376038350883" z="0.0" x="737.6477274864343"/>
  </node>
  <node id="155813" label="ALG10" cy:nodeId="105711">
    <graphics y="1510.6898425217646" z="0.0" x="268.2885432212976"/>
  </node>
  <node id="155715" label="FKTN" cy:nodeId="105713">
    <graphics y="-141.62209290304008" z="0.0" x="-957.3626484901282"/>
  </node>
  <node id="155743" label="CSGALNACT2" cy:nodeId="105715">
    <graphics y="-2059.938193977259" z="0.0" x="-97.17272234266727"/>
  </node>
  <node id="155725" label="HS3ST5" cy:nodeId="114931">
    <graphics y="976.417961418249" z="0.0" x="-51.06449175184696"/>
  </node>
  <node id="155699" label="RFX7" cy:nodeId="105974">
    <graphics y="-1850.7035138014776" z="0.0" x="1038.9988627403404"/>
  </node>
  <node id="155793" label="CD59" cy:nodeId="111094">
    <graphics y="121.13999205789742" z="0.0" x="208.2082285850671"/>
  </node>
  <node id="155704" label="PRDM4" cy:nodeId="108021">
    <graphics y="-1330.2090680006963" z="0.0" x="359.3990702598718"/>
  </node>
  <node id="155714" label="COG2" cy:nodeId="105973">
    <graphics y="-1.498557746790084" z="0.0" x="-988.0999531776282"/>
  </node>
  <node id="155731" label="CHSY1" cy:nodeId="105717">
    <graphics y="-1727.4610821608526" z="0.0" x="-180.35004473036258"/>
  </node>
  <node id="155797" label="CAMTA2" cy:nodeId="111093">
    <graphics y="849.0271380539912" z="0.0" x="-49.95313310926883"/>
  </node>
  <node id="155700" label="FPGT" cy:nodeId="105976">
    <graphics y="-518.9745709303838" z="0.0" x="842.7229838340905"/>
  </node>
  <node id="155779" label="POMT2" cy:nodeId="108023">
    <graphics y="1459.0055773850459" z="0.0" x="-652.1340947181556"/>
  </node>
  <node id="155697" label="RORA" cy:nodeId="105977">
    <graphics y="-1523.4045025710088" z="0.0" x="872.5376200645593"/>
  </node>
  <node id="155740" label="SULF2" cy:nodeId="105979">
    <graphics y="-1746.9987408522588" z="0.0" x="511.66390180284054"/>
  </node>
  <node id="155811" label="BCAT1" cy:nodeId="105725">
    <graphics y="1009.607055961706" z="0.0" x="-664.9732441932532"/>
  </node>
  <node id="155719" label="AGA" cy:nodeId="114944">
    <graphics y="-2497.4339215163213" z="0.0" x="141.7051062553552"/>
  </node>
  <node id="155733" label="B3GNT9" cy:nodeId="108032">
    <graphics y="1677.6932299729365" z="0.0" x="-90.26582384413211"/>
  </node>
  <node id="155812" label="ALG10B" cy:nodeId="105727">
    <graphics y="1407.2382434006709" z="0.0" x="456.06558942491085"/>
  </node>
  <node id="155751" label="KLF10" cy:nodeId="111106">
    <graphics y="-801.4175907973272" z="0.0" x="-356.6013875038001"/>
  </node>
  <node id="155760" label="PIGW" cy:nodeId="105729">
    <graphics y="962.7222979661005" z="0.0" x="-279.95162153547733"/>
  </node>
  <node id="155763" label="UGCG" cy:nodeId="105985">
    <graphics y="-1079.322044074915" z="0.0" x="203.09947156602414"/>
  </node>
  <node id="155710" label="POLR3GL" cy:nodeId="114948">
    <graphics y="1487.815910636999" z="0.0" x="-144.9418950111243"/>
  </node>
  <node id="155787" label="SLC35E3" cy:nodeId="105732">
    <graphics y="-1018.5548169020635" z="0.0" x="462.1712870567468"/>
  </node>
  <node id="155694" label="SMC3" cy:nodeId="105990">
    <graphics y="14.095558464147416" z="0.0" x="-691.6432881385657"/>
  </node>
  <node id="155801" label="C17orf49" cy:nodeId="105736">
    <graphics y="1064.7759478684443" z="0.0" x="151.2464365928796"/>
  </node>
  <node id="155798" label="HYAL2" cy:nodeId="105737">
    <graphics y="1119.066627800085" z="0.0" x="48.93550824815304"/>
  </node>
  <node id="155808" label="GANAB" cy:nodeId="105998">
    <graphics y="1000.7944720383662" z="0.0" x="443.2324671714929"/>
  </node>
  <node id="155795" label="CBX4" cy:nodeId="105743">
    <graphics y="-1872.1283795241338" z="0.0" x="777.4693217247155"/>
  </node>
  <node id="155748" label="MAN2A2" cy:nodeId="105748">
    <graphics y="1677.6932299729365" z="0.0" x="-289.83264971083133"/>
  </node>
  <node id="155692" label="TAF1" cy:nodeId="106006">
    <graphics y="-242.45577210225883" z="0.0" x="919.6946024864343"/>
  </node>
  <node id="155761" label="COG1" cy:nodeId="106005">
    <graphics y="949.0271380539912" z="0.0" x="-508.8349385291907"/>
  </node>
  <node id="155788" label="CSNK2A1" cy:nodeId="108568">
    <graphics y="-720.4878384474737" z="0.0" x="549.9895548790124"/>
  </node>
  <node id="155695" label="HYAL1" cy:nodeId="105751">
    <graphics y="-1556.8492657546026" z="0.0" x="715.1894755333093"/>
  </node>
  <node id="155794" label="FUT2" cy:nodeId="107287">
    <graphics y="-1816.9303204421026" z="0.0" x="681.5694804161218"/>
  </node>
  <node id="155780" label="DOT1L" cy:nodeId="108570">
    <graphics y="1510.6898425217646" z="0.0" x="-745.9470906288001"/>
  </node>
  <node id="155800" label="B3GAT3" cy:nodeId="105754">
    <graphics y="1126.2335284348505" z="0.0" x="249.41947126084835"/>
  </node>
  <node id="155785" label="DAXX" cy:nodeId="108569">
    <graphics y="-1251.3259808424932" z="0.0" x="683.2451395958093"/>
  </node>
  <node id="155677" label="PAPSS1" cy:nodeId="107291">
    <graphics y="-65.88423889913383" z="0.0" x="526.6136393516687"/>
  </node>
  <node id="155737" label="DPM2" cy:nodeId="105758">
    <graphics y="1677.6932299729365" z="0.0" x="-688.9663014442298"/>
  </node>
  <node id="155776" label="GCNT2" cy:nodeId="107296">
    <graphics y="1568.3956530686396" z="0.0" x="-988.0999531776282"/>
  </node>
  <node id="155810" label="MAN1B1" cy:nodeId="105760">
    <graphics y="1096.5134728547114" z="0.0" x="-746.8453450233313"/>
  </node>
  <node id="155757" label="MOGS" cy:nodeId="105762">
    <graphics y="1124.1917498703974" z="0.0" x="-988.0999531776282"/>
  </node>
  <node id="155756" label="POMT1" cy:nodeId="105761">
    <graphics y="949.0271380539912" z="0.0" x="-947.4213032752845"/>
  </node>
  <node id="155706" label="ALG11" cy:nodeId="107300">
    <graphics y="246.53446227274117" z="0.0" x="-885.2049336463782"/>
  </node>
  <node id="155675" label="CHST12" cy:nodeId="105763">
    <graphics y="1677.6932299729365" z="0.0" x="-888.533127310929"/>
  </node>
  <node id="155718" label="SLC35A4" cy:nodeId="108586">
    <graphics y="-2197.335899055384" z="0.0" x="238.8578867881921"/>
  </node>
  <node id="155674" label="XRN2" cy:nodeId="106025">
    <graphics y="481.75223571024117" z="0.0" x="-309.95511675184696"/>
  </node>
  <node id="155755" label="HOXA6" cy:nodeId="107308">
    <graphics y="25.672218620397416" z="0.0" x="297.4795908897546"/>
  </node>
  <node id="155691" label="OGT" cy:nodeId="105771">
    <graphics y="-298.8092266921026" z="0.0" x="1026.320273873153"/>
  </node>
  <node id="155709" label="B3GALT4" cy:nodeId="106030">
    <graphics y="1407.2382434006709" z="0.0" x="-73.86431932753055"/>
  </node>
  <node id="155790" label="CHD4" cy:nodeId="105773">
    <graphics y="-135.38790100850883" z="0.0" x="-496.4589619666907"/>
  </node>
  <node id="155802" label="C1GALT1C1" cy:nodeId="106032">
    <graphics y="-135.97042053975883" z="0.0" x="1146.7469096153404"/>
  </node>
  <node id="155672" label="ZBTB33" cy:nodeId="106031">
    <graphics y="-15.879111946008834" z="0.0" x="1184.5893778770592"/>
  </node>
  <node id="155766" label="HBP1" cy:nodeId="108591">
    <graphics y="1407.2382434006709" z="0.0" x="168.28854322129757"/>
  </node>
  <node id="155720" label="B4GALT7" cy:nodeId="105782">
    <graphics y="-2507.1709820631963" z="0.0" x="296.7051005333093"/>
  </node>
  <node id="155749" label="KLF15" cy:nodeId="108597">
    <graphics y="1668.3956530686396" z="0.0" x="-389.39947557753055"/>
  </node>
  <node id="155745" label="LDB1" cy:nodeId="107320">
    <graphics y="-479.27437561788383" z="0.0" x="-210.93073320692508"/>
  </node>
  <node id="155789" label="CREB3" cy:nodeId="105786">
    <graphics y="562.2101214524287" z="0.0" x="-125.91626787489383"/>
  </node>
  <node id="155744" label="MLLT1" cy:nodeId="108601">
    <graphics y="-1942.7137066725713" z="0.0" x="-83.95162248915165"/>
  </node>
  <node id="155752" label="GALNT9" cy:nodeId="108605">
    <graphics y="1307.2382434006709" z="0.0" x="-608.8349385291907"/>
  </node>
  <node id="155723" label="POFUT1" cy:nodeId="105792">
    <graphics y="1568.3956530686396" z="0.0" x="-458.1700444251868"/>
  </node>
  <node id="155739" label="POFUT2" cy:nodeId="107327">
    <graphics y="-2040.9733502272588" z="0.0" x="493.16869306260617"/>
  </node>
  <node id="155786" label="COG7" cy:nodeId="105791">
    <graphics y="-397.2927471999151" z="0.0" x="606.3777689903405"/>
  </node>
  <node id="155783" label="HYAL3" cy:nodeId="113220">
    <graphics y="-1388.4391095046026" z="0.0" x="653.2066569297937"/>
  </node>
  <node id="155708" label="KHK" cy:nodeId="105800">
    <graphics y="1568.3956530686396" z="0.0" x="-216.01718187635868"/>
  </node>
  <node id="155673" label="DPM1" cy:nodeId="105799">
    <graphics y="600.1429827805537" z="0.0" x="-375.1847920448157"/>
  </node>
  <node id="155702" label="SLC35A2" cy:nodeId="107335">
    <graphics y="-1645.6802594069463" z="0.0" x="300.1002421348718"/>
  </node>
  <node id="155683" label="FUT1" cy:nodeId="105802">
    <graphics y="1668.3956530686396" z="0.0" x="9.734176155867885"/>
  </node>
  <node id="155753" label="HOXB6" cy:nodeId="128585">
    <graphics y="1211.4834673996943" z="0.0" x="-672.7037434608313"/>
  </node>
  <node id="155805" label="ST3GAL2" cy:nodeId="105806">
    <graphics y="-1716.9928204421026" z="0.0" x="1309.0512919395592"/>
  </node>
  <node id="155726" label="PCGF6" cy:nodeId="113232">
    <graphics y="969.8534777756709" z="0.0" x="-160.77300310438602"/>
  </node>
  <node id="155688" label="TAF7" cy:nodeId="108623">
    <graphics y="-1949.6624371413213" z="0.0" x="257.72598981553585"/>
  </node>
  <node id="155682" label="TFAM" cy:nodeId="113234">
    <graphics y="402.89444762430367" z="0.0" x="-114.11872148817508"/>
  </node>
  <node id="155680" label="TFE3" cy:nodeId="108625">
    <graphics y="1786.9908068772334" z="0.0" x="-688.9663014442298"/>
  </node>
  <node id="155820" label="AHR" cy:nodeId="106836">
    <graphics y="-2134.3077008131963" z="0.0" x="-391.06351518934696"/>
  </node>
  <node id="155768" label="PIGK" cy:nodeId="106835">
    <graphics y="-540.5818096999151" z="0.0" x="377.3989024131921"/>
  </node>
  <node id="155821" label="LAMP2" cy:nodeId="107350">
    <graphics y="-19.470176399133834" z="0.0" x="177.87062024766476"/>
  </node>
  <node id="155676" label="UBE2I" cy:nodeId="108629">
    <graphics y="1668.3956530686396" z="0.0" x="-988.0999531776282"/>
  </node>
  <node id="155689" label="TAF3" cy:nodeId="107351">
    <graphics y="38.761329948522416" z="0.0" x="-54.25144243544071"/>
  </node>
  <node id="155774" label="SLC35E1" cy:nodeId="106844">
    <graphics y="-1741.5013043288213" z="0.0" x="128.53908872300656"/>
  </node>
  <node id="155681" label="TFCP2" cy:nodeId="107355">
    <graphics y="-886.6815297011358" z="0.0" x="-239.10321855848758"/>
  </node>
  <node id="155762" label="HEXIM1" cy:nodeId="112221">
    <graphics y="955.5913088913935" z="0.0" x="-399.13025713270633"/>
  </node>
  <node id="155822" label="COG6" cy:nodeId="105824">
    <graphics y="-119.20491761007133" z="0.0" x="-118.05271196669071"/>
  </node>
  <node id="155732" label="NCAPG2" cy:nodeId="117858">
    <graphics y="-1745.7392193678838" z="0.0" x="-51.47016191786258"/>
  </node>
  <node id="155735" label="XYLT1" cy:nodeId="106854">
    <graphics y="-2140.999473274134" z="0.0" x="815.8764872520593"/>
  </node>
  <node id="155686" label="TCFL5" cy:nodeId="112232">
    <graphics y="1786.9908068772334" z="0.0" x="-888.533127310929"/>
  </node>
  <node id="155778" label="ERG" cy:nodeId="105832">
    <graphics y="1487.815910636999" z="0.0" x="-917.0246663123938"/>
  </node>
  <node id="155796" label="ALG2" cy:nodeId="109671">
    <graphics y="725.5633929368037" z="0.0" x="-80.3906483680579"/>
  </node>
  <node id="155696" label="ST3GAL5" cy:nodeId="106857">
    <graphics y="-1476.3504864577276" z="0.0" x="993.3358378379968"/>
  </node>
  <node id="155775" label="FUS" cy:nodeId="106862">
    <graphics y="-1647.05178040304" z="0.0" x="58.93209027940304"/>
  </node>
  <node id="155777" label="CHST15" cy:nodeId="106861">
    <graphics y="1407.2382434006709" z="0.0" x="-845.9470906288001"/>
  </node>
  <node id="155772" label="GPI" cy:nodeId="106864">
    <graphics y="1786.9908068772334" z="0.0" x="-489.39947557753055"/>
  </node>
  <node id="155773" label="GAPDH" cy:nodeId="106863">
    <graphics y="1777.6932299729365" z="0.0" x="-588.9663014442298"/>
  </node>
  <node id="155806" label="MGAT2" cy:nodeId="106868">
    <graphics y="-1713.9987408522588" z="0.0" x="920.6974101036218"/>
  </node>
  <node id="155759" label="HIF1A" cy:nodeId="106867">
    <graphics y="-356.2564007643682" z="0.0" x="-313.31839800184696"/>
  </node>
  <node id="155791" label="SLC35B4" cy:nodeId="105845">
    <graphics y="1487.815910636999" z="0.0" x="97.21096753770382"/>
  </node>
  <node id="155684" label="TEAD2" cy:nodeId="109690">
    <graphics y="1677.6932299729365" z="0.0" x="109.3010020225671"/>
  </node>
  <node id="155685" label="PIGG" cy:nodeId="109689">
    <graphics y="1777.6932299729365" z="0.0" x="-988.0999531776282"/>
  </node>
  <node id="155728" label="GNPNAT1" cy:nodeId="105855">
    <graphics y="-367.88692444600883" z="0.0" x="-676.8642354041907"/>
  </node>
  <node id="155703" label="GFPT1" cy:nodeId="106882">
    <graphics y="-1340.9109722975713" z="0.0" x="253.01676892930539"/>
  </node>
  <node id="155687" label="TBX3" cy:nodeId="116610">
    <graphics y="-1574.7452008131963" z="0.0" x="541.3599162071374"/>
  </node>
  <node id="155707" label="PPARA" cy:nodeId="106881">
    <graphics y="194.66849547586617" z="0.0" x="-748.9379048377845"/>
  </node>
  <node id="155771" label="GLYR1" cy:nodeId="105866">
    <graphics y="-430.52355164327446" z="0.0" x="358.09705304795773"/>
  </node>
  <node id="155770" label="ALG1" cy:nodeId="105867">
    <graphics y="-355.09175843038383" z="0.0" x="428.75313520127804"/>
  </node>
  <node id="155767" label="GTF2I" cy:nodeId="105871">
    <graphics y="-230.13735169210258" z="0.0" x="-99.75388384169071"/>
  </node>
  <node id="155815" label="PIGO" cy:nodeId="105874">
    <graphics y="316.27225524149117" z="0.0" x="-203.58362627333133"/>
  </node>
  <node id="155765" label="HCFC1" cy:nodeId="105873">
    <graphics y="214.37894469461617" z="0.0" x="-229.48279619520633"/>
  </node>
  <node id="155809" label="BCLAF1" cy:nodeId="126100">
    <graphics y="1052.478737175085" z="0.0" x="349.41947126084835"/>
  </node>
  <node id="155764" label="HECTD1" cy:nodeId="105875">
    <graphics y="-1096.2627484206182" z="0.0" x="93.83076810533078"/>
  </node>
  <node id="155758" label="HINFP" cy:nodeId="105877">
    <graphics y="1056.1098025437373" z="0.0" x="-889.4187092811438"/>
  </node>
  <node id="155799" label="TSTA3" cy:nodeId="105880">
    <graphics y="949.0271380539912" z="0.0" x="155.38501691514523"/>
  </node>
  <node id="155781" label="GM2A" cy:nodeId="105883">
    <graphics y="1668.3956530686396" z="0.0" x="209.3010020225671"/>
  </node>
  <node id="155729" label="MGAT5" cy:nodeId="105893">
    <graphics y="-485.8733136061651" z="0.0" x="-374.61124468153446"/>
  </node>
  <node id="155690" label="IDS" cy:nodeId="105922">
    <graphics y="-123.87697571554008" z="0.0" x="931.6353373497155"/>
  </node>
  <node id="155807" label="BCOR" cy:nodeId="110788">
    <graphics y="-1706.3458477858526" z="0.0" x="1143.069785591903"/>
  </node>
  <node id="155818" label="FUT8" cy:nodeId="107976">
    <graphics y="-2045.3594586256963" z="0.0" x="-264.61304521864383"/>
  </node>
  <node id="155792" label="CEBPG" cy:nodeId="110791">
    <graphics y="1568.3956530686396" z="0.0" x="26.135680672469448"/>
  </node>
  <node id="155782" label="DDIT3" cy:nodeId="110793">
    <graphics y="1677.6932299729365" z="0.0" x="308.8678278892663"/>
  </node>
  <node id="155804" label="BRD7" cy:nodeId="107977">
    <graphics y="-125.94387024679008" z="0.0" x="1316.5324931114342"/>
  </node>
  <node id="155722" label="PIGX" cy:nodeId="107980">
    <graphics y="1407.2382434006709" z="0.0" x="-316.0171818763587"/>
  </node>
  <node id="155741" label="MSX1" cy:nodeId="105932">
    <graphics y="-1910.3612896803838" z="0.0" x="494.5383830040124"/>
  </node>
  <node id="155736" label="MYBL1" cy:nodeId="105934">
    <graphics y="-2016.2309185866338" z="0.0" x="758.0535502403405"/>
  </node>
  <node id="155747" label="LARP7" cy:nodeId="110798">
    <graphics y="1677.6932299729365" z="0.0" x="-489.39947557753055"/>
  </node>
  <node id="155717" label="PITX1" cy:nodeId="123853">
    <graphics y="-1319.1822125319463" z="0.0" x="779.9136576622155"/>
  </node>
  <node id="155738" label="MXD3" cy:nodeId="105933">
    <graphics y="1668.3956530686396" z="0.0" x="-788.533127310929"/>
  </node>
  <node id="155754" label="HOXA7" cy:nodeId="110797">
    <graphics y="1407.2382434006709" z="0.0" x="-558.1700444251868"/>
  </node>
  <node id="155679" label="CTSA" cy:nodeId="107984">
    <graphics y="1777.6932299729365" z="0.0" x="-788.533127310929"/>
  </node>
  <node id="155742" label="MNT" cy:nodeId="110801">
    <graphics y="-1729.8468243483526" z="0.0" x="1433.7485575645592"/>
  </node>
  <node id="155734" label="MZF1" cy:nodeId="105942">
    <graphics y="1668.3956530686396" z="0.0" x="-189.83264971083133"/>
  </node>
  <node id="155828" label="AFF4" cy:nodeId="105686">
    <graphics y="-43.454246223352584" z="0.0" x="-219.7972188026282"/>
  </node>
  <node id="155746" label="ST6GALNAC5" cy:nodeId="107989">
    <graphics y="1668.3956530686396" z="0.0" x="-588.9663014442298"/>
  </node>
  <node id="155826" label="STT3B" cy:nodeId="105688">
    <graphics y="-11.091453254602584" z="0.0" x="-579.9267354041907"/>
  </node>
  <node id="155827" label="MAN1A2" cy:nodeId="105687">
    <graphics y="111.68204528055367" z="0.0" x="-173.37311601942508"/>
  </node>
  <node id="155712" label="FUT11" cy:nodeId="105690">
    <graphics y="-291.7750470046026" z="0.0" x="-12.962440970596958"/>
  </node>
  <node id="155727" label="NFYC" cy:nodeId="105946">
    <graphics y="949.0271380539912" z="0.0" x="537.1965174644616"/>
  </node>
  <node id="155730" label="NFIC" cy:nodeId="105945">
    <graphics y="-298.9717022780401" z="0.0" x="-560.0840840370032"/>
  </node>
  <node id="155825" label="NEU3" cy:nodeId="105689">
    <graphics y="-81.35396546163383" z="0.0" x="-390.8113789588782"/>
  </node>
  <node id="155693" label="SND1" cy:nodeId="110812">
    <graphics y="-1721.4952008131963" z="0.0" x="227.8646464317468"/>
  </node>
  <node id="155705" label="HS6ST1" cy:nodeId="107996">
    <graphics y="331.49466735086617" z="0.0" x="-772.431923392472"/>
  </node>
  <node id="155769" label="COG5" cy:nodeId="105692">
    <graphics y="-426.96627014913383" z="0.0" x="78.37213849717648"/>
  </node>
  <node id="155750" label="ACER2" cy:nodeId="105691">
    <graphics y="-757.2509076003057" z="0.0" x="-224.56119585340946"/>
  </node>
  <node id="155678" label="TOP1" cy:nodeId="110814">
    <graphics y="-158.41652649679008" z="0.0" x="438.7297892540124"/>
  </node>
  <node id="155824" label="MAN2A1" cy:nodeId="105694">
    <graphics y="-363.61959046163383" z="0.0" x="-196.4684834510657"/>
  </node>
  <node id="155816" label="SLC35A3" cy:nodeId="105695">
    <graphics y="-120.66591614522758" z="0.0" x="-272.28955889051883"/>
  </node>
  <node id="155711" label="GALNT10" cy:nodeId="105697">
    <graphics y="-686.1153790358526" z="0.0" x="-22.69767046278446"/>
  </node>
  <node id="155724" label="PHF20" cy:nodeId="105956">
    <graphics y="1487.815910636999" z="0.0" x="-387.0947575599524"/>
  </node>
  <node id="155823" label="SLC35A5" cy:nodeId="105702">
    <graphics y="104.74839049539742" z="0.0" x="-287.08631182020633"/>
  </node>
  <node id="155721" label="PHF6" cy:nodeId="105957">
    <graphics y="-2396.693320930384" z="0.0" x="226.0820307701257"/>
  </node>
  <node id="155817" label="ATF1" cy:nodeId="105701">
    <graphics y="89.68973571024117" z="0.0" x="-380.85025835340946"/>
  </node>
  <node id="155713" label="POLR3A" cy:nodeId="105960">
    <graphics y="-585.5762860182745" z="0.0" x="-78.85105181044071"/>
  </node>
  <node id="155784" label="DAD1" cy:nodeId="108008">
    <graphics y="-1209.4659039381963" z="0.0" x="793.2061381309655"/>
  </node>
  <node id="155698" label="GALNT4" cy:nodeId="105703">
    <graphics y="-1954.4787213210088" z="0.0" x="1125.819785591903"/>
  </node>
  <node id="155716" label="POLR2B" cy:nodeId="105959">
    <graphics y="-53.161521613977584" z="0.0" x="-850.439980033097"/>
  </node>
  <node id="155803" label="UGGT2" cy:nodeId="105966">
    <graphics y="-104.80361145772758" z="0.0" x="1440.4616923301842"/>
  </node>
  <node id="155814" label="ATF7IP" cy:nodeId="105710">
    <graphics y="1459.0055773850459" z="0.0" x="362.1015391319421"/>
  </node>
  <node id="155819" label="HAS2" cy:nodeId="105709">
    <graphics y="-2205.851035774134" z="0.0" x="-491.2814717323157"/>
  </node>
</graph>
