# Supplementary material for: A systems-based framework to computationally describe putative transcription factors and signaling pathways regulating glycan biosynthesis
Source: publisher site journal article supplement (doi:10.3762/bjoc.17.119), 2021-07-22
Supplement: Additional file 2 [file 1860-5397-17-119-S2.cys › CytoscapeSession-2021_03_21-12_01/views/159940-160556-BLCA.xgmml]

<?xml version="1.0" encoding="UTF-8" standalone="yes"?>
<graph id="160556" label="BLCA" cy:view="1" cy:networkId="159940" cy:visualStyle="default" cy:rendererId="org.cytoscape.ding" cy:documentVersion="3.0" xmlns:dc="http://purl.org/dc/elements/1.1/" xmlns:xlink="http://www.w3.org/1999/xlink" xmlns:rdf="http://www.w3.org/1999/02/22-rdf-syntax-ns#" xmlns:cy="http://www.cytoscape.org" xmlns="http://www.cs.rpi.edu/XGMML">
  <graphics>
    <att name="NETWORK_NODE_SELECTION" value="true" type="string" cy:type="String"/>
    <att name="NETWORK_CENTER_X_LOCATION" value="290.33697509765625" type="string" cy:type="String"/>
    <att name="NETWORK_HEIGHT" value="510.0" type="string" cy:type="String"/>
    <att name="NETWORK_TITLE" value="BLCA" type="string" cy:type="String"/>
    <att name="NETWORK_EDGE_SELECTION" value="true" type="string" cy:type="String"/>
    <att name="NETWORK_CENTER_Y_LOCATION" value="148.46240234375" type="string" cy:type="String"/>
    <att name="NETWORK_WIDTH" value="1312.0" type="string" cy:type="String"/>
    <att name="NETWORK_DEPTH" value="0.0" type="string" cy:type="String"/>
    <att name="NETWORK_SCALE_FACTOR" value="0.08305748539076048" type="string" cy:type="String"/>
    <att name="NETWORK_ANNOTATION_SELECTION" value="false" type="string" cy:type="String"/>
    <att name="NETWORK_CENTER_Z_LOCATION" value="0.0" type="string" cy:type="String"/>
  </graphics>
  <node id="160622" label="RBL2" cy:nodeId="105968">
    <graphics y="-377.5367423422099" z="0.0" x="395.7226091237808"/>
  </node>
  <node id="160620" label="REST" cy:nodeId="105970">
    <graphics y="-405.854514253831" z="0.0" x="-190.12785283605808"/>
  </node>
  <node id="160621" label="RCOR1" cy:nodeId="105969">
    <graphics y="-627.3163062460185" z="0.0" x="289.78138597924954"/>
  </node>
  <node id="160619" label="RFX5" cy:nodeId="105972">
    <graphics y="-108.05963815519817" z="0.0" x="238.4871660085464"/>
  </node>
  <node id="160655" label="PIGB" cy:nodeId="108020">
    <graphics y="-161.69014657804973" z="0.0" x="725.1961809011245"/>
  </node>
  <node id="160623" label="RBL1" cy:nodeId="108022">
    <graphics y="-599.3484717733622" z="0.0" x="-795.3998273996567"/>
  </node>
  <node id="160618" label="RFX7" cy:nodeId="105974">
    <graphics y="-309.3800002462626" z="0.0" x="567.3355851979995"/>
  </node>
  <node id="160628" label="PRDM4" cy:nodeId="108021">
    <graphics y="80.34000478913777" z="0.0" x="-344.638429084227"/>
  </node>
  <node id="160803" label="FPGT" cy:nodeId="105976">
    <graphics y="-665.6345740682841" z="0.0" x="220.22675951440579"/>
  </node>
  <node id="160616" label="RNF2" cy:nodeId="105975">
    <graphics y="-902.2044898397685" z="0.0" x="391.36439379174954"/>
  </node>
  <node id="160760" label="CREB3L2" cy:nodeId="111095">
    <graphics y="36.72730337312214" z="0.0" x="69.78239305932766"/>
  </node>
  <node id="160633" label="PIGA" cy:nodeId="108027">
    <graphics y="-1012.9655372030497" z="0.0" x="879.0036149831558"/>
  </node>
  <node id="160675" label="A4GNT" cy:nodeId="111099">
    <graphics y="-1085.1127539999247" z="0.0" x="332.74806078393704"/>
  </node>
  <node id="160732" label="SULF2" cy:nodeId="105979">
    <graphics y="1285.922097074294" z="0.0" x="-740.2002424387192"/>
  </node>
  <node id="160614" label="RUNX2" cy:nodeId="105981">
    <graphics y="1402.9185570352315" z="0.0" x="-770.4381574777817"/>
  </node>
  <node id="160610" label="SIN3A" cy:nodeId="105984">
    <graphics y="-329.98171438047893" z="0.0" x="326.91618212182766"/>
  </node>
  <node id="160586" label="TCF21" cy:nodeId="108031">
    <graphics y="2083.1680687539815" z="0.0" x="336.80189379174954"/>
  </node>
  <node id="160830" label="UGCG" cy:nodeId="105985">
    <graphics y="-292.1053477651835" z="0.0" x="-31.795701423094215"/>
  </node>
  <node id="160577" label="TFDP1" cy:nodeId="108036">
    <graphics y="-820.901389253831" z="0.0" x="-523.1592878488755"/>
  </node>
  <node id="160603" label="SMARCC2" cy:nodeId="105988">
    <graphics y="-567.0804511434794" z="0.0" x="836.0401750417495"/>
  </node>
  <node id="160601" label="SMC3" cy:nodeId="105990">
    <graphics y="-475.3349067098857" z="0.0" x="76.86375292260891"/>
  </node>
  <node id="160602" label="SMC1A" cy:nodeId="105989">
    <graphics y="-653.0456153280497" z="0.0" x="-55.121751227781715"/>
  </node>
  <node id="160766" label="GCNT1" cy:nodeId="108552">
    <graphics y="1043.491677152419" z="0.0" x="304.2663408132339"/>
  </node>
  <node id="160630" label="PRAME" cy:nodeId="111111">
    <graphics y="-1547.372824800706" z="0.0" x="-681.3809675363755"/>
  </node>
  <node id="160595" label="SRCAP" cy:nodeId="105994">
    <graphics y="2308.0037621133565" z="0.0" x="-220.17112103979343"/>
  </node>
  <node id="160838" label="GANAB" cy:nodeId="105998">
    <graphics y="-663.373068941331" z="0.0" x="-122.31134168188328"/>
  </node>
  <node id="160593" label="SSRP1" cy:nodeId="105997">
    <graphics y="-734.6966163046122" z="0.0" x="-460.90693799535984"/>
  </node>
  <node id="160592" label="STAT1" cy:nodeId="105999">
    <graphics y="750.210915433669" z="0.0" x="265.74430712182766"/>
  </node>
  <node id="160779" label="CEBPZ" cy:nodeId="108564">
    <graphics y="-1201.2259131796122" z="0.0" x="-51.55230847875828"/>
  </node>
  <node id="160590" label="STAT5A" cy:nodeId="106003">
    <graphics y="2308.0037621133565" z="0.0" x="-20.604295173094215"/>
  </node>
  <node id="160588" label="TAF1" cy:nodeId="106006">
    <graphics y="-507.78690255949505" z="0.0" x="400.64369066674954"/>
  </node>
  <node id="160757" label="CSNK2A1" cy:nodeId="108568">
    <graphics y="-413.39745248625286" z="0.0" x="-375.8315138010239"/>
  </node>
  <node id="160749" label="DR1" cy:nodeId="108571">
    <graphics y="6.26361929109089" z="0.0" x="-41.270066657469215"/>
  </node>
  <node id="160745" label="GUSB" cy:nodeId="108574">
    <graphics y="-1174.6812354452372" z="0.0" x="-899.8040632395005"/>
  </node>
  <node id="160584" label="TEAD1" cy:nodeId="106013">
    <graphics y="167.36548696687214" z="0.0" x="-172.00269786398167"/>
  </node>
  <node id="160580" label="TET2" cy:nodeId="106016">
    <graphics y="-394.0296851522685" z="0.0" x="514.5984636159683"/>
  </node>
  <node id="160581" label="TERF1" cy:nodeId="106015">
    <graphics y="-363.43141092131145" z="0.0" x="-38.61770764868015"/>
  </node>
  <node id="160796" label="PIGL" cy:nodeId="108578">
    <graphics y="-834.1893226034404" z="0.0" x="1221.2007585378433"/>
  </node>
  <node id="160573" label="TP63" cy:nodeId="106017">
    <graphics y="264.731911527419" z="0.0" x="1661.4573503347183"/>
  </node>
  <node id="160688" label="EXT1" cy:nodeId="108580">
    <graphics y="179.7269981973409" z="0.0" x="797.5254655690933"/>
  </node>
  <node id="160570" label="TTF2" cy:nodeId="106019">
    <graphics y="-801.133811128831" z="0.0" x="7.58091600854641"/>
  </node>
  <node id="160718" label="EZH2" cy:nodeId="108582">
    <graphics y="-805.8749610311747" z="0.0" x="-800.5338606027817"/>
  </node>
  <node id="160568" label="WDR5" cy:nodeId="106024">
    <graphics y="-2493.7943335897685" z="0.0" x="423.0474382253433"/>
  </node>
  <node id="160565" label="YAP1" cy:nodeId="106026">
    <graphics y="-166.36415780851848" z="0.0" x="53.106337151124535"/>
  </node>
  <node id="160566" label="XRN2" cy:nodeId="106025">
    <graphics y="-598.9208594686747" z="0.0" x="81.95292528589016"/>
  </node>
  <node id="160562" label="YY1" cy:nodeId="106028">
    <graphics y="-598.7254248983622" z="0.0" x="147.02265795190579"/>
  </node>
  <node id="160561" label="ZBTB17" cy:nodeId="106029">
    <graphics y="2325.9781120889425" z="0.0" x="-1216.7191633371567"/>
  </node>
  <node id="160559" label="C1GALT1C1" cy:nodeId="106032">
    <graphics y="-227.19480813810833" z="0.0" x="-326.78706494848484"/>
  </node>
  <node id="160560" label="ZBTB33" cy:nodeId="106031">
    <graphics y="-483.4291297323466" z="0.0" x="-57.29889051000828"/>
  </node>
  <node id="160693" label="HDAC6" cy:nodeId="108593">
    <graphics y="-1446.301291597581" z="0.0" x="820.5008684011245"/>
  </node>
  <node id="160657" label="MBD4" cy:nodeId="108599">
    <graphics y="-647.6928016073466" z="0.0" x="-591.1846174387192"/>
  </node>
  <node id="160645" label="NCAPG" cy:nodeId="108602">
    <graphics y="-920.3633643514872" z="0.0" x="-895.7294172434067"/>
  </node>
  <node id="160684" label="HOXA13" cy:nodeId="118332">
    <graphics y="-326.6967579252482" z="0.0" x="824.3747087331558"/>
  </node>
  <node id="160651" label="CHST5" cy:nodeId="108612">
    <graphics y="2308.0037621133565" z="0.0" x="178.962530693605"/>
  </node>
  <node id="160617" label="RING1" cy:nodeId="108613">
    <graphics y="2942.5120171182393" z="0.0" x="-621.1397794870591"/>
  </node>
  <node id="160612" label="SFMBT1" cy:nodeId="108615">
    <graphics y="-780.338156831956" z="0.0" x="-236.922234931395"/>
  </node>
  <node id="160598" label="SNAPC1" cy:nodeId="108618">
    <graphics y="-288.0759345419169" z="0.0" x="717.0796647878433"/>
  </node>
  <node id="160636" label="PBX3" cy:nodeId="113231">
    <graphics y="-1247.7609473592997" z="0.0" x="360.9020524831558"/>
  </node>
  <node id="160576" label="THAP1" cy:nodeId="108626">
    <graphics y="-48.52043832609661" z="0.0" x="320.3935075612808"/>
  </node>
  <node id="160785" label="C1GALT1" cy:nodeId="109670">
    <graphics y="-1033.0567237264872" z="0.0" x="213.85816820581204"/>
  </node>
  <node id="160792" label="UXS1" cy:nodeId="109669">
    <graphics y="465.17484365632527" z="0.0" x="-458.7567304758286"/>
  </node>
  <node id="160801" label="ALG2" cy:nodeId="109671">
    <graphics y="-81.56828988859661" z="0.0" x="-423.78270093481296"/>
  </node>
  <node id="160696" label="GLB1" cy:nodeId="109675">
    <graphics y="-227.24935830900677" z="0.0" x="460.9251237722183"/>
  </node>
  <node id="160666" label="LMNB1" cy:nodeId="109681">
    <graphics y="-1306.6950293905497" z="0.0" x="-301.4401106027817"/>
  </node>
  <node id="160600" label="SNAI2" cy:nodeId="109686">
    <graphics y="350.93302236726277" z="0.0" x="1027.3758073659683"/>
  </node>
  <node id="160641" label="NR1H2" cy:nodeId="109685">
    <graphics y="2308.0037621133565" z="0.0" x="-851.7171186594223"/>
  </node>
  <node id="160571" label="UGT1A9" cy:nodeId="109687">
    <graphics y="234.25229726960652" z="0.0" x="1797.3930192800308"/>
  </node>
  <node id="160804" label="PIGG" cy:nodeId="109689">
    <graphics y="-530.2980872518779" z="0.0" x="653.8712907644058"/>
  </node>
  <node id="160759" label="CREM" cy:nodeId="126103">
    <graphics y="1503.398903714919" z="0.0" x="-404.6288313059067"/>
  </node>
  <node id="160797" label="BTAF1" cy:nodeId="110789">
    <graphics y="-873.565207613206" z="0.0" x="1376.8483415456558"/>
  </node>
  <node id="160667" label="LARP7" cy:nodeId="110798">
    <graphics y="150.0293663614034" z="0.0" x="585.939467033937"/>
  </node>
  <node id="160769" label="FUT7" cy:nodeId="105685">
    <graphics y="1397.2742699258565" z="0.0" x="135.56452806909329"/>
  </node>
  <node id="160846" label="STT3B" cy:nodeId="105688">
    <graphics y="-572.7875129110575" z="0.0" x="28.68137987573391"/>
  </node>
  <node id="160829" label="MAN1A2" cy:nodeId="105687">
    <graphics y="-591.7317420370341" z="0.0" x="213.93839891870266"/>
  </node>
  <node id="160844" label="FUT11" cy:nodeId="105690">
    <graphics y="-310.2783185369731" z="0.0" x="67.62214525659329"/>
  </node>
  <node id="160827" label="NEU3" cy:nodeId="105689">
    <graphics y="-545.9584876425029" z="0.0" x="231.78419359643704"/>
  </node>
  <node id="160826" label="COG5" cy:nodeId="105692">
    <graphics y="-465.54402841398723" z="0.0" x="128.9443193288589"/>
  </node>
  <node id="160699" label="ACER2" cy:nodeId="105691">
    <graphics y="-1027.8002539999247" z="0.0" x="659.6771379323745"/>
  </node>
  <node id="160841" label="MAN2A1" cy:nodeId="105694">
    <graphics y="-445.04188455412395" z="0.0" x="228.05012377221829"/>
  </node>
  <node id="160842" label="SLC35F5" cy:nodeId="105696">
    <graphics y="-392.91136850187786" z="0.0" x="122.30100878198391"/>
  </node>
  <node id="160845" label="SLC35A3" cy:nodeId="105695">
    <graphics y="-658.2746497518779" z="0.0" x="52.56347521264797"/>
  </node>
  <node id="160582" label="GALNT10" cy:nodeId="105697">
    <graphics y="151.15305410554402" z="0.0" x="-67.8149351267075"/>
  </node>
  <node id="160849" label="RTF1" cy:nodeId="105700">
    <graphics y="-507.1819373495341" z="0.0" x="512.7471452565933"/>
  </node>
  <node id="160850" label="ARID2" cy:nodeId="105699">
    <graphics y="-467.84627450773723" z="0.0" x="878.2177263112808"/>
  </node>
  <node id="160847" label="SLC35A5" cy:nodeId="105702">
    <graphics y="-440.4122992880107" z="0.0" x="5.516127190187035"/>
  </node>
  <node id="160848" label="ATF1" cy:nodeId="105701">
    <graphics y="-528.443137300706" z="0.0" x="-109.89502851049656"/>
  </node>
  <node id="160819" label="GALNT4" cy:nodeId="105703">
    <graphics y="-301.2665835745097" z="0.0" x="404.02833422143704"/>
  </node>
  <node id="160815" label="UGGT1" cy:nodeId="105705">
    <graphics y="-622.1859046346904" z="0.0" x="-1.389695563719215"/>
  </node>
  <node id="160751" label="B3GNT5" cy:nodeId="105707">
    <graphics y="-532.049109590745" z="0.0" x="-502.74311963598484"/>
  </node>
  <node id="160834" label="ATRX" cy:nodeId="105712">
    <graphics y="-410.00624002287395" z="0.0" x="741.1868425222183"/>
  </node>
  <node id="160816" label="ALG10" cy:nodeId="105711">
    <graphics y="-679.3542395956279" z="0.0" x="-179.4479164270615"/>
  </node>
  <node id="160832" label="BACH1" cy:nodeId="105714">
    <graphics y="-218.4604026205302" z="0.0" x="17.241789421632348"/>
  </node>
  <node id="160676" label="FKTN" cy:nodeId="105713">
    <graphics y="-957.6379004842997" z="0.0" x="281.21925219018704"/>
  </node>
  <node id="160828" label="MAN1A1" cy:nodeId="105716">
    <graphics y="-390.465842378831" z="0.0" x="-103.57984296362156"/>
  </node>
  <node id="160831" label="CSGALNACT2" cy:nodeId="105715">
    <graphics y="558.8495262735128" z="0.0" x="-166.0623443512177"/>
  </node>
  <node id="160737" label="CHST11" cy:nodeId="105718">
    <graphics y="1252.277321683669" z="0.0" x="-561.9578413156723"/>
  </node>
  <node id="160836" label="CHSY1" cy:nodeId="105717">
    <graphics y="-184.05255807707317" z="0.0" x="137.03422411401516"/>
  </node>
  <node id="160740" label="GFPT2" cy:nodeId="105719">
    <graphics y="1052.5225609414815" z="0.0" x="-448.8059248117661"/>
  </node>
  <node id="160701" label="GRHL3" cy:nodeId="114938">
    <graphics y="-1210.7791968710185" z="0.0" x="933.5740495534683"/>
  </node>
  <node id="160762" label="DPM3" cy:nodeId="105722">
    <graphics y="2402.435082303786" z="0.0" x="-927.0035566477036"/>
  </node>
  <node id="160820" label="BMI1" cy:nodeId="105726">
    <graphics y="-555.3359443075419" z="0.0" x="336.4068437429214"/>
  </node>
  <node id="160822" label="BCAT1" cy:nodeId="105725">
    <graphics y="885.016335355544" z="0.0" x="-902.5064558176255"/>
  </node>
  <node id="160818" label="BRCA1" cy:nodeId="105728">
    <graphics y="-831.8925391561747" z="0.0" x="-307.08641187231296"/>
  </node>
  <node id="160805" label="ALG10B" cy:nodeId="105727">
    <graphics y="-730.9444495565654" z="0.0" x="264.16544969995266"/>
  </node>
  <node id="160727" label="PIGN" cy:nodeId="105730">
    <graphics y="-254.1956321127177" z="0.0" x="320.6206804128433"/>
  </node>
  <node id="160817" label="PIGW" cy:nodeId="105729">
    <graphics y="-874.7996436483622" z="0.0" x="-241.76299420873875"/>
  </node>
  <node id="160772" label="SLC35E3" cy:nodeId="105732">
    <graphics y="-358.59355462858684" z="0.0" x="-282.58428327123875"/>
  </node>
  <node id="160615" label="FAM20B" cy:nodeId="105731">
    <graphics y="-1153.2427588827372" z="0.0" x="503.12623461206204"/>
  </node>
  <node id="160809" label="BRD1" cy:nodeId="105733">
    <graphics y="-679.8583594686747" z="0.0" x="774.389662346437"/>
  </node>
  <node id="160746" label="PMM1" cy:nodeId="105735">
    <graphics y="-1050.3490821249247" z="0.0" x="-971.6078352121567"/>
  </node>
  <node id="160795" label="CASP8AP2" cy:nodeId="105738">
    <graphics y="-998.0424414999247" z="0.0" x="477.3476091237808"/>
  </node>
  <node id="160599" label="GALNS" cy:nodeId="105740">
    <graphics y="475.9417503946065" z="0.0" x="1129.1880632253433"/>
  </node>
  <node id="160806" label="BRD2" cy:nodeId="107276">
    <graphics y="-647.8735877401591" z="0.0" x="377.89076097924954"/>
  </node>
  <node id="160794" label="CBX3" cy:nodeId="105741">
    <graphics y="-1341.8918067342997" z="0.0" x="-181.03667489568943"/>
  </node>
  <node id="160802" label="BRD3" cy:nodeId="107277">
    <graphics y="-294.6886092550517" z="0.0" x="-179.4815782694077"/>
  </node>
  <node id="160763" label="RFNG" cy:nodeId="105744">
    <graphics y="2718.686547147536" z="0.0" x="-1006.6309980539536"/>
  </node>
  <node id="160824" label="B4GALT5" cy:nodeId="107279">
    <graphics y="14.15253530671589" z="0.0" x="214.0471025319839"/>
  </node>
  <node id="160752" label="SLC35B3" cy:nodeId="107281">
    <graphics y="-345.2829657919169" z="0.0" x="-609.6613325266098"/>
  </node>
  <node id="160798" label="MAN2A2" cy:nodeId="105748">
    <graphics y="-1175.3993750936747" z="0.0" x="649.2371354909683"/>
  </node>
  <node id="160681" label="IDUA" cy:nodeId="105749">
    <graphics y="2841.605004178786" z="0.0" x="-695.8753523020005"/>
  </node>
  <node id="160791" label="CBX8" cy:nodeId="105752">
    <graphics y="2308.0037621133565" z="0.0" x="378.5293565603042"/>
  </node>
  <node id="160659" label="B3GAT3" cy:nodeId="105754">
    <graphics y="2921.7969597451925" z="0.0" x="-1195.4181379465317"/>
  </node>
  <node id="160747" label="GALK1" cy:nodeId="105753">
    <graphics y="-1178.6920997030497" z="0.0" x="-1067.6734480051255"/>
  </node>
  <node id="160722" label="ERCC3" cy:nodeId="107292">
    <graphics y="-845.929221285081" z="0.0" x="501.13734301049954"/>
  </node>
  <node id="160787" label="CDK8" cy:nodeId="105756">
    <graphics y="-649.1087561971904" z="0.0" x="108.27677782495266"/>
  </node>
  <node id="160783" label="DPM2" cy:nodeId="105758">
    <graphics y="-2702.0479956991435" z="0.0" x="475.3699479909683"/>
  </node>
  <node id="160579" label="TET3" cy:nodeId="118045">
    <graphics y="-1484.071799410081" z="0.0" x="-798.5555891184067"/>
  </node>
  <node id="160606" label="HK1" cy:nodeId="107293">
    <graphics y="239.51737295320027" z="0.0" x="1099.4756608815933"/>
  </node>
  <node id="160784" label="CDK9" cy:nodeId="105757">
    <graphics y="-2685.2413550741435" z="0.0" x="586.8455949636245"/>
  </node>
  <node id="160778" label="CENPA" cy:nodeId="160033">
    <graphics y="-1007.5020362264872" z="0.0" x="-458.8902753977036"/>
  </node>
  <node id="160782" label="MAN1B1" cy:nodeId="105760">
    <graphics y="-2576.4666968710185" z="0.0" x="537.9840226979995"/>
  </node>
  <node id="160660" label="PIGQ" cy:nodeId="105759">
    <graphics y="2893.07027517488" z="0.0" x="-940.3363813547348"/>
  </node>
  <node id="160716" label="FOSL2" cy:nodeId="107295">
    <graphics y="-210.4103766805888" z="0.0" x="-73.29630414526218"/>
  </node>
  <node id="160583" label="GNE" cy:nodeId="107297">
    <graphics y="327.68082510163777" z="0.0" x="-261.13143292944187"/>
  </node>
  <node id="160685" label="POMT1" cy:nodeId="105761">
    <graphics y="-2184.4054175741435" z="0.0" x="329.6842790456558"/>
  </node>
  <node id="160694" label="ALG11" cy:nodeId="107300">
    <graphics y="-1107.524436128831" z="0.0" x="62.43975695092922"/>
  </node>
  <node id="160781" label="CEBPA" cy:nodeId="105764">
    <graphics y="2308.0037621133565" z="0.0" x="578.0961824270034"/>
  </node>
  <node id="160664" label="MFNG" cy:nodeId="105766">
    <graphics y="1913.6219261758565" z="0.0" x="293.5497575612808"/>
  </node>
  <node id="160780" label="NAGK" cy:nodeId="105765">
    <graphics y="2317.3013390176534" z="0.0" x="677.6630082937027"/>
  </node>
  <node id="160774" label="CHD2" cy:nodeId="105770">
    <graphics y="-775.791037691331" z="0.0" x="591.560316643312"/>
  </node>
  <node id="160775" label="CHD1" cy:nodeId="105769">
    <graphics y="-598.9509192831279" z="0.0" x="563.0926652761245"/>
  </node>
  <node id="160720" label="NDST2" cy:nodeId="105772">
    <graphics y="-198.9965354330302" z="0.0" x="565.2011247487808"/>
  </node>
  <node id="160808" label="OGT" cy:nodeId="105771">
    <graphics y="-772.4178992635966" z="0.0" x="702.7430559011245"/>
  </node>
  <node id="160771" label="CHD8" cy:nodeId="105774">
    <graphics y="-512.7415839559794" z="0.0" x="17.796949944093285"/>
  </node>
  <node id="160611" label="GBA" cy:nodeId="107309">
    <graphics y="-1117.3369971639872" z="0.0" x="-348.8152479318833"/>
  </node>
  <node id="160773" label="CHD4" cy:nodeId="105773">
    <graphics y="-185.8790046102763" z="0.0" x="-559.7741254953598"/>
  </node>
  <node id="160677" label="KAT2B" cy:nodeId="107312">
    <graphics y="-754.7264319784404" z="0.0" x="177.0120683522964"/>
  </node>
  <node id="160768" label="LAMP3" cy:nodeId="105776">
    <graphics y="1385.3191918008565" z="0.0" x="402.4240251394058"/>
  </node>
  <node id="160770" label="CIITA" cy:nodeId="105775">
    <graphics y="1302.392556058669" z="0.0" x="281.6941667409683"/>
  </node>
  <node id="160674" label="KDM2B" cy:nodeId="107313">
    <graphics y="-1331.2083350546122" z="0.0" x="722.2552629323745"/>
  </node>
  <node id="160670" label="KLF11" cy:nodeId="107316">
    <graphics y="-651.6616736776591" z="0.0" x="-375.97932569067234"/>
  </node>
  <node id="160765" label="CPSF3L" cy:nodeId="105780">
    <graphics y="2512.4399803750753" z="0.0" x="-1025.0186933664536"/>
  </node>
  <node id="160668" label="KLF5" cy:nodeId="107318">
    <graphics y="65.19922720124714" z="0.0" x="444.25379808862454"/>
  </node>
  <node id="160669" label="KLF4" cy:nodeId="107317">
    <graphics y="-70.12874521086223" z="0.0" x="-269.2170805124497"/>
  </node>
  <node id="160764" label="B3GALT6" cy:nodeId="105781">
    <graphics y="2412.8182991616964" z="0.0" x="-1134.1426252512192"/>
  </node>
  <node id="160790" label="B4GALNT4" cy:nodeId="105784">
    <graphics y="2317.3013390176534" z="0.0" x="478.09618242700344"/>
  </node>
  <node id="160761" label="CREB3" cy:nodeId="105786">
    <graphics y="-1161.897971285081" z="0.0" x="-168.26700119058842"/>
  </node>
  <node id="160653" label="MED12" cy:nodeId="107324">
    <graphics y="-659.2416297323466" z="0.0" x="513.1286149831558"/>
  </node>
  <node id="160661" label="MBD3" cy:nodeId="107323">
    <graphics y="2893.4072807901143" z="0.0" x="-1065.1711897043442"/>
  </node>
  <node id="160712" label="B4GALT3" cy:nodeId="105789">
    <graphics y="-1361.595725191331" z="0.0" x="-649.6411909250473"/>
  </node>
  <node id="160697" label="POFUT1" cy:nodeId="105792">
    <graphics y="-772.3332435018779" z="0.0" x="82.93279894311672"/>
  </node>
  <node id="160758" label="PAPSS2" cy:nodeId="107328">
    <graphics y="1280.163063871169" z="0.0" x="-378.13826123754734"/>
  </node>
  <node id="160594" label="COG7" cy:nodeId="105791">
    <graphics y="2317.3013390176534" z="0.0" x="-120.60429517309421"/>
  </node>
  <node id="160692" label="POFUT2" cy:nodeId="107327">
    <graphics y="-1583.3514624960185" z="0.0" x="913.4564958425308"/>
  </node>
  <node id="160756" label="CTNNB1" cy:nodeId="105794">
    <graphics y="-405.96407235929973" z="0.0" x="64.16102465112454"/>
  </node>
  <node id="160644" label="NFYA" cy:nodeId="107329">
    <graphics y="-756.7071753866435" z="0.0" x="462.81947191674954"/>
  </node>
  <node id="160748" label="E2F1" cy:nodeId="105796">
    <graphics y="-1021.251242769456" z="0.0" x="-764.095689216063"/>
  </node>
  <node id="160753" label="DEK" cy:nodeId="105795">
    <graphics y="-491.6893531210185" z="0.0" x="-306.9983381418442"/>
  </node>
  <node id="160634" label="PHF8" cy:nodeId="107334">
    <graphics y="-913.7347022421122" z="0.0" x="682.5175309987808"/>
  </node>
  <node id="160812" label="SLC35B1" cy:nodeId="105798">
    <graphics y="-1004.742453706956" z="0.0" x="-550.8748029855942"/>
  </node>
  <node id="160777" label="KHK" cy:nodeId="105800">
    <graphics y="-1084.412131441331" z="0.0" x="-671.0766157297348"/>
  </node>
  <node id="160776" label="SLC35A2" cy:nodeId="107335">
    <graphics y="-970.9694434530497" z="0.0" x="-340.97818128149265"/>
  </node>
  <node id="160837" label="DPM1" cy:nodeId="105799">
    <graphics y="-789.175315035081" z="0.0" x="-589.1871503977036"/>
  </node>
  <node id="160613" label="RYBP" cy:nodeId="107338">
    <graphics y="-526.7908393270732" z="0.0" x="-402.5403761057114"/>
  </node>
  <node id="160742" label="E2F7" cy:nodeId="105803">
    <graphics y="-871.7918921835185" z="0.0" x="44.63029344995266"/>
  </node>
  <node id="160607" label="SMAD3" cy:nodeId="107342">
    <graphics y="83.42994009187214" z="0.0" x="1131.9501481862808"/>
  </node>
  <node id="160821" label="ST3GAL2" cy:nodeId="105806">
    <graphics y="934.6441429727315" z="0.0" x="-757.5716413645005"/>
  </node>
  <node id="160585" label="CSGALNACT1" cy:nodeId="105805">
    <graphics y="2208.0037621133565" z="0.0" x="368.47205980737454"/>
  </node>
  <node id="160604" label="SMARCC1" cy:nodeId="107344">
    <graphics y="-839.282248628831" z="0.0" x="124.72578295190579"/>
  </node>
  <node id="160597" label="SP2" cy:nodeId="107346">
    <graphics y="-727.7332679159404" z="0.0" x="-62.312425055906715"/>
  </node>
  <node id="160734" label="TPST1" cy:nodeId="105809">
    <graphics y="1023.140847074294" z="0.0" x="-535.2992414621567"/>
  </node>
  <node id="160731" label="ST3GAL6" cy:nodeId="105811">
    <graphics y="1408.3025902383565" z="0.0" x="-561.1297163156723"/>
  </node>
  <node id="160786" label="PIGK" cy:nodeId="106835">
    <graphics y="-581.1361304647685" z="0.0" x="-62.4280714182114"/>
  </node>
  <node id="160825" label="B3GNT2" cy:nodeId="106838">
    <graphics y="31.26612173249714" z="0.0" x="-167.69217879454845"/>
  </node>
  <node id="160839" label="LAMP2" cy:nodeId="107350">
    <graphics y="-205.70477212736614" z="0.0" x="-191.6464265970444"/>
  </node>
  <node id="160741" label="EGR2" cy:nodeId="105816">
    <graphics y="1144.746559964919" z="0.0" x="-510.3631757883286"/>
  </node>
  <node id="160587" label="TAF3" cy:nodeId="107351">
    <graphics y="-441.8296653158427" z="0.0" x="-490.98607007543796"/>
  </node>
  <node id="160589" label="ST6GALNAC4" cy:nodeId="106839">
    <graphics y="2317.3013390176534" z="0.0" x="78.962530693605"/>
  </node>
  <node id="160646" label="ST6GALNAC3" cy:nodeId="105815">
    <graphics y="887.9942406289815" z="0.0" x="-254.19674054662937"/>
  </node>
  <node id="160578" label="TFAP2C" cy:nodeId="107354">
    <graphics y="-743.5298377401591" z="0.0" x="-900.780503669188"/>
  </node>
  <node id="160703" label="HPSE2" cy:nodeId="105817">
    <graphics y="945.149147855544" z="0.0" x="-388.2210859445786"/>
  </node>
  <node id="160569" label="VDR" cy:nodeId="107356">
    <graphics y="236.74753652741902" z="0.0" x="965.0303483815933"/>
  </node>
  <node id="160717" label="UAP1" cy:nodeId="105820">
    <graphics y="-697.0700293905497" z="0.0" x="-699.5891584543442"/>
  </node>
  <node id="160799" label="SLC35E1" cy:nodeId="106844">
    <graphics y="-713.8803016073466" z="0.0" x="112.30308397729641"/>
  </node>
  <node id="160730" label="EHF" cy:nodeId="105819">
    <graphics y="-606.0767737753154" z="0.0" x="-138.5009931711411"/>
  </node>
  <node id="160800" label="BRD4" cy:nodeId="106843">
    <graphics y="-816.8236304647685" z="0.0" x="233.70851000268704"/>
  </node>
  <node id="160729" label="ELF1" cy:nodeId="105822">
    <graphics y="-386.68890298674114" z="0.0" x="267.3553300710464"/>
  </node>
  <node id="160755" label="COG6" cy:nodeId="105824">
    <graphics y="-359.6589919454814" z="0.0" x="217.32527025659329"/>
  </node>
  <node id="160789" label="CDK12" cy:nodeId="106848">
    <graphics y="-890.9884253866435" z="0.0" x="-57.988030829832496"/>
  </node>
  <node id="160728" label="COG3" cy:nodeId="105823">
    <graphics y="-559.9563514120341" z="0.0" x="462.50916918237454"/>
  </node>
  <node id="160793" label="CBX6" cy:nodeId="106847">
    <graphics y="698.4260643594503" z="0.0" x="-649.9204878000473"/>
  </node>
  <node id="160725" label="ELK3" cy:nodeId="105826">
    <graphics y="-64.55187143156536" z="0.0" x="104.60163744409329"/>
  </node>
  <node id="160754" label="DCP1A" cy:nodeId="106850">
    <graphics y="-574.1521979696513" z="0.0" x="-312.047608771727"/>
  </node>
  <node id="160721" label="ERCC6" cy:nodeId="105830">
    <graphics y="-297.5302840597392" z="0.0" x="264.32365282495266"/>
  </node>
  <node id="160724" label="EP400" cy:nodeId="105829">
    <graphics y="-425.3295432455302" z="0.0" x="320.07130297143704"/>
  </node>
  <node id="160708" label="ST6GAL1" cy:nodeId="106855">
    <graphics y="1098.709206449294" z="0.0" x="-133.3476728586411"/>
  </node>
  <node id="160709" label="ST8SIA4" cy:nodeId="105834">
    <graphics y="1292.843727933669" z="0.0" x="3.8460679860854725"/>
  </node>
  <node id="160572" label="ST3GAL5" cy:nodeId="106857">
    <graphics y="374.35233389070027" z="0.0" x="1747.5434099050308"/>
  </node>
  <node id="160738" label="CHSY3" cy:nodeId="105833">
    <graphics y="1139.5403832071065" z="0.0" x="-685.3313459543442"/>
  </node>
  <node id="160700" label="MGAT4A" cy:nodeId="106860">
    <graphics y="-1302.9540015585185" z="0.0" x="1081.7136979909683"/>
  </node>
  <node id="160726" label="GALNT7" cy:nodeId="106859">
    <graphics y="-66.56279672453411" z="0.0" x="454.2891374440933"/>
  </node>
  <node id="160735" label="CHST15" cy:nodeId="106861">
    <graphics y="1333.030251371169" z="0.0" x="-634.0330671457505"/>
  </node>
  <node id="160705" label="GPI" cy:nodeId="106864">
    <graphics y="3130.4244011514425" z="0.0" x="-1216.7191633371567"/>
  </node>
  <node id="160706" label="GAPDH" cy:nodeId="106863">
    <graphics y="3139.7219780557393" z="0.0" x="-1117.1523374704575"/>
  </node>
  <node id="160719" label="ETS1" cy:nodeId="105839">
    <graphics y="1017.428933011794" z="0.0" x="-909.2147077707505"/>
  </node>
  <node id="160736" label="HS3ST3B1" cy:nodeId="105841">
    <graphics y="1257.216042386794" z="0.0" x="-274.4309553293442"/>
  </node>
  <node id="160833" label="MGAT2" cy:nodeId="106868">
    <graphics y="-431.70838846037395" z="0.0" x="435.24330004174954"/>
  </node>
  <node id="160690" label="HIF1A" cy:nodeId="106867">
    <graphics y="-162.04427255461223" z="0.0" x="319.5811601491714"/>
  </node>
  <node id="160609" label="GALC" cy:nodeId="106869">
    <graphics y="-212.30123819181927" z="0.0" x="234.18116625268704"/>
  </node>
  <node id="160679" label="IRF3" cy:nodeId="106872">
    <graphics y="2688.023445951247" z="0.0" x="-1118.941880622313"/>
  </node>
  <node id="160714" label="FOXA1" cy:nodeId="105850">
    <graphics y="-56.48924936125286" z="0.0" x="627.3799577565933"/>
  </node>
  <node id="160840" label="GLCE" cy:nodeId="105851">
    <graphics y="-685.7941810018779" z="0.0" x="-264.51670972387546"/>
  </node>
  <node id="160650" label="MEIS3" cy:nodeId="106878">
    <graphics y="1438.5833519571065" z="0.0" x="-288.8354658273911"/>
  </node>
  <node id="160835" label="RPN2" cy:nodeId="105854">
    <graphics y="-767.8272925741435" z="0.0" x="-369.3636182932114"/>
  </node>
  <node id="160652" label="MEF2B" cy:nodeId="106877">
    <graphics y="2317.3013390176534" z="0.0" x="278.5293565603042"/>
  </node>
  <node id="160713" label="FOXM1" cy:nodeId="105853">
    <graphics y="-924.3790503866435" z="0.0" x="-397.2516035227036"/>
  </node>
  <node id="160810" label="ALG6" cy:nodeId="106879">
    <graphics y="-1152.8224097616435" z="0.0" x="-473.7224592355942"/>
  </node>
  <node id="160813" label="GNPNAT1" cy:nodeId="105855">
    <graphics y="-1031.8776465780497" z="0.0" x="-176.2786564020371"/>
  </node>
  <node id="160710" label="FOXP3" cy:nodeId="105858">
    <graphics y="1173.7374046914815" z="0.0" x="-21.519990363523902"/>
  </node>
  <node id="160823" label="GFPT1" cy:nodeId="106882">
    <graphics y="-514.9016028768779" z="0.0" x="-172.81084577123875"/>
  </node>
  <node id="160739" label="SULF1" cy:nodeId="106883">
    <graphics y="1176.158669339919" z="0.0" x="-422.10896436254734"/>
  </node>
  <node id="160767" label="HK3" cy:nodeId="105859">
    <graphics y="1432.8714378946065" z="0.0" x="224.11451586206204"/>
  </node>
  <node id="160704" label="GATA6" cy:nodeId="105862">
    <graphics y="1017.3179710977315" z="0.0" x="-321.7639631418442"/>
  </node>
  <node id="160608" label="SIRT6" cy:nodeId="106885">
    <graphics y="2805.0172051065206" z="0.0" x="-858.1690229562973"/>
  </node>
  <node id="160707" label="GABPA" cy:nodeId="105861">
    <graphics y="-810.3508216268779" z="0.0" x="305.6756425710464"/>
  </node>
  <node id="160807" label="ALG13" cy:nodeId="105864">
    <graphics y="-633.443137300706" z="0.0" x="693.783949455812"/>
  </node>
  <node id="160702" label="GATAD1" cy:nodeId="105863">
    <graphics y="-769.1102210409404" z="0.0" x="953.1347184987808"/>
  </node>
  <node id="160575" label="THAP11" cy:nodeId="106890">
    <graphics y="2504.1991356485128" z="0.0" x="-374.9237455515122"/>
  </node>
  <node id="160743" label="COG4" cy:nodeId="106892">
    <graphics y="2402.8369530313253" z="0.0" x="-433.73923627416843"/>
  </node>
  <node id="160574" label="COG8" cy:nodeId="106891">
    <graphics y="2598.557869779372" z="0.0" x="-320.17112103979343"/>
  </node>
  <node id="160564" label="CTBS" cy:nodeId="105869">
    <graphics y="157.95597158601277" z="0.0" x="172.25929125268704"/>
  </node>
  <node id="160626" label="STT3A" cy:nodeId="106893">
    <graphics y="-636.0820838339091" z="0.0" x="-493.4839033273911"/>
  </node>
  <node id="160698" label="GTF2I" cy:nodeId="105871">
    <graphics y="-535.94974435637" z="0.0" x="82.47523363549954"/>
  </node>
  <node id="160788" label="PIGO" cy:nodeId="105874">
    <graphics y="-811.220481050706" z="0.0" x="-76.78525678198093"/>
  </node>
  <node id="160695" label="HCFC1" cy:nodeId="105873">
    <graphics y="-723.8427649862529" z="0.0" x="20.646055779054223"/>
  </node>
  <node id="160691" label="HECTD1" cy:nodeId="105875">
    <graphics y="-103.52168954679973" z="0.0" x="-31.251069465086402"/>
  </node>
  <node id="160686" label="DPAGT1" cy:nodeId="105878">
    <graphics y="-1358.323752535081" z="0.0" x="113.41761644799954"/>
  </node>
  <node id="160687" label="HINFP" cy:nodeId="105877">
    <graphics y="-1823.764670503831" z="0.0" x="226.43788011987454"/>
  </node>
  <node id="160658" label="GPAA1" cy:nodeId="105881">
    <graphics y="3030.4244011514425" z="0.0" x="-1080.2457746652817"/>
  </node>
  <node id="160591" label="LIPA" cy:nodeId="105884">
    <graphics y="387.646950589919" z="0.0" x="182.23881395776516"/>
  </node>
  <node id="160682" label="INTS3" cy:nodeId="105886">
    <graphics y="2779.235619413161" z="0.0" x="-588.7657102731919"/>
  </node>
  <node id="160683" label="INO80" cy:nodeId="105885">
    <graphics y="-435.9006415731669" z="0.0" x="598.4734636159683"/>
  </node>
  <node id="160680" label="IRF1" cy:nodeId="105887">
    <graphics y="1482.929665433669" z="0.0" x="357.77039965112454"/>
  </node>
  <node id="160678" label="JMJD6" cy:nodeId="105894">
    <graphics y="-1254.610129488206" z="0.0" x="-1216.7191633371567"/>
  </node>
  <node id="160715" label="MGAT5" cy:nodeId="105893">
    <graphics y="-120.09004892179973" z="0.0" x="-138.04015676061863"/>
  </node>
  <node id="160663" label="GBGT1" cy:nodeId="105897">
    <graphics y="1740.6753929727315" z="0.0" x="339.53199633081204"/>
  </node>
  <node id="160711" label="GNB1" cy:nodeId="105902">
    <graphics y="-1007.3922950155497" z="0.0" x="-260.42595807592625"/>
  </node>
  <node id="160672" label="KDM5A" cy:nodeId="105904">
    <graphics y="-529.4064704305888" z="0.0" x="137.27747972924954"/>
  </node>
  <node id="160843" label="HS2ST1" cy:nodeId="105906">
    <graphics y="-926.1870948202372" z="0.0" x="-168.39926461260075"/>
  </node>
  <node id="160723" label="B3GALNT2" cy:nodeId="105908">
    <graphics y="-296.7870341665507" z="0.0" x="199.2131181569839"/>
  </node>
  <node id="160671" label="KDM5B" cy:nodeId="105907">
    <graphics y="-503.39713205168255" z="0.0" x="288.91029222924954"/>
  </node>
  <node id="160665" label="LYL1" cy:nodeId="105911">
    <graphics y="1658.390602933669" z="0.0" x="230.09077318628079"/>
  </node>
  <node id="160662" label="CHST13" cy:nodeId="105913">
    <graphics y="1776.4092796914815" z="0.0" x="164.54176195581204"/>
  </node>
  <node id="160567" label="B4GALT2" cy:nodeId="105917">
    <graphics y="-2563.7740699178935" z="0.0" x="328.6459489675308"/>
  </node>
  <node id="160656" label="MECOM" cy:nodeId="105919">
    <graphics y="-79.53845895597942" z="0.0" x="919.3416276784683"/>
  </node>
  <node id="160654" label="MED1" cy:nodeId="105924">
    <graphics y="-837.7686988241435" z="0.0" x="-163.7719160703873"/>
  </node>
  <node id="160596" label="NEU1" cy:nodeId="107971">
    <graphics y="-1083.1778174764872" z="0.0" x="-67.59795514623875"/>
  </node>
  <node id="160814" label="PIGX" cy:nodeId="107980">
    <graphics y="-876.8026343710185" z="0.0" x="-451.94200269262546"/>
  </node>
  <node id="160649" label="MRE11A" cy:nodeId="105931">
    <graphics y="-990.2897559530497" z="0.0" x="99.21751268823391"/>
  </node>
  <node id="160811" label="RPN1" cy:nodeId="105936">
    <graphics y="-877.319113863206" z="0.0" x="-644.3023847727036"/>
  </node>
  <node id="160648" label="MYBL2" cy:nodeId="105935">
    <graphics y="-948.7935401327372" z="0.0" x="-619.5289167551255"/>
  </node>
  <node id="160647" label="MYH11" cy:nodeId="105937">
    <graphics y="1078.883522855544" z="0.0" x="-369.93203870336765"/>
  </node>
  <node id="160744" label="E2F4" cy:nodeId="107987">
    <graphics y="2308.0037621133565" z="0.0" x="-488.76571027319187"/>
  </node>
  <node id="160605" label="HAS3" cy:nodeId="105941">
    <graphics y="184.44870840241902" z="0.0" x="1435.6773210378433"/>
  </node>
  <node id="160733" label="ST6GALNAC5" cy:nodeId="107989">
    <graphics y="1136.1719750039815" z="0.0" x="-322.73396436254734"/>
  </node>
  <node id="160642" label="NPAT" cy:nodeId="105948">
    <graphics y="-982.3077613241435" z="0.0" x="-14.234483161375465"/>
  </node>
  <node id="160643" label="NIPBL" cy:nodeId="105947">
    <graphics y="-421.9510489828349" z="0.0" x="172.43885668237454"/>
  </node>
  <node id="160689" label="SLC35D1" cy:nodeId="105950">
    <graphics y="-170.92677987883098" z="0.0" x="398.00562914331204"/>
  </node>
  <node id="160640" label="NR2C2" cy:nodeId="105949">
    <graphics y="-719.9927894003154" z="0.0" x="337.3328691335464"/>
  </node>
  <node id="160673" label="KDM4C" cy:nodeId="107997">
    <graphics y="-903.3275977499247" z="0.0" x="167.39237841089016"/>
  </node>
  <node id="160750" label="GALNT3" cy:nodeId="108000">
    <graphics y="-486.2020331747294" z="0.0" x="-696.4231428293442"/>
  </node>
  <node id="160639" label="NR2F1" cy:nodeId="105951">
    <graphics y="733.5921410196065" z="0.0" x="-204.18432752172703"/>
  </node>
  <node id="160558" label="PIGM" cy:nodeId="105954">
    <graphics y="-290.0247222311259" z="0.0" x="-410.4797071603989"/>
  </node>
  <node id="160637" label="SLC35A1" cy:nodeId="108001">
    <graphics y="3130.4244011514425" z="0.0" x="-1017.1523374704575"/>
  </node>
  <node id="160638" label="PBX1" cy:nodeId="105953">
    <graphics y="3139.7219780557393" z="0.0" x="-917.5855116037583"/>
  </node>
  <node id="160635" label="PHF20" cy:nodeId="105956">
    <graphics y="-1159.5230323202372" z="0.0" x="174.91667040307766"/>
  </node>
  <node id="160563" label="SLC17A5" cy:nodeId="108005">
    <graphics y="169.75168691804402" z="0.0" x="52.05270250756985"/>
  </node>
  <node id="160631" label="POLR3A" cy:nodeId="105960">
    <graphics y="-337.8856097585917" z="0.0" x="135.19499071557766"/>
  </node>
  <node id="160632" label="POLR2B" cy:nodeId="105959">
    <graphics y="-511.6875678426982" z="0.0" x="195.63758715112454"/>
  </node>
  <node id="160629" label="PRDM1" cy:nodeId="105962">
    <graphics y="1305.684059964919" z="0.0" x="-467.33992139379734"/>
  </node>
  <node id="160625" label="RAC3" cy:nodeId="105964">
    <graphics y="-2842.7970191366435" z="0.0" x="480.9890886159683"/>
  </node>
  <node id="160627" label="PRKDC" cy:nodeId="105963">
    <graphics y="-587.5277015096904" z="0.0" x="-223.65886823217625"/>
  </node>
  <node id="160624" label="RB1" cy:nodeId="105965">
    <graphics y="-344.09833253691204" z="0.0" x="455.0373063894058"/>
  </node>
</graph>
