# Supplementary material for: A systems-based framework to computationally describe putative transcription factors and signaling pathways regulating glycan biosynthesis
Source: publisher site journal article supplement (doi:10.3762/bjoc.17.119), 2021-07-22
Supplement: Additional file 3 [file Table_S4.xlsx]

## Sheet: Sheet 1
Fisher’s exact test to infer TF–glycosylation pathway relation
glycoPath	TF	pEnrich	ctype
sulfated_glycans	BCOR	0.0408125	ACC
sulfated_glycans	MNT	0.0205479	ACC
sulfated_glycans	RORA	0.0408125	ACC
Terminal_Fucose	CBX4	0.0273973	ACC
Terminal_Fucose	TEAD2	0.0273973	ACC
LacdiNAc	POLR3GL	0.0136986	ACC
Blood_Groups	CBX4	0.0342466	ACC
Blood_Groups	TEAD2	0.0342466	ACC
SA_paths	LARP7	0.0273973	ACC
SA_paths	MNT	0.0273973	ACC
Type_1_2_LacNAc	ERG	0.0273028	ACC
Type_1_2_LacNAc	POLR3GL	0.0273028	ACC
O_fucose	MNT	0.0342466	ACC
O_mannose	DOT1L	0.0205479	ACC
O_mannose	HOXA7	0.0205479	ACC
HA_Synthesis	AHR	0.0136986	ACC
HS_Extend	PCGF6	0.0273028	ACC
HS_Extend	PPARA	0.0408125	ACC
CS_DS_Extend	UBE2I	0.0273973	ACC
GalNAc_Olinked	ZBTB33	0.0410959	ACC
Complex_Nlinked	HINFP	0.0243584	ACC
Dolichol	ATF7IP	0.0113368	ACC
Dolichol	PPARA	0.031806	ACC
Gangliosides	LARP7	0.0273973	ACC
Gangliosides	MNT	0.0273973	ACC
GSL_Core	HECTD1	0.0273973	ACC
GPI_Anchor	MBD3	0.039688	BLCA
sulfated_glycans	BCAT1	0.0262295	BLCA
sulfated_glycans	EGR2	0.0425344	BLCA
sulfated_glycans	ETS1	0.0262295	BLCA
sulfated_glycans	PRAME	0.0262295	BLCA
sulfated_glycans	TET3	0.0262295	BLCA
Terminal_Fucose	CIITA	0.0195753	BLCA
Terminal_Fucose	FOXP3	0.0292665	BLCA
Terminal_Fucose	LYL1	0.0244289	BLCA
LacdiNAc	CBX8	0.00983607	BLCA
LacdiNAc	CIITA	0.0388618	BLCA
LacdiNAc	CPSF3L	0.0292665	BLCA
LacdiNAc	STAT1	0.0195914	BLCA
LacdiNAc	ZBTB17	0.00983607	BLCA
SA_paths	BCAT1	0.0245902	BLCA
SA_paths	CBX6	0.048615	BLCA
SA_paths	EGR2	0.00297657	BLCA
SA_paths	ETS1	0.0245902	BLCA
SA_paths	FOXP3	0.00800654	BLCA
SA_paths	GATA6	0.0145236	BLCA
SA_paths	MYH11	0.00800654	BLCA
SA_paths	NR2F1	0.048615	BLCA
SA_paths	STAT5A	0.0245902	BLCA
Type_1_2_LacNAc	BACH1	0.017698	BLCA
Type_1_2_LacNAc	PRAME	0.0196721	BLCA
Type_1_2_LacNAc	RYBP	0.0389889	BLCA
Type_1_2_LacNAc	STAT1	0.0389889	BLCA
Type_1_2_LacNAc	TET3	0.0196721	BLCA
O_fucose	BCAT1	0.0459016	BLCA
O_fucose	ETS1	0.0459016	BLCA
O_fucose	IRF3	0.0459016	BLCA
O_fucose	PHF20	0.0459016	BLCA
O_fucose	PRAME	0.0459016	BLCA
O_fucose	TET3	0.0459016	BLCA
O_mannose	EP400	0.042203	BLCA
O_mannose	HINFP	0.042203	BLCA
O_mannose	PRAME	0.0213115	BLCA
O_mannose	TET3	0.0213115	BLCA
O_mannose	WDR5	0.00245918	BLCA
HA_Synthesis	SMAD3	0.00981991	BLCA
HA_Synthesis	TP63	0.00981991	BLCA
HS_Extend	ATF1	0.0207096	BLCA
HS_Extend	VDR	0.0357695	BLCA
CS_DS_Extend	BACH1	0.0470659	BLCA
CS_DS_Extend	EGR2	0.000500236	BLCA
CS_DS_Extend	PRDM1	0.00963604	BLCA
CS_HS_Init	NR2F1	0.0325446	BLCA
CS_HS_Init	RNF2	0.0484567	BLCA
CS_HS_Init	TCF21	0.0325446	BLCA
GalNAc_Olinked	FOXA1	0.0278689	BLCA
GalNAc_Olinked	LARP7	0.0278689	BLCA
GalNAc_Olinked	ZBTB33	0.0234771	BLCA
N_linked_branching	ATRX	0.0262295	BLCA
N_linked_branching	HOXA13	0.0262295	BLCA
N_linked_branching	PRDM4	0.0262295	BLCA
N_linked_branching	SNAPC1	0.0262295	BLCA
Complex_Nlinked	POLR2B	0.0357952	BLCA
Complex_Nlinked	XRN2	0.0234685	BLCA
Dolichol	BRCA1	0.0352892	BLCA
Dolichol	MYBL2	0.0351744	BLCA
Dolichol	SSRP1	0.00323832	BLCA
Gangliosides	BCAT1	0.0180328	BLCA
Gangliosides	CBX6	0.0357695	BLCA
Gangliosides	EGR2	0.0207096	BLCA
Gangliosides	ETS1	0.0180328	BLCA
Gangliosides	MYH11	0.00426883	BLCA
Gangliosides	NR2F1	0.0357695	BLCA
Gangliosides	STAT5A	0.0180328	BLCA
P1PK_BloodGroup	PRAME	0.0147541	BLCA
P1PK_BloodGroup	RYBP	0.0293144	BLCA
P1PK_BloodGroup	TET3	0.0147541	BLCA
GSL_Core	BACH1	0.042781	BLCA
GSL_Core	KLF4	0.0311475	BLCA
GSL_Core	PRAME	0.0311475	BLCA
GSL_Core	TET3	0.0311475	BLCA
GPI_Anchor	BRCA1	0.0192983	BRCA_1
GPI_Anchor	E2F7	0.0465409	BRCA_1
GPI_Anchor	FANCD2	0.0465409	BRCA_1
GPI_Anchor	MAX	0.0465409	BRCA_1
GPI_Anchor	MYBL1	0.0465409	BRCA_1
GPI_Anchor	PRKDC	0.0281031	BRCA_1
GPI_Anchor	SPDEF	0.0465409	BRCA_1
GPI_Anchor	TERF1	0.0465409	BRCA_1
sulfated_glycans	EBF1	0.0494502	BRCA_1
sulfated_glycans	FLI1	0.0148784	BRCA_1
sulfated_glycans	FOXO1	0.0494502	BRCA_1
sulfated_glycans	IRF4	0.0199332	BRCA_1
Terminal_Fucose	ADNP	0.0238994	BRCA_1
Terminal_Fucose	E2F6	0.0238994	BRCA_1
Terminal_Fucose	IRF4	0.0139178	BRCA_1
Terminal_Fucose	IRF5	0.0472569	BRCA_1
Terminal_Fucose	RUNX3	0.0472569	BRCA_1
LacdiNAc	CPSF3L	0.0239894	BRCA_1
LacdiNAc	MAZ	0.0194843	BRCA_1
LacdiNAc	MYH11	0.0288803	BRCA_1
LacdiNAc	UBTF	0.0251572	BRCA_1
LacdiNAc	USF2	0.0117158	BRCA_1
Blood_Groups	E2F6	0.0113208	BRCA_1
SA_paths	ETS1	0.0368193	BRCA_1
SA_paths	FLI1	0.0025901	BRCA_1
SA_paths	LMO2	0.0129097	BRCA_1
SA_paths	MECOM	0.0192918	BRCA_1
SA_paths	SOX17	0.00917403	BRCA_1
Type_1_2_LacNAc	BCAT1	0.036478	BRCA_1
Type_1_2_LacNAc	CREB3L4	0.036478	BRCA_1
Type_1_2_LacNAc	EGR2	0.0240952	BRCA_1
Type_1_2_LacNAc	FOS	0.036478	BRCA_1
Type_1_2_LacNAc	INTS3	0.036478	BRCA_1
Type_1_2_LacNAc	PRDM1	0.0394726	BRCA_1
O_mannose	CREB3L4	0.0163522	BRCA_1
O_mannose	INTS3	0.0163522	BRCA_1
O_mannose	RXRA	0.0483186	BRCA_1
O_mannose	USF1	0.0483186	BRCA_1
O_mannose	WDR5	0.0483186	BRCA_1
O_mannose	ZBTB17	0.0230012	BRCA_1
HA_Synthesis	ATF3	0.000734553	BRCA_1
HA_Synthesis	EBF1	0.0125032	BRCA_1
HS_Extend	CHD2	0.0423364	BRCA_1
HS_Extend	EZH1	0.0423364	BRCA_1
HS_Extend	FOXA1	0.0423364	BRCA_1
HS_Extend	MECP2	0.0423364	BRCA_1
HS_Extend	SMAD4	0.0423364	BRCA_1
CS_DS_Extend	ERG	0.0420836	BRCA_1
CS_DS_Extend	FOXO1	0.000702759	BRCA_1
CS_DS_Extend	MEF2C	0.000807111	BRCA_1
CS_DS_Extend	MEIS1	0.014147	BRCA_1
CS_DS_Extend	NR2F1	0.0391227	BRCA_1
CS_DS_Extend	RUNX1	0.0138332	BRCA_1
CS_DS_Extend	TEAD1	0.0404537	BRCA_1
CS_DS_Extend	YAP1	0.00505403	BRCA_1
CS_HS_Init	CTBP1	0.0369571	BRCA_1
GalNAc_Olinked	BMI1	0.0349318	BRCA_1
GalNAc_Olinked	MECOM	0.000856252	BRCA_1
GalNAc_Olinked	YAP1	0.00575573	BRCA_1
N_linked_branching	JDP2	0.0213836	BRCA_1
N_linked_branching	NFIC	0.0213836	BRCA_1
N_linked_branching	POLR3A	0.0423364	BRCA_1
Complex_Nlinked	ATF2	0.00463985	BRCA_1
Complex_Nlinked	POLR2B	0.00659031	BRCA_1
Complex_Nlinked	XRN2	0.014403	BRCA_1
Dolichol	CASP8AP2	0.0222504	BRCA_1
Dolichol	MYBL2	0.000274173	BRCA_1
Gangliosides	CBX7	0.0325764	BRCA_1
Gangliosides	FLI1	0.0237674	BRCA_1
Gangliosides	LMO2	0.0189369	BRCA_1
Gangliosides	SOX17	0.0147119	BRCA_1
P1PK_BloodGroup	BCAT1	0.0289308	BRCA_1
P1PK_BloodGroup	CREB3L4	0.0289308	BRCA_1
P1PK_BloodGroup	FOS	0.0289308	BRCA_1
P1PK_BloodGroup	INTS3	0.0289308	BRCA_1
GSL_Core	CREB3L4	0.00754717	BRCA_1
GSL_Core	INTS3	0.00754717	BRCA_1
GSL_Core	USF1	0.0224992	BRCA_1
GPI_Anchor	ATRX	0.0217391	BRCA_2
GPI_Anchor	CREB3	0.0217391	BRCA_2
GPI_Anchor	GABPA	0.0430636	BRCA_2
GPI_Anchor	SIRT6	0.0206525	BRCA_2
sulfated_glycans	FLI1	0.0270207	BRCA_2
sulfated_glycans	SPIB	0.00481282	BRCA_2
Terminal_Fucose	ADNP	0.0326087	BRCA_2
Terminal_Fucose	CIITA	0.0326087	BRCA_2
Terminal_Fucose	MYBL1	0.0326087	BRCA_2
Terminal_Fucose	RUNX3	0.0326087	BRCA_2
LacdiNAc	CPSF3L	0.0271739	BRCA_2
LacdiNAc	EHMT2	0.0271739	BRCA_2
LacdiNAc	SIRT6	0.0321129	BRCA_2
Blood_Groups	MYBL1	0.00543478	BRCA_2
SA_paths	FLI1	0.00413242	BRCA_2
SA_paths	IKZF1	0.0171211	BRCA_2
Type_1_2_LacNAc	DEK	0.0298913	BRCA_2
Type_1_2_LacNAc	GRHL1	0.0298913	BRCA_2
Type_1_2_LacNAc	RNF2	0.0298913	BRCA_2
O_fucose	CBFA2T3	0.0248446	BRCA_2
O_fucose	FLI1	0.00958725	BRCA_2
O_fucose	HSF1	0.0248446	BRCA_2
O_fucose	IKZF1	0.031723	BRCA_2
O_mannose	HSF1	0.0243234	BRCA_2
O_mannose	MAZ	0.0243234	BRCA_2
O_mannose	USF1	0.0323426	BRCA_2
HA_Synthesis	AHR	0.00543478	BRCA_2
HS_Extend	KDM1B	0.0190217	BRCA_2
CS_DS_Extend	ELL2	0.048913	BRCA_2
CS_DS_Extend	ERG	0.0302034	BRCA_2
CS_HS_Init	IRF3	0.0361673	BRCA_2
GalNAc_Olinked	FOXA1	0.00665559	BRCA_2
GalNAc_Olinked	SMAD2	0.0353261	BRCA_2
GalNAc_Olinked	SPDEF	0.0353261	BRCA_2
N_linked_branching	JDP2	0.0298913	BRCA_2
Complex_Nlinked	CHD2	0.0405369	BRCA_2
Complex_Nlinked	RCOR1	0.00629509	BRCA_2
Dolichol	CASP8AP2	0.0138073	BRCA_2
Dolichol	NR2C2	0.0138073	BRCA_2
Gangliosides	CBX6	0.0407609	BRCA_2
Gangliosides	IRF4	0.0407609	BRCA_2
Gangliosides	LYL1	0.00970123	BRCA_2
Gangliosides	MEIS3	0.0407609	BRCA_2
Gangliosides	MSX1	0.0407609	BRCA_2
P1PK_BloodGroup	DEK	0.0163043	BRCA_2
P1PK_BloodGroup	GRHL1	0.0163043	BRCA_2
P1PK_BloodGroup	HSF1	0.0482491	BRCA_2
P1PK_BloodGroup	MAZ	0.0482491	BRCA_2
P1PK_BloodGroup	RNF2	0.0163043	BRCA_2
GSL_Core	BCL11A	0.0434783	BRCA_2
GSL_Core	IKZF1	0.0426349	BRCA_2
GSL_Core	IRF4	0.0434783	BRCA_2
GPI_Anchor	BRCA1	0.0383939	CESC
sulfated_glycans	ADNP	0.046281	CESC
sulfated_glycans	BATF	0.0189594	CESC
sulfated_glycans	FLI1	0.046281	CESC
sulfated_glycans	FOXP3	0.0375783	CESC
sulfated_glycans	GATA6	0.046281	CESC
sulfated_glycans	IRF4	0.0117106	CESC
sulfated_glycans	STAT4	0.0189594	CESC
sulfated_glycans	TBX21	0.046281	CESC
Terminal_Fucose	ADNP	0.0247934	CESC
Terminal_Fucose	EHF	0.00181195	CESC
Terminal_Fucose	GATA6	0.0247934	CESC
Terminal_Fucose	SOX2	0.0247934	CESC
Terminal_Fucose	STAT6	0.0247934	CESC
Terminal_Fucose	TBX21	0.0247934	CESC
Terminal_Fucose	USF1	0.0490121	CESC
LacdiNAc	CPSF3L	0.00330579	CESC
LacdiNAc	MAZ	0.0066061	CESC
Blood_Groups	KLF5	0.000245203	CESC
Blood_Groups	SOX2	0.00991736	CESC
Blood_Groups	STAT6	0.00991736	CESC
SA_paths	BATF	0.00979121	CESC
SA_paths	FLI1	0.0330579	CESC
SA_paths	FOXP3	0.0197551	CESC
SA_paths	IKZF1	0.0197551	CESC
SA_paths	IRF1	0.00305761	CESC
SA_paths	IRF4	0.00599369	CESC
SA_paths	LEF1	0.0330579	CESC
SA_paths	RUNX1	0.0330579	CESC
SA_paths	STAT4	0.00979121	CESC
Type_1_2_LacNAc	GRHL1	0.0490121	CESC
Type_1_2_LacNAc	INTS3	0.0490121	CESC
Type_1_2_LacNAc	KLF4	0.0490121	CESC
Type_1_2_LacNAc	MEF2D	0.0490121	CESC
Type_1_2_LacNAc	NFYB	0.0490121	CESC
Type_1_2_LacNAc	SMAD4	0.0490121	CESC
Type_1_2_LacNAc	SMARCC1	0.0490121	CESC
Type_1_2_LacNAc	TP63	0.0490121	CESC
O_fucose	FLI1	0.0396694	CESC
O_fucose	FOXP3	0.0280611	CESC
O_fucose	IKZF1	0.0280611	CESC
O_fucose	IRF4	0.00862841	CESC
O_fucose	LEF1	0.0396694	CESC
O_fucose	PHF20	0.0396694	CESC
O_fucose	RUNX1	0.0396694	CESC
O_fucose	STAT4	0.0140322	CESC
O_mannose	INTS3	0.029555	CESC
O_mannose	MEF2D	0.029555	CESC
O_mannose	NRF1	0.014876	CESC
O_mannose	SMARCC1	0.029555	CESC
O_mannose	WDR5	0.014876	CESC
HA_Synthesis	FOSL1	0.00661157	CESC
HA_Synthesis	JARID2	0.00661157	CESC
HA_Synthesis	KLF4	0.0131903	CESC
HA_Synthesis	TP63	0.0131903	CESC
HS_Extend	FOXK1	0.00480058	CESC
HS_Extend	RXRA	0.0413223	CESC
HS_Extend	TFAP2C	0.0413223	CESC
HS_Extend	TTF2	0.0394232	CESC
CS_DS_Extend	ATF1	0.00286503	CESC
CS_HS_Init	KLF11	0.0231405	CESC
CS_HS_Init	PHF6	0.0231405	CESC
GalNAc_Olinked	FOXA1	0.000409587	CESC
GalNAc_Olinked	HIF1A	0.00411524	CESC
GalNAc_Olinked	MECOM	0.000426906	CESC
GalNAc_Olinked	NIPBL	0.0249353	CESC
Dolichol	EED	0.00136464	CESC
Dolichol	HINFP	0.0124678	CESC
Dolichol	NPAT	0.0346743	CESC
Gangliosides	FLI1	0.0132231	CESC
Gangliosides	IRF1	0.0392112	CESC
Gangliosides	STAT1	0.026293	CESC
P1PK_BloodGroup	GRHL1	0.0360626	CESC
P1PK_BloodGroup	INTS3	0.0360626	CESC
P1PK_BloodGroup	KLF4	0.0360626	CESC
P1PK_BloodGroup	MEF2D	0.0360626	CESC
P1PK_BloodGroup	NFYB	0.0360626	CESC
P1PK_BloodGroup	SMAD4	0.0360626	CESC
P1PK_BloodGroup	SMARCC1	0.0360626	CESC
P1PK_BloodGroup	TP63	0.0360626	CESC
GSL_Core	AHR	0.0396694	CESC
GSL_Core	BRD3	0.0280611	CESC
GPI_Anchor	BRCA1	0.046	COAD_READ.
GPI_Anchor	E2F1	0.0369532	COAD_READ.
GPI_Anchor	IRF3	0.046	COAD_READ.
GPI_Anchor	MBD2	0.046	COAD_READ.
GPI_Anchor	MBD3	0.046	COAD_READ.
GPI_Anchor	NFYA	0.046	COAD_READ.
sulfated_glycans	KDM5B	0.038	COAD_READ.
LacdiNAc	CPSF3L	0.0317122	COAD_READ.
LacdiNAc	NCOR2	0.0317122	COAD_READ.
LacdiNAc	TCF7L2	0.0159519	COAD_READ.
Blood_Groups	TCF7L2	0.004	COAD_READ.
SA_paths	FOXP3	0.00148693	COAD_READ.
SA_paths	IRF4	0.0114867	COAD_READ.
SA_paths	MYH11	0.0324106	COAD_READ.
Type_1_2_LacNAc	KLF4	0.00156931	COAD_READ.
Type_1_2_LacNAc	RYBP	0.03	COAD_READ.
Type_1_2_LacNAc	TCF7L2	0.000841683	COAD_READ.
O_fucose	ARID3A	0.0423071	COAD_READ.
O_fucose	STAT5B	0.00601238	COAD_READ.
O_mannose	SMARCC1	0.0435591	COAD_READ.
O_mannose	SVIL	0.022	COAD_READ.
HA_Synthesis	BATF3	0.016	COAD_READ.
HS_Extend	CHD2	0.0169387	COAD_READ.
HS_Extend	FOSL2	0.0169387	COAD_READ.
CS_DS_Extend	BATF3	0.0329878	COAD_READ.
CS_DS_Extend	LEF1	0.0461805	COAD_READ.
CS_DS_Extend	NR2F2	0.00197586	COAD_READ.
CS_DS_Extend	RUNX1	1.40255e-05	COAD_READ.
CS_DS_Extend	RUNX2	0.0477977	COAD_READ.
CS_DS_Extend	TCF21	0.0169087	COAD_READ.
CS_HS_Init	ATRX	0.046	COAD_READ.
CS_HS_Init	CTBP1	0.046	COAD_READ.
CS_HS_Init	JMJD1C	0.0114945	COAD_READ.
CS_HS_Init	RNF2	0.046	COAD_READ.
CS_HS_Init	RUNX1	0.0479011	COAD_READ.
GalNAc_Olinked	AUTS2	0.016	COAD_READ.
GalNAc_Olinked	KLF4	0.00231898	COAD_READ.
GalNAc_Olinked	SMAD1	0.0317756	COAD_READ.
N_linked_branching	BARX2	0.038	COAD_READ.
N_linked_branching	DICER1	0.038	COAD_READ.
N_linked_branching	PRDM4	0.038	COAD_READ.
N_linked_branching	SVIL	0.038	COAD_READ.
Complex_Nlinked	CHD4	0.0186899	COAD_READ.
Complex_Nlinked	RBBP5	0.00862773	COAD_READ.
Dolichol	CBFB	0.0156553	COAD_READ.
Dolichol	CBX3	0.0431307	COAD_READ.
Dolichol	CDK8	0.0460583	COAD_READ.
Dolichol	E2F1	0.00600787	COAD_READ.
Dolichol	E2F4	0.0431307	COAD_READ.
Dolichol	E2F7	0.0156553	COAD_READ.
Dolichol	EED	0.00191762	COAD_READ.
Dolichol	ELF1	0.0460583	COAD_READ.
Dolichol	MYBL2	0.00697596	COAD_READ.
Gangliosides	FOXP3	0.00280466	COAD_READ.
Gangliosides	HEYL	0.044	COAD_READ.
Gangliosides	IRF4	0.0238867	COAD_READ.
Gangliosides	KDM5B	0.044	COAD_READ.
Gangliosides	MEIS3	0.044	COAD_READ.
Gangliosides	MYH11	0.00858575	COAD_READ.
P1PK_BloodGroup	PRDM1	0.0409638	COAD_READ.
P1PK_BloodGroup	RYBP	0.028	COAD_READ.
GSL_Core	AHR	0.032	COAD_READ.
GPI_Anchor	E2F6	0.0366295	GBM.
GPI_Anchor	RFX2	0.032433	GBM.
GPI_Anchor	RNF2	0.0475925	GBM.
sulfated_glycans	MAZ	0.0181899	GBM.
Terminal_Fucose	ERG	0.0229108	GBM.
Terminal_Fucose	MEF2B	0.0172245	GBM.
Terminal_Fucose	POU2F2	0.0285696	GBM.
Terminal_Fucose	RBCK1	0.0115107	GBM.
Terminal_Fucose	SUPT5H	0.0285696	GBM.
LacdiNAc	CPSF3L	0.0207868	GBM.
LacdiNAc	FUS	0.0336538	GBM.
LacdiNAc	MBD4	0.0336538	GBM.
LacdiNAc	SIRT6	0.0341566	GBM.
LacdiNAc	SMARCA4	0.0151666	GBM.
LacdiNAc	ZBTB17	0.0207868	GBM.
Blood_Groups	ERG	0.000396206	GBM.
Blood_Groups	MEF2B	0.0257621	GBM.
Blood_Groups	RBCK1	0.0172411	GBM.
Blood_Groups	SOX10	0.0342174	GBM.
Blood_Groups	SUPT5H	0.0426074	GBM.
Blood_Groups	TCF12	0.0426074	GBM.
SA_paths	BCAT1	0.0403846	GBM.
SA_paths	LYL1	0.0478848	GBM.
SA_paths	SOX10	0.00907735	GBM.
SA_paths	TAL1	0.00465803	GBM.
SA_paths	USF2	0.0403846	GBM.
Type_1_2_LacNAc	BACH1	0.0188082	GBM.
Type_1_2_LacNAc	MAF	0.0350254	GBM.
O_fucose	MAZ	0.0422895	GBM.
O_mannose	NOTCH1	0.0187663	GBM.
O_mannose	SOX2	0.0144999	GBM.
HA_Synthesis	BACH1	0.0163462	GBM.
HS_Extend	BRD7	0.0384615	GBM.
HS_Extend	ERF	0.0384615	GBM.
HS_Extend	ETV1	0.0268105	GBM.
HS_Extend	MEF2C	0.0384615	GBM.
HS_Extend	NCOR1	0.0384615	GBM.
HS_Extend	PPARA	0.0384615	GBM.
HS_Extend	RXRA	0.0384615	GBM.
CS_DS_Extend	BCL6	0.0336538	GBM.
CS_DS_Extend	ETV4	0.0336538	GBM.
CS_DS_Extend	FOSL1	0.0151666	GBM.
CS_DS_Extend	JUN	0.0336538	GBM.
CS_DS_Extend	STAT3	0.0201515	GBM.
CS_HS_Init	BCL6	0.0240385	GBM.
CS_HS_Init	ERF	0.0240385	GBM.
CS_HS_Init	MYBL1	0.0240385	GBM.
CS_HS_Init	PHF6	0.0240385	GBM.
GalNAc_Olinked	IKZF1	0.0146686	GBM.
GalNAc_Olinked	MBD4	0.0269231	GBM.
GalNAc_Olinked	MEF2A	0.0390626	GBM.
GalNAc_Olinked	NEUROD2	0.0269231	GBM.
GalNAc_Olinked	USF2	0.0269231	GBM.
GalNAc_Olinked	WWTR1	0.000570219	GBM.
N_linked_branching	CBX4	0.0221154	GBM.
N_linked_branching	CEBPA	0.0120883	GBM.
N_linked_branching	CEBPD	0.0221154	GBM.
N_linked_branching	LYL1	0.0153337	GBM.
N_linked_branching	SATB1	0.0221154	GBM.
N_linked_branching	SNAPC1	0.0221154	GBM.
N_linked_branching	STAT5B	0.0437625	GBM.
Complex_Nlinked	ATF7	0.0138207	GBM.
Complex_Nlinked	E2F8	0.0390268	GBM.
Complex_Nlinked	GMEB2	0.0390268	GBM.
Dolichol	CBX3	0.0248214	GBM.
Dolichol	CEBPZ	0.0269027	GBM.
Dolichol	E2F7	0.0287345	GBM.
Dolichol	GTF2B	0.0248214	GBM.
Dolichol	HDAC3	0.00509497	GBM.
Dolichol	THAP1	0.0269027	GBM.
Dolichol	XRN2	0.013476	GBM.
Gangliosides	BCAT1	0.0259615	GBM.
Gangliosides	MAZ	0.0424605	GBM.
P1PK_BloodGroup	DAXX	0.0490385	GBM.
P1PK_BloodGroup	EZH2	0.0422817	GBM.
P1PK_BloodGroup	KDM1A	0.0422817	GBM.
P1PK_BloodGroup	RAC3	0.0490385	GBM.
GSL_Core	DAXX	0.0288462	GBM.
GSL_Core	RAC3	0.0288462	GBM.
GPI_Anchor	EZH2	0.047048	HNSC
GPI_Anchor	FANCD2	0.047048	HNSC
GPI_Anchor	GRHL1	0.047048	HNSC
GPI_Anchor	HCFC1	0.0159869	HNSC
GPI_Anchor	IRF3	0.00674889	HNSC
GPI_Anchor	MBD2	0.047048	HNSC
GPI_Anchor	MBD3	0.000919297	HNSC
GPI_Anchor	SIRT6	0.028839	HNSC
GPI_Anchor	TBP	0.0391716	HNSC
GPI_Anchor	YY1	0.0123976	HNSC
sulfated_glycans	BCAT1	0.00281608	HNSC
sulfated_glycans	NFIC	0.0347334	HNSC
sulfated_glycans	RUNX1	0.040193	HNSC
sulfated_glycans	TEAD2	0.0253556	HNSC
Terminal_Fucose	ADNP	0.0156827	HNSC
Terminal_Fucose	BCAT1	0.0311336	HNSC
Terminal_Fucose	EED	0.0311336	HNSC
Terminal_Fucose	PML	0.0463561	HNSC
LacdiNAc	KLF4	0.0184502	HNSC
LacdiNAc	PRDM1	0.0365767	HNSC
LacdiNAc	RCOR1	0.0365767	HNSC
LacdiNAc	SIX5	0.0365767	HNSC
Blood_Groups	EHF	0.0110395	HNSC
Blood_Groups	MEF2C	0.000960293	HNSC
SA_paths	EGR2	0.0105374	HNSC
SA_paths	ERG	0.034527	HNSC
SA_paths	FLI1	0.0268281	HNSC
SA_paths	IKZF1	0.00879402	HNSC
SA_paths	MEF2C	0.00621402	HNSC
SA_paths	TCF7	0.0181173	HNSC
Type_1_2_LacNAc	FOXA1	0.00090698	HNSC
Type_1_2_LacNAc	HES4	0.0313653	HNSC
Type_1_2_LacNAc	MXD1	0.0313653	HNSC
Type_1_2_LacNAc	SVIL	0.0313653	HNSC
O_fucose	HSF1	0.0221355	HNSC
O_fucose	RUNX1	0.012781	HNSC
O_fucose	TEAD2	0.00474424	HNSC
O_mannose	SVIL	0.0258303	HNSC
HA_Synthesis	SNAI2	0.0156827	HNSC
HS_Extend	ATF1	0.0290361	HNSC
HS_Extend	YY1	0.034884	HNSC
CS_DS_Extend	FLI1	0.010402	HNSC
CS_DS_Extend	FOXO1	0.0282712	HNSC
CS_DS_Extend	RUNX1	0.00809663	HNSC
CS_DS_Extend	SNAI2	0.00623612	HNSC
CS_DS_Extend	TEAD1	0.0395222	HNSC
CS_DS_Extend	VDR	0.00637633	HNSC
CS_HS_Init	C17orf49	0.048893	HNSC
CS_HS_Init	CEBPB	0.048893	HNSC
CS_HS_Init	HECTD1	0.048893	HNSC
CS_HS_Init	KDM5B	0.048893	HNSC
CS_HS_Init	MBD3	0.0213386	HNSC
CS_HS_Init	SRF	0.048893	HNSC
CS_HS_Init	ZBTB17	0.0132156	HNSC
GalNAc_Olinked	FOXA1	0.0377534	HNSC
GalNAc_Olinked	RLF	0.0461255	HNSC
N_linked_branching	BATF3	0.0132156	HNSC
N_linked_branching	IRF1	0.0420718	HNSC
N_linked_branching	MYBL1	0.00682145	HNSC
N_linked_branching	SNAPC1	0.048893	HNSC
N_linked_branching	TCF7	0.0461662	HNSC
Complex_Nlinked	ERCC6	0.0371338	HNSC
Dolichol	BRCA1	0.00943954	HNSC
Dolichol	CEBPZ	0.0107805	HNSC
Dolichol	E2F1	0.0282448	HNSC
Dolichol	E2F7	0.028621	HNSC
Dolichol	LIN9	0.0301296	HNSC
Dolichol	MYBL2	0.000517261	HNSC
Dolichol	SSRP1	0.0282448	HNSC
Dolichol	TBP	0.0282448	HNSC
Dolichol	WDR5	0.0418112	HNSC
Gangliosides	EBF1	0.0233179	HNSC
Gangliosides	EGR2	0.0187002	HNSC
Gangliosides	ERG	0.0411488	HNSC
Gangliosides	MEF2C	0.00170047	HNSC
P1PK_BloodGroup	SVIL	0.0166052	HNSC
P1PK_BloodGroup	TEAD1	0.0340576	HNSC
GSL_Core	FOXO3	0.0438102	HNSC
GSL_Core	MAFF	0.0221402	HNSC
GSL_Core	PRDM1	0.0438102	HNSC
GSL_Core	RCOR1	0.0438102	HNSC
GSL_Core	SVIL	0.0221402	HNSC
GPI_Anchor	HOXB4	0.00728771	KICH
sulfated_glycans	LDB1	0.0226409	KICH
sulfated_glycans	MNT	0.0226409	KICH
sulfated_glycans	PCGF2	0.0113636	KICH
LacdiNAc	NFYC	0.0450225	KICH
LacdiNAc	SIRT6	0.0450225	KICH
SA_paths	ERG	0.033832	KICH
SA_paths	FLI1	0.033832	KICH
SA_paths	LDB1	0.0226409	KICH
Type_1_2_LacNAc	MNT	0.0301302	KICH
Type_1_2_LacNAc	SRCAP	0.00102645	KICH
O_fucose	LMO2	0.00129623	KICH
O_fucose	LYL1	0.00380954	KICH
O_mannose	DOT1L	0.0189394	KICH
O_mannose	HOXA10	0.0189394	KICH
O_mannose	HOXA7	0.0189394	KICH
O_mannose	MNT	0.000288052	KICH
CS_DS_Extend	ERF	0.0265152	KICH
CS_HS_Init	AEBP2	0.0416667	KICH
CS_HS_Init	CCDC101	0.0416667	KICH
CS_HS_Init	ESRRA	0.0416667	KICH
CS_HS_Init	HECTD1	0.0416667	KICH
CS_HS_Init	PHF6	0.0416667	KICH
CS_HS_Init	PIAS4	0.0416667	KICH
N_linked_branching	MSX1	0.033832	KICH
Complex_Nlinked	TOP2B	0.0349125	KICH
Dolichol	MECOM	0.0412202	KICH
Dolichol	TRRAP	0.0412202	KICH
Gangliosides	LDB1	0.00757576	KICH
P1PK_BloodGroup	MNT	0.0151227	KICH
P1PK_BloodGroup	MSX1	0.0226409	KICH
GSL_Core	RBBP5	0.0416667	KICH
GPI_Anchor	BTAF1	0.0466606	KIRC
GPI_Anchor	ERCC3	0.0466606	KIRC
GPI_Anchor	LDB1	0.0466606	KIRC
GPI_Anchor	SP2	0.0283947	KIRC
GPI_Anchor	SUMO2	0.00213647	KIRC
sulfated_glycans	ADNP	0.0301921	KIRC
sulfated_glycans	CIITA	0.00835502	KIRC
sulfated_glycans	FOXP3	0.0122964	KIRC
sulfated_glycans	GLI2	0.0301921	KIRC
sulfated_glycans	IKZF1	0.0410173	KIRC
sulfated_glycans	MECOM	0.0301921	KIRC
sulfated_glycans	MEIS3	0.0301921	KIRC
sulfated_glycans	STAT2	0.0483034	KIRC
sulfated_glycans	TBX21	0.0301921	KIRC
Terminal_Fucose	ADNP	0.032022	KIRC
Terminal_Fucose	ELK3	0.032022	KIRC
Terminal_Fucose	NR2F1	0.032022	KIRC
Terminal_Fucose	PPARG	0.032022	KIRC
Terminal_Fucose	TBX21	0.032022	KIRC
Terminal_Fucose	TTF1	0.032022	KIRC
LacdiNAc	BCAT1	0.0344802	KIRC
LacdiNAc	IRF2	0.0344802	KIRC
LacdiNAc	LYL1	0.0199322	KIRC
LacdiNAc	POU2F2	0.0173833	KIRC
LacdiNAc	RELA	0.0173833	KIRC
LacdiNAc	RUNX1	0.0333434	KIRC
Blood_Groups	ELK3	0.0228728	KIRC
Blood_Groups	ETS2	0.045243	KIRC
Blood_Groups	HES1	0.045243	KIRC
Blood_Groups	NR2F1	0.0228728	KIRC
Blood_Groups	PPARG	0.0228728	KIRC
Blood_Groups	SRF	0.045243	KIRC
Blood_Groups	TCF7L2	0.045243	KIRC
Blood_Groups	TTF1	0.0228728	KIRC
SA_paths	GLI2	0.0356816	KIRC
SA_paths	MECOM	0.0356816	KIRC
SA_paths	MEIS3	0.0356816	KIRC
SA_paths	TCF7L1	0.00938241	KIRC
Type_1_2_LacNAc	BCAT1	0.0470309	KIRC
Type_1_2_LacNAc	IRF2	0.0470309	KIRC
Type_1_2_LacNAc	MEF2C	0.0262402	KIRC
Type_1_2_LacNAc	POU2F2	0.0237877	KIRC
Type_1_2_LacNAc	RUNX1	0.00651941	KIRC
O_fucose	DDIT3	0.0338518	KIRC
O_fucose	GLI2	0.0338518	KIRC
O_fucose	IRF3	0.0345665	KIRC
O_fucose	MECOM	0.0338518	KIRC
O_fucose	MEIS3	0.0338518	KIRC
O_fucose	PCGF1	0.0338518	KIRC
O_fucose	POU5F1	0.0338518	KIRC
O_mannose	KDM6B	0.00038947	KIRC
O_mannose	SMAD3	0.0352908	KIRC
HA_Synthesis	GATA6	0.0145784	KIRC
HA_Synthesis	MYH11	0.0361463	KIRC
HA_Synthesis	SNAI2	0.0361463	KIRC
HS_Extend	ERG	0.0423811	KIRC
HS_Extend	ETS1	0.00564573	KIRC
HS_Extend	GATA2	0.0149304	KIRC
HS_Extend	HEY1	0.0443771	KIRC
HS_Extend	MECP2	0.0327432	KIRC
HS_Extend	TAL1	0.0443771	KIRC
HS_Extend	TCF7L1	0.0240888	KIRC
CS_DS_Extend	FOXO1	0.0135343	KIRC
CS_DS_Extend	HIF1A	0.00534523	KIRC
CS_DS_Extend	NR2F2	0.0133276	KIRC
CS_DS_Extend	PRDM1	0.0405799	KIRC
CS_DS_Extend	RUNX1	0.0245531	KIRC
CS_DS_Extend	SMAD1	0.0193101	KIRC
CS_DS_Extend	SNAI2	0.0262429	KIRC
CS_HS_Init	CHD1	0.0422099	KIRC
CS_HS_Init	HIF1A	0.0422099	KIRC
CS_HS_Init	NR2F2	0.00945177	KIRC
CS_HS_Init	PRDM1	0.0292151	KIRC
GalNAc_Olinked	BCAT1	0.000633401	KIRC
GalNAc_Olinked	IKZF1	0.0301848	KIRC
GalNAc_Olinked	IRF4	0.0203936	KIRC
GalNAc_Olinked	IRF8	0.00891263	KIRC
GalNAc_Olinked	POU2F2	0.0256176	KIRC
GalNAc_Olinked	RUNX1	0.000653869	KIRC
GalNAc_Olinked	STAT1	0.0203936	KIRC
N_linked_branching	PIAS1	0.0262814	KIRC
N_linked_branching	POLR3A	0.0199322	KIRC
N_linked_branching	PRDM4	0.0344802	KIRC
N_linked_branching	SATB1	0.0173833	KIRC
N_linked_branching	STAT3	0.0262814	KIRC
N_linked_branching	STAT5B	0.00753658	KIRC
Complex_Nlinked	ATF2	0.0161759	KIRC
Complex_Nlinked	MZF1	0.0151282	KIRC
Complex_Nlinked	SMC1A	0.0304194	KIRC
Complex_Nlinked	XRN2	0.0151439	KIRC
Dolichol	BMI1	0.0452534	KIRC
Dolichol	DEK	0.00229533	KIRC
Dolichol	NR1H2	0.0218083	KIRC
Gangliosides	GLI2	0.0365965	KIRC
Gangliosides	MECOM	0.0365965	KIRC
Gangliosides	MEIS3	0.0365965	KIRC
Gangliosides	MYH11	0.0488138	KIRC
Gangliosides	TCF7L1	0.0100727	KIRC
P1PK_BloodGroup	ATF4	0.0181979	KIRC
P1PK_BloodGroup	GATA2	0.0494062	KIRC
P1PK_BloodGroup	TBL1XR1	0.0181979	KIRC
GSL_Core	FOSL2	0.0379706	KIRC
GSL_Core	SMC1A	0.0185741	KIRC
GPI_Anchor	VEZF1	0.0209049	KIRP
sulfated_glycans	CEBPA	0.0410418	KIRP
sulfated_glycans	MITF	0.0298574	KIRP
sulfated_glycans	ZBTB17	0.0471421	KIRP
Terminal_Fucose	LYL1	0.0481597	KIRP
Terminal_Fucose	TEAD2	0.0122074	KIRP
LacdiNAc	STAT4	0.0255102	KIRP
Blood_Groups	SMAD3	0.0490885	KIRP
Blood_Groups	SRCAP	0.0212975	KIRP
Blood_Groups	TEAD2	0.0212975	KIRP
SA_paths	HES1	0.000946392	KIRP
SA_paths	MYC	0.0364158	KIRP
SA_paths	NFYC	0.0364158	KIRP
Type_1_2_LacNAc	MITF	0.00398753	KIRP
Type_1_2_LacNAc	STAT4	0.0316327	KIRP
O_fucose	ESRRA	0.0361205	KIRP
O_fucose	HES1	0.00800988	KIRP
O_fucose	MAZ	0.0361205	KIRP
O_fucose	ZBTB17	0.0338766	KIRP
O_mannose	DOT1L	0.0357143	KIRP
O_mannose	EZH1	0.0232577	KIRP
O_mannose	L3MBTL2	0.0357143	KIRP
O_mannose	MLLT1	0.0357143	KIRP
O_mannose	MNT	0.0357143	KIRP
O_mannose	RFX2	0.000398217	KIRP
HA_Synthesis	SMAD3	0.0142419	KIRP
HA_Synthesis	TCF21	0.00204082	KIRP
HS_Extend	DDX5	0.0408163	KIRP
HS_Extend	KLF10	0.0408163	KIRP
CS_DS_Extend	BHLHE40	0.0428571	KIRP
CS_DS_Extend	FLI1	0.0381336	KIRP
CS_DS_Extend	FOSL2	0.0123023	KIRP
CS_DS_Extend	HOXA2	0.0428571	KIRP
CS_DS_Extend	SOX9	0.0428571	KIRP
CS_HS_Init	C17orf49	0.027551	KIRP
CS_HS_Init	CCDC101	0.027551	KIRP
CS_HS_Init	CEBPB	0.027551	KIRP
CS_HS_Init	MBD3	0.023367	KIRP
CS_HS_Init	SIRT6	0.023367	KIRP
GalNAc_Olinked	AHR	0.00265786	KIRP
N_linked_branching	CBX7	0.0234694	KIRP
N_linked_branching	ETV1	0.0464114	KIRP
N_linked_branching	KLF4	0.0103067	KIRP
N_linked_branching	PRDM4	0.0464114	KIRP
N_linked_branching	STAT3	0.00620315	KIRP
Complex_Nlinked	CBX6	0.0118217	KIRP
Complex_Nlinked	KDM4C	0.0332963	KIRP
Dolichol	BRD3	0.0273406	KIRP
Dolichol	CTBP1	0.0294503	KIRP
Dolichol	HBP1	0.0105272	KIRP
Gangliosides	ESRRA	0.0481112	KIRP
Gangliosides	HES1	0.024315	KIRP
Gangliosides	MAFK	0.0481112	KIRP
Gangliosides	NFYC	0.0162682	KIRP
P1PK_BloodGroup	BCL3	0.0122449	KIRP
P1PK_BloodGroup	HNF4A	0.0363234	KIRP
P1PK_BloodGroup	MITF	0.00711547	KIRP
P1PK_BloodGroup	PPARA	0.0481597	KIRP
GSL_Core	AR	0.0197556	KIRP
GSL_Core	MITF	0.014218	KIRP
GSL_Core	TBL1X	0.0344104	KIRP
GPI_Anchor	CBX3	0.0398205	LAML
GPI_Anchor	KDM4A	0.013144	LAML
GPI_Anchor	LDB1	0.0229668	LAML
GPI_Anchor	SUMO2	0.00815161	LAML
GPI_Anchor	USP49	0.013144	LAML
sulfated_glycans	CREBBP	0.0494991	LAML
sulfated_glycans	ETS1	0.043234	LAML
sulfated_glycans	HOXA2	0.0494991	LAML
sulfated_glycans	MEF2D	0.0494991	LAML
sulfated_glycans	PAX5	0.0494991	LAML
Terminal_Fucose	GATA2	0.00805229	LAML
Terminal_Fucose	MED12	0.0255528	LAML
Terminal_Fucose	RUNX1	0.0418549	LAML
LacdiNAc	BACH2	0.0218032	LAML
LacdiNAc	GATA3	0.00656834	LAML
LacdiNAc	L3MBTL2	0.0431436	LAML
LacdiNAc	TBL1X	0.0431436	LAML
Blood_Groups	MED12	0.0487924	LAML
Blood_Groups	TBL1X	0.0396809	LAML
SA_paths	CREBBP	0.0394814	LAML
SA_paths	ETS1	0.00183866	LAML
SA_paths	FOXO1	0.0207878	LAML
SA_paths	GATA3	0.0207878	LAML
SA_paths	HOXA9	0.0394814	LAML
SA_paths	LDB1	0.0207878	LAML
SA_paths	MEF2C	0.00449143	LAML
SA_paths	NCOR2	0.0462138	LAML
SA_paths	PAX5	0.0394814	LAML
SA_paths	RORA	0.0394814	LAML
SA_paths	TAL1	8.32137e-05	LAML
Type_1_2_LacNAc	ARNTL	0.0195293	LAML
Type_1_2_LacNAc	BACH2	0.0465527	LAML
Type_1_2_LacNAc	BCL6	0.0350887	LAML
Type_1_2_LacNAc	GATA3	0.0284162	LAML
Type_1_2_LacNAc	MEF2D	0.0465527	LAML
Type_1_2_LacNAc	STAT6	0.0350887	LAML
O_fucose	BRD2	0.0170943	LAML
O_fucose	MEF2C	0.0121815	LAML
O_fucose	RELA	0.0233049	LAML
O_mannose	ATF4	0.0339523	LAML
O_mannose	BRD2	0.0339523	LAML
O_mannose	CEBPG	0.0459635	LAML
O_mannose	KDM5C	0.0376928	LAML
O_mannose	MEF2D	0.0459635	LAML
O_mannose	SMARCA4	0.0235748	LAML
O_mannose	WRNIP1	0.0459635	LAML
HS_Extend	ARID3A	0.0279818	LAML
HS_Extend	LIN9	0.0442964	LAML
HS_Extend	MAX	0.0223925	LAML
HS_Extend	SMARCC1	0.037512	LAML
HS_Extend	XRN2	0.0125604	LAML
CS_DS_Extend	CDK9	0.0394935	LAML
CS_DS_Extend	CEBPA	0.00559211	LAML
CS_DS_Extend	HIF1A	0.0294638	LAML
CS_DS_Extend	KAT2B	0.0294638	LAML
CS_DS_Extend	MAFK	0.00804036	LAML
CS_DS_Extend	MEF2A	0.0118342	LAML
CS_DS_Extend	NFE2	0.0118342	LAML
CS_DS_Extend	SMARCC2	0.0329244	LAML
CS_HS_Init	BRD2	0.0350887	LAML
CS_HS_Init	CCDC101	0.0465527	LAML
CS_HS_Init	CTBP1	0.0385947	LAML
CS_HS_Init	HECTD1	0.0465527	LAML
CS_HS_Init	HIF1A	0.0465527	LAML
CS_HS_Init	KAT2B	0.0465527	LAML
GalNAc_Olinked	BACH2	0.0294638	LAML
GalNAc_Olinked	CHD1	0.0212716	LAML
GalNAc_Olinked	ETS1	0.0162576	LAML
GalNAc_Olinked	GATA3	0.000452677	LAML
GalNAc_Olinked	HOXA2	0.0294638	LAML
GalNAc_Olinked	KDM4C	0.00491667	LAML
GalNAc_Olinked	PAX5	0.0294638	LAML
GalNAc_Olinked	STAT5B	0.0465137	LAML
GalNAc_Olinked	TAL1	0.000392536	LAML
N_linked_branching	CSNK2A1	0.0265174	LAML
N_linked_branching	PRDM4	0.0265174	LAML
N_linked_branching	RBBP5	0.0324876	LAML
Complex_Nlinked	MNT	0.0145141	LAML
Complex_Nlinked	RCOR1	0.00575305	LAML
Dolichol	CASP8AP2	0.0167401	LAML
Dolichol	SSRP1	0.00215301	LAML
Gangliosides	CREBBP	0.0247496	LAML
Gangliosides	NCOR2	0.0192863	LAML
Gangliosides	NFATC1	0.0489008	LAML
Gangliosides	TAL1	0.0392528	LAML
P1PK_BloodGroup	MEF2D	0.0294638	LAML
GSL_Core	CREBBP	0.0200354	LAML
GSL_Core	MEF2A	0.0055592	LAML
GSL_Core	SPIB	0.0200354	LAML
GSL_Core	TOP2B	0.0396809	LAML
GPI_Anchor	E2F6	0.026304	LGG
sulfated_glycans	CEBPA	0.00360279	LGG
sulfated_glycans	MAF	0.0110707	LGG
sulfated_glycans	SMARCA4	0.0448006	LGG
Terminal_Fucose	ERG	0.0417353	LGG
Terminal_Fucose	MZF1	0.0335199	LGG
Terminal_Fucose	NEUROD2	0.0168926	LGG
Terminal_Fucose	NR1D1	0.00847971	LGG
Terminal_Fucose	SUPT5H	0.0417353	LGG
LacdiNAc	BCAT1	0.0384002	LGG
LacdiNAc	BCL11A	0.00793421	LGG
LacdiNAc	MEF2C	0.0127084	LGG
Blood_Groups	BCL11A	0.0103226	LGG
Blood_Groups	ERG	0.03586	LGG
Blood_Groups	NEUROD2	0.0144882	LGG
Blood_Groups	NR1D1	0.00726832	LGG
Blood_Groups	SUPT5H	0.03586	LGG
SA_paths	CBX7	0.00972427	LGG
SA_paths	CEBPA	0.00384867	LGG
SA_paths	ERG	0.00881647	LGG
SA_paths	FLI1	0.0359353	LGG
SA_paths	FOXK1	0.0308904	LGG
SA_paths	IKZF1	0.0139133	LGG
SA_paths	IRF8	0.0129644	LGG
SA_paths	LHX2	0.0117102	LGG
SA_paths	MAF	0.00139512	LGG
SA_paths	MEF2C	0.00730753	LGG
SA_paths	MNT	0.0308904	LGG
SA_paths	SOX10	0.00539634	LGG
SA_paths	TAL1	0.0359353	LGG
Type_1_2_LacNAc	CHD5	0.0478498	LGG
Type_1_2_LacNAc	FOS	0.00226199	LGG
Type_1_2_LacNAc	GLIS3	0.0478498	LGG
Type_1_2_LacNAc	JUN	0.00226199	LGG
Type_1_2_LacNAc	MAFB	0.0478498	LGG
Type_1_2_LacNAc	MEF2C	0.00657965	LGG
Type_1_2_LacNAc	SAP30	0.0478498	LGG
O_fucose	CBX4	0.0213753	LGG
O_fucose	FLI1	0.0494016	LGG
O_fucose	MAF	0.0262394	LGG
O_mannose	DOT1L	0.0460327	LGG
O_mannose	GLIS3	0.0460327	LGG
O_mannose	LMTK3	0.0460327	LGG
O_mannose	MAFB	0.0460327	LGG
O_mannose	SAP30	0.0460327	LGG
O_mannose	SFPQ	0.00608939	LGG
O_mannose	SP2	0.0460327	LGG
O_mannose	WDR5	0.0340638	LGG
HA_Synthesis	CEBPG	0.0429403	LGG
HA_Synthesis	ETV1	0.0323716	LGG
HA_Synthesis	SOX9	0.0429403	LGG
HS_Extend	BCL11A	2.93467e-05	LGG
HS_Extend	CBX7	0.000795304	LGG
HS_Extend	CHD7	0.0415277	LGG
HS_Extend	LHX2	0.0110872	LGG
HS_Extend	MEF2C	8.25285e-05	LGG
HS_Extend	PPARA	0.0302847	LGG
CS_DS_Extend	BACH2	0.0335812	LGG
CS_DS_Extend	GRHL3	0.037553	LGG
CS_DS_Extend	HIF1A	0.0188841	LGG
CS_DS_Extend	KDM6B	0.00871084	LGG
CS_DS_Extend	PIAS4	0.037553	LGG
CS_DS_Extend	POU2F2	0.037553	LGG
CS_DS_Extend	RARA	0.00360599	LGG
CS_HS_Init	CLOCK	0.0266505	LGG
CS_HS_Init	CTBP1	0.0175556	LGG
CS_HS_Init	HEXIM1	0.0266505	LGG
CS_HS_Init	KAT5	0.0266505	LGG
CS_HS_Init	SIRT6	0.0168025	LGG
GalNAc_Olinked	BCAT1	0.0372116	LGG
GalNAc_Olinked	ERG	0.00329536	LGG
GalNAc_Olinked	MEF2C	0.00114084	LGG
GalNAc_Olinked	MEF2D	0.0372116	LGG
GalNAc_Olinked	MITF	0.0347714	LGG
GalNAc_Olinked	SOX4	0.0187765	LGG
GalNAc_Olinked	USP49	0.0187765	LGG
N_linked_branching	LMTK3	0.0314961	LGG
N_linked_branching	POLR3A	0.0372517	LGG
Dolichol	CASP8AP2	0.0191663	LGG
Dolichol	CBX3	0.00339237	LGG
Dolichol	CHD8	0.0375864	LGG
Dolichol	GABPA	0.0217757	LGG
Dolichol	KDM5A	0.028977	LGG
Dolichol	TAF1	0.028977	LGG
Gangliosides	CBX7	0.0021278	LGG
Gangliosides	FOXK1	0.0181708	LGG
Gangliosides	GLYR1	0.0360222	LGG
Gangliosides	LHX2	0.00258679	LGG
Gangliosides	MEF2C	0.0106221	LGG
Gangliosides	MNT	0.0181708	LGG
Gangliosides	NEUROD2	0.0360222	LGG
Gangliosides	SOX10	0.00187308	LGG
P1PK_BloodGroup	FOS	0.00138832	LGG
P1PK_BloodGroup	GLIS3	0.037553	LGG
P1PK_BloodGroup	JUN	0.00138832	LGG
P1PK_BloodGroup	MAFB	0.037553	LGG
P1PK_BloodGroup	SAP30	0.037553	LGG
GSL_Core	SAP30	0.0290733	LGG
GPI_Anchor	SCML2	0.0217436	LIHC
Terminal_Fucose	CEBPG	0.0106952	LIHC
Terminal_Fucose	DDIT3	0.0213044	LIHC
Terminal_Fucose	PDX1	0.031828	LIHC
LacdiNAc	AHR	0.0160428	LIHC
LacdiNAc	HEYL	0.0318705	LIHC
Blood_Groups	CEBPG	0.0106952	LIHC
Blood_Groups	DDIT3	0.0213044	LIHC
Blood_Groups	HEYL	0.0213044	LIHC
SA_paths	IRF8	0.0294118	LIHC
SA_paths	STAT1	0.00750979	LIHC
O_fucose	RING1	0.0382128	LIHC
O_mannose	WDR5	0.0258813	LIHC
HS_Extend	TBX3	0.026738	LIHC
CS_DS_Extend	BCL3	0.0294118	LIHC
CS_DS_Extend	CEBPA	0.0294118	LIHC
CS_DS_Extend	GATA6	0.0294118	LIHC
CS_HS_Init	IRF5	0.0320856	LIHC
GalNAc_Olinked	AHR	0.0347594	LIHC
Complex_Nlinked	E2F8	0.00903213	LIHC
Complex_Nlinked	SREBF2	0.0327985	LIHC
Dolichol	USF1	0.031836	LIHC
Gangliosides	FOXA2	0.0318705	LIHC
GPI_Anchor	BRCA1	0.0242514	LUAD
GPI_Anchor	CDK9	0.00777473	LUAD
GPI_Anchor	E2F1	0.00777473	LUAD
GPI_Anchor	IRF3	0.00777473	LUAD
sulfated_glycans	PML	0.0193968	LUAD
Terminal_Fucose	ADNP	0.0272232	LUAD
Terminal_Fucose	SPDEF	0.0272232	LUAD
LacdiNAc	GATA6	0.0429661	LUAD
LacdiNAc	MEF2C	0.0429661	LUAD
LacdiNAc	TP63	0.0216796	LUAD
Blood_Groups	RING1	0.00907441	LUAD
SA_paths	CBX7	0.00297936	LUAD
SA_paths	ERG	0.00943057	LUAD
SA_paths	IRF4	0.02677	LUAD
SA_paths	MAF	0.00704806	LUAD
Type_1_2_LacNAc	GTF3C2	0.0254083	LUAD
Type_1_2_LacNAc	NR0B2	0.0254083	LUAD
Type_1_2_LacNAc	SETDB1	0.0254083	LUAD
O_fucose	IRF4	0.0497576	LUAD
O_mannose	DNMT3A	0.00152367	LUAD
O_mannose	GTF3C2	0.0235935	LUAD
O_mannose	NRF1	0.0235935	LUAD
O_mannose	RXRA	0.0235935	LUAD
O_mannose	SETDB1	0.0235935	LUAD
O_mannose	USF1	0.0466722	LUAD
O_mannose	WDR5	0.0466722	LUAD
HA_Synthesis	ETV1	0.0144795	LUAD
HA_Synthesis	KLF4	0.00725953	LUAD
HS_Extend	FLI1	0.023893	LUAD
HS_Extend	MECP2	0.0226634	LUAD
HS_Extend	NR2C2	0.0226634	LUAD
CS_DS_Extend	STAT1	0.022933	LUAD
CS_DS_Extend	TEAD1	0.0119582	LUAD
GalNAc_Olinked	ETV1	0.0288533	LUAD
GalNAc_Olinked	MEF2C	0.00109263	LUAD
GalNAc_Olinked	NFIC	0.0430048	LUAD
GalNAc_Olinked	RUNX1	0.0430048	LUAD
GalNAc_Olinked	SOX2	0.0288533	LUAD
GalNAc_Olinked	VDR	0.0288533	LUAD
N_linked_branching	NOTCH1	0.0344828	LUAD
N_linked_branching	SNAPC1	0.0344828	LUAD
N_linked_branching	YY1	0.0344828	LUAD
Complex_Nlinked	SMC1A	0.022108	LUAD
Dolichol	FOXM1	0.0447051	LUAD
Dolichol	MYBL2	0.00321169	LUAD
Dolichol	NCAPG	0.0447051	LUAD
Dolichol	XBP1	0.00514767	LUAD
Gangliosides	CBX7	0.0310698	LUAD
Gangliosides	ERG	0.00582554	LUAD
Gangliosides	LMO2	0.0448693	LUAD
Gangliosides	MAF	0.0297513	LUAD
P1PK_BloodGroup	DNMT3A	0.0430048	LUAD
P1PK_BloodGroup	EZH2	0.0430048	LUAD
P1PK_BloodGroup	FOSL1	0.0288533	LUAD
P1PK_BloodGroup	GTF3C2	0.0145191	LUAD
P1PK_BloodGroup	SETDB1	0.0145191	LUAD
P1PK_BloodGroup	USF1	0.0288533	LUAD
GSL_Core	DNMT3A	0.0323716	LUAD
GSL_Core	GTF3C2	0.0108893	LUAD
GSL_Core	HNF1B	0.0216796	LUAD
GSL_Core	NKX2.1	0.0429661	LUAD
GSL_Core	SETDB1	0.0108893	LUAD
GSL_Core	USF1	0.0216796	LUAD
Terminal_Fucose	ADNP	0.0340136	LUSC
Terminal_Fucose	PML	0.0340136	LUSC
LacdiNAc	BRD1	0.0404681	LUSC
LacdiNAc	FUS	0.0204082	LUSC
LacdiNAc	NFYC	0.0204082	LUSC
LacdiNAc	NRF1	0.0204082	LUSC
SA_paths	GATA6	0.0418592	LUSC
Type_1_2_LacNAc	SMAD4	0.0102041	LUSC
Type_1_2_LacNAc	SOX2	0.00616472	LUSC
O_fucose	GATA6	0.0483711	LUSC
O_mannose	WDR5	0.0337814	LUSC
HA_Synthesis	FOSL1	0.0102041	LUSC
HA_Synthesis	NR4A1	0.0102041	LUSC
HS_Extend	BCL3	0.0408163	LUSC
HS_Extend	ERCC6	0.0408163	LUSC
HS_Extend	NR2C2	0.0408163	LUSC
CS_DS_Extend	GATA3	0.0230526	LUSC
GalNAc_Olinked	MECOM	0.0170068	LUSC
Complex_Nlinked	NR2F1	0.047619	LUSC
Complex_Nlinked	POU2F2	0.047619	LUSC
Complex_Nlinked	SSRP1	0.047619	LUSC
Complex_Nlinked	TCF21	0.0386259	LUSC
Dolichol	HINFP	0.00355227	LUSC
P1PK_BloodGroup	KLF5	0.0102041	LUSC
P1PK_BloodGroup	SMAD4	0.0102041	LUSC
GSL_Core	SMAD4	0.0340136	LUSC
GPI_Anchor	MAZ	0.0289017	MESO
GPI_Anchor	MBD3	0.0289017	MESO
GPI_Anchor	RAC3	0.0289017	MESO
sulfated_glycans	MEF2D	0.0462428	MESO
sulfated_glycans	MEIS3	0.0462428	MESO
sulfated_glycans	NFYC	0.0462428	MESO
Terminal_Fucose	LYL1	0.0344804	MESO
Terminal_Fucose	TEAD2	0.0230542	MESO
LacdiNAc	BCAT1	0.0115607	MESO
LacdiNAc	FUS	0.0115607	MESO
Blood_Groups	TEAD2	0.0115607	MESO
SA_paths	CIITA	0.0404624	MESO
SA_paths	LMO2	0.0404624	MESO
SA_paths	MEIS3	0.0404624	MESO
SA_paths	NFYC	0.0404624	MESO
Type_1_2_LacNAc	BCAT1	0.017341	MESO
Type_1_2_LacNAc	MEF2D	0.017341	MESO
O_mannose	ATF5	0.0344804	MESO
O_mannose	MEF2D	0.0115607	MESO
CS_DS_Extend	BATF3	0.0486294	MESO
CS_DS_Extend	ERG	0.0486294	MESO
CS_DS_Extend	RUNX1	0.000801843	MESO
CS_HS_Init	HEXIM1	0.0346821	MESO
GalNAc_Olinked	BCAT1	0.0231214	MESO
N_linked_branching	MXD3	0.0289017	MESO
N_linked_branching	SNAPC1	0.0289017	MESO
Complex_Nlinked	ATF2	0.0353362	MESO
Complex_Nlinked	NIPBL	0.0356231	MESO
Dolichol	KDM5A	0.00914101	MESO
Gangliosides	MEIS3	0.0289017	MESO
Gangliosides	MYBL2	0.0289017	MESO
Gangliosides	NFYC	0.0289017	MESO
P1PK_BloodGroup	DEK	0.0344804	MESO
P1PK_BloodGroup	MEF2D	0.0115607	MESO
GSL_Core	AHR	0.0404624	MESO
GSL_Core	HJURP	0.0404624	MESO
GSL_Core	MEF2D	0.0404624	MESO
GPI_Anchor	RNF2	0.0159011	OV
sulfated_glycans	CIITA	0.00282805	OV
sulfated_glycans	FOXP3	0.0372597	OV
Terminal_Fucose	NFATC1	0.032967	OV
Terminal_Fucose	TFAP2C	0.032967	OV
LacdiNAc	AR	0.014652	OV
LacdiNAc	CPSF3L	0.0291424	OV
LacdiNAc	KDM5B	0.0291424	OV
Blood_Groups	AR	0.010989	OV
Blood_Groups	ESRRA	0.0327249	OV
Blood_Groups	TFAP2C	0.010989	OV
Type_1_2_LacNAc	AR	0.014652	OV
Type_1_2_LacNAc	USF1	0.014652	OV
O_fucose	NFYC	0.040293	OV
O_fucose	PHF20	0.040293	OV
O_fucose	USF1	0.040293	OV
HA_Synthesis	EGR2	0.0218972	OV
HA_Synthesis	FOSL2	0.0434724	OV
HS_Extend	E2F6	0.03663	OV
HS_Extend	ERCC6	0.03663	OV
HS_Extend	NCOR2	0.03663	OV
CS_DS_Extend	ETV1	0.0156085	OV
CS_DS_Extend	RUNX1	0.0191736	OV
CS_HS_Init	RUNX1	0.0421554	OV
GalNAc_Olinked	FOSL2	0.00849897	OV
GalNAc_Olinked	VDR	0.0278147	OV
N_linked_branching	FOXK1	0.00732601	OV
Dolichol	HINFP	0.00681426	OV
Gangliosides	NFYC	0.047619	OV
P1PK_BloodGroup	RUNX1	0.00237654	OV
P1PK_BloodGroup	USF1	0.014652	OV
GSL_Core	NR2F1	0.0363607	OV
GSL_Core	USF1	0.00732601	OV
GPI_Anchor	CDK9	0.0227933	PAAD
GPI_Anchor	CTBP2	0.0436154	PAAD
GPI_Anchor	ERF	0.0302193	PAAD
GPI_Anchor	IRF3	0.00880039	PAAD
GPI_Anchor	JUNB	0.0436154	PAAD
sulfated_glycans	CIITA	0.0115159	PAAD
sulfated_glycans	EBF1	0.000169998	PAAD
sulfated_glycans	ELL	0.0454048	PAAD
sulfated_glycans	ERG	0.00908785	PAAD
sulfated_glycans	FOXP3	0.0271264	PAAD
sulfated_glycans	HOXA4	0.0454048	PAAD
sulfated_glycans	LMO2	0.0477305	PAAD
sulfated_glycans	NFATC1	0.000418745	PAAD
sulfated_glycans	PIAS4	0.0454048	PAAD
sulfated_glycans	SPIB	0.0454048	PAAD
sulfated_glycans	TCF21	0.0228614	PAAD
Terminal_Fucose	CEBPG	0.0494261	PAAD
Terminal_Fucose	CIITA	0.0494261	PAAD
Terminal_Fucose	GATA6	0.00405104	PAAD
Terminal_Fucose	HES1	0.0372934	PAAD
Terminal_Fucose	HNF4A	0.0439301	PAAD
Terminal_Fucose	HNF4G	0.0326413	PAAD
Terminal_Fucose	OVOL2	0.0250126	PAAD
Terminal_Fucose	PIAS4	0.0125821	PAAD
Terminal_Fucose	SPDEF	0.0250126	PAAD
Terminal_Fucose	SPIB	0.0125821	PAAD
LacdiNAc	HNF4A	0.012394	PAAD
LacdiNAc	HNF4G	0.0422646	PAAD
LacdiNAc	HOXA13	0.0344639	PAAD
LacdiNAc	KAT2B	0.0108257	PAAD
LacdiNAc	PAX6	0.021957	PAAD
LacdiNAc	RXRG	0.0286321	PAAD
LacdiNAc	SMAD3	0.0440214	PAAD
LacdiNAc	SOX9	0.036005	PAAD
Blood_Groups	HNF4A	0.00980995	PAAD
Blood_Groups	HOXA13	0.0169584	PAAD
Blood_Groups	SPDEF	0.0336384	PAAD
SA_paths	EBF1	0.00405302	PAAD
SA_paths	ERG	0.00318028	PAAD
SA_paths	FLI1	6.22082e-05	PAAD
SA_paths	FOXO1	0.0154041	PAAD
SA_paths	FOXP3	0.00306927	PAAD
SA_paths	IKZF1	0.00098455	PAAD
SA_paths	IRF4	0.0263401	PAAD
SA_paths	LEF1	0.0191275	PAAD
SA_paths	LMO2	0.00790796	PAAD
SA_paths	MAF	0.00629024	PAAD
SA_paths	MEIS3	0.00314574	PAAD
SA_paths	PRDM1	0.0263401	PAAD
SA_paths	STAT4	0.00629024	PAAD
SA_paths	TCF21	0.0401563	PAAD
Type_1_2_LacNAc	ESRRA	0.0274919	PAAD
Type_1_2_LacNAc	GRHL2	0.0178296	PAAD
Type_1_2_LacNAc	GTF2F1	0.0212942	PAAD
Type_1_2_LacNAc	HJURP	0.0486871	PAAD
Type_1_2_LacNAc	HNF4A	0.0084286	PAAD
Type_1_2_LacNAc	HOXA13	0.0486871	PAAD
Type_1_2_LacNAc	HSF1	0.0116003	PAAD
Type_1_2_LacNAc	RCOR1	0.0419581	PAAD
Type_1_2_LacNAc	SIRT6	0.0331789	PAAD
Type_1_2_LacNAc	SMAD3	0.0104389	PAAD
O_fucose	CAMTA2	0.0107188	PAAD
O_fucose	CEBPB	0.0195775	PAAD
O_fucose	FLI1	0.0301646	PAAD
O_fucose	IKZF1	0.0107698	PAAD
O_fucose	NCOR2	0.0474506	PAAD
O_fucose	RARA	0.0205808	PAAD
O_fucose	STAT2	0.0329371	PAAD
O_mannose	HSF1	0.0174002	PAAD
O_mannose	MEF2D	0.0324825	PAAD
O_mannose	TAF7	0.0324825	PAAD
O_mannose	ZBTB17	0.00195946	PAAD
HA_Synthesis	IRF4	0.0324297	PAAD
HA_Synthesis	NFATC1	0.0244023	PAAD
HA_Synthesis	NR4A1	0.00273523	PAAD
HA_Synthesis	TCF7L2	0.0324297	PAAD
HS_Extend	FOXO1	0.0418911	PAAD
HS_Extend	MAFF	0.0497812	PAAD
HS_Extend	MECP2	0.0222176	PAAD
HS_Extend	NOTCH1	0.0322559	PAAD
HS_Extend	PBX3	0.0291417	PAAD
HS_Extend	TEAD1	0.0102765	PAAD
CS_DS_Extend	ETS1	0.0357415	PAAD
CS_DS_Extend	FOSL2	0.012884	PAAD
CS_DS_Extend	FOXO1	0.0309781	PAAD
CS_DS_Extend	HEY1	0.0392652	PAAD
CS_DS_Extend	LEF1	0.0343491	PAAD
CS_DS_Extend	NCOR2	0.00511894	PAAD
CS_DS_Extend	NFYB	0.00110662	PAAD
CS_DS_Extend	PRDM1	0.000687155	PAAD
CS_DS_Extend	RUNX1	0.00687805	PAAD
CS_DS_Extend	TEAD1	0.0285657	PAAD
CS_HS_Init	CTBP1	0.0115159	PAAD
CS_HS_Init	NFYB	0.0477305	PAAD
CS_HS_Init	NR1H2	0.0387252	PAAD
GalNAc_Olinked	BHLHE40	0.00339606	PAAD
GalNAc_Olinked	FOXA1	0.000152196	PAAD
GalNAc_Olinked	GATAD1	0.0227933	PAAD
GalNAc_Olinked	GRHL2	0.00381355	PAAD
GalNAc_Olinked	HNF4A	0.000648755	PAAD
GalNAc_Olinked	HNF4G	0.0414953	PAAD
GalNAc_Olinked	KLF5	4.99126e-05	PAAD
GalNAc_Olinked	MECOM	0.000152196	PAAD
GalNAc_Olinked	PDX1	0.0097976	PAAD
GalNAc_Olinked	PPARG	0.0188475	PAAD
GalNAc_Olinked	SMAD3	0.0173027	PAAD
GalNAc_Olinked	SRC	0.0476195	PAAD
GalNAc_Olinked	TCF7L2	1.20698e-06	PAAD
N_linked_branching	BATF3	0.0368632	PAAD
N_linked_branching	SREBF2	0.0185996	PAAD
Complex_Nlinked	ERCC6	0.026593	PAAD
Complex_Nlinked	POLR2B	0.0409311	PAAD
Dolichol	BRD1	0.0473381	PAAD
Dolichol	BRD7	0.0156854	PAAD
Dolichol	CDK7	0.0242602	PAAD
Dolichol	CHD8	0.0263975	PAAD
Dolichol	EHF	0.0170911	PAAD
Dolichol	SUMO1	0.0263975	PAAD
Gangliosides	EBF1	0.00768274	PAAD
Gangliosides	ELL	0.0410284	PAAD
Gangliosides	ERG	0.00634077	PAAD
Gangliosides	FLI1	0.000972884	PAAD
Gangliosides	FOXO1	0.0223964	PAAD
Gangliosides	FOXP3	0.0223851	PAAD
Gangliosides	HOXA4	0.0410284	PAAD
Gangliosides	IKZF1	0.0211509	PAAD
Gangliosides	LMO2	0.0396177	PAAD
Gangliosides	MAF	0.00154926	PAAD
Gangliosides	MEIS3	0.0016618	PAAD
Gangliosides	MSX1	0.0410284	PAAD
Gangliosides	NFATC1	0.0496045	PAAD
Gangliosides	PRDM1	0.0111739	PAAD
Gangliosides	STAT4	0.0108996	PAAD
Gangliosides	TCF21	0.0174268	PAAD
P1PK_BloodGroup	CEBPB	0.0108001	PAAD
P1PK_BloodGroup	HSF1	0.0374534	PAAD
P1PK_BloodGroup	MEF2D	0.0484566	PAAD
P1PK_BloodGroup	TAF7	0.0484566	PAAD
GPI_Anchor	CTBP1	0.0474777	PCPG
GPI_Anchor	HSF1	0.00898136	PCPG
GPI_Anchor	SP2	0.0458316	PCPG
GPI_Anchor	SUMO2	0.025285	PCPG
sulfated_glycans	ERG	0.0471305	PCPG
sulfated_glycans	ETS1	0.0271157	PCPG
sulfated_glycans	FLI1	0.039979	PCPG
sulfated_glycans	GATA6	0.0300885	PCPG
sulfated_glycans	TBX3	0.0300885	PCPG
Terminal_Fucose	FEV	0.0316325	PCPG
Terminal_Fucose	MYBL1	0.0159292	PCPG
Terminal_Fucose	TAL1	0.0316325	PCPG
LacdiNAc	EGLN2	0.0159292	PCPG
LacdiNAc	MTA3	0.0316325	PCPG
LacdiNAc	NRF1	0.0471126	PCPG
LacdiNAc	POU2F2	0.0159292	PCPG
LacdiNAc	RBPJ	0.0471126	PCPG
LacdiNAc	SOX10	0.0316325	PCPG
Blood_Groups	EGLN2	0.0176991	PCPG
Blood_Groups	MYBL1	0.0176991	PCPG
Blood_Groups	SOX10	0.0351158	PCPG
Blood_Groups	TAL1	0.0351158	PCPG
SA_paths	CBFA2T3	0.0455281	PCPG
SA_paths	ERG	0.028346	PCPG
SA_paths	ETS1	0.000741151	PCPG
SA_paths	FLI1	0.0239324	PCPG
SA_paths	SOX10	0.0455281	PCPG
SA_paths	SOX17	0.0455281	PCPG
SA_paths	TBX3	0.0230088	PCPG
Type_1_2_LacNAc	ATF3	0.0318584	PCPG
Type_1_2_LacNAc	EGLN2	0.0318584	PCPG
Type_1_2_LacNAc	GATA6	0.0318584	PCPG
Type_1_2_LacNAc	MAFF	0.00282623	PCPG
Type_1_2_LacNAc	POU2F2	0.0318584	PCPG
Type_1_2_LacNAc	RBCK1	0.0318584	PCPG
O_fucose	ERG	0.0100179	PCPG
O_fucose	ETS1	0.00303743	PCPG
O_fucose	FLI1	0.007079	PCPG
O_mannose	GATA6	0.019469	PCPG
HA_Synthesis	FOSL2	0.000112706	PCPG
HA_Synthesis	MAFF	0.0158728	PCPG
HS_Extend	TET2	0.0353982	PCPG
CS_DS_Extend	CBFB	0.000571142	PCPG
CS_DS_Extend	ERG	0.0326797	PCPG
CS_HS_Init	ATF1	0.0441717	PCPG
CS_HS_Init	PHF6	0.0389381	PCPG
GalNAc_Olinked	CBFA2T3	0.0455281	PCPG
GalNAc_Olinked	MTA3	0.0455281	PCPG
GalNAc_Olinked	POU2F2	0.0230088	PCPG
GalNAc_Olinked	SOX10	0.0455281	PCPG
N_linked_branching	BATF3	0.0471126	PCPG
N_linked_branching	KDM3A	0.0316325	PCPG
N_linked_branching	NRF1	0.0471126	PCPG
N_linked_branching	PRDM4	0.0316325	PCPG
Complex_Nlinked	AFF4	0.0414606	PCPG
Complex_Nlinked	ATF2	0.0317787	PCPG
Complex_Nlinked	POLR2B	0.0317787	PCPG
Complex_Nlinked	POLR3A	0.0375889	PCPG
Dolichol	CASP8AP2	0.00724369	PCPG
Dolichol	EED	0.0160422	PCPG
Dolichol	MZF1	0.0160422	PCPG
Gangliosides	CD59	0.00884956	PCPG
Gangliosides	CHD4	0.0436235	PCPG
Gangliosides	SOX17	0.0176364	PCPG
Gangliosides	TBX3	0.00884956	PCPG
P1PK_BloodGroup	ATF3	0.0318584	PCPG
P1PK_BloodGroup	ETS1	0.0302514	PCPG
P1PK_BloodGroup	FLI1	0.0444976	PCPG
P1PK_BloodGroup	GATA6	0.0318584	PCPG
P1PK_BloodGroup	MAFF	0.00282623	PCPG
P1PK_BloodGroup	MBD3	0.0302514	PCPG
P1PK_BloodGroup	MSX1	0.0318584	PCPG
GSL_Core	HECTD1	0.0455281	PCPG
GSL_Core	SNAPC5	0.0230088	PCPG
GSL_Core	TBX3	0.0230088	PCPG
GPI_Anchor	HSF1	0.00551421	PRAD
sulfated_glycans	FOXO1	0.0181016	PRAD
sulfated_glycans	MEF2A	0.04862	PRAD
sulfated_glycans	STAT5B	0.0150685	PRAD
Terminal_Fucose	GATA3	0.00332377	PRAD
Terminal_Fucose	VEZF1	0.0459886	PRAD
LacdiNAc	USF2	0.0143478	PRAD
Blood_Groups	CREB3	0.0257941	PRAD
Blood_Groups	GATA3	0.00960814	PRAD
Blood_Groups	TP63	0.00582179	PRAD
SA_paths	ETS2	0.0493934	PRAD
SA_paths	MEF2A	0.0429051	PRAD
SA_paths	MEIS1	0.0474594	PRAD
SA_paths	MYH11	0.0143361	PRAD
SA_paths	NR5A2	0.0217788	PRAD
SA_paths	TCF7L1	0.0143361	PRAD
Type_1_2_LacNAc	GATA3	0.00915628	PRAD
Type_1_2_LacNAc	GRHL1	0.0485269	PRAD
Type_1_2_LacNAc	KLF5	0.021052	PRAD
Type_1_2_LacNAc	PBX1	0.0453757	PRAD
Type_1_2_LacNAc	RORA	0.0485269	PRAD
Type_1_2_LacNAc	SOX9	0.0485269	PRAD
Type_1_2_LacNAc	STAT5B	0.0111841	PRAD
Type_1_2_LacNAc	TP63	0.0269263	PRAD
O_fucose	LDB1	0.00439814	PRAD
O_mannose	KDM6B	0.0343765	PRAD
O_mannose	RORA	0.017331	PRAD
O_mannose	STAT3	0.0409137	PRAD
HA_Synthesis	ATF3	0.00953206	PRAD
HA_Synthesis	JUN	0.00953206	PRAD
HA_Synthesis	KLF5	0.04684	PRAD
HA_Synthesis	SRF	0.0070662	PRAD
HS_Extend	EZH1	0.0340951	PRAD
HS_Extend	PRKDC	0.0178406	PRAD
HS_Extend	YAP1	0.0489018	PRAD
CS_DS_Extend	CBX7	0.0181328	PRAD
CS_DS_Extend	FOXO1	0.00507076	PRAD
CS_DS_Extend	RUNX2	0.0313352	PRAD
CS_DS_Extend	STAT5B	0.0229261	PRAD
CS_DS_Extend	TCF21	0.0463077	PRAD
CS_DS_Extend	TCF7	0.0132547	PRAD
CS_DS_Extend	YAP1	0.0452048	PRAD
CS_HS_Init	C17orf49	0.0381282	PRAD
CS_HS_Init	CPSF3L	0.0264207	PRAD
CS_HS_Init	MBD3	0.0193372	PRAD
CS_HS_Init	SIRT6	0.0264207	PRAD
CS_HS_Init	TERF1	0.0193372	PRAD
GalNAc_Olinked	GATA3	0.011683	PRAD
GalNAc_Olinked	SOX2	0.00266053	PRAD
GalNAc_Olinked	TCF7L1	0.0171072	PRAD
N_linked_branching	CEBPD	0.0428766	PRAD
N_linked_branching	DNMT3A	0.0428766	PRAD
N_linked_branching	EGLN2	0.0216638	PRAD
N_linked_branching	NR2F2	0.0303767	PRAD
N_linked_branching	PRDM4	0.0428766	PRAD
Complex_Nlinked	ERCC6	0.0199047	PRAD
Complex_Nlinked	KDM4C	0.0314986	PRAD
Complex_Nlinked	KDM5B	0.0314986	PRAD
Complex_Nlinked	POLR2B	0.0129337	PRAD
Complex_Nlinked	XRN2	0.0314986	PRAD
Dolichol	BRD3	0.0434113	PRAD
Dolichol	CEBPA	0.00983813	PRAD
Dolichol	HBP1	0.0309723	PRAD
Gangliosides	EBF1	0.0355114	PRAD
Gangliosides	ETS2	0.0415945	PRAD
Gangliosides	MEF2A	0.0311363	PRAD
Gangliosides	MEIS1	0.030468	PRAD
Gangliosides	MYH11	0.00781821	PRAD
Gangliosides	NR2F1	0.0355114	PRAD
Gangliosides	TCF7L1	0.046809	PRAD
P1PK_BloodGroup	GRHL1	0.0242634	PRAD
P1PK_BloodGroup	KDM6B	0.0479587	PRAD
P1PK_BloodGroup	KLF11	0.0272835	PRAD
P1PK_BloodGroup	NR1H3	0.0242634	PRAD
P1PK_BloodGroup	RORA	0.0242634	PRAD
P1PK_BloodGroup	SOX9	0.0242634	PRAD
GSL_Core	CTNNB1	0.0422076	PRAD
GSL_Core	KDM6B	0.00111382	PRAD
GSL_Core	RORA	0.0337955	PRAD
GPI_Anchor	CDK9	0.0260015	SARC
GPI_Anchor	EZH2	0.00138659	SARC
sulfated_glycans	ADNP	0.0344828	SARC
sulfated_glycans	FOXP3	0.0344828	SARC
sulfated_glycans	NFYC	0.0344828	SARC
Terminal_Fucose	ADNP	0.0198939	SARC
Terminal_Fucose	ERG	0.0394179	SARC
Terminal_Fucose	FOXP3	0.0198939	SARC
LacdiNAc	BCAT1	0.047051	SARC
LacdiNAc	CPSF3L	0.047051	SARC
LacdiNAc	MBD2	0.047051	SARC
LacdiNAc	MEIS1	0.0159151	SARC
LacdiNAc	NR1H2	0.0159151	SARC
Blood_Groups	ERG	0.0237459	SARC
Blood_Groups	NR1H2	0.0119363	SARC
SA_paths	CDK9	0.0191781	SARC
SA_paths	IKZF1	0.0338751	SARC
SA_paths	IRF2	0.0464191	SARC
SA_paths	KLF15	0.0464191	SARC
SA_paths	MAX	0.0464191	SARC
SA_paths	MEF2C	0.0464191	SARC
SA_paths	NFYC	0.0464191	SARC
Type_1_2_LacNAc	IRF5	0.0470438	SARC
Type_1_2_LacNAc	NR1H2	0.0198939	SARC
O_fucose	CBFA2T3	0.00221924	SARC
O_fucose	IKZF1	0.0364733	SARC
O_fucose	IRF2	0.0477454	SARC
O_fucose	KLF15	0.0477454	SARC
O_fucose	MAX	0.0477454	SARC
O_fucose	MEF2C	0.0477454	SARC
O_fucose	NFYC	0.0477454	SARC
O_fucose	STAT5A	0.029469	SARC
O_mannose	THAP1	0.0446138	SARC
HA_Synthesis	SVIL	0.028984	SARC
HS_Extend	BACH2	0.047051	SARC
HS_Extend	GLI2	0.0315977	SARC
HS_Extend	MAF	0.0315977	SARC
CS_DS_Extend	CBFB	0.0216411	SARC
CS_DS_Extend	EBF1	0.0238727	SARC
CS_DS_Extend	HEY1	0.0238727	SARC
CS_DS_Extend	PPARG	0.0472064	SARC
CS_DS_Extend	RUNX1	0.0308526	SARC
CS_HS_Init	IRF3	0.0103685	SARC
GalNAc_Olinked	IRF8	0.0289131	SARC
GalNAc_Olinked	RUNX2	0.0497955	SARC
GalNAc_Olinked	SOX11	0.0251989	SARC
GalNAc_Olinked	ZBTB2	0.0251989	SARC
N_linked_branching	CEBPD	0.0265252	SARC
N_linked_branching	PRDM1	0.0265252	SARC
Complex_Nlinked	ATF2	0.0407971	SARC
Complex_Nlinked	SP2	0.0256021	SARC
Dolichol	EBNA1BP2	0.0277405	SARC
Dolichol	JUND	0.0277405	SARC
Dolichol	SIRT6	0.0172993	SARC
Gangliosides	CBFA2T3	0.0394179	SARC
Gangliosides	CDK9	0.00357238	SARC
Gangliosides	GLI2	0.0394179	SARC
Gangliosides	LYL1	0.0377559	SARC
Gangliosides	NFYC	0.0198939	SARC
P1PK_BloodGroup	BMI1	0.0328056	SARC
P1PK_BloodGroup	MYC	0.0328056	SARC
P1PK_BloodGroup	RNF2	0.00310438	SARC
P1PK_BloodGroup	SMAD1	0.0328056	SARC
GSL_Core	CBFA2T3	0.0394179	SARC
GPI_Anchor	IRF4	0.00822369	SKCM
GPI_Anchor	MXI1	0.0308123	SKCM
GPI_Anchor	NFYA	0.0308123	SKCM
Terminal_Fucose	ADNP	0.0308123	SKCM
Terminal_Fucose	IRF3	0.0308123	SKCM
LacdiNAc	BCAT1	0.0252101	SKCM
Blood_Groups	TCF12	0.0112045	SKCM
SA_paths	PRDM1	0.0353001	SKCM
Type_1_2_LacNAc	BCAT1	0.0448179	SKCM
Type_1_2_LacNAc	CREB3L4	0.0448179	SKCM
Type_1_2_LacNAc	MAZ	0.0448179	SKCM
Type_1_2_LacNAc	MEF2D	0.0448179	SKCM
Type_1_2_LacNAc	VDR	0.0448179	SKCM
O_mannose	CREB3L4	0.0252101	SKCM
O_mannose	MAZ	0.0252101	SKCM
O_mannose	MEF2D	0.0252101	SKCM
O_mannose	VDR	0.0252101	SKCM
HS_Extend	EBF1	0.0166911	SKCM
HS_Extend	POLR2B	0.00255266	SKCM
CS_DS_Extend	LYL1	0.0381913	SKCM
CS_DS_Extend	MAFB	0.0364146	SKCM
CS_HS_Init	KAT5	0.0280112	SKCM
CS_HS_Init	RNF2	0.0280112	SKCM
GalNAc_Olinked	BCAT1	0.0392157	SKCM
GalNAc_Olinked	GREB1	0.0392157	SKCM
GalNAc_Olinked	MEF2B	0.0392157	SKCM
N_linked_branching	DICER1	0.0280112	SKCM
Complex_Nlinked	ATF2	0.0308984	SKCM
Dolichol	ATF7IP	0.0142102	SKCM
Dolichol	VEZF1	0.0142102	SKCM
Gangliosides	KAT2B	0.0336134	SKCM
Gangliosides	LYL1	0.0327479	SKCM
Gangliosides	PRDM1	0.00981213	SKCM
P1PK_BloodGroup	CREB3L4	0.0140056	SKCM
P1PK_BloodGroup	MAZ	0.0140056	SKCM
P1PK_BloodGroup	MEF2D	0.0140056	SKCM
P1PK_BloodGroup	VDR	0.0140056	SKCM
GSL_Core	CREB3L4	0.0196078	SKCM
GSL_Core	ETS1	0.0196078	SKCM
GSL_Core	KAT2B	0.0196078	SKCM
GSL_Core	MEF2D	0.0196078	SKCM
GPI_Anchor	BRCA1	0.00319001	STES.
GPI_Anchor	CBX3	0.0291615	STES.
GPI_Anchor	WDR5	0.00942742	STES.
sulfated_glycans	FLI1	0.0462445	STES.
sulfated_glycans	MEF2B	0.00783403	STES.
Terminal_Fucose	ADNP	0.0112923	STES.
Terminal_Fucose	CIITA	0.0335376	STES.
Terminal_Fucose	GATA6	0.0112923	STES.
Terminal_Fucose	MEF2B	0.0224712	STES.
LacdiNAc	CPSF3L	0.0138018	STES.
LacdiNAc	EHMT2	0.0274301	STES.
SA_paths	EBF1	0.0430282	STES.
SA_paths	FLI1	0.0185683	STES.
SA_paths	GATA3	0.0235057	STES.
SA_paths	LMO2	0.0289889	STES.
SA_paths	LYL1	0.0282001	STES.
SA_paths	MAF	0.0028072	STES.
SA_paths	STAT5B	0.0195708	STES.
Type_1_2_LacNAc	CEBPA	0.0200753	STES.
Type_1_2_LacNAc	GRHL1	0.0200753	STES.
Type_1_2_LacNAc	HNF1B	0.0200753	STES.
Type_1_2_LacNAc	HOXA13	0.0200753	STES.
Type_1_2_LacNAc	HSF1	0.00986889	STES.
Type_1_2_LacNAc	MAZ	0.0259227	STES.
O_fucose	HSF1	0.0317236	STES.
O_fucose	SPIB	0.0246382	STES.
O_mannose	HNF1B	0.0263488	STES.
O_mannose	HSF1	0.0168384	STES.
O_mannose	MAZ	0.0433192	STES.
HA_Synthesis	FOXO1	0.0224712	STES.
HA_Synthesis	NR4A1	0.0112923	STES.
HS_Extend	FLI1	0.0471843	STES.
HS_Extend	PRDM1	0.0355463	STES.
HS_Extend	ZBTB33	0.0355463	STES.
CS_DS_Extend	LMO2	0.0191455	STES.
CS_DS_Extend	NR2F2	0.00765207	STES.
CS_DS_Extend	PBX3	0.00258209	STES.
CS_DS_Extend	TEAD1	0.0167946	STES.
CS_HS_Init	BACH1	0.0476788	STES.
CS_HS_Init	C17orf49	0.0476788	STES.
CS_HS_Init	CTBP1	0.00221623	STES.
CS_HS_Init	ELK4	0.0476788	STES.
CS_HS_Init	FOXK1	0.0476788	STES.
CS_HS_Init	SMARCB1	0.0476788	STES.
CS_HS_Init	TEAD1	0.0202207	STES.
GalNAc_Olinked	AHR	0.0249522	STES.
GalNAc_Olinked	MECOM	0.000141864	STES.
GalNAc_Olinked	RCOR1	0.0493427	STES.
N_linked_branching	GTF2I	0.0408871	STES.
Complex_Nlinked	AFF4	0.0197709	STES.
Complex_Nlinked	ATF2	0.00417327	STES.
Complex_Nlinked	ERCC6	0.00945927	STES.
Complex_Nlinked	HCFC1	0.00503179	STES.
Complex_Nlinked	KDM4A	0.00697023	STES.
Complex_Nlinked	POLR3A	0.0155631	STES.
Dolichol	CBX3	0.00671382	STES.
Dolichol	E2F1	0.00133524	STES.
Dolichol	E2F7	0.0240026	STES.
Dolichol	EED	0.00851497	STES.
Dolichol	EHF	0.0240026	STES.
Dolichol	MAZ	0.0256661	STES.
Dolichol	MYBL2	0.0306063	STES.
Dolichol	SMC1A	0.00851497	STES.
Dolichol	SUMO2	0.00851497	STES.
Gangliosides	MAF	0.00321479	STES.
Gangliosides	SPIB	0.0358383	STES.
Gangliosides	STAT5B	0.0383504	STES.
P1PK_BloodGroup	CBFA2T3	0.0250941	STES.
P1PK_BloodGroup	GRHL1	0.0250941	STES.
P1PK_BloodGroup	HNF1B	0.0250941	STES.
P1PK_BloodGroup	HSF1	0.0153122	STES.
P1PK_BloodGroup	MAZ	0.0395567	STES.
GSL_Core	FOSL2	0.0326223	STES.
GSL_Core	HECTD1	0.0326223	STES.
GSL_Core	HNF1B	0.0326223	STES.
GSL_Core	STAT3	0.0326223	STES.
GPI_Anchor	FANCD2	0.0284872	TGCT
GPI_Anchor	PCGF6	0.0284872	TGCT
GPI_Anchor	SIRT6	0.0284872	TGCT
GPI_Anchor	SP2	0.0284872	TGCT
GPI_Anchor	TFAM	0.0284872	TGCT
sulfated_glycans	EHMT2	0.034462	TGCT
sulfated_glycans	ETS1	0.0255556	TGCT
sulfated_glycans	PML	0.0407118	TGCT
Terminal_Fucose	ADNP	0.0255403	TGCT
Terminal_Fucose	SPIB	0.0255403	TGCT
LacdiNAc	C17orf49	0.0466181	TGCT
LacdiNAc	HDAC8	0.0466181	TGCT
LacdiNAc	RUNX3	0.0235756	TGCT
LacdiNAc	STAT5A	0.0173427	TGCT
LacdiNAc	YBX1	0.0235756	TGCT
Blood_Groups	C17orf49	0.0312024	TGCT
Blood_Groups	RUNX3	0.0157171	TGCT
Blood_Groups	STAT5A	0.00782394	TGCT
Blood_Groups	TBX21	0.046459	TGCT
SA_paths	ETS1	0.00991164	TGCT
SA_paths	FLI1	0.0224049	TGCT
SA_paths	GLIS3	0.0422397	TGCT
SA_paths	LYL1	0.00914666	TGCT
Type_1_2_LacNAc	HNF4A	0.0361182	TGCT
Type_1_2_LacNAc	PRDM14	0.0361182	TGCT
O_fucose	ETS1	0.0143791	TGCT
O_fucose	PML	0.0231845	TGCT
O_mannose	RBBP5	0.0489981	TGCT
O_mannose	SMARCA4	0.0304519	TGCT
HA_Synthesis	ARID3A	0.0195307	TGCT
HA_Synthesis	ETV4	0.0146769	TGCT
HA_Synthesis	GRHL3	0.0291809	TGCT
HS_Extend	DLX4	0.0265226	TGCT
HS_Extend	FOXK1	0.0265226	TGCT
HS_Extend	GRHL3	0.000316258	TGCT
HS_Extend	MECP2	0.0217519	TGCT
HS_Extend	TCF7L1	0.0379692	TGCT
CS_DS_Extend	EBF1	0.0485364	TGCT
CS_DS_Extend	GATA6	0.00818096	TGCT
CS_DS_Extend	HEXIM1	0.024558	TGCT
CS_DS_Extend	NFYC	0.0485364	TGCT
CS_DS_Extend	TCF21	0.000579539	TGCT
CS_HS_Init	CCNT2	0.0373281	TGCT
CS_HS_Init	MBD3	0.0373281	TGCT
CS_HS_Init	USF1	0.00776833	TGCT
GalNAc_Olinked	EHMT2	0.00392718	TGCT
GalNAc_Olinked	GLIS3	0.0314342	TGCT
GalNAc_Olinked	JARID2	0.0132767	TGCT
GalNAc_Olinked	PRDM1	0.00512468	TGCT
GalNAc_Olinked	TCF7L1	0.00512468	TGCT
N_linked_branching	INO80	0.043222	TGCT
N_linked_branching	L3MBTL2	0.043222	TGCT
N_linked_branching	SMAD3	0.039037	TGCT
Complex_Nlinked	HIRA	0.0329843	TGCT
Dolichol	E2F7	0.0403719	TGCT
Dolichol	GABPA	0.0261926	TGCT
Dolichol	GLYR1	0.0403719	TGCT
Dolichol	SSRP1	0.0403719	TGCT
Gangliosides	LYL1	0.0391574	TGCT
Gangliosides	SMAD3	0.0139861	TGCT
P1PK_BloodGroup	HNF4A	0.00818096	TGCT
P1PK_BloodGroup	NME2	0.024558	TGCT
P1PK_BloodGroup	SND1	0.0485364	TGCT
P1PK_BloodGroup	TFCP2	0.0485364	TGCT
GSL_Core	HECTD1	0.0133198	TGCT
GSL_Core	POLR3D	0.00687575	TGCT
GSL_Core	RCOR1	0.0491159	TGCT
GSL_Core	TTF1	0.0491159	TGCT
GPI_Anchor	GLYR1	0.0387786	THCA
GPI_Anchor	GMEB2	0.0127098	THCA
GPI_Anchor	MZF1	0.0243167	THCA
GPI_Anchor	TRIM28	0.0126744	THCA
sulfated_glycans	CIITA	0.0147019	THCA
sulfated_glycans	IRF5	0.0418246	THCA
sulfated_glycans	RUNX1	0.0336442	THCA
sulfated_glycans	STAT4	0.0263907	THCA
sulfated_glycans	TAL1	0.0200763	THCA
sulfated_glycans	TFAP2C	0.00323795	THCA
Terminal_Fucose	ADNP	0.0220408	THCA
Terminal_Fucose	CIITA	0.0153162	THCA
Terminal_Fucose	IRF5	0.000117225	THCA
Terminal_Fucose	PML	0.00918144	THCA
Terminal_Fucose	RUNX1	0.0269576	THCA
Terminal_Fucose	STAT4	0.0227717	THCA
Terminal_Fucose	TFAP2C	0.00140257	THCA
LacdiNAc	BACH1	0.0460694	THCA
LacdiNAc	CDK9	0.0210417	THCA
LacdiNAc	CPSF3L	0.0325895	THCA
LacdiNAc	CREB3	0.0293878	THCA
LacdiNAc	IRF3	0.00794552	THCA
LacdiNAc	SIRT6	0.0265576	THCA
LacdiNAc	USF1	0.0325895	THCA
Blood_Groups	C17orf49	0.0458495	THCA
Blood_Groups	CREB3	0.0155102	THCA
Blood_Groups	RXRG	0.0458495	THCA
SA_paths	CBFA2T3	0.0310204	THCA
SA_paths	ETS1	0.0129966	THCA
SA_paths	FLI1	2.58621e-05	THCA
SA_paths	FOXP3	0.0162942	THCA
SA_paths	GATA2	0.0178409	THCA
SA_paths	HEXIM1	0.0310204	THCA
SA_paths	LEF1	0.0310204	THCA
SA_paths	TAL1	0.00284627	THCA
Type_1_2_LacNAc	AHR	0.0215461	THCA
Type_1_2_LacNAc	ARNTL	0.0432491	THCA
Type_1_2_LacNAc	BCAT1	0.01123	THCA
Type_1_2_LacNAc	FOSL1	0.0106367	THCA
Type_1_2_LacNAc	KLF5	3.75087e-06	THCA
Type_1_2_LacNAc	MAFF	0.0207981	THCA
Type_1_2_LacNAc	RUNX1	0.000482599	THCA
Type_1_2_LacNAc	TFAP2C	0.00339915	THCA
O_fucose	FLI1	0.0108137	THCA
O_fucose	GATA2	0.0108137	THCA
O_fucose	MSX1	0.0152576	THCA
O_fucose	TAL1	0.00406479	THCA
O_mannose	HEY1	0.0157775	THCA
O_mannose	TGIF1	0.0342857	THCA
HA_Synthesis	FOXP3	0.0291837	THCA
HA_Synthesis	STAT4	0.0178858	THCA
HS_Extend	DDX5	0.0359184	THCA
HS_Extend	ETS1	0.0172585	THCA
HS_Extend	EZH1	0.0359184	THCA
HS_Extend	FOS	0.0359184	THCA
HS_Extend	MED12	0.0236139	THCA
HS_Extend	SMARCC1	0.0472521	THCA
HS_Extend	SRF	0.0359184	THCA
HS_Extend	TAL1	0.0472521	THCA
CS_DS_Extend	GLI3	0.0432653	THCA
CS_DS_Extend	HIF1A	0.0435123	THCA
CS_DS_Extend	KLF15	0.0432653	THCA
CS_DS_Extend	RUNX1	0.01276	THCA
CS_DS_Extend	STAT1	0.0338409	THCA
CS_DS_Extend	STAT2	0.0198547	THCA
CS_DS_Extend	TEAD1	0.0246432	THCA
CS_DS_Extend	TOP1	0.0432653	THCA
CS_HS_Init	AEBP2	0.042449	THCA
CS_HS_Init	CCDC101	0.042449	THCA
CS_HS_Init	PHF6	0.042449	THCA
CS_HS_Init	TRIM28	0.00347756	THCA
GalNAc_Olinked	AHR	0.0100425	THCA
GalNAc_Olinked	FOSL1	0.042009	THCA
GalNAc_Olinked	GRHL1	0.042449	THCA
GalNAc_Olinked	KLF5	0.0152702	THCA
GalNAc_Olinked	MAFB	0.042449	THCA
GalNAc_Olinked	MEF2C	0.0323762	THCA
GalNAc_Olinked	MLLT1	0.042449	THCA
N_linked_branching	CBFB	0.043104	THCA
N_linked_branching	GATA3	0.0261224	THCA
Complex_Nlinked	ATF2	0.011853	THCA
Complex_Nlinked	BRD3	0.0254363	THCA
Complex_Nlinked	CHD2	0.0309348	THCA
Complex_Nlinked	GTF3C2	0.0162697	THCA
Complex_Nlinked	MECP2	0.0254363	THCA
Complex_Nlinked	SIN3A	0.0179313	THCA
Complex_Nlinked	SP2	0.027908	THCA
Dolichol	DEK	0.0118	THCA
Dolichol	KAT5	0.0348258	THCA
Dolichol	MBD3	0.0490397	THCA
Dolichol	NFYC	0.0350228	THCA
Dolichol	SUMO1	9.2733e-05	THCA
Dolichol	TBL1XR1	0.0350228	THCA
Gangliosides	CBFA2T3	0.0228571	THCA
Gangliosides	EBF1	0.00483091	THCA
Gangliosides	HDAC1	0.0336454	THCA
Gangliosides	HEXIM1	0.0228571	THCA
Gangliosides	HEYL	0.0228571	THCA
Gangliosides	LEF1	0.0228571	THCA
Gangliosides	LYL1	0.0336454	THCA
Gangliosides	MYH11	0.0228571	THCA
P1PK_BloodGroup	FOSL1	0.0188611	THCA
P1PK_BloodGroup	KLF5	0.00462372	THCA
P1PK_BloodGroup	MAFF	0.0292753	THCA
P1PK_BloodGroup	RUNX1	0.00362526	THCA
P1PK_BloodGroup	TFAP2C	0.0351651	THCA
P1PK_BloodGroup	TGIF1	0.0277551	THCA
GSL_Core	STAT3	0.0165105	THCA
GSL_Core	TEAD1	0.0165105	THCA
GSL_Core	TGIF1	0.035102	THCA
sulfated_glycans	BATF	0.0477087	THYM
sulfated_glycans	BCAT1	0.0477087	THYM
sulfated_glycans	CHD3	0.0477087	THYM
sulfated_glycans	FOXM1	0.0126636	THYM
sulfated_glycans	IKZF1	0.0403676	THYM
sulfated_glycans	MAFK	0.0126636	THYM
sulfated_glycans	NFATC3	0.0477087	THYM
sulfated_glycans	RUNX3	0.00653368	THYM
sulfated_glycans	SOX4	0.0477087	THYM
sulfated_glycans	SPIB	0.0477087	THYM
sulfated_glycans	TBX21	0.0477087	THYM
sulfated_glycans	TCF7	0.0204562	THYM
Terminal_Fucose	BATF	0.00502197	THYM
Terminal_Fucose	CHD3	0.00502197	THYM
Terminal_Fucose	LYL1	0.0100219	THYM
Terminal_Fucose	RUNX3	0.0149998	THYM
Terminal_Fucose	SPIB	0.00502197	THYM
Terminal_Fucose	STAT5B	0.049236	THYM
Terminal_Fucose	TBX21	0.00502197	THYM
LacdiNAc	EGLN2	0.0274387	THYM
LacdiNAc	PPARGC1A	0.040887	THYM
LacdiNAc	TLE3	0.0138104	THYM
Blood_Groups	EGLN2	0.0125194	THYM
Blood_Groups	H2AFX	0.0248976	THYM
Blood_Groups	HEXIM1	0.0248976	THYM
Blood_Groups	IRF3	0.037136	THYM
Blood_Groups	MAZ	0.0248976	THYM
Blood_Groups	PPARGC1A	0.0187261	THYM
Blood_Groups	TLE3	0.00627746	THYM
Blood_Groups	USF2	0.0432032	THYM
Blood_Groups	ZBTB17	0.0310342	THYM
SA_paths	BACH2	7.4837e-05	THYM
SA_paths	BCAT1	0.0163214	THYM
SA_paths	FLI1	0.00675504	THYM
SA_paths	GMEB1	0.0323865	THYM
SA_paths	IKZF1	0.000129545	THYM
SA_paths	IRF8	0.00248654	THYM
SA_paths	KDM2B	0.0152955	THYM
SA_paths	RUNX3	0.0481992	THYM
SA_paths	TTF1	0.0323865	THYM
Type_1_2_LacNAc	ASCL2	0.0464532	THYM
Type_1_2_LacNAc	PPARGC1A	0.00619745	THYM
Type_1_2_LacNAc	TLE3	0.0464532	THYM
Type_1_2_LacNAc	TP63	0.00160077	THYM
O_fucose	BACH2	0.0234316	THYM
O_fucose	BCAT1	0.042059	THYM
O_fucose	FLI1	0.0414211	THYM
O_fucose	FOXO1	0.031686	THYM
O_fucose	IKZF1	0.00220622	THYM
O_fucose	IRF8	0.0160543	THYM
O_fucose	KLF15	0.0160543	THYM
O_fucose	PBX1	0.0425329	THYM
O_fucose	PCGF1	0.042059	THYM
O_fucose	RUNX2	0.042059	THYM
O_fucose	TCF7	0.0160543	THYM
O_fucose	TP63	0.0119152	THYM
O_mannose	FOXO1	0.0391364	THYM
O_mannose	PBX1	0.0480791	THYM
O_mannose	RORA	0.0373217	THYM
O_mannose	SNAI2	0.0140513	THYM
O_mannose	SOX15	0.0188324	THYM
O_mannose	TP63	0.0201321	THYM
HA_Synthesis	MECP2	0.0175051	THYM
HA_Synthesis	SVIL	0.00501724	THYM
HS_Extend	JARID2	0.0448993	THYM
HS_Extend	MYC	0.0439422	THYM
HS_Extend	TCF12	0.0169289	THYM
HS_Extend	TCF7L1	0.005644	THYM
CS_DS_Extend	BACH2	0.0343045	THYM
CS_DS_Extend	INO80	0.0343045	THYM
CS_DS_Extend	MEF2C	0.0343045	THYM
CS_HS_Init	CPSF3L	0.0207156	THYM
CS_HS_Init	PHF6	0.0207156	THYM
CS_HS_Init	SATB1	0.0207156	THYM
GalNAc_Olinked	BACH2	0.0290099	THYM
GalNAc_Olinked	CAMTA2	0.047081	THYM
N_linked_branching	BCOR	0.0439422	THYM
N_linked_branching	IRF2	0.0439422	THYM
N_linked_branching	KDM6B	0.0254629	THYM
N_linked_branching	MYBL1	0.0055508	THYM
N_linked_branching	NFYA	0.0346455	THYM
N_linked_branching	OGT	0.0174682	THYM
N_linked_branching	PIAS1	0.0354935	THYM
N_linked_branching	PRAME	0.0439422	THYM
N_linked_branching	RFX5	0.0346455	THYM
N_linked_branching	SETDB1	0.0055508	THYM
N_linked_branching	SMC1A	0.0301608	THYM
N_linked_branching	THAP1	0.0439422	THYM
Complex_Nlinked	ATF2	0.0237968	THYM
Complex_Nlinked	LDB1	0.0199163	THYM
Dolichol	BRD2	0.0370653	THYM
Dolichol	CASP8AP2	0.0260972	THYM
Dolichol	MBD3	0.0142381	THYM
Dolichol	RB1	0.0491868	THYM
Gangliosides	BCAT1	0.00627746	THYM
Gangliosides	ERG	0.0248976	THYM
Gangliosides	FLI1	0.049236	THYM
Gangliosides	GMEB1	0.0125194	THYM
Gangliosides	IKZF1	0.0432032	THYM
Gangliosides	KDM2B	0.00226486	THYM
Gangliosides	TTF1	0.0125194	THYM
P1PK_BloodGroup	MEIS1	0.0335478	THYM
P1PK_BloodGroup	SIX5	0.0279212	THYM
P1PK_BloodGroup	SNAI2	0.0279212	THYM
P1PK_BloodGroup	TERF1	0.034135	THYM
P1PK_BloodGroup	TFAP2A	0.0459832	THYM
P1PK_BloodGroup	TP63	0.00340317	THYM
GSL_Core	SMAD3	0.0348603	THYM
GPI_Anchor	BRCA1	0.00309215	UCEC
GPI_Anchor	MED1	0.0172813	UCEC
sulfated_glycans	ALKBH3	0.0272109	UCEC
sulfated_glycans	BATF	0.0272109	UCEC
sulfated_glycans	TFCP2	0.0272109	UCEC
Terminal_Fucose	BATF	0.00453515	UCEC
Terminal_Fucose	LYL1	0.00905999	UCEC
LacdiNAc	CREB3L4	0.0270256	UCEC
LacdiNAc	GRHL2	0.0180787	UCEC
LacdiNAc	MBD4	0.00907029	UCEC
SA_paths	CD59	0.00680272	UCEC
SA_paths	ESR1	0.0203155	UCEC
SA_paths	GLIS3	0.0203155	UCEC
Type_1_2_LacNAc	TFCP2	0.031746	UCEC
O_fucose	KLF15	0.0272109	UCEC
O_fucose	TFCP2	0.0272109	UCEC
O_mannose	NFYA	0.042885	UCEC
O_mannose	SMC1A	0.042885	UCEC
O_mannose	TFCP2	0.0498866	UCEC
HS_Extend	HEYL	0.0408163	UCEC
HS_Extend	KDM1B	0.0408163	UCEC
HS_Extend	TEAD2	0.0408163	UCEC
CS_DS_Extend	PSIP1	0.0385488	UCEC
CS_HS_Init	BMI1	0.000937951	UCEC
GalNAc_Olinked	CD59	0.0362812	UCEC
GalNAc_Olinked	ESR1	0.00363169	UCEC
GalNAc_Olinked	HIF1A	0.00208403	UCEC
GalNAc_Olinked	MBD4	0.0362812	UCEC
N_linked_branching	ATF1	0.0448877	UCEC
N_linked_branching	MYBL1	0.0226757	UCEC
N_linked_branching	PRDM4	0.0448877	UCEC
N_linked_branching	STAT3	0.0448877	UCEC
Dolichol	DEK	0.0207792	UCEC
Dolichol	HINFP	0.0207792	UCEC
Dolichol	SIRT6	0.0207792	UCEC
P1PK_BloodGroup	TERF1	0.0404453	UCEC
P1PK_BloodGroup	TFCP2	0.0204082	UCEC
GSL_Core	RCOR1	0.0372692	UCEC
GPI_Anchor	SIRT6	0.00960123	UVM
sulfated_glycans	MEF2D	0.0235849	UVM
sulfated_glycans	TEAD2	0.0235849	UVM
Terminal_Fucose	HINFP	0.0281015	UVM
LacdiNAc	WRNIP1	0.0420514	UVM
Blood_Groups	CREB3	0.0234734	UVM
Blood_Groups	EGLN2	0.0234734	UVM
SA_paths	MEIS3	0.00943396	UVM
Type_1_2_LacNAc	CREB3	0.00701659	UVM
Type_1_2_LacNAc	MEF2D	0.0283019	UVM
Type_1_2_LacNAc	TEAD2	0.0283019	UVM
O_fucose	CBX4	0.0259434	UVM
O_fucose	CHD8	0.0199739	UVM
O_fucose	GTF2F1	0.0259434	UVM
O_fucose	MEF2D	0.0259434	UVM
O_fucose	TEAD2	0.0259434	UVM
O_mannose	MEF2D	0.0283019	UVM
O_mannose	TEAD2	0.0283019	UVM
HS_Extend	FUS	0.0420514	UVM
HS_Extend	PIAS4	0.0420514	UVM
HS_Extend	TEAD1	0.0461906	UVM
CS_DS_Extend	MAZ	0.0235849	UVM
CS_DS_Extend	STAT6	0.0235849	UVM
CS_HS_Init	MAFG	0.0306604	UVM
GalNAc_Olinked	E2F3	0.0433049	UVM
GalNAc_Olinked	WRNIP1	0.00334538	UVM
N_linked_branching	BCOR	0.0400943	UVM
N_linked_branching	CREBBP	0.0400943	UVM
N_linked_branching	EED	0.0399894	UVM
Complex_Nlinked	MAF	0.0400992	UVM
Complex_Nlinked	XRN2	0.0313863	UVM
Dolichol	MXD3	0.00844075	UVM
Gangliosides	MEIS3	0.00471698	UVM
Gangliosides	NFYC	0.0327847	UVM
P1PK_BloodGroup	MEF2D	0.0188679	UVM
P1PK_BloodGroup	TEAD2	0.0188679	UVM
GSL_Core	PHF20	0.0235849	UVM
GSL_Core	SNAPC5	0.0235849	UVM
GSL_Core	TEAD2	0.0235849	UVM
