# Supplementary material for: A systems-based framework to computationally describe putative transcription factors and signaling pathways regulating glycan biosynthesis
Source: publisher site journal article supplement (doi:10.3762/bjoc.17.119), 2021-07-22
Supplement: Additional file 3 [file Table_S5.xlsx]

## Sheet: all_cancer_signaling_enrich
Reactome-enriched pathways for each of the TFs (pathways were selected based on FDR ≤ 0.1)
resource	entitiesCount	entitiesFound	entitiesRatio	entitiesPValue	entitiesFDR	interactorsCount	interactorsFound	interactorsRatio	entitiesAndInteractorsCount	entitiesAndInteractorsFound	reactionsCount	reactionsFound	reactionsRatio	path	entities	glycoPath	ctype
TOTAL	104	2	0.00706474	0.0021629	0.0410951	502	0	0.026596	582	2	59	12	0.0044599	Circadian Clock	RORA;RORA	sulfated_glycans	ACC
TOTAL	216	2	0.0146729	0.00895862	0.0806276	153	0	0.016314	357	2	47	1	0.0035528	Interleukin-4 and Interleukin-13 signaling	RORA;RORA	sulfated_glycans	ACC
TOTAL	486	8	0.0330141	0.000429426	0.0188947	1758	0	0.0966961	2116	8	259	10	0.0195782	Transcriptional Regulation by TP53	E2F7;BRCA1;FANCD2;BRCA1;FANCD2;E2F7	GPI_Anchor	BRCA_1
TOTAL	46	3	0.00312479	0.000708873	0.0205573	386	0	0.0185989	407	3	33	7	0.00249452	Transcriptional Regulation by E2F6	BRCA1;MAX;BRCA1	GPI_Anchor	BRCA_1
TOTAL	20	2	0.0013586	0.00261286	0.0574829	117	0	0.00589499	129	2	17	6	0.00128506	TP53 Regulates Transcription of Genes Involved in G1 Cell Cycle Arrest	E2F7;E2F7	GPI_Anchor	BRCA_1
TOTAL	2	1	0.00013586	0.00744497	0.0893397	71	0	0.00324453	71	1	2	2	0.000151183	Diseases of DNA Double-Strand Break Repair	BRCA1	GPI_Anchor	BRCA_1
TOTAL	2	1	0.00013586	0.00744497	0.0893397	45	0	0.00205639	45	1	1	1	7.55915e-05	Defective DNA double strand break response due to BARD1 loss of function	BRCA1	GPI_Anchor	BRCA_1
TOTAL	2	1	0.00013586	0.00744497	0.0893397	27	0	0.00127953	28	1	1	1	7.55915e-05	Defective DNA double strand break response due to BRCA1 loss of function	BRCA1	GPI_Anchor	BRCA_1
TOTAL	216	4	0.0146729	2.08794e-05	0.000668141	153	0	0.016314	357	4	47	2	0.0035528	Interleukin-4 and Interleukin-13 signaling	IRF4;IRF4;FOXO1;FOXO1	sulfated_glycans	BRCA_1
TOTAL	647	4	0.0439508	0.0013893	0.0222288	2096	0	0.116072	2540	4	493	2	0.0372666	Signaling by Interleukins	IRF4;IRF4;FOXO1;FOXO1	sulfated_glycans	BRCA_1
TOTAL	108	2	0.00733646	0.00338285	0.0338285	446	0	0.024174	529	2	18	3	0.00136065	Transcriptional regulation of white adipocyte differentiation	EBF1;EBF1	sulfated_glycans	BRCA_1
TOTAL	6	1	0.000407581	0.00488002	0.0352915	11	0	0.000731161	16	1	2	2	0.000151183	AKT-mediated inactivation of FOXO1A	FOXO1	sulfated_glycans	BRCA_1
TOTAL	1108	4	0.0752666	0.0097137	0.0352915	2824	0	0.165288	3617	4	687	6	0.0519314	Cytokine Signaling in Immune system	IRF4;IRF4;FOXO1;FOXO1	sulfated_glycans	BRCA_1
TOTAL	12	1	0.000815162	0.00973821	0.0352915	38	0	0.00223918	49	1	4	1	0.000302366	AKT phosphorylates targets in the nucleus	FOXO1	sulfated_glycans	BRCA_1
TOTAL	191	2	0.0129747	0.0101905	0.0352915	207	0	0.017685	387	2	22	2	0.00166301	Interferon alpha/beta signaling	IRF4;IRF4	sulfated_glycans	BRCA_1
TOTAL	14	1	0.000951022	0.0113528	0.0352915	34	0	0.001965	43	1	5	3	0.000377958	Regulation of localization of FOXO transcription factors	FOXO1	sulfated_glycans	BRCA_1
TOTAL	16	1	0.00108688	0.0129649	0.0352915	183	0	0.00868254	190	1	9	3	0.000680324	Regulation of FOXO transcriptional activity by acetylation	FOXO1	sulfated_glycans	BRCA_1
TOTAL	1263	4	0.0857958	0.0152847	0.0352915	3128	0	0.184755	4043	4	556	8	0.0420289	Developmental Biology	EBF1;FOXO1;EBF1;FLI1	sulfated_glycans	BRCA_1
TOTAL	255	2	0.0173222	0.0176458	0.0352915	230	0	0.021615	473	2	16	2	0.00120946	Interferon gamma signaling	IRF4;IRF4	sulfated_glycans	BRCA_1
TOTAL	23	1	0.00156239	0.0185885	0.0371769	175	0	0.00891103	195	1	15	12	0.00113387	FOXO-mediated transcription of cell death genes	FOXO1	sulfated_glycans	BRCA_1
TOTAL	27	1	0.00183411	0.0217887	0.0408516	190	0	0.00982498	215	1	22	18	0.00166301	FOXO-mediated transcription of cell cycle genes	FOXO1	sulfated_glycans	BRCA_1
TOTAL	32	1	0.00217377	0.0257756	0.0408516	291	0	0.0143033	313	1	18	1	0.00136065	Constitutive Signaling by AKT1 E17K in Cancer	FOXO1	sulfated_glycans	BRCA_1
TOTAL	35	1	0.00237756	0.0281605	0.0408516	138	0	0.00776859	170	1	12	3	0.000907098	Regulation of gene expression in beta cells	FOXO1	sulfated_glycans	BRCA_1
TOTAL	49	1	0.00332858	0.0392197	0.0408516	205	0	0.0113787	249	1	34	29	0.00257011	FOXO-mediated transcription of oxidative stress, metabolic and neuronal genes	FOXO1	sulfated_glycans	BRCA_1
TOTAL	401	2	0.02724	0.0408516	0.0408516	673	0	0.0472056	1033	2	69	4	0.00521581	Interferon Signaling	IRF4;IRF4	sulfated_glycans	BRCA_1
TOTAL	67	1	0.00455132	0.0532692	0.0532692	161	0	0.0102363	224	1	26	3	0.00196538	Regulation of beta-cell development	FOXO1	sulfated_glycans	BRCA_1
TOTAL	71	1	0.00482304	0.0563656	0.0563656	368	0	0.0195129	427	1	27	2	0.00204097	Transcriptional regulation of granulopoiesis	FLI1	sulfated_glycans	BRCA_1
TOTAL	106	1	0.0072006	0.083066	0.083066	592	0	0.0308916	676	1	40	3	0.00302366	MAPK6/MAPK4 signaling	FOXO1	sulfated_glycans	BRCA_1
TOTAL	110	1	0.00747232	0.0860729	0.0860729	633	0	0.0329936	722	1	85	65	0.00642528	FOXO-mediated transcription	FOXO1	sulfated_glycans	BRCA_1
TOTAL	191	4	0.0129747	7.49633e-05	0.00232386	207	0	0.017685	387	4	22	2	0.00166301	Interferon alpha/beta signaling	IRF5;IRF4;IRF5;IRF4	Terminal_Fucose	BRCA_1
TOTAL	255	4	0.0173222	0.000226786	0.00340179	230	0	0.021615	473	4	16	2	0.00120946	Interferon gamma signaling	IRF5;IRF4;IRF5;IRF4	Terminal_Fucose	BRCA_1
TOTAL	401	4	0.02724	0.00123999	0.0123999	673	0	0.0472056	1033	4	69	4	0.00521581	Interferon Signaling	IRF5;IRF4;IRF5;IRF4	Terminal_Fucose	BRCA_1
TOTAL	4	1	0.000271721	0.00487969	0.0341578	0	0	0.00018279	4	1	2	2	0.000151183	RUNX3 regulates RUNX1-mediated transcription	RUNX3	Terminal_Fucose	BRCA_1
TOTAL	6	1	0.000407581	0.0073111	0.0364713	47	0	0.00228488	50	1	2	2	0.000151183	RUNX3 regulates BCL2L11 (BIM) transcription	RUNX3	Terminal_Fucose	BRCA_1
TOTAL	8	1	0.000543441	0.00973689	0.0364713	70	0	0.00351871	77	1	6	6	0.000453549	RUNX3 regulates CDKN1A transcription	RUNX3	Terminal_Fucose	BRCA_1
TOTAL	9	1	0.000611372	0.0109477	0.0364713	11	0	0.000913951	20	1	3	2	0.000226775	RUNX3 regulates YAP1-mediated transcription	RUNX3	Terminal_Fucose	BRCA_1
TOTAL	10	1	0.000679302	0.0121571	0.0364713	9	0	0.000868254	19	1	5	5	0.000377958	RUNX3 Regulates Immune Response and Cell Migration	RUNX3	Terminal_Fucose	BRCA_1
TOTAL	10	1	0.000679302	0.0121571	0.0364713	160	0	0.0075858	166	1	5	3	0.000377958	RUNX3 regulates WNT signaling	RUNX3	Terminal_Fucose	BRCA_1
TOTAL	10	1	0.000679302	0.0121571	0.0364713	176	0	0.00845405	185	1	4	1	0.000302366	Binding of TCF/LEF:CTNNB1 to target gene promoters	RUNX3	Terminal_Fucose	BRCA_1
TOTAL	16	1	0.00108688	0.0193842	0.0387684	99	0	0.00516383	113	1	8	8	0.000604732	RUNX3 regulates p14-ARF	RUNX3	Terminal_Fucose	BRCA_1
TOTAL	16	1	0.00108688	0.0193842	0.0387684	11	0	0.00114244	25	1	7	5	0.000529141	RUNX3 regulates NOTCH signaling	RUNX3	Terminal_Fucose	BRCA_1
TOTAL	216	2	0.0146729	0.0281877	0.0547768	153	0	0.016314	357	2	47	1	0.0035528	Interleukin-4 and Interleukin-13 signaling	IRF4;IRF4	Terminal_Fucose	BRCA_1
TOTAL	1108	4	0.0752666	0.041847	0.0547768	2824	0	0.165288	3617	4	687	5	0.0519314	Cytokine Signaling in Immune system	IRF5;IRF4;IRF5;IRF4	Terminal_Fucose	BRCA_1
TOTAL	43	1	0.002921	0.0512926	0.0547768	137	0	0.00799708	175	1	28	1	0.00211656	G1/S-Specific Transcription	E2F6	Terminal_Fucose	BRCA_1
TOTAL	46	1	0.00312479	0.0547768	0.0547768	386	0	0.0185989	407	1	33	31	0.00249452	Transcriptional Regulation by E2F6	E2F6	Terminal_Fucose	BRCA_1
TOTAL	57	1	0.00387202	0.0674492	0.0674492	148	0	0.00923091	202	1	9	9	0.000680324	Regulation of RUNX3 expression and activity	RUNX3	Terminal_Fucose	BRCA_1
TOTAL	67	1	0.00455132	0.0788301	0.0788301	753	0	0.036421	797	1	13	1	0.00098269	Formation of the beta-catenin:TCF transactivating complex	RUNX3	Terminal_Fucose	BRCA_1
TOTAL	4	2	0.000271721	2.77774e-05	0.00266663	208	0	0.00964219	211	2	5	4	0.000377958	Regulation of TP53 Expression	PRDM1;PRDM1	Type_1_2_LacNAc	BRCA_1
TOTAL	56	3	0.00380409	0.000167937	0.00806098	327	0	0.0170452	373	3	37	12	0.00279689	NGF-stimulated transcription	FOS;EGR2;EGR2	Type_1_2_LacNAc	BRCA_1
TOTAL	80	3	0.00543441	0.000474904	0.0151969	350	0	0.0191016	418	3	48	12	0.00362839	Nuclear Events (kinase and transcription factor activation)	FOS;EGR2;EGR2	Type_1_2_LacNAc	BRCA_1
TOTAL	29	2	0.00196997	0.00141777	0.0340264	208	0	0.0105104	230	2	12	2	0.000907098	Estrogen-dependent nuclear events downstream of ESR-membrane signaling	FOS;FOS	Type_1_2_LacNAc	BRCA_1
TOTAL	143	3	0.00971401	0.00250393	0.0405472	696	0	0.0369236	808	3	102	12	0.00771033	Signaling by NTRK1 (TRKA)	FOS;EGR2;EGR2	Type_1_2_LacNAc	BRCA_1
TOTAL	39	2	0.00264928	0.0025342	0.0405472	179	0	0.00982498	215	2	26	19	0.00196538	EGR2 and SOX10-mediated initiation of Schwann cell myelination	EGR2;EGR2	Type_1_2_LacNAc	BRCA_1
TOTAL	46	2	0.00312479	0.00349674	0.0454576	501	0	0.0244939	536	2	35	4	0.0026457	Regulation of TP53 Expression and Degradation	PRDM1;PRDM1	Type_1_2_LacNAc	BRCA_1
TOTAL	166	3	0.0112764	0.00380437	0.0456524	925	0	0.0479825	1050	3	164	12	0.012397	Signaling by NTRKs	FOS;EGR2;EGR2	Type_1_2_LacNAc	BRCA_1
TOTAL	9	1	0.000611372	0.0169779	0.0903005	271	0	0.0127953	280	1	21	4	0.00158742	CREB3 factors activate genes	CREB3L4	Type_1_2_LacNAc	BRCA_1
TOTAL	110	2	0.00747232	0.0185549	0.0903005	367	0	0.0210209	460	2	38	2	0.00287248	Extra-nuclear estrogen signaling	FOS;FOS	Type_1_2_LacNAc	BRCA_1
TOTAL	12	1	0.000815162	0.0225751	0.0903005	156	0	0.00740301	162	1	5	2	0.000377958	Activation of the AP-1 family of transcription factors	FOS	Type_1_2_LacNAc	BRCA_1
TOTAL	2	2	0.00013586	5.08428e-06	0.000137275	0	0	9.13951e-05	2	2	1	1	7.55915e-05	Loss of MECP2 binding ability to 5hmC-DNA	MECP2	HS_Extend	BRCA_1
TOTAL	100	4	0.00679302	2.02952e-05	0.000365313	1159	0	0.0570306	1248	4	77	73	0.00582055	Transcriptional Regulation by MECP2	MECP2;MECP2	HS_Extend	BRCA_1
TOTAL	5	2	0.000339651	3.16819e-05	0.000411865	0	0	0.000228488	5	2	2	2	0.000151183	Loss of MECP2 binding ability to 5mC-DNA	MECP2	HS_Extend	BRCA_1
TOTAL	6	2	0.000407581	4.55765e-05	0.000455765	45	0	0.00233058	51	2	4	4	0.000302366	MECP2 regulates transcription of genes involved in GABA signaling	MECP2	HS_Extend	BRCA_1
TOTAL	7	2	0.000475511	6.1973e-05	0.000557757	0	0	0.000319883	7	2	1	1	7.55915e-05	Loss of phosphorylation of MECP2 at T308	MECP2	HS_Extend	BRCA_1
TOTAL	8	2	0.000543441	8.08638e-05	0.000566046	0	0	0.000365581	8	2	1	1	7.55915e-05	Loss of MECP2 binding ability to the NCoR/SMRT complex	MECP2	HS_Extend	BRCA_1
TOTAL	10	2	0.000679302	0.000126098	0.00075659	47	0	0.00251337	55	2	8	8	0.000604732	MECP2 regulates transcription factors	MECP2	HS_Extend	BRCA_1
TOTAL	13	2	0.000883092	0.000212471	0.00127482	12	0	0.00114244	25	2	8	8	0.000604732	MECP2 regulates transcription of neuronal ligands	MECP2	HS_Extend	BRCA_1
TOTAL	16	2	0.00108688	0.000320889	0.00128356	0	0	0.000731161	16	2	5	5	0.000377958	Disorders of Nervous System Development	MECP2	HS_Extend	BRCA_1
TOTAL	16	2	0.00108688	0.000320889	0.00128356	0	0	0.000731161	16	2	5	5	0.000377958	Loss of function of MECP2 in Rett syndrome	MECP2	HS_Extend	BRCA_1
TOTAL	16	2	0.00108688	0.000320889	0.00128356	0	0	0.000731161	16	2	5	5	0.000377958	Disorders of Developmental Biology	MECP2	HS_Extend	BRCA_1
TOTAL	16	2	0.00108688	0.000320889	0.00128356	0	0	0.000731161	16	2	5	5	0.000377958	Pervasive developmental disorders	MECP2	HS_Extend	BRCA_1
TOTAL	32	2	0.00217377	0.00126329	0.00378988	113	0	0.00653475	143	2	26	26	0.00196538	MECP2 regulates neuronal receptors and channels	MECP2	HS_Extend	BRCA_1
TOTAL	3	1	0.000203791	0.00487953	0.0146386	35	0	0.00159942	35	1	1	1	7.55915e-05	SMAD2/3 MH2 Domain Mutants in Cancer	SMAD4	HS_Extend	BRCA_1
TOTAL	3	1	0.000203791	0.00487953	0.0146386	0	0	0.000137093	3	1	1	1	7.55915e-05	Loss of Function of SMAD4 in Cancer	SMAD4	HS_Extend	BRCA_1
TOTAL	3	1	0.000203791	0.00487953	0.0146386	0	0	0.000137093	3	1	1	1	7.55915e-05	SMAD4 MH2 Domain Mutants in Cancer	SMAD4	HS_Extend	BRCA_1
TOTAL	6	1	0.000407581	0.00973623	0.0259228	47	0	0.00228488	50	1	2	2	0.000151183	RUNX3 regulates BCL2L11 (BIM) transcription	SMAD4	HS_Extend	BRCA_1
TOTAL	8	1	0.000543441	0.0129614	0.0259228	70	0	0.00351871	77	1	6	3	0.000453549	RUNX3 regulates CDKN1A transcription	SMAD4	HS_Extend	BRCA_1
TOTAL	8	1	0.000543441	0.0129614	0.0259228	35	0	0.0018279	40	1	2	1	0.000151183	Loss of Function of SMAD2/3 in Cancer	SMAD4	HS_Extend	BRCA_1
TOTAL	9	1	0.000611372	0.0145702	0.0291404	35	0	0.0018736	41	1	7	2	0.000529141	Signaling by TGF-beta Receptor Complex in Cancer	SMAD4	HS_Extend	BRCA_1
TOTAL	15	1	0.00101895	0.0241704	0.0483409	103	0	0.00525522	115	1	10	3	0.000755915	Signaling by Activin	SMAD4	HS_Extend	BRCA_1
TOTAL	23	1	0.00156239	0.0368314	0.0570703	114	0	0.00607778	133	1	12	4	0.000907098	Signaling by NODAL	SMAD4	HS_Extend	BRCA_1
TOTAL	27	1	0.00183411	0.0431027	0.0570703	239	0	0.0116529	255	1	21	19	0.00158742	Downregulation of SMAD2/3:SMAD4 transcriptional activity	SMAD4	HS_Extend	BRCA_1
TOTAL	27	1	0.00183411	0.0431027	0.0570703	190	0	0.00982498	215	1	22	6	0.00166301	FOXO-mediated transcription of cell cycle genes	SMAD4	HS_Extend	BRCA_1
TOTAL	30	1	0.00203791	0.0477804	0.0570703	49	0	0.00338162	74	1	17	4	0.00128506	Signaling by BMP	SMAD4	HS_Extend	BRCA_1
TOTAL	36	1	0.00244549	0.0570703	0.0570703	346	0	0.0169538	371	1	39	1	0.00294807	TGF-beta receptor signaling activates SMADs	SMAD4	HS_Extend	BRCA_1
TOTAL	39	1	0.00264928	0.0616826	0.0616826	400	0	0.0196043	429	1	17	13	0.00128506	SMAD2/SMAD3:SMAD4 heterotrimer regulates transcription	SMAD4	HS_Extend	BRCA_1
TOTAL	43	1	0.002921	0.0677987	0.0677987	278	0	0.014349	314	1	32	3	0.00241893	RUNX2 regulates bone development	SMAD4	HS_Extend	BRCA_1
TOTAL	45	1	0.00305686	0.0708424	0.0708424	231	0	0.0124297	272	1	35	4	0.0026457	Transcriptional regulation of pluripotent stem cells	SMAD4	HS_Extend	BRCA_1
TOTAL	49	1	0.00332858	0.0769013	0.0769013	205	0	0.0113787	249	1	34	2	0.00257011	FOXO-mediated transcription of oxidative stress, metabolic and neuronal genes	SMAD4	HS_Extend	BRCA_1
TOTAL	55	1	0.00373616	0.0859187	0.0859187	574	0	0.0277841	608	1	38	32	0.00287248	Transcriptional activity of SMAD2/SMAD3:SMAD4 heterotrimer	SMAD4	HS_Extend	BRCA_1
TOTAL	118	5	0.00801576	1.51816e-05	0.00212542	415	0	0.0231687	507	5	47	7	0.0035528	Transcriptional regulation by RUNX3	RUNX1;YAP1;RUNX1;TEAD1	CS_DS_Extend	BRCA_1
TOTAL	4	2	0.000271721	5.43443e-05	0.0038041	0	0	0.00018279	4	2	2	2	0.000151183	RUNX3 regulates RUNX1-mediated transcription	RUNX1	CS_DS_Extend	BRCA_1
TOTAL	9	2	0.000611372	0.000272825	0.011769	11	0	0.000913951	20	2	3	3	0.000226775	RUNX3 regulates YAP1-mediated transcription	YAP1;TEAD1	CS_DS_Extend	BRCA_1
TOTAL	10	2	0.000679302	0.000336258	0.011769	47	0	0.00251337	55	2	8	2	0.000604732	MECP2 regulates transcription factors	MEF2C;MEF2C	CS_DS_Extend	BRCA_1
TOTAL	18	2	0.00122274	0.001075	0.0301	141	0	0.00694603	152	2	9	6	0.000680324	YAP1- and WWTR1 (TAZ)-stimulated gene expression	YAP1;TEAD1	CS_DS_Extend	BRCA_1
TOTAL	32	2	0.00217377	0.00331907	0.0763386	148	0	0.00799708	175	2	19	18	0.00143624	Regulation of RUNX1 Expression and Activity	RUNX1;RUNX1	CS_DS_Extend	BRCA_1
TOTAL	39	2	0.00264928	0.00487282	0.0974565	179	0	0.00982498	215	2	26	2	0.00196538	EGR2 and SOX10-mediated initiation of Schwann cell myelination	YAP1;TEAD1	CS_DS_Extend	BRCA_1
TOTAL	23	2	0.00156239	0.000133006	0.00159608	10	0	0.00150802	33	2	2	2	0.000151183	RNA Polymerase III Transcription Termination	NFIC;POLR3A	N_linked_branching	BRCA_1
TOTAL	46	2	0.00312479	0.000527061	0.00210825	10	0	0.00255906	56	2	13	13	0.00098269	RNA Polymerase III Abortive And Retractive Initiation	NFIC;POLR3A	N_linked_branching	BRCA_1
TOTAL	46	2	0.00312479	0.000527061	0.00210825	33	0	0.00361011	79	2	25	18	0.00188979	RNA Polymerase III Transcription	NFIC;POLR3A	N_linked_branching	BRCA_1
TOTAL	22	1	0.00149446	0.0163168	0.0207246	0	0	0.00100535	22	1	3	3	0.000226775	RNA Polymerase III Chain Elongation	POLR3A	N_linked_branching	BRCA_1
TOTAL	27	1	0.00183411	0.0199913	0.0207246	0	0	0.00123383	27	1	4	2	0.000302366	RNA Polymerase III Transcription Initiation From Type 2 Promoter	POLR3A	N_linked_branching	BRCA_1
TOTAL	28	1	0.00190204	0.0207246	0.0207246	23	0	0.00233058	51	1	4	2	0.000302366	RNA Polymerase III Transcription Initiation From Type 3 Promoter	POLR3A	N_linked_branching	BRCA_1
TOTAL	28	1	0.00190204	0.0207246	0.0207246	0	0	0.00127953	28	1	5	2	0.000377958	RNA Polymerase III Transcription Initiation From Type 1 Promoter	POLR3A	N_linked_branching	BRCA_1
TOTAL	36	1	0.00244549	0.0265738	0.0265738	23	0	0.00269616	59	1	13	6	0.00098269	RNA Polymerase III Transcription Initiation	POLR3A	N_linked_branching	BRCA_1
TOTAL	78	1	0.00529855	0.0567643	0.0567643	369	0	0.0196043	429	1	49	1	0.00370398	Cytosolic sensors of pathogen-associated DNA	POLR3A	N_linked_branching	BRCA_1
TOTAL	29	2	0.00196997	0.000648975	0.0564608	208	0	0.0105104	230	2	12	2	0.000907098	Estrogen-dependent nuclear events downstream of ESR-membrane signaling	FOS;FOS	P1PK_BloodGroup	BRCA_1
TOTAL	110	2	0.00747232	0.00877449	0.0922498	367	0	0.0210209	460	2	38	2	0.00287248	Extra-nuclear estrogen signaling	FOS;FOS	P1PK_BloodGroup	BRCA_1
TOTAL	9	1	0.000611372	0.0115524	0.0922498	271	0	0.0127953	280	1	21	4	0.00158742	CREB3 factors activate genes	CREB3L4	P1PK_BloodGroup	BRCA_1
TOTAL	12	1	0.000815162	0.015375	0.0922498	156	0	0.00740301	162	1	5	2	0.000377958	Activation of the AP-1 family of transcription factors	FOS	P1PK_BloodGroup	BRCA_1
TOTAL	9	1	0.000611372	0.00670457	0.0670457	271	0	0.0127953	280	1	21	4	0.00158742	CREB3 factors activate genes	CREB3L4	GSL_Core	BRCA_1
TOTAL	2	1	0.00013586	0.0042031	0.0210155	85	0	0.00388429	85	1	2	2	0.000151183	Defective Inhibition of DNA Recombination at Telomere	ATRX	GPI_Anchor	BRCA_2
TOTAL	2	1	0.00013586	0.0042031	0.0210155	85	0	0.00388429	85	1	2	2	0.000151183	Diseases of Telomere Maintenance	ATRX	GPI_Anchor	BRCA_2
TOTAL	2	1	0.00013586	0.0042031	0.0210155	81	0	0.0037472	82	1	1	1	7.55915e-05	Defective Inhibition of DNA Recombination at Telomere Due to ATRX Mutations	ATRX	GPI_Anchor	BRCA_2
TOTAL	2	1	0.00013586	0.0042031	0.0210155	4	0	0.000228488	5	1	1	1	7.55915e-05	Defective Inhibition of DNA Recombination at Telomere Due to DAXX Mutations	ATRX	GPI_Anchor	BRCA_2
TOTAL	2	1	0.00013586	0.0042031	0.0210155	85	0	0.00388429	85	1	2	2	0.000151183	Alternative Lengthening of Telomeres (ALT)	ATRX	GPI_Anchor	BRCA_2
TOTAL	87	2	0.00590992	0.0144959	0.0563392	257	0	0.0151716	332	2	32	16	0.00241893	Transcriptional activation of mitochondrial biogenesis	GABPA;GABPA	GPI_Anchor	BRCA_2
TOTAL	9	1	0.000611372	0.0187797	0.0563392	271	0	0.0127953	280	1	21	5	0.00158742	CREB3 factors activate genes	CREB3	GPI_Anchor	BRCA_2
TOTAL	127	2	0.00862713	0.0293282	0.0879846	391	0	0.0228488	500	2	36	16	0.00272129	Mitochondrial biogenesis	GABPA;GABPA	GPI_Anchor	BRCA_2
TOTAL	4	1	0.000271721	0.00271389	0.0203169	0	0	0.00018279	4	1	2	2	0.000151183	RUNX3 regulates RUNX1-mediated transcription	RUNX3	Terminal_Fucose	BRCA_2
TOTAL	6	1	0.000407581	0.00406834	0.0203169	47	0	0.00228488	50	1	2	2	0.000151183	RUNX3 regulates BCL2L11 (BIM) transcription	RUNX3	Terminal_Fucose	BRCA_2
TOTAL	8	1	0.000543441	0.00542114	0.0203169	70	0	0.00351871	77	1	6	6	0.000453549	RUNX3 regulates CDKN1A transcription	RUNX3	Terminal_Fucose	BRCA_2
TOTAL	9	1	0.000611372	0.00609692	0.0203169	11	0	0.000913951	20	1	3	2	0.000226775	RUNX3 regulates YAP1-mediated transcription	RUNX3	Terminal_Fucose	BRCA_2
TOTAL	10	1	0.000679302	0.00677229	0.0203169	9	0	0.000868254	19	1	5	5	0.000377958	RUNX3 Regulates Immune Response and Cell Migration	RUNX3	Terminal_Fucose	BRCA_2
TOTAL	10	1	0.000679302	0.00677229	0.0203169	160	0	0.0075858	166	1	5	3	0.000377958	RUNX3 regulates WNT signaling	RUNX3	Terminal_Fucose	BRCA_2
TOTAL	10	1	0.000679302	0.00677229	0.0203169	176	0	0.00845405	185	1	4	1	0.000302366	Binding of TCF/LEF:CTNNB1 to target gene promoters	RUNX3	Terminal_Fucose	BRCA_2
TOTAL	16	1	0.00108688	0.0108158	0.0216316	99	0	0.00516383	113	1	8	8	0.000604732	RUNX3 regulates p14-ARF	RUNX3	Terminal_Fucose	BRCA_2
TOTAL	16	1	0.00108688	0.0108158	0.0216316	11	0	0.00114244	25	1	7	5	0.000529141	RUNX3 regulates NOTCH signaling	RUNX3	Terminal_Fucose	BRCA_2
TOTAL	255	2	0.0173222	0.0123104	0.0246207	230	0	0.021615	473	2	16	2	0.00120946	Interferon gamma signaling	CIITA;CIITA	Terminal_Fucose	BRCA_2
TOTAL	31	1	0.00210584	0.0208599	0.0380525	15	0	0.00210209	46	1	15	1	0.00113387	PIWI-interacting RNA (piRNA) biogenesis	MYBL1	Terminal_Fucose	BRCA_2
TOTAL	401	2	0.02724	0.0288719	0.0380525	673	0	0.0472056	1033	2	69	2	0.00521581	Interferon Signaling	CIITA;CIITA	Terminal_Fucose	BRCA_2
TOTAL	57	1	0.00387202	0.0380525	0.0380525	148	0	0.00923091	202	1	9	9	0.000680324	Regulation of RUNX3 expression and activity	RUNX3	Terminal_Fucose	BRCA_2
TOTAL	67	1	0.00455132	0.0445923	0.0445923	753	0	0.036421	797	1	13	1	0.00098269	Formation of the beta-catenin:TCF transactivating complex	RUNX3	Terminal_Fucose	BRCA_2
TOTAL	117	1	0.00794783	0.0766952	0.0766952	37	0	0.00685464	150	1	36	1	0.00272129	Gene Silencing by RNA	MYBL1	Terminal_Fucose	BRCA_2
TOTAL	118	1	0.00801576	0.0773272	0.0773272	415	0	0.0231687	507	1	47	42	0.0035528	Transcriptional regulation by RUNX3	RUNX3	Terminal_Fucose	BRCA_2
TOTAL	36	1	0.00244549	0.0289543	0.0883222	83	0	0.00525522	115	1	22	2	0.00166301	NOTCH3 Intracellular Domain Regulates Transcription	IKZF1	O_fucose	BRCA_2
TOTAL	43	1	0.002921	0.0344943	0.0883222	52	0	0.00415848	91	1	7	7	0.000529141	HSF1 activation	HSF1	O_fucose	BRCA_2
TOTAL	47	1	0.00319272	0.037647	0.0883222	1	0	0.00219348	48	1	5	5	0.000377958	Attenuation phase	HSF1	O_fucose	BRCA_2
TOTAL	47	1	0.00319272	0.037647	0.0883222	88	0	0.00598638	131	1	15	2	0.00113387	Aggrephagy	HSF1	O_fucose	BRCA_2
TOTAL	59	1	0.00400788	0.0470484	0.0883222	1	0	0.00274185	60	1	8	8	0.000604732	HSF1-dependent transactivation	HSF1	O_fucose	BRCA_2
TOTAL	63	1	0.0042796	0.0501635	0.0883222	223	0	0.012841	281	1	37	2	0.00279689	Signaling by NOTCH3	IKZF1	O_fucose	BRCA_2
TOTAL	71	1	0.00482304	0.0563656	0.0883222	368	0	0.0195129	427	1	27	2	0.00204097	Transcriptional regulation of granulopoiesis	FLI1	O_fucose	BRCA_2
TOTAL	89	1	0.00604578	0.070185	0.0883222	503	0	0.0259562	568	1	48	2	0.00362839	Selective autophagy	HSF1	O_fucose	BRCA_2
TOTAL	113	1	0.00767611	0.0883222	0.0883222	152	0	0.0117443	257	1	14	7	0.00105828	Regulation of HSF1-mediated heat shock response	HSF1	O_fucose	BRCA_2
TOTAL	3	1	0.000203791	0.00325567	0.0389489	0	0	0.000137093	3	1	1	1	7.55915e-05	Loss of Function of SMAD4 in Cancer	SMAD2	GalNAc_Olinked	BRCA_2
TOTAL	3	1	0.000203791	0.00325567	0.0389489	35	0	0.00159942	35	1	1	1	7.55915e-05	SMAD2/3 MH2 Domain Mutants in Cancer	SMAD2	GalNAc_Olinked	BRCA_2
TOTAL	3	1	0.000203791	0.00325567	0.0389489	0	0	0.000137093	3	1	1	1	7.55915e-05	SMAD4 MH2 Domain Mutants in Cancer	SMAD2	GalNAc_Olinked	BRCA_2
TOTAL	6	1	0.000407581	0.0065014	0.0389489	0	0	0.000274185	6	1	1	1	7.55915e-05	TGFBR1 KD Mutants in Cancer	SMAD2	GalNAc_Olinked	BRCA_2
TOTAL	7	1	0.000475511	0.00758111	0.0389489	0	0	0.000319883	7	1	1	1	7.55915e-05	SMAD2/3 Phosphorylation Motif Mutants in Cancer	SMAD2	GalNAc_Olinked	BRCA_2
TOTAL	7	1	0.000475511	0.00758111	0.0389489	0	0	0.000319883	7	1	2	1	0.000151183	Loss of Function of TGFBR1 in Cancer	SMAD2	GalNAc_Olinked	BRCA_2
TOTAL	8	1	0.000543441	0.00865971	0.0389489	35	0	0.0018279	40	1	2	2	0.000151183	Loss of Function of SMAD2/3 in Cancer	SMAD2	GalNAc_Olinked	BRCA_2
TOTAL	9	1	0.000611372	0.00973722	0.0389489	35	0	0.0018736	41	1	7	4	0.000529141	Signaling by TGF-beta Receptor Complex in Cancer	SMAD2	GalNAc_Olinked	BRCA_2
TOTAL	15	1	0.00101895	0.0161792	0.0578912	103	0	0.00525522	115	1	10	4	0.000755915	Signaling by Activin	SMAD2	GalNAc_Olinked	BRCA_2
TOTAL	23	1	0.00156239	0.0247075	0.0578912	114	0	0.00607778	133	1	12	5	0.000907098	Signaling by NODAL	SMAD2	GalNAc_Olinked	BRCA_2
TOTAL	27	1	0.00183411	0.0289456	0.0578912	239	0	0.0116529	255	1	21	17	0.00158742	Downregulation of SMAD2/3:SMAD4 transcriptional activity	SMAD2	GalNAc_Olinked	BRCA_2
TOTAL	27	1	0.00183411	0.0289456	0.0578912	190	0	0.00982498	215	1	22	6	0.00166301	FOXO-mediated transcription of cell cycle genes	SMAD2	GalNAc_Olinked	BRCA_2
TOTAL	28	1	0.00190204	0.0300024	0.0581323	186	0	0.0095051	208	1	28	7	0.00211656	Downregulation of TGF-beta receptor signaling	SMAD2	GalNAc_Olinked	BRCA_2
TOTAL	36	1	0.00244549	0.0384183	0.0581323	346	0	0.0169538	371	1	39	11	0.00294807	TGF-beta receptor signaling activates SMADs	SMAD2	GalNAc_Olinked	BRCA_2
TOTAL	39	1	0.00264928	0.0415565	0.0581323	400	0	0.0196043	429	1	17	13	0.00128506	SMAD2/SMAD3:SMAD4 heterotrimer regulates transcription	SMAD2	GalNAc_Olinked	BRCA_2
TOTAL	45	1	0.00305686	0.0478042	0.0581323	231	0	0.0124297	272	1	35	4	0.0026457	Transcriptional regulation of pluripotent stem cells	SMAD2	GalNAc_Olinked	BRCA_2
TOTAL	49	1	0.00332858	0.0519482	0.0581323	205	0	0.0113787	249	1	34	2	0.00257011	FOXO-mediated transcription of oxidative stress, metabolic and neuronal genes	SMAD2	GalNAc_Olinked	BRCA_2
TOTAL	55	1	0.00373616	0.0581323	0.0581323	574	0	0.0277841	608	1	38	30	0.00287248	Transcriptional activity of SMAD2/SMAD3:SMAD4 heterotrimer	SMAD2	GalNAc_Olinked	BRCA_2
TOTAL	85	1	0.00577406	0.0884901	0.0884901	834	0	0.0405794	888	1	82	40	0.0061985	Signaling by TGF-beta Receptor Complex	SMAD2	GalNAc_Olinked	BRCA_2
TOTAL	191	2	0.0129747	0.00570389	0.0796972	207	0	0.017685	387	2	22	2	0.00166301	Interferon alpha/beta signaling	IRF4;IRF4	Gangliosides	BRCA_2
TOTAL	216	2	0.0146729	0.00723707	0.0796972	153	0	0.016314	357	2	47	1	0.0035528	Interleukin-4 and Interleukin-13 signaling	IRF4;IRF4	Gangliosides	BRCA_2
TOTAL	255	2	0.0173222	0.00996215	0.0796972	230	0	0.021615	473	2	16	2	0.00120946	Interferon gamma signaling	IRF4;IRF4	Gangliosides	BRCA_2
TOTAL	191	2	0.0129747	0.000992663	0.00527712	207	0	0.017685	387	2	22	2	0.00166301	Interferon alpha/beta signaling	IRF4;IRF4	GSL_Core	BRCA_2
TOTAL	216	2	0.0146729	0.00126663	0.00527712	153	0	0.016314	357	2	47	1	0.0035528	Interleukin-4 and Interleukin-13 signaling	IRF4;IRF4	GSL_Core	BRCA_2
TOTAL	255	2	0.0173222	0.00175904	0.00527712	230	0	0.021615	473	2	16	2	0.00120946	Interferon gamma signaling	IRF4;IRF4	GSL_Core	BRCA_2
TOTAL	401	2	0.02724	0.00429206	0.00858411	673	0	0.0472056	1033	2	69	4	0.00521581	Interferon Signaling	IRF4;IRF4	GSL_Core	BRCA_2
TOTAL	36	1	0.00244549	0.00974612	0.0109221	83	0	0.00525522	115	1	22	2	0.00166301	NOTCH3 Intracellular Domain Regulates Transcription	IKZF1	GSL_Core	BRCA_2
TOTAL	647	2	0.0439508	0.0109221	0.0109221	2096	0	0.116072	2540	2	493	1	0.0372666	Signaling by Interleukins	IRF4;IRF4	GSL_Core	BRCA_2
TOTAL	63	1	0.0042796	0.0170088	0.0170088	223	0	0.012841	281	1	37	2	0.00279689	Signaling by NOTCH3	IKZF1	GSL_Core	BRCA_2
TOTAL	1108	2	0.0752666	0.0306755	0.0306755	2824	0	0.165288	3617	2	687	5	0.0519314	Cytokine Signaling in Immune system	IRF4;IRF4	GSL_Core	BRCA_2
TOTAL	258	1	0.017526	0.0682824	0.0682824	753	0	0.0441896	967	1	154	2	0.0116411	Signaling by NOTCH	IKZF1	GSL_Core	BRCA_2
TOTAL	27	3	0.00183436	3.86599e-05	0.00320877	176	0	0.00957873	201	3	22	8	0.00167798	FOXO-mediated transcription of cell cycle genes	SMAD4;KLF4;KLF4	P1PK blood group	CESC
TOTAL	110	4	0.00747333	0.000135716	0.00556437	494	0	0.0277831	583	4	85	13	0.00648311	FOXO-mediated transcription	NFYB;SMAD4;KLF4;KLF4	P1PK blood group	CESC
TOTAL	45	2	0.00305727	0.00520074	0.0841042	227	0	0.0127716	268	2	35	4	0.00266951	Transcriptional regulation of pluripotent stem cells	SMAD4;KLF4	P1PK blood group	CESC
TOTAL	3	1	0.000203818	0.00710897	0.0841042	34	0	0.00162028	34	1	1	1	7.62718e-05	SMAD2/3 MH2 Domain Mutants in Cancer	SMAD4	P1PK blood group	CESC
TOTAL	3	1	0.000203818	0.00710897	0.0841042	0	0	0.000142966	3	1	1	1	7.62718e-05	Loss of Function of SMAD4 in Cancer	SMAD4	P1PK blood group	CESC
TOTAL	3	1	0.000203818	0.00710897	0.0841042	0	0	0.000142966	3	1	1	1	7.62718e-05	SMAD4 MH2 Domain Mutants in Cancer	SMAD4	P1PK blood group	CESC
TOTAL	174	3	0.0118215	0.00815322	0.0841042	363	0	0.0250191	525	3	41	4	0.00312715	PPARA activates gene expression	NFYB;GRHL1;GRHL1	P1PK blood group	CESC
TOTAL	176	3	0.0119573	0.00841042	0.0841042	393	0	0.0262581	551	3	44	4	0.00335596	Regulation of lipid metabolism by PPARalpha	NFYB;GRHL1;GRHL1	P1PK blood group	CESC
TOTAL	401	5	0.0272437	2.44499e-05	0.000613812	602	0	0.0458921	963	5	69	20	0.00526276	Interferon Signaling	STAT1;IRF1;IRF1	Gangliosides	CESC
TOTAL	191	4	0.0129764	2.55755e-05	0.000613812	200	0	0.018109	380	4	22	9	0.00167798	Interferon alpha/beta signaling	STAT1;IRF1;IRF1	Gangliosides	CESC
TOTAL	18	2	0.00122291	0.000134766	0.00215626	109	0	0.00586161	123	2	20	6	0.00152544	Interleukin-6 signaling	STAT1	Gangliosides	CESC
TOTAL	28	2	0.0019023	0.000324335	0.00291901	127	0	0.00724361	152	2	11	4	0.00083899	Signaling by phosphorylated juxtamembrane, extracellular and kinase domain KIT mutants	STAT1	Gangliosides	CESC
TOTAL	28	2	0.0019023	0.000324335	0.00291901	86	0	0.00543271	114	2	5	1	0.000381359	Regulation of IFNA signaling	STAT1	Gangliosides	CESC
TOTAL	31	2	0.00210612	0.000396911	0.00317528	135	0	0.00748189	157	2	34	6	0.00259324	Interleukin-6 family signaling	STAT1	Gangliosides	CESC
TOTAL	43	2	0.00292139	0.000758709	0.00520938	127	0	0.00795844	167	2	26	4	0.00198307	Signaling by KIT in disease	STAT1	Gangliosides	CESC
TOTAL	1332	6	0.0904953	0.000868229	0.00520938	2691	0	0.175229	3677	6	741	70	0.0565174	Cytokine Signaling in Immune system	STAT1;IRF1;STAT1;IRF1	Gangliosides	CESC
TOTAL	255	3	0.0173245	0.00164016	0.00706094	172	0	0.019777	415	3	16	9	0.00122035	Interferon gamma signaling	STAT1;IRF1;IRF1	Gangliosides	CESC
TOTAL	66	2	0.004484	0.00176524	0.00706094	260	0	0.0147255	309	2	39	4	0.0029746	Signaling by SCF-KIT	STAT1	Gangliosides	CESC
TOTAL	12	1	0.000815273	0.0113535	0.0358421	1	0	0.00061952	13	1	5	2	0.000381359	Interleukin-21 signaling	STAT1	Gangliosides	CESC
TOTAL	13	1	0.000883212	0.0122942	0.0358421	192	0	0.00953107	200	1	20	5	0.00152544	Interleukin-27 signaling	STAT1	Gangliosides	CESC
TOTAL	16	1	0.00108703	0.0151114	0.0358421	79	0	0.0044796	94	1	4	2	0.000305087	Regulation of IFNG signaling	STAT1	Gangliosides	CESC
TOTAL	16	1	0.00108703	0.0151114	0.0358421	129	0	0.00676706	142	1	13	6	0.000991534	Interleukin-9 signaling	STAT1	Gangliosides	CESC
TOTAL	16	1	0.00108703	0.0151114	0.0358421	174	0	0.00876859	184	1	26	12	0.00198307	Interleukin-35 Signalling	STAT1	Gangliosides	CESC
TOTAL	216	2	0.0146749	0.0174304	0.0358421	143	0	0.0165364	347	2	47	6	0.00358478	Interleukin-4 and Interleukin-13 signaling	STAT1;STAT1	Gangliosides	CESC
TOTAL	19	1	0.00129085	0.017921	0.0358421	119	0	0.00648113	136	1	7	1	0.000533903	Signaling by PDGFRA extracellular domain mutants	STAT1	Gangliosides	CESC
TOTAL	19	1	0.00129085	0.017921	0.0358421	119	0	0.00648113	136	1	7	1	0.000533903	Signaling by PDGFRA transmembrane, juxtamembrane and kinase domain mutants	STAT1	Gangliosides	CESC
TOTAL	647	3	0.0439568	0.0214744	0.0392158	1886	0	0.111275	2335	3	493	48	0.037602	Signaling by Interleukins	STAT1;STAT1	Gangliosides	CESC
TOTAL	26	1	0.00176642	0.024448	0.0392158	163	0	0.0088639	186	1	14	1	0.00106781	Signaling by cytosolic FGFR1 fusion mutants	STAT1	Gangliosides	CESC
TOTAL	29	1	0.00197024	0.0272329	0.0392158	183	0	0.00962638	202	1	56	11	0.00427122	Interleukin-20 family signaling	STAT1	Gangliosides	CESC
TOTAL	29	1	0.00197024	0.0272329	0.0392158	105	0	0.00609989	128	1	28	2	0.00213561	Growth hormone receptor signaling	STAT1	Gangliosides	CESC
TOTAL	36	1	0.00244582	0.0337024	0.0392158	73	0	0.00500381	105	1	22	4	0.00167798	NOTCH3 Intracellular Domain Regulates Transcription	STAT1	Gangliosides	CESC
TOTAL	37	1	0.00251376	0.0346233	0.0392158	288	0	0.0148208	311	1	16	1	0.00122035	Downstream signal transduction	STAT1	Gangliosides	CESC
TOTAL	42	1	0.00285345	0.0392158	0.0392158	128	0	0.0080061	168	1	24	2	0.00183052	Signaling by PDGFR in disease	STAT1	Gangliosides	CESC
TOTAL	2895	6	0.196685	0.0407265	0.0407265	3765	0	0.281786	5913	6	1647	70	0.12562	Immune System	STAT1;IRF1;STAT1;IRF1	Gangliosides	CESC
TOTAL	48	1	0.00326109	0.0447	0.0447	166	0	0.0100076	210	1	25	1	0.0019068	FGFR1 mutant receptor activation	STAT1	Gangliosides	CESC
TOTAL	52	1	0.00353285	0.04834	0.04834	405	0	0.0205395	431	1	59	8	0.00450004	Interleukin-2 family signaling	STAT1	Gangliosides	CESC
TOTAL	58	1	0.00394049	0.0537758	0.0537758	221	0	0.0129146	271	1	35	1	0.00266951	Signaling by FGFR1 in disease	STAT1	Gangliosides	CESC
TOTAL	63	1	0.00428018	0.0582836	0.0582836	190	0	0.0118185	248	1	37	4	0.00282206	Signaling by NOTCH3	STAT1	Gangliosides	CESC
TOTAL	71	1	0.0048237	0.0654547	0.0654547	333	0	0.0186809	392	1	27	2	0.00205934	Transcriptional regulation of granulopoiesis	FLI1	Gangliosides	CESC
TOTAL	83	1	0.00563897	0.0761162	0.0761162	243	0	0.0151544	318	1	16	2	0.00122035	ISG15 antiviral mechanism	STAT1	Gangliosides	CESC
TOTAL	83	1	0.00563897	0.0761162	0.0761162	156	0	0.0112467	236	1	32	2	0.0024407	Regulation of RUNX2 expression and activity	STAT1	Gangliosides	CESC
TOTAL	86	1	0.00584279	0.0787639	0.0787639	302	0	0.0176801	371	1	31	1	0.00236443	Signaling by PDGF	STAT1	Gangliosides	CESC
TOTAL	501	2	0.0340376	0.0804078	0.0804078	1037	0	0.0676706	1420	2	396	7	0.0302036	Diseases of signal transduction by growth factor receptors and second messengers	STAT1	Gangliosides	CESC
TOTAL	94	1	0.0063863	0.08579	0.08579	293	0	0.0179184	376	1	31	2	0.00236443	Antiviral mechanism by IFN-stimulated genes	STAT1	Gangliosides	CESC
TOTAL	95	1	0.00645424	0.0866647	0.0866647	226	0	0.0147255	309	1	106	1	0.00808481	Signaling by FGFR in disease	STAT1	Gangliosides	CESC
TOTAL	96	1	0.00652218	0.0875387	0.0875387	597	0	0.032215	676	1	114	17	0.00869499	Interleukin-12 family signaling	STAT1	Gangliosides	CESC
TOTAL	114	2	0.00774509	0.00314945	0.0787362	258	0	0.016727	351	2	40	4	0.00305087	Oxidative Stress Induced Senescence	EED;EED	Dolichol Pathway	CESC
TOTAL	94	1	0.0063863	0.0253015	0.0759046	140	0	0.0106748	224	1	11	5	0.00083899	RNA polymerase II transcribes snRNA genes	CPSF3L	CS HS Initiation	CESC
TOTAL	27	2	0.00183436	0.000347743	0.0114755	176	0	0.00957873	201	2	22	2	0.00167798	FOXO-mediated transcription of cell cycle genes	KLF4;KLF4	Hyaluronan synthesis	CESC
TOTAL	110	2	0.00747333	0.005497	0.087952	494	0	0.0277831	583	2	85	2	0.00648311	FOXO-mediated transcription	KLF4;KLF4	Hyaluronan synthesis	CESC
TOTAL	10	1	0.000679394	0.0101426	0.0897811	5	0	0.00071483	15	1	5	2	0.000381359	Activation of PUMA and translocation to mitochondria	TP63	Hyaluronan synthesis	CESC
TOTAL	17	1	0.00115497	0.0171852	0.0897811	162	0	0.008435	177	1	11	2	0.00083899	Regulation of TP53 Activity through Association with Co-factors	TP63	Hyaluronan synthesis	CESC
TOTAL	18	1	0.00122291	0.0181874	0.0897811	19	0	0.00162028	34	1	7	2	0.000533903	TP53 Regulates Transcription of Death Receptors and Ligands	TP63	Hyaluronan synthesis	CESC
TOTAL	20	1	0.00135879	0.0201891	0.0897811	67	0	0.00386008	81	1	17	2	0.00129662	TP53 Regulates Transcription of Caspase Activators and Caspases	TP63	Hyaluronan synthesis	CESC
TOTAL	26	1	0.00176642	0.0261712	0.0897811	18	0	0.00204918	43	1	8	1	0.000610175	Synthesis, secretion, and deacylation of Ghrelin	KLF4	Hyaluronan synthesis	CESC
TOTAL	28	1	0.0019023	0.0281577	0.0897811	98	0	0.0057663	121	1	19	4	0.00144916	TP53 regulates transcription of several additional cell death genes whose specific roles in p53-dependent apoptosis remain uncertain	TP63	Hyaluronan synthesis	CESC
TOTAL	33	1	0.002242	0.0331073	0.0897811	133	0	0.00767251	161	1	25	4	0.0019068	TP53 Regulates Transcription of Genes Involved in Cytochrome C Release	TP63	Hyaluronan synthesis	CESC
TOTAL	36	1	0.00244582	0.0360658	0.0897811	63	0	0.00414602	87	1	19	2	0.00144916	Activation of BH3-only proteins	TP63	Hyaluronan synthesis	CESC
TOTAL	44	1	0.00298933	0.0439138	0.0897811	3	0	0.0022398	47	1	4	2	0.000305087	PRC2 methylates histones and DNA	JARID2	Hyaluronan synthesis	CESC
TOTAL	45	1	0.00305727	0.0448906	0.0897811	227	0	0.0127716	268	1	35	2	0.00266951	Transcriptional regulation of pluripotent stem cells	KLF4	Hyaluronan synthesis	CESC
TOTAL	87	2	0.00591073	0.00152335	0.0350371	193	0	0.0127716	268	2	32	16	0.0024407	Transcriptional activation of mitochondrial biogenesis	NRF1;NRF1	O-mannose	CESC
TOTAL	127	2	0.0086283	0.00319942	0.0351936	324	0	0.0206348	433	2	36	16	0.00274579	Mitochondrial biogenesis	NRF1;NRF1	O-mannose	CESC
TOTAL	27	3	0.00183436	3.86599e-05	0.00320877	176	0	0.00957873	201	3	22	8	0.00167798	FOXO-mediated transcription of cell cycle genes	SMAD4;KLF4;KLF4	Type 1 and 2 LacNAc	CESC
TOTAL	110	4	0.00747333	0.000135716	0.00556437	494	0	0.0277831	583	4	85	13	0.00648311	FOXO-mediated transcription	NFYB;SMAD4;KLF4;KLF4	Type 1 and 2 LacNAc	CESC
TOTAL	45	2	0.00305727	0.00520074	0.0841042	227	0	0.0127716	268	2	35	4	0.00266951	Transcriptional regulation of pluripotent stem cells	SMAD4;KLF4	Type 1 and 2 LacNAc	CESC
TOTAL	3	1	0.000203818	0.00710897	0.0841042	34	0	0.00162028	34	1	1	1	7.62718e-05	SMAD2/3 MH2 Domain Mutants in Cancer	SMAD4	Type 1 and 2 LacNAc	CESC
TOTAL	3	1	0.000203818	0.00710897	0.0841042	0	0	0.000142966	3	1	1	1	7.62718e-05	Loss of Function of SMAD4 in Cancer	SMAD4	Type 1 and 2 LacNAc	CESC
TOTAL	3	1	0.000203818	0.00710897	0.0841042	0	0	0.000142966	3	1	1	1	7.62718e-05	SMAD4 MH2 Domain Mutants in Cancer	SMAD4	Type 1 and 2 LacNAc	CESC
TOTAL	174	3	0.0118215	0.00815322	0.0841042	363	0	0.0250191	525	3	41	4	0.00312715	PPARA activates gene expression	NFYB;GRHL1;GRHL1	Type 1 and 2 LacNAc	CESC
TOTAL	176	3	0.0119573	0.00841042	0.0841042	393	0	0.0262581	551	3	44	4	0.00335596	Regulation of lipid metabolism by PPARalpha	NFYB;GRHL1;GRHL1	Type 1 and 2 LacNAc	CESC
TOTAL	4	2	0.000271758	4.11916e-05	0.00378963	0	0	0.000190621	4	2	2	2	0.000152544	RUNX3 regulates RUNX1-mediated transcription	RUNX1	sialylation	CESC
TOTAL	118	4	0.00801685	0.000158056	0.00727058	378	0	0.022398	470	4	47	9	0.00358478	Transcriptional regulation by RUNX3	RUNX1;LEF1;RUNX1	sialylation	CESC
TOTAL	71	3	0.0048237	0.000600504	0.0180151	333	0	0.0186809	392	3	27	4	0.00205934	Transcriptional regulation of granulopoiesis	RUNX1;LEF1;FLI1	sialylation	CESC
TOTAL	18	2	0.00122291	0.0008174	0.0188002	109	0	0.00586161	123	2	20	6	0.00152544	Interleukin-6 signaling	STAT1	sialylation	CESC
TOTAL	28	2	0.0019023	0.00194953	0.0278483	127	0	0.00724361	152	2	11	4	0.00083899	Signaling by phosphorylated juxtamembrane, extracellular and kinase domain KIT mutants	STAT1	sialylation	CESC
TOTAL	28	2	0.0019023	0.00194953	0.0278483	86	0	0.00543271	114	2	5	1	0.000381359	Regulation of IFNA signaling	STAT1	sialylation	CESC
TOTAL	31	2	0.00210612	0.00237934	0.0278483	135	0	0.00748189	157	2	34	6	0.00259324	Interleukin-6 family signaling	STAT1	sialylation	CESC
TOTAL	32	2	0.00217406	0.00253166	0.0278483	137	0	0.00781548	164	2	19	18	0.00144916	Regulation of RUNX1 Expression and Activity	RUNX1;RUNX1	sialylation	CESC
TOTAL	43	2	0.00292139	0.00449938	0.0449938	127	0	0.00795844	167	2	26	4	0.00198307	Signaling by KIT in disease	STAT1	sialylation	CESC
TOTAL	66	2	0.004484	0.0102549	0.0906269	260	0	0.0147255	309	2	39	4	0.0029746	Signaling by SCF-KIT	STAT1	sialylation	CESC
TOTAL	6	1	0.000407636	0.0137668	0.0906269	18	0	0.00109607	23	1	2	1	0.000152544	RUNX2 regulates genes involved in differentiation of myeloid cells	RUNX1	sialylation	CESC
TOTAL	7	1	0.000475576	0.0160433	0.0906269	74	0	0.00381243	80	1	4	4	0.000305087	RUNX1 regulates transcription of genes involved in BCR signaling	RUNX1	sialylation	CESC
TOTAL	7	1	0.000475576	0.0160433	0.0906269	5	0	0.000571864	12	1	5	5	0.000381359	RUNX1 regulates transcription of genes involved in interleukin signaling	RUNX1	sialylation	CESC
TOTAL	8	1	0.000543515	0.0183147	0.0906269	50	0	0.00276401	58	1	6	6	0.000457631	RUNX1 regulates expression of components of tight junctions	RUNX1	sialylation	CESC
TOTAL	9	1	0.000611455	0.0205811	0.0906269	63	0	0.00338353	71	1	4	4	0.000305087	RUNX1 regulates transcription of genes involved in WNT signaling	RUNX1	sialylation	CESC
TOTAL	10	1	0.000679394	0.0228423	0.0906269	141	0	0.00700534	147	1	5	5	0.000381359	RUNX3 regulates WNT signaling	LEF1	sialylation	CESC
TOTAL	10	1	0.000679394	0.0228423	0.0906269	157	0	0.00791079	166	1	4	4	0.000305087	Binding of TCF/LEF:CTNNB1 to target gene promoters	LEF1	sialylation	CESC
TOTAL	10	1	0.000679394	0.0228423	0.0906269	95	0	0.0049085	103	1	8	7	0.000610175	RUNX1 regulates estrogen receptor mediated transcription	RUNX1	sialylation	CESC
TOTAL	11	1	0.000747333	0.0250985	0.0906269	55	0	0.0030976	65	1	7	7	0.000533903	RUNX1 regulates transcription of genes involved in differentiation of myeloid cells	RUNX1	sialylation	CESC
TOTAL	11	1	0.000747333	0.0250985	0.0906269	22	0	0.00157263	33	1	8	6	0.000610175	RUNX1 regulates transcription of genes involved in differentiation of keratinocytes	RUNX1	sialylation	CESC
TOTAL	12	1	0.000815273	0.0273496	0.0906269	1	0	0.00061952	13	1	5	2	0.000381359	Interleukin-21 signaling	STAT1	sialylation	CESC
TOTAL	13	1	0.000883212	0.0295957	0.0906269	192	0	0.00953107	200	1	20	5	0.00152544	Interleukin-27 signaling	STAT1	sialylation	CESC
TOTAL	16	1	0.00108703	0.0363038	0.0906269	252	0	0.0127716	268	1	7	4	0.000533903	Repression of WNT target genes	LEF1	sialylation	CESC
TOTAL	16	1	0.00108703	0.0363038	0.0906269	79	0	0.0044796	94	1	4	2	0.000305087	Regulation of IFNG signaling	STAT1	sialylation	CESC
TOTAL	16	1	0.00108703	0.0363038	0.0906269	129	0	0.00676706	142	1	13	6	0.000991534	Interleukin-9 signaling	STAT1	sialylation	CESC
TOTAL	16	1	0.00108703	0.0363038	0.0906269	174	0	0.00876859	184	1	26	12	0.00198307	Interleukin-35 Signalling	STAT1	sialylation	CESC
TOTAL	16	1	0.00108703	0.0363038	0.0906269	98	0	0.0053374	112	1	8	2	0.000610175	RUNX3 regulates p14-ARF	RUNX1	sialylation	CESC
TOTAL	17	1	0.00115497	0.0385298	0.0906269	38	0	0.00252573	53	1	20	20	0.00152544	RUNX1 and FOXP3 control the development of regulatory T lymphocytes (Tregs)	RUNX1	sialylation	CESC
TOTAL	19	1	0.00129085	0.0429668	0.0906269	119	0	0.00648113	136	1	7	1	0.000533903	Signaling by PDGFRA transmembrane, juxtamembrane and kinase domain mutants	STAT1	sialylation	CESC
TOTAL	19	1	0.00129085	0.0429668	0.0906269	119	0	0.00648113	136	1	7	1	0.000533903	Signaling by PDGFRA extracellular domain mutants	STAT1	sialylation	CESC
TOTAL	147	2	0.00998709	0.0453134	0.0906269	485	0	0.0289268	607	2	84	3	0.00640683	Transcriptional regulation by RUNX2	RUNX1;STAT1	sialylation	CESC
TOTAL	45	3	0.00305727	9.83785e-05	0.00277685	227	0	0.0127716	268	3	35	29	0.00266951	Transcriptional regulation of pluripotent stem cells	SOX2;SOX2;GATA6	fucosylation	CESC
TOTAL	10	2	0.000679394	0.000185123	0.00277685	13	0	0.00100076	21	2	7	7	0.000533903	POU5F1 (OCT4), SOX2, NANOG repress genes related to differentiation	SOX2;GATA6	fucosylation	CESC
TOTAL	216	3	0.0146749	0.00868393	0.0686315	143	0	0.0165364	347	3	47	15	0.00358478	Interleukin-4 and Interleukin-13 signaling	STAT6;SOX2;SOX2	fucosylation	CESC
TOTAL	5	1	0.000339697	0.00980451	0.0686315	40	0	0.00200152	42	1	6	6	0.000457631	STAT6-mediated induction of chemokines	STAT6	fucosylation	CESC
TOTAL	45	2	0.00305727	0.00123293	0.0221032	227	0	0.0127716	268	2	35	28	0.00266951	Transcriptional regulation of pluripotent stem cells	SOX2;SOX2	ABO blood group	CESC
TOTAL	216	3	0.0146749	0.00184194	0.0221032	143	0	0.0165364	347	3	47	15	0.00358478	Interleukin-4 and Interleukin-13 signaling	STAT6;SOX2;SOX2	ABO blood group	CESC
TOTAL	71	2	0.0048237	0.00301561	0.0241249	333	0	0.0186809	392	2	27	2	0.00205934	Transcriptional regulation of granulopoiesis	KLF5;KLF5	ABO blood group	CESC
TOTAL	5	1	0.000339697	0.00575918	0.0340247	40	0	0.00200152	42	1	6	6	0.000457631	STAT6-mediated induction of chemokines	STAT6	ABO blood group	CESC
TOTAL	108	2	0.00733745	0.00680493	0.0340247	414	0	0.0236847	497	2	18	2	0.00137289	Transcriptional regulation of white adipocyte differentiation	KLF5;KLF5	ABO blood group	CESC
TOTAL	10	1	0.000679394	0.0114871	0.0459485	13	0	0.00100076	21	1	7	6	0.000533903	POU5F1 (OCT4), SOX2, NANOG repress genes related to differentiation	SOX2	ABO blood group	CESC
TOTAL	21	1	0.00142673	0.0239795	0.0719385	130	0	0.00700534	147	1	16	16	0.00122035	POU5F1 (OCT4), SOX2, NANOG activate genes related to proliferation	SOX2	ABO blood group	CESC
TOTAL	24	1	0.00163055	0.0273606	0.0727684	151	0	0.00805376	169	1	19	6	0.00144916	STING mediated induction of host immune responses	STAT6	ABO blood group	CESC
TOTAL	647	3	0.0439568	0.0363842	0.0727684	1886	0	0.111275	2335	3	493	15	0.037602	Signaling by Interleukins	STAT6;SOX2;SOX2	ABO blood group	CESC
TOTAL	37	1	0.00251376	0.0418852	0.0837704	288	0	0.0148208	311	1	16	1	0.00122035	Downstream signal transduction	STAT6	ABO blood group	CESC
TOTAL	44	1	0.00298933	0.0496213	0.0863678	445	0	0.022398	470	1	14	1	0.00106781	Deactivation of the beta-catenin transactivating complex	SOX2	ABO blood group	CESC
TOTAL	1243	4	0.0844487	0.0496416	0.0863678	2923	0	0.182377	3827	4	538	32	0.0410342	Developmental Biology	SOX2;SOX2;KLF5;KLF5	ABO blood group	CESC
TOTAL	78	1	0.00529927	0.0863678	0.0863678	332	0	0.0186809	392	1	49	6	0.00373732	Cytosolic sensors of pathogen-associated DNA	STAT6	ABO blood group	CESC
TOTAL	86	1	0.00584279	0.0948175	0.0948175	302	0	0.0176801	371	1	31	1	0.00236443	Signaling by PDGF	STAT6	ABO blood group	CESC
TOTAL	17	2	0.00115497	0.000303437	0.0142615	38	0	0.00252573	53	2	20	13	0.00152544	RUNX1 and FOXP3 control the development of regulatory T lymphocytes (Tregs)	FOXP3;FOXP3	Gangliosides	COAD_READ.
TOTAL	36	2	0.00244582	0.00133756	0.0231819	73	0	0.00500381	105	2	22	2	0.00167798	NOTCH3 Intracellular Domain Regulates Transcription	HEYL;HEYL	Gangliosides	COAD_READ.
TOTAL	57	2	0.00387255	0.00329019	0.0231819	247	0	0.0138677	291	2	18	2	0.00137289	NOTCH1 Intracellular Domain Regulates Transcription	HEYL;HEYL	Gangliosides	COAD_READ.
TOTAL	63	2	0.00428018	0.00399762	0.0231819	190	0	0.0118185	248	2	37	2	0.00282206	Signaling by NOTCH3	HEYL;HEYL	Gangliosides	COAD_READ.
TOTAL	68	2	0.00461988	0.00463638	0.0231819	212	0	0.0128193	269	2	21	2	0.00160171	Constitutive Signaling by NOTCH1 PEST Domain Mutants	HEYL;HEYL	Gangliosides	COAD_READ.
TOTAL	68	2	0.00461988	0.00463638	0.0231819	212	0	0.0128193	269	2	21	2	0.00160171	Signaling by NOTCH1 HD+PEST Domain Mutants in Cancer	HEYL;HEYL	Gangliosides	COAD_READ.
TOTAL	68	2	0.00461988	0.00463638	0.0231819	212	0	0.0128193	269	2	21	2	0.00160171	Constitutive Signaling by NOTCH1 HD+PEST Domain Mutants	HEYL;HEYL	Gangliosides	COAD_READ.
TOTAL	68	2	0.00461988	0.00463638	0.0231819	212	0	0.0128193	269	2	21	2	0.00160171	Signaling by NOTCH1 PEST Domain Mutants in Cancer	HEYL;HEYL	Gangliosides	COAD_READ.
TOTAL	68	2	0.00461988	0.00463638	0.0231819	212	0	0.0128193	269	2	39	2	0.0029746	Signaling by NOTCH1 in Cancer	HEYL;HEYL	Gangliosides	COAD_READ.
TOTAL	84	2	0.00570691	0.00697358	0.0278943	280	0	0.0165841	348	2	39	2	0.0029746	Signaling by NOTCH1	HEYL;HEYL	Gangliosides	COAD_READ.
TOTAL	6	1	0.000407636	0.00892972	0.0357189	168	0	0.00829203	174	1	4	3	0.000305087	TFAP2 (AP-2) family regulates transcription of cell cycle factors	KDM5B	Gangliosides	COAD_READ.
TOTAL	9	1	0.000611455	0.013366	0.040098	63	0	0.00338353	71	1	4	2	0.000305087	RUNX1 regulates transcription of genes involved in WNT signaling	FOXP3	Gangliosides	COAD_READ.
TOTAL	191	2	0.0129764	0.0327527	0.0574568	200	0	0.018109	380	2	22	2	0.00167798	Interferon alpha/beta signaling	IRF4;IRF4	Gangliosides	COAD_READ.
TOTAL	23	1	0.00156261	0.0338191	0.0574568	60	0	0.00390774	82	1	6	1	0.000457631	RHO GTPases activate CIT	MYH11	Gangliosides	COAD_READ.
TOTAL	26	1	0.00176642	0.038149	0.0574568	38	0	0.00300229	63	1	7	2	0.000533903	RHO GTPases Activate ROCKs	MYH11	Gangliosides	COAD_READ.
TOTAL	26	1	0.00176642	0.038149	0.0574568	33	0	0.00271636	57	1	7	1	0.000533903	Sema4D induced cell migration and growth-cone collapse	MYH11	Gangliosides	COAD_READ.
TOTAL	27	1	0.00183436	0.0395881	0.0574568	71	0	0.00443195	93	1	15	3	0.00114408	RHO GTPases activate PAKs	MYH11	Gangliosides	COAD_READ.
TOTAL	216	2	0.0146749	0.0409625	0.0574568	143	0	0.0165364	347	2	47	1	0.00358478	Interleukin-4 and Interleukin-13 signaling	IRF4;IRF4	Gangliosides	COAD_READ.
TOTAL	31	1	0.00210612	0.0453243	0.0574568	69	0	0.00462257	97	1	17	2	0.00129662	HDMs demethylate histones	KDM5B	Gangliosides	COAD_READ.
TOTAL	32	1	0.00217406	0.0467532	0.0574568	33	0	0.00300229	63	1	13	1	0.000991534	Sema4D in semaphorin signaling	MYH11	Gangliosides	COAD_READ.
TOTAL	33	1	0.002242	0.04818	0.0574568	34	0	0.0030976	65	1	4	1	0.000305087	EPHA-mediated growth cone collapse	MYH11	Gangliosides	COAD_READ.
TOTAL	255	2	0.0173245	0.0551391	0.0574568	172	0	0.019777	415	2	16	2	0.00122035	Interferon gamma signaling	IRF4;IRF4	Gangliosides	COAD_READ.
TOTAL	258	2	0.0175284	0.0562936	0.0574568	670	0	0.0421273	884	2	154	4	0.0117459	Signaling by NOTCH	HEYL;HEYL	Gangliosides	COAD_READ.
TOTAL	261	2	0.0177322	0.0574568	0.0574568	830	0	0.0498952	1047	2	132	15	0.0100679	Transcriptional regulation by RUNX1	FOXP3;FOXP3	Gangliosides	COAD_READ.
TOTAL	52	1	0.00353285	0.0749063	0.0749063	1025	0	0.0505147	1060	1	44	3	0.00335596	Transcriptional regulation by the AP-2 (TFAP2) family of transcription factors	KDM5B	Gangliosides	COAD_READ.
TOTAL	55	1	0.00373667	0.0790602	0.0790602	94	0	0.00700534	147	1	11	4	0.00083899	Smooth Muscle Contraction	MYH11	Gangliosides	COAD_READ.
TOTAL	20	4	0.00135879	1.27119e-06	0.000132204	94	0	0.00505147	106	4	17	6	0.00129662	TP53 Regulates Transcription of Genes Involved in G1 Cell Cycle Arrest	E2F7;E2F1;E2F1;E2F7	Dolichol Pathway	COAD_READ.
TOTAL	65	5	0.00441606	5.80839e-06	0.000302036	332	0	0.0178708	375	5	42	8	0.00320342	TP53 Regulates Transcription of Cell Cycle Genes	E2F7;E2F1;E2F4;E2F1;E2F7	Dolichol Pathway	COAD_READ.
TOTAL	46	4	0.00312521	3.30114e-05	0.00112239	323	0	0.0166317	349	4	33	15	0.00251697	Transcriptional Regulation by E2F6	E2F1;CBX3;EED;E2F1	Dolichol Pathway	COAD_READ.
TOTAL	20	3	0.00135879	6.94802e-05	0.00180648	70	0	0.00390774	82	3	8	8	0.000610175	Transcription of E2F targets under negative control by p107 (RBL1) and p130 (RBL2) in complex with HDAC1	E2F1;E2F4;E2F1	Dolichol Pathway	COAD_READ.
TOTAL	25	3	0.00169848	0.000133855	0.00267709	103	0	0.00595692	125	3	12	12	0.000915262	Transcription of E2F targets under negative control by DREAM complex	E2F1;E2F4;E2F1	Dolichol Pathway	COAD_READ.
TOTAL	7	2	0.000475576	0.000354737	0.00496631	74	0	0.00381243	80	2	4	4	0.000305087	RUNX1 regulates transcription of genes involved in BCR signaling	CBFB;ELF1	Dolichol Pathway	COAD_READ.
TOTAL	7	2	0.000475576	0.000354737	0.00496631	5	0	0.000571864	12	2	5	5	0.000381359	RUNX1 regulates transcription of genes involved in interleukin signaling	CBFB;ELF1	Dolichol Pathway	COAD_READ.
TOTAL	38	3	0.0025817	0.000453622	0.00589708	284	0	0.0143443	301	3	27	24	0.00205934	G0 and Early G1	E2F1;E2F4;E2F1	Dolichol Pathway	COAD_READ.
TOTAL	6	1	0.000407636	0.00406889	0.024391	3	0	0.000428898	9	1	3	3	0.000228815	p75NTR negatively regulates cell cycle via SC1	PRDM4	N-glycan branching	COAD_READ.
TOTAL	9	1	0.000611455	0.00609775	0.024391	0	0	0.000428898	9	1	5	3	0.000381359	Small interfering RNA (siRNA) biogenesis	DICER1	N-glycan branching	COAD_READ.
TOTAL	31	1	0.00210612	0.0208627	0.0417254	4	0	0.00166794	35	1	8	3	0.000610175	MicroRNA (miRNA) biogenesis	DICER1	N-glycan branching	COAD_READ.
TOTAL	109	1	0.00740539	0.0716343	0.0767052	422	0	0.0242566	509	1	50	3	0.00381359	p75 NTR receptor-mediated signalling	PRDM4	N-glycan branching	COAD_READ.
TOTAL	117	1	0.00794891	0.0767052	0.0767052	36	0	0.00710065	149	1	36	6	0.00274579	Gene Silencing by RNA	DICER1	N-glycan branching	COAD_READ.
TOTAL	27	2	0.00183436	0.000258955	0.00543805	176	0	0.00957873	201	2	22	2	0.00167798	FOXO-mediated transcription of cell cycle genes	KLF4;KLF4	GalNAc-type O-glycans	COAD_READ.
TOTAL	110	2	0.00747333	0.00412418	0.0412418	494	0	0.0277831	583	2	85	2	0.00648311	FOXO-mediated transcription	KLF4;KLF4	GalNAc-type O-glycans	COAD_READ.
TOTAL	26	1	0.00176642	0.0227217	0.0813769	18	0	0.00204918	43	1	8	1	0.000610175	Synthesis, secretion, and deacylation of Ghrelin	KLF4	GalNAc-type O-glycans	COAD_READ.
TOTAL	30	1	0.00203818	0.0261747	0.0813769	48	0	0.00347884	73	1	17	9	0.00129662	Signaling by BMP	SMAD1	GalNAc-type O-glycans	COAD_READ.
TOTAL	39	1	0.00264964	0.033903	0.0813769	59	0	0.0044796	94	1	5	1	0.000381359	RUNX1 interacts with co-factors whose precise effect on RUNX1 targets is not known	AUTS2	GalNAc-type O-glycans	COAD_READ.
TOTAL	43	1	0.00292139	0.0373195	0.0813769	246	0	0.0134388	282	1	32	3	0.0024407	RUNX2 regulates bone development	SMAD1	GalNAc-type O-glycans	COAD_READ.
TOTAL	45	1	0.00305727	0.0390236	0.0813769	227	0	0.0127716	268	1	35	2	0.00266951	Transcriptional regulation of pluripotent stem cells	KLF4	GalNAc-type O-glycans	COAD_READ.
TOTAL	1554	4	0.105578	0.0406884	0.0813769	3712	0	0.22927	4811	4	824	6	0.062848	Generic Transcription Pathway	SMAD1;AUTS2;KLF4;KLF4	GalNAc-type O-glycans	COAD_READ.
TOTAL	1693	4	0.115021	0.0533496	0.0912985	3857	0	0.239802	5032	4	885	6	0.0675006	RNA Polymerase II Transcription	SMAD1;AUTS2;KLF4;KLF4	GalNAc-type O-glycans	COAD_READ.
TOTAL	1851	4	0.125756	0.070235	0.0912985	4048	0	0.253241	5314	4	996	6	0.0759667	Gene expression (Transcription)	SMAD1;AUTS2;KLF4;KLF4	GalNAc-type O-glycans	COAD_READ.
TOTAL	108	1	0.00733745	0.0912985	0.0912985	414	0	0.0236847	497	1	18	1	0.00137289	Transcriptional regulation of white adipocyte differentiation	KLF4	GalNAc-type O-glycans	COAD_READ.
TOTAL	114	1	0.00774509	0.0961376	0.0961376	756	0	0.0397446	834	1	107	9	0.00816109	Signaling by TGFB family members	SMAD1	GalNAc-type O-glycans	COAD_READ.
TOTAL	4	2	0.000271758	2.03021e-05	0.000345136	0	0	0.000190621	4	2	2	2	0.000152544	RUNX3 regulates RUNX1-mediated transcription	RUNX1	CS-DS extension	COAD_READ.
TOTAL	118	4	0.00801685	3.86049e-05	0.000501864	378	0	0.022398	470	4	47	9	0.00358478	Transcriptional regulation by RUNX3	RUNX1;LEF1;RUNX1	CS-DS extension	COAD_READ.
TOTAL	7	2	0.000475576	6.19898e-05	0.000619898	36	0	0.00200152	42	2	4	4	0.000305087	RUNX2 regulates chondrocyte maturation	RUNX2	CS-DS extension	COAD_READ.
TOTAL	147	4	0.00998709	9.00897e-05	0.000720718	485	0	0.0289268	607	4	84	81	0.00640683	Transcriptional regulation by RUNX2	RUNX1;RUNX2;RUNX2	CS-DS extension	COAD_READ.
TOTAL	14	2	0.000951152	0.000246237	0.00172366	5	0	0.000905452	19	2	7	7	0.000533903	RUNX2 regulates genes involved in cell migration	RUNX2	CS-DS extension	COAD_READ.
TOTAL	83	3	0.00563897	0.000332099	0.00199259	156	0	0.0112467	236	3	32	32	0.0024407	Regulation of RUNX2 expression and activity	RUNX2;RUNX2	CS-DS extension	COAD_READ.
TOTAL	18	2	0.00122291	0.000405427	0.00202714	138	0	0.00710065	149	2	9	1	0.000686446	YAP1- and WWTR1 (TAZ)-stimulated gene expression	RUNX2	CS-DS extension	COAD_READ.
TOTAL	261	4	0.0177322	0.000790762	0.00395381	830	0	0.0498952	1047	4	132	123	0.0100679	Transcriptional regulation by RUNX1	RUNX1;RUNX2;RUNX1	CS-DS extension	COAD_READ.
TOTAL	32	2	0.00217406	0.00126363	0.00505453	137	0	0.00781548	164	2	19	18	0.00144916	Regulation of RUNX1 Expression and Activity	RUNX1;RUNX1	CS-DS extension	COAD_READ.
TOTAL	34	2	0.00230994	0.00142369	0.00569476	210	0	0.0115326	242	2	24	21	0.00183052	RUNX2 regulates osteoblast differentiation	RUNX2	CS-DS extension	COAD_READ.
TOTAL	43	2	0.00292139	0.00225689	0.00902757	246	0	0.0134388	282	2	32	29	0.0024407	RUNX2 regulates bone development	RUNX2	CS-DS extension	COAD_READ.
TOTAL	71	2	0.0048237	0.00598447	0.0179534	333	0	0.0186809	392	2	27	4	0.00205934	Transcriptional regulation of granulopoiesis	RUNX1;LEF1	CS-DS extension	COAD_READ.
TOTAL	1554	7	0.105578	0.00998078	0.0257652	3712	0	0.22927	4811	7	824	214	0.062848	Generic Transcription Pathway	RUNX1;RUNX2;LEF1;RUNX1;RUNX2	CS-DS extension	COAD_READ.
TOTAL	7	1	0.000475576	0.0113516	0.0257652	74	0	0.00381243	80	1	4	4	0.000305087	RUNX1 regulates transcription of genes involved in BCR signaling	RUNX1	CS-DS extension	COAD_READ.
TOTAL	7	1	0.000475576	0.0113516	0.0257652	5	0	0.000571864	12	1	5	5	0.000381359	RUNX1 regulates transcription of genes involved in interleukin signaling	RUNX1	CS-DS extension	COAD_READ.
TOTAL	8	1	0.000543515	0.0129632	0.0257652	50	0	0.00276401	58	1	6	6	0.000457631	RUNX1 regulates expression of components of tight junctions	RUNX1	CS-DS extension	COAD_READ.
TOTAL	9	1	0.000611455	0.0145722	0.0257652	63	0	0.00338353	71	1	4	4	0.000305087	RUNX1 regulates transcription of genes involved in WNT signaling	RUNX1	CS-DS extension	COAD_READ.
TOTAL	1693	7	0.115021	0.0156459	0.0257652	3857	0	0.239802	5032	7	885	214	0.0675006	RNA Polymerase II Transcription	RUNX1;RUNX2;LEF1;RUNX1;RUNX2	CS-DS extension	COAD_READ.
TOTAL	10	1	0.000679394	0.0161787	0.0257652	141	0	0.00700534	147	1	5	5	0.000381359	RUNX3 regulates WNT signaling	LEF1	CS-DS extension	COAD_READ.
TOTAL	10	1	0.000679394	0.0161787	0.0257652	157	0	0.00791079	166	1	4	4	0.000305087	Binding of TCF/LEF:CTNNB1 to target gene promoters	LEF1	CS-DS extension	COAD_READ.
TOTAL	10	1	0.000679394	0.0161787	0.0257652	95	0	0.0049085	103	1	8	7	0.000610175	RUNX1 regulates estrogen receptor mediated transcription	RUNX1	CS-DS extension	COAD_READ.
TOTAL	11	1	0.000747333	0.0177827	0.0257652	22	0	0.00157263	33	1	8	6	0.000610175	RUNX1 regulates transcription of genes involved in differentiation of keratinocytes	RUNX1	CS-DS extension	COAD_READ.
TOTAL	1851	7	0.125756	0.0246113	0.0257652	4048	0	0.253241	5314	7	996	214	0.0759667	Gene expression (Transcription)	RUNX1;RUNX2;LEF1;RUNX1;RUNX2	CS-DS extension	COAD_READ.
TOTAL	16	1	0.00108703	0.0257652	0.0257652	252	0	0.0127716	268	1	7	4	0.000533903	Repression of WNT target genes	LEF1	CS-DS extension	COAD_READ.
TOTAL	16	1	0.00108703	0.0257652	0.0257652	98	0	0.0053374	112	1	8	2	0.000610175	RUNX3 regulates p14-ARF	RUNX1	CS-DS extension	COAD_READ.
TOTAL	17	1	0.00115497	0.0273542	0.0273542	38	0	0.00252573	53	1	20	20	0.00152544	RUNX1 and FOXP3 control the development of regulatory T lymphocytes (Tregs)	RUNX1	CS-DS extension	COAD_READ.
TOTAL	39	1	0.00264964	0.0616907	0.0616907	59	0	0.0044796	94	1	5	5	0.000381359	RUNX1 interacts with co-factors whose precise effect on RUNX1 targets is not known	RUNX1	CS-DS extension	COAD_READ.
TOTAL	39	1	0.00264964	0.0616907	0.0616907	11	0	0.00238277	50	1	9	1	0.000686446	Organic cation transport	RUNX1	CS-DS extension	COAD_READ.
TOTAL	44	1	0.00298933	0.0693309	0.0693309	445	0	0.022398	470	1	14	3	0.00106781	Deactivation of the beta-catenin transactivating complex	LEF1	CS-DS extension	COAD_READ.
TOTAL	48	1	0.00326109	0.0754	0.0754	394	0	0.0206348	433	1	13	2	0.000991534	Transcriptional Regulation by VENTX	LEF1	CS-DS extension	COAD_READ.
TOTAL	51	1	0.00346491	0.079927	0.079927	12	0	0.00300229	63	1	12	1	0.000915262	Organic cation/anion/zwitterion transport	RUNX1	CS-DS extension	COAD_READ.
TOTAL	46	4	0.00312521	6.4679e-06	0.000937845	323	0	0.0166317	349	4	33	10	0.00251697	Transcriptional Regulation by E2F6	E2F1;BRCA1;BRCA1;E2F1	GPI anchor extension	COAD_READ.
TOTAL	20	2	0.00135879	0.00125637	0.0461681	70	0	0.00390774	82	2	8	3	0.000610175	Transcription of E2F targets under negative control by p107 (RBL1) and p130 (RBL2) in complex with HDAC1	E2F1;E2F1	GPI anchor extension	COAD_READ.
TOTAL	20	2	0.00135879	0.00125637	0.0461681	94	0	0.00505147	106	2	17	2	0.00129662	TP53 Regulates Transcription of Genes Involved in G1 Cell Cycle Arrest	E2F1;E2F1	GPI anchor extension	COAD_READ.
TOTAL	486	6	0.0330185	0.00144075	0.0461681	1484	0	0.0880194	1847	6	259	7	0.0197544	Transcriptional Regulation by TP53	E2F1;BRCA1;BRCA1;MBD3;E2F1	GPI anchor extension	COAD_READ.
TOTAL	89	3	0.00604661	0.001592	0.0461681	119	0	0.00953107	200	3	17	3	0.00129662	TP53 Regulates Transcription of DNA Repair Genes	BRCA1;BRCA1	GPI anchor extension	COAD_READ.
TOTAL	25	2	0.00169848	0.00194719	0.0467327	103	0	0.00595692	125	2	12	5	0.000915262	Transcription of E2F targets under negative control by DREAM complex	E2F1;E2F1	GPI anchor extension	COAD_READ.
TOTAL	38	2	0.0025817	0.0044049	0.0880979	284	0	0.0143443	301	2	27	7	0.00205934	G0 and Early G1	E2F1;E2F1	GPI anchor extension	COAD_READ.
TOTAL	27	2	0.00183436	0.000396935	0.0130989	176	0	0.00957873	201	2	22	2	0.00167798	FOXO-mediated transcription of cell cycle genes	KLF4;KLF4	Type 1 and 2 LacNAc	COAD_READ.
TOTAL	3	1	0.000203818	0.00325611	0.0520978	0	0	0.000142966	3	1	1	1	7.62718e-05	TCF7L2 mutants don't bind CTBP	TCF7L2	Type 1 and 2 LacNAc	COAD_READ.
TOTAL	110	2	0.00747333	0.00625124	0.05453	494	0	0.0277831	583	2	85	2	0.00648311	FOXO-mediated transcription	KLF4;KLF4	Type 1 and 2 LacNAc	COAD_READ.
TOTAL	10	1	0.000679394	0.0108151	0.05453	141	0	0.00700534	147	1	5	5	0.000381359	RUNX3 regulates WNT signaling	TCF7L2	Type 1 and 2 LacNAc	COAD_READ.
TOTAL	10	1	0.000679394	0.0108151	0.05453	157	0	0.00791079	166	1	4	4	0.000305087	Binding of TCF/LEF:CTNNB1 to target gene promoters	TCF7L2	Type 1 and 2 LacNAc	COAD_READ.
TOTAL	147	2	0.00998709	0.010906	0.05453	442	0	0.0273542	574	2	63	2	0.00480513	Peptide hormone metabolism	KLF4;TCF7L2	Type 1 and 2 LacNAc	COAD_READ.
TOTAL	16	1	0.00108703	0.0172514	0.0690056	252	0	0.0127716	268	1	7	5	0.000533903	Repression of WNT target genes	TCF7L2	Type 1 and 2 LacNAc	COAD_READ.
TOTAL	26	1	0.00176642	0.0278914	0.0703967	18	0	0.00204918	43	1	8	1	0.000610175	Synthesis, secretion, and deacylation of Ghrelin	KLF4	Type 1 and 2 LacNAc	COAD_READ.
TOTAL	39	1	0.00264964	0.041562	0.0703967	59	0	0.0044796	94	1	5	1	0.000381359	RUNX1 interacts with co-factors whose precise effect on RUNX1 targets is not known	RYBP	Type 1 and 2 LacNAc	COAD_READ.
TOTAL	39	1	0.00264964	0.041562	0.0703967	135	0	0.00786313	165	1	16	1	0.00122035	Signaling by WNT in cancer	TCF7L2	Type 1 and 2 LacNAc	COAD_READ.
TOTAL	43	1	0.00292139	0.045732	0.0703967	111	0	0.00724361	152	1	7	1	0.000533903	Synthesis, secretion, and inactivation of Glucagon-like Peptide-1 (GLP-1)	TCF7L2	Type 1 and 2 LacNAc	COAD_READ.
TOTAL	44	1	0.00298933	0.0467718	0.0703967	445	0	0.022398	470	1	14	3	0.00106781	Deactivation of the beta-catenin transactivating complex	TCF7L2	Type 1 and 2 LacNAc	COAD_READ.
TOTAL	45	1	0.00305727	0.0478106	0.0703967	227	0	0.0127716	268	1	35	2	0.00266951	Transcriptional regulation of pluripotent stem cells	KLF4	Type 1 and 2 LacNAc	COAD_READ.
TOTAL	46	1	0.00312521	0.0488483	0.0703967	323	0	0.0166317	349	1	33	1	0.00251697	Transcriptional Regulation by E2F6	RYBP	Type 1 and 2 LacNAc	COAD_READ.
TOTAL	47	1	0.00319315	0.0498849	0.0703967	122	0	0.00795844	167	1	14	1	0.00106781	Incretin synthesis, secretion, and inactivation	TCF7L2	Type 1 and 2 LacNAc	COAD_READ.
TOTAL	48	1	0.00326109	0.0509205	0.0703967	394	0	0.0206348	433	1	13	2	0.000991534	Transcriptional Regulation by VENTX	TCF7L2	Type 1 and 2 LacNAc	COAD_READ.
TOTAL	67	1	0.00455194	0.0703967	0.0703967	590	0	0.0302135	634	1	13	13	0.000991534	Formation of the beta-catenin:TCF transactivating complex	TCF7L2	Type 1 and 2 LacNAc	COAD_READ.
TOTAL	1554	4	0.105578	0.0804051	0.0804051	3712	0	0.22927	4811	4	824	11	0.062848	Generic Transcription Pathway	RYBP;KLF4;TCF7L2;KLF4	Type 1 and 2 LacNAc	COAD_READ.
TOTAL	81	1	0.00550309	0.0845071	0.0845071	146	0	0.0106271	223	1	27	3	0.00205934	Ca2+ pathway	TCF7L2	Type 1 and 2 LacNAc	COAD_READ.
TOTAL	91	1	0.00618249	0.0944627	0.0944627	574	0	0.030976	650	1	23	5	0.00175425	Degradation of beta-catenin by the destruction complex	TCF7L2	Type 1 and 2 LacNAc	COAD_READ.
TOTAL	17	2	0.00115497	8.73658e-05	0.00262097	38	0	0.00252573	53	2	20	13	0.00152544	RUNX1 and FOXP3 control the development of regulatory T lymphocytes (Tregs)	FOXP3;FOXP3	sialylation	COAD_READ.
TOTAL	9	1	0.000611455	0.00731283	0.0515581	63	0	0.00338353	71	1	4	2	0.000305087	RUNX1 regulates transcription of genes involved in WNT signaling	FOXP3	sialylation	COAD_READ.
TOTAL	191	2	0.0129764	0.0101931	0.0515581	200	0	0.018109	380	2	22	2	0.00167798	Interferon alpha/beta signaling	IRF4;IRF4	sialylation	COAD_READ.
TOTAL	216	2	0.0146749	0.0128895	0.0515581	143	0	0.0165364	347	2	47	1	0.00358478	Interleukin-4 and Interleukin-13 signaling	IRF4;IRF4	sialylation	COAD_READ.
TOTAL	255	2	0.0173245	0.0176503	0.0515581	172	0	0.019777	415	2	16	2	0.00122035	Interferon gamma signaling	IRF4;IRF4	sialylation	COAD_READ.
TOTAL	261	2	0.0177322	0.0184406	0.0515581	830	0	0.0498952	1047	2	132	15	0.0100679	Transcriptional regulation by RUNX1	FOXP3;FOXP3	sialylation	COAD_READ.
TOTAL	23	1	0.00156261	0.018591	0.0515581	60	0	0.00390774	82	1	6	1	0.000457631	RHO GTPases activate CIT	MYH11	sialylation	COAD_READ.
TOTAL	26	1	0.00176642	0.0209924	0.0515581	38	0	0.00300229	63	1	7	2	0.000533903	RHO GTPases Activate ROCKs	MYH11	sialylation	COAD_READ.
TOTAL	26	1	0.00176642	0.0209924	0.0515581	33	0	0.00271636	57	1	7	1	0.000533903	Sema4D induced cell migration and growth-cone collapse	MYH11	sialylation	COAD_READ.
TOTAL	27	1	0.00183436	0.0217916	0.0515581	71	0	0.00443195	93	1	15	3	0.00114408	RHO GTPases activate PAKs	MYH11	sialylation	COAD_READ.
TOTAL	32	1	0.00217406	0.025779	0.0515581	33	0	0.00300229	63	1	13	1	0.000991534	Sema4D in semaphorin signaling	MYH11	sialylation	COAD_READ.
TOTAL	33	1	0.002242	0.0265747	0.0531494	34	0	0.0030976	65	1	4	1	0.000305087	EPHA-mediated growth cone collapse	MYH11	sialylation	COAD_READ.
TOTAL	401	2	0.0272437	0.0408617	0.063307	602	0	0.0458921	963	2	69	4	0.00526276	Interferon Signaling	IRF4;IRF4	sialylation	COAD_READ.
TOTAL	55	1	0.00373667	0.0439298	0.063307	94	0	0.00700534	147	1	11	4	0.00083899	Smooth Muscle Contraction	MYH11	sialylation	COAD_READ.
TOTAL	72	1	0.00489164	0.0571459	0.063307	146	0	0.00972169	204	1	41	1	0.00312715	Semaphorin interactions	MYH11	sialylation	COAD_READ.
TOTAL	80	1	0.00543515	0.063307	0.063307	198	0	0.0130099	273	1	20	1	0.00152544	RHO GTPases activate PKNs	MYH11	sialylation	COAD_READ.
TOTAL	101	1	0.00686188	0.0793049	0.0793049	670	0	0.0356462	748	1	56	1	0.00427122	EPH-Ephrin signaling	MYH11	sialylation	COAD_READ.
TOTAL	647	2	0.0439568	0.0952106	0.0952106	1886	0	0.111275	2335	2	493	1	0.037602	Signaling by Interleukins	IRF4;IRF4	sialylation	COAD_READ.
TOTAL	4	2	0.000271758	1.25899e-05	0.000226618	0	0	0.000190621	4	2	2	2	0.000152544	RUNX3 regulates RUNX1-mediated transcription	RUNX1	sulfotransferases	COAD_READ.
TOTAL	147	4	0.00998709	3.41985e-05	0.000423144	485	0	0.0289268	607	4	84	81	0.00640683	Transcriptional regulation by RUNX2	RUNX1;RUNX2;RUNX2	sulfotransferases	COAD_READ.
TOTAL	7	2	0.000475576	3.84676e-05	0.000423144	36	0	0.00200152	42	2	4	4	0.000305087	RUNX2 regulates chondrocyte maturation	RUNX2	sulfotransferases	COAD_READ.
TOTAL	14	2	0.000951152	0.000153044	0.00129905	5	0	0.000905452	19	2	7	7	0.000533903	RUNX2 regulates genes involved in cell migration	RUNX2	sulfotransferases	COAD_READ.
TOTAL	83	3	0.00563897	0.000162381	0.00129905	156	0	0.0112467	236	3	32	32	0.0024407	Regulation of RUNX2 expression and activity	RUNX2;RUNX2	sulfotransferases	COAD_READ.
TOTAL	18	2	0.00122291	0.000252213	0.00176549	138	0	0.00710065	149	2	9	1	0.000686446	YAP1- and WWTR1 (TAZ)-stimulated gene expression	RUNX2	sulfotransferases	COAD_READ.
TOTAL	261	4	0.0177322	0.000309569	0.00185741	830	0	0.0498952	1047	4	132	123	0.0100679	Transcriptional regulation by RUNX1	RUNX1;RUNX2;RUNX1	sulfotransferases	COAD_READ.
TOTAL	118	3	0.00801685	0.000453478	0.00226739	378	0	0.022398	470	3	47	4	0.00358478	Transcriptional regulation by RUNX3	RUNX1;RUNX1	sulfotransferases	COAD_READ.
TOTAL	32	2	0.00217406	0.000788581	0.00355547	137	0	0.00781548	164	2	19	18	0.00144916	Regulation of RUNX1 Expression and Activity	RUNX1;RUNX1	sulfotransferases	COAD_READ.
TOTAL	34	2	0.00230994	0.000888867	0.00355547	210	0	0.0115326	242	2	24	21	0.00183052	RUNX2 regulates osteoblast differentiation	RUNX2	sulfotransferases	COAD_READ.
TOTAL	43	2	0.00292139	0.00141192	0.0056477	246	0	0.0134388	282	2	32	29	0.0024407	RUNX2 regulates bone development	RUNX2	sulfotransferases	COAD_READ.
TOTAL	7	1	0.000475576	0.00899737	0.0256597	5	0	0.000571864	12	1	5	5	0.000381359	RUNX1 regulates transcription of genes involved in interleukin signaling	RUNX1	sulfotransferases	COAD_READ.
TOTAL	7	1	0.000475576	0.00899737	0.0256597	74	0	0.00381243	80	1	4	4	0.000305087	RUNX1 regulates transcription of genes involved in BCR signaling	RUNX1	sulfotransferases	COAD_READ.
TOTAL	8	1	0.000543515	0.0102764	0.0256597	50	0	0.00276401	58	1	6	6	0.000457631	RUNX1 regulates expression of components of tight junctions	RUNX1	sulfotransferases	COAD_READ.
TOTAL	1554	6	0.105578	0.0111389	0.0256597	3712	0	0.22927	4811	6	824	207	0.062848	Generic Transcription Pathway	RUNX1;RUNX2;RUNX1;RUNX2	sulfotransferases	COAD_READ.
TOTAL	9	1	0.000611455	0.0115539	0.0256597	63	0	0.00338353	71	1	4	4	0.000305087	RUNX1 regulates transcription of genes involved in WNT signaling	RUNX1	sulfotransferases	COAD_READ.
TOTAL	10	1	0.000679394	0.0128299	0.0256597	95	0	0.0049085	103	1	8	7	0.000610175	RUNX1 regulates estrogen receptor mediated transcription	RUNX1	sulfotransferases	COAD_READ.
TOTAL	11	1	0.000747333	0.0141042	0.0282085	22	0	0.00157263	33	1	8	6	0.000610175	RUNX1 regulates transcription of genes involved in differentiation of keratinocytes	RUNX1	sulfotransferases	COAD_READ.
TOTAL	1693	6	0.115021	0.0166424	0.0332849	3857	0	0.239802	5032	6	885	207	0.0675006	RNA Polymerase II Transcription	RUNX1;RUNX2;RUNX1;RUNX2	sulfotransferases	COAD_READ.
TOTAL	16	1	0.00108703	0.0204528	0.0405088	98	0	0.0053374	112	1	8	2	0.000610175	RUNX3 regulates p14-ARF	RUNX1	sulfotransferases	COAD_READ.
TOTAL	17	1	0.00115497	0.0217178	0.0405088	38	0	0.00252573	53	1	20	20	0.00152544	RUNX1 and FOXP3 control the development of regulatory T lymphocytes (Tregs)	RUNX1	sulfotransferases	COAD_READ.
TOTAL	1851	6	0.125756	0.0249957	0.0405088	4048	0	0.253241	5314	6	996	207	0.0759667	Gene expression (Transcription)	RUNX1;RUNX2;RUNX1;RUNX2	sulfotransferases	COAD_READ.
TOTAL	23	1	0.00156261	0.0292757	0.0405088	60	0	0.00390774	82	1	6	1	0.000457631	RHO GTPases activate CIT	MYH11	sulfotransferases	COAD_READ.
TOTAL	26	1	0.00176642	0.0330338	0.0405088	38	0	0.00300229	63	1	7	2	0.000533903	RHO GTPases Activate ROCKs	MYH11	sulfotransferases	COAD_READ.
TOTAL	26	1	0.00176642	0.0330338	0.0405088	33	0	0.00271636	57	1	7	1	0.000533903	Sema4D induced cell migration and growth-cone collapse	MYH11	sulfotransferases	COAD_READ.
TOTAL	27	1	0.00183436	0.0342835	0.0405088	71	0	0.00443195	93	1	15	3	0.00114408	RHO GTPases activate PAKs	MYH11	sulfotransferases	COAD_READ.
TOTAL	32	1	0.00217406	0.0405088	0.0405088	33	0	0.00300229	63	1	13	1	0.000991534	Sema4D in semaphorin signaling	MYH11	sulfotransferases	COAD_READ.
TOTAL	33	1	0.002242	0.0417493	0.0417493	34	0	0.0030976	65	1	4	1	0.000305087	EPHA-mediated growth cone collapse	MYH11	sulfotransferases	COAD_READ.
TOTAL	39	1	0.00264964	0.0491604	0.0491604	59	0	0.0044796	94	1	5	5	0.000381359	RUNX1 interacts with co-factors whose precise effect on RUNX1 targets is not known	RUNX1	sulfotransferases	COAD_READ.
TOTAL	39	1	0.00264964	0.0491604	0.0491604	11	0	0.00238277	50	1	9	1	0.000686446	Organic cation transport	RUNX1	sulfotransferases	COAD_READ.
TOTAL	51	1	0.00346491	0.0638201	0.0638201	12	0	0.00300229	63	1	12	1	0.000915262	Organic cation/anion/zwitterion transport	RUNX1	sulfotransferases	COAD_READ.
TOTAL	55	1	0.00373667	0.0686589	0.0686589	94	0	0.00700534	147	1	11	4	0.00083899	Smooth Muscle Contraction	MYH11	sulfotransferases	COAD_READ.
TOTAL	71	1	0.0048237	0.0877781	0.0877781	333	0	0.0186809	392	1	27	3	0.00205934	Transcriptional regulation of granulopoiesis	RUNX1	sulfotransferases	COAD_READ.
TOTAL	72	1	0.00489164	0.0889606	0.0889606	146	0	0.00972169	204	1	41	1	0.00312715	Semaphorin interactions	MYH11	sulfotransferases	COAD_READ.
TOTAL	78	1	0.00529927	0.0960253	0.0960253	307	0	0.0179184	376	1	33	33	0.00251697	RUNX1 regulates genes involved in megakaryocyte differentiation and platelet function	RUNX1	sulfotransferases	COAD_READ.
TOTAL	80	1	0.00543515	0.0983686	0.0983686	198	0	0.0130099	273	1	20	1	0.00152544	RHO GTPases activate PKNs	MYH11	sulfotransferases	COAD_READ.
TOTAL	20	2	0.00135879	0.000499533	0.0324696	94	0	0.00505147	106	2	17	6	0.00129662	TP53 Regulates Transcription of Genes Involved in G1 Cell Cycle Arrest	E2F7;E2F7	Dolichol Pathway	GBM.
TOTAL	40	2	0.00271758	0.00195879	0.0626813	3	0	0.00204918	43	2	2	1	0.000152544	Association of TriC/CCT with target proteins during biosynthesis	XRN2;HDAC3	Dolichol Pathway	GBM.
TOTAL	20	1	0.00135879	0.0148455	0.0890732	94	0	0.00505147	106	1	17	4	0.00129662	TP53 Regulates Transcription of Genes Involved in G1 Cell Cycle Arrest	E2F8	Complex N-glycans	GBM.
TOTAL	108	4	0.00733745	0.000126537	0.0092372	414	0	0.0236847	497	4	18	8	0.00137289	Transcriptional regulation of white adipocyte differentiation	CEBPD;CEBPA;CEBPA;CEBPD	N-glycan branching	GBM.
TOTAL	71	3	0.0048237	0.000654443	0.0235599	333	0	0.0186809	392	3	27	18	0.00205934	Transcriptional regulation of granulopoiesis	CEBPA;CEBPA	N-glycan branching	GBM.
TOTAL	9	1	0.000611455	0.00973854	0.05814	11	0	0.000953107	20	1	3	1	0.000228815	RUNX3 regulates YAP1-mediated transcription	WWTR1	GalNAc-type O-glycans	GBM.
TOTAL	10	1	0.000679394	0.0108151	0.05814	17	0	0.00128669	27	1	8	1	0.000610175	Displacement of DNA glycosylase by APEX1	MBD4	GalNAc-type O-glycans	GBM.
TOTAL	13	1	0.000883212	0.0140382	0.05814	8	0	0.00100076	21	1	4	1	0.000305087	Physiological factors	WWTR1	GalNAc-type O-glycans	GBM.
TOTAL	18	1	0.00122291	0.0193881	0.05814	138	0	0.00710065	149	1	9	5	0.000686446	YAP1- and WWTR1 (TAZ)-stimulated gene expression	WWTR1	GalNAc-type O-glycans	GBM.
TOTAL	22	1	0.00149467	0.0236484	0.05814	201	0	0.0100553	211	1	30	8	0.00228815	Signaling by Hippo	WWTR1	GalNAc-type O-glycans	GBM.
TOTAL	23	1	0.00156261	0.0247108	0.05814	5	0	0.00133435	28	1	2	1	0.000152544	RNA Polymerase III Transcription Termination	NFIC	GalNAc-type O-glycans	GBM.
TOTAL	34	1	0.00230994	0.0363256	0.05814	210	0	0.0115326	242	1	24	3	0.00183052	RUNX2 regulates osteoblast differentiation	WWTR1	GalNAc-type O-glycans	GBM.
TOTAL	39	1	0.00264964	0.041562	0.05814	353	0	0.0182043	382	1	17	4	0.00129662	SMAD2/SMAD3:SMAD4 heterotrimer regulates transcription	WWTR1	GalNAc-type O-glycans	GBM.
TOTAL	39	1	0.00264964	0.041562	0.05814	168	0	0.00972169	204	1	26	2	0.00198307	EGR2 and SOX10-mediated initiation of Schwann cell myelination	WWTR1	GalNAc-type O-glycans	GBM.
TOTAL	42	1	0.00285345	0.0446911	0.05814	20	0	0.00295463	62	1	21	2	0.00160171	Recognition and association of DNA glycosylase with site containing an affected pyrimidine	MBD4	GalNAc-type O-glycans	GBM.
TOTAL	43	1	0.00292139	0.045732	0.05814	246	0	0.0134388	282	1	32	3	0.0024407	RUNX2 regulates bone development	WWTR1	GalNAc-type O-glycans	GBM.
TOTAL	46	1	0.00312521	0.0488483	0.05814	5	0	0.00243042	51	1	13	1	0.000991534	RNA Polymerase III Abortive And Retractive Initiation	NFIC	GalNAc-type O-glycans	GBM.
TOTAL	46	1	0.00312521	0.0488483	0.05814	28	0	0.0035265	74	1	25	1	0.0019068	RNA Polymerase III Transcription	NFIC	GalNAc-type O-glycans	GBM.
TOTAL	48	1	0.00326109	0.0509205	0.05814	72	0	0.00562333	118	1	43	1	0.00327969	Resolution of Abasic Sites (AP sites)	MBD4	GalNAc-type O-glycans	GBM.
TOTAL	51	1	0.00346491	0.0540209	0.05814	0	0	0.00243042	51	1	20	2	0.00152544	Cleavage of the damaged pyrimidine	MBD4	GalNAc-type O-glycans	GBM.
TOTAL	51	1	0.00346491	0.0540209	0.05814	20	0	0.00338353	71	1	41	4	0.00312715	Depyrimidination	MBD4	GalNAc-type O-glycans	GBM.
TOTAL	55	1	0.00373667	0.05814	0.05814	523	0	0.026544	557	1	38	4	0.00289833	Transcriptional activity of SMAD2/SMAD3:SMAD4 heterotrimer	WWTR1	GalNAc-type O-glycans	GBM.
TOTAL	62	1	0.00421224	0.065308	0.065308	22	0	0.00400305	84	1	62	4	0.00472885	Base-Excision Repair, AP Site Formation	MBD4	GalNAc-type O-glycans	GBM.
TOTAL	85	1	0.00577485	0.0885016	0.0885016	683	0	0.0352173	739	1	82	4	0.00625429	Signaling by TGF-beta Receptor Complex	WWTR1	GalNAc-type O-glycans	GBM.
TOTAL	23	2	0.00156261	0.000133042	0.00177096	153	0	0.00824438	173	2	15	2	0.00114408	FOXO-mediated transcription of cell death genes	BCL6;BCL6	CS HS Initiation	GBM.
TOTAL	28	2	0.0019023	0.000196773	0.00177096	98	0	0.0057663	121	2	19	2	0.00144916	TP53 regulates transcription of several additional cell death genes whose specific roles in p53-dependent apoptosis remain uncertain	BCL6;BCL6	CS HS Initiation	GBM.
TOTAL	83	2	0.00563897	0.00169071	0.0101442	280	0	0.0163934	344	2	68	2	0.00518648	TP53 Regulates Transcription of Cell Death Genes	BCL6;BCL6	CS HS Initiation	GBM.
TOTAL	110	2	0.00747333	0.0029371	0.0117484	494	0	0.0277831	583	2	85	2	0.00648311	FOXO-mediated transcription	BCL6;BCL6	CS HS Initiation	GBM.
TOTAL	216	2	0.0146749	0.0108462	0.0325386	143	0	0.0165364	347	2	47	1	0.00358478	Interleukin-4 and Interleukin-13 signaling	BCL6;BCL6	CS HS Initiation	GBM.
TOTAL	31	1	0.00210612	0.0229249	0.061888	14	0	0.00214449	45	1	15	1	0.00114408	PIWI-interacting RNA (piRNA) biogenesis	MYBL1	CS HS Initiation	GBM.
TOTAL	42	1	0.00285345	0.030944	0.061888	144	0	0.00814907	171	1	19	4	0.00144916	Oncogene Induced Senescence	ERF	CS HS Initiation	GBM.
TOTAL	486	2	0.0330185	0.0491902	0.0840444	1484	0	0.0880194	1847	2	259	2	0.0197544	Transcriptional Regulation by TP53	BCL6;BCL6	CS HS Initiation	GBM.
TOTAL	647	2	0.0439568	0.0816518	0.0840444	1886	0	0.111275	2335	2	493	1	0.037602	Signaling by Interleukins	BCL6;BCL6	CS HS Initiation	GBM.
TOTAL	117	1	0.00794891	0.0840444	0.0840444	36	0	0.00710065	149	1	36	1	0.00274579	Gene Silencing by RNA	MYBL1	CS HS Initiation	GBM.
TOTAL	21	2	0.00142673	0.000597462	0.0516682	130	0	0.00700534	147	2	16	2	0.00122035	POU5F1 (OCT4), SOX2, NANOG activate genes related to proliferation	STAT3;STAT3	CS-DS extension	GBM.
TOTAL	23	2	0.00156261	0.000715195	0.0516682	153	0	0.00824438	173	2	15	2	0.00114408	FOXO-mediated transcription of cell death genes	BCL6;BCL6	CS-DS extension	GBM.
TOTAL	28	2	0.0019023	0.00105445	0.0516682	98	0	0.0057663	121	2	19	2	0.00144916	TP53 regulates transcription of several additional cell death genes whose specific roles in p53-dependent apoptosis remain uncertain	BCL6;BCL6	CS-DS extension	GBM.
TOTAL	45	2	0.00305727	0.00267588	0.0990077	227	0	0.0127716	268	2	35	4	0.00266951	Transcriptional regulation of pluripotent stem cells	STAT3;STAT3	CS-DS extension	GBM.
TOTAL	104	5	0.0070657	7.27823e-06	0.00112813	437	0	0.0246378	517	5	59	14	0.00450004	Circadian Clock	PPARA;MEF2C;RXRA;NCOR1;PPARA	HS extension	GBM.
TOTAL	87	4	0.00591073	7.67277e-05	0.00590803	193	0	0.0127716	268	4	32	2	0.0024407	Transcriptional activation of mitochondrial biogenesis	MEF2C;RXRA;NCOR1;PPARA	HS extension	GBM.
TOTAL	42	3	0.00285345	0.000181871	0.00927544	114	0	0.00724361	152	3	20	2	0.00152544	BMAL1:CLOCK,NPAS2 activates circadian gene expression	PPARA;RXRA;PPARA	HS extension	GBM.
TOTAL	10	2	0.000679394	0.000319244	0.0100329	45	0	0.00252573	53	2	8	2	0.000610175	MECP2 regulates transcription factors	MEF2C;MEF2C	HS extension	GBM.
TOTAL	127	4	0.0086283	0.000323643	0.0100329	324	0	0.0206348	433	4	36	2	0.00274579	Mitochondrial biogenesis	MEF2C;RXRA;NCOR1;PPARA	HS extension	GBM.
TOTAL	15	2	0.00101909	0.000712478	0.0178119	23	0	0.00166794	35	2	6	6	0.000457631	NR1H2 & NR1H3 regulate gene expression to control bile acid homeostasis	RXRA;NCOR1	HS extension	GBM.
TOTAL	174	4	0.0118215	0.00104584	0.020724	363	0	0.0250191	525	4	41	41	0.00312715	PPARA activates gene expression	PPARA;RXRA;NCOR1;PPARA	HS extension	GBM.
TOTAL	176	4	0.0119573	0.00109074	0.020724	393	0	0.0262581	551	4	44	44	0.00335596	Regulation of lipid metabolism by PPARalpha	PPARA;RXRA;NCOR1;PPARA	HS extension	GBM.
TOTAL	86	3	0.00584279	0.00144404	0.0245487	27	0	0.00509912	107	3	2	2	0.000152544	Nuclear Receptor transcription pathway	RXRA;NCOR1;PPARA	HS extension	GBM.
TOTAL	25	2	0.00169848	0.00194719	0.0292079	56	0	0.00386008	81	2	4	1	0.000305087	RORA activates gene expression	RXRA;PPARA	HS extension	GBM.
TOTAL	100	3	0.00679394	0.00221467	0.0310054	359	0	0.0214449	450	3	77	3	0.00587293	Transcriptional Regulation by MECP2	MEF2C;MEF2C;NCOR1	HS extension	GBM.
TOTAL	108	3	0.00733745	0.0027506	0.0330072	414	0	0.0236847	497	3	18	13	0.00137289	Transcriptional regulation of white adipocyte differentiation	RXRA;NCOR1;PPARA	HS extension	GBM.
TOTAL	40	2	0.00271758	0.00486498	0.0535147	548	0	0.0274018	575	2	25	2	0.0019068	SUMOylation of intracellular receptors	RXRA;PPARA	HS extension	GBM.
TOTAL	46	2	0.00312521	0.00099814	0.0289461	323	0	0.0166317	349	2	33	31	0.00251697	Transcriptional Regulation by E2F6	E2F6;RNF2	GPI anchor extension	GBM.
TOTAL	21	2	0.00142673	0.000419815	0.0323257	130	0	0.00700534	147	2	16	2	0.00122035	POU5F1 (OCT4), SOX2, NANOG activate genes related to proliferation	STAT3;STAT3	sulfotransferases	GBM.
TOTAL	45	2	0.00305727	0.00188839	0.0717587	227	0	0.0127716	268	2	35	4	0.00266951	Transcriptional regulation of pluripotent stem cells	STAT3;STAT3	sulfotransferases	GBM.
TOTAL	71	2	0.0048237	0.00459725	0.0956968	333	0	0.0186809	392	2	27	6	0.00205934	Transcriptional regulation of granulopoiesis	STAT3;FLI1	sulfotransferases	GBM.
TOTAL	5	1	0.000339697	0.00710946	0.0956968	83	0	0.00414602	87	1	4	4	0.000305087	MET activates STAT3	STAT3	sulfotransferases	GBM.
TOTAL	5	1	0.000339697	0.00710946	0.0956968	83	0	0.00414602	87	1	1	1	7.62718e-05	Signalling to STAT3	STAT3	sulfotransferases	GBM.
TOTAL	7	1	0.000475576	0.00993974	0.0956968	124	0	0.00614754	129	1	9	6	0.000686446	PTK6 Activates STAT3	STAT3	sulfotransferases	GBM.
TOTAL	11	1	0.000747333	0.0155773	0.0956968	136	0	0.00676706	142	1	12	6	0.000915262	Interleukin-23 signaling	STAT3	sulfotransferases	GBM.
TOTAL	11	1	0.000747333	0.0155773	0.0956968	60	0	0.00300229	63	1	4	1	0.000305087	BH3-only proteins associate with and inactivate anti-apoptotic BCL-2 members	STAT3	sulfotransferases	GBM.
TOTAL	12	1	0.000815273	0.0169819	0.0956968	1	0	0.00061952	13	1	5	2	0.000381359	Interleukin-21 signaling	STAT3	sulfotransferases	GBM.
TOTAL	13	1	0.000883212	0.0183846	0.0956968	125	0	0.00652878	137	1	19	5	0.00144916	Signaling by Leptin	STAT3	sulfotransferases	GBM.
TOTAL	13	1	0.000883212	0.0183846	0.0956968	192	0	0.00953107	200	1	20	5	0.00152544	Interleukin-27 signaling	STAT3	sulfotransferases	GBM.
TOTAL	16	1	0.00108703	0.0225812	0.0956968	129	0	0.00676706	142	1	13	5	0.000991534	Interleukin-9 signaling	STAT3	sulfotransferases	GBM.
TOTAL	16	1	0.00108703	0.0225812	0.0956968	122	0	0.00633816	133	1	3	1	0.000228815	SUMOylation of DNA methylation proteins	PCGF2	sulfotransferases	GBM.
TOTAL	16	1	0.00108703	0.0225812	0.0956968	335	0	0.0162028	340	1	17	5	0.00129662	Interleukin-15 signaling	STAT3	sulfotransferases	GBM.
TOTAL	16	1	0.00108703	0.0225812	0.0956968	174	0	0.00876859	184	1	26	3	0.00198307	Interleukin-35 Signalling	STAT3	sulfotransferases	GBM.
TOTAL	18	1	0.00122291	0.0253695	0.0956968	109	0	0.00586161	123	1	20	6	0.00152544	Interleukin-6 signaling	STAT3	sulfotransferases	GBM.
TOTAL	19	1	0.00129085	0.0267607	0.0956968	119	0	0.00648113	136	1	7	1	0.000533903	Signaling by PDGFRA extracellular domain mutants	STAT3	sulfotransferases	GBM.
TOTAL	19	1	0.00129085	0.0267607	0.0956968	119	0	0.00648113	136	1	7	1	0.000533903	Signaling by PDGFRA transmembrane, juxtamembrane and kinase domain mutants	STAT3	sulfotransferases	GBM.
TOTAL	26	1	0.00176642	0.0364469	0.0956968	163	0	0.0088639	186	1	14	1	0.00106781	Signaling by cytosolic FGFR1 fusion mutants	STAT3	sulfotransferases	GBM.
TOTAL	28	1	0.0019023	0.0391975	0.0956968	127	0	0.00724361	152	1	11	4	0.00083899	Signaling by phosphorylated juxtamembrane, extracellular and kinase domain KIT mutants	STAT3	sulfotransferases	GBM.
TOTAL	29	1	0.00197024	0.04057	0.0956968	183	0	0.00962638	202	1	56	26	0.00427122	Interleukin-20 family signaling	STAT3	sulfotransferases	GBM.
TOTAL	29	1	0.00197024	0.04057	0.0956968	105	0	0.00609989	128	1	28	2	0.00213561	Growth hormone receptor signaling	STAT3	sulfotransferases	GBM.
TOTAL	31	1	0.00210612	0.0433093	0.0956968	135	0	0.00748189	157	1	34	6	0.00259324	Interleukin-6 family signaling	STAT3	sulfotransferases	GBM.
TOTAL	36	1	0.00244582	0.0501252	0.0956968	148	0	0.00848265	178	1	26	3	0.00198307	Interleukin-7 signaling	STAT3	sulfotransferases	GBM.
TOTAL	36	1	0.00244582	0.0501252	0.0956968	180	0	0.0101029	212	1	14	1	0.00106781	Interleukin-37 signaling	STAT3	sulfotransferases	GBM.
TOTAL	37	1	0.00251376	0.0514828	0.0956968	288	0	0.0148208	311	1	16	1	0.00122035	Downstream signal transduction	STAT3	sulfotransferases	GBM.
TOTAL	40	1	0.00271758	0.0555446	0.0956968	3	0	0.00204918	43	1	2	1	0.000152544	Association of TriC/CCT with target proteins during biosynthesis	STAT3	sulfotransferases	GBM.
TOTAL	42	1	0.00285345	0.0582432	0.0956968	128	0	0.0080061	168	1	24	2	0.00183052	Signaling by PDGFR in disease	STAT3	sulfotransferases	GBM.
TOTAL	43	1	0.00292139	0.0595898	0.0956968	127	0	0.00795844	167	1	26	4	0.00198307	Signaling by KIT in disease	STAT3	sulfotransferases	GBM.
TOTAL	44	1	0.00298933	0.0609345	0.0956968	423	0	0.0212543	446	1	27	3	0.00205934	SUMOylation of transcription cofactors	PCGF2	sulfotransferases	GBM.
TOTAL	46	1	0.00312521	0.0636184	0.0956968	323	0	0.0166317	349	1	33	1	0.00251697	Transcriptional Regulation by E2F6	PCGF2	sulfotransferases	GBM.
TOTAL	48	1	0.00326109	0.0662951	0.0956968	166	0	0.0100076	210	1	25	1	0.0019068	FGFR1 mutant receptor activation	STAT3	sulfotransferases	GBM.
TOTAL	51	1	0.00346491	0.0702964	0.0956968	177	0	0.0105795	222	1	4	1	0.000305087	SUMOylation of RNA binding proteins	PCGF2	sulfotransferases	GBM.
TOTAL	52	1	0.00353285	0.0716265	0.0956968	405	0	0.0205395	431	1	59	12	0.00450004	Interleukin-2 family signaling	STAT3	sulfotransferases	GBM.
TOTAL	58	1	0.00394049	0.0795694	0.0956968	221	0	0.0129146	271	1	35	1	0.00266951	Signaling by FGFR1 in disease	STAT3	sulfotransferases	GBM.
TOTAL	61	1	0.0041443	0.0835165	0.0956968	262	0	0.0138201	290	1	62	1	0.00472885	Intrinsic Pathway for Apoptosis	STAT3	sulfotransferases	GBM.
TOTAL	62	1	0.00421224	0.0848286	0.0956968	524	0	0.0273065	573	1	15	2	0.00114408	SUMOylation of chromatin organization proteins	PCGF2	sulfotransferases	GBM.
TOTAL	66	1	0.004484	0.0900592	0.0956968	260	0	0.0147255	309	1	39	4	0.0029746	Signaling by SCF-KIT	STAT3	sulfotransferases	GBM.
TOTAL	1243	4	0.0844487	0.0956968	0.0956968	2923	0	0.182377	3827	4	538	11	0.0410342	Developmental Biology	STAT3;PCGF2;STAT3;FLI1	sulfotransferases	GBM.
TOTAL	71	1	0.0048237	0.0965574	0.0965574	692	0	0.0352173	739	1	53	6	0.00404241	Signaling by Non-Receptor Tyrosine Kinases	STAT3	sulfotransferases	GBM.
TOTAL	71	1	0.0048237	0.0965574	0.0965574	692	0	0.0352173	739	1	53	6	0.00404241	Signaling by PTK6	STAT3	sulfotransferases	GBM.
TOTAL	4	2	0.000271758	2.20635e-05	0.00105905	199	0	0.00962638	202	2	5	4	0.000381359	Regulation of TP53 Expression	PRDM1;PRDM1	Glycolipid core	HNSC
TOTAL	46	2	0.00312521	0.00279323	0.0670376	484	0	0.0247331	519	2	35	4	0.00266951	Regulation of TP53 Expression and Degradation	PRDM1;PRDM1	Glycolipid core	HNSC
TOTAL	10	2	0.000679394	5.50391e-05	0.00358137	45	0	0.00252573	53	2	8	2	0.000610175	MECP2 regulates transcription factors	MEF2C;MEF2C	Gangliosides	HNSC
TOTAL	80	3	0.00543515	8.52706e-05	0.00358137	319	0	0.0184426	387	3	48	12	0.00366105	Nuclear Events (kinase and transcription factor activation)	MEF2C;EGR2;EGR2	Gangliosides	HNSC
TOTAL	108	3	0.00733745	0.000205939	0.00576629	414	0	0.0236847	497	3	18	4	0.00137289	Transcriptional regulation of white adipocyte differentiation	EBF1;EBF1;EGR2	Gangliosides	HNSC
TOTAL	143	3	0.00971533	0.000467084	0.00980876	662	0	0.0368852	774	3	102	12	0.00777973	Signaling by NTRK1 (TRKA)	MEF2C;EGR2;EGR2	Gangliosides	HNSC
TOTAL	166	3	0.0112779	0.000719589	0.0115066	880	0	0.0478936	1005	3	164	12	0.0125086	Signaling by NTRKs	MEF2C;EGR2;EGR2	Gangliosides	HNSC
TOTAL	39	2	0.00264964	0.000821901	0.0115066	168	0	0.00972169	204	2	26	19	0.00198307	EGR2 and SOX10-mediated initiation of Schwann cell myelination	EGR2;EGR2	Gangliosides	HNSC
TOTAL	56	2	0.00380461	0.00167645	0.0201174	296	0	0.0162981	342	2	37	11	0.00282206	NGF-stimulated transcription	EGR2;EGR2	Gangliosides	HNSC
TOTAL	100	2	0.00679394	0.00519907	0.0519907	359	0	0.0214449	450	2	77	2	0.00587293	Transcriptional Regulation by MECP2	MEF2C;MEF2C	Gangliosides	HNSC
TOTAL	1243	5	0.0844487	0.00848642	0.0724248	2923	0	0.182377	3827	5	538	32	0.0410342	Developmental Biology	EBF1;MEF2C;EBF1;EGR2;EGR2	Gangliosides	HNSC
TOTAL	12	1	0.000815273	0.0129649	0.0724248	0	0	0.000571864	12	1	2	1	0.000152544	Phase 3 - rapid repolarisation	ERG	Gangliosides	HNSC
TOTAL	26	1	0.00176642	0.0278914	0.0724248	29	0	0.00257339	54	1	7	1	0.000533903	ERK/MAPK targets	MEF2C	Gangliosides	HNSC
TOTAL	629	3	0.0427339	0.0287827	0.0724248	1954	0	0.113753	2387	3	704	12	0.0536954	Signaling by Receptor Tyrosine Kinases	MEF2C;EGR2;EGR2	Gangliosides	HNSC
TOTAL	32	1	0.00217406	0.0342235	0.0724248	101	0	0.0061952	130	1	14	2	0.00106781	Myogenesis	MEF2C	Gangliosides	HNSC
TOTAL	35	1	0.00237788	0.037375	0.0724248	157	0	0.00862562	181	1	16	1	0.00122035	MAPK targets/ Nuclear events mediated by MAP kinases	MEF2C	Gangliosides	HNSC
TOTAL	44	1	0.00298933	0.0467718	0.0724248	0	0	0.00209684	44	1	1	1	7.62718e-05	Voltage gated Potassium channels	ERG	Gangliosides	HNSC
TOTAL	69	1	0.00468782	0.0724248	0.0724248	190	0	0.0113896	239	1	32	1	0.0024407	MAP kinase activation	MEF2C	Gangliosides	HNSC
TOTAL	77	1	0.00523133	0.0804961	0.0804961	190	0	0.0117709	247	1	35	1	0.00266951	Interleukin-17 signaling	MEF2C	Gangliosides	HNSC
TOTAL	87	1	0.00591073	0.0904927	0.0904927	193	0	0.0127716	268	1	32	1	0.0024407	Transcriptional activation of mitochondrial biogenesis	MEF2C	Gangliosides	HNSC
TOTAL	94	1	0.0063863	0.0974295	0.0974295	374	0	0.0204918	430	1	58	1	0.00442377	MyD88 cascade initiated on plasma membrane	MEF2C	Gangliosides	HNSC
TOTAL	94	1	0.0063863	0.0974295	0.0974295	378	0	0.0206824	434	1	59	1	0.00450004	Toll Like Receptor 5 (TLR5) Cascade	MEF2C	Gangliosides	HNSC
TOTAL	94	1	0.0063863	0.0974295	0.0974295	376	0	0.0205395	431	1	59	1	0.00450004	Toll Like Receptor 10 (TLR10) Cascade	MEF2C	Gangliosides	HNSC
TOTAL	89	5	0.00604661	3.6279e-05	0.00373674	119	0	0.00953107	200	5	17	3	0.00129662	TP53 Regulates Transcription of DNA Repair Genes	SSRP1;BRCA1;BRCA1;CDK9	Dolichol Pathway	HNSC
TOTAL	10	1	0.000679394	0.0108151	0.0944627	157	0	0.00791079	166	1	4	2	0.000305087	Binding of TCF/LEF:CTNNB1 to target gene promoters	TCF7	N-glycan branching	HNSC
TOTAL	10	1	0.000679394	0.0108151	0.0944627	141	0	0.00700534	147	1	5	1	0.000381359	RUNX3 regulates WNT signaling	TCF7	N-glycan branching	HNSC
TOTAL	16	1	0.00108703	0.0172514	0.0944627	252	0	0.0127716	268	1	7	4	0.000533903	Repression of WNT target genes	TCF7	N-glycan branching	HNSC
TOTAL	191	2	0.0129764	0.0179078	0.0944627	200	0	0.018109	380	2	22	2	0.00167798	Interferon alpha/beta signaling	IRF1;IRF1	N-glycan branching	HNSC
TOTAL	28	1	0.0019023	0.0300064	0.0944627	23	0	0.00243042	51	1	4	4	0.000305087	RNA Polymerase III Transcription Initiation From Type 3 Promoter	SNAPC1	N-glycan branching	HNSC
TOTAL	255	2	0.0173245	0.0306587	0.0944627	172	0	0.019777	415	2	16	2	0.00122035	Interferon gamma signaling	IRF1;IRF1	N-glycan branching	HNSC
TOTAL	31	1	0.00210612	0.0331708	0.0944627	14	0	0.00214449	45	1	15	1	0.00114408	PIWI-interacting RNA (piRNA) biogenesis	MYBL1	N-glycan branching	HNSC
TOTAL	36	1	0.00244582	0.0384234	0.0944627	23	0	0.00281167	59	1	13	4	0.000991534	RNA Polymerase III Transcription Initiation	SNAPC1	N-glycan branching	HNSC
TOTAL	44	1	0.00298933	0.0467718	0.0944627	445	0	0.022398	470	1	14	3	0.00106781	Deactivation of the beta-catenin transactivating complex	TCF7	N-glycan branching	HNSC
TOTAL	46	1	0.00312521	0.0488483	0.0944627	28	0	0.0035265	74	1	25	6	0.0019068	RNA Polymerase III Transcription	SNAPC1	N-glycan branching	HNSC
TOTAL	46	1	0.00312521	0.0488483	0.0944627	5	0	0.00243042	51	1	13	3	0.000991534	RNA Polymerase III Abortive And Retractive Initiation	SNAPC1	N-glycan branching	HNSC
TOTAL	401	2	0.0272437	0.0691803	0.0944627	602	0	0.0458921	963	2	69	4	0.00526276	Interferon Signaling	IRF1;IRF1	N-glycan branching	HNSC
TOTAL	67	1	0.00455194	0.0703967	0.0944627	590	0	0.0302135	634	1	13	11	0.000991534	Formation of the beta-catenin:TCF transactivating complex	TCF7	N-glycan branching	HNSC
TOTAL	81	1	0.00550309	0.0845071	0.0944627	146	0	0.0106271	223	1	27	2	0.00205934	Ca2+ pathway	TCF7	N-glycan branching	HNSC
TOTAL	91	1	0.00618249	0.0944627	0.0944627	574	0	0.030976	650	1	23	4	0.00175425	Degradation of beta-catenin by the destruction complex	TCF7	N-glycan branching	HNSC
TOTAL	94	1	0.0063863	0.0974295	0.0974295	140	0	0.0106748	224	1	11	10	0.00083899	RNA polymerase II transcribes snRNA genes	SNAPC1	N-glycan branching	HNSC
TOTAL	4	2	0.000271758	2.7785e-05	0.0020283	0	0	0.000190621	4	2	2	2	0.000152544	RUNX3 regulates RUNX1-mediated transcription	RUNX1	CS-DS extension	HNSC
TOTAL	118	4	0.00801685	7.25079e-05	0.00261029	378	0	0.022398	470	4	47	7	0.00358478	Transcriptional regulation by RUNX3	RUNX1;RUNX1;TEAD1	CS-DS extension	HNSC
TOTAL	32	2	0.00217406	0.00172066	0.0412958	137	0	0.00781548	164	2	19	18	0.00144916	Regulation of RUNX1 Expression and Activity	RUNX1;RUNX1	CS-DS extension	HNSC
TOTAL	71	2	0.0048237	0.00809219	0.0903126	333	0	0.0186809	392	2	27	3	0.00205934	Transcriptional regulation of granulopoiesis	RUNX1;FLI1	CS-DS extension	HNSC
TOTAL	6	1	0.000407636	0.0113512	0.0903126	11	0	0.000762486	16	1	2	2	0.000152544	AKT-mediated inactivation of FOXO1A	FOXO1	CS-DS extension	HNSC
TOTAL	6	1	0.000407636	0.0113512	0.0903126	18	0	0.00109607	23	1	2	1	0.000152544	RUNX2 regulates genes involved in differentiation of myeloid cells	RUNX1	CS-DS extension	HNSC
TOTAL	7	1	0.000475576	0.013231	0.0903126	74	0	0.00381243	80	1	4	4	0.000305087	RUNX1 regulates transcription of genes involved in BCR signaling	RUNX1	CS-DS extension	HNSC
TOTAL	7	1	0.000475576	0.013231	0.0903126	5	0	0.000571864	12	1	5	5	0.000381359	RUNX1 regulates transcription of genes involved in interleukin signaling	RUNX1	CS-DS extension	HNSC
TOTAL	8	1	0.000543515	0.0151073	0.0903126	50	0	0.00276401	58	1	6	6	0.000457631	RUNX1 regulates expression of components of tight junctions	RUNX1	CS-DS extension	HNSC
TOTAL	9	1	0.000611455	0.0169801	0.0903126	63	0	0.00338353	71	1	4	4	0.000305087	RUNX1 regulates transcription of genes involved in WNT signaling	RUNX1	CS-DS extension	HNSC
TOTAL	9	1	0.000611455	0.0169801	0.0903126	11	0	0.000953107	20	1	3	3	0.000228815	RUNX3 regulates YAP1-mediated transcription	TEAD1	CS-DS extension	HNSC
TOTAL	10	1	0.000679394	0.0188496	0.0903126	95	0	0.0049085	103	1	8	7	0.000610175	RUNX1 regulates estrogen receptor mediated transcription	RUNX1	CS-DS extension	HNSC
TOTAL	11	1	0.000747333	0.0207156	0.0903126	55	0	0.0030976	65	1	7	7	0.000533903	RUNX1 regulates transcription of genes involved in differentiation of myeloid cells	RUNX1	CS-DS extension	HNSC
TOTAL	11	1	0.000747333	0.0207156	0.0903126	22	0	0.00157263	33	1	8	6	0.000610175	RUNX1 regulates transcription of genes involved in differentiation of keratinocytes	RUNX1	CS-DS extension	HNSC
TOTAL	12	1	0.000815273	0.0225782	0.0903126	37	0	0.00228746	48	1	4	1	0.000305087	AKT phosphorylates targets in the nucleus	FOXO1	CS-DS extension	HNSC
TOTAL	14	1	0.000951152	0.0262931	0.0955198	34	0	0.00204918	43	1	5	3	0.000381359	Regulation of localization of FOXO transcription factors	FOXO1	CS-DS extension	HNSC
TOTAL	16	1	0.00108703	0.0299944	0.0955198	170	0	0.008435	177	1	9	3	0.000686446	Regulation of FOXO transcriptional activity by acetylation	FOXO1	CS-DS extension	HNSC
TOTAL	16	1	0.00108703	0.0299944	0.0955198	98	0	0.0053374	112	1	8	2	0.000610175	RUNX3 regulates p14-ARF	RUNX1	CS-DS extension	HNSC
TOTAL	17	1	0.00115497	0.0318399	0.0955198	38	0	0.00252573	53	1	20	20	0.00152544	RUNX1 and FOXP3 control the development of regulatory T lymphocytes (Tregs)	RUNX1	CS-DS extension	HNSC
TOTAL	10	2	0.000679394	0.00016019	0.0174607	45	0	0.00252573	53	2	8	2	0.000610175	MECP2 regulates transcription factors	MEF2C;MEF2C	sialylation	HNSC
TOTAL	80	3	0.00543515	0.000425913	0.0229993	319	0	0.0184426	387	3	48	12	0.00366105	Nuclear Events (kinase and transcription factor activation)	MEF2C;EGR2;EGR2	sialylation	HNSC
TOTAL	108	3	0.00733745	0.00101273	0.0364581	414	0	0.0236847	497	3	18	4	0.00137289	Transcriptional regulation of white adipocyte differentiation	EBF1;EBF1;EGR2	sialylation	HNSC
TOTAL	143	3	0.00971533	0.00225273	0.049517	662	0	0.0368852	774	3	102	12	0.00777973	Signaling by NTRK1 (TRKA)	MEF2C;EGR2;EGR2	sialylation	HNSC
TOTAL	39	2	0.00264964	0.00235795	0.049517	168	0	0.00972169	204	2	26	19	0.00198307	EGR2 and SOX10-mediated initiation of Schwann cell myelination	EGR2;EGR2	sialylation	HNSC
TOTAL	166	3	0.0112779	0.00342663	0.0616793	880	0	0.0478936	1005	3	164	12	0.0125086	Signaling by NTRKs	MEF2C;EGR2;EGR2	sialylation	HNSC
TOTAL	56	2	0.00380461	0.00476934	0.0715402	296	0	0.0162981	342	2	37	11	0.00282206	NGF-stimulated transcription	EGR2;EGR2	sialylation	HNSC
TOTAL	110	4	0.00747333	2.94081e-05	0.00115752	494	0	0.0277831	583	4	85	4	0.00648311	FOXO-mediated transcription	BCL6;BCL6;KLF4;KLF4	LacdiNAc	HNSC
TOTAL	45	3	0.00305727	5.512e-05	0.00115752	227	0	0.0127716	268	3	35	28	0.00266951	Transcriptional regulation of pluripotent stem cells	SOX2;SOX2;KLF4	LacdiNAc	HNSC
TOTAL	216	4	0.0146749	0.000389573	0.00545403	143	0	0.0165364	347	4	47	1	0.00358478	Interleukin-4 and Interleukin-13 signaling	BCL6;BCL6;SOX2;SOX2	LacdiNAc	HNSC
TOTAL	23	2	0.00156261	0.000658663	0.00658663	153	0	0.00824438	173	2	15	2	0.00114408	FOXO-mediated transcription of cell death genes	BCL6;BCL6	LacdiNAc	HNSC
TOTAL	27	2	0.00183436	0.000904081	0.00679927	176	0	0.00957873	201	2	22	2	0.00167798	FOXO-mediated transcription of cell cycle genes	KLF4;KLF4	LacdiNAc	HNSC
TOTAL	28	2	0.0019023	0.000971324	0.00679927	98	0	0.0057663	121	2	19	2	0.00144916	TP53 regulates transcription of several additional cell death genes whose specific roles in p53-dependent apoptosis remain uncertain	BCL6;BCL6	LacdiNAc	HNSC
TOTAL	83	2	0.00563897	0.00808169	0.0484901	280	0	0.0163934	344	2	68	2	0.00518648	TP53 Regulates Transcription of Cell Death Genes	BCL6;BCL6	LacdiNAc	HNSC
TOTAL	10	1	0.000679394	0.0161787	0.0784099	13	0	0.00100076	21	1	7	6	0.000533903	POU5F1 (OCT4), SOX2, NANOG repress genes related to differentiation	SOX2	LacdiNAc	HNSC
TOTAL	647	4	0.0439568	0.0196025	0.0784099	1886	0	0.111275	2335	4	493	1	0.037602	Signaling by Interleukins	BCL6;BCL6;SOX2;SOX2	LacdiNAc	HNSC
TOTAL	26	2	0.00176642	0.00027996	0.00561542	100	0	0.0057663	121	2	9	1	0.000686446	NOTCH4 Intracellular Domain Regulates Transcription	HEY1;HEY1	sulfotransferases	HNSC
TOTAL	36	2	0.00244582	0.00053382	0.00561542	73	0	0.00500381	105	2	22	2	0.00167798	NOTCH3 Intracellular Domain Regulates Transcription	HEY1;HEY1	sulfotransferases	HNSC
TOTAL	44	2	0.00298933	0.000793977	0.00561542	445	0	0.022398	470	2	14	4	0.00106781	Deactivation of the beta-catenin transactivating complex	SOX9;TCF7	sulfotransferases	HNSC
TOTAL	57	2	0.00387255	0.00132308	0.00561542	247	0	0.0138677	291	2	18	2	0.00137289	NOTCH1 Intracellular Domain Regulates Transcription	HEY1;HEY1	sulfotransferases	HNSC
TOTAL	63	2	0.00428018	0.00161103	0.00561542	190	0	0.0118185	248	2	37	2	0.00282206	Signaling by NOTCH3	HEY1;HEY1	sulfotransferases	HNSC
TOTAL	68	2	0.00461988	0.00187181	0.00561542	212	0	0.0128193	269	2	21	2	0.00160171	Constitutive Signaling by NOTCH1 PEST Domain Mutants	HEY1;HEY1	sulfotransferases	HNSC
TOTAL	68	2	0.00461988	0.00187181	0.00561542	212	0	0.0128193	269	2	21	2	0.00160171	Signaling by NOTCH1 PEST Domain Mutants in Cancer	HEY1;HEY1	sulfotransferases	HNSC
TOTAL	68	2	0.00461988	0.00187181	0.00561542	212	0	0.0128193	269	2	21	2	0.00160171	Constitutive Signaling by NOTCH1 HD+PEST Domain Mutants	HEY1;HEY1	sulfotransferases	HNSC
TOTAL	68	2	0.00461988	0.00187181	0.00561542	212	0	0.0128193	269	2	21	2	0.00160171	Signaling by NOTCH1 HD+PEST Domain Mutants in Cancer	HEY1;HEY1	sulfotransferases	HNSC
TOTAL	68	2	0.00461988	0.00187181	0.00561542	212	0	0.0128193	269	2	39	2	0.0029746	Signaling by NOTCH1 in Cancer	HEY1;HEY1	sulfotransferases	HNSC
TOTAL	84	2	0.00570691	0.00283159	0.00566318	280	0	0.0165841	348	2	39	2	0.0029746	Signaling by NOTCH1	HEY1;HEY1	sulfotransferases	HNSC
TOTAL	92	2	0.00625042	0.00338191	0.00676382	183	0	0.0126763	266	2	20	1	0.00152544	Signaling by NOTCH4	HEY1;HEY1	sulfotransferases	HNSC
TOTAL	147	2	0.00998709	0.00838043	0.0167609	485	0	0.0289268	607	2	84	2	0.00640683	Transcriptional regulation by RUNX2	SOX9;HEY1	sulfotransferases	HNSC
TOTAL	10	1	0.000679394	0.00946963	0.0174304	157	0	0.00791079	166	1	4	2	0.000305087	Binding of TCF/LEF:CTNNB1 to target gene promoters	TCF7	sulfotransferases	HNSC
TOTAL	10	1	0.000679394	0.00946963	0.0174304	141	0	0.00700534	147	1	5	1	0.000381359	RUNX3 regulates WNT signaling	TCF7	sulfotransferases	HNSC
TOTAL	16	1	0.00108703	0.0151114	0.0174304	252	0	0.0127716	268	1	7	4	0.000533903	Repression of WNT target genes	TCF7	sulfotransferases	HNSC
TOTAL	216	2	0.0146749	0.0174304	0.0174304	1129	0	0.0610465	1281	2	71	15	0.0054153	TCF dependent signaling in response to WNT	SOX9;TCF7	sulfotransferases	HNSC
TOTAL	258	2	0.0175284	0.0243092	0.0243092	670	0	0.0421273	884	2	154	5	0.0117459	Signaling by NOTCH	HEY1;HEY1	sulfotransferases	HNSC
TOTAL	34	1	0.00230994	0.0318581	0.0318581	210	0	0.0115326	242	1	24	1	0.00183052	RUNX2 regulates osteoblast differentiation	HEY1	sulfotransferases	HNSC
TOTAL	332	2	0.0225559	0.038676	0.038676	1509	0	0.0837781	1758	2	157	21	0.0119747	Signaling by WNT	SOX9;TCF7	sulfotransferases	HNSC
TOTAL	43	1	0.00292139	0.0401319	0.0401319	246	0	0.0134388	282	1	32	1	0.0024407	RUNX2 regulates bone development	HEY1	sulfotransferases	HNSC
TOTAL	67	1	0.00455194	0.0618755	0.0618755	590	0	0.0302135	634	1	13	11	0.000991534	Formation of the beta-catenin:TCF transactivating complex	TCF7	sulfotransferases	HNSC
TOTAL	81	1	0.00550309	0.0743472	0.0743472	146	0	0.0106271	223	1	27	2	0.00205934	Ca2+ pathway	TCF7	sulfotransferases	HNSC
TOTAL	501	2	0.0340376	0.0804078	0.0804078	1037	0	0.0676706	1420	2	396	2	0.0302036	Diseases of signal transduction by growth factor receptors and second messengers	HEY1;HEY1	sulfotransferases	HNSC
TOTAL	91	1	0.00618249	0.0831611	0.0831611	574	0	0.030976	650	1	23	4	0.00175425	Degradation of beta-catenin by the destruction complex	TCF7	sulfotransferases	HNSC
TOTAL	49	1	0.00332903	0.0295654	0.0886962	80	0	0.00586161	123	1	22	3	0.00167798	PKMTs methylate histone lysines	DOT1L	O-mannose	KICH
TOTAL	44	2	0.00298933	0.0016381	0.0491431	423	0	0.0212543	446	2	27	3	0.00205934	SUMOylation of transcription cofactors	CTBP1;PCGF2	sulfotransferases	KICH
TOTAL	3	1	0.000203818	0.00406848	0.0610272	0	0	0.000142966	3	1	1	1	7.62718e-05	TCF7L2 mutants don't bind CTBP	CTBP1	sulfotransferases	KICH
TOTAL	29	2	0.00197024	0.000400696	0.0244425	163	0	0.0088639	186	2	20	14	0.00152544	Response of EIF2AK1 (HRI) to heme deficiency	ATF4;ATF4	P1PK blood group	KIRC
TOTAL	42	2	0.00285345	0.000834058	0.0250217	82	0	0.00557568	117	2	11	8	0.00083899	PERK regulates gene expression	ATF4;ATF4	P1PK blood group	KIRC
TOTAL	115	2	0.00781303	0.00599047	0.0859259	170	0	0.0133435	280	2	16	11	0.00122035	Response of EIF2AK4 (GCN2) to amino acid deficiency	ATF4;ATF4	P1PK blood group	KIRC
TOTAL	8	1	0.000543515	0.00812178	0.0859259	0	0	0.000381243	8	1	1	1	7.62718e-05	Loss of MECP2 binding ability to the NCoR/SMRT complex	TBL1XR1	P1PK blood group	KIRC
TOTAL	155	2	0.0105306	0.01063	0.0859259	730	0	0.0412695	866	2	94	9	0.00716955	Unfolded Protein Response (UPR)	ATF4;ATF4	P1PK blood group	KIRC
TOTAL	15	1	0.00101909	0.0151778	0.0859259	104	0	0.00543271	114	1	5	2	0.000381359	ATF6 (ATF6-alpha) activates chaperone genes	ATF4	P1PK blood group	KIRC
TOTAL	16	1	0.00108703	0.016182	0.0859259	0	0	0.000762486	16	1	5	1	0.000381359	Loss of function of MECP2 in Rett syndrome	TBL1XR1	P1PK blood group	KIRC
TOTAL	16	1	0.00108703	0.016182	0.0859259	0	0	0.000762486	16	1	5	1	0.000381359	Pervasive developmental disorders	TBL1XR1	P1PK blood group	KIRC
TOTAL	16	1	0.00108703	0.016182	0.0859259	0	0	0.000762486	16	1	5	1	0.000381359	Disorders of Developmental Biology	TBL1XR1	P1PK blood group	KIRC
TOTAL	16	1	0.00108703	0.016182	0.0859259	0	0	0.000762486	16	1	5	1	0.000381359	Disorders of Nervous System Development	TBL1XR1	P1PK blood group	KIRC
TOTAL	17	1	0.00115497	0.0171852	0.0859259	104	0	0.00552802	116	1	10	2	0.000762718	ATF6 (ATF6-alpha) activates chaperones	ATF4	P1PK blood group	KIRC
TOTAL	25	1	0.00169848	0.0251766	0.0972024	56	0	0.00386008	81	1	4	1	0.000305087	RORA activates gene expression	TBL1XR1	P1PK blood group	KIRC
TOTAL	28	1	0.0019023	0.0281577	0.0972024	140	0	0.00767251	161	1	2	1	0.000152544	Notch-HLH transcription pathway	TBL1XR1	P1PK blood group	KIRC
TOTAL	34	1	0.00230994	0.0340944	0.0972024	80	0	0.00519443	109	1	7	7	0.000533903	ATF4 activates genes in response to endoplasmic reticulum stress	ATF4	P1PK blood group	KIRC
TOTAL	39	1	0.00264964	0.0390158	0.0972024	94	0	0.00629051	132	1	14	1	0.00106781	Regulation of MECP2 expression and activity	TBL1XR1	P1PK blood group	KIRC
TOTAL	42	1	0.00285345	0.0419574	0.0972024	114	0	0.00724361	152	1	20	1	0.00152544	BMAL1:CLOCK,NPAS2 activates circadian gene expression	TBL1XR1	P1PK blood group	KIRC
TOTAL	57	1	0.00387255	0.0565397	0.0972024	247	0	0.0138677	291	1	18	1	0.00137289	NOTCH1 Intracellular Domain Regulates Transcription	TBL1XR1	P1PK blood group	KIRC
TOTAL	66	1	0.004484	0.0651893	0.0972024	248	0	0.0144872	304	1	40	2	0.00305087	NR1H3 & NR1H2 regulate gene expression linked to cholesterol transport and efflux	TBL1XR1	P1PK blood group	KIRC
TOTAL	67	1	0.00455194	0.0661458	0.0972024	1	0	0.00324056	68	1	5	1	0.000381359	HDACs deacetylate histones	TBL1XR1	P1PK blood group	KIRC
TOTAL	68	1	0.00461988	0.0671014	0.0972024	212	0	0.0128193	269	1	21	1	0.00160171	Constitutive Signaling by NOTCH1 HD+PEST Domain Mutants	TBL1XR1	P1PK blood group	KIRC
TOTAL	68	1	0.00461988	0.0671014	0.0972024	212	0	0.0128193	269	1	21	1	0.00160171	Signaling by NOTCH1 HD+PEST Domain Mutants in Cancer	TBL1XR1	P1PK blood group	KIRC
TOTAL	68	1	0.00461988	0.0671014	0.0972024	212	0	0.0128193	269	1	21	1	0.00160171	Signaling by NOTCH1 PEST Domain Mutants in Cancer	TBL1XR1	P1PK blood group	KIRC
TOTAL	68	1	0.00461988	0.0671014	0.0972024	212	0	0.0128193	269	1	21	1	0.00160171	Constitutive Signaling by NOTCH1 PEST Domain Mutants	TBL1XR1	P1PK blood group	KIRC
TOTAL	68	1	0.00461988	0.0671014	0.0972024	212	0	0.0128193	269	1	39	1	0.0029746	Signaling by NOTCH1 in Cancer	TBL1XR1	P1PK blood group	KIRC
TOTAL	70	1	0.00475576	0.0690098	0.0972024	126	0	0.00910217	191	1	42	3	0.00320342	Activation of gene expression by SREBF (SREBP)	TBL1XR1	P1PK blood group	KIRC
TOTAL	71	1	0.0048237	0.0699627	0.0972024	333	0	0.0186809	392	1	27	2	0.00205934	Transcriptional regulation of granulopoiesis	GATA2	P1PK blood group	KIRC
TOTAL	84	1	0.00570691	0.0822671	0.0972024	280	0	0.0165841	348	1	39	1	0.0029746	Signaling by NOTCH1	TBL1XR1	P1PK blood group	KIRC
TOTAL	85	1	0.00577485	0.0832072	0.0972024	332	0	0.0193957	407	1	60	2	0.00457631	NR1H2 and NR1H3-mediated signaling	TBL1XR1	P1PK blood group	KIRC
TOTAL	86	1	0.00584279	0.0841465	0.0972024	158	0	0.011342	238	1	52	3	0.00396614	Regulation of cholesterol biosynthesis by SREBP (SREBF)	TBL1XR1	P1PK blood group	KIRC
TOTAL	87	1	0.00591073	0.0850849	0.0972024	193	0	0.0127716	268	1	32	1	0.0024407	Transcriptional activation of mitochondrial biogenesis	TBL1XR1	P1PK blood group	KIRC
TOTAL	100	1	0.00679394	0.0972024	0.0972024	359	0	0.0214449	450	1	77	1	0.00587293	Transcriptional Regulation by MECP2	TBL1XR1	P1PK blood group	KIRC
TOTAL	12	2	0.000815273	0.000434336	0.0191821	1	0	0.00061952	13	2	5	2	0.000381359	Interleukin-21 signaling	STAT3;STAT5B	N-glycan branching	KIRC
TOTAL	13	2	0.000883212	0.000508936	0.0191821	125	0	0.00652878	137	2	19	10	0.00144916	Signaling by Leptin	STAT3;STAT5B	N-glycan branching	KIRC
TOTAL	16	2	0.00108703	0.000767282	0.0191821	129	0	0.00676706	142	2	13	6	0.000991534	Interleukin-9 signaling	STAT3;STAT5B	N-glycan branching	KIRC
TOTAL	16	2	0.00108703	0.000767282	0.0191821	335	0	0.0162028	340	2	17	5	0.00129662	Interleukin-15 signaling	STAT3;STAT5B	N-glycan branching	KIRC
TOTAL	21	2	0.00142673	0.00131136	0.0262271	130	0	0.00700534	147	2	16	2	0.00122035	POU5F1 (OCT4), SOX2, NANOG activate genes related to proliferation	STAT3;STAT3	N-glycan branching	KIRC
TOTAL	26	2	0.00176642	0.00199434	0.0271634	163	0	0.0088639	186	2	14	2	0.00106781	Signaling by cytosolic FGFR1 fusion mutants	STAT3;STAT5B	N-glycan branching	KIRC
TOTAL	28	2	0.0019023	0.00230567	0.0271634	127	0	0.00724361	152	2	11	4	0.00083899	Signaling by phosphorylated juxtamembrane, extracellular and kinase domain KIT mutants	STAT3;STAT5B	N-glycan branching	KIRC
TOTAL	29	2	0.00197024	0.0024694	0.0271634	183	0	0.00962638	202	2	56	26	0.00427122	Interleukin-20 family signaling	STAT3;STAT5B	N-glycan branching	KIRC
TOTAL	29	2	0.00197024	0.0024694	0.0271634	105	0	0.00609989	128	2	28	7	0.00213561	Growth hormone receptor signaling	STAT3;STAT5B	N-glycan branching	KIRC
TOTAL	36	2	0.00244582	0.00376361	0.035724	148	0	0.00848265	178	2	26	12	0.00198307	Interleukin-7 signaling	STAT3;STAT5B	N-glycan branching	KIRC
TOTAL	37	2	0.00251376	0.00396934	0.035724	288	0	0.0148208	311	2	16	1	0.00122035	Downstream signal transduction	STAT3;STAT5B	N-glycan branching	KIRC
TOTAL	43	2	0.00292139	0.00531062	0.0405848	127	0	0.00795844	167	2	26	4	0.00198307	Signaling by KIT in disease	STAT3;STAT5B	N-glycan branching	KIRC
TOTAL	45	2	0.00305727	0.00579783	0.0405848	227	0	0.0127716	268	2	35	4	0.00266951	Transcriptional regulation of pluripotent stem cells	STAT3;STAT3	N-glycan branching	KIRC
TOTAL	48	2	0.00326109	0.00656556	0.0459424	166	0	0.0100076	210	2	25	2	0.0019068	FGFR1 mutant receptor activation	STAT3;STAT5B	N-glycan branching	KIRC
TOTAL	52	2	0.00353285	0.00765707	0.0459424	405	0	0.0205395	431	2	59	18	0.00450004	Interleukin-2 family signaling	STAT3;STAT5B	N-glycan branching	KIRC
TOTAL	58	2	0.00394049	0.0094366	0.0535777	221	0	0.0129146	271	2	35	2	0.00266951	Signaling by FGFR1 in disease	STAT3;STAT5B	N-glycan branching	KIRC
TOTAL	62	2	0.00421224	0.0107155	0.0535777	524	0	0.0273065	573	2	15	4	0.00114408	SUMOylation of chromatin organization proteins	SATB1;PIAS1	N-glycan branching	KIRC
TOTAL	66	2	0.004484	0.0120668	0.0598896	260	0	0.0147255	309	2	39	4	0.0029746	Signaling by SCF-KIT	STAT3;STAT5B	N-glycan branching	KIRC
TOTAL	5	1	0.000339697	0.0124922	0.0598896	83	0	0.00414602	87	1	4	4	0.000305087	MET activates STAT3	STAT3	N-glycan branching	KIRC
TOTAL	5	1	0.000339697	0.0124922	0.0598896	83	0	0.00414602	87	1	1	1	7.62718e-05	Signalling to STAT3	STAT3	N-glycan branching	KIRC
TOTAL	6	1	0.000407636	0.0149724	0.0598896	3	0	0.000428898	9	1	3	3	0.000228815	p75NTR negatively regulates cell cycle via SC1	PRDM4	N-glycan branching	KIRC
TOTAL	7	1	0.000475576	0.0174465	0.069786	124	0	0.00614754	129	1	9	6	0.000686446	PTK6 Activates STAT3	STAT3	N-glycan branching	KIRC
TOTAL	86	2	0.00584279	0.0198559	0.071672	302	0	0.0176801	371	2	31	1	0.00236443	Signaling by PDGF	STAT3;STAT5B	N-glycan branching	KIRC
TOTAL	9	1	0.000611455	0.0223766	0.071672	0	0	0.000428898	9	1	3	3	0.000228815	STAT5 Activation	STAT5B	N-glycan branching	KIRC
TOTAL	9	1	0.000611455	0.0223766	0.071672	0	0	0.000428898	9	1	3	3	0.000228815	Erythropoietin activates STAT5	STAT5B	N-glycan branching	KIRC
TOTAL	95	2	0.00645424	0.0238907	0.071672	226	0	0.0147255	309	2	106	2	0.00808481	Signaling by FGFR in disease	STAT3;STAT5B	N-glycan branching	KIRC
TOTAL	11	1	0.000747333	0.0272826	0.0818478	136	0	0.00676706	142	1	12	6	0.000915262	Interleukin-23 signaling	STAT3	N-glycan branching	KIRC
TOTAL	11	1	0.000747333	0.0272826	0.0818478	60	0	0.00300229	63	1	4	1	0.000305087	BH3-only proteins associate with and inactivate anti-apoptotic BCL-2 members	STAT3	N-glycan branching	KIRC
TOTAL	13	1	0.000883212	0.0321646	0.0933364	192	0	0.00953107	200	1	20	5	0.00152544	Interleukin-27 signaling	STAT3	N-glycan branching	KIRC
TOTAL	16	1	0.00108703	0.039443	0.0933364	79	0	0.0044796	94	1	4	1	0.000305087	Regulation of IFNG signaling	PIAS1	N-glycan branching	KIRC
TOTAL	16	1	0.00108703	0.039443	0.0933364	174	0	0.00876859	184	1	26	3	0.00198307	Interleukin-35 Signalling	STAT3	N-glycan branching	KIRC
TOTAL	18	1	0.00122291	0.0442657	0.0933364	109	0	0.00586161	123	1	20	6	0.00152544	Interleukin-6 signaling	STAT3	N-glycan branching	KIRC
TOTAL	18	1	0.00122291	0.0442657	0.0933364	46	0	0.00300229	63	1	14	2	0.00106781	Prolactin receptor signaling	STAT5B	N-glycan branching	KIRC
TOTAL	19	1	0.00129085	0.0466682	0.0933364	82	0	0.00457491	96	1	19	5	0.00144916	Interleukin-2 signaling	STAT5B	N-glycan branching	KIRC
TOTAL	19	1	0.00129085	0.0466682	0.0933364	119	0	0.00648113	136	1	7	1	0.000533903	Signaling by PDGFRA extracellular domain mutants	STAT3	N-glycan branching	KIRC
TOTAL	19	1	0.00129085	0.0466682	0.0933364	119	0	0.00648113	136	1	7	1	0.000533903	Signaling by PDGFRA transmembrane, juxtamembrane and kinase domain mutants	STAT3	N-glycan branching	KIRC
TOTAL	20	1	0.00135879	0.0490648	0.0957842	375	0	0.018252	383	1	11	5	0.00083899	SUMOylation of transcription factors	PIAS1	N-glycan branching	KIRC
TOTAL	22	1	0.00149467	0.0538404	0.0957842	0	0	0.00104842	22	1	3	3	0.000228815	RNA Polymerase III Chain Elongation	POLR3A	N-glycan branching	KIRC
TOTAL	23	1	0.00156261	0.0562195	0.0957842	5	0	0.00133435	28	1	2	2	0.000152544	RNA Polymerase III Transcription Termination	POLR3A	N-glycan branching	KIRC
TOTAL	27	1	0.00183436	0.0656777	0.0957842	0	0	0.00128669	27	1	4	2	0.000305087	RNA Polymerase III Transcription Initiation From Type 2 Promoter	POLR3A	N-glycan branching	KIRC
TOTAL	28	1	0.0019023	0.0680278	0.0957842	23	0	0.00243042	51	1	4	2	0.000305087	RNA Polymerase III Transcription Initiation From Type 3 Promoter	POLR3A	N-glycan branching	KIRC
TOTAL	28	1	0.0019023	0.0680278	0.0957842	0	0	0.00133435	28	1	5	2	0.000381359	RNA Polymerase III Transcription Initiation From Type 1 Promoter	POLR3A	N-glycan branching	KIRC
TOTAL	31	1	0.00210612	0.0750436	0.0957842	135	0	0.00748189	157	1	34	6	0.00259324	Interleukin-6 family signaling	STAT3	N-glycan branching	KIRC
TOTAL	183	2	0.0124329	0.0773395	0.0957842	1665	0	0.0836352	1755	2	131	29	0.00999161	SUMO E3 ligases SUMOylate target proteins	SATB1;PIAS1	N-glycan branching	KIRC
TOTAL	189	2	0.0128405	0.0817359	0.0957842	808	0	0.0441289	926	2	141	2	0.0107543	Apoptosis	SATB1;STAT3	N-glycan branching	KIRC
TOTAL	192	2	0.0130444	0.083963	0.0957842	1702	0	0.0854937	1794	2	140	29	0.0106781	SUMOylation	SATB1;PIAS1	N-glycan branching	KIRC
TOTAL	35	1	0.00237788	0.0843181	0.0957842	166	0	0.00924514	194	1	24	3	0.00183052	Signaling by Erythropoietin	STAT5B	N-glycan branching	KIRC
TOTAL	36	1	0.00244582	0.0866226	0.0957842	23	0	0.00281167	59	1	13	6	0.000991534	RNA Polymerase III Transcription Initiation	POLR3A	N-glycan branching	KIRC
TOTAL	36	1	0.00244582	0.0866226	0.0957842	180	0	0.0101029	212	1	14	1	0.00106781	Interleukin-37 signaling	STAT3	N-glycan branching	KIRC
TOTAL	38	1	0.0025817	0.0912146	0.0957842	408	0	0.0205871	432	1	38	1	0.00289833	Apoptotic cleavage of cellular proteins	SATB1	N-glycan branching	KIRC
TOTAL	40	1	0.00271758	0.0957842	0.0957842	3	0	0.00204918	43	1	2	1	0.000152544	Association of TriC/CCT with target proteins during biosynthesis	STAT3	N-glycan branching	KIRC
TOTAL	40	1	0.00271758	0.0957842	0.0957842	548	0	0.0274018	575	1	25	10	0.0019068	SUMOylation of intracellular receptors	PIAS1	N-glycan branching	KIRC
TOTAL	191	6	0.0129764	4.69948e-06	0.00036656	200	0	0.018109	380	6	22	9	0.00167798	Interferon alpha/beta signaling	IRF8;STAT1;IRF4;IRF8;IRF4	GalNAc-type O-glycans	KIRC
TOTAL	401	7	0.0272437	3.1347e-05	0.00107098	602	0	0.0458921	963	7	69	20	0.00526276	Interferon Signaling	IRF8;STAT1;IRF4;IRF8;IRF4	GalNAc-type O-glycans	KIRC
TOTAL	4	2	0.000271758	4.11916e-05	0.00107098	0	0	0.000190621	4	2	2	2	0.000152544	RUNX3 regulates RUNX1-mediated transcription	RUNX1	GalNAc-type O-glycans	KIRC
TOTAL	255	5	0.0173245	0.000285568	0.00542579	172	0	0.019777	415	5	16	9	0.00122035	Interferon gamma signaling	IRF8;STAT1;IRF4;IRF8;IRF4	GalNAc-type O-glycans	KIRC
TOTAL	18	2	0.00122291	0.0008174	0.012261	109	0	0.00586161	123	2	20	6	0.00152544	Interleukin-6 signaling	STAT1	GalNAc-type O-glycans	KIRC
TOTAL	216	4	0.0146749	0.00151311	0.0175458	143	0	0.0165364	347	4	47	6	0.00358478	Interleukin-4 and Interleukin-13 signaling	STAT1;IRF4;STAT1;IRF4	GalNAc-type O-glycans	KIRC
TOTAL	28	2	0.0019023	0.00194953	0.0175458	127	0	0.00724361	152	2	11	4	0.00083899	Signaling by phosphorylated juxtamembrane, extracellular and kinase domain KIT mutants	STAT1	GalNAc-type O-glycans	KIRC
TOTAL	28	2	0.0019023	0.00194953	0.0175458	86	0	0.00543271	114	2	5	1	0.000381359	Regulation of IFNA signaling	STAT1	GalNAc-type O-glycans	KIRC
TOTAL	31	2	0.00210612	0.00237934	0.0177216	135	0	0.00748189	157	2	34	6	0.00259324	Interleukin-6 family signaling	STAT1	GalNAc-type O-glycans	KIRC
TOTAL	32	2	0.00217406	0.00253166	0.0177216	137	0	0.00781548	164	2	19	18	0.00144916	Regulation of RUNX1 Expression and Activity	RUNX1;RUNX1	GalNAc-type O-glycans	KIRC
TOTAL	118	3	0.00801685	0.0025604	0.0179228	378	0	0.022398	470	3	47	4	0.00358478	Transcriptional regulation by RUNX3	RUNX1;RUNX1	GalNAc-type O-glycans	KIRC
TOTAL	36	2	0.00244582	0.0031857	0.0191142	73	0	0.00500381	105	2	22	6	0.00167798	NOTCH3 Intracellular Domain Regulates Transcription	IKZF1;STAT1	GalNAc-type O-glycans	KIRC
TOTAL	43	2	0.00292139	0.00449938	0.0269963	127	0	0.00795844	167	2	26	4	0.00198307	Signaling by KIT in disease	STAT1	GalNAc-type O-glycans	KIRC
TOTAL	63	2	0.00428018	0.00938419	0.0410196	190	0	0.0118185	248	2	37	6	0.00282206	Signaling by NOTCH3	IKZF1;STAT1	GalNAc-type O-glycans	KIRC
TOTAL	1332	8	0.0904953	0.00955463	0.0410196	2691	0	0.175229	3677	8	741	70	0.0565174	Cytokine Signaling in Immune system	IRF8;STAT1;IRF4;IRF8;STAT1;IRF4	GalNAc-type O-glycans	KIRC
TOTAL	66	2	0.004484	0.0102549	0.0410196	260	0	0.0147255	309	2	39	4	0.0029746	Signaling by SCF-KIT	STAT1	GalNAc-type O-glycans	KIRC
TOTAL	6	1	0.000407636	0.0137668	0.04813	18	0	0.00109607	23	1	2	1	0.000152544	RUNX2 regulates genes involved in differentiation of myeloid cells	RUNX1	GalNAc-type O-glycans	KIRC
TOTAL	647	5	0.0439568	0.0157528	0.04813	1886	0	0.111275	2335	5	493	48	0.037602	Signaling by Interleukins	STAT1;IRF4;STAT1;IRF4	GalNAc-type O-glycans	KIRC
TOTAL	7	1	0.000475576	0.0160433	0.04813	74	0	0.00381243	80	1	4	4	0.000305087	RUNX1 regulates transcription of genes involved in BCR signaling	RUNX1	GalNAc-type O-glycans	KIRC
TOTAL	7	1	0.000475576	0.0160433	0.04813	5	0	0.000571864	12	1	5	5	0.000381359	RUNX1 regulates transcription of genes involved in interleukin signaling	RUNX1	GalNAc-type O-glycans	KIRC
TOTAL	8	1	0.000543515	0.0183147	0.0546992	50	0	0.00276401	58	1	6	6	0.000457631	RUNX1 regulates expression of components of tight junctions	RUNX1	GalNAc-type O-glycans	KIRC
TOTAL	9	1	0.000611455	0.0205811	0.0546992	63	0	0.00338353	71	1	4	4	0.000305087	RUNX1 regulates transcription of genes involved in WNT signaling	RUNX1	GalNAc-type O-glycans	KIRC
TOTAL	258	3	0.0175284	0.0215035	0.0546992	670	0	0.0421273	884	3	154	8	0.0117459	Signaling by NOTCH	RUNX1;IKZF1;STAT1	GalNAc-type O-glycans	KIRC
TOTAL	10	1	0.000679394	0.0228423	0.0546992	95	0	0.0049085	103	1	8	7	0.000610175	RUNX1 regulates estrogen receptor mediated transcription	RUNX1	GalNAc-type O-glycans	KIRC
TOTAL	11	1	0.000747333	0.0250985	0.0546992	55	0	0.0030976	65	1	7	7	0.000533903	RUNX1 regulates transcription of genes involved in differentiation of myeloid cells	RUNX1	GalNAc-type O-glycans	KIRC
TOTAL	11	1	0.000747333	0.0250985	0.0546992	22	0	0.00157263	33	1	8	6	0.000610175	RUNX1 regulates transcription of genes involved in differentiation of keratinocytes	RUNX1	GalNAc-type O-glycans	KIRC
TOTAL	12	1	0.000815273	0.0273496	0.0546992	1	0	0.00061952	13	1	5	2	0.000381359	Interleukin-21 signaling	STAT1	GalNAc-type O-glycans	KIRC
TOTAL	13	1	0.000883212	0.0295957	0.0591914	192	0	0.00953107	200	1	20	5	0.00152544	Interleukin-27 signaling	STAT1	GalNAc-type O-glycans	KIRC
TOTAL	16	1	0.00108703	0.0363038	0.0726075	79	0	0.0044796	94	1	4	2	0.000305087	Regulation of IFNG signaling	STAT1	GalNAc-type O-glycans	KIRC
TOTAL	16	1	0.00108703	0.0363038	0.0726075	174	0	0.00876859	184	1	26	12	0.00198307	Interleukin-35 Signalling	STAT1	GalNAc-type O-glycans	KIRC
TOTAL	16	1	0.00108703	0.0363038	0.0726075	129	0	0.00676706	142	1	13	6	0.000991534	Interleukin-9 signaling	STAT1	GalNAc-type O-glycans	KIRC
TOTAL	16	1	0.00108703	0.0363038	0.0726075	98	0	0.0053374	112	1	8	2	0.000610175	RUNX3 regulates p14-ARF	RUNX1	GalNAc-type O-glycans	KIRC
TOTAL	17	1	0.00115497	0.0385298	0.0770595	38	0	0.00252573	53	1	20	20	0.00152544	RUNX1 and FOXP3 control the development of regulatory T lymphocytes (Tregs)	RUNX1	GalNAc-type O-glycans	KIRC
TOTAL	19	1	0.00129085	0.0429668	0.082016	119	0	0.00648113	136	1	7	1	0.000533903	Signaling by PDGFRA transmembrane, juxtamembrane and kinase domain mutants	STAT1	GalNAc-type O-glycans	KIRC
TOTAL	19	1	0.00129085	0.0429668	0.082016	119	0	0.00648113	136	1	7	1	0.000533903	Signaling by PDGFRA extracellular domain mutants	STAT1	GalNAc-type O-glycans	KIRC
TOTAL	147	2	0.00998709	0.0453134	0.082016	485	0	0.0289268	607	2	84	3	0.00640683	Transcriptional regulation by RUNX2	RUNX1;STAT1	GalNAc-type O-glycans	KIRC
TOTAL	26	1	0.00176642	0.0583405	0.082016	163	0	0.0088639	186	1	14	1	0.00106781	Signaling by cytosolic FGFR1 fusion mutants	STAT1	GalNAc-type O-glycans	KIRC
TOTAL	29	1	0.00197024	0.0648556	0.082016	183	0	0.00962638	202	1	56	11	0.00427122	Interleukin-20 family signaling	STAT1	GalNAc-type O-glycans	KIRC
TOTAL	29	1	0.00197024	0.0648556	0.082016	105	0	0.00609989	128	1	28	2	0.00213561	Growth hormone receptor signaling	STAT1	GalNAc-type O-glycans	KIRC
TOTAL	37	1	0.00251376	0.082016	0.082016	288	0	0.0148208	311	1	16	1	0.00122035	Downstream signal transduction	STAT1	GalNAc-type O-glycans	KIRC
TOTAL	39	1	0.00264964	0.0862582	0.0862582	59	0	0.0044796	94	1	5	5	0.000381359	RUNX1 interacts with co-factors whose precise effect on RUNX1 targets is not known	RUNX1	GalNAc-type O-glycans	KIRC
TOTAL	39	1	0.00264964	0.0862582	0.0862582	11	0	0.00238277	50	1	9	1	0.000686446	Organic cation transport	RUNX1	GalNAc-type O-glycans	KIRC
TOTAL	42	1	0.00285345	0.0925857	0.0925857	128	0	0.0080061	168	1	24	2	0.00183052	Signaling by PDGFR in disease	STAT1	GalNAc-type O-glycans	KIRC
TOTAL	4	2	0.000271758	5.749e-06	0.000201215	199	0	0.00962638	202	2	5	4	0.000381359	Regulation of TP53 Expression	PRDM1;PRDM1	CS HS Initiation	KIRC
TOTAL	154	3	0.0104627	0.000302804	0.00514767	847	0	0.0461304	968	3	66	3	0.00503394	Estrogen-dependent gene expression	CHD1;CHD1	CS HS Initiation	KIRC
TOTAL	46	2	0.00312521	0.000744566	0.00819022	484	0	0.0247331	519	2	35	4	0.00266951	Regulation of TP53 Expression and Degradation	PRDM1;PRDM1	CS HS Initiation	KIRC
TOTAL	256	3	0.0173925	0.00132025	0.010562	1051	0	0.0599028	1257	3	110	3	0.0083899	ESR-mediated signaling	CHD1;CHD1	CS HS Initiation	KIRC
TOTAL	385	3	0.0261567	0.00420336	0.0294235	1273	0	0.0759626	1594	3	191	3	0.0145679	Signaling by Nuclear Receptors	CHD1;CHD1	CS HS Initiation	KIRC
TOTAL	9	1	0.000611455	0.00791981	0.0395024	297	0	0.0143919	302	1	6	2	0.000457631	PTK6 promotes HIF1A stabilization	HIF1A	CS HS Initiation	KIRC
TOTAL	10	1	0.000679394	0.00879621	0.0395024	53	0	0.00295463	62	1	3	2	0.000228815	PTK6 Expression	HIF1A	CS HS Initiation	KIRC
TOTAL	178	2	0.0120932	0.0104401	0.0395024	990	0	0.0538506	1130	2	98	4	0.00747464	Regulation of TP53 Activity	PRDM1;PRDM1	CS HS Initiation	KIRC
TOTAL	15	1	0.00101909	0.0131675	0.0395024	91	0	0.00481319	101	1	7	7	0.000533903	Regulation of gene expression by Hypoxia-inducible Factor	HIF1A	CS HS Initiation	KIRC
TOTAL	216	2	0.0146749	0.0150859	0.0452577	143	0	0.0165364	347	2	47	1	0.00358478	Interleukin-4 and Interleukin-13 signaling	HIF1A;HIF1A	CS HS Initiation	KIRC
TOTAL	57	1	0.00387255	0.0491898	0.0880591	247	0	0.0138677	291	1	18	1	0.00137289	NOTCH1 Intracellular Domain Regulates Transcription	HIF1A	CS HS Initiation	KIRC
TOTAL	71	1	0.0048237	0.0609249	0.0880591	692	0	0.0352173	739	1	53	4	0.00404241	Signaling by PTK6	HIF1A	CS HS Initiation	KIRC
TOTAL	71	1	0.0048237	0.0609249	0.0880591	692	0	0.0352173	739	1	53	4	0.00404241	Signaling by Non-Receptor Tyrosine Kinases	HIF1A	CS HS Initiation	KIRC
TOTAL	72	1	0.00489164	0.061758	0.0880591	50	0	0.00538506	113	1	12	8	0.000915262	Oxygen-dependent proline hydroxylation of Hypoxia-inducible Factor Alpha	HIF1A	CS HS Initiation	KIRC
TOTAL	486	2	0.0330185	0.066805	0.0880591	1484	0	0.0880194	1847	2	259	4	0.0197544	Transcriptional Regulation by TP53	PRDM1;PRDM1	CS HS Initiation	KIRC
TOTAL	84	1	0.00570691	0.0717019	0.0880591	280	0	0.0165841	348	1	39	1	0.0029746	Signaling by NOTCH1	HIF1A	CS HS Initiation	KIRC
TOTAL	85	1	0.00577485	0.0725261	0.0880591	138	0	0.00986466	207	1	20	16	0.00152544	Cellular response to hypoxia	HIF1A	CS HS Initiation	KIRC
TOTAL	104	1	0.0070657	0.0880591	0.0880591	437	0	0.0246378	517	1	59	1	0.00450004	Circadian Clock	HIF1A	CS HS Initiation	KIRC
TOTAL	108	1	0.00733745	0.0912985	0.0912985	414	0	0.0236847	497	1	18	1	0.00137289	Transcriptional regulation of white adipocyte differentiation	NR2F2	CS HS Initiation	KIRC
TOTAL	4	2	0.000271758	3.64322e-05	0.00153015	0	0	0.000190621	4	2	2	2	0.000152544	RUNX3 regulates RUNX1-mediated transcription	RUNX1	CS-DS extension	KIRC
TOTAL	4	2	0.000271758	3.64322e-05	0.00153015	199	0	0.00962638	202	2	5	4	0.000381359	Regulation of TP53 Expression	PRDM1;PRDM1	CS-DS extension	KIRC
TOTAL	216	4	0.0146749	0.00120089	0.0336249	143	0	0.0165364	347	4	47	1	0.00358478	Interleukin-4 and Interleukin-13 signaling	HIF1A;FOXO1;HIF1A;FOXO1	CS-DS extension	KIRC
TOTAL	118	3	0.00801685	0.0021477	0.0359168	378	0	0.022398	470	3	47	4	0.00358478	Transcriptional regulation by RUNX3	RUNX1;RUNX1	CS-DS extension	KIRC
TOTAL	32	2	0.00217406	0.0022448	0.0359168	137	0	0.00781548	164	2	19	18	0.00144916	Regulation of RUNX1 Expression and Activity	RUNX1;RUNX1	CS-DS extension	KIRC
TOTAL	46	2	0.00312521	0.00455167	0.0637233	484	0	0.0247331	519	2	35	4	0.00266951	Regulation of TP53 Expression and Degradation	PRDM1;PRDM1	CS-DS extension	KIRC
TOTAL	6	1	0.000407636	0.0129623	0.0945588	11	0	0.000762486	16	1	2	2	0.000152544	AKT-mediated inactivation of FOXO1A	FOXO1	CS-DS extension	KIRC
TOTAL	6	1	0.000407636	0.0129623	0.0945588	18	0	0.00109607	23	1	2	1	0.000152544	RUNX2 regulates genes involved in differentiation of myeloid cells	RUNX1	CS-DS extension	KIRC
TOTAL	7	1	0.000475576	0.0151068	0.0945588	5	0	0.000571864	12	1	5	5	0.000381359	RUNX1 regulates transcription of genes involved in interleukin signaling	RUNX1	CS-DS extension	KIRC
TOTAL	7	1	0.000475576	0.0151068	0.0945588	74	0	0.00381243	80	1	4	4	0.000305087	RUNX1 regulates transcription of genes involved in BCR signaling	RUNX1	CS-DS extension	KIRC
TOTAL	8	1	0.000543515	0.0172468	0.0945588	50	0	0.00276401	58	1	6	6	0.000457631	RUNX1 regulates expression of components of tight junctions	RUNX1	CS-DS extension	KIRC
TOTAL	9	1	0.000611455	0.0193822	0.0945588	63	0	0.00338353	71	1	4	4	0.000305087	RUNX1 regulates transcription of genes involved in WNT signaling	RUNX1	CS-DS extension	KIRC
TOTAL	9	1	0.000611455	0.0193822	0.0945588	297	0	0.0143919	302	1	6	2	0.000457631	PTK6 promotes HIF1A stabilization	HIF1A	CS-DS extension	KIRC
TOTAL	10	1	0.000679394	0.0215132	0.0945588	95	0	0.0049085	103	1	8	7	0.000610175	RUNX1 regulates estrogen receptor mediated transcription	RUNX1	CS-DS extension	KIRC
TOTAL	10	1	0.000679394	0.0215132	0.0945588	53	0	0.00295463	62	1	3	2	0.000228815	PTK6 Expression	HIF1A	CS-DS extension	KIRC
TOTAL	11	1	0.000747333	0.0236397	0.0945588	55	0	0.0030976	65	1	7	7	0.000533903	RUNX1 regulates transcription of genes involved in differentiation of myeloid cells	RUNX1	CS-DS extension	KIRC
TOTAL	11	1	0.000747333	0.0236397	0.0945588	22	0	0.00157263	33	1	8	6	0.000610175	RUNX1 regulates transcription of genes involved in differentiation of keratinocytes	RUNX1	CS-DS extension	KIRC
TOTAL	39	4	0.00264964	3.38535e-06	0.000209891	94	0	0.00629051	132	4	14	12	0.00106781	Regulation of MECP2 expression and activity	MECP2;MECP2	HS extension	KIRC
TOTAL	2	2	0.000135879	1.29373e-05	0.000401055	0	0	9.53107e-05	2	2	1	1	7.62718e-05	Loss of MECP2 binding ability to 5hmC-DNA	MECP2	HS extension	KIRC
TOTAL	5	2	0.000339697	8.04636e-05	0.00156908	0	0	0.000238277	5	2	2	2	0.000152544	Loss of MECP2 binding ability to 5mC-DNA	MECP2	HS extension	KIRC
TOTAL	6	2	0.000407636	0.000115679	0.00156908	45	0	0.00243042	51	2	4	4	0.000305087	MECP2 regulates transcription of genes involved in GABA signaling	MECP2	HS extension	KIRC
TOTAL	100	4	0.00679394	0.000130757	0.00156908	359	0	0.0214449	450	4	77	73	0.00587293	Transcriptional Regulation by MECP2	MECP2;MECP2	HS extension	KIRC
TOTAL	7	2	0.000475576	0.000157196	0.00157196	0	0	0.000333587	7	2	1	1	7.62718e-05	Loss of phosphorylation of MECP2 at T308	MECP2	HS extension	KIRC
TOTAL	8	2	0.000543515	0.000204983	0.00163986	0	0	0.000381243	8	2	1	1	7.62718e-05	Loss of MECP2 binding ability to the NCoR/SMRT complex	MECP2	HS extension	KIRC
TOTAL	10	2	0.000679394	0.000319244	0.00223471	45	0	0.00252573	53	2	8	8	0.000610175	MECP2 regulates transcription factors	MECP2	HS extension	KIRC
TOTAL	13	2	0.000883212	0.000536894	0.00322137	11	0	0.00114373	24	2	8	8	0.000610175	MECP2 regulates transcription of neuronal ligands	MECP2	HS extension	KIRC
TOTAL	16	2	0.00108703	0.000809324	0.0032373	0	0	0.000762486	16	2	5	5	0.000381359	Disorders of Nervous System Development	MECP2	HS extension	KIRC
TOTAL	16	2	0.00108703	0.000809324	0.0032373	0	0	0.000762486	16	2	5	5	0.000381359	Loss of function of MECP2 in Rett syndrome	MECP2	HS extension	KIRC
TOTAL	16	2	0.00108703	0.000809324	0.0032373	0	0	0.000762486	16	2	5	5	0.000381359	Disorders of Developmental Biology	MECP2	HS extension	KIRC
TOTAL	16	2	0.00108703	0.000809324	0.0032373	0	0	0.000762486	16	2	5	5	0.000381359	Pervasive developmental disorders	MECP2	HS extension	KIRC
TOTAL	26	2	0.00176642	0.00210267	0.00841067	100	0	0.0057663	121	2	9	1	0.000686446	NOTCH4 Intracellular Domain Regulates Transcription	HEY1;HEY1	HS extension	KIRC
TOTAL	32	2	0.00217406	0.00315424	0.0118988	108	0	0.00657644	138	2	26	26	0.00198307	MECP2 regulates neuronal receptors and channels	MECP2	HS extension	KIRC
TOTAL	36	2	0.00244582	0.00396626	0.0118988	73	0	0.00500381	105	2	22	2	0.00167798	NOTCH3 Intracellular Domain Regulates Transcription	HEY1;HEY1	HS extension	KIRC
TOTAL	57	2	0.00387255	0.00961087	0.0268749	247	0	0.0138677	291	2	18	2	0.00137289	NOTCH1 Intracellular Domain Regulates Transcription	HEY1;HEY1	HS extension	KIRC
TOTAL	63	2	0.00428018	0.0116275	0.0268749	190	0	0.0118185	248	2	37	2	0.00282206	Signaling by NOTCH3	HEY1;HEY1	HS extension	KIRC
TOTAL	68	2	0.00461988	0.0134375	0.0268749	212	0	0.0128193	269	2	21	2	0.00160171	Constitutive Signaling by NOTCH1 PEST Domain Mutants	HEY1;HEY1	HS extension	KIRC
TOTAL	68	2	0.00461988	0.0134375	0.0268749	212	0	0.0128193	269	2	21	2	0.00160171	Constitutive Signaling by NOTCH1 HD+PEST Domain Mutants	HEY1;HEY1	HS extension	KIRC
TOTAL	68	2	0.00461988	0.0134375	0.0268749	212	0	0.0128193	269	2	21	2	0.00160171	Signaling by NOTCH1 HD+PEST Domain Mutants in Cancer	HEY1;HEY1	HS extension	KIRC
TOTAL	68	2	0.00461988	0.0134375	0.0268749	212	0	0.0128193	269	2	21	2	0.00160171	Signaling by NOTCH1 PEST Domain Mutants in Cancer	HEY1;HEY1	HS extension	KIRC
TOTAL	68	2	0.00461988	0.0134375	0.0268749	212	0	0.0128193	269	2	39	2	0.0029746	Signaling by NOTCH1 in Cancer	HEY1;HEY1	HS extension	KIRC
TOTAL	71	2	0.0048237	0.0145786	0.0291572	333	0	0.0186809	392	2	27	2	0.00205934	Transcriptional regulation of granulopoiesis	TAL1;GATA2	HS extension	KIRC
TOTAL	84	2	0.00570691	0.0199831	0.0399663	280	0	0.0165841	348	2	39	2	0.0029746	Signaling by NOTCH1	HEY1;HEY1	HS extension	KIRC
TOTAL	92	2	0.00625042	0.0236643	0.0420302	183	0	0.0126763	266	2	20	1	0.00152544	Signaling by NOTCH4	HEY1;HEY1	HS extension	KIRC
TOTAL	10	1	0.000679394	0.0254951	0.0420302	157	0	0.00791079	166	1	4	4	0.000305087	Binding of TCF/LEF:CTNNB1 to target gene promoters	TCF7L1	HS extension	KIRC
TOTAL	10	1	0.000679394	0.0254951	0.0420302	141	0	0.00700534	147	1	5	3	0.000381359	RUNX3 regulates WNT signaling	TCF7L1	HS extension	KIRC
TOTAL	12	1	0.000815273	0.0305176	0.0420302	0	0	0.000571864	12	1	2	1	0.000152544	Phase 3 - rapid repolarisation	ERG	HS extension	KIRC
TOTAL	106	2	0.00720158	0.0307165	0.0420302	131	0	0.0111037	233	2	15	3	0.00114408	RUNX1 regulates transcription of genes involved in differentiation of HSCs	TAL1;GATA2	HS extension	KIRC
TOTAL	16	1	0.00108703	0.0404872	0.0420302	252	0	0.0127716	268	1	7	5	0.000533903	Repression of WNT target genes	TCF7L1	HS extension	KIRC
TOTAL	1554	8	0.105578	0.0420302	0.0420302	3712	0	0.22927	4811	8	824	80	0.062848	Generic Transcription Pathway	TAL1;MECP2;HEY1;MECP2;GATA2;TCF7L1	HS extension	KIRC
TOTAL	1693	8	0.115021	0.0640764	0.0640764	3857	0	0.239802	5032	8	885	80	0.0675006	RNA Polymerase II Transcription	TAL1;MECP2;HEY1;MECP2;GATA2;TCF7L1	HS extension	KIRC
TOTAL	34	1	0.00230994	0.0841285	0.0841285	210	0	0.0115326	242	1	24	1	0.00183052	RUNX2 regulates osteoblast differentiation	HEY1	HS extension	KIRC
TOTAL	1851	8	0.125756	0.0968972	0.0968972	4048	0	0.253241	5314	8	996	80	0.0759667	Gene expression (Transcription)	TAL1;MECP2;HEY1;MECP2;GATA2;TCF7L1	HS extension	KIRC
TOTAL	10	1	0.000679394	0.00812233	0.0793049	13	0	0.00100076	21	1	7	1	0.000533903	POU5F1 (OCT4), SOX2, NANOG repress genes related to differentiation	GATA6	Hyaluronan synthesis	KIRC
TOTAL	23	1	0.00156261	0.018591	0.0793049	60	0	0.00390774	82	1	6	1	0.000457631	RHO GTPases activate CIT	MYH11	Hyaluronan synthesis	KIRC
TOTAL	26	1	0.00176642	0.0209924	0.0793049	38	0	0.00300229	63	1	7	2	0.000533903	RHO GTPases Activate ROCKs	MYH11	Hyaluronan synthesis	KIRC
TOTAL	26	1	0.00176642	0.0209924	0.0793049	33	0	0.00271636	57	1	7	1	0.000533903	Sema4D induced cell migration and growth-cone collapse	MYH11	Hyaluronan synthesis	KIRC
TOTAL	27	1	0.00183436	0.0217916	0.0793049	71	0	0.00443195	93	1	15	3	0.00114408	RHO GTPases activate PAKs	MYH11	Hyaluronan synthesis	KIRC
TOTAL	32	1	0.00217406	0.025779	0.0793049	33	0	0.00300229	63	1	13	1	0.000991534	Sema4D in semaphorin signaling	MYH11	Hyaluronan synthesis	KIRC
TOTAL	33	1	0.002242	0.0265747	0.0793049	34	0	0.0030976	65	1	4	1	0.000305087	EPHA-mediated growth cone collapse	MYH11	Hyaluronan synthesis	KIRC
TOTAL	45	1	0.00305727	0.0360766	0.0793049	227	0	0.0127716	268	1	35	1	0.00266951	Transcriptional regulation of pluripotent stem cells	GATA6	Hyaluronan synthesis	KIRC
TOTAL	52	1	0.00353285	0.0415801	0.0793049	50	0	0.00476554	100	1	29	3	0.00221188	Surfactant metabolism	GATA6	Hyaluronan synthesis	KIRC
TOTAL	55	1	0.00373667	0.0439298	0.0793049	94	0	0.00700534	147	1	11	4	0.00083899	Smooth Muscle Contraction	MYH11	Hyaluronan synthesis	KIRC
TOTAL	70	1	0.00475576	0.0555998	0.0793049	104	0	0.00810141	170	1	15	2	0.00114408	Regulation of PTEN gene transcription	SNAI2	Hyaluronan synthesis	KIRC
TOTAL	72	1	0.00489164	0.0571459	0.0793049	146	0	0.00972169	204	1	41	1	0.00312715	Semaphorin interactions	MYH11	Hyaluronan synthesis	KIRC
TOTAL	80	1	0.00543515	0.063307	0.0793049	198	0	0.0130099	273	1	20	1	0.00152544	RHO GTPases activate PKNs	MYH11	Hyaluronan synthesis	KIRC
TOTAL	101	1	0.00686188	0.0793049	0.0793049	670	0	0.0356462	748	1	56	1	0.00427122	EPH-Ephrin signaling	MYH11	Hyaluronan synthesis	KIRC
TOTAL	86	3	0.00584279	0.000719595	0.0215878	27	0	0.00509912	107	3	2	2	0.000152544	Nuclear Receptor transcription pathway	RARA;NR4A1;NR2C2	O-mannose	KIRC
TOTAL	29	3	0.00197024	2.41472e-05	0.00164201	163	0	0.0088639	186	3	20	7	0.00152544	Response of EIF2AK1 (HRI) to heme deficiency	DDIT3;DDIT3	O-Fucosylation	KIRC
TOTAL	45	3	0.00305727	8.84033e-05	0.00300571	227	0	0.0127716	268	3	35	33	0.00266951	Transcriptional regulation of pluripotent stem cells	POU5F1;POU5F1	O-Fucosylation	KIRC
TOTAL	15	2	0.00101909	0.000385702	0.00840223	104	0	0.00543271	114	2	5	1	0.000381359	ATF6 (ATF6-alpha) activates chaperone genes	DDIT3;DDIT3	O-Fucosylation	KIRC
TOTAL	17	2	0.00115497	0.000494249	0.00840223	104	0	0.00552802	116	2	10	1	0.000762718	ATF6 (ATF6-alpha) activates chaperones	DDIT3;DDIT3	O-Fucosylation	KIRC
TOTAL	115	3	0.00781303	0.00134989	0.0175486	170	0	0.0133435	280	3	16	5	0.00122035	Response of EIF2AK4 (GCN2) to amino acid deficiency	DDIT3;DDIT3	O-Fucosylation	KIRC
TOTAL	34	2	0.00230994	0.00193791	0.021317	80	0	0.00519443	109	2	7	1	0.000533903	ATF4 activates genes in response to endoplasmic reticulum stress	DDIT3;DDIT3	O-Fucosylation	KIRC
TOTAL	42	2	0.00285345	0.00292953	0.0263657	82	0	0.00557568	117	2	11	1	0.00083899	PERK regulates gene expression	DDIT3;DDIT3	O-Fucosylation	KIRC
TOTAL	4	2	0.000271758	2.20635e-05	0.00247112	0	0	0.000190621	4	2	2	2	0.000152544	RUNX3 regulates RUNX1-mediated transcription	RUNX1	Type 1 and 2 LacNAc	KIRC
TOTAL	10	2	0.000679394	0.000137038	0.00767415	45	0	0.00252573	53	2	8	2	0.000610175	MECP2 regulates transcription factors	MEF2C;MEF2C	Type 1 and 2 LacNAc	KIRC
TOTAL	118	3	0.00801685	0.0010384	0.0384029	378	0	0.022398	470	3	47	4	0.00358478	Transcriptional regulation by RUNX3	RUNX1;RUNX1	Type 1 and 2 LacNAc	KIRC
TOTAL	32	2	0.00217406	0.00137153	0.0384029	137	0	0.00781548	164	2	19	18	0.00144916	Regulation of RUNX1 Expression and Activity	RUNX1;RUNX1	Type 1 and 2 LacNAc	KIRC
TOTAL	10	2	0.000679394	7.83243e-05	0.00250638	45	0	0.00252573	53	2	8	2	0.000610175	MECP2 regulates transcription factors	PPARG;PPARG	fucosylation	KIRC
TOTAL	86	2	0.00584279	0.00546431	0.067788	27	0	0.00509912	107	2	2	2	0.000152544	Nuclear Receptor transcription pathway	NR2F1;PPARG	fucosylation	KIRC
TOTAL	100	2	0.00679394	0.00730932	0.067788	359	0	0.0214449	450	2	77	2	0.00587293	Transcriptional Regulation by MECP2	PPARG;PPARG	fucosylation	KIRC
TOTAL	108	2	0.00733745	0.0084735	0.067788	414	0	0.0236847	497	2	18	14	0.00137289	Transcriptional regulation of white adipocyte differentiation	PPARG;PPARG	fucosylation	KIRC
TOTAL	10	2	0.000679394	0.000390288	0.0286624	45	0	0.00252573	53	2	8	2	0.000610175	MECP2 regulates transcription factors	PPARG;PPARG	ABO blood group	KIRC
TOTAL	16	2	0.00108703	0.00098836	0.0286624	11	0	0.00119138	25	2	7	4	0.000533903	RUNX3 regulates NOTCH signaling	HES1;HES1	ABO blood group	KIRC
TOTAL	16	2	0.00108703	0.00098836	0.0286624	76	0	0.00424133	89	2	9	2	0.000686446	NOTCH2 intracellular domain regulates transcription	HES1;HES1	ABO blood group	KIRC
TOTAL	20	2	0.00135879	0.0015332	0.0321971	21	0	0.00195387	41	2	4	2	0.000305087	Regulation of gene expression in late stage (branching morphogenesis) pancreatic bud precursor cells	HES1;HES1	ABO blood group	KIRC
TOTAL	26	2	0.00176642	0.0025632	0.0435744	100	0	0.0057663	121	2	9	1	0.000686446	NOTCH4 Intracellular Domain Regulates Transcription	HES1;HES1	ABO blood group	KIRC
TOTAL	118	3	0.00801685	0.00468387	0.0535815	378	0	0.022398	470	3	47	9	0.00358478	Transcriptional regulation by RUNX3	HES1;HES1;TCF7L2	ABO blood group	KIRC
TOTAL	36	2	0.00244582	0.00482632	0.0535815	73	0	0.00500381	105	2	22	3	0.00167798	NOTCH3 Intracellular Domain Regulates Transcription	HES1;HES1	ABO blood group	KIRC
TOTAL	38	2	0.0025817	0.00535815	0.0535815	81	0	0.00552802	116	2	20	2	0.00152544	Signaling by NOTCH2	HES1;HES1	ABO blood group	KIRC
TOTAL	42	2	0.00285345	0.00649863	0.0584877	144	0	0.00814907	171	2	19	6	0.00144916	Oncogene Induced Senescence	ETS2;ETS2	ABO blood group	KIRC
TOTAL	3	1	0.000203818	0.00852469	0.0650347	0	0	0.000142966	3	1	1	1	7.62718e-05	TCF7L2 mutants don't bind CTBP	TCF7L2	ABO blood group	KIRC
TOTAL	57	2	0.00387255	0.0116513	0.0650347	247	0	0.0138677	291	2	18	3	0.00137289	NOTCH1 Intracellular Domain Regulates Transcription	HES1;HES1	ABO blood group	KIRC
TOTAL	63	2	0.00428018	0.0140811	0.0650347	190	0	0.0118185	248	2	37	3	0.00282206	Signaling by NOTCH3	HES1;HES1	ABO blood group	KIRC
TOTAL	67	2	0.00455194	0.0158123	0.0650347	149	0	0.0101029	212	2	26	2	0.00198307	Regulation of beta-cell development	HES1;HES1	ABO blood group	KIRC
TOTAL	68	2	0.00461988	0.0162587	0.0650347	212	0	0.0128193	269	2	21	2	0.00160171	Signaling by NOTCH1 PEST Domain Mutants in Cancer	HES1;HES1	ABO blood group	KIRC
TOTAL	68	2	0.00461988	0.0162587	0.0650347	212	0	0.0128193	269	2	21	2	0.00160171	Constitutive Signaling by NOTCH1 HD+PEST Domain Mutants	HES1;HES1	ABO blood group	KIRC
TOTAL	68	2	0.00461988	0.0162587	0.0650347	212	0	0.0128193	269	2	21	2	0.00160171	Signaling by NOTCH1 HD+PEST Domain Mutants in Cancer	HES1;HES1	ABO blood group	KIRC
TOTAL	68	2	0.00461988	0.0162587	0.0650347	212	0	0.0128193	269	2	21	2	0.00160171	Constitutive Signaling by NOTCH1 PEST Domain Mutants	HES1;HES1	ABO blood group	KIRC
TOTAL	68	2	0.00461988	0.0162587	0.0650347	212	0	0.0128193	269	2	39	2	0.0029746	Signaling by NOTCH1 in Cancer	HES1;HES1	ABO blood group	KIRC
TOTAL	84	2	0.00570691	0.0241107	0.0844221	280	0	0.0165841	348	2	39	3	0.0029746	Signaling by NOTCH1	HES1;HES1	ABO blood group	KIRC
TOTAL	86	2	0.00584279	0.0251825	0.0844221	27	0	0.00509912	107	2	2	2	0.000152544	Nuclear Receptor transcription pathway	NR2F1;PPARG	ABO blood group	KIRC
TOTAL	10	1	0.000679394	0.0281407	0.0844221	157	0	0.00791079	166	1	4	4	0.000305087	Binding of TCF/LEF:CTNNB1 to target gene promoters	TCF7L2	ABO blood group	KIRC
TOTAL	10	1	0.000679394	0.0281407	0.0844221	141	0	0.00700534	147	1	5	5	0.000381359	RUNX3 regulates WNT signaling	TCF7L2	ABO blood group	KIRC
TOTAL	92	2	0.00625042	0.0285123	0.085537	183	0	0.0126763	266	2	20	1	0.00152544	Signaling by NOTCH4	HES1;HES1	ABO blood group	KIRC
TOTAL	100	2	0.00679394	0.0332103	0.0996308	359	0	0.0214449	450	2	77	2	0.00587293	Transcriptional Regulation by MECP2	PPARG;PPARG	ABO blood group	KIRC
TOTAL	17	3	0.00115497	4.93916e-06	0.000325985	38	0	0.00252573	53	3	20	20	0.00152544	RUNX1 and FOXP3 control the development of regulatory T lymphocytes (Tregs)	RUNX1;FOXP3;FOXP3	sulfotransferases	KIRC
TOTAL	4	2	0.000271758	2.7785e-05	0.000916904	0	0	0.000190621	4	2	2	2	0.000152544	RUNX3 regulates RUNX1-mediated transcription	RUNX1	sulfotransferases	KIRC
TOTAL	9	2	0.000611455	0.000139836	0.00307639	63	0	0.00338353	71	2	4	4	0.000305087	RUNX1 regulates transcription of genes involved in WNT signaling	RUNX1;FOXP3	sulfotransferases	KIRC
TOTAL	261	4	0.0177322	0.00144017	0.018886	830	0	0.0498952	1047	4	132	123	0.0100679	Transcriptional regulation by RUNX1	RUNX1;FOXP3;RUNX1;FOXP3	sulfotransferases	KIRC
TOTAL	118	3	0.00801685	0.00145277	0.018886	378	0	0.022398	470	3	47	4	0.00358478	Transcriptional regulation by RUNX3	RUNX1;RUNX1	sulfotransferases	KIRC
TOTAL	32	2	0.00217406	0.00172066	0.0189272	137	0	0.00781548	164	2	19	18	0.00144916	Regulation of RUNX1 Expression and Activity	RUNX1;RUNX1	sulfotransferases	KIRC
TOTAL	36	2	0.00244582	0.00216751	0.0195076	73	0	0.00500381	105	2	22	2	0.00167798	NOTCH3 Intracellular Domain Regulates Transcription	HEYL;HEYL	sulfotransferases	KIRC
TOTAL	57	2	0.00387255	0.00530169	0.0297955	247	0	0.0138677	291	2	18	2	0.00137289	NOTCH1 Intracellular Domain Regulates Transcription	HEYL;HEYL	sulfotransferases	KIRC
TOTAL	63	2	0.00428018	0.00643125	0.0297955	190	0	0.0118185	248	2	37	2	0.00282206	Signaling by NOTCH3	HEYL;HEYL	sulfotransferases	KIRC
TOTAL	68	2	0.00461988	0.00744888	0.0297955	212	0	0.0128193	269	2	21	2	0.00160171	Constitutive Signaling by NOTCH1 PEST Domain Mutants	HEYL;HEYL	sulfotransferases	KIRC
TOTAL	68	2	0.00461988	0.00744888	0.0297955	212	0	0.0128193	269	2	21	2	0.00160171	Signaling by NOTCH1 HD+PEST Domain Mutants in Cancer	HEYL;HEYL	sulfotransferases	KIRC
TOTAL	68	2	0.00461988	0.00744888	0.0297955	212	0	0.0128193	269	2	21	2	0.00160171	Signaling by NOTCH1 PEST Domain Mutants in Cancer	HEYL;HEYL	sulfotransferases	KIRC
TOTAL	68	2	0.00461988	0.00744888	0.0297955	212	0	0.0128193	269	2	21	2	0.00160171	Constitutive Signaling by NOTCH1 HD+PEST Domain Mutants	HEYL;HEYL	sulfotransferases	KIRC
TOTAL	68	2	0.00461988	0.00744888	0.0297955	212	0	0.0128193	269	2	39	2	0.0029746	Signaling by NOTCH1 in Cancer	HEYL;HEYL	sulfotransferases	KIRC
TOTAL	84	2	0.00570691	0.011156	0.0381579	280	0	0.0165841	348	2	39	2	0.0029746	Signaling by NOTCH1	HEYL;HEYL	sulfotransferases	KIRC
TOTAL	6	1	0.000407636	0.0113512	0.0381579	18	0	0.00109607	23	1	2	1	0.000152544	RUNX2 regulates genes involved in differentiation of myeloid cells	RUNX1	sulfotransferases	KIRC
TOTAL	258	3	0.0175284	0.0127193	0.0381579	670	0	0.0421273	884	3	154	6	0.0117459	Signaling by NOTCH	RUNX1;HEYL;HEYL	sulfotransferases	KIRC
TOTAL	7	1	0.000475576	0.013231	0.0396929	5	0	0.000571864	12	1	5	5	0.000381359	RUNX1 regulates transcription of genes involved in interleukin signaling	RUNX1	sulfotransferases	KIRC
TOTAL	7	1	0.000475576	0.013231	0.0396929	74	0	0.00381243	80	1	4	4	0.000305087	RUNX1 regulates transcription of genes involved in BCR signaling	RUNX1	sulfotransferases	KIRC
TOTAL	8	1	0.000543515	0.0151073	0.0414312	50	0	0.00276401	58	1	6	6	0.000457631	RUNX1 regulates expression of components of tight junctions	RUNX1	sulfotransferases	KIRC
TOTAL	10	1	0.000679394	0.0188496	0.0414312	95	0	0.0049085	103	1	8	7	0.000610175	RUNX1 regulates estrogen receptor mediated transcription	RUNX1	sulfotransferases	KIRC
TOTAL	11	1	0.000747333	0.0207156	0.0414312	55	0	0.0030976	65	1	7	7	0.000533903	RUNX1 regulates transcription of genes involved in differentiation of myeloid cells	RUNX1	sulfotransferases	KIRC
TOTAL	11	1	0.000747333	0.0207156	0.0414312	22	0	0.00157263	33	1	8	6	0.000610175	RUNX1 regulates transcription of genes involved in differentiation of keratinocytes	RUNX1	sulfotransferases	KIRC
TOTAL	16	1	0.00108703	0.0299944	0.0599887	98	0	0.0053374	112	1	8	2	0.000610175	RUNX3 regulates p14-ARF	RUNX1	sulfotransferases	KIRC
TOTAL	23	1	0.00156261	0.0428424	0.0856847	60	0	0.00390774	82	1	6	1	0.000457631	RHO GTPases activate CIT	MYH11	sulfotransferases	KIRC
TOTAL	26	1	0.00176642	0.0482983	0.0949554	38	0	0.00300229	63	1	7	2	0.000533903	RHO GTPases Activate ROCKs	MYH11	sulfotransferases	KIRC
TOTAL	26	1	0.00176642	0.0482983	0.0949554	33	0	0.00271636	57	1	7	1	0.000533903	Sema4D induced cell migration and growth-cone collapse	MYH11	sulfotransferases	KIRC
TOTAL	27	1	0.00183436	0.0501102	0.0949554	71	0	0.00443195	93	1	15	3	0.00114408	RHO GTPases activate PAKs	MYH11	sulfotransferases	KIRC
TOTAL	32	1	0.00217406	0.0591203	0.0949554	33	0	0.00300229	63	1	13	1	0.000991534	Sema4D in semaphorin signaling	MYH11	sulfotransferases	KIRC
TOTAL	33	1	0.002242	0.0609124	0.0949554	34	0	0.0030976	65	1	4	1	0.000305087	EPHA-mediated growth cone collapse	MYH11	sulfotransferases	KIRC
TOTAL	39	1	0.00264964	0.071596	0.0949554	59	0	0.0044796	94	1	5	5	0.000381359	RUNX1 interacts with co-factors whose precise effect on RUNX1 targets is not known	RUNX1	sulfotransferases	KIRC
TOTAL	39	1	0.00264964	0.071596	0.0949554	11	0	0.00238277	50	1	9	1	0.000686446	Organic cation transport	RUNX1	sulfotransferases	KIRC
TOTAL	51	1	0.00346491	0.0926127	0.0949554	12	0	0.00300229	63	1	12	1	0.000915262	Organic cation/anion/zwitterion transport	RUNX1	sulfotransferases	KIRC
TOTAL	1693	6	0.115021	0.0949554	0.0949554	3857	0	0.239802	5032	6	885	132	0.0675006	RNA Polymerase II Transcription	RUNX1;FOXP3;RUNX1;ELL2;FOXP3	sulfotransferases	KIRC
TOTAL	55	1	0.00373667	0.0995158	0.0995158	94	0	0.00700534	147	1	11	4	0.00083899	Smooth Muscle Contraction	MYH11	sulfotransferases	KIRC
TOTAL	42	2	0.00285345	0.00233826	0.0210444	114	0	0.00724361	152	2	20	2	0.00152544	BMAL1:CLOCK,NPAS2 activates circadian gene expression	PPARA;PPARA	P1PK blood group	KIRP
TOTAL	86	2	0.00584279	0.00936674	0.0562004	27	0	0.00509912	107	2	2	2	0.000152544	Nuclear Receptor transcription pathway	HNF4A;PPARA	P1PK blood group	KIRP
TOTAL	104	2	0.0070657	0.0134455	0.0672277	437	0	0.0246378	517	2	59	4	0.00450004	Circadian Clock	PPARA;PPARA	P1PK blood group	KIRP
TOTAL	20	1	0.00135879	0.0334215	0.0832157	375	0	0.018252	383	1	11	1	0.00083899	SUMOylation of transcription factors	MITF	P1PK blood group	KIRP
TOTAL	174	2	0.0118215	0.0350192	0.0832157	363	0	0.0250191	525	2	41	41	0.00312715	PPARA activates gene expression	PPARA;PPARA	P1PK blood group	KIRP
TOTAL	176	2	0.0119573	0.0357554	0.0832157	393	0	0.0262581	551	2	44	44	0.00335596	Regulation of lipid metabolism by PPARalpha	PPARA;PPARA	P1PK blood group	KIRP
TOTAL	183	2	0.0124329	0.0383795	0.0832157	1665	0	0.0836352	1755	2	131	2	0.00999161	SUMO E3 ligases SUMOylate target proteins	MITF;PPARA	P1PK blood group	KIRP
TOTAL	25	1	0.00169848	0.0416078	0.0832157	56	0	0.00386008	81	1	4	1	0.000305087	RORA activates gene expression	PPARA	P1PK blood group	KIRP
TOTAL	192	2	0.0130444	0.0418593	0.0837186	1702	0	0.0854937	1794	2	140	2	0.0106781	SUMOylation	MITF;PPARA	P1PK blood group	KIRP
TOTAL	16	2	0.00108703	0.000221602	0.00552204	11	0	0.00119138	25	2	7	4	0.000533903	RUNX3 regulates NOTCH signaling	HES1;HES1	Gangliosides	KIRP
TOTAL	16	2	0.00108703	0.000221602	0.00552204	76	0	0.00424133	89	2	9	2	0.000686446	NOTCH2 intracellular domain regulates transcription	HES1;HES1	Gangliosides	KIRP
TOTAL	20	2	0.00135879	0.000345127	0.00552204	21	0	0.00195387	41	2	4	2	0.000305087	Regulation of gene expression in late stage (branching morphogenesis) pancreatic bud precursor cells	HES1;HES1	Gangliosides	KIRP
TOTAL	26	2	0.00176642	0.000580422	0.00696507	100	0	0.0057663	121	2	9	1	0.000686446	NOTCH4 Intracellular Domain Regulates Transcription	HES1;HES1	Gangliosides	KIRP
TOTAL	36	2	0.00244582	0.00110374	0.00982229	73	0	0.00500381	105	2	22	3	0.00167798	NOTCH3 Intracellular Domain Regulates Transcription	HES1;HES1	Gangliosides	KIRP
TOTAL	38	2	0.0025817	0.00122779	0.00982229	81	0	0.00552802	116	2	20	2	0.00152544	Signaling by NOTCH2	HES1;HES1	Gangliosides	KIRP
TOTAL	57	2	0.00387255	0.00272016	0.0115107	247	0	0.0138677	291	2	18	3	0.00137289	NOTCH1 Intracellular Domain Regulates Transcription	HES1;HES1	Gangliosides	KIRP
TOTAL	63	2	0.00428018	0.0033068	0.0115107	190	0	0.0118185	248	2	37	3	0.00282206	Signaling by NOTCH3	HES1;HES1	Gangliosides	KIRP
TOTAL	67	2	0.00455194	0.00372791	0.0115107	149	0	0.0101029	212	2	26	2	0.00198307	Regulation of beta-cell development	HES1;HES1	Gangliosides	KIRP
TOTAL	68	2	0.00461988	0.0038369	0.0115107	212	0	0.0128193	269	2	21	2	0.00160171	Signaling by NOTCH1 HD+PEST Domain Mutants in Cancer	HES1;HES1	Gangliosides	KIRP
TOTAL	68	2	0.00461988	0.0038369	0.0115107	212	0	0.0128193	269	2	21	2	0.00160171	Constitutive Signaling by NOTCH1 PEST Domain Mutants	HES1;HES1	Gangliosides	KIRP
TOTAL	68	2	0.00461988	0.0038369	0.0115107	212	0	0.0128193	269	2	21	2	0.00160171	Signaling by NOTCH1 PEST Domain Mutants in Cancer	HES1;HES1	Gangliosides	KIRP
TOTAL	68	2	0.00461988	0.0038369	0.0115107	212	0	0.0128193	269	2	21	2	0.00160171	Constitutive Signaling by NOTCH1 HD+PEST Domain Mutants	HES1;HES1	Gangliosides	KIRP
TOTAL	68	2	0.00461988	0.0038369	0.0115107	212	0	0.0128193	269	2	39	2	0.0029746	Signaling by NOTCH1 in Cancer	HES1;HES1	Gangliosides	KIRP
TOTAL	84	2	0.00570691	0.00577935	0.0137755	280	0	0.0165841	348	2	39	3	0.0029746	Signaling by NOTCH1	HES1;HES1	Gangliosides	KIRP
TOTAL	87	2	0.00591073	0.00618445	0.0137755	193	0	0.0127716	268	2	32	5	0.0024407	Transcriptional activation of mitochondrial biogenesis	ESRRA;ESRRA	Gangliosides	KIRP
TOTAL	92	2	0.00625042	0.00688773	0.0137755	183	0	0.0126763	266	2	20	1	0.00152544	Signaling by NOTCH4	HES1;HES1	Gangliosides	KIRP
TOTAL	118	2	0.00801685	0.0110946	0.0221891	378	0	0.022398	470	2	47	4	0.00358478	Transcriptional regulation by RUNX3	HES1;HES1	Gangliosides	KIRP
TOTAL	127	2	0.0086283	0.0127581	0.0255163	324	0	0.0206348	433	2	36	5	0.00274579	Mitochondrial biogenesis	ESRRA;ESRRA	Gangliosides	KIRP
TOTAL	147	2	0.00998709	0.0168184	0.0336368	485	0	0.0289268	607	2	84	4	0.00640683	Transcriptional regulation by RUNX2	HES1;ESRRA	Gangliosides	KIRP
TOTAL	15	1	0.00101909	0.0201857	0.0403714	104	0	0.00543271	114	1	5	3	0.000381359	ATF6 (ATF6-alpha) activates chaperone genes	NFYC	Gangliosides	KIRP
TOTAL	17	1	0.00115497	0.0228477	0.0451989	104	0	0.00552802	116	1	10	3	0.000762718	ATF6 (ATF6-alpha) activates chaperones	NFYC	Gangliosides	KIRP
TOTAL	174	2	0.0118215	0.0230554	0.0451989	363	0	0.0250191	525	2	41	4	0.00312715	PPARA activates gene expression	NFYC;ESRRA	Gangliosides	KIRP
TOTAL	176	2	0.0119573	0.0235503	0.0451989	393	0	0.0262581	551	2	44	4	0.00335596	Regulation of lipid metabolism by PPARalpha	NFYC;ESRRA	Gangliosides	KIRP
TOTAL	23	1	0.00156261	0.0307925	0.0451989	153	0	0.00824438	173	1	15	3	0.00114408	FOXO-mediated transcription of cell death genes	NFYC	Gangliosides	KIRP
TOTAL	34	1	0.00230994	0.0451989	0.0451989	80	0	0.00519443	109	1	7	1	0.000533903	ATF4 activates genes in response to endoplasmic reticulum stress	NFYC	Gangliosides	KIRP
TOTAL	34	1	0.00230994	0.0451989	0.0451989	210	0	0.0115326	242	1	24	1	0.00183052	RUNX2 regulates osteoblast differentiation	HES1	Gangliosides	KIRP
TOTAL	258	2	0.0175284	0.0473723	0.0473723	670	0	0.0421273	884	2	154	9	0.0117459	Signaling by NOTCH	HES1;HES1	Gangliosides	KIRP
TOTAL	42	1	0.00285345	0.0555482	0.0555482	82	0	0.00557568	117	1	11	1	0.00083899	PERK regulates gene expression	NFYC	Gangliosides	KIRP
TOTAL	43	1	0.00292139	0.0568344	0.0568344	246	0	0.0134388	282	1	32	1	0.0024407	RUNX2 regulates bone development	HES1	Gangliosides	KIRP
TOTAL	335	2	0.0227597	0.0750874	0.0750874	749	0	0.0470358	987	2	86	5	0.00655938	Organelle biogenesis and maintenance	ESRRA;ESRRA	Gangliosides	KIRP
TOTAL	70	1	0.00475576	0.0909381	0.0909381	126	0	0.00910217	191	1	42	30	0.00320342	Activation of gene expression by SREBF (SREBP)	NFYC	Gangliosides	KIRP
TOTAL	3	1	0.000203818	0.00162938	0.0488815	0	0	0.000142966	3	1	1	1	7.62718e-05	TCF7L2 mutants don't bind CTBP	CTBP1	Dolichol Pathway	KIRP
TOTAL	16	1	0.00108703	0.00866323	0.0869271	252	0	0.0127716	268	1	7	2	0.000533903	Repression of WNT target genes	CTBP1	Dolichol Pathway	KIRP
TOTAL	17	1	0.00115497	0.00920249	0.0869271	33	0	0.00233511	49	1	3	1	0.000228815	Chylomicron remodeling	HBP1	Dolichol Pathway	KIRP
TOTAL	30	1	0.00203818	0.0161896	0.0869271	35	0	0.0030976	65	1	12	3	0.000915262	Assembly of active LPL and LIPC lipase complexes	HBP1	Dolichol Pathway	KIRP
TOTAL	39	1	0.00264964	0.0210016	0.0869271	135	0	0.00786313	165	1	16	1	0.00122035	Signaling by WNT in cancer	CTBP1	Dolichol Pathway	KIRP
TOTAL	44	1	0.00298933	0.0236659	0.0869271	445	0	0.022398	470	1	14	2	0.00106781	Deactivation of the beta-catenin transactivating complex	CTBP1	Dolichol Pathway	KIRP
TOTAL	44	1	0.00298933	0.0236659	0.0869271	423	0	0.0212543	446	1	27	2	0.00205934	SUMOylation of transcription cofactors	CTBP1	Dolichol Pathway	KIRP
TOTAL	54	1	0.00366873	0.0289757	0.0869271	84	0	0.00638582	134	1	30	4	0.00228815	Plasma lipoprotein remodeling	HBP1	Dolichol Pathway	KIRP
TOTAL	79	1	0.00536721	0.0421397	0.0952411	38	0	0.0053374	112	1	28	1	0.00213561	Retinoid metabolism and transport	HBP1	Dolichol Pathway	KIRP
TOTAL	91	1	0.00618249	0.0484028	0.0952411	574	0	0.030976	650	1	23	2	0.00175425	Degradation of beta-catenin by the destruction complex	CTBP1	Dolichol Pathway	KIRP
TOTAL	94	1	0.0063863	0.0499629	0.0952411	124	0	0.0101029	212	1	34	1	0.00259324	Metabolism of fat-soluble vitamins	HBP1	Dolichol Pathway	KIRP
TOTAL	98	1	0.00665806	0.0520396	0.0952411	192	0	0.0132005	277	1	84	4	0.00640683	Plasma lipoprotein assembly, remodeling, and clearance	HBP1	Dolichol Pathway	KIRP
TOTAL	115	1	0.00781303	0.0608215	0.0952411	10	0	0.00595692	125	1	16	1	0.00122035	Post-translational modification: synthesis of GPI-anchored proteins	HBP1	Dolichol Pathway	KIRP
TOTAL	169	1	0.0114818	0.0882464	0.0952411	127	0	0.0137247	288	1	92	1	0.00701701	Visual phototransduction	HBP1	Dolichol Pathway	KIRP
TOTAL	183	1	0.0124329	0.0952411	0.0952411	1665	0	0.0836352	1755	1	131	2	0.00999161	SUMO E3 ligases SUMOylate target proteins	CTBP1	Dolichol Pathway	KIRP
TOTAL	192	1	0.0130444	0.0997129	0.0997129	1702	0	0.0854937	1794	1	140	2	0.0106781	SUMOylation	CTBP1	Dolichol Pathway	KIRP
TOTAL	45	3	0.00305727	6.15826e-06	0.000443395	227	0	0.0127716	268	3	35	6	0.00266951	Transcriptional regulation of pluripotent stem cells	STAT3;STAT3;KLF4	N-glycan branching	KIRP
TOTAL	21	2	0.00142673	0.000133075	0.00479069	130	0	0.00700534	147	2	16	2	0.00122035	POU5F1 (OCT4), SOX2, NANOG activate genes related to proliferation	STAT3;STAT3	N-glycan branching	KIRP
TOTAL	27	2	0.00183436	0.000219384	0.00526521	176	0	0.00957873	201	2	22	2	0.00167798	FOXO-mediated transcription of cell cycle genes	KLF4;KLF4	N-glycan branching	KIRP
TOTAL	110	2	0.00747333	0.00350705	0.046142	494	0	0.0277831	583	2	85	2	0.00648311	FOXO-mediated transcription	KLF4;KLF4	N-glycan branching	KIRP
TOTAL	5	1	0.000339697	0.00406876	0.046142	83	0	0.00414602	87	1	4	4	0.000305087	MET activates STAT3	STAT3	N-glycan branching	KIRP
TOTAL	5	1	0.000339697	0.00406876	0.046142	83	0	0.00414602	87	1	1	1	7.62718e-05	Signalling to STAT3	STAT3	N-glycan branching	KIRP
TOTAL	6	1	0.000407636	0.00488068	0.046142	3	0	0.000428898	9	1	3	3	0.000228815	p75NTR negatively regulates cell cycle via SC1	PRDM4	N-glycan branching	KIRP
TOTAL	7	1	0.000475576	0.00569201	0.046142	124	0	0.00614754	129	1	9	6	0.000686446	PTK6 Activates STAT3	STAT3	N-glycan branching	KIRP
TOTAL	11	1	0.000747333	0.00893123	0.046142	136	0	0.00676706	142	1	12	6	0.000915262	Interleukin-23 signaling	STAT3	N-glycan branching	KIRP
TOTAL	11	1	0.000747333	0.00893123	0.046142	60	0	0.00300229	63	1	4	1	0.000305087	BH3-only proteins associate with and inactivate anti-apoptotic BCL-2 members	STAT3	N-glycan branching	KIRP
TOTAL	12	1	0.000815273	0.00973952	0.046142	1	0	0.00061952	13	1	5	2	0.000381359	Interleukin-21 signaling	STAT3	N-glycan branching	KIRP
TOTAL	13	1	0.000883212	0.0105472	0.046142	125	0	0.00652878	137	1	19	5	0.00144916	Signaling by Leptin	STAT3	N-glycan branching	KIRP
TOTAL	13	1	0.000883212	0.0105472	0.046142	192	0	0.00953107	200	1	20	5	0.00152544	Interleukin-27 signaling	STAT3	N-glycan branching	KIRP
TOTAL	16	1	0.00108703	0.0129667	0.046142	129	0	0.00676706	142	1	13	5	0.000991534	Interleukin-9 signaling	STAT3	N-glycan branching	KIRP
TOTAL	16	1	0.00108703	0.0129667	0.046142	335	0	0.0162028	340	1	17	5	0.00129662	Interleukin-15 signaling	STAT3	N-glycan branching	KIRP
TOTAL	16	1	0.00108703	0.0129667	0.046142	174	0	0.00876859	184	1	26	3	0.00198307	Interleukin-35 Signalling	STAT3	N-glycan branching	KIRP
TOTAL	18	1	0.00122291	0.0145766	0.046142	109	0	0.00586161	123	1	20	6	0.00152544	Interleukin-6 signaling	STAT3	N-glycan branching	KIRP
TOTAL	19	1	0.00129085	0.0153807	0.046142	119	0	0.00648113	136	1	7	1	0.000533903	Signaling by PDGFRA transmembrane, juxtamembrane and kinase domain mutants	STAT3	N-glycan branching	KIRP
TOTAL	19	1	0.00129085	0.0153807	0.046142	119	0	0.00648113	136	1	7	1	0.000533903	Signaling by PDGFRA extracellular domain mutants	STAT3	N-glycan branching	KIRP
TOTAL	26	1	0.00176642	0.0209924	0.0499655	18	0	0.00204918	43	1	8	1	0.000610175	Synthesis, secretion, and deacylation of Ghrelin	KLF4	N-glycan branching	KIRP
TOTAL	26	1	0.00176642	0.0209924	0.0499655	163	0	0.0088639	186	1	14	1	0.00106781	Signaling by cytosolic FGFR1 fusion mutants	STAT3	N-glycan branching	KIRP
TOTAL	28	1	0.0019023	0.0225903	0.0499655	127	0	0.00724361	152	1	11	4	0.00083899	Signaling by phosphorylated juxtamembrane, extracellular and kinase domain KIT mutants	STAT3	N-glycan branching	KIRP
TOTAL	29	1	0.00197024	0.0233884	0.0499655	183	0	0.00962638	202	1	56	26	0.00427122	Interleukin-20 family signaling	STAT3	N-glycan branching	KIRP
TOTAL	29	1	0.00197024	0.0233884	0.0499655	105	0	0.00609989	128	1	28	2	0.00213561	Growth hormone receptor signaling	STAT3	N-glycan branching	KIRP
TOTAL	31	1	0.00210612	0.0249827	0.0499655	135	0	0.00748189	157	1	34	6	0.00259324	Interleukin-6 family signaling	STAT3	N-glycan branching	KIRP
TOTAL	36	1	0.00244582	0.0289582	0.0563731	148	0	0.00848265	178	1	26	3	0.00198307	Interleukin-7 signaling	STAT3	N-glycan branching	KIRP
TOTAL	36	1	0.00244582	0.0289582	0.0563731	180	0	0.0101029	212	1	14	1	0.00106781	Interleukin-37 signaling	STAT3	N-glycan branching	KIRP
TOTAL	37	1	0.00251376	0.0297515	0.0563731	288	0	0.0148208	311	1	16	1	0.00122035	Downstream signal transduction	STAT3	N-glycan branching	KIRP
TOTAL	40	1	0.00271758	0.0321279	0.0563731	3	0	0.00204918	43	1	2	1	0.000152544	Association of TriC/CCT with target proteins during biosynthesis	STAT3	N-glycan branching	KIRP
TOTAL	42	1	0.00285345	0.0337091	0.0563731	128	0	0.0080061	168	1	24	2	0.00183052	Signaling by PDGFR in disease	STAT3	N-glycan branching	KIRP
TOTAL	43	1	0.00292139	0.0344989	0.0563731	127	0	0.00795844	167	1	26	4	0.00198307	Signaling by KIT in disease	STAT3	N-glycan branching	KIRP
TOTAL	48	1	0.00326109	0.0384388	0.0563731	166	0	0.0100076	210	1	25	1	0.0019068	FGFR1 mutant receptor activation	STAT3	N-glycan branching	KIRP
TOTAL	52	1	0.00353285	0.0415801	0.0563731	405	0	0.0205395	431	1	59	12	0.00450004	Interleukin-2 family signaling	STAT3	N-glycan branching	KIRP
TOTAL	58	1	0.00394049	0.0462744	0.0563731	221	0	0.0129146	271	1	35	1	0.00266951	Signaling by FGFR1 in disease	STAT3	N-glycan branching	KIRP
TOTAL	61	1	0.0041443	0.0486136	0.0563731	262	0	0.0138201	290	1	62	1	0.00472885	Intrinsic Pathway for Apoptosis	STAT3	N-glycan branching	KIRP
TOTAL	66	1	0.004484	0.0525006	0.0563731	260	0	0.0147255	309	1	39	4	0.0029746	Signaling by SCF-KIT	STAT3	N-glycan branching	KIRP
TOTAL	71	1	0.0048237	0.0563731	0.0563731	333	0	0.0186809	392	1	27	4	0.00205934	Transcriptional regulation of granulopoiesis	STAT3	N-glycan branching	KIRP
TOTAL	71	1	0.0048237	0.0563731	0.0563731	692	0	0.0352173	739	1	53	6	0.00404241	Signaling by PTK6	STAT3	N-glycan branching	KIRP
TOTAL	71	1	0.0048237	0.0563731	0.0563731	692	0	0.0352173	739	1	53	6	0.00404241	Signaling by Non-Receptor Tyrosine Kinases	STAT3	N-glycan branching	KIRP
TOTAL	86	1	0.00584279	0.0679036	0.0679036	91	0	0.00824438	173	1	15	6	0.00114408	Interleukin-10 signaling	STAT3	N-glycan branching	KIRP
TOTAL	86	1	0.00584279	0.0679036	0.0679036	302	0	0.0176801	371	1	31	1	0.00236443	Signaling by PDGF	STAT3	N-glycan branching	KIRP
TOTAL	88	1	0.00597867	0.0694313	0.0694313	402	0	0.0223504	469	1	49	4	0.00373732	Signaling by MET	STAT3	N-glycan branching	KIRP
TOTAL	91	1	0.00618249	0.0717184	0.0717184	47	0	0.00648113	136	1	22	1	0.00167798	Senescence-Associated Secretory Phenotype (SASP)	STAT3	N-glycan branching	KIRP
TOTAL	1243	3	0.0844487	0.0743661	0.0743661	2923	0	0.182377	3827	3	538	11	0.0410342	Developmental Biology	STAT3;STAT3;KLF4	N-glycan branching	KIRP
TOTAL	95	1	0.00645424	0.0747598	0.0747598	226	0	0.0147255	309	1	106	1	0.00808481	Signaling by FGFR in disease	STAT3	N-glycan branching	KIRP
TOTAL	96	1	0.00652218	0.0755188	0.0755188	597	0	0.032215	676	1	114	14	0.00869499	Interleukin-12 family signaling	STAT3	N-glycan branching	KIRP
TOTAL	100	1	0.00679394	0.0785488	0.0785488	81	0	0.00853031	179	1	19	1	0.00144916	Chaperonin-mediated protein folding	STAT3	N-glycan branching	KIRP
TOTAL	106	1	0.00720158	0.0830768	0.0830768	91	0	0.00929279	195	1	28	1	0.00213561	Protein folding	STAT3	N-glycan branching	KIRP
TOTAL	108	1	0.00733745	0.0845816	0.0845816	414	0	0.0236847	497	1	18	1	0.00137289	Transcriptional regulation of white adipocyte differentiation	KLF4	N-glycan branching	KIRP
TOTAL	109	1	0.00740539	0.0853332	0.0853332	422	0	0.0242566	509	1	50	3	0.00381359	p75 NTR receptor-mediated signalling	PRDM4	N-glycan branching	KIRP
TOTAL	116	3	0.00788097	0.000131949	0.00118754	632	0	0.0350267	735	3	43	5	0.00327969	Activation of anterior HOX genes in hindbrain development during early embryogenesis	HOXA2;HOXA2	CS-DS extension	KIRP
TOTAL	116	3	0.00788097	0.000131949	0.00118754	632	0	0.0350267	735	3	43	5	0.00327969	Activation of HOX genes during differentiation	HOXA2;HOXA2	CS-DS extension	KIRP
TOTAL	42	2	0.00285345	0.000621944	0.00373166	114	0	0.00724361	152	2	20	2	0.00152544	BMAL1:CLOCK,NPAS2 activates circadian gene expression	BHLHE40;BHLHE40	CS-DS extension	KIRP
TOTAL	104	2	0.0070657	0.00369756	0.0147903	437	0	0.0246378	517	2	59	2	0.00450004	Circadian Clock	BHLHE40;BHLHE40	CS-DS extension	KIRP
TOTAL	1243	4	0.0844487	0.0195348	0.0586044	2923	0	0.182377	3827	4	538	9	0.0410342	Developmental Biology	HOXA2;HOXA2;FLI1	CS-DS extension	KIRP
TOTAL	10	2	0.000679394	3.5824e-05	0.000286592	157	0	0.00791079	166	2	4	2	0.000305087	Binding of TCF/LEF:CTNNB1 to target gene promoters	MYC;MYC	sialylation	KIRP
TOTAL	10	2	0.000679394	3.5824e-05	0.000286592	141	0	0.00700534	147	2	5	2	0.000381359	RUNX3 regulates WNT signaling	MYC;MYC	sialylation	KIRP
TOTAL	258	4	0.0175284	5.94575e-05	0.000416202	670	0	0.0421273	884	4	154	11	0.0117459	Signaling by NOTCH	HES1;HES1;MYC;MYC	sialylation	KIRP
TOTAL	16	2	0.00108703	9.14358e-05	0.000548615	11	0	0.00119138	25	2	7	4	0.000533903	RUNX3 regulates NOTCH signaling	HES1;HES1	sialylation	KIRP
TOTAL	16	2	0.00108703	9.14358e-05	0.000548615	252	0	0.0127716	268	2	7	4	0.000533903	Repression of WNT target genes	MYC	sialylation	KIRP
TOTAL	16	2	0.00108703	9.14358e-05	0.000548615	76	0	0.00424133	89	2	9	2	0.000686446	NOTCH2 intracellular domain regulates transcription	HES1;HES1	sialylation	KIRP
TOTAL	20	2	0.00135879	0.000142584	0.00071292	21	0	0.00195387	41	2	4	2	0.000305087	Regulation of gene expression in late stage (branching morphogenesis) pancreatic bud precursor cells	HES1;HES1	sialylation	KIRP
TOTAL	26	2	0.00176642	0.000240248	0.00120124	100	0	0.0057663	121	2	9	1	0.000686446	NOTCH4 Intracellular Domain Regulates Transcription	HES1;HES1	sialylation	KIRP
TOTAL	36	2	0.00244582	0.000458306	0.00183322	73	0	0.00500381	105	2	22	3	0.00167798	NOTCH3 Intracellular Domain Regulates Transcription	HES1;HES1	sialylation	KIRP
TOTAL	38	2	0.0025817	0.000510135	0.00204054	81	0	0.00552802	116	2	20	2	0.00152544	Signaling by NOTCH2	HES1;HES1	sialylation	KIRP
TOTAL	39	2	0.00264964	0.000537069	0.00214828	353	0	0.0182043	382	2	17	1	0.00129662	SMAD2/SMAD3:SMAD4 heterotrimer regulates transcription	MYC;MYC	sialylation	KIRP
TOTAL	501	4	0.0340376	0.000749467	0.00299787	1037	0	0.0676706	1420	4	396	4	0.0302036	Diseases of signal transduction by growth factor receptors and second messengers	HES1;HES1;MYC;MYC	sialylation	KIRP
TOTAL	55	2	0.00373667	0.00105966	0.00317898	523	0	0.026544	557	2	38	1	0.00289833	Transcriptional activity of SMAD2/SMAD3:SMAD4 heterotrimer	MYC;MYC	sialylation	KIRP
TOTAL	63	2	0.00428018	0.00138482	0.00415445	190	0	0.0118185	248	2	37	3	0.00282206	Signaling by NOTCH3	HES1;HES1	sialylation	KIRP
TOTAL	67	2	0.00455194	0.00156313	0.0046894	590	0	0.0302135	634	2	13	3	0.000991534	Formation of the beta-catenin:TCF transactivating complex	MYC;MYC	sialylation	KIRP
TOTAL	67	2	0.00455194	0.00156313	0.0046894	149	0	0.0101029	212	2	26	2	0.00198307	Regulation of beta-cell development	HES1;HES1	sialylation	KIRP
TOTAL	71	2	0.0048237	0.00175186	0.00498681	333	0	0.0186809	392	2	27	4	0.00205934	Transcriptional regulation of granulopoiesis	MYC;MYC	sialylation	KIRP
TOTAL	81	2	0.00550309	0.00226877	0.00498681	146	0	0.0106271	223	2	27	2	0.00205934	Ca2+ pathway	MYC	sialylation	KIRP
TOTAL	85	2	0.00577485	0.00249341	0.00498681	683	0	0.0352173	739	2	82	1	0.00625429	Signaling by TGF-beta Receptor Complex	MYC;MYC	sialylation	KIRP
TOTAL	332	3	0.0225559	0.00276973	0.00553946	1509	0	0.0837781	1758	3	157	9	0.0119747	Signaling by WNT	MYC;MYC	sialylation	KIRP
TOTAL	91	2	0.00618249	0.00284932	0.00569864	574	0	0.030976	650	2	23	4	0.00175425	Degradation of beta-catenin by the destruction complex	MYC	sialylation	KIRP
TOTAL	92	2	0.00625042	0.00291084	0.00582167	183	0	0.0126763	266	2	20	1	0.00152544	Signaling by NOTCH4	HES1;HES1	sialylation	KIRP
TOTAL	106	2	0.00720158	0.00383732	0.00767465	357	0	0.021159	444	2	40	3	0.00305087	MAPK6/MAPK4 signaling	MYC;MYC	sialylation	KIRP
TOTAL	114	2	0.00774509	0.00442077	0.00884154	756	0	0.0397446	834	2	107	1	0.00816109	Signaling by TGFB family members	MYC;MYC	sialylation	KIRP
TOTAL	6	1	0.000407636	0.00528633	0.0105727	168	0	0.00829203	174	1	4	3	0.000305087	TFAP2 (AP-2) family regulates transcription of cell cycle factors	MYC	sialylation	KIRP
TOTAL	154	2	0.0104627	0.0079084	0.0150859	847	0	0.0461304	968	2	66	8	0.00503394	Estrogen-dependent gene expression	MYC;MYC	sialylation	KIRP
TOTAL	1554	5	0.105578	0.00814377	0.0150859	3712	0	0.22927	4811	5	824	14	0.062848	Generic Transcription Pathway	HES1;HES1;MYC;NFYC;MYC	sialylation	KIRP
TOTAL	166	2	0.0112779	0.00913424	0.0150859	346	0	0.0237324	498	2	51	2	0.00388986	Beta-catenin independent WNT signaling	MYC	sialylation	KIRP
TOTAL	13	1	0.000883212	0.0114211	0.0150859	7	0	0.000953107	20	1	3	1	0.000228815	Insulin-like Growth Factor-2 mRNA Binding Proteins (IGF2BPs/IMPs/VICKZs) bind RNA	MYC	sialylation	KIRP
TOTAL	1693	5	0.115021	0.0116804	0.0150859	3857	0	0.239802	5032	5	885	14	0.0675006	RNA Polymerase II Transcription	HES1;HES1;MYC;NFYC;MYC	sialylation	KIRP
TOTAL	15	1	0.00101909	0.0131675	0.0150859	104	0	0.00543271	114	1	5	3	0.000381359	ATF6 (ATF6-alpha) activates chaperone genes	NFYC	sialylation	KIRP
TOTAL	17	1	0.00115497	0.014911	0.0150859	104	0	0.00552802	116	1	10	3	0.000762718	ATF6 (ATF6-alpha) activates chaperones	NFYC	sialylation	KIRP
TOTAL	216	2	0.0146749	0.0150859	0.0150859	1129	0	0.0610465	1281	2	71	3	0.0054153	TCF dependent signaling in response to WNT	MYC;MYC	sialylation	KIRP
TOTAL	216	2	0.0146749	0.0150859	0.0150859	143	0	0.0165364	347	2	47	1	0.00358478	Interleukin-4 and Interleukin-13 signaling	MYC;MYC	sialylation	KIRP
TOTAL	1851	5	0.125756	0.0168877	0.0168877	4048	0	0.253241	5314	5	996	14	0.0759667	Gene expression (Transcription)	HES1;HES1;MYC;NFYC;MYC	sialylation	KIRP
TOTAL	1243	4	0.0844487	0.0195348	0.0195348	2923	0	0.182377	3827	4	538	6	0.0410342	Developmental Biology	HES1;HES1;MYC;MYC	sialylation	KIRP
TOTAL	23	1	0.00156261	0.0201245	0.0201245	153	0	0.00824438	173	1	15	3	0.00114408	FOXO-mediated transcription of cell death genes	NFYC	sialylation	KIRP
TOTAL	256	2	0.0173925	0.0207738	0.0207738	1051	0	0.0599028	1257	2	110	8	0.0083899	ESR-mediated signaling	MYC;MYC	sialylation	KIRP
TOTAL	25	1	0.00169848	0.0218567	0.0218567	103	0	0.00595692	125	1	12	1	0.000915262	Transcription of E2F targets under negative control by DREAM complex	MYC	sialylation	KIRP
TOTAL	34	1	0.00230994	0.0296165	0.0296165	80	0	0.00519443	109	1	7	1	0.000533903	ATF4 activates genes in response to endoplasmic reticulum stress	NFYC	sialylation	KIRP
TOTAL	34	1	0.00230994	0.0296165	0.0296165	210	0	0.0115326	242	1	24	1	0.00183052	RUNX2 regulates osteoblast differentiation	HES1	sialylation	KIRP
TOTAL	38	1	0.0025817	0.0330471	0.0330471	284	0	0.0143443	301	1	27	1	0.00205934	G0 and Early G1	MYC	sialylation	KIRP
TOTAL	42	1	0.00285345	0.0364664	0.0364664	82	0	0.00557568	117	1	11	1	0.00083899	PERK regulates gene expression	NFYC	sialylation	KIRP
TOTAL	43	1	0.00292139	0.0373195	0.0373195	246	0	0.0134388	282	1	32	1	0.0024407	RUNX2 regulates bone development	HES1	sialylation	KIRP
TOTAL	385	2	0.0261567	0.0440727	0.0440727	1273	0	0.0759626	1594	2	191	8	0.0145679	Signaling by Nuclear Receptors	MYC;MYC	sialylation	KIRP
TOTAL	52	1	0.00353285	0.044966	0.044966	1025	0	0.0505147	1060	1	44	3	0.00335596	Transcriptional regulation by the AP-2 (TFAP2) family of transcription factors	MYC	sialylation	KIRP
TOTAL	403	2	0.0273796	0.0478615	0.0478615	621	0	0.0457968	961	2	122	3	0.00930516	MAPK family signaling cascades	MYC;MYC	sialylation	KIRP
TOTAL	70	1	0.00475576	0.0600911	0.0600911	126	0	0.00910217	191	1	42	30	0.00320342	Activation of gene expression by SREBF (SREBP)	NFYC	sialylation	KIRP
TOTAL	86	1	0.00584279	0.0733497	0.0733497	158	0	0.011342	238	1	52	30	0.00396614	Regulation of cholesterol biosynthesis by SREBP (SREBF)	NFYC	sialylation	KIRP
TOTAL	88	1	0.00597867	0.0749948	0.0749948	233	0	0.0141536	297	1	20	2	0.00152544	Cyclin E associated events during G1/S transition	MYC	sialylation	KIRP
TOTAL	90	1	0.00611455	0.0766373	0.0766373	182	0	0.0120091	252	1	19	1	0.00144916	Cyclin A:Cdk2-associated events at S phase entry	MYC	sialylation	KIRP
TOTAL	110	1	0.00747333	0.0929142	0.0929142	494	0	0.0277831	583	1	85	3	0.00648311	FOXO-mediated transcription	NFYC	sialylation	KIRP
TOTAL	116	3	0.00788097	0.000207455	0.00373418	632	0	0.0350267	735	3	43	5	0.00327969	Activation of anterior HOX genes in hindbrain development during early embryogenesis	HOXA2;HOXA2	sulfotransferases	KIRP
TOTAL	116	3	0.00788097	0.000207455	0.00373418	632	0	0.0350267	735	3	43	5	0.00327969	Activation of HOX genes during differentiation	HOXA2;HOXA2	sulfotransferases	KIRP
TOTAL	42	2	0.00285345	0.000834058	0.0100087	114	0	0.00724361	152	2	20	2	0.00152544	BMAL1:CLOCK,NPAS2 activates circadian gene expression	BHLHE40;BHLHE40	sulfotransferases	KIRP
TOTAL	104	2	0.0070657	0.00493103	0.0443792	437	0	0.0246378	517	2	59	2	0.00450004	Circadian Clock	BHLHE40;BHLHE40	sulfotransferases	KIRP
TOTAL	20	1	0.00135879	0.0201891	0.0832072	70	0	0.00390774	82	1	8	8	0.000610175	Transcription of E2F targets under negative control by p107 (RBL1) and p130 (RBL2) in complex with HDAC1	E2F4	sulfotransferases	KIRP
TOTAL	21	1	0.00142673	0.0211885	0.0832072	188	0	0.00972169	204	1	11	2	0.00083899	TP53 Regulates Transcription of Genes Involved in G2 Cell Cycle Arrest	E2F4	sulfotransferases	KIRP
TOTAL	25	1	0.00169848	0.0251766	0.0832072	103	0	0.00595692	125	1	12	12	0.000915262	Transcription of E2F targets under negative control by DREAM complex	E2F4	sulfotransferases	KIRP
TOTAL	1243	4	0.0844487	0.0325686	0.0832072	2923	0	0.182377	3827	4	538	9	0.0410342	Developmental Biology	HOXA2;HOXA2;FLI1	sulfotransferases	KIRP
TOTAL	38	1	0.0025817	0.0380334	0.0832072	284	0	0.0143443	301	1	27	24	0.00205934	G0 and Early G1	E2F4	sulfotransferases	KIRP
TOTAL	39	1	0.00264964	0.0390158	0.0832072	353	0	0.0182043	382	1	17	2	0.00129662	SMAD2/SMAD3:SMAD4 heterotrimer regulates transcription	E2F4	sulfotransferases	KIRP
TOTAL	43	1	0.00292139	0.042936	0.0832072	132	0	0.00810141	170	1	28	3	0.00213561	G1/S-Specific Transcription	E2F4	sulfotransferases	KIRP
TOTAL	51	1	0.00346491	0.0507318	0.0832072	72	0	0.00528974	111	1	15	2	0.00114408	G1 Phase	E2F4	sulfotransferases	KIRP
TOTAL	51	1	0.00346491	0.0507318	0.0832072	72	0	0.00528974	111	1	15	2	0.00114408	Cyclin D associated events in G1	E2F4	sulfotransferases	KIRP
TOTAL	55	1	0.00373667	0.0546074	0.0832072	523	0	0.026544	557	1	38	2	0.00289833	Transcriptional activity of SMAD2/SMAD3:SMAD4 heterotrimer	E2F4	sulfotransferases	KIRP
TOTAL	65	1	0.00441606	0.0642319	0.0832072	332	0	0.0178708	375	1	42	2	0.00320342	TP53 Regulates Transcription of Cell Cycle Genes	E2F4	sulfotransferases	KIRP
TOTAL	71	1	0.0048237	0.0699627	0.0832072	333	0	0.0186809	392	1	27	2	0.00205934	Transcriptional regulation of granulopoiesis	FLI1	sulfotransferases	KIRP
TOTAL	85	1	0.00577485	0.0832072	0.0832072	683	0	0.0352173	739	1	82	2	0.00625429	Signaling by TGF-beta Receptor Complex	E2F4	sulfotransferases	KIRP
TOTAL	88	1	0.00597867	0.0860224	0.0860224	233	0	0.0141536	297	1	20	1	0.00152544	Cyclin E associated events during G1/S transition	E2F4	sulfotransferases	KIRP
TOTAL	90	1	0.00611455	0.0878946	0.0878946	182	0	0.0120091	252	1	19	1	0.00144916	Cyclin A:Cdk2-associated events at S phase entry	E2F4	sulfotransferases	KIRP
TOTAL	3	1	0.000203818	0.00325611	0.0934717	0	0	0.000142966	3	1	1	1	7.62718e-05	TCF7L2 mutants don't bind CTBP	CTBP1	CS HS Initiation	LAML
TOTAL	16	1	0.00108703	0.0172514	0.0934717	98	0	0.0053374	112	1	8	6	0.000610175	RUNX3 regulates p14-ARF	BRD2	CS HS Initiation	LAML
TOTAL	16	1	0.00108703	0.0172514	0.0934717	252	0	0.0127716	268	1	7	2	0.000533903	Repression of WNT target genes	CTBP1	CS HS Initiation	LAML
TOTAL	216	2	0.0146749	0.0225446	0.0934717	1129	0	0.0610465	1281	2	71	4	0.0054153	TCF dependent signaling in response to WNT	CTBP1;H2AFX	CS HS Initiation	LAML
TOTAL	34	1	0.00230994	0.0363256	0.0934717	41	0	0.00338353	71	1	2	2	0.000152544	Packaging Of Telomere Ends	H2AFX	CS HS Initiation	LAML
TOTAL	34	1	0.00230994	0.0363256	0.0934717	4	0	0.0018109	38	1	2	1	0.000152544	RNA Polymerase I Promoter Opening	H2AFX	CS HS Initiation	LAML
TOTAL	36	1	0.00244582	0.0384234	0.0934717	25	0	0.00271636	57	1	7	7	0.000533903	DNA methylation	H2AFX	CS HS Initiation	LAML
TOTAL	39	1	0.00264964	0.041562	0.0934717	2	0	0.00195387	41	1	10	2	0.000762718	Recognition and association of DNA glycosylase with site containing an affected purine	H2AFX	CS HS Initiation	LAML
TOTAL	39	1	0.00264964	0.041562	0.0934717	135	0	0.00786313	165	1	16	1	0.00122035	Signaling by WNT in cancer	CTBP1	CS HS Initiation	LAML
TOTAL	42	1	0.00285345	0.0446911	0.0934717	20	0	0.00295463	62	1	21	1	0.00160171	Recognition and association of DNA glycosylase with site containing an affected pyrimidine	H2AFX	CS HS Initiation	LAML
TOTAL	44	1	0.00298933	0.0467718	0.0934717	3	0	0.0022398	47	1	4	4	0.000305087	PRC2 methylates histones and DNA	H2AFX	CS HS Initiation	LAML
TOTAL	44	1	0.00298933	0.0467718	0.0934717	445	0	0.022398	470	1	14	2	0.00106781	Deactivation of the beta-catenin transactivating complex	CTBP1	CS HS Initiation	LAML
TOTAL	44	1	0.00298933	0.0467718	0.0934717	423	0	0.0212543	446	1	27	2	0.00205934	SUMOylation of transcription cofactors	CTBP1	CS HS Initiation	LAML
TOTAL	45	1	0.00305727	0.0478106	0.0934717	112	0	0.00733892	154	1	5	3	0.000381359	SIRT1 negatively regulates rRNA expression	H2AFX	CS HS Initiation	LAML
TOTAL	45	1	0.00305727	0.0478106	0.0934717	0	0	0.00214449	45	1	9	2	0.000686446	Cleavage of the damaged purine	H2AFX	CS HS Initiation	LAML
TOTAL	46	1	0.00312521	0.0488483	0.0934717	2	0	0.00228746	48	1	19	4	0.00144916	Depurination	H2AFX	CS HS Initiation	LAML
TOTAL	332	2	0.0225559	0.0495157	0.0934717	1509	0	0.0837781	1758	2	157	6	0.0119747	Signaling by WNT	CTBP1;H2AFX	CS HS Initiation	LAML
TOTAL	48	1	0.00326109	0.0509205	0.0934717	96	0	0.00657644	138	1	4	3	0.000305087	Inhibition of DNA recombination at telomere	H2AFX	CS HS Initiation	LAML
TOTAL	48	1	0.00326109	0.0509205	0.0934717	77	0	0.00548037	115	1	4	2	0.000305087	ERCC6 (CSB) and EHMT2 (G9a) positively regulate rRNA expression	H2AFX	CS HS Initiation	LAML
TOTAL	49	1	0.00332903	0.051955	0.0934717	168	0	0.0102936	216	1	11	8	0.00083899	Activated PKN1 stimulates transcription of AR (androgen receptor) regulated genes KLK2 and KLK3	H2AFX	CS HS Initiation	LAML
TOTAL	51	1	0.00346491	0.0540209	0.0934717	0	0	0.00243042	51	1	20	1	0.00152544	Cleavage of the damaged pyrimidine	H2AFX	CS HS Initiation	LAML
TOTAL	51	1	0.00346491	0.0540209	0.0934717	20	0	0.00338353	71	1	41	2	0.00312715	Depyrimidination	H2AFX	CS HS Initiation	LAML
TOTAL	53	1	0.00360079	0.0560826	0.0934717	278	0	0.0150591	316	1	22	1	0.00167798	RMTs methylate histone arginines	H2AFX	CS HS Initiation	LAML
TOTAL	54	1	0.00366873	0.0571118	0.0934717	0	0	0.00257339	54	1	4	2	0.000305087	Nucleosome assembly	H2AFX	CS HS Initiation	LAML
TOTAL	54	1	0.00366873	0.0571118	0.0934717	0	0	0.00257339	54	1	4	2	0.000305087	Deposition of new CENPA-containing nucleosomes at the centromere	H2AFX	CS HS Initiation	LAML
TOTAL	55	1	0.00373667	0.05814	0.0934717	133	0	0.00876859	184	1	10	8	0.000762718	Condensation of Prophase Chromosomes	H2AFX	CS HS Initiation	LAML
TOTAL	57	1	0.00387255	0.0601933	0.0934717	237	0	0.0129623	272	1	13	4	0.000991534	Nonhomologous End-Joining (NHEJ)	H2AFX	CS HS Initiation	LAML
TOTAL	58	1	0.00394049	0.0612183	0.0934717	252	0	0.013963	293	1	9	4	0.000686446	Meiotic recombination	H2AFX	CS HS Initiation	LAML
TOTAL	62	1	0.00421224	0.065308	0.0934717	298	0	0.0165841	348	1	6	4	0.000457631	Meiotic synapsis	H2AFX	CS HS Initiation	LAML
TOTAL	62	1	0.00421224	0.065308	0.0934717	192	0	0.0117709	247	1	3	1	0.000228815	B-WICH complex positively regulates rRNA expression	H2AFX	CS HS Initiation	LAML
TOTAL	62	1	0.00421224	0.065308	0.0934717	22	0	0.00400305	84	1	62	6	0.00472885	Base-Excision Repair, AP Site Formation	H2AFX	CS HS Initiation	LAML
TOTAL	64	1	0.00434812	0.0673466	0.0934717	0	0	0.00304994	64	1	2	1	0.000152544	RNA Polymerase I Promoter Escape	H2AFX	CS HS Initiation	LAML
TOTAL	66	1	0.004484	0.069381	0.0934717	340	0	0.0182997	384	1	35	29	0.00266951	Recruitment and ATM-mediated phosphorylation of repair and signaling proteins at DNA double strand breaks	H2AFX	CS HS Initiation	LAML
TOTAL	67	1	0.00455194	0.0703967	0.0934717	590	0	0.0302135	634	1	13	2	0.000991534	Formation of the beta-catenin:TCF transactivating complex	H2AFX	CS HS Initiation	LAML
TOTAL	71	1	0.0048237	0.0744489	0.0934717	232	0	0.0135341	284	1	18	1	0.00137289	DNA Damage/Telomere Stress Induced Senescence	H2AFX	CS HS Initiation	LAML
TOTAL	71	1	0.0048237	0.0744489	0.0934717	333	0	0.0186809	392	1	27	1	0.00205934	Transcriptional regulation of granulopoiesis	H2AFX	CS HS Initiation	LAML
TOTAL	74	1	0.00502752	0.0774772	0.0934717	395	0	0.0211113	443	1	44	29	0.00335596	DNA Double Strand Break Response	H2AFX	CS HS Initiation	LAML
TOTAL	78	1	0.00529927	0.0815004	0.0934717	307	0	0.0179184	376	1	33	20	0.00251697	RUNX1 regulates genes involved in megakaryocyte differentiation and platelet function	H2AFX	CS HS Initiation	LAML
TOTAL	80	1	0.00543515	0.0835059	0.0934717	266	0	0.0156786	329	1	7	3	0.000533903	Positive epigenetic regulation of rRNA expression	H2AFX	CS HS Initiation	LAML
TOTAL	80	1	0.00543515	0.0835059	0.0934717	167	0	0.0111514	234	1	7	3	0.000533903	NoRC negatively regulates rRNA expression	H2AFX	CS HS Initiation	LAML
TOTAL	80	1	0.00543515	0.0835059	0.0934717	198	0	0.0130099	273	1	20	8	0.00152544	RHO GTPases activate PKNs	H2AFX	CS HS Initiation	LAML
TOTAL	81	1	0.00550309	0.0845071	0.0934717	22	0	0.00481319	101	1	5	1	0.000381359	Transcriptional regulation by small RNAs	H2AFX	CS HS Initiation	LAML
TOTAL	81	1	0.00550309	0.0845071	0.0934717	42	0	0.00538506	113	1	12	2	0.000915262	G2/M DNA damage checkpoint	H2AFX	CS HS Initiation	LAML
TOTAL	87	1	0.00591073	0.0904927	0.0934717	192	0	0.0126763	266	1	10	2	0.000762718	RNA Polymerase I Promoter Clearance	H2AFX	CS HS Initiation	LAML
TOTAL	88	1	0.00597867	0.0914867	0.0934717	251	0	0.015345	322	1	33	1	0.00251697	Amyloid fiber formation	H2AFX	CS HS Initiation	LAML
TOTAL	89	1	0.00604661	0.0924797	0.0934717	256	0	0.0156786	329	1	12	6	0.000915262	Negative epigenetic regulation of rRNA expression	H2AFX	CS HS Initiation	LAML
TOTAL	89	1	0.00604661	0.0924797	0.0934717	213	0	0.0137247	288	1	14	2	0.00106781	RNA Polymerase I Transcription	H2AFX	CS HS Initiation	LAML
TOTAL	89	1	0.00604661	0.0924797	0.0934717	144	0	0.0108654	228	1	28	3	0.00213561	Pre-NOTCH Transcription and Translation	H2AFX	CS HS Initiation	LAML
TOTAL	90	1	0.00611455	0.0934717	0.0934717	191	0	0.0123904	260	1	17	2	0.00129662	Processing of DNA double-strand break ends	H2AFX	CS HS Initiation	LAML
TOTAL	91	1	0.00618249	0.0944627	0.0944627	47	0	0.00648113	136	1	22	2	0.00167798	Senescence-Associated Secretory Phenotype (SASP)	H2AFX	CS HS Initiation	LAML
TOTAL	91	1	0.00618249	0.0944627	0.0944627	574	0	0.030976	650	1	23	2	0.00175425	Degradation of beta-catenin by the destruction complex	CTBP1	CS HS Initiation	LAML
TOTAL	92	1	0.00625042	0.0954527	0.0954527	484	0	0.0260198	546	1	15	8	0.00114408	Meiosis	H2AFX	CS HS Initiation	LAML
TOTAL	20	2	0.00135879	0.000836297	0.0194727	94	0	0.00505147	106	2	17	2	0.00129662	TP53 Regulates Transcription of Genes Involved in G1 Cell Cycle Arrest	ARID3A;ARID3A	HS extension	LAML
TOTAL	25	2	0.00169848	0.00129818	0.0194727	103	0	0.00595692	125	2	12	12	0.000915262	Transcription of E2F targets under negative control by DREAM complex	MAX;LIN9	HS extension	LAML
TOTAL	38	2	0.0025817	0.00294872	0.0294872	284	0	0.0143443	301	2	27	14	0.00205934	G0 and Early G1	MAX;LIN9	HS extension	LAML
TOTAL	65	2	0.00441606	0.00832881	0.0583016	332	0	0.0178708	375	2	42	2	0.00320342	TP53 Regulates Transcription of Cell Cycle Genes	ARID3A;ARID3A	HS extension	LAML
TOTAL	88	2	0.00597867	0.0148156	0.077282	233	0	0.0141536	297	2	20	2	0.00152544	Cyclin E associated events during G1/S transition	MAX;LIN9	HS extension	LAML
TOTAL	90	2	0.00611455	0.0154564	0.077282	182	0	0.0120091	252	2	19	1	0.00144916	Cyclin A:Cdk2-associated events at S phase entry	MAX;LIN9	HS extension	LAML
TOTAL	260	4	0.0176642	0.0012344	0.0283912	449	0	0.0301182	632	4	85	9	0.00648311	Chromatin organization	EHMT2;BRD1;KDM5C;SMARCA4	O-mannose	LAML
TOTAL	260	4	0.0176642	0.0012344	0.0283912	449	0	0.0301182	632	4	85	9	0.00648311	Chromatin modifying enzymes	EHMT2;BRD1;KDM5C;SMARCA4	O-mannose	LAML
TOTAL	66	3	0.004484	0.00044476	0.0582636	248	0	0.0144872	304	3	40	33	0.00305087	NR1H3 & NR1H2 regulate gene expression linked to cholesterol transport and efflux	NR1H3;NR1H3	O-Fucosylation	LAML
TOTAL	85	3	0.00577485	0.000922963	0.0583654	332	0	0.0193957	407	3	60	53	0.00457631	NR1H2 and NR1H3-mediated signaling	NR1H3;NR1H3	O-Fucosylation	LAML
TOTAL	24	2	0.00163055	0.00135733	0.0583654	67	0	0.00405071	85	2	11	6	0.00083899	ZBP1(DAI) mediated induction of type I IFNs	IRF3;RELA	O-Fucosylation	LAML
TOTAL	110	4	0.00747333	1.68631e-05	0.000741978	494	0	0.0277831	583	4	85	4	0.00648311	FOXO-mediated transcription	BCL6;BCL6;KLF4;KLF4	Type 1 and 2 LacNAc	LAML
TOTAL	104	3	0.0070657	0.000426488	0.00593489	437	0	0.0246378	517	3	59	38	0.00450004	Circadian Clock	ARNTL;MEF2D;ARNTL	Type 1 and 2 LacNAc	LAML
TOTAL	23	2	0.00156261	0.000502722	0.00593489	153	0	0.00824438	173	2	15	2	0.00114408	FOXO-mediated transcription of cell death genes	BCL6;BCL6	Type 1 and 2 LacNAc	LAML
TOTAL	27	2	0.00183436	0.00069041	0.00593489	176	0	0.00957873	201	2	22	2	0.00167798	FOXO-mediated transcription of cell cycle genes	KLF4;KLF4	Type 1 and 2 LacNAc	LAML
TOTAL	28	2	0.0019023	0.000741861	0.00593489	98	0	0.0057663	121	2	19	2	0.00144916	TP53 regulates transcription of several additional cell death genes whose specific roles in p53-dependent apoptosis remain uncertain	BCL6;BCL6	Type 1 and 2 LacNAc	LAML
TOTAL	216	3	0.0146749	0.0034484	0.0241388	143	0	0.0165364	347	3	47	15	0.00358478	Interleukin-4 and Interleukin-13 signaling	BCL6;STAT6;BCL6	Type 1 and 2 LacNAc	LAML
TOTAL	83	2	0.00563897	0.00621832	0.0355473	280	0	0.0163934	344	2	68	2	0.00518648	TP53 Regulates Transcription of Cell Death Genes	BCL6;BCL6	Type 1 and 2 LacNAc	LAML
TOTAL	5	1	0.000339697	0.00710946	0.0355473	40	0	0.00200152	42	1	6	6	0.000457631	STAT6-mediated induction of chemokines	STAT6	Type 1 and 2 LacNAc	LAML
TOTAL	216	6	0.0146749	0.000502057	0.0892158	143	0	0.0165364	347	6	47	2	0.00358478	Interleukin-4 and Interleukin-13 signaling	RORA;GATA3;RORA;FOXO1;FOXO1;GATA3	sialylation	LAML
TOTAL	10	2	0.000679394	0.00102055	0.0892158	45	0	0.00252573	53	2	8	2	0.000610175	MECP2 regulates transcription factors	MEF2C;MEF2C	sialylation	LAML
TOTAL	104	4	0.0070657	0.00141612	0.0892158	437	0	0.0246378	517	4	59	14	0.00450004	Circadian Clock	RORA;RORA;MEF2C;CREBBP	sialylation	LAML
TOTAL	4	2	0.000271758	1.39862e-05	0.000587422	0	0	0.000190621	4	2	2	2	0.000152544	RUNX3 regulates RUNX1-mediated transcription	RUNX1	fucosylation	LAML
TOTAL	118	3	0.00801685	0.000530317	0.0111367	378	0	0.022398	470	3	47	4	0.00358478	Transcriptional regulation by RUNX3	RUNX1;RUNX1	fucosylation	LAML
TOTAL	32	2	0.00217406	0.000874936	0.0122491	137	0	0.00781548	164	2	19	18	0.00144916	Regulation of RUNX1 Expression and Activity	RUNX1;RUNX1	fucosylation	LAML
TOTAL	71	2	0.0048237	0.00417274	0.0364749	333	0	0.0186809	392	2	27	3	0.00205934	Transcriptional regulation of granulopoiesis	RUNX1;GATA2	fucosylation	LAML
TOTAL	261	3	0.0177322	0.00507074	0.0364749	830	0	0.0498952	1047	3	132	123	0.0100679	Transcriptional regulation by RUNX1	RUNX1;RUNX1;GATA2	fucosylation	LAML
TOTAL	6	1	0.000407636	0.00812123	0.0364749	18	0	0.00109607	23	1	2	1	0.000152544	RUNX2 regulates genes involved in differentiation of myeloid cells	RUNX1	fucosylation	LAML
TOTAL	106	2	0.00720158	0.00904027	0.0364749	131	0	0.0111037	233	2	15	10	0.00114408	RUNX1 regulates transcription of genes involved in differentiation of HSCs	RUNX1;GATA2	fucosylation	LAML
TOTAL	7	1	0.000475576	0.00946867	0.0364749	5	0	0.000571864	12	1	5	5	0.000381359	RUNX1 regulates transcription of genes involved in interleukin signaling	RUNX1	fucosylation	LAML
TOTAL	7	1	0.000475576	0.00946867	0.0364749	74	0	0.00381243	80	1	4	4	0.000305087	RUNX1 regulates transcription of genes involved in BCR signaling	RUNX1	fucosylation	LAML
TOTAL	8	1	0.000543515	0.0108144	0.0364749	50	0	0.00276401	58	1	6	6	0.000457631	RUNX1 regulates expression of components of tight junctions	RUNX1	fucosylation	LAML
TOTAL	9	1	0.000611455	0.0121583	0.0364749	63	0	0.00338353	71	1	4	4	0.000305087	RUNX1 regulates transcription of genes involved in WNT signaling	RUNX1	fucosylation	LAML
TOTAL	10	1	0.000679394	0.0135005	0.0405016	95	0	0.0049085	103	1	8	7	0.000610175	RUNX1 regulates estrogen receptor mediated transcription	RUNX1	fucosylation	LAML
TOTAL	11	1	0.000747333	0.014841	0.0430351	55	0	0.0030976	65	1	7	7	0.000533903	RUNX1 regulates transcription of genes involved in differentiation of myeloid cells	RUNX1	fucosylation	LAML
TOTAL	11	1	0.000747333	0.014841	0.0430351	22	0	0.00157263	33	1	8	6	0.000610175	RUNX1 regulates transcription of genes involved in differentiation of keratinocytes	RUNX1	fucosylation	LAML
TOTAL	16	1	0.00108703	0.0215176	0.0430351	98	0	0.0053374	112	1	8	2	0.000610175	RUNX3 regulates p14-ARF	RUNX1	fucosylation	LAML
TOTAL	17	1	0.00115497	0.0228477	0.0456954	38	0	0.00252573	53	1	20	20	0.00152544	RUNX1 and FOXP3 control the development of regulatory T lymphocytes (Tregs)	RUNX1	fucosylation	LAML
TOTAL	39	1	0.00264964	0.0516798	0.0969522	59	0	0.0044796	94	1	5	5	0.000381359	RUNX1 interacts with co-factors whose precise effect on RUNX1 targets is not known	RUNX1	fucosylation	LAML
TOTAL	39	1	0.00264964	0.0516798	0.0969522	11	0	0.00238277	50	1	9	1	0.000686446	Organic cation transport	RUNX1	fucosylation	LAML
TOTAL	1554	5	0.105578	0.0526617	0.0969522	3712	0	0.22927	4811	5	824	130	0.062848	Generic Transcription Pathway	RUNX1;RUNX1;MED12;GATA2	fucosylation	LAML
TOTAL	51	1	0.00346491	0.0670639	0.0969522	12	0	0.00300229	63	1	12	1	0.000915262	Organic cation/anion/zwitterion transport	RUNX1	fucosylation	LAML
TOTAL	1693	5	0.115021	0.0714354	0.0969522	3857	0	0.239802	5032	5	885	130	0.0675006	RNA Polymerase II Transcription	RUNX1;RUNX1;MED12;GATA2	fucosylation	LAML
TOTAL	1851	5	0.125756	0.0969522	0.0969522	4048	0	0.253241	5314	5	996	130	0.0759667	Gene expression (Transcription)	RUNX1;RUNX1;MED12;GATA2	fucosylation	LAML
TOTAL	4	2	0.000271758	1.39862e-05	0.00100701	0	0	0.000190621	4	2	2	2	0.000152544	RUNX3 regulates RUNX1-mediated transcription	RUNX1	ABO blood group	LAML
TOTAL	118	3	0.00801685	0.000530317	0.0190914	378	0	0.022398	470	3	47	4	0.00358478	Transcriptional regulation by RUNX3	RUNX1;RUNX1	ABO blood group	LAML
TOTAL	32	2	0.00217406	0.000874936	0.0209985	137	0	0.00781548	164	2	19	18	0.00144916	Regulation of RUNX1 Expression and Activity	RUNX1;RUNX1	ABO blood group	LAML
TOTAL	6	1	0.000407636	0.00812123	0.0683351	18	0	0.00109607	23	1	2	1	0.000152544	RUNX2 regulates genes involved in differentiation of myeloid cells	RUNX1	ABO blood group	LAML
TOTAL	7	1	0.000475576	0.00946867	0.0683351	74	0	0.00381243	80	1	4	4	0.000305087	RUNX1 regulates transcription of genes involved in BCR signaling	RUNX1	ABO blood group	LAML
TOTAL	7	1	0.000475576	0.00946867	0.0683351	5	0	0.000571864	12	1	5	5	0.000381359	RUNX1 regulates transcription of genes involved in interleukin signaling	RUNX1	ABO blood group	LAML
TOTAL	8	1	0.000543515	0.0108144	0.0683351	50	0	0.00276401	58	1	6	6	0.000457631	RUNX1 regulates expression of components of tight junctions	RUNX1	ABO blood group	LAML
TOTAL	9	1	0.000611455	0.0121583	0.0683351	63	0	0.00338353	71	1	4	4	0.000305087	RUNX1 regulates transcription of genes involved in WNT signaling	RUNX1	ABO blood group	LAML
TOTAL	9	1	0.000611455	0.0121583	0.0683351	0	0	0.000428898	9	1	3	3	0.000228815	STAT5 Activation	STAT5A	ABO blood group	LAML
TOTAL	9	1	0.000611455	0.0121583	0.0683351	0	0	0.000428898	9	1	3	3	0.000228815	Erythropoietin activates STAT5	STAT5A	ABO blood group	LAML
TOTAL	10	1	0.000679394	0.0135005	0.0683351	95	0	0.0049085	103	1	8	7	0.000610175	RUNX1 regulates estrogen receptor mediated transcription	RUNX1	ABO blood group	LAML
TOTAL	11	1	0.000747333	0.014841	0.0683351	55	0	0.0030976	65	1	7	7	0.000533903	RUNX1 regulates transcription of genes involved in differentiation of myeloid cells	RUNX1	ABO blood group	LAML
TOTAL	11	1	0.000747333	0.014841	0.0683351	22	0	0.00157263	33	1	8	6	0.000610175	RUNX1 regulates transcription of genes involved in differentiation of keratinocytes	RUNX1	ABO blood group	LAML
TOTAL	12	1	0.000815273	0.0161798	0.0683351	1	0	0.00061952	13	1	5	2	0.000381359	Interleukin-21 signaling	STAT5A	ABO blood group	LAML
TOTAL	13	1	0.000883212	0.0175168	0.0683351	125	0	0.00652878	137	1	19	5	0.00144916	Signaling by Leptin	STAT5A	ABO blood group	LAML
TOTAL	16	1	0.00108703	0.0215176	0.0683351	129	0	0.00676706	142	1	13	4	0.000991534	Interleukin-9 signaling	STAT5A	ABO blood group	LAML
TOTAL	16	1	0.00108703	0.0215176	0.0683351	335	0	0.0162028	340	1	17	5	0.00129662	Interleukin-15 signaling	STAT5A	ABO blood group	LAML
TOTAL	16	1	0.00108703	0.0215176	0.0683351	98	0	0.0053374	112	1	8	2	0.000610175	RUNX3 regulates p14-ARF	RUNX1	ABO blood group	LAML
TOTAL	17	1	0.00115497	0.0228477	0.0683351	38	0	0.00252573	53	1	20	20	0.00152544	RUNX1 and FOXP3 control the development of regulatory T lymphocytes (Tregs)	RUNX1	ABO blood group	LAML
TOTAL	18	1	0.00122291	0.0241761	0.0683351	46	0	0.00300229	63	1	14	2	0.00106781	Prolactin receptor signaling	STAT5A	ABO blood group	LAML
TOTAL	19	1	0.00129085	0.0255028	0.0683351	82	0	0.00457491	96	1	19	5	0.00144916	Interleukin-2 signaling	STAT5A	ABO blood group	LAML
TOTAL	26	1	0.00176642	0.0347419	0.0683351	163	0	0.0088639	186	1	14	1	0.00106781	Signaling by cytosolic FGFR1 fusion mutants	STAT5A	ABO blood group	LAML
TOTAL	28	1	0.0019023	0.0373663	0.0683351	127	0	0.00724361	152	1	11	4	0.00083899	Signaling by phosphorylated juxtamembrane, extracellular and kinase domain KIT mutants	STAT5A	ABO blood group	LAML
TOTAL	29	1	0.00197024	0.0386759	0.0683351	105	0	0.00609989	128	1	28	5	0.00213561	Growth hormone receptor signaling	STAT5A	ABO blood group	LAML
TOTAL	29	1	0.00197024	0.0386759	0.0683351	183	0	0.00962638	202	1	56	3	0.00427122	Interleukin-20 family signaling	STAT5A	ABO blood group	LAML
TOTAL	35	1	0.00237788	0.0464984	0.0683351	166	0	0.00924514	194	1	24	3	0.00183052	Signaling by Erythropoietin	STAT5A	ABO blood group	LAML
TOTAL	36	1	0.00244582	0.0477963	0.0683351	148	0	0.00848265	178	1	26	9	0.00198307	Interleukin-7 signaling	STAT5A	ABO blood group	LAML
TOTAL	261	2	0.0177322	0.0483636	0.0683351	830	0	0.0498952	1047	2	132	123	0.0100679	Transcriptional regulation by RUNX1	RUNX1;RUNX1	ABO blood group	LAML
TOTAL	37	1	0.00251376	0.0490925	0.0683351	288	0	0.0148208	311	1	16	1	0.00122035	Downstream signal transduction	STAT5A	ABO blood group	LAML
TOTAL	39	1	0.00264964	0.0516798	0.0683351	59	0	0.0044796	94	1	5	5	0.000381359	RUNX1 interacts with co-factors whose precise effect on RUNX1 targets is not known	RUNX1	ABO blood group	LAML
TOTAL	39	1	0.00264964	0.0516798	0.0683351	11	0	0.00238277	50	1	9	1	0.000686446	Organic cation transport	RUNX1	ABO blood group	LAML
TOTAL	43	1	0.00292139	0.0568344	0.0683351	127	0	0.00795844	167	1	26	4	0.00198307	Signaling by KIT in disease	STAT5A	ABO blood group	LAML
TOTAL	47	1	0.00319315	0.0619624	0.0683351	194	0	0.0112467	236	1	34	4	0.00259324	Nuclear signaling by ERBB4	STAT5A	ABO blood group	LAML
TOTAL	48	1	0.00326109	0.0632402	0.0683351	166	0	0.0100076	210	1	25	1	0.0019068	FGFR1 mutant receptor activation	STAT5A	ABO blood group	LAML
TOTAL	50	1	0.00339697	0.065791	0.0683351	311	0	0.0162028	340	1	38	5	0.00289833	Interleukin-3, Interleukin-5 and GM-CSF signaling	STAT5A	ABO blood group	LAML
TOTAL	51	1	0.00346491	0.0670639	0.0683351	12	0	0.00300229	63	1	12	1	0.000915262	Organic cation/anion/zwitterion transport	RUNX1	ABO blood group	LAML
TOTAL	52	1	0.00353285	0.0683351	0.0683351	405	0	0.0205395	431	1	59	16	0.00450004	Interleukin-2 family signaling	STAT5A	ABO blood group	LAML
TOTAL	58	1	0.00394049	0.0759281	0.0759281	221	0	0.0129146	271	1	35	1	0.00266951	Signaling by FGFR1 in disease	STAT5A	ABO blood group	LAML
TOTAL	66	1	0.004484	0.0859607	0.0859607	260	0	0.0147255	309	1	39	4	0.0029746	Signaling by SCF-KIT	STAT5A	ABO blood group	LAML
TOTAL	71	1	0.0048237	0.0921784	0.0921784	333	0	0.0186809	392	1	27	3	0.00205934	Transcriptional regulation of granulopoiesis	RUNX1	ABO blood group	LAML
TOTAL	71	3	0.0048237	0.000102642	0.00174492	333	0	0.0186809	392	3	27	18	0.00205934	Transcriptional regulation of granulopoiesis	CEBPA;CEBPA	sulfotransferases	LAML
TOTAL	116	3	0.00788097	0.000431512	0.00215756	632	0	0.0350267	735	3	43	5	0.00327969	Activation of anterior HOX genes in hindbrain development during early embryogenesis	HOXA2;HOXA2	sulfotransferases	LAML
TOTAL	116	3	0.00788097	0.000431512	0.00215756	632	0	0.0350267	735	3	43	5	0.00327969	Activation of HOX genes during differentiation	HOXA2;HOXA2	sulfotransferases	LAML
TOTAL	1243	6	0.0844487	0.00374411	0.0149764	2923	0	0.182377	3827	6	538	30	0.0410342	Developmental Biology	CEBPA;HOXA2;CEBPA;HOXA2	sulfotransferases	LAML
TOTAL	108	2	0.00733745	0.0084735	0.0254205	414	0	0.0236847	497	2	18	5	0.00137289	Transcriptional regulation of white adipocyte differentiation	CEBPA;CEBPA	sulfotransferases	LAML
TOTAL	39	1	0.00264964	0.0491604	0.0983208	59	0	0.0044796	94	1	5	1	0.000381359	RUNX1 interacts with co-factors whose precise effect on RUNX1 targets is not known	SMARCC2	sulfotransferases	LAML
TOTAL	12	2	0.000815273	0.00021322	0.0021322	111	0	0.00557568	117	2	5	4	0.000381359	Activation of the AP-1 family of transcription factors	FOS;JUN	P1PK blood group	LGG
TOTAL	29	2	0.00197024	0.0012225	0.00884574	171	0	0.00919748	193	2	12	2	0.000915262	Estrogen-dependent nuclear events downstream of ESR-membrane signaling	FOS;FOS	P1PK blood group	LGG
TOTAL	35	2	0.00237788	0.00176915	0.00884574	157	0	0.00862562	181	2	16	4	0.00122035	MAPK targets/ Nuclear events mediated by MAP kinases	FOS;JUN	P1PK blood group	LGG
TOTAL	69	2	0.00468782	0.00662747	0.017234	190	0	0.0113896	239	2	32	4	0.0024407	MAP kinase activation	FOS;JUN	P1PK blood group	LGG
TOTAL	77	2	0.00523133	0.00818235	0.017234	190	0	0.0117709	247	2	35	4	0.00266951	Interleukin-17 signaling	FOS;JUN	P1PK blood group	LGG
TOTAL	256	3	0.0173925	0.010144	0.017234	1051	0	0.0599028	1257	3	110	4	0.0083899	ESR-mediated signaling	FOS;FOS;JUN	P1PK blood group	LGG
TOTAL	89	2	0.00604661	0.0107908	0.017234	119	0	0.00953107	200	2	17	2	0.00129662	TP53 Regulates Transcription of DNA Repair Genes	FOS;JUN	P1PK blood group	LGG
TOTAL	91	2	0.00618249	0.0112569	0.017234	47	0	0.00648113	136	2	22	4	0.00167798	Senescence-Associated Secretory Phenotype (SASP)	FOS;JUN	P1PK blood group	LGG
TOTAL	94	2	0.0063863	0.0119726	0.017234	374	0	0.0204918	430	2	58	4	0.00442377	MyD88 cascade initiated on plasma membrane	FOS;JUN	P1PK blood group	LGG
TOTAL	94	2	0.0063863	0.0119726	0.017234	376	0	0.0205395	431	2	59	4	0.00450004	Toll Like Receptor 10 (TLR10) Cascade	FOS;JUN	P1PK blood group	LGG
TOTAL	94	2	0.0063863	0.0119726	0.017234	378	0	0.0206824	434	2	59	4	0.00450004	Toll Like Receptor 5 (TLR5) Cascade	FOS;JUN	P1PK blood group	LGG
TOTAL	101	2	0.00686188	0.0137182	0.017234	350	0	0.0199199	418	2	48	4	0.00366105	TRAF6 mediated induction of NFkB and MAP kinases upon TLR7/8 or 9 activation	FOS;JUN	P1PK blood group	LGG
TOTAL	102	2	0.00692982	0.0139761	0.017234	406	0	0.0219215	460	2	61	4	0.00465258	Toll Like Receptor 3 (TLR3) Cascade	FOS;JUN	P1PK blood group	LGG
TOTAL	102	2	0.00692982	0.0139761	0.017234	383	0	0.0212543	446	2	63	4	0.00480513	MyD88 dependent cascade initiated on endosome	FOS;JUN	P1PK blood group	LGG
TOTAL	104	2	0.0070657	0.0144983	0.017234	383	0	0.0213496	448	2	66	4	0.00503394	Toll Like Receptor 7/8 (TLR7/8) Cascade	FOS;JUN	P1PK blood group	LGG
TOTAL	107	2	0.00726952	0.0152973	0.017234	436	0	0.0236847	497	2	58	4	0.00442377	TRIF(TICAM1)-mediated TLR4 signaling	FOS;JUN	P1PK blood group	LGG
TOTAL	107	2	0.00726952	0.0152973	0.017234	437	0	0.0236847	497	2	60	4	0.00457631	MyD88-independent TLR4 cascade	FOS;JUN	P1PK blood group	LGG
TOTAL	107	2	0.00726952	0.0152973	0.017234	387	0	0.0216832	455	2	68	4	0.00518648	Toll Like Receptor 9 (TLR9) Cascade	FOS;JUN	P1PK blood group	LGG
TOTAL	110	2	0.00747333	0.016115	0.017234	326	0	0.0200152	420	2	38	2	0.00289833	Extra-nuclear estrogen signaling	FOS;FOS	P1PK blood group	LGG
TOTAL	111	2	0.00754127	0.0163917	0.017234	470	0	0.0256386	538	2	64	4	0.0048814	MyD88:MAL(TIRAP) cascade initiated on plasma membrane	FOS;JUN	P1PK blood group	LGG
TOTAL	111	2	0.00754127	0.0163917	0.017234	474	0	0.0258292	542	2	66	4	0.00503394	Toll Like Receptor TLR6:TLR2 Cascade	FOS;JUN	P1PK blood group	LGG
TOTAL	114	2	0.00774509	0.017234	0.017234	258	0	0.016727	351	2	40	5	0.00305087	Oxidative Stress Induced Senescence	FOS;JUN	P1PK blood group	LGG
TOTAL	114	2	0.00774509	0.017234	0.017234	471	0	0.0258292	542	2	66	4	0.00503394	Toll Like Receptor TLR1:TLR2 Cascade	FOS;JUN	P1PK blood group	LGG
TOTAL	114	2	0.00774509	0.017234	0.017234	474	0	0.0259722	545	2	68	4	0.00518648	Toll Like Receptor 2 (TLR2) Cascade	FOS;JUN	P1PK blood group	LGG
TOTAL	116	2	0.00788097	0.0178056	0.0178056	632	0	0.0350267	735	2	43	4	0.00327969	Activation of HOX genes during differentiation	MAFB;JUN	P1PK blood group	LGG
TOTAL	116	2	0.00788097	0.0178056	0.0178056	632	0	0.0350267	735	2	43	4	0.00327969	Activation of anterior HOX genes in hindbrain development during early embryogenesis	MAFB;JUN	P1PK blood group	LGG
TOTAL	124	2	0.00842449	0.0201719	0.0201719	241	0	0.0169177	355	2	20	3	0.00152544	FCERI mediated MAPK activation	FOS;JUN	P1PK blood group	LGG
TOTAL	144	2	0.00978327	0.0266256	0.0266256	594	0	0.0323103	678	2	95	4	0.00724582	Toll Like Receptor 4 (TLR4) Cascade	FOS;JUN	P1PK blood group	LGG
TOTAL	385	3	0.0261567	0.0297058	0.0297058	1273	0	0.0759626	1594	3	191	4	0.0145679	Signaling by Nuclear Receptors	FOS;FOS;JUN	P1PK blood group	LGG
TOTAL	154	2	0.0104627	0.0301271	0.0301271	847	0	0.0461304	968	2	66	2	0.00503394	Estrogen-dependent gene expression	FOS;JUN	P1PK blood group	LGG
TOTAL	20	1	0.00135879	0.0347349	0.0347349	108	0	0.00600457	126	1	9	1	0.000686446	Killing mechanisms	JUN	P1PK blood group	LGG
TOTAL	20	1	0.00135879	0.0347349	0.0347349	108	0	0.00600457	126	1	9	1	0.000686446	WNT5:FZD7-mediated leishmania damping	JUN	P1PK blood group	LGG
TOTAL	185	2	0.0125688	0.0420579	0.0420579	658	0	0.0371235	779	2	185	4	0.0141103	Toll-like Receptor Cascades	FOS;JUN	P1PK blood group	LGG
TOTAL	200	2	0.0135879	0.0483734	0.0483734	551	0	0.0332158	697	2	90	9	0.00686446	Cellular Senescence	FOS;JUN	P1PK blood group	LGG
TOTAL	30	1	0.00203818	0.0516644	0.0516644	852	0	0.0414125	869	1	22	1	0.00167798	Neurodegenerative Diseases	JUN	P1PK blood group	LGG
TOTAL	30	1	0.00203818	0.0516644	0.0516644	852	0	0.0414125	869	1	22	1	0.00167798	Deregulated CDK5 triggers multiple neurodegenerative pathways in Alzheimer's disease models	JUN	P1PK blood group	LGG
TOTAL	216	2	0.0146749	0.0554681	0.0554681	143	0	0.0165364	347	2	47	1	0.00358478	Interleukin-4 and Interleukin-13 signaling	FOS;FOS	P1PK blood group	LGG
TOTAL	37	1	0.00251376	0.0633447	0.0633447	852	0	0.0416508	874	1	24	1	0.00183052	Diseases of programmed cell death	JUN	P1PK blood group	LGG
TOTAL	235	2	0.0159658	0.0643408	0.0643408	442	0	0.0304518	639	2	63	3	0.00480513	Fc epsilon receptor (FCERI) signaling	FOS;JUN	P1PK blood group	LGG
TOTAL	56	1	0.00380461	0.0943555	0.0943555	296	0	0.0162981	342	1	37	2	0.00282206	NGF-stimulated transcription	FOS	P1PK blood group	LGG
TOTAL	10	2	0.000679394	6.23494e-05	0.00511265	45	0	0.00252573	53	2	8	2	0.000610175	MECP2 regulates transcription factors	MEF2C;MEF2C	Gangliosides	LGG
TOTAL	10	2	0.000679394	0.000225854	0.0203268	45	0	0.00252573	53	2	8	2	0.000610175	MECP2 regulates transcription factors	MEF2C;MEF2C	GalNAc-type O-glycans	LGG
TOTAL	100	3	0.00679394	0.00134221	0.0603993	359	0	0.0214449	450	3	77	4	0.00587293	Transcriptional Regulation by MECP2	MEF2C;SOX2;MEF2C	GalNAc-type O-glycans	LGG
TOTAL	44	2	0.00298933	0.00417575	0.0959598	445	0	0.022398	470	2	14	2	0.00106781	Deactivation of the beta-catenin transactivating complex	SOX2;SOX4	GalNAc-type O-glycans	LGG
TOTAL	45	2	0.00305727	0.00436181	0.0959598	227	0	0.0127716	268	2	35	28	0.00266951	Transcriptional regulation of pluripotent stem cells	SOX2;SOX2	GalNAc-type O-glycans	LGG
TOTAL	10	2	0.000679394	7.01113e-05	0.00666058	45	0	0.00252573	53	2	8	2	0.000610175	MECP2 regulates transcription factors	MEF2C;MEF2C	HS extension	LGG
TOTAL	104	3	0.0070657	0.000265845	0.0124947	437	0	0.0246378	517	3	59	5	0.00450004	Circadian Clock	PPARA;MEF2C;PPARA	HS extension	LGG
TOTAL	42	2	0.00285345	0.00120844	0.0374617	114	0	0.00724361	152	2	20	2	0.00152544	BMAL1:CLOCK,NPAS2 activates circadian gene expression	PPARA;PPARA	HS extension	LGG
TOTAL	87	2	0.00591073	0.00501927	0.0956053	193	0	0.0127716	268	2	32	2	0.0024407	Transcriptional activation of mitochondrial biogenesis	MEF2C;PPARA	HS extension	LGG
TOTAL	100	2	0.00679394	0.0065694	0.0956053	359	0	0.0214449	450	2	77	2	0.00587293	Transcriptional Regulation by MECP2	MEF2C;MEF2C	HS extension	LGG
TOTAL	127	2	0.0086283	0.0103914	0.0956053	324	0	0.0206348	433	2	36	2	0.00274579	Mitochondrial biogenesis	MEF2C;PPARA	HS extension	LGG
TOTAL	174	2	0.0118215	0.0188568	0.0956053	363	0	0.0250191	525	2	41	41	0.00312715	PPARA activates gene expression	PPARA;PPARA	HS extension	LGG
TOTAL	176	2	0.0119573	0.019265	0.0956053	393	0	0.0262581	551	2	44	44	0.00335596	Regulation of lipid metabolism by PPARalpha	PPARA;PPARA	HS extension	LGG
TOTAL	25	1	0.00169848	0.0301353	0.0956053	56	0	0.00386008	81	1	4	1	0.000305087	RORA activates gene expression	PPARA	HS extension	LGG
TOTAL	26	1	0.00176642	0.0313227	0.0956053	29	0	0.00257339	54	1	7	1	0.000533903	ERK/MAPK targets	MEF2C	HS extension	LGG
TOTAL	32	1	0.00217406	0.0384182	0.0956053	101	0	0.0061952	130	1	14	2	0.00106781	Myogenesis	MEF2C	HS extension	LGG
TOTAL	35	1	0.00237788	0.0419476	0.0956053	157	0	0.00862562	181	1	16	1	0.00122035	MAPK targets/ Nuclear events mediated by MAP kinases	MEF2C	HS extension	LGG
TOTAL	40	1	0.00271758	0.0478026	0.0956053	548	0	0.0274018	575	1	25	1	0.0019068	SUMOylation of intracellular receptors	PPARA	HS extension	LGG
TOTAL	29	1	0.00197024	0.0156537	0.0946638	163	0	0.0088639	186	1	20	6	0.00152544	Response of EIF2AK1 (HRI) to heme deficiency	CEBPG	Hyaluronan synthesis	LGG
TOTAL	34	1	0.00230994	0.0183308	0.0946638	80	0	0.00519443	109	1	7	1	0.000533903	ATF4 activates genes in response to endoplasmic reticulum stress	CEBPG	Hyaluronan synthesis	LGG
TOTAL	42	1	0.00285345	0.022601	0.0946638	82	0	0.00557568	117	1	11	1	0.00083899	PERK regulates gene expression	CEBPG	Hyaluronan synthesis	LGG
TOTAL	44	1	0.00298933	0.0236659	0.0946638	445	0	0.022398	470	1	14	1	0.00106781	Deactivation of the beta-catenin transactivating complex	SOX9	Hyaluronan synthesis	LGG
TOTAL	87	2	0.00591073	0.00501927	0.0415658	193	0	0.0127716	268	2	32	16	0.0024407	Transcriptional activation of mitochondrial biogenesis	NRF1;NRF1	O-mannose	LGG
TOTAL	95	2	0.00645424	0.00595032	0.0415658	374	0	0.0222074	466	2	47	1	0.00358478	XBP1(S) activates chaperone genes	ZBTB17;ZBTB17	O-mannose	LGG
TOTAL	101	2	0.00686188	0.00669661	0.0415658	378	0	0.022541	473	2	53	1	0.00404241	IRE1alpha activates chaperones	ZBTB17;ZBTB17	O-mannose	LGG
TOTAL	7	1	0.000475576	0.00852585	0.0415658	131	0	0.00633816	133	1	7	1	0.000533903	PTK6 Regulates Proteins Involved in RNA Processing	SFPQ	O-mannose	LGG
TOTAL	127	2	0.0086283	0.0103914	0.0415658	324	0	0.0206348	433	2	36	16	0.00274579	Mitochondrial biogenesis	NRF1;NRF1	O-mannose	LGG
TOTAL	155	2	0.0105306	0.0151695	0.0455085	730	0	0.0412695	866	2	94	1	0.00716955	Unfolded Protein Response (UPR)	ZBTB17;ZBTB17	O-mannose	LGG
TOTAL	14	1	0.000951152	0.016983	0.050949	395	0	0.0193481	406	1	7	1	0.000533903	Suppression of apoptosis	SFPQ	O-mannose	LGG
TOTAL	49	1	0.00332903	0.0582567	0.0833565	80	0	0.00586161	123	1	22	3	0.00167798	PKMTs methylate histone lysines	DOT1L	O-mannose	LGG
TOTAL	51	1	0.00346491	0.060565	0.0833565	661	0	0.0335494	704	1	30	1	0.00228815	Response of Mtb to phagocytosis	SFPQ	O-mannose	LGG
TOTAL	335	2	0.0227597	0.0622802	0.0833565	749	0	0.0470358	987	2	86	16	0.00655938	Organelle biogenesis and maintenance	NRF1;NRF1	O-mannose	LGG
TOTAL	71	1	0.0048237	0.0833565	0.0833565	692	0	0.0352173	739	1	53	1	0.00404241	Signaling by PTK6	SFPQ	O-mannose	LGG
TOTAL	71	1	0.0048237	0.0833565	0.0833565	692	0	0.0352173	739	1	53	1	0.00404241	Signaling by Non-Receptor Tyrosine Kinases	SFPQ	O-mannose	LGG
TOTAL	29	2	0.00197024	0.000172857	0.00360865	163	0	0.0088639	186	2	20	14	0.00152544	Response of EIF2AK1 (HRI) to heme deficiency	ATF4;ATF4	O-Fucosylation	LGG
TOTAL	42	2	0.00285345	0.000360865	0.00360865	82	0	0.00557568	117	2	11	8	0.00083899	PERK regulates gene expression	ATF4;ATF4	O-Fucosylation	LGG
TOTAL	87	2	0.00591073	0.00152335	0.0106635	193	0	0.0127716	268	2	32	16	0.0024407	Transcriptional activation of mitochondrial biogenesis	NRF1;NRF1	O-Fucosylation	LGG
TOTAL	115	2	0.00781303	0.00263481	0.0127977	170	0	0.0133435	280	2	16	11	0.00122035	Response of EIF2AK4 (GCN2) to amino acid deficiency	ATF4;ATF4	O-Fucosylation	LGG
TOTAL	127	2	0.0086283	0.00319942	0.0127977	324	0	0.0206348	433	2	36	16	0.00274579	Mitochondrial biogenesis	NRF1;NRF1	O-Fucosylation	LGG
TOTAL	155	2	0.0105306	0.00471757	0.0141527	730	0	0.0412695	866	2	94	9	0.00716955	Unfolded Protein Response (UPR)	ATF4;ATF4	O-Fucosylation	LGG
TOTAL	15	1	0.00101909	0.0101443	0.0229797	104	0	0.00543271	114	1	5	2	0.000381359	ATF6 (ATF6-alpha) activates chaperone genes	ATF4	O-Fucosylation	LGG
TOTAL	17	1	0.00115497	0.0114899	0.0229797	104	0	0.00552802	116	1	10	2	0.000762718	ATF6 (ATF6-alpha) activates chaperones	ATF4	O-Fucosylation	LGG
TOTAL	335	2	0.0227597	0.0206437	0.0294944	749	0	0.0470358	987	2	86	16	0.00655938	Organelle biogenesis and maintenance	NRF1;NRF1	O-Fucosylation	LGG
TOTAL	34	1	0.00230994	0.0228608	0.0294944	80	0	0.00519443	109	1	7	7	0.000533903	ATF4 activates genes in response to endoplasmic reticulum stress	ATF4	O-Fucosylation	LGG
TOTAL	44	1	0.00298933	0.0294944	0.0294944	445	0	0.022398	470	1	14	1	0.00106781	Deactivation of the beta-catenin transactivating complex	SOX3	O-Fucosylation	LGG
TOTAL	700	2	0.0475576	0.0789519	0.0789519	1096	0	0.080204	1683	2	229	20	0.0174662	Cellular responses to stress	ATF4;ATF4	O-Fucosylation	LGG
TOTAL	718	2	0.0487805	0.0825236	0.0825236	1114	0	0.0818242	1717	2	260	20	0.0198307	Cellular responses to external stimuli	ATF4;ATF4	O-Fucosylation	LGG
TOTAL	35	3	0.00237788	6.33297e-05	0.000759956	157	0	0.00862562	181	3	16	5	0.00122035	MAPK targets/ Nuclear events mediated by MAP kinases	FOS;MEF2C;JUN	Type 1 and 2 LacNAc	LGG
TOTAL	10	2	0.000679394	0.000225854	0.00184605	45	0	0.00252573	53	2	8	2	0.000610175	MECP2 regulates transcription factors	MEF2C;MEF2C	Type 1 and 2 LacNAc	LGG
TOTAL	12	2	0.000815273	0.000324348	0.00184605	111	0	0.00557568	117	2	5	4	0.000381359	Activation of the AP-1 family of transcription factors	FOS;JUN	Type 1 and 2 LacNAc	LGG
TOTAL	69	3	0.00468782	0.000461512	0.00184605	190	0	0.0113896	239	3	32	5	0.0024407	MAP kinase activation	FOS;MEF2C;JUN	Type 1 and 2 LacNAc	LGG
TOTAL	77	3	0.00523133	0.000633856	0.00253543	190	0	0.0117709	247	3	35	5	0.00266951	Interleukin-17 signaling	FOS;MEF2C;JUN	Type 1 and 2 LacNAc	LGG
TOTAL	94	3	0.0063863	0.0011247	0.00325484	374	0	0.0204918	430	3	58	5	0.00442377	MyD88 cascade initiated on plasma membrane	FOS;MEF2C;JUN	Type 1 and 2 LacNAc	LGG
TOTAL	94	3	0.0063863	0.0011247	0.00325484	376	0	0.0205395	431	3	59	5	0.00450004	Toll Like Receptor 10 (TLR10) Cascade	FOS;MEF2C;JUN	Type 1 and 2 LacNAc	LGG
TOTAL	94	3	0.0063863	0.0011247	0.00325484	378	0	0.0206824	434	3	59	5	0.00450004	Toll Like Receptor 5 (TLR5) Cascade	FOS;MEF2C;JUN	Type 1 and 2 LacNAc	LGG
TOTAL	101	3	0.00686188	0.00138084	0.00325484	350	0	0.0199199	418	3	48	5	0.00366105	TRAF6 mediated induction of NFkB and MAP kinases upon TLR7/8 or 9 activation	FOS;MEF2C;JUN	Type 1 and 2 LacNAc	LGG
TOTAL	102	3	0.00692982	0.00142018	0.00325484	406	0	0.0219215	460	3	61	5	0.00465258	Toll Like Receptor 3 (TLR3) Cascade	FOS;MEF2C;JUN	Type 1 and 2 LacNAc	LGG
TOTAL	102	3	0.00692982	0.00142018	0.00325484	383	0	0.0212543	446	3	63	5	0.00480513	MyD88 dependent cascade initiated on endosome	FOS;MEF2C;JUN	Type 1 and 2 LacNAc	LGG
TOTAL	104	3	0.0070657	0.00150094	0.00325484	383	0	0.0213496	448	3	66	5	0.00503394	Toll Like Receptor 7/8 (TLR7/8) Cascade	FOS;MEF2C;JUN	Type 1 and 2 LacNAc	LGG
TOTAL	107	3	0.00726952	0.00162742	0.00325484	436	0	0.0236847	497	3	58	5	0.00442377	TRIF(TICAM1)-mediated TLR4 signaling	FOS;MEF2C;JUN	Type 1 and 2 LacNAc	LGG
TOTAL	107	3	0.00726952	0.00162742	0.00325484	437	0	0.0236847	497	3	60	5	0.00457631	MyD88-independent TLR4 cascade	FOS;MEF2C;JUN	Type 1 and 2 LacNAc	LGG
TOTAL	107	3	0.00726952	0.00162742	0.00325484	387	0	0.0216832	455	3	68	5	0.00518648	Toll Like Receptor 9 (TLR9) Cascade	FOS;MEF2C;JUN	Type 1 and 2 LacNAc	LGG
TOTAL	111	3	0.00754127	0.00180619	0.00361238	470	0	0.0256386	538	3	64	5	0.0048814	MyD88:MAL(TIRAP) cascade initiated on plasma membrane	FOS;MEF2C;JUN	Type 1 and 2 LacNAc	LGG
TOTAL	111	3	0.00754127	0.00180619	0.00361238	474	0	0.0258292	542	3	66	5	0.00503394	Toll Like Receptor TLR6:TLR2 Cascade	FOS;MEF2C;JUN	Type 1 and 2 LacNAc	LGG
TOTAL	29	2	0.00197024	0.00185113	0.00370226	171	0	0.00919748	193	2	12	2	0.000915262	Estrogen-dependent nuclear events downstream of ESR-membrane signaling	FOS;FOS	Type 1 and 2 LacNAc	LGG
TOTAL	114	3	0.00774509	0.00194803	0.00389605	471	0	0.0258292	542	3	66	5	0.00503394	Toll Like Receptor TLR1:TLR2 Cascade	FOS;MEF2C;JUN	Type 1 and 2 LacNAc	LGG
TOTAL	114	3	0.00774509	0.00194803	0.00389605	474	0	0.0259722	545	3	68	5	0.00518648	Toll Like Receptor 2 (TLR2) Cascade	FOS;MEF2C;JUN	Type 1 and 2 LacNAc	LGG
TOTAL	144	3	0.00978327	0.00375693	0.00751386	594	0	0.0323103	678	3	95	5	0.00724582	Toll Like Receptor 4 (TLR4) Cascade	FOS;MEF2C;JUN	Type 1 and 2 LacNAc	LGG
TOTAL	185	3	0.0125688	0.0075017	0.0150034	658	0	0.0371235	779	3	185	5	0.0141103	Toll-like Receptor Cascades	FOS;MEF2C;JUN	Type 1 and 2 LacNAc	LGG
TOTAL	80	2	0.00543515	0.01315	0.0262999	319	0	0.0184426	387	2	48	3	0.00366105	Nuclear Events (kinase and transcription factor activation)	FOS;MEF2C	Type 1 and 2 LacNAc	LGG
TOTAL	89	2	0.00604661	0.0160794	0.0321587	119	0	0.00953107	200	2	17	2	0.00129662	TP53 Regulates Transcription of DNA Repair Genes	FOS;JUN	Type 1 and 2 LacNAc	LGG
TOTAL	91	2	0.00618249	0.016765	0.03353	47	0	0.00648113	136	2	22	4	0.00167798	Senescence-Associated Secretory Phenotype (SASP)	FOS;JUN	Type 1 and 2 LacNAc	LGG
TOTAL	256	3	0.0173925	0.0179186	0.0358373	1051	0	0.0599028	1257	3	110	4	0.0083899	ESR-mediated signaling	FOS;FOS;JUN	Type 1 and 2 LacNAc	LGG
TOTAL	100	2	0.00679394	0.020002	0.0386146	359	0	0.0214449	450	2	77	2	0.00587293	Transcriptional Regulation by MECP2	MEF2C;MEF2C	Type 1 and 2 LacNAc	LGG
TOTAL	110	2	0.00747333	0.0238799	0.0386146	326	0	0.0200152	420	2	38	2	0.00289833	Extra-nuclear estrogen signaling	FOS;FOS	Type 1 and 2 LacNAc	LGG
TOTAL	114	2	0.00774509	0.0255111	0.0386146	258	0	0.016727	351	2	40	5	0.00305087	Oxidative Stress Induced Senescence	FOS;JUN	Type 1 and 2 LacNAc	LGG
TOTAL	116	2	0.00788097	0.0263434	0.0386146	632	0	0.0350267	735	2	43	4	0.00327969	Activation of HOX genes during differentiation	MAFB;JUN	Type 1 and 2 LacNAc	LGG
TOTAL	116	2	0.00788097	0.0263434	0.0386146	632	0	0.0350267	735	2	43	4	0.00327969	Activation of anterior HOX genes in hindbrain development during early embryogenesis	MAFB;JUN	Type 1 and 2 LacNAc	LGG
TOTAL	124	2	0.00842449	0.0297817	0.0386146	241	0	0.0169177	355	2	20	3	0.00152544	FCERI mediated MAPK activation	FOS;JUN	Type 1 and 2 LacNAc	LGG
TOTAL	143	2	0.00971533	0.0386146	0.0386146	662	0	0.0368852	774	2	102	3	0.00777973	Signaling by NTRK1 (TRKA)	FOS;MEF2C	Type 1 and 2 LacNAc	LGG
TOTAL	20	1	0.00135879	0.0425778	0.0425778	108	0	0.00600457	126	1	9	1	0.000686446	WNT5:FZD7-mediated leishmania damping	JUN	Type 1 and 2 LacNAc	LGG
TOTAL	20	1	0.00135879	0.0425778	0.0425778	108	0	0.00600457	126	1	9	1	0.000686446	Killing mechanisms	JUN	Type 1 and 2 LacNAc	LGG
TOTAL	154	2	0.0104627	0.0441317	0.0441317	847	0	0.0461304	968	2	66	2	0.00503394	Estrogen-dependent gene expression	FOS;JUN	Type 1 and 2 LacNAc	LGG
TOTAL	647	4	0.0439568	0.0503855	0.0503855	1886	0	0.111275	2335	4	493	6	0.037602	Signaling by Interleukins	FOS;FOS;MEF2C;JUN	Type 1 and 2 LacNAc	LGG
TOTAL	166	2	0.0112779	0.0504645	0.0504645	880	0	0.0478936	1005	2	164	3	0.0125086	Signaling by NTRKs	FOS;MEF2C	Type 1 and 2 LacNAc	LGG
TOTAL	385	3	0.0261567	0.0505349	0.0505349	1273	0	0.0759626	1594	3	191	4	0.0145679	Signaling by Nuclear Receptors	FOS;FOS;JUN	Type 1 and 2 LacNAc	LGG
TOTAL	25	1	0.00169848	0.0529446	0.0529446	0	0	0.00119138	25	1	7	2	0.000533903	Insertion of tail-anchored proteins into the endoplasmic reticulum membrane	CHD5	Type 1 and 2 LacNAc	LGG
TOTAL	26	1	0.00176642	0.0550049	0.0550049	29	0	0.00257339	54	1	7	1	0.000533903	ERK/MAPK targets	MEF2C	Type 1 and 2 LacNAc	LGG
TOTAL	30	1	0.00203818	0.0632027	0.0632027	852	0	0.0414125	869	1	22	1	0.00167798	Neurodegenerative Diseases	JUN	Type 1 and 2 LacNAc	LGG
TOTAL	30	1	0.00203818	0.0632027	0.0632027	852	0	0.0414125	869	1	22	1	0.00167798	Deregulated CDK5 triggers multiple neurodegenerative pathways in Alzheimer's disease models	JUN	Type 1 and 2 LacNAc	LGG
TOTAL	32	1	0.00217406	0.0672758	0.0672758	101	0	0.0061952	130	1	14	2	0.00106781	Myogenesis	MEF2C	Type 1 and 2 LacNAc	LGG
TOTAL	200	2	0.0135879	0.0700213	0.0700213	551	0	0.0332158	697	2	90	9	0.00686446	Cellular Senescence	FOS;JUN	Type 1 and 2 LacNAc	LGG
TOTAL	37	1	0.00251376	0.0773834	0.0773834	852	0	0.0416508	874	1	24	1	0.00183052	Diseases of programmed cell death	JUN	Type 1 and 2 LacNAc	LGG
TOTAL	216	2	0.0146749	0.0799624	0.0799624	143	0	0.0165364	347	2	47	1	0.00358478	Interleukin-4 and Interleukin-13 signaling	FOS;FOS	Type 1 and 2 LacNAc	LGG
TOTAL	235	2	0.0159658	0.0923052	0.0923052	442	0	0.0304518	639	2	63	3	0.00480513	Fc epsilon receptor (FCERI) signaling	FOS;JUN	Type 1 and 2 LacNAc	LGG
TOTAL	10	2	0.000679394	0.000225854	0.0205527	45	0	0.00252573	53	2	8	2	0.000610175	MECP2 regulates transcription factors	MEF2C;MEF2C	sialylation	LGG
TOTAL	71	3	0.0048237	0.000501339	0.0225602	333	0	0.0186809	392	3	27	18	0.00205934	Transcriptional regulation of granulopoiesis	CEBPA;CEBPA	sialylation	LGG
TOTAL	32	2	0.00217406	0.0022448	0.067344	101	0	0.0061952	130	2	14	2	0.00106781	Myogenesis	MEF2C;MEF2D	sialylation	LGG
TOTAL	44	3	0.00298933	0.000162747	0.0104158	423	0	0.0212543	446	3	27	4	0.00205934	SUMOylation of transcription cofactors	CTBP1;PCGF2;PIAS4	sulfotransferases	LGG
TOTAL	183	4	0.0124329	0.000919557	0.0230481	1665	0	0.0836352	1755	4	131	27	0.00999161	SUMO E3 ligases SUMOylate target proteins	RARA;CTBP1;PCGF2;PIAS4	sulfotransferases	LGG
TOTAL	192	4	0.0130444	0.00109753	0.0230481	1702	0	0.0854937	1794	4	140	27	0.0106781	SUMOylation	RARA;CTBP1;PCGF2;PIAS4	sulfotransferases	LGG
TOTAL	39	2	0.00264964	0.00394132	0.0496784	59	0	0.0044796	94	2	5	1	0.000381359	RUNX1 interacts with co-factors whose precise effect on RUNX1 targets is not known	SMARCB1;SMARCA4	sulfotransferases	LGG
TOTAL	40	2	0.00271758	0.00413987	0.0496784	548	0	0.0274018	575	2	25	6	0.0019068	SUMOylation of intracellular receptors	RARA;PIAS4	sulfotransferases	LGG
TOTAL	3	1	0.000203818	0.00710897	0.0641618	0	0	0.000142966	3	1	1	1	7.62718e-05	TCF7L2 mutants don't bind CTBP	CTBP1	sulfotransferases	LGG
TOTAL	53	2	0.00360079	0.00712909	0.0641618	278	0	0.0150591	316	2	22	3	0.00167798	RMTs methylate histone arginines	SMARCB1;SMARCA4	sulfotransferases	LGG
TOTAL	71	3	0.0048237	5.99647e-05	0.000539682	333	0	0.0186809	392	3	27	18	0.00205934	Transcriptional regulation of granulopoiesis	CEBPA;CEBPA	CS-DS extension	LIHC
TOTAL	108	2	0.00733745	0.00603361	0.0241344	414	0	0.0236847	497	2	18	5	0.00137289	Transcriptional regulation of white adipocyte differentiation	CEBPA;CEBPA	CS-DS extension	LIHC
TOTAL	10	1	0.000679394	0.0108151	0.0324453	13	0	0.00100076	21	1	7	1	0.000533903	POU5F1 (OCT4), SOX2, NANOG repress genes related to differentiation	GATA6	CS-DS extension	LIHC
TOTAL	1243	4	0.0844487	0.040596	0.0478106	2923	0	0.182377	3827	4	538	24	0.0410342	Developmental Biology	CEBPA;GATA6;CEBPA	CS-DS extension	LIHC
TOTAL	45	1	0.00305727	0.0478106	0.0478106	227	0	0.0127716	268	1	35	1	0.00266951	Transcriptional regulation of pluripotent stem cells	GATA6	CS-DS extension	LIHC
TOTAL	52	1	0.00353285	0.0550523	0.0550523	50	0	0.00476554	100	1	29	3	0.00221188	Surfactant metabolism	GATA6	CS-DS extension	LIHC
TOTAL	17	2	0.00115497	2.79054e-05	0.000111622	104	0	0.00552802	116	2	10	1	0.000762718	ATF6 (ATF6-alpha) activates chaperones	DDIT3;DDIT3	fucosylation	LIHC
TOTAL	155	3	0.0105306	3.95972e-05	0.000118792	730	0	0.0412695	866	3	94	2	0.00716955	Unfolded Protein Response (UPR)	DDIT3;CEBPG;DDIT3	fucosylation	LIHC
TOTAL	35	2	0.00237788	0.000117803	0.000318805	126	0	0.00752955	158	2	12	5	0.000915262	Regulation of gene expression in beta cells	PDX1;PDX1	fucosylation	LIHC
TOTAL	700	4	0.0475576	0.000159402	0.000318805	1096	0	0.080204	1683	4	229	11	0.0174662	Cellular responses to stress	DDIT3;CEBPG;DDIT3	fucosylation	LIHC
TOTAL	718	4	0.0487805	0.000175906	0.000351811	1114	0	0.0818242	1717	4	260	11	0.0198307	Cellular responses to external stimuli	DDIT3;CEBPG;DDIT3	fucosylation	LIHC
TOTAL	67	2	0.00455194	0.000428566	0.000857132	149	0	0.0101029	212	2	26	8	0.00198307	Regulation of beta-cell development	PDX1;PDX1	fucosylation	LIHC
TOTAL	23	1	0.00156261	0.0108871	0.0217742	153	0	0.00824438	173	1	15	2	0.00114408	FOXO-mediated transcription of cell death genes	DDIT3	fucosylation	LIHC
TOTAL	31	1	0.00210612	0.01465	0.0267949	8	0	0.0018109	38	1	4	2	0.000305087	Regulation of pyruvate dehydrogenase (PDH) complex	PDX1	fucosylation	LIHC
TOTAL	57	1	0.00387255	0.0267949	0.0267949	33	0	0.00419367	88	1	15	3	0.00114408	Pyruvate metabolism	PDX1	fucosylation	LIHC
TOTAL	72	1	0.00489164	0.033743	0.033743	11	0	0.00395539	83	1	21	1	0.00160171	Signaling by Retinoic Acid	PDX1	fucosylation	LIHC
TOTAL	72	1	0.00489164	0.033743	0.033743	45	0	0.00557568	117	1	23	1	0.00175425	Glyoxylate metabolism and glycine degradation	PDX1	fucosylation	LIHC
TOTAL	98	1	0.00665806	0.0456858	0.0456858	72	0	0.00791079	166	1	36	3	0.00274579	Pyruvate metabolism and Citric Acid (TCA) cycle	PDX1	fucosylation	LIHC
TOTAL	110	1	0.00747333	0.051155	0.051155	494	0	0.0277831	583	1	85	2	0.00648311	FOXO-mediated transcription	DDIT3	fucosylation	LIHC
TOTAL	2355	3	0.159997	0.0866215	0.0866215	3871	0	0.267347	5610	3	892	2	0.0680345	Metabolism of proteins	DDIT3;CEBPG;DDIT3	fucosylation	LIHC
TOTAL	2355	5	0.159997	0.000545215	0.000545215	3871	0	0.267347	5610	5	892	9	0.0680345	Metabolism of proteins	DDIT3;CEBPG;ATF4;DDIT3;ATF4	ABO blood group	LIHC
TOTAL	23	1	0.00156261	0.00933909	0.00933909	153	0	0.00824438	173	1	15	2	0.00114408	FOXO-mediated transcription of cell death genes	DDIT3	ABO blood group	LIHC
TOTAL	110	1	0.00747333	0.0440105	0.0440105	494	0	0.0277831	583	1	85	2	0.00648311	FOXO-mediated transcription	DDIT3	ABO blood group	LIHC
TOTAL	71	3	0.0048237	3.92598e-05	0.000549637	333	0	0.0186809	392	3	27	18	0.00205934	Transcriptional regulation of granulopoiesis	CEBPA;CEBPA	sulfotransferases	LIHC
TOTAL	108	2	0.00733745	0.00462023	0.0302227	414	0	0.0236847	497	2	18	5	0.00137289	Transcriptional regulation of white adipocyte differentiation	CEBPA;CEBPA	sulfotransferases	LIHC
TOTAL	11	1	0.000747333	0.010412	0.0302227	136	0	0.00676706	142	1	12	5	0.000915262	Interleukin-23 signaling	STAT4	sulfotransferases	LIHC
TOTAL	12	1	0.000815273	0.0113535	0.0302227	1	0	0.00061952	13	1	5	2	0.000381359	Interleukin-21 signaling	STAT4	sulfotransferases	LIHC
TOTAL	16	1	0.00108703	0.0151114	0.0302227	174	0	0.00876859	184	1	26	9	0.00198307	Interleukin-35 Signalling	STAT4	sulfotransferases	LIHC
TOTAL	29	1	0.00197024	0.0272329	0.0544658	183	0	0.00962638	202	1	56	3	0.00427122	Interleukin-20 family signaling	STAT4	sulfotransferases	LIHC
TOTAL	52	1	0.00353285	0.04834	0.0672395	405	0	0.0205395	431	1	59	2	0.00450004	Interleukin-2 family signaling	STAT4	sulfotransferases	LIHC
TOTAL	73	1	0.00495958	0.0672395	0.0672395	345	0	0.0195864	411	1	36	36	0.00274579	Gene and protein expression by JAK-STAT signaling after Interleukin-12 stimulation	STAT4	sulfotransferases	LIHC
TOTAL	84	1	0.00570691	0.0769996	0.0769996	416	0	0.0232082	487	1	56	41	0.00427122	Interleukin-12 signaling	STAT4	sulfotransferases	LIHC
TOTAL	96	1	0.00652218	0.0875387	0.0875387	597	0	0.032215	676	1	114	55	0.00869499	Interleukin-12 family signaling	STAT4	sulfotransferases	LIHC
TOTAL	46	4	0.00312479	3.19675e-06	0.000457135	386	0	0.0185989	407	4	33	10	0.00249452	Transcriptional Regulation by E2F6	E2F1;BRCA1;BRCA1;E2F1	GPI_Anchor	LUAD
TOTAL	89	4	0.00604578	4.19601e-05	0.00297917	120	0	0.00918521	201	4	17	3	0.00128506	TP53 Regulates Transcription of DNA Repair Genes	BRCA1;BRCA1;CDK9	GPI_Anchor	LUAD
TOTAL	486	6	0.0330141	0.000559604	0.0249482	1758	0	0.0966961	2116	6	259	6	0.0195782	Transcriptional Regulation by TP53	E2F1;BRCA1;BRCA1;E2F1;CDK9	GPI_Anchor	LUAD
TOTAL	20	2	0.0013586	0.000891006	0.0249482	74	0	0.00388429	85	2	8	3	0.000604732	Transcription of E2F targets under negative control by p107 (RBL1) and p130 (RBL2) in complex with HDAC1	E2F1;E2F1	GPI_Anchor	LUAD
TOTAL	20	2	0.0013586	0.000891006	0.0249482	117	0	0.00589499	129	2	17	2	0.00128506	TP53 Regulates Transcription of Genes Involved in G1 Cell Cycle Arrest	E2F1;E2F1	GPI_Anchor	LUAD
TOTAL	25	2	0.00169825	0.0013828	0.0318043	104	0	0.00575789	126	2	12	5	0.000907098	Transcription of E2F targets under negative control by DREAM complex	E2F1;E2F1	GPI_Anchor	LUAD
TOTAL	38	2	0.00258135	0.00313909	0.0607374	294	0	0.0142119	311	2	27	7	0.00204097	G0 and Early G1	E2F1;E2F1	GPI_Anchor	LUAD
TOTAL	2	1	0.00013586	0.00433839	0.0607374	27	0	0.00127953	28	1	1	1	7.55915e-05	Defective DNA double strand break response due to BRCA1 loss of function	BRCA1	GPI_Anchor	LUAD
TOTAL	2	1	0.00013586	0.00433839	0.0607374	45	0	0.00205639	45	1	1	1	7.55915e-05	Defective DNA double strand break response due to BARD1 loss of function	BRCA1	GPI_Anchor	LUAD
TOTAL	2	1	0.00013586	0.00433839	0.0607374	71	0	0.00324453	71	1	2	2	0.000151183	Diseases of DNA Double-Strand Break Repair	BRCA1	GPI_Anchor	LUAD
TOTAL	3	1	0.000203791	0.00650074	0.0845096	54	0	0.00246767	54	1	2	2	0.000151183	Interactions of Tat with host cellular proteins	CDK9	GPI_Anchor	LUAD
TOTAL	65	2	0.00441546	0.00885588	0.0974147	358	0	0.0183247	401	2	42	2	0.00317484	TP53 Regulates Transcription of Cell Cycle Genes	E2F1;E2F1	GPI_Anchor	LUAD
TOTAL	10	2	0.000679302	7.00923e-05	0.00651859	47	0	0.00251337	55	2	8	2	0.000604732	MECP2 regulates transcription factors	MEF2C;MEF2C	LacdiNAc	LUAD
TOTAL	100	2	0.00679302	0.00656768	0.0862311	1159	0	0.0570306	1248	2	77	2	0.00582055	Transcriptional Regulation by MECP2	MEF2C;MEF2C	LacdiNAc	LUAD
TOTAL	10	1	0.000679302	0.0121571	0.0862311	5	0	0.000685464	15	1	5	2	0.000377958	Activation of PUMA and translocation to mitochondria	TP63	LacdiNAc	LUAD
TOTAL	10	1	0.000679302	0.0121571	0.0862311	14	0	0.00100535	22	1	7	1	0.000529141	POU5F1 (OCT4), SOX2, NANOG repress genes related to differentiation	GATA6	LacdiNAc	LUAD
TOTAL	17	1	0.00115481	0.0205838	0.0862311	162	0	0.00808847	177	1	11	2	0.000831507	Regulation of TP53 Activity through Association with Co-factors	TP63	LacdiNAc	LUAD
TOTAL	18	1	0.00122274	0.0217821	0.0862311	24	0	0.00178221	39	1	7	2	0.000529141	TP53 Regulates Transcription of Death Receptors and Ligands	TP63	LacdiNAc	LUAD
TOTAL	20	1	0.0013586	0.0241745	0.0862311	275	0	0.0131609	288	1	17	2	0.00128506	TP53 Regulates Transcription of Caspase Activators and Caspases	TP63	LacdiNAc	LUAD
TOTAL	26	1	0.00176618	0.0313185	0.0862311	32	0	0.00260476	57	1	7	1	0.000529141	ERK/MAPK targets	MEF2C	LacdiNAc	LUAD
TOTAL	28	1	0.00190204	0.0336889	0.0862311	133	0	0.00712882	156	1	19	4	0.00143624	TP53 regulates transcription of several additional cell death genes whose specific roles in p53-dependent apoptosis remain uncertain	TP63	LacdiNAc	LUAD
TOTAL	32	1	0.00217377	0.0384131	0.0862311	103	0	0.00603208	132	1	14	2	0.00105828	Myogenesis	MEF2C	LacdiNAc	LUAD
TOTAL	33	1	0.0022417	0.0395908	0.0862311	134	0	0.00740301	162	1	25	4	0.00188979	TP53 Regulates Transcription of Genes Involved in Cytochrome C Release	TP63	LacdiNAc	LUAD
TOTAL	35	1	0.00237756	0.041942	0.0862311	205	0	0.0104647	229	1	16	1	0.00120946	MAPK targets/ Nuclear events mediated by MAP kinases	MEF2C	LacdiNAc	LUAD
TOTAL	36	1	0.00244549	0.0431156	0.0862311	74	0	0.00447836	98	1	19	2	0.00143624	Activation of BH3-only proteins	TP63	LacdiNAc	LUAD
TOTAL	45	1	0.00305686	0.0536168	0.0934292	231	0	0.0124297	272	1	35	1	0.0026457	Transcriptional regulation of pluripotent stem cells	GATA6	LacdiNAc	LUAD
TOTAL	52	1	0.00353237	0.0617091	0.0934292	50	0	0.00456976	100	1	29	3	0.00219215	Surfactant metabolism	GATA6	LacdiNAc	LUAD
TOTAL	61	1	0.00414374	0.0720174	0.0934292	305	0	0.0152173	333	1	62	2	0.00468667	Intrinsic Pathway for Apoptosis	TP63	LacdiNAc	LUAD
TOTAL	69	1	0.00468718	0.0810905	0.0934292	238	0	0.0131152	287	1	32	1	0.00241893	MAP kinase activation	MEF2C	LacdiNAc	LUAD
TOTAL	77	1	0.00523062	0.0900797	0.0934292	239	0	0.0135265	296	1	35	1	0.0026457	Interleukin-17 signaling	MEF2C	LacdiNAc	LUAD
TOTAL	80	1	0.00543441	0.0934292	0.0934292	350	0	0.0191016	418	1	48	1	0.00362839	Nuclear Events (kinase and transcription factor activation)	MEF2C	LacdiNAc	LUAD
TOTAL	83	1	0.0056382	0.0967671	0.0967671	520	0	0.0266874	584	1	68	12	0.00514022	TP53 Regulates Transcription of Cell Death Genes	TP63	LacdiNAc	LUAD
TOTAL	191	2	0.0129747	0.00243903	0.0171879	207	0	0.017685	387	2	22	2	0.00166301	Interferon alpha/beta signaling	IRF4;IRF4	SA_paths	LUAD
TOTAL	216	2	0.0146729	0.00310513	0.0171879	153	0	0.016314	357	2	47	1	0.0035528	Interleukin-4 and Interleukin-13 signaling	IRF4;IRF4	SA_paths	LUAD
TOTAL	9	1	0.000611372	0.00366263	0.0171879	0	0	0.000411278	9	1	2	1	0.000151183	Phase 3 - rapid repolarisation	ERG	SA_paths	LUAD
TOTAL	255	2	0.0173222	0.00429698	0.0171879	230	0	0.021615	473	2	16	2	0.00120946	Interferon gamma signaling	IRF4;IRF4	SA_paths	LUAD
TOTAL	401	2	0.02724	0.0103462	0.0310385	673	0	0.0472056	1033	2	69	4	0.00521581	Interferon Signaling	IRF4;IRF4	SA_paths	LUAD
TOTAL	34	1	0.00230963	0.013778	0.034797	237	0	0.0122926	269	1	24	3	0.0018142	RUNX2 regulates osteoblast differentiation	MAF	SA_paths	LUAD
TOTAL	43	1	0.002921	0.0173985	0.034797	278	0	0.014349	314	1	32	3	0.00241893	RUNX2 regulates bone development	MAF	SA_paths	LUAD
TOTAL	44	1	0.00298893	0.0178001	0.0356002	0	0	0.00201069	44	1	1	1	7.55915e-05	Voltage gated Potassium channels	ERG	SA_paths	LUAD
TOTAL	647	2	0.0439508	0.0257432	0.0428263	2096	0	0.116072	2540	2	493	1	0.0372666	Signaling by Interleukins	IRF4;IRF4	SA_paths	LUAD
TOTAL	107	1	0.00726853	0.0428263	0.0428263	22	0	0.00584929	128	1	19	1	0.00143624	Potassium Channels	ERG	SA_paths	LUAD
TOTAL	143	1	0.00971401	0.0568869	0.0568869	105	0	0.0112873	247	1	27	1	0.00204097	Cardiac conduction	ERG	SA_paths	LUAD
TOTAL	147	1	0.00998573	0.0584385	0.0584385	567	0	0.0314856	689	1	84	3	0.00634969	Transcriptional regulation by RUNX2	MAF	SA_paths	LUAD
TOTAL	1108	2	0.0752666	0.0693075	0.0693075	2824	0	0.165288	3617	2	687	5	0.0519314	Cytokine Signaling in Immune system	IRF4;IRF4	SA_paths	LUAD
TOTAL	224	1	0.0152164	0.0878947	0.0878947	199	0	0.0189188	414	1	42	1	0.00317484	Muscle contraction	ERG	SA_paths	LUAD
TOTAL	87	3	0.00590992	0.00138006	0.0979841	257	0	0.0151716	332	3	32	16	0.00241893	Transcriptional activation of mitochondrial biogenesis	NRF1;RXRA;NRF1	O_mannose	LUAD
TOTAL	5	2	0.000339651	2.18298e-05	0.000109149	0	0	0.000228488	5	2	2	2	0.000151183	Loss of MECP2 binding ability to 5mC-DNA	MECP2	HS_Extend	LUAD
TOTAL	6	2	0.000407581	3.14093e-05	0.000125637	45	0	0.00233058	51	2	4	4	0.000302366	MECP2 regulates transcription of genes involved in GABA signaling	MECP2	HS_Extend	LUAD
TOTAL	7	2	0.000475511	4.27167e-05	0.00012815	0	0	0.000319883	7	2	1	1	7.55915e-05	Loss of phosphorylation of MECP2 at T308	MECP2	HS_Extend	LUAD
TOTAL	8	2	0.000543441	5.57478e-05	0.000167243	0	0	0.000365581	8	2	1	1	7.55915e-05	Loss of MECP2 binding ability to the NCoR/SMRT complex	MECP2	HS_Extend	LUAD
TOTAL	10	2	0.000679302	8.6964e-05	0.000173928	47	0	0.00251337	55	2	8	8	0.000604732	MECP2 regulates transcription factors	MECP2	HS_Extend	LUAD
TOTAL	13	2	0.000883092	0.00014661	0.000221542	12	0	0.00114244	25	2	8	8	0.000604732	MECP2 regulates transcription of neuronal ligands	MECP2	HS_Extend	LUAD
TOTAL	16	2	0.00108688	0.000221542	0.000221542	0	0	0.000731161	16	2	5	5	0.000377958	Pervasive developmental disorders	MECP2	HS_Extend	LUAD
TOTAL	16	2	0.00108688	0.000221542	0.000221542	0	0	0.000731161	16	2	5	5	0.000377958	Disorders of Nervous System Development	MECP2	HS_Extend	LUAD
TOTAL	16	2	0.00108688	0.000221542	0.000221542	0	0	0.000731161	16	2	5	5	0.000377958	Loss of function of MECP2 in Rett syndrome	MECP2	HS_Extend	LUAD
TOTAL	16	2	0.00108688	0.000221542	0.000221542	0	0	0.000731161	16	2	5	5	0.000377958	Disorders of Developmental Biology	MECP2	HS_Extend	LUAD
TOTAL	32	2	0.00217377	0.000874701	0.000874701	113	0	0.00653475	143	2	26	26	0.00196538	MECP2 regulates neuronal receptors and channels	MECP2	HS_Extend	LUAD
TOTAL	1554	5	0.105563	0.0526358	0.0526358	4640	0	0.260019	5690	5	824	75	0.0622874	Generic Transcription Pathway	MECP2;MECP2;NR2C2	HS_Extend	LUAD
TOTAL	1693	5	0.115006	0.0714014	0.0714014	4802	0	0.270621	5922	5	885	75	0.0668985	RNA Polymerase II Transcription	MECP2;MECP2;NR2C2	HS_Extend	LUAD
TOTAL	71	1	0.00482304	0.0921664	0.0921664	368	0	0.0195129	427	1	27	2	0.00204097	Transcriptional regulation of granulopoiesis	FLI1	HS_Extend	LUAD
TOTAL	1851	5	0.125739	0.0969081	0.0969081	4993	0	0.282822	6189	5	996	75	0.0752891	Gene expression (Transcription)	MECP2;MECP2;NR2C2	HS_Extend	LUAD
TOTAL	4	2	0.000271721	2.98296e-05	0.00366904	0	0	0.00018279	4	2	2	2	0.000151183	RUNX3 regulates RUNX1-mediated transcription	RUNX1	GalNAc_Olinked	LUAD
TOTAL	10	2	0.000679302	0.000185073	0.0112895	47	0	0.00251337	55	2	8	2	0.000604732	MECP2 regulates transcription factors	MEF2C;MEF2C	GalNAc_Olinked	LUAD
TOTAL	100	3	0.00679302	0.00100353	0.0411447	1159	0	0.0570306	1248	3	77	4	0.00582055	Transcriptional Regulation by MECP2	MEF2C;SOX2;MEF2C	GalNAc_Olinked	LUAD
TOTAL	118	3	0.00801576	0.00161013	0.044279	415	0	0.0231687	507	3	47	4	0.0035528	Transcriptional regulation by RUNX3	RUNX1;RUNX1	GalNAc_Olinked	LUAD
TOTAL	32	2	0.00217377	0.00184496	0.044279	148	0	0.00799708	175	2	19	18	0.00143624	Regulation of RUNX1 Expression and Activity	RUNX1;RUNX1	GalNAc_Olinked	LUAD
TOTAL	45	2	0.00305686	0.00359117	0.0718233	231	0	0.0124297	272	2	35	28	0.0026457	Transcriptional regulation of pluripotent stem cells	SOX2;SOX2	GalNAc_Olinked	LUAD
TOTAL	89	3	0.00604578	0.000141023	0.00851211	158	0	0.0110588	242	3	28	12	0.00211656	Pre-NOTCH Transcription and Translation	NOTCH1;NOTCH1	N_linked_branching	LUAD
TOTAL	113	3	0.00767611	0.000283737	0.00851211	197	0	0.0139378	305	3	38	22	0.00287248	Pre-NOTCH Expression and Processing	NOTCH1;NOTCH1	N_linked_branching	LUAD
TOTAL	32	2	0.00217377	0.000628824	0.0125765	113	0	0.00653475	143	2	26	2	0.00196538	MECP2 regulates neuronal receptors and channels	NOTCH1	N_linked_branching	LUAD
TOTAL	258	3	0.017526	0.00304494	0.0456741	753	0	0.0441896	967	3	154	61	0.0116411	Signaling by NOTCH	NOTCH1;NOTCH1	N_linked_branching	LUAD
TOTAL	100	2	0.00679302	0.00586427	0.0483443	1159	0	0.0570306	1248	2	77	2	0.00582055	Transcriptional Regulation by MECP2	NOTCH1	N_linked_branching	LUAD
TOTAL	6	1	0.000407581	0.00690633	0.0483443	25	0	0.00141662	31	1	1	1	7.55915e-05	FBXW7 Mutants and NOTCH1 in Cancer	NOTCH1	N_linked_branching	LUAD
TOTAL	6	1	0.000407581	0.00690633	0.0483443	25	0	0.00141662	31	1	1	1	7.55915e-05	Loss of Function of FBXW7 in Cancer and NOTCH1 Signaling	NOTCH1	N_linked_branching	LUAD
TOTAL	6	1	0.000407581	0.00690633	0.0483443	0	0	0.000274185	6	1	1	1	7.55915e-05	Defective LFNG causes SCDO3	NOTCH1	N_linked_branching	LUAD
TOTAL	8	1	0.000543441	0.00919845	0.0551907	29	0	0.00159942	35	1	5	5	0.000377958	Constitutive Signaling by NOTCH1 t(7;9)(NOTCH1:M1580_K2555) Translocation Mutant	NOTCH1	N_linked_branching	LUAD
TOTAL	8	1	0.000543441	0.00919845	0.0551907	29	0	0.00159942	35	1	5	5	0.000377958	Signaling by NOTCH1 t(7;9)(NOTCH1:M1580_K2555) Translocation Mutant	NOTCH1	N_linked_branching	LUAD
TOTAL	10	1	0.000679302	0.0114856	0.0574279	7	0	0.000776859	17	1	2	2	0.000151183	Pre-NOTCH Processing in the Endoplasmic Reticulum	NOTCH1	N_linked_branching	LUAD
TOTAL	16	1	0.00108688	0.0183172	0.0703149	29	0	0.001965	43	1	6	6	0.000453549	Constitutive Signaling by NOTCH1 HD Domain Mutants	NOTCH1	N_linked_branching	LUAD
TOTAL	16	1	0.00108688	0.0183172	0.0703149	29	0	0.001965	43	1	6	6	0.000453549	Signaling by NOTCH1 HD Domain Mutants in Cancer	NOTCH1	N_linked_branching	LUAD
TOTAL	16	1	0.00108688	0.0183172	0.0703149	11	0	0.00114244	25	1	7	5	0.000529141	RUNX3 regulates NOTCH signaling	NOTCH1	N_linked_branching	LUAD
TOTAL	20	1	0.0013586	0.0228469	0.0703149	21	0	0.0018736	41	1	4	1	0.000302366	Regulation of gene expression in late stage (branching morphogenesis) pancreatic bud precursor cells	NOTCH1	N_linked_branching	LUAD
TOTAL	21	1	0.00142653	0.0239763	0.0703149	623	0	0.029018	635	1	18	2	0.00136065	TFAP2 (AP-2) family regulates transcription of growth factors and their receptors	YY1	N_linked_branching	LUAD
TOTAL	23	1	0.00156239	0.0262313	0.0703149	33	0	0.00255906	56	1	8	8	0.000604732	Pre-NOTCH Processing in Golgi	NOTCH1	N_linked_branching	LUAD
TOTAL	26	1	0.00176618	0.0296046	0.0703149	109	0	0.00594068	130	1	9	1	0.000680324	NOTCH4 Intracellular Domain Regulates Transcription	NOTCH1	N_linked_branching	LUAD
TOTAL	28	1	0.00190204	0.0318474	0.0703149	23	0	0.00233058	51	1	4	4	0.000302366	RNA Polymerase III Transcription Initiation From Type 3 Promoter	SNAPC1	N_linked_branching	LUAD
TOTAL	28	1	0.00190204	0.0318474	0.0703149	176	0	0.00900242	197	1	2	1	0.000151183	Notch-HLH transcription pathway	NOTCH1	N_linked_branching	LUAD
TOTAL	32	1	0.00217377	0.0363183	0.0703149	64	0	0.00424987	93	1	21	19	0.00158742	Activated NOTCH1 Transmits Signal to the Nucleus	NOTCH1	N_linked_branching	LUAD
TOTAL	1693	5	0.115006	0.0380139	0.0703149	4802	0	0.270621	5922	5	885	20	0.0668985	RNA Polymerase II Transcription	SNAPC1;NOTCH1;YY1;NOTCH1	N_linked_branching	LUAD
TOTAL	36	1	0.00244549	0.0407698	0.0703149	23	0	0.00269616	59	1	13	4	0.00098269	RNA Polymerase III Transcription Initiation	SNAPC1	N_linked_branching	LUAD
TOTAL	36	1	0.00244549	0.0407698	0.0703149	83	0	0.00525522	115	1	22	3	0.00166301	NOTCH3 Intracellular Domain Regulates Transcription	NOTCH1	N_linked_branching	LUAD
TOTAL	40	1	0.00271721	0.0452019	0.0703149	13	0	0.00228488	50	1	5	1	0.000377958	DNA Damage Recognition in GG-NER	YY1	N_linked_branching	LUAD
TOTAL	46	1	0.00312479	0.051814	0.0703149	33	0	0.00361011	79	1	25	6	0.00188979	RNA Polymerase III Transcription	SNAPC1	N_linked_branching	LUAD
TOTAL	46	1	0.00312479	0.051814	0.0703149	10	0	0.00255906	56	1	13	3	0.00098269	RNA Polymerase III Abortive And Retractive Initiation	SNAPC1	N_linked_branching	LUAD
TOTAL	1851	5	0.125739	0.0529806	0.0703149	4993	0	0.282822	6189	5	996	26	0.0752891	Gene expression (Transcription)	SNAPC1;NOTCH1;YY1;NOTCH1	N_linked_branching	LUAD
TOTAL	52	1	0.00353237	0.0583829	0.0703149	1111	0	0.052278	1144	1	44	2	0.00332603	Transcriptional regulation by the AP-2 (TFAP2) family of transcription factors	YY1	N_linked_branching	LUAD
TOTAL	57	1	0.00387202	0.0638243	0.0703149	264	0	0.0140749	308	1	18	16	0.00136065	NOTCH1 Intracellular Domain Regulates Transcription	NOTCH1	N_linked_branching	LUAD
TOTAL	63	1	0.0042796	0.0703149	0.0703149	223	0	0.012841	281	1	37	3	0.00279689	Signaling by NOTCH3	NOTCH1	N_linked_branching	LUAD
TOTAL	67	1	0.00455132	0.0746184	0.0746184	161	0	0.0102363	224	1	26	1	0.00196538	Regulation of beta-cell development	NOTCH1	N_linked_branching	LUAD
TOTAL	68	1	0.00461925	0.0756913	0.0756913	229	0	0.0130695	286	1	21	21	0.00158742	Constitutive Signaling by NOTCH1 HD+PEST Domain Mutants	NOTCH1	N_linked_branching	LUAD
TOTAL	68	1	0.00461925	0.0756913	0.0756913	229	0	0.0130695	286	1	21	21	0.00158742	Constitutive Signaling by NOTCH1 PEST Domain Mutants	NOTCH1	N_linked_branching	LUAD
TOTAL	68	1	0.00461925	0.0756913	0.0756913	229	0	0.0130695	286	1	21	21	0.00158742	Signaling by NOTCH1 PEST Domain Mutants in Cancer	NOTCH1	N_linked_branching	LUAD
TOTAL	68	1	0.00461925	0.0756913	0.0756913	229	0	0.0130695	286	1	21	21	0.00158742	Signaling by NOTCH1 HD+PEST Domain Mutants in Cancer	NOTCH1	N_linked_branching	LUAD
TOTAL	68	1	0.00461925	0.0756913	0.0756913	229	0	0.0130695	286	1	39	39	0.00294807	Signaling by NOTCH1 in Cancer	NOTCH1	N_linked_branching	LUAD
TOTAL	78	1	0.00529855	0.0863566	0.0863566	3	0	0.00365581	80	1	9	1	0.000680324	Diseases associated with O-glycosylation of proteins	NOTCH1	N_linked_branching	LUAD
TOTAL	84	1	0.00570613	0.0927	0.0927	299	0	0.016771	367	1	39	35	0.00294807	Signaling by NOTCH1	NOTCH1	N_linked_branching	LUAD
TOTAL	1554	4	0.105563	0.0966804	0.0966804	4640	0	0.260019	5690	4	824	10	0.0622874	Generic Transcription Pathway	NOTCH1;YY1;NOTCH1	N_linked_branching	LUAD
TOTAL	155	4	0.0105292	4.19753e-05	0.000698217	1351	0	0.0678152	1484	4	94	50	0.0071056	Unfolded Protein Response (UPR)	XBP1;XBP1	Dolichol	LUAD
TOTAL	9	2	0.000611372	6.34743e-05	0.000698217	114	0	0.0055751	122	2	7	2	0.000529141	TFAP2A acts as a transcriptional repressor during retinoic acid induced cell differentiation	MYBL2;MYBL2	Dolichol	LUAD
TOTAL	15	2	0.00101895	0.000175505	0.000932435	191	0	0.00918521	201	2	5	1	0.000377958	ATF6 (ATF6-alpha) activates chaperone genes	XBP1;XBP1	Dolichol	LUAD
TOTAL	17	2	0.00115481	0.00022508	0.000932435	191	0	0.00927661	203	2	10	1	0.000755915	ATF6 (ATF6-alpha) activates chaperones	XBP1;XBP1	Dolichol	LUAD
TOTAL	101	3	0.00686095	0.000288218	0.000932435	927	0	0.0466115	1020	3	53	49	0.00400635	IRE1alpha activates chaperones	XBP1;XBP1	Dolichol	LUAD
TOTAL	20	2	0.0013586	0.000310812	0.000932435	74	0	0.00388429	85	2	8	2	0.000604732	Transcription of E2F targets under negative control by p107 (RBL1) and p130 (RBL2) in complex with HDAC1	MYBL2;MYBL2	Dolichol	LUAD
TOTAL	23	2	0.00156239	0.000410101	0.0012303	158	0	0.00790568	173	2	15	12	0.00113387	Polo-like kinase mediated events	MYBL2;FOXM1	Dolichol	LUAD
TOTAL	38	2	0.00258135	0.00110661	0.00221322	294	0	0.0142119	311	2	27	2	0.00204097	G0 and Early G1	MYBL2;MYBL2	Dolichol	LUAD
TOTAL	52	2	0.00353237	0.00205004	0.00410008	1111	0	0.052278	1144	2	44	2	0.00332603	Transcriptional regulation by the AP-2 (TFAP2) family of transcription factors	MYBL2;MYBL2	Dolichol	LUAD
TOTAL	596	4	0.0404864	0.00638742	0.0127748	1412	0	0.0831696	1820	4	350	20	0.026457	Cell Cycle, Mitotic	NCAPG;MYBL2;MYBL2;FOXM1	Dolichol	LUAD
TOTAL	734	4	0.0498607	0.0131114	0.0191836	2035	0	0.112919	2471	4	449	20	0.0339406	Cell Cycle	NCAPG;MYBL2;MYBL2;FOXM1	Dolichol	LUAD
TOTAL	15	1	0.00101895	0.0191836	0.0191836	0	0	0.000685464	15	1	4	4	0.000302366	Condensation of Prometaphase Chromosomes	NCAPG	Dolichol	LUAD
TOTAL	173	2	0.0117519	0.0206827	0.0206827	545	0	0.0299319	655	2	99	2	0.00748356	Mitotic G1 phase and G1/S transition	MYBL2;MYBL2	Dolichol	LUAD
TOTAL	212	2	0.0144012	0.0301487	0.0301487	597	0	0.0350043	766	2	78	14	0.00589614	G2/M Transition	MYBL2;FOXM1	Dolichol	LUAD
TOTAL	214	2	0.0145371	0.0306734	0.0306734	597	0	0.0350957	768	2	80	14	0.00604732	Mitotic G2-G2/M phases	MYBL2;FOXM1	Dolichol	LUAD
TOTAL	32	1	0.00217377	0.0405034	0.0405034	81	0	0.00470685	103	1	25	2	0.00188979	Cyclin A/B1/B2 associated events during G2/M transition	FOXM1	Dolichol	LUAD
TOTAL	9	1	0.000611372	0.00670457	0.0938639	0	0	0.000411278	9	1	2	1	0.000151183	Phase 3 - rapid repolarisation	ERG	Gangliosides	LUAD
TOTAL	34	1	0.00230963	0.0251145	0.0971737	237	0	0.0122926	269	1	24	3	0.0018142	RUNX2 regulates osteoblast differentiation	MAF	Gangliosides	LUAD
TOTAL	43	1	0.002921	0.0316658	0.0971737	278	0	0.014349	314	1	32	3	0.00241893	RUNX2 regulates bone development	MAF	Gangliosides	LUAD
TOTAL	44	1	0.00298893	0.0323912	0.0971737	0	0	0.00201069	44	1	1	1	7.55915e-05	Voltage gated Potassium channels	ERG	Gangliosides	LUAD
TOTAL	20	2	0.0013586	0.000586997	0.0152619	21	0	0.0018736	41	2	4	1	0.000302366	Regulation of gene expression in late stage (branching morphogenesis) pancreatic bud precursor cells	HNF1B;HNF1B	GSL_Core	LUAD
TOTAL	67	2	0.00455132	0.00626071	0.0813893	161	0	0.0102363	224	2	26	3	0.00196538	Regulation of beta-cell development	HNF1B;HNF1B	GSL_Core	LUAD
TOTAL	14	1	0.000951022	0.0244349	0.0830363	22	0	0.00164511	36	1	6	2	0.000453549	Regulation of gene expression in early pancreatic precursor cells	HNF1B	GSL_Core	LUAD
TOTAL	16	1	0.00108688	0.0278783	0.0830363	126	0	0.00626057	137	1	3	1	0.000226775	SUMOylation of DNA methylation proteins	DNMT3A	GSL_Core	LUAD
TOTAL	27	1	0.00183411	0.0466096	0.0830363	0	0	0.00123383	27	1	4	4	0.000302366	RNA Polymerase III Transcription Initiation From Type 2 Promoter	GTF3C2	GSL_Core	LUAD
TOTAL	28	1	0.00190204	0.0482951	0.0830363	0	0	0.00127953	28	1	5	4	0.000377958	RNA Polymerase III Transcription Initiation From Type 1 Promoter	GTF3C2	GSL_Core	LUAD
TOTAL	36	1	0.00244549	0.0616765	0.0830363	23	0	0.00269616	59	1	13	8	0.00098269	RNA Polymerase III Transcription Initiation	GTF3C2	GSL_Core	LUAD
TOTAL	36	1	0.00244549	0.0616765	0.0830363	27	0	0.00269616	59	1	7	2	0.000529141	DNA methylation	DNMT3A	GSL_Core	LUAD
TOTAL	44	1	0.00298893	0.0748769	0.0830363	4	0	0.00219348	48	1	4	2	0.000302366	PRC2 methylates histones and DNA	DNMT3A	GSL_Core	LUAD
TOTAL	260	2	0.0176618	0.0766765	0.0830363	497	0	0.0308459	675	2	85	3	0.00642528	Chromatin modifying enzymes	DNMT3A;SETDB1	GSL_Core	LUAD
TOTAL	260	2	0.0176618	0.0766765	0.0830363	497	0	0.0308459	675	2	85	3	0.00642528	Chromatin organization	DNMT3A;SETDB1	GSL_Core	LUAD
TOTAL	46	1	0.00312479	0.078149	0.0830363	33	0	0.00361011	79	1	25	12	0.00188979	RNA Polymerase III Transcription	GTF3C2	GSL_Core	LUAD
TOTAL	46	1	0.00312479	0.078149	0.0830363	10	0	0.00255906	56	1	13	6	0.00098269	RNA Polymerase III Abortive And Retractive Initiation	GTF3C2	GSL_Core	LUAD
TOTAL	49	1	0.00332858	0.0830363	0.0830363	91	0	0.00612347	134	1	22	2	0.00166301	PKMTs methylate histone lysines	SETDB1	GSL_Core	LUAD
TOTAL	53	1	0.0036003	0.0895139	0.0895139	318	0	0.0162683	356	1	22	1	0.00166301	RMTs methylate histone arginines	DNMT3A	GSL_Core	LUAD
TOTAL	87	2	0.00590992	0.00447791	0.0972575	257	0	0.0151716	332	2	32	16	0.00241893	Transcriptional activation of mitochondrial biogenesis	NRF1;NRF1	LacdiNAc	LUSC
TOTAL	127	2	0.00862713	0.00928727	0.0972575	391	0	0.0228488	500	2	36	16	0.00272129	Mitochondrial biogenesis	NRF1;NRF1	LacdiNAc	LUSC
TOTAL	174	2	0.0118198	0.0168884	0.0972575	400	0	0.025682	562	2	41	4	0.00309925	PPARA activates gene expression	NRF1;NFYC	LacdiNAc	LUSC
TOTAL	15	1	0.00101895	0.0171817	0.0972575	191	0	0.00918521	201	1	5	3	0.000377958	ATF6 (ATF6-alpha) activates chaperone genes	NFYC	LacdiNAc	LUSC
TOTAL	176	2	0.0119557	0.0172556	0.0972575	433	0	0.0270073	591	2	44	4	0.00332603	Regulation of lipid metabolism by PPARalpha	NRF1;NFYC	LacdiNAc	LUSC
TOTAL	17	1	0.00115481	0.0194515	0.0972575	191	0	0.00927661	203	1	10	3	0.000755915	ATF6 (ATF6-alpha) activates chaperones	NFYC	LacdiNAc	LUSC
TOTAL	48	1	0.00326065	0.0540084	0.0948052	93	0	0.00589499	129	1	4	2	0.000302366	ERCC6 (CSB) and EHMT2 (G9a) positively regulate rRNA expression	ERCC6	HS_Extend	LUSC
TOTAL	50	1	0.00339651	0.056198	0.0948052	221	0	0.0116529	255	1	6	1	0.000453549	RNA Polymerase I Transcription Initiation	ERCC6	HS_Extend	LUSC
TOTAL	56	1	0.00380409	0.0627384	0.0948052	78	0	0.00598638	131	1	7	5	0.000529141	Formation of TC-NER Pre-Incision Complex	ERCC6	HS_Extend	LUSC
TOTAL	62	1	0.00421167	0.0692361	0.0948052	201	0	0.0116986	256	1	3	3	0.000226775	B-WICH complex positively regulates rRNA expression	ERCC6	HS_Extend	LUSC
TOTAL	66	1	0.00448339	0.0735443	0.0948052	0	0	0.00301604	66	1	2	2	0.000151183	Gap-filling DNA repair synthesis and ligation in TC-NER	ERCC6	HS_Extend	LUSC
TOTAL	68	1	0.00461925	0.0756913	0.0948052	23	0	0.00392999	86	1	7	7	0.000529141	Dual incision in TC-NER	ERCC6	HS_Extend	LUSC
TOTAL	80	1	0.00543441	0.0884756	0.0948052	289	0	0.0160855	352	1	7	5	0.000529141	Positive epigenetic regulation of rRNA expression	ERCC6	HS_Extend	LUSC
TOTAL	85	1	0.00577406	0.0937532	0.0948052	85	0	0.0074487	163	1	17	15	0.00128506	Transcription-Coupled Nucleotide Excision Repair (TC-NER)	ERCC6	HS_Extend	LUSC
TOTAL	86	1	0.00584199	0.0948052	0.0948052	31	0	0.00507243	111	1	2	2	0.000151183	Nuclear Receptor transcription pathway	NR2C2	HS_Extend	LUSC
TOTAL	87	1	0.00590992	0.0958561	0.0958561	224	0	0.0134808	295	1	10	1	0.000755915	RNA Polymerase I Promoter Clearance	ERCC6	HS_Extend	LUSC
TOTAL	89	1	0.00604578	0.0979545	0.0979545	245	0	0.0144861	317	1	14	1	0.00105828	RNA Polymerase I Transcription	ERCC6	HS_Extend	LUSC
TOTAL	39	1	0.00264928	0.0440957	0.0979545	0	0	0.00178221	39	1	2	2	0.000151183	Pausing and recovery of Tat-mediated HIV elongation	SSRP1	Complex_Nlinked	LUSC
TOTAL	39	1	0.00264928	0.0440957	0.0979545	0	0	0.00178221	39	1	3	3	0.000226775	Tat-mediated HIV elongation arrest and recovery	SSRP1	Complex_Nlinked	LUSC
TOTAL	40	1	0.00271721	0.0452019	0.0979545	0	0	0.0018279	40	1	2	2	0.000151183	Pausing and recovery of HIV elongation	SSRP1	Complex_Nlinked	LUSC
TOTAL	40	1	0.00271721	0.0452019	0.0979545	0	0	0.0018279	40	1	3	3	0.000226775	HIV elongation arrest and recovery	SSRP1	Complex_Nlinked	LUSC
TOTAL	49	1	0.00332858	0.0551038	0.0979545	33	0	0.00361011	79	1	5	1	0.000377958	Formation of HIV-1 elongation complex containing HIV-1 Tat	SSRP1	Complex_Nlinked	LUSC
TOTAL	50	1	0.00339651	0.056198	0.0979545	9	0	0.00265046	58	1	2	1	0.000151183	Formation of HIV elongation complex in the absence of HIV Tat	SSRP1	Complex_Nlinked	LUSC
TOTAL	52	1	0.00353237	0.0583829	0.0979545	33	0	0.0037472	82	1	8	4	0.000604732	Tat-mediated elongation of the HIV-1 transcript	SSRP1	Complex_Nlinked	LUSC
TOTAL	52	1	0.00353237	0.0583829	0.0979545	38	0	0.00388429	85	1	15	4	0.00113387	HIV Transcription Elongation	SSRP1	Complex_Nlinked	LUSC
TOTAL	63	1	0.0042796	0.0703149	0.0979545	96	0	0.00662615	145	1	2	1	0.000151183	Formation of RNA Pol II elongation complex	SSRP1	Complex_Nlinked	LUSC
TOTAL	66	1	0.00448339	0.0735443	0.0979545	101	0	0.00690033	151	1	8	4	0.000604732	RNA Polymerase II Transcription Elongation	SSRP1	Complex_Nlinked	LUSC
TOTAL	81	1	0.00550234	0.0895335	0.0979545	109	0	0.00822556	180	1	47	15	0.0035528	Transcription of the HIV genome	SSRP1	Complex_Nlinked	LUSC
TOTAL	86	1	0.00584199	0.0948052	0.0979545	31	0	0.00507243	111	1	2	2	0.000151183	Nuclear Receptor transcription pathway	NR2F1	Complex_Nlinked	LUSC
TOTAL	88	1	0.00597785	0.0969059	0.0979545	249	0	0.0139378	305	1	17	7	0.00128506	RNA Polymerase II Pre-transcription Events	SSRP1	Complex_Nlinked	LUSC
TOTAL	89	1	0.00604578	0.0979545	0.0979545	120	0	0.00918521	201	1	17	3	0.00128506	TP53 Regulates Transcription of DNA Repair Genes	SSRP1	Complex_Nlinked	LUSC
TOTAL	15	1	0.00101895	0.0071109	0.0714165	191	0	0.00918521	201	1	5	3	0.000377958	ATF6 (ATF6-alpha) activates chaperone genes	NFYC	sulfated_glycans	MESO
TOTAL	17	1	0.00115481	0.00805574	0.0714165	191	0	0.00927661	203	1	10	3	0.000755915	ATF6 (ATF6-alpha) activates chaperones	NFYC	sulfated_glycans	MESO
TOTAL	23	1	0.00156239	0.0108856	0.0714165	175	0	0.00891103	195	1	15	3	0.00113387	FOXO-mediated transcription of cell death genes	NFYC	sulfated_glycans	MESO
TOTAL	32	1	0.00217377	0.0151175	0.0714165	103	0	0.00603208	132	1	14	2	0.00105828	Myogenesis	MEF2D	sulfated_glycans	MESO
TOTAL	34	1	0.00230963	0.0160558	0.0714165	99	0	0.00584929	128	1	7	1	0.000529141	ATF4 activates genes in response to endoplasmic reticulum stress	NFYC	sulfated_glycans	MESO
TOTAL	42	1	0.00285307	0.0198013	0.0714165	101	0	0.00621487	136	1	11	1	0.000831507	PERK regulates gene expression	NFYC	sulfated_glycans	MESO
TOTAL	56	1	0.00380409	0.0263267	0.0714165	327	0	0.0170452	373	1	37	2	0.00279689	NGF-stimulated transcription	MEF2D	sulfated_glycans	MESO
TOTAL	70	1	0.00475511	0.0328147	0.0714165	128	0	0.00881963	193	1	42	30	0.00317484	Activation of gene expression by SREBF (SREBP)	NFYC	sulfated_glycans	MESO
TOTAL	80	1	0.00543441	0.0374263	0.0714165	350	0	0.0191016	418	1	48	2	0.00362839	Nuclear Events (kinase and transcription factor activation)	MEF2D	sulfated_glycans	MESO
TOTAL	86	1	0.00584199	0.0401842	0.0714165	162	0	0.0110588	242	1	52	30	0.00393076	Regulation of cholesterol biosynthesis by SREBP (SREBF)	NFYC	sulfated_glycans	MESO
TOTAL	87	1	0.00590992	0.0406432	0.0714165	257	0	0.0151716	332	1	32	1	0.00241893	Transcriptional activation of mitochondrial biogenesis	MEF2D	sulfated_glycans	MESO
TOTAL	104	1	0.00706474	0.0484173	0.0714165	502	0	0.026596	582	1	59	1	0.0044599	Circadian Clock	MEF2D	sulfated_glycans	MESO
TOTAL	110	1	0.00747232	0.0511482	0.0714165	633	0	0.0329936	722	1	85	3	0.00642528	FOXO-mediated transcription	NFYC	sulfated_glycans	MESO
TOTAL	127	1	0.00862713	0.0588492	0.0714165	391	0	0.0228488	500	1	36	1	0.00272129	Mitochondrial biogenesis	MEF2D	sulfated_glycans	MESO
TOTAL	143	1	0.00971401	0.0660483	0.0714165	696	0	0.0369236	808	1	102	2	0.00771033	Signaling by NTRK1 (TRKA)	MEF2D	sulfated_glycans	MESO
TOTAL	155	1	0.0105292	0.0714165	0.0714165	1351	0	0.0678152	1484	1	94	3	0.0071056	Unfolded Protein Response (UPR)	NFYC	sulfated_glycans	MESO
TOTAL	166	1	0.0112764	0.0763142	0.0763142	925	0	0.0479825	1050	1	164	2	0.012397	Signaling by NTRKs	MEF2D	sulfated_glycans	MESO
TOTAL	174	1	0.0118198	0.0798622	0.0798622	400	0	0.025682	562	1	41	3	0.00309925	PPARA activates gene expression	NFYC	sulfated_glycans	MESO
TOTAL	176	1	0.0119557	0.0807474	0.0807474	433	0	0.0270073	591	1	44	3	0.00332603	Regulation of lipid metabolism by PPARalpha	NFYC	sulfated_glycans	MESO
TOTAL	4	2	0.000271721	4.05415e-06	0.00016622	0	0	0.00018279	4	2	2	2	0.000151183	RUNX3 regulates RUNX1-mediated transcription	RUNX1	CS_DS_Extend	MESO
TOTAL	118	3	0.00801576	8.09837e-05	0.00161967	415	0	0.0231687	507	3	47	4	0.0035528	Transcriptional regulation by RUNX3	RUNX1;RUNX1	CS_DS_Extend	MESO
TOTAL	32	2	0.00217377	0.000256521	0.00333478	148	0	0.00799708	175	2	19	18	0.00143624	Regulation of RUNX1 Expression and Activity	RUNX1;RUNX1	CS_DS_Extend	MESO
TOTAL	6	1	0.000407581	0.00447427	0.0245667	18	0	0.00105104	23	1	2	1	0.000151183	RUNX2 regulates genes involved in differentiation of myeloid cells	RUNX1	CS_DS_Extend	MESO
TOTAL	7	1	0.000475511	0.0052182	0.0245667	5	0	0.000548371	12	1	5	5	0.000377958	RUNX1 regulates transcription of genes involved in interleukin signaling	RUNX1	CS_DS_Extend	MESO
TOTAL	7	1	0.000475511	0.0052182	0.0245667	74	0	0.00365581	80	1	4	4	0.000302366	RUNX1 regulates transcription of genes involved in BCR signaling	RUNX1	CS_DS_Extend	MESO
TOTAL	8	1	0.000543441	0.00596164	0.0245667	52	0	0.00274185	60	1	6	6	0.000453549	RUNX1 regulates expression of components of tight junctions	RUNX1	CS_DS_Extend	MESO
TOTAL	9	1	0.000611372	0.00670457	0.0245667	64	0	0.00329023	72	1	4	4	0.000302366	RUNX1 regulates transcription of genes involved in WNT signaling	RUNX1	CS_DS_Extend	MESO
TOTAL	9	1	0.000611372	0.00670457	0.0245667	0	0	0.000411278	9	1	2	1	0.000151183	Phase 3 - rapid repolarisation	ERG	CS_DS_Extend	MESO
TOTAL	10	1	0.000679302	0.00744699	0.0245667	96	0	0.00475255	104	1	8	7	0.000604732	RUNX1 regulates estrogen receptor mediated transcription	RUNX1	CS_DS_Extend	MESO
TOTAL	11	1	0.000747232	0.00818891	0.0245667	57	0	0.00306174	67	1	7	7	0.000529141	RUNX1 regulates transcription of genes involved in differentiation of myeloid cells	RUNX1	CS_DS_Extend	MESO
TOTAL	11	1	0.000747232	0.00818891	0.0245667	32	0	0.001965	43	1	8	6	0.000604732	RUNX1 regulates transcription of genes involved in differentiation of keratinocytes	RUNX1	CS_DS_Extend	MESO
TOTAL	16	1	0.00108688	0.0118909	0.0252597	99	0	0.00516383	113	1	8	2	0.000604732	RUNX3 regulates p14-ARF	RUNX1	CS_DS_Extend	MESO
TOTAL	17	1	0.00115481	0.0126298	0.0252597	39	0	0.00246767	54	1	20	20	0.00151183	RUNX1 and FOXP3 control the development of regulatory T lymphocytes (Tregs)	RUNX1	CS_DS_Extend	MESO
TOTAL	261	2	0.0177298	0.0155444	0.0310889	860	0	0.0492163	1077	2	132	123	0.00997808	Transcriptional regulation by RUNX1	RUNX1;RUNX1	CS_DS_Extend	MESO
TOTAL	39	1	0.00264928	0.0287591	0.0567643	59	0	0.00429557	94	1	5	5	0.000377958	RUNX1 interacts with co-factors whose precise effect on RUNX1 targets is not known	RUNX1	CS_DS_Extend	MESO
TOTAL	39	1	0.00264928	0.0287591	0.0567643	11	0	0.00228488	50	1	9	1	0.000680324	Organic cation transport	RUNX1	CS_DS_Extend	MESO
TOTAL	44	1	0.00298893	0.0323912	0.0567643	0	0	0.00201069	44	1	1	1	7.55915e-05	Voltage gated Potassium channels	ERG	CS_DS_Extend	MESO
TOTAL	51	1	0.00346444	0.0374555	0.0567643	12	0	0.00287895	63	1	12	1	0.000907098	Organic cation/anion/zwitterion transport	RUNX1	CS_DS_Extend	MESO
TOTAL	71	1	0.00482304	0.0517924	0.0567643	368	0	0.0195129	427	1	27	3	0.00204097	Transcriptional regulation of granulopoiesis	RUNX1	CS_DS_Extend	MESO
TOTAL	78	1	0.00529855	0.0567643	0.0567643	318	0	0.017685	387	1	33	33	0.00249452	RUNX1 regulates genes involved in megakaryocyte differentiation and platelet function	RUNX1	CS_DS_Extend	MESO
TOTAL	89	1	0.00604578	0.0645293	0.0645293	158	0	0.0110588	242	1	28	2	0.00211656	Pre-NOTCH Transcription and Translation	RUNX1	CS_DS_Extend	MESO
TOTAL	106	1	0.0072006	0.0764156	0.0764156	132	0	0.0106932	234	1	15	10	0.00113387	RUNX1 regulates transcription of genes involved in differentiation of HSCs	RUNX1	CS_DS_Extend	MESO
TOTAL	107	1	0.00726853	0.0771105	0.0771105	22	0	0.00584929	128	1	19	1	0.00143624	Potassium Channels	ERG	CS_DS_Extend	MESO
TOTAL	113	1	0.00767611	0.0812699	0.0812699	197	0	0.0139378	305	1	38	2	0.00287248	Pre-NOTCH Expression and Processing	RUNX1	CS_DS_Extend	MESO
TOTAL	20	2	0.0013586	1.10548e-05	0.000154767	74	0	0.00388429	85	2	8	2	0.000604732	Transcription of E2F targets under negative control by p107 (RBL1) and p130 (RBL2) in complex with HDAC1	MYBL2;MYBL2	Gangliosides	MESO
TOTAL	38	2	0.00258135	3.98426e-05	0.000358584	294	0	0.0142119	311	2	27	2	0.00204097	G0 and Early G1	MYBL2;MYBL2	Gangliosides	MESO
TOTAL	52	2	0.00353237	7.45136e-05	0.000521595	1111	0	0.052278	1144	2	44	2	0.00332603	Transcriptional regulation by the AP-2 (TFAP2) family of transcription factors	MYBL2;MYBL2	Gangliosides	MESO
TOTAL	173	2	0.0117519	0.000815719	0.00407859	545	0	0.0299319	655	2	99	2	0.00748356	Mitotic G1 phase and G1/S transition	MYBL2;MYBL2	Gangliosides	MESO
TOTAL	15	1	0.00101895	0.00406958	0.0113635	191	0	0.00918521	201	1	5	3	0.000377958	ATF6 (ATF6-alpha) activates chaperone genes	NFYC	Gangliosides	MESO
TOTAL	1554	3	0.105563	0.00433291	0.0113635	4640	0	0.260019	5690	3	824	5	0.0622874	Generic Transcription Pathway	MYBL2;NFYC;MYBL2	Gangliosides	MESO
TOTAL	17	1	0.00115481	0.00461126	0.0113635	191	0	0.00927661	203	1	10	3	0.000755915	ATF6 (ATF6-alpha) activates chaperones	NFYC	Gangliosides	MESO
TOTAL	1693	3	0.115006	0.00555961	0.0113635	4802	0	0.270621	5922	3	885	5	0.0668985	RNA Polymerase II Transcription	MYBL2;NFYC;MYBL2	Gangliosides	MESO
TOTAL	23	1	0.00156239	0.00623494	0.0113635	158	0	0.00790568	173	1	15	6	0.00113387	Polo-like kinase mediated events	MYBL2	Gangliosides	MESO
TOTAL	23	1	0.00156239	0.00623494	0.0113635	175	0	0.00891103	195	1	15	3	0.00113387	FOXO-mediated transcription of cell death genes	NFYC	Gangliosides	MESO
TOTAL	1851	3	0.125739	0.00720194	0.0113635	4993	0	0.282822	6189	3	996	5	0.0752891	Gene expression (Transcription)	MYBL2;NFYC;MYBL2	Gangliosides	MESO
TOTAL	34	1	0.00230963	0.00920655	0.0113635	99	0	0.00584929	128	1	7	1	0.000529141	ATF4 activates genes in response to endoplasmic reticulum stress	NFYC	Gangliosides	MESO
TOTAL	596	2	0.0404864	0.00931204	0.0113635	1412	0	0.0831696	1820	2	350	8	0.026457	Cell Cycle, Mitotic	MYBL2;MYBL2	Gangliosides	MESO
TOTAL	42	1	0.00285307	0.0113635	0.0113635	101	0	0.00621487	136	1	11	1	0.000831507	PERK regulates gene expression	NFYC	Gangliosides	MESO
TOTAL	734	2	0.0498607	0.0139434	0.0139434	2035	0	0.112919	2471	2	449	8	0.0339406	Cell Cycle	MYBL2;MYBL2	Gangliosides	MESO
TOTAL	70	1	0.00475511	0.0188852	0.0188852	128	0	0.00881963	193	1	42	30	0.00317484	Activation of gene expression by SREBF (SREBP)	NFYC	Gangliosides	MESO
TOTAL	86	1	0.00584199	0.023164	0.023164	162	0	0.0110588	242	1	52	30	0.00393076	Regulation of cholesterol biosynthesis by SREBP (SREBF)	NFYC	Gangliosides	MESO
TOTAL	110	1	0.00747232	0.0295559	0.0295559	633	0	0.0329936	722	1	85	3	0.00642528	FOXO-mediated transcription	NFYC	Gangliosides	MESO
TOTAL	155	1	0.0105292	0.0414562	0.0414562	1351	0	0.0678152	1484	1	94	3	0.0071056	Unfolded Protein Response (UPR)	NFYC	Gangliosides	MESO
TOTAL	174	1	0.0118198	0.0464477	0.0464477	400	0	0.025682	562	1	41	3	0.00309925	PPARA activates gene expression	NFYC	Gangliosides	MESO
TOTAL	176	1	0.0119557	0.046972	0.046972	433	0	0.0270073	591	1	44	3	0.00332603	Regulation of lipid metabolism by PPARalpha	NFYC	Gangliosides	MESO
TOTAL	212	1	0.0144012	0.0563723	0.0563723	597	0	0.0350043	766	1	78	6	0.00589614	G2/M Transition	MYBL2	Gangliosides	MESO
TOTAL	214	1	0.0145371	0.0568925	0.0568925	597	0	0.0350957	768	1	80	6	0.00604732	Mitotic G2-G2/M phases	MYBL2	Gangliosides	MESO
TOTAL	323	1	0.0219414	0.0849192	0.0849192	745	0	0.047754	1045	1	237	30	0.0179152	Metabolism of steroids	NFYC	Gangliosides	MESO
TOTAL	5	1	0.000339651	0.00811986	0.0876261	3	0	0.000365581	8	1	2	2	0.000151183	TFAP2 (AP-2) family regulates transcription of other transcription factors	TFAP2C	Blood_Groups	OV
TOTAL	86	2	0.00584199	0.00864848	0.0876261	31	0	0.00507243	111	2	2	2	0.000151183	Nuclear Receptor transcription pathway	ESRRA;AR	Blood_Groups	OV
TOTAL	87	2	0.00590992	0.00884202	0.0876261	257	0	0.0151716	332	2	32	5	0.00241893	Transcriptional activation of mitochondrial biogenesis	ESRRA;ESRRA	Blood_Groups	OV
TOTAL	6	1	0.000407581	0.00973623	0.0876261	192	0	0.00904812	198	1	4	3	0.000302366	TFAP2 (AP-2) family regulates transcription of cell cycle factors	TFAP2C	Blood_Groups	OV
TOTAL	11	1	0.000747232	0.0177803	0.0951654	131	0	0.00621487	136	1	6	4	0.000453549	Negative regulation of activity of TFAP2 (AP-2) family transcription factors	TFAP2C	Blood_Groups	OV
TOTAL	127	2	0.00862713	0.0181115	0.0951654	391	0	0.0228488	500	2	36	5	0.00272129	Mitochondrial biogenesis	ESRRA;ESRRA	Blood_Groups	OV
TOTAL	12	1	0.000815162	0.0193816	0.0951654	100	0	0.00502673	110	1	4	3	0.000302366	Activation of the TFAP2 (AP-2) family of transcription factors	TFAP2C	Blood_Groups	OV
TOTAL	147	2	0.00998573	0.0237913	0.0951654	567	0	0.0314856	689	2	84	5	0.00634969	Transcriptional regulation by RUNX2	ESRRA;AR	Blood_Groups	OV
TOTAL	39	3	0.00264928	9.55857e-05	0.00372784	400	0	0.0196043	429	3	17	2	0.00128506	SMAD2/SMAD3:SMAD4 heterotrimer regulates transcription	JUNB;JUNB;CDK9	GPI_Anchor	PAAD
TOTAL	55	3	0.00373616	0.000261632	0.00497101	574	0	0.0277841	608	3	38	2	0.00287248	Transcriptional activity of SMAD2/SMAD3:SMAD4 heterotrimer	JUNB;JUNB;CDK9	GPI_Anchor	PAAD
TOTAL	85	3	0.00577406	0.000922603	0.0138391	834	0	0.0405794	888	3	82	2	0.0061985	Signaling by TGF-beta Receptor Complex	JUNB;JUNB;CDK9	GPI_Anchor	PAAD
TOTAL	114	3	0.00774404	0.00212971	0.0276862	906	0	0.044875	982	3	107	2	0.00808829	Signaling by TGFB family members	JUNB;JUNB;CDK9	GPI_Anchor	PAAD
TOTAL	3	1	0.000203791	0.0067032	0.0603288	54	0	0.00246767	54	1	2	2	0.000151183	Interactions of Tat with host cellular proteins	CDK9	GPI_Anchor	PAAD
TOTAL	3	1	0.000203791	0.0067032	0.0603288	0	0	0.000137093	3	1	1	1	7.55915e-05	Signaling by TCF7L2 mutants	CTBP2	GPI_Anchor	PAAD
TOTAL	16	2	0.00108688	0.000988095	0.0177857	11	0	0.00114244	25	2	7	4	0.000529141	RUNX3 regulates NOTCH signaling	HES1;HES1	Terminal_Fucose	PAAD
TOTAL	16	2	0.00108688	0.000988095	0.0177857	76	0	0.00406708	89	2	9	2	0.000680324	NOTCH2 intracellular domain regulates transcription	HES1;HES1	Terminal_Fucose	PAAD
TOTAL	20	2	0.0013586	0.00153279	0.021459	21	0	0.0018736	41	2	4	2	0.000302366	Regulation of gene expression in late stage (branching morphogenesis) pancreatic bud precursor cells	HES1;HES1	Terminal_Fucose	PAAD
TOTAL	26	2	0.00176618	0.00256252	0.0307503	109	0	0.00594068	130	2	9	1	0.000680324	NOTCH4 Intracellular Domain Regulates Transcription	HES1;HES1	Terminal_Fucose	PAAD
TOTAL	36	2	0.00244549	0.00482505	0.0482107	83	0	0.00525522	115	2	22	3	0.00166301	NOTCH3 Intracellular Domain Regulates Transcription	HES1;HES1	Terminal_Fucose	PAAD
TOTAL	38	2	0.00258135	0.00535675	0.0482107	81	0	0.00530092	116	2	20	2	0.00151183	Signaling by NOTCH2	HES1;HES1	Terminal_Fucose	PAAD
TOTAL	1263	9	0.0857958	0.00826433	0.0650181	3128	0	0.184755	4043	9	556	5	0.0420289	Developmental Biology	HNF4G;HES1;HNF4A;HES1;HNF4A;HNF4G;GATA6	Terminal_Fucose	PAAD
TOTAL	57	2	0.00387202	0.0116483	0.0650181	264	0	0.0140749	308	2	18	3	0.00136065	NOTCH1 Intracellular Domain Regulates Transcription	HES1;HES1	Terminal_Fucose	PAAD
TOTAL	63	2	0.0042796	0.0140775	0.0650181	223	0	0.012841	281	2	37	3	0.00279689	Signaling by NOTCH3	HES1;HES1	Terminal_Fucose	PAAD
TOTAL	68	2	0.00461925	0.0162545	0.0650181	229	0	0.0130695	286	2	21	2	0.00158742	Constitutive Signaling by NOTCH1 HD+PEST Domain Mutants	HES1;HES1	Terminal_Fucose	PAAD
TOTAL	68	2	0.00461925	0.0162545	0.0650181	229	0	0.0130695	286	2	21	2	0.00158742	Signaling by NOTCH1 PEST Domain Mutants in Cancer	HES1;HES1	Terminal_Fucose	PAAD
TOTAL	68	2	0.00461925	0.0162545	0.0650181	229	0	0.0130695	286	2	21	2	0.00158742	Signaling by NOTCH1 HD+PEST Domain Mutants in Cancer	HES1;HES1	Terminal_Fucose	PAAD
TOTAL	68	2	0.00461925	0.0162545	0.0650181	229	0	0.0130695	286	2	21	2	0.00158742	Constitutive Signaling by NOTCH1 PEST Domain Mutants	HES1;HES1	Terminal_Fucose	PAAD
TOTAL	68	2	0.00461925	0.0162545	0.0650181	229	0	0.0130695	286	2	39	2	0.00294807	Signaling by NOTCH1 in Cancer	HES1;HES1	Terminal_Fucose	PAAD
TOTAL	84	2	0.00570613	0.0241046	0.0844108	299	0	0.016771	367	2	39	3	0.00294807	Signaling by NOTCH1	HES1;HES1	Terminal_Fucose	PAAD
TOTAL	86	2	0.00584199	0.0251762	0.0844108	31	0	0.00507243	111	2	2	2	0.000151183	Nuclear Receptor transcription pathway	HNF4G;HNF4A	Terminal_Fucose	PAAD
TOTAL	10	1	0.000679302	0.0281369	0.0844108	14	0	0.00100535	22	1	7	1	0.000529141	POU5F1 (OCT4), SOX2, NANOG repress genes related to differentiation	GATA6	Terminal_Fucose	PAAD
TOTAL	92	2	0.00624958	0.0285052	0.0855157	202	0	0.0130238	285	2	20	1	0.00151183	Signaling by NOTCH4	HES1;HES1	Terminal_Fucose	PAAD
TOTAL	11	1	0.000747232	0.0309077	0.0927232	265	0	0.0122469	268	1	5	1	0.000377958	SUMOylation of immune response proteins	PIAS4	Terminal_Fucose	PAAD
TOTAL	1263	11	0.0857958	0.00119988	0.0371964	3128	0	0.184755	4043	11	556	26	0.0420289	Developmental Biology	HNF4G;PAX6;SOX9;HNF4A;HNF4A;SMAD3;HNF4G;KAT2B;SOX9	LacdiNAc	PAAD
TOTAL	21	2	0.00142653	0.00193408	0.0423967	40	0	0.00274185	60	2	18	14	0.00136065	Transcriptional regulation of testis differentiation	SOX9;SOX9	LacdiNAc	PAAD
TOTAL	86	3	0.00584199	0.00235537	0.0423967	31	0	0.00507243	111	3	2	2	0.000151183	Nuclear Receptor transcription pathway	HNF4G;HNF4A;RXRG	LacdiNAc	PAAD
TOTAL	26	2	0.00176618	0.00293612	0.0440418	109	0	0.00594068	130	2	9	2	0.000680324	NOTCH4 Intracellular Domain Regulates Transcription	SMAD3;KAT2B	LacdiNAc	PAAD
TOTAL	3	1	0.000203791	0.00912958	0.0912958	0	0	0.000137093	3	1	1	1	7.55915e-05	SMAD4 MH2 Domain Mutants in Cancer	SMAD3	LacdiNAc	PAAD
TOTAL	3	1	0.000203791	0.00912958	0.0912958	0	0	0.000137093	3	1	1	1	7.55915e-05	Loss of Function of SMAD4 in Cancer	SMAD3	LacdiNAc	PAAD
TOTAL	3	1	0.000203791	0.00912958	0.0912958	35	0	0.00159942	35	1	1	1	7.55915e-05	SMAD2/3 MH2 Domain Mutants in Cancer	SMAD3	LacdiNAc	PAAD
TOTAL	1263	4	0.0857958	0.0206018	0.0412037	3128	0	0.184755	4043	4	556	1	0.0420289	Developmental Biology	HNF4A;HNF4A	Blood_Groups	PAAD
TOTAL	86	1	0.00584199	0.0733401	0.0733401	31	0	0.00507243	111	1	2	2	0.000151183	Nuclear Receptor transcription pathway	HNF4A	Blood_Groups	PAAD
TOTAL	4	2	0.000271721	6.9316e-05	0.00499075	208	0	0.00964219	211	2	5	4	0.000377958	Regulation of TP53 Expression	PRDM1;PRDM1	SA_paths	PAAD
TOTAL	17	2	0.00115481	0.0012215	0.043974	39	0	0.00246767	54	2	20	13	0.00151183	RUNX1 and FOXP3 control the development of regulatory T lymphocytes (Tregs)	FOXP3;FOXP3	SA_paths	PAAD
TOTAL	216	4	0.0146729	0.00394224	0.0946137	153	0	0.016314	357	4	47	2	0.0035528	Interleukin-4 and Interleukin-13 signaling	IRF4;IRF4;FOXO1;FOXO1	SA_paths	PAAD
TOTAL	35	4	0.00237756	1.70159e-05	0.00238223	138	0	0.00776859	170	4	12	1	0.000907098	Regulation of gene expression in beta cells	HNF4A;HNF4A	Type_1_2_LacNAc	PAAD
TOTAL	67	4	0.00455132	0.000206303	0.0144412	161	0	0.0102363	224	4	26	1	0.00196538	Regulation of beta-cell development	HNF4A;HNF4A	Type_1_2_LacNAc	PAAD
TOTAL	108	3	0.00733646	0.00125088	0.0475335	446	0	0.024174	529	3	18	8	0.00136065	Transcriptional regulation of white adipocyte differentiation	NCOR2;CEBPB;CEBPB	O_fucose	PAAD
TOTAL	2	2	0.00013586	1.09498e-05	0.000208045	0	0	9.13951e-05	2	2	1	1	7.55915e-05	Loss of MECP2 binding ability to 5hmC-DNA	MECP2	HS_Extend	PAAD
TOTAL	5	2	0.000339651	6.813e-05	0.00102195	0	0	0.000228488	5	2	2	2	0.000151183	Loss of MECP2 binding ability to 5mC-DNA	MECP2	HS_Extend	PAAD
TOTAL	6	2	0.000407581	9.79608e-05	0.00127349	45	0	0.00233058	51	2	4	4	0.000302366	MECP2 regulates transcription of genes involved in GABA signaling	MECP2	HS_Extend	PAAD
TOTAL	7	2	0.000475511	0.000133137	0.0014645	0	0	0.000319883	7	2	1	1	7.55915e-05	Loss of phosphorylation of MECP2 at T308	MECP2	HS_Extend	PAAD
TOTAL	8	2	0.000543441	0.000173633	0.0015627	0	0	0.000365581	8	2	1	1	7.55915e-05	Loss of MECP2 binding ability to the NCoR/SMRT complex	MECP2	HS_Extend	PAAD
TOTAL	10	2	0.000679302	0.000270493	0.00216395	47	0	0.00251337	55	2	8	8	0.000604732	MECP2 regulates transcription factors	MECP2	HS_Extend	PAAD
TOTAL	13	2	0.000883092	0.000455092	0.00318564	12	0	0.00114244	25	2	8	8	0.000604732	MECP2 regulates transcription of neuronal ligands	MECP2	HS_Extend	PAAD
TOTAL	16	2	0.00108688	0.000686292	0.00343146	0	0	0.000731161	16	2	5	5	0.000377958	Loss of function of MECP2 in Rett syndrome	MECP2	HS_Extend	PAAD
TOTAL	16	2	0.00108688	0.000686292	0.00343146	0	0	0.000731161	16	2	5	5	0.000377958	Pervasive developmental disorders	MECP2	HS_Extend	PAAD
TOTAL	16	2	0.00108688	0.000686292	0.00343146	0	0	0.000731161	16	2	5	5	0.000377958	Disorders of Developmental Biology	MECP2	HS_Extend	PAAD
TOTAL	16	2	0.00108688	0.000686292	0.00343146	0	0	0.000731161	16	2	5	5	0.000377958	Disorders of Nervous System Development	MECP2	HS_Extend	PAAD
TOTAL	89	3	0.00604578	0.00125144	0.0062572	158	0	0.0110588	242	3	28	12	0.00211656	Pre-NOTCH Transcription and Translation	NOTCH1;NOTCH1	HS_Extend	PAAD
TOTAL	113	3	0.00767611	0.00246366	0.00985464	197	0	0.0139378	305	3	38	22	0.00287248	Pre-NOTCH Expression and Processing	NOTCH1;NOTCH1	HS_Extend	PAAD
TOTAL	1554	9	0.105563	0.00893455	0.0357382	4640	0	0.260019	5690	9	824	149	0.0622874	Generic Transcription Pathway	MECP2;FOXO1;NOTCH1;MECP2;TEAD1;NOTCH1	HS_Extend	PAAD
TOTAL	67	2	0.00455132	0.011156	0.0425008	161	0	0.0102363	224	2	26	4	0.00196538	Regulation of beta-cell development	FOXO1;NOTCH1	HS_Extend	PAAD
TOTAL	6	1	0.000407581	0.0141669	0.0425008	0	0	0.000274185	6	1	1	1	7.55915e-05	Defective LFNG causes SCDO3	NOTCH1	HS_Extend	PAAD
TOTAL	6	1	0.000407581	0.0141669	0.0425008	25	0	0.00141662	31	1	1	1	7.55915e-05	FBXW7 Mutants and NOTCH1 in Cancer	NOTCH1	HS_Extend	PAAD
TOTAL	6	1	0.000407581	0.0141669	0.0425008	25	0	0.00141662	31	1	1	1	7.55915e-05	Loss of Function of FBXW7 in Cancer and NOTCH1 Signaling	NOTCH1	HS_Extend	PAAD
TOTAL	6	1	0.000407581	0.0141669	0.0425008	11	0	0.000731161	16	1	2	2	0.000151183	AKT-mediated inactivation of FOXO1A	FOXO1	HS_Extend	PAAD
TOTAL	1693	9	0.115006	0.0152547	0.045764	4802	0	0.270621	5922	9	885	149	0.0668985	RNA Polymerase II Transcription	MECP2;FOXO1;NOTCH1;MECP2;TEAD1;NOTCH1	HS_Extend	PAAD
TOTAL	8	1	0.000543441	0.0188458	0.0464219	29	0	0.00159942	35	1	5	5	0.000377958	Constitutive Signaling by NOTCH1 t(7;9)(NOTCH1:M1580_K2555) Translocation Mutant	NOTCH1	HS_Extend	PAAD
TOTAL	8	1	0.000543441	0.0188458	0.0464219	29	0	0.00159942	35	1	5	5	0.000377958	Signaling by NOTCH1 t(7;9)(NOTCH1:M1580_K2555) Translocation Mutant	NOTCH1	HS_Extend	PAAD
TOTAL	9	1	0.000611372	0.0211771	0.0464219	11	0	0.000913951	20	1	3	3	0.000226775	RUNX3 regulates YAP1-mediated transcription	TEAD1	HS_Extend	PAAD
TOTAL	258	3	0.017526	0.023211	0.0464219	753	0	0.0441896	967	3	154	61	0.0116411	Signaling by NOTCH	NOTCH1;NOTCH1	HS_Extend	PAAD
TOTAL	10	1	0.000679302	0.023503	0.0470061	7	0	0.000776859	17	1	2	2	0.000151183	Pre-NOTCH Processing in the Endoplasmic Reticulum	NOTCH1	HS_Extend	PAAD
TOTAL	1851	9	0.125739	0.0260047	0.0520094	4993	0	0.282822	6189	9	996	149	0.0752891	Gene expression (Transcription)	MECP2;FOXO1;NOTCH1;MECP2;TEAD1;NOTCH1	HS_Extend	PAAD
TOTAL	12	1	0.000815162	0.0281388	0.053256	38	0	0.00223918	49	1	4	1	0.000302366	AKT phosphorylates targets in the nucleus	FOXO1	HS_Extend	PAAD
TOTAL	118	2	0.00801576	0.032096	0.053256	415	0	0.0231687	507	2	47	8	0.0035528	Transcriptional regulation by RUNX3	NOTCH1;TEAD1	HS_Extend	PAAD
TOTAL	14	1	0.000951022	0.0327532	0.053256	34	0	0.001965	43	1	5	3	0.000377958	Regulation of localization of FOXO transcription factors	FOXO1	HS_Extend	PAAD
TOTAL	16	1	0.00108688	0.0373463	0.053256	29	0	0.001965	43	1	6	6	0.000453549	Signaling by NOTCH1 HD Domain Mutants in Cancer	NOTCH1	HS_Extend	PAAD
TOTAL	16	1	0.00108688	0.0373463	0.053256	29	0	0.001965	43	1	6	6	0.000453549	Constitutive Signaling by NOTCH1 HD Domain Mutants	NOTCH1	HS_Extend	PAAD
TOTAL	16	1	0.00108688	0.0373463	0.053256	11	0	0.00114244	25	1	7	5	0.000529141	RUNX3 regulates NOTCH signaling	NOTCH1	HS_Extend	PAAD
TOTAL	16	1	0.00108688	0.0373463	0.053256	183	0	0.00868254	190	1	9	3	0.000680324	Regulation of FOXO transcriptional activity by acetylation	FOXO1	HS_Extend	PAAD
TOTAL	18	1	0.00122274	0.0419183	0.053256	141	0	0.00694603	152	1	9	3	0.000680324	YAP1- and WWTR1 (TAZ)-stimulated gene expression	TEAD1	HS_Extend	PAAD
TOTAL	20	1	0.0013586	0.0464691	0.053256	21	0	0.0018736	41	1	4	1	0.000302366	Regulation of gene expression in late stage (branching morphogenesis) pancreatic bud precursor cells	NOTCH1	HS_Extend	PAAD
TOTAL	23	1	0.00156239	0.053256	0.053256	33	0	0.00255906	56	1	8	8	0.000604732	Pre-NOTCH Processing in Golgi	NOTCH1	HS_Extend	PAAD
TOTAL	23	1	0.00156239	0.053256	0.053256	175	0	0.00891103	195	1	15	12	0.00113387	FOXO-mediated transcription of cell death genes	FOXO1	HS_Extend	PAAD
TOTAL	26	1	0.00176618	0.059996	0.059996	109	0	0.00594068	130	1	9	1	0.000680324	NOTCH4 Intracellular Domain Regulates Transcription	NOTCH1	HS_Extend	PAAD
TOTAL	27	1	0.00183411	0.0622322	0.0622322	190	0	0.00982498	215	1	22	18	0.00166301	FOXO-mediated transcription of cell cycle genes	FOXO1	HS_Extend	PAAD
TOTAL	28	1	0.00190204	0.0644633	0.0644633	176	0	0.00900242	197	1	2	1	0.000151183	Notch-HLH transcription pathway	NOTCH1	HS_Extend	PAAD
TOTAL	32	1	0.00217377	0.0733363	0.0733363	64	0	0.00424987	93	1	21	19	0.00158742	Activated NOTCH1 Transmits Signal to the Nucleus	NOTCH1	HS_Extend	PAAD
TOTAL	32	1	0.00217377	0.0733363	0.0733363	291	0	0.0143033	313	1	18	1	0.00136065	Constitutive Signaling by AKT1 E17K in Cancer	FOXO1	HS_Extend	PAAD
TOTAL	35	1	0.00237756	0.0799374	0.0799374	138	0	0.00776859	170	1	12	3	0.000907098	Regulation of gene expression in beta cells	FOXO1	HS_Extend	PAAD
TOTAL	36	1	0.00244549	0.0821275	0.0821275	83	0	0.00525522	115	1	22	3	0.00166301	NOTCH3 Intracellular Domain Regulates Transcription	NOTCH1	HS_Extend	PAAD
TOTAL	39	1	0.00264928	0.0886677	0.0886677	179	0	0.00982498	215	1	26	2	0.00196538	EGR2 and SOX10-mediated initiation of Schwann cell myelination	TEAD1	HS_Extend	PAAD
TOTAL	216	2	0.0146729	0.0932221	0.0932221	153	0	0.016314	357	2	47	1	0.0035528	Interleukin-4 and Interleukin-13 signaling	FOXO1;FOXO1	HS_Extend	PAAD
TOTAL	118	5	0.00801576	3.44994e-05	0.00341144	415	0	0.0231687	507	5	47	12	0.0035528	Transcriptional regulation by RUNX3	RUNX1;LEF1;RUNX1;TEAD1	CS_DS_Extend	PAAD
TOTAL	4	2	0.000271721	7.58098e-05	0.00341144	0	0	0.00018279	4	2	2	2	0.000151183	RUNX3 regulates RUNX1-mediated transcription	RUNX1	CS_DS_Extend	PAAD
TOTAL	4	2	0.000271721	7.58098e-05	0.00341144	208	0	0.00964219	211	2	5	4	0.000377958	Regulation of TP53 Expression	PRDM1;PRDM1	CS_DS_Extend	PAAD
TOTAL	57	3	0.00387202	0.000778032	0.0193458	264	0	0.0140749	308	3	18	3	0.00136065	NOTCH1 Intracellular Domain Regulates Transcription	HEY1;NCOR2;HEY1	CS_DS_Extend	PAAD
TOTAL	68	3	0.00461925	0.00128972	0.0193458	229	0	0.0130695	286	3	21	3	0.00158742	Constitutive Signaling by NOTCH1 PEST Domain Mutants	HEY1;NCOR2;HEY1	CS_DS_Extend	PAAD
TOTAL	68	3	0.00461925	0.00128972	0.0193458	229	0	0.0130695	286	3	21	3	0.00158742	Constitutive Signaling by NOTCH1 HD+PEST Domain Mutants	HEY1;NCOR2;HEY1	CS_DS_Extend	PAAD
TOTAL	68	3	0.00461925	0.00128972	0.0193458	229	0	0.0130695	286	3	21	3	0.00158742	Signaling by NOTCH1 HD+PEST Domain Mutants in Cancer	HEY1;NCOR2;HEY1	CS_DS_Extend	PAAD
TOTAL	68	3	0.00461925	0.00128972	0.0193458	229	0	0.0130695	286	3	21	3	0.00158742	Signaling by NOTCH1 PEST Domain Mutants in Cancer	HEY1;NCOR2;HEY1	CS_DS_Extend	PAAD
TOTAL	68	3	0.00461925	0.00128972	0.0193458	229	0	0.0130695	286	3	39	3	0.00294807	Signaling by NOTCH1 in Cancer	HEY1;NCOR2;HEY1	CS_DS_Extend	PAAD
TOTAL	84	3	0.00570613	0.00234799	0.0289631	299	0	0.016771	367	3	39	3	0.00294807	Signaling by NOTCH1	HEY1;NCOR2;HEY1	CS_DS_Extend	PAAD
TOTAL	23	2	0.00156239	0.00241359	0.0289631	175	0	0.00891103	195	2	15	13	0.00113387	FOXO-mediated transcription of cell death genes	NFYB;FOXO1	CS_DS_Extend	PAAD
TOTAL	26	2	0.00176618	0.00306599	0.0337259	109	0	0.00594068	130	2	9	1	0.000680324	NOTCH4 Intracellular Domain Regulates Transcription	HEY1;HEY1	CS_DS_Extend	PAAD
TOTAL	32	2	0.00217377	0.00458946	0.0458946	148	0	0.00799708	175	2	19	18	0.00143624	Regulation of RUNX1 Expression and Activity	RUNX1;RUNX1	CS_DS_Extend	PAAD
TOTAL	36	2	0.00244549	0.00576274	0.0518647	83	0	0.00525522	115	2	22	2	0.00166301	NOTCH3 Intracellular Domain Regulates Transcription	HEY1;HEY1	CS_DS_Extend	PAAD
TOTAL	1554	11	0.105563	0.00726345	0.0645737	4640	0	0.260019	5690	11	824	216	0.0622874	Generic Transcription Pathway	RUNX1;PRDM1;NFYB;HEY1;LEF1;NCOR2;FOXO1;RUNX1;TEAD1;PRDM1	CS_DS_Extend	PAAD
TOTAL	258	4	0.017526	0.00857305	0.0645737	753	0	0.0441896	967	4	154	8	0.0116411	Signaling by NOTCH	RUNX1;HEY1;NCOR2;HEY1	CS_DS_Extend	PAAD
TOTAL	46	2	0.00312479	0.00922481	0.0645737	501	0	0.0244939	536	2	35	4	0.0026457	Regulation of TP53 Expression and Degradation	PRDM1;PRDM1	CS_DS_Extend	PAAD
TOTAL	1693	11	0.115006	0.0134783	0.0943481	4802	0	0.270621	5922	11	885	216	0.0668985	RNA Polymerase II Transcription	RUNX1;PRDM1;NFYB;HEY1;LEF1;NCOR2;FOXO1;RUNX1;TEAD1;PRDM1	CS_DS_Extend	PAAD
TOTAL	63	2	0.0042796	0.016733	0.0975864	223	0	0.012841	281	2	37	2	0.00279689	Signaling by NOTCH3	HEY1;HEY1	CS_DS_Extend	PAAD
TOTAL	6	1	0.000407581	0.0185778	0.0975864	11	0	0.000731161	16	1	2	2	0.000151183	AKT-mediated inactivation of FOXO1A	FOXO1	CS_DS_Extend	PAAD
TOTAL	6	1	0.000407581	0.0185778	0.0975864	18	0	0.00105104	23	1	2	1	0.000151183	RUNX2 regulates genes involved in differentiation of myeloid cells	RUNX1	CS_DS_Extend	PAAD
TOTAL	71	2	0.00482304	0.0209209	0.0975864	368	0	0.0195129	427	2	27	4	0.00204097	Transcriptional regulation of granulopoiesis	RUNX1;LEF1	CS_DS_Extend	PAAD
TOTAL	7	1	0.000475511	0.0216411	0.0975864	5	0	0.000548371	12	1	5	5	0.000377958	RUNX1 regulates transcription of genes involved in interleukin signaling	RUNX1	CS_DS_Extend	PAAD
TOTAL	7	1	0.000475511	0.0216411	0.0975864	74	0	0.00365581	80	1	4	4	0.000302366	RUNX1 regulates transcription of genes involved in BCR signaling	RUNX1	CS_DS_Extend	PAAD
TOTAL	8	1	0.000543441	0.0246951	0.0975864	52	0	0.00274185	60	1	6	6	0.000453549	RUNX1 regulates expression of components of tight junctions	RUNX1	CS_DS_Extend	PAAD
TOTAL	8	1	0.000543441	0.0246951	0.0975864	0	0	0.000365581	8	1	1	1	7.55915e-05	Loss of MECP2 binding ability to the NCoR/SMRT complex	NCOR2	CS_DS_Extend	PAAD
TOTAL	1851	11	0.125739	0.0248384	0.0975864	4993	0	0.282822	6189	11	996	216	0.0752891	Gene expression (Transcription)	RUNX1;PRDM1;NFYB;HEY1;LEF1;NCOR2;FOXO1;RUNX1;TEAD1;PRDM1	CS_DS_Extend	PAAD
TOTAL	9	1	0.000611372	0.0277397	0.0975864	64	0	0.00329023	72	1	4	4	0.000302366	RUNX1 regulates transcription of genes involved in WNT signaling	RUNX1	CS_DS_Extend	PAAD
TOTAL	9	1	0.000611372	0.0277397	0.0975864	11	0	0.000913951	20	1	3	3	0.000226775	RUNX3 regulates YAP1-mediated transcription	TEAD1	CS_DS_Extend	PAAD
TOTAL	10	1	0.000679302	0.030775	0.0975864	176	0	0.00845405	185	1	4	4	0.000302366	Binding of TCF/LEF:CTNNB1 to target gene promoters	LEF1	CS_DS_Extend	PAAD
TOTAL	10	1	0.000679302	0.030775	0.0975864	160	0	0.0075858	166	1	5	5	0.000377958	RUNX3 regulates WNT signaling	LEF1	CS_DS_Extend	PAAD
TOTAL	10	1	0.000679302	0.030775	0.0975864	96	0	0.00475255	104	1	8	7	0.000604732	RUNX1 regulates estrogen receptor mediated transcription	RUNX1	CS_DS_Extend	PAAD
TOTAL	92	2	0.00624958	0.0337108	0.0975864	202	0	0.0130238	285	2	20	1	0.00151183	Signaling by NOTCH4	HEY1;HEY1	CS_DS_Extend	PAAD
TOTAL	11	1	0.000747232	0.033801	0.0975864	57	0	0.00306174	67	1	7	7	0.000529141	RUNX1 regulates transcription of genes involved in differentiation of myeloid cells	RUNX1	CS_DS_Extend	PAAD
TOTAL	11	1	0.000747232	0.033801	0.0975864	32	0	0.001965	43	1	8	6	0.000604732	RUNX1 regulates transcription of genes involved in differentiation of keratinocytes	RUNX1	CS_DS_Extend	PAAD
TOTAL	12	1	0.000815162	0.0368179	0.0975864	38	0	0.00223918	49	1	4	1	0.000302366	AKT phosphorylates targets in the nucleus	FOXO1	CS_DS_Extend	PAAD
TOTAL	14	1	0.000951022	0.0428239	0.0975864	34	0	0.001965	43	1	5	3	0.000377958	Regulation of localization of FOXO transcription factors	FOXO1	CS_DS_Extend	PAAD
TOTAL	15	1	0.00101895	0.0458131	0.0975864	191	0	0.00918521	201	1	5	3	0.000377958	ATF6 (ATF6-alpha) activates chaperone genes	NFYB	CS_DS_Extend	PAAD
TOTAL	15	1	0.00101895	0.0458131	0.0975864	23	0	0.00159942	35	1	6	2	0.000453549	NR1H2 & NR1H3 regulate gene expression to control bile acid homeostasis	NCOR2	CS_DS_Extend	PAAD
TOTAL	110	2	0.00747232	0.0465292	0.0975864	633	0	0.0329936	722	2	85	66	0.00642528	FOXO-mediated transcription	NFYB;FOXO1	CS_DS_Extend	PAAD
TOTAL	16	1	0.00108688	0.0487932	0.0975864	259	0	0.0125668	275	1	7	4	0.000529141	Repression of WNT target genes	LEF1	CS_DS_Extend	PAAD
TOTAL	16	1	0.00108688	0.0487932	0.0975864	183	0	0.00868254	190	1	9	3	0.000680324	Regulation of FOXO transcriptional activity by acetylation	FOXO1	CS_DS_Extend	PAAD
TOTAL	16	1	0.00108688	0.0487932	0.0975864	99	0	0.00516383	113	1	8	2	0.000604732	RUNX3 regulates p14-ARF	RUNX1	CS_DS_Extend	PAAD
TOTAL	16	1	0.00108688	0.0487932	0.0975864	0	0	0.000731161	16	1	5	1	0.000377958	Pervasive developmental disorders	NCOR2	CS_DS_Extend	PAAD
TOTAL	16	1	0.00108688	0.0487932	0.0975864	0	0	0.000731161	16	1	5	1	0.000377958	Loss of function of MECP2 in Rett syndrome	NCOR2	CS_DS_Extend	PAAD
TOTAL	16	1	0.00108688	0.0487932	0.0975864	0	0	0.000731161	16	1	5	1	0.000377958	Disorders of Developmental Biology	NCOR2	CS_DS_Extend	PAAD
TOTAL	16	1	0.00108688	0.0487932	0.0975864	0	0	0.000731161	16	1	5	1	0.000377958	Disorders of Nervous System Development	NCOR2	CS_DS_Extend	PAAD
TOTAL	3	1	0.000203791	0.00264604	0.044727	0	0	0.000137093	3	1	1	1	7.55915e-05	Signaling by TCF7L2 mutants	CTBP1	CS_HS_Init	PAAD
TOTAL	10	1	0.000679302	0.00879502	0.044727	0	0	0.000456976	10	1	2	2	0.000151183	NR1H2 & NR1H3 regulate gene expression linked to triglyceride lipolysis in adipose	NR1H2	CS_HS_Init	PAAD
TOTAL	10	1	0.000679302	0.00879502	0.044727	39	0	0.00223918	49	1	2	2	0.000151183	NR1H2 & NR1H3 regulate gene expression to limit cholesterol uptake	NR1H2	CS_HS_Init	PAAD
TOTAL	174	2	0.0118198	0.00999343	0.044727	400	0	0.025682	562	2	41	4	0.00309925	PPARA activates gene expression	NFYB;NR1H2	CS_HS_Init	PAAD
TOTAL	176	2	0.0119557	0.0102143	0.044727	433	0	0.0270073	591	2	44	4	0.00332603	Regulation of lipid metabolism by PPARalpha	NFYB;NR1H2	CS_HS_Init	PAAD
TOTAL	12	1	0.000815162	0.0105454	0.044727	6	0	0.000822556	18	1	4	1	0.000302366	VLDLR internalisation and degradation	NR1H2	CS_HS_Init	PAAD
TOTAL	183	2	0.0124312	0.0110046	0.044727	1820	0	0.087191	1908	2	131	3	0.00990249	SUMO E3 ligases SUMOylate target proteins	CTBP1;NR1H2	CS_HS_Init	PAAD
TOTAL	192	2	0.0130426	0.0120596	0.044727	1857	0	0.0889732	1947	2	140	3	0.0105828	SUMOylation	CTBP1;NR1H2	CS_HS_Init	PAAD
TOTAL	15	1	0.00101895	0.0131657	0.044727	23	0	0.00159942	35	1	6	6	0.000453549	NR1H2 & NR1H3 regulate gene expression to control bile acid homeostasis	NR1H2	CS_HS_Init	PAAD
TOTAL	15	1	0.00101895	0.0131657	0.044727	191	0	0.00918521	201	1	5	3	0.000377958	ATF6 (ATF6-alpha) activates chaperone genes	NFYB	CS_HS_Init	PAAD
TOTAL	16	1	0.00108688	0.0140377	0.044727	259	0	0.0125668	275	1	7	2	0.000529141	Repression of WNT target genes	CTBP1	CS_HS_Init	PAAD
TOTAL	17	1	0.00115481	0.014909	0.044727	70	0	0.00397569	87	1	8	8	0.000604732	NR1H2 & NR1H3 regulate gene expression linked to lipogenesis	NR1H2	CS_HS_Init	PAAD
TOTAL	17	1	0.00115481	0.014909	0.044727	191	0	0.00927661	203	1	10	3	0.000755915	ATF6 (ATF6-alpha) activates chaperones	NFYB	CS_HS_Init	PAAD
TOTAL	23	1	0.00156239	0.0201218	0.0600832	175	0	0.00891103	195	1	15	3	0.00113387	FOXO-mediated transcription of cell death genes	NFYB	CS_HS_Init	PAAD
TOTAL	34	1	0.00230963	0.0296126	0.0600832	99	0	0.00584929	128	1	7	1	0.000529141	ATF4 activates genes in response to endoplasmic reticulum stress	NFYB	CS_HS_Init	PAAD
TOTAL	39	1	0.00264928	0.0338984	0.0600832	137	0	0.00763149	167	1	16	1	0.00120946	Signaling by WNT in cancer	CTBP1	CS_HS_Init	PAAD
TOTAL	40	1	0.00271721	0.0347535	0.0600832	648	0	0.0308459	675	1	25	1	0.00188979	SUMOylation of intracellular receptors	NR1H2	CS_HS_Init	PAAD
TOTAL	42	1	0.00285307	0.0364615	0.0600832	101	0	0.00621487	136	1	11	1	0.000831507	PERK regulates gene expression	NFYB	CS_HS_Init	PAAD
TOTAL	42	1	0.00285307	0.0364615	0.0600832	60	0	0.00429557	94	1	35	1	0.0026457	Plasma lipoprotein clearance	NR1H2	CS_HS_Init	PAAD
TOTAL	44	1	0.00298893	0.0381668	0.0600832	475	0	0.0228488	500	1	14	2	0.00105828	Deactivation of the beta-catenin transactivating complex	CTBP1	CS_HS_Init	PAAD
TOTAL	44	1	0.00298893	0.0381668	0.0600832	489	0	0.0233972	512	1	27	2	0.00204097	SUMOylation of transcription cofactors	CTBP1	CS_HS_Init	PAAD
TOTAL	66	1	0.00448339	0.0567417	0.0600832	282	0	0.0154458	338	1	40	32	0.00302366	NR1H3 & NR1H2 regulate gene expression linked to cholesterol transport and efflux	NR1H2	CS_HS_Init	PAAD
TOTAL	70	1	0.00475511	0.0600832	0.0600832	128	0	0.00881963	193	1	42	30	0.00317484	Activation of gene expression by SREBF (SREBP)	NFYB	CS_HS_Init	PAAD
TOTAL	85	1	0.00577406	0.0725166	0.0725166	376	0	0.0206096	451	1	60	50	0.00453549	NR1H2 and NR1H3-mediated signaling	NR1H2	CS_HS_Init	PAAD
TOTAL	86	1	0.00584199	0.0733401	0.0733401	31	0	0.00507243	111	1	2	2	0.000151183	Nuclear Receptor transcription pathway	NR1H2	CS_HS_Init	PAAD
TOTAL	86	1	0.00584199	0.0733401	0.0733401	162	0	0.0110588	242	1	52	30	0.00393076	Regulation of cholesterol biosynthesis by SREBP (SREBF)	NFYB	CS_HS_Init	PAAD
TOTAL	91	1	0.00618165	0.0774473	0.0774473	599	0	0.0308459	675	1	23	2	0.0017386	Degradation of beta-catenin by the destruction complex	CTBP1	CS_HS_Init	PAAD
TOTAL	98	1	0.00665716	0.0831692	0.0831692	245	0	0.0149431	327	1	84	1	0.00634969	Plasma lipoprotein assembly, remodeling, and clearance	NR1H2	CS_HS_Init	PAAD
TOTAL	110	1	0.00747232	0.0929021	0.0929021	633	0	0.0329936	722	1	85	3	0.00642528	FOXO-mediated transcription	NFYB	CS_HS_Init	PAAD
TOTAL	10	2	0.000679302	0.00127187	0.095933	47	0	0.00251337	55	2	8	2	0.000604732	MECP2 regulates transcription factors	PPARG;PPARG	GalNAc_Olinked	PAAD
TOTAL	1263	15	0.0857958	0.00183172	0.095933	3128	0	0.184755	4043	15	556	69	0.0420289	Developmental Biology	HNF4G;PPARG;PDX1;HNF4A;SRC;HNF4A;SMAD3;HNF4G;KLF5;PPARG;PDX1;KLF5	GalNAc_Olinked	PAAD
TOTAL	108	4	0.00733646	0.00244208	0.095933	446	0	0.024174	529	4	18	15	0.00136065	Transcriptional regulation of white adipocyte differentiation	PPARG;KLF5;PPARG;KLF5	GalNAc_Olinked	PAAD
TOTAL	14	2	0.000951022	0.00245982	0.095933	22	0	0.00164511	36	2	6	3	0.000453549	Regulation of gene expression in early pancreatic precursor cells	PDX1;PDX1	GalNAc_Olinked	PAAD
TOTAL	4	2	0.000271721	0.00012503	0.0116278	208	0	0.00964219	211	2	5	4	0.000377958	Regulation of TP53 Expression	PRDM1;PRDM1	Gangliosides	PAAD
TOTAL	71	3	0.00482304	0.000600268	0.0318142	368	0	0.0195129	427	3	27	6	0.00204097	Transcriptional regulation of granulopoiesis	CEBPB;CEBPB	P1PK_BloodGroup	PAAD
TOTAL	34	2	0.00230963	0.00284902	0.0601664	99	0	0.00584929	128	2	7	1	0.000529141	ATF4 activates genes in response to endoplasmic reticulum stress	ATF3;ATF3	Type_1_2_LacNAc	PCPG
TOTAL	42	2	0.00285307	0.0042976	0.0601664	101	0	0.00621487	136	2	11	1	0.000831507	PERK regulates gene expression	ATF3;ATF3	Type_1_2_LacNAc	PCPG
TOTAL	9	1	0.000611372	0.00548891	0.0658669	0	0	0.000411278	9	1	2	1	0.000151183	Phase 3 - rapid repolarisation	ERG	O_fucose	PCPG
TOTAL	87	2	0.00590992	0.00152295	0.0203417	257	0	0.0151716	332	2	32	16	0.00241893	Transcriptional activation of mitochondrial biogenesis	NRF1;NRF1	N_linked_branching	PCPG
TOTAL	127	2	0.00862713	0.00319857	0.0203417	391	0	0.0228488	500	2	36	16	0.00272129	Mitochondrial biogenesis	NRF1;NRF1	N_linked_branching	PCPG
TOTAL	6	1	0.000407581	0.00406834	0.0203417	3	0	0.000411278	9	1	3	3	0.000226775	p75NTR negatively regulates cell cycle via SC1	PRDM4	N_linked_branching	PCPG
TOTAL	335	2	0.0227566	0.0206384	0.0625797	823	0	0.0484851	1061	2	86	16	0.00650087	Organelle biogenesis and maintenance	NRF1;NRF1	N_linked_branching	PCPG
TOTAL	31	1	0.00210584	0.0208599	0.0625797	78	0	0.00484394	106	1	17	2	0.00128506	HDMs demethylate histones	KDM3A	N_linked_branching	PCPG
TOTAL	66	1	0.00448339	0.0439401	0.0878802	282	0	0.0154458	338	1	40	2	0.00302366	NR1H3 & NR1H2 regulate gene expression linked to cholesterol transport and efflux	KDM3A	N_linked_branching	PCPG
TOTAL	34	2	0.00230963	0.00207771	0.062795	99	0	0.00584929	128	2	7	1	0.000529141	ATF4 activates genes in response to endoplasmic reticulum stress	ATF3;ATF3	P1PK_BloodGroup	PCPG
TOTAL	42	2	0.00285307	0.00313975	0.062795	101	0	0.00621487	136	2	11	1	0.000831507	PERK regulates gene expression	ATF3;ATF3	P1PK_BloodGroup	PCPG
TOTAL	28	1	0.00190204	0.0281539	0.0917206	23	0	0.00233058	51	1	4	4	0.000302366	RNA Polymerase III Transcription Initiation From Type 3 Promoter	SNAPC5	GSL_Core	PCPG
TOTAL	36	1	0.00244549	0.036061	0.0917206	23	0	0.00269616	59	1	13	4	0.00098269	RNA Polymerase III Transcription Initiation	SNAPC5	GSL_Core	PCPG
TOTAL	46	1	0.00312479	0.0458603	0.0917206	33	0	0.00361011	79	1	25	6	0.00188979	RNA Polymerase III Transcription	SNAPC5	GSL_Core	PCPG
TOTAL	46	1	0.00312479	0.0458603	0.0917206	10	0	0.00255906	56	1	13	3	0.00098269	RNA Polymerase III Abortive And Retractive Initiation	SNAPC5	GSL_Core	PCPG
TOTAL	6	1	0.000407581	0.0077157	0.0734643	11	0	0.000731161	16	1	2	2	0.000151183	AKT-mediated inactivation of FOXO1A	FOXO1	sulfated_glycans	PRAD
TOTAL	647	4	0.0439508	0.0085052	0.0734643	2096	0	0.116072	2540	4	493	31	0.0372666	Signaling by Interleukins	STAT5B;FOXO1;MEF2A;FOXO1	sulfated_glycans	PRAD
TOTAL	9	1	0.000611372	0.0115524	0.0734643	0	0	0.000411278	9	1	3	3	0.000226775	STAT5 Activation	STAT5B	sulfated_glycans	PRAD
TOTAL	9	1	0.000611372	0.0115524	0.0734643	0	0	0.000411278	9	1	3	3	0.000226775	Erythropoietin activates STAT5	STAT5B	sulfated_glycans	PRAD
TOTAL	12	1	0.000815162	0.015375	0.0734643	1	0	0.000594068	13	1	5	2	0.000377958	Interleukin-21 signaling	STAT5B	sulfated_glycans	PRAD
TOTAL	12	1	0.000815162	0.015375	0.0734643	38	0	0.00223918	49	1	4	1	0.000302366	AKT phosphorylates targets in the nucleus	FOXO1	sulfated_glycans	PRAD
TOTAL	13	1	0.000883092	0.0166461	0.0734643	127	0	0.00635196	139	1	19	5	0.00143624	Signaling by Leptin	STAT5B	sulfated_glycans	PRAD
TOTAL	14	1	0.000951022	0.0179156	0.0734643	34	0	0.001965	43	1	5	3	0.000377958	Regulation of localization of FOXO transcription factors	FOXO1	sulfated_glycans	PRAD
TOTAL	16	1	0.00108688	0.02045	0.0734643	183	0	0.00868254	190	1	9	3	0.000680324	Regulation of FOXO transcriptional activity by acetylation	FOXO1	sulfated_glycans	PRAD
TOTAL	16	1	0.00108688	0.02045	0.0734643	132	0	0.00662615	145	1	13	4	0.00098269	Interleukin-9 signaling	STAT5B	sulfated_glycans	PRAD
TOTAL	16	1	0.00108688	0.02045	0.0734643	358	0	0.0165882	363	1	17	5	0.00128506	Interleukin-15 signaling	STAT5B	sulfated_glycans	PRAD
TOTAL	18	1	0.00122274	0.0229782	0.0734643	47	0	0.00292464	64	1	14	2	0.00105828	Prolactin receptor signaling	STAT5B	sulfated_glycans	PRAD
TOTAL	19	1	0.00129067	0.02424	0.0734643	82	0	0.00438697	96	1	19	5	0.00143624	Interleukin-2 signaling	STAT5B	sulfated_glycans	PRAD
TOTAL	21	1	0.00142653	0.0267589	0.0734643	102	0	0.00552941	121	1	14	13	0.00105828	STAT5 activation downstream of FLT3 ITD mutants	STAT5B	sulfated_glycans	PRAD
TOTAL	23	1	0.00156239	0.0292717	0.0734643	175	0	0.00891103	195	1	15	12	0.00113387	FOXO-mediated transcription of cell death genes	FOXO1	sulfated_glycans	PRAD
TOTAL	216	2	0.0146729	0.0312019	0.0734643	153	0	0.016314	357	2	47	1	0.0035528	Interleukin-4 and Interleukin-13 signaling	FOXO1;FOXO1	sulfated_glycans	PRAD
TOTAL	26	1	0.00176618	0.0330294	0.0734643	32	0	0.00260476	57	1	7	1	0.000529141	ERK/MAPK targets	MEF2A	sulfated_glycans	PRAD
TOTAL	26	1	0.00176618	0.0330294	0.0734643	167	0	0.00868254	190	1	14	1	0.00105828	Signaling by cytosolic FGFR1 fusion mutants	STAT5B	sulfated_glycans	PRAD
TOTAL	27	1	0.00183411	0.0342789	0.0734643	190	0	0.00982498	215	1	22	18	0.00166301	FOXO-mediated transcription of cell cycle genes	FOXO1	sulfated_glycans	PRAD
TOTAL	28	1	0.00190204	0.0355268	0.0734643	129	0	0.00703743	154	1	11	4	0.000831507	Signaling by phosphorylated juxtamembrane, extracellular and kinase domain KIT mutants	STAT5B	sulfated_glycans	PRAD
TOTAL	29	1	0.00196997	0.0367733	0.0734643	116	0	0.00635196	139	1	28	5	0.00211656	Growth hormone receptor signaling	STAT5B	sulfated_glycans	PRAD
TOTAL	29	1	0.00196997	0.0367733	0.0734643	187	0	0.0094137	206	1	56	3	0.00423312	Interleukin-20 family signaling	STAT5B	sulfated_glycans	PRAD
TOTAL	30	1	0.00203791	0.0380182	0.0734643	482	0	0.0228488	500	1	24	13	0.0018142	Signaling by FLT3 ITD and TKD mutants	STAT5B	sulfated_glycans	PRAD
TOTAL	32	1	0.00217377	0.0405034	0.0734643	212	0	0.0107846	236	1	18	8	0.00136065	Signaling by FLT3 fusion proteins	STAT5B	sulfated_glycans	PRAD
TOTAL	32	1	0.00217377	0.0405034	0.0734643	103	0	0.00603208	132	1	14	2	0.00105828	Myogenesis	MEF2A	sulfated_glycans	PRAD
TOTAL	32	1	0.00217377	0.0405034	0.0734643	291	0	0.0143033	313	1	18	1	0.00136065	Constitutive Signaling by AKT1 E17K in Cancer	FOXO1	sulfated_glycans	PRAD
TOTAL	35	1	0.00237756	0.0442198	0.0734643	138	0	0.00776859	170	1	12	3	0.000907098	Regulation of gene expression in beta cells	FOXO1	sulfated_glycans	PRAD
TOTAL	35	1	0.00237756	0.0442198	0.0734643	168	0	0.00895672	196	1	24	3	0.0018142	Signaling by Erythropoietin	STAT5B	sulfated_glycans	PRAD
TOTAL	35	1	0.00237756	0.0442198	0.0734643	205	0	0.0104647	229	1	16	1	0.00120946	MAPK targets/ Nuclear events mediated by MAP kinases	MEF2A	sulfated_glycans	PRAD
TOTAL	36	1	0.00244549	0.0454556	0.0734643	150	0	0.00822556	180	1	26	9	0.00196538	Interleukin-7 signaling	STAT5B	sulfated_glycans	PRAD
TOTAL	37	1	0.00251342	0.0466899	0.0734643	301	0	0.014806	324	1	16	1	0.00120946	Downstream signal transduction	STAT5B	sulfated_glycans	PRAD
TOTAL	1108	4	0.0752666	0.0499444	0.0734643	2824	0	0.165288	3617	4	687	39	0.0519314	Cytokine Signaling in Immune system	STAT5B;FOXO1;MEF2A;FOXO1	sulfated_glycans	PRAD
TOTAL	43	1	0.002921	0.0540638	0.0734643	129	0	0.00772289	169	1	26	4	0.00196538	Signaling by KIT in disease	STAT5B	sulfated_glycans	PRAD
TOTAL	48	1	0.00326065	0.0601674	0.0734643	170	0	0.00977928	214	1	25	1	0.00188979	FGFR1 mutant receptor activation	STAT5B	sulfated_glycans	PRAD
TOTAL	49	1	0.00332858	0.0613837	0.0734643	205	0	0.0113787	249	1	34	29	0.00257011	FOXO-mediated transcription of oxidative stress, metabolic and neuronal genes	FOXO1	sulfated_glycans	PRAD
TOTAL	50	1	0.00339651	0.0625984	0.0734643	360	0	0.0177764	389	1	38	5	0.00287248	Interleukin-3, Interleukin-5 and GM-CSF signaling	STAT5B	sulfated_glycans	PRAD
TOTAL	52	1	0.00353237	0.0650234	0.0734643	430	0	0.0208381	456	1	59	16	0.0044599	Interleukin-2 family signaling	STAT5B	sulfated_glycans	PRAD
TOTAL	58	1	0.00393995	0.0722629	0.0734643	227	0	0.0126582	277	1	35	1	0.0026457	Signaling by FGFR1 in disease	STAT5B	sulfated_glycans	PRAD
TOTAL	59	1	0.00400788	0.0734643	0.0734643	484	0	0.024174	529	1	52	15	0.00393076	FLT3 signaling in disease	STAT5B	sulfated_glycans	PRAD
TOTAL	64	1	0.00434753	0.0794493	0.0794493	471	0	0.0234429	513	1	43	3	0.00325043	FLT3 Signaling	STAT5B	sulfated_glycans	PRAD
TOTAL	66	1	0.00448339	0.081833	0.081833	346	0	0.0180505	395	1	39	4	0.00294807	Signaling by SCF-KIT	STAT5B	sulfated_glycans	PRAD
TOTAL	67	1	0.00455132	0.0830226	0.0830226	161	0	0.0102363	224	1	26	3	0.00196538	Regulation of beta-cell development	FOXO1	sulfated_glycans	PRAD
TOTAL	69	1	0.00468718	0.0853976	0.0853976	238	0	0.0131152	287	1	32	1	0.00241893	MAP kinase activation	MEF2A	sulfated_glycans	PRAD
TOTAL	77	1	0.00523062	0.0948392	0.0948392	239	0	0.0135265	296	1	35	1	0.0026457	Interleukin-17 signaling	MEF2A	sulfated_glycans	PRAD
TOTAL	80	1	0.00543441	0.0983559	0.0983559	350	0	0.0191016	418	1	48	1	0.00362839	Nuclear Events (kinase and transcription factor activation)	MEF2A	sulfated_glycans	PRAD
TOTAL	14	2	0.000951022	0.000688692	0.0757561	22	0	0.00164511	36	2	6	1	0.000453549	Regulation of gene expression in early pancreatic precursor cells	NR5A2;NR5A2	SA_paths	PRAD
TOTAL	86	3	0.00584199	0.00167594	0.0921765	31	0	0.00507243	111	3	2	2	0.000151183	Nuclear Receptor transcription pathway	NR5A2	SA_paths	PRAD
TOTAL	21	2	0.00142653	0.000504681	0.0398698	132	0	0.00680894	149	2	16	2	0.00120946	POU5F1 (OCT4), SOX2, NANOG activate genes related to proliferation	STAT3;STAT3	O_mannose	PRAD
TOTAL	45	2	0.00305686	0.00226524	0.0853291	231	0	0.0124297	272	2	35	4	0.0026457	Transcriptional regulation of pluripotent stem cells	STAT3;STAT3	O_mannose	PRAD
TOTAL	200	3	0.013586	0.0036235	0.0853291	658	0	0.0367408	804	3	90	6	0.00680324	Cellular Senescence	KDM6B;STAT3;KDM6B	O_mannose	PRAD
TOTAL	216	3	0.0146729	0.00449101	0.0853291	153	0	0.016314	357	3	47	19	0.0035528	Interleukin-4 and Interleukin-13 signaling	RORA;STAT3;RORA	O_mannose	PRAD
TOTAL	5	1	0.000339651	0.00778285	0.0878034	84	0	0.00402139	88	1	1	1	7.55915e-05	Signalling to STAT3	STAT3	O_mannose	PRAD
TOTAL	5	1	0.000339651	0.00778285	0.0878034	84	0	0.00402139	88	1	4	4	0.000302366	MET activates STAT3	STAT3	O_mannose	PRAD
TOTAL	7	1	0.000475511	0.0108797	0.0878034	126	0	0.00598638	131	1	9	6	0.000680324	PTK6 Activates STAT3	STAT3	O_mannose	PRAD
TOTAL	104	2	0.00706474	0.0114423	0.0878034	502	0	0.026596	582	2	59	12	0.0044599	Circadian Clock	RORA;RORA	O_mannose	PRAD
TOTAL	114	2	0.00774404	0.0136194	0.0878034	355	0	0.0204725	448	2	40	5	0.00302366	Oxidative Stress Induced Senescence	KDM6B;KDM6B	O_mannose	PRAD
TOTAL	11	1	0.000747232	0.0170458	0.0878034	160	0	0.0075858	166	1	12	6	0.000907098	Interleukin-23 signaling	STAT3	O_mannose	PRAD
TOTAL	11	1	0.000747232	0.0170458	0.0878034	63	0	0.00301604	66	1	4	1	0.000302366	BH3-only proteins associate with and inactivate anti-apoptotic BCL-2 members	STAT3	O_mannose	PRAD
TOTAL	12	1	0.000815162	0.0185816	0.0878034	1	0	0.000594068	13	1	5	2	0.000377958	Interleukin-21 signaling	STAT3	O_mannose	PRAD
TOTAL	13	1	0.000883092	0.020115	0.0878034	127	0	0.00635196	139	1	19	5	0.00143624	Signaling by Leptin	STAT3	O_mannose	PRAD
TOTAL	13	1	0.000883092	0.020115	0.0878034	196	0	0.0093223	204	1	20	5	0.00151183	Interleukin-27 signaling	STAT3	O_mannose	PRAD
TOTAL	16	1	0.00108688	0.0247017	0.0878034	132	0	0.00662615	145	1	13	5	0.00098269	Interleukin-9 signaling	STAT3	O_mannose	PRAD
TOTAL	16	1	0.00108688	0.0247017	0.0878034	358	0	0.0165882	363	1	17	5	0.00128506	Interleukin-15 signaling	STAT3	O_mannose	PRAD
TOTAL	16	1	0.00108688	0.0247017	0.0878034	180	0	0.00868254	190	1	26	3	0.00196538	Interleukin-35 Signalling	STAT3	O_mannose	PRAD
TOTAL	18	1	0.00122274	0.027748	0.0878034	112	0	0.00575789	126	1	20	6	0.00151183	Interleukin-6 signaling	STAT3	O_mannose	PRAD
TOTAL	19	1	0.00129067	0.0292678	0.0878034	121	0	0.00630627	138	1	7	1	0.000529141	Signaling by PDGFRA extracellular domain mutants	STAT3	O_mannose	PRAD
TOTAL	19	1	0.00129067	0.0292678	0.0878034	121	0	0.00630627	138	1	7	1	0.000529141	Signaling by PDGFRA transmembrane, juxtamembrane and kinase domain mutants	STAT3	O_mannose	PRAD
TOTAL	25	1	0.00169825	0.0383388	0.0937896	58	0	0.0037929	83	1	4	4	0.000302366	RORA activates gene expression	RORA	O_mannose	PRAD
TOTAL	26	1	0.00176618	0.0398427	0.0937896	167	0	0.00868254	190	1	14	1	0.00105828	Signaling by cytosolic FGFR1 fusion mutants	STAT3	O_mannose	PRAD
TOTAL	28	1	0.00190204	0.0428438	0.0937896	129	0	0.00703743	154	1	11	4	0.000831507	Signaling by phosphorylated juxtamembrane, extracellular and kinase domain KIT mutants	STAT3	O_mannose	PRAD
TOTAL	29	1	0.00196997	0.044341	0.0937896	187	0	0.0094137	206	1	56	26	0.00423312	Interleukin-20 family signaling	STAT3	O_mannose	PRAD
TOTAL	29	1	0.00196997	0.044341	0.0937896	116	0	0.00635196	139	1	28	2	0.00211656	Growth hormone receptor signaling	STAT3	O_mannose	PRAD
TOTAL	31	1	0.00210584	0.0473286	0.0937896	139	0	0.00735731	161	1	34	6	0.00257011	Interleukin-6 family signaling	STAT3	O_mannose	PRAD
TOTAL	31	1	0.00210584	0.0473286	0.0937896	78	0	0.00484394	106	1	17	2	0.00128506	HDMs demethylate histones	KDM6B	O_mannose	PRAD
TOTAL	36	1	0.00244549	0.0547587	0.0937896	150	0	0.00822556	180	1	26	3	0.00196538	Interleukin-7 signaling	STAT3	O_mannose	PRAD
TOTAL	36	1	0.00244549	0.0547587	0.0937896	199	0	0.0105561	231	1	14	1	0.00105828	Interleukin-37 signaling	STAT3	O_mannose	PRAD
TOTAL	37	1	0.00251342	0.0562381	0.0937896	301	0	0.014806	324	1	16	1	0.00120946	Downstream signal transduction	STAT3	O_mannose	PRAD
TOTAL	40	1	0.00271721	0.0606629	0.0937896	3	0	0.001965	43	1	2	1	0.000151183	Association of TriC/CCT with target proteins during biosynthesis	STAT3	O_mannose	PRAD
TOTAL	40	1	0.00271721	0.0606629	0.0937896	648	0	0.0308459	675	1	25	2	0.00188979	SUMOylation of intracellular receptors	RORA	O_mannose	PRAD
TOTAL	42	1	0.00285307	0.0636017	0.0937896	130	0	0.00776859	170	1	24	2	0.0018142	Signaling by PDGFR in disease	STAT3	O_mannose	PRAD
TOTAL	43	1	0.002921	0.0650678	0.0937896	129	0	0.00772289	169	1	26	4	0.00196538	Signaling by KIT in disease	STAT3	O_mannose	PRAD
TOTAL	48	1	0.00326065	0.0723655	0.0937896	170	0	0.00977928	214	1	25	1	0.00188979	FGFR1 mutant receptor activation	STAT3	O_mannose	PRAD
TOTAL	647	3	0.0439508	0.0781002	0.0937896	2096	0	0.116072	2540	3	493	84	0.0372666	Signaling by Interleukins	RORA;STAT3;RORA	O_mannose	PRAD
TOTAL	52	1	0.00353237	0.0781643	0.0937896	430	0	0.0208381	456	1	59	12	0.0044599	Interleukin-2 family signaling	STAT3	O_mannose	PRAD
TOTAL	58	1	0.00393995	0.0867977	0.0937896	227	0	0.0126582	277	1	35	1	0.0026457	Signaling by FGFR1 in disease	STAT3	O_mannose	PRAD
TOTAL	61	1	0.00414374	0.0910853	0.0937896	305	0	0.0152173	333	1	62	1	0.00468667	Intrinsic Pathway for Apoptosis	STAT3	O_mannose	PRAD
TOTAL	700	3	0.0475511	0.0937896	0.0937896	1231	0	0.0827126	1810	3	230	6	0.017386	Cellular responses to stress	KDM6B;STAT3;KDM6B	O_mannose	PRAD
TOTAL	66	1	0.00448339	0.0981886	0.0981886	346	0	0.0180505	395	1	39	4	0.00294807	Signaling by SCF-KIT	STAT3	O_mannose	PRAD
TOTAL	718	3	0.0487739	0.0994044	0.0994044	1262	0	0.0848604	1857	3	261	6	0.0197294	Cellular responses to external stimuli	KDM6B;STAT3;KDM6B	O_mannose	PRAD
TOTAL	34	2	0.00230963	0.000888628	0.0741231	99	0	0.00584929	128	2	7	1	0.000529141	ATF4 activates genes in response to endoplasmic reticulum stress	ATF3;ATF3	HA_Synthesis	PRAD
TOTAL	42	2	0.00285307	0.00134769	0.0741231	101	0	0.00621487	136	2	11	1	0.000831507	PERK regulates gene expression	ATF3;ATF3	HA_Synthesis	PRAD
TOTAL	18	3	0.00122274	9.70369e-06	0.00081511	141	0	0.00694603	152	3	9	6	0.000680324	YAP1- and WWTR1 (TAZ)-stimulated gene expression	RUNX2;YAP1	CS_DS_Extend	PRAD
TOTAL	34	3	0.00230963	6.38188e-05	0.00203739	237	0	0.0122926	269	3	24	24	0.0018142	RUNX2 regulates osteoblast differentiation	RUNX2;YAP1	CS_DS_Extend	PRAD
TOTAL	6	2	0.000407581	8.69771e-05	0.00203739	18	0	0.00105104	23	2	2	2	0.000151183	RUNX2 regulates genes involved in differentiation of myeloid cells	RUNX2	CS_DS_Extend	PRAD
TOTAL	7	2	0.000475511	0.00011822	0.00203739	36	0	0.0019193	42	2	4	4	0.000302366	RUNX2 regulates chondrocyte maturation	RUNX2	CS_DS_Extend	PRAD
TOTAL	43	3	0.002921	0.000127337	0.00203739	278	0	0.014349	314	3	32	32	0.00241893	RUNX2 regulates bone development	RUNX2;YAP1	CS_DS_Extend	PRAD
TOTAL	11	2	0.000747232	0.000290297	0.00387351	57	0	0.00306174	67	2	7	1	0.000529141	RUNX1 regulates transcription of genes involved in differentiation of myeloid cells	RUNX2	CS_DS_Extend	PRAD
TOTAL	147	4	0.00998573	0.000322792	0.00387351	567	0	0.0314856	689	4	84	84	0.00634969	Transcriptional regulation by RUNX2	RUNX2;YAP1;RUNX2	CS_DS_Extend	PRAD
TOTAL	14	2	0.000951022	0.00046826	0.0046826	6	0	0.000913951	20	2	7	7	0.000529141	RUNX2 regulates genes involved in cell migration	RUNX2	CS_DS_Extend	PRAD
TOTAL	83	3	0.0056382	0.000861618	0.00775456	202	0	0.0128867	282	3	32	32	0.00241893	Regulation of RUNX2 expression and activity	RUNX2;RUNX2	CS_DS_Extend	PRAD
TOTAL	6	1	0.000407581	0.0133628	0.0838197	11	0	0.000731161	16	1	2	2	0.000151183	AKT-mediated inactivation of FOXO1A	FOXO1	CS_DS_Extend	PRAD
TOTAL	9	1	0.000611372	0.0199791	0.0838197	0	0	0.000411278	9	1	3	3	0.000226775	STAT5 Activation	STAT5B	CS_DS_Extend	PRAD
TOTAL	9	1	0.000611372	0.0199791	0.0838197	0	0	0.000411278	9	1	3	3	0.000226775	Erythropoietin activates STAT5	STAT5B	CS_DS_Extend	PRAD
TOTAL	9	1	0.000611372	0.0199791	0.0838197	11	0	0.000913951	20	1	3	3	0.000226775	RUNX3 regulates YAP1-mediated transcription	YAP1	CS_DS_Extend	PRAD
TOTAL	261	3	0.0177298	0.0204608	0.0838197	860	0	0.0492163	1077	3	132	6	0.00997808	Transcriptional regulation by RUNX1	RUNX2;YAP1	CS_DS_Extend	PRAD
TOTAL	10	1	0.000679302	0.022175	0.0838197	176	0	0.00845405	185	1	4	2	0.000302366	Binding of TCF/LEF:CTNNB1 to target gene promoters	TCF7	CS_DS_Extend	PRAD
TOTAL	10	1	0.000679302	0.022175	0.0838197	160	0	0.0075858	166	1	5	1	0.000377958	RUNX3 regulates WNT signaling	TCF7	CS_DS_Extend	PRAD
TOTAL	12	1	0.000815162	0.0265524	0.0838197	1	0	0.000594068	13	1	5	2	0.000377958	Interleukin-21 signaling	STAT5B	CS_DS_Extend	PRAD
TOTAL	12	1	0.000815162	0.0265524	0.0838197	38	0	0.00223918	49	1	4	1	0.000302366	AKT phosphorylates targets in the nucleus	FOXO1	CS_DS_Extend	PRAD
TOTAL	13	1	0.000883092	0.028734	0.0838197	127	0	0.00635196	139	1	19	5	0.00143624	Signaling by Leptin	STAT5B	CS_DS_Extend	PRAD
TOTAL	118	2	0.00801576	0.028782	0.0838197	415	0	0.0231687	507	2	47	4	0.0035528	Transcriptional regulation by RUNX3	TCF7;YAP1	CS_DS_Extend	PRAD
TOTAL	14	1	0.000951022	0.0309109	0.0838197	34	0	0.001965	43	1	5	3	0.000377958	Regulation of localization of FOXO transcription factors	FOXO1	CS_DS_Extend	PRAD
TOTAL	16	1	0.00108688	0.0352503	0.0838197	259	0	0.0125668	275	1	7	4	0.000529141	Repression of WNT target genes	TCF7	CS_DS_Extend	PRAD
TOTAL	16	1	0.00108688	0.0352503	0.0838197	183	0	0.00868254	190	1	9	3	0.000680324	Regulation of FOXO transcriptional activity by acetylation	FOXO1	CS_DS_Extend	PRAD
TOTAL	16	1	0.00108688	0.0352503	0.0838197	132	0	0.00662615	145	1	13	4	0.00098269	Interleukin-9 signaling	STAT5B	CS_DS_Extend	PRAD
TOTAL	16	1	0.00108688	0.0352503	0.0838197	358	0	0.0165882	363	1	17	5	0.00128506	Interleukin-15 signaling	STAT5B	CS_DS_Extend	PRAD
TOTAL	18	1	0.00122274	0.039571	0.0838197	47	0	0.00292464	64	1	14	2	0.00105828	Prolactin receptor signaling	STAT5B	CS_DS_Extend	PRAD
TOTAL	19	1	0.00129067	0.0417243	0.0838197	82	0	0.00438697	96	1	19	5	0.00143624	Interleukin-2 signaling	STAT5B	CS_DS_Extend	PRAD
TOTAL	21	1	0.00142653	0.0460168	0.0838197	102	0	0.00552941	121	1	14	13	0.00105828	STAT5 activation downstream of FLT3 ITD mutants	STAT5B	CS_DS_Extend	PRAD
TOTAL	22	1	0.00149446	0.0481561	0.0838197	206	0	0.00987068	216	1	30	7	0.00226775	Signaling by Hippo	YAP1	CS_DS_Extend	PRAD
TOTAL	23	1	0.00156239	0.0502907	0.0838197	175	0	0.00891103	195	1	15	12	0.00113387	FOXO-mediated transcription of cell death genes	FOXO1	CS_DS_Extend	PRAD
TOTAL	26	1	0.00176618	0.0566667	0.0838197	167	0	0.00868254	190	1	14	1	0.00105828	Signaling by cytosolic FGFR1 fusion mutants	STAT5B	CS_DS_Extend	PRAD
TOTAL	27	1	0.00183411	0.0587828	0.0838197	190	0	0.00982498	215	1	22	18	0.00166301	FOXO-mediated transcription of cell cycle genes	FOXO1	CS_DS_Extend	PRAD
TOTAL	28	1	0.00190204	0.0608943	0.0838197	129	0	0.00703743	154	1	11	4	0.000831507	Signaling by phosphorylated juxtamembrane, extracellular and kinase domain KIT mutants	STAT5B	CS_DS_Extend	PRAD
[truncated: 1,024 more rows]
