# Supplementary material for: A systems-based framework to computationally describe putative transcription factors and signaling pathways regulating glycan biosynthesis
Source: publisher site journal article supplement (doi:10.3762/bjoc.17.119), 2021-07-22
Supplement: Additional file 3 [file Table_S6.xlsx]

## Sheet: glycogene_network_glycoPath_enr
Network cluster-enriched glycosylation pathways
clustName	glycoPath	pEnrich	ctype
cl_2	Dolichol	0.0144106	ACC
cl_2	N_linked_branching	0.0172257	BLCA
cl_1	Complex_Nlinked	0.0070318	BLCA
cl_4	sulfated_glycans	0.000278517	BLCA
cl_4	Terminal_Fucose	0.00358657	BLCA
cl_4	SA_paths	8.178e-11	BLCA
cl_4	O_fucose	0.00358657	BLCA
cl_4	CS_DS_Extend	2.41383e-07	BLCA
cl_4	CS_HS_Init	0.00482521	BLCA
cl_4	Gangliosides	2.41383e-07	BLCA
cl_3	Dolichol	0.021672	BLCA
cl_2	sulfated_glycans	8.93496e-15	BRCA_1
cl_2	Terminal_Fucose	6.57922e-06	BRCA_1
cl_2	SA_paths	8.69745e-18	BRCA_1
cl_2	Type_1_2_LacNAc	0.00203267	BRCA_1
cl_2	O_fucose	0.00161748	BRCA_1
cl_2	HA_Synthesis	3.99263e-05	BRCA_1
cl_2	CS_DS_Extend	2.68323e-16	BRCA_1
cl_2	N_linked_branching	0.00922474	BRCA_1
cl_2	Gangliosides	4.99236e-11	BRCA_1
cl_2	P1PK_BloodGroup	0.0417202	BRCA_1
cl_4	Complex_Nlinked	6.32202e-06	BRCA_1
cl_4	Dolichol	0.000300888	BRCA_1
cl_1	GPI_Anchor	0.028719	BRCA_1
cl_1	LacdiNAc	0.000173006	BRCA_1
cl_1	O_fucose	0.028719	BRCA_1
cl_1	O_mannose	3.47268e-06	BRCA_1
cl_1	CS_HS_Init	0.00096743	BRCA_1
cl_3	GPI_Anchor	0.00316613	BRCA_1
cl_3	Dolichol	0.00316613	BRCA_1
cl_2	sulfated_glycans	1.8813e-06	BRCA_2
cl_2	Terminal_Fucose	0.000101278	BRCA_2
cl_2	SA_paths	2.2011e-09	BRCA_2
cl_2	O_fucose	2.7468e-05	BRCA_2
cl_2	CS_DS_Extend	0.0274366	BRCA_2
cl_2	GalNAc_Olinked	0.0205948	BRCA_2
cl_2	Gangliosides	7.27834e-05	BRCA_2
cl_1	Complex_Nlinked	0.011046	BRCA_2
cl_1	Dolichol	0.0127848	BRCA_2
cl_3	LacdiNAc	0.0151854	BRCA_2
cl_3	O_mannose	0.0249692	BRCA_2
cl_3	CS_HS_Init	0.000133181	BRCA_2
cl_4	sulfated_glycans	5.51114e-09	CESC
cl_4	Terminal_Fucose	4.43451e-05	CESC
cl_4	SA_paths	7.76555e-12	CESC
cl_4	O_fucose	7.616e-07	CESC
cl_4	N_linked_branching	0.0108445	CESC
cl_4	Gangliosides	1.32754e-06	CESC
cl_4	GSL_Core	0.0108445	CESC
cl_2	P1PK_BloodGroup	0.0416489	CESC
cl_2	SA_paths	0.000145908	COAD_READ.
cl_2	HS_Extend	0.000105974	COAD_READ.
cl_2	CS_DS_Extend	5.52214e-17	COAD_READ.
cl_2	CS_HS_Init	0.00670217	COAD_READ.
cl_2	Gangliosides	0.000631651	COAD_READ.
cl_2	GSL_Core	0.024478	COAD_READ.
cl_4	O_fucose	1.20499e-05	COAD_READ.
cl_4	Dolichol	1.77074e-09	COAD_READ.
cl_3	Type_1_2_LacNAc	0.00180062	COAD_READ.
cl_3	N_linked_branching	0.040021	COAD_READ.
cl_1	Complex_Nlinked	2.04851e-08	COAD_READ.
cl_2	Complex_Nlinked	0.00680334	GBM.
cl_1	GPI_Anchor	0.00058136	GBM.
cl_1	sulfated_glycans	7.0723e-06	GBM.
cl_1	LacdiNAc	0.00176815	GBM.
cl_1	Type_1_2_LacNAc	0.000750559	GBM.
cl_1	O_fucose	0.00058136	GBM.
cl_1	O_mannose	0.00058136	GBM.
cl_1	Dolichol	0.00548272	GBM.
cl_1	Gangliosides	0.0315713	GBM.
cl_1	P1PK_BloodGroup	2.67276e-05	GBM.
cl_1	GSL_Core	0.000389848	GBM.
cl_4	SA_paths	1.28601e-05	GBM.
cl_4	Type_1_2_LacNAc	0.0160449	GBM.
cl_4	O_fucose	0.00165693	GBM.
cl_4	CS_DS_Extend	0.00309442	GBM.
cl_4	GalNAc_Olinked	3.28567e-08	GBM.
cl_4	N_linked_branching	0.000153458	GBM.
cl_1	sulfated_glycans	1.1427e-08	HNSC
cl_1	Terminal_Fucose	0.0011532	HNSC
cl_1	SA_paths	4.30667e-21	HNSC
cl_1	O_fucose	1.68256e-05	HNSC
cl_1	CS_DS_Extend	2.76564e-15	HNSC
cl_1	N_linked_branching	0.000251154	HNSC
cl_1	Gangliosides	1.95075e-10	HNSC
cl_2	Complex_Nlinked	4.11526e-05	HNSC
cl_2	Dolichol	1.00536e-05	HNSC
cl_3	GPI_Anchor	2.83682e-10	HNSC
cl_3	Dolichol	5.39612e-06	HNSC
cl_1	Complex_Nlinked	2.37793e-05	KICH
cl_2	GPI_Anchor	0.00043878	KICH
cl_3	O_fucose	2.13602e-05	KICH
cl_9	CS_HS_Init	0.00109367	KICH
cl_6	LacdiNAc	0.0268281	KICH
cl_2	sulfated_glycans	0.000202927	KIRC
cl_2	LacdiNAc	5.82881e-05	KIRC
cl_2	O_fucose	0.0060371	KIRC
cl_2	GalNAc_Olinked	0.00014784	KIRC
cl_3	N_linked_branching	0.0132835	KIRC
cl_3	Complex_Nlinked	0.0102603	KIRC
cl_3	Dolichol	0.00277885	KIRC
cl_1	Terminal_Fucose	1.42376e-06	KIRC
cl_1	Blood_Groups	4.95471e-12	KIRC
cl_1	SA_paths	7.38863e-12	KIRC
cl_1	HS_Extend	1.25998e-05	KIRC
cl_1	CS_DS_Extend	9.84842e-08	KIRC
cl_1	CS_HS_Init	9.0722e-07	KIRC
cl_1	Gangliosides	1.56446e-11	KIRC
cl_1	Complex_Nlinked	4.62024e-06	KIRP
cl_4	HS_Extend	0.0222583	KIRP
cl_3	sulfated_glycans	0.0157554	KIRP
cl_3	Terminal_Fucose	0.0197094	KIRP
cl_3	SA_paths	0.01233	KIRP
cl_3	Type_1_2_LacNAc	0.00238484	KIRP
cl_2	GPI_Anchor	0.00135349	KIRP
cl_2	O_fucose	1.53631e-09	KIRP
cl_2	O_mannose	0.0135902	KIRP
cl_2	CS_HS_Init	0.000138571	KIRP
cl_2	Dolichol	0.0434406	KIRP
cl_2	Gangliosides	0.00135349	KIRP
cl_2	GPI_Anchor	0.00806468	LAML
cl_2	HS_Extend	0.00249385	LAML
cl_2	Dolichol	3.2695e-08	LAML
cl_1	sulfated_glycans	0.00984567	LAML
cl_1	LacdiNAc	9.17592e-07	LAML
cl_1	Blood_Groups	0.00246328	LAML
cl_1	SA_paths	2.2344e-05	LAML
cl_1	Type_1_2_LacNAc	1.44266e-09	LAML
cl_1	O_fucose	2.99585e-05	LAML
cl_1	CS_DS_Extend	0.00246328	LAML
cl_1	GalNAc_Olinked	0.0304048	LAML
cl_1	N_linked_branching	3.60295e-06	LAML
cl_3	GPI_Anchor	0.00689495	LAML
cl_3	O_fucose	0.000539622	LAML
cl_3	O_mannose	2.32506e-10	LAML
cl_3	CS_HS_Init	0.000539622	LAML
cl_3	Complex_Nlinked	0.00434125	LAML
cl_3	Gangliosides	0.000539622	LAML
cl_4	Dolichol	2.76267e-09	LGG
cl_1	GPI_Anchor	0.0363215	LGG
cl_1	sulfated_glycans	1.44402e-06	LGG
cl_1	LacdiNAc	0.00334186	LGG
cl_1	O_fucose	1.74956e-06	LGG
cl_1	O_mannose	1.68154e-06	LGG
cl_1	CS_HS_Init	0.00122845	LGG
cl_1	P1PK_BloodGroup	0.00748054	LGG
cl_1	GSL_Core	0.00607378	LGG
cl_2	sulfated_glycans	3.2125e-05	LGG
cl_2	Terminal_Fucose	0.000571227	LGG
cl_2	Blood_Groups	0.00109743	LGG
cl_2	SA_paths	6.17424e-23	LGG
cl_2	Type_1_2_LacNAc	9.8244e-09	LGG
cl_2	O_fucose	0.0108269	LGG
cl_2	HS_Extend	1.72463e-06	LGG
cl_2	GalNAc_Olinked	4.31578e-06	LGG
cl_2	Gangliosides	1.30895e-05	LGG
cl_2	P1PK_BloodGroup	0.000193144	LGG
cl_2	sulfated_glycans	0.00525876	LIHC
cl_2	Type_1_2_LacNAc	0.00332109	LIHC
cl_2	O_fucose	0.000182107	LIHC
cl_2	O_mannose	3.12574e-06	LIHC
cl_2	Dolichol	0.00332109	LIHC
cl_2	P1PK_BloodGroup	0.000182107	LIHC
cl_2	GSL_Core	0.00225612	LIHC
cl_3	SA_paths	0.000208628	LIHC
cl_3	sulfated_glycans	2.76759e-08	LUAD
cl_3	Terminal_Fucose	8.59711e-05	LUAD
cl_3	SA_paths	2.47252e-11	LUAD
cl_3	O_fucose	0.00554041	LUAD
cl_3	CS_DS_Extend	0.000168824	LUAD
cl_3	Gangliosides	1.85086e-10	LUAD
cl_2	Complex_Nlinked	0.0032414	LUAD
cl_1	Dolichol	0.00127294	LUAD
cl_4	GPI_Anchor	0.00869165	LUAD
cl_4	Type_1_2_LacNAc	0.00562637	LUAD
cl_4	O_mannose	3.51414e-06	LUAD
cl_4	GSL_Core	0.000261287	LUAD
cl_5	GalNAc_Olinked	0.000471405	LUAD
cl_1	sulfated_glycans	0.00343389	LUSC
cl_1	Terminal_Fucose	0.000955126	LUSC
cl_1	SA_paths	0.000955126	LUSC
cl_1	O_fucose	0.000535946	LUSC
cl_1	N_linked_branching	0.0318232	LUSC
cl_2	CS_DS_Extend	0.0430534	LUSC
cl_5	GPI_Anchor	0.00224323	LUSC
cl_5	LacdiNAc	0.0290537	LUSC
cl_1	Complex_Nlinked	2.06233e-07	MESO
cl_3	GPI_Anchor	0.0265772	MESO
cl_6	CS_DS_Extend	1.48688e-05	MESO
cl_3	CS_DS_Extend	0.000508018	OV
cl_1	O_mannose	0.00318102	OV
cl_2	GPI_Anchor	0.0191644	OV
cl_2	HS_Extend	0.0411589	OV
cl_1	Complex_Nlinked	1.02328e-08	PAAD
cl_1	Dolichol	4.80744e-07	PAAD
cl_2	GPI_Anchor	5.56893e-05	PAAD
cl_2	Terminal_Fucose	0.00256054	PAAD
cl_2	LacdiNAc	3.35312e-07	PAAD
cl_2	Blood_Groups	1.76442e-07	PAAD
cl_2	Type_1_2_LacNAc	4.04811e-16	PAAD
cl_2	O_mannose	1.76442e-07	PAAD
cl_2	GalNAc_Olinked	1.1182e-15	PAAD
cl_2	P1PK_BloodGroup	0.035514	PAAD
cl_3	sulfated_glycans	1.58466e-14	PAAD
cl_3	SA_paths	8.14412e-45	PAAD
cl_3	O_fucose	5.50728e-06	PAAD
cl_3	HS_Extend	7.9505e-08	PAAD
cl_3	CS_DS_Extend	5.95704e-13	PAAD
cl_3	N_linked_branching	0.0130828	PAAD
cl_3	Gangliosides	7.48653e-39	PAAD
cl_1	Complex_Nlinked	0.00133306	PCPG
cl_2	GPI_Anchor	0.0321316	PCPG
cl_2	sulfated_glycans	0.000230849	PCPG
cl_2	Terminal_Fucose	0.0185615	PCPG
cl_2	Blood_Groups	0.000862286	PCPG
cl_2	SA_paths	0.000268831	PCPG
cl_2	Type_1_2_LacNAc	9.47856e-05	PCPG
cl_2	O_fucose	1.72362e-09	PCPG
cl_2	O_mannose	0.00216264	PCPG
cl_2	HA_Synthesis	0.0298017	PCPG
cl_2	P1PK_BloodGroup	1.72362e-09	PCPG
cl_5	Complex_Nlinked	2.31335e-09	PRAD
cl_5	Dolichol	1.79644e-09	PRAD
cl_2	GPI_Anchor	3.5677e-07	PRAD
cl_2	LacdiNAc	0.00342497	PRAD
cl_2	O_fucose	0.00204953	PRAD
cl_2	CS_HS_Init	8.99187e-08	PRAD
cl_1	sulfated_glycans	8.42444e-15	PRAD
cl_1	Terminal_Fucose	0.0322429	PRAD
cl_1	LacdiNAc	0.000815797	PRAD
cl_1	Blood_Groups	0.00107218	PRAD
cl_1	SA_paths	2.23249e-24	PRAD
cl_1	Type_1_2_LacNAc	7.40582e-14	PRAD
cl_1	O_fucose	0.00241699	PRAD
cl_1	O_mannose	0.00988306	PRAD
cl_1	HA_Synthesis	2.6722e-05	PRAD
cl_1	HS_Extend	0.0164819	PRAD
cl_1	CS_DS_Extend	3.79428e-19	PRAD
cl_1	GalNAc_Olinked	1.13383e-06	PRAD
cl_1	Gangliosides	2.52097e-20	PRAD
cl_1	P1PK_BloodGroup	0.000210371	PRAD
cl_2	sulfated_glycans	0.00265167	SARC
cl_2	Terminal_Fucose	1.30038e-05	SARC
cl_2	LacdiNAc	0.00632823	SARC
cl_2	Blood_Groups	0.00786594	SARC
cl_2	SA_paths	0.00265167	SARC
cl_2	Type_1_2_LacNAc	0.00480442	SARC
cl_2	O_fucose	0.00304876	SARC
cl_2	N_linked_branching	0.00447684	SARC
cl_2	Gangliosides	0.0164622	SARC
cl_1	Dolichol	0.00966958	SARC
cl_7	O_mannose	0.00379819	SARC
cl_7	CS_HS_Init	0.00379819	SARC
cl_1	sulfated_glycans	0.0400449	SKCM
cl_1	Terminal_Fucose	0.000485373	SKCM
cl_1	LacdiNAc	0.0139601	SKCM
cl_1	SA_paths	0.000586111	SKCM
cl_1	CS_DS_Extend	0.000586111	SKCM
cl_1	GalNAc_Olinked	0.0400449	SKCM
cl_1	Gangliosides	0.0400449	SKCM
cl_2	Dolichol	8.37421e-07	SKCM
cl_4	CS_HS_Init	0.0165835	SKCM
cl_1	sulfated_glycans	7.06357e-09	STES.
cl_1	SA_paths	1.71197e-30	STES.
cl_1	O_fucose	0.000234056	STES.
cl_1	HA_Synthesis	0.0111662	STES.
cl_1	HS_Extend	0.0315803	STES.
cl_1	CS_DS_Extend	1.07835e-23	STES.
cl_1	Gangliosides	8.99061e-27	STES.
cl_3	GPI_Anchor	0.0299797	STES.
cl_3	GalNAc_Olinked	0.00857128	STES.
cl_3	Complex_Nlinked	2.14638e-07	STES.
cl_3	Dolichol	0.0137205	STES.
cl_2	GPI_Anchor	1.24087e-07	STES.
cl_2	LacdiNAc	0.0225854	STES.
cl_2	Type_1_2_LacNAc	2.86487e-05	STES.
cl_2	Dolichol	1.34179e-13	STES.
cl_2	P1PK_BloodGroup	0.0434566	STES.
cl_2	sulfated_glycans	0.000196169	TGCT
cl_2	Terminal_Fucose	2.07083e-06	TGCT
cl_2	LacdiNAc	8.80366e-05	TGCT
cl_2	Blood_Groups	1.58904e-08	TGCT
cl_2	SA_paths	2.48925e-09	TGCT
cl_2	O_fucose	0.000237849	TGCT
cl_2	Gangliosides	3.53512e-05	TGCT
cl_3	Type_1_2_LacNAc	0.0376097	TGCT
cl_3	HA_Synthesis	0.0024098	TGCT
cl_3	CS_DS_Extend	0.0024098	TGCT
cl_3	GalNAc_Olinked	0.00658444	TGCT
cl_1	O_mannose	3.07741e-05	TGCT
cl_7	GPI_Anchor	0.000923195	TGCT
cl_7	Complex_Nlinked	0.00828519	TGCT
cl_2	sulfated_glycans	6.53888e-13	THCA
cl_2	Terminal_Fucose	1.11622e-13	THCA
cl_2	Blood_Groups	0.0332164	THCA
cl_2	Type_1_2_LacNAc	3.7821e-22	THCA
cl_2	O_fucose	0.0184215	THCA
cl_2	O_mannose	1.59098e-07	THCA
cl_2	CS_DS_Extend	1.32923e-08	THCA
cl_2	GalNAc_Olinked	3.175e-08	THCA
cl_2	N_linked_branching	0.00604562	THCA
cl_2	P1PK_BloodGroup	2.35416e-16	THCA
cl_2	GSL_Core	3.00879e-12	THCA
cl_4	Complex_Nlinked	7.76803e-12	THCA
cl_4	Dolichol	0.00355116	THCA
cl_1	GPI_Anchor	0.00218078	THCA
cl_1	LacdiNAc	0.000881137	THCA
cl_1	SA_paths	8.53612e-07	THCA
cl_1	O_fucose	2.25977e-06	THCA
cl_1	CS_HS_Init	0.000881137	THCA
cl_1	Dolichol	0.0219857	THCA
cl_1	Gangliosides	6.92359e-08	THCA
cl_1	SA_paths	0.0220754	THYM
cl_1	CS_HS_Init	0.0190799	THYM
cl_1	N_linked_branching	6.0284e-17	THYM
cl_1	Dolichol	0.0220754	THYM
cl_2	O_mannose	0.00110261	THYM
cl_2	P1PK_BloodGroup	0.000475146	THYM
cl_3	sulfated_glycans	1.88762e-05	THYM
cl_3	LacdiNAc	0.00567125	THYM
cl_3	Blood_Groups	6.9846e-06	THYM
cl_4	sulfated_glycans	5.83104e-06	THYM
cl_4	Terminal_Fucose	1.6755e-08	THYM
cl_4	SA_paths	0.00661069	THYM
cl_1	CS_DS_Extend	0.0450335	UCEC
cl_1	CS_HS_Init	0.00223249	UCEC
cl_3	GSL_Core	0.0252024	UCEC
cl_4	Dolichol	0.00405675	UCEC
cl_2	GPI_Anchor	0.000207138	UCEC
cl_5	LacdiNAc	0.0220601	UCEC
cl_5	SA_paths	0.0167744	UCEC
cl_5	GalNAc_Olinked	0.000261377	UCEC
cl_2	N_linked_branching	0.000394739	UVM
cl_1	CS_HS_Init	0.0331609	UVM
cl_1	GalNAc_Olinked	0.0276632	UVM
