# Supplementary material for: A systems-based framework to computationally describe putative transcription factors and signaling pathways regulating glycan biosynthesis
Source: publisher site journal article supplement (doi:10.3762/bjoc.17.119), 2021-07-22
Supplement: Additional file 3 [file Table_S7.xlsx]

## Sheet: glycogene_network_TFpath_enrich
Network cluster enriched signaling pathways from Reactome
path	entities	value	clustName	ctype
Transcription of E2F targets under negative control by p107 (RBL1) and p130 (RBL2) in complex with HDAC1	E2F1;MYBL2;MYBL2;TFDP1;E2F1;RBL1	0.000243157	cl_1	BLCA
G0 and Early G1	E2F1;MYBL2;RBL1;MYBL2;TFDP1;E2F1;RBL1	0.000360821	cl_1	BLCA
Transcriptional Regulation by E2F6	E2F1;CBX3;BRCA1;BRCA1;TFDP1;E2F1;EZH2	0.000822591	cl_1	BLCA
Transcription of E2F targets under negative control by DREAM complex	E2F1;RBL1;TFDP1;E2F1;RBL1	0.00357372	cl_1	BLCA
TP53 Regulates Transcription of Genes Involved in G1 Cell Cycle Arrest	E2F7;E2F1;E2F1;E2F7	0.0169632	cl_1	BLCA
TP53 Regulates Transcription of Cell Cycle Genes	E2F7;E2F1;TFDP1;E2F1;RBL1;E2F7	0.0270902	cl_1	BLCA
Regulation of TP53 Expression	PRDM1;PRDM1	0.0192192	cl_4	BLCA
RUNX2 regulates genes involved in differentiation of myeloid cells	RUNX2	0.0192192	cl_4	BLCA
RUNX2 regulates chondrocyte maturation	RUNX2	0.0192192	cl_4	BLCA
Regulation of RUNX2 expression and activity	RUNX2;STAT1;RUNX2	0.0199168	cl_4	BLCA
RUNX1 regulates transcription of genes involved in differentiation of myeloid cells	RUNX2	0.0275668	cl_4	BLCA
RUNX2 regulates genes involved in cell migration	RUNX2	0.0324915	cl_4	BLCA
NGF-stimulated transcription	LYL1;EGR2;EGR2	0.0324915	cl_4	BLCA
RUNX1 and FOXP3 control the development of regulatory T lymphocytes (Tregs)	FOXP3;FOXP3	0.0324915	cl_4	BLCA
Interferon Signaling	CIITA;STAT1;IRF1;CIITA;IRF1	0.0324915	cl_4	BLCA
Interleukin-6 signaling	STAT1	0.0324915	cl_4	BLCA
YAP1- and WWTR1 (TAZ)-stimulated gene expression	RUNX2	0.0324915	cl_4	BLCA
Transcriptional regulation by RUNX2	RUNX2;STAT1;RUNX2	0.047736	cl_4	BLCA
Nuclear Events (kinase and transcription factor activation)	LYL1;EGR2;EGR2	0.0507917	cl_4	BLCA
Interferon gamma signaling	CIITA;STAT1;IRF1;CIITA;IRF1	0.0507917	cl_4	BLCA
Signaling by phosphorylated juxtamembrane, extracellular and kinase domain KIT mutants	STAT1	0.0507917	cl_4	BLCA
Regulation of IFNA signaling	STAT1	0.0507917	cl_4	BLCA
Transcriptional regulation by RUNX1	RUNX2;FOXP3;FOXP3;CBX6	0.0513962	cl_4	BLCA
Interleukin-6 family signaling	STAT1	0.0513962	cl_4	BLCA
RUNX2 regulates osteoblast differentiation	RUNX2	0.0612467	cl_4	BLCA
Interferon alpha/beta signaling	STAT1;IRF1;IRF1	0.0634671	cl_4	BLCA
EGR2 and SOX10-mediated initiation of Schwann cell myelination	EGR2;EGR2	0.0634671	cl_4	BLCA
RUNX2 regulates bone development	RUNX2	0.0761954	cl_4	BLCA
Signaling by KIT in disease	STAT1	0.0761954	cl_4	BLCA
Regulation of TP53 Expression and Degradation	PRDM1;PRDM1	0.0863858	cl_4	BLCA
HDMs demethylate histones	KDM2B;KDM5B;KDM4C;PHF8	0.0563301	cl_3	BLCA
Nuclear Events (kinase and transcription factor activation)	FOS;SRF;LYL1;EGR1;MEF2C;MEF2A;EGR2;JUNB;EGR2;EGR1	0.00115099	cl_2	BRCA_1
NGF-stimulated transcription	FOS;SRF;LYL1;EGR1;EGR2;JUNB;EGR2;EGR1	0.00212949	cl_2	BRCA_1
RUNX3 regulates WNT signaling	RUNX3;TCF7;TCF7L1;TCF7L2	0.00278605	cl_2	BRCA_1
Binding of TCF/LEF:CTNNB1 to target gene promoters	RUNX3;TCF7;TCF7L1;TCF7L2	0.00278605	cl_2	BRCA_1
MECP2 regulates transcription factors	PPARG;MEF2C;MEF2C;PPARG	0.00278605	cl_2	BRCA_1
RUNX3 regulates RUNX1-mediated transcription	RUNX3;RUNX1	0.00351419	cl_2	BRCA_1
Interferon alpha/beta signaling	IRF8;IRF5;STAT1;IRF4;IRF8;STAT2;IRF1;IRF5;EGR1;IRF4;IRF1;EGR1	0.00361945	cl_2	BRCA_1
RUNX2 regulates genes involved in differentiation of myeloid cells	RUNX1;RUNX2	0.00854636	cl_2	BRCA_1
RUNX2 regulates chondrocyte maturation	RUNX2;GLI2	0.012047	cl_2	BRCA_1
Signaling by NTRK1 (TRKA)	FOS;SRF;LYL1;EGR1;MEF2C;MEF2A;EGR2;JUNB;EGR2;EGR1	0.013527	cl_2	BRCA_1
Interleukin-4 and Interleukin-13 signaling	JUNB;RORA;FOS;STAT1;IRF4;FOS;RORA;STAT1;IRF4;FOXO1;JUNB;FOXO1	0.0256189	cl_2	BRCA_1
RUNX1 regulates transcription of genes involved in differentiation of myeloid cells	RUNX1;RUNX2	0.0324279	cl_2	BRCA_1
Signaling by NTRKs	FOS;SRF;LYL1;EGR1;MEF2C;MEF2A;EGR2;JUNB;EGR2;EGR1	0.0324279	cl_2	BRCA_1
Interleukin-21 signaling	STAT4;STAT1;STAT5A	0.0362006	cl_2	BRCA_1
Transcriptional regulation by RUNX3	RUNX1;RUNX3;TCF7;YAP1;RUNX1;TCF7L1;TCF7L2	0.039824	cl_2	BRCA_1
Interleukin-20 family signaling	STAT4;STAT1;STAT2;STAT5A	0.0447248	cl_2	BRCA_1
Regulation of TP53 Expression	PRDM1;PRDM1	0.0447248	cl_2	BRCA_1
Repression of WNT target genes	TCF7;TCF7L1;TCF7L2	0.0447248	cl_2	BRCA_1
Interferon Signaling	IRF8;CIITA;IRF5;IRF4;IRF8;IRF1;EGR1;CIITA;EGR1;STAT1;STAT2;IRF5;IRF4;IRF1	0.0447248	cl_2	BRCA_1
RUNX1 and FOXP3 control the development of regulatory T lymphocytes (Tregs)	RUNX1;FOXP3;FOXP3	0.0447248	cl_2	BRCA_1
MAPK targets/ Nuclear events mediated by MAP kinases	FOS;MEF2C;JUN;MEF2A	0.0447248	cl_2	BRCA_1
Transcriptional regulation of white adipocyte differentiation	EBF1;PPARG;CEBPA;EBF1;EGR2;PPARG;CEBPA	0.0456764	cl_2	BRCA_1
YAP1- and WWTR1 (TAZ)-stimulated gene expression	RUNX2;YAP1	0.0489368	cl_2	BRCA_1
Nuclear Receptor transcription pathway	NR2F1;RORA;PPARG;NR5A2	0.0538205	cl_2	BRCA_1
EGR2 and SOX10-mediated initiation of Schwann cell myelination	YAP1;EGR2;SOX10;EGR2	0.0585812	cl_2	BRCA_1
RUNX2 regulates bone development	RUNX2;YAP1;GLI2	0.0785194	cl_2	BRCA_1
Interferon gamma signaling	IRF8;CIITA;IRF5;STAT1;IRF4;IRF8;IRF1;IRF5;IRF4;CIITA;IRF1	0.0785194	cl_2	BRCA_1
Deactivation of the beta-catenin transactivating complex	SOX17;TCF7;TCF7L1;TCF7L2	0.0785194	cl_2	BRCA_1
Transcriptional regulation of granulopoiesis	RUNX1;CEBPA;CEBPA;FLI1	0.0905625	cl_2	BRCA_1
Loss of MECP2 binding ability to 5hmC-DNA	MECP2	0.0819563	cl_1	BRCA_1
G0 and Early G1	E2F1;MYBL2;MYBL2;E2F1	0.000470061	cl_3	BRCA_1
TP53 Regulates Transcription of Cell Cycle Genes	E2F7;E2F1;E2F1;E2F7	0.00280932	cl_3	BRCA_1
TFAP2A acts as a transcriptional repressor during retinoic acid induced cell differentiation	MYBL2;MYBL2	0.0121075	cl_3	BRCA_1
Transcriptional regulation by the AP-2 (TFAP2) family of transcription factors	MYBL2;MYBL2;YY1	0.0180957	cl_3	BRCA_1
Transcriptional Regulation by TP53	E2F7;E2F1;FANCD2;FANCD2;E2F1;E2F7	0.0295446	cl_3	BRCA_1
Polo-like kinase mediated events	MYBL2;FOXM1	0.045023	cl_3	BRCA_1
Mitotic G1 phase and G1/S transition	E2F1;MYBL2;MYBL2;E2F1	0.045023	cl_3	BRCA_1
Transcription of E2F targets under negative control by DREAM complex	E2F1;E2F1	0.045023	cl_3	BRCA_1
TP53 Regulates Transcription of DNA Repair Genes	FANCD2;FANCD2	0.0454476	cl_3	BRCA_1
Interferon gamma signaling	IRF8;CIITA;IRF5;IRF4;IRF8;IRF2;IRF1;CIITA;STAT1;IRF5;IRF4;IRF2;IRF1	0.000135284	cl_2	BRCA_2
Interferon Signaling	IRF8;CIITA;IRF5;IRF4;IRF8;IRF2;IRF1;CIITA;STAT1;STAT2;IRF5;IRF4;IRF2;IRF1	0.000135284	cl_2	BRCA_2
Cytokine Signaling in Immune system	IRF8;CIITA;IRF5;IRF4;IRF8;IRF2;IRF1;MEF2C;MEF2A;CIITA;STAT4;STAT1;STAT2;IRF5;STAT1;IRF4;FOXO1;IRF2;BATF;IRF1;FOXO1;BATF	0.00838548	cl_2	BRCA_2
Regulation of TP53 Expression	PRDM1;PRDM1	0.0302674	cl_2	BRCA_2
Interleukin-4 and Interleukin-13 signaling	STAT1;IRF4;STAT1;IRF4;FOXO1;BATF;FOXO1;BATF	0.0443689	cl_2	BRCA_2
RUNX2 regulates genes involved in differentiation of myeloid cells	RUNX2	0.0480333	cl_2	BRCA_2
RUNX2 regulates chondrocyte maturation	RUNX2	0.0563051	cl_2	BRCA_2
Regulation of IFNA signaling	STAT1;STAT2	0.0607117	cl_2	BRCA_2
Interleukin-20 family signaling	STAT4;STAT1;STAT2	0.0611569	cl_2	BRCA_2
Myogenesis	MEF2B;MEF2C;MEF2A	0.0614775	cl_2	BRCA_2
RUNX3 regulates WNT signaling	RUNX3;LEF1	0.0614775	cl_2	BRCA_2
Binding of TCF/LEF:CTNNB1 to target gene promoters	RUNX3;LEF1	0.0614775	cl_2	BRCA_2
MECP2 regulates transcription factors	MEF2C;MEF2C	0.0614775	cl_2	BRCA_2
RUNX2 regulates osteoblast differentiation	RUNX2;MAF	0.0614775	cl_2	BRCA_2
RUNX1 regulates transcription of genes involved in differentiation of myeloid cells	RUNX2	0.0614775	cl_2	BRCA_2
Activation of HOX genes during differentiation	RARA;MAFB;HOXB4;HOXB4	0.0614775	cl_2	BRCA_2
Activation of anterior HOX genes in hindbrain development during early embryogenesis	RARA;MAFB;HOXB4;HOXB4	0.0614775	cl_2	BRCA_2
Interleukin-21 signaling	STAT4;STAT1	0.0678366	cl_2	BRCA_2
RUNX2 regulates genes involved in cell migration	RUNX2	0.0797943	cl_2	BRCA_2
RUNX2 regulates bone development	RUNX2;MAF	0.0797943	cl_2	BRCA_2
Regulation of RUNX2 expression and activity	RUNX2;STAT1;RUNX2	0.0797943	cl_2	BRCA_2
Signaling by Interleukins	STAT4;STAT1;IRF4;STAT2;STAT1;MEF2C;IRF4;FOXO1;MEF2A;BATF;FOXO1;BATF	0.0855343	cl_2	BRCA_2
Interleukin-35 Signalling	STAT4;STAT1	0.0855343	cl_2	BRCA_2
RUNX1 and FOXP3 control the development of regulatory T lymphocytes (Tregs)	FOXP3;FOXP3	0.0935442	cl_2	BRCA_2
Interleukin-6 signaling	STAT1	0.0935442	cl_2	BRCA_2
YAP1- and WWTR1 (TAZ)-stimulated gene expression	RUNX2	0.0935442	cl_2	BRCA_2
Cohesin Loading onto Chromatin	SMC3;SMC1A	0.0758785	cl_4	BRCA_2
Establishment of Sister Chromatid Cohesion	SMC3;SMC1A	0.0758785	cl_4	BRCA_2
Mitotic Telophase/Cytokinesis	SMC3;SMC1A	0.0758785	cl_4	BRCA_2
IRF3-mediated induction of type I IFN	MRE11A;PRKDC	0.0895369	cl_4	BRCA_2
Interleukin-20 family signaling	STAT4;STAT1;STAT2;STAT5A	0.000127762	cl_4	CESC
Interleukin-21 signaling	STAT4;STAT1;STAT5A	0.000286424	cl_4	CESC
Regulation of IFNA signaling	STAT1;STAT2	0.0024225	cl_4	CESC
Signaling by phosphorylated juxtamembrane, extracellular and kinase domain KIT mutants	STAT1;STAT5A	0.0024225	cl_4	CESC
Interleukin-4 and Interleukin-13 signaling	STAT1;IRF4;STAT1;IRF4;BATF;BATF	0.0024225	cl_4	CESC
Signaling by Interleukins	STAT4;STAT1;IRF4;STAT2;STAT5A;STAT1;IRF4;BATF;BATF	0.0024225	cl_4	CESC
Signaling by KIT in disease	STAT1;STAT5A	0.00602417	cl_4	CESC
Interleukin-2 family signaling	STAT4;STAT1;STAT5A	0.0103807	cl_4	CESC
Interleukin-35 Signalling	STAT4;STAT1	0.0120304	cl_4	CESC
Interleukin-9 signaling	STAT1;STAT5A	0.0120304	cl_4	CESC
RUNX1 and FOXP3 control the development of regulatory T lymphocytes (Tregs)	FOXP3;FOXP3	0.0127416	cl_4	CESC
Interleukin-6 signaling	STAT1	0.0127416	cl_4	CESC
Signaling by SCF-KIT	STAT1;STAT5A	0.0127416	cl_4	CESC
Signaling by cytosolic FGFR1 fusion mutants	STAT1;STAT5A	0.0257908	cl_4	CESC
Growth hormone receptor signaling	STAT1;STAT5A	0.0289516	cl_4	CESC
Interleukin-6 family signaling	STAT1	0.0289516	cl_4	CESC
Immune System	IRF8;IRF4;IRF8;IRF2;IRF1;STAT5A;PML;STAT4;STAT1;STAT2;STAT1;IRF4;IRF2;BATF;IRF1;PML;BATF	0.0382395	cl_4	CESC
NOTCH3 Intracellular Domain Regulates Transcription	IKZF1;STAT1	0.0385394	cl_4	CESC
Downstream signal transduction	STAT1;STAT5A	0.0406045	cl_4	CESC
FGFR1 mutant receptor activation	STAT1;STAT5A	0.0664134	cl_4	CESC
Signaling by FGFR1 in disease	STAT1;STAT5A	0.0708687	cl_4	CESC
Signaling by NOTCH3	IKZF1;STAT1	0.0825419	cl_4	CESC
RUNX1 regulates transcription of genes involved in differentiation of myeloid cells	RUNX1;RUNX2;CREBBP	0.00645152	cl_2	COAD_READ.
RUNX3 regulates RUNX1-mediated transcription	RUNX3;RUNX1	0.00645152	cl_2	COAD_READ.
RUNX2 regulates genes involved in differentiation of myeloid cells	RUNX1;RUNX2	0.0141996	cl_2	COAD_READ.
Transcriptional regulation by RUNX3	RUNX1;CTNNB1;RUNX3;LEF1;RUNX1;CREBBP;TEAD1	0.0314551	cl_2	COAD_READ.
Binding of TCF/LEF:CTNNB1 to target gene promoters	CTNNB1;RUNX3;LEF1	0.0314551	cl_2	COAD_READ.
RUNX3 regulates WNT signaling	CTNNB1;RUNX3;LEF1	0.0314551	cl_2	COAD_READ.
Regulation of TP53 Expression	PRDM1;PRDM1	0.0892836	cl_2	COAD_READ.
NOTCH3 Intracellular Domain Regulates Transcription	HEYL;STAT1;HEYL;CREBBP	0.0892836	cl_2	COAD_READ.
RUNX1 and FOXP3 control the development of regulatory T lymphocytes (Tregs)	RUNX1;FOXP3;FOXP3	0.0892836	cl_2	COAD_READ.
YAP1- and WWTR1 (TAZ)-stimulated gene expression	RUNX2;TEAD1	0.0892836	cl_2	COAD_READ.
Interleukin-6 signaling	STAT1;STAT3	0.0892836	cl_2	COAD_READ.
Regulation of beta-cell development	HNF1B;PDX1;HNF4A;HNF4A;HNF1B;NOTCH1;PDX1	0.000144268	cl_4	COAD_READ.
Transcriptional Regulation by E2F6	E2F1;CBX3;BRCA1;BRCA1;TFDP1;E2F1;E2F6	0.000796644	cl_4	COAD_READ.
Regulation of gene expression in beta cells	PDX1;HNF4A;HNF4A;PDX1	0.00143302	cl_4	COAD_READ.
Mitotic G1 phase and G1/S transition	E2F1;MYBL2;E2F4;SRC;MYC;RBL1;RB1;MYBL2;TFDP1;E2F1;RBL1;E2F6	0.00143302	cl_4	COAD_READ.
SMAD2/SMAD3:SMAD4 heterotrimer regulates transcription	E2F4;MYC;MYC;TFDP1;RBL1;CDK8	0.00189792	cl_4	COAD_READ.
TP53 Regulates Transcription of Cell Cycle Genes	E2F1;E2F4;ARID3A;ARID3A;TFDP1;E2F1;RBL1	0.00371374	cl_4	COAD_READ.
G1 Phase	E2F1;E2F4;SRC;RB1;TFDP1;RBL1	0.00622161	cl_4	COAD_READ.
Cyclin D associated events in G1	E2F1;E2F4;SRC;RB1;TFDP1;RBL1	0.00622161	cl_4	COAD_READ.
Transcriptional activity of SMAD2/SMAD3:SMAD4 heterotrimer	E2F4;MYC;MYC;TFDP1;RBL1;CDK8	0.00816153	cl_4	COAD_READ.
TP53 Regulates Transcription of Genes Involved in G1 Cell Cycle Arrest	E2F1;ARID3A;ARID3A;E2F1	0.00873261	cl_4	COAD_READ.
Binding of TCF/LEF:CTNNB1 to target gene promoters	MYC;TCF7;MYC	0.0141054	cl_4	COAD_READ.
RUNX3 regulates WNT signaling	MYC;TCF7;MYC	0.0141054	cl_4	COAD_READ.
Transcriptional regulation by RUNX3	CBFB;SRC;MYC;TCF7;TEAD4;MYC;NOTCH1;YAP1	0.0143785	cl_4	COAD_READ.
G1/S-Specific Transcription	E2F1;E2F4;TFDP1;RBL1;E2F6	0.0143785	cl_4	COAD_READ.
Regulation of gene expression in early pancreatic precursor cells	HNF1B;PDX1;PDX1	0.030784	cl_4	COAD_READ.
Inhibition of replication initiation of damaged DNA by RB1/E2F1	E2F1;RB1;TFDP1	0.0355535	cl_4	COAD_READ.
Repression of WNT target genes	TCF7;MYC	0.0409118	cl_4	COAD_READ.
RUNX2 regulates osteoblast differentiation	CBFB;SRC;RB1;YAP1	0.0409118	cl_4	COAD_READ.
Signaling by TGF-beta Receptor Complex	E2F4;MYC;MYC;TFDP1;RBL1;CDK8	0.0425816	cl_4	COAD_READ.
Defective binding of RB1 mutants to E2F1,(E2F2, E2F3)	E2F1;RB1;TFDP1	0.0425816	cl_4	COAD_READ.
Aberrant regulation of mitotic G1/S transition in cancer due to RB1 defects	E2F1;RB1;TFDP1	0.0425816	cl_4	COAD_READ.
Regulation of gene expression in late stage (branching morphogenesis) pancreatic bud precursor cells	HNF1B;HNF1B;NOTCH1	0.0627793	cl_4	COAD_READ.
Activation of NOXA and translocation to mitochondria	E2F1;TFDP1	0.0637951	cl_4	COAD_READ.
TP53 Regulates Transcription of Genes Involved in G2 Cell Cycle Arrest	E2F4;TFDP1;RBL1	0.0670485	cl_4	COAD_READ.
RUNX2 regulates bone development	CBFB;SRC;RB1;YAP1	0.0729018	cl_4	COAD_READ.
RUNX1 regulates transcription of genes involved in interleukin signaling	CBFB;ELF1	0.0744746	cl_4	COAD_READ.
RUNX1 regulates transcription of genes involved in BCR signaling	CBFB;ELF1	0.0744746	cl_4	COAD_READ.
E2F mediated regulation of DNA replication	E2F1;RB1;TFDP1	0.08286	cl_4	COAD_READ.
Transcriptional regulation of white adipocyte differentiation	CEBPA;MED12;CEBPB;CEBPB;CEBPA;CDK8	0.0971899	cl_4	COAD_READ.
FOXO-mediated transcription of cell cycle genes	RBL2;RBL2;FOXO1	0.00413495	cl_5	COAD_READ.
Signaling by TCF7L2 mutants	CTBP1;TCF7L2	0.0318127	cl_3	COAD_READ.
Loss of MECP2 binding ability to the NCoR/SMRT complex	NCOR2;NCOR1;MECP2	0.0611555	cl_2	GBM.
Transcriptional regulation of pluripotent stem cells	STAT3;SOX2;EPAS1;SOX2;SMAD4;STAT3;PBX1;EPAS1	0.0611555	cl_2	GBM.
Transcription of E2F targets under negative control by p107 (RBL1) and p130 (RBL2) in complex with HDAC1	E2F1;MYBL2;E2F4;MYBL2;E2F1;RBL1;LIN9	0.00208794	cl_1	GBM.
SUMOylation of transcription cofactors	CTBP1;SUMO2;TRIM28;RING1;PCGF2;UBE2I;DAXX;RNF2;CBX8	0.00230041	cl_1	GBM.
SUMOylation of DNA methylation proteins	DNMT3A;RING1;PCGF2;UBE2I;RNF2;CBX8	0.00230041	cl_1	GBM.
G0 and Early G1	E2F1;MYBL2;E2F4;RBL1;MYBL2;E2F1;RBL1;LIN9	0.00416374	cl_1	GBM.
Transcriptional Regulation by E2F6	E2F1;CBX3;RING1;PCGF2;E2F1;E2F6;EZH2;RNF2	0.0123905	cl_1	GBM.
Transcription of E2F targets under negative control by DREAM complex	E2F1;E2F4;RBL1;E2F1;RBL1;LIN9	0.0131252	cl_1	GBM.
Regulation of PTEN gene transcription	KDM1A;RING1;MBD3;TP53;HDAC3;HDAC2;EZH2;RNF2;CBX8	0.0311436	cl_1	GBM.
RUNX1 interacts with co-factors whose precise effect on RUNX1 targets is not known	CBFB;RING1;SMARCB1;SMARCA4;RNF2;CBX8	0.0983891	cl_1	GBM.
Transcriptional regulation of granulopoiesis	TAL1;CEBPA;CEBPA;FLI1	0.00153155	cl_4	GBM.
Interferon gamma signaling	IRF8;CIITA;IRF5;IRF8;IRF5;CIITA	0.0406901	cl_4	GBM.
Transcriptional regulation of white adipocyte differentiation	CEBPD;CEBPA;CEBPA;CEBPD	0.0448049	cl_4	GBM.
NOTCH3 Intracellular Domain Regulates Transcription	HEYL;IKZF1;STAT1;HEY1;NOTCH1;HEYL;HEY1	0.000344886	cl_1	HNSC
RUNX3 regulates RUNX1-mediated transcription	RUNX3;RUNX1	0.00417525	cl_1	HNSC
Signaling by NOTCH3	HEYL;IKZF1;STAT1;HEY1;NOTCH1;HEYL;HEY1	0.00417525	cl_1	HNSC
Interferon gamma signaling	IRF8;CIITA;IRF4;IRF8;IRF2;IRF1;CIITA;PML;STAT1;IRF4;IRF2;IRF1;PML	0.00577226	cl_1	HNSC
RUNX2 regulates genes involved in differentiation of myeloid cells	RUNX1;RUNX2	0.00577226	cl_1	HNSC
Interferon alpha/beta signaling	IRF8;STAT1;IRF4;IRF8;IRF2;STAT2;IRF1;IRF4;IRF2;IRF1	0.00577226	cl_1	HNSC
YAP1- and WWTR1 (TAZ)-stimulated gene expression	RUNX2;TEAD1;TEAD2	0.00650386	cl_1	HNSC
NOTCH1 Intracellular Domain Regulates Transcription	HEYL;HEY1;NCOR2;NOTCH1;HEYL;HEY1	0.00742752	cl_1	HNSC
Interferon Signaling	IRF8;CIITA;IRF4;IRF8;IRF2;IRF1;CIITA;PML;STAT1;STAT2;IRF4;IRF2;IRF1;PML	0.00816142	cl_1	HNSC
RUNX3 regulates YAP1-mediated transcription	RUNX3;TEAD1;TEAD2	0.00938826	cl_1	HNSC
Transcriptional regulation by RUNX3	RUNX1;RUNX3;TCF7;NOTCH1;RUNX1;TEAD1;TEAD2	0.00938826	cl_1	HNSC
Signaling by NOTCH1 in Cancer	HEYL;HEY1;NCOR2;NOTCH1;HEYL;HEY1	0.00941634	cl_1	HNSC
Constitutive Signaling by NOTCH1 HD+PEST Domain Mutants	HEYL;HEY1;NCOR2;NOTCH1;HEYL;HEY1	0.00941634	cl_1	HNSC
Signaling by NOTCH1 PEST Domain Mutants in Cancer	HEYL;HEY1;NCOR2;NOTCH1;HEYL;HEY1	0.00941634	cl_1	HNSC
Signaling by NOTCH1 HD+PEST Domain Mutants in Cancer	HEYL;HEY1;NCOR2;NOTCH1;HEYL;HEY1	0.00941634	cl_1	HNSC
Constitutive Signaling by NOTCH1 PEST Domain Mutants	HEYL;HEY1;NCOR2;NOTCH1;HEYL;HEY1	0.00941634	cl_1	HNSC
RUNX1 regulates transcription of genes involved in differentiation of myeloid cells	RUNX1;RUNX2	0.0105972	cl_1	HNSC
Interleukin-21 signaling	STAT4;STAT1;STAT5A	0.0128989	cl_1	HNSC
Interleukin-20 family signaling	STAT4;STAT1;STAT2;STAT5A	0.014344	cl_1	HNSC
Interleukin-4 and Interleukin-13 signaling	STAT1;IRF4;GATA3;STAT1;IRF4;FOXO1;BATF;FOXO1;BATF;GATA3	0.0186324	cl_1	HNSC
Signaling by NOTCH	RUNX1;HEYL;IKZF1;STAT1;HEY1;NCOR2;NOTCH1;HEYL;HEY1;NOTCH1	0.0193368	cl_1	HNSC
Signaling by NOTCH1	HEYL;HEY1;NCOR2;NOTCH1;HEYL;HEY1	0.0194442	cl_1	HNSC
RUNX1 and FOXP3 control the development of regulatory T lymphocytes (Tregs)	RUNX1;FOXP3;FOXP3	0.0270793	cl_1	HNSC
RUNX2 regulates chondrocyte maturation	RUNX2	0.0598492	cl_1	HNSC
Transcriptional regulation by RUNX2	RUNX1;RUNX2;SOX9;STAT1;HEY1;RUNX2	0.0701887	cl_1	HNSC
NOTCH4 Intracellular Domain Regulates Transcription	HEY1;NOTCH1;HEY1	0.0756534	cl_1	HNSC
RUNX1 regulates transcription of genes involved in WNT signaling	RUNX1;FOXP3	0.0819659	cl_1	HNSC
Regulation of IFNA signaling	STAT1;STAT2	0.0819659	cl_1	HNSC
Signaling by phosphorylated juxtamembrane, extracellular and kinase domain KIT mutants	STAT1;STAT5A	0.0819659	cl_1	HNSC
Cytokine Signaling in Immune system	IRF8;CIITA;IRF4;IRF8;IRF2;IRF1;STAT5A;MEF2C;CIITA;PML;STAT4;STAT1;GATA3;STAT2;STAT1;IRF4;FOXO1;IRF2;BATF;IRF1;FOXO1;PML;BATF;GATA3	0.0819659	cl_1	HNSC
Binding of TCF/LEF:CTNNB1 to target gene promoters	RUNX3;TCF7	0.0822366	cl_1	HNSC
RUNX3 regulates WNT signaling	RUNX3;TCF7	0.0822366	cl_1	HNSC
MECP2 regulates transcription factors	MEF2C;MEF2C	0.0822366	cl_1	HNSC
Regulation of RUNX1 Expression and Activity	RUNX1;RUNX1;PML	0.0994499	cl_1	HNSC
Transcription of E2F targets under negative control by p107 (RBL1) and p130 (RBL2) in complex with HDAC1	E2F1;MYBL2;E2F4;HDAC1;MYBL2;E2F1	0.000750543	cl_3	HNSC
G0 and Early G1	E2F1;MYBL2;E2F4;HDAC1;MYC;MYBL2;E2F1	0.00123244	cl_3	HNSC
SMAD2/SMAD3:SMAD4 heterotrimer regulates transcription	E2F4;HDAC1;MYC;TGIF1;MYC;CDK9	0.00758023	cl_3	HNSC
Transcription of E2F targets under negative control by DREAM complex	E2F1;E2F4;HDAC1;MYC;E2F1	0.00758023	cl_3	HNSC
Repression of WNT target genes	HDAC1;MYC;TCF7L1	0.0142756	cl_3	HNSC
Transcriptional regulation of granulopoiesis	E2F1;MYC;H2AFX;MYC;CEBPB;CEBPB	0.0171773	cl_3	HNSC
Transcriptional activity of SMAD2/SMAD3:SMAD4 heterotrimer	E2F4;HDAC1;MYC;TGIF1;MYC;CDK9	0.0217216	cl_3	HNSC
Binding of TCF/LEF:CTNNB1 to target gene promoters	MYC;MYC;TCF7L1	0.0305395	cl_3	HNSC
RUNX3 regulates WNT signaling	MYC;MYC;TCF7L1	0.0305395	cl_3	HNSC
Formation of the beta-catenin:TCF transactivating complex	HDAC1;MYC;H2AFX;MYC;TCF7L1;SMARCA4	0.0442979	cl_3	HNSC
Transcriptional Regulation by E2F6	E2F1;CBX3;RING1;E2F1;EZH2	0.0450956	cl_3	HNSC
Regulation of PTEN gene transcription	HDAC1;KDM1A;RING1;MBD3;HDAC2;EZH2	0.047754	cl_3	HNSC
ERCC6 (CSB) and EHMT2 (G9a) positively regulate rRNA expression	CBX3;HDAC1;H2AFX;MBD3;HDAC2	0.0478814	cl_3	HNSC
Positive epigenetic regulation of rRNA expression	CBX3;HDAC1;H2AFX;MBD3;TBP;HDAC2	0.0808281	cl_3	HNSC
ATF6 (ATF6-alpha) activates chaperone genes	DDIT3;DDIT3	0.000206286	cl_8	KICH
ATF6 (ATF6-alpha) activates chaperones	DDIT3;DDIT3	0.000206286	cl_8	KICH
Unfolded Protein Response (UPR)	DDIT3;CEBPG;DDIT3	0.000616922	cl_8	KICH
Cellular responses to stress	DDIT3;CEBPG;DDIT3	0.00283519	cl_8	KICH
Cellular responses to external stimuli	DDIT3;CEBPG;DDIT3	0.00283519	cl_8	KICH
FOXO-mediated transcription of cell death genes	DDIT3	0.0201218	cl_8	KICH
Nuclear Receptor transcription pathway	NR0B2	0.0733401	cl_8	KICH
FOXO-mediated transcription	DDIT3	0.0929021	cl_8	KICH
Interferon alpha/beta signaling	IRF8;IRF5;IRF4;IRF8;IRF3;IRF2;IRF1;STAT1;STAT2;IRF5;IRF4;IRF3;IRF2;IRF1	0.010599	cl_2	KIRC
RUNX3 regulates RUNX1-mediated transcription	RUNX3;RUNX1	0.0124338	cl_2	KIRC
Interferon gamma signaling	IRF8;CIITA;IRF5;IRF4;IRF8;IRF3;IRF2;IRF1;CIITA;PML;STAT1;IRF5;IRF4;IRF3;IRF2;IRF1;PML	0.0124338	cl_2	KIRC
RUNX2 regulates genes involved in differentiation of myeloid cells	RUNX1;RUNX2	0.0284226	cl_2	KIRC
ATF6 (ATF6-alpha) activates chaperone genes	DDIT3;NFYC;DDIT3;ATF4	0.0284226	cl_2	KIRC
PERK regulates gene expression	DDIT3;NFYC;CEBPB;ATF4;DDIT3;ATF4	0.0284226	cl_2	KIRC
ATF6 (ATF6-alpha) activates chaperones	DDIT3;NFYC;DDIT3;ATF4	0.0357862	cl_2	KIRC
ATF4 activates genes in response to endoplasmic reticulum stress	DDIT3;NFYC;CEBPB;DDIT3;ATF4	0.0518808	cl_2	KIRC
Interferon Signaling	IRF8;CIITA;IRF5;IRF4;IRF8;IRF3;IRF2;IRF1;CIITA;PML;STAT1;STAT2;IRF5;IRF4;IRF3;IRF2;IRF1;PML	0.0518808	cl_2	KIRC
RUNX1 regulates transcription of genes involved in differentiation of myeloid cells	RUNX1;RUNX2	0.0798986	cl_2	KIRC
Interleukin-21 signaling	STAT4;STAT1;STAT5A	0.0932359	cl_2	KIRC
FOXO-mediated transcription of cell cycle genes	RBL2;RBL2;SMAD4;SMAD2;FOXO3;KLF4;KLF4	0.0117855	cl_3	KIRC
Loss of MECP2 binding ability to the NCoR/SMRT complex	TBL1X;TBL1XR1;MECP2	0.012491	cl_3	KIRC
Disorders of Nervous System Development	TBL1X;TBL1XR1;SIN3A;MECP2	0.012491	cl_3	KIRC
Loss of function of MECP2 in Rett syndrome	TBL1X;TBL1XR1;SIN3A;MECP2	0.012491	cl_3	KIRC
Disorders of Developmental Biology	TBL1X;TBL1XR1;SIN3A;MECP2	0.012491	cl_3	KIRC
Pervasive developmental disorders	TBL1X;TBL1XR1;SIN3A;MECP2	0.012491	cl_3	KIRC
Regulation of MECP2 expression and activity	TBL1X;TBL1XR1;MECP2;SIN3A;MECP2	0.0161757	cl_3	KIRC
Loss of MECP2 binding ability to 5mC-DNA	SIN3A;MECP2	0.0329958	cl_3	KIRC
NOTCH3 Intracellular Domain Regulates Transcription	HEYL;HES1;HES1;HEY1;NOTCH1;HEYL;HEY1	0.00110055	cl_1	KIRC
NOTCH1 Intracellular Domain Regulates Transcription	HEYL;HES1;HES1;HEY1;NOTCH1;HEYL;HEY1;HIF1A	0.00117904	cl_1	KIRC
MECP2 regulates transcription factors	PPARG;MEF2C;MEF2C;PPARG	0.00314825	cl_1	KIRC
NOTCH4 Intracellular Domain Regulates Transcription	HES1;HES1;HEY1;NOTCH1;HEY1	0.00532429	cl_1	KIRC
Signaling by NOTCH1	HEYL;HES1;HES1;HEY1;NOTCH1;HEYL;HEY1;HIF1A	0.00532429	cl_1	KIRC
Signaling by NOTCH3	HEYL;HES1;HES1;HEY1;NOTCH1;HEYL;HEY1	0.00532429	cl_1	KIRC
Constitutive Signaling by NOTCH1 PEST Domain Mutants	HEYL;HES1;HES1;HEY1;NOTCH1;HEYL;HEY1	0.00532429	cl_1	KIRC
Signaling by NOTCH1 HD+PEST Domain Mutants in Cancer	HEYL;HES1;HES1;HEY1;NOTCH1;HEYL;HEY1	0.00532429	cl_1	KIRC
Signaling by NOTCH1 PEST Domain Mutants in Cancer	HEYL;HES1;HES1;HEY1;NOTCH1;HEYL;HEY1	0.00532429	cl_1	KIRC
Constitutive Signaling by NOTCH1 HD+PEST Domain Mutants	HEYL;HES1;HES1;HEY1;NOTCH1;HEYL;HEY1	0.00532429	cl_1	KIRC
Signaling by NOTCH1 in Cancer	HEYL;HES1;HES1;HEY1;NOTCH1;HEYL;HEY1	0.00532429	cl_1	KIRC
GLI proteins bind promoters of Hh responsive genes to promote transcription	GLI1;GLI2;GLI1	0.00996807	cl_1	KIRC
RUNX3 regulates WNT signaling	CTNNB1;TCF7L1;TCF7L2	0.016177	cl_1	KIRC
Binding of TCF/LEF:CTNNB1 to target gene promoters	CTNNB1;TCF7L1;TCF7L2	0.016177	cl_1	KIRC
Signaling by TCF7L2 mutants	CTBP2;TCF7L2	0.0260414	cl_1	KIRC
Regulation of TP53 Expression	PRDM1;PRDM1	0.0436031	cl_1	KIRC
Repression of WNT target genes	CTBP2;TCF7L1;TCF7L2	0.0481373	cl_1	KIRC
RUNX3 regulates NOTCH signaling	HES1;HES1;NOTCH1	0.0481373	cl_1	KIRC
Regulation of gene expression in late stage (branching morphogenesis) pancreatic bud precursor cells	HES1;HES1;NOTCH1	0.0845145	cl_1	KIRC
Oncogene Induced Senescence	ETS2;ERF;ETS1;ETS2	0.0953343	cl_1	KIRC
RUNX2 regulates bone development	HES1;HEY1;SMAD1;GLI2	0.0969274	cl_1	KIRC
Deactivation of the beta-catenin transactivating complex	CTNNB1;SOX17;TCF7L1;TCF7L2	0.0978978	cl_1	KIRC
Regulation of PTEN gene transcription	SNAI2;PPARG;MECOM;RCOR1;RNF2	0.0985193	cl_1	KIRC
Transcriptional Regulation by MECP2	PPARG;MEF2C;MEF2C;PPARG;NOTCH1	0.0985193	cl_1	KIRC
Circadian Clock	PPARGC1A;TBL1X;CLOCK;PPARA;ATF2;MED1;CREBBP;PPARGC1A;HIF1A;PPARA;CLOCK	0.0156078	cl_1	KIRP
Chromatin modifying enzymes	CLOCK;ASH2L;TRRAP;CHD4;ATF7IP;ATF2;KDM4C;REST;TBL1X;KDM1B;PHF20;AEBP2;CREBBP;SMARCA4;KAT2B;HCFC1	0.0502824	cl_1	KIRP
Chromatin organization	CLOCK;ASH2L;TRRAP;CHD4;ATF7IP;ATF2;KDM4C;REST;TBL1X;KDM1B;PHF20;AEBP2;CREBBP;SMARCA4;KAT2B;HCFC1	0.0502824	cl_1	KIRP
BMAL1:CLOCK,NPAS2 activates circadian gene expression	TBL1X;CLOCK;PPARA;MED1;CREBBP;PPARA	0.0502824	cl_1	KIRP
Loss of MECP2 binding ability to the NCoR/SMRT complex	TBL1X;MECP2	0.0621649	cl_1	KIRP
Loss of MECP2 binding ability to 5hmC-DNA	MECP2	0.0621649	cl_1	KIRP
Transcriptional activation of mitochondrial biogenesis	PPARGC1A;TBL1X;ATF2;MED1;CREBBP;PPARGC1A;PPARA;HCFC1	0.0621649	cl_1	KIRP
Loss of Function of SMAD4 in Cancer	SMAD3;SMAD4	0.0368833	cl_4	KIRP
SMAD4 MH2 Domain Mutants in Cancer	SMAD3;SMAD4	0.0368833	cl_4	KIRP
SMAD2/3 MH2 Domain Mutants in Cancer	SMAD3;SMAD4	0.0368833	cl_4	KIRP
RUNX3 regulates BCL2L11 (BIM) transcription	SMAD3;SMAD4	0.0847482	cl_4	KIRP
Downregulation of SMAD2/3:SMAD4 transcriptional activity	SMAD3;SMAD4;NCOR1	0.0847482	cl_4	KIRP
Loss of Function of SMAD2/3 in Cancer	SMAD3;SMAD4	0.0847482	cl_4	KIRP
Aryl hydrocarbon receptor signalling	AHR;ARNT2	0.0847482	cl_4	KIRP
RUNX3 regulates CDKN1A transcription	SMAD3;SMAD4	0.0847482	cl_4	KIRP
Signaling by TGF-beta Receptor Complex in Cancer	SMAD3;SMAD4	0.0928411	cl_4	KIRP
Transcriptional regulation of granulopoiesis	MYC;MYC;CEBPA;CEBPA;FLI1	0.000737062	cl_3	KIRP
RUNX3 regulates WNT signaling	RUNX3;MYC;MYC	0.00171911	cl_3	KIRP
Binding of TCF/LEF:CTNNB1 to target gene promoters	RUNX3;MYC;MYC	0.00171911	cl_3	KIRP
Regulation of gene expression in beta cells	HNF4A;HNF4A	0.00243045	cl_3	KIRP
BMAL1:CLOCK,NPAS2 activates circadian gene expression	BHLHE40;KLF15;BHLHE40;KLF15	0.00390716	cl_3	KIRP
Nuclear Receptor transcription pathway	NR1H3;VDR;HNF4A;ESR1	0.00456036	cl_3	KIRP
Regulation of beta-cell development	HNF4A;HNF4A	0.0143213	cl_3	KIRP
Response of EIF2AK1 (HRI) to heme deficiency	ATF5;ATF5	0.0143213	cl_3	KIRP
SUMOylation of intracellular receptors	NR1H3;VDR;ESR1	0.0322799	cl_3	KIRP
Signaling by Nuclear Receptors	NR1H3;MYC;MYC;NR1H3;ESR1	0.0326907	cl_3	KIRP
Interleukin-21 signaling	STAT4;STAT5A	0.0332349	cl_3	KIRP
Circadian Clock	BHLHE40;KLF15;BHLHE40;KLF15	0.0449379	cl_3	KIRP
Transcriptional regulation by the AP-2 (TFAP2) family of transcription factors	ESR1;MYC;ESR1	0.0449379	cl_3	KIRP
Repression of WNT target genes	MYC	0.0457183	cl_3	KIRP
TFAP2 (AP-2) family regulates transcription of growth factors and their receptors	ESR1;ESR1	0.0676721	cl_3	KIRP
NR1H3 & NR1H2 regulate gene expression linked to cholesterol transport and efflux	NR1H3;NR1H3	0.0676721	cl_3	KIRP
Formation of the beta-catenin:TCF transactivating complex	RUNX3;MYC;MYC	0.0676721	cl_3	KIRP
Transcriptional Regulation by E2F6	CBX3;BRCA1;MAX;EED;BRCA1;RYBP;PCGF6;BMI1;E2F6;EZH2;RNF2	0.00454992	cl_2	LAML
RUNX1 regulates transcription of genes involved in BCR signaling	RUNX1;CBFB;ELF2;ELF1	0.0707586	cl_2	LAML
RUNX1 interacts with co-factors whose precise effect on RUNX1 targets is not known	RUNX1;CBFB;CSNK2A1;RYBP;SMARCC1;BMI1;ARID2;RNF2	0.0707586	cl_2	LAML
Circadian Clock	TBL1X;RORA;ARNTL;RORA;MEF2C;RXRA;HDAC3;CREBBP;HIF1A;MEF2D;ARNTL	0.000346665	cl_1	LAML
Transcriptional regulation of white adipocyte differentiation	TBL1X;CEBPD;NCOR2;RXRA;HDAC3;EGR2;CREBBP;CEBPB;KLF4;CEBPB;CEBPD	0.000346665	cl_1	LAML
Signaling by Interleukins	JUNB;MEF2C;MEF2A;JUNB;FOS;FOS;CEBPD;IRF4;FOXO1;HIF1A;FOXO1;HIF1A;IRF4;CEBPD;BCL6;STAT6;RORA;GATA3;BCL6;STAT2;SMAD3;RORA;BATF;BATF;GATA3	0.00882542	cl_1	LAML
Notch-HLH transcription pathway	TBL1X;NCOR2;HDAC3;CREBBP;KAT2B	0.00882542	cl_1	LAML
Transcriptional regulation of granulopoiesis	RARA;TAL1;LEF1;RXRA;CEBPB;CEBPB	0.0133292	cl_1	LAML
Loss of MECP2 binding ability to the NCoR/SMRT complex	TBL1X;NCOR2;HDAC3	0.0168803	cl_1	LAML
NOTCH1 Intracellular Domain Regulates Transcription	TBL1X;NCOR2;HDAC3;CREBBP;HIF1A;KAT2B	0.0168803	cl_1	LAML
Nuclear Events (kinase and transcription factor activation)	FOS;MEF2C;MEF2A;EGR2;JUNB;EGR2;MEF2D	0.0168803	cl_1	LAML
FOXO-mediated transcription	BCL6;BCL6;SMAD3;FOXO1;CREBBP;KLF4;KLF4;KAT2B	0.0168803	cl_1	LAML
SUMOylation of intracellular receptors	RARA;RORA;VDR;RXRA;PIAS4	0.0168803	cl_1	LAML
FOXO-mediated transcription of cell death genes	BCL6;BCL6;FOXO1;CREBBP	0.0168803	cl_1	LAML
Binding of TCF/LEF:CTNNB1 to target gene promoters	TCF7;LEF1;TCF7L2	0.0168803	cl_1	LAML
RUNX3 regulates WNT signaling	TCF7;LEF1;TCF7L2	0.0168803	cl_1	LAML
RORA activates gene expression	TBL1X;RORA;RXRA;CREBBP	0.0205529	cl_1	LAML
FOXO-mediated transcription of cell cycle genes	SMAD3;FOXO1;KLF4;KLF4	0.025999	cl_1	LAML
Regulation of TP53 Expression	PRDM1;PRDM1	0.0374401	cl_1	LAML
Repression of WNT target genes	TCF7;LEF1;TCF7L2	0.0374401	cl_1	LAML
Regulation of FOXO transcriptional activity by acetylation	FOXO1;CREBBP;KAT2B	0.0374401	cl_1	LAML
Loss of function of MECP2 in Rett syndrome	TBL1X;NCOR2;HDAC3	0.0374401	cl_1	LAML
Disorders of Developmental Biology	TBL1X;NCOR2;HDAC3	0.0374401	cl_1	LAML
Pervasive developmental disorders	TBL1X;NCOR2;HDAC3	0.0374401	cl_1	LAML
Disorders of Nervous System Development	TBL1X;NCOR2;HDAC3	0.0374401	cl_1	LAML
NGF-stimulated transcription	FOS;EGR2;JUNB;EGR2;MEF2D	0.0397289	cl_1	LAML
Signaling by NOTCH1	TBL1X;NCOR2;HDAC3;CREBBP;HIF1A;KAT2B	0.0431514	cl_1	LAML
Transcriptional activation of mitochondrial biogenesis	TBL1X;MEF2C;RXRA;HDAC3;CREBBP;MEF2D	0.0499678	cl_1	LAML
Cytokine Signaling in Immune system	JUNB;MEF2C;MEF2A;JUNB;FOS;FOS;CEBPD;IRF5;IRF4;FOXO1;IRF2;HIF1A;FOXO1;IRF8;HIF1A;IRF5;IRF4;IRF8;IRF2;CEBPD;BCL6;STAT6;RORA;GATA3;BCL6;STAT2;SMAD3;RORA;BATF;BATF;GATA3	0.0499678	cl_1	LAML
NR1H3 & NR1H2 regulate gene expression linked to cholesterol transport and efflux	TBL1X;KDM1B;NCOR2;RXRA;HDAC3	0.0573481	cl_1	LAML
Interferon alpha/beta signaling	IRF8;IRF5;IRF4;IRF8;IRF2;STAT2;IRF5;IRF4;IRF2	0.0573481	cl_1	LAML
BMAL1:CLOCK,NPAS2 activates circadian gene expression	TBL1X;RXRA;CREBBP;ARNTL	0.0573481	cl_1	LAML
Constitutive Signaling by NOTCH1 PEST Domain Mutants	TBL1X;NCOR2;HDAC3;CREBBP;KAT2B	0.0573481	cl_1	LAML
Constitutive Signaling by NOTCH1 HD+PEST Domain Mutants	TBL1X;NCOR2;HDAC3;CREBBP;KAT2B	0.0573481	cl_1	LAML
Signaling by NOTCH1 HD+PEST Domain Mutants in Cancer	TBL1X;NCOR2;HDAC3;CREBBP;KAT2B	0.0573481	cl_1	LAML
Signaling by NOTCH1 PEST Domain Mutants in Cancer	TBL1X;NCOR2;HDAC3;CREBBP;KAT2B	0.0573481	cl_1	LAML
Signaling by NOTCH1 in Cancer	TBL1X;NCOR2;HDAC3;CREBBP;KAT2B	0.0573481	cl_1	LAML
NOTCH4 Intracellular Domain Regulates Transcription	SMAD3;CREBBP;KAT2B	0.0873065	cl_1	LAML
PPARA activates gene expression	TBL1X;AHR;RORA;NCOR2;RXRA;HDAC3;CREBBP;ARNTL	0.0873065	cl_1	LAML
Regulation of lipid metabolism by PPARalpha	TBL1X;AHR;RORA;NCOR2;RXRA;HDAC3;CREBBP;ARNTL	0.0873065	cl_1	LAML
Signaling by NTRK1 (TRKA)	FOS;MEF2C;MEF2A;EGR2;JUNB;EGR2;MEF2D	0.0929891	cl_1	LAML
Transcription of E2F targets under negative control by p107 (RBL1) and p130 (RBL2) in complex with HDAC1	E2F1;MYBL2;E2F4;HDAC1;MYBL2;E2F1	0.0140256	cl_3	LAML
G0 and Early G1	E2F1;MYBL2;E2F4;HDAC1;MYC;MYBL2;E2F1	0.0242283	cl_3	LAML
Chromatin modifying enzymes	HDAC1;TRRAP;H2AFX;EHMT2;SETDB1;CCDC101;KDM4A;KDM6B;BRD1;KDM5C;WDR5;GPS2;KDM2B;DOT1L;SMARCC2;PHF8;SMARCA4;RELA;HCFC1	0.0242283	cl_3	LAML
Chromatin organization	HDAC1;TRRAP;H2AFX;EHMT2;SETDB1;CCDC101;KDM4A;KDM6B;BRD1;KDM5C;WDR5;GPS2;KDM2B;DOT1L;SMARCC2;PHF8;SMARCA4;RELA;HCFC1	0.0242283	cl_3	LAML
Transcriptional regulation of granulopoiesis	E2F1;MYC;H2AFX;MYC;CEBPA;GATA2;CEBPA;PML	0.0242283	cl_3	LAML
Transcription of E2F targets under negative control by DREAM complex	E2F1;E2F4;HDAC1;MYC;E2F1	0.0679462	cl_3	LAML
ATF6 (ATF6-alpha) activates chaperone genes	NFYC;XBP1;ATF4;XBP1	0.0688669	cl_3	LAML
Repression of WNT target genes	CTBP1;HDAC1;MYC	0.0759766	cl_3	LAML
ATF6 (ATF6-alpha) activates chaperones	NFYC;XBP1;ATF4;XBP1	0.0838284	cl_3	LAML
SUMOylation of transcription cofactors	CTBP1;CBX4;SUMO2;RING1;PCGF2;NCOR2;PIAS4;DAXX;CBX8	0.00625712	cl_1	LGG
Chromatin modifying enzymes	KAT5;H2AFX;SETDB1;CCDC101;KDM4A;NCOR2;KDM6B;BRD1;EZH2;WDR5;GPS2;KDM2B;KDM1A;MBD3;SMARCB1;HDAC2;HDAC8;SMARCA4;JMJD6;RELA;HCFC1	0.0113876	cl_1	LGG
Chromatin organization	KAT5;H2AFX;SETDB1;CCDC101;KDM4A;NCOR2;KDM6B;BRD1;EZH2;WDR5;GPS2;KDM2B;KDM1A;MBD3;SMARCB1;HDAC2;HDAC8;SMARCA4;JMJD6;RELA;HCFC1	0.0113876	cl_1	LGG
NOTCH1 Intracellular Domain Regulates Transcription	MYC;HEY1;MYC;NCOR2;HEY1;HDAC2;HDAC8;TLE3;HDAC6	0.0113876	cl_1	LGG
Repression of WNT target genes	CTBP1;MYC;TCF7L1;TLE3	0.0172101	cl_1	LGG
Estrogen-dependent gene expression	RAC3;KAT5;MYC;H2AFX;JUND;TBP;KDM1A;MYC;USF1;USF2;GTF2F1;TLE3;CDK9	0.0532552	cl_1	LGG
Signaling by NOTCH1	MYC;HEY1;MYC;NCOR2;HEY1;HDAC2;HDAC8;TLE3;HDAC6	0.0532552	cl_1	LGG
Signaling by NOTCH1 PEST Domain Mutants in Cancer	MYC;HEY1;MYC;NCOR2;HEY1;HDAC2;HDAC8;HDAC6	0.0532552	cl_1	LGG
Signaling by NOTCH1 HD+PEST Domain Mutants in Cancer	MYC;HEY1;MYC;NCOR2;HEY1;HDAC2;HDAC8;HDAC6	0.0532552	cl_1	LGG
Constitutive Signaling by NOTCH1 HD+PEST Domain Mutants	MYC;HEY1;MYC;NCOR2;HEY1;HDAC2;HDAC8;HDAC6	0.0532552	cl_1	LGG
Constitutive Signaling by NOTCH1 PEST Domain Mutants	MYC;HEY1;MYC;NCOR2;HEY1;HDAC2;HDAC8;HDAC6	0.0532552	cl_1	LGG
Signaling by NOTCH1 in Cancer	MYC;HEY1;MYC;NCOR2;HEY1;HDAC2;HDAC8;HDAC6	0.0532552	cl_1	LGG
Regulation of PTEN gene transcription	CBX4;KDM1A;RING1;MBD3;TP53;HDAC2;EZH2;CBX8	0.0532552	cl_1	LGG
SUMOylation of DNA methylation proteins	CBX4;RING1;PCGF2;CBX8	0.0532552	cl_1	LGG
Defective Inhibition of DNA Recombination at Telomere Due to DAXX Mutations	ATRX;DAXX	0.0532552	cl_1	LGG
Defective Inhibition of DNA Recombination at Telomere Due to ATRX Mutations	ATRX;DAXX	0.0532552	cl_1	LGG
Alternative Lengthening of Telomeres (ALT)	ATRX;DAXX	0.0532552	cl_1	LGG
Defective Inhibition of DNA Recombination at Telomere	ATRX;DAXX	0.0532552	cl_1	LGG
Diseases of Telomere Maintenance	ATRX;DAXX	0.0532552	cl_1	LGG
HDMs demethylate histones	KDM2B;KDM1A;KDM4A;KDM6B;JMJD6	0.079031	cl_1	LGG
Binding of TCF/LEF:CTNNB1 to target gene promoters	MYC;MYC;TCF7L1	0.0968722	cl_1	LGG
RUNX3 regulates WNT signaling	MYC;MYC;TCF7L1	0.0968722	cl_1	LGG
Nuclear Events (kinase and transcription factor activation)	ID3;FOS;LYL1;MEF2C;ID3;MEF2A;MEF2D	0.00103488	cl_2	LGG
NGF-stimulated transcription	ID3;FOS;LYL1;ID3;MEF2D	0.00494904	cl_2	LGG
MAPK targets/ Nuclear events mediated by MAP kinases	FOS;MEF2C;JUN;MEF2A	0.00494904	cl_2	LGG
Signaling by NTRK1 (TRKA)	ID3;FOS;LYL1;MEF2C;ID3;MEF2A;MEF2D	0.00535824	cl_2	LGG
Transcriptional regulation of granulopoiesis	TAL1;CEBPA;CEBPA;FLI1	0.00699652	cl_2	LGG
Signaling by NTRKs	ID3;FOS;LYL1;MEF2C;ID3;MEF2A;MEF2D	0.0109744	cl_2	LGG
Transcriptional activation of mitochondrial biogenesis	PPARGC1A;NR1D1;MEF2C;PPARGC1A;MEF2D	0.0145605	cl_2	LGG
Myogenesis	MEF2C;MEF2A;MEF2D	0.0223717	cl_2	LGG
FOXO-mediated transcription	BCL6;BCL6;SREBF1;SREBF1;PPARGC1A	0.0223717	cl_2	LGG
MAP kinase activation	FOS;MEF2C;JUN;MEF2A	0.0223717	cl_2	LGG
MECP2 regulates transcription factors	MEF2C;MEF2C	0.0223717	cl_2	LGG
Activation of the AP-1 family of transcription factors	FOS;JUN	0.0223717	cl_2	LGG
Interleukin-17 signaling	FOS;MEF2C;JUN;MEF2A	0.0230244	cl_2	LGG
Mitochondrial biogenesis	PPARGC1A;NR1D1;MEF2C;PPARGC1A;MEF2D	0.02629	cl_2	LGG
FOXO-mediated transcription of oxidative stress, metabolic and neuronal genes	SREBF1;SREBF1;PPARGC1A	0.0426864	cl_2	LGG
NR1H2 & NR1H3 regulate gene expression linked to lipogenesis	SREBF1;SREBF1	0.0427891	cl_2	LGG
MyD88 cascade initiated on plasma membrane	FOS;MEF2C;JUN;MEF2A	0.0427891	cl_2	LGG
Toll Like Receptor 10 (TLR10) Cascade	FOS;MEF2C;JUN;MEF2A	0.0427891	cl_2	LGG
Toll Like Receptor 5 (TLR5) Cascade	FOS;MEF2C;JUN;MEF2A	0.0427891	cl_2	LGG
TRAF6 mediated induction of NFkB and MAP kinases upon TLR7/8 or 9 activation	FOS;MEF2C;JUN;MEF2A	0.0427891	cl_2	LGG
Toll Like Receptor 3 (TLR3) Cascade	FOS;MEF2C;JUN;MEF2A	0.0427891	cl_2	LGG
MyD88 dependent cascade initiated on endosome	FOS;MEF2C;JUN;MEF2A	0.0427891	cl_2	LGG
Toll Like Receptor 7/8 (TLR7/8) Cascade	FOS;MEF2C;JUN;MEF2A	0.0427891	cl_2	LGG
Transcriptional regulation of testis differentiation	SOX9;SOX9	0.0427891	cl_2	LGG
TRIF(TICAM1)-mediated TLR4 signaling	FOS;MEF2C;JUN;MEF2A	0.0427891	cl_2	LGG
MyD88-independent TLR4 cascade	FOS;MEF2C;JUN;MEF2A	0.0427891	cl_2	LGG
Toll Like Receptor 9 (TLR9) Cascade	FOS;MEF2C;JUN;MEF2A	0.0427891	cl_2	LGG
Transcriptional regulation of white adipocyte differentiation	CEBPA;SREBF1;PPARGC1A;CEBPA	0.0427891	cl_2	LGG
FOXO-mediated transcription of cell death genes	BCL6;BCL6	0.0427891	cl_2	LGG
MyD88:MAL(TIRAP) cascade initiated on plasma membrane	FOS;MEF2C;JUN;MEF2A	0.0427891	cl_2	LGG
Toll Like Receptor TLR6:TLR2 Cascade	FOS;MEF2C;JUN;MEF2A	0.0427891	cl_2	LGG
Toll Like Receptor TLR1:TLR2 Cascade	FOS;MEF2C;JUN;MEF2A	0.0427891	cl_2	LGG
Toll Like Receptor 2 (TLR2) Cascade	FOS;MEF2C;JUN;MEF2A	0.0427891	cl_2	LGG
RORA activates gene expression	SREBF1;SREBF1	0.0449396	cl_2	LGG
PPARA activates gene expression	CLOCK;NR1D1;SREBF1;PPARGC1A	0.0453306	cl_2	LGG
Regulation of lipid metabolism by PPARalpha	CLOCK;NR1D1;SREBF1;PPARGC1A	0.0473179	cl_2	LGG
ERK/MAPK targets	MEF2C;MEF2A	0.0483201	cl_2	LGG
TP53 regulates transcription of several additional cell death genes whose specific roles in p53-dependent apoptosis remain uncertain	BCL6;BCL6	0.0553818	cl_2	LGG
Estrogen-dependent nuclear events downstream of ESR-membrane signaling	FOS;FOS	0.0590588	cl_2	LGG
Toll Like Receptor 4 (TLR4) Cascade	FOS;MEF2C;JUN;MEF2A	0.0886575	cl_2	LGG
NR1D1 (REV-ERBA) represses gene expression	NR1D1	0.0896499	cl_2	LGG
Nuclear Receptor transcription pathway	NR2F1;HNF4A;AR;NR5A2;ESR1;PPARA	0.000102943	cl_1	LIHC
Regulation of gene expression in beta cells	HNF4A;HNF4A;FOXA2	0.000969434	cl_1	LIHC
SUMOylation of intracellular receptors	AR;NR5A2;ESR1;PPARA	0.0198954	cl_1	LIHC
Response of EIF2AK1 (HRI) to heme deficiency	DDIT3;CEBPG;ATF4;DDIT3;ATF4	0.000145206	cl_2	LIHC
TP53 Regulates Transcription of Genes Involved in G1 Cell Cycle Arrest	E2F1;ARID3A;ARID3A;E2F1;E2F8	0.000252985	cl_2	LIHC
Transcription of E2F targets under negative control by p107 (RBL1) and p130 (RBL2) in complex with HDAC1	E2F1;MYBL2;MYBL2;E2F1	0.00421798	cl_2	LIHC
PERK regulates gene expression	DDIT3;CEBPG;ATF4;DDIT3;ATF4	0.00430641	cl_2	LIHC
Unfolded Protein Response (UPR)	LMNA;CREB3L4;DDIT3;CEBPG;LMNA;ATF4;DDIT3;ATF4	0.00948662	cl_2	LIHC
ATF4 activates genes in response to endoplasmic reticulum stress	DDIT3;CEBPG;DDIT3;ATF4	0.0139875	cl_2	LIHC
ATF6 (ATF6-alpha) activates chaperone genes	DDIT3;DDIT3;ATF4	0.0139875	cl_2	LIHC
TP53 Regulates Transcription of Cell Cycle Genes	E2F1;ARID3A;ARID3A;E2F1;E2F8	0.0139875	cl_2	LIHC
SUMOylation of DNA methylation proteins	CBX4;RING1;CBX8	0.0139875	cl_2	LIHC
G0 and Early G1	E2F1;MYBL2;MYBL2;E2F1	0.0139875	cl_2	LIHC
ATF6 (ATF6-alpha) activates chaperones	DDIT3;DDIT3;ATF4	0.0139875	cl_2	LIHC
Regulation of PTEN gene transcription	PPARG;CBX4;RING1;MBD3;CBX8	0.0146603	cl_2	LIHC
Response of EIF2AK4 (GCN2) to amino acid deficiency	DDIT3;CEBPG;ATF4;DDIT3;ATF4	0.0200273	cl_2	LIHC
TFAP2A acts as a transcriptional repressor during retinoic acid induced cell differentiation	MYBL2;MYBL2	0.0565032	cl_2	LIHC
MECP2 regulates transcription factors	PPARG;PPARG	0.0643392	cl_2	LIHC
RUNX1 interacts with co-factors whose precise effect on RUNX1 targets is not known	CBX4;RING1;CBX8	0.0954801	cl_2	LIHC
NOTCH3 Intracellular Domain Regulates Transcription	HEYL;STAT1;HEYL	0.000452308	cl_3	LIHC
Interferon gamma signaling	IRF8;STAT1;IRF8;IRF1;IRF1	0.000682285	cl_3	LIHC
Signaling by NOTCH3	HEYL;STAT1;HEYL	0.00151194	cl_3	LIHC
Interleukin-21 signaling	STAT4;STAT1	0.00157497	cl_3	LIHC
Interleukin-35 Signalling	STAT4;STAT1	0.00229077	cl_3	LIHC
Interleukin-6 signaling	STAT1	0.00229077	cl_3	LIHC
Interleukin-4 and Interleukin-13 signaling	STAT1;STAT1;BATF;BATF	0.00229077	cl_3	LIHC
Signaling by Interleukins	STAT4;STAT1;STAT1;BATF;BATF	0.00309456	cl_3	LIHC
Signaling by phosphorylated juxtamembrane, extracellular and kinase domain KIT mutants	STAT1	0.00386443	cl_3	LIHC
Regulation of IFNA signaling	STAT1	0.00386443	cl_3	LIHC
Interleukin-20 family signaling	STAT4;STAT1	0.00386443	cl_3	LIHC
Interleukin-6 family signaling	STAT1	0.00386443	cl_3	LIHC
Signaling by KIT in disease	STAT1	0.00734322	cl_3	LIHC
Immune System	IRF8;STAT4;STAT1;IRF8;IRF1;STAT1;BATF;IRF1;BATF	0.00859811	cl_3	LIHC
Interleukin-2 family signaling	STAT4;STAT1	0.010639	cl_3	LIHC
NOTCH1 Intracellular Domain Regulates Transcription	HEYL;HEYL	0.0112613	cl_3	LIHC
Signaling by SCF-KIT	STAT1	0.0112613	cl_3	LIHC
Signaling by NOTCH1 PEST Domain Mutants in Cancer	HEYL;HEYL	0.0115487	cl_3	LIHC
Constitutive Signaling by NOTCH1 HD+PEST Domain Mutants	HEYL;HEYL	0.0115487	cl_3	LIHC
Signaling by NOTCH1 HD+PEST Domain Mutants in Cancer	HEYL;HEYL	0.0115487	cl_3	LIHC
Constitutive Signaling by NOTCH1 PEST Domain Mutants	HEYL;HEYL	0.0115487	cl_3	LIHC
Signaling by NOTCH1 in Cancer	HEYL;HEYL	0.0115487	cl_3	LIHC
Signaling by NOTCH1	HEYL;HEYL	0.0115487	cl_3	LIHC
Signaling by NOTCH	HEYL;STAT1;HEYL	0.0115487	cl_3	LIHC
Diseases of signal transduction by growth factor receptors and second messengers	HEYL;STAT1;HEYL	0.0115487	cl_3	LIHC
Interleukin-12 family signaling	STAT4;STAT1	0.0115487	cl_3	LIHC
Interleukin-23 signaling	STAT4	0.0185142	cl_3	LIHC
Interleukin-27 signaling	STAT1	0.0218449	cl_3	LIHC
Regulation of IFNG signaling	STAT1	0.0268206	cl_3	LIHC
Interleukin-9 signaling	STAT1	0.0268206	cl_3	LIHC
Signaling by PDGFRA transmembrane, juxtamembrane and kinase domain mutants	STAT1	0.031772	cl_3	LIHC
Signaling by PDGFRA extracellular domain mutants	STAT1	0.031772	cl_3	LIHC
Signaling by cytosolic FGFR1 fusion mutants	STAT1	0.0432313	cl_3	LIHC
Growth hormone receptor signaling	STAT1	0.0481025	cl_3	LIHC
Downstream signal transduction	STAT1	0.0609762	cl_3	LIHC
Signaling by PDGFR in disease	STAT1	0.0689373	cl_3	LIHC
FGFR1 mutant receptor activation	STAT1	0.078405	cl_3	LIHC
Signaling by FGFR1 in disease	STAT1	0.0939795	cl_3	LIHC
Interferon alpha/beta signaling	IRF8;IRF5;STAT1;IRF4;IRF8;IRF1;IRF5;IRF4;IRF1	0.0432946	cl_3	LUAD
Interferon gamma signaling	PML;IRF8;IRF5;STAT1;IRF4;IRF8;IRF1;IRF5;IRF4;IRF1;PML	0.0451194	cl_3	LUAD
Interleukin-21 signaling	STAT4;STAT1;STAT5A	0.0451194	cl_3	LUAD
NOTCH3 Intracellular Domain Regulates Transcription	IKZF1;STAT1;NOTCH1;KAT2B	0.0742997	cl_3	LUAD
YAP1- and WWTR1 (TAZ)-stimulated gene expression	RUNX2;KAT2B	0.0742997	cl_3	LUAD
Interferon Signaling	PML;IRF8;IRF5;STAT1;IRF4;IRF8;IRF1;IRF5;IRF4;IRF1;PML	0.0742997	cl_3	LUAD
RUNX2 regulates genes involved in differentiation of myeloid cells	RUNX2	0.098515	cl_3	LUAD
Activation of HOX genes during differentiation	MAFB;MEIS1;HOXB4;EGR2;HOXB4	0.098515	cl_3	LUAD
Activation of anterior HOX genes in hindbrain development during early embryogenesis	MAFB;MEIS1;HOXB4;EGR2;HOXB4	0.098515	cl_3	LUAD
RUNX2 regulates chondrocyte maturation	RUNX2	0.098515	cl_3	LUAD
Loss of MECP2 binding ability to 5mC-DNA	SIN3A;MECP2	0.0527618	cl_2	LUAD
Loss of MECP2 binding ability to 5hmC-DNA	MECP2	0.0984551	cl_2	LUAD
Regulation of MECP2 expression and activity	MECP2;SIN3A;MECP2	0.0984551	cl_2	LUAD
Cohesin Loading onto Chromatin	NIPBL;SMC3;SMC1A	0.0984551	cl_2	LUAD
TP53 Regulates Transcription of DNA Repair Genes	SSRP1;BRCA1;CDK12;FANCD2;BRCA1;FANCD2	0.00663533	cl_1	LUAD
Transcriptional Regulation by E2F6	E2F1;CBX3;BRCA1;BRCA1;E2F1;EZH2	0.00663533	cl_1	LUAD
Transcription of E2F targets under negative control by p107 (RBL1) and p130 (RBL2) in complex with HDAC1	E2F1;MYBL2;MYBL2;E2F1	0.0189014	cl_1	LUAD
SUMOylation of DNA methylation proteins	CBX4;DNMT3A;RING1;CBX8	0.0239899	cl_4	LUAD
RUNX3 regulates RUNX1-mediated transcription	RUNX1	0.00296945	cl_5	LUAD
Regulation of RUNX1 Expression and Activity	RUNX1;RUNX1	0.0538041	cl_5	LUAD
Transcriptional regulation by RUNX3	RUNX1;RUNX1	0.0538041	cl_5	LUAD
RUNX1 interacts with co-factors whose precise effect on RUNX1 targets is not known	RUNX1;SMARCA4	0.0538041	cl_5	LUAD
SUMOylation of intracellular receptors	RARA;VDR	0.0538041	cl_5	LUAD
Transcriptional regulation of granulopoiesis	RUNX1;RARA	0.0956591	cl_5	LUAD
RUNX2 regulates genes involved in differentiation of myeloid cells	RUNX1	0.0956591	cl_5	LUAD
RUNX1 regulates transcription of genes involved in BCR signaling	RUNX1	0.0956591	cl_5	LUAD
RUNX1 regulates transcription of genes involved in interleukin signaling	RUNX1	0.0956591	cl_5	LUAD
Nuclear Receptor transcription pathway	RARA;VDR	0.0956591	cl_5	LUAD
RUNX1 regulates expression of components of tight junctions	RUNX1	0.0956591	cl_5	LUAD
RUNX1 regulates transcription of genes involved in WNT signaling	RUNX1	0.0956591	cl_5	LUAD
RUNX1 regulates estrogen receptor mediated transcription	RUNX1	0.0956591	cl_5	LUAD
Transcriptional regulation by RUNX1	RUNX1;RUNX1;SMARCA4	0.0956591	cl_5	LUAD
Interferon gamma signaling	PML;IRF8;CIITA;STAT1;IRF4;IRF8;IRF1;IRF4;CIITA;IRF1;PML	0.000284534	cl_1	LUSC
Interferon Signaling	PML;IRF8;CIITA;STAT1;IRF4;IRF8;IRF1;IRF4;CIITA;IRF1;PML	0.000366469	cl_1	LUSC
Interferon alpha/beta signaling	IRF8;STAT1;IRF4;IRF8;IRF1;IRF4;IRF1	0.00293179	cl_1	LUSC
Nuclear Receptor transcription pathway	NR2F1;NR1H3;NR4A1;NR2C2	0.0121423	cl_1	LUSC
Cytokine Signaling in Immune system	IRF8;CIITA;IRF4;IRF8;IRF1;CIITA;PML;STAT4;STAT1;STAT1;IRF4;BATF;IRF1;PML;BATF	0.0520902	cl_1	LUSC
Interleukin-21 signaling	STAT4;STAT1	0.0686245	cl_1	LUSC
Interleukin-4 and Interleukin-13 signaling	STAT1;IRF4;STAT1;IRF4;BATF;BATF	0.0740163	cl_1	LUSC
ATF6 (ATF6-alpha) activates chaperone genes	XBP1;XBP1	0.0740163	cl_1	LUSC
Interleukin-35 Signalling	STAT4;STAT1	0.0740163	cl_1	LUSC
RUNX1 and FOXP3 control the development of regulatory T lymphocytes (Tregs)	FOXP3;FOXP3	0.0740163	cl_1	LUSC
ATF6 (ATF6-alpha) activates chaperones	XBP1;XBP1	0.0740163	cl_1	LUSC
Interleukin-6 signaling	STAT1	0.0750888	cl_1	LUSC
RUNX2 regulates genes involved in differentiation of myeloid cells	RUNX2	0.0808617	cl_2	LUSC
RUNX2 regulates chondrocyte maturation	RUNX2	0.0808617	cl_2	LUSC
TP53 Regulates Transcription of DNA Repair Genes	BRCA1;FANCD2;BRCA1;FANCD2;CDK9	0.0011191	cl_3	LUSC
Transcriptional Regulation by E2F6	E2F1;BRCA1;BRCA1;E2F1;EZH2	0.00289582	cl_3	LUSC
Response of EIF2AK1 (HRI) to heme deficiency	ATF5;ATF5	0.00215483	cl_3	MESO
RUNX2 regulates genes involved in differentiation of myeloid cells	RUNX1;RUNX2	0.000118204	cl_6	MESO
RUNX1 regulates transcription of genes involved in differentiation of myeloid cells	RUNX1;RUNX2	0.000473261	cl_6	MESO
RUNX2 regulates chondrocyte maturation	RUNX2	0.00964914	cl_6	MESO
Transcriptional regulation by RUNX3	RUNX1;RUNX3;RUNX1	0.0246989	cl_6	MESO
RUNX2 regulates genes involved in cell migration	RUNX2	0.0246989	cl_6	MESO
RUNX3 regulates p14-ARF	RUNX1;RUNX3	0.0278076	cl_6	MESO
YAP1- and WWTR1 (TAZ)-stimulated gene expression	RUNX2	0.0296189	cl_6	MESO
Transcriptional regulation by RUNX2	RUNX1;RUNX2;RUNX2	0.0349948	cl_6	MESO
Regulation of RUNX2 expression and activity	RUNX2;RUNX2	0.0476117	cl_6	MESO
Regulation of RUNX1 Expression and Activity	RUNX1;RUNX1	0.0644094	cl_6	MESO
RUNX2 regulates osteoblast differentiation	RUNX2	0.0644094	cl_6	MESO
RUNX2 regulates genes involved in differentiation of myeloid cells	RUNX1;RUNX2	0.000720356	cl_3	OV
RUNX1 regulates transcription of genes involved in differentiation of myeloid cells	RUNX1;RUNX2	0.00214754	cl_3	OV
RUNX1 and FOXP3 control the development of regulatory T lymphocytes (Tregs)	RUNX1;FOXP3;FOXP3	0.00436538	cl_3	OV
Transcriptional regulation by RUNX1	RUNX1;RUNX2;GATA3;LMO2;FOXP3;RUNX1;FOXP3	0.00436538	cl_3	OV
RUNX3 regulates RUNX1-mediated transcription	RUNX1	0.00436538	cl_3	OV
Regulation of TP53 Expression	PRDM1;PRDM1	0.00436538	cl_3	OV
RUNX2 regulates chondrocyte maturation	RUNX2	0.0109327	cl_3	OV
Transcriptional regulation of granulopoiesis	RUNX1;CEBPA;CEBPA	0.0109327	cl_3	OV
RUNX2 regulates osteoblast differentiation	RUNX2;MAF	0.012457	cl_3	OV
RUNX1 regulates transcription of genes involved in WNT signaling	RUNX1;FOXP3	0.012999	cl_3	OV
Transcriptional regulation by RUNX2	RUNX1;RUNX2;MAF;RUNX2	0.0169558	cl_3	OV
RUNX2 regulates bone development	RUNX2;MAF	0.0169558	cl_3	OV
RUNX2 regulates genes involved in cell migration	RUNX2	0.0239843	cl_3	OV
Interferon gamma signaling	IRF8;CIITA;IRF8;IRF1;CIITA;IRF1	0.027875	cl_3	OV
NGF-stimulated transcription	LYL1;EGR2;EGR2	0.027875	cl_3	OV
YAP1- and WWTR1 (TAZ)-stimulated gene expression	RUNX2	0.027875	cl_3	OV
Nuclear Events (kinase and transcription factor activation)	LYL1;EGR2;EGR2	0.066365	cl_3	OV
Regulation of RUNX2 expression and activity	RUNX2;RUNX2	0.0666967	cl_3	OV
Regulation of RUNX1 Expression and Activity	RUNX1;RUNX1	0.0666967	cl_3	OV
EGR2 and SOX10-mediated initiation of Schwann cell myelination	EGR2;EGR2	0.0963861	cl_3	OV
RUNX1 regulates transcription of genes involved in differentiation of HSCs	RUNX1;GATA3;LMO2	0.0978549	cl_3	OV
Transcriptional regulation of white adipocyte differentiation	CEBPA;EGR2;CEBPA	0.0978549	cl_3	OV
Interferon alpha/beta signaling	IRF8;IRF8;IRF1;IRF1	0.0978549	cl_3	OV
Regulation of TP53 Expression and Degradation	PRDM1;PRDM1	0.0978549	cl_3	OV
Chromatin modifying enzymes	EP400;KDM1A;KDM6B;SMARCA4;RCOR1	0.039826	cl_1	OV
Chromatin organization	EP400;KDM1A;KDM6B;SMARCA4;RCOR1	0.039826	cl_1	OV
HDMs demethylate histones	KDM1A;KDM6B	0.081021	cl_1	OV
Regulation of beta-cell development	HNF4G;HES1;HNF1B;PDX1;HNF4A;HES1;HNF4A;HNF1B;FOXA2;HNF4G;PDX1	0.000528159	cl_2	PAAD
Regulation of gene expression in beta cells	HNF4G;PDX1;HNF4A;HNF4A;FOXA2;HNF4G;PDX1	0.00138685	cl_2	PAAD
Nuclear Receptor transcription pathway	RARA;HNF4G;NR1H3;PPARG;NR1D1;NR1H2;HNF4A;ESRRA;NCOR2;RARG;NR2F6	0.0113855	cl_2	PAAD
Response of EIF2AK1 (HRI) to heme deficiency	DDIT3;CEBPG;CEBPB;ATF4;DDIT3;ATF4	0.0116005	cl_2	PAAD
Signaling by TCF7L2 mutants	CTBP1;CTBP2;TCF7L2	0.019404	cl_2	PAAD
SMAD2/SMAD3:SMAD4 heterotrimer regulates transcription	JUNB;E2F4;HDAC1;TGIF1;SMAD3;JUNB;CDK9	0.0389927	cl_2	PAAD
Transcriptional activity of SMAD2/SMAD3:SMAD4 heterotrimer	JUNB;E2F4;HDAC1;TGIF1;SMAD3;NCOR2;JUNB;CDK9	0.048079	cl_2	PAAD
Transcriptional regulation of white adipocyte differentiation	PPARG;CEBPD;NCOR2;KLF5;CEBPB;PPARG;KLF4;CEBPB;CEBPD;RELA;KLF5	0.0903161	cl_2	PAAD
GLI proteins bind promoters of Hh responsive genes to promote transcription	GLI1;GLI2;GLI3;GLI1	0.00396298	cl_3	PAAD
MECP2 regulates transcription factors	MEF2C;MEF2C;MECP2	0.00396298	cl_3	PAAD
Activation of anterior HOX genes in hindbrain development during early embryogenesis	HOXA4;PAX6;MAFB;MEIS1;HOXB4;HOXA4;EGR2;HOXB4	0.00396298	cl_3	PAAD
Activation of HOX genes during differentiation	HOXA4;PAX6;MAFB;MEIS1;HOXB4;HOXA4;EGR2;HOXB4	0.00396298	cl_3	PAAD
RUNX2 regulates bone development	RUNX2;HEY1;MAF;GLI2;GLI3	0.00872143	cl_3	PAAD
RUNX2 regulates genes involved in differentiation of myeloid cells	RUNX1;RUNX2	0.01022	cl_3	PAAD
RUNX2 regulates chondrocyte maturation	RUNX2;GLI2	0.0134514	cl_3	PAAD
YAP1- and WWTR1 (TAZ)-stimulated gene expression	RUNX2;TEAD2;KAT2B	0.0134514	cl_3	PAAD
RUNX2 regulates osteoblast differentiation	RUNX2;HEY1;MAF;GLI3	0.0139705	cl_3	PAAD
Transcriptional Regulation by MECP2	MEF2C;MECP2;MEF2C;MECP2;NOTCH1	0.0147005	cl_3	PAAD
NOTCH3 Intracellular Domain Regulates Transcription	IKZF1;HEY1;NOTCH1;HEY1;KAT2B	0.0148332	cl_3	PAAD
Loss of MECP2 binding ability to 5hmC-DNA	MECP2	0.0170748	cl_3	PAAD
RUNX1 regulates transcription of genes involved in differentiation of myeloid cells	RUNX1;RUNX2	0.0270328	cl_3	PAAD
NOTCH4 Intracellular Domain Regulates Transcription	HEY1;NOTCH1;HEY1;KAT2B	0.0278601	cl_3	PAAD
Transcriptional regulation by RUNX3	RUNX1;TCF7;LEF1;NOTCH1;RUNX1;TEAD2;KAT2B	0.0278601	cl_3	PAAD
Interleukin-21 signaling	STAT4;STAT5B;STAT5A	0.0282339	cl_3	PAAD
Interleukin-20 family signaling	STAT4;STAT2;STAT5B;STAT5A	0.0355016	cl_3	PAAD
RUNX3 regulates RUNX1-mediated transcription	RUNX1	0.0414325	cl_3	PAAD
Regulation of TP53 Expression	PRDM1;PRDM1	0.0414325	cl_3	PAAD
MECP2 regulates neuronal receptors and channels	MECP2;NOTCH1	0.0429662	cl_3	PAAD
RUNX1 and FOXP3 control the development of regulatory T lymphocytes (Tregs)	RUNX1;FOXP3;FOXP3	0.0547792	cl_3	PAAD
Loss of MECP2 binding ability to 5mC-DNA	MECP2	0.0568911	cl_3	PAAD
Transcriptional regulation by RUNX2	RUNX1;RUNX2;HEY1;MAF;RUNX2;GLI2;GLI3	0.0678818	cl_3	PAAD
MECP2 regulates transcription of genes involved in GABA signaling	MECP2	0.0678818	cl_3	PAAD
Regulation of MECP2 expression and activity	MECP2;MECP2	0.0678818	cl_3	PAAD
Signaling by NOTCH3	IKZF1;HEY1;NOTCH1;HEY1;KAT2B	0.0678818	cl_3	PAAD
Interferon alpha/beta signaling	IRF8;IRF5;IRF4;IRF8;STAT2;IRF1;IRF5;IRF4;IRF1	0.0817437	cl_3	PAAD
Loss of phosphorylation of MECP2 at T308	MECP2	0.0817437	cl_3	PAAD
Regulation of MECP2 expression and activity	MECP2;NCOR2;SIN3A;NCOR1;CREB1;MECP2;HDAC2	0.0179106	cl_5	PRAD
Chromatin modifying enzymes	CLOCK;EP400;RBBP5;TRRAP;KDM5B;KDM4A;ATF2;NCOR2;KDM5A;NCOR1;KDM4C;DR1;BRD1;REST;ARID2;RCOR1;PHF20;SMARCC2;SMARCC1;HDAC2;CREBBP;PHF8;KAT2B;HCFC1	0.0266878	cl_5	PRAD
Chromatin organization	CLOCK;EP400;RBBP5;TRRAP;KDM5B;KDM4A;ATF2;NCOR2;KDM5A;NCOR1;KDM4C;DR1;BRD1;REST;ARID2;RCOR1;PHF20;SMARCC2;SMARCC1;HDAC2;CREBBP;PHF8;KAT2B;HCFC1	0.0266878	cl_5	PRAD
Loss of MECP2 binding ability to the NCoR/SMRT complex	NCOR2;NCOR1;MECP2	0.0342539	cl_5	PRAD
Pervasive developmental disorders	NCOR2;SIN3A;NCOR1;MECP2	0.0342539	cl_5	PRAD
Disorders of Nervous System Development	NCOR2;SIN3A;NCOR1;MECP2	0.0342539	cl_5	PRAD
Loss of function of MECP2 in Rett syndrome	NCOR2;SIN3A;NCOR1;MECP2	0.0342539	cl_5	PRAD
Disorders of Developmental Biology	NCOR2;SIN3A;NCOR1;MECP2	0.0342539	cl_5	PRAD
MECP2 regulates transcription factors	CREB1;CREB1;MECP2	0.0455767	cl_5	PRAD
RUNX1 interacts with co-factors whose precise effect on RUNX1 targets is not known	CSNK2A1;SMARCC2;RYBP;SMARCC1;BMI1;ARID2;RNF2	0.0555753	cl_5	PRAD
Loss of MECP2 binding ability to 5mC-DNA	SIN3A;MECP2	0.0555753	cl_5	PRAD
MECP2 regulates transcription of neuronal ligands	SIN3A;CREB1;MECP2	0.0871956	cl_5	PRAD
SUMOylation of transcription cofactors	NCOR2;SIN3A;CREBBP;PIAS1;BMI1;CASP8AP2;RNF2	0.0871956	cl_5	PRAD
Response of EIF2AK1 (HRI) to heme deficiency	DDIT3;ATF4;DDIT3;ATF4	0.00287549	cl_2	PRAD
ATF6 (ATF6-alpha) activates chaperone genes	DDIT3;DDIT3;ATF4	0.0509782	cl_2	PRAD
ATF6 (ATF6-alpha) activates chaperones	DDIT3;DDIT3;ATF4	0.0509782	cl_2	PRAD
PERK regulates gene expression	DDIT3;ATF4;DDIT3;ATF4	0.0509782	cl_2	PRAD
Repression of WNT target genes	HDAC1;TCF7;LEF1;TCF7L1;TCF7L2	0.00377925	cl_1	PRAD
Deactivation of the beta-catenin transactivating complex	SOX9;HDAC1;TCF7;LEF1;SOX2;TCF7L1;TCF7L2	0.00377925	cl_1	PRAD
RUNX3 regulates WNT signaling	TCF7;LEF1;TCF7L1;TCF7L2	0.00377925	cl_1	PRAD
Binding of TCF/LEF:CTNNB1 to target gene promoters	TCF7;LEF1;TCF7L1;TCF7L2	0.00377925	cl_1	PRAD
Transcriptional regulation of pluripotent stem cells	STAT3;SOX2;SOX2;GATA6;STAT3;PBX1	0.0142011	cl_1	PRAD
Nuclear Receptor transcription pathway	NR2F1;NR1H3;RORA;NR5A2;ESR1	0.0142011	cl_1	PRAD
YAP1- and WWTR1 (TAZ)-stimulated gene expression	RUNX2;WWTR1;YAP1	0.0195678	cl_1	PRAD
RUNX2 regulates osteoblast differentiation	RUNX2;WWTR1;YAP1;GLI3	0.0195678	cl_1	PRAD
GLI proteins bind promoters of Hh responsive genes to promote transcription	GLI1;GLI3;GLI1	0.0195678	cl_1	PRAD
NOTCH3 Intracellular Domain Regulates Transcription	HEYL;IKZF1;PBX1;HEYL;PBX1	0.0219327	cl_1	PRAD
Interleukin-4 and Interleukin-13 signaling	STAT6;RORA;GATA3;CEBPD;STAT3;SOX2;RORA;SOX2;FOXO1;FOXO1;CEBPD;GATA3	0.0265224	cl_1	PRAD
RUNX2 regulates bone development	RUNX2;WWTR1;YAP1;GLI3	0.0400427	cl_1	PRAD
Response of EIF2AK1 (HRI) to heme deficiency	ATF5;CEBPB;ATF4;ATF5;ATF4	0.00896988	cl_2	SARC
Transcriptional regulation of granulopoiesis	RUNX1;MYC;H2AFX;MYC;CEBPB;CEBPB;FLI1	0.0144234	cl_2	SARC
RUNX2 regulates genes involved in differentiation of myeloid cells	RUNX1;RUNX2	0.0307438	cl_2	SARC
Interferon alpha/beta signaling	IRF8;IRF5;STAT1;IRF8;IRF3;IRF2;IRF1;IRF5;IRF3;IRF2;IRF1	0.0312361	cl_2	SARC
NOTCH3 Intracellular Domain Regulates Transcription	IKZF1;STAT1;HEY1;HEY1;RBPJ	0.054504	cl_2	SARC
Interferon gamma signaling	IRF8;CIITA;IRF5;IRF8;IRF3;IRF2;IRF1;CIITA;STAT1;IRF5;IRF3;IRF2;IRF1	0.0758328	cl_2	SARC
RUNX1 regulates transcription of genes involved in differentiation of myeloid cells	RUNX1;RUNX2	0.0758328	cl_2	SARC
Interleukin-21 signaling	STAT4;STAT1;STAT5A	0.0847874	cl_2	SARC
Chromatin modifying enzymes	EP400;CHD4;SETDB1;ATF7IP;ATF2;NCOR2;KDM5A;KDM4C;BRD1;KDM5C;KDM3A;RCOR1;EZH2;PHF20;SMARCC1;CREBBP;SMARCA4;KAT2B;HCFC1	0.058856	cl_1	SARC
Chromatin organization	EP400;CHD4;SETDB1;ATF7IP;ATF2;NCOR2;KDM5A;KDM4C;BRD1;KDM5C;KDM3A;RCOR1;EZH2;PHF20;SMARCC1;CREBBP;SMARCA4;KAT2B;HCFC1	0.058856	cl_1	SARC
SUMOylation of transcription cofactors	NCOR2;SIN3A;CREBBP;PIAS1;BMI1;CASP8AP2;RNF2	0.058856	cl_1	SARC
Loss of MECP2 binding ability to 5hmC-DNA	MECP2	0.072703	cl_7	SARC
Cytokine Signaling in Immune system	IRF8;CIITA;IRF5;IRF8;IRF3;IRF2;IRF1;CIITA;PML;STAT4;STAT1;STAT2;IRF5;STAT1;IRF3;IRF2;BATF;IRF1;PML;BATF	0.0131045	cl_1	SKCM
RUNX1 and FOXP3 control the development of regulatory T lymphocytes (Tregs)	RUNX1;FOXP3;FOXP3	0.0157277	cl_1	SKCM
RUNX3 regulates RUNX1-mediated transcription	RUNX1	0.0157277	cl_1	SKCM
Regulation of TP53 Expression	PRDM1;PRDM1	0.0157277	cl_1	SKCM
Regulation of IFNA signaling	STAT1;STAT2	0.0453907	cl_1	SKCM
Interleukin-20 family signaling	STAT4;STAT1;STAT2	0.0453907	cl_1	SKCM
RUNX1 regulates transcription of genes involved in WNT signaling	RUNX1;FOXP3	0.0508524	cl_1	SKCM
Regulation of RUNX1 Expression and Activity	RUNX1;RUNX1;PML	0.0508524	cl_1	SKCM
Interleukin-21 signaling	STAT4;STAT1	0.0779822	cl_1	SKCM
NOTCH3 Intracellular Domain Regulates Transcription	HEYL;IKZF1;STAT1;PBX1;HEYL;CREBBP;PBX1	0.00128164	cl_1	STES.
MECP2 regulates transcription factors	MEF2C;MEF2C;MECP2	0.00530339	cl_1	STES.
RUNX3 regulates RUNX1-mediated transcription	RUNX3;RUNX1	0.00532127	cl_1	STES.
Interleukin-21 signaling	STAT4;STAT1;STAT5B;STAT5A	0.00532127	cl_1	STES.
Signaling by NOTCH3	HEYL;IKZF1;STAT1;PBX1;HEYL;CREBBP;PBX1	0.00866289	cl_1	STES.
Interleukin-20 family signaling	STAT4;STAT1;STAT2;STAT5B;STAT5A	0.00892913	cl_1	STES.
Activation of anterior HOX genes in hindbrain development during early embryogenesis	RARA;HOXA4;MAFB;MEIS1;HOXA4;EGR2;CREBBP;PBX1	0.00892913	cl_1	STES.
Activation of HOX genes during differentiation	RARA;HOXA4;MAFB;MEIS1;HOXA4;EGR2;CREBBP;PBX1	0.00892913	cl_1	STES.
GLI proteins bind promoters of Hh responsive genes to promote transcription	GLI1;GLI2;GLI1	0.0144769	cl_1	STES.
Interleukin-4 and Interleukin-13 signaling	HIF1A;BCL6;STAT1;IRF4;GATA3;BCL6;STAT1;IRF4;FOXO1;HIF1A;FOXO1;GATA3	0.0144769	cl_1	STES.
Loss of MECP2 binding ability to 5hmC-DNA	MECP2	0.0176746	cl_1	STES.
FOXO-mediated transcription of cell death genes	BCL6;BCL6;FOXO1;CREBBP	0.0176746	cl_1	STES.
Binding of TCF/LEF:CTNNB1 to target gene promoters	RUNX3;LEF1;TCF7L1	0.0176746	cl_1	STES.
RUNX3 regulates WNT signaling	RUNX3;LEF1;TCF7L1	0.0176746	cl_1	STES.
Transcriptional regulation by RUNX3	RUNX1;RUNX3;LEF1;RUNX1;CREBBP;TEAD1;TCF7L1	0.0247301	cl_1	STES.
Signaling by phosphorylated juxtamembrane, extracellular and kinase domain KIT mutants	STAT1;STAT5B;STAT5A	0.0314546	cl_1	STES.
Regulation of TP53 Expression	PRDM1;PRDM1	0.0449857	cl_1	STES.
Myogenesis	MEF2B;MEF2C;MEF2A;MEF2D	0.0460317	cl_1	STES.
Interleukin-9 signaling	STAT1;STAT5B;STAT5A	0.0481331	cl_1	STES.
Nuclear Events (kinase and transcription factor activation)	LYL1;MEF2C;MEF2A;EGR2;EGR2;MEF2D	0.0481331	cl_1	STES.
RUNX1 and FOXP3 control the development of regulatory T lymphocytes (Tregs)	RUNX1;FOXP3;FOXP3	0.0521254	cl_1	STES.
Loss of MECP2 binding ability to 5mC-DNA	MECP2	0.0521254	cl_1	STES.
Regulation of MECP2 expression and activity	MECP2;MECP2	0.0681932	cl_1	STES.
MECP2 regulates transcription of genes involved in GABA signaling	MECP2	0.0692707	cl_1	STES.
Transcriptional regulation by RUNX1	RUNX1;PAX5;GATA3;LMO2;FOXP3;RUNX1;LDB1;CREBBP;FOXP3;CBX6;PML	0.0783452	cl_1	STES.
RUNX1 regulates transcription of genes involved in BCR signaling	RUNX1;PAX5	0.0799106	cl_1	STES.
Loss of phosphorylation of MECP2 at T308	MECP2	0.0799106	cl_1	STES.
Signaling by KIT in disease	STAT1;STAT5B;STAT5A	0.0819272	cl_1	STES.
Transcriptional regulation of granulopoiesis	RUNX1;RARA;LEF1;PML;FLI1	0.0891261	cl_1	STES.
Transcriptional Regulation by MECP2	MEF2C;MECP2;MEF2C;MECP2	0.0897677	cl_1	STES.
Loss of MECP2 binding ability to the NCoR/SMRT complex	MECP2	0.094605	cl_1	STES.
Signaling by cytosolic FGFR1 fusion mutants	STAT1;STAT5B;STAT5A	0.0968703	cl_1	STES.
RUNX3 regulates YAP1-mediated transcription	RUNX3;TEAD1	0.0968703	cl_1	STES.
Erythropoietin activates STAT5	STAT5B;STAT5A	0.0968703	cl_1	STES.
RUNX1 regulates transcription of genes involved in WNT signaling	RUNX1;FOXP3	0.0968703	cl_1	STES.
STAT5 Activation	STAT5B;STAT5A	0.0968703	cl_1	STES.
Regulation of gene expression in beta cells	PDX1;HNF4A;HNF4A;FOXA2;PDX1	0.00192754	cl_2	STES.
Transcription of E2F targets under negative control by p107 (RBL1) and p130 (RBL2) in complex with HDAC1	E2F1;MYBL2;HDAC1;MYBL2;E2F1	0.00805061	cl_2	STES.
Transcriptional regulation of granulopoiesis	E2F1;H2AFX;CEBPA;CEBPB;CEBPB;CEBPA	0.00805061	cl_2	STES.
Transcriptional Regulation by E2F6	E2F1;CBX3;EED;EHMT2;E2F1;E2F6	0.0220563	cl_2	STES.
Regulation of beta-cell development	PDX1;HNF4A;HNF4A;FOXA2;PDX1	0.0220563	cl_2	STES.
TP53 Regulates Transcription of Genes Involved in G1 Cell Cycle Arrest	E2F1;ARID3A;ARID3A;E2F1	0.0382188	cl_2	STES.
G0 and Early G1	E2F1;MYBL2;HDAC1;MYBL2;E2F1	0.044224	cl_2	STES.
SUMOylation of transcription cofactors	CTBP1;SUMO2;TRIM28;UBE2I;CBX8	0.0734487	cl_2	STES.
ERCC6 (CSB) and EHMT2 (G9a) positively regulate rRNA expression	CBX3;HDAC1;H2AFX;EHMT2;HDAC2	0.095166	cl_2	STES.
Interleukin-21 signaling	STAT4;STAT1;STAT5B;STAT5A	0.000260194	cl_2	TGCT
Interleukin-20 family signaling	STAT4;STAT1;STAT2;STAT5B;STAT5A	0.000327263	cl_2	TGCT
Cytokine Signaling in Immune system	IRF8;CIITA;IRF5;IRF4;IRF8;IRF3;IRF1;STAT5B;STAT5A;CIITA;PML;STAT4;STAT1;STAT2;IRF5;STAT1;IRF4;IRF3;BATF;IRF1;PML;BATF	0.00353752	cl_2	TGCT
Signaling by phosphorylated juxtamembrane, extracellular and kinase domain KIT mutants	STAT1;STAT5B;STAT5A	0.00391809	cl_2	TGCT
Interleukin-9 signaling	STAT1;STAT5B;STAT5A	0.0107969	cl_2	TGCT
Transcriptional regulation of granulopoiesis	CEBPA;CEBPA;PML;FLI1	0.0114223	cl_2	TGCT
Signaling by KIT in disease	STAT1;STAT5B;STAT5A	0.0130174	cl_2	TGCT
Interleukin-2 family signaling	STAT4;STAT1;STAT5B;STAT5A	0.0244406	cl_2	TGCT
Signaling by cytosolic FGFR1 fusion mutants	STAT1;STAT5B;STAT5A	0.0288218	cl_2	TGCT
Regulation of IFNA signaling	STAT1;STAT2	0.0307802	cl_2	TGCT
Growth hormone receptor signaling	STAT1;STAT5B;STAT5A	0.0307802	cl_2	TGCT
Response of EIF2AK1 (HRI) to heme deficiency	ATF5;ATF5	0.0307802	cl_2	TGCT
STAT5 Activation	STAT5B;STAT5A	0.030947	cl_2	TGCT
Erythropoietin activates STAT5	STAT5B;STAT5A	0.030947	cl_2	TGCT
Signaling by SCF-KIT	STAT1;STAT5B;STAT5A	0.0313013	cl_2	TGCT
Transcriptional regulation of white adipocyte differentiation	EBF1;CEBPA;EBF1;EGR2;CEBPA	0.0313013	cl_2	TGCT
Downstream signal transduction	STAT1;STAT5B;STAT5A	0.0440018	cl_2	TGCT
Signaling by Leptin	STAT5B;STAT5A	0.0559886	cl_2	TGCT
Interleukin-35 Signalling	STAT4;STAT1	0.0700544	cl_2	TGCT
Interleukin-15 signaling	STAT5B;STAT5A	0.0700544	cl_2	TGCT
FGFR1 mutant receptor activation	STAT1;STAT5B;STAT5A	0.0700544	cl_2	TGCT
RUNX1 and FOXP3 control the development of regulatory T lymphocytes (Tregs)	FOXP3;FOXP3	0.0700544	cl_2	TGCT
Interleukin-6 signaling	STAT1	0.0780556	cl_2	TGCT
Prolactin receptor signaling	STAT5B;STAT5A	0.0780556	cl_2	TGCT
Interleukin-2 signaling	STAT5B;STAT5A	0.0837276	cl_2	TGCT
NGF-stimulated transcription	LYL1;EGR2;EGR2	0.0837276	cl_2	TGCT
STAT5 activation downstream of FLT3 ITD mutants	STAT5B;STAT5A	0.0869143	cl_2	TGCT
Interleukin-4 and Interleukin-13 signaling	STAT1;IRF4;STAT1;IRF4;BATF;BATF	0.0887833	cl_2	TGCT
Signaling by FGFR1 in disease	STAT1;STAT5B;STAT5A	0.0917648	cl_2	TGCT
Transcriptional regulation of pluripotent stem cells	SOX2;PRDM14;POU5F1;SOX2;GATA6;POU5F1	0.0105747	cl_3	TGCT
ATF6 (ATF6-alpha) activates chaperone genes	DDIT3;NFYC;DDIT3;ATF4	0.0276276	cl_3	TGCT
Response of EIF2AK1 (HRI) to heme deficiency	DDIT3;ATF4;DDIT3;ATF4	0.0276276	cl_3	TGCT
ATF6 (ATF6-alpha) activates chaperones	DDIT3;NFYC;DDIT3;ATF4	0.0276276	cl_3	TGCT
GLI proteins bind promoters of Hh responsive genes to promote transcription	GLI1;GLI2;GLI1	0.0321788	cl_3	TGCT
TP53 Regulates Transcription of Genes Involved in G1 Cell Cycle Arrest	E2F7;ARID3A;ARID3A;E2F7	0.0339349	cl_3	TGCT
POU5F1 (OCT4), SOX2, NANOG repress genes related to differentiation	SOX2;GATA6;POU5F1	0.0436092	cl_3	TGCT
PERK regulates gene expression	DDIT3;NFYC;ATF4;DDIT3;ATF4	0.0558132	cl_3	TGCT
Regulation of beta-cell development	HNF4A;HNF4A;NR5A2;NR5A2	0.0721948	cl_3	TGCT
SUMOylation of transcription cofactors	CBX2;SIN3A;CREBBP;PIAS1;BMI1;DDX5;CASP8AP2;RNF2	0.0760301	cl_1	TGCT
MECP2 regulates transcription factors	CREB1;CREB1;MECP2	0.099735	cl_1	TGCT
RUNX2 regulates genes involved in differentiation of myeloid cells	RUNX1;RUNX2;CBFB	0.000546034	cl_2	THCA
RUNX1 regulates transcription of genes involved in differentiation of myeloid cells	RUNX1;RUNX2;CBFB	0.00265336	cl_2	THCA
RUNX3 regulates RUNX1-mediated transcription	CBFB;RUNX1	0.00265336	cl_2	THCA
RUNX1 and FOXP3 control the development of regulatory T lymphocytes (Tregs)	RUNX1;CBFB;FOXP3;FOXP3	0.00774727	cl_2	THCA
RUNX2 regulates chondrocyte maturation	RUNX2;CBFB	0.00832989	cl_2	THCA
RUNX1 regulates transcription of genes involved in WNT signaling	RUNX1;CBFB;FOXP3	0.0143532	cl_2	THCA
Transcriptional regulation of granulopoiesis	RUNX1;CBFB;STAT3;KLF5;PML;KLF5	0.0223932	cl_2	THCA
Interleukin-21 signaling	STAT4;STAT1;STAT3	0.0247424	cl_2	THCA
Interleukin-20 family signaling	STAT4;STAT1;STAT3;STAT2	0.0255917	cl_2	THCA
RUNX2 regulates genes involved in cell migration	RUNX2;CBFB	0.0298408	cl_2	THCA
Regulation of RUNX1 Expression and Activity	RUNX1;CBFB;RUNX1;PML	0.0298408	cl_2	THCA
Transcriptional regulation by RUNX1	RUNX1;RUNX2;CBFB;GATA3;RYBP;FOXP3;RUNX1;FOXP3;SMARCA4;PML	0.0301872	cl_2	THCA
Transcriptional regulation by RUNX3	RUNX1;CTNNB1;CBFB;SMAD3;RUNX1;TEAD1	0.0312739	cl_2	THCA
Interleukin-35 Signalling	STAT4;STAT1;STAT3	0.0312739	cl_2	THCA
YAP1- and WWTR1 (TAZ)-stimulated gene expression	RUNX2;TEAD1	0.0392644	cl_2	THCA
Interleukin-6 signaling	STAT1;STAT3	0.0392644	cl_2	THCA
RUNX1 interacts with co-factors whose precise effect on RUNX1 targets is not known	RUNX1;CBFB;RYBP;SMARCA4	0.0399092	cl_2	THCA
RUNX1 regulates transcription of genes involved in interleukin signaling	RUNX1;CBFB	0.0671471	cl_2	THCA
RUNX1 regulates transcription of genes involved in BCR signaling	RUNX1;CBFB	0.0671471	cl_2	THCA
RUNX1 regulates expression of components of tight junctions	RUNX1;CBFB	0.081109	cl_2	THCA
Regulation of RUNX2 expression and activity	RUNX2;CBFB;STAT1;RUNX2	0.0857768	cl_2	THCA
Regulation of IFNA signaling	STAT1;STAT2	0.0889867	cl_2	THCA
Signaling by phosphorylated juxtamembrane, extracellular and kinase domain KIT mutants	STAT1;STAT3	0.0889867	cl_2	THCA
Circadian Clock	PPARGC1A;CLOCK;TBL1XR1;PPARA;ATF2;PPARGC1A;PPARA;CLOCK;MEF2D;RORA;RORA;HDAC3;CREBBP	0.0148767	cl_4	THCA
Chromatin modifying enzymes	CLOCK;EP400;RBBP5;TRRAP;TBL1XR1;ATF7IP;KDM4A;ATF2;KDM5A;KDM4C;DR1;REST;KDM5C;KDM3A;ARID2;AEBP2;HDAC3;SUZ12;SMARCC1;CREBBP;PHF8;KAT2B	0.0148767	cl_4	THCA
Chromatin organization	CLOCK;EP400;RBBP5;TRRAP;TBL1XR1;ATF7IP;KDM4A;ATF2;KDM5A;KDM4C;DR1;REST;KDM5C;KDM3A;ARID2;AEBP2;HDAC3;SUZ12;SMARCC1;CREBBP;PHF8;KAT2B	0.0148767	cl_4	THCA
Loss of MECP2 binding ability to the NCoR/SMRT complex	TBL1XR1;HDAC3;MECP2	0.0148767	cl_4	THCA
Disorders of Developmental Biology	TBL1XR1;SIN3A;HDAC3;MECP2	0.0148767	cl_4	THCA
Disorders of Nervous System Development	TBL1XR1;SIN3A;HDAC3;MECP2	0.0148767	cl_4	THCA
Pervasive developmental disorders	TBL1XR1;SIN3A;HDAC3;MECP2	0.0148767	cl_4	THCA
Loss of function of MECP2 in Rett syndrome	TBL1XR1;SIN3A;HDAC3;MECP2	0.0148767	cl_4	THCA
FOXO-mediated transcription of cell cycle genes	RBL2;RBL2;SMAD4;FOXO1;SMAD2;FOXO3	0.0196592	cl_4	THCA
Regulation of MECP2 expression and activity	TBL1XR1;MECP2;SIN3A;HDAC3;MECP2	0.0210423	cl_4	THCA
Loss of MECP2 binding ability to 5mC-DNA	SIN3A;MECP2	0.0303548	cl_4	THCA
HDMs demethylate histones	KDM4A;KDM5A;KDM4C;KDM5C;KDM3A;PHF8	0.0303548	cl_4	THCA
Transcriptional activation of mitochondrial biogenesis	PPARGC1A;TBL1XR1;ATF2;HDAC3;GABPA;CREBBP;PPARGC1A;PPARA;MEF2D;GABPA	0.0348808	cl_4	THCA
FOXO-mediated transcription	NFYA;RBL2;RBL2;SMAD4;FOXO1;SIN3A;SMAD2;FOXO3;CREBBP;PPARGC1A;KAT2B	0.0548713	cl_4	THCA
Loss of MECP2 binding ability to 5hmC-DNA	MECP2	0.0702506	cl_4	THCA
Regulation of FOXO transcriptional activity by acetylation	FOXO1;FOXO3;CREBBP;KAT2B	0.0702506	cl_4	THCA
ATF6 (ATF6-alpha) activates chaperone genes	DDIT3;NFYC;XBP1;DDIT3;XBP1	0.0063539	cl_1	THCA
Repression of WNT target genes	CTBP1;HDAC1;LEF1;TCF7L1;TCF7L2	0.0063539	cl_1	THCA
ATF6 (ATF6-alpha) activates chaperones	DDIT3;NFYC;XBP1;DDIT3;XBP1	0.0063539	cl_1	THCA
SUMOylation of transcription cofactors	CTBP1;SUMO2;TRIM28;SUMO1;RING1;DDX5;CBX8	0.00841415	cl_1	THCA
Cellular Senescence	ERF;KDM6B;KAT5;EHMT2;RING1;KDM6B;CEBPB;CEBPB;CBX8;ETS2;FOS;ETS1;ETS2	0.0783298	cl_1	THCA
Unfolded Protein Response (UPR)	ZBTB17;DDIT3;NFYC;CREB3;ZBTB17;XBP1;CEBPB;DDIT3;XBP1	0.0800886	cl_1	THCA
RUNX3 regulates WNT signaling	LEF1;TCF7L1;TCF7L2	0.0843095	cl_1	THCA
Binding of TCF/LEF:CTNNB1 to target gene promoters	LEF1;TCF7L1;TCF7L2	0.0843095	cl_1	THCA
Signaling by TCF7L2 mutants	CTBP1;TCF7L2	0.0981011	cl_1	THCA
NOTCH1 Intracellular Domain Regulates Transcription	HEYL;HES1;TBL1X;HES1;HEY1;NCOR2;NCOR1;HEYL;HEY1;CREBBP;KAT2B	0.00187898	cl_2	THYM
Loss of MECP2 binding ability to the NCoR/SMRT complex	TBL1X;NCOR2;NCOR1;MECP2	0.00189288	cl_2	THYM
Signaling by NOTCH3	HEYL;HES1;STAT1;HES1;HEY1;PBX1;HEYL;HEY1;CREBBP;PBX1;KAT2B	0.00205072	cl_2	THYM
Signaling by NOTCH1 PEST Domain Mutants in Cancer	HEYL;HES1;TBL1X;HES1;HEY1;NCOR2;NCOR1;HEYL;HEY1;CREBBP;KAT2B	0.00205072	cl_2	THYM
Constitutive Signaling by NOTCH1 HD+PEST Domain Mutants	HEYL;HES1;TBL1X;HES1;HEY1;NCOR2;NCOR1;HEYL;HEY1;CREBBP;KAT2B	0.00205072	cl_2	THYM
Constitutive Signaling by NOTCH1 PEST Domain Mutants	HEYL;HES1;TBL1X;HES1;HEY1;NCOR2;NCOR1;HEYL;HEY1;CREBBP;KAT2B	0.00205072	cl_2	THYM
Signaling by NOTCH1 HD+PEST Domain Mutants in Cancer	HEYL;HES1;TBL1X;HES1;HEY1;NCOR2;NCOR1;HEYL;HEY1;CREBBP;KAT2B	0.00205072	cl_2	THYM
Signaling by NOTCH1 in Cancer	HEYL;HES1;TBL1X;HES1;HEY1;NCOR2;NCOR1;HEYL;HEY1;CREBBP;KAT2B	0.00205072	cl_2	THYM
NOTCH4 Intracellular Domain Regulates Transcription	HES1;HES1;HEY1;SMAD3;HEY1;CREBBP;KAT2B	0.00223715	cl_2	THYM
Circadian Clock	ATF2;MEF2C;RXRA;NCOR1;TBL1X;RORA;NR1D1;NR1D1;RORA;MED1;KLF15;CREBBP;KLF15	0.00463088	cl_2	THYM
Signaling by NOTCH1	HEYL;HES1;TBL1X;HES1;HEY1;NCOR2;NCOR1;HEYL;HEY1;CREBBP;KAT2B	0.00892107	cl_2	THYM
Disorders of Developmental Biology	TBL1X;NCOR2;NCOR1;MECP2	0.00892107	cl_2	THYM
Loss of function of MECP2 in Rett syndrome	TBL1X;NCOR2;NCOR1;MECP2	0.00892107	cl_2	THYM
Pervasive developmental disorders	TBL1X;NCOR2;NCOR1;MECP2	0.00892107	cl_2	THYM
Disorders of Nervous System Development	TBL1X;NCOR2;NCOR1;MECP2	0.00892107	cl_2	THYM
MECP2 regulates transcription factors	MEF2C;MEF2C;MECP2	0.0138382	cl_2	THYM
Regulation of MECP2 expression and activity	TBL1X;MECP2;NCOR2;NCOR1;MECP2	0.0142782	cl_2	THYM
Transcriptional activation of mitochondrial biogenesis	TBL1X;NR1D1;ATF2;MEF2C;MED1;RXRA;NCOR1;GABPA;CREBBP;GABPA	0.0308062	cl_2	THYM
RORA activates gene expression	TBL1X;RORA;MED1;RXRA;CREBBP	0.0503255	cl_2	THYM
Loss of MECP2 binding ability to 5hmC-DNA	MECP2	0.0555534	cl_2	THYM
RUNX3 regulates NOTCH signaling	HES1;HES1;CREBBP;KAT2B	0.0558667	cl_2	THYM
Downregulation of SMAD2/3:SMAD4 transcriptional activity	TGIF1;SMAD3;SMAD4;NCOR2;NCOR1	0.0558667	cl_2	THYM
Activation of HOX genes during differentiation	RARA;HOXA4;RBBP5;MAFB;MEIS1;RXRA;NCOR1;HOXA4;CREBBP;PBX1	0.0558667	cl_2	THYM
Activation of anterior HOX genes in hindbrain development during early embryogenesis	RARA;HOXA4;RBBP5;MAFB;MEIS1;RXRA;NCOR1;HOXA4;CREBBP;PBX1	0.0558667	cl_2	THYM
Notch-HLH transcription pathway	TBL1X;NCOR2;NCOR1;CREBBP;KAT2B	0.0619514	cl_2	THYM
BMAL1:CLOCK,NPAS2 activates circadian gene expression	TBL1X;MED1;KLF15;RXRA;CREBBP;KLF15	0.0701754	cl_2	THYM
RUNX2 regulates bone development	RUNX2;HES1;HEY1;SMAD4;SMAD1	0.0741656	cl_2	THYM
SMAD4 MH2 Domain Mutants in Cancer	SMAD3;SMAD4	0.0758744	cl_2	THYM
Loss of Function of SMAD4 in Cancer	SMAD3;SMAD4	0.0758744	cl_2	THYM
SMAD2/3 MH2 Domain Mutants in Cancer	SMAD3;SMAD4	0.0758744	cl_2	THYM
Transcriptional regulation of white adipocyte differentiation	TBL1X;CEBPD;NCOR2;MED1;RXRA;NCOR1;KLF5;CREBBP;CEBPD;KLF5	0.0758744	cl_2	THYM
Binding of TCF/LEF:CTNNB1 to target gene promoters	CTNNB1;TCF7L1;TCF7L2	0.0758744	cl_2	THYM
RUNX3 regulates WNT signaling	CTNNB1;TCF7L1;TCF7L2	0.0758744	cl_2	THYM
Regulation of gene expression in late stage (branching morphogenesis) pancreatic bud precursor cells	HES1;HES1;CREBBP;KAT2B	0.0787325	cl_2	THYM
RUNX1 regulates transcription of genes involved in differentiation of myeloid cells	RUNX2;CREBBP	0.0984452	cl_2	THYM
Transcription of E2F targets under negative control by p107 (RBL1) and p130 (RBL2) in complex with HDAC1	E2F1;MYBL2;E2F4;HDAC1;MYBL2;E2F1	0.00166482	cl_3	THYM
Formation of the beta-catenin:TCF transactivating complex	ASH2L;HDAC1;MYC;H2AFX;TCF7;MYC;LEF1;TLE3;SMARCA4	0.00337533	cl_3	THYM
G0 and Early G1	E2F1;MYBL2;E2F4;HDAC1;MYC;MYBL2;E2F1	0.00337533	cl_3	THYM
Regulation of PTEN gene transcription	HDAC1;KDM1A;CHD4;MBD3;TP53;HDAC3;HDAC2;EZH2;CBX8	0.0035771	cl_3	THYM
Deactivation of the beta-catenin transactivating complex	CTBP1;ASH2L;HDAC1;TCF7;LEF1;TLE3;SOX4	0.00441588	cl_3	THYM
Binding of TCF/LEF:CTNNB1 to target gene promoters	MYC;TCF7;MYC;LEF1	0.00441588	cl_3	THYM
RUNX3 regulates WNT signaling	MYC;TCF7;MYC;LEF1	0.00441588	cl_3	THYM
Transcriptional Regulation by E2F6	E2F1;CBX3;BRCA1;BRCA1;E2F1;L3MBTL2;EZH2	0.0047911	cl_3	THYM
ERCC6 (CSB) and EHMT2 (G9a) positively regulate rRNA expression	CBX3;HDAC1;CHD4;H2AFX;MBD3;TTF1;HDAC2	0.00571333	cl_3	THYM
HDACs deacetylate histones	GPS2;HDAC1;KDM1A;CHD4;MBD3;HDAC3;HDAC2;SAP30	0.00676304	cl_3	THYM
Estrogen-dependent gene expression	HDAC1;GATA3;KDM1A;MYC;H2AFX;MYB;MYC;USF1;USF2;MYB;TLE3;CDK9	0.00900788	cl_3	THYM
Transcription of E2F targets under negative control by DREAM complex	E2F1;E2F4;HDAC1;MYC;E2F1	0.00900788	cl_3	THYM
p75NTR negatively regulates cell cycle via SC1	HDAC1;HDAC3;HDAC2	0.0103479	cl_3	THYM
Epigenetic regulation of gene expression	CBX3;HDAC1;CHD4;H2AFX;DNMT3A;UBTF;MBD3;TTF1;HDAC2;SAP30;EZH2	0.0121956	cl_3	THYM
RNA Polymerase I Promoter Clearance	CBX3;HDAC1;CHD4;H2AFX;UBTF;MBD3;TTF1;HDAC2	0.0246662	cl_3	THYM
RNA Polymerase I Transcription Initiation	HDAC1;CHD4;UBTF;MBD3;TTF1;HDAC2	0.0246662	cl_3	THYM
RNA Polymerase I Transcription	CBX3;HDAC1;CHD4;H2AFX;UBTF;MBD3;TTF1;HDAC2	0.0246662	cl_3	THYM
Chromatin modifying enzymes	ASH2L;HDAC1;CHD4;H2AFX;EZH2;WDR5;GPS2;KDM1A;DNMT3A;MBD3;HDAC3;HDAC2;SMARCA4;SAP30;HCFC1	0.0246662	cl_3	THYM
Chromatin organization	ASH2L;HDAC1;CHD4;H2AFX;EZH2;WDR5;GPS2;KDM1A;DNMT3A;MBD3;HDAC3;HDAC2;SMARCA4;SAP30;HCFC1	0.0246662	cl_3	THYM
Regulation of TP53 Activity through Acetylation	HDAC1;CHD4;MBD3;TP53;HDAC2	0.0347601	cl_3	THYM
SMAD2/SMAD3:SMAD4 heterotrimer regulates transcription	E2F4;HDAC1;MYC;MYC;CDK9	0.0347601	cl_3	THYM
NOTCH1 Intracellular Domain Regulates Transcription	HDAC1;MYC;MYC;HDAC3;HDAC2;TLE3	0.0347601	cl_3	THYM
Positive epigenetic regulation of rRNA expression	CBX3;HDAC1;CHD4;H2AFX;MBD3;TTF1;HDAC2	0.0434577	cl_3	THYM
SUMOylation of transcription cofactors	CTBP1;TRIM28;PPARGC1A;DAXX;CBX8	0.0494188	cl_3	THYM
Regulation of TP53 Expression	TP53;TP53	0.0494188	cl_3	THYM
SUMO E3 ligases SUMOylate target proteins	CTBP1;BRCA1;HDAC1;TRIM28;DNMT3A;TP53;L3MBTL2;HDAC2;PPARGC1A;DAXX;CBX8	0.0534687	cl_3	THYM
Degradation of beta-catenin by the destruction complex	CTBP1;HDAC1;TCF7;MYC;LEF1;TLE3	0.0660832	cl_3	THYM
SUMOylation	CTBP1;BRCA1;HDAC1;TRIM28;DNMT3A;TP53;L3MBTL2;HDAC2;PPARGC1A;DAXX;CBX8	0.0660832	cl_3	THYM
Loss of function of MECP2 in Rett syndrome	GPS2;HDAC1;HDAC3	0.0660832	cl_3	THYM
Disorders of Developmental Biology	GPS2;HDAC1;HDAC3	0.0660832	cl_3	THYM
Pervasive developmental disorders	GPS2;HDAC1;HDAC3	0.0660832	cl_3	THYM
Disorders of Nervous System Development	GPS2;HDAC1;HDAC3	0.0660832	cl_3	THYM
Transcriptional regulation of granulopoiesis	E2F1;MYC;H2AFX;MYB;MYC;LEF1	0.0708563	cl_3	THYM
Activation of NOXA and translocation to mitochondria	E2F1;TP53	0.0808673	cl_3	THYM
Transcriptional activity of SMAD2/SMAD3:SMAD4 heterotrimer	E2F4;HDAC1;MYC;MYC;CDK9	0.091343	cl_3	THYM
TP53 Regulates Transcription of Genes Involved in G1 Cell Cycle Arrest	E2F1;TP53;E2F1	0.0964427	cl_3	THYM
NoRC negatively regulates rRNA expression	HDAC1;H2AFX;UBTF;TTF1;HDAC2;SAP30	0.0976674	cl_3	THYM
RUNX3 regulates RUNX1-mediated transcription	RUNX3	0.0280754	cl_4	THYM
RUNX3 regulates BCL2L11 (BIM) transcription	RUNX3	0.0280754	cl_4	THYM
RUNX3 regulates CDKN1A transcription	RUNX3	0.0280754	cl_4	THYM
RUNX3 regulates YAP1-mediated transcription	RUNX3	0.0280754	cl_4	THYM
RUNX3 Regulates Immune Response and Cell Migration	RUNX3	0.0280754	cl_4	THYM
RUNX3 regulates WNT signaling	RUNX3	0.0280754	cl_4	THYM
Binding of TCF/LEF:CTNNB1 to target gene promoters	RUNX3	0.0280754	cl_4	THYM
Interferon alpha/beta signaling	IRF8;IRF8	0.0280754	cl_4	THYM
Cytokine Signaling in Immune system	IRF8;IRF8;BATF;BATF	0.0280754	cl_4	THYM
RUNX3 regulates p14-ARF	RUNX3	0.0280754	cl_4	THYM
RUNX3 regulates NOTCH signaling	RUNX3	0.0280754	cl_4	THYM
Interleukin-4 and Interleukin-13 signaling	BATF;BATF	0.0301641	cl_4	THYM
Interferon gamma signaling	IRF8;IRF8	0.0412336	cl_4	THYM
Interferon Signaling	IRF8;IRF8	0.0491833	cl_4	THYM
NGF-stimulated transcription	LYL1	0.0491833	cl_4	THYM
Regulation of RUNX3 expression and activity	RUNX3	0.0491833	cl_4	THYM
Formation of the beta-catenin:TCF transactivating complex	RUNX3	0.0575781	cl_4	THYM
Nuclear Events (kinase and transcription factor activation)	LYL1	0.0683891	cl_4	THYM
Transcriptional regulation by RUNX3	RUNX3	0.0993376	cl_4	THYM
RUNX1 interacts with co-factors whose precise effect on RUNX1 targets is not known	CBFB;RYBP;BMI1;ARID2;RNF2	0.0513273	cl_1	UCEC
TP53 Regulates Transcription of DNA Repair Genes	BRCA1;CDK12;FANCD2;BRCA1;FANCD2	0.0343158	cl_2	UCEC
Constitutive Signaling by Aberrant PI3K in Cancer	ESR1	0.00329758	cl_5	UCEC
Extra-nuclear estrogen signaling	ESR1	0.00329758	cl_5	UCEC
TFAP2 (AP-2) family regulates transcription of growth factors and their receptors	ESR1;ESR1	0.00329758	cl_5	UCEC
PI5P, PP2A and IER3 Regulate PI3K/AKT Signaling	ESR1	0.00329758	cl_5	UCEC
Negative regulation of the PI3K/AKT network	ESR1	0.00329758	cl_5	UCEC
PI3K/AKT Signaling in Cancer	ESR1	0.00329758	cl_5	UCEC
Transcriptional regulation by the AP-2 (TFAP2) family of transcription factors	ESR1;ESR1	0.0101415	cl_5	UCEC
ESR-mediated signaling	ESR1	0.0149116	cl_5	UCEC
PIP3 activates AKT signaling	ESR1	0.0230585	cl_5	UCEC
Intracellular signaling by second messengers	ESR1	0.031038	cl_5	UCEC
Signaling by Nuclear Receptors	ESR1	0.031038	cl_5	UCEC
RUNX1 regulates transcription of genes involved in WNT signaling	ESR1	0.0324409	cl_5	UCEC
CREB3 factors activate genes	CREB3L4	0.0324409	cl_5	UCEC
RUNX1 regulates estrogen receptor mediated transcription	ESR1	0.0324409	cl_5	UCEC
Diseases of signal transduction by growth factor receptors and second messengers	ESR1	0.0548763	cl_5	UCEC
Cargo concentration in the ER	CD59	0.0852009	cl_5	UCEC
SUMOylation of intracellular receptors	ESR1	0.0852009	cl_5	UCEC
Ovarian tumor domain proteases	ESR1	0.0914518	cl_5	UCEC
Nuclear signaling by ERBB4	ESR1	0.0997566	cl_5	UCEC
