# Supplementary material for: A systems-based framework to computationally describe putative transcription factors and signaling pathways regulating glycan biosynthesis
Source: publisher site journal article supplement (doi:10.3762/bjoc.17.119), 2021-07-22
Supplement: Additional file 3 [file Table_S8.xlsx]

## Sheet: TableS8_Fishers_exact_test_adju
Fisher’s exact test to infer TF–glycosylation pathway relation (adjusted p-values)
glycoPath	TF	pEnrich	ctype
SA_paths	EGR2	0.0297657	BLCA
O_mannose	WDR5	0.0491836	BLCA
CS_DS_Extend	EGR2	0.0100047	BLCA
HA_Synthesis	ATF3	0.0146911	BRCA_1
CS_DS_Extend	FOXO1	0.0140552	BRCA_1
CS_DS_Extend	MEF2C	0.0161422	BRCA_1
GalNAc_Olinked	MECOM	0.017125	BRCA_1
Dolichol	MYBL2	0.00548346	BRCA_1
Terminal_Fucose	EHF	0.0362391	CESC
Blood_Groups	KLF5	0.00490406	CESC
GalNAc_Olinked	FOXA1	0.00819174	CESC
GalNAc_Olinked	MECOM	0.00853812	CESC
Dolichol	EED	0.0272928	CESC
Blood_Groups	TCF7L2	0.04	COAD_READ.
SA_paths	FOXP3	0.0280466	COAD_READ.
Type_1_2_LacNAc	KLF4	0.0231898	COAD_READ.
Type_1_2_LacNAc	TCF7L2	0.0168337	COAD_READ.
CS_DS_Extend	NR2F2	0.0395172	COAD_READ.
CS_DS_Extend	RUNX1	0.00028051	COAD_READ.
GalNAc_Olinked	KLF4	0.0231898	COAD_READ.
Dolichol	EED	0.0383524	COAD_READ.
Gangliosides	FOXP3	0.0280466	COAD_READ.
Blood_Groups	ERG	0.00792411	GBM.
GalNAc_Olinked	WWTR1	0.0114044	GBM.
GPI_Anchor	MBD3	0.0183859	HNSC
Blood_Groups	MEF2C	0.0170047	HNSC
SA_paths	MEF2C	0.0414268	HNSC
Type_1_2_LacNAc	FOXA1	0.0181396	HNSC
Dolichol	MYBL2	0.0103452	HNSC
Gangliosides	MEF2C	0.0170047	HNSC
Type_1_2_LacNAc	SRCAP	0.0205289	KICH
O_fucose	LMO2	0.0259246	KICH
O_mannose	MNT	0.00576103	KICH
GPI_Anchor	SUMO2	0.0427295	KIRC
O_mannose	KDM6B	0.0077894	KIRC
GalNAc_Olinked	BCAT1	0.012668	KIRC
GalNAc_Olinked	RUNX1	0.0130774	KIRC
Dolichol	DEK	0.0459067	KIRC
SA_paths	HES1	0.0189278	KIRP
O_mannose	RFX2	0.00796433	KIRP
HA_Synthesis	TCF21	0.0408163	KIRP
SA_paths	ETS1	0.0367732	LAML
SA_paths	TAL1	0.00166427	LAML
GalNAc_Olinked	GATA3	0.00905355	LAML
GalNAc_Olinked	TAL1	0.00392536	LAML
Dolichol	SSRP1	0.0430602	LAML
sulfated_glycans	CEBPA	0.0384867	LGG
LacdiNAc	MEF2C	0.0423614	LGG
SA_paths	CEBPA	0.0384867	LGG
SA_paths	MAF	0.0279023	LGG
SA_paths	MEF2C	0.0365377	LGG
Type_1_2_LacNAc	FOS	0.0226199	LGG
Type_1_2_LacNAc	JUN	0.0226199	LGG
Type_1_2_LacNAc	MEF2C	0.0365377	LGG
HS_Extend	BCL11A	0.000586934	LGG
HS_Extend	CBX7	0.0159061	LGG
HS_Extend	MEF2C	0.00165057	LGG
GalNAc_Olinked	MEF2C	0.0114084	LGG
Gangliosides	CBX7	0.021278	LGG
Gangliosides	MEF2C	0.0423614	LGG
Gangliosides	SOX10	0.0374616	LGG
P1PK_BloodGroup	FOS	0.0226199	LGG
P1PK_BloodGroup	JUN	0.0226199	LGG
O_mannose	DNMT3A	0.0304734	LUAD
GalNAc_Olinked	MEF2C	0.0218525	LUAD
CS_DS_Extend	RUNX1	0.0160369	MESO
P1PK_BloodGroup	RUNX1	0.0475308	OV
sulfated_glycans	EBF1	0.00339997	PAAD
sulfated_glycans	NFATC1	0.0083749	PAAD
SA_paths	EBF1	0.0405302	PAAD
SA_paths	FLI1	0.00124416	PAAD
SA_paths	IKZF1	0.019691	PAAD
SA_paths	MEIS3	0.0314574	PAAD
O_mannose	ZBTB17	0.0391892	PAAD
CS_DS_Extend	NFYB	0.0221324	PAAD
CS_DS_Extend	PRDM1	0.0137431	PAAD
GalNAc_Olinked	FOXA1	0.00304392	PAAD
GalNAc_Olinked	HNF4A	0.0129751	PAAD
GalNAc_Olinked	KLF5	0.000998252	PAAD
GalNAc_Olinked	MECOM	0.00304392	PAAD
GalNAc_Olinked	TCF7L2	2.41395e-05	PAAD
Gangliosides	FLI1	0.00972884	PAAD
Gangliosides	MAF	0.0309853	PAAD
Gangliosides	MEIS3	0.0314574	PAAD
SA_paths	ETS1	0.014823	PCPG
Type_1_2_LacNAc	MAFF	0.0282623	PCPG
O_fucose	ETS1	0.0303743	PCPG
HA_Synthesis	FOSL2	0.00225411	PCPG
CS_DS_Extend	CBFB	0.0114228	PCPG
P1PK_BloodGroup	MAFF	0.0282623	PCPG
GSL_Core	KDM6B	0.0222763	PRAD
GPI_Anchor	EZH2	0.0277317	SARC
O_fucose	CBFA2T3	0.0443848	SARC
SA_paths	MAF	0.0321479	STES.
CS_HS_Init	CTBP1	0.0443245	STES.
GalNAc_Olinked	MECOM	0.00283727	STES.
Dolichol	E2F1	0.0267048	STES.
Gangliosides	MAF	0.0321479	STES.
HS_Extend	GRHL3	0.00632517	TGCT
CS_DS_Extend	TCF21	0.0115908	TGCT
sulfated_glycans	TFAP2C	0.022661	THCA
Terminal_Fucose	IRF5	0.0023445	THCA
Terminal_Fucose	TFAP2C	0.022661	THCA
SA_paths	FLI1	0.000517243	THCA
SA_paths	TAL1	0.0406479	THCA
Type_1_2_LacNAc	KLF5	7.50174e-05	THCA
Type_1_2_LacNAc	RUNX1	0.00965197	THCA
Type_1_2_LacNAc	TFAP2C	0.022661	THCA
O_fucose	TAL1	0.0406479	THCA
Dolichol	SUMO1	0.00185466	THCA
P1PK_BloodGroup	KLF5	0.0462372	THCA
P1PK_BloodGroup	RUNX1	0.0362526	THCA
SA_paths	BACH2	0.00149674	THYM
SA_paths	IKZF1	0.0025909	THYM
SA_paths	IRF8	0.0497309	THYM
Type_1_2_LacNAc	TP63	0.0320154	THYM
O_fucose	IKZF1	0.0220622	THYM
Gangliosides	KDM2B	0.0452972	THYM
P1PK_BloodGroup	TP63	0.0340317	THYM
CS_HS_Init	BMI1	0.018759	UCEC
GalNAc_Olinked	HIF1A	0.0416806	UCEC
